# Supplementary material
Source: PubMed Central journal article supplement (PMC5864114)
Supplement: NIHMS942947-supplement-Supp_AppendixS1.pdf [file NIHMS942947-supplement-Supp_AppendixS1.pdf]

## Publication information

|                                                                                 |                                                                                                                                                                                                                                                                                                                                                                                                                                                                                                                                                                                                                                                                                                                                                                                                                                                              |
|---------------------------------------------------------------------------------|--------------------------------------------------------------------------------------------------------------------------------------------------------------------------------------------------------------------------------------------------------------------------------------------------------------------------------------------------------------------------------------------------------------------------------------------------------------------------------------------------------------------------------------------------------------------------------------------------------------------------------------------------------------------------------------------------------------------------------------------------------------------------------------------------------------------------------------------------------------|
| <b>miniannotation</b>                                                           | yes                                                                                                                                                                                                                                                                                                                                                                                                                                                                                                                                                                                                                                                                                                                                                                                                                                                          |
| <b>title</b>                                                                    | High Content and Transcriptome Analysis reveals functional roles of microRNAs in DRG neurite growth and its putative targets.                                                                                                                                                                                                                                                                                                                                                                                                                                                                                                                                                                                                                                                                                                                                |
| <b>description</b>                                                              | Peripheral neurons regenerate their axons after injury. Transcriptional regulation by microRNAs (miRNAs) is one possible mechanism that controls regeneration. We profiled miRNA expression in dorsal root ganglion (DRG) neurons after a sciatic nerve crush, and identified 49 differentially expressed miRNAs. We were able to evaluate the functional roles of the each miRNA using an High Content Analysis (HCA) approach. In order to predict the targets of the microRNAs we employed RNA-Sequencing to study transcription at the mRNA isoform level. We identified thousands of differentially expressed gene isoforms in the same model and then bioinformatically associated the miRNAs that modulated neurite growth with their putative target isoforms to describe the network of regulatory events underlying peripheral nerve regeneration. |
| <b>Investigator First Name</b>                                                  | Vance                                                                                                                                                                                                                                                                                                                                                                                                                                                                                                                                                                                                                                                                                                                                                                                                                                                        |
| <b>Investigator Last Name</b>                                                   | Lemmon                                                                                                                                                                                                                                                                                                                                                                                                                                                                                                                                                                                                                                                                                                                                                                                                                                                       |
| <b>Investigator Email</b>                                                       | vlemmon@med.miami.edu                                                                                                                                                                                                                                                                                                                                                                                                                                                                                                                                                                                                                                                                                                                                                                                                                                        |
| <b>Investigator Street Address</b>                                              | Lois Pope LIFE Center, Room 4-16 1095 NW 14th Terrace                                                                                                                                                                                                                                                                                                                                                                                                                                                                                                                                                                                                                                                                                                                                                                                                        |
| <b>Investigator City</b>                                                        | Miami                                                                                                                                                                                                                                                                                                                                                                                                                                                                                                                                                                                                                                                                                                                                                                                                                                                        |
| <b>Investigator State</b>                                                       | FL                                                                                                                                                                                                                                                                                                                                                                                                                                                                                                                                                                                                                                                                                                                                                                                                                                                           |
| <b>Investigator ZIP</b>                                                         | 33136                                                                                                                                                                                                                                                                                                                                                                                                                                                                                                                                                                                                                                                                                                                                                                                                                                                        |
| <b>Investigator Country</b>                                                     | United States                                                                                                                                                                                                                                                                                                                                                                                                                                                                                                                                                                                                                                                                                                                                                                                                                                                |
| <b>Investigator Affiliation</b>                                                 | The Miami Project to Cure Paralysis, Miller School of Medicine, University of Miami                                                                                                                                                                                                                                                                                                                                                                                                                                                                                                                                                                                                                                                                                                                                                                          |
| <b>Is the submitter a member of the laboratory that performed the research?</b> | Yes                                                                                                                                                                                                                                                                                                                                                                                                                                                                                                                                                                                                                                                                                                                                                                                                                                                          |
| <b>Submitter First Name</b>                                                     | Vance                                                                                                                                                                                                                                                                                                                                                                                                                                                                                                                                                                                                                                                                                                                                                                                                                                                        |
| <b>Submitter Mid Initial</b>                                                    | P                                                                                                                                                                                                                                                                                                                                                                                                                                                                                                                                                                                                                                                                                                                                                                                                                                                            |
| <b>Submitter Last Name</b>                                                      | Lemmon                                                                                                                                                                                                                                                                                                                                                                                                                                                                                                                                                                                                                                                                                                                                                                                                                                                       |
| <b>Submitter Email</b>                                                          | vlemmon@med.miami.edu                                                                                                                                                                                                                                                                                                                                                                                                                                                                                                                                                                                                                                                                                                                                                                                                                                        |
| <b>Submitter Affiliation</b>                                                    | The Miami Project to Cure Paralysis, Miller School of Medicine, University of Miami                                                                                                                                                                                                                                                                                                                                                                                                                                                                                                                                                                                                                                                                                                                                                                          |
| <b>Publication status</b>                                                       | In preparation                                                                                                                                                                                                                                                                                                                                                                                                                                                                                                                                                                                                                                                                                                                                                                                                                                               |

|                                 |                                                       |
|---------------------------------|-------------------------------------------------------|
| <b>Investigator Mid Initial</b> | P                                                     |
| <b>Submitter Street Address</b> | Lois Pope LIFE Center, Room 4-16 1095 NW 14th Terrace |
| <b>Submitter City</b>           | Miami                                                 |
| <b>Submitter State</b>          | FL                                                    |
| <b>Submitter ZIP</b>            | 33136                                                 |
| <b>Submitter Country</b>        | United States                                         |

**Authors**

| <b>First name</b> | <b>Last name</b> | <b>Identifier</b>   | <b>Affiliation</b>                                                                                                             |
|-------------------|------------------|---------------------|--------------------------------------------------------------------------------------------------------------------------------|
| Dario             | Motti            | 0000-0002-7714-4040 | The Miami Project to Cure Paralysis, Miller School of Medicine, University of Miami, Miami, Florida, United States of America. |
| Jessica           | Lerch            | 0000-0002-1210-3184 | The Miami Project to Cure Paralysis, Miller School of Medicine, University of Miami, Miami, Florida, United States of America. |
| Matt              | Danzi            | 0000-0003-1568-5965 | The Miami Project to Cure Paralysis, Miller School of Medicine, University of Miami, Miami, Florida, United States of America. |
| Jared             | Gans             |                     | The Miami Project to Cure Paralysis, Miller School of Medicine, University of Miami, Miami, Florida, United States of America. |

|         |        |                     |                                                                                                                                                      |
|---------|--------|---------------------|------------------------------------------------------------------------------------------------------------------------------------------------------|
| Frank   | Kuo    | 0000-0003-0655-4074 | The Miami Project to Cure Paralysis, Miller School of Medicine, University of Miami, Miami, Florida, United States of America.                       |
| Richard | Morris |                     | Dept of Genetics, Miller School of Medicine, University of Miami, Miami, Florida, United States of America.                                          |
| John    | Bixby  | 0000-0003-1633-5318 | The Miami Project to Cure Paralysis, Dept of Pharmacology, Miller School of Medicine, University of Miami, Miami, Florida, United States of America. |
| Vance   | Lemmon | 0000-0003-3550-7576 | The Miami Project to Cure Paralysis, Miller School of Medicine, University of Miami, Miami, Florida, United States of America.                       |

## Organism Section

|                                         |                                                        |
|-----------------------------------------|--------------------------------------------------------|
| <b>Animals used in a study group</b>    | 7 Days post surgery                                    |
| <b>Systematic name</b>                  | Mus musculus domesticus (western european house mouse) |
| <b>Provider/Vendor</b>                  | Jackson Labs                                           |
| <b>Age at sacrifice</b>                 | 6-8                                                    |
| <b>Age at sacrifice/Unit</b>            | Weeks                                                  |
| <b>Sex</b>                              | male                                                   |
| <b>Geno type</b>                        | WT                                                     |
| <b>Organism vendor catalogue number</b> | 000664                                                 |
| <b>strain</b>                           | C57BL/6J                                               |
| <b>Housing type</b>                     | group                                                  |
| <b>Light/Dark Cycle</b>                 | 12 light / 12 dark                                     |
| <b>Was light/dark cycle reversed?</b>   | no                                                     |
| <b>Enrichment</b>                       | nestlets                                               |
| <b>Food</b>                             | Teklad 7960 irradiated                                 |

organism

|                                         |                                                        |
|-----------------------------------------|--------------------------------------------------------|
| <b>Animals used in a study group</b>    | mice                                                   |
| <b>Systematic name</b>                  | Mus musculus domesticus (western european house mouse) |
| <b>Provider/Vendor</b>                  | Jackson Labs                                           |
| <b>Age at sacrifice</b>                 | 6-8                                                    |
| <b>Age at sacrifice/Unit</b>            | Weeks                                                  |
| <b>Sex</b>                              | male                                                   |
| <b>Geno type</b>                        | WT                                                     |
| <b>Organism vendor catalogue number</b> | 000664                                                 |
| <b>strain</b>                           | C57BL/6J                                               |
| <b>Housing type</b>                     | group                                                  |
| <b>Light/Dark Cycle</b>                 | 12 light / 12 dark                                     |
| <b>Was light/dark cycle reversed?</b>   | no                                                     |
| <b>Enrichment</b>                       | nestlets                                               |
| <b>Food</b>                             | Teklad 7960 irradiated                                 |

organism

## Experimental Conditions

### *Surgery Section*

|                                                                                   |                         |
|-----------------------------------------------------------------------------------|-------------------------|
| <b>Experimental Condition Type</b>                                                | Surgery                 |
| <b>Surgery unique name</b>                                                        | Sciatic Nerve 15" Crush |
| <b>Were anesthetics used?</b>                                                     | Yes                     |
| <b>Surgery type</b>                                                               | Injury                  |
| <b>Injury method</b>                                                              | Sciatic nerve crush     |
| <b>Compression maintained following impact?</b>                                   | Not described           |
| <b>Age at time of initial Surgery</b>                                             | 6-8                     |
| <b>Age at time of initial Surgery - Unit</b>                                      | Weeks                   |
| <b>Were experimenters blinded to treatments?</b>                                  | No                      |
| <b>Does the Phenotype of a transgenic animal make its genetic status obvious?</b> | No                      |

#### Injury level

|                                               |                  |
|-----------------------------------------------|------------------|
| <b>Number of surgeons in project</b>          | 1                |
| <b>Were analgesics used?</b>                  | No               |
| <b>Was hydration used?</b>                    | Yes              |
| <b>Post surgery hydration solution</b>        | lactated ringers |
| <b>Post surgery hydration dose volume</b>     | 2                |
| <b>Post surgery hydration delivery method</b> | i.p.             |
| <b>Post surgery hydration fFrequency</b>      | one time         |
| <b>Were antibiotics used?</b>                 | Yes              |
| <b>Post surgery antibiotic name</b>           | gentamicin       |
| <b>Post surgery antibiotic type</b>           | Systemic         |
| <b>Post surgery antibiotic dose</b>           | 5                |
| <b>Post surgery antibiotic dose unit</b>      | mg/kg            |

**Post surgery antibiotic solvent** water

**Was bladder expression performed?** No

**Were exclusion criteria established before the study was initiated?** No

### Anesthetics

| Anesthetic name | Anesthetic type | Anesthetic dose | Anesthetic dose unit | Anesthetic source | Anesthetic catalogue number | Anesthetic solvent | Anesthetic delivery method |
|-----------------|-----------------|-----------------|----------------------|-------------------|-----------------------------|--------------------|----------------------------|
| Ketamine        | Systemic        | 100             | mg/kg                |                   |                             | water              | i.p.                       |
| Xylazine        | Systemic        | 10              | mg/kg                |                   |                             | water              | i.p.                       |

### surgery

**Experimental Condition Type** Surgery

**Surgery unique name** Sciatic Nerve Crush - sham

**Were anesthetics used?** Yes

**Surgery type** Injury

**Injury method** Sciatic nerve crush

**Compression maintained following impact?** Not described

**Age at time of initial Surgery** 6-8

**Age at time of initial Surgery - Unit** Weeks

**Were experimenters blinded to treatments?** No

**Does the Phenotype of a transgenic animal make its genetic status obvious?** No

### Injury level

**Number of surgeons in project** 1

**Were analgesics used?** No

**Was hydration used?** Yes

**Post surgery hydration solution** lactated ringers

**Post surgery hydration dose volume** 2

**Post surgery hydration delivery method** i.p.

**Post surgery hydration frequency** one time

**Were antibiotics used?** Yes

**Post surgery antibiotic name** gentamicin

**Post surgery antibiotic type** Systemic

**Post surgery antibiotic dose** 5

**Post surgery antibiotic dose unit** mg/kg

**Post surgery antibiotic solvent** water

**Was bladder expression performed?** No

**Were exclusion criteria established before the study was initiated?** No

| Anesthetics     |                 |                 |                      |                   |                             |                    |                            |
|-----------------|-----------------|-----------------|----------------------|-------------------|-----------------------------|--------------------|----------------------------|
| Anesthetic name | Anesthetic type | Anesthetic dose | Anesthetic dose unit | Anesthetic source | Anesthetic catalogue number | Anesthetic solvent | Anesthetic delivery method |
| Ketamine        | Systemic        | 100             | mg/kg                |                   |                             | water              | i.p.                       |
| Xylazine        | Systemic        | 10              | mg/kg                |                   |                             | water              | i.p.                       |
| surgery         |                 |                 |                      |                   |                             |                    |                            |



## Outcome Measures

### *Imaging Section*

|                                                        |             |
|--------------------------------------------------------|-------------|
| <b>Outcome Measure Type</b>                            | Imaging     |
| <b>Imaging outcome measure name</b>                    | Axon growth |
| <b>Was Live Cell Imaging/ Time lapse performed?</b>    | no          |
| <b>Was Immunostaining performed?</b>                   | no          |
| <b>Were constant image acquisition standards used?</b> | no          |
| <b>Was Pixel binning performed?</b>                    | no          |
| <b>Was a microscope incubator used?</b>                | no          |
| <b>Was the incubator Humidified?</b>                   | no          |
| <b>Was Temperature of objective controlled?</b>        | no          |
| <b>Was Observer blinded to treatment?</b>              | no          |
| <b>Was Image analysis performed?</b>                   | No          |
| <b>Velocity of neurite growth or retraction</b>        | No          |
| <b>Varicosities in synapse formation</b>               | No          |
| <b>Neurite thickness</b>                               | No          |

imaging

## *Molecular Biology Section*

|                                                       |                   |
|-------------------------------------------------------|-------------------|
| <b>Outcome Measure Type</b>                           | Molecular Biology |
| <b>Molecular Biology outcome measure name</b>         | miRNA Expression  |
| <b>Was RT-PCR performed?</b>                          | No                |
| <b>Was DNase treatment used?</b>                      | No                |
| <b>Was Semi-quantitative gel based PCR performed?</b> | No                |

### Detection

|                                                     |                                                                  |
|-----------------------------------------------------|------------------------------------------------------------------|
| <b>Was Quantitative Real Time PCR performed?</b>    | Yes                                                              |
| <b>Real Time Primers</b>                            | microRNA Ready-to-Use PCR, Mouse&Rat panels I + II (Exiqon, USA) |
| <b>Reagent Kit</b>                                  | SYBR Green                                                       |
| <b>Instrument Manufacturer</b>                      | Roche LightCycler® 480 Instrument                                |
| <b>Was Chromatin immunoprecipitation performed?</b> | No                                                               |
| <b>Were Microarrays performed?</b>                  | No                                                               |
| <b>Was RNA-seq performed?</b>                       | No                                                               |
| <b>Was in situ hybridization performed?</b>         | No                                                               |

### Molecular Biology

|                                                       |                   |
|-------------------------------------------------------|-------------------|
| <b>Outcome Measure Type</b>                           | Molecular Biology |
| <b>Molecular Biology outcome measure name</b>         | RNA-seq           |
| <b>Was RT-PCR performed?</b>                          | No                |
| <b>Was DNase treatment used?</b>                      | No                |
| <b>Was Semi-quantitative gel based PCR performed?</b> | No                |

### Detection

|                                                  |    |
|--------------------------------------------------|----|
| <b>Was Quantitative Real Time PCR performed?</b> | No |
|--------------------------------------------------|----|

|                                                                     |          |
|---------------------------------------------------------------------|----------|
| <b>Was Chromatin immunoprecipitation performed?</b>                 | No       |
| <b>Were Microarrays performed?</b>                                  | No       |
| <b>Was RNA-seq performed?</b>                                       | Yes      |
| <b>Reference to RNA-seq data in Gene Expression Omnibus at NCBI</b> | GSE59547 |
| <b>Was in situ hybridization performed?</b>                         | No       |

Molecular Biology

|                                                       |                   |
|-------------------------------------------------------|-------------------|
| <b>Outcome Measure Type</b>                           | Molecular Biology |
| <b>Molecular Biology outcome measure name</b>         | miRNA Expression  |
| <b>Was RT-PCR performed?</b>                          | No                |
| <b>Was DNase treatment used?</b>                      | No                |
| <b>Was Semi-quantitative gel based PCR performed?</b> | No                |

Detection

|                                                     |                                                                  |
|-----------------------------------------------------|------------------------------------------------------------------|
| <b>Was Quantitative Real Time PCR performed?</b>    | Yes                                                              |
| <b>Real Time Primers</b>                            | microRNA Ready-to-Use PCR, Mouse&Rat panels I + II (Exiqon, USA) |
| <b>Reagent Kit</b>                                  | SYBR Green                                                       |
| <b>Instrument Manufacturer</b>                      | Roche LightCycler® 480 Instrument                                |
| <b>Was Chromatin immunoprecipitation performed?</b> | No                                                               |
| <b>Were Microarrays performed?</b>                  | No                                                               |
| <b>Was RNA-seq performed?</b>                       | No                                                               |
| <b>Was in situ hybridization performed?</b>         | No                                                               |

Molecular Biology

|                             |                   |
|-----------------------------|-------------------|
| <b>Outcome Measure Type</b> | Molecular Biology |
|-----------------------------|-------------------|

**Molecular Biology outcome measure name** RNA-seq

**Was RT-PCR performed?** No

**Was DNase treatment used?** No

**Was Semi-quantitative gel based PCR performed?** No

Detection

**Was Quantitative Real Time PCR performed?** No

**Was Chromatin immunoprecipitation performed?** No

**Were Microarrays performed?** No

**Was RNA-seq performed?** Yes

**Reference to RNA-seq data in Gene Expression Omnibus at NCBI** GSE59547

**Was in situ hybridization performed?** No

Molecular Biology

## Treatments

|              |                      |                             |
|--------------|----------------------|-----------------------------|
| Crush        | 7 Days post surgery, | Sciatic Nerve 15" Crush ,   |
| Sham Control | mice,                | Sciatic Nerve Crush - sham, |

## Study Groups

|              |               |                                               |
|--------------|---------------|-----------------------------------------------|
| Crush        | Crush,        | Axon growth,<br>miRNA Expression,<br>RNA-seq, |
| Sham control | Sham Control, | Axon growth,<br>miRNA Expression,<br>RNA-seq, |

## Primary findings

|                               |                                      |
|-------------------------------|--------------------------------------|
| <b>Treatment</b>              | Surgery - Sciatic Nerve 15" Crush    |
| <b>Outcome measure</b>        | Molecular Biology - miRNA Expression |
| <b>Study group</b>            | Crush                                |
| <b>Effect</b>                 | increase                             |
| <b>Time of observation</b>    | 7 days                               |
| <b>Baseline control group</b> | Sham surgery control group           |

---

|                               |                                   |
|-------------------------------|-----------------------------------|
| <b>Treatment</b>              | Surgery - Sciatic Nerve 15" Crush |
| <b>Outcome measure</b>        | Molecular Biology - RNA-seq       |
| <b>Study group</b>            | Sham control                      |
| <b>Effect</b>                 | increase                          |
| <b>Time of observation</b>    | 7 days                            |
| <b>Baseline control group</b> | Sham surgery control group        |

---

|                               |                                   |
|-------------------------------|-----------------------------------|
| <b>Treatment</b>              | Surgery - Sciatic Nerve 15" Crush |
| <b>Outcome measure</b>        | Imaging - Axon growth             |
| <b>Study group</b>            | Crush                             |
| <b>Effect</b>                 | increase                          |
| <b>Time of observation</b>    | 7 days                            |
| <b>Baseline control group</b> | Sham surgery control group        |

---
