# Supplementary material
Source: PubMed Central journal article supplement (PMC5864114)
Supplement: NIHMS942947-supplement-Supp_figS1-7.pdf [file NIHMS942947-supplement-Supp_figS1-7.pdf]

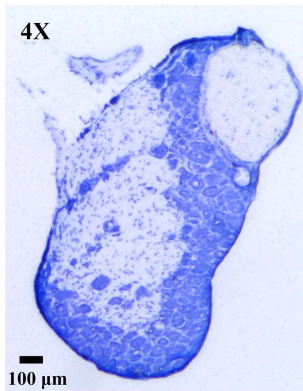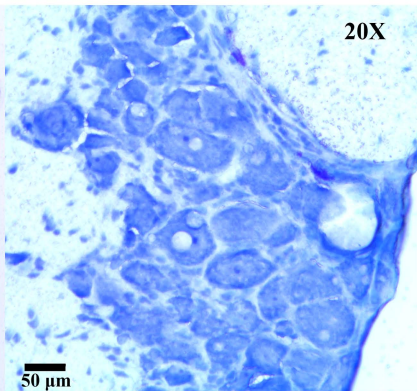

0 50 100

Control\_5

Control\_7

Control\_4

Control\_6

Crushed\_5

Crushed\_6

Crushed\_4

Crushed\_7

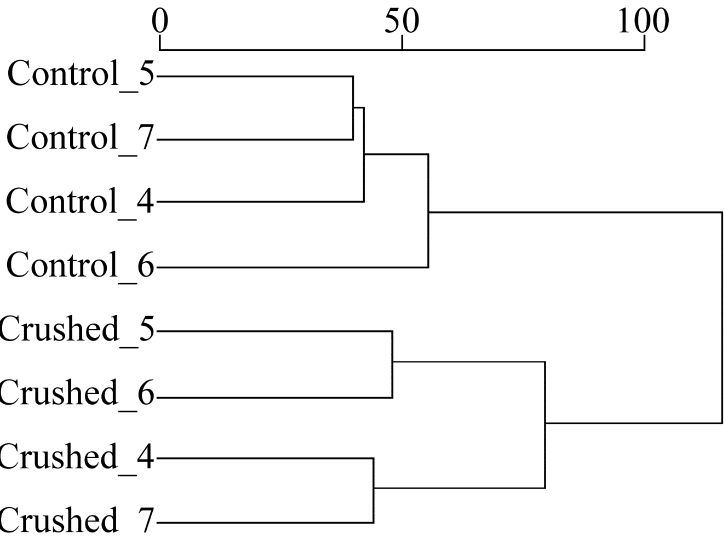

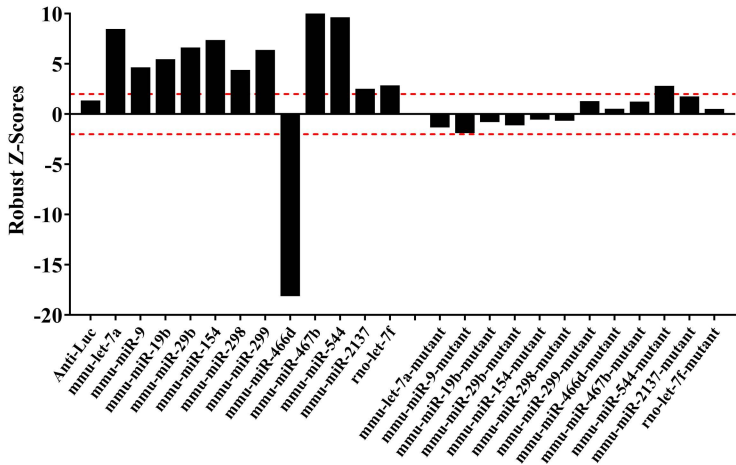

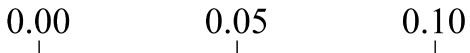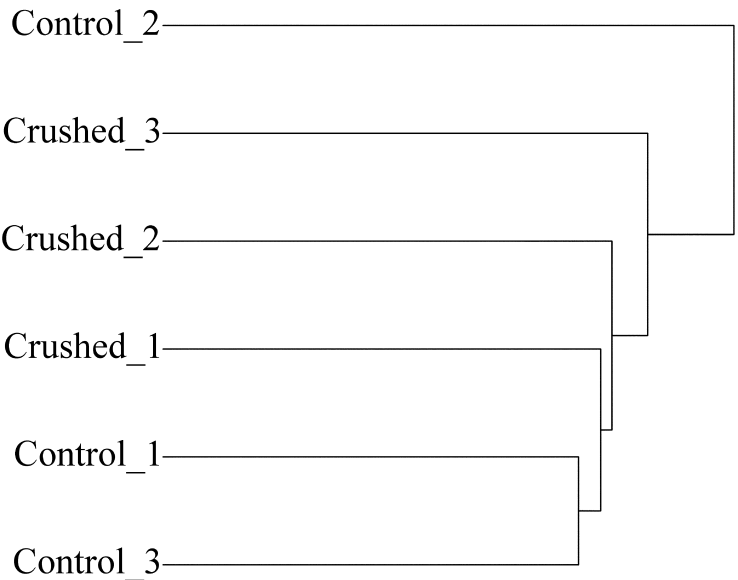

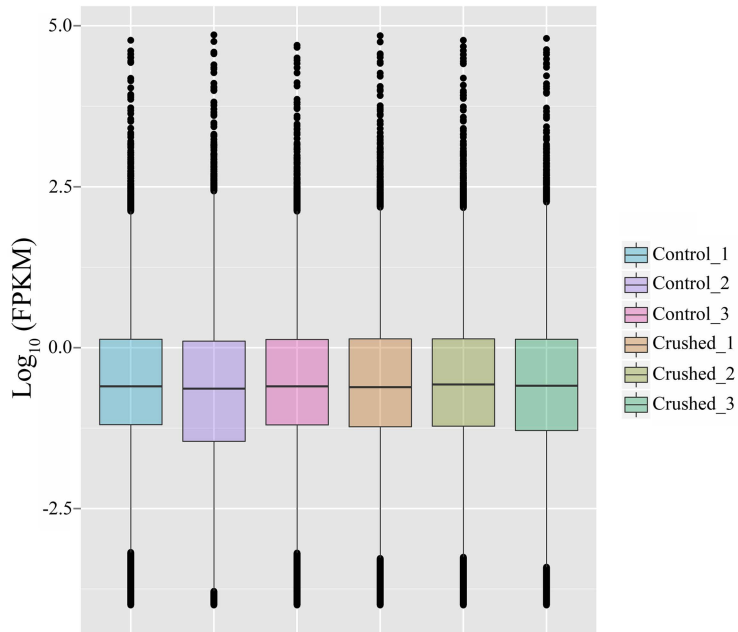

Context Scores

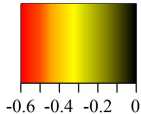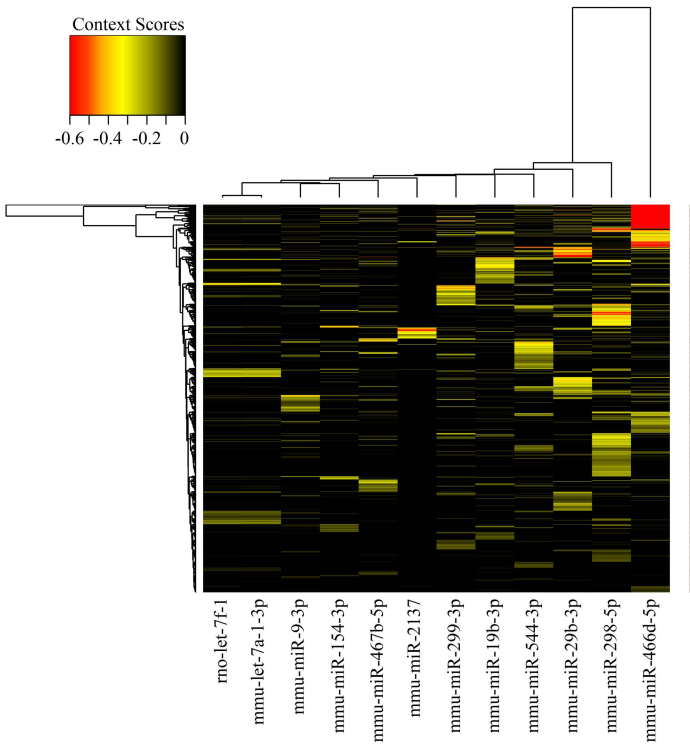

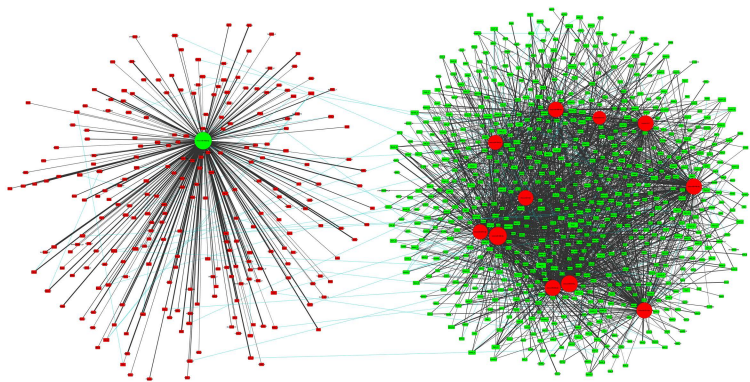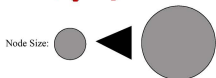

Number of Edges: 7

31

 miRNA-mRNA interactions

 isoforms of the same gene

 Upregulated

 Downregulated
