# Supplementary material
Source: PubMed Central journal article supplement (PMC5864114)
Supplement: NIHMS942947-supplement-Supp_TableS1.pdf [file NIHMS942947-supplement-Supp_TableS1.pdf]

Table S1

| MicroRNA             | PRIMER SEQUENCE                                                                                                         |
|----------------------|-------------------------------------------------------------------------------------------------------------------------|
| mmu-leu-7a-1 FORWARD | GCTGTGAGGTAGTAGGTTGTATAGTTTTAGGGTCACACCCACCACTGGGAGATAACTATACAATCTACTGTCTTTCCC                                          |
| mmu-leu-7a-1 REVERSE | TCCTGGGAAAGACAGTAGATTGTATAGTTATCTCCAGTGGTGGGTGTGACCCTAAAACATACAACCTACTACCTCA                                            |
| mmu-miR-101a FORWARD | GCTGTCAGTTATCACAGTGTGATGTGTCCATTCTAAAGGTACAGTACTGTGATAACTGAAC                                                           |
| mmu-miR-101a REVERSE | TCCTGTTTACAGTTATCACAGTACTGTACCTTTAGAATGGACAGCATCAGCACTGTGATAACTGA                                                       |
| mmu-miR-101b FORWARD | GCTGTCGGTTATCATGGTACCAGTGTGTAGCTCTGAAAGGTACAGTACTGTGATAGCTGAAC                                                          |
| mmu-miR-101b REVERSE | TCCTGTTTACAGTATCACAGTACTGTACCTTTCAGAGCTACAGCATCGGTACCATGATAACCGA                                                        |
| mmu-miR-135a FORWARD | GCTGTATGGCTTTTTATTCTATGTGATTCTATTGCTCGCTCATATAGGGATTGGAGCCGTGGCCG                                                       |
| mmu-miR-135a REVERSE | TCCTGCGCCACGGCTCCAATCCCTATATGAGCGAGCAATAGAATCACATAGGAATAAAAAGCCATA                                                      |
| mmu-miR-142 FORWARD  | GCTGCATAAAGTAGAAAGCACTACTAACAGCACTGGAGGGTGTAGTGTTCCTACTTTATGGAC                                                         |
| mmu-miR-142 REVERSE  | TCCTGTCCATAAAGTAGGAAACACTACACCCCTCCAGTGTGTTAGTAGTGTCTTCTACTTTATG                                                        |
| mmu-miR-144 FORWARD  | GCTGGGATATCATATATACTGTAAGTTTGTGATGAGACACTACAGTATAGATGATGACTC                                                            |
| mmu-miR-144 REVERSE  | TCCTGAGTACATCATCTATACTGTAGTGTCTCATCACAACCTTACAGTATATGATGATATCC                                                          |
| mmu-miR-146b FORWARD | GCTGTGAGAACTGAATCCATAGGCTGTGAGCTCTAGCAGACGCCCTAGGGACTCAGTTCTGGTC                                                        |
| mmu-miR-146b REVERSE | TCCTGACCAGAACTGAGTCCCTAGGGCGTCTGCTAGAGCTCACAGCCTATGGAATTCAGTTCTCA                                                       |
| mmu-miR-154 FORWARD  | GCTGTAGGTTATCCGTGTGCTTCGCTTTATTCGTGACGAATCATACACGGTTGACCTATTC                                                           |
| mmu-miR-154 REVERSE  | TCCTGAATAGGTCAACCGTGTATGATTTCGTACGAATAAAGCGAAGCAACACGGATAACCTA                                                          |
| mmu-miR-17 FORWARD   | GCTGCAAAGTGCTTACAGTGCAGGTAGTGTGTGTCATCTACTGCAGTGAGGGCACTGTAGC                                                           |
| mmu-miR-17 REVERSE   | TCCTGCTACAAGTGCCTCCTACTGCAGTAGATGCACACATCACTACTGCAGTGAAGCACTTTG                                                         |
| mmu-miR-1983 FORWARD | GCTGAGAAAGCATGCTCCAGTGGCGCAATCGGTTAGCGCGGGTACTTATACAGCAGTATATGTGCGGGTGATGCCGAGGT<br>TGTGAGTTCGAGCCTCACCTGGAGCATGTTTCTC  |
| mmu-miR-1983 REVERSE | TCCTGAGAAAACATGCTCCAGTGGAGGCTCGAACTCACAACCTCGGCATCACCCGCACATATACTGCTGTATAAGTACCGC<br>GCGCTAACCGATTGCGCCACTGGAGCATGCTTCT |
| mmu-miR-19a FORWARD  | GCTGTAGTTTTGCATAGTTGCACTACAAGAAGAATGTAGTTGTGCAAATCTATGCAAAACTGAC                                                        |
| mmu-miR-19a REVERSE  | TCCTGTCAGTTTTGCATAGATTTGCACAACACTACATCTTCTTGTAGTGCAAATGCAAAAATA                                                         |
| mmu-miR-19b FORWARD  | GCTGAGTTTTGCAGGTTTGCATCCAGCTGTATAATATTCTGCTGTGCAAATCCATGCAAAACTGAC                                                      |
| mmu-miR-19b REVERSE  | TCCTGTCAGTTTTGCATGGATTTGCACAGCAGAATATTATACAGCTGGATGCAAACTGCAAAACT                                                       |
| mmu-miR-21 FORWARD   | GCTGTAGCTTATCAGACTGATGTTGACTGTGAACTCTCATGGCAACAGCAGTGCATGGGCTGTCC                                                       |
| mmu-miR-21 REVERSE   | TCCTGGACAGCCATCGACTGCTGTTGCCATGAGATTCAACAGTCAACATCAGTCTGATAAGCTA                                                        |
| mmu-miR-2137 FORWARD | GCTGCTTCTGTGCCTTGTGGCTTGCCGGCGGGAGCCCCAGGGAGC                                                                           |
| mmu-miR-2137 REVERSE | TCCTGCTCCCTGGGGCTCCCGCCGCAAGCCAACAAGGCAGCAGGAAG                                                                         |
| mmu-miR-219 FORWARD  | GCTGTGATTGTCAAACGCAATCTCTGAGTCTCTGGCTCCGGCCGAGAGTTGCGTCTGGACGTCCTCCG                                                    |
| mmu-miR-219 REVERSE  | TCCTGCGGGACGTCAGACGCAACTCTCGGCCGGAGCCAGAGACTCGAGAATTGCGTTGGACAATCA                                                      |
| mmu-miR-222 FORWARD  | GCTGTCAGTAGCCAGTGTAGATCCTGTCTTTGGTAATCAGCAGTACATCTGGTACTGGGTC                                                           |
| mmu-miR-222 REVERSE  | TCCTGACCCAGTAGCCAGATGTAGTGTGATTACCAAAGACAGGATCTACTGCTACTGTA                                                             |
| mmu-miR-223 FORWARD  | GCTGCGTGTATTGACAAGCTGAGTTGGACACTCTGTGTGGTAGAGTGTGAGTTGTCAAATACCCAC                                                      |
| mmu-miR-223 REVERSE  | TCCTGTGGGGTATTTGACAACTGACACTTACCACACAGAGTGTCCAACCTCAGTTGTCAAATACACG                                                     |
| mmu-miR-27a FORWARD  | GCTGAGGGCTTAGCTGCTTTGTGAGCAAGGTCCACAGCAAAGTGTGTTACAGTGGCTAAGTTCCGCC                                                     |
| mmu-miR-27a REVERSE  | TCCTGGCGGAACCTTAGCCACTGTGAACACGACTTTGCTGTGGACCTTGCTCACAAGCAGCTAAGCCCT                                                   |
| mmu-miR-28 FORWARD   | GCTGAAGGAGCTCACAGTCTATTGAGTTGCCTTTCTGATTCTCCACTAGATTGTGAGCTGCTGGAC                                                      |
| mmu-miR-28 REVERSE   | TCCTGTCCAGCAGCTCACAATCTAGTGGGAGAATCAGAAAGGCAACTCAATAGACTGTGAGCTCCTT                                                     |
| mmu-miR-290 FORWARD  | GCTGGTACTCAAACATATGGGGGCACTTTTTTTTTCTTTAAAAAGTGCCGCTAGTTTTAAGCCCC                                                       |
| mmu-miR-290 FORWARD  | GCTGGTACTCAAACATATGGGGGCACTTTTTTTTTCTTTAAAAAGTGCCGCTAGTTTTAAGCCCC                                                       |
| mmu-miR-290 REVERSE  | TCCTGGGGCTTAAAACTAGGCGGCACTTTTTAAAGAAAAAAAAGTGCCCCCATAGTTTGAGTAC                                                        |

|                      |                                                                                            |
|----------------------|--------------------------------------------------------------------------------------------|
| mmu-miR-290 REVERSE  | TCCTGGGGCTTAAAACTAGGCGGCACCTTTTAAAGAAAAAAAAAAGTGCCCCATAGTTTGAGTAC                          |
| mmu-miR-298 FORWARD  | GCTGGGCAGAGGAGGCTGTCTCCCTTGAGTTTATGACTGGGAGGAAC TAGCCTTCTCTCAGCC                           |
| mmu-miR-298 REVERSE  | TCCTGGCTGAGAGAAGGCTAGTTCCTCCAGTCATAAACTCAAGGAAGAACAGCCCTCTCTGCC                            |
| mmu-miR-299 FORWARD  | GCTGTGGTTTACCGTCCCACATACATTTTGGAGTATGTATGTTGGGACGGTAAACCGCTTC                              |
| mmu-miR-299 REVERSE  | TCCTGAAGCGGTTTACCGTCCCACATACATACTCAAATGTATGTGGGACGGTAAACCA                                 |
| mmu-miR-29b FORWARD  | GCTGGCTGGTTTCATATGGTGGTTTATAGTTTAAATAGTGATTGTCTAGCACCATTGAAATCAGTGTTT                      |
| mmu-miR-29b REVERSE  | TCCTGAACACTGATTTCAAATGGTGTAGACAATCACTATTTAAATCTAAACCACCATATGAAACCAGC                       |
| mmu-miR-323 FORWARD  | GCTGAGGTGGTCCGTGGCGGTTTCGCTTCATTTATGGCGCACATTACACGGTCGACCTCTC                              |
| mmu-miR-323 REVERSE  | TCCTGAGAGGTCGACCGTGAATGTGCGCCATAAATGAAGCGAACGCGCCACGGACCCT                                 |
| mmu-mir-344 FORWARD  | GCTGCCAGTCAGGCTCCTGGCTAGATTCCAGGTACCAGCTGGTACCTGATCTAGCCAAAGCCTGACTGTC                     |
| mmu-miR-344 FORWARD  | GCTGCCAGTCAGGCTCCTGGCTAGATTCCAGGTACCAGCTGGTACCTGATCTAGCCAAAGCCTGACTGTC                     |
| mmu-mir-344 REVERSE  | TCCTGACAGTCAGGCTTTGGCTAGATCAGGTACCAGCTGGTACCTGGAATCTAGCCAGGAGCCTGACTGG                     |
| mmu-miR-344 REVERSE  | TCCTGACAGTCAGGCTTTGGCTAGATCAGGTACCAGCTGGTACCTGGAATCTAGCCAGGAGCCTGACTGG                     |
| mmu-miR-34c FORWARD  | GCTGAGGCAGTGTAGTTAGCTGATTGCTAATAGTACCAATCACTAACCACACAGCCAGGC                               |
| mmu-miR-34c REVERSE  | TCCTGCCTGGCTGTGTGGTTAGTGATTGGTACTATTAGCAATCAGCTAACTACTGCTCT                                |
| mmu-miR-380 FORWARD  | GCTGATGGTTGACCATAGAACATGCGCTACTTCTGTGTCGATGTAGTATGGTCCACATCTTC                             |
| mmu-miR-380 REVERSE  | TCCTGAAGATGTGGACCATACTACATACGACACAGAAGTAGCGCATGTTCTATGGTCAACCAT                            |
| mmu-miR-423 FORWARD  | GCTGTGAGGGGCAGAGAGCGAGACTTTTCTATTTTCCAAAAGCTCGGTCTGAGGCCCTCAGTC                            |
| mmu-miR-423 REVERSE  | TCCTGACTGAGGGGCCTCAGACCAGGCTTTTGGAAAATAGAAAAGTCTCGCTCTCTGCCCTCA                            |
| mmu-miR-433 FORWARD  | GCTGTACGGTGAGCCTGTCAITATTTCAGAGAGGCTAGATCCTCTGTGTTGAGAAGGATCATGATGGGCTCCTCGGTGTC           |
| mmu-miR-433 REVERSE  | TCCTGACACCGAGGAGCCCATCATGATCCTTCTCAACACAGAGGATCTAGCCTCTCTGAATAATGACAGGCTCACCGTA            |
| mmu-mir-450a FORWARD | GCTGGTTTTGCGATGTGTTCTTAATATGTGCTATAATTATATTGGGAACATTTTGCATAAATC                            |
| mmu-miR-450a FORWARD | GCTGGTTTTGCGATGTGTTCTTAATATGTGCTATAATTATATTGGGAACATTTTGCATAAATC                            |
| mmu-mir-450a REVERSE | TCCTGATTTATGCAAAATGTTCCCAATATAATTATAGCACATATTAGGAACACATCGCAAAAAC                           |
| mmu-miR-450a REVERSE | TCCTGATTTATGCAAAATGTTCCCAATATAATTATAGCACATATTAGGAACACATCGCAAAAAC                           |
| mmu-miR-450b FORWARD | GCTGTTTTGCAGTATGTTCTGAATACATAACATAAGCGTATTGGGAACATTTTGCATGCATC                             |
| mmu-miR-450b REVERSE | TCCTGATGCATGCAAAATGTTCCCAATACGCTTATGTTATGTATTCCAGGAACATACTGCAAAA                           |
| mmu-miR-466d FORWARD | GCTGTGTGTGTGCGTACATGTACATGTGTGTATATGAATATACATATACATACACGCACACATAGATACGCACGCACAC            |
| mmu-miR-466d REVERSE | TCCTGTGTGCGTGCATCTATGTGTGCGTGTATGTATATGTATATTCATATACACACATGTACATGTACGCACACACA              |
| mmu-miR-467b FORWARD | GCTGGTAAGTGCCTGCATGTATATGCGTGTATATTTTATGCATATACATACACACCAACACC                             |
| mmu-miR-467b REVERSE | TCCTGGTGTGGTGTGTGTATGTATATGCATAAAATATACGCATATACATGCAGGCACTTAC                              |
| mmu-miR-487b FORWARD | GCTGTGGTTATCCCTGTCTCTTCGCTTCACTCATGCCGAATCGTACAGGGTCATCCACTTC                              |
| mmu-miR-487b REVERSE | TCCTGAAGTGGATGACCCGTGACGATTCGGCATGAGTGAAGCGAAGAGGACAGGGATAACCA                             |
| mmu-miR-488 FORWARD  | GCTGCCAGATAATAGCACTCTCAAACAAGTTCCATGTTGTTGAAAGGCTGTTTCTGGTCC                               |
| mmu-miR-488 REVERSE  | TCCTGGACCAAGAAAACAGCCTTTCAAACAACATGGAAACTGTTTGGAGTGTCTATTATCTGGG                           |
| mmu-miR-544 FORWARD  | GCTGTCTTGTAAAAAGCAGAGTCTGATTGAGGGGCCAAGATTCTGCATTTTATAGCAAGCTCC                            |
| mmu-miR-544 REVERSE  | TCCTGGAGCTTGCTAAAAATGCAGAATCTTGGCCCTCAATCAGACTCTGCTTTTTAAACAAGA                            |
| mmu-miR-9 FORWARD    | GCTGATCTTTGGTTATCTAGCTGTATGAGTGGTGTGGAGTCTTCATAAAGCTAGATAACCGAAAGTC                        |
| mmu-miR-9 REVERSE    | TCCTGACTTTCGGTTATCTAGCTTTATGAAGACTCCACACCCTCATACAGCTAGATAACCAAGAT                          |
| mo-leu-7f-1 FORWARD  | GCTGGAGTGAGGTAGTAGATTGTATAGTTGTGGGGTAGTGATTTTACCCTGTTTAGGAGATAACTATACAATCTATTGCCTTC<br>CCC |
| mo-leu-7f-1 REVERSE  | TCCTGGGGAAGGCAATAGATTGTATAGTTATCTCCTAAACAGGGTAAAATCACTACCCACAATATAAATCTACTACCTC<br>ACTC    |
| mo-miR-136 FORWARD   | GCTGAGGACTCCATTTGTTTTGATGATGGATTCTTAAGTCCATCATCGTCTCAAATGAGTCTTC                           |

|                        |                                                                         |
|------------------------|-------------------------------------------------------------------------|
| mo-miR-136 REVERSE     | TCCTGAAGACTCATTGAGACGATGATGGAGCTTAAGAATCCATCATCAAAACAAATGGAGTCCT        |
| mo-miR-146b FORWARD    | GCTGTCTGAGAACTGAATCCATAGGCTGTGAGCTCTAGCAGACGCCCTAGGGACTCAGTCTGGTC       |
| mo-miR-146b REVERSE    | TCCTGACCAGAACTGAGTCCCTAGGGCGTCTGCTAGAGCTCACAGCCTATGGAATTCAGTTCTCAGA     |
| mo-miR-290 FORWARD     | GCTGTCTCAAACATAGGGGGCACTTTTTTTTCTTTAAAAAGTGCCGCCAGGTTTAGGC              |
| mo-miR-290 REVERSE     | TCCTGCCTAAACCTGGCGGCACCTTTTAAAGAAAAAAAAGTGCCCCCATAGTTTGAGA              |
| mo-miR-337 FORWARD     | GCTGGAACGGCGTCATGCAGGAGTTGATTGCACAGCCATTCAGTCTATATGATGCCTTTCC           |
| mo-miR-337 REVERSE     | TCCTGAAAGGCATCATATAGGAGCTGAATGGCTGTGCAATCAACTCCTGCATGACGCCGTTTC         |
| mo-miR-344a-3p FORWARD | GCTGACCAGTCAGGCTCCTGGCTAGATTCCAGGTACCAACTGGTACCTGATCTAGCCAAAGCCTGACCGTC |
| mo-miR-344a-3p REVERSE | TCCTGACGGTCAGGCTTTGGCTAGATCAGGTACCAGTTGGTACCTGGAATCTAGCCAGGAGCCTGACTGGT |
| mo-miR-345-3p FORWARD  | GCTGGCCTGCTGACCCCTAGTCCAGTGCTTGTGGTGGCTACTGGGCCCTGAACTAGGGGTCTGGAGACC   |
| mo-miR-345-3p REVERSE  | TCCTGGTCTCCAGACCCCTAGTTCAGGGCCAGTAGCCACCACAAGCACTGGACTAGGGGTCTAGCAGGC   |
| mo-miR-450a FORWARD    | GCTGTTTTGCGATGTGTTCTTAATGTGTGCTACAATTATTTGGGAACATTTTGCATAAC             |
| mo-miR-450a REVERSE    | TCCTGTTATGCAAAATGTTCCAATATAATTGTAGCACACATTAGGAACACATCGCAAAA             |
