# Supplementary material
Source: PubMed Central journal article supplement (PMC5864114)
Supplement: NIHMS942947-supplement-Supp_TableS2.pdf [file NIHMS942947-supplement-Supp_TableS2.pdf]

Table S2

| MicroRNA               | SEQUENCE                                                                               |
|------------------------|----------------------------------------------------------------------------------------|
| Mmu-let-7a-mutant_FW   | GCTGTGTGAGGATAGGTTGTATAGTTTTAGGGTFCACCCACCACTGGGAGATAACCTAATAATCTACTGTCTTTCCC          |
| Mmu-miR-9-mutant_FW    | GCTGATGTTTCGTTTATCTAGCTGTATGAGTGGTGTGGAGTCTTCAATCAGTAAAGATAACCGAAAGTC                  |
| Mmu-miR-19-mutant_FW   | GCTGATCCGGTTTAGGTTTGCATCCAGCTGTATAATATTCTGCTACGATAGTCCATGCAAAAAGTAC                    |
| Mmu-miR-29-mutant_FW   | GCTGGTTGTGTCCATATGGTGGTTAGATTTAAATAGTGATTGTCTACACGACTTTGAAATCAGTGTTCC                  |
| Mmu-miR-154-mutant_FW  | GCTGTTGTATAGCCGTGTTGCCTTCGCTTTATTCGTGACGATACTACAACGGTTGACCTATTC                        |
| Mmu-miR-298-mutant_FW  | GCTGGGGCGAGAAAGGGCTGTTCTTCCCTTGAGTTTTATGACTGGGTGAACGAAGCCTTCTCTCAGCC                   |
| Mmu-miR-299-mutant_FW  | GCTGTGCTAGTTCGTCACATACATTTTGAGTATGTGTTGGGAACGGTAAACCGCTTC                              |
| Mmu-miR-466d-mutant_FW | GCTGTGGTTTGGCGTACATGTACATGTGTGTATATGAATATACATACTATAACACGCACACATAGATACGCACACAC          |
| Mmu-miR-467b-mutant_FW | GCTGGCGATAGTCTGCATGTATATGCGTGTATATTTATGCAATAATTCACACACACCAACACC                        |
| Mmu-miR-544-mutant_FW  | GCTGTTTGTCTTAAAAGCAGAGTCTGATTGAGGGGCCAAGATCTCTGATTTTGTAGCAAGCTCC                       |
| Mmu-miR-2137-mutant_FW | GCTGCTTCTGCTGCCTTGTGGCTTGGCGCGGAGCCCCAGGGAGC                                           |
| Rno-let-7f-mutant_FW   | GCTGGAGTAGTGGGATAGATTGTATAGTTGTGGGGTAGTGATTTTACCCTGTTTAGGAGATAACTTACAAATCTATTGCCTTCCCC |
| Mmu-let-7a-mutant_RV   | TCCTGGGAAAGACAGTAGATTATAGGTTATCTCCCAGTGGTGGGTGTGACCTAAAACCTATACAACTATCCTCACA           |
| Mmu-miR-9-mutant_RV    | TCCTGACTTTCGGTTATCTTACTGATTGAAGACTCCACACCACTCATAACAGCTAGATAAACGAACAT                   |
| Mmu-miR-19-mutant_RV   | TCCTGTCAGTTTGCATGGACTATCGTAGCAGAATATTATACAGCTGGATGCAAACCTAAAACCGAT                     |
| Mmu-miR-29-mutant_RV   | TCCTGAACACTGATTTCAAAAGTCGTGTAGACAATCACTATTTAAATCTAAAACCATATGGACACAAC                   |
| Mmu-miR-154-mutant_RV  | TCCTGAATAGGTCAACCGTTGTAGTATCGTCACGAATAAAGCGAAGGCAACACGGCTATACAA                        |
| Mmu-miR-298-mutant_RV  | TCCTGGCTGAGAGAAGGCTTCGTTACCCAGTCATAAACTCAAGGGAAGAACAGCCCTTCTCGCCC                      |
| Mmu-miR-299-mutant_RV  | TCCTGAAGCGGTTTACCCTTCCCAACACATACTCAAAATGTATGTGGGACGAACTAGCA                            |
| Mmu-miR-466d-mutant_RV | TCCTGTGTGCGTGCATCTATGTGTGCGTGTATAGTATGTATATTCATATACACACATGTACATGTACGCCAAACCA           |
| Mmu-miR-467b-mutant_RV | TCCTGGTGTGGTGTGTGAATTATGCATAAAATATACACGCATATACATGCAGACTATCGC                           |
| Mmu-miR-544-mutant_RV  | TCCTGGAGCTTGCTAAAATCAGAGATCTTGGCCCTCAATCAGACTCTGCTTTTAAGCAAAA                          |
| Mmu-miR-2137-mutant_RV | TCCTGCTCCCTGGGGCTCCGCGCCGCAAGCCAACAAGGCAGCAGGAAG                                       |
| Rno-let-7f-mutant_RV   | TCCTGGGAAAGCAATAGATTGTAAAGTTATCTCTAAACAGGGTAAAATCACTACCCCACTATAACAATCTATCCCACTACTC     |
