# Supplementary material
Source: PubMed Central journal article supplement (PMC5864114)
Supplement: NIHMS942947-supplement-Supp_TableS3.pdf [file NIHMS942947-supplement-Supp_TableS3.pdf]

**Table S3.**

| <b>MicroRNAs</b> | <b>Log2(Fold Change)</b> | <b>p-value</b> |
|------------------|--------------------------|----------------|
| mmu-let-7a-1-3p  | 1.026                    | 0.025          |
| mmu-miR-101a-3p  | 1.036                    | 0.012          |
| mmu-miR-101a-5p  | 3.747                    | 0.027          |
| mmu-miR-101b-3p  | 1.206                    | 0.002          |
| mmu-miR-1188-5p  | 4.092                    | 0.045          |
| mmu-miR-135a-5p  | 3.660                    | 0.027          |
| mmu-miR-142-3p   | 2.349                    | 0.007          |
| mmu-miR-142-5p   | 3.800                    | 0.028          |
| mmu-miR-144-3p   | 2.516                    | 0.018          |
| mmu-miR-146b-5p  | 3.675                    | 0.027          |
| mmu-miR-154-3p   | 5.014                    | 0.000          |
| mmu-miR-17-5p    | 5.318                    | 0.000          |
| mmu-miR-1983     | 3.412                    | 0.027          |
| mmu-miR-19a-3p   | 4.028                    | 0.031          |
| mmu-miR-19b-3p   | 1.046                    | 0.001          |
| mmu-miR-21-5p    | 2.376                    | 0.000          |
| mmu-miR-2137     | 5.347                    | 0.000          |
| mmu-miR-2145     | -1.636                   | 0.028          |
| mmu-miR-219-5p   | 4.868                    | 0.007          |
| mmu-miR-222-3p   | 1.006                    | 0.005          |
| mmu-miR-223-3p   | 1.199                    | 0.003          |
| mmu-miR-27a-5p   | -1.749                   | 0.030          |
| mmu-miR-28-3p    | 3.875                    | 0.028          |
| mmu-miR-298-5p   | 5.776                    | 0.000          |
| mmu-miR-299-3p   | 4.953                    | 0.000          |
| mmu-miR-29b-3p   | 1.009                    | 0.002          |
| mmu-miR-323-3p   | 4.643                    | 0.007          |
| mmu-miR-34c-5p   | 5.013                    | 0.034          |
| mmu-miR-380-3p   | 1.066                    | 0.005          |
| mmu-miR-380-5p   | 4.633                    | 0.014          |
| mmu-miR-423-5p   | 3.990                    | 0.028          |
| mmu-miR-433-5p   | 4.347                    | 0.017          |
| mmu-miR-450b-3p  | -3.583                   | 0.044          |
| mmu-miR-466d-5p  | -5.025                   | 0.014          |
| mmu-miR-467b-5p  | 4.055                    | 0.045          |
| mmu-miR-487b-3p  | 3.728                    | 0.026          |
| mmu-miR-488-3p   | 3.608                    | 0.027          |
| mmu-miR-544-3p   | 6.663                    | 0.000          |
| mmu-miR-9-3p     | 5.348                    | 0.000          |

|                 |        |       |
|-----------------|--------|-------|
| rno-let-7f-1-3p | 3.977  | 0.027 |
| rno-miR-136-5p  | 1.139  | 0.019 |
| rno-miR-146b-3p | 1.049  | 0.042 |
| rno-miR-223     | 1.179  | 0.001 |
| rno-miR-290     | -1.034 | 0.015 |
| rno-miR-337-5p  | 1.031  | 0.003 |
| rno-miR-344a-3p | 4.000  | 0.017 |
| rno-miR-345-3p  | 3.535  | 0.027 |
| rno-miR-450a-5p | 3.595  | 0.027 |
| rno-miR-544     | 5.067  | 0.000 |
