# Supplementary material
Source: PubMed Central journal article supplement (PMC5864114)
Supplement: NIHMS942947-supplement-Supp_TableS4.pdf [file NIHMS942947-supplement-Supp_TableS4.pdf]

**Table S4:**

| <b>SAMPLE</b>  | <b>THRESHOLD<br/>FPKM</b> |
|----------------|---------------------------|
| Control_1      | 0.0412                    |
| Control_2      | 0.0444                    |
| Control_3      | 0.0459                    |
| Crushed_1      | 0.0461                    |
| Crushed_2      | 0.0527                    |
| Crushed_3      | 0.0493                    |
| <b>AVERAGE</b> | <b>0.0466</b>             |
