# Supplementary material
Source: PubMed Central journal article supplement (PMC5864114)
Supplement: NIHMS942947-supplement-Supp_TableS5.pdf [file NIHMS942947-supplement-Supp_TableS5.pdf]

Table S5.

| TRACKING ID    | GENE NAME             | FORWARD PRIMER           | REVERSE PRIMER         |
|----------------|-----------------------|--------------------------|------------------------|
| TCONS_00088184 | <b>Acot7_j2_1</b>     | TTGATGAGAATCTTTTGTCTGAGG | CATGGGTGACAGGAAGTCAGT  |
| TCONS_00089052 | <b>C1qc_j1</b>        | GCGAGCGAGTTGTGGTTT       | GATTCCTGGCTCTCCCTTG    |
| TCONS_00084418 | <b>Car3_j1_1</b>      | ACCTGCAATCCAATACTCAAG    | TGAAGCTCAGCAGCGTATTTTA |
| TCONS_00012773 | <b>Cd24a_j3</b>       | TGACTCTTCGCCTCTGCTTT     | TCCTGGCCTGAGTCTCTAACA  |
| TCONS_00106926 | <b>Chchd3_j2_1</b>    | AGCAGCAGCAGCAGCTTTCATT   | TCACTCGGTCTTCTCTCCA    |
| TCONS_00008160 | <b>Dbi_j5_1</b>       | TGCCCTGTACAGAAGAGATG     | GTCCCTTTCAGCTTGTCCA    |
| TCONS_00026271 | <b>Dync1h1_j11_1</b>  | CAAACACATGCTTCTGACGA     | TCTTATCCGGTGAGATGTTCTG |
| TCONS_00024418 | <b>Egfr_j2_1</b>      | AAAGGGGTGTCACTTCTCTG     | TCCACAAACTCCCTGGTTC    |
| TCONS_00020769 | <b>Gaa_j2_1</b>       | GTTCTTCCCTCTGGGCTCTT     | GGGGTTCTCCAGTTCATTGTT  |
| TCONS_00008078 | <b>Idh1_j2</b>        | TTTCTCTAGGCCTCACACCTCT   | TAGCCTCTGCAGCATCTTTG   |
| TCONS_00083972 | <b>Lrig2_j2_1</b>     | CTGAGGTCTAGCTTCCACCACT   | CAGCCTCCAAGGTGCTTATC   |
| TCONS_00135279 | <b>Lrrc49_j3</b>      | TTCCAGCAGCTGAACAAGAA     | CAAAGGTGATGTCGAGAGGG   |
| TCONS_00136628 | <b>Lrrc49_j5</b>      | CCTGTAGCTGAGTGATCTATTTCC | TCTGAAGGACCGTGTGTTTG   |
| TCONS_00019429 | <b>Nme1_j1_1</b>      | GGGACAGGAAGTCAGGAACA     | CCTGCAGAAACTTCAGACCAA  |
| TCONS_00101566 | <b>Orc5_j1</b>        | GGGGAGTACTGTGTGGATTG     | TTTCTGTAGAACCCCTGCATCT |
| TCONS_00062981 | <b>Paip2_j1</b>       | CACTCGGAGAAGGCTAAAGG     | ATTCCTTTCATTTCCATCCA   |
| TCONS_00051917 | <b>Ppp1r2_j3</b>      | CCTGGGAACCTTTCAGCACTT    | TTGTGATATGGGGTGTGTTGG  |
| TCONS_00083479 | <b>S100a6_j3</b>      | CCTCTCTCGGTCAAATCCAG     | CAGAGCATGGGAAGACCATT   |
| TCONS_00025727 | <b>Sdc1_j1_1</b>      | GTGCTCAGGGGAGGAAG        | CTGATTGCTCTGCGCTTTG    |
| TCONS_00033131 | <b>Serpinb1a_j1_1</b> | TCATAGCAAGGAGGGAGGAA     | GGCAGAAGAAATGCTGAAGG   |
| TCONS_00072605 | <b>Stxbp1_j1</b>      | TTCAGAAGCAGAAGGGACAGA    | AGCATCCTCATGCTTAACTGGT |
| TCONS_00125697 | <b>Vps35_j1</b>       | GCAGAATTTGGTCGTTACCC     | TGGATGGCTTCATCCAAAAG   |
| TCONS_00113864 | <b>Vstm2b_j4</b>      | TGTTGGACCTTCCATCCAGT     | AACACCTTCGCTCCTGCAATC  |
| TCONS_00015939 | <b>Ccl7</b>           | GATCTCTGCCACGCTTCTGT     | ATAGCCTCCTCGACCCACTT   |
| TCONS_00015942 | <b>Ccl8</b>           | ACGCTAGCCTTCACTCCAAA     | TCTGGAAAACACAGCTTCC    |
| TCONS_00001763 | <b>Fcgr2b</b>         | CACGTTTAAGGCCACAGTCA     | GCACCTTAGCGTGATGGTTT   |
| TCONS_00049372 | <b>Pigz_j1</b>        | CCCAGGTGATTTGGGGTAG      | AGAGGTGAGCAGTGGGAAGA   |
| TCONS_00016770 | <b>Canx</b>           | TTTTGCTGACTCTTTGACAGA    | TACAAGTCCTTATCCCTGGA   |
| TCONS_00087868 | <b>Psmb2</b>          | TATGAATTGTCTCCACAGCAG    | AGAGTCAGAAAGGCACCATAGC |
