# Supplementary material
Source: PubMed Central journal article supplement (PMC5864114)
Supplement: NIHMS942947-supplement-Supp_TableS6.pdf [file NIHMS942947-supplement-Supp_TableS6.pdf]

**Table S6:**

|           |             | # Reads processed | # Reads with at least one reported alignment | % of aligned reads |
|-----------|-------------|-------------------|----------------------------------------------|--------------------|
| Control_1 | LEFT READS  | 87466040          | 60994426                                     | 69.73              |
|           | RIGHT READS | 87443871          | 60681976                                     | 69.4               |
| Control_2 | LEFT READS  | 81367277          | 57283495                                     | 70.4               |
|           | RIGHT READS | 81346644          | 57023919                                     | 70.1               |
| Control_3 | LEFT READS  | 84402812          | 59304391                                     | 70.26              |
|           | RIGHT READS | 84381581          | 59052437                                     | 69.98              |
| Crushed_1 | LEFT READS  | 79651252          | 55379979                                     | 69.53              |
|           | RIGHT READS | 79630858          | 55085759                                     | 69.18              |
| Crushed_2 | LEFT READS  | 69627846          | 48633697                                     | 69.85              |
|           | RIGHT READS | 69610089          | 48400746                                     | 69.53              |
| Crushed_3 | LEFT READS  | 75510887          | 53015007                                     | 70.21              |
|           | RIGHT READS | 75491779          | 52764970                                     | 69.89              |
| AVERAGE   |             | 79660911.33       | 55635066.83                                  | 69.83833333        |
