# Supplementary material
Source: PubMed Central journal article supplement (PMC5864114)
Supplement: NIHMS942947-supplement-Supp_TableS7.pdf [file NIHMS942947-supplement-Supp_TableS7.pdf]

Table S7

| GENE NAME        | Controls FPKM | Crushed FPKM | LOG2(Fold Change) | p-value   | q-value   |
|------------------|---------------|--------------|-------------------|-----------|-----------|
| Gm1992           | 0.558127      | 0.544469     | -0.0357435        | 0.957902  | 0.987996  |
| XLOC_000002      | 0.0502667     | 0.0858892    | 0.772872          | 0.604125  | 1         |
| Lypla1           | 17.6392       | 15.8349      | -0.155679         | 0.137924  | 0.461744  |
| Atp6v1h_j1       | 0.106052      | 0.264255     | 0                 | 1         | 1         |
| Atp6v1h_j4       | 6.45408       | 9.63924      | 0                 | 1         | 1         |
| Oprk1_j1         | 0.204996      | 0.109146     | -0.909345         | 0.106346  | 0.404885  |
| Rb1cc1_j1        | 0.492955      | 0.467505     | -0.0764767        | 0.761553  | 0.917949  |
| Rb1cc1_j3        | 0.909516      | 0.89824      | -0.0179977        | 0.960803  | 0.988902  |
| Rb1cc1_j4        | 5.03239       | 5.34458      | 0.0868331         | 0.575163  | 0.828142  |
| Pcmt1            | 8.70588       | 5.82132      | 0                 | 1         | 1         |
| Pcmt1            | 1.42118       | 1.36635      | 0                 | 1         | 1         |
| Pcmt1_j4         | 5.34124       | 3.85216      | 0                 | 1         | 1         |
| Rrs1             | 7.08529       | 7.97219      | 0.17015           | 0.183275  | 0.523894  |
| Adhfe1_j2        | 0.130717      | 0.0353565    | -1.88639          | 0.301039  | 1         |
| Sgk3             | 1.60861       | 1.30541      | 0                 | 1         | 1         |
| Sgk3             | 0.270825      | 0.111522     | 0                 | 1         | 1         |
| 6030422M02Rik_j1 | 0.174159      | 0.121386     | -0.52081          | 0.470123  | 0.768035  |
| 6030422M02Rik_j6 | 0.204422      | 0.0954998    | -1.09798          | 0.46909   | 0.767366  |
| Prex2            | 0.287346      | 0.316591     | 0.139832          | 0.600872  | 0.841981  |
| A830018L16Rik_j2 | 2.94628       | 3.3443       | 0.182813          | 0.349599  | 0.687253  |
| A830018L16Rik_j6 | 6.17182       | 5.53846      | -0.156211         | 0.298836  | 0.645614  |
| A830018L16Rik_j3 | 0.793702      | 0.206613     | -1.94167          | 0.0013866 | 0.0185879 |
| XLOC_000017      | 0.0842902     | 0.0668047    | -0.335416         | 0.723214  | 1         |
| Sulf1            | 0.378577      | 0.492729     | 0                 | 1         | 1         |
| Sulf1_j4         | 0.39701       | 0.879039     | 0                 | 1         | 1         |
| AK080352_j1      | 0.478771      | 0.170652     | -1.48828          | 5.23E-05  | 0.0012399 |
| Kcnb2_j2         | 0.647507      | 0.621287     | -0.0596368        | 0.804416  | 0.935166  |
| Kcnb2_j1         | 0.121025      | 0.100995     | -0.261019         | 0.65192   | 1         |
| Terf1_j1         | 1.74988       | 1.50735      | -0.215238         | 0.229169  | 0.576252  |
| Terf1            | 0.320481      | 0.363546     | 0.181898          | 0.416012  | 0.733677  |
| Rdh10            | 1.41933       | 1.73437      | 0.289208          | 0.0360775 | 0.209687  |
| Tmem70           | 19.3641       | 17.9458      | -0.109737         | 0.329755  | 0.671845  |
| Ly96_j2          | 0.0720634     | 0.210821     | 1.54868           | 0.40616   | 0.727665  |
| Ly96             | 0.890754      | 0.659127     | -0.43447          | 0.358806  | 0.694085  |
| XLOC_000028      | 0.0874868     | 0.0340957    | 0                 | 1         | 1         |
| Gdap1            | 23.1106       | 20.2069      | 0                 | 1         | 1         |
| Crispld1         | 0.327659      | 0.142979     | -1.1964           | 0.0105618 | 0.0889962 |
| Crispld1_j2      | 0.756604      | 0.642019     | -0.236922         | 0.431946  | 0.74396   |
| Paqr8            | 1.5233        | 1.29022      | 0                 | 1         | 1         |
| Efhc1            | 1.15572       | 1.14813      | -0.00950668       | 0.9661    | 0.990307  |
| XLOC_000032      | 0.066711      | 0.0531488    | -0.327887         | 0.814824  | 1         |
| Tmem14a          | 10.2429       | 7.19624      | 0                 | 1         | 1         |
| Tmem14a_j2       | 4.94492       | 5.24926      | 0                 | 1         | 1         |

|                  |           |           |           |           |           |
|------------------|-----------|-----------|-----------|-----------|-----------|
| Lmbrd1           | 8.47003   | 6.36815   | 0         | 1         | 1         |
| Lmbrd1_j1        | 0.160272  | 0.0253275 | 0         | 1         | 1         |
| Gm9884           | 0.0991393 | 0.0386423 | -1.35928  | 0.400513  | 1         |
| AK188812_j1      | 7.9365    | 7.39561   | -0.101833 | 0.53805   | 0.807846  |
| Khdrbs2_j3       | 0.352038  | 0.664544  | 0.916632  | 0.0393505 | 0.221621  |
| Khdrbs2          | 1.05354   | 1.12943   | 0.100347  | 0.720766  | 0.900079  |
| XLOC_000042      | 0.220991  | 0.0860806 | -1.36023  | 0.316621  | 0.660102  |
| Rab23            | 0.619713  | 0.599505  | 0         | 1         | 1         |
| Rab23_j3         | 1.99442   | 0.451092  | 0         | 1         | 1         |
| Dst_j11          | 1.64456   | 1.34475   | 0         | 1         | 1         |
| Dst_j12          | 0.26818   | 0.208633  | 0         | 1         | 1         |
| Imp4             | 1.85537   | 1.95977   | 0         | 1         | 1         |
| Imp4_j1          | 0.954465  | 1.23624   | 0         | 1         | 1         |
| Fam123c          | 4.00872   | 2.59557   | 0         | 1         | 1         |
| Fam123c_j1       | 1.71454   | 0.770776  | 0         | 1         | 1         |
| mKIAA1112_j2     | 2.39063   | 1.7406    | 0         | 1         | 1         |
| Plekhb2          | 65.6393   | 58.4759   | -0.166716 | 0.0556939 | 0.275839  |
| Hs6st1           | 16.4785   | 15.4744   | 0         | 1         | 1         |
| Hs6st1_j3        | 0.724158  | 0.106411  | 0         | 1         | 1         |
| Arid5a           | 1.14986   | 1.84353   | 0         | 1         | 1         |
| Arid5a           | 0.0427709 | 0.189303  | 0         | 1         | 1         |
| Arid5a           | 0.237484  | 0.241027  | 0         | 1         | 1         |
| Cnm4             | 3.14325   | 2.47766   | 0         | 1         | 1         |
| Cnm3             | 2.22962   | 2.03198   | -0.133909 | 0.448837  | 0.755217  |
| Cox5b_j4         | 1.69566   | 1.22273   | -0.471742 | 0.200741  | 0.544177  |
| Cox5b            | 8.56391   | 7.52151   | -0.187249 | 0.322266  | 0.665214  |
| Vwa3b_j1         | 0.195484  | 0.076625  | -1.35117  | 0.173222  | 0.510867  |
| 4921511C04Rik_j1 | 0.0878708 | 0.107275  | 0.28786   | 0.671439  | 1         |
| Inpp4a_j3        | 10.0996   | 9.31263   | 0         | 1         | 1         |
| Unc50            | 22.9511   | 22.734    | 0         | 1         | 1         |
| Unc50            | 5.65971   | 5.90783   | 0         | 1         | 1         |
| Lipt1            | 0.439331  | 0.392233  | 0         | 1         | 1         |
| Mrpl30           | 1.88657   | 2.02366   | 0         | 1         | 1         |
| Mrpl30_j1        | 1.51024   | 1.43302   | 0         | 1         | 1         |
| Mrpl30_j2        | 17.2671   | 16.3031   | 0         | 1         | 1         |
| XLOC_000063      | 0.186584  | 0.185982  | 0         | 1         | 1         |
| Eif5b            | 3.36855   | 3.60191   | 0.0966353 | 0.398855  | 0.722631  |
| Nms_j1           | 0.0818188 | 0.168905  | 1.0457    | 0.370367  | 0.703609  |
| Pdcl3            | 16.5646   | 20.5554   | 0.311414  | 0.005685  | 0.0560441 |
| Npas2_j3         | 0.0905741 | 0.154     | 0.765763  | 0.283065  | 1         |
| Rpl31_j8         | 3.32676   | 3.98604   | 0.260842  | 0.190121  | 0.531948  |
| D1Bwg0212e       | 8.15962   | 8.34412   | 0.0322591 | 0.773418  | 0.923145  |
| Map4k4           | 1.31622   | 1.53052   | 0.217626  | 0.201965  | 0.545319  |
| Il1r2_j1         | 0.0792156 | 0.098484  | 0.314106  | 0.793687  | 1         |
| Il1r1            | 0.366993  | 0.396247  | 0         | 1         | 1         |
| Il1r1_j2         | 0.534589  | 0.338032  | 0         | 1         | 1         |
| Il1r1_j3         | 0.519046  | 0.68056   | 0         | 1         | 1         |

|                  |          |            |            |           |           |
|------------------|----------|------------|------------|-----------|-----------|
| Slc9a2           | 0.148958 | 0.094189   | -0.661277  | 0.306106  | 0.651449  |
| Mrps9            | 19.5047  | 18.3634    | -0.0869841 | 0.44965   | 0.755708  |
| Gpr45            | 1.77789  | 1.83163    | 0          | 1         | 1         |
| Al597479         | 1.79135  | 1.59886    | 0          | 1         | 1         |
| Nck2             | 0.575064 | 0.22496    | -1.35405   | 0.0143043 | 0.111143  |
| 1500015O10Rik    | 0.484914 | 0.597589   | 0.301425   | 0.363149  | 0.697221  |
| Tpp2             | 4.05458  | 3.9492     | 0          | 1         | 1         |
| Tpp2             | 8.34017  | 6.82678    | 0          | 1         | 1         |
| Ercc5            | 2.65589  | 1.73277    | 0          | 1         | 1         |
| Gulp1            | 1.72835  | 1.23486    | 0          | 1         | 1         |
| Col3a1           | 7.77452  | 10.4205    | 0          | 1         | 1         |
| Col3a1_j1        | 4.08996  | 4.51005    | 0          | 1         | 1         |
| Wdr75            | 4.6086   | 4.5087     | 0          | 1         | 1         |
| Dnahc7b_j2       | 0.261109 | 0.137742   | -0.922679  | 0.147635  | 0.476304  |
| Dnahc7b_j4       | 0.374223 | 0.158255   | -1.24165   | 0.376496  | 0.708503  |
| XLOC_000092      | 0.162867 | 0.0760767  | -1.09817   | 0.17757   | 0.516957  |
| Tmeff2_j1        | 13.2914  | 12.0889    | 0          | 1         | 1         |
| Tmeff2_j6        | 0.18758  | 0.0386713  | 0          | 1         | 1         |
| Stat1_j1         | 0.479598 | 0.242687   | 0          | 1         | 1         |
| XLOC_000099      | 0.149345 | 0.0697042  | -1.09934   | 0.118152  | 0.427903  |
| Hibch_j1         | 9.37004  | 9.53223    | 0.0247592  | 0.8795    | 0.96152   |
| Hibch            | 5.38246  | 5.0193     | -0.100781  | 0.350345  | 0.687781  |
| Mstn             | 0.307525 | 0.565031   | 0.877628   | 0.0044308 | 0.0464215 |
| Ormdl1           | 6.13174  | 6.71992    | 0.132149   | 0.351916  | 0.689084  |
| Osgpl1           | 3.70039  | 2.76411    | -0.420864  | 0.0308495 | 0.189256  |
| Coq10b           | 1.76964  | 1.98227    | 0.163698   | 0.393816  | 0.719653  |
| Hspe1            | 0.317189 | 0.366356   | 0.207901   | 0.55121   | 0.815748  |
| Mobkl3           | 30.0209  | 31.8591    | 0.0857417  | 0.351036  | 0.688205  |
| Gm8292           | 16.6891  | 23.4074    | 0.488061   | 0.0013065 | 0.0177042 |
| Plcl1            | 2.02796  | 1.37515    | -0.560444  | 0.0003572 | 0.00615   |
| XLOC_000111      | 21.0043  | 30.9459    | 0.559065   | 0.0115991 | 0.095653  |
| 1700066M21Rik    | 6.49974  | 3.92283    | 0          | 1         | 1         |
| 1700066M21Rik_j3 | 2.63979  | 1.97935    | 0          | 1         | 1         |
| Spats2l_j3       | 1.51007  | 0.943743   | -0.678145  | 0.0681868 | 0.312593  |
| Spats2l_j5       | 2.24143  | 1.72022    | -0.381827  | 0.165808  | 0.502443  |
| Spats2l          | 1.94608  | 2.05624    | 0.0794408  | 0.759005  | 0.917041  |
| Sgol2            | 0.142664 | 0.29246    | 1.03561    | 0.0216013 | 0.148653  |
| Sgol2_j1         | 0.465264 | 0.264596   | -0.81426   | 0.0192018 | 0.137057  |
| Aox1             | 6.88904  | 5.41373    | -0.347679  | 0.0044772 | 0.046737  |
| Aox1_j1          | 0.542254 | 0.281066   | -0.948059  | 0.0302635 | 0.186814  |
| Aox1_j3          | 1.66587  | 2.95247    | 0.825641   | 6.81E-05  | 0.001552  |
| Aox4_j1          | 2.17035  | 1.24829    | -0.797974  | 2.77E-05  | 0.0007211 |
| Bzw1             | 0.322109 | 0.501807   | 0.639586   | 0.0395674 | 0.222296  |
| Nif3l1           | 0.588365 | 0.389695   | 0          | 1         | 1         |
| Nif3l1_j2        | 3.08576  | 3.44237    | 0          | 1         | 1         |
| AK053027_j2      | 0.107906 | 0.0783016  | -0.462662  | 0.511958  | 1         |
| AK053027_j3      | 0.178267 | 0.00302111 | -5.88282   | 0.341755  | 0.681595  |

|             |           |                 |             |           |           |
|-------------|-----------|-----------------|-------------|-----------|-----------|
| Ndufb3      | 34.1183   | 29.3537         | -0.217005   | 0.0675137 | 0.310923  |
| Cflar_j2    | 0.0950415 | 0.0125737       | -2.91814    | 0.209123  | 1         |
| Casp8_j1    | 0.55693   | 0.566355        | 0.0242124   | 0.953742  | 0.98654   |
| Stradb      | 2.32095   | 2.25975         | -0.0385506  | 0.861469  | 0.956186  |
| PAPK-A      | 4.02065   | 3.97898         | -0.0150328  | 0.931657  | 0.979265  |
| Cdk15_j1    | 0.454197  | 0.518288        | 0.190434    | 0.731665  | 0.905112  |
| Cdk15_j3    | 0.671854  | 0.352235        | -0.93161    | 0.127672  | 0.445344  |
| Cdk15       | 1.60265   | 1.70521         | 0.0894893   | 0.775899  | 0.924081  |
| Cdk15_j8    | 1.32565   | 1.37615         | 0.053948    | 0.884773  | 0.963475  |
| Nop58       | 2.85651   | 3.02642         | 0.0833578   | 0.456017  | 0.759645  |
| Bmpr2_j2    | 3.24728   | 2.87433         | -0.176006   | 0.144027  | 0.471055  |
| Bmpr2       | 4.10505   | 3.18397         | -0.366574   | 0.0008667 | 0.0127466 |
| Fam117b     | 7.28393   | 5.84454         | 0           | 1         | 1         |
| Fam117b_j1  | 0.955064  | 0.57264         | 0           | 1         | 1         |
| Fam117b_j2  | 1.57062   | 2.17402         | 0           | 1         | 1         |
| Carf        | 0.368444  | 0.270813        | 0           | 1         | 1         |
| Carf_j1     | 0.489195  | 0.457521        | 0           | 1         | 1         |
| Cyp20a1_j1  | 0.151433  | 0.128372        | -0.238346   | 0.797779  | 0.932828  |
| Cyp20a1     | 6.43205   | 6.9387          | 0.109386    | 0.424478  | 0.739907  |
| Abi2_j5     | 0.406835  | 0.295922        | 0           | 1         | 1         |
| Abi2_j7     | 0.256787  | 0.210799        | 0           | 1         | 1         |
| Pard3b_j1   | 0.113832  | 0.0863557       | -0.398538   | 0.70648   | 1         |
| Nrp2        | 1.62019   | 2.28672         | 0           | 1         | 1         |
| Nrp2        | 0.725743  | 0.633094        | 0           | 1         | 1         |
| Nrp2_j1     | 1.69679   | 2.59726         | 0           | 1         | 1         |
| Eef1b2      | 0.60092   | 0.55975         | 0           | 1         | 1         |
| Eef1b2_j4   | 1.433     | 1.4677          | 0           | 1         | 1         |
| Adam23      | 49.0857   | 38.095          | 0           | 1         | 1         |
| Adam23_j1   | 12.7948   | 10.3134         | 0           | 1         | 1         |
| Fastkd2     | 4.17165   | 3.67229         | -0.183938   | 0.168484  | 0.505081  |
| Creb1       | 1.92523   | 2.3827          | 0           | 1         | 1         |
| Creb1       | 0.543207  | 0.502075        | 0           | 1         | 1         |
| Creb1_j3    | 0.294013  | 0.117314        | 0           | 1         | 1         |
| Pikfyve_j5  | 0.188579  | 0.15808         | -0.254519   | 0.518573  | 0.796493  |
| Pikfyve_j7  | 0.874682  | 0.821052        | -0.0912858  | 0.63397   | 0.858036  |
| Pikfyve_j11 | 1.8943    | 2.5164          | 0.409691    | 0.0179342 | 0.130623  |
| Pth2r_j1    | 0.119822  | 0 -1.79769e+308 |             | 0.0408962 | 1         |
| Mtap2_j1    | 0.576524  | 0 -1.79769e+308 |             | 9.00E-21  | 2.56E-18  |
| Mtap2_j6    | 0.327304  | 0.113786        | -1.52431    | 0.0030156 | 0.0345595 |
| Unc80_j1    | 2.82214   | 1.48174         | 0           | 1         | 1         |
| Rpe         | 0.728074  | 0.723152        | -0.00978635 | 0.961818  | 0.989224  |
| Vwc2l       | 1.34997   | 0.90661         | -0.574378   | 0.0092526 | 0.0808882 |
| Atic        | 12.1746   | 11.9814         | 0           | 1         | 1         |
| Atic_j2     | 10.6154   | 10.3587         | 0           | 1         | 1         |
| AK044410    | 0.176221  | 0.188602        | 0.0979594   | 0.863929  | 0.956651  |
| Tmem169_j1  | 2.24576   | 1.72999         | 0           | 1         | 1         |
| Tmem169     | 3.38666   | 3.23862         | 0           | 1         | 1         |



|                  |           |                       |            |           |           |
|------------------|-----------|-----------------------|------------|-----------|-----------|
| Xrcc5            | 9.34519   | 7.95048               | -0.233182  | 0.0646675 | 0.30233   |
| Xrcc5_j4         | 2.68496   | 4.02458               | 0.583935   | 0.0495143 | 0.256816  |
| Smarcal1_j2      | 0.0825583 | 0 -1.79769e+308       |            | 0.0001344 | 1         |
| Smarcal1         | 6.55919   | 7.95032               | 0.277494   | 0.0075572 | 0.0697845 |
| Igfbp2           | 2.81598   | 2.60194               | -0.114047  | 0.627219  | 0.854539  |
| Igfbp2_j3        | 3.39797   | 1.36984               | -1.31067   | 0.0007436 | 0.0112887 |
| Arpc2            | 22.8756   | 29.3555               | 0.359826   | 0.0021705 | 0.026614  |
| Arpc2            | 83.0415   | 106.504               | 0.359002   | 4.77E-05  | 0.0011491 |
| Gm216_j1         | 0.15418   | 0 -1.79769e+308       |            | 0.0100904 | 0.086081  |
| Gm216_j5         | 0.0567082 | 0.00730397            | -2.9568    | 0.437479  | 1         |
| Gm216_j6         | 0.158019  | 0.0731789             | -1.1106    | 0.156779  | 0.490414  |
| Slc11a1          | 0         | 0.485285 1.79769e+308 |            | 5.04E-06  | 0.0001704 |
| Slc11a1_j6       | 0.168582  | 0.215004              | 0.350915   | 0.613911  | 0.847685  |
| Slc11a1_j7       | 0.525086  | 0.788392              | 0.586359   | 0.340277  | 0.680373  |
| Ctdsp1           | 4.27978   | 4.59901               | 0          | 1         | 1         |
| Rqcd1            | 6.55747   | 3.68478               | 0          | 1         | 1         |
| Plcd4_j3         | 2.538     | 1.49122               | 0          | 1         | 1         |
| Stk36_j1         | 0.0892871 | 0 -1.79769e+308       |            | 0.0001969 | 1         |
| Ttll4_j4         | 1.05826   | 1.09575               | 0.0502227  | 0.818996  | 0.941335  |
| Cyp27a1_j2       | 0.301156  | 0.369445              | 0.294849   | 0.524245  | 0.799783  |
| Cyp27a1_j5       | 0.261869  | 0.185474              | -0.497628  | 0.57071   | 0.826452  |
| Cyp27a1_j6       | 0.689077  | 0.845521              | 0.295177   | 0.59014   | 0.836402  |
| Wnt6             | 4.86628   | 4.49742               | -0.113722  | 0.489361  | 0.779561  |
| Fam134a          | 7.24572   | 7.13889               | -0.0214294 | 0.848934  | 0.952186  |
| Zfand2b          | 1.78015   | 1.86805               | 0.069533   | 0.819739  | 0.941588  |
| Zfand2b_j1       | 1.56216   | 1.43178               | -0.125725  | 0.767219  | 0.920598  |
| Dnajb2           | 17.0568   | 16.4111               | -0.0556724 | 0.641172  | 0.861609  |
| Des              | 0.662492  | 0.820111              | 0.307915   | 0.247159  | 0.594674  |
| Speg_j8          | 0.049971  | 0.0463503             | -0.108514  | 0.873543  | 1         |
| Gmppa_j1         | 0.424513  | 0.612378              | 0          | 1         | 1         |
| Gmppa            | 1.05218   | 1.91476               | 0          | 1         | 1         |
| Gmppa            | 7.39472   | 8.37075               | 0          | 1         | 1         |
| Stk11ip          | 7.02467   | 7.86556               | 0.163118   | 0.150048  | 0.479926  |
| Stk11ip          | 0.546748  | 0.317437              | -0.784405  | 0.0769156 | 0.335371  |
| Slc4a3_j6        | 0.76004   | 0.883682              | 0          | 1         | 1         |
| Slc4a3_j4        | 0.146045  | 0.103056              | 0          | 1         | 1         |
| XLOC_000190      | 0.0813041 | 0.0550458             | -0.562696  | 0.596978  | 1         |
| Mogat1_j3        | 0.388841  | 0.140361              | -1.47004   | 0.185744  | 0.526106  |
| Acsl3            | 10.5147   | 9.79523               | 0          | 1         | 1         |
| Acsl3            | 4.24029   | 4.39864               | 0          | 1         | 1         |
| Kcne4            | 0.464884  | 0.41309               | -0.170414  | 0.638614  | 0.860184  |
| Mrpl44           | 12.7969   | 12.2376               | -0.0644757 | 0.628594  | 0.855514  |
| 9430031J16Rik_j1 | 0.0710109 | 0.146265              | 1.04248    | 0.0994513 | 1         |
| Rhbdd1_j1        | 0.122893  | 0 -1.79769e+308       |            | 0.0004285 | 1         |
| Col4a3_j1        | 0.153871  | 0.0803652             | -0.937076  | 0.175101  | 0.513344  |
| Mff              | 14.6126   | 19.0854               | 0          | 1         | 1         |
| Agfg1_j6         | 18.3596   | 20.1728               | 0.135878   | 0.214071  | 0.559387  |

|               |           |                 |            |           |           |
|---------------|-----------|-----------------|------------|-----------|-----------|
| Gm6374        | 7.97924   | 8.49479         | 0          | 1         | 1         |
| BC100303_j2   | 0.213306  | 0.072487        | -1.55713   | 0.316401  | 0.660085  |
| Sp100_j2      | 0.840749  | 0.721723        | -0.220231  | 0.471764  | 0.769131  |
| Sp100_j8      | 0.171471  | 0.0873519       | -0.973054  | 0.222325  | 0.569453  |
| Cab39         | 13.239    | 11.6622         | 0          | 1         | 1         |
| Cab39_j1      | 40.1266   | 37.4714         | 0          | 1         | 1         |
| Cab39_j3      | 43.6649   | 42.9472         | 0          | 1         | 1         |
| Itm2c         | 129.06    | 109.86          | -0.232376  | 0.0067442 | 0.06395   |
| 4933407L21Rik | 0.204573  | 0.219464        | 0.101365   | 0.868231  | 0.958254  |
| 2810459M11Rik | 0.135148  | 0.078017        | -0.79268   | 0.409624  | 1         |
| Psm1          | 22.0592   | 21.7716         | 0          | 1         | 1         |
| Psm1_j4       | 0.773636  | 3.20127         | 0          | 1         | 1         |
| Armc9_j1      | 0.178377  | 0.024821        | -2.84529   | 0.052384  | 0.265773  |
| Armc9_j3      | 0.115575  | 0.277873        | 1.2656     | 0.025464  | 0.166421  |
| Armc9         | 0.515444  | 0.59195         | 0.19966    | 0.437578  | 0.747793  |
| Armc9_j4      | 0.0996125 | 0.041598        | -1.25981   | 0.364141  | 1         |
| XLOC_000215   | 0.0968762 | 0.0539328       | -0.84498   | 0.419778  | 1         |
| Ptma_j4       | 0.19828   | 0 -1.79769e+308 | 0.0017658  | 0.0226162 |           |
| Ptma          | 3.66223   | 2.27836         | -0.684726  | 0.0080327 | 0.0727691 |
| Cops7b_j3     | 3.37941   | 3.0741          | 0          | 1         | 1         |
| Dis3l2        | 0.700782  | 0.711883        | 0          | 1         | 1         |
| Dis3l2        | 1.95589   | 1.97516         | 0          | 1         | 1         |
| Eif4e2        | 5.75681   | 6.71131         | 0.221324   | 0.0951343 | 0.380733  |
| Eif4e2        | 14.7495   | 18.0711         | 0.293017   | 0.0227353 | 0.153956  |
| Eif4e2_j5     | 1.42189   | 2.57962         | 0.859346   | 2.63E-05  | 0.0006926 |
| Efh1          | 4.42281   | 3.94123         | -0.166314  | 0.321763  | 0.664856  |
| Neu2          | 0.0992366 | 0.0735119       | -0.432896  | 0.674034  | 1         |
| Atg16l1       | 7.30322   | 7.26437         | 0          | 1         | 1         |
| Atg16l1       | 7.37421   | 7.48779         | 0          | 1         | 1         |
| Dgk1          | 3.70597   | 4.22631         | 0.189549   | 0.0959963 | 0.382589  |
| Dgk1_j1       | 0.645772  | 0.50607         | -0.351687  | 0.334575  | 0.675359  |
| Ugt1a6a_j1    | 3.84537   | 4.23067         | 0.137764   | 0.541885  | 0.809832  |
| Ugt1a6a       | 8.85684   | 7.17682         | -0.303447  | 0.0226296 | 0.153539  |
| Trpm8_j3      | 5.04022   | 3.75434         | 0          | 1         | 1         |
| Trpm8_j1      | 3.20488   | 3.05484         | 0          | 1         | 1         |
| Trpm8_j5      | 0.102328  | 0               | 0          | 1         | 1         |
| Sh3bp4        | 3.99318   | 4.74532         | 0          | 1         | 1         |
| Agap1         | 1.44625   | 1.3778          | 0          | 1         | 1         |
| Agap1_j4      | 0.667831  | 0.507084        | 0          | 1         | 1         |
| Agap1_j7      | 0.772771  | 0.744161        | 0          | 1         | 1         |
| Cxcr7         | 3.28009   | 3.22248         | -0.0255661 | 0.879348  | 0.961511  |
| Cops8         | 44.0194   | 43.7052         | -0.0103336 | 0.91006   | 0.971581  |
| Lrrfip1_j1    | 3.85056   | 3.55067         | 0          | 1         | 1         |
| Lrrfip1_j2    | 2.14398   | 2.13017         | 0          | 1         | 1         |
| Ramp1         | 0.581993  | 0.595421        | 0.0329068  | 0.935045  | 0.980162  |
| Ube2f_j2      | 0.11364   | 0.0571763       | -0.990982  | 0.042229  | 1         |
| Ube2f         | 1.7984    | 1.57797         | -0.188638  | 0.22758   | 0.574755  |

|               |           |                 |             |           |           |
|---------------|-----------|-----------------|-------------|-----------|-----------|
| Scly          | 6.332     | 6.48919         | 0.0353784   | 0.791691  | 0.930476  |
| Traf3ip1_j1   | 0.374093  | 0.45392         | 0.279041    | 0.474422  | 0.770681  |
| Traf3ip1      | 2.13721   | 1.89621         | -0.172614   | 0.341133  | 0.681074  |
| mKIAA1146     | 1.25081   | 0.937325        | -0.416241   | 0.0555676 | 0.275486  |
| Asb1          | 1.44938   | 1.06858         | -0.439739   | 0.0322073 | 0.194646  |
| Gpc1          | 26.5332   | 26.8585         | 0           | 1         | 1         |
| Dusp28        | 5.43546   | 5.22089         | 0           | 1         | 1         |
| Rnpepl1       | 4.02763   | 3.2039          | 0           | 1         | 1         |
| Capn10_j2     | 6.05945   | 4.74013         | -0.354258   | 0.112908  | 0.418262  |
| Gpr35_j3      | 0.70019   | 0.653259        | 0           | 1         | 1         |
| Gpr35         | 0.522611  | 0.041206        | 0           | 1         | 1         |
| Sned1_j4      | 0.749219  | 0.846096        | 0.175434    | 0.440634  | 0.749739  |
| Sned1_j5      | 0.35676   | 1.96709         | 2.46304     | 0         | 0         |
| Ppp1r7_j1     | 6.58723   | 9.00944         | 0           | 1         | 1         |
| Ppp1r7        | 6.5565    | 2.71728         | 0           | 1         | 1         |
| Ano7_j1       | 0.572315  | 2.1668          | 1.92069     | 3.47E-13  | 5.39E-11  |
| Sept2         | 19.1248   | 21.1674         | 0           | 1         | 1         |
| Farp2         | 4.13934   | 4.13046         | 0           | 1         | 1         |
| Bok           | 3.75557   | 3.51565         | -0.0952388  | 0.582741  | 0.832835  |
| Atg4b         | 15.7905   | 13.3306         | 0           | 1         | 1         |
| Atg4b_j3      | 3.40065   | 5.18549         | 0           | 1         | 1         |
| Ing5          | 1.27652   | 1.45224         | 0.186055    | 0.327575  | 0.670398  |
| D2hgdh_j4     | 0.584171  | 0.277744        | -1.07264    | 0.213789  | 0.558982  |
| D2hgdh_j3     | 0.483494  | 0.420561        | -0.201181   | 0.695725  | 0.887811  |
| D2hgdh_j7     | 0.506558  | 0.40727         | -0.314743   | 0.65397   | 0.86761   |
| D2hgdh_j8     | 0.775165  | 0.839038        | 0.114233    | 0.803936  | 0.935008  |
| Fam174a       | 33.2777   | 31.9207         | -0.0600659  | 0.552054  | 0.816165  |
| Gm15427       | 229.349   | 260.337         | 0.182837    | 0.0365844 | 0.211473  |
| Gm3555        | 5.88282   | 4.7435          | -0.310557   | 0.0520886 | 0.264868  |
| Cntnap5b_j1   | 0.145395  | 0.0471158       | -1.62569    | 0.18285   | 0.523288  |
| Cdh20         | 1.21099   | 0.848505        | -0.513194   | 0.0190751 | 0.136374  |
| 2310035C23Rik | 2.74147   | 2.45233         | -0.160796   | 0.381234  | 0.711819  |
| 2310035C23Rik | 3.23656   | 2.89594         | -0.160433   | 0.353298  | 0.689807  |
| Tnfrsf11a_j1  | 0.140698  | 0.0857865       | 0           | 1         | 1         |
| Tnfrsf11a     | 0.731904  | 0.51398         | 0           | 1         | 1         |
| Zcchc2_j4     | 0.322742  | 0.320874        | -0.00837764 | 0.982466  | 0.994652  |
| Zcchc2        | 0.678295  | 0.961691        | 0.50366     | 0.0387438 | 0.219343  |
| XLOC_000275   | 0.143391  | 0.0643792       | -1.15529    | 0.397035  | 0.721465  |
| Phlpp1        | 3.38813   | 2.78447         | -0.283087   | 0.0339997 | 0.201897  |
| Serpib5       | 0.214161  | 0 -1.79769e+308 |             | 3.04E-06  | 0.0001101 |
| Serpib5_j5    | 0.0435678 | 0.0628419       | 0.528465    | 0.673296  | 1         |
| Serpib5_j8    | 0.107647  | 0 -1.79769e+308 |             | 0.0016033 | 1         |
| Serpib8       | 2.84856   | 2.97925         | 0.0647175   | 0.612818  | 0.847359  |
| Cntnap5a_j1   | 0.595444  | 0.290207        | -1.03688    | 9.08E-05  | 0.0019764 |
| Cntnap5a_j2   | 0.56846   | 0.00112165      | -8.98529    | 0.0091855 | 0.080475  |
| Mki67ip       | 10.1898   | 10.8211         | 0.0867153   | 0.46328   | 0.763732  |
| Clasp1_j2     | 4.90799   | 4.35101         | 0           | 1         | 1         |

|                  |           |                 |            |           |           |
|------------------|-----------|-----------------|------------|-----------|-----------|
| Clasp1_j5        | 10.7205   | 9.44509         | 0          | 1         | 1         |
| En1              | 0.105362  | 0.55444         | 2.39567    | 1.59E-05  | 0.0004598 |
| Ccdc93           | 2.95433   | 2.76482         | 0          | 1         | 1         |
| Ccdc93           | 0.296362  | 0.117228        | 0          | 1         | 1         |
| XLOC_000292      | 0.245881  | 0.307198        | 0.321205   | 0.213354  | 0.55853   |
| Slc35f5_j1       | 2.52948   | 1.67971         | 0          | 1         | 1         |
| Slc35f5          | 8.34383   | 8.63022         | 0          | 1         | 1         |
| Slc35f5_j2       | 1.1207    | 2.21867         | 0          | 1         | 1         |
| Gpr39_j1         | 0.907275  | 1.05458         | 0.217059   | 0.609503  | 0.846216  |
| Mgat5            | 0.35193   | 0.282909        | 0          | 1         | 1         |
| XLOC_000298      | 0.166411  | 0.0622735       | 0          | 1         | 1         |
| Ccnt2            | 3.32952   | 3.07663         | 0          | 1         | 1         |
| Ccnt2            | 2.12707   | 1.59937         | 0          | 1         | 1         |
| Ccnt2_j1         | 0.0994273 | 0.038144        | 0          | 1         | 1         |
| Ccnt2_j2         | 0.549549  | 1.16856         | 0          | 1         | 1         |
| Rab3gap1         | 7.6401    | 9.24653         | 0          | 1         | 1         |
| Rab3gap1_j1      | 6.57352   | 4.18215         | 0          | 1         | 1         |
| Rpl28-ps1        | 235.59    | 260.319         | 0.143999   | 0.104014  | 0.399912  |
| R3hdm1_j2        | 7.85453   | 7.61166         | 0          | 1         | 1         |
| Ubxn4            | 12.11     | 12.5614         | 0          | 1         | 1         |
| Ubxn4_j3         | 8.32533   | 9.49265         | 0          | 1         | 1         |
| Yod1             | 1.62686   | 1.46271         | 0          | 1         | 1         |
| 5430435G22Rik_j1 | 0.193357  | 0.0834329       | -1.21258   | 0.34488   | 0.684393  |
| Pm20d1           | 0.193248  | 0.13467         | -0.521029  | 0.246602  | 0.594179  |
| Slc41a1          | 1.95947   | 2.04227         | 0          | 1         | 1         |
| Slc41a1_j1       | 1.09935   | 0.995633        | 0          | 1         | 1         |
| Slc41a1_j2       | 2.00978   | 2.26876         | 0          | 1         | 1         |
| Rab7l1_j1        | 1.58556   | 1.84588         | 0.219312   | 0.296745  | 0.643452  |
| Nucks1           | 10.2099   | 10.3299         | 0.0168512  | 0.863235  | 0.956634  |
| Nucks1           | 3.12536   | 2.9005          | -0.107721  | 0.466673  | 0.766293  |
| Slc45a3          | 10.4238   | 9.45634         | -0.140522  | 0.20042   | 0.543772  |
| Elk4             | 0.237456  | 0.267787        | 0          | 1         | 1         |
| Lemd1            | 0.0424335 | 0.205644        | 2.27687    | 0.0008905 | 0.0130503 |
| Lemd1_j2         | 0.240675  | 0.0995084       | -1.27419   | 0.0161007 | 0.120889  |
| Lemd1_j5         | 0.0975838 | 0 -1.79769e+308 |            | 5.70E-05  | 1         |
| Klhdc8a          | 6.03747   | 5.03182         | -0.262863  | 0.0605293 | 0.29008   |
| Nuak2            | 0.169648  | 0.228339        | 0.428634   | 0.40455   | 0.726779  |
| Dstyj_j2         | 0.15206   | 0               | 0          | 1         | 1         |
| Rbbp5_j2         | 0.284239  | 0               | 0          | 1         | 1         |
| Rbbp5            | 2.15118   | 2.16272         | 0          | 1         | 1         |
| Rbbp5_j1         | 2.35983   | 2.41798         | 0          | 1         | 1         |
| Rbbp5_j4         | 0.356128  | 0.241509        | 0          | 1         | 1         |
| XLOC_000325      | 0.177596  | 0.0841866       | -1.07694   | 0.174998  | 0.51327   |
| Lrrn2            | 0.42161   | 0.290892        | 0          | 1         | 1         |
| XLOC_000326      | 0.0805971 | 0.0193114       | 0          | 1         | 1         |
| Pik3c2b          | 0.17496   | 0.171927        | -0.0252281 | 0.948873  | 0.985323  |
| Pik3c2b_j5       | 0.167514  | 0.0415077       | -2.01283   | 0.121609  | 0.434204  |

|             |           |                 |            |           |           |
|-------------|-----------|-----------------|------------|-----------|-----------|
| XLOC_000328 | 0.223084  | 0.157862        | -0.498919  | 0.548624  | 0.814261  |
| PPP1r15b    | 0.169076  | 0.20358         | 0.267919   | 0.610742  | 0.846566  |
| PPP1r15b    | 4.669     | 4.76352         | 0.0289131  | 0.806749  | 0.936113  |
| Plekha6_j2  | 21.3577   | 16.6062         | -0.363039  | 5.65E-05  | 0.0013229 |
| Etnk2       | 0.198329  | 0.398417        | 1.00638    | 0.0257195 | 0.167616  |
| Etnk2_j2    | 0.161248  | 0.130199        | -0.308567  | 0.774775  | 0.923737  |
| Fmod        | 0.477118  | 0.230488        | -1.04966   | 0.0086068 | 0.0766592 |
| Chit1_j1    | 0.359274  | 0.361001        | 0.00692023 | 0.989303  | 0.996615  |
| Chi3l1_j1   | 0.321148  | 0.455655        | 0.504704   | 0.325519  | 0.668812  |
| Chi3l1      | 0.243622  | 0.116162        | -1.06851   | 0.222383  | 0.569473  |
| Chi3l1_j3   | 0.494438  | 0.385473        | -0.359162  | 0.497066  | 0.783639  |
| Cyb5r1      | 22.6519   | 28.5256         | 0          | 1         | 1         |
| Cyb5r1_j3   | 3.0364    | 7.17675         | 0          | 1         | 1         |
| Cyb5r1_j4   | 33.1832   | 35.1244         | 0          | 1         | 1         |
| Adipor1     | 54.3839   | 55.5414         | 0.030385   | 0.728643  | 0.903788  |
| Adipor1_j4  | 0.55987   | 0.594157        | 0.0857519  | 0.824411  | 0.943294  |
| Klhl12      | 14.1865   | 13.2397         | -0.0996488 | 0.325681  | 0.668976  |
| Rabif       | 16.8894   | 18.5786         | 0.137525   | 0.160446  | 0.495054  |
| Rabif_j1    | 0.686933  | 0 -1.79769e+308 |            | 9.79E-12  | 1.20E-09  |
| Rabif_j2    | 0.728513  | 0.519346        | -0.48826   | 0.227026  | 0.574212  |
| Kdm5b       | 2.80236   | 1.6836          | 0          | 1         | 1         |
| Syt2_j1     | 19.2445   | 6.82609         | 0          | 1         | 1         |
| Syt2        | 27.3352   | 23.5594         | 0          | 1         | 1         |
| Ube2t_j1    | 0.221576  | 0 -1.79769e+308 |            | 0.007664  | 0.0705035 |
| Ube2t       | 0.570635  | 1.02544         | 0.845609   | 0.0211957 | 0.146549  |
| Arl8a       | 170.972   | 190.386         | 0.155167   | 0.0711059 | 0.320588  |
| Csrp1       | 28.9312   | 33.894          | 0          | 1         | 1         |
| Phlda3      | 16.0004   | 19.9923         | 0.321338   | 0.0024283 | 0.0291734 |
| Tmem9       | 25.6894   | 27.2345         | 0.0842612  | 0.400024  | 0.723563  |
| Tmem9       | 3.8469    | 4.39292         | 0.191483   | 0.350794  | 0.688102  |
| Kif21b      | 0.622513  | 0.341329        | 0          | 1         | 1         |
| Kif21b_j1   | 0.119465  | 0.043982        | 0          | 1         | 1         |
| XLOC_000355 | 0.0859417 | 0.03461         | -1.31217   | 0.34659   | 1         |
| Ddx59       | 1.00294   | 1.06807         | 0.0907619  | 0.70818   | 0.893746  |
| Zfp281      | 1.24968   | 0.340558        | 0          | 1         | 1         |
| Zfp281      | 1.54324   | 0.830334        | 0          | 1         | 1         |
| XLOC_000358 | 0.238229  | 0.0962779       | -1.30707   | 0.26586   | 0.614888  |
| XLOC_000358 | 0.0967037 | 0.026352        | -1.87566   | 0.474895  | 1         |
| XLOC_000358 | 0.472904  | 0.281875        | -0.746492  | 0.28462   | 0.633357  |
| Dennd1b_j2  | 0.123159  | 0 -1.79769e+308 |            | 5.01E-07  | 1         |
| Dennd1b     | 1.16252   | 0.879989        | -0.401703  | 0.0421717 | 0.23207   |
| Dennd1b_j3  | 0.0655702 | 0 -1.79769e+308 |            | 0.0002125 | 1         |
| Zbtb41_j1   | 0.398711  | 1.1272          | 0          | 1         | 1         |
| Zbtb41      | 1.83306   | 1.84775         | 0          | 1         | 1         |
| Kcnt2_j2    | 0.446299  | 0.33545         | -0.41191   | 0.200964  | 0.544315  |
| Kcnt2_j1    | 0.138023  | 0 -1.79769e+308 |            | 1.08E-06  | 4.40E-05  |
| Kcnt2_j9    | 0.0161777 | 0.090426        | 2.48273    | 0.0601101 | 1         |

|                  |           |           |            |           |           |
|------------------|-----------|-----------|------------|-----------|-----------|
| B3galt2          | 1.24484   | 0.61291   | -1.02221   | 1.45E-06  | 5.70E-05  |
| Glrx2            | 8.74897   | 7.38978   | -0.243583  | 0.0361077 | 0.209813  |
| Uchl5_j4         | 3.22732   | 2.59117   | 0          | 1         | 1         |
| Uchl5            | 5.47277   | 3.85821   | 0          | 1         | 1         |
| Fam5c            | 0.478088  | 0.556622  | 0.219422   | 0.526417  | 0.801041  |
| Fam5c_j2         | 0.419695  | 0.0540222 | -2.95772   | 0.0053556 | 0.0534343 |
| Tpr              | 9.69463   | 10.3783   | 0.0983139  | 0.288572  | 0.636306  |
| Ska2l-ps         | 1.95941   | 1.78714   | -0.132765  | 0.713383  | 0.896209  |
| 1190005F20Rik    | 10.5413   | 11.7998   | 0.162715   | 0.149867  | 0.479608  |
| Fam129a          | 3.78266   | 3.56839   | 0          | 1         | 1         |
| Niban_j3         | 2.75574   | 3.59171   | 0          | 1         | 1         |
| Edem3_j5         | 2.06316   | 1.27143   | 0          | 1         | 1         |
| Glt25d2          | 7.26417   | 5.18451   | 0          | 1         | 1         |
| Glt25d2_j2       | 1.61235   | 0.190773  | 0          | 1         | 1         |
| XLOC_000377      | 0.114074  | 0.0642292 | 0          | 1         | 1         |
| Arpc5            | 47.6696   | 53.6428   | 0.170313   | 0.0913396 | 0.371464  |
| Nmnat2           | 4.81713   | 4.29134   | -0.166746  | 0.185777  | 0.526138  |
| mKIAA0479_j1     | 9.48404   | 7.8177    | -0.278756  | 0.135091  | 0.457301  |
| 1700012A16Rik_j1 | 0.201885  | 0.172073  | 0          | 1         | 1         |
| Rgs8             | 1.15239   | 0.60153   | 0          | 1         | 1         |
| Rgs8_j8          | 0.149511  | 0.0735705 | 0          | 1         | 1         |
| XLOC_000383      | 0.0804365 | 0.0768123 | 0          | 1         | 1         |
| Rgs16            | 0.770298  | 0.907607  | 0.23665    | 0.337506  | 0.677992  |
| Rnasel_j8        | 0.290375  | 0.136009  | 0          | 1         | 1         |
| Glul             | 76.1418   | 86.3672   | 0          | 1         | 1         |
| XLOC_000387      | 0.117259  | 0.0555976 | -1.07661   | 0.325843  | 1         |
| Stx6             | 8.76029   | 9.7637    | 0.156449   | 0.138462  | 0.462714  |
| Acbd6            | 1.84904   | 1.79662   | -0.0414903 | 0.891678  | 0.965687  |
| Acbd6            | 11.1508   | 11.4801   | 0.0419894  | 0.734535  | 0.906406  |
| Tor1aip2         | 7.39801   | 7.35245   | 0          | 1         | 1         |
| Tor1aip2_j1      | 1.4731    | 1.37087   | 0          | 1         | 1         |
| Tor1aip2_j2      | 0.710846  | 0.0267777 | 0          | 1         | 1         |
| Gm2000           | 154.127   | 214.692   | 0.478151   | 1.82E-07  | 9.08E-06  |
| Abl2             | 2.82655   | 3.07699   | 0.122477   | 0.291245  | 0.638477  |
| XLOC_000397      | 0.348871  | 0.331987  | -0.0715685 | 0.960081  | 0.988634  |
| 2810025M15Rik    | 6.38804   | 8.72154   | 0.449209   | 0.0019599 | 0.024602  |
| BC026585_j3      | 0.371754  | 0.514852  | 0.46981    | 0.374822  | 0.707307  |
| BC026585         | 0.719939  | 0.549451  | -0.389884  | 0.327815  | 0.670398  |
| Sec16b_j1        | 0.117982  | 0.0756598 | -0.640974  | 0.370528  | 1         |
| Astn1            | 6.627     | 5.53449   | -0.259906  | 0.0137263 | 0.107969  |
| Rfwd2_j1         | 0.495448  | 0.0216504 | -4.51627   | 0.143734  | 0.470722  |
| Rfwd2_j6         | 0.27886   | 0.455493  | 0.707889   | 0.478082  | 0.772711  |
| Rfwd2_j10        | 0.297588  | 0.280667  | -0.0844592 | 0.835325  | 0.946983  |
| Rfwd2_j16        | 0.373289  | 0.315675  | -0.241855  | 0.407157  | 0.727764  |
| Tnr_j4           | 0.122006  | 0.0448855 | -1.44263   | 0.0202452 | 1         |
| 4930523C07Rik    | 0.08415   | 0.0593675 | -0.503289  | 0.643575  | 1         |
| Mrps14           | 4.05187   | 3.40931   | 0          | 1         | 1         |

|                  |           |             |               |           |           |
|------------------|-----------|-------------|---------------|-----------|-----------|
| Rc3h1            | 1.69338   | 1.26631     | 0             | 1         | 1         |
| Gas5_j1          | 12.5079   | 18.1671     | 0.538484      | 0.0004159 | 0.0069843 |
| Gas5_j2          | 38.4243   | 42.8365     | 0.156819      | 0.264244  | 0.613183  |
| Ankrd45_j1       | 0.120614  | 0.022158    | 0             | 1         | 1         |
| Pigc             | 0.343949  | 0.27743     | -0.310067     | 0.413917  | 0.732571  |
| Pigc_j1          | 10.614    | 9.91695     | -0.0979961    | 0.492286  | 0.780929  |
| Vamp4            | 2.85796   | 2.88837     | 0             | 1         | 1         |
| Vamp4_j1         | 23.5615   | 21.4644     | 0             | 1         | 1         |
| Vamp4_j3         | 4.08939   | 4.84318     | 0             | 1         | 1         |
| XLOC_000413      | 0.101657  | 0.0574322   | 0             | 1         | 1         |
| Myoc             | 1.16216   | 1.75082     | 0.591228      | 0.003308  | 0.0372361 |
| Kifap3_j3        | 0.52206   | 0.205439    | 0             | 1         | 1         |
| Kifap3_j2        | 38.8057   | 48.3161     | 0             | 1         | 1         |
| Scyl3_j4         | 0.706897  | 0           | 0             | 1         | 1         |
| Scyl3_j7         | 0.800286  | 1.51928     | 0             | 1         | 1         |
| 2810422O20Rik    | 0.816958  | 1.07607     | 0.397432      | 0.231177  | 0.578244  |
| 2810422O20Rik    | 0.99237   | 0.807979    | -0.29656      | 0.386094  | 0.714381  |
| Slc19a2          | 5.28019   | 4.85527     | -0.121037     | 0.371874  | 0.704825  |
| Slc19a2_j1       | 0.439571  | 0           | -1.79769e+308 | 0.0001303 | 0.0026807 |
| 4930455F23Rik    | 5.66488   | 5.70768     | 0             | 1         | 1         |
| Gpr161_j1        | 3.36496   | 2.77604     | 0             | 1         | 1         |
| Gpr161_j2        | 1.09947   | 1.03625     | 0             | 1         | 1         |
| Brp44            | 16.2855   | 15.164      | -0.102932     | 0.319935  | 0.663346  |
| Creg1            | 8.14951   | 7.12007     | -0.194821     | 0.130776  | 0.45023   |
| Ildr2            | 0.231038  | 0.410797    | 0.830295      | 0.0068597 | 0.0648184 |
| Ildr2_j3         | 0.0855668 | 0.0314292   | -1.44494      | 0.116842  | 1         |
| Tada1            | 1.46386   | 1.56295     | 0             | 1         | 1         |
| Tada1_j1         | 3.82709   | 4.26625     | 0             | 1         | 1         |
| Fam78b           | 2.93963   | 3.09632     | 0             | 1         | 1         |
| Fam78b           | 3.66959   | 4.23112     | 0             | 1         | 1         |
| Tmco1            | 16.0064   | 15.1637     | -0.0780309    | 0.497918  | 0.783786  |
| Aldh9a1          | 11.3406   | 11.6783     | 0             | 1         | 1         |
| Aldh9a1_j2       | 2.91435   | 3.07452     | 0             | 1         | 1         |
| Rxrg             | 2.66238   | 2.4347      | 0             | 1         | 1         |
| Rxrg_j1          | 1.34287   | 2.42728     | 0             | 1         | 1         |
| Rxrg_j2          | 0.700212  | 0.000340829 | 0             | 1         | 1         |
| Rxrg             | 0.660241  | 1.17887     | 0             | 1         | 1         |
| Rgs5             | 14.2564   | 10.5232     | 0             | 1         | 1         |
| 1700084C01Rik    | 0.27076   | 0.157799    | -0.77893      | 0.315647  | 0.659655  |
| AK014177         | 0.508588  | 0.558108    | 0             | 1         | 1         |
| AK014177_j1      | 0.187156  | 0.240752    | 0             | 1         | 1         |
| Olfml2b          | 6.76662   | 6.916       | 0.0315018     | 0.784847  | 0.927751  |
| 1700009P17Rik_j4 | 0.626548  | 0.467371    | 0             | 1         | 1         |
| 1700009P17Rik_j3 | 0.146524  | 0.155618    | 0             | 1         | 1         |
| 1700009P17Rik_j1 | 0.64272   | 0.329204    | 0             | 1         | 1         |
| Mpz              | 224.152   | 283.734     | 0             | 1         | 1         |
| Apoa2_j1         | 0.33441   | 0.462767    | 0             | 1         | 1         |

|             |           |                 |            |           |           |
|-------------|-----------|-----------------|------------|-----------|-----------|
| Adamts4     | 0.17194   | 0.0808118       | 0          | 1         | 1         |
| B4galt3     | 6.30582   | 6.72096         | 0.0919835  | 0.416671  | 0.733896  |
| Dedd_j3     | 2.31863   | 2.35582         | 0          | 1         | 1         |
| Pvrl4       | 3.17755   | 3.30237         | 0          | 1         | 1         |
| Pvrl4       | 4.78293   | 2.75136         | 0          | 1         | 1         |
| Arhgap30_j2 | 0.0901766 | 0.0649553       | -0.473305  | 0.762771  | 1         |
| Usf1_j1     | 4.23418   | 3.63541         | 0          | 1         | 1         |
| F11r        | 1.42672   | 1.34717         | 0          | 1         | 1         |
| Refbp2      | 1.90779   | 2.03746         | 0.0948695  | 0.661664  | 0.871766  |
| Cd48        | 0.458145  | 1.0548          | 1.20309    | 0.0009011 | 0.0131748 |
| Cd84_j3     | 0.0941959 | 0.0255264       | -1.88368   | 0.42553   | 1         |
| Copa        | 12.0837   | 10.6075         | 0          | 1         | 1         |
| Copa_j3     | 0.79696   | 0.457152        | 0          | 1         | 1         |
| Pex19       | 28.7721   | 26.5518         | -0.115863  | 0.200683  | 0.544177  |
| Dcaf8       | 10.1088   | 7.47092         | 0          | 1         | 1         |
| Igsf8       | 37.1368   | 38.7562         | 0.0615784  | 0.507267  | 0.789581  |
| Kcnj10      | 16.9465   | 16.4431         | -0.0435027 | 0.631137  | 0.8565    |
| Pigm        | 3.15917   | 3.06746         | -0.0424995 | 0.704016  | 0.891644  |
| Slamf9      | 4.71E-05  | 1.21046         | 14.6488    | 0.966187  | 0.990343  |
| Igsf9_j5    | 0.0681675 | 0 -1.79769e+308 |            | 0.016698  | 1         |
| Igsf9_j10   | 0.166873  | 0.0148084       | -3.49426   | 0.173029  | 0.510725  |
| Tagln2      | 82.4092   | 109.576         | 0.411053   | 4.83E-06  | 0.0001641 |
| Tagln2_j2   | 100.571   | 141.741         | 0.49504    | 7.21E-07  | 3.13E-05  |
| Aim2_j1     | 0.107257  | 0.112867        | 0.0735593  | 0.929742  | 1         |
| Aim2_j7     | 0.137403  | 0 -1.79769e+308 |            | 0.0051253 | 0.051687  |
| Pydc3_j1    | 0.0809665 | 0.131077        | 0.695015   | 0.336723  | 1         |
| Fmn2        | 3.71248   | 3.09745         | -0.261304  | 0.0319505 | 0.193718  |
| Sdccag8     | 2.03679   | 2.25072         | 0          | 1         | 1         |
| Zfp238      | 6.95804   | 7.25489         | 0          | 1         | 1         |
| rp58_j3     | 11.0816   | 7.80223         | 0          | 1         | 1         |
| Pppde1      | 0.684198  | 0.509007        | 0          | 1         | 1         |
| Pppde1_j3   | 0.133972  | 0               | 0          | 1         | 1         |
| Efcab2      | 0.234614  | 0.307414        | 0.389893   | 0.176106  | 0.514722  |
| Efcab2_j6   | 0.306456  | 0.115546        | -1.40721   | 0.0004602 | 0.0075993 |
| Kif26b      | 0.215897  | 0.131836        | 0          | 1         | 1         |
| Cnst_j1     | 0.260482  | 0.175022        | -0.573647  | 0.353932  | 0.690091  |
| Sccpdh      | 13.7112   | 11.1408         | -0.299511  | 0.0193921 | 0.13799   |
| Sccpdh_j1   | 24.6565   | 21.3894         | -0.205073  | 0.106377  | 0.404974  |
| Cdc42bpa_j2 | 4.10027   | 3.08745         | 0          | 1         | 1         |
| Cdc42bpa_j1 | 5.57047   | 5.27199         | 0          | 1         | 1         |
| Cdc42bpa_j4 | 10.3801   | 10.5574         | 0          | 1         | 1         |
| XLOC_000490 | 0.168842  | 0.273973        | 0.698361   | 0.526742  | 0.801217  |
| XLOC_000491 | 0.0493977 | 1.25E-05        | -11.9457   | 0.984562  | 1         |
| XLOC_000491 | 0.189446  | 0.218028        | 0.202725   | 0.597471  | 0.840295  |
| Itpkb       | 1.24418   | 1.11075         | 0          | 1         | 1         |
| Itpkb_j3    | 0.410591  | 0.132116        | 0          | 1         | 1         |
| Itpkb_j7    | 0.214253  | 0.0655866       | 0          | 1         | 1         |



|               |            |             |            |           |           |
|---------------|------------|-------------|------------|-----------|-----------|
| Parp1         | 21.8075    | 23.9659     | 0          | 1         | 1         |
| Parp1_j1      | 0.140283   | 0           | 0          | 1         | 1         |
| Lin9          | 0.596903   | 0.505847    | -0.238795  | 0.434649  | 0.745749  |
| Lin9_j1       | 0.180035   | 0.0650162   | -1.46941   | 0.171819  | 0.50891   |
| Acbd3         | 13.4761    | 12.7342     | -0.0816903 | 0.380902  | 0.711636  |
| BC031781      | 4.95145    | 5.1666      | 0.0613633  | 0.630953  | 0.856499  |
| Pycr2         | 13.5747    | 15.0593     | 0.149728   | 0.206837  | 0.551471  |
| Tmem63a       | 3.71886    | 3.48917     | 0          | 1         | 1         |
| Cnih4_j1      | 0.409427   | 0.25174     | -0.70167   | 0.126867  | 0.443669  |
| Cnih4         | 1.84578    | 1.7649      | -0.0646447 | 0.731467  | 0.904976  |
| A430110L20Rik | 0.175492   | 0.164577    | -0.092648  | 0.859975  | 0.955708  |
| XLOC_000503   | 0.107153   | 0.0575067   | -0.897873  | 0.303932  | 1         |
| Cnih3_j2      | 0.492874   | 0.570501    | 0.211012   | 0.595982  | 0.839157  |
| Cnih3         | 0.498696   | 0.641003    | 0.362169   | 0.228492  | 0.575589  |
| Srp9          | 3.05319    | 3.11252     | 0.0277675  | 0.886052  | 0.963781  |
| Srp9_j1       | 37.6082    | 36.4487     | -0.0451777 | 0.670703  | 0.87546   |
| Trp53bp2      | 2.63006    | 3.23911     | 0.3005     | 0.0303994 | 0.187368  |
| Susd4_j2      | 6.3937     | 5.46478     | 0          | 1         | 1         |
| Susd4_j3      | 12.1114    | 8.21086     | 0          | 1         | 1         |
| Tlr5_j2       | 0.0963625  | 0.0312716   | -1.62362   | 0.227065  | 1         |
| Tlr5_j1       | 0.398599   | 0.17827     | -1.16087   | 0.0273205 | 0.174619  |
| Tlr5_j4       | 0.131729   | 0.000317747 | -8.69548   | 0.688169  | 1         |
| Tlr5_j5       | 0.0632283  | 0.186018    | 1.5568     | 0.0482127 | 0.252646  |
| XLOC_000512   | 0.170646   | 0.106982    | -0.673634  | 0.568623  | 0.825638  |
| XLOC_000512   | 0.0892605  | 0.101076    | 0.179347   | 0.908065  | 1         |
| Dusp10        | 1.37213    | 1.26601     | -0.116131  | 0.525941  | 0.800977  |
| XLOC_000515   | 0.13981    | 0.071152    | -0.974488  | 0.429356  | 0.742659  |
| XLOC_000516   | 0.217263   | 0.203706    | -0.0929536 | 0.856917  | 0.95474   |
| Rab3gap2      | 4.26121    | 5.3411      | 0          | 1         | 1         |
| Eprs_j1       | 0.153581   | 0.170361    | 0          | 1         | 1         |
| Eprs_j5       | 11.2964    | 13.0118     | 0          | 1         | 1         |
| Gpatch2       | 2.48211    | 2.34321     | -0.0830822 | 0.580335  | 0.831506  |
| Esrrg_j2      | 0.491924   | 0.333248    | 0          | 1         | 1         |
| Esrrg_j3      | 3.19984    | 0.624245    | 0          | 1         | 1         |
| Esrrg         | 0.136276   | 0.0815465   | 0          | 1         | 1         |
| Ptpn14_j1     | 0.10893    | 0.068524    | -0.668718  | 0.520057  | 1         |
| Angel2        | 0.00178692 | 0.259048    | 7.1796     | 0.178627  | 0.518168  |
| Nsl1          | 0.488097   | 0.276271    | -0.821085  | 0.0455353 | 0.244264  |
| XLOC_000533   | 0.134399   | 0.0830302   | -0.694817  | 0.510233  | 1         |
| Tmem206       | 1.33786    | 1.76888     | 0.402909   | 0.0010088 | 0.0144113 |
| Ints7         | 3.79151    | 3.31467     | -0.193909  | 0.138275  | 0.462436  |
| Lpgat1        | 4.10395    | 3.14087     | 0          | 1         | 1         |
| Slc30a1       | 1.0669     | 1.03        | -0.0507882 | 0.820275  | 0.941821  |
| Gm10516_j3    | 0.520239   | 0.521277    | 0          | 1         | 1         |
| Kcnh1         | 2.00588    | 1.3914      | 0          | 1         | 1         |
| Irf6          | 1.07191    | 1.11162     | 0          | 1         | 1         |
| A130010J15Rik | 0.874831   | 0.719625    | 0          | 1         | 1         |

|                  |           |                 |             |           |           |
|------------------|-----------|-----------------|-------------|-----------|-----------|
| Lamb3_j3         | 0.198952  | 0.163559        | -0.282609   | 0.777493  | 0.924738  |
| Lamb3_j6         | 0.08581   | 0.499429        | 2.54106     | 0.0004636 | 0.0076457 |
| XLOC_000548      | 0.0835863 | 0 -1.79769e+308 |             | 0.0013582 | 1         |
| XLOC_000548      | 0.150659  | 0 -1.79769e+308 |             | 1.53E-05  | 0.0004447 |
| XLOC_000548      | 0.295561  | 0 -1.79769e+308 |             | 1.76E-10  | 1.70E-08  |
| Plxna2           | 3.86201   | 3.23154         | 0           | 1         | 1         |
| Plxna2_j2        | 0.345946  | 0.357672        | 0           | 1         | 1         |
| Cd34             | 6.12467   | 4.77786         | -0.358266   | 0.0072005 | 0.0673334 |
| A330023F24Rik_j9 | 0.238628  | 0.0488142       | -2.28939    | 0.0009042 | 0.0132118 |
| Xkr4_j1          | 0.470586  | 0.540702        | 0.200374    | 0.331809  | 0.67329   |
| Sox17            | 0.236881  | 0 -1.79769e+308 |             | 8.31E-08  | 4.56E-06  |
| Sox17            | 0.402948  | 0.179019        | -1.17049    | 0.120976  | 0.433073  |
| Sox17_j4         | 0.443556  | 0.533806        | 0.267198    | 0.438589  | 0.748203  |
| Mrpl15           | 9.49943   | 9.44364         | -0.00849904 | 0.956116  | 0.987465  |
| Gm6104           | 8.87145   | 9.52644         | 0.102768    | 0.426435  | 0.741228  |
| Rgs20            | 0.427366  | 0.7668          | 0.843379    | 2.44E-05  | 0.000649  |
| Sntg1            | 0.209029  | 0.0801459       | -1.383      | 0.0130788 | 0.104547  |
| 2610203C22Rik_j4 | 0.0716826 | 0.0865087       | 0.271222    | 0.799552  | 1         |
| 2610203C22Rik_j6 | 0.169419  | 0.0514553       | -1.71921    | 0.0868426 | 0.36018   |
| 2610203C22Rik_j5 | 0.27507   | 0.213106        | -0.368228   | 0.403957  | 0.72656   |
| Mybl1_j2         | 0.420006  | 0.294829        | -0.510528   | 0.165253  | 0.501638  |
| Mybl1            | 0.104379  | 0.192049        | 0.879645    | 0.116964  | 0.425181  |
| Vcpip1           | 8.91156   | 7.84172         | -0.184509   | 0.0457314 | 0.244776  |
| Snhg6_j1         | 2.03371   | 2.24983         | 0.145701    | 0.70386   | 0.891632  |
| Snhg6            | 5.15975   | 6.664           | 0.369087    | 0.121442  | 0.433976  |
| Cops5            | 35.6366   | 38.2831         | 0.103348    | 0.291472  | 0.638573  |
| Arfgef1_j1       | 1.49206   | 0.880735        | 0           | 1         | 1         |
| Slco5a1_j3       | 0.0623705 | 0 -1.79769e+308 |             | 0.0002377 | 1         |
| Slco5a1_j5       | 0.692704  | 0.400959        | -0.788785   | 0.0032991 | 0.0371616 |
| Ncoa2_j7         | 0.424758  | 0.0511106       | 0           | 1         | 1         |
| Tram1            | 8.98264   | 8.28976         | 0           | 1         | 1         |
| Lactb2           | 1.26288   | 1.68993         | 0.420248    | 0.0017336 | 0.0222897 |
| Msc              | 0.330881  | 0.318142        | -0.0566448  | 0.866626  | 0.957738  |
| Trpa1            | 0.172523  | 0.00273588      | -5.97864    | 0.101465  | 0.394596  |
| Trpa1_j3         | 0.0588659 | 0.234344        | 1.99313     | 0.00511   | 0.0515643 |
| Trpa1_j2         | 9.01573   | 9.03509         | 0.00309548  | 0.976879  | 0.993247  |
| Gm106            | 0.233235  | 0.291234        | 0.320397    | 0.155615  | 0.488813  |
| AK015384_j2      | 0.510075  | 0.299281        | -0.769209   | 0.278572  | 0.627522  |
| AK015384_j4      | 0.329674  | 0.140729        | -1.22812    | 0.245083  | 0.592494  |
| AK015384_j5      | 0.241829  | 0.474698        | 0.973022    | 0.204036  | 0.548279  |
| Stau2            | 8.40797   | 8.37263         | 0           | 1         | 1         |
| Stau2            | 19.9293   | 14.3855         | 0           | 1         | 1         |
| Tceb1_j1         | 0.297633  | 0.272044        | -0.129692   | 0.746721  | 0.911779  |
| Tceb1            | 2.25833   | 2.76127         | 0.290076    | 0.0786993 | 0.340223  |
| Tceb1            | 2.24723   | 2.0683          | -0.119699   | 0.498182  | 0.783887  |
| Jph1_j2          | 0.267045  | 0.249976        | -0.0952947  | 0.827192  | 0.944318  |
| Jph1             | 0.672052  | 0.678093        | 0.01291     | 0.957926  | 0.987996  |

|                  |           |                 |            |           |           |
|------------------|-----------|-----------------|------------|-----------|-----------|
| XLOC_000593      | 0.123477  | 0.0556792       | -1.14904   | 0.287118  | 1         |
| Mcm3             | 0.568661  | 0.710468        | 0.321199   | 0.234531  | 0.581922  |
| Gm7658           | 50.7501   | 51.0213         | 0.00768888 | 0.935608  | 0.980308  |
| Rims1            | 1.18845   | 1.15465         | 0          | 1         | 1         |
| Rims1_j2         | 1.23874   | 1.17253         | 0          | 1         | 1         |
| Rims1_j1         | 2.98879   | 2.08094         | 0          | 1         | 1         |
| mKIAA0340        | 0.772597  | 0.149463        | -2.36992   | 0.0416939 | 0.230393  |
| Rims1_j20        | 0.191156  | 0 -1.79769e+308 |            | 0.0016699 | 0.0216068 |
| Rims1_j19        | 0.0683375 | 0.0555525       | -0.298825  | 0.8254    | 1         |
| Rims1_j18        | 0.262246  | 0 -1.79769e+308 |            | 0.000357  | 0.0061493 |
| Ogfrl1_j1        | 2.94852   | 1.30817         | 0          | 1         | 1         |
| Ogfrl1_j2        | 11.8103   | 6.32245         | 0          | 1         | 1         |
| Ogfrl1           | 25.5945   | 14.9836         | 0          | 1         | 1         |
| 1110058L19Rik    | 19.5672   | 19.2315         | -0.0249618 | 0.850917  | 0.952632  |
| Fam135a_j6       | 0.517685  | 0 -1.79769e+308 |            | 1.78E-15  | 3.74E-13  |
| Col19a1_j6       | 0.131649  | 0.13642         | 0.0513615  | 0.895216  | 1         |
| Col19a1_j4       | 0.0885338 | 0.0257576       | -1.78123   | 0.02872   | 1         |
| Bai3_j4          | 2.15601   | 1.0479          | 0          | 1         | 1         |
| Bai3_j5          | 1.22176   | 2.4322          | 0          | 1         | 1         |
| Bai3_j6          | 0.661899  | 0.365813        | 0          | 1         | 1         |
| Bai3             | 1.13363   | 1.07994         | 0          | 1         | 1         |
| Phf3_j3          | 0.532817  | 0.384706        | 0          | 1         | 1         |
| Phf3_j7          | 0.317632  | 0.0789939       | 0          | 1         | 1         |
| Phf3_j8          | 1.63539   | 1.32613         | 0          | 1         | 1         |
| Prim2            | 1.63647   | 1.7462          | 0.0936342  | 0.675468  | 0.877637  |
| Bag2_j1          | 2.91097   | 3.43128         | 0          | 1         | 1         |
| Bag2             | 5.43167   | 5.67815         | 0          | 1         | 1         |
| Zfp451           | 3.79204   | 3.78552         | 0          | 1         | 1         |
| Zfp451           | 1.69944   | 1.60723         | 0          | 1         | 1         |
| Gm15455          | 2.25258   | 2.5991          | 0.206437   | 0.202336  | 0.545938  |
| Bend6            | 36.3875   | 25.4612         | 0          | 1         | 1         |
| Bend6_j3         | 3.7033    | 8.83679         | 0          | 1         | 1         |
| Fam168b          | 35.5992   | 33.8184         | 0          | 1         | 1         |
| Uggt1_j2         | 4.46068   | 4.86319         | 0          | 1         | 1         |
| Uggt1_j3         | 2.3038    | 2.62091         | 0          | 1         | 1         |
| Uggt1            | 3.49329   | 1.75535         | 0          | 1         | 1         |
| Neurl3_j1        | 0.212024  | 0.329367        | 0.63547    | 0.233555  | 0.580806  |
| Neurl3_j3        | 0.120846  | 0.146583        | 0.278555   | 0.738486  | 1         |
| 4632411B12Rik_j3 | 2.34508   | 2.58652         | 0          | 1         | 1         |
| 4632411B12Rik_j1 | 7.14425   | 6.84349         | 0          | 1         | 1         |
| Lman2l_j3        | 6.24292   | 5.53638         | -0.173277  | 0.109894  | 0.412497  |
| Ankrd23_j4       | 0.548931  | 0.509788        | -0.106727  | 0.702885  | 0.891207  |
| Sema4c_j4        | 1.00931   | 0.995893        | 0          | 1         | 1         |
| Sema4c_j9        | 0.220331  | 0.152362        | 0          | 1         | 1         |
| Actr1b           | 79.6792   | 75.3578         | 0          | 1         | 1         |
| Tmem131_j2       | 2.50912   | 2.72994         | 0          | 1         | 1         |
| Tmem131_j3       | 4.34641   | 3.96178         | 0          | 1         | 1         |

|                  |           |           |            |           |           |
|------------------|-----------|-----------|------------|-----------|-----------|
| Tmem131          | 5.05071   | 3.87459   | 0          | 1         | 1         |
| 6330578E17Rik    | 9.06871   | 7.8116    | 0          | 1         | 1         |
| Mgat4a_j5        | 2.41237   | 3.44397   | 0          | 1         | 1         |
| Mgat4a_j6        | 0.368135  | 0.155726  | 0          | 1         | 1         |
| Mgat4a_j2        | 1.28096   | 0.387587  | 0          | 1         | 1         |
| 2010300C02Rik_j4 | 0.13295   | 0.0534597 | -1.31436   | 0.117014  | 1         |
| 2010300C02Rik_j6 | 0.0499068 | 0.241165  | 2.27271    | 0.0010601 | 0.0149511 |
| 2010300C02Rik    | 0.225751  | 0.0521554 | -2.11385   | 0.011827  | 0.0971543 |
| Tsga10_j1        | 0.510828  | 0.460233  | 0          | 1         | 1         |
| Tsga10           | 1.37815   | 1.08229   | 0          | 1         | 1         |
| Tsga10           | 0.12207   | 0.144471  | 0          | 1         | 1         |
| Mitd1            | 1.32547   | 1.30373   | 0          | 1         | 1         |
| Mitd1_j1         | 2.29566   | 2.22787   | 0          | 1         | 1         |
| Txndc9_j1        | 0.5015    | 0.565798  | 0.174037   | 0.573614  | 0.827718  |
| Txndc9           | 0.400616  | 0.326083  | -0.296979  | 0.42816   | 0.742098  |
| Txndc9           | 2.69623   | 3.12795   | 0.214271   | 0.142404  | 0.469079  |
| Aff3_j11         | 6.12743   | 5.23429   | 0          | 1         | 1         |
| Aff3_j12         | 0.475125  | 0         | 0          | 1         | 1         |
| Aff3_j6          | 2.54628   | 3.29346   | 0          | 1         | 1         |
| Aff3_j13         | 0.209983  | 0         | 0          | 1         | 1         |
| Lonrf2_j1        | 8.95184   | 7.91038   | 0          | 1         | 1         |
| Chst10_j5        | 1.60518   | 1.45092   | 0          | 1         | 1         |
| Chst10_j6        | 0.440402  | 0.552878  | 0          | 1         | 1         |
| Chst10           | 1.21165   | 1.07688   | 0          | 1         | 1         |
| Tbc1d8           | 3.84285   | 2.44744   | -0.6509    | 1.89E-05  | 0.0005316 |
| Creg2            | 1.36855   | 1.00273   | 0          | 1         | 1         |
| AK041998_j2      | 0.148042  | 0.164898  | 0.155566   | 0.785602  | 0.928253  |
| XLOC_000651      | 0.284447  | 0.188148  | -0.596289  | 0.183005  | 0.523488  |
| Mfsd9_j4         | 0.905886  | 0.972529  | 0.102413   | 0.754591  | 0.915367  |
| Mfsd9            | 3.46497   | 3.28133   | -0.0785644 | 0.615719  | 0.848504  |
| Tgfbrap1_j1      | 4.78704   | 5.38403   | 0          | 1         | 1         |
| Tgfbrap1_j2      | 0.282589  | 0.458547  | 0          | 1         | 1         |
| Tgfbrap1         | 0.34208   | 0.1515    | 0          | 1         | 1         |
| Fhl2             | 1.18167   | 1.4015    | 0.246136   | 0.331544  | 0.673024  |
| Uxs1_j3          | 15.9474   | 14        | 0          | 1         | 1         |
| 1700029F09Rik_j5 | 0.473676  | 0.919005  | 0.956173   | 0.078375  | 0.339388  |
| 1700029F09Rik_j1 | 3.03032   | 2.71585   | -0.158066  | 0.53071   | 0.80314   |
| Kdelc1_j1        | 0.49787   | 0.321312  | 0          | 1         | 1         |
| Col5a2_j1        | 1.71589   | 2.29584   | 0          | 1         | 1         |
| Col5a2_j2        | 0.298996  | 0.102466  | 0          | 1         | 1         |
| Col5a2           | 2.61658   | 3.38754   | 0          | 1         | 1         |
| Slc40a1          | 0.556194  | 0.255727  | -1.12099   | 0.0064593 | 0.0619105 |
| Slc39a10_j1      | 1.20327   | 0.901772  | 0          | 1         | 1         |
| Slc39a10         | 4.30697   | 3.34541   | 0          | 1         | 1         |
| Slc39a10_j4      | 1.76183   | 1.2481    | 0          | 1         | 1         |
| Nabp1_j1         | 0.176122  | 0.230806  | 0.390107   | 0.321147  | 0.664254  |
| Obfc2a           | 1.16867   | 0.950455  | -0.298176  | 0.283453  | 0.631874  |

|             |           |                 |            |           |           |
|-------------|-----------|-----------------|------------|-----------|-----------|
| Nabp1_j3    | 0.597031  | 1.225           | 1.0369     | 0.00159   | 0.0207444 |
| Myo1b       | 3.51949   | 3.18181         | 0          | 1         | 1         |
| Gls         | 4.90926   | 4.2702          | -0.201202  | 0.0997153 | 0.390914  |
| Nab1_j1     | 0.831714  | 1.0632          | 0.354248   | 0.218514  | 0.564931  |
| Nab1        | 8.25773   | 9.17924         | 0.15263    | 0.171938  | 0.509035  |
| Mfsd6_j5    | 20.0783   | 26.2551         | 0          | 1         | 1         |
| Mfsd6_j6    | 6.65347   | 10.9983         | 0          | 1         | 1         |
| Mfsd6_j2    | 9.19101   | 5.05071         | 0          | 1         | 1         |
| Inpp1       | 0.751724  | 0.705377        | 0          | 1         | 1         |
| Pms1        | 0.203453  | 0.000134833     | -10.5593   | 0.828199  | 0.944579  |
| Asnsd1      | 19.2187   | 20.2273         | 0.0737953  | 0.458277  | 0.760916  |
| XLOC_000678 | 0.188795  | 0 -1.79769e+308 |            | 6.92E-05  | 0.0015708 |
| XLOC_000678 | 0.178175  | 0.172752        | -0.0445916 | 0.947932  | 0.98492   |
| AK038423    | 0.630121  | 0.736625        | 0.225301   | 0.603681  | 0.843443  |
| AK038423_j1 | 0.411043  | 0.15534         | -1.40386   | 0.110621  | 0.413936  |
| Stk17b      | 1.25606   | 1.66974         | 0.410721   | 0.024653  | 0.16278   |
| Hecw2       | 0.124721  | 0.0406322       | 0          | 1         | 1         |
| Hecw2_j5    | 0.12418   | 0.0523691       | 0          | 1         | 1         |
| Gtf3c3      | 1.01411   | 0.735414        | -0.463585  | 0.101796  | 0.395253  |
| Pgap1       | 0.936968  | 0.448238        | -1.06374   | 3.32E-06  | 0.000119  |
| Ankrd44_j2  | 0.631238  | 0.76785         | 0.28264    | 0.195138  | 0.537411  |
| Sf3b1       | 20.6342   | 19.4073         | 0          | 1         | 1         |
| Hspd1_j8    | 0.697799  | 0.60038         | -0.216936  | 0.467511  | 0.766717  |
| Rftn2       | 1.85624   | 2.037           | 0.134064   | 0.409406  | 0.729755  |
| Kctd18_j1   | 1.02287   | 0.821684        | -0.315972  | 0.420174  | 0.736557  |
| Clk1        | 10.5816   | 11.1263         | 0          | 1         | 1         |
| Clk1_j1     | 2.33523   | 5.64484         | 0          | 1         | 1         |
| Clk1        | 1.73803   | 1.01873         | 0          | 1         | 1         |
| Clk1        | 1.20115   | 2.76042         | 0          | 1         | 1         |
| Orc2        | 6.07945   | 6.16488         | 0          | 1         | 1         |
| Fam126b_j5  | 3.06634   | 1.91136         | -0.681919  | 1.21E-05  | 0.0003658 |
| Trak2_j3    | 2.1244    | 2.38536         | 0          | 1         | 1         |
| Trak2_j4    | 0.0497751 | 0               | 0          | 1         | 1         |
| Trak2_j5    | 1.85719   | 1.91247         | 0          | 1         | 1         |
| Trak2       | 5.69271   | 5.55151         | 0          | 1         | 1         |
| Als2cr4     | 8.18111   | 6.01008         | 0          | 1         | 1         |
| Als2cr4_j1  | 1.63899   | 0.783697        | 0          | 1         | 1         |
| Mpp4_j2     | 0.0837559 | 0.0201961       | -2.05211   | 0.297158  | 1         |
| Als2        | 3.42048   | 3.36835         | -0.0221546 | 0.860695  | 0.955865  |
| Sumo1_j2    | 39.8916   | 37.9613         | -0.0715528 | 0.49951   | 0.784641  |
| Ica1l_j1    | 0.119689  | 0 -1.79769e+308 |            | 0.0004939 | 1         |
| Ica1l       | 0.559146  | 0.501631        | -0.156598  | 0.661594  | 0.871766  |
| Ica1l_j2    | 0.302163  | 0.260963        | -0.21148   | 0.667012  | 0.874037  |
| Ica1l_j3    | 0.713102  | 1.12054         | 0.652016   | 0.0172448 | 0.127054  |
| Ica1l       | 2.04898   | 1.43245         | -0.516422  | 0.14694   | 0.475353  |
| Wdr12_j3    | 0.0720843 | 0 -1.79769e+308 |            | 0.0001174 | 1         |
| Raph1_j3    | 1.92095   | 2.16313         | 0          | 1         | 1         |

|                  |           |             |            |           |          |
|------------------|-----------|-------------|------------|-----------|----------|
| Raph1_j5         | 2.9341    | 2.38739     | 0          | 1         | 1        |
| XLOC_000710      | 0.183123  | 0.0398137   | -2.20148   | 0.172999  | 0.510725 |
| Ndufs1           | 3.378     | 2.66607     | 0          | 1         | 1        |
| Gpr1_j1          | 0.110867  | 0.0893851   | -0.31072   | 0.762497  | 1        |
| Gpr1             | 0.245192  | 0.212888    | -0.203815  | 0.718699  | 0.89877  |
| Dytn_j1          | 0.118466  | 0.106118    | -0.158799  | 0.86081   | 1        |
| Dytn_j3          | 0.325583  | 0.095528    | -1.76903   | 0.0515779 | 0.263342 |
| Mdh1b_j1         | 0.114222  | 0.0365402   | -1.64428   | 0.291064  | 1        |
| XLOC_000719      | 0.260544  | 0.155798    | -0.741851  | 0.317557  | 0.660869 |
| Klf7_j4          | 22.4077   | 28.3435     | 0          | 1         | 1        |
| Klf7             | 8.48371   | 7.38343     | 0          | 1         | 1        |
| Fam119a_j2       | 5.46603   | 4.99775     | -0.129215  | 0.449182  | 0.755415 |
| Fam119a          | 1.21077   | 1.2547      | 0.0514153  | 0.823866  | 0.943114 |
| AK013046         | 0.294882  | 0.315148    | 0.0958903  | 0.880253  | 0.96181  |
| Fzd5             | 0.159693  | 0.139024    | -0.199972  | 0.756152  | 0.915908 |
| Plekhm3_j1       | 0.85598   | 0.000288201 | 0          | 1         | 1        |
| Plekhm3_j5       | 8.19178   | 8.22895     | 0          | 1         | 1        |
| Plekhm3          | 6.17577   | 3.8516      | 0          | 1         | 1        |
| Rpl10a-ps1       | 182.278   | 204.979     | 0.169333   | 0.0524903 | 0.26616  |
| D630023F18Rik_j1 | 0.120167  | 0.0695972   | -0.78794   | 0.505502  | 1        |
| D630023F18Rik    | 0.347644  | 0.223804    | -0.635371  | 0.348802  | 0.686741 |
| D630023F18Rik    | 0.1447    | 0.245119    | 0.760422   | 0.292106  | 0.638961 |
| ldh1             | 69.7197   | 68.4802     | -0.0258801 | 0.768185  | 0.921044 |
| Acadl            | 63.2026   | 63.3201     | 0.0026796  | 0.976003  | 0.993119 |
| Lancl1           | 31.6759   | 30.882      | -0.0366212 | 0.675379  | 0.877609 |
| Bard1_j6         | 0.100656  | 0.132569    | 0.397308   | 0.590838  | 1        |
| Mreg_j1          | 0.322975  | 0.0864465   | -1.90154   | 0.0470281 | 0.248626 |
| Mreg             | 2.50638   | 2.75696     | 0.137473   | 0.434546  | 0.745651 |
| Pecr             | 4.12633   | 3.63557     | -0.182676  | 0.340796  | 0.680712 |
| March4           | 3.92962   | 4.48332     | 0.190175   | 0.107687  | 0.407901 |
| Igfbp5           | 10.3228   | 11.2901     | 0.129225   | 0.168903  | 0.505733 |
| Tns1_j8          | 0.762618  | 0.391552    | 0          | 1         | 1        |
| Tns1_j9          | 0.0855708 | 0           | 0          | 1         | 1        |
| Tns1_j2          | 11.2361   | 6.05324     | 0          | 1         | 1        |
| Aamp_j4          | 0.455702  | 0.519943    | 0.190263   | 0.723256  | 0.90144  |
| Tmbim1_j3        | 0.376376  | 0.31141     | -0.273356  | 0.414876  | 0.73288  |
| Tmbim1_j4        | 1.09948   | 1.15596     | 0.0722696  | 0.68596   | 0.882925 |
| Usp37_j4         | 1.32117   | 0.37634     | 0          | 1         | 1        |
| Rnf25_j2         | 0.34914   | 0.476168    | 0          | 1         | 1        |
| Cryba2           | 3.27427   | 6.31229     | 0.946993   | 4.91E-08  | 2.90E-06 |
| 1810031K17Rik    | 14.0933   | 16.4577     | 0.223746   | 0.0511087 | 0.261939 |
| Abcb6            | 2.26896   | 2.73921     | 0.271725   | 0.0571271 | 0.280055 |
| Atg9a_j4         | 0.394158  | 0.0784233   | 0          | 1         | 1        |
| Glb1l_j2         | 1.80993   | 1.85776     | 0          | 1         | 1        |
| Glb1l_j3         | 0.153523  | 0.128541    | 0          | 1         | 1        |
| Ptprn_j6         | 26.0029   | 39.6767     | 0          | 1         | 1        |
| Ptprn_j7         | 0.456834  | 0.0457484   | 0          | 1         | 1        |

|                  |           |                 |            |           |           |
|------------------|-----------|-----------------|------------|-----------|-----------|
| Resp18           | 64.2198   | 59.2726         | -0.115653  | 0.238726  | 0.585819  |
| Dnpep            | 12.2773   | 11.984          | 0          | 1         | 1         |
| Dnpep            | 5.35585   | 4.67555         | 0          | 1         | 1         |
| Obsl1_j2         | 7.01714   | 6.36355         | 0          | 1         | 1         |
| Obsl1_j5         | 2.41682   | 2.88615         | 0          | 1         | 1         |
| Obsl1_j6         | 0.953306  | 1.18181         | 0          | 1         | 1         |
| Obsl1            | 3.44455   | 3.27737         | -0.0717786 | 0.527666  | 0.801757  |
| Epha4            | 0.13223   | 0.057413        | -1.2036    | 0.0848907 | 1         |
| XLOC_000763      | 1.12546   | 0.977144        | -0.203877  | 0.699507  | 0.889401  |
| Farsb            | 35.7376   | 39.5604         | 0.146614   | 0.118528  | 0.428543  |
| Scg2_j1          | 31.9394   | 28.0591         | 0          | 1         | 1         |
| Ap1s3_j1         | 0.224464  | 0.18936         | -0.245354  | 0.701829  | 0.890467  |
| Wdfy1_j4         | 1.90561   | 1.67462         | 0          | 1         | 1         |
| Serpine2         | 35.0954   | 31.9238         | -0.13665   | 0.15132   | 0.482411  |
| Cul3             | 3.29985   | 2.86938         | 0          | 1         | 1         |
| Dock10_j1        | 0.913562  | 0.770402        | 0          | 1         | 1         |
| Dock10_j2        | 1.53011   | 0.799969        | 0          | 1         | 1         |
| Irs1_j1          | 0.779959  | 0.665937        | -0.228013  | 0.322815  | 0.665895  |
| Irs1             | 0.510544  | 0.437227        | -0.223653  | 0.36656   | 0.700205  |
| Slc19a3          | 0.0387123 | 0.0784285       | 1.01858    | 0.381975  | 1         |
| Sphkap_j2        | 3.44942   | 2.5457          | 0          | 1         | 1         |
| Pid1             | 3.94855   | 3.89528         | -0.0195964 | 0.901657  | 0.968734  |
| Dner             | 32.7063   | 29.396          | -0.153948  | 0.084109  | 0.353872  |
| Trip12_j12       | 2.49406   | 2.29425         | 0          | 1         | 1         |
| Trip12_j13       | 1.24656   | 0.502545        | 0          | 1         | 1         |
| Sp110_j3         | 0.0899135 | 0 -1.79769e+308 |            | 0.0880248 | 1         |
| Sp110_j5         | 0.0954071 | 0.0682123       | -0.484064  | 0.739475  | 1         |
| A630001G21Rik_j1 | 0.114219  | 0.063376        | -0.84979   | 0.447491  | 1         |
| A630001G21Rik_j2 | 0.0898287 | 0.095695        | 0.0912666  | 0.921469  | 1         |
| Ncl_j3           | 34.4717   | 37.8376         | 0.134408   | 0.149358  | 0.478596  |
| Ncl              | 14.3391   | 15.9806         | 0.156368   | 0.143746  | 0.470722  |
| Nmur1_j1         | 0.12055   | 0.00463917      | -4.69962   | 0.253317  | 1         |
| Nmur1_j3         | 0.439929  | 0.572214        | 0.379285   | 0.27293   | 0.621826  |
| Nmur1_j2         | 0.22623   | 0.00210168      | -6.7501    | 0.358056  | 0.693676  |
| Pde6d            | 13.7543   | 13.655          | 0          | 1         | 1         |
| Gm6136           | 148.673   | 170.893         | 0          | 1         | 1         |
| Ecel1_j1         | 0.651313  | 2.34769         | 1.84982    | 0         | 0         |
| Ecel1_j12        | 1.25235   | 3.65398         | 1.54483    | 1.24E-07  | 6.51E-06  |
| Ecel1_j13        | 0.141301  | 0.395997        | 1.48672    | 0.0129347 | 0.103684  |
| Ngef             | 1.59939   | 1.56028         | -0.0357175 | 0.8645    | 0.956914  |
| Usp40_j1         | 1.52696   | 1.95865         | 0.359192   | 0.0499385 | 0.258191  |
| Usp40_j3         | 0.635441  | 0.361449        | -0.813966  | 0.0079531 | 0.0722495 |
| Hjurp            | 1.92849   | 1.66277         | -0.21388   | 0.153474  | 0.486035  |
| Arl4c            | 12.781    | 14.7086         | 0.20266    | 0.0338829 | 0.201499  |
| Col6a3_j6        | 0.261495  | 0.335585        | 0.359898   | 0.234758  | 0.582023  |
| Col6a3_j5        | 0.0615936 | 3.82E-05        | -10.654    | 0.845283  | 1         |
| Ilkap            | 15.1561   | 16.9067         | 0.157701   | 0.190706  | 0.533048  |

|             |            |                 |            |           |           |
|-------------|------------|-----------------|------------|-----------|-----------|
| Hes6        | 5.23524    | 5.23096         | -0.0011802 | 0.994456  | 0.998387  |
| Per2_j8     | 0.0625986  | 0.0608478       | -0.040927  | 0.959281  | 1         |
| Hdac4_j2    | 0.00191832 | 0.170386        | 0          | 1         | 1         |
| Hdac4_j6    | 1.71349    | 1.42984         | 0          | 1         | 1         |
| Hdac4_j7    | 0.194892   | 0               | 0          | 1         | 1         |
| Ndufa10     | 66.6571    | 65.1929         | -0.0320439 | 0.718175  | 0.898553  |
| Myeov2      | 15.8605    | 17.8106         | 0.167298   | 0.329073  | 0.671442  |
| Myeov2      | 21.9745    | 24.4933         | 0.156555   | 0.244891  | 0.592357  |
| XLOC_000808 | 0.13977    | 0.121143        | -0.206341  | 0.840101  | 0.949331  |
| Kif1a_j11   | 6.01938    | 17.0241         | 0          | 1         | 1         |
| Kif1a_j14   | 9.17051    | 0.0786846       | 0          | 1         | 1         |
| Kif1a_j13   | 1.05729    | 0.06794         | 0          | 1         | 1         |
| Mterfd2     | 3.79461    | 4.17732         | 0.138626   | 0.24482   | 0.592355  |
| Hdlbp       | 13.5332    | 16.3059         | 0          | 1         | 1         |
| Hdlbp       | 23.0346    | 17.5462         | 0          | 1         | 1         |
| Stk25_j5    | 2.0478     | 1.42817         | 0          | 1         | 1         |
| Stk25_j4    | 1.13803    | 0.987658        | 0          | 1         | 1         |
| Thap4_j1    | 3.80788    | 4.41099         | 0.212118   | 0.457925  | 0.760721  |
| Thap4       | 6.68904    | 6.87377         | 0.0393041  | 0.769828  | 0.921491  |
| Dtymk_j1    | 6.66037    | 6.5257          | -0.0294681 | 0.903196  | 0.969087  |
| Dtymk_j2    | 0.244247   | 0 -1.79769e+308 |            | 0.0045366 | 0.0471951 |
| St8sia4     | 0.397626   | 0.340728        | -0.222792  | 0.499835  | 0.784832  |
| Slco6c1_j1  | 0.122291   | 0.0376402       | -1.69997   | 0.175824  | 1         |
| D1Ert622e   | 2.77308    | 2.43231         | 0          | 1         | 1         |
| D1Ert622e   | 8.70388    | 7.13138         | 0          | 1         | 1         |
| Pam         | 0.734883   | 0.304355        | 0          | 1         | 1         |
| Pign_j4     | 0.908604   | 0.676198        | -0.426205  | 0.142207  | 0.46882   |
| Pign_j6     | 0.0688136  | 0.140906        | 1.03397    | 0.0873225 | 1         |
| Pign_j5     | 0.119786   | 0 -1.79769e+308 |            | 5.32E-06  | 1         |
| Pign        | 0.458861   | 0.350341        | -0.389296  | 0.19862   | 0.541835  |
| Bcl2        | 0.408775   | 0 -1.79769e+308 |            | 8.19E-17  | 2.10E-14  |
| Kdsr        | 6.31075    | 6.66068         | 0.0778564  | 0.474229  | 0.770598  |
| Vps4b       | 0.152316   | 0.155742        | 0.0320867  | 0.955782  | 0.987317  |
| Cdh19_j1    | 0.674132   | 1.11266         | 0.722915   | 0.0007606 | 0.0114998 |
| Cdh19_j3    | 0.0546014  | 0.0625085       | 0.195114   | 0.785541  | 1         |
| XLOC_000841 | 0.196266   | 0.0751734       | -1.38452   | 0.36602   | 0.699964  |
| XLOC_000842 | 0.120341   | 0.0325102       | -1.88817   | 0.369556  | 1         |
| AK043174_j1 | 0.183067   | 0.0460918       | -1.98979   | 0.306366  | 0.651661  |
| Tsn_j2      | 0.0912175  | 1.59078         | 0          | 1         | 1         |
| Tsn         | 14.3766    | 14.2921         | 0          | 1         | 1         |
| Inhbb       | 2.07571    | 2.57006         | 0          | 1         | 1         |
| Ralb_j2     | 0.43372    | 0.648738        | 0          | 1         | 1         |
| Epb4.115_j4 | 0.913531   | 0.643378        | -0.505788  | 0.062495  | 0.295796  |
| Epb4.115_j5 | 0.0816213  | 0.0135807       | -2.58739   | 0.0403348 | 1         |
| Epb4.115    | 0.0709292  | 0.0310255       | -1.19293   | 0.208213  | 1         |
| Epb4.115_j1 | 0.0824554  | 0 -1.79769e+308 |            | 0.0301112 | 1         |
| Ptpn4_j7    | 0.99682    | 0.855412        | 0          | 1         | 1         |



|             |           |                 |            |           |           |
|-------------|-----------|-----------------|------------|-----------|-----------|
| XLOC_000851 | 0.148434  | 0.141259        | -0.0714811 | 0.924155  | 0.976334  |
| Tmem177     | 3.39624   | 3.04168         | -0.159072  | 0.305009  | 0.65013   |
| Tmem37      | 1.02224   | 0.920128        | -0.151828  | 0.64743   | 0.864108  |
| Dbi         | 86.6643   | 98.0242         | 0.177701   | 0.0672593 | 0.310074  |
| Steap3_j1   | 15.0205   | 19.2527         | 0.358124   | 0.0003512 | 0.006069  |
| Insig2      | 1.3635    | 1.82523         | 0          | 1         | 1         |
| XLOC_000856 | 0.200501  | 0.180991        | -0.14769   | 0.802903  | 0.934497  |
| XLOC_000856 | 0.216615  | 0.258776        | 0.256571   | 0.67016   | 0.875218  |
| XLOC_000856 | 0.0890339 | 0 -1.79769e+308 |            | 0.0242417 | 1         |
| Htr5b       | 1.68305   | 1.34723         | -0.321086  | 0.168061  | 0.504739  |
| Ddx18_j2    | 0.763839  | 0.780972        | 0.0320028  | 0.918917  | 0.974671  |
| Ddx18_j1    | 0.157171  | 0.10983         | -0.517056  | 0.452335  | 0.757478  |
| Ddx18_j3    | 0.15191   | 0.134631        | -0.1742    | 0.827861  | 0.944579  |
| Ddx18_j5    | 0.589917  | 0.590558        | 0.00156798 | 0.997539  | 0.999228  |
| Ddx18_j6    | 0.176432  | 0.0281726       | -2.64675   | 0.193812  | 0.536058  |
| Ddx18_j13   | 0.246895  | 0.216427        | -0.190023  | 0.886941  | 0.964085  |
| Ddx18_j14   | 1.71771   | 1.58104         | -0.11961   | 0.857317  | 0.954789  |
| Dpp10_j2    | 0.678238  | 0.519911        | 0          | 1         | 1         |
| Dpp10_j3    | 1.15102   | 0.704916        | 0          | 1         | 1         |
| Lypd1       | 0.529768  | 0.534259        | 0.0121795  | 0.957539  | 0.987909  |
| Lypd1_j1    | 1.42668   | 1.3898          | -0.0377865 | 0.909692  | 0.971495  |
| Tmem163     | 0.241661  | 0.13841         | 0          | 1         | 1         |
| Zranb3_j6   | 0.0969794 | 0 -1.79769e+308 |            | 0.000518  | 1         |
| Zranb3      | 0.404604  | 0.324319        | -0.319097  | 0.355972  | 0.691825  |
| Mcm6        | 1.58625   | 2.23413         | 0          | 1         | 1         |
| Dars        | 23.2749   | 24.6031         | 0.080065   | 0.396365  | 0.721081  |
| Cxcr4       | 9.58788   | 8.38925         | -0.192671  | 0.158905  | 0.49339   |
| Cxcr4       | 1.5793    | 1.52592         | -0.0496116 | 0.873752  | 0.959888  |
| Gm15790     | 4.48381   | 5.00334         | 0.158166   | 0.328129  | 0.670687  |
| Cd55_j3     | 0.0594124 | 0 -1.79769e+308 |            | 0.0576903 | 1         |
| Cd55_j5     | 0.421086  | 0.513754        | 0.286964   | 0.234116  | 0.581507  |
| Cd55_j7     | 19.1631   | 15.4044         | -0.314992  | 0.0050878 | 0.0513834 |
| Mapkapk2    | 11.2227   | 13.1034         | 0.223528   | 0.0436519 | 0.237428  |
| Dyrk3_j2    | 1.43383   | 1.27788         | -0.166126  | 0.572446  | 0.827134  |
| Dyrk3       | 1.39896   | 1.43347         | 0.0351546  | 0.893404  | 0.966325  |
| Rassf5_j3   | 0.680366  | 0.292552        | 0          | 1         | 1         |
| Srgap2_j2   | 2.1944    | 2.24639         | 0          | 1         | 1         |
| Srgap2_j3   | 0.600387  | 0.142891        | 0          | 1         | 1         |
| Srgap2_j5   | 0.680833  | 0.558654        | 0          | 1         | 1         |
| Mfsd4_j1    | 0.160152  | 0.224888        | 0.489765   | 0.194788  | 0.537206  |
| Cdk18       | 1.77028   | 2.40479         | 0.441931   | 0.0077146 | 0.0708087 |
| Tmcc2       | 11.9285   | 12.8891         | 0          | 1         | 1         |
| Cntn2_j1    | 11.5067   | 14.9072         | 0          | 1         | 1         |
| Cntn2_j4    | 17.0319   | 13.9483         | 0          | 1         | 1         |
| Nfasc_j6    | 11.6734   | 11.247          | 0          | 1         | 1         |
| Nfasc       | 9.17534   | 6.90784         | 0          | 1         | 1         |
| Mdm4_j1     | 0.483846  | 0.23244         | 0          | 1         | 1         |

|                  |           |                 |            |           |           |
|------------------|-----------|-----------------|------------|-----------|-----------|
| Mdm4_j6          | 1.28368   | 0.850008        | 0          | 1         | 1         |
| Mdm4_j7          | 0.488435  | 0.566666        | 0          | 1         | 1         |
| Sox13_j7         | 0.389308  | 0               | 0          | 1         | 1         |
| Sox13_j3         | 0.242498  | 0.172119        | 0          | 1         | 1         |
| Sox13            | 1.55377   | 1.22853         | 0          | 1         | 1         |
| Snrpe_j1         | 0.741881  | 1.26144         | 0.765806   | 0.255133  | 0.6036    |
| Snrpe            | 3.53437   | 3.78062         | 0.0971673  | 0.688164  | 0.884104  |
| Zc3h11a_j4       | 11.2762   | 12.3471         | 0.130894   | 0.233054  | 0.580324  |
| Zc3h11a_j5       | 0.568796  | 0.516564        | -0.138964  | 0.587505  | 0.835056  |
| Zc3h11a_j6       | 0.325092  | 0 -1.79769e+308 |            | 1.43E-10  | 1.41E-08  |
| Zc3h11a          | 2.45397   | 1.96025         | -0.324081  | 0.0818988 | 0.348667  |
| Atp2b4_j8        | 3.32072   | 4.31069         | 0          | 1         | 1         |
| Atp2b4_j5        | 3.84509   | 4.69917         | 0          | 1         | 1         |
| Prelp            | 1.50913   | 1.73877         | 0.204349   | 0.25259   | 0.600518  |
| Btg2             | 3.04321   | 5.38807         | 0.824177   | 7.42E-09  | 5.28E-07  |
| Adora1           | 9.37803   | 6.24235         | 0          | 1         | 1         |
| Adora1           | 1.55168   | 0.655395        | 0          | 1         | 1         |
| Ppfia4_j4        | 9.89272   | 7.5463          | 0          | 1         | 1         |
| Ppp1r12b         | 3.72214   | 3.23034         | 0          | 1         | 1         |
| Gpr37l1          | 39.6886   | 40.8964         | 0.0432503  | 0.633712  | 0.857901  |
| Rnpep_j1         | 1.34084   | 2.68326         | 1.00085    | 0.006829  | 0.0645822 |
| Rnpep            | 3.97683   | 5.3955          | 0.440138   | 0.0055109 | 0.0546483 |
| Timm17a          | 7.70753   | 6.64763         | -0.213428  | 0.0265057 | 0.17114   |
| Shisa4_j5        | 2.19747   | 5.53552         | 0          | 1         | 1         |
| Shisa4           | 0.116203  | 0               | 0          | 1         | 1         |
| Ipo9             | 3.90238   | 2.84356         | 0          | 1         | 1         |
| Nav1_j2          | 6.69733   | 4.66422         | 0          | 1         | 1         |
| Nav1_j9          | 0.0725335 | 0.102028        | 0          | 1         | 1         |
| Nav1_j10         | 0.514554  | 0.410341        | 0          | 1         | 1         |
| Camsap1l1_j1     | 8.05479   | 9.43789         | 0          | 1         | 1         |
| Camsap1l1_j2     | 6.52034   | 5.14632         | 0          | 1         | 1         |
| Nek7             | 40.4919   | 25.6979         | 0          | 1         | 1         |
| 2310009B15Rik    | 2.3529    | 1.75006         | -0.427039  | 0.278724  | 0.627544  |
| 2310009B15Rik    | 4.08453   | 4.87999         | 0.256708   | 0.288161  | 0.636106  |
| Cfh              | 0.948892  | 1.71622         | 0          | 1         | 1         |
| Cdc73            | 3.40917   | 3.24687         | -0.0703693 | 0.504883  | 0.787934  |
| Trove2           | 5.44159   | 4.95254         | 0          | 1         | 1         |
| Rgs2             | 5.80477   | 5.23826         | -0.148152  | 0.292714  | 0.639709  |
| BC003331         | 22.5411   | 21.0338         | -0.0998448 | 0.287163  | 0.635532  |
| Hmcn1_j2         | 0.627346  | 0.529758        | -0.243929  | 0.626394  | 0.854124  |
| Hmcn1_j4         | 0.149171  | 0 -1.79769e+308 |            | 3.74E-10  | 3.37E-08  |
| 1200016B10Rik_j1 | 1.36533   | 1.90927         | 0.483772   | 0.100768  | 0.393107  |
| 1200016B10Rik    | 1.72129   | 1.67005         | -0.043598  | 0.797379  | 0.932636  |
| Rnf2             | 2.82833   | 2.68464         | -0.075225  | 0.666678  | 0.873788  |
| Tsen15_j3        | 7.83773   | 8.36346         | 0.0936634  | 0.574717  | 0.828142  |
| Tsen15_j2        | 4.18644   | 2.62659         | -0.672535  | 0.009427  | 0.0820157 |
| Rgl1_j4          | 2.02513   | 1.25488         | 0          | 1         | 1         |

|             |           |                 |             |           |           |
|-------------|-----------|-----------------|-------------|-----------|-----------|
| Smg7_j2     | 2.52267   | 0.30543         | 0           | 1         | 1         |
| Smg7        | 3.04314   | 4.80159         | 0           | 1         | 1         |
| Lamc2_j2    | 0.14089   | 0.0265928       | -2.40546    | 0.0752737 | 0.331168  |
| Lamc2_j7    | 0.168649  | 0.0936862       | -0.848118   | 0.2699    | 0.619031  |
| Lamc1       | 2.64992   | 2.66976         | 0           | 1         | 1         |
| Dhx9_j2     | 19.3227   | 20.1418         | 0           | 1         | 1         |
| Npl         | 1.9548    | 1.73801         | -0.169578   | 0.478888  | 0.773346  |
| Cacna1e_j9  | 0.0967263 | 0.0210838       | -2.19777    | 0.367372  | 1         |
| Cacna1e_j10 | 0.138755  | 0.138426        | -0.00342497 | 0.99477   | 0.998479  |
| Ier5        | 1.57364   | 3.01932         | 0.940116    | 1.81E-09  | 1.46E-07  |
| Mr1         | 0.652015  | 0.439127        | -0.570266   | 0.146925  | 0.475353  |
| Mr1         | 0.37858   | 0.191551        | -0.982868   | 0.0850626 | 0.356009  |
| BC034090_j3 | 0.0717262 | 0 -1.79769e+308 |             | 0.0034631 | 1         |
| BC034090_j4 | 0.195268  | 0.139556        | -0.484618   | 0.350954  | 0.688199  |
| BC034090_j6 | 0.415726  | 0.375979        | -0.144982   | 0.650797  | 0.86597   |
| Xpr1_j1     | 3.40422   | 3.91401         | 0           | 1         | 1         |
| Xpr1_j2     | 0.701405  | 0.86251         | 0           | 1         | 1         |
| Xpr1        | 2.54711   | 2.00706         | 0           | 1         | 1         |
| Qsox1       | 13.3094   | 13.7741         | 0.0495153   | 0.624517  | 0.853373  |
| Cep350_j5   | 0.177435  | 0.0843611       | 0           | 1         | 1         |
| Cep350_j2   | 0.107376  | 0.0380515       | 0           | 1         | 1         |
| Lap1B_j1    | 4.45458   | 5.02624         | 0.174189    | 0.197134  | 0.53985   |
| Fam163a_j2  | 0.463961  | 0.303399        | -0.612789   | 0.124152  | 0.439098  |
| Tdrd5_j1    | 0.172803  | 0.148889        | -0.214887   | 0.799249  | 0.933125  |
| Tdrd5_j2    | 0.122321  | 0.0517772       | -1.24029    | 0.249795  | 1         |
| Tdrd5_j3    | 0.145268  | 0.114934        | -0.337912   | 0.639432  | 0.860505  |
| Fam20b_j3   | 2.07395   | 0.966398        | 0           | 1         | 1         |
| Fam20b      | 4.8043    | 3.90659         | 0           | 1         | 1         |
| Fam20b      | 6.43084   | 4.82364         | 0           | 1         | 1         |
| Ralgps2_j4  | 0.21502   | 0               | 0           | 1         | 1         |
| Ralgps2     | 5.14557   | 5.25872         | 0           | 1         | 1         |
| Rasal2_j6   | 0.497585  | 0.145945        | -1.76952    | 4.12E-06  | 0.0001428 |
| Rasal2_j7   | 0.366582  | 0.358763        | -0.0311055  | 0.914713  | 0.973381  |
| Rasal2_j8   | 1.32383   | 0.774963        | -0.772523   | 7.26E-05  | 0.0016349 |
| XLOC_000970 | 0.161329  | 0.101093        | -0.674321   | 0.544393  | 0.8114    |
| Fam5b_j3    | 3.31705   | 2.83644         | 0           | 1         | 1         |
| Fam5b_j4    | 0.481712  | 0.711158        | 0           | 1         | 1         |
| Fam5b       | 5.44685   | 4.16543         | 0           | 1         | 1         |
| Pappa2_j1   | 0.458764  | 1.70234         | 0           | 1         | 1         |
| Pappa2      | 0.195794  | 0.199444        | 0           | 1         | 1         |
| Cacybp_j2   | 9.34654   | 11.2558         | 0           | 1         | 1         |
| Cacybp      | 29.0348   | 27.347          | 0           | 1         | 1         |
| Rabgap1l    | 5.63561   | 6.32293         | 0.166022    | 0.147873  | 0.476536  |
| Dars2_j1    | 0.284873  | 0.116023        | 0           | 1         | 1         |
| Dars2       | 3.0703    | 2.86305         | 0           | 1         | 1         |
| Klhl20      | 13.0988   | 11.0812         | -0.241317   | 0.0170419 | 0.125976  |
| Prdx6_j1    | 19.3322   | 25.6172         | 0           | 1         | 1         |

|             |          |            |            |           |           |
|-------------|----------|------------|------------|-----------|-----------|
| Prdx6_j2    | 2.68838  | 2.54905    | 0          | 1         | 1         |
| Prdx6       | 44.6945  | 50.7578    | 0          | 1         | 1         |
| AK181631_j2 | 3.76115  | 0.199108   | -4.23955   | 6.68E-08  | 3.82E-06  |
| Al848100_j5 | 0.432837 | 0.129568   | 0          | 1         | 1         |
| Al848100_j7 | 1.20313  | 1.57679    | 0          | 1         | 1         |
| Dnm3        | 20.5873  | 14.4681    | 0          | 1         | 1         |
| Mettl13     | 2.1927   | 1.97482    | 0          | 1         | 1         |
| Prrc2c_j5   | 0.573551 | 0.297493   | 0          | 1         | 1         |
| Prrc2c_j10  | 3.33675  | 3.02388    | 0          | 1         | 1         |
| Fmo4_j4     | 0.242474 | 0.115099   | -1.07495   | 0.100027  | 0.391628  |
| Fmo4_j6     | 0.213442 | 0.0996927  | -1.09828   | 0.120956  | 0.433073  |
| Fmo1_j6     | 1.90891  | 2.54387    | 0          | 1         | 1         |
| Gorab       | 0.461913 | 0.462378   | 0          | 1         | 1         |
| Gorab       | 0.812983 | 1.45955    | 0          | 1         | 1         |
| Blzf1_j2    | 1.25658  | 1.13234    | 0          | 1         | 1         |
| Blzf1_j1    | 1.29418  | 1.23511    | 0          | 1         | 1         |
| Blzf1       | 4.62791  | 3.99165    | 0          | 1         | 1         |
| Atp1b1_j4   | 1.14031  | 0          | 0          | 1         | 1         |
| Atp1b1      | 55.6551  | 45.8277    | 0          | 1         | 1         |
| Xcl1        | 0.163514 | 0.0793983  | -1.04223   | 0.194974  | 0.537285  |
| Sft2d2      | 3.4056   | 3.30542    | -0.0430772 | 0.741551  | 0.909332  |
| Tipr1_j1    | 5.75403  | 3.78611    | 0          | 1         | 1         |
| Tipr1_j2    | 2.1876   | 1.9018     | 0          | 1         | 1         |
| Tipr1       | 10.0244  | 10.7774    | 0          | 1         | 1         |
| Dcaf6       | 1.71818  | 2.04494    | 0.251179   | 0.20235   | 0.545946  |
| Mpzl1       | 4.06575  | 3.28682    | 0          | 1         | 1         |
| Mpzl1       | 3.62315  | 3.78268    | 0          | 1         | 1         |
| Rcsd1       | 2.71493  | 1.00187    | -1.43822   | 7.28E-09  | 5.21E-07  |
| Dusp27_j2   | 0.173117 | 0.268053   | 0.630773   | 0.166129  | 0.502787  |
| Dusp27      | 0.24083  | 0.200915   | -0.261429  | 0.573255  | 0.827482  |
| Pogk        | 0.276098 | 0.1985     | 0          | 1         | 1         |
| XLOC_001011 | 0.134007 | 0.102503   | -0.386647  | 0.679165  | 1         |
| Uck2_j3     | 7.03691  | 9.58569    | 0          | 1         | 1         |
| Uck2        | 6.94711  | 7.4711     | 0          | 1         | 1         |
| Mgst3       | 61.0091  | 48.6514    | -0.326544  | 0.0025717 | 0.0304978 |
| Pbx1_j2     | 0.62249  | 0.00708424 | 0          | 1         | 1         |
| Pbx1_j3     | 0.923708 | 1.12582    | 0          | 1         | 1         |
| Pbx1        | 2.19903  | 1.98653    | 0          | 1         | 1         |
| Rgs4_j4     | 10.3568  | 6.43362    | 0          | 1         | 1         |
| Rgs4        | 66.9816  | 55.471     | 0          | 1         | 1         |
| Hsd17b7     | 7.53544  | 12.925     | 0          | 1         | 1         |
| Ddr2_j4     | 0.513801 | 0.715071   | 0          | 1         | 1         |
| Uap1_j1     | 0.190265 | 0          | 0          | 1         | 1         |
| Uap1        | 9.4514   | 10.1548    | 0          | 1         | 1         |
| Uhmk1_j1    | 71.6218  | 83.466     | 0          | 1         | 1         |
| Uhmk1       | 12.6695  | 10.7754    | 0          | 1         | 1         |
| Gm7694      | 0.436582 | 0.518453   | 0.24796    | 0.201414  | 0.544837  |

|            |           |           |               |           |           |
|------------|-----------|-----------|---------------|-----------|-----------|
| Atf6       | 3.83815   | 3.48478   | 0             | 1         | 1         |
| Dusp12     | 2.75008   | 2.73317   | -0.00889596   | 0.961237  | 0.988989  |
| Dusp12_j1  | 1.54549   | 1.56078   | 0.0142077     | 0.953445  | 0.986504  |
| Fcgr2b     | 0.76531   | 2.55652   | 1.74007       | 4.44E-16  | 1.02E-13  |
| Fcgr3      | 2.88663   | 6.30431   | 1.12695       | 9.73E-11  | 9.92E-09  |
| Sdhc       | 49.458    | 48.1404   | 0             | 1         | 1         |
| Pcp4l1_j3  | 0.339176  | 0.154529  | 0             | 1         | 1         |
| Pcp4l1     | 71.8068   | 56.9339   | 0             | 1         | 1         |
| Tomm40l    | 3.05702   | 3.29088   | 0             | 1         | 1         |
| Ndufs2     | 55.6891   | 51.028    | 0             | 1         | 1         |
| Ppox_j6    | 0.180943  | 0.154047  | -0.232163     | 0.563368  | 0.822542  |
| Ppox_j5    | 0.149132  | 0.120168  | -0.311532     | 0.458595  | 0.761199  |
| Ppox_j4    | 0.0680375 | 0         | -1.79769e+308 | 3.08E-05  | 1         |
| Usp21_j1   | 1.71435   | 2.56799   | 0.582979      | 0.0043264 | 0.0455597 |
| Usp21_j2   | 1.95633   | 1.58335   | -0.305169     | 0.181234  | 0.521107  |
| Nit1       | 2.45397   | 2.76015   | 0             | 1         | 1         |
| Klhdc9     | 1.0524    | 0.848125  | 0             | 1         | 1         |
| Ly9        | 0.332292  | 0.267566  | -0.312557     | 0.489324  | 0.779561  |
| Vangl2     | 0.458672  | 0.42476   | -0.110818     | 0.676005  | 0.878079  |
| Ncstn_j1   | 19.1063   | 20.9004   | 0             | 1         | 1         |
| Pea15a     | 2.60868   | 2.76703   | 0             | 1         | 1         |
| Atp1a2     | 34.5279   | 28.4277   | 0             | 1         | 1         |
| Kcnj9      | 0.174342  | 0.107057  | -0.703548     | 0.275528  | 0.624571  |
| Kcnj9      | 0.283655  | 0.167541  | -0.759625     | 0.116008  | 0.423934  |
| Dusp23     | 2.50963   | 2.56979   | 0.0341716     | 0.862696  | 0.956546  |
| Cadm3      | 0.533667  | 2.34222   | 0             | 1         | 1         |
| Cadm3_j4   | 4.8462    | 2.5197    | 0             | 1         | 1         |
| Grem2_j1   | 0.762653  | 0.589896  | -0.370566     | 0.246683  | 0.594226  |
| Grem2      | 1.00462   | 1.50296   | 0.581157      | 0.0052703 | 0.0527159 |
| Rgs7_j1    | 14.156    | 13.2079   | 0             | 1         | 1         |
| Rgs7       | 1.69972   | 1.27092   | 0             | 1         | 1         |
| Fh1        | 27.6577   | 26.4321   | -0.0653921    | 0.482338  | 0.775514  |
| Opn3       | 3.04668   | 2.75198   | -0.146763     | 0.469465  | 0.767555  |
| Opn3_j2    | 1.92844   | 1.39572   | -0.466427     | 0.0067177 | 0.0637604 |
| Pld5_j4    | 0.145426  | 0.644056  | 0             | 1         | 1         |
| Pld5_j5    | 0.221992  | 0.218168  | 0             | 1         | 1         |
| Cep170_j1  | 5.1158    | 5.35877   | 0             | 1         | 1         |
| Cep170_j16 | 0.991059  | 0.697314  | 0             | 1         | 1         |
| Cep170_j15 | 2.24213   | 2.48284   | 0             | 1         | 1         |
| Akt3_j2    | 0.653306  | 0.608092  | 0             | 1         | 1         |
| Adss       | 31.3444   | 29.0553   | -0.109409     | 0.246416  | 0.594119  |
| Hnrnpu_j1  | 0.928703  | 0.826932  | -0.167447     | 0.344763  | 0.684371  |
| Smyd3_j3   | 0.347866  | 0.455787  | 0.389826      | 0.213612  | 0.558821  |
| Smyd3_j5   | 0.835342  | 0.463177  | -0.850804     | 0.0021357 | 0.0262899 |
| Smyd3_j10  | 0.207024  | 0.232822  | 0.169431      | 0.76083   | 0.91764   |
| Tfb2m_j1   | 0.166574  | 0.0624555 | -1.41526      | 0.0388937 | 0.219934  |
| Ahctf1     | 1.26112   | 1.41106   | 0.16207       | 0.310468  | 0.655211  |

|               |          |                 |            |           |          |
|---------------|----------|-----------------|------------|-----------|----------|
| Psen2         | 13.665   | 12.0501         | 0          | 1         | 1        |
| H3f3a_j1      | 1.12414  | 1.01064         | -0.153561  | 0.325425  | 0.668675 |
| Ephx1_j3      | 0.352342 | 0.251694        | 0          | 1         | 1        |
| Ephx1         | 26.0824  | 22.5903         | 0          | 1         | 1        |
| Nvl_j1        | 1.11357  | 0.920758        | -0.274296  | 0.166514  | 0.502925 |
| Nvl           | 1.79055  | 1.83247         | 0.0333814  | 0.810148  | 0.937876 |
| Nvl_j2        | 3.73165  | 3.43034         | -0.121462  | 0.471815  | 0.769131 |
| Wdr26_j1      | 7.3386   | 7.22268         | 0          | 1         | 1        |
| Wdr26         | 6.04454  | 6.87483         | 0          | 1         | 1        |
| Ccdc121       | 0.127073 | 0.0415506       | -1.61272   | 0.0452431 | 1        |
| Lbr           | 1.68032  | 2.00213         | 0.252803   | 0.147773  | 0.476408 |
| Enah_j1       | 0.749704 | 0 -1.79769e+308 |            | 9.32E-33  | 3.15E-30 |
| Enah          | 18.6419  | 16.2569         | -0.197496  | 0.0234247 | 0.156951 |
| Degs1_j2      | 12.7282  | 3.29403         | 0          | 1         | 1        |
| Degs1         | 87.8295  | 72.6769         | 0          | 1         | 1        |
| Fbxo28        | 10.3862  | 7.84822         | 0          | 1         | 1        |
| Capn2_j8      | 42.2116  | 49.7673         | 0          | 1         | 1        |
| Capn2_j9      | 10.3323  | 8.75223         | 0          | 1         | 1        |
| Hlx           | 0.294441 | 0.34219         | 0.216818   | 0.617103  | 0.849315 |
| Mosc2         | 13.3344  | 13.6746         | 0.0363404  | 0.748057  | 0.912349 |
| C130074G19Rik | 7.97052  | 7.67839         | -0.0538692 | 0.651843  | 0.866416 |
| Mark1_j3      | 0.203631 | 0               | 0          | 1         | 1        |
| Mark1         | 12.7291  | 12.3472         | 0          | 1         | 1        |
| Iars2         | 7.35342  | 6.28407         | 0          | 1         | 1        |
| Lyplal1_j1    | 1.09525  | 1.08708         | -0.0108033 | 0.978676  | 0.993756 |
| Lyplal1       | 4.69789  | 4.55048         | -0.0459932 | 0.796959  | 0.93257  |
| Tgfb2_j2      | 0.229185 | 0 -1.79769e+308 |            | 2.06E-06  | 7.78E-05 |
| Tgfb2         | 0.237575 | 0.300513        | 0.339043   | 0.383832  | 0.71322  |
| Tgfb2_j4      | 0.402443 | 0.269498        | -0.578511  | 0.126385  | 0.442747 |
| Rrp15         | 1.47253  | 1.72152         | 0.225382   | 0.304647  | 0.650106 |
| Spata17_j1    | 0.161042 | 0.125755        | -0.356827  | 0.68128   | 0.880213 |
| Kctd3_j3      | 1.94424  | 0.439496        | -2.14528   | 3.25E-10  | 2.96E-08 |
| Kcnk2_j3      | 0.417544 | 0.283659        | -0.557773  | 0.209896  | 0.554395 |
| Kcnk2         | 0.268188 | 0.090663        | -1.56466   | 0.0163547 | 0.122362 |
| Smyd2_j1      | 5.878    | 5.65205         | 0          | 1         | 1        |
| Smyd2         | 29.7553  | 28.9791         | 0          | 1         | 1        |
| Rps6kc1_j6    | 0.107507 | 0               | 0          | 1         | 1        |
| Rps6kc1       | 3.38045  | 2.73582         | 0          | 1         | 1        |
| Rps6kc1_j2    | 0.98497  | 0.825679        | 0          | 1         | 1        |
| Vash2         | 1.05256  | 1.59635         | 0          | 1         | 1        |
| Mfsd7b_j2     | 3.48711  | 3.43589         | 0          | 1         | 1        |
| Mfsd7b        | 3.254    | 3.47746         | 0          | 1         | 1        |
| Tatdn3_j5     | 0.764241 | 0.855883        | 0.163386   | 0.502043  | 0.786029 |
| Atf3          | 20.3138  | 72.237          | 0          | 1         | 1        |
| Atf3          | 7.73709  | 20.0976         | 0          | 1         | 1        |
| Nenf_j3       | 31.1973  | 41.9764         | 0          | 1         | 1        |
| Nenf          | 13.4896  | 17.4579         | 0          | 1         | 1        |

|              |           |                 |            |           |           |
|--------------|-----------|-----------------|------------|-----------|-----------|
| Rcor3_j3     | 0.822989  | 0.800955        | 0          | 1         | 1         |
| Rcor3_j4     | 0.600977  | 0.489915        | 0          | 1         | 1         |
| Hhat_j1      | 0.164795  | 0.0985053       | -0.742401  | 0.53826   | 0.807862  |
| Hhat_j2      | 0.105439  | 0 -1.79769e+308 | 0.0044747  |           | 1         |
| Hhat_j3      | 0.0718479 | 0.0140975       | -2.34951   | 0.196664  | 1         |
| Hhat         | 0.131919  | 0.072602        | -0.861575  | 0.326732  | 1         |
| Sertad4      | 3.62501   | 3.77458         | 0          | 1         | 1         |
| Syt14        | 0.585117  | 0.164735        | 0          | 1         | 1         |
| Syt14        | 0.107322  | 0               | 0          | 1         | 1         |
| AA408296     | 1.04158   | 1.01318         | -0.0398869 | 0.847698  | 0.951788  |
| AA408296     | 0.33737   | 0.000371339     | -9.82738   | 0.363832  | 0.697943  |
| Hsd11b1      | 0.335249  | 0.187842        | -0.835714  | 0.247849  | 0.595123  |
| G0s2_j1      | 0.120206  | 0.343381        | 1.5143     | 0.156363  | 0.4898    |
| Camk1g       | 11.0885   | 8.52085         | -0.38      | 0.0009247 | 0.0134219 |
| Cr1l_j4      | 1.60173   | 1.15686         | -0.469424  | 0.295808  | 0.642525  |
| Lypla1_j1    | 2.02363   | 0 -1.79769e+308 | 1.65E-20   |           | 4.68E-18  |
| Tcea1_j3     | 0.0176113 | 0.0590394       | 1.74517    | 0.294176  | 1         |
| Tcea1_j2     | 0.0795504 | 0.0563412       | -0.497679  | 0.645165  | 1         |
| Atp6v1h_j2   | 0.0641346 | 0.131084        | 0          | 1         | 1         |
| Atp6v1h_j6   | 24.6077   | 29.1267         | 0          | 1         | 1         |
| Pcmdt1_j1    | 0.729067  | 0.719759        | 0          | 1         | 1         |
| Sgk3_j3      | 0.197902  | 0.359316        | 0          | 1         | 1         |
| Prex2_j9     | 0.0517185 | 0.0174627       | -1.5664    | 0.521068  | 1         |
| Sulf1_j1     | 0.313285  | 0.109735        | 0          | 1         | 1         |
| Sulf1        | 1.37306   | 1.1247          | 0          | 1         | 1         |
| Terf1_j2     | 3.30493   | 3.86535         | 0.225981   | 0.396824  | 0.721313  |
| Tmem14a_j1   | 3.67542   | 4.79691         | 0          | 1         | 1         |
| Lmbrd1       | 13.6821   | 12.9206         | 0          | 1         | 1         |
| Dst_j3       | 0.810486  | 0.744452        | 0          | 1         | 1         |
| Dst_j10      | 3.95022   | 5.28572         | 0          | 1         | 1         |
| Dst_j14      | 11.9342   | 9.25853         | 0          | 1         | 1         |
| Dst_j17      | 31.0252   | 30.7477         | 0          | 1         | 1         |
| Ptpn18_j3    | 1.05945   | 2.57769         | 1.28276    | 1         | 1         |
| mKIAA1112_j1 | 0.245586  | 0.157568        | 0          | 1         | 1         |
| Plekhb2_j1   | 0.065116  | 0 -1.79769e+308 | 0.0266147  |           | 1         |
| Hs6st1_j1    | 0         | 0.703047        | 0          | 1         | 1         |
| Cnm3_j1      | 4.2197    | 4.50814         | 0.0953935  | 0.504622  | 0.787829  |
| Cox5b_j3     | 1.44358   | 1.1624          | -0.312548  | 0.38221   | 0.712312  |
| Mrpl30_j3    | 0.697984  | 0.668046        | 0          | 1         | 1         |
| Rpl31_j6     | 1.53522   | 1.47916         | -0.0536655 | 0.857784  | 0.954916  |
| Map4k4_j1    | 0.595359  | 0.752068        | 0.337102   | 0.262328  | 0.611392  |
| Il1r1        | 0.274724  | 0.725194        | 0          | 1         | 1         |
| Il1r1_j4     | 1.19791   | 2.45847         | 0          | 1         | 1         |
| Nck2_j2      | 2.02926   | 2.84165         | 0.485773   | 0.0177134 | 0.129409  |
| Bivm         | 2.46242   | 2.18186         | 0          | 1         | 1         |
| Bivm_j7      | 1.44179   | 1.64172         | 0          | 1         | 1         |
| Ercc5_j5     | 2.10236   | 1.70158         | 0          | 1         | 1         |

|               |             |           |               |           |           |
|---------------|-------------|-----------|---------------|-----------|-----------|
| XLOC_000094   | 0.166411    | 0.136616  | -0.284624     | 0.785748  | 0.928253  |
| Tmeff2_j2     | 0.912507    | 1.50824   | 0             | 1         | 1         |
| Tmeff2        | 0.697492    | 0.193096  | 0             | 1         | 1         |
| Tmeff2_j5     | 0.784744    | 0.730194  | 0             | 1         | 1         |
| Stat1         | 2.98433     | 2.41436   | 0             | 1         | 1         |
| Stat1_j5      | 0           | 0.0890065 | 0             | 1         | 1         |
| Tmem194b_j3   | 0.212555    | 0.275249  | 0.372902      | 0.333568  | 0.67451   |
| Coq10b_j1     | 10.5236     | 11.166    | 0.0854896     | 0.538921  | 0.80821   |
| Hspe1_j1      | 0.100215    | 0.0649635 | -0.625395     | 0.323837  | 1         |
| Plcl1_j2      | 0.309216    | 0.568435  | 0.878382      | 0.0377351 | 0.215618  |
| 9430016H08Rik | 3.16793     | 3.19431   | 0.0119645     | 0.933596  | 0.979831  |
| Spats2l_j1    | 0.45912     | 0.715486  | 0.640052      | 0.127276  | 0.444526  |
| Spats2l_j4    | 0.492677    | 0.222343  | -1.14786      | 0.103262  | 0.398343  |
| Bzw1_j1       | 0.0889461   | 0.0563558 | -0.658367     | 0.337338  | 1         |
| Ndufb3_j1     | 67.7118     | 64.8662   | -0.0619391    | 0.61643   | 0.848843  |
| Cflar_j1      | 0.0660686   | 0.049552  | -0.415022     | 0.779551  | 1         |
| Casp8         | 0.275767    | 0.448194  | 0.700674      | 0.11459   | 0.421224  |
| Cdk15         | 0.106201    | 0.0090194 | -3.55762      | 0.0207859 | 1         |
| Gm15464       | 2.42688     | 2.93176   | 0.272664      | 0.328492  | 0.671065  |
| Nbeal1_j3     | 0.0900267   | 0.0161138 | -2.48205      | 0.433997  | 1         |
| Nbeal1_j7     | 0.150183    | 0.142761  | -0.0731209    | 0.941146  | 0.982153  |
| Cyp20a1       | 2.03646     | 2.4017    | 0.237993      | 0.377078  | 0.708952  |
| XLOC_000135   | 0.0957559   | 0.151292  | 0             | 1         | 1         |
| Abi2_j6       | 2.17205     | 1.71998   | 0             | 1         | 1         |
| Abi2          | 3.21016     | 3.14279   | 0             | 1         | 1         |
| Fastkd2_j1    | 4.93169     | 5.02328   | 0.0265458     | 0.901647  | 0.968734  |
| Creb1_j1      | 0.632214    | 0.44048   | 0             | 1         | 1         |
| Creb1_j4      | 0.096025    | 0.0933125 | 0             | 1         | 1         |
| Pikfyve_j9    | 0           | 0.137997  | 1.79769e+308  | 0.103384  | 1         |
| Pikfyve_j10   | 0.106843    | 0         | -1.79769e+308 | 0.058029  | 1         |
| Mtap2_j5      | 4.96362     | 4.43576   | -0.162209     | 0.226191  | 0.573417  |
| Mtap2_j13     | 1.49444     | 1.27701   | -0.226836     | 0.194971  | 0.537285  |
| Unc80         | 0.4738      | 0.370911  | 0             | 1         | 1         |
| Rpe_j1        | 7.06282     | 6.53157   | -0.112814     | 0.355612  | 0.691525  |
| Vwc2l_j1      | 0.345801    | 0.480359  | 0.47417       | 0.240052  | 0.587436  |
| Vwc2l_j2      | 0.984713    | 0.172992  | -2.50899      | 3.21E-06  | 0.0001153 |
| AK084284_j1   | 0.175315    | 0.152048  | -0.205418     | 0.77783   | 0.9249    |
| AK044410_j1   | 0.0213745   | 0.0696981 | 1.70523       | 0.577205  | 1         |
| Tmem169_j2    | 0.000518319 | 0.167885  | 0             | 1         | 1         |
| Xrcc5_j1      | 0.762906    | 0.717386  | -0.0887564    | 0.814191  | 0.939438  |
| Xrcc5_j5      | 3.10468     | 2.98437   | -0.0570169    | 0.872204  | 0.959643  |
| Smarcal1_j1   | 0.0745831   | 0.309669  | 2.05381       | 0.0007549 | 0.0114285 |
| Smarcal1_j3   | 3.94399     | 2.47993   | -0.669358     | 3.16E-05  | 0.0008093 |
| Rpl37a        | 0.515062    | 0.551134  | 0.0976579     | 0.701289  | 0.890296  |
| Rpl37a_j1     | 2.38851     | 3.15756   | 0.402697      | 0.109562  | 0.41203   |
| Ctdsp1_j1     | 4.85564     | 4.99635   | 0             | 1         | 1         |
| Rqcd1_j4      | 0.00512618  | 3.45884   | 0             | 1         | 1         |



|                  |           |                 |            |           |           |
|------------------|-----------|-----------------|------------|-----------|-----------|
| Plcd4            | 4.46392   | 3.79594         | 0          | 1         | 1         |
| Stk36_j3         | 0.256261  | 0.315985        | 0.302241   | 0.379681  | 0.710994  |
| mKIAA0173        | 0.0618735 | 0.0699114       | 0.176207   | 0.906738  | 1         |
| Cyp27a1_j4       | 0.315444  | 0.655748        | 1.05576    | 0.0398386 | 0.223291  |
| XLOC_000177      | 0.237553  | 0.28825         | 0.27907    | 0.558647  | 0.82019   |
| Zfand2b          | 14.0309   | 16.2016         | 0.207537   | 0.0954261 | 0.381368  |
| Dnajb2           | 27.4049   | 30.5657         | 0.157482   | 0.0905118 | 0.369579  |
| Dnajb2_j3        | 2.9007    | 2.74621         | -0.07896   | 0.720079  | 0.899526  |
| Speg_j4          | 0.342048  | 0.000323222     | -10.0475   | 0.569482  | 0.82591   |
| Speg_j3          | 0.218155  | 0 -1.79769e+308 |            | 1.50E-06  | 5.87E-05  |
| Speg_j10         | 3.12549   | 3.98618         | 0.350925   | 0.096631  | 0.383949  |
| Speg_j16         | 0.533915  | 0.392214        | -0.44497   | 0.407629  | 0.728185  |
| Stk11ip_j2       | 0.137663  | 0.180463        | 0.390563   | 0.534493  | 0.805659  |
| Slc4a3_j13       | 0.908332  | 0.715781        | 0          | 1         | 1         |
| Slc4a3_j12       | 0.84646   | 1.26306         | 0          | 1         | 1         |
| Sgpp2_j2         | 0.276879  | 0.803898        | 1.53776    | 6.88E-07  | 3.00E-05  |
| Mogat1_j2        | 0.168398  | 0.100472        | -0.745082  | 0.545971  | 0.812777  |
| Kcne4_j1         | 0.273158  | 0.356476        | 0.384071   | 0.417528  | 0.734635  |
| 9430031J16Rik    | 0.171025  | 0 -1.79769e+308 |            | 4.14E-07  | 1.89E-05  |
| Rhbdd1           | 5.13171   | 4.6243          | -0.150207  | 0.264887  | 0.613816  |
| Mff_j5           | 13.3631   | 8.84809         | 0          | 1         | 1         |
| Mff_j4           | 18.64     | 14.558          | 0          | 1         | 1         |
| Agfg1_j3         | 3.79124   | 2.23934         | -0.759594  | 1.34E-07  | 6.98E-06  |
| Sp100            | 0.533395  | 0.549292        | 0.0423673  | 0.911631  | 0.972265  |
| Sp100_j10        | 0.362504  | 0.329091        | -0.139509  | 0.81825   | 0.941034  |
| Psm1_j2          | 0.177776  | 0.398217        | 0          | 1         | 1         |
| Ptma_j2          | 0.38585   | 0.510309        | 0.403331   | 0.324368  | 0.66746   |
| Cops7b_j2        | 0.322339  | 0.330495        | 0          | 1         | 1         |
| Dis3l2_j3        | 2.17403   | 2.90405         | 0          | 1         | 1         |
| AK006434         | 0.0688186 | 0.301747        | 2.13247    | 0.0575954 | 0.281219  |
| Eif4e2_j3        | 7.23697   | 6.26845         | -0.207275  | 0.109807  | 0.412328  |
| Gigyf2_j3        | 0.387918  | 0.451144        | 0          | 1         | 1         |
| Ugt1a1           | 1.03835   | 0 -1.79769e+308 |            | 0.0004743 | 0.0077879 |
| Lrrfip1_j5       | 2.0232    | 2.94982         | 0          | 1         | 1         |
| Asb1_j2          | 12.7536   | 13.9667         | 0.131084   | 0.167107  | 0.503397  |
| Gpc1_j1          | 0.4047    | 0.412446        | 0          | 1         | 1         |
| Rnpepl1_j5       | 0         | 0.194622        | 0          | 1         | 1         |
| Capn10           | 4.05575   | 3.34095         | -0.279711  | 0.121965  | 0.434908  |
| Gpr35_j4         | 0.242784  | 0.3554          | 0          | 1         | 1         |
| Sned1_j3         | 0.0782342 | 0.0754787       | -0.0517289 | 0.916187  | 1         |
| Ing5_j2          | 0.10988   | 0.0242699       | -2.17868   | 0.108379  | 1         |
| AK007349_j1      | 0.122277  | 0.246929        | 1.01394    | 0.296868  | 0.643452  |
| AK144617_j1      | 0.365194  | 0.0774834       | -2.2367    | 0.193381  | 0.535696  |
| 2310035C23Rik_j2 | 2.15185   | 2.67271         | 0.312727   | 0.0954    | 0.381326  |
| 2310035C23Rik_j5 | 4.16078   | 4.48709         | 0.108926   | 0.761555  | 0.917949  |
| Tnfrsf11a_j3     | 1.13705   | 1.31341         | 0          | 1         | 1         |
| Zcchc2_j6        | 0.374759  | 0.305113        | -0.296623  | 0.43065   | 0.743283  |

|                  |           |            |               |           |           |
|------------------|-----------|------------|---------------|-----------|-----------|
| Serpinb5_j6      | 0         | 0.090018   | 1.79769e+308  | 0.0358703 | 1         |
| Clasp1_j1        | 5.3923    | 4.76853    | 0             | 1         | 1         |
| XLOC_000287      | 0.130941  | 0.0883656  | -0.567362     | 0.543484  | 1         |
| Ubxn4_j2         | 7.11191   | 7.80857    | 0             | 1         | 1         |
| XLOC_000306      | 0.460944  | 0.443038   | -0.0571629    | 0.940405  | 0.981888  |
| AA986860         | 1.20524   | 0.982888   | -0.294226     | 0.219755  | 0.566404  |
| AA986860_j1      | 1.05645   | 1.01963    | -0.0511729    | 0.856267  | 0.954566  |
| Fam72a           | 0.764312  | 0.663253   | 0             | 1         | 1         |
| Rab7b            | 0.123372  | 0.139277   | 0.17494       | 0.820582  | 1         |
| 5430435G22Rik    | 0.0880686 | 0.296125   | 1.74951       | 0.0113832 | 0.0943512 |
| Slc45a3_j1       | 0.206797  | 0.181538   | -0.187941     | 0.818229  | 0.941034  |
| Lemd1            | 0.0847854 | 0.111148   | 0.390589      | 0.763903  | 1         |
| Dstyk            | 1.87725   | 1.8727     | 0             | 1         | 1         |
| Rbbp5_j3         | 1.12373   | 1.35589    | 0             | 1         | 1         |
| Lrrn2_j2         | 0.676776  | 2.88627    | 0             | 1         | 1         |
| Etnk2            | 0.0865174 | 0.103957   | 0.264922      | 0.79991   | 1         |
| Chi3l1_j2        | 0.0770234 | 0.0625052  | -0.30132      | 0.832009  | 1         |
| Mybph_j1         | 0.413863  | 0.199496   | 0             | 1         | 1         |
| Cyb5r1_j1        | 3.81968   | 5.12395    | 0             | 1         | 1         |
| Cyb5r1_j2        | 7.07932   | 12.5828    | 0             | 1         | 1         |
| Syt2_j2          | 8.98432   | 10.1017    | 0             | 1         | 1         |
| Csrp1_j3         | 0.554294  | 1.48567    | 0             | 1         | 1         |
| Tnni1_j4         | 0.0519336 | 0.0269894  | -0.944274     | 0.727094  | 1         |
| Kif21b_j6        | 0.971632  | 0.571681   | 0             | 1         | 1         |
| XLOC_000355      | 0.114413  | 0.0839189  | -0.447188     | 0.55993   | 1         |
| Dennd1b_j4       | 0.426252  | 0.284897   | -0.581266     | 0.566492  | 0.824486  |
| Dennd1b_j5       | 0.162112  | 0.136773   | -0.24521      | 0.787482  | 0.929133  |
| Kcnt2_j8         | 0.337467  | 0.325894   | -0.0503413    | 0.871599  | 0.959237  |
| Glrx2_j1         | 0         | 0.235483   | 1.79769e+308  | 0.0035045 | 0.0389704 |
| Uchl5_j2         | 0.0774398 | 0.0812644  | 0             | 1         | 1         |
| lvns1abp         | 2.101     | 0          | -1.79769e+308 | 1.74E-36  | 6.01E-34  |
| lvns1abp         | 13.6586   | 15.5441    | 0.186553      | 0.0564083 | 0.277929  |
| 1190005F20Rik_j2 | 0.30584   | 0.513563   | 0.747764      | 0.119531  | 0.430212  |
| 1190005F20Rik_j1 | 1.00123   | 1.14919    | 0.198844      | 0.541511  | 0.8095    |
| Edem3            | 1.51569   | 1.65009    | 0             | 1         | 1         |
| Edem3            | 3.50344   | 3.824      | 0             | 1         | 1         |
| Ncf2_j1          | 0.260019  | 0.189353   | -0.457542     | 0.634185  | 0.858133  |
| Ncf2_j5          | 0.0827282 | 0.0389227  | 0             | 1         | 1         |
| Rgs8_j6          | 0.0786927 | 0.00879875 | 0             | 1         | 1         |
| XLOC_000383      | 0.0677978 | 0.103387   | 0             | 1         | 1         |
| Stx6_j1          | 1.82375   | 1.81612    | -0.00604983   | 0.979629  | 0.994006  |
| Tor1aip2         | 17.5438   | 21.084     | 0             | 1         | 1         |
| XLOC_000397      | 0.170703  | 0.144654   | -0.238884     | 0.926418  | 0.977218  |
| Sec16b_j7        | 0.11944   | 7.86E-05   | -10.5693      | 0.929407  | 1         |
| Sec16b_j9        | 0.0567227 | 0.0222591  | -1.34953      | 0.443185  | 1         |
| Rfwd2_j5         | 1.30357   | 0.505633   | -1.3663       | 0.0776377 | 0.337244  |
| Rfwd2_j12        | 0.410733  | 0.366724   | -0.163506     | 0.872536  | 0.959686  |

|                  |           |           |              |           |           |
|------------------|-----------|-----------|--------------|-----------|-----------|
| Tnr_j6           | 0.355903  | 0.253128  | -0.49162     | 0.294741  | 0.641359  |
| Rc3h1_j1         | 0.473331  | 0.938552  | 0            | 1         | 1         |
| Cenpl            | 0.568471  | 0.664655  | 0            | 1         | 1         |
| Cenpl_j1         | 0.105486  | 0.146156  | 0            | 1         | 1         |
| Cenpl            | 0.392301  | 0.270149  | 0            | 1         | 1         |
| Ankrd45_j3       | 0.3618    | 0         | 0            | 1         | 1         |
| Pigc             | 0.318302  | 0.418978  | 0.39648      | 0.242654  | 0.590089  |
| Kifap3           | 10.9337   | 4.53438   | 0            | 1         | 1         |
| Scyl3            | 0.816835  | 1.08324   | 0            | 1         | 1         |
| 4930455F23Rik_j1 | 9.4644    | 9.81316   | 0            | 1         | 1         |
| AK042927_j2      | 0.2894    | 0.152117  | -0.927886    | 0.0865971 | 0.359682  |
| Gpr161_j3        | 2.91749   | 3.19841   | 0            | 1         | 1         |
| Creg1_j1         | 0.811117  | 0.787016  | -0.0435165   | 0.957287  | 0.987778  |
| XLOC_000434      | 0.0383844 | 0.10876   | 1.50255      | 0.505957  | 1         |
| Aldh9a1_j1       | 6.73604   | 7.61831   | 0            | 1         | 1         |
| 1700084C01Rik    | 1.36E-05  | 0.0607912 | 12.1301      | 0.992779  | 1         |
| AK014032         | 0.51603   | 1.11531   | 0            | 1         | 1         |
| 1700009P17Rik_j2 | 0         | 0.17918   | 0            | 1         | 1         |
| Nr1i3_j4         | 5.49302   | 5.68975   | 0            | 1         | 1         |
| Usf1_j2          | 1.32418   | 2.32495   | 0            | 1         | 1         |
| Copa_j1          | 14.4001   | 13.7554   | 0            | 1         | 1         |
| Copa_j5          | 0         | 0.136185  | 0            | 1         | 1         |
| Slamf9_j1        | 0.476748  | 0.10492   | -2.18394     | 0.0524272 | 0.265923  |
| Igsf9_j7         | 1.98E-05  | 0.061565  | 11.5988      | 0.977339  | 1         |
| Igsf9_j6         | 0.189986  | 0.207957  | 0.130392     | 0.842377  | 0.950233  |
| Tagln2_j3        | 0         | 0.143346  | 1.79769e+308 | 0.113544  | 1         |
| Aim2_j9          | 0         | 0.111518  | 1.79769e+308 | 0.0795328 | 1         |
| rp58_j1          | 0.436863  | 0         | 0            | 1         | 1         |
| EG545391_j2      | 0.0387354 | 0.10752   | 1.47288      | 0.350124  | 1         |
| Pppde1_j5        | 0.886636  | 2.01429   | 0            | 1         | 1         |
| Fam36a_j1        | 2.11814   | 1.98633   | -0.0926922   | 0.509502  | 0.790813  |
| Kif26b_j1        | 0.0534206 | 0.061257  | 0            | 1         | 1         |
| Kif26b_j2        | 3.20257   | 2.38505   | 0            | 1         | 1         |
| Cnst_j4          | 12.0933   | 8.63451   | -0.48602     | 2.98E-05  | 0.0007692 |
| Cnst_j5          | 41.619    | 48.0908   | 0.20852      | 0.0171326 | 0.126474  |
| XLOC_000490      | 0.154261  | 0.26686   | 0.790711     | 0.502303  | 0.78635   |
| Itpkb_j9         | 5.01035   | 12.133    | 0            | 1         | 1         |
| Cnih4_j2         | 7.92652   | 7.54556   | -0.0710594   | 0.558553  | 0.820132  |
| XLOC_000504      | 0.152507  | 0.0420973 | -1.85708     | 0.462236  | 0.763223  |
| Tlr5_j3          | 0.119106  | 0.145411  | 0.287899     | 0.742584  | 1         |
| Bpnt1_j1         | 24.4542   | 22.7867   | -0.101896    | 0.293389  | 0.640286  |
| Eprs_j4          | 7.39138   | 9.06704   | 0            | 1         | 1         |
| XLOC_000522      | 0.155301  | 0.171288  | 0.141357     | 0.869233  | 0.958408  |
| Gpatch2          | 0.190635  | 0.403429  | 1.0815       | 0.0101271 | 0.0863188 |
| Angel2_j2        | 1.9906    | 1.89026   | -0.0746216   | 0.713418  | 0.896209  |
| Angel2_j1        | 2.34823   | 2.91145   | 0.310166     | 0.0872247 | 0.361215  |
| Angel2_j3        | 1.33301   | 1.17406   | -0.183181    | 0.453432  | 0.758064  |

|                  |           |           |               |           |           |
|------------------|-----------|-----------|---------------|-----------|-----------|
| Batf3            | 0.176531  | 0.8066    | 2.19193       | 0.0033078 | 0.0372361 |
| XLOC_000533      | 0.190848  | 0.138459  | -0.462965     | 0.56944   | 0.82591   |
| Ints7_j1         | 0.0340399 | 0.0699785 | 1.03969       | 0.290428  | 1         |
| Lpgat1           | 3.53183   | 4.12195   | 0             | 1         | 1         |
| Lpgat1_j4        | 8.96277   | 7.51775   | 0             | 1         | 1         |
| Slc30a1_j1       | 2.40582   | 2.62824   | 0.127568      | 0.416849  | 0.733932  |
| Gm10516_j4       | 3.28679   | 2.94364   | 0             | 1         | 1         |
| Kcnh1            | 3.31491   | 3.12737   | 0             | 1         | 1         |
| XLOC_000544      | 0.173346  | 0.172868  | -0.00398799   | 0.995879  | 0.998851  |
| Lamb3_j1         | 0.0459615 | 0.146087  | 1.66833       | 0.133527  | 1         |
| Lamb3_j7         | 0.0126763 | 0.124591  | 3.29699       | 0.362176  | 1         |
| XLOC_000548      | 0         | 0.081409  | 1.79769e+308  | 0.014143  | 1         |
| mKIAA1889        | 0.0742891 | 0.0910258 | 0.293125      | 0.570265  | 1         |
| 4732440D04Rik    | 0.193652  | 0.164499  | -0.235386     | 0.675153  | 0.877609  |
| Sntg1_j3         | 0.724526  | 0.455242  | -0.670404     | 0.0691369 | 0.31527   |
| 2610203C22Rik_j3 | 0.218368  | 0.134195  | -0.702427     | 0.315566  | 0.659626  |
| Cops5_j1         | 86.7357   | 96.1105   | 0.148069      | 0.119226  | 0.429562  |
| Ncoa2_j6         | 0.548855  | 0.468388  | 0             | 1         | 1         |
| Tram1_j2         | 2.2895    | 1.91247   | 0             | 1         | 1         |
| Lactb2_j1        | 10.2206   | 9.61804   | -0.0876592    | 0.472876  | 0.769762  |
| Trpa1_j1         | 0         | 0.254826  | 1.79769e+308  | 7.34E-05  | 0.0016482 |
| Gm106_j1         | 1.35465   | 1.7852    | 0.398165      | 0.180236  | 0.519878  |
| Rpl7_j9          | 28.2329   | 32.0754   | 0.184087      | 0.119765  | 0.430734  |
| Stau2_j1         | 1.41235   | 0.3985    | 0             | 1         | 1         |
| Ube2w_j2         | 18.9731   | 19.7352   | 0.0568119     | 0.64947   | 0.865315  |
| Tceb1_j3         | 22.8116   | 20.7372   | -0.137547     | 0.13391   | 0.455393  |
| Jph1_j1          | 0.128665  | 0.0588559 | -1.12836      | 0.195384  | 1         |
| 6720483E21Rik_j1 | 0.575438  | 0.650222  | 0             | 1         | 1         |
| XLOC_000599      | 0.0181974 | 0.050612  | 0             | 1         | 1         |
| Rims1_j22        | 0         | 0.474679  | 1.79769e+308  | 0.0002129 | 0.0040395 |
| Ogfrl1_j3        | 0.230182  | 0.962328  | 0             | 1         | 1         |
| Fam135a_j2       | 0.0498279 | 0         | -1.79769e+308 | 0.0052603 | 1         |
| Bai3_j1          | 1.64379   | 0.442316  | 0             | 1         | 1         |
| Prim2_j4         | 0.191599  | 0.190145  | -0.0109879    | 0.990957  | 0.99726   |
| Zfp451_j2        | 0.799871  | 0.544404  | 0             | 1         | 1         |
| Bend6_j2         | 0.0612702 | 0         | 0             | 1         | 1         |
| Ccdc115_j3       | 4.11999   | 6.18666   | 0             | 1         | 1         |
| Uggt1_j1         | 0.813856  | 0.635368  | 0             | 1         | 1         |
| 4632411B12Rik_j2 | 2.96279   | 2.69905   | 0             | 1         | 1         |
| Ankrd39          | 4.48988   | 3.62217   | -0.309823     | 0.10231   | 0.396354  |
| Sema4c_j7        | 0.0358873 | 0.107863  | 0             | 1         | 1         |
| Sema4c_j8        | 0.323847  | 0.288402  | 0             | 1         | 1         |
| Actr1b_j4        | 1.6134    | 3.84735   | 0             | 1         | 1         |
| 6330578E17Rik_j1 | 8.29149   | 3.13644   | 0             | 1         | 1         |
| Mgat4a           | 4.12595   | 3.47353   | 0             | 1         | 1         |
| 2010300C02Rik_j2 | 0.0783062 | 0         | -1.79769e+308 | 0.0676961 | 1         |
| 2010300C02Rik_j1 | 0.115111  | 0.38429   | 1.73917       | 0.0662023 | 0.307235  |

|                  |           |           |              |           |           |
|------------------|-----------|-----------|--------------|-----------|-----------|
| 2010300C02Rik_j3 | 0.100632  | 0.0131922 | -2.93133     | 0.0766953 | 1         |
| Tsga10_j5        | 1.13365   | 1.43365   | 0            | 1         | 1         |
| Aff3_j5          | 1.47463   | 1.1516    | 0            | 1         | 1         |
| Chst10_j1        | 0.223643  | 6.50E-05  | 0            | 1         | 1         |
| Rnf149           | 8.30541   | 7.26323   | -0.193441    | 0.141614  | 0.468162  |
| Tgfbrap1         | 4.85595   | 3.98049   | 0            | 1         | 1         |
| Uxs1_j2          | 0.0462756 | 2.46606   | 0            | 1         | 1         |
| Kdelc1           | 0.430961  | 0.670986  | 0            | 1         | 1         |
| Col5a2_j3        | 2.3504    | 3.2356    | 0            | 1         | 1         |
| Myo1b_j5         | 1.16684   | 1.39896   | 0            | 1         | 1         |
| Gm3940           | 0.731003  | 0.856854  | 0.229171     | 0.641476  | 0.86175   |
| Mfsd6_j3         | 6.14831   | 6.35012   | 0            | 1         | 1         |
| Pms1_j8          | 0.0268367 | 0.104147  | 1.95634      | 0.392625  | 1         |
| Hecw2_j6         | 0.706796  | 0.648917  | 0            | 1         | 1         |
| Ankrd44          | 0.118762  | 0.0490403 | -1.27603     | 0.244622  | 1         |
| Ankrd44_j6       | 0.310766  | 0.257566  | -0.270882    | 0.676295  | 0.878168  |
| Sf3b1_j1         | 0         | 0.889321  | 0            | 1         | 1         |
| Hspd1_j2         | 1.47423   | 1.15939   | -0.346592    | 0.315111  | 0.659071  |
| Kctd18           | 1.03522   | 0.971388  | -0.0918157   | 0.743499  | 0.910278  |
| Kctd18           | 2.08569   | 2.21722   | 0.0882252    | 0.68603   | 0.882933  |
| Clk1_j4          | 5.40791   | 6.09001   | 0            | 1         | 1         |
| Fam126b          | 0.540943  | 0.360896  | -0.583892    | 0.0381364 | 0.21702   |
| Trak2_j1         | 4.84703   | 5.61846   | 0            | 1         | 1         |
| Sumo1_j3         | 0.340695  | 0.283055  | -0.267397    | 0.664267  | 0.87286   |
| Ica1l            | 1.21767   | 0.703741  | -0.791007    | 0.0079251 | 0.0721158 |
| Wdr12_j1         | 1.26884   | 1.44274   | 0.185302     | 0.491712  | 0.780573  |
| Gm11575          | 2.86625   | 2.13067   | -0.427854    | 0.376028  | 0.708112  |
| XLOC_000710      | 0         | 0.368996  | 1.79769e+308 | 0.0220846 | 0.150909  |
| Ino80d_j5        | 0.235426  | 0.112936  | -1.05977     | 0.335904  | 0.676459  |
| Ndufs1           | 53.9196   | 48.2477   | 0            | 1         | 1         |
| Mdh1b            | 0.258122  | 0.196262  | -0.395276    | 0.492463  | 0.781084  |
| Klf7             | 11.7898   | 14.3648   | 0            | 1         | 1         |
| Klf7_j3          | 1.0485    | 0.273876  | 0            | 1         | 1         |
| Plekhn3_j4       | 3.54476   | 4.23232   | 0            | 1         | 1         |
| Lancl1           | 2.059     | 2.53514   | 0.300121     | 0.0940954 | 0.377895  |
| Tns1_j3          | 0.245904  | 0.161017  | 0            | 1         | 1         |
| Tns1_j4          | 1.19218   | 0.838793  | 0            | 1         | 1         |
| Tns1_j5          | 0.463017  | 0.549363  | 0            | 1         | 1         |
| Aamp_j3          | 10.0237   | 10.6748   | 0.0908023    | 0.672094  | 0.87616   |
| XLOC_000750      | 0.180702  | 0.135677  | -0.413434    | 0.455845  | 0.759596  |
| Nhej1_j2         | 0.840212  | 0.70303   | -0.257166    | 0.692771  | 0.8862    |
| 1810031K17Rik_j1 | 8.68615   | 9.4959    | 0.128589     | 0.448996  | 0.755281  |
| Abcb6_j2         | 0.60498   | 0.863846  | 0.513887     | 0.139801  | 0.465192  |
| Abcb6_j1         | 5.59221   | 5.88861   | 0.0745098    | 0.596302  | 0.83935   |
| Atg9a_j3         | 1.75201   | 0.884902  | 0            | 1         | 1         |
| Tuba4a           | 20.5455   | 15.5006   | 0            | 1         | 1         |
| Ptprn_j1         | 12.0548   | 18.555    | 0            | 1         | 1         |

|              |             |                 |            |           |           |
|--------------|-------------|-----------------|------------|-----------|-----------|
| Ptprn_j2     | 2.84105     | 2.96822         | 0          | 1         | 1         |
| Ptprn_j3     | 0.181211    | 0.646799        | 0          | 1         | 1         |
| Dnpep_j3     | 10.4959     | 13.4591         | 0          | 1         | 1         |
| Chpf         | 4.16511     | 4.41974         | 0          | 1         | 1         |
| Scg2         | 28.1597     | 28.0186         | 0          | 1         | 1         |
| Wdfy1_j3     | 0.871753    | 1.2009          | 0          | 1         | 1         |
| Serpine2_j2  | 1.28098     | 2.13591         | 0.737601   | 0.0188001 | 0.135159  |
| Cul3_j2      | 24.0389     | 24.4146         | 0          | 1         | 1         |
| Dock10_j3    | 0.190957    | 0.0657317       | 0          | 1         | 1         |
| Dock10_j7    | 0.152766    | 0.0893782       | 0          | 1         | 1         |
| Trip12_j4    | 4.64425     | 5.75734         | 0          | 1         | 1         |
| Sp110_j4     | 0.0773341   | 0.183851        | 1.24936    | 0.382304  | 0.712346  |
| Pde6d_j1     | 21.1209     | 24.3463         | 0          | 1         | 1         |
| Ecel1        | 8.10015     | 26.2188         | 1.69458    | 0         | 0         |
| Per2_j1      | 0.307883    | 0.332173        | 0.109551   | 0.805905  | 0.935848  |
| AK017177     | 0.455336    | 0.419416        | -0.11855   | 0.774874  | 0.923741  |
| Kif1a_j7     | 5.78173     | 10.286          | 0          | 1         | 1         |
| Kif1a_j5     | 0.450302    | 24.8654         | 0          | 1         | 1         |
| Pask_j7      | 0.000117301 | 0.0835523       | 9.47633    | 0.836135  | 1         |
| Pask_j6      | 0.0545788   | 0 -1.79769e+308 | 0.0101431  | 0.0101431 | 1         |
| Stk25        | 3.4136      | 0.396376        | 0          | 1         | 1         |
| Dtymk        | 2.89009     | 3.49139         | 0.272685   | 0.280609  | 0.629166  |
| Dtymk        | 5.57114     | 6.20901         | 0.15639    | 0.439624  | 0.749194  |
| D1Ert622e_j1 | 2.04652     | 1.89501         | 0          | 1         | 1         |
| D1Ert622e    | 0.641167    | 0.931556        | 0          | 1         | 1         |
| Ppip5k2_j1   | 3.80578     | 3.33377         | 0          | 1         | 1         |
| Ppip5k2_j6   | 1.37195     | 1.01103         | 0          | 1         | 1         |
| Pam_j6       | 5.23762     | 6.25447         | 0          | 1         | 1         |
| XLOC_000829  | 0.103958    | 0.114907        | 0.144474   | 0.859632  | 1         |
| Pign_j3      | 0.345791    | 0.075351        | -2.1982    | 0.0010647 | 0.0150126 |
| Bcl2_j3      | 0.814537    | 0.94759         | 0.218283   | 0.652906  | 0.867181  |
| Vps4b_j2     | 12.4658     | 12.2322         | -0.0272815 | 0.81473   | 0.939556  |
| Gm8080_j1    | 0.167864    | 0.190686        | 0.183905   | 0.788264  | 0.929506  |
| Cdh19_j5     | 7.2474      | 8.74468         | 0.270942   | 0.0332908 | 0.199071  |
| Cdh19        | 4.80504     | 3.75128         | -0.357164  | 0.0152122 | 0.116096  |
| Dsel_j4      | 3.41315     | 2.93985         | -0.215362  | 0.117532  | 0.426531  |
| XLOC_000841  | 0.225164    | 0.094064        | -1.25926   | 0.264484  | 0.613354  |
| Ralb         | 5.19659     | 6.71304         | 0          | 1         | 1         |
| Ralb_j5      | 0.397527    | 0.00249006      | 0          | 1         | 1         |
| Dbi_j4       | 0.319375    | 0.116308        | -1.4573    | 0.347124  | 0.685818  |
| Steap3       | 1.08552     | 1.7681          | 0.703811   | 0.004008  | 0.0429433 |
| Insig2_j2    | 0.441874    | 0.511469        | 0          | 1         | 1         |
| Ddx18_j4     | 0.125541    | 0.0867983       | -0.532423  | 0.785293  | 1         |
| Ddx18_j9     | 0.161409    | 0.145134        | -0.153342  | 0.904126  | 0.9694    |
| Dpp10_j4     | 2.57652     | 3.07714         | 0          | 1         | 1         |
| Actr3_j4     | 0.455484    | 0.523079        | 0.199626   | 0.698062  | 0.888723  |
| Tmem163_j2   | 2.5862      | 2.93507         | 0          | 1         | 1         |

|                       |             |           |              |           |           |
|-----------------------|-------------|-----------|--------------|-----------|-----------|
| Cd55                  | 94.1206     | 71.2669   | -0.401278    | 3.37E-06  | 0.0001202 |
| Pfkfb2_j3             | 0.464929    | 0.507422  | 0            | 1         | 1         |
| Pfkfb2_j2             | 2.86034     | 1.91839   | 0            | 1         | 1         |
| Mapkapk2_j1           | 1.57186     | 2.28269   | 0.53826      | 0.0450926 | 0.242851  |
| Dyrk3_j1              | 0.0684022   | 0.410891  | 2.58664      | 0.0058191 | 0.057111  |
| Rassf5_j2             | 20.8677     | 15.4143   | 0            | 1         | 1         |
| Srgap2                | 0.214269    | 0.180553  | 0            | 1         | 1         |
| Srgap2_j6             | 3.79327     | 3.99105   | 0            | 1         | 1         |
| Tmcc2_j1              | 5.00228     | 4.56733   | 0            | 1         | 1         |
| Cntn2_j3              | 2.41839     | 2.80066   | 0            | 1         | 1         |
| Nfasc_j5              | 0.435369    | 0.423026  | 0            | 1         | 1         |
| Mdm4_j2               | 0           | 0.473342  | 0            | 1         | 1         |
| Mdm4_j3               | 0           | 0.15281   | 0            | 1         | 1         |
| Sox13_j4              | 0.0312216   | 0.289144  | 0            | 1         | 1         |
| Snrpe_j3              | 0.819944    | 0.574023  | -0.514416    | 0.384513  | 0.713264  |
| Atp2b4_j10            | 1.99138     | 2.046     | 0            | 1         | 1         |
| Atp2b4_j4             | 2.12799     | 0.274563  | 0            | 1         | 1         |
| Prelp_j1              | 0           | 0.335896  | 1.79769e+308 | 2.04E-05  | 0.0005634 |
| Adora1_j1             | 0.267406    | 0.362837  | 0            | 1         | 1         |
| Ppfia4_j1             | 1.97288     | 2.21164   | 0            | 1         | 1         |
| Ppfia4_j2             | 2.84522     | 1.86346   | 0            | 1         | 1         |
| Ppfia4_j3             | 0.000223649 | 1.14649   | 0            | 1         | 1         |
| Tmem183a_j1           | 8.33638     | 9.09981   | 0            | 1         | 1         |
| Tmem183a              | 12.0469     | 13.1301   | 0            | 1         | 1         |
| Shisa4_j6             | 8.59329     | 11.3944   | 0            | 1         | 1         |
| Ipo9_j1               | 5.45991     | 5.44122   | 0            | 1         | 1         |
| Nav1_j5               | 1.68033     | 4.75863   | 0            | 1         | 1         |
| Igfn1_j6              | 0.117403    | 0.232901  | 0.988248     | 0.0975669 | 0.385935  |
| Camsap1l1_j4          | 0.000210468 | 0.168512  | 0            | 1         | 1         |
| Nek7_j1               | 4.01833     | 3.58441   | 0            | 1         | 1         |
| 2310009B15Rik_j1      | 1.35159     | 1.21339   | -0.155605    | 0.746979  | 0.911835  |
| Trove2_j1             | 0.0543469   | 0.0324284 | 0            | 1         | 1         |
| Hmcn1_j6              | 0.163012    | 0.284649  | 0.80421      | 0.173668  | 0.511525  |
| XLOC_000933           | 0.573603    | 0.423675  | -0.437095    | 0.453063  | 0.757983  |
| 1700025G04Rik         | 2.45499     | 2.06961   | 0            | 1         | 1         |
| ENSMUSG00000073540_j4 | 2.25945     | 4.16536   | 0            | 1         | 1         |
| Rgl1_j2               | 3.55186     | 2.89623   | 0            | 1         | 1         |
| Rgl1_j3               | 5.39213     | 5.51454   | 0            | 1         | 1         |
| Dhx9_j1               | 6.03609     | 6.44146   | 0            | 1         | 1         |
| Dhx9_j4               | 0.331934    | 2.25231   | 0            | 1         | 1         |
| Dhx9                  | 1.84982     | 0.553543  | 0            | 1         | 1         |
| Mr1_j1                | 0           | 0.0914765 | 1.79769e+308 | 0.0277876 | 1         |
| Mr1                   | 0.683369    | 1.22851   | 0.846179     | 0.0015041 | 0.0197772 |
| BC034090_j1           | 0.65223     | 0.476272  | -0.453594    | 0.410518  | 0.730318  |
| BC034090_j5           | 0.272142    | 0.130968  | -1.05515     | 0.0854736 | 0.356994  |
| Qsox1_j1              | 0           | 1.12601   | 1.79769e+308 | 2.39E-06  | 8.88E-05  |
| Cep350_j3             | 1.93391     | 1.97238   | 0            | 1         | 1         |

|             |            |             |              |           |           |
|-------------|------------|-------------|--------------|-----------|-----------|
| Tor1aip1    | 1.46008    | 1.37908     | -0.0823442   | 0.642026  | 0.86192   |
| Soat1       | 5.24396    | 4.34603     | -0.270958    | 0.010919  | 0.0913427 |
| Soat1_j2    | 0          | 0.193665    | 1.79769e+308 | 9.51E-06  | 0.000297  |
| Tor3a       | 1.60611    | 2.1434      | 0.416332     | 0.0121749 | 0.0993318 |
| Fam20b_j2   | 1.43424    | 2.28943     | 0            | 1         | 1         |
| Fam5b_j2    | 0.114208   | 0.418428    | 0            | 1         | 1         |
| Cacybp_j1   | 36.1965    | 32.6361     | 0            | 1         | 1         |
| Rabgap1l_j1 | 0          | 0.418162    | 1.79769e+308 | 1.62E-07  | 8.18E-06  |
| Rabgap1l    | 10.5467    | 9.27364     | -0.18558     | 0.0938023 | 0.377323  |
| Zbtb37_j4   | 1.38771    | 2.48075     | 0.838073     | 1.64E-06  | 6.33E-05  |
| Dars2_j2    | 2.14434    | 2.69645     | 0            | 1         | 1         |
| Al848100    | 1.47736    | 1.63638     | 0            | 1         | 1         |
| Dnm3_j1     | 39.1113    | 32.6306     | 0            | 1         | 1         |
| Dnm3        | 1.65524    | 1.83163     | 0            | 1         | 1         |
| Mettl13_j1  | 1.24146    | 1.68331     | 0            | 1         | 1         |
| Prcc2c_j6   | 3.32782    | 2.7159      | 0            | 1         | 1         |
| Prcc2c_j7   | 0.00155509 | 0.704842    | 0            | 1         | 1         |
| Fmo4_j3     | 0.264256   | 0.242949    | -0.121283    | 0.843325  | 0.950448  |
| Fmo1_j3     | 0.244837   | 0.183006    | 0            | 1         | 1         |
| Fmo1_j4     | 3.17885    | 2.16012     | 0            | 1         | 1         |
| Fmo2        | 0.692882   | 0.574582    | 0            | 1         | 1         |
| Atp1b1_j1   | 75.7606    | 71.0377     | 0            | 1         | 1         |
| Sft2d2      | 1.03431    | 1.2584      | 0.282913     | 0.189084  | 0.530662  |
| Tipr1_j4    | 0.985816   | 0.320395    | 0            | 1         | 1         |
| Tipr1_j5    | 0          | 0.291521    | 0            | 1         | 1         |
| Dcaf6_j2    | 8.81356    | 11.4397     | 0.376252     | 0.0203231 | 0.14243   |
| Rcsd1       | 3.2899     | 2.3416      | -0.490549    | 0.0068694 | 0.064884  |
| Pbx1_j1     | 0.260068   | 0.133356    | 0            | 1         | 1         |
| Nuf2_j1     | 0.153894   | 0.000375683 | -8.67821     | 0.843714  | 0.950584  |
| Nuf2        | 1.41E-05   | 0.145885    | 13.3363      | 0.983508  | 1         |
| Nuf2        | 0.401329   | 0.444999    | 0.149018     | 0.681586  | 0.880374  |
| Rgs4_j1     | 173.116    | 119.782     | 0            | 1         | 1         |
| Hsd17b7_j1  | 0          | 0.137108    | 0            | 1         | 1         |
| Uap1        | 16.5935    | 21.0892     | 0            | 1         | 1         |
| Uhmk1_j3    | 0.584974   | 1.10888     | 0            | 1         | 1         |
| Fcrlb_j2    | 0.0951328  | 0.208096    | 1.12923      | 0.197361  | 0.540247  |
| Sdhc_j1     | 2.52539    | 1.80649     | 0            | 1         | 1         |
| Tomm40l_j2  | 12.983     | 12.8025     | 0            | 1         | 1         |
| Fcer1g_j1   | 1.71744    | 4.58247     | 0            | 1         | 1         |
| Ufc1_j2     | 72.091     | 73.6644     | 0.0311486    | 0.768818  | 0.921186  |
| Ncstn       | 10.0871    | 8.56211     | 0            | 1         | 1         |
| Pea15a_j2   | 0.612671   | 0           | 0            | 1         | 1         |
| Cadm3_j2    | 11.1538    | 17.7474     | 0            | 1         | 1         |
| Cadm3_j1    | 95.0053    | 88.2123     | 0            | 1         | 1         |
| AK145253_j2 | 0.080465   | 0.109486    | 0.444313     | 0.540125  | 1         |
| Mndal       | 0.672968   | 0.994696    | 0.563717     | 0.0582156 | 0.2832    |
| Mndal       | 0.964957   | 1.13652     | 0.236089     | 0.394001  | 0.719796  |



|                  |             |             |               |           |           |
|------------------|-------------|-------------|---------------|-----------|-----------|
| Pld5_j3          | 2.16219     | 1.89847     | 0             | 1         | 1         |
| Cep170_j9        | 0.193885    | 0.000237947 | 0             | 1         | 1         |
| Hmga2-ps1        | 1.20021     | 1.15006     | 0             | 1         | 1         |
| Akt3_j3          | 1.76221     | 2.78838     | 0             | 1         | 1         |
| Hnrnpu_j2        | 7.3627      | 7.84499     | 0.0915365     | 0.453897  | 0.758346  |
| Hnrnpu           | 44.2047     | 45.6833     | 0.0474672     | 0.587926  | 0.835176  |
| Smyd3_j1         | 0.439321    | 0.394641    | -0.154733     | 0.616954  | 0.849253  |
| Smyd3_j9         | 6.53878     | 8.98752     | 0.458903      | 0.0523263 | 0.265577  |
| Smyd3            | 2.57031     | 2.159       | -0.251582     | 0.362999  | 0.697185  |
| Tfb2m_j2         | 4.86492     | 4.35311     | -0.160369     | 0.311157  | 0.655926  |
| Adck3            | 2.12942     | 1.78516     | 0             | 1         | 1         |
| XLOC_001077      | 0.0107163   | 0.0585827   | 2.45067       | 0.725064  | 1         |
| Enah             | 4.06578     | 4.88377     | 0.264462      | 0.0173825 | 0.12774   |
| Degs1_j1         | 23.6541     | 10.3561     | 0             | 1         | 1         |
| Capn2_j1         | 1.03094     | 1.57193     | 0             | 1         | 1         |
| Capn2_j2         | 0.127696    | 0.0875407   | 0             | 1         | 1         |
| Mark1_j1         | 2.52542     | 2.9192      | 0             | 1         | 1         |
| Mark1            | 3.04741     | 3.27241     | 0             | 1         | 1         |
| Iars2_j1         | 13.8796     | 12.0238     | 0             | 1         | 1         |
| Kctd3_j4         | 0.330476    | 0.167088    | -0.983938     | 0.0854371 | 0.356872  |
| Kcnk2            | 0.378459    | 0.514449    | 0.442891      | 0.228203  | 0.575246  |
| Rps6kc1_j7       | 2.75556     | 2.15375     | 0             | 1         | 1         |
| Rps6kc1_j8       | 0.227493    | 0.180812    | 0             | 1         | 1         |
| Mfsd7b_j1        | 1.85649     | 1.53299     | 0             | 1         | 1         |
| Tatdn3_j7        | 2.04349     | 1.89423     | -0.109429     | 0.725721  | 0.902548  |
| Tatdn3_j6        | 1.09757     | 1.41371     | 0.365181      | 0.365654  | 0.699512  |
| Tatdn3           | 1.07507     | 1.18625     | 0.141981      | 0.739026  | 0.908322  |
| Atf3_j1          | 15.8563     | 40.4272     | 0             | 1         | 1         |
| Rcor3            | 2.74729     | 1.90673     | 0             | 1         | 1         |
| Rcor3_j7         | 1.87378     | 1.58861     | 0             | 1         | 1         |
| Hhat_j4          | 0.108214    | 0.139834    | 0.369831      | 0.747139  | 1         |
| Hhat_j9          | 0.769599    | 0.241774    | -1.67045      | 0.0089511 | 0.0788602 |
| Hhat_j11         | 0.146201    | 0.168683    | 0.206359      | 0.799585  | 0.933125  |
| A730013G03Rik    | 0.0715814   | 0.0671032   | -0.0932029    | 0.910456  | 1         |
| Syt14_j1         | 0.628901    | 0.994857    | 0             | 1         | 1         |
| Traf3ip3_j3      | 1.02104     | 1.02783     | 0.00955287    | 0.973729  | 0.992504  |
| XLOC_001132      | 0.226619    | 0.112128    | -1.01512      | 0.458085  | 0.7608    |
| XLOC_001132      | 0.115997    | 0.166512    | 0.521534      | 0.727973  | 0.903627  |
| Cr1l_j2          | 0.000134091 | 0.434038    | 11.6604       | 0.938318  | 0.981144  |
| Tcea1_j1         | 0.208471    | 0.0346336   | -2.5896       | 0.160078  | 0.49462   |
| Tcea1_j9         | 5.31233     | 5.91134     | 0.154142      | 0.27886   | 0.627636  |
| Atp6v1h_j3       | 59.8143     | 59.1184     | 0             | 1         | 1         |
| Atp6v1h_j5       | 2.53434     | 3.46555     | 0             | 1         | 1         |
| Pcmdt1_j3        | 0.227079    | 0.157434    | 0             | 1         | 1         |
| Sgk3_j1          | 0.0547562   | 0.0773335   | 0             | 1         | 1         |
| 6030422M02Rik_j2 | 0.129214    | 0           | -1.79769e+308 | 0.026416  | 1         |
| 6030422M02Rik_j3 | 0.181908    | 0.0582328   | -1.6433       | 0.180719  | 0.520556  |

|                  |           |                 |            |           |           |
|------------------|-----------|-----------------|------------|-----------|-----------|
| Prex2_j2         | 0.0635836 | 0.0266764       | -1.25309   | 0.142262  | 1         |
| A830018L16Rik_j4 | 0.907889  | 0.794655        | -0.192186  | 0.551038  | 0.81573   |
| XLOC_000017      | 0.109796  | 0.0649954       | -0.756419  | 0.346397  | 1         |
| AK080352_j2      | 0.182245  | 0.342022        | 0.908211   | 0.0089677 | 0.0788679 |
| Kcnb2_j3         | 1.0532    | 0.779606        | -0.433961  | 0.14179   | 0.468457  |
| Tmem70           | 1.81628   | 0.93942         | -0.951141  | 0.0928168 | 0.374785  |
| Ly96_j3          | 0.813006  | 0.391308        | -1.05496   | 0.404052  | 0.726573  |
| XLOC_000031      | 0.298264  | 0.299352        | 0          | 1         | 1         |
| Khdrbs2_j2       | 0.870287  | 1.37547         | 0.660357   | 0.0550228 | 0.27362   |
| XLOC_000042      | 0.352932  | 0.391438        | 0.149395   | 0.863487  | 0.956634  |
| Dst_j4           | 0.0661822 | 0               | 0          | 1         | 1         |
| Dst_j5           | 0.629661  | 0.765849        | 0          | 1         | 1         |
| Dst_j13          | 14.2606   | 13.8441         | 0          | 1         | 1         |
| Ptpn18_j1        | 0.0769617 | 0.119106        | 0.630032   | 0.618031  | 1         |
| Ptpn18_j2        | 0.0462757 | 0.161437        | 1.80264    | 0.234067  | 0.581478  |
| Plekhb2_j2       | 7.01048   | 14.2306         | 1.02142    | 1.33E-15  | 2.89E-13  |
| Arid5a_j1        | 1.83214   | 2.82926         | 0          | 1         | 1         |
| Cnm4_j1          | 0.295294  | 0.418524        | 0          | 1         | 1         |
| Cox5b_j1         | 0.785465  | 0.990698        | 0.334898   | 0.489673  | 0.779571  |
| Zap70_j2         | 0.0729292 | 0 -1.79769e+308 | 0.0179763  | 0.0179763 | 1         |
| XLOC_000058      | 0.155229  | 0 -1.79769e+308 | 0.0052821  | 0.0052821 | 0.0528085 |
| 4921511C04Rik_j4 | 0.0883024 | 0 -1.79769e+308 | 0.0066779  | 0.0066779 | 1         |
| 4921511C04Rik_j6 | 0.227182  | 0.215525        | -0.0759925 | 1         | 1         |
| XLOC_000063      | 0.141114  | 0.107876        | 0          | 1         | 1         |
| Nms_j2           | 0.109139  | 0.391744        | 1.84375    | 0.128812  | 0.447263  |
| Map4k4_j5        | 0.214259  | 0 -1.79769e+308 | 3.56E-06   | 0.0001257 | 0.0001257 |
| Map4k4_j9        | 7.808     | 10.8862         | 0.479474   | 0.0107089 | 0.0900178 |
| Slc9a2_j2        | 0.202633  | 0.0763674       | -1.40784   | 0.23628   | 0.583474  |
| XLOC_000078      | 0.0941089 | 0.10779         | 0.195822   | 0.877743  | 1         |
| Tpp2_j1          | 3.45819   | 3.58059         | 0          | 1         | 1         |
| Bivm_j5          | 0.93886   | 0.9389          | 0          | 1         | 1         |
| Gulp1_j1         | 0.850417  | 1.31352         | 0          | 1         | 1         |
| Col3a1_j2        | 5.87371   | 10.0092         | 0          | 1         | 1         |
| XLOC_000093      | 0.168938  | 0.0966297       | -0.805953  | 0.576937  | 0.829228  |
| Stat1            | 0.351308  | 0.208007        | 0          | 1         | 1         |
| Stat1            | 5.99952   | 4.77448         | 0          | 1         | 1         |
| Tmem194b_j1      | 0.568168  | 0.136556        | -2.05682   | 0.0002461 | 0.0045604 |
| Tmem194b_j5      | 0.0941113 | 0.247222        | 1.39337    | 0.0470374 | 0.248626  |
| Mobkl3_j2        | 1.77228   | 0 -1.79769e+308 | 6.17E-22   | 1.81E-19  | 1.81E-19  |
| Plcl1_j1         | 0.203102  | 0.248719        | 0.292311   | 0.510317  | 0.791044  |
| Sgol2_j2         | 0.547722  | 0.329883        | -0.731488  | 0.0272424 | 0.174397  |
| Aox1_j2          | 0.0876997 | 0 -1.79769e+308 | 0.0019772  | 0.0019772 | 1         |
| Aox1_j7          | 2.72626   | 1.67316         | -0.704342  | 0.0139206 | 0.109022  |
| Bzw1_j4          | 41.6949   | 43.0239         | 0.0452689  | 0.605456  | 0.844452  |
| AK053027_j1      | 0.0537577 | 0.0563431       | 0.067769   | 0.946373  | 1         |
| Cflar_j2         | 0.0873569 | 0.0554428       | -0.655924  | 0.655837  | 1         |
| Cflar_j4         | 0.102871  | 0.101187        | -0.0238085 | 0.984269  | 1         |

|             |            |                 |            |           |           |
|-------------|------------|-----------------|------------|-----------|-----------|
| Cflar_j6    | 0.235947   | 0.226113        | -0.0614197 | 0.916809  | 0.97399   |
| Cflar_j8    | 0.547372   | 1.49071         | 1.44541    | 1.62E-09  | 1.32E-07  |
| Stradb_j1   | 1.20824    | 0.999046        | -0.274286  | 0.468758  | 0.767193  |
| Cdk15_j5    | 1.39276    | 1.63255         | 0.229188   | 0.27889   | 0.627636  |
| Cdk15_j7    | 11.7966    | 12.1476         | 0.0422995  | 0.679472  | 0.879493  |
| Abi2_j2     | 0.385864   | 0.024926        | 0          | 1         | 1         |
| Abi2_j1     | 0.493731   | 0.433466        | 0          | 1         | 1         |
| Abi2_j3     | 0.274511   | 0.157108        | 0          | 1         | 1         |
| Nrp2        | 1.57665    | 1.23983         | 0          | 1         | 1         |
| Nrp2_j2     | 0.693187   | 1.06518         | 0          | 1         | 1         |
| Adam23_j2   | 6.53162    | 3.64853         | 0          | 1         | 1         |
| XLOC_000145 | 0.423039   | 0.595886        | 0.494245   | 0.410911  | 0.730555  |
| XLOC_000145 | 0.707433   | 0.770651        | 0.123485   | 0.862089  | 0.956374  |
| Ccnyl1_j1   | 0.857191   | 0.877074        | 0.0330823  | 0.902829  | 0.969009  |
| Pikfyve_j12 | 2.12668    | 1.46235         | -0.540315  | 0.006452  | 0.0619057 |
| Mtap2_j12   | 3.60242    | 3.34332         | -0.107682  | 0.386228  | 0.714495  |
| Mtap2_j14   | 21.0064    | 19.6718         | -0.0946985 | 0.326547  | 0.669766  |
| Unc80_j3    | 0.174892   | 0.114891        | 0          | 1         | 1         |
| Xrcc5_j2    | 1.20565    | 1.13097         | -0.0922571 | 0.794256  | 0.931391  |
| Smarcal1_j4 | 0.795461   | 0.655717        | -0.278719  | 0.280936  | 0.629415  |
| Pnkd        | 30.631     | 21.81           | 0          | 1         | 1         |
| Slc11a1_j1  | 0.131237   | 0 -1.79769e+308 | 0.0012137  | 0.0012137 | 1         |
| Slc11a1_j3  | 0.221141   | 0.0760697       | -1.53957   | 0.127977  | 0.445765  |
| Plcd4_j2    | 2.69843    | 1.70985         | 0          | 1         | 1         |
| Stk36_j10   | 0.0613845  | 0.0361664       | -0.763226  | 0.528524  | 1         |
| Stk36_j11   | 0.385817   | 0.328048        | -0.234011  | 0.657994  | 0.869846  |
| Cyp27a1_j1  | 0.470043   | 0.739835        | 0.654411   | 0.0590686 | 0.28563   |
| Stk16       | 2.99096    | 3.25923         | 0          | 1         | 1         |
| Speg_j2     | 0.58442    | 0.469952        | -0.314493  | 0.377425  | 0.70922   |
| Speg_j1     | 0.393707   | 0.74164         | 0.913596   | 0.0064477 | 0.0618847 |
| Speg_j14    | 0.0650033  | 0 -1.79769e+308 | 8.49E-05   | 8.49E-05  | 1         |
| Speg_j15    | 2.21977    | 2.56412         | 0.208058   | 0.166338  | 0.502919  |
| Gmppa_j2    | 0.0700409  | 0               | 0          | 1         | 1         |
| Slc4a3_j1   | 0.178516   | 0.0653964       | 0          | 1         | 1         |
| Slc4a3_j11  | 0.00564058 | 0.545072        | 0          | 1         | 1         |
| Slc4a3_j15  | 2.91551    | 2.97445         | 0          | 1         | 1         |
| Sgpp2_j1    | 2.32857    | 3.03138         | 0.380533   | 0.0149887 | 0.114913  |
| Mrpl44_j2   | 4.3417     | 3.44392         | -0.33421   | 0.183971  | 0.524679  |
| Mff_j2      | 5.5054     | 5.70453         | 0          | 1         | 1         |
| Agfg1       | 0.147646   | 0.114197        | -0.370619  | 0.457384  | 0.760373  |
| Agfg1_j5    | 1.70978    | 2.71038         | 0.66468    | 2.84E-05  | 0.0007361 |
| Agfg1_j8    | 1.64124    | 1.76691         | 0.106442   | 0.542044  | 0.8099    |
| Sp100_j6    | 0.139929   | 0 -1.79769e+308 | 0.0017435  | 0.0017435 | 0.0223926 |
| Cab39_j2    | 0.463547   | 0               | 0          | 1         | 1         |
| Psm1_j1     | 0.264495   | 0               | 0          | 1         | 1         |
| Psm1_j3     | 37.6538    | 34.8663         | 0          | 1         | 1         |
| Armc9       | 3.01574    | 2.22421         | -0.439221  | 0.0398815 | 0.223402  |

|                  |           |                 |            |           |           |
|------------------|-----------|-----------------|------------|-----------|-----------|
| Armc9            | 0.816788  | 0.74958         | -0.12388   | 0.588325  | 0.835461  |
| Ptma_j3          | 40.7716   | 50.0178         | 0.294879   | 0.0032594 | 0.0368336 |
| Dis3l2_j1        | 3.27926   | 3.43204         | 0          | 1         | 1         |
| Eif4e2_j1        | 0.0843017 | 0.108434        | 0.363181   | 0.790643  | 1         |
| Eif4e2           | 0.327168  | 0 -1.79769e+308 |            | 0.0011881 | 0.0164222 |
| Eif4e2_j2        | 0.0887463 | 0 -1.79769e+308 |            | 0.0537098 | 1         |
| Gigyf2           | 5.42415   | 3.71048         | 0          | 1         | 1         |
| Inpp5d           | 0.436785  | 0.736378        | 0.753523   | 0.0018676 | 0.0236566 |
| Inpp5d_j4        | 0.41222   | 0.846404        | 1.03793    | 0.003224  | 0.0365103 |
| XLOC_000228      | 0.319037  | 0.300303        | -0.0873048 | 0.756144  | 0.915908  |
| Spp2_j1          | 0.203332  | 0.127022        | -0.678762  | 0.306139  | 0.651491  |
| Lrrfip1_j3       | 0.221646  | 0.222737        | 0          | 1         | 1         |
| Twist2           | 0.133033  | 0.130974        | -0.0225049 | 0.97621   | 1         |
| Gpc1_j2          | 2.46144   | 0.436101        | 0          | 1         | 1         |
| Rnpepl1_j3       | 0.565354  | 0.305006        | 0          | 1         | 1         |
| Capn10_j1        | 0.248069  | 0.0715718       | -1.79328   | 0.0792466 | 0.341796  |
| Gpr35_j1         | 0.24546   | 0.102572        | 0          | 1         | 1         |
| Ppp1r7_j3        | 1.19997   | 5.70045         | 0          | 1         | 1         |
| Atg4b_j2         | 6.22389   | 9.33637         | 0          | 1         | 1         |
| Ing5_j1          | 0.754052  | 0.545963        | -0.46586   | 0.120542  | 0.432452  |
| D2hgdh_j2        | 0.229658  | 0.421799        | 0.877069   | 0.190574  | 0.532757  |
| D2hgdh_j5        | 0.356028  | 0.36077         | 0.0190882  | 0.979245  | 0.993972  |
| D2hgdh_j1        | 1.09445   | 0.753246        | -0.539012  | 0.19502   | 0.537314  |
| Cntnap5b_j3      | 0.138954  | 0.0430149       | -1.6917    | 0.214919  | 0.560432  |
| Zcchc2_j2        | 0.209876  | 0 -1.79769e+308 |            | 4.55E-08  | 2.71E-06  |
| Zcchc2_j3        | 0.431281  | 0.140592        | -1.61711   | 0.0013178 | 0.0178427 |
| Serpinb5_j2      | 0.116026  | 0 -1.79769e+308 |            | 0.0018997 | 1         |
| Serpinb5         | 0.0495721 | 0.201373        | 2.02227    | 0.0208523 | 0.145138  |
| Ccdc93_j2        | 1.98819   | 1.96105         | 0          | 1         | 1         |
| Gpr39            | 0.123464  | 0.0707925       | -0.802425  | 0.512132  | 1         |
| Mgat5_j1         | 0.0564173 | 0.0111468       | 0          | 1         | 1         |
| Ubxn4_j1         | 0.238791  | 0.204335        | 0          | 1         | 1         |
| Thsd7b           | 0.324637  | 0.470335        | 0.534859   | 0.0847737 | 0.355482  |
| 5430435G22Rik_j2 | 0.21059   | 0.0314457       | -2.7435    | 0.0338626 | 0.201403  |
| Lemd1_j3         | 0.0717567 | 0.0294679       | -1.28397   | 0.266288  | 1         |
| Nuak2_j1         | 0.079153  | 0 -1.79769e+308 |            | 0.0123853 | 1         |
| Rbbp5_j5         | 0.396685  | 0               | 0          | 1         | 1         |
| Pik3c2b_j3       | 0.0476106 | 0.0106941       | -2.15446   | 0.262732  | 1         |
| XLOC_000328      | 0.139445  | 0.122698        | -0.184583  | 0.816194  | 0.940221  |
| Adipor1_j1       | 23.8135   | 26.5443         | 0.156623   | 0.198468  | 0.541655  |
| Arl8a_j4         | 45.3321   | 66.6114         | 0.555235   | 6.74E-05  | 0.001538  |
| Phlda3_j1        | 9.43989   | 15.5793         | 0.722792   | 6.41E-05  | 0.0014754 |
| Kif21b_j4        | 0.401116  | 0.240346        | 0          | 1         | 1         |
| Ddx59_j1         | 2.26897   | 2.30255         | 0.021199   | 0.920695  | 0.975195  |
| XLOC_000360      | 0.660708  | 0.31331         | -1.07642   | 0.136704  | 0.459729  |
| Zbtb41_j2        | 0.871479  | 0.1044          | 0          | 1         | 1         |
| Zbtb41_j4        | 0.383391  | 0.00782447      | 0          | 1         | 1         |

|             |           |            |               |           |           |
|-------------|-----------|------------|---------------|-----------|-----------|
| Aspm_j1     | 0.133396  | 0.0147263  | -3.17925      | 0.196239  | 1         |
| Kcnt2_j5    | 0.0772289 | 0          | -1.79769e+308 | 0.0093138 | 1         |
| Kcnt2_j4    | 0.0532444 | 0          | -1.79769e+308 | 0.0179311 | 1         |
| Kcnt2_j11   | 0.324287  | 0.232825   | -0.478024     | 1         | 1         |
| Uchl5       | 13.014    | 13.4257    | 0             | 1         | 1         |
| Fam5c_j1    | 0.12275   | 0.323188   | 1.39665       | 0.0171133 | 0.126351  |
| Ivns1abp_j4 | 0.195254  | 0.18673    | -0.0643998    | 0.89864   | 0.967622  |
| Ivns1abp_j5 | 25.551    | 29.6244    | 0.213406      | 0.0403096 | 0.224974  |
| Niban_j2    | 1.13898   | 0.0946378  | 0             | 1         | 1         |
| Glt25d2_j3  | 0.722933  | 1.24865    | 0             | 1         | 1         |
| XLOC_000377 | 0.073373  | 0.0445562  | 0             | 1         | 1         |
| Rgs8_j4     | 0.128914  | 0          | 0             | 1         | 1         |
| Rnasel_j6   | 0.680818  | 0.0139454  | 0             | 1         | 1         |
| Rnasel_j5   | 1.2091    | 1.03406    | 0             | 1         | 1         |
| Rnasel_j9   | 0.239709  | 0.424856   | 0             | 1         | 1         |
| Ifrg15      | 0.375139  | 0.00198138 | 0             | 1         | 1         |
| Tor1aip2_j3 | 0.564751  | 1.38304    | 0             | 1         | 1         |
| Abl2        | 0.475903  | 0.476406   | 0.00152362    | 0.994733  | 0.998469  |
| Abl2_j2     | 0.204562  | 0          | -1.79769e+308 | 1.96E-14  | 3.60E-12  |
| XLOC_000396 | 0.279017  | 0.170292   | -0.712341     | 0.412302  | 0.731383  |
| BC026585_j4 | 0.210786  | 0.277256   | 0.39544       | 0.57863   | 0.830487  |
| Sec16b_j2   | 0.130768  | 0          | -1.79769e+308 | 0.0325329 | 1         |
| Sec16b_j5   | 0.20438   | 0.202911   | -0.0104021    | 0.986499  | 0.996133  |
| Sec16b_j8   | 0.0872082 | 0          | -1.79769e+308 | 0.0081389 | 1         |
| Rfwd2_j3    | 0.149065  | 0.427516   | 1.52004       | 0.105516  | 0.403518  |
| XLOC_000402 | 0.227813  | 0.078803   | -1.53153      | 0.182659  | 0.523127  |
| Ankrd45_j7  | 0.473192  | 0          | 0             | 1         | 1         |
| Ankrd45_j9  | 0.202277  | 0.0630327  | 0             | 1         | 1         |
| Scyl3_j1    | 0.548472  | 0.244546   | 0             | 1         | 1         |
| Dpt         | 0.164864  | 0.0797497  | -1.04773      | 0.17716   | 0.516317  |
| AK042927_j3 | 0.065868  | 0          | -1.79769e+308 | 0.0093389 | 1         |
| AK042927_j7 | 0.108467  | 0.0268972  | -2.01172      | 0.151544  | 1         |
| Creg1_j2    | 0.471693  | 0.0919838  | -2.35839      | 0.0248738 | 0.163646  |
| Ildr2       | 0.0860355 | 0.113426   | 0.398746      | 0.465234  | 1         |
| Rxrg_j4     | 0.207096  | 0.0605419  | 0             | 1         | 1         |
| Fcgr4       | 0.34847   | 0.625347   | 0.843623      | 0.0322157 | 0.194672  |
| Nr1i3_j3    | 0.207605  | 0.172176   | 0             | 1         | 1         |
| Pfdn2       | 24.2917   | 23.39      | 0             | 1         | 1         |
| Pvrl4_j2    | 0.851073  | 0.888091   | 0             | 1         | 1         |
| Pvrl4_j1    | 1.15593   | 0.280391   | 0             | 1         | 1         |
| Arhgap30_j3 | 0.202382  | 0.178861   | -0.178243     | 0.760153  | 0.917414  |
| Usf1_j5     | 1.96728   | 2.19817    | 0             | 1         | 1         |
| Cd84_j2     | 0.0799706 | 0          | -1.79769e+308 | 0.0995653 | 1         |
| Igsf8_j1    | 0.0729821 | 0          | -1.79769e+308 | 0.0325665 | 1         |
| Igsf8_j2    | 0.143315  | 0          | -1.79769e+308 | 0.0048161 | 0.0492826 |
| Igsf9_j1    | 0.0695018 | 0.131981   | 0.925203      | 0.239439  | 1         |
| Pydc3_j2    | 0.0757497 | 0.0235512  | -1.68544      | 0.479308  | 1         |

|                   |           |                 |            |           |           |
|-------------------|-----------|-----------------|------------|-----------|-----------|
| Sdccag8_j1        | 5.09094   | 5.77987         | 0          | 1         | 1         |
| rp58_j5           | 0.299021  | 0.338053        | 0          | 1         | 1         |
| EG545391_j3       | 0.189141  | 0.0817045       | -1.21097   | 0.213425  | 0.558539  |
| Pppde1_j2         | 0.0977528 | 0.0404594       | 0          | 1         | 1         |
| Efcab2_j2         | 2.07867   | 1.71285         | -0.279259  | 0.126581  | 0.443067  |
| Efcab2_j4         | 0.279861  | 0.194489        | -0.525023  | 0.317334  | 0.660716  |
| Itpkb_j4          | 8.32981   | 6.51528         | 0          | 1         | 1         |
| Itpkb_j6          | 11.7663   | 3.73476         | 0          | 1         | 1         |
| Parp1_j2          | 12.9289   | 16.2514         | 0          | 1         | 1         |
| XLOC_000496       | 0.0843081 | 0.0497477       | -0.761042  | 0.688655  | 1         |
| XLOC_000496       | 0.145989  | 0.0889508       | -0.714784  | 0.385158  | 0.713848  |
| Pycr2_j1          | 1.34955   | 1.33918         | -0.0111256 | 0.9761    | 0.99312   |
| Tmem63a           | 0.860968  | 0.744535        | 0          | 1         | 1         |
| 1700047M11Rik_j1  | 0.120195  | 0 -1.79769e+308 | 0.0162144  |           | 1         |
| Trp53bp2_j1       | 0.279113  | 0.0998332       | -1.48326   | 0.0210996 | 0.14617   |
| Trp53bp2_j2       | 0.571418  | 0.179723        | -1.66877   | 0.0009318 | 0.0135135 |
| Susd4_j4          | 1.17439   | 0.750773        | 0          | 1         | 1         |
| Tlr5_j6           | 0.0628092 | 0.00465927      | -3.7528    | 0.244023  | 1         |
| Tlr5_j7           | 0.172073  | 0.0755127       | -1.18823   | 0.158259  | 0.492485  |
| XLOC_000516       | 0.144752  | 0.109955        | -0.396677  | 0.720025  | 0.899505  |
| XLOC_000516       | 0.129025  | 0.123399        | -0.0643259 | 0.942433  | 1         |
| Eprs_j7           | 8.05455   | 8.36284         | 0          | 1         | 1         |
| Eprs_j8           | 18.1344   | 22.9952         | 0          | 1         | 1         |
| AK020767_j1       | 0.159291  | 0.108704        | -0.551258  | 0.553953  | 0.817269  |
| Gpatch2_j1        | 0.33367   | 0 -1.79769e+308 | 1.08E-10   | 1.09E-08  |           |
| Esrrg_j4          | 3.26489   | 1.2256          | 0          | 1         | 1         |
| Ptpn14_j2         | 0.0727509 | 0 -1.79769e+308 | 0.0054273  |           | 1         |
| Angel2_j4         | 0.698464  | 0.400012        | -0.804144  | 0.154046  | 0.486993  |
| Nsl1_j1           | 0.0701457 | 0.239971        | 1.77443    | 0.0250797 | 0.164682  |
| Batf3_j1          | 0.177224  | 0.292776        | 0.724221   | 0.305391  | 0.650525  |
| XLOC_000533       | 0.131499  | 0 -1.79769e+308 | 0.0001685  |           | 1         |
| Ints7_j2          | 0.998059  | 1.37183         | 0.458907   | 0.0574092 | 0.28075   |
| AK145301_j1       | 0.151684  | 0.0796711       | 0          | 1         | 1         |
| AK145301          | 0.281067  | 0.156307        | 0          | 1         | 1         |
| A130010J15Rik_j1  | 0.966885  | 0.951716        | 0          | 1         | 1         |
| Lamb3_j2          | 0.130594  | 0.0203774       | -2.68005   | 0.252871  | 1         |
| Plxna2_j1         | 12.3304   | 10.9549         | 0          | 1         | 1         |
| Cd34_j1           | 0.034385  | 0.0581254       | 0.75739    | 0.535345  | 1         |
| A330023F24Rik_j4  | 0.0868651 | 0.0447154       | -0.958006  | 0.284564  | 1         |
| A330023F24Rik_j10 | 1.53479   | 1.23889         | -0.308989  | 0.149912  | 0.47968   |
| Sox17_j1          | 0.0688026 | 0.0543576       | -0.339981  | 0.808575  | 1         |
| Sox17_j2          | 0.0539305 | 0 -1.79769e+308 | 0.0034447  |           | 1         |
| Sntg1_j2          | 0.149779  | 0 -1.79769e+308 | 9.01E-08   | 4.89E-06  |           |
| Mybl1_j3          | 0.0544244 | 0.0592236       | 0.121919   | 0.899823  | 1         |
| Mybl1_j5          | 0.168238  | 0.0198438       | -3.08374   | 0.0119112 | 0.0976318 |
| Snhg6_j2          | 7.52504   | 7.26077         | -0.0515782 | 0.874933  | 0.96023   |
| Arfgef1           | 6.63587   | 5.94625         | 0          | 1         | 1         |

|                  |            |                 |            |           |           |
|------------------|------------|-----------------|------------|-----------|-----------|
| Slco5a1_j1       | 5.28882    | 3.26529         | -0.695734  | 5.44E-08  | 3.17E-06  |
| Ncoa2_j1         | 0.272919   | 0.182682        | 0          | 1         | 1         |
| Ncoa2            | 2.60003    | 2.31802         | 0          | 1         | 1         |
| Trpa1_j5         | 0.172469   | 0.0485787       | -1.82794   | 0.0441185 | 0.239316  |
| XLOC_000584      | 0.117249   | 0.0667419       | -0.812905  | 0.301964  | 1         |
| AK015384_j3      | 0.184726   | 0.0933556       | -0.984578  | 0.482934  | 0.77583   |
| Rpl7_j2          | 0.186137   | 0.248482        | 0.416781   | 0.446173  | 0.75332   |
| Stau2_j4         | 0.799636   | 0               | 0          | 1         | 1         |
| Stau2_j3         | 5.85769    | 4.75328         | 0          | 1         | 1         |
| Ube2w_j1         | 6.69211    | 6.34846         | -0.0760546 | 0.561653  | 0.821809  |
| Tceb1_j2         | 0.694135   | 0.74011         | 0.0925231  | 0.732791  | 0.905724  |
| XLOC_000593      | 0.0716511  | 0.053712        | -0.415746  | 0.782015  | 1         |
| 6720483E21Rik_j2 | 0.0981387  | 0               | 0          | 1         | 1         |
| Tram2            | 0.204039   | 0.212068        | 0.055682   | 0.883643  | 0.963053  |
| Tram2_j1         | 0.0694679  | 0 -1.79769e+308 |            | 0.0002816 | 1         |
| Kcnq5_j1         | 0.306421   | 0.146911        | 0          | 1         | 1         |
| Rims1_j5         | 2.15344    | 1.58648         | 0          | 1         | 1         |
| Rims1_j17        | 0.115085   | 0 -1.79769e+308 |            | 0.0018704 | 1         |
| Rims1_j15        | 0.593182   | 0.2761          | -1.10328   | 0.0252864 | 0.165616  |
| Fam135a_j3       | 3.45209    | 3.27071         | -0.0778677 | 0.605118  | 0.844217  |
| Fam135a_j4       | 0.372936   | 0.0115387       | -5.01438   | 0.0004058 | 0.0068489 |
| Col19a1_j1       | 0.141693   | 0 -1.79769e+308 |            | 3.54E-08  | 2.17E-06  |
| Bai3_j7          | 0.826991   | 0.310066        | 0          | 1         | 1         |
| Bai3_j8          | 0.00132173 | 0.167751        | 0          | 1         | 1         |
| Phf3_j2          | 0.155765   | 0.177738        | 0          | 1         | 1         |
| Phf3_j1          | 0.0685359  | 0.0630821       | 0          | 1         | 1         |
| Prim2_j3         | 0.0727698  | 0 -1.79769e+308 |            | 0.0269037 | 1         |
| Bend6_j1         | 3.00168    | 0               | 0          | 1         | 1         |
| Uggt1_j4         | 3.04441    | 3.59813         | 0          | 1         | 1         |
| Neur13           | 0.307583   | 0.232011        | -0.406785  | 0.434243  | 0.74542   |
| 4632411B12Rik_j4 | 1.02894    | 1.54015         | 0          | 1         | 1         |
| Lman2l_j4        | 4.05985    | 4.44627         | 0.131168   | 0.390937  | 0.717624  |
| Ankrd23_j2       | 0.0749241  | 0 -1.79769e+308 |            | 0.0073774 | 1         |
| Ankrd39_j2       | 0.465179   | 0.647567        | 0.477243   | 0.183483  | 0.524089  |
| Sema4c_j11       | 2.08985    | 2.40141         | 0          | 1         | 1         |
| Sema4c_j12       | 0.0522768  | 0.0175288       | 0          | 1         | 1         |
| Actr1b_j2        | 0.213898   | 0               | 0          | 1         | 1         |
| Tmem131_j1       | 5.08369    | 5.5314          | 0          | 1         | 1         |
| 6330578E17Rik_j2 | 1.09779    | 0.197873        | 0          | 1         | 1         |
| 2010300C02Rik_j5 | 0.227176   | 0 -1.79769e+308 |            | 7.33E-09  | 5.23E-07  |
| Tsga10           | 0.283129   | 0.201468        | 0          | 1         | 1         |
| Tsga10_j4        | 0.230142   | 0.165553        | 0          | 1         | 1         |
| Aff3_j1          | 0.697605   | 0.268972        | 0          | 1         | 1         |
| Aff3_j2          | 0.443272   | 1.5532          | 0          | 1         | 1         |
| Aff3_j3          | 0.836533   | 0.115276        | 0          | 1         | 1         |
| XLOC_000646      | 0.110324   | 0.0888164       | -0.312848  | 0.754859  | 1         |
| Rnf149_j1        | 1.08816    | 0.841519        | -0.370825  | 0.18107   | 0.520983  |

|                  |           |                 |            |           |           |
|------------------|-----------|-----------------|------------|-----------|-----------|
| AK041998_j1      | 0.155633  | 0.0279837       | -2.47549   | 0.142361  | 0.469041  |
| Mfsd9_j3         | 0.256968  | 0.215329        | -0.255048  | 0.660175  | 0.871049  |
| Tgfbra1_j5       | 1.5126    | 1.36391         | 0          | 1         | 1         |
| Uxs1_j4          | 3.78052   | 3.6517          | 0          | 1         | 1         |
| Uxs1_j5          | 0.89069   | 0.591564        | 0          | 1         | 1         |
| 1700029F09Rik_j2 | 0.389954  | 0.290505        | -0.42474   | 0.602143  | 0.842672  |
| Slc39a10_j3      | 2.39084   | 3.06514         | 0          | 1         | 1         |
| Mfsd6_j1         | 6.65528   | 0.00872422      | 0          | 1         | 1         |
| Inpp1_j1         | 4.54749   | 4.63868         | 0          | 1         | 1         |
| XLOC_000678      | 0.0329903 | 0.120111        | 1.86426    | 0.240086  | 1         |
| XLOC_000678      | 0.179465  | 0.0957302       | -0.906654  | 0.51901   | 0.796737  |
| Hecw2_j1         | 0.0783029 | 0.0106163       | 0          | 1         | 1         |
| Gtf3c3_j1        | 0.394826  | 0.123941        | -1.67156   | 0.0044766 | 0.046737  |
| Ankrd44_j4       | 0.376257  | 0.164503        | -1.1936    | 0.0030567 | 0.0349727 |
| Hspd1_j7         | 0.427888  | 0.131688        | -1.70011   | 0.0573463 | 0.280663  |
| 1110034B05Rik    | 3.14913   | 3.24642         | 0.0438966  | 0.811236  | 0.938053  |
| Kctd18_j4        | 0.0619611 | 0 -1.79769e+308 |            | 0.0305509 | 1         |
| Clk1_j2          | 7.49052   | 8.3308          | 0          | 1         | 1         |
| Fam126b_j2       | 0.940516  | 0.000140694     | -12.7067   | 0.509883  | 0.790859  |
| Trak2_j6         | 6.93978   | 9.69924         | 0          | 1         | 1         |
| Mpp4_j3          | 0.0981859 | 0.139806        | 0.509836   | 0.602641  | 1         |
| Als2_j1          | 1.60827   | 1.76787         | 0.136502   | 0.492085  | 0.78083   |
| Wdr12            | 0.255164  | 0.256017        | 0.00481167 | 0.986801  | 0.99622   |
| Raph1_j6         | 3.16675   | 2.39488         | 0          | 1         | 1         |
| XLOC_000710      | 0.0736719 | 0.0574435       | -0.358971  | 0.835702  | 1         |
| XLOC_000710      | 0.425043  | 1.30575         | 1.6192     | 0.0036826 | 0.0405203 |
| Ino80d           | 0.108761  | 0.0685758       | -0.665395  | 0.171951  | 1         |
| Klf7_j6          | 1.63116   | 1.66554         | 0          | 1         | 1         |
| XLOC_000721      | 0.108325  | 0.00010374      | -10.0282   | 0.947428  | 1         |
| D630023F18Rik_j2 | 0.0892404 | 0.0179672       | -2.31233   | 0.372287  | 1         |
| 1110028C15Rik    | 1.27814   | 1.29244         | 0.0160543  | 0.933691  | 0.97986   |
| Tns1_j1          | 0.0881105 | 0               | 0          | 1         | 1         |
| Tmbim1_j5        | 0.0591095 | 0.00758554      | -2.96207   | 0.0693095 | 1         |
| Tmbim1_j6        | 0.0645164 | 0 -1.79769e+308 |            | 0.0004654 | 1         |
| Zfp142_j1        | 0.535966  | 0.453709        | 0          | 1         | 1         |
| Rnf25            | 11.5014   | 14.0958         | 0          | 1         | 1         |
| XLOC_000751      | 0.231386  | 0.0776018       | -1.57614   | 0.0819235 | 0.348742  |
| Ptprn_j5         | 22.6376   | 31.2112         | 0          | 1         | 1         |
| Dnpep_j2         | 5.84304   | 8.48222         | 0          | 1         | 1         |
| Epha4_j2         | 0.0720523 | 0.0302149       | -1.25378   | 0.270577  | 1         |
| Scg2_j3          | 73.8121   | 70.9677         | 0          | 1         | 1         |
| Wdfy1_j2         | 0.423712  | 0.427204        | 0          | 1         | 1         |
| Cul3_j1          | 13.2895   | 11.8999         | 0          | 1         | 1         |
| Col4a4_j4        | 0.249129  | 0.162809        | -0.613713  | 0.549167  | 0.814518  |
| Slc19a3_j1       | 0.360232  | 0 -1.79769e+308 |            | 3.60E-11  | 4.02E-09  |
| Sphkap           | 3.41476   | 2.99809         | 0          | 1         | 1         |
| Pid1_j1          | 1.20881   | 1.74685         | 0.531162   | 0.05517   | 0.274103  |



|              |            |                       |            |           |           |
|--------------|------------|-----------------------|------------|-----------|-----------|
| Dner_j1      | 15.2834    | 15.0598               | -0.0212687 | 0.870541  | 0.958726  |
| Trip12_j10   | 1.26437    | 2.50345               | 0          | 1         | 1         |
| Trip12_j11   | 0.491715   | 0.289309              | 0          | 1         | 1         |
| Trip12       | 0.92875    | 0.633735              | 0          | 1         | 1         |
| Slc16a14_j2  | 0.25521    | 0.0662663             | 0          | 1         | 1         |
| Slc16a14     | 0.182298   | 0.317712              | 0          | 1         | 1         |
| Ncl_j2       | 0.0945634  | 0 -1.79769e+308       |            | 0.0059939 | 1         |
| Ecel1_j11    | 0.496953   | 1.00717               | 1.01913    | 0.0001581 | 0.0031503 |
| Ecel1_j14    | 0.070257   | 0.160563              | 1.19243    | 0.227808  | 0.574936  |
| Usp40_j2     | 2.00094    | 2.17561               | 0.120744   | 0.433138  | 0.744598  |
| Hjurp_j6     | 0.29789    | 0.246664              | -0.272233  | 0.77179   | 0.922479  |
| Hjurp_j7     | 0.690095   | 0.518626              | -0.412101  | 0.41812   | 0.735013  |
| Hjurp_j3     | 5.2266     | 4.37622               | -0.256188  | 0.07812   | 0.338615  |
| Col6a3_j1    | 1.91378    | 2.50409               | 0.387855   | 0.015433  | 0.117303  |
| Col6a3_j2    | 0.115539   | 0.0276497             | -2.06304   | 0.0107342 | 1         |
| Col6a3_j3    | 0.164683   | 0.16129               | -0.0300328 | 0.937214  | 0.980745  |
| Ilkap_j1     | 2.486      | 2.35793               | -0.0763068 | 0.807277  | 0.936458  |
| Ilkap_j2     | 0.0958886  | 0 -1.79769e+308       |            | 0.0440979 | 1         |
| Ilkap_j3     | 0.0572115  | 0 -1.79769e+308       |            | 0.0883794 | 1         |
| Per2_j2      | 1.16244    | 0.68557               | -0.761784  | 0.0297696 | 0.184748  |
| Per2_j4      | 0.198288   | 0.0137842             | -3.8465    | 0.0138019 | 0.108424  |
| Per2_j5      | 0.145822   | 0.216775              | 0.571985   | 0.277702  | 0.626567  |
| Per2         | 0.585282   | 0.538409              | -0.120431  | 0.640605  | 0.861179  |
| Hdac4_j8     | 0.203449   | 0                     | 0          | 1         | 1         |
| AK017177_j1  | 0.105017   | 0 -1.79769e+308       |            | 0.0048449 | 1         |
| Kif1a_j4     | 41.7634    | 39.8195               | 0          | 1         | 1         |
| Kif1a        | 0.00851865 | 17.4514               | 0          | 1         | 1         |
| Hdlbp_j1     | 3.41576    | 4.78576               | 0          | 1         | 1         |
| Ppip5k2_j7   | 0.207466   | 0.21507               | 0          | 1         | 1         |
| Pam_j2       | 15.4182    | 20.1052               | 0          | 1         | 1         |
| Pam_j1       | 19.634     | 17.2181               | 0          | 1         | 1         |
| Pign_j10     | 0          | 0.181076 1.79769e+308 |            | 4.57E-05  | 0.0011052 |
| Pign_j9      | 0.127591   | 0.0224689             | -2.50553   | 0.0262622 | 1         |
| Cdh19_j6     | 0.528509   | 0.414775              | -0.349597  | 0.374349  | 0.707086  |
| Dsel_j5      | 0.875502   | 0.704064              | -0.314404  | 0.359757  | 0.694997  |
| XLOC_000841  | 0.196228   | 0.102003              | -0.943914  | 0.269673  | 0.618744  |
| Tsn_j1       | 5.32176    | 6.04507               | 0          | 1         | 1         |
| Tsn_j3       | 5.07629    | 4.64412               | 0          | 1         | 1         |
| Ralb_j3      | 1.68378    | 0                     | 0          | 1         | 1         |
| Ralb_j4      | 1.8463     | 1.23176               | 0          | 1         | 1         |
| Epb4.115_j2  | 0.16727    | 0.121423              | -0.462143  | 0.347412  | 0.686052  |
| Epb4.115_j10 | 0.370584   | 0.206093              | -0.846506  | 0.128492  | 0.446769  |
| Epb4.115     | 0.0482394  | 0 -1.79769e+308       |            | 0.0437447 | 1         |
| Epb4.115     | 0.0156884  | 0.106074              | 2.7573     | 0.090714  | 1         |
| Ptpn4_j4     | 0.0812573  | 0                     | 0          | 1         | 1         |
| Ptpn4_j6     | 0.207525   | 1.97E-05              | 0          | 1         | 1         |
| Tmem177_j1   | 1.26202    | 1.54925               | 0.295842   | 0.375373  | 0.707705  |

|                       |             |                 |            |           |           |
|-----------------------|-------------|-----------------|------------|-----------|-----------|
| Dbi_j1                | 170.206     | 224.286         | 0.39806    | 4.90E-05  | 0.0011743 |
| Ddx18_j12             | 0.660597    | 0.653494        | -0.0155973 | 0.980108  | 0.994006  |
| Dpp10_j1              | 23.1703     | 15.169          | 0          | 1         | 1         |
| Actr3_j2              | 28.6984     | 23.6406         | -0.279707  | 1         | 1         |
| Actr3_j1              | 1.15745     | 0.817489        | -0.501679  | 1         | 1         |
| Zranb3_j2             | 0.0502922   | 0 -1.79769e+308 |            | 0.0097208 | 1         |
| Zranb3_j3             | 0.124123    | 0.181421        | 0.547564   | 0.35257   | 0.689448  |
| Mcm6_j1               | 1.30286     | 1.60954         | 0          | 1         | 1         |
| Cd55_j2               | 0.173624    | 0 -1.79769e+308 |            | 0.0002596 | 0.0047621 |
| Pfkfb2_j5             | 1.94858     | 1.25793         | 0          | 1         | 1         |
| Srgap2_j4             | 3.42566     | 3.89354         | 0          | 1         | 1         |
| Nfasc_j1              | 0.819543    | 0.707362        | 0          | 1         | 1         |
| Lax1_j1               | 0.0884945   | 0.0877713       | -0.0118383 | 0.989242  | 1         |
| Atp2b4_j7             | 0           | 0.199089        | 0          | 1         | 1         |
| Adora1_j5             | 2.45848     | 4.18373         | 0          | 1         | 1         |
| Ppfia4_j5             | 1.19751     | 2.59094         | 0          | 1         | 1         |
| Tmem183a_j4           | 2.11056     | 2.46182         | 0          | 1         | 1         |
| Ppp1r12b              | 1.87598     | 1.36928         | 0          | 1         | 1         |
| Rnpep_j3              | 9.76983     | 10.4798         | 0.101208   | 0.410431  | 0.730298  |
| Shisa4_j8             | 8.94114     | 6.48314         | 0          | 1         | 1         |
| Ipo9_j4               | 1.96793     | 1.94963         | 0          | 1         | 1         |
| Nav1_j3               | 2.33537     | 1.87304         | 0          | 1         | 1         |
| Nav1_j4               | 4.33598     | 4.26447         | 0          | 1         | 1         |
| Camsap1l1_j6          | 0.145736    | 0               | 0          | 1         | 1         |
| 9230116N13Rik_j1      | 0.141829    | 0.000900948     | -7.29849   | 0.839885  | 0.949215  |
| Ptprc                 | 0.434284    | 0.849114        | 0.967318   | 0.0001123 | 0.0023736 |
| Cfh_j1                | 1.72154     | 1.868           | 0          | 1         | 1         |
| Gm15443               | 2.07691     | 1.78701         | -0.216891  | 0.393572  | 0.719561  |
| Pla2g4a               | 0.248949    | 1.74E-05        | -13.8013   | 0.97648   | 0.993154  |
| Hmcn1_j5              | 0.111653    | 0 -1.79769e+308 |            | 1.60E-07  | 1         |
| Hmcn1_j9              | 0.0852322   | 0 -1.79769e+308 |            | 3.33E-05  | 1         |
| ENSMUSG00000073540_j2 | 4.40766     | 7.09199         | 0          | 1         | 1         |
| Rgl1_j6               | 2.54631     | 1.74432         | 0          | 1         | 1         |
| Smg7_j4               | 0.524745    | 1.69546         | 0          | 1         | 1         |
| Lamc2_j5              | 0.0609453   | 2.99E-05        | -10.9948   | 0.956363  | 1         |
| AK029630_j1           | 0.201868    | 0.117229        | -0.784086  | 0.0794073 | 0.342156  |
| Cacna1e_j2            | 0.108929    | 0.0263266       | -2.0488    | 0.0176135 | 1         |
| Cacna1e_j3            | 0.281969    | 0.0988829       | -1.51174   | 0.0004927 | 0.0080412 |
| BC034090_j9           | 0.0390147   | 0.0495457       | 0.344741   | 0.755711  | 1         |
| Qsox1_j3              | 6.65511     | 7.05879         | 0.0849579  | 0.636613  | 0.859179  |
| Cep350                | 0.389366    | 0.379978        | 0          | 1         | 1         |
| Fam163a_j3            | 0.0693431   | 0.0735329       | 0.084637   | 0.927528  | 1         |
| Fam163a               | 0.126118    | 0.159073        | 0.334919   | 0.585277  | 0.833935  |
| XLOC_000964           | 0.101711    | 0.120986        | 0.250361   | 0.767868  | 1         |
| Rasal2_j2             | 0.122136    | 0 -1.79769e+308 |            | 9.13E-08  | 1         |
| Rasal2_j4             | 0.000695594 | 0.391372        | 9.13608    | 0.0281203 | 0.177947  |
| Pappa2_j4             | 0.113877    | 0               | 0          | 1         | 1         |

|             |           |                 |             |           |          |
|-------------|-----------|-----------------|-------------|-----------|----------|
| Rabgap1l_j2 | 2.10819   | 1.02889         | -1.03492    | 2.49E-08  | 1.60E-06 |
| Zbtb37_j1   | 0.998823  | 0.850013        | -0.232744   | 0.195533  | 0.537978 |
| Dars2_j3    | 0.979937  | 0.614252        | 0           | 1         | 1        |
| Al848100_j8 | 0.51375   | 0.185609        | 0           | 1         | 1        |
| Fmo4        | 0.122076  | 5.74E-06        | -14.3751    | 0.992485  | 1        |
| Fmo1_j2     | 6.33934   | 5.58291         | 0           | 1         | 1        |
| Fmo1_j1     | 4.07108   | 3.23125         | 0           | 1         | 1        |
| Prrx1       | 0.127912  | 0.0679016       | -0.913635   | 0.216869  | 1        |
| Prrx1       | 0.0797421 | 0.190571        | 1.25692     | 0.0300358 | 0.185903 |
| Gorab_j1    | 2.27509   | 2.30458         | 0           | 1         | 1        |
| Blzf1       | 4.08799   | 4.74989         | 0           | 1         | 1        |
| Atp1b1_j5   | 1.39882   | 1.23352         | 0           | 1         | 1        |
| Mpz1_j2     | 3.84463   | 4.34275         | 0           | 1         | 1        |
| Pou2f1      | 0.147221  | 0.152684        | 0.0525717   | 0.932758  | 0.979616 |
| Mael        | 0.193184  | 0 -1.79769e+308 |             | 8.20E-06  | 0.00026  |
| Uck2_j4     | 10.6129   | 16.5763         | 0           | 1         | 1        |
| Rgs4_j5     | 24.3014   | 39.2988         | 0           | 1         | 1        |
| Uap1_j2     | 4.77919   | 6.02066         | 0           | 1         | 1        |
| Atf6_j3     | 0.55771   | 0.359533        | 0           | 1         | 1        |
| Fcrlb_j1    | 0.263416  | 0.132042        | -0.99635    | 0.243376  | 0.590641 |
| Pcp4l1_j2   | 67.7702   | 54.4496         | 0           | 1         | 1        |
| Tomm40l_j1  | 11.9837   | 10.5702         | 0           | 1         | 1        |
| Ndufs2_j2   | 21.7475   | 22.4759         | 0           | 1         | 1        |
| Ufc1        | 20.2035   | 20.1161         | -0.00625302 | 0.958566  | 0.988071 |
| Ly9_j5      | 0.0529283 | 0 -1.79769e+308 |             | 0.0279644 | 1        |
| Ly9_j4      | 0.0511485 | 0 -1.79769e+308 |             | 0.0343651 | 1        |
| Kcnj9_j1    | 0.0551665 | 0 -1.79769e+308 |             | 0.0184668 | 1        |
| Slamf8_j1   | 0.103102  | 0 -1.79769e+308 |             | 0.023961  | 1        |
| Cadm3_j3    | 0.725214  | 0.722529        | 0           | 1         | 1        |
| Gm16340_j1  | 0.466382  | 0.318245        | -0.551374   | 0.0831378 | 0.351364 |
| Gm16340_j3  | 0.14108   | 0.0467769       | -1.59264    | 0.122929  | 0.436491 |
| Rgs7_j2     | 0.511678  | 0               | 0           | 1         | 1        |
| Rgs7_j3     | 0.733653  | 0               | 0           | 1         | 1        |
| Rgs7_j4     | 6.45516   | 5.68338         | 0           | 1         | 1        |
| Opn3_j1     | 1.73841   | 1.93864         | 0.157281    | 0.628219  | 0.855241 |
| XLOC_001063 | 0.152472  | 0.110968        | -0.458407   | 0.590397  | 0.836589 |
| Pld5        | 3.03877   | 2.47258         | 0           | 1         | 1        |
| Pld5_j1     | 0.0830923 | 0.0726753       | 0           | 1         | 1        |
| Cep170_j6   | 7.47891   | 8.53852         | 0           | 1         | 1        |
| Cep170_j7   | 0.704856  | 0.638044        | 0           | 1         | 1        |
| Akt3_j4     | 3.61177   | 2.06301         | 0           | 1         | 1        |
| Akt3_j5     | 0.252266  | 0               | 0           | 1         | 1        |
| Akt3_j6     | 5.28241   | 2.87734         | 0           | 1         | 1        |
| Hnrnpu_j5   | 5.09717   | 9.25279         | 0.860194    | 8.10E-08  | 4.47E-06 |
| Smyd3_j6    | 2.38706   | 2.7298          | 0.193563    | 0.167585  | 0.504088 |
| Ahctf1_j1   | 0.0761519 | 0.0212291       | -1.84283    | 0.0641892 | 1        |
| Psen2_j1    | 13.7045   | 12.6079         | 0           | 1         | 1        |

|             |             |                        |           |           |          |
|-------------|-------------|------------------------|-----------|-----------|----------|
| H3f3a       | 28.7203     | 29.5825                | 0.0426734 | 0.707819  | 0.893525 |
| Ephx1_j1    | 20.2887     | 17.0063                | 0         | 1         | 1        |
| Enah_j2     | 1.10787     | 1.30175                | 0.232665  | 0.177796  | 0.517223 |
| Enah_j3     | 0.119735    | 0 -1.79769e+308        |           | 6.25E-09  | 1        |
| Capn2       | 1.43541     | 1.14598                | 0         | 1         | 1        |
| Capn2_j7    | 0.707614    | 0                      | 0         | 1         | 1        |
| Tgfb2_j6    | 0.0712242   | 0 -1.79769e+308        |           | 0.0066312 | 1        |
| Rrp15_j1    | 1.58354     | 1.2321                 | -0.362034 | 0.424332  | 0.739743 |
| Kctd3_j1    | 0.451117    | 0.40376                | -0.160003 | 0.718942  | 0.898913 |
| Kcnk2_j1    | 0.333061    | 0.478318               | 0.522183  | 0.187282  | 0.528229 |
| Vash2       | 0.183378    | 0.458409               | 0         | 1         | 1        |
| Mfsd7b_j3   | 0.249617    | 0.110031               | 0         | 1         | 1        |
| Atf3_j2     | 2.23054     | 24.7874                | 0         | 1         | 1        |
| Ppp2r5a_j6  | 0.590752    | 0.489319               | -0.271779 | 0.529228  | 0.802396 |
| Rcor3_j6    | 1.44238     | 1.8454                 | 0         | 1         | 1        |
| Sertad4_j4  | 0.752216    | 0.0515651              | 0         | 1         | 1        |
| XLOC_001127 | 0           | 0.0832615 1.79769e+308 |           | 0.0596014 | 1        |
| XLOC_001127 | 0.0886831   | 0 -1.79769e+308        |           | 0.0165845 | 1        |
| AA408296_j4 | 0.208218    | 0.252876               | 0.280337  | 0.512622  | 0.792284 |
| AA408296_j3 | 0.114083    | 0 -1.79769e+308        |           | 3.01E-05  | 1        |
| G0s2        | 7.20834     | 6.18586                | -0.220692 | 0.2581    | 0.606703 |
| XLOC_001132 | 0.44025     | 0.277817               | -0.664189 | 0.482957  | 0.77583  |
| XLOC_001132 | 0.0969724   | 0 -1.79769e+308        |           | 0.0464947 | 1        |
| XLOC_001132 | 0.192854    | 0.0840942              | -1.19743  | 0.175514  | 0.514043 |
| CD46_j4     | 0.307049    | 0.167249               | -0.876469 | 0.0666954 | 0.308554 |
| Tcea1_j8    | 0.108054    | 0.0512539              | -1.07602  | 0.579129  | 1        |
| Tcea1_j7    | 0.529475    | 0.692738               | 0.387747  | 0.399009  | 0.72264  |
| Atp6v1h     | 36.3105     | 39.6263                | 0         | 1         | 1        |
| Rb1cc1_j2   | 0.653509    | 0.495627               | -0.398952 | 0.364137  | 0.698291 |
| Sgk3        | 0           | 0.545336               | 0         | 1         | 1        |
| Prex2_j7    | 0.186733    | 0.252557               | 0.435636  | 0.221277  | 0.568372 |
| Prex2_j11   | 1.23966     | 1.15141                | -0.106549 | 0.564123  | 0.823141 |
| Sulf1_j2    | 0.991689    | 0.866139               | 0         | 1         | 1        |
| Crispld1    | 0           | 0.0692427 1.79769e+308 |           | 0.029951  | 1        |
| Paqr8_j2    | 8.15028     | 6.57762                | 0         | 1         | 1        |
| AK188812_j2 | 1.04054     | 1.633                  | 0.650197  | 0.257986  | 0.606629 |
| Rab23_j2    | 0.00147875  | 0.23489                | 0         | 1         | 1        |
| Fam123c_j2  | 0.000143522 | 2.84571                | 0         | 1         | 1        |
| XLOC_000049 | 0.0676069   | 0.160405               | 0         | 1         | 1        |
| Hs6st1_j2   | 18.8419     | 19.0528                | 0         | 1         | 1        |
| Cnnm4_j3    | 2.62911     | 2.46501                | 0         | 1         | 1        |
| Zap70_j1    | 0           | 0.0573464 1.79769e+308 |           | 0.179558  | 1        |
| XLOC_000058 | 0.0724201   | 0.175671               | 1.27841   | 0.258846  | 0.607577 |
| Inpp4a_j7   | 2.37395     | 2.03025                | 0         | 1         | 1        |
| Inpp4a_j9   | 7.04447     | 6.2997                 | 0         | 1         | 1        |
| Npas2_j1    | 1.54E-05    | 0.403229               | 14.6773   | 0.963915  | 0.989793 |
| Npas2       | 0.0203616   | 0.148976               | 2.87116   | 0.0129148 | 1        |

|                  |             |           |              |            |           |           |
|------------------|-------------|-----------|--------------|------------|-----------|-----------|
| Rpl31_j2         | 0           | 0.611954  | 1.79769e+308 | 3.02E-05   | 0.0007781 |           |
| Rpl31_j1         | 0.326259    | 0.541374  |              | 0.730607   | 0.176217  | 0.514862  |
| Map4k4_j2        | 7.54314     | 7.92765   |              | 0.0717274  | 0.513866  | 0.793006  |
| Map4k4_j8        | 11.1586     | 14.0075   |              | 0.328033   | 0.0009007 | 0.0131748 |
| Il1r1_j1         | 0.000243254 | 0.21134   |              | 0          | 1         | 1         |
| Slc9a2_j1        | 0.0313318   | 0.144227  |              | 2.20265    | 0.0759558 | 1         |
| Gpr45_j1         | 2.98861     | 2.53063   |              | 0          | 1         | 1         |
| Nck2_j1          | 0.472352    | 1.1171    |              | 1.24183    | 0.0002584 | 0.0047476 |
| Bivm_j1          | 0.145906    | 0.124488  |              | 0          | 1         | 1         |
| Bivm_j4          | 0.509284    | 0.244019  |              | 0          | 1         | 1         |
| Ercc5_j4         | 0.156075    | 1.32664   |              | 0          | 1         | 1         |
| Dnahc7b_j1       | 0.108367    | 0.175205  |              | 0.693118   | 0.451496  | 0.756717  |
| Dnahc7b_j3       | 0.243929    | 0.257755  |              | 0.0795374  | 0.906566  | 0.970402  |
| XLOC_000093      | 0.109057    | 0.269209  |              | 1.30364    | 0.166254  | 0.502849  |
| XLOC_000093      | 0.203506    | 0.194998  |              | -0.0616144 | 0.933078  | 0.979673  |
| Tmeff2_j3        | 1.93326     | 3.05054   |              | 0          | 1         | 1         |
| Tmeff2_j7        | 22.6165     | 24.308    |              | 0          | 1         | 1         |
| Tmeff2_j8        | 9.67653     | 8.59793   |              | 0          | 1         | 1         |
| Sdpr             | 1.27557     | 1.0915    |              | 0          | 1         | 1         |
| XLOC_000097      | 0.0849241   | 0.0382783 |              | -1.14965   | 0.421678  | 1         |
| Stat1_j7         | 0           | 0.0665553 |              | 0          | 1         | 1         |
| Stat1            | 0.159653    | 0.0891558 |              | 0          | 1         | 1         |
| Osgepl1_j1       | 2.31138     | 2.57561   |              | 0.156159   | 0.540559  | 0.808873  |
| Hspe1_j2         | 4.70855     | 4.74165   |              | 0.0101053  | 0.946958  | 0.98431   |
| Mobkl3_j1        | 1.31861     | 1.41012   |              | 0.0968005  | 0.855035  | 0.954109  |
| 1700066M21Rik_j2 | 4.34814     | 3.60396   |              | 0          | 1         | 1         |
| Spats2l_j6       | 0.349934    | 0.301807  |              | -0.213455  | 0.752541  | 0.914477  |
| Spats2l_j9       | 0.46471     | 0.397008  |              | -0.227163  | 0.699751  | 0.889447  |
| Aox1_j6          | 0.608012    | 1.39028   |              | 1.1932     | 7.68E-05  | 0.0017118 |
| Nif3l1_j3        | 6.3599      | 6.53139   |              | 0          | 1         | 1         |
| Cflar_j7         | 0.0874021   | 0.246016  |              | 1.49301    | 0.0020913 | 0.0259045 |
| Fam117b_j3       | 5.62305     | 6.93517   |              | 0          | 1         | 1         |
| Nbeal1           | 0.120267    | 0.122684  |              | 0.0287146  | 0.939083  | 1         |
| Nbeal1_j1        | 0           | 0.0659374 | 1.79769e+308 |            | 0.0001837 | 1         |
| Cyp20a1_j2       | 0           | 0.105079  | 1.79769e+308 |            | 0.125365  | 1         |
| Cyp20a1_j3       | 0.151169    | 0.426857  |              | 1.4976     | 0.0543527 | 0.271922  |
| Pth2r_j2         | 0           | 0.0561154 | 1.79769e+308 |            | 0.10532   | 1         |
| Mtap2_j2         | 0.273093    | 0.235158  |              | -0.215765  | 0.583943  | 0.833209  |
| Mtap2_j8         | 0.00674473  | 0.232676  |              | 5.10842    | 0.0004128 | 0.0069439 |
| Mtap2_j11        | 0.310509    | 0.259318  |              | -0.259913  | 0.508225  | 0.790152  |
| Unc80_j5         | 0.885077    | 0.538228  |              | 0          | 1         | 1         |
| AK084284_j2      | 0           | 0.0893719 | 1.79769e+308 |            | 0.0319959 | 1         |
| Igfbp2_j1        | 0           | 0.255923  | 1.79769e+308 |            | 0.0380396 | 0.216694  |
| Arcp2_j1         | 0           | 0.43526   | 1.79769e+308 |            | 0.0104145 | 0.0881213 |
| Slc11a1_j5       | 0           | 0.122666  | 1.79769e+308 |            | 0.0374348 | 1         |
| Stk36_j8         | 0           | 0.0637766 | 1.79769e+308 |            | 0.015645  | 1         |
| Stk36_j6         | 0           | 0.0740464 | 1.79769e+308 |            | 0.0103686 | 1         |

|                  |            |           |              |           |           |
|------------------|------------|-----------|--------------|-----------|-----------|
| Stk36            | 0.201103   | 0.277491  | 0.464511     | 0.350675  | 0.687982  |
| Ttll4            | 0.157543   | 0.257947  | 0.711325     | 0.0521934 | 0.265207  |
| Ttll4_j1         | 0.235405   | 0.247152  | 0.0702556    | 0.826593  | 0.944121  |
| XLOC_000177      | 0          | 0.0977707 | 1.79769e+308 | 0.049775  | 1         |
| Speg_j11         | 0.729255   | 0.536244  | -0.443534    | 0.194826  | 0.537206  |
| Speg_j13         | 1.22234    | 1.29299   | 0.0810618    | 0.623333  | 0.852781  |
| Gmppa            | 5.71397    | 5.14043   | 0            | 1         | 1         |
| Accn4_j1         | 0.0659107  | 0.0321671 | -1.03493     | 0.428942  | 1         |
| Stk11ip_j1       | 0.193265   | 0.422524  | 1.12845      | 0.0218405 | 0.149749  |
| Slc4a3_j9        | 0.579719   | 0.53659   | 0            | 1         | 1         |
| Sgpp2            | 43.1707    | 31.0937   | -0.47343     | 7.23E-08  | 4.08E-06  |
| 9430031J16Rik    | 1.5759     | 1.13445   | -0.474173    | 0.0150211 | 0.115071  |
| Rhbdd1_j2        | 0          | 0.797446  | 1.79769e+308 | 1.38E-08  | 9.41E-07  |
| Agfg1_j7         | 3.44422    | 2.55092   | -0.433163    | 0.0029508 | 0.034017  |
| Agfg1_j9         | 3.05493    | 5.24103   | 0.778711     | 2.16E-09  | 1.71E-07  |
| Sp100_j3         | 0.179903   | 0.174763  | -0.0418228   | 0.946354  | 0.984036  |
| Sp100_j4         | 0.175857   | 0.400061  | 1.18582      | 0.0193093 | 0.137521  |
| Ptma_j1          | 0.135882   | 0.245794  | 0.855098     | 0.179651  | 0.519346  |
| Cops7b_j1        | 0.146761   | 0.10812   | 0            | 1         | 1         |
| AK006434_j1      | 0.0531523  | 0.0645257 | 0.279743     | 0.862271  | 1         |
| AK006434_j2      | 0          | 0.147657  | 1.79769e+308 | 0.0198349 | 1         |
| Efhd1_j1         | 0.280598   | 0.81094   | 1.53109      | 0.003219  | 0.0364931 |
| Inpp5d_j3        | 0.0281739  | 0.0544948 | 0.951761     | 0.40165   | 1         |
| Atg16l1_j2       | 0.00792963 | 0.658668  | 0            | 1         | 1         |
| Heatr7b1_j1      | 0          | 0.110738  | 1.79769e+308 | 0.0004455 | 1         |
| Trpm8_j4         | 0          | 0.440535  | 0            | 1         | 1         |
| Agap1_j3         | 0          | 0.0730114 | 0            | 1         | 1         |
| Agap1_j5         | 0.273696   | 0.316142  | 0            | 1         | 1         |
| Ube2f_j5         | 0.327093   | 0.367005  | 0.1661       | 0.485671  | 0.777216  |
| Scly_j1          | 0.704485   | 0.986899  | 0.486334     | 0.306054  | 0.651424  |
| Traf3ip1         | 0.621001   | 0.612644  | -0.019548    | 0.959533  | 0.988456  |
| Rnpepl1_j1       | 0          | 0.15651   | 0            | 1         | 1         |
| Rnpepl1_j2       | 0.804172   | 2.69471   | 0            | 1         | 1         |
| Capn10_j3        | 9.49116    | 9.51539   | 0.00367785   | 0.975547  | 0.992893  |
| Sned1_j1         | 0.514102   | 0.636817  | 0.308824     | 0.0911727 | 0.371149  |
| Ppp1r7_j2        | 0          | 0.359197  | 0            | 1         | 1         |
| AK144617_j2      | 0.0822005  | 0.139035  | 0.758226     | 0.538706  | 1         |
| Cntnap5b_j5      | 0.268549   | 0.226102  | -0.248209    | 0.480992  | 0.774691  |
| Cdh20_j1         | 0.14214    | 0.145736  | 0.0360481    | 0.955025  | 0.987084  |
| AK039635         | 0.10422    | 0.140369  | 0.429587     | 0.740057  | 1         |
| 2310035C23Rik_j3 | 1.62628    | 1.35123   | -0.267306    | 0.254658  | 0.602888  |
| Tnfrsf11a_j2     | 0.813495   | 0.572602  | 0            | 1         | 1         |
| Phlpp1_j1        | 3.35692    | 3.10492   | -0.112583    | 0.533027  | 0.804768  |
| Serpinb5_j1      | 0.0360553  | 0.286002  | 2.98774      | 0.0043169 | 0.0454931 |
| Serpinb5_j4      | 0          | 0.259817  | 1.79769e+308 | 0.0004282 | 0.0071557 |
| Serpinb12_j2     | 0.0722306  | 0.101317  | 0.488193     | 0.70549   | 1         |
| Cntnap5a_j4      | 0.285039   | 0.604251  | 1.08399      | 0.185516  | 0.525826  |

|                  |           |           |              |           |           |
|------------------|-----------|-----------|--------------|-----------|-----------|
| Cntnap5a_j5      | 0.63499   | 0.970726  | 0.61233      | 0.000763  | 0.0115254 |
| Tmem185b         | 2.02188   | 2.81575   | 0.477818     | 0.0174038 | 0.127817  |
| C1ql2            | 0.106297  | 0.366841  | 1.78705      | 0.0001665 | 0.0032946 |
| R3hdm1_j1        | 1.17053   | 2.44082   | 0            | 1         | 1         |
| R3hdm1           | 2.76451   | 2.4672    | 0            | 1         | 1         |
| R3hdm1_j10       | 1.15083   | 1.64067   | 0            | 1         | 1         |
| Eif2d_j1         | 8.56035   | 8.75174   | 0            | 1         | 1         |
| Eif2d            | 1.16718   | 1.00388   | 0            | 1         | 1         |
| Klhdc8a_j2       | 10.8574   | 9.17789   | -0.24244     | 0.101952  | 0.395654  |
| Plekha6_j1       | 10.0919   | 8.24427   | -0.29174     | 0.0125273 | 0.101335  |
| Etnk2_j1         | 0.0624977 | 0.104478  | 0.741324     | 0.384434  | 1         |
| Kdm5b_j2         | 0         | 0.155321  | 0            | 1         | 1         |
| Arl8a_j1         | 1.72953   | 3.16796   | 0.873172     | 0.0269123 | 0.172876  |
| Arl8a_j3         | 0.589367  | 1.15483   | 0.97044      | 0.200024  | 0.54322   |
| Csrp1_j1         | 0         | 0.400118  | 0            | 1         | 1         |
| Tnni1_j2         | 0.0302979 | 0.101382  | 1.74252      | 0.34128   | 1         |
| Dennd1b_j6       | 0         | 0.109764  | 1.79769e+308 | 0.0005736 | 1         |
| Kcnt2_j3         | 0         | 0.164356  | 1.79769e+308 | 0.0001004 | 0.0021626 |
| Kcnt2_j7         | 0.131585  | 0.198456  | 0.592827     | 0.387822  | 0.715426  |
| Kcnt2_j10        | 0.31758   | 0.207878  | -0.611384    | 0.275638  | 0.624585  |
| Glrx2            | 12.2763   | 10.7865   | -0.186652    | 0.455588  | 0.759324  |
| Uchl5_j3         | 8.72736   | 9.58924   | 0            | 1         | 1         |
| Ivns1abp_j1      | 15.5353   | 18.1866   | 0.227324     | 0.0393038 | 0.221389  |
| XLOC_000376      | 0.100559  | 0.239971  | 1.25482      | 0.0120549 | 0.0985281 |
| Arpc5_j1         | 0         | 2.58741   | 1.79769e+308 | 3.41E-05  | 0.000863  |
| Rnasel_j2        | 0.166105  | 0.358841  | 0            | 1         | 1         |
| Rnasel_j3        | 0.363187  | 0.272721  | 0            | 1         | 1         |
| Glul_j1          | 0.387981  | 0.525888  | 0            | 1         | 1         |
| XLOC_000387      | 0.123541  | 0.123441  | -0.00116661  | 0.998708  | 1         |
| Abl2_j1          | 0.548712  | 0.73542   | 0.422519     | 0.043175  | 0.235781  |
| Sec16b_j6        | 0.0929743 | 0.0916887 | -0.0200893   | 0.983606  | 1         |
| Sec16b_j11       | 0.159867  | 0.202125  | 0.338378     | 0.634737  | 0.858242  |
| Rfwd2_j4         | 0.269357  | 1.50225   | 2.47953      | 0.0312778 | 0.190899  |
| Rfwd2_j9         | 0.0977722 | 0.117553  | 0.265815     | 0.824687  | 1         |
| Tnr              | 0.0721888 | 0.241819  | 1.74408      | 6.77E-06  | 0.0002212 |
| Tnr_j2           | 0.0924994 | 0.0605323 | -0.611738    | 0.252807  | 1         |
| 4930523C07Rik_j1 | 0.0431635 | 0.0971512 | 1.17042      | 0.405115  | 1         |
| 4930523C07Rik_j3 | 0.0278596 | 0.117101  | 2.0715       | 0.204777  | 1         |
| Rc3h1_j2         | 1.81333   | 2.71075   | 0            | 1         | 1         |
| Gas5_j3          | 25.0901   | 29.9302   | 0.254481     | 0.116396  | 0.424447  |
| Ankrd45_j6       | 0.334772  | 1.13884   | 0            | 1         | 1         |
| Scyl3_j2         | 0         | 0.412082  | 0            | 1         | 1         |
| Scyl3_j9         | 1.99316   | 1.76532   | 0            | 1         | 1         |
| AK042927_j4      | 0         | 0.112004  | 1.79769e+308 | 0.086694  | 1         |
| Ildr2            | 0.109196  | 0.121083  | 0.149078     | 0.771963  | 1         |
| Ildr2_j4         | 0.893956  | 2.10947   | 1.23861      | 2.11E-14  | 3.86E-12  |
| 1700009P17Rik_j6 | 0.159874  | 0.238467  | 0            | 1         | 1         |

|                  |           |           |               |           |           |
|------------------|-----------|-----------|---------------|-----------|-----------|
| Dedd_j1          | 1.90061   | 1.9776    | 0             | 1         | 1         |
| Arhgap30         | 0.141438  | 0.332653  | 1.23385       | 0.0029759 | 0.034249  |
| F11r_j1          | 1.67889   | 2.11025   | 0             | 1         | 1         |
| Cd84             | 6.96E-06  | 0.178667  | 14.6479       | 0.990377  | 0.997044  |
| Igsf8_j3         | 5.8561    | 14.5587   | 1.31387       | 0         | 0         |
| Tagln2_j1        | 0.960094  | 1.60073   | 0.737485      | 0.182759  | 0.523227  |
| Aim2_j2          | 0         | 0.0651108 | 1.79769e+308  | 0.0591525 | 1         |
| Pyhin1           | 0.0734265 | 0.243789  | 1.73126       | 0.0026914 | 0.031679  |
| EG545391_j4      | 0.189597  | 0.164768  | -0.202498     | 0.746601  | 0.911752  |
| Pppde1           | 0.86468   | 0.73605   | 0             | 1         | 1         |
| Kif26b           | 0.261612  | 0.197183  | 0             | 1         | 1         |
| Cnst_j3          | 0.0587868 | 0.0778478 | 0.405165      | 0.72457   | 1         |
| Itpkb_j2         | 0.0104408 | 0.317528  | 0             | 1         | 1         |
| Itpkb_j8         | 0         | 0.806243  | 0             | 1         | 1         |
| XLOC_000496      | 0         | 0.0598445 | 1.79769e+308  | 0.119861  | 1         |
| Lefty1_j1        | 0         | 0.0640396 | 1.79769e+308  | 0.113528  | 1         |
| Tmem63a_j1       | 0.856245  | 0.727425  | 0             | 1         | 1         |
| XLOC_000504      | 0.100158  | 0.199876  | 0.99682       | 0.446428  | 0.753343  |
| Cnih3_j4         | 0.502527  | 0.295921  | -0.76399      | 0.235293  | 0.58252   |
| XLOC_000505      | 0.0843121 | 0.105963  | 0.32975       | 0.596131  | 1         |
| XLOC_000509      | 0.0747575 | 0.236348  | 1.66062       | 0.22835   | 0.575412  |
| Tlr5             | 0.0663509 | 0.237397  | 1.83912       | 0.0129422 | 0.103727  |
| XLOC_000515      | 0         | 0.0544862 | 1.79769e+308  | 0.11503   | 1         |
| XLOC_000516      | 0.0286427 | 0.0752963 | 1.39441       | 0.422995  | 1         |
| XLOC_000517      | 0.10151   | 0.16606   | 0.710088      | 0.357686  | 0.693526  |
| Eprs_j3          | 10.1152   | 8.17467   | 0             | 1         | 1         |
| AK020767         | 0.0320743 | 0.11026   | 1.78141       | 0.266871  | 1         |
| AK021325_j1      | 2.32977   | 1.73966   | -0.421383     | 0.0136327 | 0.107458  |
| AK021325_j3      | 0.309016  | 0.288096  | -0.10113      | 0.815444  | 0.939924  |
| Lpgat1_j1        | 0.781705  | 0.570102  | 0             | 1         | 1         |
| Lpgat1_j2        | 0         | 0.118741  | 0             | 1         | 1         |
| Irf6_j1          | 0.915354  | 0.889074  | 0             | 1         | 1         |
| Lamb3_j5         | 0         | 0.0768821 | 1.79769e+308  | 0.0141379 | 1         |
| Lamb3_j4         | 0.17939   | 0.188917  | 0.0746544     | 0.875189  | 0.960239  |
| XLOC_000548      | 5.99E-05  | 0.166914  | 11.444        | 1         | 1         |
| A330023F24Rik_j1 | 0.059405  | 0.114241  | 0.943426      | 0.180564  | 1         |
| A330023F24Rik_j6 | 0.0582507 | 0         | -1.79769e+308 | 0.0016957 | 1         |
| Sox17_j5         | 0.472829  | 1.0245    | 1.11552       | 0.0025456 | 0.0302697 |
| Sox17_j6         | 0.184944  | 0.197392  | 0.0939695     | 0.881295  | 0.962323  |
| AK142999_j1      | 0.136956  | 0.469925  | 1.77872       | 0.0548976 | 0.273277  |
| Sntg1_j4         | 0.222049  | 0.386248  | 0.798653      | 0.125751  | 0.441571  |
| Sntg1_j6         | 0.333779  | 0.0422722 | -2.98111      | 0.0205331 | 0.14351   |
| 2610203C22Rik_j1 | 0.0459373 | 0.206336  | 2.16726       | 0.0189692 | 0.135954  |
| Slco5a1          | 0.667982  | 0.318734  | -1.06746      | 0.0002544 | 0.0046833 |
| Ncoa2_j4         | 0.567713  | 1.20948   | 0             | 1         | 1         |
| Ube2w_j3         | 9.31641   | 10.8344   | 0.217775      | 0.462583  | 0.763368  |
| Pkhd1_j1         | 0         | 0.0513371 | 1.79769e+308  | 0.119316  | 1         |



|                  |           |           |              |           |           |
|------------------|-----------|-----------|--------------|-----------|-----------|
| Mcm3_j1          | 0.149621  | 0.230483  | 0.623344     | 0.281493  | 0.629909  |
| Tram2_j2         | 0.0118872 | 0.0806871 | 2.76293      | 0.337327  | 1         |
| Tram2_j3         | 0.0892949 | 0.0329019 | -1.44041     | 0.431214  | 1         |
| Kcnq5_j6         | 0.978144  | 1.20905   | 0            | 1         | 1         |
| Rims1_j3         | 2.65941   | 2.15232   | 0            | 1         | 1         |
| Rims1_j4         | 1.44115   | 1.63374   | 0            | 1         | 1         |
| Rims1_j24        | 0.689409  | 0.673925  | -0.0327721   | 0.924113  | 0.976334  |
| Smap1_j2         | 4.53801   | 3.93913   | 0            | 1         | 1         |
| Fam135a_j5       | 0.402375  | 0.300763  | -0.419913    | 0.243428  | 0.590641  |
| Fam135a_j1       | 0         | 0.428816  | 1.79769e+308 | 7.91E-08  | 4.38E-06  |
| Bai3_j3          | 0.263821  | 0.182572  | 0            | 1         | 1         |
| Phf3_j5          | 0.512028  | 0.934847  | 0            | 1         | 1         |
| XLOC_000617      | 5.49154   | 4.75798   | -0.206863    | 0.262287  | 0.611355  |
| Prim2_j2         | 0         | 0.562337  | 1.79769e+308 | 0.0041679 | 0.0441903 |
| XLOC_000619      | 0.0595482 | 0.0538825 | -0.144243    | 0.937699  | 1         |
| Ccdc115          | 0.126283  | 0.207579  | 0            | 1         | 1         |
| Fam168b_j1       | 0         | 1.31181   | 0            | 1         | 1         |
| Fam168b          | 5.55896   | 6.05101   | 0            | 1         | 1         |
| Uggt1_j6         | 0.433358  | 1.41578   | 0            | 1         | 1         |
| Neurl3_j4        | 0         | 0.166269  | 1.79769e+308 | 0.0060685 | 0.0590832 |
| Kiaa1310         | 6.63845   | 8.91252   | 0            | 1         | 1         |
| Lman2l_j2        | 0.204784  | 0.108339  | -0.918547    | 0.0879794 | 0.36319   |
| Ankrd23_j3       | 0.452888  | 1.07017   | 1.24061      | 4.63E-05  | 0.0011187 |
| Ankrd39_j1       | 0.864218  | 0.877423  | 0.0218772    | 0.941504  | 0.982178  |
| Sema4c_j1        | 0         | 0.386436  | 0            | 1         | 1         |
| Sema4c_j2        | 1.2041    | 1.48055   | 0            | 1         | 1         |
| Actr1b_j3        | 29.1371   | 43.2539   | 0            | 1         | 1         |
| Mgat4a_j1        | 1.06955   | 0.460202  | 0            | 1         | 1         |
| Txndc9_j3        | 0.639104  | 0.611828  | -0.0629252   | 0.827482  | 0.944495  |
| Txndc9_j5        | 0.640152  | 0.565968  | -0.177694    | 0.556894  | 0.819299  |
| Txndc9_j6        | 2.09316   | 2.91402   | 0.477326     | 0.0426241 | 0.233479  |
| Chst10_j2        | 0         | 0.0929192 | 0            | 1         | 1         |
| Chst10_j3        | 0         | 0.0593307 | 0            | 1         | 1         |
| Tbc1d8_j1        | 1.7321    | 1.75544   | 0.0193138    | 0.922807  | 0.975936  |
| AK041998_j4      | 0.0274477 | 0.173425  | 2.65956      | 0.111795  | 0.416168  |
| Uxs1_j1          | 0.0597899 | 0.0268049 | 0            | 1         | 1         |
| Uxs1             | 1.70517   | 1.83767   | 0            | 1         | 1         |
| 1700029F09Rik_j3 | 0.738926  | 1.57034   | 1.08757      | 1         | 1         |
| Kdelc1_j2        | 1.33992   | 1.82976   | 0            | 1         | 1         |
| Slc40a1_j1       | 0         | 0.146894  | 1.79769e+308 | 0.0045826 | 1         |
| Myo1b_j3         | 2.72693   | 2.73974   | 0            | 1         | 1         |
| Mfsd6_j4         | 3.82086   | 3.30716   | 0            | 1         | 1         |
| Inpp1_j2         | 2.53093   | 3.73762   | 0            | 1         | 1         |
| 1700019D03Rik    | 0.319773  | 0.256672  | -0.317119    | 0.479138  | 0.77352   |
| 1700019D03Rik_j2 | 0.233485  | 0.0916701 | -1.34881     | 0.058653  | 0.284695  |
| 1700019D03Rik_j1 | 0.312568  | 0.149361  | -1.06537     | 0.0668949 | 0.309154  |
| Pms1_j2          | 0.0376094 | 0.0768234 | 1.03045      | 0.342196  | 1         |

|                  |           |           |              |           |          |
|------------------|-----------|-----------|--------------|-----------|----------|
| Pms1_j3          | 0.0438449 | 0.178591  | 2.02618      | 0.0182976 | 0.132527 |
| Hecw2_j4         | 0         | 0.137737  | 0            | 1         | 1        |
| Hspd1_j4         | 0         | 0.0695481 | 1.79769e+308 | 0.118996  | 1        |
| Kctd18_j7        | 1.16137   | 1.82225   | 0.649891     | 0.0268554 | 0.172643 |
| Clk1_j3          | 4.27472   | 3.70953   | 0            | 1         | 1        |
| Fam126b_j4       | 0.737253  | 0.902922  | 0.292442     | 0.175339  | 0.51373  |
| Als2cr12_j1      | 0.693222  | 0.390786  | -0.82694     | 0.0615384 | 0.293157 |
| Als2cr12_j2      | 0.370133  | 0.398436  | 0.106304     | 0.8194    | 0.941524 |
| Als2cr4          | 3.66184   | 5.50883   | 0            | 1         | 1        |
| Als2_j4          | 3.12225   | 3.06253   | -0.0278636   | 0.891275  | 0.965668 |
| Ica1l_j5         | 1.09642   | 1.24595   | 0.184454     | 0.661338  | 0.871639 |
| Klf7_j5          | 0         | 0.0653954 | 0            | 1         | 1        |
| Fam119a_j1       | 0.711714  | 0.312609  | -1.18694     | 0.0309544 | 0.189737 |
| 1110028C15Rik_j3 | 0.214016  | 0.260962  | 0.286124     | 0.482035  | 0.775384 |
| Bard1_j5         | 0.0927223 | 0.0622688 | -0.574407    | 0.618308  | 1        |
| Fn1_j1           | 0.0822352 | 0.212368  | 1.36874      | 0.0125404 | 0.101407 |
| Fn1              | 0.0790984 | 0.157678  | 0.995257     | 0.316186  | 0.659988 |
| Tns1_j6          | 5.14998   | 5.24493   | 0            | 1         | 1        |
| Tns1_j7          | 7.8359    | 6.71872   | 0            | 1         | 1        |
| Aamp_j2          | 1.36222   | 1.79143   | 0.39515      | 0.162711  | 0.498068 |
| Aamp_j1          | 12.242    | 12.373    | 0.0153645    | 0.904247  | 0.969463 |
| Tmbim1_j7        | 12.4969   | 14.3589   | 0.200382     | 0.0571014 | 0.279957 |
| Usp37_j7         | 0.985833  | 0.925356  | 0            | 1         | 1        |
| Zfp142           | 0.20978   | 0.15906   | 0            | 1         | 1        |
| Rnf25_j1         | 0.267849  | 0.35488   | 0            | 1         | 1        |
| Atg9a_j7         | 0.431244  | 0.290619  | 0            | 1         | 1        |
| Atg9a_j6         | 0.0268125 | 0.139817  | 0            | 1         | 1        |
| Atg9a_j8         | 1.66311   | 1.30443   | 0            | 1         | 1        |
| Atg9a            | 1.69611   | 1.43433   | 0            | 1         | 1        |
| Tuba4a_j2        | 220.652   | 186.4     | 0            | 1         | 1        |
| Ptprn_j4         | 9.02054   | 12.2399   | 0            | 1         | 1        |
| Ptprn            | 41.6896   | 36.5345   | 0            | 1         | 1        |
| Dnpep_j1         | 0.141019  | 0.424155  | 0            | 1         | 1        |
| Obsl1_j4         | 3.9123    | 5.7448    | 0            | 1         | 1        |
| Obsl1_j3         | 11.376    | 9.60015   | 0            | 1         | 1        |
| Farsb            | 1.6077    | 1.98451   | 0.303789     | 0.30459   | 0.65004  |
| Scg2_j4          | 0.135106  | 0.145939  | 0            | 1         | 1        |
| Wdfy1_j5         | 0.75983   | 1.1473    | 0            | 1         | 1        |
| Wdfy1_j6         | 0.521562  | 0.536304  | 0            | 1         | 1        |
| Serpine2_j1      | 0         | 1.7304    | 1.79769e+308 | 1.44E-09  | 1.18E-07 |
| Dock10_j4        | 0         | 0.228524  | 0            | 1         | 1        |
| Col4a4_j1        | 0         | 0.0769016 | 1.79769e+308 | 0.0041415 | 1        |
| Trip12_j1        | 1.95048   | 3.00126   | 0            | 1         | 1        |
| Trip12_j3        | 0.126746  | 0.106484  | 0            | 1         | 1        |
| Sp110_j7         | 0         | 0.144454  | 1.79769e+308 | 0.0689044 | 1        |
| Ncl_j1           | 3.32691   | 6.12063   | 0.879499     | 6.75E-07  | 2.95E-05 |
| Ecel1_j2         | 0         | 0.0981346 | 1.79769e+308 | 0.001122  | 1        |

|              |           |           |              |           |           |
|--------------|-----------|-----------|--------------|-----------|-----------|
| Ecel1_j6     | 0.0838447 | 0.186461  | 1.15308      | 0.0728148 | 0.324707  |
| Col6a3_j7    | 0.17449   | 0.130033  | -0.424261    | 0.273359  | 0.622512  |
| Per2_j3      | 0.0441884 | 0.403455  | 3.19067      | 0.0013716 | 0.0184243 |
| Hdac4_j4     | 0         | 0.233511  | 0            | 1         | 1         |
| Hdac4_j5     | 0         | 0.172257  | 0            | 1         | 1         |
| Kif1a_j1     | 69.5545   | 73.9847   | 0            | 1         | 1         |
| Kif1a        | 32.3855   | 5.78971   | 0            | 1         | 1         |
| Kif1a_j2     | 36.1605   | 11.2921   | 0            | 1         | 1         |
| Pask_j4      | 0.0687232 | 0.11688   | 0.766164     | 0.214537  | 1         |
| Hdlbp_j4     | 1.69195   | 1.12308   | 0            | 1         | 1         |
| Hdlbp_j5     | 0.723318  | 0.980642  | 0            | 1         | 1         |
| Stk25_j1     | 10.6406   | 15.6601   | 0            | 1         | 1         |
| Dtymk_j3     | 0.859514  | 0.933891  | 0.119734     | 0.804036  | 0.935022  |
| Ppip5k2_j5   | 2.10566   | 1.19099   | 0            | 1         | 1         |
| Pam_j4       | 0         | 0.270702  | 0            | 1         | 1         |
| Pam_j5       | 0         | 0.257111  | 0            | 1         | 1         |
| Pign_j7      | 0         | 0.0473117 | 1.79769e+308 | 0.021918  | 1         |
| Vps4b_j1     | 27.1077   | 29.7312   | 0.133278     | 0.176905  | 0.515993  |
| Cdh19_j8     | 0.607887  | 0.721315  | 0.246825     | 0.480098  | 0.77397   |
| Dsel_j1      | 1.0948    | 1.60937   | 0.555823     | 0.026286  | 0.170196  |
| XLOC_000841  | 0.17875   | 0.211287  | 0.241258     | 0.613825  | 0.847685  |
| XLOC_000842  | 0.0968991 | 0.156397  | 0.690659     | 0.517366  | 1         |
| XLOC_000842  | 0         | 0.132703  | 1.79769e+308 | 0.0504095 | 1         |
| Epb4.115_j3  | 0.0189101 | 0.0768399 | 2.0227       | 0.0419653 | 1         |
| Epb4.115_j11 | 0         | 0.0670568 | 1.79769e+308 | 0.0534079 | 1         |
| Ptpn4_j1     | 0         | 0.212634  | 0            | 1         | 1         |
| Ptpn4_j3     | 0.10998   | 0.0802804 | 0            | 1         | 1         |
| Ptpn4_j2     | 0.482957  | 0.316599  | 0            | 1         | 1         |
| Dbi_j2       | 24.3579   | 8.92468   | -1.44852     | 2.34E-05  | 0.0006308 |
| Dbi_j3       | 1.87865   | 2.15588   | 0.198577     | 0.694763  | 0.887421  |
| Insig2_j3    | 6.82421   | 7.62668   | 0            | 1         | 1         |
| AK043935_j1  | 0         | 0.0703678 | 1.79769e+308 | 0.209422  | 1         |
| Actr3_j6     | 68.2937   | 73.5937   | 0.107828     | 0.253629  | 0.60179   |
| Lypd1        | 0.115064  | 0.24844   | 1.11046      | 0.254128  | 0.602447  |
| Lypd1_j2     | 0.693381  | 0.417085  | -0.733309    | 0.208064  | 0.55225   |
| Zranb3       | 0.342087  | 0.309931  | -0.142418    | 0.712748  | 0.895927  |
| Cd55_j4      | 1.39543   | 2.32665   | 0.737547     | 0.0295134 | 0.183696  |
| Cd55_j6      | 0.0541333 | 0.0818981 | 0.597315     | 0.481231  | 1         |
| Pfkfb2_j6    | 0.165955  | 0.0864464 | 0            | 1         | 1         |
| Rassf5_j1    | 0.44407   | 0.527663  | 0            | 1         | 1         |
| Cntn2_j5     | 0.298188  | 0.225093  | 0            | 1         | 1         |
| Nfasc_j3     | 12.642    | 8.9872    | 0            | 1         | 1         |
| Mdm4_j9      | 1.13749   | 0.965358  | 0            | 1         | 1         |
| Sox13_j5     | 1.15494   | 1.00467   | 0            | 1         | 1         |
| Sox13_j6     | 0         | 0.434044  | 0            | 1         | 1         |
| Zc3h11a_j7   | 0         | 0.0468619 | 1.79769e+308 | 0.0158266 | 1         |
| Zc3h11a_j8   | 4.62798   | 4.29856   | -0.106527    | 0.436898  | 0.747343  |

|                       |             |           |              |           |           |
|-----------------------|-------------|-----------|--------------|-----------|-----------|
| Zc3h11a_j9            | 0           | 0.121726  | 1.79769e+308 | 0.0032    | 1         |
| Atp2b4_j9             | 0.695656    | 1.94567   | 0            | 1         | 1         |
| Adora1_j2             | 0.00215398  | 0.391745  | 0            | 1         | 1         |
| Adora1_j3             | 7.1913      | 7.01893   | 0            | 1         | 1         |
| Shisa4_j2             | 0.566752    | 2.27841   | 0            | 1         | 1         |
| Shisa4_j7             | 17.5608     | 22.2973   | 0            | 1         | 1         |
| Nav1_j8               | 0.274652    | 0.279464  | 0            | 1         | 1         |
| Nav1_j7               | 0.672443    | 0.863256  | 0            | 1         | 1         |
| Igfn1_j1              | 0.0304446   | 0.153508  | 2.33405      | 0.0133176 | 1         |
| Igfn1_j2              | 0.02675     | 0.234331  | 3.13094      | 6.79E-05  | 0.0015487 |
| Camsap1l1_j3          | 1.4685      | 0.897684  | 0            | 1         | 1         |
| 9230116N13Rik         | 0.0388302   | 0.159285  | 2.03636      | 0.129762  | 0.448694  |
| Nr5a2_j1              | 0.000429477 | 0.131324  | 8.25633      | 0.918143  | 1         |
| Hmcn1_j10             | 0.0328004   | 0.077315  | 1.23704      | 0.47659   | 1         |
| XLOC_000935           | 0.420648    | 0.520737  | 0.307942     | 0.546034  | 0.812821  |
| ENSMUSG00000073540_j5 | 24.6385     | 39.6724   | 0            | 1         | 1         |
| XLOC_000940           | 0.0340775   | 0.0773811 | 1.18316      | 0.352979  | 1         |
| Rgl1_j1               | 0.959929    | 0.877339  | 0            | 1         | 1         |
| Dhx9_j3               | 0.32698     | 0.290237  | 0            | 1         | 1         |
| AK044033_j1           | 0.166511    | 0.199806  | 0.262988     | 0.437917  | 0.747854  |
| Cacna1e_j7            | 0.182555    | 0.682765  | 1.90306      | 1.91E-11  | 2.21E-09  |
| BC034090_j10          | 0.251914    | 0.217474  | -0.212091    | 0.688034  | 0.884086  |
| BC034090_j11          | 0.407655    | 0.38753   | -0.0730393   | 0.851115  | 0.95267   |
| Xpr1_j3               | 0           | 0.14432   | 0            | 1         | 1         |
| Cep350_j4             | 0           | 0.134589  | 0            | 1         | 1         |
| Lap1B_j2              | 0           | 0.152982  | 1.79769e+308 | 0.0034616 | 1         |
| Fam20b_j1             | 9.80503     | 10.8414   | 0            | 1         | 1         |
| Ralgps2_j5            | 0           | 0.127829  | 0            | 1         | 1         |
| Ralgps2_j6            | 0.725821    | 0.733526  | 0            | 1         | 1         |
| Rasal2_j10            | 0.306488    | 0.26957   | -0.185169    | 0.573468  | 0.827643  |
| XLOC_000971           | 0.227862    | 0.200508  | -0.184507    | 0.560367  | 0.821088  |
| XLOC_000971           | 0.468337    | 0.381672  | -0.295213    | 1         | 1         |
| Pappa2_j2             | 0.301649    | 0.366607  | 0            | 1         | 1         |
| Al848100_j2           | 4.21159     | 4.22745   | 0            | 1         | 1         |
| Al848100_j4           | 0.114823    | 0.309739  | 0            | 1         | 1         |
| Prcc2c_j4             | 0.498208    | 0.451709  | 0            | 1         | 1         |
| Fmo4_j5               | 0.0781919   | 0.322242  | 2.04305      | 1         | 1         |
| Fmo1_j5               | 2.98604     | 3.12344   | 0            | 1         | 1         |
| Fmo2_j1               | 0.707786    | 0.708215  | 0            | 1         | 1         |
| Fmo2_j2               | 0.139815    | 0.14447   | 0            | 1         | 1         |
| Atp1b1_j2             | 0           | 24.1329   | 0            | 1         | 1         |
| Pou2f1_j1             | 0           | 0.251095  | 1.79769e+308 | 2.18E-08  | 1.42E-06  |
| Pou2f1_j2             | 1.11622     | 1.0024    | -0.155172    | 0.34685   | 0.685763  |
| Dusp27_j3             | 0           | 0.050618  | 1.79769e+308 | 0.0423419 | 1         |
| Uck2_j1               | 0           | 0.298701  | 0            | 1         | 1         |
| Uck2_j2               | 0.494646    | 2.92542   | 0            | 1         | 1         |
| XLOC_001013           | 0.0406629   | 0.17719   | 0            | 1         | 1         |

|                  |             |           |              |           |           |
|------------------|-------------|-----------|--------------|-----------|-----------|
| Pbx1_j4          | 0.592666    | 1.44945   | 0            | 1         | 1         |
| Rgs4_j8          | 121.941     | 124.42    | 0            | 1         | 1         |
| Rgs4_j6          | 3.10238     | 2.05292   | 0            | 1         | 1         |
| Rgs4_j7          | 0.78408     | 0.634557  | 0            | 1         | 1         |
| Hsd17b7_j2       | 4.39332     | 7.94597   | 0            | 1         | 1         |
| Ddr2_j2          | 0.503888    | 0.858128  | 0            | 1         | 1         |
| Ddr2_j3          | 0.0548899   | 0.339842  | 0            | 1         | 1         |
| Ddr2             | 0.185984    | 0.222703  | 0            | 1         | 1         |
| Uhmk1_j2         | 0           | 0.527979  | 0            | 1         | 1         |
| Atf6_j1          | 3.24768     | 3.45626   | 0            | 1         | 1         |
| Sdhc_j2          | 15.9135     | 18.3677   | 0            | 1         | 1         |
| Pcp4l1_j1        | 3.37876     | 2.46511   | 0            | 1         | 1         |
| Ndufs2_j1        | 2.74071     | 4.58114   | 0            | 1         | 1         |
| Ppox_j1          | 0.477082    | 0.552586  | 0.211961     | 0.382985  | 0.712839  |
| Ufc1_j1          | 2.06238     | 3.74762   | 0.861662     | 0.014598  | 0.112662  |
| Ly9_j2           | 0           | 0.0628312 | 1.79769e+308 | 0.149574  | 1         |
| Ly9_j3           | 0           | 0.0741295 | 1.79769e+308 | 0.0476616 | 1         |
| Slamf7_j1        | 0.0708098   | 0.228011  | 1.68708      | 0.0404075 | 0.225339  |
| Vangl2_j2        | 0.000364929 | 0.0582174 | 7.31769      | 0.607297  | 1         |
| Atp1a2_j1        | 15.1862     | 23.174    | 0            | 1         | 1         |
| Gm4955_j1        | 0.0822549   | 0.201332  | 1.2914       | 0.0083348 | 0.0748143 |
| AK145253_j3      | 0           | 0.0611697 | 1.79769e+308 | 0.0250815 | 1         |
| AK145253_j5      | 0.0486536   | 0.0460955 | -0.0779204   | 0.953227  | 1         |
| Pydc4_j1         | 0.0911087   | 0.129141  | 0.503287     | 0.439068  | 1         |
| Gm16340_j2       | 0.112737    | 0.322819  | 1.51776      | 1         | 1         |
| Ifi203_j1        | 0.831496    | 0.99742   | 0.262493     | 0.227601  | 0.574755  |
| Rgs7_j5          | 0           | 0.0809415 | 0            | 1         | 1         |
| Rgs7_j6          | 0.463996    | 1.09503   | 0            | 1         | 1         |
| Cep170_j14       | 1.21548     | 1.26881   | 0            | 1         | 1         |
| Akt3_j1          | 5.52395     | 3.12491   | 0            | 1         | 1         |
| AK046316_j1      | 0.379085    | 0.397187  | 0.0672966    | 0.904808  | 0.969711  |
| AK046316         | 0.575883    | 0.602683  | 0.0656248    | 0.828051  | 0.944579  |
| Smyd3_j7         | 0           | 0.0926029 | 1.79769e+308 | 0.196945  | 1         |
| Tfb2m_j4         | 0.0750009   | 0.23016   | 1.61766      | 0.116308  | 0.424391  |
| 6330403A02Rik    | 0.137451    | 0.241808  | 0.814949     | 0.0285816 | 0.179849  |
| 6330403A02Rik_j2 | 0.161116    | 0.060375  | -1.41607     | 0.221824  | 0.569027  |
| Ephx1_j2         | 4.17438     | 2.68837   | 0            | 1         | 1         |
| Nvl_j3           | 0.188824    | 0.159401  | -0.244383    | 0.726604  | 0.903195  |
| Capn2_j5         | 9.09946     | 7.53389   | 0            | 1         | 1         |
| Capn2_j6         | 49.2044     | 52.4359   | 0            | 1         | 1         |
| Tgfb2_j5         | 0           | 0.0519735 | 1.79769e+308 | 0.0637864 | 1         |
| Kctd3            | 6.50852     | 7.8998    | 0.279487     | 0.0226407 | 0.153572  |
| Kcnk2_j2         | 0           | 0.0766406 | 1.79769e+308 | 0.0368146 | 1         |
| Rps6kc1_j3       | 4.35297     | 4.81404   | 0            | 1         | 1         |
| Rps6kc1_j4       | 3.28971     | 3.57618   | 0            | 1         | 1         |
| Vash2_j3         | 0.146011    | 0.585922  | 0            | 1         | 1         |
| Tatdn3_j1        | 0.0452941   | 0.0683548 | 0.593719     | 0.491318  | 1         |

|                  |            |           |               |           |           |
|------------------|------------|-----------|---------------|-----------|-----------|
| Tatdn3_j2        | 0.364906   | 0.325888  | -0.163149     | 0.744713  | 0.910838  |
| Atf3_j5          | 2.05228    | 54.9054   | 0             | 1         | 1         |
| Ppp2r5a_j1       | 0.623166   | 0.789553  | 0.341419      | 0.257553  | 0.606306  |
| 1700034H15Rik_j1 | 0.300791   | 0.618366  | 1.0397        | 0.261382  | 0.610648  |
| Hhat_j7          | 7.18E-05   | 0.4411    | 12.5857       | 0.945531  | 0.983787  |
| Hhat_j8          | 0.00266836 | 0.242064  | 6.50329       | 0.14869   | 0.477528  |
| Syt14_j3         | 0.632977   | 0.813345  | 0             | 1         | 1         |
| Syt14_j2         | 0.159217   | 0.164627  | 0             | 1         | 1         |
| AA408296_j1      | 0.670075   | 1.15188   | 0.781591      | 0.0074708 | 0.0691439 |
| Traf3ip3_j1      | 0.299236   | 0.481663  | 0             | 1         | 1         |
| Traf3ip3_j2      | 0.101217   | 0.187147  | 0.886727      | 0.239857  | 0.587219  |
| XLOC_001132      | 0.174774   | 0.195275  | 0.160018      | 0.848658  | 0.952118  |
| C030002c11rik_j1 | 0.134977   | 0.340347  | 1.33429       | 0.0220021 | 0.150539  |
| Tcea1_j4         | 0.681623   | 0.651015  | -0.0662831    | 0.868694  | 0.958389  |
| Pcmdt1_j2        | 1.70253    | 3.82267   | 0             | 1         | 1         |
| Sgk3_j2          | 1.21886    | 0.696899  | 0             | 1         | 1         |
| 6030422M02Rik_j4 | 6.16E-06   | 0.102885  | 14.0271       | 0.996139  | 1         |
| Prex2_j4         | 0.0224348  | 0.0535759 | 1.25584       | 0.130997  | 1         |
| A830018L16Rik    | 0.596682   | 0.310288  | -0.943353     | 0.0978883 | 0.386642  |
| XLOC_000017      | 0.0644924  | 0.137018  | 1.08716       | 0.180376  | 1         |
| Sulf1_j3         | 0.63431    | 0.560175  | 0             | 1         | 1         |
| Kcnb2_j4         | 0.680481   | 0.71614   | 0.0736866     | 0.838977  | 0.948659  |
| XLOC_000023      | 0.263541   | 0.238914  | -0.141531     | 0.769911  | 0.921534  |
| Crispld1_j1      | 0          | 0.0518316 | 1.79769e+308  | 0.0329511 | 1         |
| Efhc1_j1         | 0.450476   | 0.394839  | -0.190187     | 0.717223  | 0.897961  |
| Tmem14a          | 3.35724    | 2.44773   | 0             | 1         | 1         |
| XLOC_000042      | 0.0621135  | 0.296497  | 2.25504       | 0.146727  | 0.475075  |
| XLOC_000042      | 0.102908   | 0.138488  | 0.428412      | 0.569044  | 1         |
| Rab23            | 1.0411     | 2.31032   | 0             | 1         | 1         |
| Rab23_j5         | 0.863305   | 0.704596  | 0             | 1         | 1         |
| Dst_j2           | 4.88985    | 4.35651   | 0             | 1         | 1         |
| Dst_j15          | 41.3515    | 44.8639   | 0             | 1         | 1         |
| Dst_j16          | 95.9502    | 106.543   | 0             | 1         | 1         |
| Imp4_j2          | 0.10642    | 0.224867  | 0             | 1         | 1         |
| mKIAA1112_j4     | 2.21277    | 1.47496   | 0             | 1         | 1         |
| mKIAA1112_j5     | 6.74706    | 5.44947   | 0             | 1         | 1         |
| Cox5b_j6         | 1.05698    | 2.08803   | 0.982193      | 0.0539673 | 0.270767  |
| Zap70_j3         | 0.0188746  | 0.122879  | 2.70273       | 0.236242  | 1         |
| Inpp4a_j5        | 0.727439   | 0.466665  | 0             | 1         | 1         |
| Pdcl3_j1         | 16.8281    | 26.1643   | 0.636724      | 1.85E-05  | 0.0005195 |
| Npas2_j2         | 0.10963    | 0.0920134 | -0.252729     | 0.745578  | 1         |
| Rpl31_j4         | 0.0505568  | 0         | -1.79769e+308 | 0.117911  | 1         |
| Rpl31_j3         | 0.0334546  | 0.183041  | 2.45189       | 0.174109  | 0.512143  |
| Map4k4_j6        | 0          | 0.0826821 | 1.79769e+308  | 0.0230109 | 1         |
| AI597479_j1      | 5.10484    | 5.20216   | 0             | 1         | 1         |
| Tpp2_j2          | 0.117609   | 0.373439  | 0             | 1         | 1         |
| Wdr75_j2         | 0.202166   | 0.374977  | 0             | 1         | 1         |

|                  |             |           |              |           |           |
|------------------|-------------|-----------|--------------|-----------|-----------|
| Tmeff2_j4        | 0           | 0.0830446 | 0            | 1         | 1         |
| Sdpr_j1          | 0           | 0.167284  | 0            | 1         | 1         |
| Stat1_j6         | 2.47322     | 1.75905   | 0            | 1         | 1         |
| Stat1_j8         | 6.53721     | 6.36224   | 0            | 1         | 1         |
| Tmem194b_j2      | 0.173737    | 0.361096  | 1.05548      | 0.0253532 | 0.165919  |
| XLOC_000099      | 0.0319807   | 0.0819614 | 1.35774      | 0.358881  | 1         |
| 1700066M21Rik_j1 | 1.31306     | 0.920817  | 0            | 1         | 1         |
| Spats2l_j2       | 0           | 0.109069  | 1.79769e+308 | 0.0685176 | 1         |
| Aox1_j5          | 4.29048     | 2.03082   | -1.07908     | 3.55E-08  | 2.18E-06  |
| Aox1_j8          | 8.62937     | 8.94824   | 0.0523496    | 0.769416  | 0.921491  |
| XLOC_000118      | 0.960092    | 0.784968  | -0.29054     | 0.10907   | 0.410772  |
| Bzw1_j3          | 2.89121     | 3.29287   | 0.187676     | 0.401937  | 0.725142  |
| Nif3l1_j1        | 3.03219     | 3.11337   | 0            | 1         | 1         |
| Cflar_j3         | 0.938737    | 0.53319   | -0.816072    | 0.0009676 | 0.0139255 |
| Casp8_j2         | 0.37028     | 0.592459  | 0.678099     | 0.241544  | 0.588627  |
| Cdk15_j4         | 6.10121     | 6.17775   | 0.017986     | 0.916959  | 0.97399   |
| XLOC_000126      | 0.584579    | 0.508966  | -0.199828    | 0.483331  | 0.775959  |
| Nbeal1_j4        | 0.333822    | 0.108833  | -1.61697     | 7.61E-06  | 0.0002444 |
| Nbeal1_j6        | 0.025793    | 0.0581214 | 1.17209      | 0.0780624 | 1         |
| Pard3b_j2        | 0.0181214   | 0.0568555 | 1.6496       | 0.159318  | 1         |
| Eef1b2_j2        | 22.6551     | 33.607    | 0            | 1         | 1         |
| Eef1b2_j5        | 113.124     | 159.81    | 0            | 1         | 1         |
| Pikfyve_j8       | 0.111174    | 0.229925  | 1.04834      | 0.0079448 | 0.0722008 |
| Mtap2_j10        | 0.979265    | 1.38884   | 0.504104     | 0.004357  | 0.0457967 |
| Unc80_j8         | 3.3146      | 2.05683   | 0            | 1         | 1         |
| AK084284_j4      | 0.331942    | 0.22621   | -0.55327     | 0.30692   | 0.652095  |
| Igfbp2_j5        | 0.000150973 | 1.21186   | 12.9706      | 0.935872  | 0.98034   |
| Slc11a1_j2       | 0.091561    | 0.224329  | 1.29281      | 0.280243  | 0.629039  |
| Rqcd1_j1         | 1.75646     | 2.25698   | 0            | 1         | 1         |
| Stk36_j5         | 0.131701    | 0.0682478 | -0.948407    | 0.172246  | 1         |
| Ttll4_j3         | 0           | 0.142176  | 1.79769e+308 | 0.0003135 | 1         |
| Wnt10a_j1        | 0.0149242   | 0.133924  | 3.16569      | 0.178052  | 1         |
| XLOC_000177      | 0.103809    | 0.110573  | 0.0910657    | 0.950383  | 1         |
| XLOC_000177      | 0           | 0.053329  | 1.79769e+308 | 0.0728534 | 1         |
| Fam134a_j1       | 0.216502    | 0.165214  | -0.390047    | 0.55989   | 0.820916  |
| Stk16_j2         | 5.26034     | 6.33827   | 0            | 1         | 1         |
| Stk16_j1         | 5.67192     | 4.42503   | 0            | 1         | 1         |
| Dnajb2_j2        | 0.153941    | 0.106251  | -0.534894    | 0.566927  | 0.824799  |
| Dnajb2_j4        | 0.23107     | 0.259138  | 0.165387     | 0.777217  | 0.924662  |
| Speg_j9          | 1.41581     | 1.9136    | 0.434664     | 0.044319  | 0.24008   |
| Accn4_j2         | 0.022337    | 0.11238   | 2.33088      | 0.227049  | 1         |
| Slc4a3_j2        | 0.0538242   | 0.080566  | 0            | 1         | 1         |
| Slc4a3_j10       | 2.47925     | 1.96359   | 0            | 1         | 1         |
| Mogat1_j1        | 0.414455    | 0.241613  | -0.77852     | 0.448276  | 0.754844  |
| Mrpl44_j1        | 0.460473    | 1.98506   | 2.10799      | 6.43E-06  | 0.000211  |
| Mff_j6           | 12.6006     | 17.5251   | 0            | 1         | 1         |
| Agfg1_j4         | 5.92745     | 7.3089    | 0.302243     | 0.0603765 | 0.289539  |

|                  |           |           |              |           |          |
|------------------|-----------|-----------|--------------|-----------|----------|
| Fbxo36           | 2.0065    | 1.9287    | 0            | 1         | 1        |
| BC100303_j1      | 0.0312934 | 0.125777  | 2.00694      | 0.212138  | 1        |
| Sp140_j1         | 0         | 0.0553117 | 1.79769e+308 | 0.165947  | 1        |
| Sp100_j1         | 0.229344  | 0.318949  | 0.475809     | 0.327799  | 0.670398 |
| Ptma_j5          | 93.3584   | 97.6197   | 0.0643918    | 0.489173  | 0.779521 |
| Gigyf2_j1        | 0.821653  | 2.30559   | 0            | 1         | 1        |
| Inpp5d_j2        | 0         | 0.0498556 | 1.79769e+308 | 0.031057  | 1        |
| Trpm8_j2         | 0.0610677 | 0.108796  | 0            | 1         | 1        |
| Sh3bp4_j3        | 0         | 0.291255  | 0            | 1         | 1        |
| Agap1_j2         | 0.766624  | 0.999216  | 0            | 1         | 1        |
| Agap1_j6         | 1.1026    | 0.966285  | 0            | 1         | 1        |
| Gpc1_j3          | 29.7272   | 41.7184   | 0            | 1         | 1        |
| XLOC_000248      | 0.13337   | 0.210227  | 0.656511     | 0.195715  | 0.538297 |
| Gpr35            | 0         | 0.154594  | 0            | 1         | 1        |
| Sned1_j2         | 0.459264  | 0.550293  | 0.260874     | 0.276927  | 0.625985 |
| D2hgdh_j1        | 0.131453  | 0.27237   | 1.05102      | 0.396169  | 0.721006 |
| Cdh20_j2         | 0.402062  | 0.366708  | -0.132785    | 0.791287  | 0.930476 |
| 2310035C23Rik_j4 | 0.426254  | 0.238478  | -0.837859    | 0.0797278 | 0.343104 |
| Serpinb5_j7      | 0         | 0.303464  | 1.79769e+308 | 0.0241797 | 0.160549 |
| Cntnap5a_j3      | 0.0459652 | 0.103232  | 1.16728      | 0.040885  | 1        |
| Clasp1_j3        | 2.83573   | 2.85645   | 0            | 1         | 1        |
| Ccdc93_j1        | 0         | 0.695153  | 0            | 1         | 1        |
| Faim3_j2         | 0.0942911 | 0.599336  | 2.66817      | 0.0243357 | 0.16129  |
| 5430435G22Rik_j3 | 0         | 0.102488  | 1.79769e+308 | 0.0336575 | 1        |
| Elk4_j4          | 1.51721   | 1.46461   | 0            | 1         | 1        |
| Dstyk_j1         | 3.60244   | 3.46509   | 0            | 1         | 1        |
| Lrrn2_j1         | 9.825     | 5.46225   | 0            | 1         | 1        |
| Pik3c2b_j2       | 0.788086  | 0.809059  | 0.0378921    | 0.845278  | 0.951062 |
| Fmod_j1          | 0.089256  | 0.204225  | 1.19414      | 0.119266  | 0.429649 |
| Chi3l1_j4        | 0.595327  | 0.329199  | -0.854722    | 0.322839  | 0.665895 |
| Adipor1_j3       | 0.890946  | 0.64316   | -0.47016     | 0.186985  | 0.527962 |
| Kdm5b_j1         | 2.05111   | 3.54913   | 0            | 1         | 1        |
| Csrp1_j2         | 23.0381   | 33.4701   | 0            | 1         | 1        |
| Tnni1_j3         | 0.320958  | 0.767116  | 1.25706      | 0.125741  | 0.441571 |
| Kif21b_j3        | 0.0529663 | 0.0370204 | 0            | 1         | 1        |
| XLOC_000358      | 0.0498438 | 0.152522  | 1.61353      | 0.159746  | 1        |
| Dennd1b_j1       | 9.34E-05  | 0.0926566 | 9.95402      | 0.712359  | 1        |
| Aspm_j2          | 0         | 0.0492077 | 1.79769e+308 | 0.14192   | 1        |
| Fam5c            | 0         | 0.626969  | 1.79769e+308 | 1.02E-07  | 5.50E-06 |
| XLOC_000376      | 0         | 0.0507944 | 1.79769e+308 | 0.0732246 | 1        |
| Glt25d2_j1       | 1.22661   | 1.56056   | 0            | 1         | 1        |
| Ncf2_j2          | 0.0784618 | 0.116288  | 0.567639     | 0.741669  | 1        |
| Ncf2_j3          | 3.97E-05  | 0.460303  | 13.5026      | 0.985246  | 0.995689 |
| mKIAA0479_j3     | 20.5961   | 19.3663   | -0.0888227   | 0.330692  | 0.672484 |
| Rgs8_j3          | 1.77568   | 0.869232  | 0            | 1         | 1        |
| Glul_j2          | 23.0726   | 37.7804   | 0            | 1         | 1        |
| Tor1aip2_j4      | 0.769765  | 0.832047  | 0            | 1         | 1        |



|             |            |                        |           |           |           |
|-------------|------------|------------------------|-----------|-----------|-----------|
| BC026585_j2 | 0.0263869  | 0.11285                | 2.09651   | 0.133254  | 1         |
| BC026585_j1 | 0          | 0.124477 1.79769e+308  |           | 0.0255933 | 1         |
| Sec16b_j4   | 0          | 0.0865259 1.79769e+308 |           | 0.0566034 | 1         |
| Sec16b_j12  | 0.119217   | 0.262467               | 1.13855   | 0.209737  | 0.554155  |
| Astn1_j1    | 13.2835    | 13.8755                | 0.0629026 | 0.537994  | 0.807846  |
| Rfwd2_j8    | 0.245351   | 0.289114               | 0.23679   | 0.797011  | 0.932581  |
| Rfwd2_j15   | 9.60135    | 11.5656                | 0.268535  | 0.175961  | 0.514547  |
| Ankrd45     | 3.71988    | 3.40029                | 0         | 1         | 1         |
| Ankrd45_j8  | 0          | 0.182936               | 0         | 1         | 1         |
| Vamp4_j2    | 15.4698    | 15.8887                | 0         | 1         | 1         |
| Scyl3_j10   | 0.752817   | 1.24256                | 0         | 1         | 1         |
| Slc19a2_j2  | 0.132438   | 0.395378               | 1.57791   | 0.0073656 | 0.0683912 |
| AK042927_j1 | 0          | 0.0762908 1.79769e+308 |           | 0.0243378 | 1         |
| AK042927_j5 | 0.0518394  | 0.0168173              | -1.62411  | 0.371805  | 1         |
| AK042927_j6 | 1.84E-05   | 0.077241               | 12.037    | 0.975654  | 1         |
| XLOC_000430 | 0.0446528  | 0.260254               | 2.5431    | 0.0533101 | 0.268707  |
| Ildr2_j2    | 0          | 0.0835468 1.79769e+308 |           | 0.0015377 | 1         |
| Adamts4_j1  | 0.0400866  | 0.115815               | 0         | 1         | 1         |
| XLOC_000454 | 0.517132   | 0.450598               | -0.198691 | 0.35985   | 0.695038  |
| Dedd_j2     | 6.9667     | 7.12888                | 0         | 1         | 1         |
| Arhgap30_j1 | 0          | 0.062365 1.79769e+308  |           | 0.0164031 | 1         |
| Usf1_j3     | 1.39691    | 1.83483                | 0         | 1         | 1         |
| Usf1_j7     | 0.87212    | 1.05368                | 0         | 1         | 1         |
| Copa_j4     | 26.8445    | 34.2543                | 0         | 1         | 1         |
| Dcaf8_j1    | 45.0265    | 49.6319                | 0         | 1         | 1         |
| Igsf9_j3    | 0          | 0.0705331 1.79769e+308 |           | 0.0393051 | 1         |
| Aim2_j5     | 0          | 0.146557 1.79769e+308  |           | 0.0668395 | 1         |
| Aim2_j8     | 0          | 0.095556 1.79769e+308  |           | 0.105624  | 1         |
| Fmn2_j1     | 0          | 0.0666983 1.79769e+308 |           | 0.021106  | 1         |
| Zfp238      | 0.485261   | 0.460018               | 0         | 1         | 1         |
| Pppde1_j1   | 0.354246   | 0.238955               | 0         | 1         | 1         |
| XLOC_000483 | 0.0673013  | 0.190366               | 1.50007   | 0.173801  | 0.511794  |
| Cnst        | 6.2782     | 4.10567                | -0.612734 | 3.24E-05  | 0.0008278 |
| XLOC_000489 | 0.782132   | 0.680904               | -0.19996  | 0.807711  | 0.936671  |
| Itpkb_j5    | 0          | 0.0626622              | 0         | 1         | 1         |
| XLOC_000496 | 0.225792   | 0.129619               | -0.800717 | 0.461653  | 0.762954  |
| XLOC_000496 | 0.0671635  | 0.100267               | 0.578091  | 0.554653  | 1         |
| Tmem63a_j2  | 1.9616     | 1.96049                | 0         | 1         | 1         |
| XLOC_000504 | 0.11186    | 0.130579               | 0.223234  | 0.677879  | 1         |
| Cnih3_j1    | 0          | 0.164305 1.79769e+308  |           | 0.0096915 | 0.0837629 |
| Srp9_j2     | 0          | 0.0669852 1.79769e+308 |           | 0.106925  | 1         |
| XLOC_000517 | 0.00628187 | 0.0633603              | 3.33431   | 0.382107  | 1         |
| Rab3gap2_j2 | 9.04293    | 8.2414                 | 0         | 1         | 1         |
| Rab3gap2_j1 | 4.5474     | 5.54603                | 0         | 1         | 1         |
| Eprs_j6     | 0.0165289  | 0.0676419              | 0         | 1         | 1         |
| nek2        | 0.197211   | 0.23809                | 0.271771  | 0.540391  | 0.808873  |
| Gm10516_j2  | 1.23632    | 1.01223                | 0         | 1         | 1         |

|                  |             |                        |            |           |           |
|------------------|-------------|------------------------|------------|-----------|-----------|
| Gm10516_j1       | 0.313307    | 0.328268               | 0          | 1         | 1         |
| Kcnh1_j1         | 4.21178     | 4.88004                | 0          | 1         | 1         |
| XLOC_000548      | 0           | 0.130542 1.79769e+308  | 0.0019641  |           | 1         |
| XLOC_000548      | 0.0810346   | 0.162749               | 1.00604    | 0.108811  | 0.410359  |
| A330023F24Rik_j5 | 0.429234    | 0.465433               | 0.11681    | 0.69798   | 0.888695  |
| Mrpl15_j1        | 5.02538     | 5.08791                | 0.0178427  | 0.911782  | 0.972265  |
| Mrpl15_j2        | 8.81394     | 10.5722                | 0.262419   | 0.243113  | 0.590533  |
| Rgs20_j3         | 0.796687    | 1.431                  | 0.844934   | 0.0003198 | 0.0056418 |
| XLOC_000560      | 0.0298053   | 0.0911527              | 1.61272    | 0.409351  | 1         |
| Sntg1_j7         | 0.127064    | 0.19239                | 0.598472   | 0.399039  | 0.722657  |
| Mybl1_j1         | 0           | 0.0788604 1.79769e+308 | 0.0118701  |           | 1         |
| Arfgef1_j2       | 13.893      | 16.0235                | 0          | 1         | 1         |
| Slco5a1_j4       | 0.228177    | 0.159717               | -0.514641  | 0.211796  | 0.556596  |
| Ncoa2_j2         | 0.857102    | 0.666095               | 0          | 1         | 1         |
| Ncoa2_j3         | 0.338936    | 0.371578               | 0          | 1         | 1         |
| Msc_j1           | 1.95406     | 1.97633                | 0.0163492  | 0.955038  | 0.987084  |
| AK015384_j1      | 0.0565247   | 0.200741               | 1.82838    | 0.185151  | 0.525341  |
| Rpl7_j5          | 9.16342     | 13.0554                | 0.510687   | 0.0132182 | 0.105281  |
| Rpl7_j8          | 3.9854      | 2.35561                | -0.758622  | 0.0041343 | 0.043977  |
| Stau2_j2         | 6.80796     | 10.6567                | 0          | 1         | 1         |
| Gm5828           | 3.27309     | 3.20939                | -0.0283513 | 0.855816  | 0.95442   |
| XLOC_000594      | 0.137634    | 0.284409               | 1.04713    | 0.16329   | 0.498618  |
| Tram2_j5         | 0           | 0.110047 1.79769e+308  | 0.0582753  |           | 1         |
| Kcnq5_j4         | 0.901273    | 0.234518               | 0          | 1         | 1         |
| Kcnq5_j3         | 0           | 0.132351               | 0          | 1         | 1         |
| Kcnq5_j2         | 0.700161    | 0.317865               | 0          | 1         | 1         |
| Rims1_j7         | 0.150572    | 0.262819               | 0          | 1         | 1         |
| Rims1_j13        | 0.10668     | 0 -1.79769e+308        | 0.0037882  |           | 1         |
| Rims1_j10        | 0.000380952 | 0.129241               | 8.40624    | 0.658955  | 1         |
| Rims1_j12        | 0.652882    | 0.320331               | -1.02726   | 0.0254349 | 0.16632   |
| Rims1_j11        | 0.318947    | 0.654648               | 1.0374     | 0.0126135 | 0.101846  |
| Smap1_j3         | 29.8477     | 30.8209                | 0          | 1         | 1         |
| Col19a1_j2       | 0.360009    | 0.4389                 | 0.28586    | 0.284751  | 0.633445  |
| Phf3_j4          | 3.83189     | 4.51571                | 0          | 1         | 1         |
| Uggt1_j5         | 0.373773    | 0.615812               | 0          | 1         | 1         |
| Neurl3_j2        | 0.000202138 | 0.105094               | 9.02212    | 0.815078  | 1         |
| Sema4c_j14       | 0.223493    | 0.42676                | 0          | 1         | 1         |
| Sema4c_j13       | 0.0563495   | 0.0422435              | 0          | 1         | 1         |
| Actr1b_j1        | 3.84902     | 4.25166                | 0          | 1         | 1         |
| 6330578E17Rik_j3 | 10.3627     | 14.6903                | 0          | 1         | 1         |
| Mgat4a_j7        | 0.0711331   | 0.26429                | 0          | 1         | 1         |
| 2010300C02Rik_j7 | 0           | 0.104116 1.79769e+308  | 0.0040418  |           | 1         |
| Aff3_j8          | 2.11143     | 3.11175                | 0          | 1         | 1         |
| Chst10_j4        | 9.82E-05    | 0.366306               | 0          | 1         | 1         |
| Creg2_j1         | 0.0652242   | 0.883074               | 0          | 1         | 1         |
| Creg2_j2         | 3.47506     | 2.13375                | 0          | 1         | 1         |
| Fhl2_j1          | 0.000285493 | 0.372142               | 10.3482    | 0.943101  | 0.982807  |

|                  |           |           |              |           |           |
|------------------|-----------|-----------|--------------|-----------|-----------|
| Uxs1_j7          | 1.56531   | 3.06205   | 0            | 1         | 1         |
| 1700029F09Rik_j4 | 0.252911  | 0.164336  | -0.621982    | 0.593153  | 0.83794   |
| Gls_j1           | 45.7473   | 53.3415   | 0.221573     | 0.0101417 | 0.0864174 |
| Inpp1_j4         | 5.15348   | 6.94053   | 0            | 1         | 1         |
| Pms1_j6          | 0.660987  | 0.627547  | -0.0748979   | 0.804181  | 0.935115  |
| XLOC_000678      | 0.0945838 | 0.157599  | 0.736594     | 0.382751  | 0.71274   |
| Hecw2_j3         | 0         | 0.222091  | 0            | 1         | 1         |
| Pgap1_j2         | 0         | 0.0784115 | 1.79769e+308 | 0.0660794 | 1         |
| Sf3b1_j3         | 2.45214   | 2.48038   | 0            | 1         | 1         |
| Hspd1_j9         | 0         | 3.99507   | 1.79769e+308 | 1.36E-06  | 5.41E-05  |
| Satb2            | 0.075216  | 0.190193  | 1.33836      | 0.0107989 | 0.0905709 |
| 1110034B05Rik    | 1.58423   | 1.61553   | 0.0282253    | 0.912978  | 0.972688  |
| Kctd18_j6        | 0.0677918 | 0.0451524 | -0.586308    | 0.674336  | 1         |
| Fam126b_j6       | 0         | 0.157578  | 1.79769e+308 | 4.26E-05  | 0.0010404 |
| Sumo1            | 0.526497  | 0.214516  | -1.29534     | 0.0823583 | 0.349625  |
| Raph1_j4         | 0         | 0.0543713 | 0            | 1         | 1         |
| XLOC_000710      | 0.0194975 | 0.163096  | 3.06436      | 0.0685998 | 0.313818  |
| Klf7_j2          | 4.50887   | 5.54294   | 0            | 1         | 1         |
| 1110028C15Rik_j2 | 0.52629   | 0.381339  | -0.464784    | 0.140651  | 0.466466  |
| Acadl_j2         | 19.6042   | 28.6692   | 0.548336     | 0.0001576 | 0.0031428 |
| Ikzf2_j1         | 0.15434   | 0.101671  | -0.602196    | 0.491949  | 0.780786  |
| Bard1_j3         | 0.0489462 | 0.11152   | 1.18804      | 0.418998  | 1         |
| Bard1_j4         | 0.0642211 | 0.0612769 | -0.067705    | 0.964268  | 1         |
| Abca12_j1        | 0         | 0.12911   | 1.79769e+308 | 0.0587251 | 1         |
| Fn1_j3           | 0         | 0.0682304 | 1.79769e+308 | 0.00554   | 1         |
| AK079660_j1      | 0.0921714 | 0.188025  | 1.02853      | 0.204507  | 0.548638  |
| Tns1_j10         | 6.62971   | 7.14776   | 0            | 1         | 1         |
| Aamp_j5          | 37.3679   | 40.9101   | 0.130657     | 0.179971  | 0.519626  |
| Usp37_j6         | 0.123786  | 0.313152  | 0            | 1         | 1         |
| Usp37_j5         | 0.0805246 | 0.25068   | 0            | 1         | 1         |
| Zfp142           | 1.27314   | 1.31133   | 0            | 1         | 1         |
| Zfp142_j2        | 0.0730381 | 0.105091  | 0            | 1         | 1         |
| Rnf25_j3         | 1.02386   | 1.12613   | 0            | 1         | 1         |
| Rnf25_j5         | 0         | 0.437869  | 0            | 1         | 1         |
| Nhej1_j1         | 1.84789   | 1.96708   | 0.0901815    | 0.786165  | 0.928434  |
| Atg9a_j5         | 0         | 0.444371  | 0            | 1         | 1         |
| Ptprn_j8         | 0.224919  | 0.494055  | 0            | 1         | 1         |
| Slc19a3          | 0.166986  | 0.353299  | 1.08116      | 0.0301546 | 0.18633   |
| Sphkap_j1        | 0.739644  | 1.25128   | 0            | 1         | 1         |
| Trip12_j6        | 0.631088  | 0.704431  | 0            | 1         | 1         |
| Trip12_j7        | 1.79798   | 1.29254   | 0            | 1         | 1         |
| Slc16a14_j3      | 0.292543  | 0.235058  | 0            | 1         | 1         |
| Sp110_j2         | 0.156177  | 0.300091  | 0.942215     | 0.0103625 | 0.0878183 |
| A630001G21Rik_j3 | 0.0964909 | 0.132493  | 0.457446     | 0.615619  | 1         |
| Ecel1_j4         | 0.11264   | 0.289862  | 1.36365      | 0.0013944 | 0.0186615 |
| Ecel1_j8         | 0.153396  | 1.22775   | 3.00069      | 4.96E-10  | 4.38E-08  |
| Ecel1_j9         | 0         | 0.207357  | 1.79769e+308 | 0.0002654 | 0.0048385 |

|               |             |           |              |           |           |
|---------------|-------------|-----------|--------------|-----------|-----------|
| Ecel1_j10     | 0           | 0.0605151 | 1.79769e+308 | 0.0282335 | 1         |
| Ngef_j1       | 0.114033    | 0.221043  | 0.954872     | 0.160972  | 0.495702  |
| A730008H23Rik | 8.02914     | 5.72026   | -0.489163    | 0.000214  | 0.0040541 |
| Hjurp_j4      | 8.73426     | 8.32913   | -0.0685192   | 0.563327  | 0.822528  |
| Col6a3_j9     | 0.0482482   | 0.11996   | 1.31401      | 0.0154123 | 1         |
| Ilkap_j4      | 1.795       | 2.29602   | 0.355154     | 0.307715  | 0.652771  |
| Per2_j6       | 0.0246029   | 0.06025   | 1.29213      | 0.184797  | 1         |
| Hdac4_j3      | 2.95528     | 1.08442   | 0            | 1         | 1         |
| Hdac4         | 0.00172619  | 0.217052  | 0            | 1         | 1         |
| Ndufa10_j1    | 39.7945     | 37.5361   | -0.0842907   | 0.448128  | 0.754689  |
| Myeov2_j2     | 12.9871     | 21.0464   | 0.696493     | 0.0050998 | 0.0514827 |
| Otos_j3       | 0.0179437   | 0.091359  | 2.34807      | 0.234858  | 1         |
| Kif1a_j6      | 0.0619553   | 1.31589   | 0            | 1         | 1         |
| Kif1a_j10     | 0.0983453   | 0.354776  | 0            | 1         | 1         |
| Pask_j8       | 0           | 0.0569381 | 1.79769e+308 | 0.0998524 | 1         |
| Pask_j9       | 0           | 0.0582382 | 1.79769e+308 | 0.0322189 | 1         |
| Hdlbp_j2      | 31.3678     | 35.5058   | 0            | 1         | 1         |
| Hdlbp_j3      | 0.0901364   | 0.297635  | 0            | 1         | 1         |
| Stk25_j2      | 15.7323     | 22.281    | 0            | 1         | 1         |
| Stk25_j3      | 47.8698     | 48.3075   | 0            | 1         | 1         |
| St8sia4_j1    | 1.09986     | 0.946857  | -0.216098    | 0.282923  | 0.631512  |
| Ppip5k2_j9    | 0.259591    | 0.286627  | 0            | 1         | 1         |
| Pam_j3        | 3.1687      | 2.98009   | 0            | 1         | 1         |
| Pign_j8       | 0.000769463 | 0.490005  | 9.31473      | 0.144985  | 0.472764  |
| Bcl2_j1       | 6.8277      | 5.75388   | -0.246866    | 0.0239664 | 0.159609  |
| Bcl2_j2       | 1.87429     | 1.71834   | -0.125333    | 0.546307  | 0.81297   |
| Inhbb_j1      | 3.07875     | 4.66161   | 0            | 1         | 1         |
| Ralb_j6       | 0.000191251 | 2.8242    | 0            | 1         | 1         |
| Ptpn4_j5      | 0           | 0.133112  | 0            | 1         | 1         |
| Ptpn4         | 0.000137081 | 0.129919  | 0            | 1         | 1         |
| Dbi_j6        | 0.0909001   | 0.291727  | 1.68226      | 0.357544  | 0.693444  |
| Htr5b_j2      | 0           | 0.0497913 | 1.79769e+308 | 0.10994   | 1         |
| Ddx18_j11     | 0           | 0.252869  | 1.79769e+308 | 0.0243938 | 0.161546  |
| Dpp10         | 1.79758     | 1.39515   | 0            | 1         | 1         |
| Actr3_j5      | 0           | 0.0903855 | 1.79769e+308 | 0.0675702 | 1         |
| Zranb3_j4     | 0.928195    | 0.768046  | -0.273235    | 0.374247  | 0.706986  |
| Pfkfb2_j1     | 0.847096    | 0.854766  | 0            | 1         | 1         |
| Pfkfb2        | 0.595201    | 1.26818   | 0            | 1         | 1         |
| Rassf5_j4     | 7.55381     | 7.72058   | 0            | 1         | 1         |
| Rassf5_j5     | 8.93427     | 6.0944    | 0            | 1         | 1         |
| Cntn2_j6      | 5.60932     | 9.15684   | 0            | 1         | 1         |
| Mdm4_j4       | 0           | 0.0541983 | 0            | 1         | 1         |
| Zc3h11a_j2    | 0.2321      | 0.241062  | 0.0546609    | 0.883674  | 0.963053  |
| Zc3h11a_j3    | 0.422628    | 0.390405  | -0.114418    | 0.753889  | 0.915071  |
| Shisa4_j3     | 3.40465     | 0.878924  | 0            | 1         | 1         |
| Shisa4_j4     | 10.7759     | 9.18564   | 0            | 1         | 1         |
| Nav1_j6       | 0.143027    | 0.133762  | 0            | 1         | 1         |

|             |             |           |              |           |           |
|-------------|-------------|-----------|--------------|-----------|-----------|
| Igfn1_j3    | 8.66E-06    | 0.0503323 | 12.504       | 0.981578  | 1         |
| Igfn1_j4    | 0           | 0.0550217 | 1.79769e+308 | 0.029032  | 1         |
| Ptprc       | 0.153705    | 0.274087  | 0.834469     | 0.0752732 | 0.331168  |
| Nek7_j2     | 18.8025     | 19.8482   | 0            | 1         | 1         |
| Rgs18       | 0.0776225   | 0.16058   | 1.04874      | 0.32213   | 0.665187  |
| Hmcn1_j1    | 0.562858    | 0.373037  | -0.593454    | 0.0800079 | 0.343808  |
| XLOC_000934 | 0.043391    | 0.0614623 | 0.502305     | 0.713545  | 1         |
| Rnf2_j1     | 0.238062    | 0.134046  | -0.828612    | 0.257372  | 0.606261  |
| XLOC_000938 | 0.401124    | 0.783779  | 0.966398     | 0.0371693 | 0.213511  |
| Tsen15_j1   | 0.286752    | 0.259239  | -0.145522    | 0.759089  | 0.917041  |
| Tsen15_j4   | 0.646461    | 0.828706  | 0.358297     | 0.542961  | 0.810598  |
| Lamc2_j3    | 0.173134    | 0.380551  | 1.1362       | 0.0788087 | 0.340449  |
| Lamc2_j4    | 0           | 0.0482407 | 1.79769e+308 | 0.0377118 | 1         |
| Lamc1_j2    | 1.58964     | 1.72843   | 0            | 1         | 1         |
| Cacna1e_j6  | 0           | 0.0570499 | 1.79769e+308 | 0.0038764 | 1         |
| Cacna1e_j8  | 0.0688695   | 0.04321   | -0.672501    | 0.699886  | 1         |
| BC034090_j7 | 0.0384102   | 0.0646032 | 0.750117     | 0.485881  | 1         |
| Qsox1_j2    | 0           | 0.149324  | 1.79769e+308 | 0.0236473 | 1         |
| Cep350_j6   | 0.081245    | 0.0297    | 0            | 1         | 1         |
| Fam163a_j4  | 7.78E-05    | 0.201667  | 11.3408      | 0.929374  | 0.978343  |
| Rasal2_j1   | 0.214321    | 0.565707  | 1.40028      | 1.45E-06  | 5.71E-05  |
| Pappa2_j3   | 0           | 0.0931902 | 0            | 1         | 1         |
| Rabgap1l_j1 | 6.9176      | 5.29899   | -0.384555    | 0.0019979 | 0.0249359 |
| Zbtb37_j5   | 0           | 0.165782  | 1.79769e+308 | 0.0005388 | 0.0086855 |
| AI848100_j3 | 2.213       | 2.50981   | 0            | 1         | 1         |
| Prrc2c_j8   | 0.788584    | 0.400981  | 0            | 1         | 1         |
| Fmo4_j2     | 0           | 0.0815536 | 1.79769e+308 | 0.0456516 | 1         |
| Fmo4_j1     | 0.0831289   | 0.0327205 | -1.34515     | 0.350463  | 1         |
| Fmo1        | 0.569377    | 0.282165  | 0            | 1         | 1         |
| Fmo2_j3     | 0.0761944   | 0.0597129 | 0            | 1         | 1         |
| Prrx1       | 0.0569925   | 0.100465  | 0.817854     | 0.475146  | 1         |
| Atp1b1_j3   | 323.437     | 165.766   | 0            | 1         | 1         |
| Tiprl_j3    | 15.7583     | 20.3122   | 0            | 1         | 1         |
| Dcaf6_j1    | 19.8987     | 22.0345   | 0.14709      | 0.138377  | 0.462546  |
| Pou2f1_j6   | 0           | 0.124604  | 1.79769e+308 | 8.65E-06  | 1         |
| XLOC_001006 | 0           | 0.151772  | 1.79769e+308 | 0.0013889 | 1         |
| Pogk        | 1.57163     | 1.64245   | 0            | 1         | 1         |
| BC056189_j1 | 0.367628    | 0.600234  | 0            | 1         | 1         |
| XLOC_001013 | 0.0718216   | 0.0522534 | 0            | 1         | 1         |
| Rgs4_j3     | 3.33076     | 6.70944   | 0            | 1         | 1         |
| Fcgr3_j1    | 0.000108099 | 0.279389  | 11.3357      | 0.928686  | 0.97809   |
| Ppox_j3     | 0.981634    | 1.19496   | 0.283704     | 0.095169  | 0.380809  |
| Ppox        | 0.319014    | 0.280755  | -0.184309    | 0.558772  | 0.82019   |
| Usp21_j3    | 4.02071     | 3.73815   | -0.105124    | 0.485348  | 0.777011  |
| Ly9_j1      | 5.74E-05    | 0.151034  | 11.3625      | 0.977479  | 1         |
| Vangl2_j3   | 0.0994286   | 0.0684164 | -0.539318    | 0.589811  | 1         |
| Pea15a_j3   | 55.9995     | 60.3451   | 0            | 1         | 1         |

|             |             |           |               |           |           |
|-------------|-------------|-----------|---------------|-----------|-----------|
| Atp1a2_j2   | 10.416      | 11.3238   | 0             | 1         | 1         |
| AK145253_j4 | 0.0159441   | 0.166635  | 3.38559       | 0.0376982 | 0.215509  |
| Rgs7        | 4.85618     | 4.62825   | 0             | 1         | 1         |
| Pld5_j7     | 0           | 0.51533   | 0             | 1         | 1         |
| Pld5_j9     | 3.34214     | 3.44775   | 0             | 1         | 1         |
| Pld5_j8     | 1.56876     | 1.00398   | 0             | 1         | 1         |
| Akt3_j7     | 10.0949     | 8.41173   | 0             | 1         | 1         |
| Adss_j1     | 5.61999     | 4.68339   | -0.263015     | 0.148359  | 0.477277  |
| Tfb2m_j3    | 0.392432    | 0.416541  | 0.0860171     | 0.820266  | 0.941821  |
| Tfb2m_j6    | 0.153914    | 0.172446  | 0.16402       | 0.869035  | 0.958391  |
| Tfb2m_j5    | 3.42089     | 2.94603   | -0.2156       | 0.401563  | 0.724812  |
| Ahctf1_j4   | 0.667723    | 0.320762  | -1.05775      | 0.0014331 | 0.0190435 |
| XLOC_001077 | 0.106357    | 0.152712  | 0.521898      | 0.674704  | 1         |
| XLOC_001077 | 0.492485    | 0.319842  | -0.622721     | 0.368669  | 0.701958  |
| XLOC_001081 | 0.0721383   | 0.0893034 | 0.307949      | 0.827441  | 1         |
| H3f3a_j2    | 0           | 0.122656  | 1.79769e+308  | 5.01E-05  | 1         |
| Degs1_j3    | 9.83373     | 39.2379   | 0             | 1         | 1         |
| Fbxo28_j1   | 4.18908     | 5.56831   | 0             | 1         | 1         |
| Tgfb2_j3    | 0           | 0.0735734 | 1.79769e+308  | 0.0290761 | 1         |
| Kctd3_j5    | 6.29784     | 5.51828   | -0.190638     | 0.247514  | 0.595013  |
| Kcnk2       | 2.44234     | 2.74867   | 0.170469      | 0.337605  | 0.678119  |
| Rps6kc1_j9  | 0           | 0.313222  | 0             | 1         | 1         |
| Vash2_j2    | 0.823723    | 1.61212   | 0             | 1         | 1         |
| Mfsd7b      | 2.26913     | 3.75859   | 0             | 1         | 1         |
| Tatdn3_j4   | 0.267135    | 0.202345  | -0.400753     | 0.418565  | 0.735371  |
| Atf3_j4     | 0.474197    | 1.36832   | 0             | 1         | 1         |
| Rcor3_j5    | 3.0398      | 3.47959   | 0             | 1         | 1         |
| Hhat_j5     | 0           | 0.108172  | 1.79769e+308  | 0.029476  | 1         |
| Hhat_j6     | 0.54509     | 0.106456  | -2.35623      | 0.0015052 | 0.0197857 |
| Sertad4_j3  | 2.07444     | 0.365192  | 0             | 1         | 1         |
| Sertad4_j2  | 0.000304531 | 0.919589  | 0             | 1         | 1         |
| AA408296_j5 | 0           | 0.0955295 | 1.79769e+308  | 0.193931  | 1         |
| Hsd11b1     | 5.43E-06    | 0.17872   | 15.0075       | 0.996312  | 0.999036  |
| CD46_j3     | 0.0719732   | 0         | -1.79769e+308 | 0.0015797 | 1         |
| CD46_j2     | 0           | 0.116169  | 1.79769e+308  | 0.0016362 | 1         |
| AK080352    | 0.00145083  | 0.245662  | 7.40366       | 0.575394  | 0.828312  |
| XLOC_000024 | 0           | 0.0647518 | 1.79769e+308  | 0.195464  | 1         |
| Ly96_j1     | 0.125745    | 0.528336  | 2.07096       | 0.0255391 | 0.166755  |
| Gdap1_j1    | 16.7606     | 14.3864   | 0             | 1         | 1         |
| Gm9884      | 0.0677124   | 0.13491   | 0.994502      | 0.353441  | 1         |
| Khdrbs2_j1  | 0.219145    | 0.29134   | 0.41082       | 0.511485  | 0.791595  |
| Rab23_j1    | 0.301529    | 0.455971  | 0             | 1         | 1         |
| Rab23_j4    | 0           | 0.13089   | 0             | 1         | 1         |
| Dst_j6      | 0.7343      | 0.918489  | 0             | 1         | 1         |
| Dst_j8      | 0           | 0.846749  | 0             | 1         | 1         |
| Dst_j9      | 15.8886     | 13.2598   | 0             | 1         | 1         |
| Dst_j18     | 43.9236     | 51.7794   | 0             | 1         | 1         |

|             |             |                        |            |           |           |
|-------------|-------------|------------------------|------------|-----------|-----------|
| Arhgef4     | 15.9751     | 8.40248                | 0          | 1         | 1         |
| Cnm4_j2     | 0           | 0.101875               | 0          | 1         | 1         |
| Vwa3b_j3    | 0           | 0.0670301 1.79769e+308 | 0.0804268  |           | 1         |
| Eif5b_j1    | 10.7566     | 13.3796                | 0.314809   | 0.0017058 | 0.0220128 |
| Npas2_j4    | 0           | 0.113859 1.79769e+308  | 0.0061855  |           | 1         |
| Rpl31_j5    | 0.308587    | 0.231463               | -0.414899  | 0.518584  | 0.796493  |
| Il1r2_j3    | 0.108485    | 0.341017               | 1.65235    | 0.122486  | 0.435603  |
| Tpp2_j3     | 12.2061     | 14.4835                | 0          | 1         | 1         |
| Bivm_j3     | 0.541349    | 0.554201               | 0          | 1         | 1         |
| Bivm_j6     | 0.167782    | 0.348212               | 0          | 1         | 1         |
| Ercc5_j1    | 1.15141     | 1.10328                | 0          | 1         | 1         |
| Ercc5_j2    | 0           | 0.32749                | 0          | 1         | 1         |
| Gulp1_j2    | 0.95914     | 0.71717                | 0          | 1         | 1         |
| Wdr75_j1    | 6.83912     | 6.89826                | 0          | 1         | 1         |
| Tmeff2_j9   | 32.9511     | 40.0842                | 0          | 1         | 1         |
| Stat1_j3    | 0.0345056   | 0.0872149              | 0          | 1         | 1         |
| Mstn_j1     | 0           | 0.0569582 1.79769e+308 | 0.076468   |           | 1         |
| XLOC_000104 | 0.0664842   | 0.115852               | 0.801202   | 0.314884  | 1         |
| Spats2l_j8  | 0           | 0.139296 1.79769e+308  | 0.0432964  |           | 1         |
| Aox1_j4     | 0.0727706   | 0.0959894              | 0.399519   | 0.67591   | 1         |
| Cflar_j1    | 0.103666    | 0.269579               | 1.37877    | 0.216622  | 0.562734  |
| Cdk15_j6    | 0.0849958   | 0.0928473              | 0.127468   | 0.842971  | 1         |
| Carf_j3     | 0.000107553 | 0.379267               | 0          | 1         | 1         |
| Carf_j2     | 0           | 0.0478987              | 0          | 1         | 1         |
| Carf_j4     | 0.634385    | 0.353339               | 0          | 1         | 1         |
| Nbeal1_j2   | 0.28863     | 0.163043               | -0.823968  | 0.212534  | 0.557606  |
| Nbeal1_j8   | 0           | 0.0983854 1.79769e+308 | 0.0770553  |           | 1         |
| Eef1b2_j1   | 1.00133     | 0.939789               | 0          | 1         | 1         |
| Eef1b2_j3   | 16.9967     | 22.1712                | 0          | 1         | 1         |
| Creb1_j2    | 1.31601     | 1.77857                | 0          | 1         | 1         |
| Pikfyve_j1  | 0.176083    | 0.288531               | 0.712472   | 0.464882  | 0.764951  |
| Pikfyve_j3  | 0.16538     | 0.0566151              | -1.54653   | 0.225447  | 0.572506  |
| Pikfyve_j2  | 0.0826691   | 0 -1.79769e+308        | 0.0177649  |           | 1         |
| Mtap2_j7    | 1.01747     | 0.992454               | -0.0359083 | 0.848995  | 0.95221   |
| Unc80_j4    | 0.159974    | 0.131264               | 0          | 1         | 1         |
| Unc80_j7    | 0.288393    | 0.156837               | 0          | 1         | 1         |
| Vwc2l       | 1.06255     | 0.619293               | -0.778831  | 0.0893044 | 0.366337  |
| Atic_j1     | 4.51685     | 6.01453                | 0          | 1         | 1         |
| AK084284_j3 | 0.0522021   | 0.0791741              | 0.600922   | 0.61636   | 1         |
| AK084284_j5 | 0           | 0.0792039 1.79769e+308 | 0.0483556  |           | 1         |
| Xrcc5_j3    | 0           | 0.056819 1.79769e+308  | 0.115438   |           | 1         |
| Smarcal1_j5 | 3.94898     | 5.83638                | 0.563595   | 0.0114543 | 0.0946995 |
| Igfbp2_j4   | 0           | 0.21847 1.79769e+308   | 0.0574847  |           | 0.28096   |
| Gm216_j4    | 0.0137665   | 0.0960422              | 2.80251    | 0.114877  | 1         |
| Gm216_j3    | 0.0820245   | 0.0604782              | -0.43964   | 0.699362  | 1         |
| Slc11a1_j4  | 0.0174989   | 0.0689039              | 1.97733    | 0.274003  | 1         |
| Plcd4_j1    | 3.29848     | 2.21224                | 0          | 1         | 1         |

|                  |             |           |              |           |          |
|------------------|-------------|-----------|--------------|-----------|----------|
| Wnt6_j1          | 2.06152     | 3.06495   | 0.572156     | 0.018567  | 0.133918 |
| Fam134a_j2       | 35.1644     | 36.5614   | 0.0562054    | 0.54891   | 0.814465 |
| Stk16            | 12.7336     | 13.648    | 0            | 1         | 1        |
| Des_j1           | 0.470619    | 0.566808  | 0.268303     | 0.665258  | 0.873092 |
| Speg_j7          | 0           | 0.142349  | 1.79769e+308 | 0.0081984 | 1        |
| Speg_j12         | 0.0302776   | 0.0670437 | 1.14685      | 0.140291  | 1        |
| Stk11ip_j4       | 5.05339     | 5.1704    | 0.0330224    | 0.863198  | 0.956634 |
| Slc4a3_j3        | 0.0691165   | 0.147646  | 0            | 1         | 1        |
| Slc4a3_j7        | 0.621046    | 0.222527  | 0            | 1         | 1        |
| Slc4a3_j14       | 0.521311    | 0.502799  | 0            | 1         | 1        |
| Sgpp2_j3         | 32.8488     | 28.2866   | -0.215722    | 0.0233804 | 0.156776 |
| Acs13_j1         | 6.84347     | 8.61991   | 0            | 1         | 1        |
| 9430031J16Rik_j2 | 0.462642    | 0.394235  | -0.230843    | 0.462508  | 0.763338 |
| Agfg1_j11        | 0.953864    | 1.03595   | 0.119097     | 0.591062  | 0.836826 |
| Fbxo36_j1        | 3.17999     | 3.20167   | 0            | 1         | 1        |
| Sp100_j9         | 0.199441    | 0.254588  | 0.352202     | 0.532573  | 0.804349 |
| Psm1_j5          | 23.6461     | 35.1492   | 0            | 1         | 1        |
| Armc9_j2         | 0.128029    | 0.101973  | -0.328286    | 0.718054  | 1        |
| Cops7b_j4        | 6.84947     | 7.583     | 0            | 1         | 1        |
| Dis3l2_j2        | 0           | 0.162926  | 0            | 1         | 1        |
| Gigyf2_j2        | 0.188339    | 0.288053  | 0            | 1         | 1        |
| Sag_j2           | 0.156433    | 0.0988447 | -0.662306    | 0.64872   | 0.864813 |
| Ugt1a6a_j2       | 0.000252165 | 1.26998   | 12.2982      | 0.847162  | 0.951638 |
| Sh3bp4_j1        | 0.000221033 | 0.523604  | 0            | 1         | 1        |
| Sh3bp4_j2        | 0.717009    | 0.213793  | 0            | 1         | 1        |
| Sh3bp4_j4        | 1.86349     | 1.80577   | 0            | 1         | 1        |
| Agap1_j1         | 0.0714715   | 0         | 0            | 1         | 1        |
| Lrrfip1_j4       | 1.96177     | 2.98889   | 0            | 1         | 1        |
| Ube2f_j3         | 2.94829     | 2.90943   | -0.019146    | 0.895636  | 0.96693  |
| Ube2f_j4         | 1.11479     | 1.12063   | 0.00753626   | 0.968212  | 0.991026 |
| Rnpepl1_j4       | 0           | 0.109458  | 0            | 1         | 1        |
| Rnpepl1_j6       | 0.905523    | 0.90061   | 0            | 1         | 1        |
| Gpr35_j2         | 3.3742      | 3.22982   | 0            | 1         | 1        |
| Gpr35_j5         | 0           | 0.48084   | 0            | 1         | 1        |
| Atg4b_j1         | 9.97217     | 7.66674   | 0            | 1         | 1        |
| D2hgdh_j6        | 0.12086     | 0.0856614 | -0.496615    | 0.670561  | 1        |
| Zcchc2_j1        | 0.527427    | 0.34539   | -0.610745    | 0.0771979 | 0.336263 |
| Serpinb12_j1     | 0.105514    | 0.155404  | 0.558593     | 0.443338  | 1        |
| Slc35f5_j3       | 2.42225     | 2.19458   | 0            | 1         | 1        |
| Mgat5_j2         | 2.2447      | 1.73233   | 0            | 1         | 1        |
| R3hdm1_j14       | 2.70807     | 2.80729   | 0            | 1         | 1        |
| XLOC_000306      | 0.871804    | 1.05947   | 0.281263     | 0.213529  | 0.558716 |
| Faim3_j1         | 0.0646682   | 0.209462  | 1.69556      | 0.235368  | 0.58261  |
| Klhdc8a_j1       | 0.118855    | 0.246736  | 1.05377      | 0.141944  | 0.46851  |
| Adipor1_j2       | 12.6618     | 12.2743   | -0.0448416   | 0.761544  | 0.917949 |
| Tnni1_j1         | 0.14788     | 0.525186  | 1.82841      | 0.116761  | 0.42495  |
| Kif21b_j7        | 0.82183     | 0.677927  | 0            | 1         | 1        |



|                  |             |           |              |           |           |
|------------------|-------------|-----------|--------------|-----------|-----------|
| XLOC_000358      | 0.177397    | 0.259847  | 0.550679     | 0.559881  | 0.820916  |
| XLOC_000358      | 0.231758    | 0.182356  | -0.34586     | 0.575547  | 0.828379  |
| Kcnt2_j6         | 0.268676    | 0.141572  | -0.924327    | 0.0624886 | 0.295796  |
| Glrx2            | 0.781732    | 0.849109  | 0.119276     | 0.692041  | 0.885987  |
| Tpr_j1           | 11.4986     | 12.7984   | 0.154503     | 0.192782  | 0.535072  |
| Ivns1abp_j3      | 0           | 0.100982  | 1.79769e+308 | 0.0107273 | 1         |
| Ivns1abp_j2      | 0.745289    | 0.592856  | -0.330119    | 0.297733  | 0.644364  |
| Glt25d2_j4       | 0.864365    | 3.20346   | 0            | 1         | 1         |
| Ncf2_j4          | 0.117556    | 0.302257  | 0            | 1         | 1         |
| Ncf2_j9          | 0.153555    | 0.178349  | 0            | 1         | 1         |
| Ncf2_j11         | 0.279165    | 0.319314  | 0            | 1         | 1         |
| Rgs8_j1          | 3.37907     | 1.67829   | 0            | 1         | 1         |
| Rgs8_j7          | 3.35931     | 5.11215   | 0            | 1         | 1         |
| Rnasel_j4        | 0.502737    | 1.47931   | 0            | 1         | 1         |
| XLOC_000387      | 0.0672649   | 0.0795235 | 0.241527     | 0.820949  | 1         |
| XLOC_000390      | 0.0346735   | 0.085727  | 0            | 1         | 1         |
| Angptl1          | 0.651699    | 0.674084  | 0.0487228    | 0.845267  | 0.951062  |
| BC026585_j5      | 0.430665    | 0.423689  | -0.0235613   | 0.971882  | 0.991962  |
| Sec16b_j3        | 0.0773313   | 0.0548171 | -0.496426    | 0.709937  | 1         |
| XLOC_000402      | 0.0670812   | 0.131984  | 0.976385     | 0.29096   | 1         |
| Rfwd2_j7         | 0.522651    | 0.628135  | 0.265227     | 0.659386  | 0.870718  |
| Rfwd2_j14        | 2.44126     | 3.02492   | 0.309271     | 0.319599  | 0.662893  |
| 4930523C07Rik_j2 | 0.019128    | 0.096853  | 2.34011      | 0.225028  | 1         |
| Ankrd45_j4       | 0           | 1.4071    | 0            | 1         | 1         |
| Ankrd45_j5       | 0           | 0.302376  | 0            | 1         | 1         |
| Vamp4_j4         | 0           | 0.472929  | 0            | 1         | 1         |
| Kifap3_j1        | 18.7583     | 29.1605   | 0            | 1         | 1         |
| Scyl3_j3         | 0.463115    | 0.301016  | 0            | 1         | 1         |
| Scyl3_j6         | 0.129103    | 0.0825778 | 0            | 1         | 1         |
| Slc19a2_j3       | 3.65516     | 3.71852   | 0.0247971    | 0.89428   | 0.96654   |
| Ildr2_j1         | 0.031782    | 0.121438  | 1.93394      | 0.377019  | 1         |
| Tada1_j2         | 0.167452    | 0.556911  | 0            | 1         | 1         |
| Rgs5_j1          | 18.4173     | 19.3634   | 0            | 1         | 1         |
| 1700084C01Rik_j1 | 0.143327    | 0.147731  | 0.0436615    | 0.962484  | 0.989507  |
| Nr1i3_j1         | 0.353515    | 0.185312  | 0            | 1         | 1         |
| Pfdn2_j1         | 36.046      | 42.0324   | 0            | 1         | 1         |
| Usf1_j6          | 0.305258    | 0.333161  | 0            | 1         | 1         |
| Copa_j2          | 30.115      | 31.13     | 0            | 1         | 1         |
| Igsf9_j4         | 0           | 0.0867561 | 1.79769e+308 | 0.0326047 | 1         |
| Igsf9_j9         | 0.112091    | 0.111817  | -0.00352353  | 0.998004  | 1         |
| Igsf9_j11        | 0.140281    | 0.138883  | -0.0144532   | 0.992096  | 0.997582  |
| EG545391_j1      | 0.185689    | 0.173216  | -0.100318    | 0.923315  | 0.97612   |
| Pppde1_j4        | 0.000179713 | 0.118082  | 0            | 1         | 1         |
| Cnst_j6          | 0.5864      | 2.69591   | 2.20081      | 1.81E-05  | 0.0005115 |
| Cdc42bpa_j3      | 3.90757     | 2.83814   | 0            | 1         | 1         |
| Cdc42bpa_j5      | 0           | 0.682625  | 0            | 1         | 1         |
| Lin9             | 0.13517     | 0.306591  | 1.18154      | 0.123739  | 0.438193  |

|                  |           |           |              |           |           |
|------------------|-----------|-----------|--------------|-----------|-----------|
| Tmem63a_j3       | 0.810721  | 1.43309   | 0            | 1         | 1         |
| XLOC_000504      | 0.0793227 | 0.171465  | 1.11211      | 0.425611  | 0.740579  |
| XLOC_000509      | 0.30859   | 0.183766  | -0.74782     | 0.437127  | 0.747501  |
| Susd4_j1         | 10.0987   | 6.50089   | 0            | 1         | 1         |
| Susd4_j6         | 1.11433   | 1.08543   | 0            | 1         | 1         |
| XLOC_000516      | 0.0895944 | 0.0674559 | -0.409464    | 0.739624  | 1         |
| Esrrg_j1         | 1.68887   | 1.287     | 0            | 1         | 1         |
| Angel2           | 0.0729607 | 0.0675538 | -0.111083    | 0.936564  | 1         |
| AK021325_j2      | 0.268707  | 0.174793  | -0.620385    | 0.208151  | 0.552263  |
| Ints7            | 0.110986  | 0.378249  | 1.76895      | 0.0003074 | 0.0054542 |
| Lamb3            | 0         | 0.408719  | 1.79769e+308 | 9.29E-08  | 5.04E-06  |
| Plxna2_j3        | 0.618546  | 0.999422  | 0            | 1         | 1         |
| Cd34_j2          | 12.9733   | 9.94517   | -0.383477    | 0.0029965 | 0.0343962 |
| A330023F24Rik_j3 | 0.0978643 | 0.156108  | 0.673686     | 0.138126  | 1         |
| Xkr4_j2          | 0.158042  | 0.1862    | 0.236545     | 0.762965  | 0.918329  |
| Xkr4_j3          | 0.12812   | 0.101069  | -0.342164    | 0.825824  | 1         |
| XLOC_000554      | 0.148744  | 0.361699  | 1.28196      | 0.191471  | 0.533645  |
| Sox17_j7         | 0.16805   | 0.322284  | 0.939439     | 0.0714825 | 0.321458  |
| XLOC_000562      | 0.0485464 | 0.261194  | 2.42769      | 0.0156236 | 0.118199  |
| Sntg1_j5         | 0.0038674 | 0.341942  | 6.46624      | 0.408913  | 0.729112  |
| Z610203C22Rik_j2 | 0.0419352 | 0.0579341 | 0.466252     | 0.71822   | 1         |
| Slco5a1_j2       | 0.933835  | 0.614896  | -0.602825    | 0.0173134 | 0.127423  |
| Slco5a1_j6       | 0.544383  | 0.105136  | -2.37237     | 0.0076983 | 0.0707122 |
| Tram1_j1         | 2.95903   | 3.56968   | 0            | 1         | 1         |
| Lactb2_j2        | 8.5771    | 8.11835   | -0.0793037   | 0.626322  | 0.854124  |
| Trpa1_j4         | 1.47917   | 2.11834   | 0.518148     | 0.011355  | 0.0942007 |
| Tram2_j4         | 0         | 0.144995  | 1.79769e+308 | 0.0646528 | 1         |
| Rims1_j6         | 0.517884  | 0.803689  | 0            | 1         | 1         |
| Rims1_j8         | 1.60292   | 1.52929   | -0.0678377   | 0.868406  | 0.95827   |
| Rims1_j9         | 0.150788  | 0.419526  | 1.47624      | 0.0295003 | 0.183685  |
| Rims1_j25        | 0.817607  | 0.653841  | -0.322468    | 0.592871  | 0.837903  |
| Ogfrl1_j4        | 0.978573  | 5.04755   | 0            | 1         | 1         |
| Smap1_j1         | 0.314037  | 0.656812  | 0            | 1         | 1         |
| Smap1            | 14.8205   | 15.3778   | 0            | 1         | 1         |
| Fam135a_j7       | 0.190719  | 0.341773  | 0.841591     | 0.0358463 | 0.208909  |
| Fam135a          | 1.20137   | 1.19108   | -0.0124087   | 0.952017  | 0.986165  |
| Col19a1_j7       | 0.180452  | 0.16458   | -0.132828    | 0.815195  | 0.939823  |
| Bai3_j9          | 0.246078  | 0.555977  | 0            | 1         | 1         |
| Phf3_j6          | 0.905331  | 1.17406   | 0            | 1         | 1         |
| Prim2_j1         | 0.20675   | 0.138821  | -0.574665    | 0.503258  | 0.78696   |
| Zfp451_j1        | 0.283371  | 0.918519  | 0            | 1         | 1         |
| Ccdc115_j2       | 1.33623   | 1.12881   | 0            | 1         | 1         |
| Lman2l_j1        | 0.244312  | 0.353309  | 0.532207     | 0.142206  | 0.46882   |
| Ankrd23_j5       | 0.221226  | 0.299456  | 0.436818     | 0.406748  | 0.727764  |
| Sema4c_j3        | 0         | 0.301017  | 0            | 1         | 1         |
| Sema4c_j6        | 0.584528  | 0.792586  | 0            | 1         | 1         |
| Tmem131_j5       | 2.22855   | 2.29641   | 0            | 1         | 1         |

|             |            |           |              |           |          |
|-------------|------------|-----------|--------------|-----------|----------|
| Tsga10_j3   | 0          | 0.0850905 | 0            | 1         | 1        |
| Tsga10_j6   | 0.382859   | 0.38831   | 0            | 1         | 1        |
| Rnf149_j3   | 1.14296    | 1.27987   | 0.163226     | 0.596483  | 0.839476 |
| XLOC_000653 | 0.158074   | 0.353499  | 1.16111      | 0.247691  | 0.595075 |
| Tgfbra1_j4  | 0          | 0.362135  | 0            | 1         | 1        |
| Slc39a10_j2 | 0          | 0.215172  | 0            | 1         | 1        |
| Obfc2a      | 0.205013   | 0.355418  | 0.793804     | 0.237274  | 0.584093 |
| Inpp1_j3    | 0.415338   | 0.12463   | 0            | 1         | 1        |
| Pms1_j5     | 0.435718   | 0.436463  | 0.00246604   | 0.996969  | 0.999154 |
| Hecw2_j2    | 0.87244    | 0.764801  | 0            | 1         | 1        |
| Pgap1_j1    | 0          | 0.139768  | 1.79769e+308 | 1.27E-05  | 1        |
| Ankrd44_j1  | 1.46168    | 1.74863   | 0.258591     | 0.195613  | 0.538158 |
| Sf3b1_j2    | 3.42573    | 3.92123   | 0            | 1         | 1        |
| Hspd1_j1    | 46.1167    | 49.9329   | 0.1147       | 0.218523  | 0.564931 |
| Als2_j5     | 0.0758722  | 0.0219299 | -1.79067     | 0.116625  | 1        |
| Sumo1_j1    | 0.9069     | 1.06992   | 0.238485     | 0.309182  | 0.653897 |
| Ica1_j4     | 0.432992   | 0.52287   | 0.272114     | 0.473519  | 0.770096 |
| Wdr12_j2    | 0          | 0.0803719 | 1.79769e+308 | 0.0216741 | 1        |
| Wdr12_j4    | 0.0930504  | 0.0721702 | -0.36661     | 0.638208  | 1        |
| Wdr12_j5    | 1.14279    | 1.03967   | -0.136438    | 0.504728  | 0.787836 |
| Ino80d_j2   | 0.0533895  | 0.105183  | 0.97827      | 0.344765  | 1        |
| Ino80d_j3   | 0.138823   | 0.171515  | 0.305082     | 0.679098  | 0.879469 |
| Ino80d_j4   | 0          | 0.175834  | 1.79769e+308 | 0.0341301 | 0.202351 |
| Ndufs1_j1   | 0          | 0.060979  | 0            | 1         | 1        |
| Idh1_j2     | 4.30096    | 14.299    | 1.73318      | 0         | 0        |
| Acadl_j1    | 2.84236    | 3.46153   | 0.28432      | 0.224376  | 0.571512 |
| Bard1_j2    | 0.00677904 | 0.163174  | 4.58919      | 0.238445  | 0.585379 |
| Tns1_j11    | 33.0784    | 27.7253   | 0            | 1         | 1        |
| Tns1_j12    | 4.96797    | 4.43518   | 0            | 1         | 1        |
| Usp37_j1    | 0.16397    | 0.205898  | 0            | 1         | 1        |
| Usp37_j2    | 0.363194   | 0.57122   | 0            | 1         | 1        |
| Rnf25_j6    | 3.9134     | 4.67971   | 0            | 1         | 1        |
| Atg9a_j1    | 0.440018   | 2.38658   | 0            | 1         | 1        |
| Atg9a_j2    | 32.9985    | 29.3085   | 0            | 1         | 1        |
| Ptprn_j9    | 0          | 0.792497  | 0            | 1         | 1        |
| Epha4_j1    | 0          | 0.0772923 | 1.79769e+308 | 0.0107991 | 1        |
| Dock10_j5   | 0.949637   | 0.98259   | 0            | 1         | 1        |
| Dock10_j6   | 0.294897   | 0.407807  | 0            | 1         | 1        |
| Col4a4_j3   | 0.0638378  | 0.240084  | 1.91106      | 0.296398  | 0.643089 |
| Trip12_j8   | 0.324654   | 0.440079  | 0            | 1         | 1        |
| Trip12_j9   | 0.0570883  | 0.33094   | 0            | 1         | 1        |
| Csprs_j1    | 0.370625   | 0.544404  | 0.554719     | 0.521515  | 0.798244 |
| Sp110_j1    | 0.138481   | 0.28147   | 1.02329      | 0.193363  | 0.535696 |
| Sp110_j6    | 0.0416878  | 0.127988  | 1.61831      | 0.409404  | 1        |
| Ecel1_j5    | 0.965653   | 2.9241    | 1.59842      | 2.32E-13  | 3.67E-11 |
| Ecel1_j7    | 0.18234    | 0.26661   | 0.548101     | 0.242642  | 0.590089 |
| Dnajb3      | 1.22653    | 1.23103   | 0.00527936   | 0.985493  | 0.995689 |

|              |            |           |              |           |           |
|--------------|------------|-----------|--------------|-----------|-----------|
| XLOC_000798  | 0.0367857  | 0.210793  | 2.51861      | 0.0689958 | 0.314885  |
| Col6a3_j4    | 0.00287928 | 0.102901  | 5.1594       | 0.004331  | 1         |
| Hdac4_j9     | 0.00282281 | 1.14021   | 0            | 1         | 1         |
| Hdac4_j10    | 0.0701426  | 0.213624  | 0            | 1         | 1         |
| Myeov2_j1    | 57.758     | 54.7756   | -0.0764865   | 0.611712  | 0.84711   |
| Otos_j1      | 0.618727   | 0.610765  | -0.0186864   | 0.971828  | 0.991962  |
| Kif1a_j8     | 7.60836    | 6.69393   | 0            | 1         | 1         |
| Kif1a_j9     | 1.78398    | 11.9817   | 0            | 1         | 1         |
| XLOC_000813  | 0.381849   | 0.225788  | -0.758034    | 0.460042  | 0.76171   |
| Pask_j2      | 0.157484   | 0.223884  | 0.507546     | 0.287016  | 0.635532  |
| Ppip5k2_j2   | 6.77973    | 6.33452   | 0            | 1         | 1         |
| Ppip5k2_j3   | 1.44224    | 1.16258   | 0            | 1         | 1         |
| Ppip5k2_j4   | 3.76591    | 3.29009   | 0            | 1         | 1         |
| Pign_j1      | 0          | 0.0961352 | 1.79769e+308 | 0.0014264 | 1         |
| Cdh19_j4     | 0          | 0.289068  | 1.79769e+308 | 9.28E-05  | 0.0020149 |
| Inhbb_j2     | 0.294029   | 0.0521885 | 0            | 1         | 1         |
| Epb4.1l5_j1  | 0          | 0.241821  | 1.79769e+308 | 5.92E-05  | 0.0013718 |
| Epb4.1l5_j7  | 0.128006   | 0.182703  | 0.513288     | 0.36504   | 0.698904  |
| Epb4.1l5_j12 | 0.375805   | 0.277846  | -0.435697    | 0.437886  | 0.747849  |
| Tmem177_j2   | 0.130245   | 0.311514  | 1.25807      | 0.0340883 | 0.202226  |
| Dbi_j5       | 31.7117    | 5.99319   | -2.40362     | 2.22E-14  | 4.05E-12  |
| Insig2_j1    | 6.51569    | 4.22297   | 0            | 1         | 1         |
| Ddx18_j7     | 0          | 0.16052   | 1.79769e+308 | 0.100532  | 0.392504  |
| Tmem163      | 5.68253    | 4.41539   | 0            | 1         | 1         |
| Lct_j1       | 0.488883   | 0.291714  | -0.744935    | 1         | 1         |
| Gm15675_j1   | 0.218754   | 0.128733  | -0.764923    | 0.266738  | 0.615721  |
| Pfkfb2_j4    | 0.446023   | 0.396806  | 0            | 1         | 1         |
| Srgap2_j1    | 0.471162   | 0.299426  | 0            | 1         | 1         |
| Tmcc2        | 6.47864    | 9.70726   | 0            | 1         | 1         |
| Cntn2_j2     | 0          | 0.554869  | 0            | 1         | 1         |
| Nfasc_j2     | 0.0148096  | 0.0485231 | 0            | 1         | 1         |
| Mdm4_j8      | 4.74875    | 5.24045   | 0            | 1         | 1         |
| Sox13_j1     | 0          | 0.0642407 | 0            | 1         | 1         |
| Sox13_j2     | 0          | 0.422399  | 0            | 1         | 1         |
| Snrpe_j2     | 17.5818    | 17.6857   | 0.00850096   | 0.972338  | 0.991962  |
| Adora1_j4    | 0.472938   | 0.818837  | 0            | 1         | 1         |
| Tmem183a_j2  | 0.338001   | 0         | 0            | 1         | 1         |
| Tmem183a_j3  | 2.55699    | 2.05031   | 0            | 1         | 1         |
| Ppp1r12b_j1  | 1.88308    | 2.68018   | 0            | 1         | 1         |
| Shisa4_j1    | 0.302008   | 1.31947   | 0            | 1         | 1         |
| Nav1_j1      | 2.42964    | 2.90537   | 0            | 1         | 1         |
| Igfn1_j7     | 0          | 0.248247  | 1.79769e+308 | 1.65E-05  | 0.0004736 |
| Camsap1l1_j5 | 16.3669    | 16.2615   | 0            | 1         | 1         |
| Cfhrb_4/2_j1 | 0.196307   | 0.423478  | 1.10918      | 0.291543  | 0.638573  |
| Trove2_j2    | 0.00790436 | 0.802317  | 0            | 1         | 1         |
| Rgs18_j1     | 0.0824216  | 0.0954035 | 0.21102      | 0.86654   | 1         |
| Hmcn1_j8     | 0.0355728  | 0.14202   | 1.99725      | 0.0199743 | 1         |

|                       |             |             |              |           |           |
|-----------------------|-------------|-------------|--------------|-----------|-----------|
| XLOC_000934           | 0.154028    | 0.191551    | 0.314536     | 0.539156  | 0.808383  |
| XLOC_000934           | 2.33E-06    | 0.20906     | 16.4558      | 0.995377  | 0.998726  |
| Rnf2_j2               | 0.923225    | 1.65655     | 0.843431     | 0.0016453 | 0.02134   |
| ENSMUSG00000073540_j1 | 0.0488031   | 0.16141     | 0            | 1         | 1         |
| ENSMUSG00000073540_j3 | 0.267625    | 0.157872    | 0            | 1         | 1         |
| Rgl1_j5               | 1.32078     | 1.43906     | 0            | 1         | 1         |
| Smg7_j1               | 1.36013     | 0.000653529 | 0            | 1         | 1         |
| Lamc2_j6              | 9.68E-05    | 0.270769    | 11.4491      | 0.813094  | 0.938893  |
| Lamc1_j1              | 5.50788     | 6.15422     | 0            | 1         | 1         |
| Npl_j1                | 0           | 0.15754     | 1.79769e+308 | 0.0574325 | 0.280785  |
| Npl_j2                | 0.12949     | 0.103885    | -0.317857    | 0.794255  | 1         |
| Cacna1e_j1            | 0.768734    | 0.525492    | -0.548815    | 0.0133465 | 0.105957  |
| Cep350_j1             | 0.0661049   | 0.000135394 | 0            | 1         | 1         |
| Fam163a_j1            | 0.0388604   | 0.0911547   | 1.23002      | 0.201157  | 1         |
| Soat1_j1              | 0           | 0.478458    | 1.79769e+308 | 1.53E-10  | 1.49E-08  |
| Fam20b_j4             | 0           | 0.0497552   | 0            | 1         | 1         |
| Ralgps2_j1            | 0.335187    | 0.415851    | 0            | 1         | 1         |
| Ralgps2_j2            | 0           | 0.10828     | 0            | 1         | 1         |
| Ralgps2_j3            | 0           | 0.278707    | 0            | 1         | 1         |
| Rasal2_j3             | 0           | 0.177847    | 1.79769e+308 | 5.50E-06  | 0.0001838 |
| Fam5b_j1              | 0.0630853   | 0.0857011   | 0            | 1         | 1         |
| Rabgap1l_j4           | 2.87305     | 3.15412     | 0.134653     | 0.644217  | 0.862839  |
| Zbtb37_j3             | 0.135315    | 0.140684    | 0.0561388    | 0.929649  | 1         |
| Klhl20_j1             | 1.48044     | 1.81287     | 0.292245     | 0.200905  | 0.544315  |
| AK181631_j1           | 9.959       | 12.6215     | 0.341816     | 0.013825  | 0.108518  |
| AI848100_j1           | 1.59841     | 1.59976     | 0            | 1         | 1         |
| Dnm3_j2               | 6.61551     | 6.58375     | 0            | 1         | 1         |
| Prrc2c_j1             | 16.1416     | 18.7067     | 0            | 1         | 1         |
| Prrc2c_j3             | 3.32487     | 3.38022     | 0            | 1         | 1         |
| Prrx1_j1              | 0.217484    | 0.207139    | -0.0703139   | 0.89664   | 0.967057  |
| BC055324_j1           | 0           | 0.0930765   | 1.79769e+308 | 0.0665394 | 1         |
| Atp1b1_j6             | 285.885     | 344.724     | 0            | 1         | 1         |
| Sft2d2_j1             | 0           | 0.0709725   | 1.79769e+308 | 0.0113508 | 1         |
| Mpzl1_j1              | 0.140272    | 0.312471    | 0            | 1         | 1         |
| Pou2f1_j5             | 0.158214    | 0.234933    | 0.570369     | 0.0827793 | 0.350783  |
| Pou2f1_j4             | 0.0239702   | 0.0952307   | 1.99019      | 0.0031094 | 1         |
| Dusp27_j1             | 0.178522    | 0.234248    | 0.391933     | 0.394028  | 0.719796  |
| Pogk_j1               | 1.03748     | 1.24901     | 0            | 1         | 1         |
| BC056189              | 0.20983     | 0.230921    | 0            | 1         | 1         |
| Mgst3_j1              | 33.6718     | 27.8562     | -0.273544    | 0.135298  | 0.457619  |
| Pbx1_j6               | 1.60353     | 2.34811     | 0            | 1         | 1         |
| Rgs4_j2               | 0           | 1.97465     | 0            | 1         | 1         |
| Ddr2_j1               | 0           | 0.0667027   | 0            | 1         | 1         |
| Uhmk1_j4              | 8.98782     | 8.44051     | 0            | 1         | 1         |
| Nos1ap_j1             | 1.7732      | 2.34899     | 0.405683     | 0.0115599 | 0.0954105 |
| Atf6_j2               | 0.000150859 | 0.245263    | 0            | 1         | 1         |
| Ndufs2_j3             | 19.6982     | 22.7365     | 0            | 1         | 1         |

|                  |           |           |               |           |           |
|------------------|-----------|-----------|---------------|-----------|-----------|
| Ndufs2_j4        | 0.0666538 | 0.166597  | 0             | 1         | 1         |
| Usp21_j4         | 0.560402  | 0.405292  | -0.467499     | 0.198751  | 0.541907  |
| Ly9_j7           | 0         | 0.108166  | 1.79769e+308  | 0.0304235 | 1         |
| Pea15a_j1        | 54.0722   | 67.7474   | 0             | 1         | 1         |
| Slamf8           | 0.13146   | 0.119168  | -0.141626     | 0.857275  | 1         |
| Al607873_j1      | 0.318539  | 0.657764  | 1.0461        | 0.0001608 | 0.0031991 |
| Rgs7_j7          | 1.14779   | 1.72328   | 0             | 1         | 1         |
| Pld5_j2          | 0         | 0.0908393 | 0             | 1         | 1         |
| XLOC_001066      | 0.0533922 | 0.148716  | 0             | 1         | 1         |
| Cep170_j10       | 0.346738  | 0.425644  | 0             | 1         | 1         |
| Adss_j2          | 1.3846    | 2.85126   | 1.04213       | 0.0004157 | 0.0069821 |
| Hnrnpu_j4        | 8.71266   | 8.01157   | -0.121027     | 0.396451  | 0.721168  |
| Smyd3_j4         | 0         | 0.151376  | 1.79769e+308  | 0.0001429 | 1         |
| Smyd3_j8         | 0.403496  | 0.371553  | -0.118986     | 0.916374  | 0.973929  |
| Smyd3_j11        | 1.27354   | 1.9633    | 0.624438      | 0.360509  | 0.695458  |
| Ahctf1_j5        | 1.84222   | 2.85578   | 0.632437      | 5.53E-05  | 0.0013007 |
| H3f3a_j3         | 0         | 0.122778  | 1.79769e+308  | 0.156386  | 1         |
| XLOC_001087      | 0.0917382 | 0.187025  | 1.02764       | 0.047919  | 0.251648  |
| Lbr              | 2.13612   | 2.44447   | 0.194526      | 0.371824  | 0.704757  |
| Capn2_j3         | 0.17472   | 0.237704  | 0             | 1         | 1         |
| Capn2_j4         | 0.787955  | 1.27313   | 0             | 1         | 1         |
| Capn2_j10        | 0.58822   | 0.0465501 | 0             | 1         | 1         |
| Hlx_j1           | 0.560324  | 0.76806   | 0.454957      | 0.27205   | 0.620865  |
| Tgfb2_j1         | 8.64E-05  | 0.507109  | 12.5184       | 0.856304  | 0.954582  |
| Kctd3_j6         | 0.190512  | 0.254217  | 0.416178      | 0.558021  | 0.819821  |
| Smyd2_j2         | 7.62681   | 12.1116   | 0             | 1         | 1         |
| Rps6kc1_j5       | 3.93341   | 5.36388   | 0             | 1         | 1         |
| Mfsd7b_j4        | 1.18666   | 1.70664   | 0             | 1         | 1         |
| Tatdn3_j3        | 0.239788  | 0.19682   | -0.284885     | 0.563447  | 0.822584  |
| Atf3_j3          | 0         | 0.57823   | 0             | 1         | 1         |
| Nenf_j1          | 0         | 0.404018  | 0             | 1         | 1         |
| Nenf_j2          | 11.9848   | 14.1251   | 0             | 1         | 1         |
| Ppp2r5a_j2       | 0.0254124 | 0.131321  | 2.36949       | 0.0173917 | 1         |
| Rcor3_j1         | 1.08276   | 1.07437   | 0             | 1         | 1         |
| Rcor3_j2         | 0.0359806 | 0.199064  | 0             | 1         | 1         |
| Hhat_j10         | 0         | 0.133899  | 1.79769e+308  | 0.0347061 | 1         |
| AA408296_j2      | 3.82E-05  | 0.410731  | 13.3916       | 0.887819  | 0.964583  |
| XLOC_001132      | 0.0944237 | 0.180549  | 0.935172      | 0.391228  | 0.717886  |
| C030002c11rik_j2 | 0.0482655 | 0.134314  | 1.47654       | 0.313403  | 1         |
| CD46_j5          | 0.0380813 | 0.0846294 | 1.15208       | 0.503531  | 1         |
| Cr1l_j1          | 0.719214  | 1.30923   | 0.864228      | 0.123321  | 0.43723   |
| Cnksr3           | 0.387012  | 0.528378  | 0.449193      | 0.174897  | 0.513197  |
| Rgs17            | 7.49707   | 8.36554   | 0.158131      | 0.098     | 0.386863  |
| Rgs17_j1         | 0.439192  | 0         | -1.79769e+308 | 1.21E-17  | 3.20E-15  |
| Mtrf1l           | 0.364247  | 0.583759  | 0.680453      | 0.0242956 | 0.161131  |
| Mtrf1l_j3        | 0.141033  | 0.0765236 | -0.882058     | 0.205293  | 0.549685  |
| Fbxo5_j1         | 0.0529436 | 0.149461  | 1.49724       | 0.26215   | 1         |

|             |           |                 |            |           |           |
|-------------|-----------|-----------------|------------|-----------|-----------|
| Fbxo5       | 0.377988  | 0.314412        | -0.265684  | 0.539158  | 0.808383  |
| Fbxo5_j3    | 0.359719  | 0.218575        | -0.71874   | 0.364438  | 0.698412  |
| Rmnd1       | 0.100424  | 0.181266        | 0.852009   | 0.155242  | 0.488418  |
| Rmnd1_j5    | 0.134522  | 0.144161        | 0.0998431  | 0.845946  | 1         |
| Rmnd1_j16   | 0.347832  | 0.272837        | -0.350353  | 0.29269   | 0.639689  |
| Lrp11       | 0.734049  | 0.630513        | -0.219351  | 0.612301  | 0.847331  |
| Lrp11_j1    | 8.35538   | 5.9662          | -0.485893  | 0.0029978 | 0.0343965 |
| Katna1      | 4.78439   | 5.56627         | 0.218377   | 0.149668  | 0.479278  |
| Ppil4       | 4.6128    | 4.54342         | -0.0218648 | 0.867246  | 0.958063  |
| XLOC_002193 | 0.0757588 | 0.0612276       | -0.307232  | 0.740775  | 1         |
| XLOC_002193 | 0.109075  | 0.0598141       | -0.866768  | 0.474958  | 1         |
| XLOC_002194 | 0.18607   | 0.270578        | 0          | 1         | 1         |
| Shprh       | 0.283801  | 0.154642        | -0.87595   | 0.0226252 | 0.153531  |
| Shprh_j4    | 1.14833   | 1.21621         | 0.0828456  | 0.69094   | 0.885572  |
| Fbxo30      | 4.59672   | 4.84026         | 0.0744793  | 0.539616  | 0.808476  |
| Epm2a       | 3.44396   | 2.97036         | 0          | 1         | 1         |
| Epm2a_j2    | 5.96026   | 5.67079         | 0          | 1         | 1         |
| Plagl1_j2   | 0.534683  | 0.535316        | 0          | 1         | 1         |
| Plagl1      | 1.07382   | 0.42448         | 0          | 1         | 1         |
| Fuca2       | 24.3606   | 25.7748         | 0.0814155  | 0.416744  | 0.733896  |
| Adat2       | 1.31594   | 1.13857         | -0.208869  | 0.222427  | 0.569499  |
| Hivep2_j2   | 0.427805  | 0.150913        | -1.50324   | 5.07E-05  | 0.0012063 |
| Hivep2_j3   | 0.551156  | 0 -1.79769e+308 |            | 7.00E-26  | 2.24E-23  |
| Hivep2_j5   | 0.277382  | 0.073226        | -1.92145   | 0.0001695 | 0.0033407 |
| Nmbr        | 0.124054  | 0.286577        | 1.20795    | 0.050719  | 0.260788  |
| Cited2      | 3.76547   | 6.94949         | 0.884077   | 1.36E-08  | 9.34E-07  |
| Txlnb       | 0.145006  | 0.223164        | 0.621988   | 0.156234  | 0.489716  |
| Reps1_j2    | 1.82673   | 1.53004         | 0          | 1         | 1         |
| Reps1_j1    | 10.3388   | 10.4177         | 0          | 1         | 1         |
| Reps1_j4    | 4.18714   | 5.90659         | 0          | 1         | 1         |
| Nhsl1_j3    | 0.430705  | 0.302935        | -0.507691  | 0.0311924 | 0.190497  |
| Perp        | 1.4645    | 1.39083         | -0.0744599 | 0.776673  | 0.924506  |
| AK044491_j1 | 0.298668  | 0.197963        | -0.593314  | 0.0709748 | 0.320347  |
| Ifngr1      | 7.87803   | 7.975           | 0          | 1         | 1         |
| Ifngr1_j2   | 1.21823   | 0.967597        | 0          | 1         | 1         |
| Map3k5      | 2.97003   | 1.94657         | 0          | 1         | 1         |
| Mtap7_j2    | 1.31424   | 1.21906         | 0          | 1         | 1         |
| Mtap7_j6    | 3.0075    | 2.57373         | 0          | 1         | 1         |
| Gm6251      | 38.7073   | 43.6138         | 0          | 1         | 1         |
| Mtap7_j11   | 4.37557   | 5.83473         | 0          | 1         | 1         |
| Bclaf1_j1   | 1.00314   | 0.909066        | 0          | 1         | 1         |
| Bclaf1      | 4.02546   | 2.97244         | 0          | 1         | 1         |
| Ahi1        | 3.73317   | 3.61478         | -0.0464948 | 0.736515  | 0.90722   |
| Hbs1l_j4    | 0.0824489 | 0 -1.79769e+308 |            | 0.0284639 | 1         |
| Sgk1        | 0.984403  | 0.537013        | -0.874292  | 0.0086618 | 0.0770078 |
| Sgk1_j1     | 0.512777  | 0.107559        | -2.25321   | 0.0050055 | 0.0507725 |
| Sgk1        | 0.76883   | 0.834697        | 0.118588   | 0.742278  | 0.909898  |

|                  |             |                 |            |           |           |
|------------------|-------------|-----------------|------------|-----------|-----------|
| Sgk1             | 4.75119     | 3.56049         | -0.416216  | 0.0149033 | 0.11442   |
| Raet1a_j3        | 0.0810307   | 0.128845        | 0.669098   | 0.378319  | 1         |
| 1110021L09Rik_j2 | 1.07434     | 1.30466         | 0          | 1         | 1         |
| 1110021L09Rik    | 1.46604     | 1.04334         | 0          | 1         | 1         |
| Stx7             | 63.0209     | 68.435          | 0.118903   | 0.207592  | 0.55198   |
| Stx7_j1          | 3.17378     | 2.49723         | -0.345872  | 0.385165  | 0.713848  |
| Moxd1            | 0.633912    | 0.429284        | -0.562352  | 0.15944   | 0.493951  |
| Moxd1_j2         | 0.306104    | 0 -1.79769e+308 |            | 0.000397  | 0.0067309 |
| Ctgf_j1          | 0.218395    | 0.209932        | -0.0570174 | 0.927033  | 0.977441  |
| Med23            | 0.71425     | 1.00562         | 0.493584   | 0.052341  | 0.265624  |
| Med23            | 2.42981     | 1.66802         | -0.542712  | 0.0025336 | 0.0301523 |
| Epb4.1l2_j5      | 0.0871205   | 0 -1.79769e+308 |            | 0.0043077 | 1         |
| Arhgap18_j4      | 0.50262     | 0.342096        | -0.555064  | 0.234606  | 0.581996  |
| Arhgap18_j8      | 0.253457    | 0.232578        | -0.12403   | 0.769596  | 0.921491  |
| Arhgap18_j10     | 0.0744463   | 0 -1.79769e+308 |            | 0.0089124 | 1         |
| Arhgap18_j12     | 0.259515    | 0.303983        | 0.228173   | 0.725794  | 0.902577  |
| Ptprk_j9         | 0.264558    | 0.179615        | -0.558681  | 0.203338  | 0.547261  |
| Ptprk_j7         | 0.807151    | 0.153726        | -2.39248   | 3.67E-08  | 2.24E-06  |
| Ptprk_j13        | 0.000259805 | 0.188901        | 9.50599    | 0.450529  | 0.756158  |
| 6330407J23Rik    | 4.25353     | 3.40068         | 0          | 1         | 1         |
| 9330159F19Rik_j2 | 0.916364    | 0.96311         | 0          | 1         | 1         |
| Echdc1           | 0.684486    | 0.660122        | 0          | 1         | 1         |
| Hddc2            | 15.5473     | 14.5299         | -0.0976445 | 0.488555  | 0.779095  |
| Rsph4a           | 0.17376     | 0.0696395       | -1.31912   | 0.0144712 | 0.112074  |
| Col10a1          | 0.142552    | 0.10051         | -0.50416   | 0.60701   | 0.845186  |
| Hs3st5           | 3.08626     | 3.13843         | 0          | 1         | 1         |
| Hs3st5_j3        | 2.73215     | 2.48574         | 0          | 1         | 1         |
| Hdac2            | 14.0226     | 11.7518         | 0          | 1         | 1         |
| AK040320_j1      | 0.16998     | 0.103837        | -0.711045  | 0.416733  | 0.733896  |
| Lama4_j3         | 0.121957    | 0 -1.79769e+308 |            | 1.08E-05  | 1         |
| Lama4            | 1.27209     | 1.41495         | 0.153549   | 0.359499  | 0.694746  |
| Tube1            | 0.357741    | 0.369252        | 0.0456901  | 0.889751  | 0.964993  |
| Fyn              | 11.1236     | 12.3859         | 0          | 1         | 1         |
| Fyn_j3           | 0.379486    | 0               | 0          | 1         | 1         |
| Traf3ip2         | 2.32537     | 2.86116         | 0.299141   | 0.056644  | 0.278415  |
| Rev3l_j1         | 0.739892    | 0.529471        | 0          | 1         | 1         |
| AK166420         | 0.29568     | 0.26128         | -0.17844   | 0.563281  | 0.822514  |
| Cdk19            | 3.4365      | 3.07832         | 0          | 1         | 1         |
| 9030224M15Rik    | 0.311763    | 0.408623        | 0.390321   | 0.340043  | 0.680124  |
| 9030224M15Rik_j2 | 0.156041    | 0.0133426       | -3.54781   | 0.431388  | 0.743572  |
| Wasf1_j1         | 7.43898     | 6.83831         | 0          | 1         | 1         |
| Wasf1_j3         | 13.1076     | 13.6077         | 0          | 1         | 1         |
| Zbtb24           | 1.03982     | 0.804478        | -0.370214  | 0.177507  | 0.516863  |
| Zbtb24           | 1.9758      | 1.90134         | -0.055418  | 0.775087  | 0.923761  |
| Cd164            | 0.764571    | 0.595291        | -0.361057  | 0.257878  | 0.606586  |
| Cd164_j1         | 23.3394     | 20.0775         | -0.217193  | 0.0754385 | 0.331473  |
| Cd164_j3         | 0.25251     | 0 -1.79769e+308 |            | 0.0021651 | 0.0265613 |



|             |           |                 |            |           |           |
|-------------|-----------|-----------------|------------|-----------|-----------|
| Sesn1       | 8.70502   | 6.83276         | 0          | 1         | 1         |
| Snx3        | 48.0661   | 48.8736         | 0.0240351  | 0.805889  | 0.935848  |
| Ostm1       | 14.8737   | 10.3731         | 0          | 1         | 1         |
| Sec63       | 6.1415    | 6.38054         | 0.0550863  | 0.664458  | 0.872968  |
| Scml4       | 0.398261  | 0.351535        | -0.180046  | 0.597307  | 0.84027   |
| Scml4       | 0.0576652 | 0.0990191       | 0.780005   | 0.344862  | 1         |
| Pdss2       | 5.35804   | 5.22604         | -0.035985  | 0.800616  | 0.933554  |
| Bend3       | 0.973578  | 0.358803        | 0          | 1         | 1         |
| Cd24a_j2    | 0.743573  | 0 -1.79769e+308 |            | 2.58E-08  | 1.65E-06  |
| XLOC_002275 | 0.0662782 | 0.0585968       | -0.177714  | 0.868938  | 1         |
| Rtn4ip1_j2  | 0.116058  | 0.0133977       | -3.11479   | 0.0646896 | 1         |
| Atg5        | 16.3298   | 15.7882         | -0.0486681 | 0.653922  | 0.867586  |
| Prep_j1     | 5.72845   | 6.44029         | 0          | 1         | 1         |
| Prep        | 16.1947   | 17.3521         | 0          | 1         | 1         |
| Popdc3      | 3.73311   | 3.44544         | 0          | 1         | 1         |
| Bves        | 4.81401   | 4.64515         | 0          | 1         | 1         |
| Bves_j1     | 3.15641   | 2.39594         | 0          | 1         | 1         |
| Hace1       | 6.5129    | 6.08722         | -0.0975159 | 0.459478  | 0.761406  |
| Ascc3_j1    | 0.260158  | 0.112126        | -1.21427   | 0.0106143 | 0.0893926 |
| Ascc3       | 2.61934   | 3.36283         | 0.360475   | 0.0021421 | 0.0263255 |
| Lilrb4_j2   | 0.0648017 | 0.102381        | 0.659841   | 0.464525  | 1         |
| Vgll2       | 0.106447  | 3.75E-05        | -11.4702   | 0.991125  | 1         |
| Dcbl1       | 8.27851   | 8.07439         | -0.0360187 | 0.760317  | 0.917459  |
| Nus1        | 14.4172   | 13.5156         | 0          | 1         | 1         |
| Slc35f1     | 2.05523   | 1.52445         | -0.431011  | 0.0098184 | 0.0845751 |
| Slc35f1_j1  | 3.68131   | 2.239           | -0.717366  | 0.0002759 | 0.0049915 |
| Pln         | 1.16235   | 0.674467        | 0          | 1         | 1         |
| Asf1a       | 2.02702   | 1.90679         | -0.0882085 | 0.503563  | 0.787092  |
| Msl3l2      | 0.777318  | 0.54524         | -0.511614  | 0.191201  | 0.533347  |
| Gja1        | 5.49418   | 4.70199         | 0          | 1         | 1         |
| Hsf2        | 12.8357   | 12.1895         | -0.0745229 | 0.509424  | 0.790813  |
| Fabp7       | 226.347   | 211.53          | 0          | 1         | 1         |
| Gcc2        | 8.17155   | 6.72793         | -0.280447  | 0.0050735 | 0.0512702 |
| Lims1_j1    | 10.0154   | 8.13879         | 0          | 1         | 1         |
| Lims1       | 0.173663  | 0.0795705       | 0          | 1         | 1         |
| Lims1       | 14.1156   | 13.3247         | 0          | 1         | 1         |
| Ranbp2      | 1.64828   | 1.11331         | 0          | 1         | 1         |
| Ranbp2_j3   | 13.9107   | 14.238          | 0          | 1         | 1         |
| Ccdc138_j1  | 0.274045  | 0.428862        | 0.646098   | 0.409173  | 0.72947   |
| Ccdc138     | 0.110475  | 0.348804        | 1.65869    | 0.0110808 | 0.0924583 |
| Ccdc138_j6  | 0.386937  | 0.131149        | -1.56089   | 0.0171714 | 0.126645  |
| Ccdc138_j5  | 0.134119  | 0.169955        | 0.34164    | 0.63868   | 0.860184  |
| Sh3rf3      | 0.280419  | 0.131734        | -1.08995   | 0.0073813 | 0.0685106 |
| Sh3rf3_j5   | 0.385071  | 0.264997        | -0.539148  | 0.15753   | 0.491628  |
| P4ha1       | 1.21847   | 1.66861         | 0          | 1         | 1         |
| P4ha1       | 1.32972   | 1.57971         | 0          | 1         | 1         |
| Cbara1_j4   | 37.9297   | 36.4058         | -0.0591581 | 0.549489  | 0.814804  |

|                  |           |                 |            |           |           |
|------------------|-----------|-----------------|------------|-----------|-----------|
| Dnajb12          | 7.18254   | 7.4975          | 0          | 1         | 1         |
| Ascc1            | 11.2446   | 11.7584         | 0.0644624  | 0.632156  | 0.856985  |
| Spock2           | 72.215    | 52.6366         | 0          | 1         | 1         |
| Spock2_j1        | 0.226679  | 0.16067         | 0          | 1         | 1         |
| Psap             | 576.256   | 640.96          | 0.153526   | 0.127703  | 0.445344  |
| Psap_j1          | 65.0828   | 25.1653         | -1.37084   | 0         | 0         |
| 4632428N05Rik    | 0.312033  | 1.18395         | 1.92384    | 1.62E-14  | 3.01E-12  |
| 4632428N05Rik_j2 | 0.0787971 | 0.0739484       | -0.0916235 | 0.907331  | 1         |
| 4632428N05Rik    | 0.243112  | 0.0877644       | -1.46991   | 0.0217533 | 0.14933   |
| Pcbd1            | 30.3068   | 34.3657         | 0.181328   | 0.0949616 | 0.38026   |
| Lrrc20_j6        | 0.656026  | 0               | 0          | 1         | 1         |
| Ppa1             | 41.658    | 46.0328         | 0          | 1         | 1         |
| Sar1a            | 44.5602   | 46.6674         | 0.0666589  | 0.452165  | 0.757323  |
| Sar1a_j1         | 4.30661   | 2.433           | -0.823818  | 0.0525836 | 0.266364  |
| Tysnd1           | 7.03077   | 7.18903         | 0.0321151  | 0.812808  | 0.938836  |
| Aifm2            | 0.305656  | 0.279735        | -0.127849  | 0.670493  | 0.875351  |
| Ass1             | 55.045    | 53.3717         | -0.0445378 | 0.623624  | 0.853007  |
| Slc25a16         | 6.9757    | 5.66485         | 0          | 1         | 1         |
| Dna2_j5          | 0.0594868 | 0.0396407       | -0.585588  | 0.707564  | 1         |
| Herc4            | 3.31742   | 3.46917         | 0          | 1         | 1         |
| Herc4_j2         | 0.788723  | 0.642026        | 0          | 1         | 1         |
| Herc4_j4         | 3.19716   | 4.76928         | 0          | 1         | 1         |
| Dnajc12          | 3.48595   | 3.06006         | -0.187993  | 0.506624  | 0.789059  |
| Dnajc12          | 7.97846   | 8.65681         | 0.117724   | 0.44418   | 0.752041  |
| Jmjd1c_j3        | 2.20291   | 1.9553          | -0.172022  | 0.218735  | 0.565027  |
| Jmjd1c_j7        | 0.077491  | 0 -1.79769e+308 |            | 4.38E-05  | 1         |
| Jmjd1c_j8        | 0.259906  | 0.222713        | -0.222806  | 0.523277  | 0.799177  |
| Egr2             | 0.683223  | 0.942876        | 0.464711   | 0.0849212 | 0.355652  |
| Rtkn2_j1         | 0.11478   | 0.0761662       | -0.591649  | 0.562255  | 1         |
| Rtkn2_j5         | 0.113534  | 0 -1.79769e+308 |            | 0.0078631 | 1         |
| Rhobtb1          | 0.547831  | 0.645388        | 0.236437   | 0.384278  | 0.713243  |
| Rhobtb1_j4       | 0.407529  | 0.0977529       | -2.05969   | 0.0144567 | 0.111997  |
| Rhobtb1_j5       | 0.309532  | 0.15073         | -1.03813   | 0.16327   | 0.498589  |
| Ank3_j2          | 2.41789   | 2.1151          | -0.193021  | 0.120266  | 0.431836  |
| Ank3_j1          | 4.12432   | 4.67533         | 0.180911   | 0.080379  | 0.344849  |
| Ank3_j13         | 10.2211   | 14.6969         | 0.52397    | 1.95E-05  | 0.0005429 |
| Ccdc6            | 7.24886   | 5.9665          | 0          | 1         | 1         |
| AK009351_j1      | 0.692023  | 0.371548        | -0.897272  | 0.194483  | 0.536757  |
| Slc16a9          | 1.16387   | 0.699068        | 0          | 1         | 1         |
| Fam13c_j1        | 1.00984   | 0.965294        | 0          | 1         | 1         |
| Fam13c_j2        | 1.13869   | 1.10627         | 0          | 1         | 1         |
| lpmk             | 1.17166   | 1.17977         | 0          | 1         | 1         |
| lpmk             | 2.44834   | 1.36296         | 0          | 1         | 1         |
| Zwint            | 317.228   | 344.637         | 0.119555   | 0.188638  | 0.530235  |
| Gm5778           | 3.59239   | 2.59799         | -0.467547  | 0.0488182 | 0.254579  |
| Gnaz_j1          | 2.32285   | 2.02292         | 0          | 1         | 1         |
| Gnaz             | 12.2595   | 11.291          | 0          | 1         | 1         |

|                  |           |                 |            |           |           |
|------------------|-----------|-----------------|------------|-----------|-----------|
| Gnaz_j5          | 8.90116   | 11.3675         | 0          | 1         | 1         |
| Rab36_j1         | 0.10829   | 0.248435        | 0          | 1         | 1         |
| Rab36            | 1.55236   | 0.961389        | 0          | 1         | 1         |
| Rab36_j5         | 0.237268  | 0.434111        | 0          | 1         | 1         |
| Bcr              | 7.1229    | 5.80166         | 0          | 1         | 1         |
| Bcr_j1           | 6.88652   | 6.51047         | 0          | 1         | 1         |
| Bcr              | 5.0654    | 4.82038         | 0          | 1         | 1         |
| Specc1l          | 8.35314   | 4.98385         | 0          | 1         | 1         |
| Adora2a          | 1.21098   | 0.629954        | -0.942853  | 0.0042385 | 0.0447442 |
| Upb1             | 0.355259  | 0.124196        | -1.51626   | 0.0435429 | 0.237046  |
| Upb1_j2          | 1.26986   | 0.827871        | -0.617186  | 0.134408  | 0.456305  |
| Snrpd3           | 11.1437   | 10.806          | 0          | 1         | 1         |
| Snrpd3_j1        | 6.04365   | 6.7166          | 0          | 1         | 1         |
| Ggt5             | 0.666532  | 1.28902         | 0.951525   | 1.04E-10  | 1.06E-08  |
| Chchd10_j1       | 57.1469   | 34.423          | -0.731301  | 5.58E-13  | 8.27E-11  |
| Zfp280b_j1       | 0.0735197 | 0.384637        | 0          | 1         | 1         |
| Zfp280b          | 1.14822   | 1.04831         | 0          | 1         | 1         |
| S100b            | 11.8411   | 9.59278         | 0          | 1         | 1         |
| Mcm3ap           | 3.14815   | 2.77214         | -0.183505  | 0.166021  | 0.502767  |
| Lss              | 4.6989    | 4.85796         | 0          | 1         | 1         |
| Lss_j5           | 2.69846   | 1.90054         | 0          | 1         | 1         |
| Lss_j6           | 2.13574   | 2.61391         | 0          | 1         | 1         |
| Slc19a1          | 8.01355   | 8.99446         | 0.166596   | 0.248137  | 0.595431  |
| Pofut2           | 10.0476   | 9.65947         | -0.056841  | 0.632562  | 0.857248  |
| Itgb2_j1         | 0.129794  | 0.0122042       | -3.41077   | 0.399988  | 1         |
| Pttg1ip          | 24.6333   | 26.5151         | 0.106205   | 0.265076  | 0.613897  |
| Sumo3            | 9.61024   | 9.09659         | -0.0792466 | 0.50952   | 0.790813  |
| Ube2g2           | 27.0385   | 29.8284         | 0.141671   | 0.145158  | 0.472985  |
| C330046G03Rik_j3 | 0.279524  | 0.184075        | -0.602679  | 0.458186  | 0.7608    |
| C330046G03Rik_j5 | 0.225279  | 0.100086        | -1.17048   | 0.303536  | 0.649155  |
| C330046G03Rik_j7 | 0.157706  | 0.0622095       | -1.34203   | 0.201753  | 0.545317  |
| 1810043G02Rik    | 1.07418   | 1.09826         | 0.031971   | 0.87589   | 0.960619  |
| 1810043G02Rik_j1 | 1.00673   | 0.830189        | -0.278167  | 0.312479  | 0.657049  |
| Icosl            | 0.513138  | 0.476076        | -0.108157  | 0.759575  | 0.91718   |
| Icosl_j5         | 0.367528  | 0.227593        | -0.691397  | 0.282486  | 0.63103   |
| Cstb             | 41.9851   | 48.7082         | 0.214285   | 0.060252  | 0.289092  |
| Ilvbl_j1         | 3.87009   | 3.17856         | 0          | 1         | 1         |
| AK164315_j2      | 0.0583392 | 0 -1.79769e+308 |            | 0.0815725 | 1         |
| AK164315_j1      | 0.0511937 | 0 -1.79769e+308 |            | 0.0992705 | 1         |
| Slc1a6           | 0.0756284 | 0.152714        | 1.01383    | 0.305571  | 1         |
| Slc1a6_j3        | 1.43628   | 1.15263         | -0.317406  | 0.257614  | 0.606366  |
| Gm16517          | 6.31156   | 6.74248         | 0.0952831  | 0.423003  | 0.738638  |
| Gm16517_j4       | 4.19448   | 4.49987         | 0.101392   | 0.722954  | 0.901338  |
| Bsg              | 86.8244   | 86.8761         | 0          | 1         | 1         |
| Hcn2             | 36.5806   | 23.0564         | -0.665908  | 1.53E-12  | 2.12E-10  |
| Hcn2_j1          | 1.19586   | 0.990728        | -0.271492  | 0.405937  | 0.72756   |
| Fstl3_j1         | 0.145069  | 0.0620486       | -1.22527   | 0.36446   | 0.698412  |

|                  |           |           |            |           |           |
|------------------|-----------|-----------|------------|-----------|-----------|
| Fstl3            | 0.722372  | 1.38836   | 0.942568   | 0.0015672 | 0.0204576 |
| FLRG             | 1.12851   | 1.28954   | 0.192443   | 0.534715  | 0.805843  |
| Palm_j1          | 0.752548  | 0.632337  | -0.251089  | 0.694981  | 0.887479  |
| 9130017N09Rik_j2 | 0.125175  | 0.123634  | -0.0178682 | 0.981095  | 1         |
| XLOC_002395      | 0.211805  | 0.0808366 | 0          | 1         | 1         |
| Ptbp1_j2         | 0.103579  | 0.198026  | 0          | 1         | 1         |
| Ptbp1_j9         | 1.63349   | 2.43603   | 0          | 1         | 1         |
| Arid3a           | 0.357951  | 0.0738051 | -2.27797   | 0.0003082 | 0.0054628 |
| Arid3a           | 0.460044  | 2.36E-05  | -14.2511   | 0.939083  | 0.981439  |
| Wdr18            | 12.6721   | 13.7228   | 0.114918   | 0.24258   | 0.590063  |
| Cnn2             | 2.31493   | 2.65387   | 0.19713    | 0.305188  | 0.650262  |
| Hmha1_j7         | 0.119112  | 0.0625627 | -0.92894   | 0.317694  | 1         |
| Hmha1_j10        | 0.046257  | 0.0716866 | 0.632033   | 0.586547  | 1         |
| Gpx4_j4          | 0.309151  | 0.288772  | -0.0983801 | 0.69495   | 0.887479  |
| Stk11            | 3.54392   | 3.70109   | 0          | 1         | 1         |
| Atp5d_j2         | 140.024   | 149.258   | 0          | 1         | 1         |
| Cirbp            | 23.1904   | 19.2151   | -0.271288  | 0.0220948 | 0.15094   |
| Efna2            | 1.02883   | 1.17364   | 0.189985   | 0.501096  | 0.785318  |
| Mum1_j1          | 4.65419   | 2.63766   | 0          | 1         | 1         |
| Mum1             | 1.79646   | 1.61427   | 0          | 1         | 1         |
| Mum1_j3          | 4.63135   | 5.79333   | 0          | 1         | 1         |
| Mum1_j4          | 6.411     | 7.58438   | 0          | 1         | 1         |
| Ndufs7_j1        | 53.1988   | 58.7188   | 0.142429   | 0.166164  | 0.502787  |
| Dazap1           | 12.7723   | 15.9596   | 0.321399   | 0.0115184 | 0.0951157 |
| Rps15_j1         | 27.0957   | 30.0271   | 0.148203   | 0.29987   | 0.646423  |
| Apc2_j2          | 2.08106   | 1.33056   | -0.645281  | 3.02E-05  | 0.0007786 |
| Apc2_j5          | 1.05668   | 0.626331  | -0.754537  | 0.0002536 | 0.0046735 |
| Reep6            | 0.306983  | 0.268425  | -0.193643  | 0.729129  | 0.903998  |
| Reep6            | 0.642122  | 0.575958  | -0.156884  | 0.663665  | 0.872653  |
| Scamp4           | 14.6556   | 16.0489   | 0.131016   | 0.378703  | 0.710354  |
| Csnk1g2_j1       | 36.9519   | 35.8924   | 0          | 1         | 1         |
| Dot1l_j1         | 1.55394   | 1.84493   | 0.247629   | 0.0775475 | 0.337104  |
| Sppl2b           | 0.0567751 | 0.184698  | 1.70183    | 0.0200353 | 0.141023  |
| Sppl2b_j5        | 2.16376   | 2.0885    | -0.0510733 | 0.823697  | 0.943114  |
| 3110056O03Rik    | 0.244332  | 0.0444257 | -2.45938   | 0.013187  | 0.105084  |
| Gadd45b          | 3.12559   | 2.64192   | -0.242545  | 0.170608  | 0.507473  |
| Thop1            | 19.775    | 21.9385   | 0.149787   | 0.123427  | 0.437384  |
| Map2k2           | 16.4873   | 17.5735   | 0          | 1         | 1         |
| Map2k2           | 32.0525   | 35.4192   | 0          | 1         | 1         |
| XLOC_002427      | 0.12601   | 0.194148  | 0          | 1         | 1         |
| Zbtb7a_j1        | 7.81314   | 9.60393   | 0          | 1         | 1         |
| Zbtb7a           | 5.32532   | 5.45699   | 0          | 1         | 1         |
| Zbtb7a           | 6.54559   | 3.90862   | 0          | 1         | 1         |
| Eef2_j2          | 58.6195   | 54.9926   | -0.0921417 | 0.304946  | 0.65013   |
| Dapk3            | 9.75993   | 9.53913   | -0.033014  | 0.781435  | 0.926214  |
| Zfr2_j2          | 1.56989   | 1.45637   | 0          | 1         | 1         |
| Apba3            | 2.14525   | 2.63133   | 0          | 1         | 1         |

|                  |           |                 |            |           |           |
|------------------|-----------|-----------------|------------|-----------|-----------|
| Pip5k1c          | 38.4017   | 34.2792         | 0          | 1         | 1         |
| 2510012J08Rik    | 5.65513   | 6.43929         | 0.18734    | 0.120639  | 0.432634  |
| Tbxa2r_j2        | 0.174896  | 0.0547566       | -1.67539   | 0.180173  | 0.519814  |
| Tbxa2r           | 0.9528    | 0.861637        | -0.145093  | 0.619105  | 0.85046   |
| F630110N24Rik    | 2.30286   | 2.15707         | -0.0943517 | 0.476332  | 0.77206   |
| Dohh_j3          | 0.271847  | 0.349804        | 0.36375    | 0.530572  | 0.80314   |
| Dohh_j2          | 3.31672   | 3.65239         | 0.139083   | 0.391356  | 0.717903  |
| Dohh_j4          | 6.82736   | 7.35176         | 0.10676    | 0.667386  | 0.8742    |
| 2210404O07Rik    | 0.176449  | 0.162617        | -0.117778  | 0.919511  | 0.974745  |
| 2210404O07Rik_j3 | 0.237895  | 0.299743        | 0.333403   | 0.5846    | 0.833464  |
| Aes              | 50.5934   | 43.1957         | 0          | 1         | 1         |
| Aes_j5           | 38.587    | 36.8583         | 0          | 1         | 1         |
| Ankrd24_j8       | 0.75753   | 0.620832        | 0          | 1         | 1         |
| Ankrd24_j7       | 0.851118  | 0.310763        | 0          | 1         | 1         |
| Ankrd24_j6       | 2.10701   | 1.33433         | 0          | 1         | 1         |
| Ankrd24_j14      | 0.463117  | 0.155575        | 0          | 1         | 1         |
| XLOC_002448      | 0.127308  | 0.0957647       | -0.41076   | 0.471627  | 1         |
| BC062115_j6      | 0.0524363 | 0.0474431       | -0.144367  | 0.901175  | 1         |
| XLOC_002449      | 0.235659  | 0.259141        | 0.137033   | 0.862971  | 0.956568  |
| AU041133_j2      | 0.385818  | 0.252839        | -0.609704  | 0.233683  | 0.581007  |
| Mif1             | 0.243367  | 0.0643262       | -1.91965   | 0.0228579 | 0.154465  |
| Hcfc2_j1         | 0.189921  | 0 -1.79769e+308 |            | 1.07E-06  | 4.38E-05  |
| Txnrd1           | 7.6361    | 5.8511          | 0          | 1         | 1         |
| Chst11           | 1.62475   | 1.25148         | 0          | 1         | 1         |
| Chst11_j1        | 6.91199   | 6.74199         | 0          | 1         | 1         |
| D10Wsu102e       | 8.3871    | 8.16458         | -0.0387949 | 0.728788  | 0.903826  |
| A230046K03Rik_j1 | 2.9664    | 2.97169         | 0          | 1         | 1         |
| 1500009L16Rik_j1 | 0.571721  | 0.27053         | -1.07952   | 0.137633  | 0.461429  |
| 1500009L16Rik    | 1.51195   | 1.5871          | 0.0699795  | 0.812091  | 0.938348  |
| Tcp11l2          | 8.6006    | 8.48024         | -0.020333  | 0.868598  | 0.958331  |
| Polr3b           | 5.45828   | 5.31503         | -0.0383686 | 0.734717  | 0.906438  |
| Ric8b            | 3.09241   | 4.07768         | 0          | 1         | 1         |
| Ric8b            | 6.08804   | 5.66615         | 0          | 1         | 1         |
| Al597468         | 1.0372    | 1.08693         | 0          | 1         | 1         |
| XLOC_002469      | 0.148674  | 0 -1.79769e+308 |            | 0.0032319 | 0.0365821 |
| XLOC_002469      | 0.17672   | 0.0901866       | -0.970477  | 0.314443  | 0.658629  |
| Gm8394           | 66.3594   | 67.1318         | 0.016695   | 0.85881   | 0.955302  |
| Btbd11           | 1.18429   | 0.702011        | 0          | 1         | 1         |
| Pwp1             | 7.11064   | 6.8711          | -0.0494397 | 0.662094  | 0.871836  |
| Fbxo7            | 2.65934   | 2.57096         | 0          | 1         | 1         |
| Fbxo7            | 0.153223  | 0.186065        | 0          | 1         | 1         |
| Timp3            | 19.023    | 18.7009         | 0          | 1         | 1         |
| 1810014B01Rik    | 0.379177  | 0.587202        | 0.630987   | 0.174945  | 0.513197  |
| 1810014B01Rik    | 0.540757  | 0.395833        | -0.45009   | 0.357813  | 0.693651  |
| Nt5dc3           | 7.44528   | 4.96063         | 0          | 1         | 1         |
| Igf1             | 0.84419   | 1.31872         | 0.643494   | 8.96E-05  | 0.0019547 |
| Nup37            | 1.11969   | 1.14539         | 0.0327431  | 0.922684  | 0.975933  |

|             |           |                 |             |           |           |
|-------------|-----------|-----------------|-------------|-----------|-----------|
| Ccdc53      | 10.431    | 10.9119         | 0.0650281   | 0.706829  | 0.89314   |
| XLOC_002486 | 0.160732  | 0.141521        | -0.183644   | 0.766584  | 0.920366  |
| Gnptab_j1   | 0.318274  | 0.130802        | -1.28289    | 0.0281578 | 0.178056  |
| Gnptab      | 11.4271   | 11.4927         | 0.008261    | 0.930909  | 0.978859  |
| Arl1        | 3.30286   | 3.29429         | -0.00374851 | 0.981168  | 0.994152  |
| Arl1_j4     | 0.296885  | 0.289125        | -0.0382132  | 0.957084  | 0.987657  |
| Uhrf1bp1_j1 | 2.17025   | 1.73934         | -0.319327   | 0.0499299 | 0.258177  |
| Uhrf1bp1    | 3.17637   | 2.95047         | -0.106432   | 0.437241  | 0.747555  |
| Uhrf1bp1_j3 | 1.12477   | 1.01852         | -0.143154   | 0.504032  | 0.787387  |
| Anks1b_j1   | 0.0541413 | 0.0438847       | 0           | 1         | 1         |
| Anks1b_j5   | 1.28548   | 1.34638         | 0           | 1         | 1         |
| Anks1b_j4   | 4.25717   | 7.28931         | 0           | 1         | 1         |
| Ikbip       | 1.31627   | 1.30859         | -0.00844291 | 0.976102  | 0.99312   |
| Ikbip       | 2.38327   | 2.45979         | 0.0455873   | 0.854104  | 0.953758  |
| Cdk17       | 2.11741   | 1.9325          | 0           | 1         | 1         |
| Lta4h       | 16.052    | 16.8918         | 0.07357     | 0.500919  | 0.785168  |
| Hal         | 2.42405   | 1.75709         | -0.464233   | 0.0083075 | 0.0747028 |
| Ntn4        | 0.768773  | 0.426541        | -0.849873   | 0.0114902 | 0.0949152 |
| Gm3571      | 132.956   | 151.629         | 0.1896      | 0.028677  | 0.18024   |
| Fgd6        | 0.463962  | 0.427882        | -0.116794   | 0.629128  | 0.855833  |
| Nr2c1       | 2.98482   | 2.66434         | -0.163868   | 0.272619  | 0.621437  |
| Ndufa12_j1  | 1.22252   | 0.92376         | -0.404268   | 0.204283  | 0.548429  |
| Tmcc3       | 2.49539   | 2.06391         | 0           | 1         | 1         |
| Tmcc3_j1    | 1.39614   | 1.49244         | 0           | 1         | 1         |
| Tmcc3       | 0.141527  | 0               | 0           | 1         | 1         |
| Ccdc41      | 6.43228   | 5.98969         | -0.102848   | 0.3958    | 0.720791  |
| Ube2n_j4    | 0.151242  | 0.175096        | 0.211285    | 0.710909  | 0.894923  |
| Eea1        | 3.4092    | 2.60009         | 0           | 1         | 1         |
| Eea1_j2     | 0.286514  | 0.629161        | 0           | 1         | 1         |
| Btg1        | 21.1493   | 25.9598         | 0.295671    | 0.0038079 | 0.0414262 |
| Dcn         | 21.9589   | 30.3948         | 0           | 1         | 1         |
| Dcn_j1      | 4.17261   | 14.1647         | 0           | 1         | 1         |
| Dcn         | 47.7992   | 62.5173         | 0           | 1         | 1         |
| Lum         | 11.0182   | 15.7252         | 0.513191    | 4.28E-06  | 0.0001476 |
| XLOC_002519 | 0.0994791 | 0.0283514       | -1.81097    | 0.236287  | 1         |
| XLOC_002519 | 0.0698129 | 0 -1.79769e+308 |             | 0.0363559 | 1         |
| XLOC_002519 | 0.172314  | 0 -1.79769e+308 |             | 0.0252604 | 0.165512  |
| Atp2b1      | 9.85492   | 9.687           | 0           | 1         | 1         |
| XLOC_002521 | 0.27284   | 0.252241        | -0.113255   | 0.763629  | 0.918719  |
| Poc1b       | 0.728209  | 0.70563         | -0.0454421  | 0.857595  | 0.954849  |
| Poc1b       | 1.28305   | 1.26119         | -0.0247873  | 0.921849  | 0.975553  |
| Wdr51b_j2   | 0.534683  | 0.853269        | 0.674317    | 0.0655727 | 0.305273  |
| Dusp6       | 4.50009   | 5.23418         | 0.218011    | 0.11854   | 0.428543  |
| Dusp6_j1    | 4.44967   | 5.87726         | 0.401444    | 0.0332273 | 0.198887  |
| Kitl        | 6.36281   | 6.87413         | 0           | 1         | 1         |
| Cep290_j1   | 0.881728  | 0.826288        | -0.0936891  | 0.612677  | 0.847359  |
| Cep290_j4   | 0.441686  | 0.483284        | 0.129852    | 0.750818  | 0.913584  |

|             |           |                 |            |           |          |
|-------------|-----------|-----------------|------------|-----------|----------|
| Mgat4c_j2   | 0.199005  | 0.190656        | -0.0618318 | 0.912654  | 0.972469 |
| Mgat4c      | 0.473875  | 0.757088        | 0.675954   | 0.020454  | 0.143143 |
| Rassf9      | 0.57269   | 0.486098        | -0.236505  | 0.35023   | 0.687775 |
| Slc6a15     | 4.40223   | 4.15768         | -0.0824547 | 0.530111  | 0.802942 |
| Slc6a15_j2  | 30.1304   | 27.6599         | -0.123421  | 0.221972  | 0.569158 |
| Ccdc59      | 3.46641   | 3.62088         | 0.062896   | 0.699208  | 0.889208 |
| Ppfia2_j6   | 1.35135   | 1.71294         | 0.342076   | 0.0977127 | 0.386292 |
| Ppfia2_j8   | 0.139829  | 0.228725        | 0.709951   | 0.193021  | 0.535391 |
| Ppfia2_j9   | 0.826248  | 1.12587         | 0.446391   | 0.0954201 | 0.381368 |
| Lin7a_j3    | 0.547456  | 0.391697        | 0          | 1         | 1        |
| Lin7a       | 0.638884  | 0.4817          | 0          | 1         | 1        |
| Lin7a       | 0.197861  | 0.123276        | 0          | 1         | 1        |
| Lin7a_j2    | 0.187959  | 0.0793119       | 0          | 1         | 1        |
| XLOC_002533 | 0.0654194 | 0.0933421       | 0          | 1         | 1        |
| Ppp1r12a    | 5.64463   | 6.13172         | 0          | 1         | 1        |
| Pawr_j1     | 1.41985   | 1.11731         | -0.345714  | 0.269562  | 0.618722 |
| E2f7_j1     | 0.143511  | 0.0553631       | -1.37416   | 0.0832626 | 0.351738 |
| Csrp2       | 1.74635   | 2.331           | 0.41661    | 0.113816  | 0.419484 |
| Csrp2_j3    | 1.89163   | 0.932986        | -1.0197    | 0.180495  | 0.520279 |
| Gm5428      | 69.8326   | 79.7102         | 0.190864   | 0.038306  | 0.217704 |
| Osbpl8      | 3.27605   | 2.96195         | 0          | 1         | 1        |
| Osbpl8_j3   | 3.2788    | 1.53815         | 0          | 1         | 1        |
| Bbs10       | 1.63899   | 1.57416         | -0.0582237 | 0.746969  | 0.911835 |
| Nap1l1_j1   | 0.228871  | 0.172006        | 0          | 1         | 1        |
| Nap1l1_j4   | 0.303687  | 0.27627         | 0          | 1         | 1        |
| Nap1l1_j6   | 1.01951   | 0.802124        | 0          | 1         | 1        |
| Phlda1      | 1.21147   | 2.9211          | 0          | 1         | 1        |
| Krr1        | 3.08177   | 3.26652         | 0.0839958  | 0.522888  | 0.799141 |
| Zfc3h1      | 0.589494  | 0.624597        | 0          | 1         | 1        |
| Tspan8      | 14.452    | 12.2599         | 0          | 1         | 1        |
| Tspan8      | 35.763    | 34.4241         | 0          | 1         | 1        |
| Ptpr        | 4.7985    | 4.04603         | 0          | 1         | 1        |
| Ptpr_j3     | 2.18167   | 1.94054         | 0          | 1         | 1        |
| AK016591_j1 | 0.256996  | 0.386152        | 0.587421   | 0.0775801 | 0.337104 |
| AK016788_j4 | 0.170834  | 0               | 0          | 1         | 1        |
| AK016788_j3 | 0.293487  | 0.106642        | 0          | 1         | 1        |
| AK016788_j8 | 0.274303  | 0               | 0          | 1         | 1        |
| XLOC_002557 | 0.0613215 | 0.0307141       | -0.997491  | 0.684152  | 1        |
| Cpm_j1      | 0.0970713 | 0.0674455       | -0.525324  | 0.639572  | 1        |
| XLOC_002559 | 0.100689  | 0 -1.79769e+308 | 0.0372455  | 0.0372455 | 1        |
| Mdm1_j2     | 0.195984  | 0.142508        | -0.459689  | 0.665983  | 0.873396 |
| Mdm1_j11    | 0.131228  | 0.104548        | -0.327904  | 0.719158  | 1        |
| Mdm1_j12    | 0.0851562 | 0.0633626       | -0.426481  | 0.724219  | 1        |
| Grip1_j1    | 0.645904  | 0               | 0          | 1         | 1        |
| Grip1_j3    | 1.36784   | 1.94312         | 0          | 1         | 1        |
| Tmbim4      | 58.5205   | 56.0163         | -0.0630968 | 0.543638  | 0.811014 |
| Llph_j1     | 0.280539  | 0.0457763       | -2.61553   | 0.0361921 | 0.210104 |

|               |           |            |               |           |           |
|---------------|-----------|------------|---------------|-----------|-----------|
| Llph_j7       | 1.48853   | 1.78044    | 0.258347      | 0.267768  | 0.616423  |
| 9230105E05Rik | 0.332666  | 0.289954   | -0.198251     | 0.726735  | 0.90322   |
| Gns           | 25.1484   | 25.7457    | 0.0338674     | 0.704733  | 0.892128  |
| BC048403      | 0.775832  | 0.621821   | -0.319245     | 0.301272  | 0.647624  |
| BC048403      | 3.8903    | 3.50903    | -0.148807     | 0.270318  | 0.619522  |
| Avpr1a        | 0.350438  | 0.50285    | 0.520969      | 0.0245519 | 0.16231   |
| Ppm1h         | 3.8404    | 2.81234    | 0             | 1         | 1         |
| Ppm1h_j4      | 2.3673    | 0.0218687  | 0             | 1         | 1         |
| Fam19a2       | 3.24172   | 2.46588    | -0.394655     | 0.0119636 | 0.0979788 |
| Fam19a2_j1    | 17.6655   | 8.91412    | -0.986769     | 0         | 0         |
| Lrig3         | 0.294752  | 0.37139    | 0.333433      | 0.297219  | 0.643783  |
| Lrig3_j2      | 0.0652484 | 0          | -1.79769e+308 | 0.0043062 | 1         |
| Lrig3_j4      | 0.281912  | 0.176814   | -0.673013     | 0.535665  | 0.80631   |
| XLOC_002576   | 0.191146  | 0.146402   | -0.384743     | 0.565471  | 0.823861  |
| XLOC_002576   | 0.0834559 | 0.0600092  | -0.475831     | 0.690011  | 1         |
| Ctdsp2_j4     | 0.103875  | 0.0106931  | -3.2801       | 0.180163  | 1         |
| Ctdsp2_j3     | 0.0693857 | 0.115768   | 0.738523      | 0.447028  | 1         |
| Avil_j6       | 12.0337   | 11.3263    | 0             | 1         | 1         |
| Avil_j11      | 39.7313   | 18.7478    | 0             | 1         | 1         |
| Avil_j13      | 0.978795  | 1.65689    | 0             | 1         | 1         |
| Mettl1        | 6.36097   | 6.95302    | 0.128394      | 0.289102  | 0.63673   |
| Cdk4          | 9.57789   | 10.7731    | 0             | 1         | 1         |
| Agap2         | 2.72413   | 1.84006    | -0.566044     | 0.0006404 | 0.0099888 |
| B4galnt1      | 0.638237  | 0.942005   | 0.561641      | 0.0699209 | 0.317349  |
| B4galnt1      | 5.60909   | 5.34038    | -0.0708222    | 0.691431  | 0.885712  |
| Dctn2_j3      | 0.187946  | 0.0314616  | 0             | 1         | 1         |
| R3hdm2_j11    | 0.195758  | 0.15397    | 0             | 1         | 1         |
| Stac3_j11     | 0.0815302 | 0.0457827  | -0.83253      | 0.448621  | 1         |
| Stac3_j10     | 0.115977  | 0.0852964  | -0.443288     | 0.579832  | 1         |
| Stac3_j9      | 0.0644502 | 0.0809626  | 0.329071      | 0.734419  | 1         |
| Ndufa4l2      | 0.515997  | 0.68745    | 0.413892      | 0.119427  | 0.429997  |
| Stat6         | 5.39897   | 2.40271    | -1.16802      | 8.49E-10  | 7.22E-08  |
| AK005897      | 0.191284  | 0.163831   | -0.223501     | 0.731585  | 0.905037  |
| Tmem194       | 0.157296  | 0.289395   | 0.879557      | 0.0298638 | 0.185168  |
| Tmem194_j1    | 0.299787  | 0.0632211  | -2.24546      | 0.0008539 | 0.0125993 |
| Myo1a_j3      | 2.72621   | 0.00416513 | 0             | 1         | 1         |
| Myo1a_j4      | 0.335487  | 0          | 0             | 1         | 1         |
| Zbtb39        | 1.46821   | 1.61413    | 0.136695      | 0.352306  | 0.68925   |
| Prim1_j6      | 0.788805  | 0.271158   | -1.54053      | 0.0224875 | 0.152894  |
| Prim1_j2      | 1.55879   | 1.25834    | -0.308908     | 0.321482  | 0.66458   |
| Atp5b         | 657.239   | 650.924    | -0.0139295    | 0.882616  | 0.962648  |
| Baz2a_j4      | 0.373686  | 0.17852    | -1.06574      | 0.0006998 | 0.0107239 |
| Baz2a_j6      | 0.0906318 | 0.0795759  | -0.187686     | 0.693661  | 1         |
| Baz2a_j9      | 0.153763  | 0.48258    | 1.65006       | 1.97E-06  | 7.48E-05  |
| Gls2          | 1.78178   | 0.836463   | 0             | 1         | 1         |
| Stat2         | 8.2702    | 9.24297    | 0             | 1         | 1         |
| Pan2_j1       | 0.475347  | 0.170919   | -1.47567      | 0.0112359 | 0.0934641 |



|               |           |           |            |           |           |
|---------------|-----------|-----------|------------|-----------|-----------|
| Pan2_j3       | 0.0628091 | 0.0639214 | 0.0253255  | 0.977954  | 1         |
| Pan2_j2       | 0.62633   | 0.21072   | -1.5716    | 0.0004737 | 0.0077828 |
| Cnpy2         | 4.68005   | 4.35205   | -0.104829  | 0.623333  | 0.852781  |
| Cnpy2_j2      | 16.0949   | 15.0123   | -0.100462  | 0.545092  | 0.811986  |
| Cs            | 15.8029   | 15.4409   | 0          | 1         | 1         |
| Cs_j1         | 82.9773   | 79.1619   | 0          | 1         | 1         |
| Ankrd52       | 18.5312   | 15.8448   | 0          | 1         | 1         |
| Ankrd52_j1    | 2.41783   | 2.90394   | 0          | 1         | 1         |
| Rnf41         | 13.3291   | 9.68646   | 0          | 1         | 1         |
| Smarcc2       | 7.08958   | 7.18042   | 0          | 1         | 1         |
| Wibg          | 2.81373   | 2.1732    | 0          | 1         | 1         |
| Pym           | 0.670429  | 1.493     | 0          | 1         | 1         |
| Pym_j4        | 1.16037   | 1.30468   | 0          | 1         | 1         |
| Dnajc14       | 3.01264   | 2.57842   | 0          | 1         | 1         |
| Cd63_j7       | 0.290053  | 0.808372  | 1.4787     | 0.0586098 | 0.284547  |
| Itga7_j1      | 45.6206   | 89.7477   | 0          | 1         | 1         |
| Itga7         | 12.4587   | 20.6229   | 0          | 1         | 1         |
| Itga7_j5      | 0.0120531 | 0.0801204 | 0          | 1         | 1         |
| Oprm1         | 6.21729   | 5.95603   | 0          | 1         | 1         |
| XLOC_002621   | 0.178566  | 0.148016  | -0.270708  | 0.753911  | 0.915071  |
| Myct1         | 0.441523  | 0.512232  | 0.214309   | 0.449838  | 0.755765  |
| Esr1_j4       | 0.506451  | 0.228053  | 0          | 1         | 1         |
| Esr1          | 0.477451  | 0.535326  | 0          | 1         | 1         |
| Esr1_j5       | 0.213486  | 0.061114  | 0          | 1         | 1         |
| 1700052N19Rik | 3.86873   | 3.56313   | -0.118715  | 0.487855  | 0.778453  |
| Akap12_j3     | 10.7479   | 7.30066   | 0          | 1         | 1         |
| Akap12_j4     | 0.417389  | 4.51514   | 0          | 1         | 1         |
| Akap12_j5     | 0.840173  | 0.18885   | 0          | 1         | 1         |
| Mthfd1l       | 4.02346   | 4.24557   | 0          | 1         | 1         |
| Plekhg1_j3    | 0.0850572 | 7.65E-05  | 0          | 1         | 1         |
| Plekhg1       | 1.39693   | 0.45861   | 0          | 1         | 1         |
| lyd_j1        | 0.349316  | 0.0878834 | -1.99087   | 0.124464  | 0.439692  |
| Ppp1r14c_j1   | 2.52743   | 1.25245   | 0          | 1         | 1         |
| Ppp1r14c      | 2.94449   | 2.78991   | 0          | 1         | 1         |
| Pcmt1_j5      | 1.7099    | 5.32001   | 0          | 1         | 1         |
| Pcmt1_j6      | 2.52205   | 1.904     | 0          | 1         | 1         |
| Pcmt1         | 68.3241   | 59.5968   | 0          | 1         | 1         |
| BC013529_j1   | 1.60288   | 2.48229   | 0          | 1         | 1         |
| BC013529      | 5.57578   | 5.54564   | 0          | 1         | 1         |
| Tab2          | 6.4168    | 4.63224   | 0          | 1         | 1         |
| XLOC_002636   | 0.092008  | 0.0838211 | -0.134446  | 0.898249  | 1         |
| Ust_j5        | 0.152551  | 0.223355  | 0          | 1         | 1         |
| Ust_j4        | 0.573374  | 0.341862  | 0          | 1         | 1         |
| Ust_j3        | 0.161852  | 0         | 0          | 1         | 1         |
| Sash1_j2      | 0.910776  | 0.867994  | 0          | 1         | 1         |
| Sash1         | 0.957367  | 0.673776  | 0          | 1         | 1         |
| Samd5         | 0.426849  | 0.40524   | -0.0749504 | 0.77875   | 0.925532  |

|                  |           |                 |             |           |           |
|------------------|-----------|-----------------|-------------|-----------|-----------|
| Stxbp5_j3        | 1.57908   | 2.43104         | 0           | 1         | 1         |
| Stxbp5           | 6.42007   | 6.55824         | 0           | 1         | 1         |
| 9130014G24Rik_j1 | 0.292949  | 0.335944        | 0.19757     | 0.671916  | 0.876137  |
| 9130014G24Rik_j8 | 0.142657  | 1.82E-05        | -12.935     | 0.954201  | 0.98677   |
| 9130014G24Rik_j7 | 0.0679792 | 0.147884        | 1.1213      | 0.0510435 | 1         |
| Rab32_j2         | 0.0481836 | 0.0349567       | -0.462974   | 0.778603  | 1         |
| Rab32            | 0.537709  | 1.0754          | 0.999975    | 0.0015036 | 0.0197772 |
| Utrn_j5          | 3.42254   | 0.991147        | 0           | 1         | 1         |
| Utrn_j7          | 2.04789   | 1.51306         | 0           | 1         | 1         |
| Utrn_j8          | 1.32967   | 1.24699         | 0           | 1         | 1         |
| AK045519_j1      | 0.193833  | 0.170296        | -0.186773   | 0.81741   | 0.940822  |
| Stx11            | 0.130898  | 0.0511814       | -1.35476    | 0.160025  | 1         |
| Stx11_j1         | 0.148986  | 0.251684        | 0.756436    | 0.151353  | 0.482423  |
| Stx11            | 0.441249  | 0.37231         | -0.245089   | 0.510445  | 0.791113  |
| Stx11            | 0.258654  | 0.495019        | 0.93646     | 0.0153602 | 0.117024  |
| Ltv1             | 5.88717   | 3.795           | 0           | 1         | 1         |
| Phactr2_j5       | 7.40224   | 10.9332         | 0           | 1         | 1         |
| Pex3             | 10.2014   | 9.04938         | -0.172876   | 0.149597  | 0.47913   |
| Aig1             | 30.2863   | 24.9697         | -0.278487   | 0.0098388 | 0.0847209 |
| Gpr126_j1        | 1.52096   | 1.28024         | 0           | 1         | 1         |
| Vta1             | 20.7722   | 20.4679         | -0.0212897  | 0.856354  | 0.954582  |
| Heca             | 3.54787   | 2.95136         | 0           | 1         | 1         |
| 3110003A17Rik_j1 | 2.5621    | 2.99912         | 0.22721     | 0.505462  | 0.78827   |
| 3110003A17Rik    | 1.83635   | 2.50504         | 0.447992    | 0.13602   | 0.458852  |
| Ccdc28a          | 24.5558   | 23.0107         | -0.0937587  | 0.39894   | 0.72264   |
| Hebp2            | 26.9718   | 21.2591         | -0.343372   | 0.0008344 | 0.0123961 |
| D10Bwg1379e      | 1.80227   | 1.46605         | 0           | 1         | 1         |
| Tnfaip3          | 0.650724  | 0.276718        | -1.23363    | 0.0003986 | 0.0067518 |
| Slc35d3_j1       | 0.590635  | 0.328731        | -0.845356   | 0.0974466 | 0.385835  |
| Slc35d3          | 0.598056  | 0.368322        | -0.699314   | 0.0770577 | 0.335773  |
| Pex7             | 7.36752   | 6.62896         | -0.152397   | 0.183984  | 0.524679  |
| Pde7b_j2         | 0.716366  | 0.932833        | 0           | 1         | 1         |
| Pde7b            | 1.1571    | 0.909445        | 0           | 1         | 1         |
| Tbpl1_j1         | 1.10985   | 0.815992        | -0.443734   | 0.348393  | 0.686685  |
| Tbpl1_j2         | 2.4699    | 1.00679         | -1.29469    | 1.91E-05  | 0.0005351 |
| XLOC_002674      | 0.0805282 | 0.0204547       | -1.97706    | 0.508818  | 1         |
| Rps12_j5         | 0.104447  | 8.64E-05        | -10.2388    | 0.917492  | 1         |
| Rps12_j8         | 0.493482  | 0.621874        | 0.333625    | 0.46645   | 0.766108  |
| Rps12_j13        | 0.876781  | 0.93559         | 0.0936606   | 0.882068  | 0.962591  |
| Enpp1            | 2.335     | 2.33148         | -0.00218113 | 0.986957  | 0.996237  |
| Enpp3            | 0.234754  | 0.145892        | -0.686243   | 0.107222  | 0.407014  |
| Arg1             | 0.264186  | 0.465616        | 0.817585    | 0.0506995 | 0.260788  |
| XLOC_002680      | 0.197798  | 0.106078        | -0.89891    | 0.414501  | 0.732858  |
| Akap7_j8         | 0.0599688 | 0 -1.79769e+308 | 0.0326247   |           | 1         |
| Akap7_j9         | 0.367825  | 0.310459        | -0.244615   | 0.63886   | 0.860184  |
| Tmem200a_j1      | 7.8022    | 6.73168         | -0.212915   | 0.0908412 | 0.370489  |
| Tmem200a         | 2.47509   | 2.22874         | -0.151257   | 0.366737  | 0.700273  |

|               |            |           |               |           |           |
|---------------|------------|-----------|---------------|-----------|-----------|
| L3mbtl3_j8    | 0.229694   | 0.112054  | 0             | 1         | 1         |
| L3mbtl3_j4    | 0.133453   | 0         | 0             | 1         | 1         |
| Lama2_j6      | 0.185155   | 0.129133  | -0.519881     | 0.207861  | 0.552228  |
| Rnf146        | 6.5243     | 3.67611   | 0             | 1         | 1         |
| Rnf146        | 3.98393    | 5.09223   | 0             | 1         | 1         |
| Rnf146        | 3.15847    | 2.99822   | 0             | 1         | 1         |
| Cenpw         | 0.551992   | 0.531459  | -0.0546875    | 0.889936  | 0.965032  |
| Trmt11_j3     | 1.1367     | 0.544041  | -1.06306      | 0.0106163 | 0.0893937 |
| Trmt11        | 1.69747    | 1.75397   | 0.0472426     | 0.841149  | 0.949877  |
| Hint3         | 17.3829    | 14.419    | -0.269699     | 0.0031415 | 0.0357663 |
| Ncoa7_j1      | 23.9573    | 21.9195   | 0             | 1         | 1         |
| Ncoa7_j2      | 7.31461    | 5.9246    | 0             | 1         | 1         |
| Hey2          | 15.9109    | 14.5307   | -0.130905     | 0.203777  | 0.547976  |
| Tpd52l1       | 2.34743    | 2.13823   | -0.134665     | 0.595066  | 0.838618  |
| Tpd52l1       | 0.67321    | 0.44327   | -0.602872     | 0.293108  | 0.640163  |
| Tpd52l1       | 1.62356    | 0.946822  | -0.777995     | 0.0396654 | 0.222679  |
| Rnf217        | 2.01121    | 2.07537   | 0.0452995     | 0.705258  | 0.892225  |
| Clvs2         | 3.22798    | 3.15559   | -0.032722     | 0.841478  | 0.949916  |
| Clvs2_j1      | 0.61282    | 0.806541  | 0.396283      | 0.281306  | 0.629634  |
| Zufsp         | 2.41496    | 2.39721   | -0.0106404    | 0.956846  | 0.987617  |
| Rwdd1_j2      | 0.1901     | 0.143591  | 0             | 1         | 1         |
| Fam26d        | 1.39907    | 1.04703   | -0.418174     | 0.0315914 | 0.192235  |
| Dse           | 1.81172    | 1.56344   | 0             | 1         | 1         |
| AK038624_j2   | 13.4835    | 0         | 0             | 1         | 1         |
| Nt5dc1        | 0.188678   | 0.169924  | -0.151038     | 0.804341  | 0.935135  |
| Nt5dc1        | 0.463113   | 0.50797   | 0.133381      | 0.69237   | 0.886118  |
| Nt5dc1        | 0.243297   | 0.181058  | -0.426264     | 0.466253  | 0.765976  |
| Marcks        | 6.58999    | 9.19692   | 0.480876      | 8.52E-06  | 0.0002695 |
| 1700025K23Rik | 6.68508    | 6.59708   | -0.0191183    | 0.926503  | 0.977218  |
| 1700025K23Rik | 1.46848    | 1.28091   | -0.197153     | 0.680097  | 0.879617  |
| Wisp3_j2      | 0.0970144  | 0         | -1.79769e+308 | 0.036965  | 1         |
| XLOC_002715   | 0.379223   | 0.195388  | -0.956704     | 0.0207026 | 0.144261  |
| XLOC_002715   | 0.147212   | 0.115181  | -0.354        | 0.473304  | 0.770096  |
| Gm16365_j5    | 1.62901    | 1.04086   | 0             | 1         | 1         |
| Gm16365_j4    | 1.05671    | 0.816317  | 0             | 1         | 1         |
| E130307A14Rik | 0.611089   | 0.464668  | -0.39518      | 0.0973917 | 0.385743  |
| AK164126_j4   | 1.73523    | 1.44452   | -0.264535     | 0.305185  | 0.650262  |
| AA474331_j6   | 0.19025    | 0.312199  | 0.71457       | 0.148058  | 0.476816  |
| AA474331      | 1.23514    | 0.442187  | -1.48194      | 1.30E-05  | 0.000388  |
| AA474331_j4   | 0.683783   | 1.15407   | 0.75512       | 0.0087174 | 0.0773614 |
| Al317395_j1   | 0.279398   | 0.370466  | 0.407018      | 0.376528  | 0.708503  |
| Al317395_j2   | 0.00343015 | 0.267707  | 6.28624       | 0.0880029 | 0.363206  |
| Slc16a10_j3   | 0.157641   | 0.0227899 | -2.79018      | 0.0985408 | 0.388048  |
| Slc16a10      | 0.0967694  | 0.217558  | 1.16878       | 0.0915379 | 0.371836  |
| Rpf2_j3       | 0.397557   | 0         | 0             | 1         | 1         |
| Rpf2_j2       | 4.02492    | 3.52871   | 0             | 1         | 1         |
| Amd2_j1       | 0.1509     | 0.0885792 | -0.768552     | 0.423701  | 0.739059  |

|               |           |                 |            |           |          |
|---------------|-----------|-----------------|------------|-----------|----------|
| Cdc40         | 2.65858   | 2.53414         | 0          | 1         | 1        |
| Fig4          | 19.9766   | 17.5468         | -0.187107  | 0.0533134 | 0.268707 |
| Ccdc162_j2    | 0.310075  | 0.232821        | -0.413392  | 0.482783  | 0.77583  |
| Ccdc162_j3    | 0.0507407 | 0.148791        | 1.55208    | 0.177783  | 1        |
| Ccdc162_j4    | 0.240865  | 0.0253673       | -3.24718   | 0.0170494 | 0.126012 |
| Ccdc162_j12   | 0.585714  | 0.644943        | 0.138976   | 0.681072  | 0.880154 |
| Armc2_j2      | 0.190921  | 0.149727        | -0.350642  | 0.566554  | 0.824551 |
| Armc2         | 0.175098  | 0.105947        | -0.724813  | 0.19929   | 0.542218 |
| Armc2_j4      | 0.198811  | 0.395193        | 0.99116    | 0.144517  | 0.471765 |
| Foxo3_j1      | 4.00426   | 3.38414         | 0          | 1         | 1        |
| Foxo3         | 3.60551   | 3.54129         | 0          | 1         | 1        |
| Lace1_j1      | 0.413717  | 0.816808        | 0          | 1         | 1        |
| Lace1         | 2.34921   | 1.91228         | 0          | 1         | 1        |
| Lace1_j2      | 0.928742  | 0.674541        | 0          | 1         | 1        |
| Qrsl1         | 8.14356   | 7.39336         | -0.139429  | 0.237378  | 0.584096 |
| Lin28b_j8     | 0.0708454 | 0 -1.79769e+308 |            | 0.000677  | 1        |
| Lin28b_j9     | 0.100611  | 0.085189        | -0.240043  | 0.710997  | 1        |
| Lin28b_j10    | 0.116153  | 0.00161901      | -6.16477   | 0.152047  | 1        |
| Grik2_j2      | 0.572264  | 0.546675        | 0          | 1         | 1        |
| Gopc          | 16.0903   | 15.6957         | -0.0358169 | 0.703065  | 0.891251 |
| Gm9766_j2     | 1.33558   | 0.703101        | 0          | 1         | 1        |
| Gm9766_j1     | 1.11621   | 1.23716         | 0          | 1         | 1        |
| Mcm9_j2       | 0.213927  | 0.151724        | -0.495665  | 0.299934  | 0.646531 |
| Fam184a_j3    | 1.37504   | 1.08793         | 0          | 1         | 1        |
| Fam184a_j2    | 0.700279  | 0.620349        | 0          | 1         | 1        |
| Fam184a_j4    | 0.158563  | 0.0950715       | 0          | 1         | 1        |
| Man1a         | 0.931147  | 2.31804         | 1.31582    | 8.44E-15  | 1.62E-12 |
| D630037F22Rik | 1.58921   | 1.35285         | -0.232307  | 0.138095  | 0.462045 |
| Serinc1       | 89.5337   | 86.0812         | 0          | 1         | 1        |
| Sept10        | 0.944145  | 1.00695         | 0.0929125  | 0.658816  | 0.870342 |
| Ccdc109a_j1   | 6.03545   | 6.04842         | 0          | 1         | 1        |
| Ccdc109a      | 2.42042   | 2.67834         | 0          | 1         | 1        |
| Ddit4         | 6.75182   | 5.98763         | -0.17329   | 0.32431   | 0.667432 |
| Anapc16       | 13.105    | 15.5466         | 0.246484   | 0.0335298 | 0.200119 |
| Chst3_j5      | 0.182838  | 4.38E-05        | -12.0275   | 0.89627   | 0.967019 |
| Chst3         | 0.23336   | 0.199982        | -0.222687  | 0.574791  | 0.828142 |
| Slc29a3       | 1.17459   | 1.27269         | 0          | 1         | 1        |
| Slc29a3_j2    | 1.1713    | 1.22631         | 0          | 1         | 1        |
| Unc5b         | 0.201314  | 0 -1.79769e+308 |            | 3.46E-08  | 2.14E-06 |
| Unc5b         | 0.962725  | 0.809349        | -0.250361  | 0.25537   | 0.603928 |
| Sgpl1_j3      | 6.66159   | 9.08368         | 0          | 1         | 1        |
| Sgpl1         | 5.58638   | 6.23775         | 0          | 1         | 1        |
| Sgpl1         | 1.10663   | 3.09712         | 0          | 1         | 1        |
| Sgpl1_j2      | 2.92206   | 0.812064        | 0          | 1         | 1        |
| Adamts14_j2   | 0.0620933 | 0.146989        | 1.2432     | 0.110196  | 1        |
| X99384_j3     | 1.19374   | 0.938183        | 0          | 1         | 1        |
| X99384_j4     | 0.358159  | 0.144944        | 0          | 1         | 1        |

|                  |           |            |            |           |           |
|------------------|-----------|------------|------------|-----------|-----------|
| X99384           | 1.22097   | 0.939599   | 0          | 1         | 1         |
| Eif4ebp2         | 7.29949   | 7.8414     | 0.103314   | 0.301866  | 0.648067  |
| H2afy2           | 1.972     | 2.03945    | 0.0485275  | 0.75708   | 0.916197  |
| Col13a1_j6       | 0.0308347 | 0.113949   | 1.88576    | 0.206232  | 1         |
| Col13a1_j9       | 0.138917  | 0.0759823  | -0.870487  | 0.338033  | 0.678523  |
| 2010107G23Rik_j1 | 2.31602   | 2.08421    | 0          | 1         | 1         |
| 2010107G23Rik    | 6.89342   | 6.97603    | 0          | 1         | 1         |
| 2010107G23Rik    | 8.35509   | 7.48608    | 0          | 1         | 1         |
| Tspan15          | 14.762    | 17.2025    | 0.220732   | 0.0218035 | 0.149581  |
| Hk1_j6           | 8.14766   | 5.15539    | 0          | 1         | 1         |
| Hk1_j7           | 0.224839  | 0.410062   | 0          | 1         | 1         |
| Hk1              | 17.1626   | 14.5814    | 0          | 1         | 1         |
| Hk1_j8           | 2.89949   | 2.3108     | 0          | 1         | 1         |
| Supv3l1_j3       | 0.673817  | 0.574663   | 0          | 1         | 1         |
| Supv3l1          | 0.4126    | 0.183181   | 0          | 1         | 1         |
| Vps26a           | 20.3753   | 19.0447    | 0          | 1         | 1         |
| Srgn_j1          | 5.05094   | 6.36734    | 0.334138   | 0.0562049 | 0.277404  |
| 2510003E04Rik    | 32.3909   | 32.6007    | 0.00931552 | 0.918835  | 0.974658  |
| Ddx21            | 3.80454   | 4.00148    | 0          | 1         | 1         |
| Ddx50_j3         | 0.0979889 | 0.0302767  | 0          | 1         | 1         |
| Stox1_j2         | 0.0961295 | 0.100222   | 0.0601445  | 0.948217  | 1         |
| Ccar1_j5         | 2.41156   | 3.89074    | 0          | 1         | 1         |
| Ccar1            | 5.00707   | 4.36907    | 0          | 1         | 1         |
| Sirt1_j1         | 1.44276   | 1.92005    | 0.41231    | 0.0977009 | 0.386277  |
| Sirt1            | 2.19945   | 1.85298    | -0.247298  | 0.197011  | 0.539845  |
| Lrrtm3           | 1.56071   | 2.34709    | 0.588675   | 0.000299  | 0.0053343 |
| Reep3            | 4.98686   | 4.79888    | -0.0554328 | 0.640538  | 0.861161  |
| Nrbf2_j1         | 8.85479   | 10.4606    | 0          | 1         | 1         |
| Ado              | 5.83748   | 5.43724    | -0.10247   | 0.378421  | 0.710052  |
| Zfp365_j1        | 2.31866   | 0.00109898 | 0          | 1         | 1         |
| Zfp365           | 10.4828   | 7.54622    | 0          | 1         | 1         |
| Arid5b_j1        | 1.56003   | 1.45536    | 0          | 1         | 1         |
| Arid5b           | 1.44189   | 1.23293    | 0          | 1         | 1         |
| Arid5b           | 0.671276  | 0.699774   | 0          | 1         | 1         |
| AK044689_j1      | 0.102598  | 0.120112   | 0.227381   | 0.804001  | 1         |
| AK044689         | 0.579917  | 0.429907   | -0.431822  | 0.123732  | 0.438193  |
| Cdk1             | 0.823402  | 0.953237   | 0.211237   | 0.48923   | 0.779561  |
| Phyhipl          | 8.85367   | 8.07115    | 0          | 1         | 1         |
| Phyhipl_j2       | 39.168    | 41.5939    | 0          | 1         | 1         |
| Bicc1            | 0.77663   | 0.790243   | 0          | 1         | 1         |
| Bicc1            | 0.119395  | 0.00371574 | 0          | 1         | 1         |
| Tfam             | 5.67898   | 4.70125    | -0.272588  | 0.0243669 | 0.161438  |
| Ube2d1_j1        | 12.828    | 14.8161    | 0          | 1         | 1         |
| Ube2d1           | 13.1273   | 12.4735    | 0          | 1         | 1         |
| Cisd1            | 35.8455   | 32.3382    | -0.14855   | 0.162533  | 0.498004  |
| Cisd1_j2         | 68.2195   | 65.2307    | -0.0646337 | 0.573157  | 0.827443  |
| 1110038D17Rik    | 7.96514   | 7.8798     | 0          | 1         | 1         |

|               |           |           |               |           |           |
|---------------|-----------|-----------|---------------|-----------|-----------|
| Al646023_j1   | 8.55939   | 10.5929   | 0             | 1         | 1         |
| Al646023      | 4.09838   | 4.21951   | 0             | 1         | 1         |
| Susd2_j6      | 9.19527   | 11.0105   | 0.259922      | 0.0235127 | 0.157319  |
| Cabin1_j2     | 3.38393   | 3.59824   | 0             | 1         | 1         |
| Cabin1        | 3.70738   | 3.7088    | 0             | 1         | 1         |
| Ddt           | 41.7653   | 42.1698   | 0.0139057     | 0.900228  | 0.968284  |
| Gstt3         | 1.31201   | 1.23136   | -0.0915218    | 0.685999  | 0.882933  |
| Gstt1         | 9.32374   | 9.4431    | 0.0183516     | 0.903988  | 0.969335  |
| Gstt2         | 0.931679  | 0.792457  | -0.233502     | 0.47178   | 0.769131  |
| Gstt2_j1      | 0.137646  | 0.0394476 | -1.80295      | 0.293413  | 0.640286  |
| Mif_j2        | 24.8789   | 25.7679   | 0.0506515     | 0.729131  | 0.903998  |
| Mif           | 1.08195   | 0.545554  | -0.987835     | 0.0777999 | 0.337708  |
| Smarchb1      | 2.70952   | 3.78639   | 0.482783      | 0.0110004 | 0.0919287 |
| Smarchb1      | 4.32184   | 4.46261   | 0.0462427     | 0.782675  | 0.926648  |
| Mmp11         | 0.713693  | 0.796255  | 0.157929      | 0.618712  | 0.850231  |
| Prmt2         | 7.85807   | 7.68404   | -0.0323103    | 0.818563  | 0.941149  |
| Prmt2         | 25.8172   | 31.2429   | 0.275196      | 0.0034932 | 0.0388803 |
| Pcnt_j1       | 1.64926   | 1.54002   | 0             | 1         | 1         |
| Pcnt_j2       | 0.239578  | 0.135242  | 0             | 1         | 1         |
| Ybey          | 0.165423  | 0.615943  | 1.89664       | 5.46E-07  | 2.44E-05  |
| Col6a2        | 1.40806   | 1.81946   | 0             | 1         | 1         |
| Col6a1        | 1.80912   | 2.59365   | 0.519696      | 0.0020423 | 0.0253943 |
| Pcbp3_j4      | 47.1944   | 57.0564   | 0             | 1         | 1         |
| Pcbp3_j16     | 0.0923484 | 0         | 0             | 1         | 1         |
| Pcbp3_j17     | 1.01495   | 1.98151   | 0             | 1         | 1         |
| Pcbp3_j18     | 37.9027   | 32.2998   | 0             | 1         | 1         |
| Col18a1       | 0.494021  | 0.390915  | -0.33772      | 0.141727  | 0.468312  |
| Gm10941       | 0.0938463 | 0.0391128 | -1.26266      | 0.373856  | 1         |
| Adarb1        | 1.46799   | 1.08161   | 0             | 1         | 1         |
| Adarb1        | 1.6066    | 1.94147   | 0             | 1         | 1         |
| 1810008A18Rik | 9.63268   | 10.4361   | 0.115577      | 0.316491  | 0.660085  |
| Lrrc3_j1      | 0.53988   | 7.03E-05  | 0             | 1         | 1         |
| Lrrc3         | 3.80286   | 3.60338   | 0             | 1         | 1         |
| Trpm2         | 3.53563   | 2.20688   | -0.67996      | 1.97E-06  | 7.49E-05  |
| Pfkl          | 0.176011  | 0.268694  | 0.610294      | 0.124658  | 0.43989   |
| D10Jhu81e_j1  | 4.89464   | 4.42296   | -0.146189     | 0.208369  | 0.552338  |
| D10Jhu81e_j3  | 0.862993  | 0.178792  | -2.27107      | 0.0442453 | 0.239879  |
| Pwp2_j1       | 1.39224   | 1.3775    | 0             | 1         | 1         |
| Pwp2          | 3.64091   | 3.39138   | 0             | 1         | 1         |
| Trappc10_j1   | 15.8764   | 14.3031   | -0.150557     | 0.0994375 | 0.390325  |
| Trappc10      | 1.98215   | 1.38612   | -0.516012     | 0.0028368 | 0.0329294 |
| Agpat3_j2     | 0.330198  | 0.116666  | -1.50095      | 0.003494  | 0.0388804 |
| Agpat3_j3     | 0.293291  | 0.449128  | 0.614795      | 0.0671095 | 0.309734  |
| Agpat3_j4     | 0.112476  | 0         | -1.79769e+308 | 1.51E-05  | 1         |
| Rrp1_j4       | 1.90597   | 0         | 0             | 1         | 1         |
| Rrp1          | 9.69244   | 9.9254    | 0             | 1         | 1         |
| Pdxk          | 6.00893   | 5.576     | -0.10788      | 0.32382   | 0.666883  |

|                  |           |                 |              |           |           |
|------------------|-----------|-----------------|--------------|-----------|-----------|
| Syde1            | 0.138867  | 0.103219        | 0            | 1         | 1         |
| Ccdc105_j1       | 0.134346  | 0.0645711       | -1.057       | 0.178438  | 1         |
| 2610008E11Rik    | 2.39041   | 3.23588         | 0            | 1         | 1         |
| Ppap2c           | 5.97305   | 7.12058         | 0            | 1         | 1         |
| Ppap2c_j1        | 2.32861   | 2.75319         | 0            | 1         | 1         |
| Mier2            | 4.80055   | 5.87898         | 0            | 1         | 1         |
| Polrmt           | 5.04502   | 4.45268         | -0.180186    | 0.152025  | 0.483426  |
| Rnf126           | 11.1298   | 9.97708         | 0            | 1         | 1         |
| BC005764_j1      | 0.473026  | 0.250141        | -0.919178    | 0.0792925 | 0.341916  |
| BC005764         | 3.32804   | 4.78369         | 0.523455     | 0.0007137 | 0.0108992 |
| Med16_j1         | 7.60617   | 8.87958         | 0            | 1         | 1         |
| Med16            | 0.703727  | 0.128821        | 0            | 1         | 1         |
| C030046I01Rik_j1 | 28.27     | 27.7323         | -0.0277017   | 0.802349  | 0.934274  |
| C030046I01Rik    | 5.99568   | 6.64232         | 0.147766     | 0.214623  | 0.560036  |
| ORF61            | 10.3373   | 14.0147         | 0.439083     | 0.0010818 | 0.0152025 |
| ORF61            | 42.3082   | 44.3657         | 0.0685069    | 0.466099  | 0.765927  |
| Polr2e           | 27.0363   | 27.0328         | -0.000185601 | 0.998615  | 0.999415  |
| Sbno2_j5         | 0.256975  | 0.487792        | 0            | 1         | 1         |
| Dos_j1           | 0.118573  | 0.0301403       | 0            | 1         | 1         |
| Gamt             | 20.5112   | 17.3164         | -0.244271    | 0.0397602 | 0.222986  |
| 2310011J03Rik    | 16.4741   | 18.264          | 0.148802     | 0.0938848 | 0.37753   |
| Pcsk4_j7         | 0.319589  | 0.194556        | -0.716032    | 0.465124  | 0.765045  |
| Adamts15_j2      | 0.613378  | 0.712704        | 0.216526     | 0.433374  | 0.744767  |
| Mex3d            | 6.81747   | 9.12149         | 0.420033     | 0.0004578 | 0.0075641 |
| Mbd3             | 30.1612   | 33.1921         | 0.138146     | 0.177127  | 0.516263  |
| Mbd3_j1          | 1.9585    | 2.34366         | 0.259016     | 0.0821338 | 0.349173  |
| Tcf3             | 1.50815   | 0.787842        | 0            | 1         | 1         |
| Atp8b3_j1        | 0.170099  | 0 -1.79769e+308 | 0.0051041    | 0.0515156 |           |
| Atp8b3_j2        | 0.056178  | 1.84E-05        | -11.5755     | 0.98637   | 1         |
| Rexo1_j3         | 3.5518    | 3.31308         | 0            | 1         | 1         |
| Rexo1            | 3.19011   | 2.81841         | 0            | 1         | 1         |
| Fam108a_j1       | 1.80358   | 1.92302         | 0.0925091    | 0.683284  | 0.881397  |
| Fam108a_j3       | 1.17795   | 1.69016         | 0.52088      | 0.162453  | 0.497967  |
| Fam108a_j4       | 2.42852   | 3.11179         | 0.357665     | 0.191054  | 0.533209  |
| Btbd2_j2         | 10.9572   | 8.60589         | 0            | 1         | 1         |
| Btbd2            | 2.5079    | 2.77128         | 0            | 1         | 1         |
| Mknk2            | 3.49498   | 3.80775         | 0            | 1         | 1         |
| Mknk2_j1         | 6.56704   | 7.4386          | 0            | 1         | 1         |
| Mobkl2a_j2       | 0.21499   | 0 -1.79769e+308 | 7.00E-05     | 0.0015845 |           |
| Mobkl2a          | 1.79362   | 1.95842         | 0.126812     | 0.396769  | 0.721313  |
| Ap3d1_j5         | 27.3837   | 29.098          | 0            | 1         | 1         |
| Ap3d1            | 23.4918   | 20.6289         | 0            | 1         | 1         |
| Plekhj1_j1       | 1.58091   | 2.21378         | 0.485759     | 0.0004246 | 0.0071077 |
| Plekhj1          | 2.14222   | 2.60169         | 0.280345     | 0.0202925 | 0.142299  |
| Jsrp1_j2         | 0.146265  | 0.207753        | 0.506283     | 0.505907  | 0.78857   |
| Jsrp1_j1         | 0.0506774 | 0.0903314       | 0.833885     | 0.589169  | 1         |
| Lingo3           | 1.46124   | 0.748909        | -0.964335    | 9.94E-06  | 0.0003083 |

|               |           |           |               |           |           |
|---------------|-----------|-----------|---------------|-----------|-----------|
| Lsm7_j2       | 2.11422   | 1.6278    | -0.377201     | 0.16838   | 0.505047  |
| Timm13_j1     | 0.527853  | 0.598875  | 0.182118      | 0.473729  | 0.7701    |
| Timm13_j3     | 0.571546  | 0.457433  | -0.32131      | 0.70274   | 0.891161  |
| Gng7          | 5.25436   | 3.91826   | -0.423302     | 0.001444  | 0.0191414 |
| Diras1        | 45.2151   | 36.4883   | 0             | 1         | 1         |
| Sgta_j1       | 3.45987   | 3.54974   | 0             | 1         | 1         |
| Sgta          | 20.2972   | 22.6216   | 0             | 1         | 1         |
| Pias4         | 12.8358   | 13.2875   | 0.0498984     | 0.642219  | 0.862006  |
| Atcay_j3      | 6.99536   | 9.94718   | 0             | 1         | 1         |
| Atcay         | 16.2558   | 14.1741   | 0             | 1         | 1         |
| Hmg20b_j1     | 0.152299  | 0         | 0             | 1         | 1         |
| Hmg20b        | 5.30077   | 8.26379   | 0             | 1         | 1         |
| Hmg20b_j4     | 3.28233   | 2.6965    | 0             | 1         | 1         |
| Fzr1          | 10.7058   | 9.68456   | -0.14463      | 0.159466  | 0.493951  |
| Nfic_j2       | 0.1142    | 0         | 0             | 1         | 1         |
| Nfic          | 26.6529   | 19.7919   | 0             | 1         | 1         |
| Nfic          | 9.12877   | 7.21328   | 0             | 1         | 1         |
| Celf5_j8      | 0.600386  | 0.655285  | 0             | 1         | 1         |
| Celf5         | 0.3058    | 0.262037  | 0             | 1         | 1         |
| Celf5_j3      | 0.449245  | 0.37354   | 0             | 1         | 1         |
| Ncln          | 9.63735   | 9.51477   | 0             | 1         | 1         |
| Gna11         | 19.6754   | 19.6513   | 0             | 1         | 1         |
| Sirt6_j2      | 0.578514  | 0.65696   | 0.183454      | 0.688247  | 0.884104  |
| Sirt6         | 8.07208   | 9.54421   | 0.241685      | 0.0747963 | 0.329991  |
| AK136722_j2   | 0.450666  | 0.421597  | -0.0961924    | 0.84572   | 0.951231  |
| XLOC_002912   | 0.0880405 | 0         | -1.79769e+308 | 0.0005733 | 1         |
| 1190007I07Rik | 0.470218  | 0.2966    | -0.664813     | 0.540346  | 0.80885   |
| 1190007I07Rik | 1.84098   | 1.66752   | -0.142766     | 0.637011  | 0.859465  |
| Glt8d2        | 0.325173  | 0.188876  | -0.783769     | 0.0169755 | 0.1256    |
| Nfyb_j2       | 3.18755   | 2.5469    | 0             | 1         | 1         |
| Nfyb          | 4.11959   | 4.84232   | 0             | 1         | 1         |
| Slc41a2_j2    | 0.15333   | 0         | 0             | 1         | 1         |
| Slc41a2_j1    | 0.0766712 | 0         | 0             | 1         | 1         |
| Slc41a2       | 2.83992   | 1.21976   | 0             | 1         | 1         |
| Aldh1l2_j2    | 0.0888999 | 0.0388919 | -1.19271      | 0.082144  | 1         |
| Aldh1l2       | 0.443276  | 0.430173  | -0.043289     | 0.852439  | 0.953251  |
| Appl2         | 7.42175   | 6.82813   | 0             | 1         | 1         |
| Nuak1_j2      | 6.56046   | 3.72654   | 0             | 1         | 1         |
| Nuak1         | 0         | 0.236409  | 0             | 1         | 1         |
| Ckap4_j1      | 4.49211   | 5.76422   | 0             | 1         | 1         |
| Ckap4         | 8.65857   | 9.02754   | 0             | 1         | 1         |
| Mterfd3_j2    | 0.735709  | 0.869942  | 0             | 1         | 1         |
| Mterfd3       | 3.98652   | 3.60744   | 0             | 1         | 1         |
| Cry1_j1       | 1.19283   | 1.20336   | 0             | 1         | 1         |
| Cry1          | 2.61578   | 1.89566   | 0             | 1         | 1         |
| Prdm4         | 7.23623   | 5.84562   | 0             | 1         | 1         |
| D10Wsu52e     | 48.5443   | 48.2245   | -0.00953589   | 0.916311  | 0.973929  |



|                  |           |                 |            |           |          |
|------------------|-----------|-----------------|------------|-----------|----------|
| Syn3_j1          | 1.20689   | 1.07732         | 0          | 1         | 1        |
| Hsp90b1_j2       | 18.3292   | 22.3797         | 0          | 1         | 1        |
| Hsp90b1_j3       | 0.110469  | 0.0899319       | 0          | 1         | 1        |
| Dram1_j4         | 0.0761282 | 0 -1.79769e+308 | 0.0127446  |           | 1        |
| Dram1_j5         | 0.0520939 | 0 -1.79769e+308 | 0.133849   |           | 1        |
| Chpt1            | 0.132953  | 0.146843        | 0.143356   | 0.759367  | 1        |
| Chpt1_j1         | 0.283157  | 0.163466        | -0.792609  | 0.054156  | 0.271275 |
| Chpt1_j3         | 1.04064   | 0.986676        | -0.0768178 | 0.784367  | 0.927501 |
| Utp20_j1         | 0.0634271 | 0.131838        | 0          | 1         | 1        |
| Utp20            | 0.555023  | 0.460661        | 0          | 1         | 1        |
| Ano4_j7          | 1.47502   | 1.36769         | 0          | 1         | 1        |
| Gas2l3_j5        | 0.09106   | 0               | 0          | 1         | 1        |
| Gas2l3           | 0.563842  | 0.454682        | 0          | 1         | 1        |
| Slc17a8_j1       | 0.0891571 | 0 -1.79769e+308 | 0.0012728  |           | 1        |
| Slc17a8          | 0.776381  | 0.557199        | -0.478572  | 0.0763113 | 0.333774 |
| Scyl2_j2         | 0.144008  | 0               | 0          | 1         | 1        |
| Scyl2_j4         | 0.031867  | 0.0719934       | 0          | 1         | 1        |
| Actr6            | 1.92262   | 1.45634         | -0.40073   | 0.139917  | 0.465344 |
| Apaf1            | 0.30268   | 0.356117        | 0          | 1         | 1        |
| Apaf1            | 0.23657   | 0.276772        | 0          | 1         | 1        |
| Apaf1_j4         | 0.168059  | 0.175216        | 0          | 1         | 1        |
| Slc25a3          | 53.5876   | 56.8586         | 0          | 1         | 1        |
| Tmpo             | 0.738111  | 0.987111        | 0          | 1         | 1        |
| Tmpo             | 0.727123  | 0.675977        | 0          | 1         | 1        |
| Tmpo             | 0.941145  | 1.0019          | 0          | 1         | 1        |
| Tmpo             | 0.95597   | 0.469378        | 0          | 1         | 1        |
| Rmst_j4          | 0.0735647 | 0.189029        | 1.36152    | 0.252432  | 0.600447 |
| Nedd1            | 0.890241  | 0.891043        | 0.00130011 | 0.995472  | 0.998731 |
| BC065048_j4      | 0.147484  | 0.168988        | 0.196368   | 0.816652  | 0.940333 |
| XLOC_002952      | 0.238036  | 0.0713377       | -1.73845   | 0.132973  | 0.453791 |
| Elk3             | 2.62972   | 3.54833         | 0.432229   | 0.0018046 | 0.023038 |
| Snrpf_j1         | 0.0746575 | 0.0282072       | -1.40423   | 0.479202  | 1        |
| Metap2_j1        | 4.6286    | 4.88205         | 0          | 1         | 1        |
| Vezt             | 2.18832   | 3.67069         | 0          | 1         | 1        |
| Vezt_j8          | 4.31835   | 5.12445         | 0          | 1         | 1        |
| 4932415G12Rik    | 0.605162  | 0.499618        | -0.276496  | 0.279574  | 0.628297 |
| 4932415G12Rik_j4 | 0.175643  | 0.00504948      | -5.12037   | 0.0185266 | 0.133706 |
| Plxnc1_j5        | 19.0606   | 18.0603         | 0          | 1         | 1        |
| Plxnc1           | 12.6646   | 10.3205         | 0          | 1         | 1        |
| Cradd            | 0.325103  | 0.278531        | -0.223059  | 0.673663  | 0.877015 |
| Cradd_j1         | 0.756746  | 0.695156        | -0.122474  | 0.744362  | 0.910803 |
| Socs2            | 5.34855   | 5.18752         | 0          | 1         | 1        |
| Mrpl42_j4        | 0.514242  | 0.258288        | -0.993465  | 0.314943  | 0.659055 |
| Mrpl42_j5        | 1.90001   | 1.72487         | -0.139521  | 0.742414  | 0.909901 |
| Nudt4_j2         | 13.5514   | 13.5066         | 0          | 1         | 1        |
| Nudt4            | 23.0724   | 23.6477         | 0          | 1         | 1        |
| Tmtc3_j2         | 1.57036   | 2.31103         | 0          | 1         | 1        |

|               |          |                 |            |           |           |
|---------------|----------|-----------------|------------|-----------|-----------|
| Tmtc3_j3      | 0.755065 | 5.32E-05        | 0          | 1         | 1         |
| Tmtc3         | 1.05504  | 0.206805        | 0          | 1         | 1         |
| 4930430F08Rik | 7.07049  | 6.53817         | -0.112924  | 0.398926  | 0.72264   |
| Nts           | 26.3234  | 95.4057         | 1.85773    | 0         | 0         |
| Lrriq1_j2     | 0.204734 | 0.112799        | -0.86      | 0.051275  | 0.262334  |
| Tmtc2_j4      | 4.28113  | 3.8889          | -0.138629  | 0.292599  | 0.639603  |
| Tmtc2         | 0.692479 | 0.628716        | -0.139363  | 0.511675  | 0.79169   |
| BC067068      | 0.372621 | 0.348562        | -0.0962955 | 0.838344  | 0.948494  |
| Acss3_j5      | 0.138164 | 0.0654779       | -1.0773    | 0.370511  | 0.703609  |
| XLOC_002980   | 0.130048 | 0 -1.79769e+308 |            | 0.0223243 | 1         |
| Syt1_j1       | 1.72543  | 3.98541         | 0          | 1         | 1         |
| Syt1_j7       | 1.31383  | 0               | 0          | 1         | 1         |
| Nav3_j6       | 0.328242 | 0.00397581      | -6.36737   | 0.0026316 | 0.031065  |
| Nav3_j7       | 0.212479 | 0.162265        | -0.388973  | 0.276003  | 0.624922  |
| Zdhhc17_j7    | 5.09928  | 7.76706         | 0          | 1         | 1         |
| Zdhhc17       | 7.72264  | 6.41936         | 0          | 1         | 1         |
| Zdhhc17_j2    | 8.43789  | 5.49705         | 0          | 1         | 1         |
| XLOC_002988   | 0.352663 | 0.221769        | -0.669231  | 0.487196  | 0.778145  |
| Atxn7l3b      | 32.4005  | 33.835          | 0.0624985  | 0.472232  | 0.769316  |
| Trhde_j1      | 0.533361 | 0.396922        | -0.426258  | 0.119929  | 0.431165  |
| Trhde         | 0.312121 | 0.245202        | -0.348132  | 0.339593  | 0.679866  |
| Tph2_j3       | 0.434932 | 0.438389        | 0.0114216  | 0.980777  | 0.994152  |
| Tbc1d15       | 9.58893  | 8.3787          | -0.194644  | 0.0844505 | 0.354727  |
| Rab21         | 6.67787  | 6.22703         | 0          | 1         | 1         |
| Tmem19_j4     | 1.07508  | 1.0917          | 0          | 1         | 1         |
| Lgr5          | 2.216    | 1.55553         | 0          | 1         | 1         |
| Kcnmb4        | 18.5798  | 24.0154         | 0.370221   | 0.0027009 | 0.0317748 |
| Cnot2_j7      | 1.96969  | 1.74759         | 0          | 1         | 1         |
| Cnot2_j8      | 1.88548  | 1.97022         | 0          | 1         | 1         |
| Cnot2         | 1.55495  | 1.7392          | 0          | 1         | 1         |
| Rab3ip        | 2.5902   | 1.39876         | 0          | 1         | 1         |
| Rab3ip        | 4.99522  | 4.98544         | 0          | 1         | 1         |
| Cct2          | 87.701   | 95.5862         | 0.124209   | 0.14872   | 0.477528  |
| Frs2_j2       | 0.780704 | 0.397485        | 0          | 1         | 1         |
| Frs2_j3       | 0.2902   | 0               | 0          | 1         | 1         |
| Frs2          | 2.86423  | 2.55262         | 0          | 1         | 1         |
| Yeats4        | 13.4923  | 14.7807         | 0.13157    | 0.250405  | 0.598108  |
| Lyz2          | 11.277   | 22.7449         | 0          | 1         | 1         |
| Cpsf6_j1      | 3.93227  | 3.15293         | -0.318672  | 0.0211559 | 0.146415  |
| Cpsf6         | 0.450106 | 0.523775        | 0.218684   | 0.476222  | 0.77201   |
| Cpsf6         | 0.790964 | 0.2438          | -1.69792   | 3.52E-06  | 0.0001244 |
| Mdm2_j3       | 2.81886  | 3.72679         | 0          | 1         | 1         |
| Mdm2_j4       | 1.48528  | 1.75038         | 0          | 1         | 1         |
| Mdm2          | 3.15684  | 3.57399         | 0          | 1         | 1         |
| Slc35e3_j3    | 0.145029 | 0.0685006       | -1.08216   | 0.300375  | 0.646996  |
| Nup107        | 5.91944  | 5.21702         | -0.182235  | 0.160679  | 0.495357  |
| Rap1b         | 23.0347  | 24.9727         | 0          | 1         | 1         |

|             |             |                 |            |           |           |
|-------------|-------------|-----------------|------------|-----------|-----------|
| Dyrk2       | 0.430698    | 0.431257        | 0.00187052 | 0.995362  | 0.998726  |
| Dyrk2_j3    | 0.0732158   | 0.0972416       | 0.40942    | 0.542997  | 1         |
| Dyrk2_j2    | 0.327683    | 0 -1.79769e+308 |            | 1.21E-11  | 1.44E-09  |
| Cand1       | 16.389      | 13.4144         | 0          | 1         | 1         |
| AK135691_j1 | 0.253572    | 0.117451        | -1.11034   | 0.0281846 | 0.178163  |
| Helb        | 0.1966      | 0.0397057       | -2.30784   | 0.0131197 | 0.104703  |
| Irak3       | 1.51074     | 2.23501         | 0.56502    | 0.0002328 | 0.0043457 |
| Msr3        | 1.62494     | 1.55458         | -0.0638636 | 0.744497  | 0.910838  |
| Msr3_j1     | 0.160416    | 0.117611        | -0.447792  | 0.526771  | 0.801217  |
| Lemd3       | 4.05949     | 3.94565         | -0.0410372 | 0.767132  | 0.920598  |
| Tbc1d30_j3  | 6.10358     | 6.68011         | 0          | 1         | 1         |
| Tbc1d30     | 2.1983      | 1.71865         | 0          | 1         | 1         |
| Rassf3_j1   | 1.77543     | 1.2336          | 0          | 1         | 1         |
| Rassf3      | 5.51504     | 3.94179         | 0          | 1         | 1         |
| Tbk1        | 16.5833     | 15.2047         | -0.125215  | 0.211217  | 0.555994  |
| Xpot_j6     | 1.51893     | 1.2512          | 0          | 1         | 1         |
| Xpot_j8     | 0.899958    | 0.864347        | -0.0582474 | 0.896506  | 0.967019  |
| Srgap1_j2   | 1.15029     | 1.44705         | 0          | 1         | 1         |
| Srgap1      | 4.10456     | 3.87416         | 0          | 1         | 1         |
| Tmem5       | 0.414223    | 0.440375        | 0.0883278  | 0.867346  | 0.958108  |
| Mon2_j5     | 2.89747     | 2.80059         | -0.0490649 | 0.797294  | 0.932581  |
| Mon2_j7     | 2.16858     | 1.94844         | -0.154431  | 0.360783  | 0.695583  |
| Mon2        | 2.11482     | 1.84537         | -0.196627  | 0.169784  | 0.506768  |
| Usp15       | 5.34425     | 5.15328         | -0.0524948 | 0.596602  | 0.839571  |
| Slc16a7_j5  | 0.257152    | 0.313139        | 0          | 1         | 1         |
| Slc16a7_j7  | 0.000274697 | 0.139027        | 0          | 1         | 1         |
| Slc16a7_j3  | 0.641572    | 0.411312        | 0          | 1         | 1         |
| Slc16a7_j6  | 0.33068     | 0.157132        | 0          | 1         | 1         |
| Xrcc6bp1_j1 | 1.05419     | 0.694828        | -0.601401  | 0.443063  | 0.751132  |
| Xrcc6bp1    | 0.824579    | 0.578415        | -0.511552  | 0.188539  | 0.530139  |
| Tsfm        | 12.4323     | 13.0254         | 0.067234   | 0.627265  | 0.854539  |
| March9      | 6.50394     | 5.98143         | -0.120824  | 0.332891  | 0.674     |
| Tspan31_j2  | 6.01862     | 9.09466         | 0          | 1         | 1         |
| Tspan31     | 32.449      | 31.7248         | 0          | 1         | 1         |
| Os9         | 9.42589     | 11.7901         | 0.322879   | 0.003306  | 0.0372314 |
| Slc26a10_j1 | 0.184744    | 0.18078         | -0.0312925 | 0.968657  | 0.9911    |
| Arhgef25_j4 | 22.8996     | 18.4403         | 0          | 1         | 1         |
| Dtx3_j6     | 11.9268     | 10.7202         | 0          | 1         | 1         |
| Pip4k2c     | 18.6573     | 17.1524         | -0.121326  | 0.212734  | 0.557725  |
| Kif5a_j12   | 108.459     | 122.983         | 0          | 1         | 1         |
| Kif5a       | 4.64411     | 3.77266         | 0          | 1         | 1         |
| Gli1_j2     | 0.226434    | 0.218216        | -0.0533341 | 0.918975  | 0.974676  |
| Gli1_j1     | 0.393317    | 0.421281        | 0.0990917  | 0.75267   | 0.914482  |
| Shmt2       | 7.15431     | 9.1562          | 0.355936   | 0.006569  | 0.0626667 |
| Nxph4       | 0.966613    | 1.12343         | 0.216904   | 0.386594  | 0.714571  |
| Lrp1_j6     | 0.938014    | 0.8811          | 0          | 1         | 1         |
| Lrp1        | 1.25303     | 1.08887         | 0          | 1         | 1         |

|            |           |           |              |           |           |
|------------|-----------|-----------|--------------|-----------|-----------|
| Lrp1_j9    | 1.36683   | 1.20173   | 0            | 1         | 1         |
| Nab2_j3    | 6.00832   | 5.60552   | 0            | 1         | 1         |
| Rbms2      | 1.47159   | 1.55746   | 0.0818221    | 0.544397  | 0.81114   |
| Spryd4     | 2.55386   | 2.69904   | 0            | 1         | 1         |
| Coq10a_j2  | 7.28741   | 6.86059   | 0            | 1         | 1         |
| Obfc2b     | 18.2241   | 25.3627   | 0            | 1         | 1         |
| Myl6_j3    | 72.4494   | 80.0187   | 0            | 1         | 1         |
| Myl6_j4    | 3.18747   | 1.03072   | 0            | 1         | 1         |
| Esyt1      | 71.085    | 93.0547   | 0            | 1         | 1         |
| Zc3h10_j2  | 1.70266   | 2.13128   | 0            | 1         | 1         |
| Zc3h10     | 3.25371   | 1.90937   | 0            | 1         | 1         |
| Rpl41      | 26.3435   | 33.8424   | 0            | 1         | 1         |
| Rpl41      | 31.9469   | 42.3662   | 0            | 1         | 1         |
| Pa2g4      | 11.3091   | 13.3501   | 0.239373     | 0.0285665 | 0.179787  |
| ErbB3_j1   | 4.81867   | 5.22457   | 0            | 1         | 1         |
| ErbB3      | 5.30432   | 4.99284   | 0            | 1         | 1         |
| Rps26_j1   | 1.2173    | 0.966203  | -0.33329     | 0.573107  | 0.827416  |
| Rps26      | 0.561002  | 0.386795  | -0.536438    | 0.566061  | 0.824301  |
| Ikzf4_j1   | 0.111892  | 0.05352   | -1.06395     | 0.230263  | 1         |
| Suox       | 6.14994   | 5.62536   | -0.128627    | 0.333332  | 0.674372  |
| Rab5b_j5   | 0.140396  | 0.0380908 | -1.88199     | 0.0975445 | 0.385892  |
| Cdk2       | 0.418327  | 0.507556  | 0.278937     | 0.468517  | 0.767098  |
| Cdk2       | 0.341274  | 0.252792  | -0.432981    | 0.416661  | 0.733896  |
| Dgka_j3    | 0.506542  | 1.71948   | 0            | 1         | 1         |
| Dgka_j4    | 0.168394  | 0.122319  | 0            | 1         | 1         |
| Dgka_j5    | 0.178824  | 0         | 0            | 1         | 1         |
| Dgka_j6    | 0.258758  | 0.141395  | 0            | 1         | 1         |
| Ormdl2     | 1.3692    | 1.52577   | 0            | 1         | 1         |
| Gdf11      | 8.89376   | 9.62441   | 0.113905     | 0.277444  | 0.62639   |
| Rdh5_j3    | 1.53777   | 1.61394   | 0.069745     | 0.798866  | 0.933125  |
| Rdh5_j6    | 0.0374112 | 0.0730726 | 0.96586      | 0.393089  | 1         |
| Rdh5_j5    | 0.753696  | 0.807089  | 0.0987446    | 0.74691   | 0.911809  |
| Vmn2r87_j1 | 0.126089  | 0.0603213 | -1.06371     | 0.39409   | 1         |
| Cnksr3_j1  | 0.562871  | 0.350845  | -0.681971    | 0.118622  | 0.428668  |
| Mtrf1l_j2  | 0         | 0.0555943 | 1.79769e+308 | 0.0292264 | 1         |
| Syne1_j3   | 0.0806146 | 0         | 0            | 1         | 1         |
| Rmnd1_j10  | 0.086655  | 0.135773  | 0.647836     | 0.5524    | 1         |
| Rmnd1_j12  | 0.427373  | 0.487757  | 0.190667     | 0.662001  | 0.871832  |
| Rmnd1_j19  | 0.766627  | 1.17554   | 0.616726     | 0.0111293 | 0.0927678 |
| Lrp11      | 29.2049   | 25.5286   | -0.194091    | 0.051077  | 0.261892  |
| Ppil4_j1   | 0.513537  | 0.773541  | 0.591009     | 0.0978643 | 0.386642  |
| Shprh_j3   | 0.0469737 | 0.189479  | 2.01211      | 0.0006376 | 0.0099645 |
| Epm2a_j1   | 0         | 0.436898  | 0            | 1         | 1         |
| Plagl1_j1  | 0.111287  | 0.33439   | 0            | 1         | 1         |
| Fuca2_j1   | 6.23433   | 7.00772   | 0.16871      | 0.438123  | 0.747937  |
| Hivep2_j1  | 1.64995   | 1.60814   | -0.0370245   | 0.807875  | 0.936731  |
| Reps1_j5   | 1.22686   | 0.895137  | 0            | 1         | 1         |

|                  |             |                      |             |           |           |
|------------------|-------------|----------------------|-------------|-----------|-----------|
| XLOC_002212      | 0.151688    | 0.136359             | -0.153695   | 0.907294  | 0.970702  |
| Map3k5_j1        | 0.120537    | 0.44124              | 0           | 1         | 1         |
| Mtap7_j4         | 0.000480837 | 0.0720512            | 0           | 1         | 1         |
| Mtap7_j5         | 0.542275    | 0.364936             | 0           | 1         | 1         |
| Mtap7_j7         | 4.01747     | 4.7497               | 0           | 1         | 1         |
| XLOC_002219      | 0.232933    | 0.152816             | -0.608125   | 0.64779   | 0.86433   |
| Fam54a_j1        | 0.0485575   | 0.0526978            | 0.118049    | 0.962097  | 1         |
| Fam54a_j3        | 0.0992606   | 0.0828653            | -0.260454   | 0.80954   | 1         |
| Hbs1l_j1         | 0.0705111   | 0.101423             | 0.52446     | 0.769238  | 1         |
| 1110021L09Rik_j5 | 0.718863    | 0.390721             | 0           | 1         | 1         |
| Moxd1_j4         | 3.13716     | 2.38553              | -0.39515    | 0.101627  | 0.395002  |
| Ctgf             | 1.08415     | 1.02143              | -0.0859788  | 0.739639  | 0.908677  |
| Med23_j1         | 0.116201    | 0 -1.79769e+308      |             | 8.78E-05  | 1         |
| Epb4.1l2_j2      | 1.74024     | 1.05151              | -0.726825   | 0.0132086 | 0.105239  |
| Epb4.1l2_j1      | 0.426606    | 0.53333              | 0.322126    | 0.411425  | 0.730688  |
| Epb4.1l2         | 4.37888     | 4.71408              | 0.106412    | 0.468464  | 0.767088  |
| Epb4.1l2_j7      | 1.2496      | 1.54487              | 0.306018    | 0.211418  | 0.556171  |
| 9330159F19Rik_j3 | 0.570857    | 0.406748             | 0           | 1         | 1         |
| Echdc1           | 4.58919     | 3.79474              | 0           | 1         | 1         |
| XLOC_002242      | 0.321665    | 0.241354             | -0.414405   | 0.61998   | 0.850928  |
| Bet3l_j1         | 10.1849     | 7.36715              | -0.467255   | 2.00E-05  | 0.0005554 |
| XLOC_002245      | 0.145739    | 0.100701             | 0           | 1         | 1         |
| XLOC_002245      | 0.200211    | 0.121743             | 0           | 1         | 1         |
| Tspyl4           | 29.0469     | 14.64                | 0           | 1         | 1         |
| Hs3st5           | 0           | 0.133803             | 0           | 1         | 1         |
| Hs3st5_j2        | 4.53448     | 3.4353               | 0           | 1         | 1         |
| Hdac2_j1         | 10.1836     | 20.0574              | 0           | 1         | 1         |
| Lama4_j2         | 1.43858     | 1.17581              | -0.290998   | 0.143163  | 0.470211  |
| Tube1_j1         | 0.818501    | 0.570802             | -0.519995   | 0.0956635 | 0.381847  |
| Fyn_j4           | 6.69645     | 6.38579              | 0           | 1         | 1         |
| Rev3l_j4         | 3.40037     | 4.24986              | 0           | 1         | 1         |
| Rev3l_j5         | 1.72342     | 0.813609             | 0           | 1         | 1         |
| Cdk19_j2         | 1.56136     | 1.98914              | 0           | 1         | 1         |
| 9030224M15Rik_j1 | 0.0599273   | 0.00727915           | -3.04137    | 0.526682  | 1         |
| Wasf1            | 3.17517     | 3.73851              | 0           | 1         | 1         |
| Mical1_j2        | 5.94709     | 4.93741              | -0.268429   | 0.0418877 | 0.231058  |
| Mical1_j9        | 18.0822     | 24.4267              | 0.433887    | 0.0001622 | 0.0032241 |
| Cd164_j2         | 102.126     | 91.3339              | -0.161125   | 0.0601024 | 0.288687  |
| Scml4_j1         | 0.258203    | 0 -1.79769e+308      |             | 5.03E-09  | 3.74E-07  |
| Rtn4ip1_j3       | 8.87096     | 8.81146              | -0.00970904 | 0.934543  | 0.979958  |
| Popdc3_j1        | 0.32399     | 0.332609             | 0           | 1         | 1         |
| Lilrb4_j10       | 0.0621719   | 0.150846             | 1.27875     | 0.184788  | 1         |
| Hsf2_j1          | 0.289893    | 0.252846             | -0.197264   | 0.795644  | 0.931954  |
| Pkib             | 0.874283    | 0.982371             | 0.168168    | 0.504772  | 0.787836  |
| Gcc2_j2          | 0           | 0.30112 1.79769e+308 |             | 5.39E-07  | 2.41E-05  |
| Ranbp2_j1        | 0.646804    | 0.300391             | 0           | 1         | 1         |
| Ccdc138_j7       | 0.0700255   | 0.18094              | 1.36956     | 0.135971  | 0.458734  |

|                  |             |           |              |           |           |
|------------------|-------------|-----------|--------------|-----------|-----------|
| Ccdc138_j8       | 0.162224    | 0.0464464 | -1.80435     | 0.13658   | 0.459623  |
| P4ha1_j4         | 1.99096     | 2.24675   | 0            | 1         | 1         |
| Cbara1_j3        | 27.9868     | 26.4569   | -0.081107    | 0.530862  | 0.803315  |
| Dnajb12          | 4.02061     | 5.08115   | 0            | 1         | 1         |
| Dnajb12_j1       | 1.25591     | 1.4985    | 0            | 1         | 1         |
| Spock2_j2        | 204.158     | 152.235   | 0            | 1         | 1         |
| Spock2_j4        | 188.382     | 188.123   | 0            | 1         | 1         |
| Psap_j2          | 4.95517     | 5.27279   | 0.0896338    | 0.619987  | 0.850928  |
| Lrrc20           | 1.29002     | 1.05763   | 0            | 1         | 1         |
| Lrrc20_j3        | 5.51623     | 6.57653   | 0            | 1         | 1         |
| Lrrc20_j5        | 1.02615     | 0.864273  | 0            | 1         | 1         |
| Ppa1_j1          | 9.33127     | 13.9567   | 0            | 1         | 1         |
| Tysnd1_j1        | 4.97162     | 5.74883   | 0.209552     | 0.311217  | 0.655964  |
| Dna2_j2          | 0.0843063   | 0.112478  | 0.415928     | 0.677017  | 1         |
| Jmjd1c_j11       | 3.061       | 4.22312   | 0.464308     | 0.0403283 | 0.225053  |
| Rtkn2_j2         | 0.0562965   | 0.23646   | 2.07048      | 0.035314  | 0.207003  |
| Rhobtb1_j2       | 0           | 0.0933792 | 1.79769e+308 | 0.0999157 | 1         |
| Rhobtb1_j3       | 0.100429    | 0.143988  | 0.519777     | 0.490311  | 1         |
| Ank3_j4          | 1.0184      | 1.19458   | 0.230201     | 0.204344  | 0.548495  |
| Ank3_j9          | 11.7986     | 13.9432   | 0.240944     | 0.0137485 | 0.108056  |
| Ank3_j14         | 12.0897     | 20.1797   | 0.73913      | 1.89E-07  | 9.39E-06  |
| Fam13c           | 0.151162    | 0.13888   | 0            | 1         | 1         |
| lpmk_j1          | 2.67331     | 3.55665   | 0            | 1         | 1         |
| Gnaz_j4          | 0.7196      | 0.685814  | 0            | 1         | 1         |
| Rab36_j2         | 0           | 1.33502   | 0            | 1         | 1         |
| Specc1l_j1       | 4.40502     | 5.76398   | 0            | 1         | 1         |
| Specc1l_j2       | 0.0649548   | 2.46514   | 0            | 1         | 1         |
| Adora2a_j3       | 0.232515    | 0.0828415 | -1.4889      | 0.0982875 | 0.387559  |
| Ggt1_j2          | 0.000123021 | 0.165262  | 10.3916      | 0.958694  | 0.988076  |
| Ggt5             | 2.01565     | 3.51508   | 0.802309     | 0.0001341 | 0.0027372 |
| Derl3_j1         | 0.0722347   | 0.144839  | 1.00369      | 0.311874  | 1         |
| Zfp280b_j2       | 2.80038     | 2.16308   | 0            | 1         | 1         |
| S100b_j3         | 379.115     | 318.961   | 0            | 1         | 1         |
| 1700027D21Rik_j1 | 0.0494502   | 0.110463  | 1.15952      | 0.241474  | 1         |
| Pofut2_j1        | 0           | 1.16276   | 1.79769e+308 | 3.40E-08  | 2.11E-06  |
| Itgb2_j3         | 0.194097    | 0.306502  | 0.659121     | 0.276029  | 0.624922  |
| Icosl_j2         | 0           | 0.20933   | 1.79769e+308 | 0.0022936 | 0.0278109 |
| Gm16517_j1       | 28.3287     | 31.5095   | 0.153525     | 0.224351  | 0.57151   |
| Gzmm_j1          | 2.2634      | 3.50042   | 0.629038     | 0.0001705 | 0.0033587 |
| Fgf22            | 1.32405     | 1.39698   | 0            | 1         | 1         |
| Fstl3_j4         | 0.844243    | 1.26289   | 0.581        | 0.0756872 | 0.332297  |
| Palm             | 43.2229     | 46.8342   | 0.115765     | 0.212505  | 0.557606  |
| Ptbp1_j1         | 0.0736158   | 0.0563101 | 0            | 1         | 1         |
| Kiss1r           | 0.729476    | 0.704231  | -0.0508119   | 0.820401  | 0.941839  |
| Kiss1r_j2        | 0.153635    | 0.121636  | -0.336932    | 0.550679  | 0.815501  |
| Kiss1r_j1        | 0.0437759   | 0.108969  | 1.31571      | 0.0914183 | 1         |
| Cnn2_j2          | 1.67413     | 2.35547   | 0.492603     | 0.0671517 | 0.309753  |

|                  |           |             |              |           |           |
|------------------|-----------|-------------|--------------|-----------|-----------|
| Abca7_j7         | 0.866829  | 0.323401    | 0            | 1         | 1         |
| Hmha1_j3         | 0.199903  | 0.419378    | 1.06895      | 0.230545  | 0.577519  |
| Hmha1_j4         | 0.215118  | 0.317924    | 0.563553     | 0.581551  | 0.832358  |
| Hmha1_j6         | 0.0403958 | 0.223239    | 2.46631      | 0.142897  | 0.469774  |
| Gpx4_j1          | 1.76893   | 2.56839     | 0.537987     | 0.0002991 | 0.0053343 |
| Atp5d_j3         | 2.72969   | 4.3968      | 0            | 1         | 1         |
| Cirbp_j5         | 4.02915   | 4.34033     | 0.107329     | 0.514852  | 0.793837  |
| Mum1_j2          | 0         | 0.0922937   | 0            | 1         | 1         |
| Mum1_j5          | 1.08117   | 1.10469     | 0            | 1         | 1         |
| Ndufs7           | 15.5163   | 13.8056     | -0.168525    | 0.226263  | 0.573441  |
| Rps15_j5         | 1.07529   | 1.90846     | 0.827683     | 0.224459  | 0.571576  |
| Izumo4_j2        | 4.90364   | 5.06308     | 0.0461607    | 0.84277   | 0.950279  |
| Izumo4           | 10.1442   | 10.4327     | 0.0404483    | 0.818817  | 0.941291  |
| Dot1l_j8         | 0.0301175 | 0.337917    | 3.48799      | 8.99E-07  | 3.79E-05  |
| Dot1l_j9         | 0.110621  | 0.0679016   | -0.704104    | 0.481867  | 1         |
| Sf3a2_j2         | 0.0905999 | 0.256757    | 1.50282      | 0.0166456 | 0.123911  |
| Amh_j2           | 0.216356  | 0.000322506 | -9.38987     | 0.886963  | 0.964085  |
| Sspl2b_j7        | 1.34841   | 1.36305     | 0.0155796    | 0.975528  | 0.992893  |
| Eef2_j4          | 0.407791  | 0.424429    | 0.0576931    | 0.891769  | 0.965687  |
| Zfr2             | 7.31281   | 6.87689     | 0            | 1         | 1         |
| Matk             | 0.445995  | 0.48573     | 0            | 1         | 1         |
| Apba3_j2         | 1.71267   | 3.06852     | 0            | 1         | 1         |
| Dohh             | 24.9088   | 25.7419     | 0.0474605    | 0.647589  | 0.864202  |
| BC025920_j1      | 0.124965  | 0.216139    | 0.79044      | 0.330715  | 0.672484  |
| Ankrd24_j1       | 0.175544  | 0.078682    | 0            | 1         | 1         |
| Ankrd24_j4       | 0         | 0.0883236   | 0            | 1         | 1         |
| BC064812_j1      | 0.358955  | 0.2135      | -0.749562    | 0.249192  | 0.596644  |
| AU041133         | 1.4101    | 1.3673      | -0.0444743   | 0.838678  | 0.948621  |
| XLOC_002451      | 0.118161  | 0.0787049   | -0.586232    | 0.574975  | 1         |
| Mif1_j6          | 0.304645  | 0.339064    | 0.154431     | 1         | 1         |
| Txnrd1_j2        | 11.5749   | 15.3497     | 0            | 1         | 1         |
| Chst11           | 1.72705   | 1.81277     | 0            | 1         | 1         |
| A230046K03Rik    | 9.27764   | 7.6073      | 0            | 1         | 1         |
| A230046K03Rik_j4 | 7.58394   | 7.9301      | 0            | 1         | 1         |
| Ric8b_j2         | 0.124112  | 0           | 0            | 1         | 1         |
| XLOC_002469      | 0.0506278 | 0.309517    | 2.61202      | 0.12938   | 0.44831   |
| Btbd11           | 0.910885  | 0.783745    | 0            | 1         | 1         |
| BC030307         | 0.0339399 | 0.113891    | 1.7466       | 0.188277  | 1         |
| BC030307_j9      | 0         | 0.060592    | 1.79769e+308 | 0.0709478 | 1         |
| Igf1_j3          | 0.494859  | 0.772863    | 0.643197     | 0.12218   | 0.435216  |
| Ccdc53           | 5.16603   | 4.88446     | -0.0808558   | 0.738073  | 0.907854  |
| Arl1_j1          | 31.5072   | 37.3602     | 0.245819     | 0.0145051 | 0.112282  |
| AK048993         | 0.504871  | 0.400295    | 0            | 1         | 1         |
| Uhrf1bp1_j4      | 13.482    | 12.9974     | -0.0528112   | 0.586146  | 0.834297  |
| Anks1b_j8        | 0.0906003 | 0.129552    | 0            | 1         | 1         |
| Anks1b_j7        | 0.151777  | 0.504293    | 0            | 1         | 1         |
| Ikbip_j1         | 3.72331   | 3.42827     | -0.119104    | 0.635689  | 0.858773  |

|             |           |                 |            |           |           |
|-------------|-----------|-----------------|------------|-----------|-----------|
| Lta4h_j3    | 1.54209   | 1.3535          | -0.188197  | 0.662429  | 0.872014  |
| Fgd6_j2     | 0.856402  | 0.826755        | -0.0508284 | 0.842788  | 0.950279  |
| Tmcc3_j3    | 0         | 0.333368        | 0          | 1         | 1         |
| Ccdc41_j2   | 5.94264   | 5.44813         | -0.125342  | 0.442195  | 0.750452  |
| Ube2n_j2    | 0.0536089 | 0 -1.79769e+308 |            | 0.0100972 | 1         |
| XLOC_002513 | 0.153523  | 0.203201        | 0.40445    | 0.604448  | 0.843983  |
| Eea1_j1     | 3.81254   | 3.02751         | 0          | 1         | 1         |
| Epyc_j2     | 0.252257  | 0.209464        | -0.268191  | 0.642682  | 0.862182  |
| XLOC_002519 | 0.177173  | 0.150633        | -0.234122  | 0.81646   | 0.940246  |
| Atp2b1_j4   | 4.20188   | 3.95823         | 0          | 1         | 1         |
| Kitl        | 0.0885717 | 0.368063        | 0          | 1         | 1         |
| Kitlg_j3    | 0.536487  | 0.501183        | 0          | 1         | 1         |
| Cep290_j3   | 1.36419   | 1.17051         | -0.220909  | 0.242716  | 0.590089  |
| Rassf9_j1   | 0.46676   | 0.480838        | 0.0428715  | 0.919363  | 0.974738  |
| XLOC_002527 | 0.212834  | 0.154265        | -0.464318  | 0.5877    | 0.835072  |
| Gm15663     | 0.970446  | 0.767305        | -0.338847  | 0.0846316 | 0.35511   |
| Ppfia2_j1   | 0.325267  | 0.655969        | 1.012      | 0.0004306 | 0.0071841 |
| Ppfia2_j11  | 3.92057   | 5.12134         | 0.385455   | 0.0691807 | 0.315322  |
| Ppp1r12a_j2 | 1.1039    | 1.35206         | 0          | 1         | 1         |
| Csrp2_j1    | 2.80107   | 2.96123         | 0.0802175  | 0.82364   | 0.943114  |
| Osbp18_j1   | 0.275609  | 0.871202        | 0          | 1         | 1         |
| Nap1l1_j7   | 9.97873   | 9.30312         | 0          | 1         | 1         |
| Kcnc2_j2    | 1.51363   | 1.60069         | 0.080684   | 0.695787  | 0.887819  |
| Zfc3h1_j6   | 9.43118   | 9.59037         | 0          | 1         | 1         |
| Mdm1_j6     | 0.306522  | 0.423514        | 0.466419   | 0.230897  | 0.577971  |
| Mdm1        | 0.29599   | 0.134997        | -1.13262   | 0.070424  | 0.318901  |
| Grip1       | 0.706088  | 0.777992        | 0          | 1         | 1         |
| Llph_j8     | 0.259583  | 0.213285        | -0.283414  | 0.558494  | 0.820112  |
| XLOC_002569 | 0.192789  | 0.103299        | -0.900203  | 0.31587   | 0.659833  |
| Fam19a2_j5  | 0.0440569 | 0.171048        | 1.95696    | 0.0277268 | 0.176384  |
| Avil_j4     | 37.6632   | 41.5468         | 0          | 1         | 1         |
| Avil_j3     | 46.2613   | 30.0016         | 0          | 1         | 1         |
| Avil_j12    | 1.57185   | 0.844749        | 0          | 1         | 1         |
| Agap2_j2    | 4.49974   | 3.77542         | -0.253206  | 0.0886937 | 0.36503   |
| B4galnt1_j5 | 1.47726   | 1.31374         | -0.169245  | 0.63034   | 0.856283  |
| B4galnt1_j6 | 8.91443   | 11.996          | 0.428339   | 0.028078  | 0.177828  |
| Dctn2_j1    | 157.818   | 154.213         | 0          | 1         | 1         |
| Arhgap9_j2  | 0.116909  | 0.16121         | 0.463555   | 0.483279  | 0.775954  |
| R3hdm2_j3   | 1.67953   | 1.2024          | 0          | 1         | 1         |
| Stac3_j3    | 0.108552  | 0.0615567       | -0.818393  | 0.445757  | 1         |
| Stac3_j16   | 0.0624033 | 0 -1.79769e+308 |            | 0.0987431 | 1         |
| Tmem194     | 0.393147  | 0.2757          | -0.51197   | 0.346311  | 0.685483  |
| Myo1a_j1    | 2.7617    | 3.94639         | 0          | 1         | 1         |
| Myo1a_j6    | 1.31901   | 1.20875         | 0          | 1         | 1         |
| Myo1a_j8    | 1.16324   | 0.829068        | 0          | 1         | 1         |
| Prim1_j1    | 0.845651  | 1.51002         | 0.836438   | 0.0121932 | 0.0993683 |
| Naca_j2     | 0.100295  | 0.113793        | 0.18216    | 0.85579   | 1         |



|             |             |           |              |           |           |
|-------------|-------------|-----------|--------------|-----------|-----------|
| Naca_j1     | 0.466953    | 0.602975  | 0.368819     | 0.358829  | 0.694085  |
| XLOC_002597 | 0.00901546  | 0.0839069 | 3.21832      | 0.306692  | 1         |
| Ptges3_j1   | 1.6877      | 0.539451  | -1.64549     | 2.09E-05  | 0.000576  |
| Ptges3_j4   | 1.33979     | 1.67089   | 0.318617     | 0.133044  | 0.453967  |
| Baz2a_j2    | 2.99639     | 2.83006   | -0.082391    | 0.546459  | 0.81297   |
| Gls2_j3     | 0.0624351   | 0         | 0            | 1         | 1         |
| Stat2_j4    | 6.77994     | 9.9346    | 0            | 1         | 1         |
| Smarcc2_j2  | 6.41999     | 7.25936   | 0            | 1         | 1         |
| Smarcc2_j4  | 5.08382     | 5.86737   | 0            | 1         | 1         |
| XLOC_002609 | 0.1526      | 0.0821273 | 0            | 1         | 1         |
| Pym_j2      | 0.000620305 | 0.209529  | 0            | 1         | 1         |
| Pym_j3      | 0.752392    | 1.24208   | 0            | 1         | 1         |
| Pym_j5      | 2.14        | 2.55454   | 0            | 1         | 1         |
| Dnajc14_j2  | 0.832588    | 0         | 0            | 1         | 1         |
| Cd63_j10    | 0           | 0.0634671 | 1.79769e+308 | 0.166435  | 1         |
| Itga7_j2    | 21.7555     | 42.4367   | 0            | 1         | 1         |
| Itga7_j8    | 3.48823     | 8.53934   | 0            | 1         | 1         |
| Esr1_j6     | 0.180928    | 0.052629  | 0            | 1         | 1         |
| Mthfd1l     | 1.0223      | 0.341075  | 0            | 1         | 1         |
| Plekhg1_j4  | 1.70432     | 1.43445   | 0            | 1         | 1         |
| lyd         | 0.163583    | 0.242035  | 0.565192     | 0.357939  | 0.693676  |
| Pcmt1_j7    | 24.2829     | 25.1213   | 0            | 1         | 1         |
| Ust_j6      | 0.346537    | 0         | 0            | 1         | 1         |
| Ust         | 8.64739     | 7.31321   | 0            | 1         | 1         |
| Sash1_j4    | 0.425589    | 0.395014  | 0            | 1         | 1         |
| Stxbp5_j1   | 0.564209    | 0.577669  | 0            | 1         | 1         |
| Utrn_j3     | 0.797786    | 0.535673  | 0            | 1         | 1         |
| Utrn_j6     | 1.42946     | 0.696323  | 0            | 1         | 1         |
| Utrn_j2     | 11.7611     | 9.64906   | 0            | 1         | 1         |
| Stx11_j2    | 1.20109     | 1.95649   | 0.703929     | 0.0028733 | 0.0332573 |
| Ltv1_j1     | 1.90992     | 3.17043   | 0            | 1         | 1         |
| Phactr2     | 2.74358     | 1.20089   | 0            | 1         | 1         |
| Gpr126_j2   | 2.23547     | 2.17871   | 0            | 1         | 1         |
| Gpr126_j3   | 0.141508    | 0.249281  | 0            | 1         | 1         |
| Ccdc28a_j2  | 3.19519     | 3.03644   | -0.0735224   | 0.788676  | 0.929506  |
| Tbpl1       | 14.8575     | 17.2194   | 0.212844     | 0.0373828 | 0.214381  |
| AK014660_j1 | 0.138258    | 0.122944  | -0.169362    | 0.773941  | 0.923306  |
| Akap7       | 0.67594     | 0.716039  | 0.0831431    | 0.828938  | 0.944763  |
| Akap7_j6    | 0.55107     | 0.412179  | -0.418966    | 0.320959  | 0.664116  |
| Akap7_j5    | 1.99682     | 1.97341   | -0.0170182   | 0.943103  | 0.982807  |
| L3mbtl3_j7  | 0.320279    | 0         | 0            | 1         | 1         |
| L3mbtl3     | 0.168183    | 0.721871  | 0            | 1         | 1         |
| Lama2_j9    | 0.0795059   | 0.267526  | 1.75054      | 0.210463  | 0.55502   |
| Lama2_j10   | 2.86069     | 3.05592   | 0.0952459    | 0.770263  | 0.921804  |
| Trmt11_j2   | 0.183179    | 0.154521  | -0.245452    | 0.756436  | 0.916036  |
| Ncoa7       | 15.8683     | 14.2691   | 0            | 1         | 1         |
| Nkain2_j5   | 0.0619055   | 0.0738557 | 0.254641     | 0.87363   | 1         |

|                  |           |           |               |           |           |
|------------------|-----------|-----------|---------------|-----------|-----------|
| Zufsp_j2         | 0.490741  | 0.0955141 | -2.36118      | 0.0515261 | 0.263203  |
| Rwdd1_j4         | 8.92389   | 8.94085   | 0             | 1         | 1         |
| 1700025K23Rik_j2 | 2.24341   | 1.58939   | -0.497214     | 0.431183  | 0.743519  |
| Gm16365          | 0.494968  | 0.910539  | 0.879385      | 0.0327837 | 0.197151  |
| AK164126_j1      | 0.420839  | 0.523028  | 0.313621      | 0.192786  | 0.535072  |
| AK164126_j2      | 2.44523   | 2.77633   | 0.18321       | 0.390372  | 0.717228  |
| AK164126_j3      | 1.02655   | 1.02324   | -0.00465898   | 0.987613  | 0.996374  |
| AA474331_j1      | 0.181107  | 0.155688  | -0.21819      | 0.663549  | 0.872642  |
| Al317395         | 0.111455  | 0.034266  | -1.70161      | 0.190996  | 1         |
| Rpf2_j1          | 0         | 0.0730817 | 0             | 1         | 1         |
| Rpf2_j10         | 0.48754   | 0.651544  | 0             | 1         | 1         |
| Rpf2_j7          | 0.159434  | 0.499723  | 0             | 1         | 1         |
| Fig4_j1          | 7.93818   | 10.334    | 0.380519      | 0.0255495 | 0.166801  |
| Smpd2_j1         | 0.123996  | 0.215177  | 0.795224      | 0.0155537 | 0.117796  |
| Ccdc162_j7       | 0         | 0.088057  | 1.79769e+308  | 0.0933057 | 1         |
| Ccdc162_j6       | 0.036092  | 0.0521742 | 0.53166       | 0.745994  | 1         |
| XLOC_002728      | 0.130971  | 0.0695918 | -0.912262     | 0.561554  | 1         |
| Cep571_j1        | 0.314701  | 0.529725  | 0             | 1         | 1         |
| Cep571           | 0.167064  | 0.102084  | 0             | 1         | 1         |
| Cep571_j3        | 0.257929  | 0         | 0             | 1         | 1         |
| Lace1_j3         | 1.17533   | 1.29517   | 0             | 1         | 1         |
| Lace1_j4         | 0.0295408 | 0.922073  | 0             | 1         | 1         |
| AK145144_j2      | 0.58645   | 0.310514  | -0.91735      | 0.350141  | 0.687728  |
| AK145144_j1      | 0.579516  | 0.431422  | -0.42575      | 0.399436  | 0.723014  |
| AK145144_j3      | 1.19099   | 0.968401  | -0.298487     | 0.623459  | 0.852859  |
| 1700021F05Rik    | 22.4617   | 21.0121   | -0.0962472    | 0.441936  | 0.750339  |
| Aim1_j1          | 0.243807  | 0.568679  | 1.22188       | 0.0009735 | 0.0139897 |
| Grik2_j5         | 0.261218  | 0.342109  | 0             | 1         | 1         |
| Fam184a_j1       | 0.150473  | 0.2459    | 0             | 1         | 1         |
| D630037F22Rik_j1 | 0.130173  | 0         | -1.79769e+308 | 3.79E-07  | 1         |
| Serinc1_j5       | 61.9495   | 82.0572   | 0             | 1         | 1         |
| Sept10_j1        | 0.0821094 | 0.0242536 | -1.75935      | 0.122227  | 1         |
| Anapc16_j2       | 21.0063   | 24.5427   | 0.224474      | 0.230093  | 0.577146  |
| H2afy2_j1        | 1.75366   | 1.62958   | -0.105867     | 0.675857  | 0.878002  |
| Col13a1_j1       | 0.172287  | 0.192     | 0.156285      | 0.782731  | 0.92665   |
| Col13a1_j2       | 0.075496  | 0         | -1.79769e+308 | 0.0103934 | 1         |
| Hk1_j1           | 1.16061   | 1.69946   | 0             | 1         | 1         |
| Hk1_j2           | 46.7227   | 54.5834   | 0             | 1         | 1         |
| Supv3l1_j4       | 0.035845  | 0.0693113 | 0             | 1         | 1         |
| Vps26a_j2        | 0.105013  | 0.252074  | 0             | 1         | 1         |
| Vps26a_j3        | 1.89803   | 3.34121   | 0             | 1         | 1         |
| Srgn_j2          | 0.0896779 | 0.245809  | 1.45471       | 0.143901  | 0.4709    |
| Ddx50_j6         | 3.87072   | 4.12292   | 0             | 1         | 1         |
| Ddx50_j7         | 1.78819   | 2.54514   | 0             | 1         | 1         |
| Ccar1_j1         | 0.243904  | 0.0397073 | 0             | 1         | 1         |
| Hnrnp3_j1        | 5.40951   | 5.26875   | -0.0380387    | 0.744258  | 0.910726  |
| mKIAA4170        | 0.187073  | 0.116996  | -0.677134     | 0.343971  | 0.683974  |

|             |           |           |              |           |           |
|-------------|-----------|-----------|--------------|-----------|-----------|
| Arid5b_j3   | 0.189562  | 0.0824693 | 0            | 1         | 1         |
| Phyhipl_j1  | 18.1775   | 15.7832   | 0            | 1         | 1         |
| Susd2_j4    | 134.657   | 116.185   | -0.212868    | 0.0140275 | 0.109631  |
| Susd2_j8    | 49.1825   | 32.4539   | -0.599754    | 4.02E-09  | 3.03E-07  |
| Cabin1_j4   | 0.0560883 | 0.0565244 | 0            | 1         | 1         |
| Pcnt_j5     | 0.265084  | 0.238691  | 0            | 1         | 1         |
| Ybey_j2     | 0.323539  | 0.263624  | -0.295458    | 0.697354  | 0.888574  |
| Col6a2_j1   | 1.21422   | 1.60584   | 0            | 1         | 1         |
| Pcbp3_j8    | 7.17058   | 16.2139   | 0            | 1         | 1         |
| Pcbp3_j9    | 0.349799  | 0.225995  | 0            | 1         | 1         |
| Col18a1_j6  | 0.14199   | 0.143666  | 0.0169254    | 0.967466  | 0.990787  |
| Trpm2_j3    | 0.871395  | 1.27464   | 0.548688     | 0.0910184 | 0.370963  |
| Pfkl_j1     | 0.506979  | 0.468556  | -0.113705    | 0.644339  | 0.862839  |
| D10Jhu81e   | 19.2978   | 17.6645   | -0.127584    | 0.324519  | 0.667503  |
| Agpat3_j6   | 1.18445   | 0.660758  | -0.842028    | 0.0010744 | 0.0151306 |
| Agpat3_j5   | 9.13386   | 7.09559   | -0.364303    | 0.0010147 | 0.014474  |
| Rrp1_j2     | 14.6349   | 17.4594   | 0            | 1         | 1         |
| Mier2_j1    | 1.14436   | 0.615431  | 0            | 1         | 1         |
| C2cd4c      | 2.55103   | 0.851082  | 0            | 1         | 1         |
| Shc2_j7     | 22.1407   | 29.5473   | 0            | 1         | 1         |
| Shc2_j8     | 8.75737   | 10.1027   | 0            | 1         | 1         |
| Shc2        | 16.602    | 19.7096   | 0            | 1         | 1         |
| Med16       | 9.56742   | 9.22676   | 0            | 1         | 1         |
| Dos_j2      | 0.530172  | 0.738842  | 0            | 1         | 1         |
| Pcsk4_j2    | 0         | 0.107145  | 1.79769e+308 | 0.0317976 | 1         |
| Adamts15_j8 | 0.356587  | 0.129078  | -1.46601     | 0.0259736 | 0.168868  |
| Uqcr11      | 14.3228   | 13.6104   | -0.0735966   | 0.684142  | 0.881956  |
| Tcf3_j2     | 0.691981  | 0.231691  | 0            | 1         | 1         |
| Atp8b3_j10  | 0.152195  | 0.176999  | 0.21782      | 0.759965  | 0.917326  |
| Atp8b3_j9   | 0.0390323 | 0.0550767 | 0.496774     | 0.720099  | 1         |
| Fam108a     | 48.317    | 50.4417   | 0.0620863    | 0.512902  | 0.792303  |
| Mobkl2a_j1  | 10.3923   | 12.9685   | 0.319503     | 0.0044283 | 0.0464152 |
| Lsm7_j1     | 1.02107   | 1.69824   | 0.733955     | 0.018462  | 0.133443  |
| Timm13      | 63.6375   | 69.4605   | 0.126316     | 0.193969  | 0.536219  |
| Slc39a3     | 11.7484   | 13.0406   | 0            | 1         | 1         |
| Sgta_j2     | 5.47044   | 7.13309   | 0            | 1         | 1         |
| Sgta        | 5.01657   | 6.20288   | 0            | 1         | 1         |
| Atcay_j1    | 0.407685  | 0.654985  | 0            | 1         | 1         |
| Mrpl54_j1   | 38.0645   | 38.0909   | 0            | 1         | 1         |
| Mrpl54      | 3.26772   | 3.13978   | 0            | 1         | 1         |
| Gipc3       | 0.148146  | 0.173712  | 0.229673     | 0.655395  | 0.868295  |
| Hmg20b_j3   | 0         | 1.92896   | 0            | 1         | 1         |
| Hmg20b      | 1.71071   | 2.23284   | 0            | 1         | 1         |
| Fzr1_j3     | 1.9453    | 2.31275   | 0.249616     | 0.178339  | 0.517853  |
| Nfic_j3     | 1.37824   | 0.992535  | 0            | 1         | 1         |
| Nfic        | 9.4662    | 6.83796   | 0            | 1         | 1         |
| Celf5_j4    | 0.102729  | 0.0656993 | 0            | 1         | 1         |

|              |            |             |            |           |           |
|--------------|------------|-------------|------------|-----------|-----------|
| Ncln_j3      | 3.90669    | 5.24117     | 0          | 1         | 1         |
| Tle6_j1      | 1.13728    | 1.17168     | 0.042991   | 0.876202  | 0.960645  |
| Sirt6_j1     | 2.03447    | 1.43225     | -0.506374  | 0.0858285 | 0.357676  |
| Nfyb_j3      | 0.494537   | 0.000202781 | 0          | 1         | 1         |
| Slc41a2_j4   | 0.92353    | 2.00184     | 0          | 1         | 1         |
| Aldh1l2_j1   | 0.318349   | 0.41313     | 0.375987   | 0.374837  | 0.707307  |
| Nuak1_j1     | 0.246987   | 0.109118    | 0          | 1         | 1         |
| D10Wsu52e_j1 | 11.2048    | 14.9036     | 0.411537   | 0.0098502 | 0.0847739 |
| Hsp90b1      | 8.9794     | 5.04386     | 0          | 1         | 1         |
| Hsp90b1_j1   | 60.0809    | 64.4222     | 0          | 1         | 1         |
| Stab2_j1     | 0.102846   | 0.0878542   | -0.227302  | 0.81664   | 1         |
| Ano4_j9      | 2.48821    | 3.31008     | 0          | 1         | 1         |
| Ano4_j6      | 1.85664    | 1.4564      | 0          | 1         | 1         |
| Scyl2        | 0.0733935  | 0.000506384 | 0          | 1         | 1         |
| Scyl2_j6     | 0.299079   | 0.728796    | 0          | 1         | 1         |
| Actr6_j1     | 5.86374    | 5.57492     | -0.0728688 | 0.669395  | 0.874823  |
| Apaf1_j2     | 0.125632   | 0.157699    | 0          | 1         | 1         |
| Apaf1_j3     | 0.116442   | 0.455172    | 0          | 1         | 1         |
| Slc25a3_j3   | 0.38127    | 0.365601    | 0          | 1         | 1         |
| Tmpo_j4      | 0.499025   | 0.77793     | 0          | 1         | 1         |
| BC065048_j2  | 0.0705387  | 0.000354409 | -7.63686   | 0.880649  | 1         |
| Vezt_j9      | 1.85272    | 0.927763    | 0          | 1         | 1         |
| Cradd        | 1.92979    | 2.12401     | 0.138341   | 0.565371  | 0.823805  |
| Socs2_j1     | 0.261958   | 0.800247    | 0          | 1         | 1         |
| Mrpl42_j2    | 2.08957    | 2.47535     | 0.244425   | 0.622941  | 0.852533  |
| XLOC_002971  | 0.118538   | 0.126922    | 0.098595   | 0.937244  | 1         |
| Acss3_j3     | 0.411156   | 0.160456    | -1.35751   | 0.0222222 | 0.15159   |
| Acss3_j4     | 0.230624   | 0.123339    | -0.902909  | 0.120347  | 0.43198   |
| Syt1_j4      | 13.4349    | 10.666      | 0          | 1         | 1         |
| Syt1         | 23.7124    | 21.6784     | 0          | 1         | 1         |
| Nav3_j5      | 0.546252   | 0.467174    | -0.225608  | 0.525071  | 0.800504  |
| Zdhhc17_j1   | 7.59278    | 3.7825      | 0          | 1         | 1         |
| Tph2_j4      | 0.00015062 | 0.0655846   | 8.7663     | 0.895731  | 1         |
| Tmem19       | 8.84719    | 10.2253     | 0          | 1         | 1         |
| Thap2        | 1.17245    | 1.01038     | 0          | 1         | 1         |
| Lgr5_j1      | 0          | 0.0829229   | 0          | 1         | 1         |
| Cnot2_j1     | 0.536903   | 0.354538    | 0          | 1         | 1         |
| Rab3ip_j2    | 0.220229   | 0.189522    | 0          | 1         | 1         |
| Frs2_j1      | 1.97112    | 2.61465     | 0          | 1         | 1         |
| Rap1b_j1     | 28.8381    | 34.0338     | 0          | 1         | 1         |
| Cand1_j3     | 5.33097    | 8.19608     | 0          | 1         | 1         |
| Helb_j1      | 0.022562   | 0.154906    | 2.77943    | 0.0047605 | 1         |
| Lemd3_j2     | 0.60537    | 0.14099     | -2.10222   | 0.0010159 | 0.014488  |
| Tbc1d30_j1   | 0.0843291  | 0.564537    | 0          | 1         | 1         |
| Tbk1_j1      | 1.26459    | 2.30352     | 0.865173   | 0.0246087 | 0.162594  |
| Tbk1_j2      | 2.23751    | 2.53507     | 0.180135   | 0.508688  | 0.790455  |
| Xpot_j7      | 0.149938   | 0           | 0          | 1         | 1         |

|             |           |                 |            |           |          |
|-------------|-----------|-----------------|------------|-----------|----------|
| Tmem5_j1    | 11.6734   | 13.0284         | 0.158442   | 0.213535  | 0.558716 |
| Mon2_j2     | 7.37145   | 8.35061         | 0.179933   | 0.348727  | 0.686735 |
| Slc16a7_j9  | 0.530987  | 0.469093        | 0          | 1         | 1        |
| Slc16a7_j10 | 0.316069  | 0.0539245       | 0          | 1         | 1        |
| Tspan31_j1  | 13.7617   | 12.3695         | 0          | 1         | 1        |
| Arhgef25_j2 | 0.834552  | 0.397859        | 0          | 1         | 1        |
| Arhgef25    | 17.9921   | 18.5364         | 0          | 1         | 1        |
| Dtx3_j9     | 1.53746   | 2.66508         | 0          | 1         | 1        |
| Dtx3_j7     | 1.00958   | 0               | 0          | 1         | 1        |
| Kif5a_j4    | 55.8513   | 44.3001         | 0          | 1         | 1        |
| Kif5a_j5    | 3.5241    | 3.58726         | 0          | 1         | 1        |
| Kif5a_j6    | 5.49686   | 5.80122         | 0          | 1         | 1        |
| Lrp1_j2     | 7.37326   | 7.83146         | 0          | 1         | 1        |
| Lrp1_j8     | 1.60448   | 2.0915          | 0          | 1         | 1        |
| Nab2        | 2.12475   | 2.48326         | 0          | 1         | 1        |
| Coq10a_j1   | 0.987813  | 1.07366         | 0          | 1         | 1        |
| Esyt1_j3    | 36.5873   | 60.6087         | 0          | 1         | 1        |
| Erbp3_j2    | 0.0345412 | 0.0609886       | 0          | 1         | 1        |
| Rab5b_j1    | 78.2901   | 78.3489         | 0.0010837  | 0.989974  | 0.996929 |
| Rab5b       | 7.11026   | 6.40139         | -0.151516  | 0.496152  | 0.783139 |
| Rab5b       | 4.03728   | 3.79985         | -0.0874436 | 0.731695  | 0.905127 |
| Cdk2        | 0.414535  | 0.137327        | -1.59388   | 0.0318647 | 0.193415 |
| Dgka_j7     | 0.455954  | 1.3048          | 0          | 1         | 1        |
| Dgka_j8     | 0.0503892 | 0.0477583       | 0          | 1         | 1        |
| Rdh5_j2     | 4.35664   | 4.57617         | 0.0709256  | 0.687407  | 0.883849 |
| Rdh5_j1     | 2.61664   | 2.84876         | 0.122616   | 0.618635  | 0.850197 |
| Bloc1s1_j1  | 9.00576   | 12.0789         | 0.423566   | 0.0474663 | 0.250134 |
| XLOC_003074 | 0.150151  | 0.195988        | 0.384345   | 0.704843  | 0.892177 |
| XLOC_003074 | 0.147389  | 0 -1.79769e+308 |            | 0.0695026 | 0.316138 |
| Mtrf1l_j1   | 0.931632  | 0.776025        | -0.263657  | 0.266872  | 0.615914 |
| Syne1_j6    | 0.152265  | 0.0361437       | 0          | 1         | 1        |
| Syne1_j7    | 0.267049  | 0.20046         | 0          | 1         | 1        |
| Syne1_j7    | 0.226085  | 0.115734        | 0          | 1         | 1        |
| Syne1_j6    | 0.0874041 | 0.0924532       | 0          | 1         | 1        |
| Syne1_j14   | 9.39437   | 8.87097         | 0          | 1         | 1        |
| Rmnd1_j1    | 0.223139  | 0.254028        | 0.187045   | 0.638857  | 0.860184 |
| Rmnd1_j3    | 0.220702  | 0.15854         | -0.477245  | 0.241298  | 0.588445 |
| Zbtb2       | 0.288341  | 0.117279        | -1.29783   | 0.0528084 | 0.267012 |
| Lats1       | 2.68442   | 2.54532         | -0.0767631 | 0.57463   | 0.828142 |
| XLOC_002193 | 0.0475819 | 0.0377417       | -0.334253  | 0.797946  | 1        |
| XLOC_002195 | 0.141259  | 0.0910223       | -0.634047  | 0.325849  | 0.669123 |
| Plagl1_j5   | 0.698889  | 0.00097049      | 0          | 1         | 1        |
| Cited2_j1   | 1.72422   | 5.07558         | 1.55763    | 2.87E-11  | 3.24E-09 |
| Reps1_j3    | 0.414777  | 1.32409         | 0          | 1         | 1        |
| XLOC_002212 | 0.125082  | 0.133118        | 0.0898316  | 0.940828  | 1        |
| Olig3       | 0.195548  | 0.21541         | 0.139564   | 0.79187   | 0.930476 |
| Mtap7       | 3.94424   | 3.90317         | 0          | 1         | 1        |

|                  |           |             |               |           |           |
|------------------|-----------|-------------|---------------|-----------|-----------|
| Mtap7_j10        | 3.16956   | 1.38303     | 0             | 1         | 1         |
| Bclaf1_j3        | 4.86828   | 4.78021     | 0             | 1         | 1         |
| Ahi1_j3          | 1.22346   | 0.954344    | -0.358387     | 0.125929  | 0.441872  |
| Hbs1l_j3         | 0.23461   | 0.0956168   | -1.29493      | 0.197117  | 0.53985   |
| H60b_j2          | 0.242396  | 0.098986    | -1.29207      | 0.279901  | 0.628722  |
| H60b             | 0.162571  | 0.235783    | 0.536392      | 0.458171  | 0.7608    |
| 1110021L09Rik_j1 | 0.200052  | 0.0938053   | 0             | 1         | 1         |
| Med23_j3         | 0.228717  | 0.10081     | -1.18193      | 0.108889  | 0.410527  |
| Epb4.1l2_j4      | 0         | 0.416045    | 1.79769e+308  | 0.0001854 | 0.0036035 |
| Arhgap18_j2      | 0.230407  | 0           | -1.79769e+308 | 2.17E-07  | 1.06E-05  |
| Arhgap18_j9      | 0.171832  | 0.0705735   | -1.2838       | 0.126554  | 0.443067  |
| Arhgap18_j11     | 0.324121  | 0.377322    | 0.219263      | 0.68349   | 0.881549  |
| Ptprk_j5         | 0.496956  | 0.000121627 | -11.9964      | 0.701583  | 0.890406  |
| 9330159F19Rik_j4 | 0.554786  | 0.598502    | 0             | 1         | 1         |
| Hddc2_j1         | 2.49942   | 2.55135     | 0.0296658     | 0.949869  | 0.98549   |
| Hdac2_j3         | 0.427559  | 0.337056    | 0             | 1         | 1         |
| Rev3l            | 0.486801  | 0.743166    | 0             | 1         | 1         |
| Rev3l_j2         | 0.185159  | 0.0770369   | 0             | 1         | 1         |
| Cdk19            | 0.536529  | 0.691149    | 0             | 1         | 1         |
| Wasf1_j2         | 3.05901   | 2.92999     | 0             | 1         | 1         |
| Zbtb24_j2        | 1.33777   | 1.59873     | 0.257096      | 0.402948  | 0.726049  |
| Mical1           | 1.69336   | 1.71648     | 0.0195623     | 0.903439  | 0.969103  |
| Cd164_j4         | 4.82878   | 2.41484     | -0.999731     | 0.0248888 | 0.163716  |
| Snx3_j1          | 76.6417   | 72.9752     | -0.070723     | 0.495502  | 0.782897  |
| Cd24a            | 140.68    | 129.672     | -0.117547     | 0.181995  | 0.522379  |
| Atg5_j2          | 0.0762772 | 0.063421    | -0.266291     | 0.847919  | 1         |
| Atg5_j1          | 0.297711  | 0.269489    | -0.143688     | 0.821262  | 0.942238  |
| Lilrb4_j8        | 0.0401833 | 0.0550543   | 0.454259      | 0.745266  | 1         |
| Vgll2            | 0.262842  | 0.0543146   | -2.27478      | 0.02418   | 0.160549  |
| Dcblid1_j1       | 0.153555  | 0           | -1.79769e+308 | 0.0004292 | 0.0071701 |
| Dcblid1_j2       | 1.52472   | 1.74526     | 0.194904      | 0.462714  | 0.763368  |
| Nus1_j2          | 12.3201   | 13.1296     | 0             | 1         | 1         |
| Hsf2_j3          | 1.0615    | 1.28328     | 0.27373       | 0.434386  | 0.745508  |
| Pkib_j2          | 7.57726   | 10.6494     | 0.491025      | 5.50E-06  | 0.0001838 |
| Smpdl3a          | 1.82672   | 1.58168     | 0             | 1         | 1         |
| Smpdl3a_j2       | 9.28657   | 8.39378     | 0             | 1         | 1         |
| Smpdl3a_j3       | 3.77766   | 4.18765     | 0             | 1         | 1         |
| Ranbp2_j5        | 0         | 0.342714    | 0             | 1         | 1         |
| Sh3rf3_j1        | 0.0729197 | 1.27E-05    | -12.4863      | 0.959     | 1         |
| P4ha1_j2         | 2.71926   | 3.2595      | 0             | 1         | 1         |
| P4ha1_j1         | 1.44751   | 1.43318     | 0             | 1         | 1         |
| P4ha1_j3         | 1.30615   | 0.592739    | 0             | 1         | 1         |
| Cbara1           | 0.661029  | 0.724058    | 0.131393      | 0.645023  | 0.863048  |
| Cbara1_j5        | 4.00985   | 4.9525      | 0.304608      | 0.154599  | 0.487728  |
| Dnajb12          | 2.60119   | 2.23849     | 0             | 1         | 1         |
| Ascc1            | 1.89704   | 1.93095     | 0.0255547     | 0.935774  | 0.98034   |
| Spock2_j3        | 0.156803  | 0.0602137   | 0             | 1         | 1         |

|                  |           |             |               |           |           |
|------------------|-----------|-------------|---------------|-----------|-----------|
| 4632428N05Rik_j4 | 0.0603129 | 0           | -1.79769e+308 | 0.006097  | 1         |
| Lrrc20_j4        | 1.23104   | 2.88776     | 0             | 1         | 1         |
| Ppa1_j2          | 18.0009   | 17.0369     | 0             | 1         | 1         |
| Dna2_j3          | 0.252437  | 0.304521    | 0.27062       | 0.465003  | 0.764951  |
| Rufy2_j1         | 3.18384   | 3.20375     | 0.00899746    | 0.950328  | 0.985635  |
| Rufy2_j2         | 1.14372   | 0.881741    | -0.375309     | 0.207886  | 0.552228  |
| Herc4_j3         | 0.899817  | 1.00234     | 0             | 1         | 1         |
| Ctnna3_j3        | 0.0885802 | 0.000253377 | -8.44955      | 0.888259  | 1         |
| Egr2_j1          | 0.285717  | 0           | -1.79769e+308 | 1.50E-06  | 5.86E-05  |
| Rtkn2_j4         | 0.110764  | 0           | -1.79769e+308 | 0.0061858 | 1         |
| Rhobtb1_j1       | 0.107935  | 0           | -1.79769e+308 | 0.000162  | 1         |
| Ank3_j3          | 0.105852  | 0           | -1.79769e+308 | 1.31E-09  | 1         |
| Ccdc6_j1         | 0.47107   | 1.57022     | 0             | 1         | 1         |
| Slc16a9_j2       | 1.21064   | 0.543814    | 0             | 1         | 1         |
| Gm9923           | 3.68705   | 3.60964     | -0.0306122    | 0.848083  | 0.951888  |
| Rab36            | 0.51931   | 0.396083    | 0             | 1         | 1         |
| Bcr_j2           | 1.7391    | 2.35786     | 0             | 1         | 1         |
| Ggt5_j2          | 2.24664   | 4.27849     | 0.929332      | 0.0026111 | 0.0308977 |
| S100b_j1         | 0.0356086 | 0.0895831   | 0             | 1         | 1         |
| Lss_j2           | 1.6692    | 0.562209    | 0             | 1         | 1         |
| Slc19a1_j1       | 1.5893    | 0.199637    | -2.99294      | 0.000281  | 0.0050684 |
| Itgb2_j2         | 0.0619988 | 0           | -1.79769e+308 | 0.0144539 | 1         |
| Itgb2            | 0.463808  | 1.01951     | 1.13628       | 2.43E-05  | 0.0006485 |
| Ube2g2_j1        | 2.77263   | 5.17312     | 0.89978       | 0.0400987 | 0.224131  |
| Ube2g2_j2        | 3.32651   | 2.13768     | -0.637964     | 0.215552  | 0.561479  |
| C330046G03Rik_j1 | 0.108655  | 0.034803    | -1.64248      | 0.350133  | 1         |
| 1810043G02Rik_j2 | 15.0906   | 15.9257     | 0.077703      | 0.515308  | 0.794119  |
| Icosl_j3         | 0.0921694 | 0.0736809   | -0.322998     | 0.801839  | 1         |
| Icosl_j4         | 0.157343  | 0.157428    | 0.000780912   | 0.999214  | 0.999635  |
| Ilvbl_j2         | 5.76205   | 4.74678     | 0             | 1         | 1         |
| Ilvbl            | 3.82867   | 3.40796     | 0             | 1         | 1         |
| Slc1a6_j4        | 0.068322  | 0           | -1.79769e+308 | 0.0356515 | 1         |
| Cdc34_j1         | 0.0933964 | 0           | -1.79769e+308 | 0.0003988 | 1         |
| Bsg_j1           | 161.371   | 167.277     | 0             | 1         | 1         |
| XLOC_002393      | 0.146488  | 0.1533      | 0.0655738     | 0.907543  | 0.970775  |
| Fstl3_j3         | 0.638349  | 0           | -1.79769e+308 | 1.90E-08  | 1.27E-06  |
| 9130017N09Rik    | 0.175801  | 0.131753    | -0.416109     | 0.587334  | 0.835002  |
| 9130017N09Rik    | 0.0207914 | 0.103054    | 2.30934       | 0.0831017 | 1         |
| 9130017N09Rik_j3 | 0.43504   | 0.182101    | -1.25641      | 0.0338619 | 0.201403  |
| XLOC_002395      | 0.129036  | 0.103229    | 0             | 1         | 1         |
| Ptbp1            | 0.753886  | 0.845211    | 0             | 1         | 1         |
| Ptbp1            | 0.215786  | 0.112926    | 0             | 1         | 1         |
| Ptbp1_j3         | 0.119881  | 0           | 0             | 1         | 1         |
| Cfd              | 0.0570287 | 0           | -1.79769e+308 | 0.102941  | 1         |
| Cfd              | 0.277299  | 0.0925346   | -1.58338      | 0.0462523 | 0.246499  |
| Arid3a_j4        | 0.175094  | 0.0321371   | -2.44582      | 0.0352673 | 0.206779  |
| Abca7_j2         | 0.756804  | 0.539309    | 0             | 1         | 1         |

|                  |           |           |               |           |          |
|------------------|-----------|-----------|---------------|-----------|----------|
| Abca7_j3         | 6.99433   | 5.97607   | 0             | 1         | 1        |
| Hmha1            | 0.202304  | 0.396499  | 0.970791      | 0.0206269 | 0.143918 |
| Hmha1_j9         | 0.321533  | 0.346746  | 0.10891       | 0.826683  | 0.944157 |
| Atp5d_j1         | 1.22994   | 1.13991   | 0             | 1         | 1        |
| Atp5d_j4         | 1.0548    | 1.20688   | 0             | 1         | 1        |
| Midn_j1          | 2.78815   | 3.21777   | 0             | 1         | 1        |
| Midn             | 5.2569    | 6.2901    | 0             | 1         | 1        |
| Midn_j3          | 2.12609   | 2.78047   | 0             | 1         | 1        |
| Midn_j2          | 1.45389   | 1.51246   | 0             | 1         | 1        |
| Efna2_j2         | 0.422467  | 0.0719395 | -2.55398      | 0.0501886 | 0.258895 |
| Plk5             | 0.180407  | 0.0693439 | -1.37941      | 0.0583387 | 0.28357  |
| Izumo4_j1        | 2.11114   | 1.81103   | -0.221207     | 0.596757  | 0.839716 |
| Izumo4_j3        | 2.52855   | 3.01083   | 0.251853      | 0.371304  | 0.704211 |
| Dot1l_j7         | 0.264933  | 0.278236  | 0.0706842     | 0.816362  | 0.940246 |
| Tmprss9_j1       | 1.12763   | 1.06978   | -0.0759855    | 0.745     | 0.911063 |
| XLOC_002428      | 0.111708  | 0.0333651 | -1.74332      | 0.341237  | 1        |
| Zbtb7a           | 4.17242   | 3.58167   | 0             | 1         | 1        |
| Zfr2_j1          | 0.130203  | 0         | 0             | 1         | 1        |
| Matk_j2          | 0.635437  | 0.791383  | 0             | 1         | 1        |
| Pip5k1c_j1       | 14.9249   | 16.9514   | 0             | 1         | 1        |
| Aes_j4           | 88.9268   | 108.59    | 0             | 1         | 1        |
| Ankrd24_j5       | 0.225402  | 0.104408  | 0             | 1         | 1        |
| BC062115_j4      | 0.470128  | 0.187363  | -1.32722      | 0.0260288 | 0.169159 |
| XLOC_002449      | 0.547916  | 0.497623  | -0.138902     | 0.703198  | 0.891372 |
| XLOC_002451      | 0.1799    | 0.184265  | 0.0345886     | 0.952578  | 0.986299 |
| Mif1_j2          | 0.682687  | 0.446049  | -0.614021     | 0.0391486 | 0.22072  |
| Mif1_j3          | 0.0540378 | 0.0528733 | -0.0314286    | 0.979211  | 1        |
| Tdg_j1           | 1.10172   | 1.08757   | -0.0186513    | 0.947083  | 0.984332 |
| Tdg_j5           | 1.31783   | 1.78376   | 0.436758      | 0.156344  | 0.4898   |
| Tdg_j4           | 5.24279   | 5.98658   | 0.191396      | 0.249426  | 0.596861 |
| Txnrd1_j1        | 0.990053  | 0.685998  | 0             | 1         | 1        |
| Txnrd1_j3        | 6.88728   | 7.63273   | 0             | 1         | 1        |
| A230046K03Rik_j2 | 0.150591  | 0.141276  | 0             | 1         | 1        |
| 1500009L16Rik_j3 | 0.329116  | 0.188795  | -0.80178      | 0.394833  | 0.720038 |
| XLOC_002463      | 0.16188   | 0.0373502 | 0             | 1         | 1        |
| XLOC_002466      | 0.093013  | 0.0588407 | -0.660618     | 0.495166  | 1        |
| Ric8b_j1         | 3.31247   | 3.08334   | 0             | 1         | 1        |
| Btbd11_j2        | 0.67918   | 0.500164  | 0             | 1         | 1        |
| Timp3_j2         | 21.6819   | 25.7852   | 0             | 1         | 1        |
| BC030307_j2      | 0.0802395 | 0         | -1.79769e+308 | 0.0282875 | 1        |
| Nup37            | 1.73388   | 1.61108   | -0.105977     | 0.725489  | 0.902457 |
| Ccdc53_j1        | 0.125865  | 0.064178  | -0.971731     | 0.494764  | 1        |
| XLOC_002486      | 0.144039  | 0.0976948 | -0.560105     | 0.4908    | 0.780098 |
| XLOC_002486      | 0.210371  | 0.0228165 | -3.20479      | 0.182452  | 0.522899 |
| Uhrf1bp1_j2      | 0.0917772 | 0         | -1.79769e+308 | 2.49E-05  | 1        |
| Anks1b_j3        | 2.90791   | 2.08199   | 0             | 1         | 1        |
| Anks1b_j6        | 0.201986  | 1.55026   | 0             | 1         | 1        |



|             |           |                 |            |           |           |
|-------------|-----------|-----------------|------------|-----------|-----------|
| XLOC_002495 | 0.0757261 | 0.0506764       | 0          | 1         | 1         |
| Lta4h_j1    | 1.88206   | 2.28698         | 0.281135   | 0.273802  | 0.622954  |
| Tmcc3_j4    | 0.288599  | 0               | 0          | 1         | 1         |
| Eea1_j3     | 13.185    | 11.8432         | 0          | 1         | 1         |
| Epyc_j3     | 0.500175  | 0.392888        | -0.348315  | 0.316646  | 0.660102  |
| XLOC_002519 | 0.161351  | 0.0299627       | -2.42896   | 0.447355  | 0.754114  |
| XLOC_002519 | 0.0898562 | 0.084847        | -0.0827553 | 0.930376  | 1         |
| XLOC_002519 | 0.0592432 | 0 -1.79769e+308 |            | 0.154325  | 1         |
| Atp2b1_j5   | 0.353041  | 0.241468        | 0          | 1         | 1         |
| Kitlg_j2    | 1.92397   | 0.912078        | 0          | 1         | 1         |
| Kitlg_j4    | 1.46028   | 0.928566        | 0          | 1         | 1         |
| Cep290_j2   | 0.102012  | 0.091746        | -0.153016  | 0.733549  | 1         |
| Mgat4c_j1   | 0.278366  | 0 -1.79769e+308 |            | 7.43E-08  | 4.18E-06  |
| Mgat4c_j4   | 0.195982  | 9.59E-05        | -10.9965   | 0.882001  | 0.962591  |
| Slc6a15_j1  | 0.104716  | 0.0544877       | -0.942485  | 0.483587  | 1         |
| Ppfia2_j4   | 0.107239  | 0.40983         | 1.9342     | 5.69E-05  | 0.0013314 |
| Ppfia2_j7   | 0.752192  | 0.795068        | 0.0799766  | 0.775492  | 0.923807  |
| Ppfia2_j12  | 0.716949  | 1.47874         | 1.04442    | 0.0173167 | 0.127428  |
| Lin7a_j4    | 5.46656   | 5.35749         | 0          | 1         | 1         |
| XLOC_002533 | 0.136204  | 0.048282        | 0          | 1         | 1         |
| XLOC_002536 | 0.163475  | 0.0973651       | -0.747598  | 0.291274  | 0.638477  |
| Csrp2_j2    | 7.08634   | 8.81573         | 0.315039   | 0.118461  | 0.428505  |
| Nap1l1_j5   | 0.581443  | 0.554988        | 0          | 1         | 1         |
| Nap1l1_j10  | 10.4118   | 7.74968         | 0          | 1         | 1         |
| Nap1l1_j9   | 11.6049   | 9.52523         | 0          | 1         | 1         |
| Zfc3h1_j3   | 2.65067   | 2.14074         | 0          | 1         | 1         |
| AK020834_j1 | 0.535522  | 0.366963        | 0          | 1         | 1         |
| Ptprj1      | 0.472923  | 0.697926        | 0          | 1         | 1         |
| Ptprb_j3    | 0.25665   | 0.401978        | 0          | 1         | 1         |
| Best3_j1    | 0.150862  | 0.0487833       | -1.62877   | 0.154557  | 0.487727  |
| Cpm         | 0.0378541 | 0.0962496       | 1.34633    | 0.3058    | 1         |
| Cpm_j2      | 0.0872809 | 6.46E-05        | -10.4002   | 0.956155  | 1         |
| XLOC_002559 | 0.0879829 | 0.0848086       | -0.053012  | 0.964005  | 1         |
| XLOC_002559 | 0.175698  | 0.0514459       | -1.77197   | 0.225764  | 0.572899  |
| Mdm1_j4     | 0.0594306 | 0 -1.79769e+308 |            | 0.0145266 | 1         |
| Mdm1_j9     | 0.307016  | 0.258196        | -0.249847  | 0.643424  | 0.862412  |
| Grip1_j2    | 1.68096   | 2.20635         | 0          | 1         | 1         |
| Llph_j5     | 0.0648394 | 0.0570685       | -0.184176  | 0.878027  | 1         |
| Ppm1h_j2    | 7.63364   | 2.065           | 0          | 1         | 1         |
| XLOC_002576 | 0.166905  | 0.0340818       | -2.29196   | 0.043055  | 0.235284  |
| Avil_j7     | 37.4516   | 23.8535         | 0          | 1         | 1         |
| Avil_j14    | 134.629   | 152.931         | 0          | 1         | 1         |
| Cdk4_j1     | 6.85264   | 7.86661         | 0          | 1         | 1         |
| Agap2_j1    | 0.363175  | 0.272779        | -0.412933  | 0.40234   | 0.725446  |
| XLOC_002582 | 0.10872   | 0.0119755       | -3.18246   | 0.278297  | 1         |
| Dctn2_j2    | 65.5488   | 108.845         | 0          | 1         | 1         |
| R3hdm2_j1   | 2.54896   | 1.55216         | 0          | 1         | 1         |

|                   |           |                       |            |           |          |
|-------------------|-----------|-----------------------|------------|-----------|----------|
| R3hdm2_j4         | 0         | 0.708949              | 0          | 1         | 1        |
| R3hdm2_j10        | 0.14742   | 0.022612              | 0          | 1         | 1        |
| R3hdm2_j12        | 0.731697  | 0.548442              | 0          | 1         | 1        |
| Stac3_j4          | 0.12968   | 0.0705946             | -0.87733   | 0.467963  | 1        |
| Stac3_j7          | 0.086449  | 0.0579718             | -0.576499  | 0.699051  | 1        |
| Stat6_j1          | 0.127674  | 0 -1.79769e+308       | 0.0022564  |           | 1        |
| Stat6_j3          | 1.2738    | 2.99667               | 1.23422    | 4.92E-08  | 2.90E-06 |
| Myo1a_j2          | 0.3315    | 0.373686              | 0          | 1         | 1        |
| Prim1_j4          | 0         | 0.167262 1.79769e+308 | 0.0435868  | 0.237208  |          |
| Naca_j3           | 0.332947  | 0.129934              | -1.35752   | 0.0954604 | 0.381463 |
| Baz2a_j3          | 0.397669  | 0.493451              | 0.31134    | 0.177911  | 0.517237 |
| Baz2a_j8          | 2.14276   | 2.17525               | 0.0217074  | 1         | 1        |
| Timeless_j1       | 0.338224  | 0.200568              | -0.753888  | 0.0708787 | 0.320021 |
| Pan2              | 1.9769    | 2.40644               | 0.283662   | 0.103271  | 0.398343 |
| Smarcc2_j1        | 0.0770143 | 0.0398912             | 0          | 1         | 1        |
| Wibg              | 1.57806   | 1.59017               | 0          | 1         | 1        |
| 1110005A23Rik_j1  | 2.92616   | 2.70667               | 0          | 1         | 1        |
| 1110005A23Rik_j3  | 0.190175  | 0                     | 0          | 1         | 1        |
| Cd63_j2           | 0.0489672 | 0.147685              | 1.59263    | 0.189274  | 1        |
| Cd63_j4           | 0.143113  | 0.0564628             | -1.34178   | 0.47029   | 0.768077 |
| Itga7_j6          | 0.119906  | 0.200168              | 0          | 1         | 1        |
| Esr1_j3           | 0.0683904 | 0.0200452             | 0          | 1         | 1        |
| 1700052N19Rik_j1  | 2.07999   | 2.07995               | -2.46E-05  | 0.999919  | 0.99994  |
| Akap12_j1         | 71.9371   | 74.6764               | 0          | 1         | 1        |
| Akap12_j2         | 0.512146  | 0.260232              | 0          | 1         | 1        |
| Plekhg1_j1        | 1.02297   | 0.759336              | 0          | 1         | 1        |
| Pcmt1_j3          | 16.2449   | 16.8295               | 0          | 1         | 1        |
| Pcmt1_j4          | 0.874289  | 0.417551              | 0          | 1         | 1        |
| Tab2_j2           | 4.96774   | 5.549                 | 0          | 1         | 1        |
| Sash1_j3          | 2.69892   | 2.63325               | 0          | 1         | 1        |
| Sash1_j1          | 0.84041   | 0.680848              | 0          | 1         | 1        |
| 9130014G24Rik_j13 | 0.110529  | 0.0298384             | -1.88919   | 0.0752293 | 1        |
| Rab32_j1          | 0.462307  | 0.375598              | -0.299662  | 0.583268  | 0.833121 |
| Utrn_j1           | 0.0982464 | 0.146896              | 0          | 1         | 1        |
| XLOC_002655       | 0.217991  | 0.0489005             | -2.15634   | 0.255903  | 0.604659 |
| Rps12_j2          | 0.654748  | 0.838952              | 0.35765    | 0.567991  | 0.825207 |
| Rps12_j3          | 1.73922   | 1.64849               | -0.0772942 | 0.85268   | 0.953301 |
| Rps12_j9          | 0.120691  | 0 -1.79769e+308       | 0.0267356  |           | 1        |
| Rps12_j12         | 1.08631   | 0.743211              | -0.54759   | 0.414629  | 0.732858 |
| Enpp1             | 0.294282  | 0.12884               | -1.19161   | 0.0137372 | 0.108008 |
| Enpp3_j2          | 0.0847935 | 0 -1.79769e+308       | 0.0038843  |           | 1        |
| Akap7_j4          | 0.394026  | 0.293174              | -0.426535  | 0.353711  | 0.68999  |
| Tmem200a          | 0.603194  | 0.284386              | -1.08477   | 0.0116516 | 0.095923 |
| L3mbtl3_j5        | 0.126475  | 0                     | 0          | 1         | 1        |
| L3mbtl3_j6        | 0.112748  | 0                     | 0          | 1         | 1        |
| Lama2_j14         | 0.421447  | 0.192729              | -1.12878   | 1         | 1        |
| Rnf146            | 2.18784   | 2.57919               | 0          | 1         | 1        |

|             |           |             |               |           |           |
|-------------|-----------|-------------|---------------|-----------|-----------|
| Rspo3       | 0.105107  | 0.0785876   | -0.419486     | 0.630341  | 1         |
| Nkain2_j3   | 0.169089  | 0           | -1.79769e+308 | 0.166392  | 0.502925  |
| Zufsp_j1    | 0.480851  | 0.591129    | 0.297882      | 0.524743  | 0.800294  |
| Rwdd1_j5    | 0.0767641 | 0.0402177   | 0             | 1         | 1         |
| Fam26f      | 0.168124  | 0.228605    | 0.44333       | 0.479927  | 0.773896  |
| Wisp3_j3    | 0.133092  | 0.0670838   | -0.988387     | 0.29365   | 1         |
| Gm16365_j1  | 3.44949   | 1.26654     | 0             | 1         | 1         |
| Slc16a10    | 0.207885  | 0.138159    | -0.589456     | 0.571597  | 0.826975  |
| Rpf2_j6     | 1.26083   | 1.34118     | 0             | 1         | 1         |
| Smpd2       | 1.40754   | 1.39548     | -0.0124196    | 0.926632  | 0.977293  |
| Ccdc162_j1  | 0.0700118 | 0           | -1.79769e+308 | 0.0410673 | 1         |
| Ccdc162_j9  | 0.456857  | 0.474659    | 0.0551487     | 0.875945  | 0.960645  |
| Ccdc162_j14 | 0.224624  | 0.0572928   | -1.97109      | 0.145703  | 0.473678  |
| Armc2_j3    | 0.558071  | 0.463609    | -0.267541     | 0.590951  | 0.836786  |
| Armc2_j6    | 0.162893  | 0.0386756   | -2.07442      | 0.286907  | 0.635515  |
| Armc2       | 0.220895  | 0.415135    | 0.910222      | 0.219954  | 0.566699  |
| XLOC_002742 | 0.445214  | 0.318704    | -0.482281     | 0.319178  | 0.662544  |
| Lin28b_j11  | 0.118993  | 0           | -1.79769e+308 | 1.22E-05  | 1         |
| Lin28b_j12  | 0.178568  | 0.000110162 | -10.6626      | 0.775245  | 0.923761  |
| Grik2_j7    | 0.861778  | 0.383951    | 0             | 1         | 1         |
| Mcm9_j1     | 1.3338    | 1.33902     | 0.0056336     | 0.977577  | 0.993541  |
| Serinc1_j1  | 2.33857   | 0.94966     | 0             | 1         | 1         |
| XLOC_002759 | 0.0899577 | 0.0792863   | -0.182175     | 0.87173   | 1         |
| Ccdc109a_j2 | 7.57667   | 4.60247     | 0             | 1         | 1         |
| XLOC_002765 | 0.986246  | 0           | 0             | 1         | 1         |
| Chst3_j2    | 0.106593  | 0.194365    | 0.866662      | 0.0817447 | 0.348325  |
| Adamts14_j4 | 0.383177  | 0.38149     | -0.0063638    | 0.987747  | 0.996374  |
| Adamts14_j5 | 0.0723731 | 0.0275914   | -1.39123      | 0.493676  | 1         |
| X99384_j5   | 1.412     | 1.79677     | 0             | 1         | 1         |
| Col13a1_j5  | 0.0801914 | 0           | -1.79769e+308 | 0.0074479 | 1         |
| Col13a1_j4  | 0.136608  | 0           | -1.79769e+308 | 0.0002069 | 1         |
| Hk1_j4      | 67.4924   | 73.4986     | 0             | 1         | 1         |
| Ddx50_j2    | 3.3901    | 2.19599     | 0             | 1         | 1         |
| Stox1_j3    | 0.110727  | 0.049888    | -1.15024      | 0.360481  | 1         |
| Ccar1_j3    | 2.27668   | 0.583393    | 0             | 1         | 1         |
| Zfp365_j2   | 4.78042   | 4.92254     | 0             | 1         | 1         |
| Phyhipl_j3  | 0.139044  | 0.161498    | 0             | 1         | 1         |
| Al646023_j2 | 25.2999   | 19.1545     | 0             | 1         | 1         |
| Susd2_j3    | 10.0303   | 13.3384     | 0.411227      | 0.0001811 | 0.0035326 |
| Cabin1_j5   | 0.635259  | 0           | 0             | 1         | 1         |
| Gstt2_j3    | 0.800514  | 0.704054    | -0.185239     | 0.664807  | 0.873063  |
| Mmp11_j2    | 0.131905  | 0.0765649   | -0.784739     | 0.480465  | 1         |
| Mmp11_j3    | 0.467991  | 0.449186    | -0.0591663    | 0.866985  | 0.957889  |
| Pcnt        | 0.248547  | 0.178516    | 0             | 1         | 1         |
| Ybey_j1     | 0.362996  | 0           | -1.79769e+308 | 5.89E-15  | 1.16E-12  |
| Pcbp3_j11   | 0.369327  | 0.138085    | 0             | 1         | 1         |
| Pcbp3_j12   | 13.1148   | 13.3408     | 0             | 1         | 1         |

|                  |           |                 |             |           |           |
|------------------|-----------|-----------------|-------------|-----------|-----------|
| Pcbp3_j13        | 0.409034  | 0.0414651       | 0           | 1         | 1         |
| Adarb1_j3        | 0.167942  | 0               | 0           | 1         | 1         |
| Lrrc3_j3         | 0.413389  | 0.261562        | 0           | 1         | 1         |
| Pwp2_j2          | 1.99576   | 2.68783         | 0           | 1         | 1         |
| Pwp2_j3          | 0.409101  | 0.895912        | 0           | 1         | 1         |
| Rrp1_j3          | 50.54     | 47.4641         | 0           | 1         | 1         |
| Syde1_j2         | 2.33972   | 2.46941         | 0           | 1         | 1         |
| 2610008E11Rik_j1 | 0.863279  | 0.533805        | 0           | 1         | 1         |
| Shc2_j5          | 1.74375   | 2.88462         | 0           | 1         | 1         |
| Polrmt_j3        | 0.969161  | 0.638066        | -0.603032   | 0.0572985 | 0.280528  |
| Sbno2_j1         | 8.10812   | 10.9548         | 0           | 1         | 1         |
| Dos_j5           | 3.56916   | 3.47079         | 0           | 1         | 1         |
| Pcsk4_j5         | 0.0845514 | 0 -1.79769e+308 | 0.0085551   |           | 1         |
| Pcsk4_j3         | 0.0732781 | 0.0590277       | -0.311992   | 0.77741   | 1         |
| Adamts15_j7      | 0.194939  | 0 -1.79769e+308 | 6.75E-05    | 0.0015403 |           |
| Adamts15_j10     | 0.572974  | 0.482002        | -0.249432   | 0.685345  | 0.882587  |
| Uqcr             | 3.15669   | 3.68978         | 0.225119    | 0.6281    | 0.855168  |
| Tcf3_j1          | 0.179796  | 0.0495969       | 0           | 1         | 1         |
| Mobkl2a_j3       | 0.203546  | 0.385084        | 0.919814    | 0.10259   | 0.396835  |
| Jsrp1_j4         | 0.198798  | 0.221773        | 0.157774    | 0.860152  | 0.955759  |
| Slc39a3_j1       | 33.4248   | 31.8505         | 0           | 1         | 1         |
| Atcay_j5         | 2.36864   | 1.22818         | 0           | 1         | 1         |
| Gipc3_j1         | 0.135341  | 0.0304992       | -2.14976    | 0.0735775 | 1         |
| Hmg20b_j2        | 2.12915   | 0.44216         | 0           | 1         | 1         |
| Celf5_j1         | 0.117168  | 0.379297        | 0           | 1         | 1         |
| Celf5_j2         | 0.181455  | 0               | 0           | 1         | 1         |
| Celf5            | 0.816451  | 0.738573        | 0           | 1         | 1         |
| Ncln_j1          | 5.74347   | 6.52061         | 0           | 1         | 1         |
| Ncln_j2          | 1.18213   | 1.7225          | 0           | 1         | 1         |
| S1pr4            | 0.244652  | 0.327535        | 0.420918    | 0.26971   | 0.618771  |
| Zfp781_j1        | 0.968977  | 0.552392        | -0.81077    | 0.266604  | 0.61561   |
| AK136722_j1      | 0.188529  | 0.0597932       | -1.65673    | 0.184678  | 0.525051  |
| Zfp938           | 1.64484   | 1.43445         | -0.197448   | 0.495809  | 0.782958  |
| XLOC_002912      | 0.154067  | 0.153268        | -0.00749842 | 0.991324  | 0.997429  |
| XLOC_002912      | 0.0633398 | 0.0143859       | -2.13846    | 0.306338  | 1         |
| Slc41a2_j6       | 6.77035   | 8.83581         | 0           | 1         | 1         |
| Slc41a2_j3       | 3.60948   | 5.48911         | 0           | 1         | 1         |
| XLOC_002918      | 0.147749  | 0.0663036       | -1.15599    | 0.147913  | 0.476603  |
| XLOC_002918      | 0.0551698 | 0 -1.79769e+308 | 0.0541449   |           | 1         |
| Appl2_j3         | 1.06177   | 0.446156        | 0           | 1         | 1         |
| XLOC_002921      | 46.076    | 62.4449         | 0.43857     | 5.72E-05  | 0.0013364 |
| Fhl4             | 0.291706  | 0.277897        | -0.0699675  | 0.880374  | 0.9619    |
| Syn3             | 0.187889  | 0.202279        | 0           | 1         | 1         |
| Dram1            | 0.193485  | 0.462186        | 1.25625     | 0.0043282 | 0.045562  |
| Dram1_j3         | 0.0765152 | 0 -1.79769e+308 | 0.0120046   |           | 1         |
| XLOC_002936      | 0.238281  | 0 -1.79769e+308 | 8.96E-06    | 0.0002828 |           |
| XLOC_002936      | 1.17955   | 1.63343         | 0.469659    | 0.0314258 | 0.191514  |

|                  |            |                 |           |           |           |
|------------------|------------|-----------------|-----------|-----------|-----------|
| Chpt1_j2         | 1.29209    | 1.38658         | 0.101824  | 0.561995  | 0.821917  |
| Chpt1            | 5.6377     | 4.95761         | -0.185464 | 0.19433   | 0.536757  |
| Utp20_j2         | 0.768751   | 0.769508        | 0         | 1         | 1         |
| Utp20_j3         | 0.189408   | 0.110656        | 0         | 1         | 1         |
| Ano4_j2          | 0.0926307  | 0.0897254       | 0         | 1         | 1         |
| Ano4_j3          | 1.23706    | 0.082148        | 0         | 1         | 1         |
| Gas2l3_j4        | 0.74408    | 0.546094        | 0         | 1         | 1         |
| Gas2l3           | 0.739257   | 0.284817        | 0         | 1         | 1         |
| Slc17a8_j2       | 0.0455328  | 0.177639        | 1.96397   | 0.0428875 | 0.234605  |
| Scyl2_j3         | 0.748318   | 1.40138         | 0         | 1         | 1         |
| Scyl2_j5         | 1.22048    | 2.45787         | 0         | 1         | 1         |
| Scyl2            | 2.08261    | 1.81725         | 0         | 1         | 1         |
| Apaf1_j5         | 0.00309287 | 0.0842195       | 0         | 1         | 1         |
| XLOC_002949      | 3.16985    | 3.46092         | 0.12674   | 0.590051  | 0.836402  |
| BC065048_j3      | 0.0612618  | 0.0840238       | 0.455811  | 0.661291  | 1         |
| 4930485B16Rik_j2 | 0.181729   | 0.0103202       | -4.13824  | 0.399359  | 0.723009  |
| 4930485B16Rik_j3 | 0.117925   | 0.0818954       | -0.526012 | 0.517821  | 1         |
| Metap2_j3        | 10.8803    | 10.1479         | 0         | 1         | 1         |
| Vezt_j7          | 3.45046    | 2.68014         | 0         | 1         | 1         |
| 4932415G12Rik_j2 | 0.0984304  | 0.161246        | 0.712089  | 0.16514   | 0.501501  |
| 4932415G12Rik_j5 | 6.30844    | 5.39917         | -0.224546 | 0.0774772 | 0.336968  |
| Plxnc1_j2        | 14.5387    | 14.3194         | 0         | 1         | 1         |
| Gm10754_j1       | 0.208907   | 0.081343        | -1.36077  | 0.019611  | 0.13906   |
| Gm10754_j2       | 0.312893   | 0.0520515       | -2.58766  | 0.0001681 | 0.0033206 |
| Gm10754          | 1.06599    | 0.537896        | -0.98679  | 6.92E-06  | 0.0002249 |
| Tmtc3_j1         | 0.192997   | 0.0439893       | 0         | 1         | 1         |
| Nts_j2           | 0.592219   | 0.271707        | -1.12408  | 0.143419  | 0.470568  |
| XLOC_002976      | 0.423187   | 0.305267        | -0.471222 | 0.401122  | 0.72452   |
| Lrriq1_j7        | 0.059391   | 0 -1.79769e+308 |           | 0.0002678 | 1         |
| Tmtc2_j1         | 1.4575     | 0 -1.79769e+308 |           | 1.87E-19  | 5.20E-17  |
| BC067068_j1      | 2.19083    | 1.7138          | -0.354276 | 0.128305  | 0.446425  |
| Acss3_j2         | 0.100071   | 0 -1.79769e+308 |           | 7.92E-05  | 1         |
| Ptprq_j1         | 0.109509   | 0.085813        | -0.351783 | 0.649426  | 1         |
| Syt1_j2          | 0          | 0.142897        | 0         | 1         | 1         |
| Nav3_j4          | 0.0831774  | 0 -1.79769e+308 |           | 2.29E-06  | 1         |
| Zdhhc17_j4       | 1.30559    | 1.12439         | 0         | 1         | 1         |
| Glipr1_j1        | 0.612106   | 0.481785        | -0.345393 | 0.389391  | 0.71658   |
| Rab21_j1         | 18.9871    | 17.581          | 0         | 1         | 1         |
| Tmem19_j3        | 5.13844    | 3.55956         | 0         | 1         | 1         |
| Cnot2_j2         | 1.08614    | 0.97177         | 0         | 1         | 1         |
| Cnot2_j3         | 2.61654    | 2.2571          | 0         | 1         | 1         |
| Lyz2             | 15.4172    | 27.7195         | 0         | 1         | 1         |
| Cpsf6_j4         | 3.50953    | 3.65151         | 0.0572174 | 0.673251  | 0.876795  |
| Nup107_j1        | 2.63194    | 3.2782          | 0.316775  | 0.217789  | 0.563903  |
| Cand1_j2         | 0.120527   | 0.0212962       | 0         | 1         | 1         |
| Helb_j3          | 0.686348   | 0.246627        | -1.47661  | 0.0043164 | 0.0454931 |
| Xpot_j2          | 2.06258    | 2.92589         | 0         | 1         | 1         |

|              |           |           |               |           |           |
|--------------|-----------|-----------|---------------|-----------|-----------|
| Srgap1_j1    | 0.174677  | 0.15842   | 0             | 1         | 1         |
| Mon2_j3      | 0.190371  | 0         | -1.79769e+308 | 5.92E-05  | 0.001372  |
| Mon2_j6      | 1.79439   | 1.73724   | -0.046697     | 0.800225  | 0.933436  |
| Slc16a7_j4   | 0.304647  | 0         | 0             | 1         | 1         |
| Xrcc6bp1     | 0.244279  | 0.200273  | -0.286561     | 0.650146  | 0.865671  |
| Os9_j4       | 26.61     | 33.261    | 0.321865      | 0.0007885 | 0.0118474 |
| Arhgef25_j7  | 0.528197  | 0.657929  | 0             | 1         | 1         |
| Dtx3_j10     | 1.33427   | 0         | 0             | 1         | 1         |
| Dtx3_j11     | 2.3885    | 6.50126   | 0             | 1         | 1         |
| Dtx3_j1      | 0         | 0.24152   | 0             | 1         | 1         |
| Dtx3_j12     | 1.62102   | 0.715209  | 0             | 1         | 1         |
| Gli1_j3      | 0.169696  | 0         | -1.79769e+308 | 4.58E-06  | 0.0001562 |
| Lrp1_j1      | 0.300214  | 0.310962  | 0             | 1         | 1         |
| Nab2_j1      | 0.608004  | 0.617444  | 0             | 1         | 1         |
| Gpr182       | 0.0783696 | 0.0813104 | 0.0531451     | 0.96023   | 1         |
| Myl6_j1      | 2.18144   | 2.36574   | 0             | 1         | 1         |
| Myl6b_j1     | 2.35017   | 2.27046   | 0             | 1         | 1         |
| Rpl41_j1     | 0         | 0.142145  | 0             | 1         | 1         |
| Rpl41_j2     | 0.143785  | 0         | 0             | 1         | 1         |
| Rps26_j5     | 0.150468  | 0.276277  | 0.876656      | 0.556742  | 0.819233  |
| Ikzf4_j2     | 0.11912   | 0.0583158 | -1.03045      | 0.26816   | 1         |
| Cdk2_j4      | 0.128247  | 0         | -1.79769e+308 | 0.0034988 | 1         |
| Dgka_j9      | 1.18465   | 0.699723  | 0             | 1         | 1         |
| Dgka_j2      | 2.51713   | 2.52724   | 0             | 1         | 1         |
| Vmn2r87_j2   | 0.219961  | 0.0995844 | -1.14326      | 0.512777  | 0.7923    |
| Rmnd1_j8     | 0.0284502 | 0.0661896 | 1.21816       | 0.215451  | 1         |
| Plagl1_j6    | 1.13105   | 1.24264   | 0             | 1         | 1         |
| Hivep2_j4    | 0.536693  | 1.36461   | 1.34632       | 5.15E-12  | 6.57E-10  |
| Perp_j1      | 2.1375    | 2.49154   | 0.221115      | 0.355388  | 0.691408  |
| AK044491_j3  | 0.257464  | 0.240587  | -0.0978072    | 0.864224  | 0.95676   |
| AK044491_j4  | 0         | 0.0985114 | 1.79769e+308  | 0.0569674 | 1         |
| Map3k5_j3    | 2.39592   | 2.3572    | 0             | 1         | 1         |
| Mtap7_j3     | 1.47906   | 1.29134   | 0             | 1         | 1         |
| Mtap7_j8     | 2.35676   | 2.52903   | 0             | 1         | 1         |
| Mtap7_j9     | 0         | 0.177136  | 0             | 1         | 1         |
| Ahi1_j2      | 0.825139  | 1.08222   | 0.391286      | 0.113063  | 0.418521  |
| Epb4.1l2_j10 | 4.49416   | 5.4817    | 0.28657       | 0.2365    | 0.583692  |
| Arhgap18_j1  | 0.089273  | 0.110976  | 0.313949      | 0.6456    | 1         |
| Ptprk        | 0.196248  | 0.447967  | 1.19072       | 0.0007971 | 0.0119547 |
| Hs3st5_j1    | 0.515568  | 0.553835  | 0             | 1         | 1         |
| Hdac2_j2     | 24.4032   | 19.9034   | 0             | 1         | 1         |
| Lama4_j4     | 4.5554    | 5.0019    | 0.134899      | 0.392805  | 0.718937  |
| Fyn_j2       | 0         | 0.112849  | 0             | 1         | 1         |
| Cdk19_j1     | 1.40767   | 1.2084    | 0             | 1         | 1         |
| Mical1_j1    | 0.154083  | 0.220407  | 0.516464      | 0.339131  | 0.679419  |
| Sesn1        | 1.14041   | 0.99149   | 0             | 1         | 1         |
| Ostm1_j2     | 8.60151   | 8.17329   | 0             | 1         | 1         |

|                  |             |           |              |           |           |
|------------------|-------------|-----------|--------------|-----------|-----------|
| XLOC_002269      | 0.0776097   | 0.0656501 | -0.24144     | 0.797013  | 1         |
| Bend3_j1         | 6.78E-05    | 0.383724  | 0            | 1         | 1         |
| Cd24a_j1         | 0.907764    | 1.21622   | 0.422017     | 0.21006   | 0.554604  |
| Cd24a_j3         | 3.90998     | 1.39971   | -1.48204     | 1.92E-06  | 7.31E-05  |
| XLOC_002275      | 0.0878162   | 0.0405228 | -1.11575     | 0.488585  | 1         |
| XLOC_002275      | 0.072528    | 0.077893  | 0.102957     | 0.917227  | 1         |
| Rtn4ip1_j1       | 0.481097    | 0.447455  | -0.104586    | 0.79744   | 0.932685  |
| Rtn4ip1_j4       | 0.160856    | 0.0824307 | -0.96452     | 0.220065  | 0.566862  |
| Prep_j2          | 4.77365     | 7.02654   | 0            | 1         | 1         |
| Hace1_j1         | 2.69458     | 3.20441   | 0.249995     | 0.301243  | 0.647609  |
| Nus1_j1          | 1.86743     | 1.75362   | 0            | 1         | 1         |
| Pln_j1           | 0.0672586   | 0.0437508 | 0            | 1         | 1         |
| Gja1             | 0.000482841 | 0.745701  | 0            | 1         | 1         |
| Gja1_j1          | 5.61127     | 4.75717   | 0            | 1         | 1         |
| Hsf2_j2          | 0           | 1.47077   | 1.79769e+308 | 1.88E-09  | 1.51E-07  |
| Fabp7_j1         | 66.5282     | 48.326    | 0            | 1         | 1         |
| XLOC_002299      | 0.0432474   | 0.0648735 | 0            | 1         | 1         |
| Ranbp2_j2        | 0.000811394 | 0.20241   | 0            | 1         | 1         |
| Ccdc138_j10      | 0.673187    | 0.884704  | 0.394188     | 0.45145   | 0.756717  |
| Ankrd57          | 2.87022     | 3.92176   | 0.450339     | 0.0007326 | 0.011132  |
| Pla2g12b         | 0.131579    | 0.18284   | 0.474654     | 0.55691   | 0.819299  |
| Cbara1_j2        | 9.80021     | 8.11627   | -0.271997    | 0.029149  | 0.182103  |
| Lrrc20_j7        | 3.88853     | 4.39996   | 0            | 1         | 1         |
| Slc25a16_j1      | 7.25385     | 5.90035   | 0            | 1         | 1         |
| Ctnna3_j1        | 0.11548     | 0.15378   | 0.413233     | 0.671413  | 1         |
| Jmjd1c_j6        | 0.209657    | 0.432414  | 1.04438      | 0.0010078 | 0.0144055 |
| Jmjd1c_j9        | 0.365166    | 0.558829  | 0.613854     | 0.0260543 | 0.169235  |
| Jmjd1c_j10       | 3.20334     | 3.32598   | 0.0542023    | 0.765988  | 0.920126  |
| Egr2             | 0           | 0.102079  | 1.79769e+308 | 0.0218315 | 1         |
| Egr2_j3          | 0.192251    | 0.61644   | 1.68097      | 0.0005961 | 0.0094375 |
| Fam13c_j3        | 1.6641      | 1.39913   | 0            | 1         | 1         |
| Pcdh15_j1        | 1.38E-06    | 0.0495247 | 15.1347      | 0.998005  | 1         |
| Gnaz_j3          | 0.505798    | 1.63278   | 0            | 1         | 1         |
| Specc1l_j4       | 12.9302     | 16.3524   | 0            | 1         | 1         |
| Adora2a_j2       | 0           | 0.206271  | 1.79769e+308 | 0.003822  | 0.0415444 |
| Adora2a_j5       | 0.873595    | 0.745701  | -0.228367    | 0.553533  | 0.81725   |
| S100b_j2         | 0.187415    | 0.169744  | 0            | 1         | 1         |
| Lss_j3           | 1.38861     | 2.15166   | 0            | 1         | 1         |
| Slc19a1          | 1.23896     | 0.970305  | -0.352619    | 0.0459369 | 0.245257  |
| C330046G03Rik_j4 | 0.0685168   | 0.131867  | 0.944554     | 0.506524  | 1         |
| Slc1a6_j1        | 0.309838    | 0.216301  | -0.518477    | 0.446316  | 0.753343  |
| Gm16517_j3       | 1.27496     | 1.28624   | 0.0127106    | 0.980343  | 0.994006  |
| Gzmm_j3          | 1.60756     | 1.33312   | -0.270066    | 0.251248  | 0.599096  |
| Cdc34_j2         | 28.0408     | 34.0858   | 0.281646     | 0.0150858 | 0.115367  |
| Fgf22_j1         | 0.105705    | 0.0585448 | 0            | 1         | 1         |
| XLOC_002393      | 0.0594348   | 0.0633465 | 0.0919564    | 0.93456   | 1         |
| 9130017N09Rik_j4 | 0.187256    | 0.323329  | 0.787989     | 0.143737  | 0.470722  |

|                  |             |           |              |           |           |
|------------------|-------------|-----------|--------------|-----------|-----------|
| Ptbp1_j7         | 2.48874     | 2.18283   | 0            | 1         | 1         |
| Ptbp1_j8         | 1.36456     | 1.56396   | 0            | 1         | 1         |
| Arid3a_j1        | 0.0728915   | 0.527878  | 2.85638      | 0.0004687 | 0.0077109 |
| Abca7_j6         | 0           | 0.0970472 | 0            | 1         | 1         |
| Abca7_j8         | 4.12877     | 3.20718   | 0            | 1         | 1         |
| Hmha1_j8         | 0.172036    | 0.401889  | 1.22409      | 0.006089  | 0.0592713 |
| Gpx4_j2          | 0.047079    | 0.154189  | 1.71154      | 0.0001632 | 1         |
| Dazap1_j2        | 1.40926     | 0.793986  | -0.827753    | 0.0286941 | 0.180302  |
| Rps15            | 2.58301     | 2.89273   | 0.16338      | 0.559602  | 0.82076   |
| Apc2_j4          | 1.94165     | 3.03341   | 0.643656     | 1.32E-06  | 5.27E-05  |
| Reep6_j1         | 0.0624052   | 0.0809115 | 0.37468      | 0.782266  | 1         |
| Sf3a2            | 6.01525     | 6.03069   | 0.00369657   | 0.976471  | 0.993154  |
| Amh_j1           | 3.58E-06    | 0.203145  | 15.7924      | 0.99757   | 0.999228  |
| Sspl2b_j6        | 0.296281    | 0.424163  | 0.517654     | 0.36662   | 0.700205  |
| Tmprss9_j2       | 4.69852     | 5.20653   | 0.148116     | 0.341842  | 0.681683  |
| XLOC_002425      | 0.0471197   | 0.0746226 | 0.663282     | 0.615249  | 1         |
| XLOC_002428      | 0.1274      | 0.189909  | 0.575949     | 0.546728  | 0.81317   |
| Eef2_j1          | 0.829219    | 0.987139  | 0.2515       | 0.404461  | 0.726779  |
| Zfr2_j5          | 4.73836     | 5.34455   | 0            | 1         | 1         |
| Matk_j1          | 0.872959    | 0.795201  | 0            | 1         | 1         |
| 2210404007Rik_j1 | 0.0387637   | 0.0583479 | 0.589973     | 0.736173  | 1         |
| Aes_j2           | 0.653104    | 2.04634   | 0            | 1         | 1         |
| Aes_j1           | 120.352     | 121.089   | 0            | 1         | 1         |
| Ankrd24_j3       | 0.0609001   | 0.0939717 | 0            | 1         | 1         |
| Ankrd24_j2       | 0.0435592   | 0.0698622 | 0            | 1         | 1         |
| Ankrd24_j16      | 1.2081      | 1.04675   | 0            | 1         | 1         |
| BC062115_j2      | 0.000149148 | 0.100851  | 9.40126      | 0.867508  | 1         |
| BC062115_j1      | 0.336199    | 0.218232  | -0.623451    | 0.273288  | 0.62238   |
| XLOC_002449      | 0.118481    | 0.0575238 | -1.04243     | 0.218997  | 1         |
| XLOC_002449      | 0.256055    | 0.277215  | 0.114549     | 0.762044  | 0.918069  |
| AU041133_j3      | 0           | 0.167841  | 1.79769e+308 | 0.0051558 | 0.0518764 |
| Mif1_j1          | 0.247575    | 0.193001  | -0.359263    | 0.537924  | 0.807831  |
| Mif1_j4          | 0.171826    | 0.304789  | 0.826857     | 0.126791  | 0.443479  |
| Tdg_j7           | 0.000208337 | 0.219375  | 10.0403      | 0.828473  | 0.944579  |
| Txnrd1           | 7.76228     | 8.59952   | 0            | 1         | 1         |
| 1500009L16Rik_j2 | 0           | 0.153726  | 1.79769e+308 | 0.0691906 | 1         |
| XLOC_002466      | 0.0898678   | 0.217447  | 1.27479      | 0.0314998 | 0.191821  |
| XLOC_002469      | 0           | 0.102009  | 1.79769e+308 | 0.110811  | 1         |
| Btbd11_j4        | 1.36485     | 1.6242    | 0            | 1         | 1         |
| BC030307_j5      | 0.1155      | 0.0878246 | -0.395189    | 0.718418  | 1         |
| BC030307_j13     | 0.17516     | 0.177539  | 0.0194672    | 0.986737  | 0.99622   |
| Nt5dc3_j1        | 0.184       | 0.371598  | 0            | 1         | 1         |
| Arl1_j3          | 10.755      | 5.50587   | -0.965967    | 8.68E-08  | 4.73E-06  |
| Uhrf1bp1_j6      | 0.409012    | 0.302941  | -0.433108    | 0.387228  | 0.715059  |
| Anks1b_j2        | 1.13347     | 1.27343   | 0            | 1         | 1         |
| XLOC_002495      | 0.233463    | 0.208108  | 0            | 1         | 1         |
| Cdk17_j2         | 4.94109     | 5.77939   | 0            | 1         | 1         |



|             |             |           |               |           |          |
|-------------|-------------|-----------|---------------|-----------|----------|
| Hal_j1      | 0.0327188   | 0.136714  | 2.06296       | 0.0578749 | 1        |
| Ntn4_j1     | 2.93E-05    | 0.169881  | 12.5022       | 0.952115  | 0.986165 |
| Nr2c1_j1    | 0.278463    | 0.349229  | 0.326691      | 0.482323  | 0.775514 |
| Ndufa12_j3  | 28.502      | 28.7687   | 0.0134387     | 0.940207  | 0.981805 |
| Tmcc3_j2    | 0           | 0.11602   | 0             | 1         | 1        |
| Ube2n_j1    | 0.501135    | 0.540322  | 0.10862       | 0.906127  | 0.970304 |
| Eea1_j4     | 0           | 0.145306  | 0             | 1         | 1        |
| XLOC_002519 | 0           | 0.0751563 | 1.79769e+308  | 0.0587176 | 1        |
| Atp2b1_j1   | 16.5063     | 16.2914   | 0             | 1         | 1        |
| Mgat4c_j3   | 8.59E-05    | 0.211369  | 11.2652       | 0.87252   | 0.959686 |
| Slc6a15_j4  | 8.26463     | 10.4789   | 0.342469      | 0.0602098 | 0.288946 |
| Gm15663_j1  | 0.381954    | 0.555473  | 0.540319      | 0.0522632 | 0.265423 |
| Ppfia2_j2   | 0.718996    | 0.724779  | 0.0115578     | 0.967937  | 0.990986 |
| Ppfia2_j14  | 0.0779446   | 0         | -1.79769e+308 | 0.0570653 | 1        |
| XLOC_002532 | 0.137791    | 0.138938  | 0.0119554     | 0.99058   | 0.997044 |
| Lin7a_j1    | 0.141621    | 0.124568  | 0             | 1         | 1        |
| XLOC_002535 | 0.0834366   | 0.125011  | 0.583298      | 0.516921  | 1        |
| Csrp2_j4    | 0.344591    | 0.115603  | -1.5757       | 0.270932  | 0.620012 |
| Osbpl8_j2   | 2.98975     | 5.3325    | 0             | 1         | 1        |
| Nap1l1_j2   | 4.83121     | 5.3478    | 0             | 1         | 1        |
| Nap1l1_j8   | 14.9869     | 15.4721   | 0             | 1         | 1        |
| Kcnc2_j1    | 0.859312    | 0.822532  | -0.0631113    | 0.792862  | 0.931005 |
| Kcnc2_j4    | 0.340125    | 0.255945  | -0.410235     | 0.366476  | 0.700205 |
| Zfc3h1_j1   | 0.114134    | 0.202078  | 0             | 1         | 1        |
| Zfc3h1_j2   | 0.244357    | 0.21316   | 0             | 1         | 1        |
| Ptprb_j1    | 0.195443    | 0.189582  | 0             | 1         | 1        |
| AK016788_j2 | 0.058188    | 0.0499958 | 0             | 1         | 1        |
| AK016788_j6 | 0           | 0.10757   | 0             | 1         | 1        |
| AK016788_j7 | 0.0463175   | 0.151497  | 0             | 1         | 1        |
| Mdm1        | 0.156421    | 0.207027  | 0.404387      | 0.668107  | 0.874424 |
| Mdm1_j10    | 0.149305    | 0.224011  | 0.585302      | 0.353689  | 0.68999  |
| Grip1_j4    | 2.06155     | 2.02655   | 0             | 1         | 1        |
| Ppm1h_j5    | 0.464267    | 0.951405  | 0             | 1         | 1        |
| Ctdsp2_j5   | 5.68741     | 5.85516   | 0             | 1         | 1        |
| Avil_j10    | 34.8871     | 26.5242   | 0             | 1         | 1        |
| Avil_j9     | 0           | 18.5334   | 0             | 1         | 1        |
| XLOC_002582 | 0           | 0.102426  | 1.79769e+308  | 0.0160487 | 1        |
| B4galnt1_j3 | 0.258655    | 0.369311  | 0.513806      | 0.364454  | 0.698412 |
| Dctn2       | 3.70538     | 4.19843   | 0             | 1         | 1        |
| Arhgap9     | 0.000153877 | 0.25334   | 10.6851       | 0.7668    | 0.920508 |
| R3hdm2_j7   | 0.541014    | 0.786009  | 0             | 1         | 1        |
| R3hdm2_j6   | 2.2639      | 2.1346    | 0             | 1         | 1        |
| R3hdm2_j14  | 9.04236     | 8.47498   | 0             | 1         | 1        |
| Stac3_j2    | 0.0858312   | 0.148388  | 0.7898        | 0.307584  | 1        |
| Stat6_j2    | 16.1073     | 18.0877   | 0.167288      | 0.110679  | 0.413967 |
| Tmem194_j2  | 0.120576    | 0.140509  | 0.220714      | 0.701029  | 1        |
| Myo1a_j9    | 1.40044     | 1.97975   | 0             | 1         | 1        |

|                   |            |            |              |           |           |
|-------------------|------------|------------|--------------|-----------|-----------|
| Prim1_j5          | 0          | 0.140993   | 1.79769e+308 | 0.0542607 | 1         |
| Naca_j5           | 0.604584   | 0.714433   | 0.240856     | 0.539466  | 0.808383  |
| Naca_j4           | 1.59314    | 1.6414     | 0.0430569    | 0.871796  | 0.959367  |
| Gls2_j2           | 1.99383    | 2.14892    | 0            | 1         | 1         |
| Timeless_j4       | 2.68155    | 3.41657    | 0.349481     | 0.0681    | 0.312432  |
| Timeless_j3       | 6.18478    | 8.22536    | 0.411357     | 0.0017808 | 0.0227714 |
| Stat2_j1          | 1.51506    | 1.8561     | 0            | 1         | 1         |
| Pan2_j4           | 0.864708   | 0.821374   | -0.0741735   | 0.784725  | 0.927655  |
| Pan2_j10          | 2.64863    | 2.25385    | -0.232856    | 0.291399  | 0.638505  |
| Cs_j2             | 16.1182    | 19.9455    | 0            | 1         | 1         |
| Smarcc2_j3        | 3.82498    | 3.91933    | 0            | 1         | 1         |
| Smarcc2           | 2.83101    | 2.61529    | 0            | 1         | 1         |
| XLOC_002609       | 0.0397846  | 0.0744956  | 0            | 1         | 1         |
| Gm9182            | 1.43812    | 1.83604    | 0.352411     | 0.252928  | 0.600981  |
| Pmel_j1           | 0.119235   | 0.145825   | 0.290428     | 0.739517  | 1         |
| Pmel_j2           | 0.180771   | 0.155421   | -0.217982    | 0.76814   | 0.921044  |
| 1110005A23Rik_j4  | 1.91039    | 1.84595    | 0            | 1         | 1         |
| Cd63_j1           | 0          | 0.110495   | 1.79769e+308 | 0.0740043 | 1         |
| Cd63_j3           | 0.724535   | 1.28574    | 0.827468     | 0.0221312 | 0.151104  |
| Cd63_j12          | 0          | 0.192007   | 1.79769e+308 | 0.067338  | 0.310319  |
| ltga7_j7          | 2.39921    | 3.28163    | 0            | 1         | 1         |
| Esr1              | 0.281821   | 0.205588   | 0            | 1         | 1         |
| Akap12_j8         | 0          | 0.445177   | 0            | 1         | 1         |
| BC013529          | 1.12421    | 1.40878    | 0            | 1         | 1         |
| Ust_j2            | 3.04035    | 3.32793    | 0            | 1         | 1         |
| 9130014G24Rik_j2  | 0.213593   | 0.235671   | 0.141907     | 0.84153   | 0.949932  |
| 9130014G24Rik_j15 | 0          | 0.0687251  | 1.79769e+308 | 0.0426727 | 1         |
| Utrn_j9           | 18.7413    | 18.1341    | 0            | 1         | 1         |
| Utrn_j10          | 2.27028    | 2.01665    | 0            | 1         | 1         |
| Phactr2_j4        | 5.54753    | 9.8116     | 0            | 1         | 1         |
| Phactr2_j3        | 0.329918   | 0.00030543 | 0            | 1         | 1         |
| Phactr2_j2        | 1.44504    | 3.62238    | 0            | 1         | 1         |
| XLOC_002652       | 0          | 0.103975   | 1.79769e+308 | 0.057623  | 1         |
| XLOC_002655       | 0.00108025 | 0.0889478  | 6.36353      | 0.414758  | 1         |
| 3110003A17Rik_j2  | 4.32158    | 6.2081     | 0.522593     | 0.0543024 | 0.271813  |
| Tnfaip3_j2        | 0.205006   | 0.261588   | 0.351626     | 0.463974  | 0.764451  |
| Pde7b_j1          | 0.0298901  | 0.0939435  | 0            | 1         | 1         |
| Rps12_j10         | 0.0241424  | 0.268651   | 3.47609      | 0.112494  | 0.417337  |
| Akap7_j3          | 1.49213    | 1.05239    | -0.503701    | 0.0740344 | 0.327996  |
| L3mbtl3_j2        | 0          | 0.152114   | 0            | 1         | 1         |
| Lama2_j4          | 1.60798    | 1.45876    | -0.140509    | 0.740683  | 0.909129  |
| Lama2_j11         | 0.1822     | 0.236224   | 0.374628     | 0.499428  | 0.784604  |
| Lama2_j15         | 0.0592913  | 0.138226   | 1.22113      | 0.0290231 | 1         |
| Nkain2_j2         | 0          | 0.124903   | 1.79769e+308 | 0.157265  | 1         |
| Rwdd1_j1          | 0.870186   | 0.592152   | 0            | 1         | 1         |
| Dse_j2            | 1.8721     | 1.9689     | 0            | 1         | 1         |
| AK038624_j1       | 63.5959    | 78.1927    | 0            | 1         | 1         |

|                  |             |                        |            |           |           |
|------------------|-------------|------------------------|------------|-----------|-----------|
| Gm16365_j6       | 0.0887013   | 0.0916186              | 0          | 1         | 1         |
| AA474331_j5      | 0           | 0.11905 1.79769e+308   | 0.0111578  |           | 1         |
| Al317395_j3      | 0           | 0.134544 1.79769e+308  | 0.0182032  |           | 1         |
| Rpf2_j4          | 0           | 0.148457               | 0          | 1         | 1         |
| Rpf2_j5          | 0           | 0.0821423              | 0          | 1         | 1         |
| Ccdc162_j11      | 0.152021    | 0.451139               | 1.5693     | 0.0045677 | 0.0474527 |
| Cep5711_j2       | 0.0822117   | 0.0372935              | 0          | 1         | 1         |
| Armc2_j5         | 0.279806    | 0.303092               | 0.115331   | 0.882842  | 0.96274   |
| Sobp             | 0.670342    | 0.653562               | -0.0365728 | 0.88648   | 0.964026  |
| Aim1             | 0.115613    | 0.150018               | 0.375829   | 0.452613  | 1         |
| XLOC_002744      | 0.134869    | 0.202834               | 0.588745   | 0.478598  | 0.773238  |
| Lin28b_j1        | 0.110087    | 0.207314               | 0.91318    | 0.0636976 | 0.299317  |
| Lin28b_j2        | 0.0493172   | 0.092317               | 0.904504   | 0.219129  | 1         |
| Lin28b_j3        | 0.300748    | 0.439567               | 0.54753    | 0.102431  | 0.396457  |
| Grik2_j6         | 0           | 0.145241               | 0          | 1         | 1         |
| Grik2            | 0.0648193   | 0.447761               | 0          | 1         | 1         |
| B230314j19_j1    | 0.149012    | 0.145116               | -0.0382278 | 0.938573  | 0.981243  |
| Fam184a_j7       | 0.000592598 | 0.0583424              | 0          | 1         | 1         |
| Sept10_j3        | 1.26277     | 1.37642                | 0.124333   | 0.659986  | 0.87099   |
| Sept10_j2        | 1.67699     | 1.75197                | 0.0631058  | 0.74373   | 0.910328  |
| Ccdc109a_j3      | 1.3254      | 2.09277                | 0          | 1         | 1         |
| Anapc16_j1       | 14.0627     | 16.1041                | 0.195556   | 0.210261  | 0.554818  |
| Chst3_j1         | 1.09036     | 1.35264                | 0.310967   | 0.0895951 | 0.367183  |
| Slc29a3_j3       | 3.1984      | 3.52965                | 0          | 1         | 1         |
| X99384_j2        | 0.692294    | 1.03368                | 0          | 1         | 1         |
| Col13a1_j13      | 0.0191709   | 0.0698482              | 1.8653     | 0.210884  | 1         |
| Supv3l1_j1       | 1.42015     | 1.14864                | 0          | 1         | 1         |
| 2510003E04Rik_j1 | 0.17145     | 0.227046               | 0.405196   | 0.567459  | 0.824883  |
| Ddx21_j1         | 2.68085     | 1.03868                | 0          | 1         | 1         |
| Ddx50_j5         | 0           | 0.115797               | 0          | 1         | 1         |
| Ccar1_j2         | 0.622358    | 0.778878               | 0          | 1         | 1         |
| Ccar1_j4         | 1.45179     | 3.76537                | 0          | 1         | 1         |
| Mypn_j4          | 0           | 0.0478307 1.79769e+308 | 0.11598    |           | 1         |
| Sirt1            | 0           | 0.184055 1.79769e+308  | 0.0032752  | 0.0369614 |           |
| Lrrtm3_j1        | 0.315169    | 0.271761               | -0.213787  | 0.624685  | 0.853434  |
| Nrbf2_j2         | 0.568173    | 0.565978               | 0          | 1         | 1         |
| Phyhipl_j4       | 0.229625    | 0.0718189              | 0          | 1         | 1         |
| Bicc1_j1         | 0.0220666   | 0.129636               | 0          | 1         | 1         |
| Bicc1_j2         | 0.198485    | 0.361667               | 0          | 1         | 1         |
| Cisd1_j3         | 0           | 0.079982 1.79769e+308  | 0.135479   |           | 1         |
| Cabin1_j7        | 3.17509     | 2.83422                | 0          | 1         | 1         |
| Gstt4_j1         | 0.101627    | 0.432231               | 2.08852    | 0.0010729 | 0.0151185 |
| Dip2a_j2         | 3.53133     | 2.61498                | 0          | 1         | 1         |
| Dip2a_j1         | 2.11034     | 2.08229                | 0          | 1         | 1         |
| Pcnt_j3          | 0.196784    | 0.142364               | 0          | 1         | 1         |
| Col6a1_j1        | 1.61054     | 2.2951                 | 0.511011   | 0.0108504 | 0.0908465 |
| Pcbp3_j14        | 6.63179     | 5.91729                | 0          | 1         | 1         |

|               |           |           |              |           |           |
|---------------|-----------|-----------|--------------|-----------|-----------|
| Pcbp3_j15     | 7.56113   | 11.8615   | 0            | 1         | 1         |
| Adarb1_j1     | 5.24576   | 7.38601   | 0            | 1         | 1         |
| Lrrc3_j2      | 0.724607  | 2.06614   | 0            | 1         | 1         |
| Trpm2_j5      | 3.48287   | 2.58495   | -0.430138    | 0.0248157 | 0.163389  |
| Trpm2_j6      | 0.276272  | 1.10739   | 2.003        | 6.90E-12  | 8.74E-10  |
| D10Jhu81e_j2  | 25.8689   | 23.9323   | -0.112262    | 0.402266  | 0.725446  |
| Rrp1_j6       | 0.286722  | 20.7317   | 0            | 1         | 1         |
| Rrp1_j7       | 35.1119   | 28.0655   | 0            | 1         | 1         |
| Syde1_j1      | 1.60566   | 1.41939   | 0            | 1         | 1         |
| Ppap2c        | 0         | 1.33009   | 0            | 1         | 1         |
| Mier2_j5      | 0.792197  | 1.00017   | 0            | 1         | 1         |
| Mier2_j6      | 0.937585  | 1.04345   | 0            | 1         | 1         |
| Shc2_j4       | 0.563458  | 0.579773  | 0            | 1         | 1         |
| Shc2_j3       | 0.0633952 | 0.390591  | 0            | 1         | 1         |
| Polrmt_j2     | 0.408118  | 1.03054   | 1.33634      | 3.64E-05  | 0.0009112 |
| Polrmt_j1     | 0.0276847 | 0.231298  | 3.06259      | 0.0017362 | 0.0223162 |
| Rnf126_j1     | 10.8401   | 14.3219   | 0            | 1         | 1         |
| Sbno2_j3      | 0         | 1.02578   | 0            | 1         | 1         |
| Sbno2_j4      | 3.82932   | 8.48618   | 0            | 1         | 1         |
| Dos_j3        | 0.242524  | 0.266662  | 0            | 1         | 1         |
| Adamts15_j6   | 0.315481  | 0.535993  | 0.764662     | 0.0562392 | 0.277482  |
| Adamts15_j5   | 0.590278  | 0.946912  | 0.681836     | 0.0171615 | 0.126598  |
| Tcf3_j3       | 0.776447  | 1.93543   | 0            | 1         | 1         |
| Atp8b3_j5     | 0         | 0.157481  | 1.79769e+308 | 0.0091351 | 0.0801339 |
| Atp8b3_j11    | 0.0877722 | 0.0515274 | -0.768423    | 0.678223  | 1         |
| Jsrp1_j3      | 0.0779532 | 0.0855138 | 0.133549     | 0.92211   | 1         |
| Lingo3_j1     | 0         | 0.0611884 | 1.79769e+308 | 0.0521636 | 1         |
| Lmnb2_j3      | 1.91676   | 1.96595   | 0.0365622    | 0.847653  | 0.951788  |
| Gng7_j1       | 0         | 0.345322  | 1.79769e+308 | 4.92E-05  | 0.0011786 |
| Gipc3_j2      | 0.128403  | 0.110394  | -0.218028    | 0.778618  | 1         |
| Hmg20b        | 2.48544   | 1.04079   | 0            | 1         | 1         |
| Nfic_j1       | 9.4995    | 1.38568   | 0            | 1         | 1         |
| Ncln_j4       | 1.4901    | 2.56631   | 0            | 1         | 1         |
| Gna15         | 0.0692782 | 0.282162  | 2.02605      | 0.0033941 | 0.0380125 |
| Tle6_j4       | 0.147713  | 0.065243  | -1.1789      | 0.388946  | 0.71624   |
| B230315N10Rik | 8.15044   | 7.69592   | -0.0827842   | 0.531645  | 0.803676  |
| Nuak1_j5      | 5.59821   | 6.49009   | 0            | 1         | 1         |
| Nuak1_j6      | 0         | 0.155973  | 0            | 1         | 1         |
| Cry1_j2       | 4.94E-05  | 0.605833  | 0            | 1         | 1         |
| Prdm4_j2      | 8.49505   | 9.84722   | 0            | 1         | 1         |
| 4930547N16Rik | 0.164114  | 0.198755  | 0.276292     | 0.578995  | 0.830622  |
| Ano4_j8       | 2.7513    | 1.36259   | 0            | 1         | 1         |
| Gas2l3_j3     | 0         | 0.428336  | 0            | 1         | 1         |
| Slc17a8_j3    | 0.387549  | 0.368304  | -0.0734803   | 0.888857  | 0.964743  |
| Actr6_j2      | 0.409726  | 0.202607  | -1.01597     | 0.192088  | 0.534262  |
| Tmpo_j1       | 0         | 0.460469  | 0            | 1         | 1         |
| Tmpo_j2       | 0.975613  | 0.678968  | 0            | 1         | 1         |

|                  |             |           |              |           |           |
|------------------|-------------|-----------|--------------|-----------|-----------|
| Rmst_j5          | 0.051493    | 0.1564    | 1.6028       | 0.107581  | 1         |
| Nedd1_j1         | 0           | 0.0819102 | 1.79769e+308 | 0.0162177 | 1         |
| 4930485B16Rik_j1 | 0.0444192   | 0.100293  | 1.17497      | 0.346117  | 1         |
| Snrpf            | 3.25992     | 3.52938   | 0.11458      | 0.568535  | 0.825633  |
| Vezt_j4          | 4.19288     | 3.98746   | 0            | 1         | 1         |
| Plxnc1_j1        | 1.93232     | 1.38705   | 0            | 1         | 1         |
| Mrpl42_j1        | 7.97565     | 5.97763   | -0.416028    | 0.11425   | 0.420617  |
| Mrpl42           | 28.1293     | 27.7856   | -0.0177372   | 0.895264  | 0.966918  |
| Nudt4_j1         | 38.8396     | 39.2383   | 0            | 1         | 1         |
| Gm10754_j5       | 0.143063    | 0.156063  | 0.125486     | 0.83583   | 0.947255  |
| Tmtc3_j7         | 0           | 0.288869  | 0            | 1         | 1         |
| Lrriq1_j4        | 0           | 0.278827  | 1.79769e+308 | 0.001543  | 0.0202104 |
| Lrriq1_j5        | 0           | 0.053898  | 1.79769e+308 | 0.0148255 | 1         |
| Lrriq1_j10       | 0.0193597   | 0.0759758 | 1.97248      | 0.088602  | 1         |
| Lrriq1_j13       | 0.0696174   | 0.0959972 | 0.463544     | 0.738481  | 1         |
| Tmtc2_j2         | 0           | 0.0948582 | 1.79769e+308 | 0.0373644 | 1         |
| XLOC_002980      | 0.0721425   | 0.289854  | 2.00641      | 0.157717  | 0.491865  |
| Ptprq_j2         | 0.16971     | 0.153017  | -0.149384    | 0.813278  | 0.939015  |
| Ptprq_j3         | 0.000975578 | 0.0818702 | 6.39094      | 0.397151  | 1         |
| Ptprq_j5         | 0.094518    | 0.110316  | 0.222978     | 0.792786  | 1         |
| Syt1_j8          | 0           | 0.871327  | 0            | 1         | 1         |
| Syt1_j9          | 0.370735    | 0.62071   | 0            | 1         | 1         |
| Nav3_j1          | 0           | 0.117785  | 1.79769e+308 | 0.0001531 | 1         |
| Nav3_j2          | 0           | 0.102695  | 1.79769e+308 | 9.89E-05  | 1         |
| Zdhhc17_j3       | 0.797396    | 0.886944  | 0            | 1         | 1         |
| Glipr1_j3        | 1.34983     | 1.61842   | 0.261808     | 0.474542  | 0.770688  |
| Tph2_j1          | 0.165203    | 0.196934  | 0.253465     | 0.774339  | 0.92355   |
| Tph2_j2          | 0.0775116   | 0.0616978 | -0.329194    | 0.802232  | 1         |
| Tmem19_j2        | 1.99783     | 1.14693   | 0            | 1         | 1         |
| Lgr5_j2          | 0.646691    | 0.5458    | 0            | 1         | 1         |
| XLOC_002999      | 0.0745882   | 0.0720867 | 0            | 1         | 1         |
| Kcnmb4_j1        | 9.36716     | 13.6882   | 0.547249     | 0.0085082 | 0.0759335 |
| Cnot2_j6         | 0.971747    | 1.07815   | 0            | 1         | 1         |
| Gm239_j2         | 4.65657     | 3.30655   | 0            | 1         | 1         |
| Mdm2_j2          | 0.596694    | 0.72341   | 0            | 1         | 1         |
| Slc35e3_j2       | 0.000345004 | 0.913929  | 11.3713      | 0.617539  | 0.849506  |
| Dyrk2_j1         | 0.876082    | 0.466097  | -0.910434    | 0.002134  | 0.0262863 |
| Cand1_j1         | 10.9405     | 9.96313   | 0            | 1         | 1         |
| Msr3_j2          | 0.55272     | 0.650104  | 0.234121     | 0.485401  | 0.777011  |
| Tbc1d30_j2       | 3.43642     | 3.75066   | 0            | 1         | 1         |
| Mon2_j1          | 0.858204    | 1.22197   | 0.509815     | 0.0139383 | 0.109108  |
| Slc16a7_j2       | 0           | 0.200004  | 0            | 1         | 1         |
| Slc16a7_j8       | 0.0057785   | 0.0967751 | 0            | 1         | 1         |
| Arhgef25_j8      | 0.164946    | 0.281097  | 0            | 1         | 1         |
| Arhgef25_j9      | 0.259614    | 0.0850633 | 0            | 1         | 1         |
| Arhgef25_j10     | 0.209896    | 0.638149  | 0            | 1         | 1         |
| Dtx3_j8          | 20.1147     | 20.4355   | 0            | 1         | 1         |

|                  |           |           |               |           |           |
|------------------|-----------|-----------|---------------|-----------|-----------|
| Kif5a_j9         | 1.9751    | 2.42232   | 0             | 1         | 1         |
| Kif5a_j10        | 5.63191   | 5.10178   | 0             | 1         | 1         |
| Kif5a_j11        | 2.75401   | 3.53243   | 0             | 1         | 1         |
| Gli1_j5          | 0.0811565 | 0.200044  | 1.30154       | 0.0490918 | 0.255385  |
| Shmt2_j1         | 3.07083   | 3.84616   | 0.324789      | 0.099662  | 0.390857  |
| Lrp1_j3          | 5.36615   | 6.24552   | 0             | 1         | 1         |
| Myl6_j2          | 75.184    | 92.2378   | 0             | 1         | 1         |
| Esyt1_j2         | 0         | 0.0736817 | 0             | 1         | 1         |
| Rps26_j6         | 20.4177   | 22.7294   | 0.154743      | 0.378073  | 0.709693  |
| Rps26_j2         | 0.5291    | 1.67627   | 1.66365       | 0.0216812 | 0.148971  |
| Rab5b_j10        | 0.116313  | 0.419565  | 1.85089       | 0.0021456 | 0.0263622 |
| Rab5b_j11        | 0         | 0.166603  | 1.79769e+308  | 0.0035512 | 0.039391  |
| Cdk2_j2          | 0         | 0.120541  | 1.79769e+308  | 0.0272169 | 1         |
| Dgka_j1          | 0.683625  | 0.509484  | 0             | 1         | 1         |
| Fbxo5_j2         | 0         | 0.0773365 | 1.79769e+308  | 0.110314  | 1         |
| Syne1_j2         | 0.107088  | 0.206591  | 0.947988      | 1         | 1         |
| Syne1_j8         | 0         | 0.224908  | 0             | 1         | 1         |
| Syne1_j9         | 0.10119   | 0         | 0             | 1         | 1         |
| XLOC_002183      | 0         | 0.0936295 | 0             | 1         | 1         |
| XLOC_002183      | 0.0884235 | 0.0793576 | -0.156062     | 1         | 1         |
| XLOC_002183      | 0         | 0.076442  | 0             | 1         | 1         |
| XLOC_002183      | 0.272566  | 0.155482  | -0.809861     | 1         | 1         |
| Syne1_j8         | 0.241407  | 0.171383  | 0             | 1         | 1         |
| Rmnd1_j7         | 0.0311388 | 0.145022  | 2.21949       | 0.0005002 | 1         |
| Zbtb2_j1         | 1.25913   | 1.17172   | -0.103799     | 0.666738  | 0.873843  |
| Zbtb2            | 0.233916  | 0.492968  | 1.0755        | 0.0176618 | 0.129159  |
| Lats1_j1         | 3.14223   | 3.56157   | 0.180726      | 0.240639  | 0.588061  |
| XLOC_002193      | 0.0603851 | 0.087588  | 0.53654       | 0.59725   | 1         |
| Fbxo30_j2        | 0.31057   | 0.442867  | 0.511954      | 0.175281  | 0.513636  |
| Fuca2            | 0.641121  | 0         | -1.79769e+308 | 6.00E-08  | 3.48E-06  |
| AK006045_j1      | 0         | 0.155231  | 1.79769e+308  | 0.0358357 | 1         |
| Cited2           | 0.899656  | 0.246603  | -1.86718      | 0.0046946 | 0.0483954 |
| Reps1            | 0         | 0.533787  | 0             | 1         | 1         |
| XLOC_002212      | 0.108979  | 0.0754155 | -0.531114     | 0.627144  | 1         |
| Bclaf1_j2        | 3.43378   | 4.10892   | 0             | 1         | 1         |
| Fam54a_j4        | 0.135316  | 0.194317  | 0.522078      | 0.688027  | 0.884086  |
| Hbs1l_j2         | 0.182257  | 0.168523  | -0.113032     | 0.927378  | 0.977629  |
| Sgk1_j2          | 0.159619  | 0.971148  | 2.60506       | 3.38E-06  | 0.0001202 |
| Raet1a_j2        | 0         | 0.169241  | 1.79769e+308  | 0.0465351 | 0.247371  |
| Moxd1_j1         | 8.5935    | 8.36788   | -0.0383846    | 0.745323  | 0.91128   |
| Med23_j4         | 2.37043   | 2.99385   | 0.336851      | 0.0833449 | 0.351994  |
| Ptprk_j14        | 0.385505  | 0.733575  | 0.928195      | 0.0016113 | 0.0209603 |
| Ptprk_j15        | 0.424207  | 0.471203  | 0.15158       | 0.723222  | 0.90144   |
| 9330159F19Rik_j5 | 14.0017   | 13.615    | 0             | 1         | 1         |
| Fyn_j5           | 1.61071   | 2.34736   | 0             | 1         | 1         |
| Mical1_j3        | 0.555487  | 0.687887  | 0.308419      | 0.3506    | 0.687976  |
| Mical1_j5        | 3.22115   | 3.84587   | 0.255733      | 0.0631686 | 0.297981  |

|                  |           |           |              |           |           |
|------------------|-----------|-----------|--------------|-----------|-----------|
| Mical1_j8        | 5.50879   | 6.65953   | 0.273686     | 0.0651355 | 0.303964  |
| Cd164_j5         | 1.77719   | 1.5288    | -0.217201    | 0.730792  | 0.904795  |
| Ostm1_j1         | 0.217789  | 3.49268   | 0            | 1         | 1         |
| Sec63_j4         | 0.885402  | 1.33377   | 0.591108     | 0.0170735 | 0.126115  |
| Sec63_j5         | 11.4623   | 11.8501   | 0.0480006    | 0.727939  | 0.903627  |
| Scml4            | 0.710213  | 1.01659   | 0.51741      | 0.0459335 | 0.245257  |
| XLOC_002275      | 0         | 0.066689  | 1.79769e+308 | 0.0740661 | 1         |
| Atg5_j3          | 2.07649   | 2.00946   | -0.0473391   | 0.896423  | 0.967019  |
| Popdc3           | 3.84551   | 3.93915   | 0            | 1         | 1         |
| Hace1_j2         | 4.18306   | 4.07916   | -0.0362853   | 0.899164  | 0.967697  |
| Lilrb4_j1        | 0.195721  | 0.114671  | -0.771299    | 0.562119  | 0.821999  |
| Lilrb4_j4        | 0.0821505 | 0.276771  | 1.75235      | 0.007346  | 0.0682742 |
| Lilrb4_j3        | 0.215548  | 0.288466  | 0.420395     | 0.24807   | 0.595431  |
| Lilrb4           | 0.0789273 | 0.223866  | 1.50404      | 0.148544  | 0.477406  |
| Msl3l2_j1        | 3.26828   | 3.83901   | 0.232202     | 0.173225  | 0.510867  |
| Gcc2_j1          | 0.197008  | 0.378252  | 0.941088     | 0.0087824 | 0.0777821 |
| Ranbp2_j4        | 0.728543  | 0.729731  | 0            | 1         | 1         |
| Ccdc138_j3       | 0.467673  | 0.536174  | 0.1972       | 0.632904  | 0.857331  |
| Ccdc138          | 1.0586    | 0.66427   | -0.672313    | 0.166173  | 0.502787  |
| Sh3rf3_j4        | 0         | 0.0819769 | 1.79769e+308 | 0.0011328 | 1         |
| Lrrc20_j1        | 0.291761  | 0.477382  | 0            | 1         | 1         |
| Lrrc20_j2        | 0         | 0.374826  | 0            | 1         | 1         |
| Aifm2_j1         | 1.46639   | 1.6317    | 0.154106     | 0.506131  | 0.788656  |
| Dna2_j1          | 0         | 0.126879  | 1.79769e+308 | 0.0019844 | 1         |
| Herc4_j1         | 0.0801465 | 0.390515  | 0            | 1         | 1         |
| Ctnna3_j2        | 0.0946407 | 0.203823  | 1.10678      | 0.14229   | 0.468933  |
| Ank3_j8          | 0.0979238 | 0.25623   | 1.38771      | 5.00E-05  | 0.0011922 |
| Ank3_j10         | 13.9801   | 17.4342   | 0.318547     | 0.0072592 | 0.0677203 |
| Ccdc6_j2         | 7.75905   | 7.10813   | 0            | 1         | 1         |
| Slc16a9_j1       | 0.010452  | 0.460777  | 0            | 1         | 1         |
| Slc16a9          | 1.76376   | 1.336     | 0            | 1         | 1         |
| Rab36_j3         | 2.33811   | 0.673531  | 0            | 1         | 1         |
| Mcm3ap_j1        | 4.32472   | 4.93355   | 0.190019     | 0.150767  | 0.481532  |
| Lss_j1           | 0.687743  | 0.742441  | 0            | 1         | 1         |
| Sumo3_j1         | 46.2941   | 47.2777   | 0.0303343    | 0.758748  | 0.917041  |
| Dnmt3l_j1        | 0.125989  | 0.418799  | 1.73297      | 0.0051736 | 0.0520336 |
| Icosl_j1         | 0         | 0.0945498 | 1.79769e+308 | 0.0317426 | 1         |
| Fstl3_j2         | 0         | 0.119678  | 1.79769e+308 | 0.0391585 | 1         |
| 9130017N09Rik_j1 | 0         | 0.0887789 | 1.79769e+308 | 0.0356843 | 1         |
| Ptbp1_j5         | 1.25276   | 1.44067   | 0            | 1         | 1         |
| Ptbp1_j4         | 0.747807  | 0.673019  | 0            | 1         | 1         |
| Ptbp1_j6         | 0.537374  | 1.08523   | 0            | 1         | 1         |
| Arid3a_j2        | 0.0516818 | 0.108633  | 1.07174      | 0.15105   | 1         |
| Wdr18_j1         | 0.176951  | 0.264175  | 0.578147     | 0.254138  | 0.602447  |
| Abca7_j9         | 26.5835   | 28.7305   | 0            | 1         | 1         |
| Hmha1_j1         | 0.0556177 | 0.0849495 | 0.611061     | 0.416886  | 1         |
| Cirbp_j1         | 0         | 0.0603567 | 1.79769e+308 | 0.0873965 | 1         |

|                  |           |           |              |           |           |
|------------------|-----------|-----------|--------------|-----------|-----------|
| Cirbp_j4         | 0         | 0.0948084 | 1.79769e+308 | 0.0397819 | 1         |
| Efna2_j1         | 2.16E-05  | 0.64377   | 14.8618      | 0.978685  | 0.993756  |
| Dazap1_j3        | 3.63948   | 2.48309   | -0.551597    | 0.0459346 | 0.245257  |
| Rps15_j6         | 129.918   | 160.666   | 0.306458     | 0.0047031 | 0.0484619 |
| Apc2_j1          | 8.11495   | 6.20468   | -0.387226    | 0.0001188 | 0.002482  |
| Reep6_j2         | 0         | 0.150893  | 1.79769e+308 | 0.0175697 | 1         |
| Csnk1g2          | 3.14904   | 3.98408   | 0            | 1         | 1         |
| Izumo4_j4        | 0.113253  | 0.783864  | 2.79105      | 0.0017138 | 0.0220984 |
| Dot1l_j3         | 0.517486  | 0.841535  | 0.701505     | 0.00497   | 0.0504971 |
| Dot1l_j4         | 0.263906  | 0.282442  | 0.0979331    | 0.791036  | 0.930334  |
| Dot1l_j10        | 0.136964  | 0.268348  | 0.970307     | 0.167025  | 0.503276  |
| Sppl2b_j1        | 0.0949425 | 0.131398  | 0.468822     | 0.501941  | 1         |
| Sppl2b_j3        | 5.91941   | 4.92463   | -0.265438    | 0.119227  | 0.429562  |
| Tmprss9_j3       | 0.32871   | 0.116212  | -1.50005     | 0.0096534 | 0.0834928 |
| Eef2             | 228.895   | 256.013   | 0.161529     | 0.0741467 | 0.328254  |
| Apba3_j1         | 1.94591   | 1.6755    | 0            | 1         | 1         |
| Tbxa2r           | 0.0679507 | 0.143763  | 1.08113      | 0.300766  | 1         |
| Dohh_j1          | 0.129954  | 0.299559  | 1.20483      | 0.0898571 | 0.367861  |
| Ankrd24_j13      | 0.125462  | 0.38322   | 0            | 1         | 1         |
| Ankrd24_j15      | 1.30836   | 1.10095   | 0            | 1         | 1         |
| BC062115_j3      | 0.198854  | 0.318333  | 0.678831     | 0.236317  | 0.583536  |
| XLOC_002451      | 0.121992  | 0.179862  | 0.560106     | 0.476505  | 0.772159  |
| Mif1_j5          | 0.110533  | 0.158822  | 0.522935     | 0.41611   | 0.733677  |
| Tdg_j3           | 0.202742  | 0.365514  | 0.85028      | 0.019448  | 0.138267  |
| Txnrd1_j5        | 0         | 0.461338  | 0            | 1         | 1         |
| Txnrd1_j6        | 35.8462   | 46.7395   | 0            | 1         | 1         |
| A230046K03Rik_j3 | 0         | 0.247231  | 0            | 1         | 1         |
| XLOC_002466      | 0.026528  | 0.115131  | 2.11769      | 0.228125  | 1         |
| XLOC_002469      | 0         | 0.0544215 | 1.79769e+308 | 0.115571  | 1         |
| Timp3_j1         | 0         | 0.0723834 | 0            | 1         | 1         |
| BC030307_j10     | 0         | 0.0474857 | 1.79769e+308 | 0.100874  | 1         |
| Nt5dc3_j3        | 2.66208   | 3.73603   | 0            | 1         | 1         |
| Igf1_j5          | 0         | 0.0717691 | 1.79769e+308 | 0.0050067 | 1         |
| Pmch_j1          | 0.0789927 | 0.109289  | 0.468358     | 0.706961  | 1         |
| Ccdc53_j2        | 7.11239   | 7.14726   | 0.00705732   | 0.979583  | 0.994006  |
| Sycp3_j1         | 0.252275  | 0.0385134 | -2.71157     | 0.104985  | 0.402248  |
| Cdk17_j1         | 0.452458  | 0.38894   | 0            | 1         | 1         |
| Tmcc3            | 0.291138  | 0.524548  | 0            | 1         | 1         |
| Ube2n_j3         | 0.301568  | 0.528574  | 0.80962      | 0.0357211 | 0.20846   |
| Epyc_j1          | 0.624313  | 0.434809  | -0.521886    | 0.147215  | 0.475769  |
| XLOC_002519      | 0.0361912 | 0.0495345 | 0.452793     | 0.781897  | 1         |
| Wdr51b_j1        | 0.368143  | 0.456671  | 0.310891     | 0.480006  | 0.77397   |
| Ppfia2_j5        | 1.70511   | 1.79926   | 0.0775406    | 0.676112  | 0.878079  |
| Ppfia2_j13       | 1.63222   | 2.32041   | 0.507548     | 0.0852428 | 0.356401  |
| XLOC_002533      | 0.0719713 | 0.189559  | 0            | 1         | 1         |
| Zfc3h1_j5        | 3.95155   | 4.43972   | 0            | 1         | 1         |
| Tspan8_j1        | 14.223    | 16.5866   | 0            | 1         | 1         |



|                   |            |             |              |           |           |
|-------------------|------------|-------------|--------------|-----------|-----------|
| Ptprr_j4          | 0.272466   | 0.113896    | 0            | 1         | 1         |
| AK016788_j5       | 0          | 0.0861832   | 0            | 1         | 1         |
| Mdm1_j5           | 0          | 0.088172    | 1.79769e+308 | 0.0237435 | 1         |
| Mdm1              | 0.239866   | 0.281038    | 0.228538     | 0.646762  | 0.863884  |
| Grip1             | 0.494592   | 0.000127991 | 0            | 1         | 1         |
| Llph_j4           | 0.14504    | 0.101904    | -0.509246    | 0.406698  | 0.727764  |
| Ppm1h_j3          | 6.74454    | 12.1904     | 0            | 1         | 1         |
| Lrig3_j3          | 0          | 0.0590374   | 1.79769e+308 | 0.0903783 | 1         |
| Ctdsp2_j2         | 0          | 0.111517    | 1.79769e+308 | 0.0073675 | 1         |
| Avil_j1           | 21.8376    | 75.241      | 0            | 1         | 1         |
| Avil_j8           | 0.244718   | 0.496277    | 0            | 1         | 1         |
| B4galnt1_j2       | 3.43594    | 3.21442     | -0.0961477   | 0.617813  | 0.849619  |
| B4galnt1_j4       | 3.66496    | 4.46844     | 0.285976     | 0.111379  | 0.415457  |
| R3hdm2_j8         | 4.91611    | 3.93667     | 0            | 1         | 1         |
| XLOC_002588       | 0.105547   | 0.0925382   | -0.189764    | 0.834517  | 1         |
| Stac3_j5          | 0.0247691  | 0.10577     | 2.09432      | 0.398634  | 1         |
| Stac3_j12         | 0.104179   | 0.144934    | 0.476336     | 0.736153  | 1         |
| Myo1a_j5          | 0.18157    | 0.848366    | 0            | 1         | 1         |
| XLOC_002593       | 0.0913573  | 0.136979    | 0.584357     | 0.428785  | 1         |
| XLOC_002597       | 0.0444429  | 0.0604428   | 0.44362      | 0.741914  | 1         |
| Ptges3_j3         | 100.588    | 105.228     | 0.065058     | 0.465197  | 0.765114  |
| Timeless_j5       | 0.0740462  | 0.334524    | 2.17561      | 0.0220211 | 0.150648  |
| Stat2_j2          | 0.341014   | 0.425054    | 0            | 1         | 1         |
| Stat2_j3          | 1.7219     | 3.5197      | 0            | 1         | 1         |
| Pan2_j8           | 0.110011   | 0.274919    | 1.32136      | 0.0124149 | 0.100677  |
| Cnpy2_j1          | 0          | 1.05305     | 1.79769e+308 | 0.00222   | 0.0270685 |
| Ankrd52_j3        | 0          | 0.0910446   | 0            | 1         | 1         |
| Rnf41_j1          | 0.539679   | 0.673008    | 0            | 1         | 1         |
| Rnf41_j4          | 18.0179    | 21.7178     | 0            | 1         | 1         |
| XLOC_002609       | 0.00250946 | 0.0575323   | 0            | 1         | 1         |
| Pym_j1            | 0.0380825  | 0.181093    | 0            | 1         | 1         |
| 1110005A23Rik_j2  | 0.45274    | 1.44301     | 0            | 1         | 1         |
| Dnajc14_j1        | 9.18413    | 9.79962     | 0            | 1         | 1         |
| Cd63_j5           | 14.0267    | 23.8239     | 0.764232     | 2.41E-05  | 0.0006454 |
| Cd63_j9           | 0.289148   | 1.09805     | 1.92506      | 0.0078423 | 0.0715092 |
| Akap12_j7         | 49.3266    | 53.487      | 0            | 1         | 1         |
| Mthfd1l_j1        | 1.85208    | 2.57526     | 0            | 1         | 1         |
| Plekhg1_j2        | 0.451461   | 0.185087    | 0            | 1         | 1         |
| Ppp1r14c_j2       | 0          | 1.36781     | 0            | 1         | 1         |
| Ppp1r14c_j3       | 4.36776    | 4.45231     | 0            | 1         | 1         |
| Pcmt1_j2          | 0.43341    | 0.324037    | 0            | 1         | 1         |
| Ust_j7            | 7.23536    | 7.61242     | 0            | 1         | 1         |
| Sash1_j5          | 0          | 0.255331    | 0            | 1         | 1         |
| Stxbp5_j2         | 0.716545   | 0.483025    | 0            | 1         | 1         |
| 9130014G24Rik_j12 | 0.0684227  | 0.0847818   | 0.309279     | 0.713054  | 1         |
| Utrn_j11          | 0.269956   | 0.522373    | 0            | 1         | 1         |
| Utrn_j12          | 7.84635    | 8.97574     | 0            | 1         | 1         |

|                  |             |           |              |           |           |
|------------------|-------------|-----------|--------------|-----------|-----------|
| Ltv1_j2          | 1.72074     | 3.10956   | 0            | 1         | 1         |
| Phactr2_j1       | 1.43079     | 3.26505   | 0            | 1         | 1         |
| Aig1_j2          | 6.79322     | 6.20334   | -0.13105     | 0.524153  | 0.799783  |
| Gpr126_j4        | 0.549154    | 0.4913    | 0            | 1         | 1         |
| Vta1_j1          | 11.2601     | 11.5568   | 0.0375218    | 0.850959  | 0.952632  |
| 3110003A17Rik_j3 | 0.508568    | 0.164742  | -1.62623     | 0.247348  | 0.594884  |
| Ccdc28a_j1       | 10.3478     | 10.6512   | 0.041697     | 0.854788  | 0.954015  |
| Hebp2_j1         | 1.6704      | 1.83864   | 0.13844      | 0.484505  | 0.776397  |
| Tnfaip3_j1       | 0.0270865   | 0.109141  | 2.01055      | 0.0429362 | 1         |
| AK053193_j1      | 0.0370074   | 0.299726  | 3.01776      | 0.199521  | 0.542548  |
| Rps12_j6         | 0.000190514 | 0.21428   | 10.1354      | 0.789444  | 0.92976   |
| Enpp3_j3         | 0.110399    | 0.0411085 | -1.42522     | 0.418118  | 1         |
| Akap7_j1         | 0.417105    | 0.204494  | -1.02835     | 0.21335   | 0.55853   |
| L3mbtl3_j1       | 0.40229     | 0.591135  | 0            | 1         | 1         |
| Lama2_j1         | 0.85056     | 1.40873   | 0.727908     | 0.0032585 | 0.0368315 |
| Lama2_j2         | 0.726107    | 0.607877  | -0.256402    | 0.391029  | 0.717708  |
| Lama2_j3         | 0.0824794   | 0.152743  | 0.889005     | 0.0507792 | 1         |
| 2310057J18Rik    | 0.0861486   | 0.201148  | 1.22336      | 0.147387  | 0.476036  |
| Trmt11_j1        | 0.740774    | 1.22878   | 0.730124     | 0.196213  | 0.538985  |
| Ncoa7_j3         | 1.25273     | 1.23309   | 0            | 1         | 1         |
| Clvs2_j2         | 1.21802     | 1.63476   | 0.424541     | 0.24409   | 0.591518  |
| Wisp3_j1         | 1.25E-05    | 0.102565  | 13.0051      | 0.965389  | 1         |
| Gm16364_j1       | 0           | 0.761761  | 0            | 1         | 1         |
| Gm16365_j3       | 0.118607    | 0.415868  | 0            | 1         | 1         |
| Slc16a10_j4      | 0.176218    | 0.168953  | -0.060742    | 0.953809  | 0.98656   |
| Ccdc162_j5       | 0.0871199   | 0.320495  | 1.87923      | 0.0236225 | 0.157919  |
| Ccdc162_j13      | 0           | 0.0497634 | 1.79769e+308 | 0.0884795 | 1         |
| XLOC_002728      | 0           | 0.155096  | 1.79769e+308 | 0.036684  | 1         |
| Cep57l1_j4       | 0.289258    | 0.829756  | 0            | 1         | 1         |
| Cep57l1_j5       | 0           | 0.0565515 | 0            | 1         | 1         |
| Cep57l1_j6       | 0.678496    | 0.463887  | 0            | 1         | 1         |
| Armc2            | 0.112118    | 0.161805  | 0.529235     | 0.358048  | 0.693676  |
| Foxo3_j2         | 0.0785835   | 0.894303  | 0            | 1         | 1         |
| Lace1_j5         | 0.503716    | 0.189115  | 0            | 1         | 1         |
| AK145144_j4      | 0.0362538   | 0.121929  | 1.74984      | 0.260533  | 1         |
| Sobp_j2          | 3.34317     | 3.30998   | -0.0143926   | 0.945865  | 0.983787  |
| Prdm1_j1         | 0.137976    | 0.211677  | 0.617448     | 0.207029  | 0.551484  |
| Prdm1            | 0.176905    | 0.32586   | 0.881275     | 0.0118875 | 0.0975199 |
| Lin28b_j5        | 1.68E-05    | 0.0663358 | 11.9499      | 0.94379   | 1         |
| Lin28b_j15       | 0.364626    | 0.253134  | -0.526518    | 0.0921182 | 0.373416  |
| Grik2_j3         | 0           | 0.100993  | 0            | 1         | 1         |
| Grik2_j4         | 1.23867     | 0.998219  | 0            | 1         | 1         |
| Mcm9_j5          | 0.0421118   | 0.108364  | 1.36359      | 0.0678072 | 1         |
| Fam184a_j6       | 0.560876    | 0.583653  | 0            | 1         | 1         |
| Fam184a_j5       | 0           | 0.170729  | 0            | 1         | 1         |
| Serinc1_j4       | 211.885     | 192.071   | 0            | 1         | 1         |
| Chst3_j4         | 0.111296    | 0.0973957 | -0.192475    | 0.762479  | 1         |

|                  |           |           |              |           |           |
|------------------|-----------|-----------|--------------|-----------|-----------|
| Unc5b_j1         | 1.8526    | 1.73097   | -0.0979748   | 0.58274   | 0.832835  |
| 2010107G23Rik_j2 | 1.25487   | 1.86779   | 0            | 1         | 1         |
| Hk1_j5           | 1.35573   | 0.645894  | 0            | 1         | 1         |
| Ddx50_j1         | 3.4768    | 2.83057   | 0            | 1         | 1         |
| Ccar1_j6         | 1.31006   | 0.93902   | 0            | 1         | 1         |
| Tet1_j4          | 0.0669894 | 0.092292  | 0.462274     | 0.703862  | 1         |
| XLOC_002796      | 0.0151585 | 0.138262  | 3.18921      | 0.118964  | 1         |
| 1110038D17Rik_j1 | 3.88257   | 3.94505   | 0            | 1         | 1         |
| Susd2_j1         | 1.75173   | 2.82538   | 0.689668     | 1.75E-05  | 0.0004969 |
| Susd2_j7         | 0.231586  | 0.220659  | -0.0697295   | 0.909106  | 0.971253  |
| Cabin1_j1        | 6.13525   | 7.22181   | 0            | 1         | 1         |
| Cabin1_j3        | 0.816198  | 2.46198   | 0            | 1         | 1         |
| Gstt2_j2         | 0.791025  | 1.30799   | 0.725559     | 0.0423059 | 0.232546  |
| Smarcb1_j1       | 22.0853   | 26.9228   | 0.285744     | 0.009409  | 0.0819322 |
| Pcnt_j4          | 0.0716958 | 0.341658  | 0            | 1         | 1         |
| Pcbp3_j6         | 15.8546   | 13.4758   | 0            | 1         | 1         |
| Pcbp3_j5         | 0.217443  | 0         | 0            | 1         | 1         |
| Pcbp3_j7         | 2.09034   | 1.67096   | 0            | 1         | 1         |
| Col18a1_j8       | 3.2623    | 4.42154   | 0.43866      | 0.0001328 | 0.00272   |
| Adarb1_j2        | 0.0389875 | 0.0851674 | 0            | 1         | 1         |
| Pfkl_j2          | 22.6938   | 21.3849   | -0.0857066   | 0.353091  | 0.689667  |
| Agpat3_j1        | 0         | 0.198571  | 1.79769e+308 | 4.28E-05  | 0.0010433 |
| Agpat3_j8        | 3.75187   | 2.82273   | -0.410518    | 0.008803  | 0.0779222 |
| Rrp1_j5          | 0         | 0.202233  | 0            | 1         | 1         |
| Ppap2c           | 1.22665   | 1.05958   | 0            | 1         | 1         |
| Shc2_j1          | 1.33804   | 0.382933  | 0            | 1         | 1         |
| Med16_j2         | 3.05384   | 4.3419    | 0            | 1         | 1         |
| Med16_j3         | 0.11821   | 0.114064  | 0            | 1         | 1         |
| Dos_j4           | 5.61495   | 5.02172   | 0            | 1         | 1         |
| Pcsk4_j6         | 0.139574  | 0.140904  | 0.0136806    | 0.990258  | 0.997044  |
| Adamts15_j1      | 0.0280521 | 0.0858597 | 1.61387      | 0.133353  | 1         |
| Uqcr11_j1        | 12.7831   | 12.7251   | -0.00656127  | 0.983471  | 0.995138  |
| Tcf3             | 2.05702   | 1.37505   | 0            | 1         | 1         |
| Tcf3_j4          | 0.321459  | 0.380242  | 0            | 1         | 1         |
| Tcf3             | 1.2615    | 3.20512   | 0            | 1         | 1         |
| Atp8b3_j6        | 0         | 0.0504822 | 1.79769e+308 | 0.161499  | 1         |
| Atp8b3_j7        | 0         | 0.0799123 | 1.79769e+308 | 0.0523122 | 1         |
| Rexo1_j1         | 1.27071   | 1.36349   | 0            | 1         | 1         |
| Klf16            | 7.24645   | 7.19999   | -0.00927987  | 0.945326  | 0.983703  |
| Btbd2_j1         | 14.1839   | 17.0765   | 0            | 1         | 1         |
| Mknk2_j4         | 5.66916   | 9.40246   | 0            | 1         | 1         |
| Ap3d1_j1         | 21.1319   | 24.571    | 0            | 1         | 1         |
| Ap3d1_j2         | 0.0688324 | 0.33156   | 0            | 1         | 1         |
| Slc39a3_j2       | 0.697755  | 0.390593  | 0            | 1         | 1         |
| Slc39a3          | 5.56132   | 5.00866   | 0            | 1         | 1         |
| Atcay_j2         | 8.4425    | 8.45372   | 0            | 1         | 1         |
| Mrpl54_j2        | 0         | 0.201978  | 0            | 1         | 1         |

|                  |             |           |              |           |           |
|------------------|-------------|-----------|--------------|-----------|-----------|
| Hmg20b           | 3.67217     | 4.45115   | 0            | 1         | 1         |
| Fzr1_j4          | 1.16754     | 1.57185   | 0.428984     | 0.0666416 | 0.308452  |
| Gna11_j1         | 8.33589     | 10.2436   | 0            | 1         | 1         |
| Tle6_j2          | 0.268705    | 0.243321  | -0.143164    | 0.81615   | 0.940221  |
| XLOC_002912      | 0.100007    | 0.128769  | 0.364679     | 0.787876  | 1         |
| XLOC_002912      | 0.0526007   | 0.129761  | 1.30271      | 0.133437  | 1         |
| Nfyb_j1          | 0.214407    | 0.856516  | 0            | 1         | 1         |
| Slc41a2_j7       | 0           | 0.209707  | 0            | 1         | 1         |
| Appl2_j1         | 2.50829     | 2.70588   | 0            | 1         | 1         |
| Appl2_j2         | 0.197613    | 0.430987  | 0            | 1         | 1         |
| Appl2_j4         | 2.31371     | 2.63625   | 0            | 1         | 1         |
| Nuak1_j3         | 0           | 0.212821  | 0            | 1         | 1         |
| Nuak1_j4         | 2.45073     | 1.46058   | 0            | 1         | 1         |
| Mterfd3_j1       | 0           | 0.173767  | 0            | 1         | 1         |
| Prdm4_j1         | 0.228143    | 0.974009  | 0            | 1         | 1         |
| Dram1_j1         | 0           | 0.164466  | 1.79769e+308 | 0.0053272 | 0.0532056 |
| Utp20_j5         | 2.21984     | 2.90775   | 0            | 1         | 1         |
| Ano4_j4          | 0.578591    | 0.875512  | 0            | 1         | 1         |
| Ano4_j5          | 0           | 0.284267  | 0            | 1         | 1         |
| Scyl2            | 3.28008     | 2.46234   | 0            | 1         | 1         |
| Apaf1_j1         | 1.15528     | 1.14989   | 0            | 1         | 1         |
| Tmpo_j3          | 0.734257    | 0.770296  | 0            | 1         | 1         |
| BC065048_j1      | 0           | 0.17161   | 1.79769e+308 | 0.0590612 | 0.28563   |
| Metap2_j2        | 0.0332257   | 0.117861  | 0            | 1         | 1         |
| Vezt_j6          | 0.426301    | 0.29045   | 0            | 1         | 1         |
| 4932415G12Rik_j3 | 0           | 0.0651372 | 1.79769e+308 | 0.00902   | 1         |
| Plxnc1_j6        | 10.8778     | 12.2209   | 0            | 1         | 1         |
| XLOC_002961      | 0.0490961   | 0.107912  | 1.13618      | 0.32514   | 1         |
| Socs2_j2         | 0.369851    | 0.553853  | 0            | 1         | 1         |
| Socs2            | 7.03987     | 9.19886   | 0            | 1         | 1         |
| Gm10754_j6       | 0.703781    | 0.511642  | -0.459992    | 0.217801  | 0.563904  |
| Tmtc3_j4         | 0.0885742   | 0.456195  | 0            | 1         | 1         |
| Nts_j3           | 2.67134     | 7.92798   | 1.56939      | 1.40E-09  | 1.14E-07  |
| Nts_j4           | 0.172811    | 0.453279  | 1.39121      | 0.0937663 | 0.377256  |
| XLOC_002980      | 0           | 0.191886  | 1.79769e+308 | 0.0516205 | 0.263422  |
| Syt1_j3          | 0           | 0.220839  | 0            | 1         | 1         |
| Syt1_j6          | 0           | 0.402625  | 0            | 1         | 1         |
| Nav3_j8          | 0.842588    | 0.885424  | 0.0715424    | 0.781297  | 0.926119  |
| Nav3_j9          | 0.000106592 | 0.192377  | 10.8176      | 0.662815  | 0.872283  |
| Nav3_j10         | 0.0142869   | 0.0483711 | 1.75945      | 0.0760997 | 1         |
| Zdhhc17_j8       | 0           | 0.288844  | 0            | 1         | 1         |
| Zdhhc17_j9       | 0.620797    | 0.678394  | 0            | 1         | 1         |
| Glpr1_j2         | 0.829447    | 0.990706  | 0.256308     | 0.559922  | 0.820916  |
| Lgr5_j3          | 0.319145    | 0.34856   | 0            | 1         | 1         |
| Cnot2_j4         | 2.62311     | 4.05395   | 0            | 1         | 1         |
| Cnot2_j5         | 0.0431998   | 0.160864  | 0            | 1         | 1         |
| XLOC_003014      | 0.0713145   | 0.135872  | 0.929983     | 0.259839  | 1         |

|             |            |           |              |           |           |
|-------------|------------|-----------|--------------|-----------|-----------|
| XLOC_003014 | 2.27E-06   | 0.0660103 | 14.8248      | 0.997854  | 1         |
| helB        | 0.173506   | 0.252899  | 0.543573     | 0.425463  | 0.74056   |
| Helb_j5     | 0.346082   | 0.222612  | -0.636582    | 0.200422  | 0.543772  |
| Lemd3_j3    | 2.75255    | 2.72338   | -0.0153708   | 0.941679  | 0.982193  |
| Xpot_j5     | 5.38313    | 5.64694   | 0            | 1         | 1         |
| Xpot_j9     | 0.315106   | 0.606982  | 0.945818     | 0.361097  | 0.695733  |
| Gm9079      | 0.927307   | 1.09411   | 0.238645     | 0.375581  | 0.707831  |
| Slc16a7_j1  | 0          | 0.125019  | 0            | 1         | 1         |
| Xrcc6bp1_j1 | 0.058681   | 0.0959807 | 0.709852     | 0.576325  | 1         |
| Xrcc6bp1_j5 | 1.30371    | 1.23604   | -0.0768877   | 0.870416  | 0.958726  |
| Os9_j2      | 0          | 0.546966  | 1.79769e+308 | 9.48E-07  | 3.95E-05  |
| Arhgef25_j6 | 1.99863    | 1.76206   | 0            | 1         | 1         |
| Dtx3_j3     | 0.821608   | 0.959258  | 0            | 1         | 1         |
| Dtx3_j4     | 2.45385    | 4.60454   | 0            | 1         | 1         |
| Kif5a_j2    | 24.8429    | 19.92     | 0            | 1         | 1         |
| Gli1        | 0          | 0.131752  | 1.79769e+308 | 0.0021912 | 1         |
| Nab2_j4     | 4.72471    | 5.56436   | 0            | 1         | 1         |
| Obfc2b_j1   | 22.7723    | 21.1812   | 0            | 1         | 1         |
| Myl6_j5     | 0.40476    | 1.4513    | 0            | 1         | 1         |
| Myl6_j6     | 124.796    | 146.407   | 0            | 1         | 1         |
| Esyt1_j1    | 42.0098    | 69.2439   | 0            | 1         | 1         |
| Zc3h10_j3   | 0          | 0.394536  | 0            | 1         | 1         |
| Rpl41_j4    | 1.3819     | 3.28106   | 0            | 1         | 1         |
| Rab5b_j7    | 0.732971   | 0.130474  | -2.48999     | 0.000543  | 0.008744  |
| Rab5b_j8    | 0          | 0.242836  | 1.79769e+308 | 0.0010393 | 0.0147256 |
| Rab5b_j9    | 0.00240101 | 0.509401  | 7.72901      | 0.0485283 | 0.253646  |
| Cdk2_j3     | 0.119507   | 0.284498  | 1.25133      | 0.111547  | 0.415659  |
| Syne1_j1    | 0          | 0.170369  | 0            | 1         | 1         |
| Syne1_j10   | 0.0543245  | 0.209573  | 0            | 1         | 1         |
| Syne1_j11   | 0.139409   | 0.206386  | 0            | 1         | 1         |
| Syne1_j1    | 0.270326   | 0.238611  | -0.180041    | 1         | 1         |
| XLOC_002183 | 0.0410005  | 0.0508249 | 0            | 1         | 1         |
| XLOC_002183 | 0.210579   | 0.183376  | 0            | 1         | 1         |
| XLOC_002183 | 0.132441   | 0.145322  | 0.133906     | 1         | 1         |
| Syne1_j11   | 4.8271     | 4.30279   | 0            | 1         | 1         |
| Syne1_j12   | 1.86624    | 2.03803   | 0            | 1         | 1         |
| Rmnd1_j2    | 4.22676    | 5.94809   | 0.492875     | 0.0325714 | 0.1962    |
| Rmnd1_j9    | 0.0622467  | 0.11333   | 0.864462     | 0.161076  | 1         |
| Nup43       | 3.90242    | 3.2932    | -0.244879    | 0.217013  | 0.563119  |
| XLOC_002193 | 0.0217047  | 0.0849742 | 1.96902      | 0.282163  | 1         |
| XLOC_002194 | 0.159024   | 0.29541   | 0            | 1         | 1         |
| Shprh_j1    | 1.80377    | 1.38649   | -0.37958     | 0.0197647 | 0.139703  |
| Fbxo30_j1   | 0.909746   | 1.25054   | 0.459021     | 0.160784  | 0.495357  |
| Plagl1_j4   | 1.53389    | 1.59354   | 0            | 1         | 1         |
| Plagl1_j3   | 0          | 0.820949  | 0            | 1         | 1         |
| XLOC_002204 | 0.025834   | 0.139015  | 2.4279       | 0.0698289 | 1         |
| Nhsl1_j2    | 0.701191   | 0.420812  | -0.73663     | 0.0017948 | 0.0229315 |

|                  |           |           |              |           |           |
|------------------|-----------|-----------|--------------|-----------|-----------|
| Nhsl1_j1         | 0.215257  | 0.519054  | 1.26982      | 2.23E-06  | 8.38E-05  |
| AK044491_j2      | 0.0998566 | 0.312742  | 1.64704      | 0.283729  | 0.632126  |
| Ifngr1_j1        | 2.05297   | 2.10993   | 0            | 1         | 1         |
| Map3k5_j2        | 0         | 0.0629758 | 0            | 1         | 1         |
| Mtap7_j1         | 2.41262   | 2.40965   | 0            | 1         | 1         |
| Fam54a_j2        | 4.89E-06  | 0.112932  | 14.4953      | 0.994728  | 1         |
| Ahi1_j5          | 8.2848    | 8.20951   | -0.0131707   | 0.934146  | 0.979958  |
| Raet1e           | 0.032998  | 0.292861  | 3.14976      | 0.048301  | 0.252794  |
| Raet1a_j1        | 0.0294755 | 0.157771  | 2.42025      | 0.20177   | 0.545317  |
| H60b_j1          | 0.032002  | 0.183373  | 2.51855      | 0.181115  | 0.521082  |
| 1110021L09Rik_j3 | 0.602672  | 0.948323  | 0            | 1         | 1         |
| Med23_j2         | 0         | 0.0656823 | 1.79769e+308 | 0.0504713 | 1         |
| Med23_j5         | 0.820098  | 1.71804   | 1.0669       | 0.0773301 | 0.336628  |
| Epb4.1l2_j6      | 0         | 0.217055  | 1.79769e+308 | 0.0027811 | 0.032421  |
| Epb4.1l2_j9      | 0.464821  | 0.774299  | 0.736217     | 0.180835  | 0.520645  |
| Arhgap18         | 0.190343  | 0.593841  | 1.64148      | 7.54E-05  | 0.0016839 |
| Arhgap18_j7      | 3.18E-05  | 0.0630879 | 10.9548      | 0.952839  | 1         |
| 6330407J23Rik_j2 | 16.3669   | 19.1845   | 0            | 1         | 1         |
| 6330407J23Rik_j3 | 15.463    | 15.6557   | 0            | 1         | 1         |
| XLOC_002238      | 0.0189202 | 0.0839019 | 0            | 1         | 1         |
| Hdac2_j4         | 7.52399   | 13.6885   | 0            | 1         | 1         |
| Lama4_j1         | 0.434551  | 0.697764  | 0.683214     | 0.0183881 | 0.133078  |
| Fyn_j1           | 5.45773   | 7.82933   | 0            | 1         | 1         |
| Rev3l_j3         | 0.0839264 | 0.242384  | 0            | 1         | 1         |
| Zbtb24_j1        | 0         | 0.0696825 | 1.79769e+308 | 0.117895  | 1         |
| Mical1_j4        | 0.14676   | 0.121379  | -0.273943    | 0.713467  | 0.896209  |
| Mical1_j6        | 0         | 0.0799178 | 1.79769e+308 | 0.001949  | 1         |
| Sesn1_j1         | 2.94084   | 5.2271    | 0            | 1         | 1         |
| Sec63_j3         | 6.87825   | 6.9831    | 0.0218258    | 0.851883  | 0.952976  |
| Scml4_j2         | 0         | 0.17115   | 1.79769e+308 | 0.0006616 | 0.0102667 |
| Lilrb4           | 0.139833  | 0.275795  | 0.97989      | 0.238147  | 0.585036  |
| Slc35f1_j2       | 8.23343   | 7.1223    | -0.20915     | 0.0837985 | 0.353054  |
| Fabp7_j2         | 131.048   | 131.843   | 0            | 1         | 1         |
| Smpdl3a_j1       | 10.0035   | 7.98933   | 0            | 1         | 1         |
| Gcc2_j3          | 1.76797   | 1.67556   | -0.0774508   | 0.794292  | 0.931391  |
| Ccdc138_j2       | 0.116909  | 0.103185  | -0.180162    | 0.841056  | 1         |
| Ccdc138_j9       | 0.0600536 | 0.210967  | 1.8127       | 0.0370927 | 0.213277  |
| Sh3rf3_j6        | 0         | 0.171575  | 1.79769e+308 | 6.60E-05  | 0.0015104 |
| XLOC_002308      | 0.0743192 | 0.120598  | 0.698402     | 0.468011  | 1         |
| Dna2_j7          | 0         | 0.0722112 | 1.79769e+308 | 0.103036  | 1         |
| Jmjd1c_j1        | 0.095835  | 0.158577  | 0.726556     | 0.138131  | 0.462105  |
| Rtkn2_j6         | 0.106258  | 0.10477   | -0.0203363   | 0.991537  | 1         |
| Rhobtb1          | 0         | 0.382381  | 1.79769e+308 | 6.92E-05  | 0.0015708 |
| Ank3_j12         | 0         | 0.0693837 | 1.79769e+308 | 0.115271  | 1         |
| Zwint_j1         | 0.597281  | 2.3025    | 1.94672      | 3.44E-06  | 0.0001221 |
| av_j1            | 0.0211278 | 0.183049  | 3.11502      | 0.0051784 | 0.0520709 |
| Gnaz_j2          | 0         | 0.448537  | 0            | 1         | 1         |

|                  |            |           |              |           |           |
|------------------|------------|-----------|--------------|-----------|-----------|
| Rab36_j4         | 0.427706   | 0.367891  | 0            | 1         | 1         |
| Rab36_j6         | 1.73804    | 1.25493   | 0            | 1         | 1         |
| Specc1l_j3       | 0.900963   | 0.634008  | 0            | 1         | 1         |
| Adora2a_j4       | 0.122834   | 0.382801  | 1.63989      | 0.015108  | 0.115464  |
| Upb1_j1          | 0.0418753  | 0.122708  | 1.55106      | 0.434544  | 1         |
| Ggt1_j1          | 0.115282   | 0.133611  | 0.212876     | 0.837829  | 1         |
| Ggt1_j3          | 0.218018   | 0.232105  | 0.0903308    | 0.920031  | 0.974931  |
| Ggt5_j1          | 0          | 0.27005   | 1.79769e+308 | 0.0411141 | 0.227975  |
| Lss_j4           | 0.564086   | 2.75716   | 0            | 1         | 1         |
| Pofut2_j2        | 0.163834   | 0.251366  | 0.61756      | 0.453679  | 0.758165  |
| C330046G03Rik    | 0.00425585 | 0.105247  | 4.62819      | 0.13543   | 1         |
| Slc1a6_j2        | 2.55151    | 2.27181   | -0.167509    | 0.474387  | 0.770681  |
| Hcn2_j2          | 8.63261    | 6.95523   | -0.3117      | 0.0541715 | 0.271297  |
| Abca7_j5         | 5.33996    | 4.71147   | 0            | 1         | 1         |
| Abca7_j4         | 9.0811     | 8.80245   | 0            | 1         | 1         |
| Hmha1            | 0          | 0.073605  | 1.79769e+308 | 0.027443  | 1         |
| Hmha1_j11        | 0.299241   | 0.624795  | 1.06208      | 0.0272331 | 0.174381  |
| Gpx4_j3          | 0.0367287  | 0.367464  | 3.32262      | 1.12E-13  | 1.84E-11  |
| Stk11_j1         | 9.26595    | 10.3638   | 0            | 1         | 1         |
| Cirbp_j2         | 2.65603    | 2.00108   | -0.40849     | 0.100548  | 0.392533  |
| Ndufs7_j3        | 0.02474    | 0.0594582 | 1.26503      | 0.626974  | 1         |
| Ndufs7_j2        | 0.820395   | 1.65823   | 1.01526      | 0.0275764 | 0.175817  |
| Rps15_j4         | 0.268364   | 0.213554  | -0.329589    | 0.725717  | 0.902548  |
| Csnk1g2_j3       | 8.17361    | 10.1925   | 0            | 1         | 1         |
| Csnk1g2_j2       | 2.01914    | 2.02064   | 0            | 1         | 1         |
| Dot1l_j5         | 0.337019   | 0.245633  | -0.456325    | 0.238101  | 0.585036  |
| Tmprss9_j4       | 0.223221   | 0.199273  | -0.163729    | 0.749074  | 0.912835  |
| XLOC_002428      | 0          | 0.0591866 | 1.79769e+308 | 0.172787  | 1         |
| Zfr2_j3          | 0.586952   | 0.983792  | 0            | 1         | 1         |
| 2210404O07Rik_j2 | 0          | 0.139416  | 1.79769e+308 | 0.0685777 | 1         |
| Aes_j3           | 111.099    | 119.532   | 0            | 1         | 1         |
| BC025920_j1      | 0.0271447  | 0.193759  | 2.83552      | 0.102317  | 0.396354  |
| Ankrd24_j9       | 0.401089   | 0.886131  | 0            | 1         | 1         |
| Ankrd24_j12      | 0          | 0.176406  | 0            | 1         | 1         |
| Ankrd24_j11      | 0.152765   | 0.108742  | 0            | 1         | 1         |
| XLOC_002446      | 0.123723   | 0.113166  | -0.128677    | 0.878702  | 1         |
| XLOC_002448      | 0.0234441  | 0.216942  | 3.21001      | 0.173492  | 0.511284  |
| BC062115_j8      | 0          | 0.113861  | 1.79769e+308 | 0.0179843 | 1         |
| Tdg_j6           | 0.471514   | 0.706724  | 0.583846     | 0.0983278 | 0.387686  |
| D10Wsu102e_j1    | 0.21766    | 0.627621  | 1.52782      | 0.0006209 | 0.0097644 |
| Tcp11l2_j1       | 3.52368    | 3.79421   | 0.106714     | 0.692771  | 0.8862    |
| Polr3b_j1        | 3.47039    | 4.51387   | 0.379269     | 0.0527653 | 0.266888  |
| Ric8b_j3         | 0.30447    | 0.34932   | 0            | 1         | 1         |
| Btbd11_j1        | 0          | 0.166808  | 0            | 1         | 1         |
| Nt5dc3_j2        | 1.90354    | 5.06013   | 0            | 1         | 1         |
| Pmch_j2          | 0.0777612  | 0.189315  | 1.28367      | 0.24286   | 0.59027   |
| Uhrf1bp1_j7      | 0.0290849  | 0.29075   | 3.32144      | 0.0009833 | 0.0141016 |

|                   |            |           |              |           |          |
|-------------------|------------|-----------|--------------|-----------|----------|
| Ikbip_j2          | 0          | 0.0657149 | 1.79769e+308 | 0.184705  | 1        |
| AK144329          | 0.150691   | 0.185271  | 0.298044     | 0.741752  | 0.909442 |
| Lta4h_j2          | 1.78173    | 2.62896   | 0.561211     | 0.048761  | 0.254425 |
| Ndufa12_j2        | 7.34737    | 6.89861   | -0.0909215   | 0.632625  | 0.857248 |
| XLOC_002519       | 0.109362   | 0.0303599 | -1.84888     | 0.265829  | 1        |
| Kitlg_j1          | 0.0968505  | 0.0742164 | 0            | 1         | 1        |
| Slc6a15_j3        | 0.184057   | 0.384593  | 1.06318      | 0.159317  | 0.493926 |
| Ppp1r12a_j3       | 9.98537    | 10.7128   | 0            | 1         | 1        |
| Nap1l1_j3         | 1.01779    | 0.912833  | 0            | 1         | 1        |
| Zfc3h1_j4         | 0.526968   | 0.707898  | 0            | 1         | 1        |
| AK020834_j3       | 0.175051   | 0.15469   | 0            | 1         | 1        |
| AK020834_j4       | 0.353669   | 0.283885  | 0            | 1         | 1        |
| Ptprr_j2          | 4.67973    | 4.71359   | 0            | 1         | 1        |
| AK016788_j1       | 0.01329    | 0.145719  | 0            | 1         | 1        |
| XLOC_002559       | 0.100456   | 0.126541  | 0.333039     | 0.732979  | 1        |
| XLOC_002559       | 0.0831288  | 0.201267  | 1.27569      | 0.147015  | 0.475412 |
| Llph_j3           | 3.78637    | 4.34541   | 0.19868      | 0.25259   | 0.600518 |
| Ppm1h_j6          | 0.940614   | 1.15575   | 0            | 1         | 1        |
| Fam19a2_j2        | 1.90146    | 0.989997  | -0.941615    | 0.00018   | 0.003516 |
| Fam19a2_j4        | 0.0392356  | 0.0823735 | 1.07002      | 0.332114  | 1        |
| Ctdsp2_j1         | 0.238266   | 0.463117  | 0.958803     | 0.212902  | 0.557744 |
| Avil_j15          | 0.368714   | 0.85211   | 0            | 1         | 1        |
| Arhgap9_j1        | 0.224528   | 0.345846  | 0.623231     | 0.155738  | 0.488998 |
| Stac3_j14         | 0.0631647  | 0.13916   | 1.13955      | 0.438103  | 1        |
| Myo1a_j10         | 0.328431   | 0.116418  | 0            | 1         | 1        |
| Naca_j6           | 0.0883523  | 0.136788  | 0.6306       | 0.582174  | 1        |
| XLOC_002597       | 0.150361   | 0.176717  | 0.233009     | 0.690892  | 0.885572 |
| Ptges3_j2         | 0.996367   | 2.62533   | 1.39775      | 2.19E-08  | 1.42E-06 |
| Baz2a_j5          | 0.046949   | 0.0532314 | 0.181183     | 0.76742   | 1        |
| Baz2a_j7          | 0.131287   | 0.136165  | 0.0526403    | 0.892253  | 1        |
| Gls2_j1           | 0.770043   | 0.62662   | 0            | 1         | 1        |
| Pan2_j7           | 0.161423   | 0.188664  | 0.224974     | 0.687511  | 0.883849 |
| Cnpy2_j3          | 0.0562085  | 0.13861   | 1.30217      | 0.482476  | 1        |
| Ankrd52_j2        | 9.65188    | 10.6422   | 0            | 1         | 1        |
| Rnf41             | 5.79631    | 5.54609   | 0            | 1         | 1        |
| Rnf41_j3          | 15.1004    | 17.3169   | 0            | 1         | 1        |
| Mmp19_j1          | 0.358695   | 0.569488  | 0.666907     | 0.0371625 | 0.213498 |
| Dnajc14           | 6.29512    | 6.03022   | 0            | 1         | 1        |
| XLOC_002619       | 0.264402   | 0.372666  | 0.495151     | 0.58299   | 0.832997 |
| Akap12_j6         | 0          | 1.91175   | 0            | 1         | 1        |
| Pcmt1_j1          | 0          | 0.668348  | 0            | 1         | 1        |
| Tab2_j1           | 6.02362    | 7.85491   | 0            | 1         | 1        |
| Ust_j1            | 0.0953138  | 0.07775   | 0            | 1         | 1        |
| 9130014G24Rik_j4  | 0.0675908  | 0.152446  | 1.1734       | 0.285128  | 1        |
| 9130014G24Rik_j5  | 0.0580583  | 0.0845067 | 0.541565     | 0.699413  | 1        |
| 9130014G24Rik_j10 | 0.00813085 | 0.187063  | 4.52398      | 0.0942226 | 0.378265 |
| Utrn_j4           | 3.86772    | 6.30759   | 0            | 1         | 1        |



|                  |             |           |              |           |           |
|------------------|-------------|-----------|--------------|-----------|-----------|
| XLOC_002652      | 0.0725006   | 0.128539  | 0.826141     | 0.450245  | 1         |
| Heca_j1          | 4.27169     | 7.05934   | 0            | 1         | 1         |
| XLOC_002674      | 0.0330552   | 0.099885  | 1.59539      | 0.316713  | 1         |
| Rps12_j7         | 0           | 0.0781786 | 1.79769e+308 | 0.107362  | 1         |
| Arg1_j1          | 0           | 0.105084  | 1.79769e+308 | 0.0725189 | 1         |
| Akap7_j7         | 5.35E-05    | 0.379851  | 12.7936      | 0.919589  | 0.974745  |
| XLOC_002682      | 0.292998    | 0.253386  | -0.209554    | 0.723488  | 0.901501  |
| L3mbtl3          | 0.1791      | 0.152481  | 0            | 1         | 1         |
| Lama2_j8         | 0.0717247   | 0.057846  | -0.310253    | 0.623562  | 1         |
| Cenpw_j1         | 0.470984    | 0.525692  | 0.158539     | 0.866993  | 0.95789   |
| Nkain2_j1        | 0.764347    | 1.10029   | 0.525586     | 0.124851  | 0.440234  |
| Nkain2_j4        | 0.206995    | 0.275327  | 0.411549     | 0.453585  | 0.758086  |
| Rwdd1_j3         | 0           | 0.192083  | 0            | 1         | 1         |
| 1700025K23Rik_j1 | 0.44407     | 0.350967  | -0.339452    | 0.716461  | 0.89763   |
| Gm16365_j2       | 0.749334    | 1.05448   | 0            | 1         | 1         |
| Gm16365_j1       | 0.0972249   | 0.0911498 | -0.0930867   | 0.949759  | 1         |
| AA474331_j3      | 0           | 0.112724  | 1.79769e+308 | 0.0101539 | 1         |
| Rpf2_j8          | 0           | 0.158683  | 0            | 1         | 1         |
| Cdc40_j1         | 2.7702      | 2.81339   | 0            | 1         | 1         |
| Ccdc162_j8       | 0.0123014   | 0.33392   | 4.76261      | 0.005908  | 0.0578094 |
| XLOC_002728      | 0.0516925   | 0.12195   | 1.23826      | 0.38615   | 1         |
| Armc2_j1         | 0           | 0.056966  | 1.79769e+308 | 0.0547721 | 1         |
| Sobp_j1          | 0.155952    | 0.182789  | 0.229079     | 0.805362  | 0.935633  |
| Aim1_j2          | 0.721108    | 2.01283   | 1.48094      | 4.98E-11  | 5.40E-09  |
| Lin28b_j13       | 0           | 0.36887   | 1.79769e+308 | 1.11E-07  | 5.88E-06  |
| AK005653_j1      | 0.638664    | 1.0154    | 0            | 1         | 1         |
| Mcm9_j6          | 0.0177271   | 0.111224  | 2.64944      | 0.0963348 | 1         |
| Man1a_j1         | 0.853257    | 1.31133   | 0.619983     | 0.0236341 | 0.157956  |
| Serinc1_j2       | 2.09062     | 1.52077   | 0            | 1         | 1         |
| Serinc1_j3       | 3.15988     | 4.57457   | 0            | 1         | 1         |
| Ddit4_j1         | 30.1521     | 33.9321   | 0.170388     | 0.0965187 | 0.383809  |
| Cdh23_j1         | 0.09451     | 0.141528  | 0.582545     | 0.512625  | 1         |
| X99384_j1        | 7.14E-05    | 0.056928  | 0            | 1         | 1         |
| Col13a1_j10      | 0           | 0.195698  | 1.79769e+308 | 0.0171044 | 0.126323  |
| Col13a1_j12      | 0.029984    | 0.090918  | 1.60037      | 0.211114  | 1         |
| Hk1_j3           | 0           | 0.974859  | 0            | 1         | 1         |
| Supv3l1_j2       | 0.94754     | 1.3112    | 0            | 1         | 1         |
| Supv3l1_j5       | 4.01017     | 4.07001   | 0            | 1         | 1         |
| Vps26a_j1        | 0.000458321 | 1.85463   | 0            | 1         | 1         |
| Ddx21_j2         | 0.000169827 | 2.09864   | 0            | 1         | 1         |
| Ddx50_j8         | 0           | 0.388183  | 0            | 1         | 1         |
| Tet1_j2          | 0.0678023   | 0.0773605 | 0.190264     | 0.885988  | 1         |
| XLOC_002796      | 0           | 0.117493  | 1.79769e+308 | 0.181068  | 1         |
| Nrbf2            | 9.48        | 6.98511   | 0            | 1         | 1         |
| Ube2d1_j2        | 4.31505     | 6.16343   | 0            | 1         | 1         |
| Cisd1_j1         | 35.8694     | 33.0411   | -0.118491    | 0.419944  | 0.73648   |
| Susd2_j5         | 0.190518    | 0.879397  | 2.20659      | 5.87E-07  | 2.60E-05  |

|                  |           |           |              |           |           |
|------------------|-----------|-----------|--------------|-----------|-----------|
| Cabin1_j6        | 0.224244  | 0.0752855 | 0            | 1         | 1         |
| Cabin1_j8        | 1.60691   | 2.02782   | 0            | 1         | 1         |
| Smarcb1_j2       | 0.13898   | 0.0902862 | -0.622297    | 0.660059  | 0.87104   |
| Mmp11_j1         | 0.0764461 | 0.138624  | 0.858665     | 0.383124  | 1         |
| Pcnt_j6          | 0.0663796 | 0.190175  | 0            | 1         | 1         |
| Pcbp3_j1         | 15.652    | 9.91354   | 0            | 1         | 1         |
| Pcbp3_j2         | 43.7914   | 40.5189   | 0            | 1         | 1         |
| Pcbp3_j3         | 19.0989   | 15.0068   | 0            | 1         | 1         |
| Col18a1_j5       | 0.196287  | 0.2378    | 0.276788     | 0.393703  | 0.719609  |
| Gm10941_j1       | 0.276823  | 0.223449  | -0.309017    | 0.711474  | 0.895181  |
| Adarb1_j5        | 0         | 0.207948  | 0            | 1         | 1         |
| Adarb1_j4        | 0         | 0.116805  | 0            | 1         | 1         |
| 1810008A18Rik_j1 | 1.66106   | 2.12499   | 0.355357     | 0.17265   | 0.51013   |
| 1810008A18Rik    | 0.833921  | 0.826647  | -0.0126392   | 0.969951  | 0.99148   |
| Trpm2_j1         | 0.0372098 | 0.17285   | 2.21577      | 0.0115562 | 0.0954083 |
| XLOC_002841      | 0.0621322 | 0.149508  | 1.26681      | 0.290337  | 1         |
| XLOC_002841      | 0.429623  | 0.501618  | 0.22352      | 0.597485  | 0.840295  |
| Agpat3_j7        | 23.463    | 22.1732   | -0.0815703   | 1         | 1         |
| Rrp1_j1          | 0.156096  | 0.362174  | 0            | 1         | 1         |
| Ccdc105_j2       | 0.107158  | 0.234453  | 1.12956      | 0.162949  | 0.498187  |
| Mier2_j2         | 0.1829    | 0.252941  | 0            | 1         | 1         |
| Mier2_j3         | 0.0699981 | 0.0943975 | 0            | 1         | 1         |
| Mier2_j4         | 0.138045  | 0.51685   | 0            | 1         | 1         |
| Dos              | 25.1737   | 24.8539   | 0            | 1         | 1         |
| Pcsk4_j11        | 0.0761282 | 0.105142  | 0.465837     | 0.729528  | 1         |
| Atp8b3_j8        | 0         | 0.0703864 | 1.79769e+308 | 0.10894   | 1         |
| Rexo1_j2         | 0.798248  | 0.942669  | 0            | 1         | 1         |
| Fam108a_j2       | 12.6814   | 13.8031   | 0.122273     | 0.516143  | 0.79474   |
| Btbd2_j3         | 41.3644   | 38.7884   | 0            | 1         | 1         |
| Mknk2_j2         | 0         | 0.0561654 | 0            | 1         | 1         |
| Ap3d1_j3         | 0.257239  | 5.80365   | 0            | 1         | 1         |
| Ap3d1_j4         | 0.979159  | 1.33941   | 0            | 1         | 1         |
| Lmnb2_j1         | 0.939972  | 1.07682   | 0.196088     | 0.41071   | 0.730416  |
| Atcay_j4         | 0.608928  | 0.475363  | 0            | 1         | 1         |
| Fzr1_j1          | 0         | 0.0791496 | 1.79769e+308 | 0.0099554 | 1         |
| Celf5_j6         | 0.117017  | 0.238428  | 0            | 1         | 1         |
| Gna15_j1         | 0.0723766 | 0.118012  | 0.705332     | 0.48679   | 1         |
| Tle6_j3          | 0.486184  | 0.669483  | 0.461544     | 0.504492  | 0.787732  |
| Glt8d2_j1        | 0.282687  | 0.391278  | 0.46899      | 0.336043  | 0.676511  |
| Slc41a2_j5       | 0         | 0.0714153 | 0            | 1         | 1         |
| Aldh1l2_j3       | 0.409207  | 0.445723  | 0.123317     | 0.636221  | 0.859006  |
| Appl2_j5         | 0.257259  | 0.731661  | 0            | 1         | 1         |
| XLOC_002936      | 0.775789  | 0.895425  | 0.206909     | 0.473382  | 0.770096  |
| Utp20_j4         | 3.60593   | 4.28716   | 0            | 1         | 1         |
| Ano4_j1          | 3.07278   | 3.5505    | 0            | 1         | 1         |
| Gas2l3_j1        | 0.172178  | 0.657199  | 0            | 1         | 1         |
| Gas2l3_j2        | 0.198966  | 0.0678035 | 0            | 1         | 1         |

|                  |             |           |              |           |           |
|------------------|-------------|-----------|--------------|-----------|-----------|
| Slc17a8_j4       | 0.172312    | 0.204768  | 0.248965     | 0.752215  | 0.914378  |
| Apaf1_j6         | 0.0905962   | 0.0693206 | 0            | 1         | 1         |
| Slc25a3_j1       | 201.021     | 222.799   | 0            | 1         | 1         |
| Slc25a3_j2       | 77.3593     | 72.7902   | 0            | 1         | 1         |
| XLOC_002949      | 0.329079    | 0.343721  | 0.0628043    | 0.944802  | 0.983636  |
| Rmst_j2          | 0.0356502   | 0.0822803 | 1.20664      | 0.301509  | 1         |
| Nedd1_j2         | 0.31155     | 0.475726  | 0.610666     | 0.392071  | 0.718431  |
| Elk3_j1          | 0.549448    | 1.64282   | 1.58012      | 0.0003131 | 0.0055334 |
| Vezt_j2          | 0.853528    | 1.12445   | 0            | 1         | 1         |
| 4932415G12Rik_j1 | 0.0542295   | 0.0359951 | -0.591279    | 0.523295  | 1         |
| Socs2_j1         | 0.603329    | 0.582386  | 0            | 1         | 1         |
| Socs2_j2         | 1.51046     | 1.34308   | 0            | 1         | 1         |
| Gm10754_j4       | 0.103783    | 0.279689  | 1.43025      | 0.0013683 | 0.0183939 |
| XLOC_002969      | 0.0431215   | 0.281669  | 2.70752      | 0.063373  | 0.298613  |
| Tmtc3_j5         | 0.246758    | 0.155642  | 0            | 1         | 1         |
| Tmtc3_j6         | 0.174068    | 0.161856  | 0            | 1         | 1         |
| Nts_j1           | 0           | 0.302894  | 1.79769e+308 | 0.0135065 | 0.106792  |
| Lrriq1_j8        | 0.107691    | 0.0402858 | -1.41855     | 0.28345   | 1         |
| Lrriq1_j9        | 0.142079    | 0.204049  | 0.522223     | 0.472627  | 0.769633  |
| Tmtc2_j3         | 1.41718     | 2.20122   | 0.635282     | 0.0108355 | 0.0907771 |
| BC067068_j2      | 0.0728039   | 0.207064  | 1.50799      | 0.066077  | 0.306888  |
| XLOC_002980      | 0.314416    | 0.306159  | -0.0383956   | 0.96624   | 0.990343  |
| XLOC_002980      | 0.0720564   | 0.158104  | 1.13368      | 0.422536  | 0.738516  |
| XLOC_002980      | 0           | 0.223936  | 1.79769e+308 | 0.0865425 | 0.359608  |
| Ptprq_j4         | 0           | 0.16303   | 1.79769e+308 | 0.0072365 | 0.0675736 |
| Syt1_j5          | 0           | 0.538856  | 0            | 1         | 1         |
| Zdhhc17_j5       | 2.2442      | 3.21721   | 0            | 1         | 1         |
| Zdhhc17_j6       | 0.826993    | 1.81778   | 0            | 1         | 1         |
| Tmem19_j1        | 2.70806     | 2.89296   | 0            | 1         | 1         |
| Gm239_j1         | 0.0321779   | 0.144102  | 2.16295      | 0.167373  | 1         |
| Rab3ip_j3        | 2.20859     | 2.33076   | 0            | 1         | 1         |
| Cpsf6_j5         | 3.41087     | 3.40782   | -0.00129084  | 0.995303  | 0.998726  |
| Mdm2_j1          | 0.694107    | 1.77454   | 0            | 1         | 1         |
| Slc35e3_j1       | 0.0562385   | 0.238902  | 2.08679      | 0.122318  | 0.435482  |
| Helb_j2          | 0.352707    | 0.909296  | 1.36628      | 0.0005238 | 0.0084664 |
| Helb_j4          | 0.000554489 | 0.223538  | 8.65515      | 0.453361  | 0.758032  |
| Rassf3_j2        | 8.14198     | 7.93387   | 0            | 1         | 1         |
| Xpot_j3          | 0.0632851   | 0.217907  | 0            | 1         | 1         |
| Mon2_j8          | 0.915828    | 1.39115   | 0.603133     | 0.0306034 | 0.188187  |
| Usp15_j1         | 18.0824     | 17.9459   | -0.0109285   | 0.912333  | 0.972389  |
| Xrcc6bp1_j3      | 0.313568    | 0.633655  | 1.01492      | 0.120872  | 0.432992  |
| Os9_j1           | 7.59943     | 8.14119   | 0.0993491    | 0.43831   | 0.748108  |
| Slc26a10_j3      | 0.214073    | 0.253399  | 0.243309     | 0.683136  | 0.881372  |
| Arhgef25_j1      | 0           | 0.474239  | 0            | 1         | 1         |
| Arhgef25_j3      | 1.01074     | 0.76841   | 0            | 1         | 1         |
| Arhgef25_j5      | 0.451686    | 0.595943  | 0            | 1         | 1         |
| Dtx3_j2          | 1.78983     | 0.822898  | 0            | 1         | 1         |

|              |          |                 |            |           |           |
|--------------|----------|-----------------|------------|-----------|-----------|
| Kif5a_j7     | 41.6031  | 38.4            | 0          | 1         | 1         |
| Kif5a_j8     | 94.7655  | 82.2996         | 0          | 1         | 1         |
| Mars_j1      | 1.89544  | 2.26324         | 0          | 1         | 1         |
| Mars_j4      | 2.32632  | 3.22422         | 0          | 1         | 1         |
| Mars_j3      | 4.23467  | 2.89357         | 0          | 1         | 1         |
| Mars_j2      | 4.03941  | 4.86187         | 0          | 1         | 1         |
| Lrp1_j5      | 2.45143  | 2.57782         | 0          | 1         | 1         |
| Lrp1_j4      | 0.387635 | 0.595581        | 0          | 1         | 1         |
| Zc3h10_j1    | 0.686794 | 1.33362         | 0          | 1         | 1         |
| Rpl41_j3     | 294.779  | 394.398         | 0          | 1         | 1         |
| Pa2g4_j2     | 2.6903   | 2.51521         | -0.097086  | 0.665848  | 0.873354  |
| Rps26_j3     | 0.523642 | 0.479561        | -0.126866  | 0.786067  | 0.928363  |
| Rab5b_j4     | 0.674044 | 0.628848        | -0.100132  | 0.725356  | 0.902457  |
| Cdk2_j5      | 0.180532 | 0.284516        | 0.656255   | 0.249558  | 0.596971  |
| Pisd-ps1_j3  | 5.36587  | 4.88066         | 0          | 1         | 1         |
| Eif4enif1    | 3.60053  | 3.05231         | 0          | 1         | 1         |
| Eif4enif1_j4 | 4.91464  | 5.6658          | 0          | 1         | 1         |
| Selm_j1      | 75.9714  | 70.8011         | -0.101685  | 0.307269  | 0.652244  |
| Selm         | 13.7146  | 14.7819         | 0.108116   | 0.455896  | 0.759632  |
| Morc2a_j7    | 2.31077  | 2.62819         | 0.185693   | 0.256574  | 0.605481  |
| Dusp18       | 1.46371  | 1.49369         | 0.0292518  | 0.875138  | 0.96023   |
| Dusp18_j4    | 0.240799 | 0.179577        | -0.42323   | 0.446069  | 0.75332   |
| Rnf215       | 8.37317  | 8.14683         | -0.0395343 | 0.714249  | 0.896527  |
| Sf3a1        | 1.56194  | 1.37382         | -0.185151  | 0.290271  | 0.637671  |
| Tbc1d10a     | 7.38005  | 8.98831         | 0.284419   | 0.0087917 | 0.07785   |
| Gatsl3_j2    | 0.3001   | 0 -1.79769e+308 | 0.0002829  | 0.0002829 | 0.0050904 |
| Gatsl3       | 1.23071  | 1.72354         | 0.485891   | 0.0603669 | 0.28953   |
| Ascc2        | 3.54083  | 4.06544         | 0          | 1         | 1         |
| Ascc2_j2     | 0.356552 | 0.316394        | 0          | 1         | 1         |
| Nipsnap1     | 45.4087  | 46.2238         | 0.0256647  | 0.777191  | 0.924662  |
| Thoc5        | 1.62907  | 1.64663         | 0          | 1         | 1         |
| Thoc5_j1     | 8.18096  | 8.05216         | 0          | 1         | 1         |
| Rasl10a_j1   | 2.40083  | 2.32211         | 0          | 1         | 1         |
| XLOC_003913  | 0.183353 | 0.151896        | -0.271538  | 0.361583  | 0.696104  |
| Xbp1         | 27.6441  | 33.7671         | 0.288648   | 0.0024376 | 0.0292499 |
| Xbp1_j1      | 1.34147  | 3.10694         | 1.21169    | 0.0028612 | 0.0331723 |
| Dbnl_j4      | 10.4241  | 11.4706         | 0          | 1         | 1         |
| Dbnl_j3      | 5.7438   | 5.48549         | 0          | 1         | 1         |
| Aebp1        | 0.512328 | 0.612313        | 0.257201   | 0.440695  | 0.749739  |
| Ykt6         | 36.2423  | 38.1656         | 0.0745984  | 0.406611  | 0.727764  |
| Ogdh         | 2.52633  | 1.38781         | 0          | 1         | 1         |
| Zmiz2_j2     | 21.191   | 23.0025         | 0          | 1         | 1         |
| Ccm2         | 5.66239  | 6.40141         | 0          | 1         | 1         |
| Ramp3        | 0.56484  | 1.00594         | 0.832631   | 0.0300872 | 0.186072  |
| Adcy1        | 1.19816  | 0.74788         | -0.679947  | 0.0001095 | 0.0023259 |
| Gm11992_j1   | 0.295915 | 0.281466        | -0.0722218 | 0.895505  | 0.96693   |
| Gm11992      | 0.579519 | 0.323884        | -0.839378  | 0.0475577 | 0.250399  |

|                  |           |                 |            |           |           |
|------------------|-----------|-----------------|------------|-----------|-----------|
| Upp1             | 0.636844  | 0.796713        | 0.32312    | 0.418677  | 0.735429  |
| Upp1             | 0.192538  | 0.436291        | 1.18015    | 0.133577  | 0.454829  |
| Upp1             | 0.357122  | 0.455736        | 0.351782   | 0.544203  | 0.811335  |
| Vwc2             | 0.32422   | 0.226507        | -0.517416  | 0.165807  | 0.502443  |
| 4930415F15Rik_j3 | 0.0569178 | 0.010465        | -2.4433    | 0.516459  | 1         |
| AK040873         | 0.590607  | 0.445523        | 0          | 1         | 1         |
| AK040873_j1      | 0.197189  | 0.104547        | 0          | 1         | 1         |
| Gm12005          | 5.38301   | 5.47961         | 0.0256593  | 0.918804  | 0.974658  |
| Vstm2a_j1        | 3.99948   | 2.9651          | -0.431732  | 0.0017003 | 0.0219484 |
| Vstm2a           | 1.21806   | 1.11971         | -0.121466  | 0.583272  | 0.833121  |
| Cnrip1_j1        | 0.350086  | 0.282818        | 0          | 1         | 1         |
| Ppp3r1           | 54.0376   | 44.513          | 0          | 1         | 1         |
| Wdr92            | 2.90141   | 3.08628         | 0.0891143  | 0.567072  | 0.82484   |
| C1d              | 48.7097   | 46.1467         | -0.0779808 | 0.438431  | 0.748143  |
| Glns-ps1         | 6.27552   | 6.5061          | 0.0520591  | 0.784998  | 0.927763  |
| Spred2           | 6.2896    | 3.72156         | 0          | 1         | 1         |
| Spred2_j2        | 0.0689376 | 0.285511        | 0          | 1         | 1         |
| Spred2_j4        | 14.1882   | 14.7362         | 0          | 1         | 1         |
| Rab1             | 127.729   | 135.607         | 0.0863466  | 0.31597   | 0.659904  |
| XLOC_003953      | 0.168188  | 0.0399588       | -2.07349   | 0.289685  | 0.637033  |
| Sertad2          | 2.82643   | 2.40959         | 0          | 1         | 1         |
| Sertad2          | 5.0885    | 5.45836         | 0          | 1         | 1         |
| Peli1            | 3.56579   | 3.83352         | 0          | 1         | 1         |
| Vps54            | 1.29854   | 1.20102         | 0          | 1         | 1         |
| Vps54            | 3.10112   | 3.31951         | 0          | 1         | 1         |
| Tmem17           | 1.6495    | 1.82966         | 0.149548   | 0.591425  | 0.837047  |
| Cct4_j1          | 0.335147  | 0.143967        | 0          | 1         | 1         |
| Fam161a_j3       | 0.449198  | 0.394759        | -0.18638   | 0.66787   | 0.87439   |
| Gm12059_j2       | 0.32046   | 0.260355        | -0.299665  | 0.583833  | 0.83315   |
| Gm12059          | 0.416904  | 0.560538        | 0.427099   | 0.263748  | 0.612591  |
| Xpo1_j1          | 0.280096  | 0               | 0          | 1         | 1         |
| Xpo1_j3          | 5.64554   | 4.58464         | 0          | 1         | 1         |
| Xpo1_j9          | 8.11732   | 9.3188          | 0          | 1         | 1         |
| Usp34_j10        | 1.50766   | 1.61452         | 0.0987874  | 0.444076  | 0.752021  |
| Bcl11a           | 0.525217  | 0.601743        | 0.196234   | 0.477897  | 0.77269   |
| Bcl11a           | 0.187826  | 0.396851        | 1.0792     | 0.176509  | 0.515252  |
| Fancl            | 0.605569  | 0.678082        | 0.163167   | 0.595921  | 0.839145  |
| Fancl_j1         | 0.885077  | 0.403198        | -1.13431   | 0.0358751 | 0.208963  |
| Gm12079          | 1.87678   | 1.64219         | -0.192635  | 0.708918  | 0.893983  |
| Efemp1           | 6.29472   | 7.47302         | 0.247549   | 0.0858281 | 0.357676  |
| Pnpt1_j2         | 4.76268   | 3.72408         | 0          | 1         | 1         |
| Pnpt1_j5         | 11.4341   | 11.1982         | 0          | 1         | 1         |
| Smek2            | 0.875109  | 0.772181        | -0.180524  | 0.290003  | 0.63736   |
| Ccdc88a_j2       | 2.24868   | 2.28596         | 0.0237226  | 0.835157  | 0.946964  |
| Mtif2            | 2.00906   | 1.98344         | 0          | 1         | 1         |
| Rtn4_j2          | 0.755017  | 0 -1.79769e+308 |            | 8.67E-17  | 2.20E-14  |
| Rtn4_j3          | 0.356001  | 0.273312        | -0.381331  | 0.423247  | 0.738696  |

|             |          |           |            |           |           |
|-------------|----------|-----------|------------|-----------|-----------|
| Rtn4        | 50.6092  | 68.1022   | 0.428302   | 0.0002734 | 0.0049558 |
| Gm8098      | 0.422302 | 0.160246  | -1.39799   | 0.146872  | 0.475297  |
| Gm8098_j2   | 0.41367  | 0.544642  | 0.396828   | 0.423651  | 0.739059  |
| Gm8098_j3   | 0.372059 | 0.309948  | -0.263507  | 0.702436  | 0.890916  |
| Psme4       | 10.6411  | 9.39964   | 0          | 1         | 1         |
| Psme4_j2    | 16.9506  | 19.5819   | 0          | 1         | 1         |
| Gpr75       | 0.524186 | 0.407099  | -0.364702  | 0.240749  | 0.588146  |
| Gpr75_j1    | 2.75615  | 2.52535   | -0.126173  | 0.462846  | 0.763401  |
| Asb3        | 0.617531 | 0.0702115 | -3.13673   | 9.51E-07  | 3.96E-05  |
| Cpeb4       | 4.28154  | 3.93674   | 0          | 1         | 1         |
| Cpeb4       | 1.24556  | 1.45841   | 0          | 1         | 1         |
| Cpeb4       | 5.7803   | 4.82872   | 0          | 1         | 1         |
| Cpeb4_j1    | 2.44736  | 2.45893   | 0          | 1         | 1         |
| Nsg2        | 65.272   | 66.0541   | 0.0171846  | 0.844455  | 0.950838  |
| Nsg2_j1     | 13.1174  | 12.7105   | -0.0454567 | 0.737033  | 0.907482  |
| Snrnp25     | 20.4394  | 18.703    | 0          | 1         | 1         |
| Mpg         | 1.06309  | 1.07791   | 0.0199668  | 0.895686  | 0.96693   |
| Hba-a2_j3   | 87.5246  | 114.472   | 0          | 1         | 1         |
| Sh3pxd2b    | 2.60948  | 2.28775   | 0          | 1         | 1         |
| Sh3pxd2b_j1 | 1.19244  | 1.75308   | 0          | 1         | 1         |
| Ubttd2      | 1.26564  | 1.2707    | 0.00575097 | 0.978489  | 0.993756  |
| Fbxw11_j1   | 0.567978 | 0.377833  | 0          | 1         | 1         |
| Kcnmb1_j1   | 4.00949  | 3.54913   | -0.175954  | 0.430003  | 0.743005  |
| Lcp2        | 0.314577 | 0.336016  | 0.0951131  | 0.773853  | 0.923273  |
| Lcp2_j2     | 0.544706 | 0.0921012 | -2.56419   | 1.58E-05  | 0.0004574 |
| Lcp2_j3     | 0.335774 | 0.0145777 | -4.52565   | 0.0011813 | 0.0163484 |
| Fam196b     | 1.4948   | 0.663801  | -1.17113   | 1.12E-07  | 5.92E-06  |
| Fam196b_j3  | 0.207085 | 0.0840652 | -1.30065   | 0.0353322 | 0.20706   |
| Fam196b_j2  | 0.486063 | 0.298297  | -0.704393  | 0.118845  | 0.428914  |
| Pank3       | 7.95243  | 6.69939   | 0          | 1         | 1         |
| Nudcd2      | 2.72409  | 3.60198   | 0.403013   | 0.0433044 | 0.236191  |
| Nudcd2_j1   | 3.96284  | 3.17158   | -0.321335  | 0.178288  | 0.517838  |
| Gm12141     | 59.3912  | 59.9486   | 0.0134766  | 0.877346  | 0.96086   |
| XLOC_004009 | 0.332521 | 0.116018  | -1.5191    | 0.356123  | 0.692037  |
| Slu7        | 10.2073  | 9.52819   | 0          | 1         | 1         |
| Slu7        | 4.99812  | 5.25768   | 0          | 1         | 1         |
| C1qtnf2     | 0.457974 | 0.766093  | 0.742253   | 0.0679337 | 0.312003  |
| Ccnjl       | 0.754745 | 0.764408  | 0.018352   | 0.938622  | 0.981258  |
| Pwwp2a_j2   | 0.118264 | 0.176283  | 0.575883   | 0.328823  | 0.67119   |
| Pwwp2a      | 1.52562  | 1.6081    | 0.0759627  | 0.719733  | 0.899338  |
| Rnf145      | 12.0748  | 10.5685   | 0          | 1         | 1         |
| Rnf145_j3   | 0.104066 | 0         | 0          | 1         | 1         |
| Ebf1        | 8.66895  | 8.50156   | 0          | 1         | 1         |
| Ebf4_j6     | 3.04594  | 2.00176   | 0          | 1         | 1         |
| Clint1_j1   | 5.69819  | 4.14347   | -0.459662  | 0.0124872 | 0.101118  |
| Clint1      | 9.86912  | 10.1327   | 0.0380188  | 0.77289   | 0.922948  |
| Adam19      | 7.21828  | 7.74171   | 0.100998   | 0.339893  | 0.68005   |

|                  |           |           |                 |           |           |
|------------------|-----------|-----------|-----------------|-----------|-----------|
| Adam19_j3        | 0.130327  |           | 0 -1.79769e+308 | 3.41E-06  | 1         |
| Med7             | 0.393787  | 0.393166  | -0.00227612     | 0.996313  | 0.999036  |
| Med7             | 13.2179   | 14.0438   | 0.0874364       | 0.556895  | 0.819299  |
| Med7             | 3.53084   | 3.1367    | -0.170766       | 0.339704  | 0.679924  |
| Gm12174          | 113.093   | 125.599   | 0.151321        | 0.0899186 | 0.368051  |
| Gnb2l1_j1        | 36.9494   | 41.3386   | 0.161939        | 0.141935  | 0.46851   |
| Gnb2l1           | 20.4532   | 24.3172   | 0.249651        | 0.004922  | 0.0500932 |
| Ifi47            | 2.02864   | 1.02108   | -0.99042        | 0.0014428 | 0.0191305 |
| Zfp62            | 0.128993  | 0.0758734 | 0               | 1         | 1         |
| Zfp62            | 0.130447  | 0.107954  | 0               | 1         | 1         |
| Mgat1            | 3.26343   | 2.77108   | 0               | 1         | 1         |
| Mgat1            | 4.51544   | 4.84367   | 0               | 1         | 1         |
| Mgat1            | 3.15904   | 4.7185    | 0               | 1         | 1         |
| Mgat1_j2         | 1.45159   | 0.879753  | 0               | 1         | 1         |
| Flt4_j1          | 0.178007  | 0.0168197 | -3.40371        | 0.239095  | 0.586207  |
| Gfpt2            | 0.265965  | 0.269634  | 0.0197681       | 0.965474  | 0.990079  |
| Gfpt2_j4         | 0.334858  | 0.0124838 | -4.74542        | 0.0780369 | 0.338405  |
| Mapk9            | 0.0710828 | 0.10075   | 0               | 1         | 1         |
| Mapk9            | 22.2782   | 17.1761   | 0               | 1         | 1         |
| Rasgef1c         | 2.84966   | 3.85031   | 0.434183        | 0.0063801 | 0.0614449 |
| Rnf130           | 13.0666   | 13.1038   | 0.00410622      | 0.97534   | 0.992893  |
| Rnf130           | 10.088    | 9.28565   | -0.119562       | 0.200468  | 0.543824  |
| Tbc1d9b_j1       | 55.0903   | 61.9792   | 0.169985        | 0.0481901 | 0.252609  |
| Hnrnph1_j9       | 2.16046   | 3.06482   | 0.504466        | 0.0719166 | 0.322442  |
| Adamts2_j2       | 0.540772  | 0.125122  | -2.11168        | 3.18E-05  | 0.0008118 |
| Adamts2          | 0.0715619 |           | 0 -1.79769e+308 | 0.0002675 | 1         |
| Zfp354a          | 0.262888  | 0.0531777 | -2.30556        | 0.0086916 | 0.0771917 |
| Zfp354a          | 0.538549  | 0.503605  | -0.0967861      | 0.763403  | 0.918561  |
| Clk4             | 4.36772   | 5.9858    | 0               | 1         | 1         |
| Clk4_j3          | 4.4774    | 4.19569   | 0               | 1         | 1         |
| Col23a1_j3       | 0.106172  | 0.0109289 | -3.28018        | 0.0478268 | 1         |
| Agxt2l2_j1       | 0.157255  | 0.193825  | 0.301649        | 0.600059  | 0.841543  |
| Nhp2             | 5.43651   | 6.14928   | 0.177738        | 0.159836  | 0.494363  |
| D930048N14Rik_j1 | 0.0540096 | 0.0358497 | -0.591254       | 0.671442  | 1         |
| Sar1b            | 22.5049   | 22.6428   | 0.00881311      | 0.936644  | 0.980567  |
| Cdkn2aipnl       | 16.519    | 15.7591   | -0.0679347      | 0.543178  | 0.810724  |
| Cdkl3_j6         | 1.14692   | 0.690015  | -0.733062       | 0.0348551 | 0.205078  |
| Ppp2ca           | 8.96544   | 9.56784   | 0               | 1         | 1         |
| Ppp2ca_j4        | 124.05    | 137.462   | 0               | 1         | 1         |
| Skp1a_j1         | 169.169   | 165.577   | 0               | 1         | 1         |
| Vdac1            | 63.4151   | 56.2746   | 0               | 1         | 1         |
| Vdac1_j2         | 0.295492  | 0.282864  | 0               | 1         | 1         |
| 9530068E07Rik    | 55.7017   | 51.6022   | 0               | 1         | 1         |
| Fstl4            | 0.302883  | 0.278108  | -0.123118       | 0.641708  | 0.861896  |
| Zcchc10          | 5.72252   | 4.82747   | -0.245384       | 0.170763  | 0.507662  |
| Aff4_j1          | 0.0897653 | 0.0711554 | 0               | 1         | 1         |
| Aff4             | 1.56494   | 1.35996   | 0               | 1         | 1         |

|                  |           |           |               |           |           |
|------------------|-----------|-----------|---------------|-----------|-----------|
| Shroom1_j2       | 0.0155781 | 0.0784169 | 2.33164       | 0.195872  | 1         |
| Shroom1_j5       | 0.0810137 | 0         | -1.79769e+308 | 0.0446225 | 1         |
| Kif3a            | 36.687    | 29.6953   | 0             | 1         | 1         |
| IIS              | 0.196201  | 0.0802193 | -1.29031      | 0.167663  | 0.50417   |
| Irf1             | 3.14952   | 2.85188   | -0.143221     | 0.472163  | 0.769302  |
| Irf1             | 0.85632   | 0.287806  | -1.57305      | 0.0057178 | 0.0563097 |
| P4ha2            | 1.95601   | 1.75446   | 0             | 1         | 1         |
| P4ha2            | 3.32903   | 4.52357   | 0             | 1         | 1         |
| P4ha2_j2         | 2.14521   | 2.72435   | 0             | 1         | 1         |
| Acsl6            | 26.6397   | 18.0306   | 0             | 1         | 1         |
| Fnip1            | 0.850927  | 0.833465  | -0.0299137    | 0.896376  | 0.967019  |
| Fnip1_j3         | 0.231751  | 0         | -1.79769e+308 | 8.14E-10  | 6.96E-08  |
| Hint1            | 215.666   | 235.81    | 0.12882       | 0.134867  | 0.457099  |
| Gpx3             | 4.10737   | 4.41515   | 0.104245      | 0.340454  | 0.680526  |
| Gm2a             | 8.8522    | 9.21449   | 0.0578688     | 0.577564  | 0.829807  |
| Slc36a1          | 11.4625   | 0         | 0             | 1         | 1         |
| G3bp1_j1         | 1.59676   | 1.04004   | 0             | 1         | 1         |
| G3bp1_j4         | 5.07844   | 4.79025   | 0             | 1         | 1         |
| Gria1            | 1.76733   | 1.57987   | 0             | 1         | 1         |
| Mfap3            | 3.40019   | 3.56777   | 0             | 1         | 1         |
| Galnt10          | 3.91648   | 3.50162   | 0             | 1         | 1         |
| Sap30l           | 39.9657   | 34.9472   | 0             | 1         | 1         |
| Larp1            | 26.485    | 24.964    | 0             | 1         | 1         |
| Larp1_j4         | 1.49228   | 1.76739   | 0             | 1         | 1         |
| Cnot8            | 10.5507   | 10.9227   | 0             | 1         | 1         |
| Cnot8            | 1.91426   | 0.972633  | 0             | 1         | 1         |
| Mrpl22           | 7.27008   | 7.24959   | -0.0040724    | 0.983348  | 0.99507   |
| Igtp             | 2.33601   | 2.20673   | 0             | 1         | 1         |
| Irgm2            | 3.50084   | 2.36503   | 0             | 1         | 1         |
| Zfp692-ps_j4     | 0.356171  | 0.421635  | 0.243425      | 0.497529  | 0.783786  |
| Zfp692-ps_j9     | 2.47468   | 2.53956   | 0.0373391     | 0.817809  | 0.940908  |
| Sh3bp5l          | 3.44009   | 3.45936   | 0             | 1         | 1         |
| Sh3bp5l          | 4.91862   | 3.29328   | 0             | 1         | 1         |
| Gm12258          | 4.02513   | 4.22094   | 0.0685307     | 0.587533  | 0.835056  |
| 2810021J22Rik_j1 | 0.989832  | 0.894107  | -0.146735     | 0.497134  | 0.783698  |
| 2810021J22Rik    | 0.66265   | 0.572445  | -0.21111      | 0.428938  | 0.742566  |
| Wnt9a            | 3.54664   | 4.16102   | 0.230484      | 0.0937778 | 0.377256  |
| Mprip_j3         | 0.264575  | 0         | -1.79769e+308 | 1         | 1         |
| Mprip_j2         | 0.375632  | 0.602852  | 0.682482      | 0.593503  | 0.838056  |
| Mprip_j8         | 3.53655   | 2.91439   | 0             | 1         | 1         |
| Mprip_j7         | 2.67957   | 2.41942   | 0             | 1         | 1         |
| XLOC_004102      | 0.0734044 | 0.0306905 | -1.25808      | 0.304373  | 1         |
| Med9             | 7.67535   | 7.45721   | 0             | 1         | 1         |
| 4933439F18Rik    | 2.73151   | 2.43142   | -0.167898     | 0.255073  | 0.603489  |
| Drg2_j1          | 0.12471   | 0.18501   | 0.56903       | 0.487391  | 0.778308  |
| Drg2_j3          | 0.259907  | 0.0640266 | -2.02125      | 0.266973  | 0.61606   |
| Drg2_j2          | 0.208558  | 0.152031  | -0.456086     | 0.732746  | 0.905691  |



|                  |           |             |               |           |           |
|------------------|-----------|-------------|---------------|-----------|-----------|
| Myo15_j2         | 0.0546918 | 0           | -1.79769e+308 | 0.0176325 | 1         |
| Alkbh5_j1        | 0.959981  | 0.627619    | 0             | 1         | 1         |
| Alkbh5           | 2.8459    | 2.76661     | 0             | 1         | 1         |
| Llg1             | 4.36484   | 4.26871     | -0.0321273    | 0.821134  | 0.94217   |
| Llg1_j6          | 2.33054   | 1.95031     | -0.25696      | 0.420955  | 0.737152  |
| Smcr7_j1         | 0.0759822 | 0.0686355   | 0             | 1         | 1         |
| Smcr8            | 0.710702  | 0.472183    | -0.589898     | 0.0718337 | 0.322325  |
| Smcr8_j1         | 0.450836  | 0.492023    | 0.126124      | 0.561365  | 0.821772  |
| Dhrs7b           | 2.92235   | 3.04325     | 0.0584814     | 0.651093  | 0.866086  |
| Map2k3           | 2.37176   | 2.24826     | -0.0771501    | 0.71097   | 0.894923  |
| Map2k3_j1        | 6.27023   | 7.77133     | 0.309643      | 0.0352637 | 0.206779  |
| Kcnj12_j1        | 3.2384    | 2.54022     | 0             | 1         | 1         |
| Kcnj12           | 3.30868   | 2.38711     | 0             | 1         | 1         |
| B9d1             | 0.449277  | 0.474587    | 0.0790685     | 0.753268  | 0.914707  |
| B9d1_j2          | 0.269424  | 0.117747    | -1.19418      | 0.116482  | 0.424494  |
| Grap             | 0.499915  | 0.61706     | 0.303728      | 0.477576  | 0.77269   |
| Specc1_j1        | 0.0679983 | 0.0492829   | 0             | 1         | 1         |
| Adora2b          | 1.68372   | 1.87195     | 0.152896      | 0.420547  | 0.736789  |
| Ttc19            | 2.70722   | 3.02182     | 0             | 1         | 1         |
| XLOC_004129      | 1.63405   | 1.48582     | -0.137199     | 0.817411  | 0.940822  |
| XLOC_004129      | 1.63405   | 1.48582     | -0.137199     | 0.817411  | 0.940822  |
| Ubb_j1           | 259.876   | 302.497     | 0.219096      | 0.0153294 | 0.116863  |
| Trpv2_j1         | 3.80111   | 3.86104     | 0             | 1         | 1         |
| Trpv2_j3         | 0.165074  | 0.10924     | 0             | 1         | 1         |
| 2410006H16Rik    | 4.24021   | 5.29065     | 0.319309      | 0.0309784 | 0.189775  |
| Mmgt2_j2         | 0.40424   | 0.4642      | 0.199535      | 0.742418  | 0.909901  |
| Mmgt2_j1         | 1.13693   | 0.425317    | -1.41853      | 0.0027656 | 0.0322868 |
| Trim16           | 6.62539   | 6.10748     | -0.117429     | 0.300797  | 0.647316  |
| Fbxw10_j4        | 0.0876002 | 0.000282896 | -8.27452      | 0.89577   | 1         |
| Fam18b           | 9.14501   | 8.5789      | -0.0921931    | 0.494278  | 0.782488  |
| Cdrt4_j2         | 0.259529  | 0.111833    | -1.21455      | 0.174215  | 0.512178  |
| Pmp22_j3         | 64.3029   | 66.513      | 0             | 1         | 1         |
| Pmp22_j1         | 0.382121  | 0.0219963   | 0             | 1         | 1         |
| Pmp22            | 97.6058   | 100.915     | 0             | 1         | 1         |
| Pmp22_j5         | 70.588    | 121.013     | 0             | 1         | 1         |
| Zkscan6          | 1.50897   | 1.14973     | 0             | 1         | 1         |
| Zkscan6          | 0.935478  | 1.37824     | 0             | 1         | 1         |
| Pirt             | 65.5941   | 51.5362     | 0             | 1         | 1         |
| Pirt_j1          | 0.360259  | 0.0379854   | 0             | 1         | 1         |
| 9130409J20Rik_j1 | 0.752932  | 0.217826    | -1.78934      | 0.0001707 | 0.0033612 |
| 9130409J20Rik    | 0.742336  | 0.572201    | -0.37555      | 0.35201   | 0.689134  |
| Tmem220          | 0.0643793 | 0           | -1.79769e+308 | 0.0310409 | 1         |
| Tmem220_j5       | 0.0505215 | 0           | -1.79769e+308 | 0.0533456 | 1         |
| Sco1             | 0.8054    | 0.656979    | 0             | 1         | 1         |
| Sco1_j3          | 0.0730018 | 0           | 0             | 1         | 1         |
| Gas7             | 2.75905   | 3.42665     | 0             | 1         | 1         |
| Gas7_j4          | 0.206362  | 0           | 0             | 1         | 1         |

|                   |           |                 |           |           |           |
|-------------------|-----------|-----------------|-----------|-----------|-----------|
| Stx8              | 3.1271    | 2.77118         | -0.174324 | 0.555866  | 0.818579  |
| Stx8              | 4.21203   | 4.35904         | 0.049495  | 0.677348  | 0.878715  |
| Pik3r5_j4         | 0.246743  | 0.498702        | 1.01517   | 0.0049678 | 0.0504971 |
| Pik3r6_j2         | 0.0867958 | 0 -1.79769e+308 |           | 0.0040953 | 1         |
| Myh10             | 7.32311   | 4.94827         | 0         | 1         | 1         |
| Myh10_j6          | 0.360588  | 0.058993        | 0         | 1         | 1         |
| Rpl26             | 0.810565  | 0.962106        | 0.247267  | 0.394521  | 0.719811  |
| Rpl26_j1          | 1.36297   | 1.43046         | 0.0697345 | 0.7495    | 0.913025  |
| Slc25a35          | 0.893798  | 0.690222        | 0         | 1         | 1         |
| 1500010J02Rik     | 1.45327   | 0.658935        | 0         | 1         | 1         |
| 1500010J02Rik_j7  | 2.62865   | 1.42855         | 0         | 1         | 1         |
| 1500010J02Rik_j10 | 1.98163   | 2.77172         | 0         | 1         | 1         |
| Tmem107           | 1.14502   | 1.18515         | 0.0497009 | 0.852446  | 0.953251  |
| Tmem107_j2        | 0.128304  | 0 -1.79769e+308 |           | 0.106441  | 1         |
| Vamp2             | 4.09752   | 3.86569         | 0         | 1         | 1         |
| Vamp2_j3          | 77.483    | 80.4558         | 0         | 1         | 1         |
| Per1_j2           | 0.417669  | 0.428884        | 0.0382262 | 0.91156   | 0.972265  |
| Per1              | 1.48013   | 1.88165         | 0.346275  | 0.0564076 | 0.277929  |
| Aloxe3_j2         | 0.0796325 | 0.0537416       | -0.567318 | 0.661884  | 1         |
| Alox12b           | 0.0854327 | 0.0939632       | 0.137308  | 0.883949  | 1         |
| Trappc1           | 24.848    | 25.8684         | 0.058059  | 0.558958  | 0.820307  |
| Kcnab3            | 1.01041   | 0.626698        | -0.689092 | 0.0141886 | 0.1105    |
| A030009H04Rik     | 3.61285   | 3.17959         | -0.184294 | 0.295976  | 0.64269   |
| XLOC_004173       | 0.112308  | 0.0628392       | 0         | 1         | 1         |
| Lsm1_j2           | 1.02616   | 1.10573         | 0         | 1         | 1         |
| Lsm1_j1           | 0.248669  | 0.0503795       | 0         | 1         | 1         |
| Lsm1              | 43.7535   | 45.8862         | 0         | 1         | 1         |
| Trp53_j1          | 0.0516547 | 0.0441673       | -0.22592  | 0.868317  | 1         |
| Trp53             | 1.01827   | 0.868697        | -0.2292   | 0.470224  | 0.768035  |
| Sat2              | 1.71597   | 1.49285         | -0.200956 | 0.422894  | 0.738582  |
| Sat2              | 0.897455  | 0.276428        | -1.69894  | 0.0008635 | 0.0127085 |
| Fxr2              | 29.5348   | 25.1217         | 0         | 1         | 1         |
| Fxr2_j1           | 43.6527   | 45.1146         | 0         | 1         | 1         |
| Zbtb4             | 0.541769  | 0.553993        | 0         | 1         | 1         |
| Plscr3_j2         | 1.37216   | 1.2496          | 0         | 1         | 1         |
| Plscr3            | 9.81977   | 12.8226         | 0         | 1         | 1         |
| Neur14_j1         | 10.2928   | 10.5047         | 0.0294012 | 0.77135   | 0.922315  |
| Gps2_j1           | 2.95094   | 4.63725         | 0         | 1         | 1         |
| Gps2              | 0.533936  | 0.000778812     | 0         | 1         | 1         |
| Ybx2_j1           | 0.246774  | 0.0574117       | -2.10377  | 0.0276605 | 0.176169  |
| Ybx2_j6           | 0.39181   | 0.160569        | -1.28696  | 0.0088385 | 0.0782083 |
| Ctdnep1_j1        | 22.9117   | 25.6163         | 0.160978  | 0.0712949 | 0.321059  |
| Phf23_j1          | 16.5536   | 18.7326         | 0.178406  | 0.105182  | 0.402659  |
| Gabarap_j3        | 94.6502   | 106.034         | 0.163856  | 0.115749  | 0.423327  |
| Dvl2              | 1.98333   | 2.09385         | 0.0782303 | 0.536697  | 0.807058  |
| Dlg4              | 8.62207   | 6.73093         | 0         | 1         | 1         |
| Dlg4_j1           | 7.58758   | 4.03676         | 0         | 1         | 1         |

|                  |           |                 |            |           |           |
|------------------|-----------|-----------------|------------|-----------|-----------|
| Dlg4_j2          | 31.621    | 29.5049         | 0          | 1         | 1         |
| Clec10a_j1       | 0.259022  | 0.388437        | 0.584608   | 0.311529  | 0.656199  |
| Clec10a_j3       | 0.250765  | 0.256519        | 0.0327322  | 0.968925  | 0.991253  |
| Clec10a          | 0.34083   | 0.407911        | 0.259204   | 0.631654  | 0.856763  |
| Gm12312          | 7.095     | 9.05773         | 0.352347   | 0.0462672 | 0.246534  |
| Arrb2            | 8.02254   | 7.61991         | 0          | 1         | 1         |
| Arrb2            | 2.84226   | 3.53643         | 0          | 1         | 1         |
| Med11            | 2.81667   | 3.09299         | 0.135009   | 0.417578  | 0.734655  |
| Psm6             | 127.822   | 135.375         | 0.0828213  | 0.358513  | 0.693887  |
| Pld2_j3          | 0.845666  | 0.64199         | -0.397537  | 0.179457  | 0.519116  |
| Pld2_j8          | 0.208467  | 0.399465        | 0.93825    | 0.0378669 | 0.216037  |
| Pld2_j12         | 0.312073  | 0.431359        | 0.467005   | 0.451071  | 0.756364  |
| Mink1            | 36.7004   | 37.1521         | 0.0176475  | 0.838745  | 0.948621  |
| Mink1_j1         | 0.291102  | 0.166191        | -0.80868   | 0.107426  | 0.407525  |
| XLOC_004200      | 0.0952555 | 0.111603        | 0.228501   | 0.757688  | 1         |
| Rnf167           | 15.9779   | 16.0037         | 0.00232355 | 0.980339  | 0.994006  |
| Kif1c_j1         | 0.466009  | 0.64842         | 0          | 1         | 1         |
| Kif1c_j4         | 0.832424  | 0.724001        | 0          | 1         | 1         |
| Zfp3_j1          | 0.772167  | 0.634613        | 0          | 1         | 1         |
| Zfp3             | 0.757138  | 0.553017        | 0          | 1         | 1         |
| Rabep1_j2        | 3.2541    | 2.93078         | 0          | 1         | 1         |
| Rabep1           | 8.19023   | 6.78884         | 0          | 1         | 1         |
| Rpain            | 0.0421293 | 0.0965591       | 0          | 1         | 1         |
| Mis12_j1         | 7.38854   | 6.14419         | 0          | 1         | 1         |
| Wscd1            | 0.383599  | 0.486919        | 0.344083   | 0.267816  | 0.616458  |
| Wscd1_j2         | 0.207405  | 0.242391        | 0.224885   | 0.785981  | 0.928311  |
| Fam64a           | 0.180749  | 0.489753        | 1.43807    | 0.0104192 | 0.0881303 |
| Txndc17          | 11.3674   | 13.0499         | 0.19914    | 0.076742  | 0.334846  |
| Txndc17_j2       | 64.6433   | 80.3127         | 0.313126   | 0.0153432 | 0.116931  |
| Xaf1_j1          | 1.89562   | 2.96362         | 0.644689   | 0.0270146 | 0.173484  |
| Xaf1             | 1.81912   | 2.47173         | 0.442279   | 0.0987256 | 0.388529  |
| Xaf1_j2          | 2.12098   | 2.50532         | 0.240268   | 0.409725  | 0.729962  |
| Mybbp1a          | 2.26766   | 1.76779         | 0          | 1         | 1         |
| Ube2g1           | 7.4567    | 7.848           | 0          | 1         | 1         |
| Ankfy1           | 1.71319   | 1.36433         | -0.328489  | 0.0492907 | 0.256065  |
| Zzef1_j1         | 4.5612    | 4.52529         | -0.0114038 | 0.909746  | 0.971495  |
| Atp2a3_j7        | 0.550789  | 0.590644        | 0.100788   | 0.808503  | 0.937072  |
| Camkk1_j1        | 0.91983   | 0.541361        | 0          | 1         | 1         |
| Camkk1           | 5.06175   | 3.80243         | 0          | 1         | 1         |
| 1200014J11Rik_j1 | 2.12967   | 1.64741         | -0.370436  | 0.155081  | 0.488311  |
| 1200014J11Rik    | 1.61736   | 1.77566         | 0.134712   | 0.268686  | 0.617595  |
| Itgae_j3         | 0.166114  | 0.106689        | -0.638764  | 0.523819  | 0.799611  |
| Shpk             | 0.391081  | 0.352584        | 0          | 1         | 1         |
| Shpk_j2          | 1.13079   | 0.994569        | 0          | 1         | 1         |
| Shpk_j3          | 1.96058   | 2.34964         | 0          | 1         | 1         |
| Trpv1            | 34.3728   | 38.1072         | 0.148796   | 0.0902699 | 0.3689    |
| Trpv1_j2         | 0.0844644 | 0 -1.79769e+308 | 0.0078104  | 0.0078104 | 1         |

|                  |           |           |            |           |          |
|------------------|-----------|-----------|------------|-----------|----------|
| XLOC_004224      | 0.20737   | 0.233796  | 0.173041   | 0.643046  | 0.862213 |
| Mett10d          | 1.48771   | 1.42655   | -0.0605607 | 0.643832  | 0.862757 |
| Mnt              | 1.37053   | 1.00486   | 0          | 1         | 1        |
| Rtn4rl1          | 16.814    | 11.8148   | 0          | 1         | 1        |
| Rtn4rl1_j1       | 6.08657   | 1.98919   | 0          | 1         | 1        |
| XLOC_004233      | 0.0766686 | 0.0724108 | 0          | 1         | 1        |
| 2210403K04Rik    | 11.5417   | 11.5692   | 0.0034306  | 0.979617  | 0.994006 |
| Tlcd2_j1         | 0.582083  | 0.626873  | 0.106948   | 0.742947  | 0.909993 |
| Prpf8            | 7.67067   | 3.30019   | 0          | 1         | 1        |
| Rilp_j2          | 0.316534  | 0.0895426 | -1.82171   | 0.0605055 | 0.290023 |
| Rilp             | 0.699372  | 0.76679   | 0.132772   | 0.706119  | 0.89266  |
| Slc43a2_j1       | 5.21412   | 4.54943   | -0.196738  | 0.0590644 | 0.28563  |
| Slc43a2_j2       | 1.18093   | 0.978906  | -0.270675  | 0.410734  | 0.730416 |
| Pitpna_j1        | 1.66742   | 1.14269   | 0          | 1         | 1        |
| Pitpna_j2        | 6.58995   | 5.29043   | 0          | 1         | 1        |
| Myo1c            | 2.71971   | 2.89766   | 0          | 1         | 1        |
| Crk              | 7.54263   | 7.43641   | 0          | 1         | 1        |
| Ywhae            | 22.6226   | 21.4238   | -0.078547  | 0.441005  | 0.749878 |
| Ywhae_j4         | 263.01    | 259.471   | -0.0195425 | 0.820398  | 0.941839 |
| Fam57a           | 3.36956   | 3.65769   | 0.118372   | 0.293298  | 0.640282 |
| Timm22           | 12.7979   | 12.3413   | -0.0524165 | 0.619659  | 0.850766 |
| Tusc5_j2         | 12.4375   | 6.83085   | 0          | 1         | 1        |
| Blmh             | 22.3906   | 24.7182   | 0.142677   | 0.138177  | 0.462226 |
| Slc6a4           | 2.2279    | 8.1251    | 1.8667     | 0         | 0        |
| Gm12345          | 8.72299   | 9.50032   | 0.123153   | 0.413101  | 0.731973 |
| Ssh2_j1          | 0.379142  | 0.2455    | 0          | 1         | 1        |
| Ssh2_j3          | 0.34538   | 0         | 0          | 1         | 1        |
| Git1             | 0.982278  | 1.06785   | 0.120511   | 0.501595  | 0.785697 |
| Gm12734          | 7.87211   | 8.05417   | 0.0329851  | 0.835188  | 0.946964 |
| Nufip2_j1        | 7.7825    | 8.24494   | 0.0832753  | 0.376095  | 0.708143 |
| Myo18a_j1        | 5.45256   | 4.89994   | 0          | 1         | 1        |
| Myo18a_j3        | 0.614414  | 0.440992  | 0          | 1         | 1        |
| Sez6             | 8.94766   | 7.77378   | 0          | 1         | 1        |
| Sez6_j4          | 0.648925  | 0         | 0          | 1         | 1        |
| Phf12            | 1.34077   | 1.23527   | 0          | 1         | 1        |
| Phf12_j3         | 4.46237   | 4.38671   | 0          | 1         | 1        |
| Flot2_j4         | 0.171203  | 0.218513  | 0          | 1         | 1        |
| Flot2_j3         | 1.4188    | 2.03557   | 0          | 1         | 1        |
| Flot2_j12        | 0.0387985 | 0.0472815 | 0          | 1         | 1        |
| BC017647         | 0.997304  | 1.21685   | 0.287048   | 0.112219  | 0.416855 |
| Tlcd1            | 1.64169   | 1.69255   | 0          | 1         | 1        |
| Tlcd1            | 0.868953  | 0.953141  | 0          | 1         | 1        |
| Rab34            | 0.322506  | 0.277641  | -0.216106  | 0.620196  | 0.850928 |
| Rab34_j2         | 0.35646   | 0.208448  | -0.774048  | 0.350362  | 0.687781 |
| Sdf2             | 15.9952   | 17.0338   | 0          | 1         | 1        |
| 2610507B11Rik    | 12.181    | 11.3328   | 0          | 1         | 1        |
| 2610507B11Rik_j5 | 27.4311   | 32.8427   | 0          | 1         | 1        |

|               |           |                 |            |           |           |
|---------------|-----------|-----------------|------------|-----------|-----------|
| Spag5_j1      | 0.0399703 | 0.0483127       | 0.273474   | 0.804719  | 1         |
| Spag5         | 0.401562  | 0.261135        | -0.620824  | 0.0786874 | 0.340223  |
| Aldoc         | 89.8486   | 68.4224         | -0.393028  | 9.07E-06  | 0.0002851 |
| Pigs_j2       | 23.1557   | 23.1648         | 0.00056608 | 0.996387  | 0.999052  |
| Unc119        | 18.9904   | 13.2066         | -0.524019  | 9.64E-05  | 0.0020871 |
| Slc46a1       | 2.23425   | 1.93562         | 0          | 1         | 1         |
| Vtn_j1        | 0.850259  | 0.00163186      | -9.02524   | 0.295899  | 0.642638  |
| Ift20         | 2.73197   | 2.72034         | 0          | 1         | 1         |
| XLOC_004280   | 0.0912984 | 0.0877933       | -0.0564778 | 0.969848  | 1         |
| 1810012P15Rik | 0.451809  | 0.284087        | 0          | 1         | 1         |
| Nf1_j3        | 3.66371   | 2.92229         | -0.326205  | 0.0037542 | 0.0410081 |
| Nf1_j5        | 8.89424   | 7.93681         | -0.164314  | 0.106053  | 0.404324  |
| Rab11fip4     | 0.144819  | 0.0860276       | 0          | 1         | 1         |
| Gm11204       | 4.50365   | 4.14344         | -0.120264  | 0.79284   | 0.931005  |
| Suz12         | 4.81322   | 3.67015         | 0          | 1         | 1         |
| Atad5_j3      | 0.0629391 | 0 -1.79769e+308 |            | 0.002626  | 1         |
| Adap2         | 0.242841  | 0.561337        | 1.20886    | 0.0019929 | 0.0248871 |
| Rnf135        | 0.867663  | 0.673357        | -0.365763  | 0.342012  | 0.681849  |
| Rnf135_j1     | 0.811966  | 0.887779        | 0.128781   | 0.725449  | 0.902457  |
| Rnf135        | 1.34885   | 1.30106         | -0.0520472 | 0.847718  | 0.951788  |
| Rhot1         | 8.83791   | 9.14847         | 0.0498254  | 0.696994  | 0.8885    |
| Rhot1         | 8.67774   | 6.54382         | -0.407185  | 0.0019123 | 0.0241088 |
| Rhbdl3        | 3.57408   | 1.90937         | -0.904476  | 7.63E-08  | 4.26E-06  |
| Psmd11_j5     | 0.765095  | 0.452856        | -0.756587  | 0.11347   | 0.419202  |
| Cdk5r1        | 2.28032   | 2.47518         | 0          | 1         | 1         |
| Gm11419_j3    | 0.125256  | 0.114176        | -0.133628  | 0.760224  | 1         |
| Gm11419_j2    | 0.187211  | 0.0968707       | -0.950529  | 0.034793  | 0.204886  |
| Ccl2          | 2.30454   | 4.69853         | 1.02773    | 4.11E-06  | 0.0001426 |
| Ccl7          | 1.10637   | 3.65059         | 1.72229    | 8.40E-12  | 1.04E-09  |
| Ccl11         | 2.38528   | 3.47357         | 0.542256   | 0.0145181 | 0.11232   |
| Ccl12         | 1.20867   | 3.18284         | 1.39689    | 7.92E-06  | 0.000253  |
| Ccl8          | 1.60233   | 6.70307         | 2.06465    | 6.66E-16  | 1.51E-13  |
| Tmem132e_j1   | 4.5434    | 3.35143         | 0          | 1         | 1         |
| XLOC_004309   | 0.157147  | 0.0406179       | -1.95192   | 0.0935518 | 0.37672   |
| Lig3          | 0.439365  | 0.378879        | -0.21368   | 0.415465  | 0.733308  |
| Lig3_j1       | 0.379125  | 0.260108        | -0.543562  | 0.0597366 | 0.287639  |
| Unc45b_j2     | 0.0512227 | 0 -1.79769e+308 |            | 0.027309  | 1         |
| Unc45b_j5     | 0.416395  | 0.615438        | 0.56366    | 0.0963723 | 0.383357  |
| Unc45b_j7     | 0.324026  | 0.491516        | 0.60113    | 0.254748  | 0.603042  |
| Slfn5_j2      | 0.251114  | 0.130998        | -0.938795  | 0.0669934 | 0.309452  |
| Slfn2         | 1.02811   | 1.56374         | 0.605013   | 0.0076285 | 0.0702299 |
| Ap2b1         | 26.3689   | 21.7333         | -0.278929  | 0.0021313 | 0.0262661 |
| Rasl10b       | 3.23171   | 6.77746         | 0          | 1         | 1         |
| Rasl10b_j7    | 0.733659  | 0               | 0          | 1         | 1         |
| Taf15_j2      | 9.35336   | 10.3533         | 0.14654    | 0.283808  | 0.632215  |
| Gm11428       | 0.739758  | 2.22897         | 1.59125    | 0.0002017 | 0.0038643 |
| Heatr6        | 3.64032   | 3.12316         | 0          | 1         | 1         |

|                  |           |            |               |           |           |
|------------------|-----------|------------|---------------|-----------|-----------|
| Hnf1b_j1         | 0.130704  | 0.00848888 | -3.94459      | 0.0756353 | 1         |
| Ddx52            | 5.04832   | 4.13467    | 0             | 1         | 1         |
| Synrg            | 5.59084   | 6.87146    | 0             | 1         | 1         |
| Acaca_j2         | 0.273342  | 0.343633   | 0.330162      | 1         | 1         |
| Acaca_j3         | 0.540429  | 0.663774   | 0.296586      | 0.541954  | 0.809865  |
| Acaca_j10        | 0.853807  | 0.555823   | -0.619283     | 1         | 1         |
| Acaca_j7         | 0         | 0.352874   | 1.79769e+308  | 0.0091555 | 0.0802424 |
| Acaca_j12        | 1.14112   | 0.950169   | -0.264194     | 0.460721  | 0.762129  |
| Myo19_j4         | 0.6481    | 0.447285   | -0.535022     | 0.196464  | 0.539231  |
| Car4             | 1.89402   | 2.50543    | 0.403605      | 0.0540291 | 0.270863  |
| Ppm1d            | 2.05299   | 1.94811    | -0.0756474    | 0.686146  | 0.883052  |
| Bcas3_j1         | 0.241765  | 0.158732   | 0             | 1         | 1         |
| Tbx2             | 9.75755   | 9.52057    | -0.0354698    | 0.729724  | 0.904457  |
| 4632419I22Rik    | 2.4053    | 2.55154    | 0.0851559     | 0.546456  | 0.81297   |
| Rnft1            | 0.691156  | 0.660994   | 0             | 1         | 1         |
| Tubd1            | 0.0790853 | 0          | -1.79769e+308 | 0.0096082 | 1         |
| Tubd1            | 0.563143  | 0.346719   | -0.699736     | 0.124455  | 0.439692  |
| Tubd1_j6         | 0.350591  | 0.346942   | -0.0150943    | 0.973464  | 0.992363  |
| 1110001A07Rik_j2 | 0.662283  | 0.0012743  | -9.0216       | 0.165248  | 0.501638  |
| Fam33a           | 1.05087   | 2.25525    | 1.1017        | 1.75E-07  | 8.74E-06  |
| 1110001A07Rik_j3 | 0.896484  | 0.306233   | -1.54965      | 0.0006741 | 0.0104123 |
| Trim37           | 25.6729   | 20.5185    | -0.323321     | 0.0002951 | 0.0052727 |
| Tex14_j5         | 0.0758952 | 0          | -1.79769e+308 | 0.0306271 | 1         |
| Tex14_j4         | 0.137671  | 0.0626467  | -1.13591      | 0.389519  | 0.716664  |
| Sept4_j1         | 1.48896   | 0.827792   | -0.846965     | 0.038561  | 0.218671  |
| Sept4_j3         | 18.2922   | 10.9615    | -0.738779     | 2.84E-09  | 2.19E-07  |
| Mttr4            | 3.30375   | 2.37109    | 0             | 1         | 1         |
| Mttr4_j4         | 0.366146  | 0          | 0             | 1         | 1         |
| Mttr4_j3         | 6.68934   | 7.07777    | 0             | 1         | 1         |
| Bzrap1           | 0.149693  | 0.0933307  | -0.681586     | 0.201744  | 0.545317  |
| Bzrap1_j6        | 3.0928    | 2.26046    | -0.452299     | 0.001304  | 0.0176801 |
| Bzrap1_j12       | 0.0492732 | 0          | -1.79769e+308 | 0.009564  | 1         |
| Mks1             | 0.413705  | 0.397445   | -0.0578483    | 0.888275  | 0.964649  |
| Mks1_j7          | 0.236095  | 0.427727   | 0.857325      | 0.103628  | 0.399152  |
| Mks1_j8          | 0.684774  | 0.229865   | -1.57484      | 0.05536   | 0.274792  |
| Srsf1            | 21.6093   | 20.6547    | -0.0651838    | 0.459402  | 0.761406  |
| Vezf1_j2         | 0.170472  | 0          | -1.79769e+308 | 0.0252721 | 0.165544  |
| Vezf1_j1         | 0.139145  | 0.096793   | -0.523617     | 0.674829  | 0.877505  |
| Vezf1            | 7.02031   | 6.66309    | -0.0753444    | 0.491457  | 0.780555  |
| Vezf1_j4         | 0.0807581 | 0          | -1.79769e+308 | 0.0583614 | 1         |
| Cuedc1           | 5.08234   | 4.93528    | -0.042361     | 0.771136  | 0.922274  |
| Mrps23           | 23.8751   | 22.6715    | -0.0746269    | 0.608274  | 0.845626  |
| AK021127_j3      | 0.175126  | 0          | -1.79769e+308 | 0.056531  | 0.278163  |
| AK021127         | 0.553423  | 0.52391    | -0.0790653    | 0.79715   | 0.932581  |
| Coil             | 5.21354   | 7.51205    | 0.526943      | 6.69E-05  | 0.001528  |
| Trim25           | 3.80455   | 4.50353    | 0.243328      | 0.0473149 | 0.249768  |
| Trim25           | 1.76081   | 1.08575    | -0.697548     | 0.000916  | 0.0133291 |

|               |           |                 |            |           |           |
|---------------|-----------|-----------------|------------|-----------|-----------|
| A930013B10Rik | 0.20872   | 0.200775        | -0.055988  | 0.923241  | 0.976086  |
| Gm525_j1      | 0.573206  | 0.318918        | -0.845868  | 0.205406  | 0.549747  |
| Gm525         | 1.32173   | 1.28736         | -0.0380105 | 0.917084  | 0.97399   |
| Tmem100_j1    | 0.583079  | 0.16295         | -1.83926   | 0.0155415 | 0.117743  |
| Tmem100_j3    | 2.5167    | 1.90882         | -0.398848  | 0.126164  | 0.442326  |
| Mmd           | 4.36704   | 4.07955         | -0.0982443 | 0.525094  | 0.800504  |
| Cox11         | 0.737185  | 0.743699        | 0.012692   | 0.947075  | 0.984332  |
| Car10         | 4.37308   | 3.27455         | 0          | 1         | 1         |
| Car10         | 6.5323    | 5.86337         | 0          | 1         | 1         |
| Spag9_j3      | 4.54157   | 2.11829         | -1.10029   | 3.37E-13  | 5.25E-11  |
| B230206L02Rik | 3.31104   | 3.21962         | -0.0403925 | 0.885941  | 0.963781  |
| Tob1_j2       | 0.392252  | 0.34394         | -0.189625  | 0.727508  | 0.903503  |
| Tob1          | 2.27033   | 1.70349         | -0.41441   | 0.104727  | 0.401704  |
| Ankrd40       | 45.0294   | 41.2082         | -0.127934  | 0.14334   | 0.470463  |
| Chad          | 0.353711  | 0.112538        | -1.65216   | 0.0158401 | 0.119411  |
| Lrrc59        | 61.6651   | 64.8054         | 0.0716594  | 0.407106  | 0.727764  |
| Mrpl27_j2     | 0.611235  | 0.468416        | -0.383935  | 0.0794021 | 0.342156  |
| Gm11542_j1    | 0.131328  | 0.0743248       | -0.821261  | 0.266025  | 1         |
| Col1a1        | 6.28881   | 9.46409         | 0.589676   | 1.30E-08  | 8.93E-07  |
| Ppp1r9b       | 23.6449   | 22.4845         | -0.0725975 | 0.427857  | 0.741888  |
| Ppp1r9b_j3    | 0.0856592 | 0 -1.79769e+308 |            | 0.0536768 | 1         |
| Samd14_j3     | 38.8637   | 41.313          | 0.0881731  | 0.404391  | 0.726779  |
| Dlx3_j2       | 0.124905  | 0.187962        | 0.589609   | 0.462042  | 0.763059  |
| Dlx3          | 0.34464   | 0.358126        | 0.0553786  | 0.846242  | 0.951378  |
| Dlx3_j6       | 1.11732   | 1.04678         | -0.0940746 | 0.75949   | 0.91718   |
| Fam117a       | 2.12142   | 1.96435         | -0.110981  | 0.607338  | 0.845305  |
| Fam117a_j1    | 1.13213   | 0.683762        | -0.727469  | 0.0447722 | 0.241767  |
| Slc35b1       | 8.03812   | 9.017           | 0          | 1         | 1         |
| Slc35b1       | 4.20411   | 4.47093         | 0          | 1         | 1         |
| Slc35b1_j3    | 1.02787   | 2.18591         | 0          | 1         | 1         |
| Spop_j5       | 12.5658   | 15.3534         | 0.28905    | 0.0559103 | 0.276454  |
| XLOC_004395   | 0.0892243 | 0.252577        | 1.50121    | 0.155441  | 0.48852   |
| Zfp652_j1     | 0.831276  | 0.784694        | -0.0831965 | 0.73304   | 0.905803  |
| Zfp652_j7     | 26.8196   | 20.7201         | -0.372261  | 0.0002646 | 0.0048282 |
| Ttll6_j8      | 0.120719  | 0.000117748     | -10.0017   | 0.869167  | 1         |
| Hoxb9_j1      | 1.57082   | 0.983005        | -0.676243  | 0.0059762 | 0.0583482 |
| Hoxb9         | 5.93404   | 5.08807         | -0.221897  | 0.11789   | 0.427206  |
| Hoxb8_j1      | 3.20632   | 1.32797         | -1.27169   | 1.43E-06  | 5.63E-05  |
| Hoxb3_j1      | 0.807134  | 0.621928        | -0.376061  | 0.203648  | 0.547888  |
| Hoxb6         | 3.79652   | 2.8452          | -0.416148  | 0.0442988 | 0.24008   |
| Hoxb5_j4      | 0.310355  | 0.603164        | 0.958632   | 0.140477  | 0.466174  |
| Hoxb4         | 0.996765  | 1.2515          | 0.328334   | 0.110146  | 0.412969  |
| Hoxb3_j3      | 0.325543  | 0.253877        | -0.358719  | 0.460001  | 0.76171   |
| Hoxb2         | 1.26054   | 1.13189         | -0.155309  | 0.522538  | 0.798932  |
| Cbx1_j4       | 7.86994   | 9.54353         | 0          | 1         | 1         |
| Copz2         | 3.40382   | 3.75244         | 0.140674   | 0.563834  | 0.822976  |
| Prr15l        | 0.0643876 | 0.051158        | -0.331823  | 0.817021  | 1         |

|               |           |                 |            |           |          |
|---------------|-----------|-----------------|------------|-----------|----------|
| Prr15l        | 0.246692  | 0.41264         | 0.742174   | 0.156655  | 0.490184 |
| Sp6           | 0.41875   | 0.296013        | -0.500429  | 0.194453  | 0.536757 |
| Scrn2         | 1.26223   | 1.39551         | 0.144816   | 0.60668   | 0.845067 |
| Scrn2_j1      | 0.701053  | 0.372071        | -0.913946  | 0.0740471 | 0.328019 |
| Scrn2_j2      | 1.14568   | 0.996576        | -0.20115   | 0.655171  | 0.868251 |
| Mrpl10        | 5.75713   | 4.73247         | 0          | 1         | 1        |
| Osbpl7        | 3.0467    | 2.36183         | 0          | 1         | 1        |
| Mrpl45        | 16.7363   | 16.9375         | 0.0172402  | 0.880568  | 0.961981 |
| Socs7_j1      | 3.81441   | 3.22553         | 0          | 1         | 1        |
| Socs7_j3      | 2.44528   | 1.61513         | 0          | 1         | 1        |
| Arhgap23_j6   | 3.37065   | 4.02586         | 0          | 1         | 1        |
| Mllt6_j1      | 0.386836  | 0.0404005       | 0          | 1         | 1        |
| Mllt6         | 3.85358   | 2.66385         | 0          | 1         | 1        |
| Mllt6_j6      | 1.07632   | 1.79304         | 0          | 1         | 1        |
| Cisd3         | 5.57358   | 4.65424         | 0          | 1         | 1        |
| Cisd3         | 9.28835   | 16.1552         | 0          | 1         | 1        |
| Cisd3         | 25.3556   | 26.5938         | 0          | 1         | 1        |
| Psemb3_j2     | 16.9676   | 20.9607         | 0.3049     | 0.0445431 | 0.240823 |
| Lasp1         | 7.64249   | 7.26057         | 0          | 1         | 1        |
| Lasp1_j1      | 0.189588  | 0.286855        | 0          | 1         | 1        |
| B230217C12Rik | 0.0542257 | 0.0163713       | -1.7278    | 0.222488  | 1        |
| Cdk12         | 0.895139  | 0.440921        | 0          | 1         | 1        |
| Ppp1r1b       | 4.14168   | 4.66047         | 0.170261   | 0.284266  | 0.632886 |
| Stard3_j1     | 0.270567  | 0.154413        | -0.809194  | 0.397365  | 0.721699 |
| Stard3        | 9.57662   | 10.3749         | 0.11551    | 0.39249   | 0.718739 |
| Stard3_j3     | 1.21041   | 1.05192         | -0.202478  | 0.612306  | 0.847331 |
| Erbp2         | 2.00701   | 1.96869         | 0          | 1         | 1        |
| Psmc3         | 66.6184   | 73.4614         | 0.141064   | 0.102575  | 0.396835 |
| Thra_j5       | 0.137424  | 0 -1.79769e+308 | 0.0213462  | 0.147293  |          |
| Thra          | 65.7558   | 61.7325         | -0.0910874 | 0.320812  | 0.664012 |
| Msl1          | 8.41428   | 8.26456         | 0          | 1         | 1        |
| Msl1          | 10.8623   | 12.0791         | 0          | 1         | 1        |
| Casc3         | 7.02009   | 6.23755         | 0          | 1         | 1        |
| Casc3_j1      | 6.60288   | 7.59509         | 0          | 1         | 1        |
| Rapgef1       | 0.386643  | 0.437225        | 0.177376   | 0.511082  | 0.791373 |
| Wipf2         | 0.469536  | 0.243715        | 0          | 1         | 1        |
| Rara_j1       | 0.225912  | 0.135972        | 0          | 1         | 1        |
| Rara          | 0.456565  | 0.581934        | 0          | 1         | 1        |
| Rara          | 0.743351  | 0.909148        | 0          | 1         | 1        |
| Rara          | 0.421081  | 0               | 0          | 1         | 1        |
| Igfbp4_j1     | 0.68604   | 0.863618        | 0          | 1         | 1        |
| Gm11560       | 14.1682   | 19.0171         | 0.424648   | 0.00075   | 0.011381 |
| Gm11598       | 18.572    | 21.856          | 0.234905   | 0.140185  | 0.465682 |
| Eif1_j2       | 22.9758   | 22.0343         | 0          | 1         | 1        |
| Fkbp10        | 3.92074   | 4.15626         | 0.0841579  | 0.554724  | 0.817714 |
| Ttc25         | 0.0605475 | 0.0275013       | -1.13856   | 0.411494  | 1        |
| Cnp           | 1.41389   | 1.35347         | -0.0630114 | 0.758717  | 0.917041 |



|             |           |                 |            |           |           |
|-------------|-----------|-----------------|------------|-----------|-----------|
| Nkiras2     | 14.8806   | 17.0904         | 0.199757   | 0.0655996 | 0.30534   |
| Atp6v0a1_j5 | 0.0554906 | 0.0935998       | 0          | 1         | 1         |
| Naglu       | 2.67839   | 2.86883         | 0.0990949  | 0.571443  | 0.826851  |
| Hsd17b1_j3  | 0.190988  | 0.0199971       | -3.25562   | 0.0920678 | 0.373273  |
| Coasy_j2    | 1.47304   | 2.04536         | 0          | 1         | 1         |
| Tubg2_j1    | 6.09845   | 4.09459         | -0.574724  | 0.0062313 | 0.0603186 |
| Tubg2       | 20.4884   | 18.5692         | -0.141892  | 0.218793  | 0.565038  |
| Cntnap1     | 2.24396   | 2.11053         | 0          | 1         | 1         |
| Cntnap1_j2  | 9.50771   | 5.41044         | 0          | 1         | 1         |
| Ramp2       | 0.256916  | 0.220944        | -0.217619  | 0.786528  | 0.928645  |
| Vps25_j1    | 15.3497   | 16.0673         | 0.0659117  | 0.587508  | 0.835056  |
| Vps25_j4    | 0.362509  | 0.644597        | 0.830379   | 0.318275  | 0.661707  |
| Psme3_j6    | 32.7715   | 33.4444         | 0.0293231  | 0.755117  | 0.915526  |
| Aoc3_j1     | 0.116661  | 0 -1.79769e+308 |            | 0.0007052 | 1         |
| Rundc1      | 2.275     | 2.45622         | 0          | 1         | 1         |
| Rundc1_j1   | 1.17243   | 0.908656        | 0          | 1         | 1         |
| Rpl27_j2    | 0.444072  | 0.686482        | 0.628428   | 0.0921532 | 0.373526  |
| Ifi35       | 0.469477  | 0.504882        | 0          | 1         | 1         |
| Ifi35_j2    | 1.61092   | 2.56473         | 0          | 1         | 1         |
| Nbr1_j1     | 0.11393   | 0.266121        | 0          | 1         | 1         |
| Nbr1        | 16.0989   | 16.6018         | 0          | 1         | 1         |
| Tmem106a    | 0.464521  | 0.474333        | 0          | 1         | 1         |
| Tmem106a_j2 | 1.01452   | 1.37007         | 0          | 1         | 1         |
| Tmem106a    | 1.80594   | 1.75733         | 0          | 1         | 1         |
| Rdm1        | 0.996465  | 1.316           | 0.401272   | 0.160601  | 0.495311  |
| Rdm1_j6     | 0.82397   | 0.955985        | 0.214396   | 0.704138  | 0.891718  |
| Arl4d       | 8.01867   | 7.3132          | -0.132859  | 0.354014  | 0.690168  |
| Dhx8        | 2.04184   | 1.72618         | -0.242292  | 0.146206  | 0.474483  |
| Cd300lg     | 0.807718  | 0.784548        | -0.0419903 | 0.89257   | 0.966031  |
| Gm11585     | 7.82312   | 8.49133         | 0.118247   | 0.533494  | 0.805159  |
| G6pc3_j1    | 0.635232  | 0.583872        | -0.121632  | 0.8222    | 0.942621  |
| BC030867_j2 | 0.527386  | 0.457685        | -0.204502  | 0.699946  | 0.889482  |
| BC030867_j4 | 0.378624  | 0.167384        | -1.1776    | 0.170961  | 0.507955  |
| Rundc3a_j3  | 6.35235   | 7.35013         | 0          | 1         | 1         |
| Rundc3a_j9  | 0.379278  | 0.257844        | 0          | 1         | 1         |
| Grn         | 29.4351   | 37.128          | 0.334969   | 0.0003224 | 0.0056811 |
| Fzd2        | 1.53449   | 1.73194         | 0.174634   | 0.294771  | 0.641359  |
| Gm16342_j2  | 0.0685126 | 0.117735        | 0.781108   | 0.528755  | 1         |
| Adam11      | 24.0866   | 19.1447         | 0          | 1         | 1         |
| Adam11_j7   | 12.6468   | 8.9076          | 0          | 1         | 1         |
| Nmt1_j1     | 22.8678   | 19.7564         | 0          | 1         | 1         |
| Acbd4_j6    | 12.7973   | 11.574          | 0          | 1         | 1         |
| Hexim1      | 5.42148   | 5.20548         | -0.0586571 | 0.608919  | 0.84604   |
| Hexim2      | 0.678029  | 0.255699        | -1.4069    | 0.0107798 | 0.0904737 |
| Hexim2      | 0.243056  | 0.428581        | 0.818278   | 0.14196   | 0.46851   |
| Hexim2_j5   | 0.39735   | 0 -1.79769e+308 |            | 8.09E-07  | 3.46E-05  |
| Fmnl1_j5    | 4.49097   | 3.57881         | -0.327545  | 0.050897  | 0.2614    |

|                  |           |                 |              |           |           |
|------------------|-----------|-----------------|--------------|-----------|-----------|
| Fmnl1_j8         | 4.10991   | 4.55214         | 0.147438     | 0.393218  | 0.719154  |
| Fmnl1_j11        | 10.9874   | 11.8775         | 0.112378     | 0.452853  | 0.757797  |
| Arf2             | 7.41242   | 8.07422         | 0.123379     | 0.324648  | 0.667642  |
| Arf2_j1          | 0.305554  | 0 -1.79769e+308 |              | 2.11E-05  | 0.0005803 |
| Crhr1            | 0.41904   | 0.181832        | -1.20448     | 0.030142  | 0.186295  |
| Mapt_j1          | 37.3502   | 37.069          | -0.0109008   | 0.900415  | 0.968327  |
| Itgb3            | 1.31799   | 1.35319         | 0            | 1         | 1         |
| Itgb3_j1         | 1.31799   | 1.39174         | 0            | 1         | 1         |
| Mettl2_j1        | 2.18931   | 1.36459         | -0.682011    | 0.0300845 | 0.186072  |
| Mettl2_j6        | 0.974866  | 0.664346        | -0.55327     | 0.187211  | 0.528204  |
| Tlk2_j3          | 0         | 0.192982        | 1.79769e+308 | 0.0028992 | 0.0335111 |
| Tlk2_j5          | 0.202123  | 0.256822        | 0.345535     | 0.610616  | 0.846532  |
| Mrc2_j2          | 0.110793  | 0.0148381       | -2.90049     | 1         | 1         |
| Mrc2_j5          | 0.190653  | 0.0727296       | -1.39034     | 0.0799018 | 0.3436    |
| AK039104_j2      | 0.140306  | 0.041731        | -1.74939     | 0.24362   | 0.59085   |
| Ace_j3           | 0.336547  | 0.227693        | -0.563721    | 0.153834  | 0.48666   |
| Ace              | 0.0162818 | 0.341076        | 4.38876      | 4.80E-05  | 0.0011531 |
| Kcnh6            | 6.83787   | 6.57012         | -0.0576281   | 0.61716   | 0.849331  |
| Kcnh6_j1         | 0.191909  | 0.208678        | 0.120859     | 0.759629  | 0.91718   |
| Dcaf7            | 21.1982   | 20.2919         | -0.0630412   | 0.478744  | 0.773322  |
| Taco1            | 4.56781   | 4.92408         | 0.10835      | 0.450699  | 0.756228  |
| Map3k3           | 0.647661  | 0.435375        | 0            | 1         | 1         |
| Ddx42            | 8.7833    | 8.05106         | 0            | 1         | 1         |
| Psmc5_j1         | 38.9112   | 51.8798         | 0            | 1         | 1         |
| 1810010H24Rik_j1 | 0.43433   | 0.506872        | 0.222833     | 0.584375  | 0.833436  |
| Psmc12           | 49.006    | 45.4894         | -0.107426    | 0.262255  | 0.611336  |
| Helz             | 0.37776   | 0               | 0            | 1         | 1         |
| Helz_j6          | 0.0567115 | 0               | 0            | 1         | 1         |
| Ccdc46_j3        | 0.0992155 | 0 -1.79769e+308 |              | 0.0006894 | 1         |
| Ccdc46_j2        | 0.153121  | 0 -1.79769e+308 |              | 2.26E-05  | 0.0006107 |
| Ccdc46_j4        | 0.251751  | 0.0809647       | -1.63663     | 0.018881  | 0.135521  |
| XLOC_004524      | 0.143341  | 0.0665176       | -1.10765     | 0.314803  | 0.658969  |
| Axin2            | 1.15448   | 0.525454        | 0            | 1         | 1         |
| Gna13            | 9.27797   | 7.70485         | 0            | 1         | 1         |
| Amz2_j1          | 1.8439    | 0.777376        | -1.24607     | 0.0250948 | 0.164737  |
| Amz2             | 14.9363   | 15.1451         | 0.0200342    | 0.848487  | 0.952104  |
| Arsg             | 0.0985857 | 0.0334091       | 0            | 1         | 1         |
| Arsg_j5          | 0.0798686 | 0.037208        | 0            | 1         | 1         |
| Prkar1a          | 221.577   | 223.527         | 0.0126443    | 0.88845   | 0.964658  |
| Map2k6           | 0.483834  | 0.26717         | -0.856757    | 0.0165092 | 0.123122  |
| XLOC_004530      | 0.263324  | 0.151218        | -0.800211    | 0.226199  | 0.573417  |
| Kcnj16           | 0.280853  | 0.354832        | 0.337321     | 0.395898  | 0.72089   |
| Kcnj16_j2        | 0.594608  | 0.041195        | -3.8514      | 0.0002291 | 0.0042901 |
| Kcnj2            | 0.422355  | 0.244428        | -0.789045    | 0.0311489 | 0.190303  |
| Gm11675          | 8.57052   | 10.6221         | 0.309614     | 0.0366905 | 0.211804  |
| Sox9_j1          | 0.0334742 | 0.18597         | 2.47395      | 0.0265098 | 0.171144  |
| Sox9             | 0.42903   | 0.982878        | 1.19593      | 6.36E-08  | 3.65E-06  |

|                  |           |                 |            |           |           |
|------------------|-----------|-----------------|------------|-----------|-----------|
| Sstr2_j1         | 2.47508   | 2.19104         | -0.175861  | 0.342417  | 0.68221   |
| Cog1_j1          | 5.16272   | 4.39072         | 0          | 1         | 1         |
| Cog1_j2          | 1.30548   | 1.28622         | 0          | 1         | 1         |
| XLOC_004539      | 0.13027   | 0.124228        | -0.0685165 | 0.911515  | 1         |
| Rpl38            | 0.39744   | 1.07555         | 1.43627    | 0.0022049 | 0.0269555 |
| Ttyh2            | 2.98227   | 3.23627         | 0          | 1         | 1         |
| Ttyh2_j2         | 0.0647085 | 0.0132393       | 0          | 1         | 1         |
| Kif19a           | 1.33301   | 0.833006        | 0          | 1         | 1         |
| Kif19a_j5        | 1.6492    | 1.80309         | 0          | 1         | 1         |
| Gprc5c           | 2.01405   | 1.29783         | 0          | 1         | 1         |
| Gprc5c_j4        | 1.46862   | 0.181279        | 0          | 1         | 1         |
| Gprc5c           | 3.02813   | 3.14428         | 0          | 1         | 1         |
| XLOC_004546      | 0.144358  | 0.0771877       | 0          | 1         | 1         |
| Cd300a_j2        | 0.146464  | 0.0211158       | 0          | 1         | 1         |
| Cd300a           | 0.128263  | 0.145832        | 0          | 1         | 1         |
| Rab37_j1         | 7.00969   | 4.55951         | 0          | 1         | 1         |
| Rab37_j2         | 8.5197    | 7.26013         | 0          | 1         | 1         |
| Tmem104          | 12.2184   | 12.3079         | 0.0105309  | 0.913351  | 0.972756  |
| Cdr2l            | 4.31084   | 3.11962         | -0.466599  | 0.0007285 | 0.0110828 |
| Ict1             | 18.0443   | 18.4727         | 0.0338563  | 0.811365  | 0.938053  |
| Ict1             | 6.63778   | 5.95394         | -0.156855  | 0.543811  | 0.811058  |
| Kctd2            | 5.23605   | 4.88867         | -0.0990352 | 0.335554  | 0.676258  |
| Armc7            | 2.09389   | 1.99513         | -0.0697031 | 0.686246  | 0.883069  |
| Nup85            | 9.2856    | 9.82516         | 0          | 1         | 1         |
| 2310067B10Rik    | 0.478137  | 0.140126        | 0          | 1         | 1         |
| 2310067B10Rik_j1 | 0.278368  | 0               | 0          | 1         | 1         |
| 2310067B10Rik_j3 | 5.10138   | 3.29984         | 0          | 1         | 1         |
| Tsen54           | 4.62032   | 4.08364         | -0.178137  | 0.243549  | 0.59077   |
| Llg12_j5         | 0.154936  | 0 -1.79769e+308 | 0.0138139  | 0.0138139 | 0.1085    |
| 2210020M01Rik    | 1.71753   | 1.64364         | -0.0634405 | 0.745419  | 0.91128   |
| 2210020M01Rik    | 0.548991  | 0.415684        | -0.401293  | 0.294724  | 0.641359  |
| Sap30bp          | 8.60948   | 9.81472         | 0.18902    | 0.073029  | 0.325396  |
| Itgb4            | 0.34701   | 0.496558        | 0.516986   | 0.107754  | 0.407985  |
| Itgb4_j3         | 1.08359   | 1.20958         | 0.158688   | 0.434005  | 0.745221  |
| Itgb4_j8         | 2.88596   | 4.43088         | 0.618545   | 0.0010555 | 0.0148995 |
| Unk_j2           | 0.438749  | 0.650027        | 0          | 1         | 1         |
| Unk              | 0.15222   | 0.122308        | 0          | 1         | 1         |
| Cdk3_j1          | 7.10272   | 7.84063         | 0          | 1         | 1         |
| Sphk1            | 0.252063  | 0.33926         | 0.428606   | 0.195688  | 0.538253  |
| Aanat_j1         | 0.237067  | 0.171952        | -0.463293  | 0.500496  | 0.785042  |
| 1810032O08Rik    | 0.558953  | 0.45691         | -0.290816  | 0.577709  | 0.829916  |
| 1810032O08Rik    | 0.931969  | 0.906001        | -0.0407696 | 0.929707  | 0.978418  |
| 1110005A03Rik_j1 | 0.208007  | 0.0832736       | -1.3207    | 0.0417367 | 0.230484  |
| Mfsd11_j4        | 18.2156   | 19.9376         | 0.130315   | 0.21675   | 0.562923  |
| Mgat5b_j6        | 0.386402  | 0.562324        | 0.541298   | 0.278477  | 0.627428  |
| 2810008D09Rik    | 12.2382   | 12.288          | 0.00585737 | 0.97197   | 0.991962  |
| Sec14l1          | 11.5488   | 11.1245         | -0.0540125 | 0.599282  | 0.841178  |

|                  |           |            |               |           |           |
|------------------|-----------|------------|---------------|-----------|-----------|
| Sec14l1_j1       | 0.0898713 | 0          | -1.79769e+308 | 0.0125049 | 1         |
| Sept9            | 5.4146    | 5.50679    | 0             | 1         | 1         |
| Gm11734_j1       | 0.100389  | 0.0478703  | -1.0684       | 0.239014  | 1         |
| Gm11734_j4       | 0.030223  | 0.0747742  | 1.30689       | 1         | 1         |
| 2900041M22Rik    | 2.23293   | 1.83077    | -0.286485     | 0.170721  | 0.507662  |
| Tmc8_j5          | 0.0943025 | 0          | -1.79769e+308 | 0.0017482 | 1         |
| Tmc8_j4          | 0.115727  | 0.0831836  | -0.476359     | 0.562266  | 1         |
| Tmc8_j7          | 0.0895245 | 0.184526   | 1.04347       | 0.191376  | 0.53353   |
| Tmc8_j10         | 0.128864  | 0          | -1.79769e+308 | 0.0391788 | 1         |
| Syngn2           | 5.8157    | 6.94426    | 0.255869      | 0.0933313 | 0.376049  |
| Afmid_j3         | 0.0968642 | 0          | -1.79769e+308 | 0.0056634 | 1         |
| Birc5            | 1.16292   | 1.4051     | 0.272913      | 0.230018  | 0.577072  |
| Pgs1_j3          | 13.0339   | 10.6914    | 0             | 1         | 1         |
| Pgs1_j5          | 3.2929    | 2.66748    | 0             | 1         | 1         |
| Pgs1_j8          | 27.5618   | 34.2081    | 0             | 1         | 1         |
| C1qtnf1          | 6.40373   | 5.57203    | 0             | 1         | 1         |
| Engase_j3        | 0.361132  | 0.315439   | -0.195167     | 0.742362  | 0.909901  |
| Engase_j4        | 0.122092  | 0          | -1.79769e+308 | 0.0085791 | 1         |
| Engase           | 0.149141  | 0.318528   | 1.09474       | 0.136431  | 0.459412  |
| Cbx2_j1          | 0.13827   | 0          | -1.79769e+308 | 0.0001661 | 0.0032888 |
| Cbx2             | 0.763889  | 0.965241   | 0.337526      | 0.192262  | 0.534507  |
| Ccdc40_j2        | 3.24953   | 4.98811    | 0.618261      | 0.0006165 | 0.0097101 |
| Gaa              | 98.9187   | 85.8529    | -0.204377     | 0.0171841 | 0.12672   |
| Card14_j2        | 0.345705  | 0.219163   | -0.657537     | 0.0811059 | 0.346776  |
| Slc26a11_j3      | 0.752487  | 0.847918   | 0             | 1         | 1         |
| Slc26a11         | 1.0345    | 0.88318    | 0             | 1         | 1         |
| Slc26a11_j2      | 0.361863  | 0.659843   | 0             | 1         | 1         |
| XLOC_004601      | 0.105723  | 0.00935661 | 0             | 1         | 1         |
| Rnf213_j6        | 0.880276  | 1.02372    | 0             | 1         | 1         |
| A730011L01Rik    | 0.632812  | 0.466696   | 0             | 1         | 1         |
| A730011L01Rik_j2 | 0.690656  | 0.575036   | 0             | 1         | 1         |
| Gm11762_j3       | 0.100908  | 0.0913923  | -0.142894     | 0.821382  | 1         |
| Rptor            | 5.171     | 4.30584    | 0             | 1         | 1         |
| Rptor_j2         | 4.30104   | 4.37089    | 0             | 1         | 1         |
| Chmp6_j1         | 11.2287   | 11.7095    | 0.0604891     | 0.564259  | 0.823154  |
| Baiap2           | 2.46162   | 2.62233    | 0.0912392     | 0.602782  | 0.843178  |
| Baiap2           | 0.744643  | 0.698942   | -0.0913758    | 0.819145  | 0.94142   |
| Baiap2           | 2.03291   | 2.43578    | 0.260836      | 0.234866  | 0.582077  |
| 1810043H04Rik    | 3.53258   | 3.21733    | 0             | 1         | 1         |
| Bahcc1_j2        | 0.0690658 | 0.0262489  | -1.39572      | 0.0814776 | 1         |
| Hgs_j6           | 0.189984  | 0.220193   | 0.212894      | 0.598697  | 0.84094   |
| Mrpl12           | 14.404    | 15.3399    | 0.0908217     | 0.518996  | 0.796737  |
| Mrpl12_j1        | 2.21815   | 1.75411    | -0.338623     | 0.506667  | 0.789088  |
| Slc25a10         | 10.5057   | 9.33657    | -0.170208     | 0.17047   | 0.507473  |
| Anapc11_j1       | 2.31086   | 2.1769     | -0.0861503    | 0.617482  | 0.84948   |
| Anapc11_j3       | 0.0946427 | 0.0685     | -0.466387     | 0.602667  | 1         |
| Lrrc45_j2        | 1.23377   | 0.112771   | 0             | 1         | 1         |

|            |           |                 |            |           |           |
|------------|-----------|-----------------|------------|-----------|-----------|
| Rac3       | 33.9764   | 46.8922         | 0.464816   | 5.82E-05  | 0.0013554 |
| Hexdc_j1   | 0.0790174 | 0.0147796       | 0          | 1         | 1         |
| Narf       | 5.96259   | 5.75049         | -0.0522541 | 0.606409  | 0.845025  |
| Foxk2      | 0.969954  | 0               | 0          | 1         | 1         |
| Fn3krp     | 7.56506   | 6.80908         | -0.151893  | 0.229754  | 0.57683   |
| Tbcd_j1    | 0.400992  | 0.171221        | 0          | 1         | 1         |
| Metrn1     | 2.6112    | 6.12736         | 1.23055    | 1.47E-09  | 1.20E-07  |
| Drg1       | 3.57644   | 3.89697         | 0          | 1         | 1         |
| Limk2_j1   | 1.36309   | 1.50396         | 0          | 1         | 1         |
| Rnf185_j2  | 2.20003   | 3.20104         | 0          | 1         | 1         |
| Rnf185     | 6.76413   | 6.86422         | 0          | 1         | 1         |
| Smtn_j3    | 0.080773  | 0 -1.79769e+308 |            | 0.0037004 | 1         |
| Smtn_j1    | 2.0654    | 2.64745         | 0.35818    | 0.0091075 | 0.0799533 |
| Tug1       | 7.11486   | 6.93343         | -0.037266  | 0.699228  | 0.889208  |
| Osbp2      | 0.300123  | 0               | 0          | 1         | 1         |
| Slc35e4    | 6.61413   | 9.24337         | 0.482868   | 3.14E-05  | 0.0008057 |
| Tcn2_j1    | 0.436544  | 0.00228737      | -7.5763    | 0.324526  | 0.667503  |
| Tcn2       | 12.9336   | 12.3204         | -0.0700782 | 0.553768  | 0.817269  |
| Mtfp1_j2   | 5.94666   | 4.37171         | -0.44388   | 0.0176423 | 0.129064  |
| Mtfp1      | 1.37742   | 1.1321          | -0.282974  | 0.286492  | 0.635373  |
| Ccdc157_j1 | 0.0737165 | 0.0435114       | -0.760592  | 0.194194  | 1         |
| Hormad2_j1 | 0.57671   | 0.522544        | -0.142295  | 0.707743  | 0.893519  |
| Mtmr3_j5   | 10.2882   | 8.35247         | 0          | 1         | 1         |
| Mtmr3_j6   | 0.115208  | 0               | 0          | 1         | 1         |
| Mtmr3      | 5.14703   | 4.56764         | 0          | 1         | 1         |
| Uqcr10_j3  | 0.110876  | 0.205755        | 0.891975   | 0.326535  | 0.669766  |
| Cabp7      | 10.3519   | 6.38191         | -0.697841  | 4.17E-08  | 2.50E-06  |
| Nf2_j3     | 6.99935   | 7.04701         | 0          | 1         | 1         |
| Nf2        | 6.35947   | 6.5828          | 0          | 1         | 1         |
| Nefh       | 2.00274   | 0.578944        | 0          | 1         | 1         |
| Gas2l1     | 0.243342  | 0.320843        | 0          | 1         | 1         |
| Gas2l1_j7  | 1.53832   | 1.12785         | 0          | 1         | 1         |
| Ewsr1_j1   | 3.87904   | 3.30815         | 0          | 1         | 1         |
| Emid1_j3   | 0.526042  | 0.862969        | 0.71413    | 0.0672863 | 0.310169  |
| Emid1      | 1.66454   | 1.67037         | 0.00504496 | 0.983681  | 0.995196  |
| Kremen1    | 2.71558   | 2.82549         | 0.0572412  | 0.698227  | 0.888784  |
| Ccdc117    | 0.813596  | 0.905913        | 0.155059   | 0.476105  | 0.771923  |
| Mrps24     | 26.7905   | 27.6618         | 0          | 1         | 1         |
| Polm_j3    | 0.300796  | 0.169703        | -0.825772  | 0.145809  | 0.47377   |
| Polm_j1    | 0.0628421 | 0 -1.79769e+308 |            | 0.0113444 | 1         |
| Polm_j2    | 0.105212  | 0 -1.79769e+308 |            | 0.0017891 | 1         |
| Pold2      | 4.55586   | 4.77175         | 0.0667954  | 0.600275  | 0.841633  |
| Gck_j1     | 0.364539  | 0.177663        | -1.03693   | 0.169116  | 0.505835  |
| Camk2b_j9  | 5.27213   | 3.49056         | 0          | 1         | 1         |
| Camk2b     | 2.10862   | 1.5477          | 0          | 1         | 1         |
| Camk2b_j8  | 2.05864   | 1.01889         | 0          | 1         | 1         |
| Nudcd3     | 4.53525   | 3.83363         | 0          | 1         | 1         |

|                  |           |                 |            |           |           |
|------------------|-----------|-----------------|------------|-----------|-----------|
| Ddx56            | 18.8538   | 19.5591         | 0.0529825  | 0.607042  | 0.845207  |
| Tmed4            | 22.1871   | 21.8855         | -0.0197461 | 0.83715   | 0.947892  |
| H2afv            | 6.17713   | 6.07842         | -0.0232403 | 0.881836  | 0.962574  |
| Myo1g_j5         | 0.0502335 | 0.0484123       | -0.0532756 | 0.96967   | 1         |
| AK160548_j2      | 0.564353  | 0.607479        | 0.106236   | 0.828283  | 0.944579  |
| AK160548_j1      | 1.07989   | 1.22893         | 0.186527   | 0.649317  | 0.865253  |
| Nacad            | 0.20511   | 0.101471        | 0          | 1         | 1         |
| Tbrg4            | 9.67522   | 7.41599         | 0          | 1         | 1         |
| Tbrg4_j4         | 2.30375   | 0.861317        | 0          | 1         | 1         |
| Gm11977          | 2.5246    | 2.24524         | -0.169183  | 0.391485  | 0.71795   |
| Igfbp3           | 9.12065   | 16.3892         | 0.845538   | 3.33E-15  | 6.71E-13  |
| Tns3_j4          | 0.529137  | 0.685122        | 0          | 1         | 1         |
| Tns3             | 7.67921   | 7.38636         | 0          | 1         | 1         |
| Hus1_j2          | 0.742312  | 0.530061        | 0          | 1         | 1         |
| Hus1             | 0.523791  | 0.312425        | 0          | 1         | 1         |
| Hus1_j6          | 0.451387  | 0.419661        | 0          | 1         | 1         |
| Zpbp_j5          | 0.166771  | 0.046883        | -1.83073   | 0.0524962 | 0.266162  |
| Zpbp_j4          | 0.019829  | 0.0482027       | 1.2815     | 0.362449  | 1         |
| Zpbp_j7          | 0.149693  | 0.173185        | 0.210307   | 0.752803  | 0.914568  |
| Figl1_j1         | 0.129911  | 0.187881        | 0.532289   | 0.402979  | 0.726051  |
| Figl1            | 0.0594125 | 0 -1.79769e+308 |            | 0.0219522 | 1         |
| Figl1            | 0.11423   | 0.000127442     | -9.80789   | 0.882239  | 1         |
| Grb10_j8         | 0.336891  | 0.223919        | 0          | 1         | 1         |
| Grb10_j4         | 1.58541   | 2.49069         | 0          | 1         | 1         |
| Grb10            | 2.02718   | 2.95862         | 0          | 1         | 1         |
| Cobl_j6          | 0.474139  | 1.19629         | 0          | 1         | 1         |
| Cobl_j8          | 0.521323  | 0.287428        | 0          | 1         | 1         |
| Gm12663          | 34.6719   | 27.7476         | -0.321404  | 0.0027908 | 0.0325105 |
| Pno1             | 16.8998   | 18.3637         | 0.11985    | 0.274628  | 0.623754  |
| Etaa1            | 1.14554   | 0.718904        | 0          | 1         | 1         |
| Meis1_j4         | 0.148456  | 0.115487        | -0.362304  | 0.696616  | 0.88816   |
| Meis1            | 0.648859  | 0.697352        | 0.103982   | 0.707376  | 0.893299  |
| XLOC_004705      | 0.115221  | 0.106557        | -0.112784  | 0.894074  | 1         |
| Actr2_j1         | 51.4703   | 37.3604         | 0          | 1         | 1         |
| Cep68            | 1.00341   | 0.867809        | -0.209467  | 0.256918  | 0.60573   |
| Slc1a4_j2        | 11.2976   | 17.8717         | 0          | 1         | 1         |
| Slc1a4           | 12.7737   | 16.0302         | 0          | 1         | 1         |
| Aftph_j4         | 11.9554   | 11.5367         | -0.0514328 | 0.624486  | 0.853373  |
| 1110067D22Rik_j4 | 2.39454   | 2.58855         | 0          | 1         | 1         |
| 1110067D22Rik_j3 | 0.14497   | 0               | 0          | 1         | 1         |
| Ugp2             | 3.73039   | 2.97681         | 0          | 1         | 1         |
| Ugp2             | 4.3209    | 4.60759         | 0          | 1         | 1         |
| Ugp2_j1          | 43.8925   | 38.2486         | 0          | 1         | 1         |
| Mdh1_j1          | 40.9006   | 24.0176         | 0          | 1         | 1         |
| Mdh1             | 195.799   | 156.158         | 0          | 1         | 1         |
| Ehbp1_j3         | 0.163021  | 0               | 0          | 1         | 1         |
| Ehbp1_j2         | 1.61469   | 1.59517         | 0          | 1         | 1         |

|               |           |                 |             |           |           |
|---------------|-----------|-----------------|-------------|-----------|-----------|
| Ehbp1_j1      | 1.11799   | 0.623036        | 0           | 1         | 1         |
| Ehbp1_j15     | 1.64186   | 0.724524        | 0           | 1         | 1         |
| XLOC_004718   | 0.208522  | 0.0431126       | -2.27402    | 0.265194  | 0.614018  |
| XLOC_004718   | 0.102299  | 0.0491589       | -1.05727    | 0.432508  | 1         |
| B3gnt2_j1     | 1.9847    | 0.737831        | 0           | 1         | 1         |
| Ahsa2         | 22.2853   | 23.8849         | 0.100008    | 0.298067  | 0.644674  |
| mKIAA1841_j2  | 10.2749   | 11.5982         | 0           | 1         | 1         |
| 0610010F05Rik | 15.335    | 14.0223         | 0           | 1         | 1         |
| Pex13_j1      | 1.15145   | 1.25694         | 0           | 1         | 1         |
| Pex13         | 3.39829   | 2.38107         | 0           | 1         | 1         |
| Rel_j1        | 0.674027  | 0.669592        | -0.00952583 | 0.960641  | 0.988891  |
| Papolg        | 2.72487   | 2.58508         | -0.0759791  | 0.605035  | 0.844161  |
| Vrk2          | 0.892435  | 0.937172        | 0.0705676   | 0.787308  | 0.929063  |
| Ccdc85a       | 6.51024   | 5.90282         | 0           | 1         | 1         |
| Ccdc104       | 16.1811   | 16.8666         | 0.0598634   | 0.501716  | 0.785736  |
| Prorsd1_j2    | 0.255579  | 0.13811         | -0.887956   | 0.0627245 | 0.296633  |
| Prorsd1       | 0.514987  | 0.546747        | 0.086337    | 0.725551  | 0.902457  |
| Eml6_j2       | 0.309163  | 0.208387        | 0           | 1         | 1         |
| Spnb2_j5      | 83.2677   | 87.3948         | 0.0697909   | 0.44237   | 0.750549  |
| Spnb2_j3      | 18.4272   | 13.6593         | -0.431954   | 3.24E-06  | 0.0001162 |
| Acyp2_j1      | 1.583     | 2.48457         | 0.650332    | 0.0980425 | 0.387     |
| Acyp2_j4      | 0.497468  | 0.363758        | -0.451626   | 0.539926  | 0.808719  |
| Erlec1_j2     | 2.39799   | 2.86212         | 0           | 1         | 1         |
| Erlec1_j3     | 0.670497  | 0.616096        | 0           | 1         | 1         |
| Erlec1        | 5.96676   | 5.29287         | 0           | 1         | 1         |
| Chac2         | 2.88412   | 2.67052         | -0.11101    | 0.697792  | 0.888634  |
| Chac2         | 12.7389   | 14.0346         | 0.139746    | 0.298274  | 0.644912  |
| Bod1          | 21.9491   | 25.0811         | 0.192442    | 0.0581616 | 0.283189  |
| XLOC_004745   | 0.0572288 | 0 -1.79769e+308 | 0.0549655   |           | 1         |
| Rhbdf1_j3     | 1.98086   | 2.13452         | 0           | 1         | 1         |
| Rhbdf1        | 1.67282   | 1.36642         | 0           | 1         | 1         |
| Rhbdf1_j4     | 2.95767   | 3.71388         | 0           | 1         | 1         |
| Nprl3         | 0.342575  | 0.359513        | 0.0696235   | 0.807861  | 0.936731  |
| Nprl3         | 0.703993  | 0.686101        | -0.0371388  | 0.859971  | 0.955708  |
| Nprl3_j1      | 10.1442   | 10.5287         | 0.0536771   | 0.696402  | 0.888071  |
| Efcab9_j2     | 0.0710812 | 0 -1.79769e+308 | 0.0629191   |           | 1         |
| Efcab9_j3     | 0.0958693 | 0.0588571       | -0.703853   | 0.588038  | 1         |
| XLOC_004748   | 0.192378  | 0.168289        | -0.193007   | 0.683778  | 0.881734  |
| Fgf18_j4      | 5.64966   | 5.97585         | 0.0809792   | 0.661968  | 0.871832  |
| Fgf18         | 3.02269   | 2.0434          | -0.56486    | 0.0177099 | 0.129403  |
| Tlx3_j2       | 8.34639   | 6.93222         | -0.267833   | 0.244634  | 0.592233  |
| Tlx3          | 1.94645   | 1.87049         | -0.0574287  | 0.695213  | 0.887572  |
| Ranbp17_j2    | 1.0159    | 1.05364         | 0.0526296   | 0.78221   | 0.926386  |
| Kcnip1_j1     | 0.514757  | 0.171246        | -1.58782    | 0.0532831 | 0.268698  |
| Kcnip1_j3     | 2.35023   | 0.581729        | -2.01438    | 2.72E-08  | 1.73E-06  |
| AK015529_j1   | 0.319793  | 0.274622        | -0.219692   | 0.538116  | 0.807846  |
| Dock2_j5      | 0.237321  | 0.266222        | 0.165789    | 0.835029  | 0.946943  |

|             |           |                 |             |           |           |
|-------------|-----------|-----------------|-------------|-----------|-----------|
| Dock2_j12   | 0.113038  | 0.0745507       | -0.600513   | 0.669995  | 1         |
| Ccdc99      | 0.415868  | 0.271523        | -0.615053   | 0.14175   | 0.468358  |
| Fbll1       | 2.30316   | 2.26674         | -0.022991   | 0.903117  | 0.969087  |
| Rars_j1     | 10.1597   | 11.4354         | 0.170656    | 0.406483  | 0.727764  |
| Rars        | 21.3979   | 24.2068         | 0.177946    | 0.0727252 | 0.324526  |
| Odz2_j2     | 0.689965  | 0.288443        | -1.25824    | 5.89E-05  | 0.001367  |
| Odz2_j3     | 0.0967123 | 0 -1.79769e+308 |             | 1.54E-06  | 1         |
| Odz2_j4     | 0.364994  | 0.24829         | -0.555842   | 0.0692969 | 0.315615  |
| Mat2b       | 32.0783   | 27.6894         | 0           | 1         | 1         |
| Ccng1       | 26.6671   | 26.0443         | 0           | 1         | 1         |
| Gabrg2_j8   | 2.6356    | 1.08607         | 0           | 1         | 1         |
| Gabrg2_j9   | 5.146     | 3.14555         | 0           | 1         | 1         |
| Gabrg2_j11  | 2.5421    | 1.41301         | 0           | 1         | 1         |
| Gabrg2_j10  | 2.88193   | 2.17876         | 0           | 1         | 1         |
| Gabra1_j2   | 1.24119   | 0.207815        | 0           | 1         | 1         |
| Gabra1      | 1.1067    | 0.65294         | 0           | 1         | 1         |
| Gabra1_j3   | 8.40249   | 6.57069         | 0           | 1         | 1         |
| Pttg1_j1    | 23.6488   | 22.0328         | -0.102117   | 0.447903  | 0.754594  |
| Pttg1       | 4.71091   | 4.4016          | -0.0979782  | 0.706092  | 0.892648  |
| Ttc1        | 34.2383   | 29.7452         | -0.202954   | 0.0394701 | 0.222024  |
| Adra1b      | 1.20433   | 0.956264        | -0.332748   | 0.152197  | 0.483673  |
| Ublcp1_j1   | 13.0251   | 11.3522         | 0           | 1         | 1         |
| Ublcp1_j11  | 0.0978673 | 0               | 0           | 1         | 1         |
| Gm12161     | 4.21688   | 4.11268         | -0.0360978  | 0.898765  | 0.967647  |
| Lsm11_j4    | 0.7285    | 0.729448        | 0           | 1         | 1         |
| Lsm11       | 1.42167   | 1.02844         | 0           | 1         | 1         |
| Thg1l       | 1.91633   | 1.95817         | 0.0311639   | 0.843732  | 0.950584  |
| Cyfp2_j1    | 27.1236   | 34.9504         | 0           | 1         | 1         |
| Cyfp2_j2    | 0.481268  | 0.265528        | 0           | 1         | 1         |
| Cyfp2_j3    | 8.35475   | 4.43656         | 0           | 1         | 1         |
| Itk_j1      | 0.628813  | 0.778405        | 0.307891    | 0.221274  | 0.568372  |
| Sgcd        | 0.361645  | 0.373306        | 0           | 1         | 1         |
| Gm12183     | 97.1383   | 102.03          | 0.0708754   | 0.408399  | 0.728704  |
| XLOC_004791 | 0.166918  | 0.0741151       | -1.1713     | 0.280304  | 0.629058  |
| Irgm1       | 0.761567  | 0.675502        | -0.173012   | 0.63476   | 0.858242  |
| Irgm1_j2    | 3.53367   | 2.90323         | -0.28351    | 0.130887  | 0.450454  |
| Tgtp2       | 3.52077   | 2.03912         | -0.787946   | 0.0002291 | 0.0042901 |
| Cnot6_j1    | 2.43589   | 1.66621         | 0           | 1         | 1         |
| Cnot6_j2    | 1.34429   | 1.50592         | 0           | 1         | 1         |
| Sqstm1_j8   | 0.28422   | 0.379169        | 0           | 1         | 1         |
| Sqstm1_j9   | 0.55775   | 0.41949         | 0           | 1         | 1         |
| Ltc4s_j1    | 0.248789  | 0.270633        | 0.121412    | 0.897465  | 0.967361  |
| Canx        | 108.995   | 109.666         | 0.00885475  | 0.91823   | 0.974532  |
| Rufy1_j1    | 3.77788   | 4.08048         | 0.111162    | 0.450962  | 0.756347  |
| Rufy1       | 0.702144  | 0.701461        | -0.00140262 | 0.996569  | 0.999083  |
| Zfp354c_j2  | 0.533047  | 0.499533        | 0           | 1         | 1         |
| Zfp354c     | 2.75433   | 2.10787         | 0           | 1         | 1         |



|               |          |                 |            |           |           |
|---------------|----------|-----------------|------------|-----------|-----------|
| Zfp2          | 2.0724   | 1.97856         | -0.0668532 | 0.75152   | 0.913968  |
| Zfp2          | 0.419493 | 0.641202        | 0.612133   | 0.0838112 | 0.353076  |
| Zfp2          | 1.38548  | 1.01203         | -0.453141  | 0.10554   | 0.403518  |
| Zfp354b       | 0.564793 | 0.458592        | -0.300512  | 0.391171  | 0.717835  |
| Zfp354b_j4    | 1.48094  | 1.04313         | -0.505599  | 0.0606335 | 0.290208  |
| Hnrnpab_j5    | 43.1332  | 49.5752         | 0.200822   | 0.0598207 | 0.287845  |
| Hnrnpab_j4    | 8.49133  | 9.43783         | 0.152464   | 0.22951   | 0.576573  |
| Rmnd5b_j1     | 10.5415  | 15.2701         | 0.53463    | 4.06E-06  | 0.0001411 |
| Rmnd5b        | 4.79577  | 5.31253         | 0.147636   | 0.3183    | 0.661707  |
| N4bp3         | 0.520339 | 0.47996         | -0.116538  | 0.72516   | 0.902421  |
| O610009B22Rik | 11.6937  | 12.5388         | 0.100667   | 0.521776  | 0.798368  |
| Sec24a_j4     | 0.118094 | 0.0867376       | -0.445202  | 0.506638  | 1         |
| Sec24a_j5     | 0.618204 | 0.403096        | -0.61696   | 0.0449935 | 0.242451  |
| Sec24a        | 0.961911 | 0.863101        | -0.156375  | 0.469487  | 0.767555  |
| Phf15_j2      | 0.184665 | 0 -1.79769e+308 |            | 3.21E-08  | 2.00E-06  |
| Phf15_j3      | 0.591238 | 0.53514         | -0.143823  | 0.612259  | 0.847331  |
| Ube2b_j2      | 0.283695 | 0               | 0          | 1         | 1         |
| Ube2b_j4      | 0.491203 | 0.0530319       | 0          | 1         | 1         |
| Ube2b_j7      | 7.23564  | 3.40751         | 0          | 1         | 1         |
| Olf1383       | 0.135041 | 0.232996        | 0.786902   | 0.179006  | 0.518629  |
| Tcf7_j3       | 0.194996 | 0.269944        | 0.469216   | 0.401032  | 0.724471  |
| Tcf7          | 0.145961 | 0.0743137       | -0.973883  | 0.293039  | 0.640079  |
| Hspa4_j2      | 8.94126  | 9.22536         | 0          | 1         | 1         |
| Hspa4         | 11.7203  | 6.58928         | 0          | 1         | 1         |
| Uqcrq         | 38.068   | 38.4295         | 0.0136356  | 0.904402  | 0.96954   |
| AK138371      | 1.0873   | 0.429433        | -1.34025   | 0.0009644 | 0.0138988 |
| AK038603_j1   | 0.292935 | 0.245106        | 0          | 1         | 1         |
| Rad50_j1      | 0.387332 | 0.232714        | -0.735013  | 0.0491724 | 0.255597  |
| Rad50         | 1.96106  | 1.76012         | -0.155954  | 0.252532  | 0.600518  |
| Slc22a5_j1    | 1.81017  | 1.46213         | 0          | 1         | 1         |
| Slc22a5       | 1.43124  | 1.64556         | 0          | 1         | 1         |
| Pdlim4        | 11.2596  | 12.8044         | 0.185478   | 0.166201  | 0.502787  |
| Cdc42se2_j1   | 5.23384  | 5.93296         | 0          | 1         | 1         |
| Cdc42se2      | 9.73479  | 10.2306         | 0          | 1         | 1         |
| Lym7_j1       | 1.53075  | 1.3802          | -0.14936   | 0.685368  | 0.882592  |
| Tnip1         | 4.93478  | 5.39217         | 0.127882   | 0.339917  | 0.68005   |
| Tnip1_j6      | 0.365293 | 0.497779        | 0.44645    | 0.113685  | 0.419374  |
| Anxa6         | 141.322  | 144.204         | 0          | 1         | 1         |
| Gm12231       | 155.352  | 152.87          | -0.023231  | 0.794297  | 0.931391  |
| Slc36a2_j2    | 0.561307 | 0.52361         | -0.100297  | 0.758887  | 0.917041  |
| Slc36a2       | 1.0571   | 1.31917         | 0.319524   | 0.176425  | 0.515101  |
| Sparc_j4      | 65.0556  | 69.1486         | 0          | 1         | 1         |
| Sparc_j3      | 10.9748  | 14.6866         | 0          | 1         | 1         |
| Sparc         | 29.3441  | 34.4752         | 0          | 1         | 1         |
| Atox1         | 54.2789  | 58.0018         | 0          | 1         | 1         |
| XLOC_004846   | 0.115807 | 0.113533        | -0.0286149 | 0.984656  | 1         |
| Fam114a2      | 0.164576 | 0.119751        | 0          | 1         | 1         |

|               |           |                 |             |           |           |
|---------------|-----------|-----------------|-------------|-----------|-----------|
| Fam114a2      | 0.602601  | 0.527114        | 0           | 1         | 1         |
| AK007998_j4   | 1.25896   | 0.923535        | -0.446993   | 0.317151  | 0.66048   |
| AK007998_j1   | 0.784388  | 1.02127         | 0.380723    | 0.403333  | 0.726254  |
| AK007998      | 0.679617  | 0.720508        | 0.0842934   | 0.876343  | 0.960704  |
| Gemin5        | 1.11404   | 1.39286         | 0           | 1         | 1         |
| Gemin5_j5     | 0.707517  | 0.12362         | 0           | 1         | 1         |
| XLOC_004853   | 0.154046  | 0.115509        | -0.415351   | 0.668093  | 0.874424  |
| Gm12251       | 83.2452   | 76.3569         | -0.124608   | 0.186329  | 0.526905  |
| Gm12254       | 78.8621   | 99.8812         | 0.340882    | 0.0006068 | 0.0095726 |
| 2210407C18Rik | 0.233909  | 0.107391        | -1.12308    | 0.128597  | 0.446769  |
| Fam183b       | 0.350574  | 0.401012        | 0.193927    | 0.721359  | 0.900355  |
| Rnf187        | 35.9423   | 35.9571         | 0.000594306 | 0.995077  | 0.998643  |
| Rnf187_j4     | 0.656398  | 0.255956        | -1.35868    | 0.0634333 | 0.298808  |
| Obscn_j2      | 0.707821  | 0.475608        | -0.573613   | 0.109855  | 0.412445  |
| A230051G13Rik | 1.66082   | 1.88573         | 0.183226    | 0.223209  | 0.570235  |
| Guk1          | 24.1239   | 25.8923         | 0.10206     | 0.415984  | 0.733677  |
| Arf1          | 13.5733   | 12.3173         | 0           | 1         | 1         |
| Arf1          | 31.4377   | 35.23           | 0           | 1         | 1         |
| Snap47        | 10.8795   | 10.2286         | -0.0889942  | 0.476642  | 0.772215  |
| Snap47_j3     | 0.0580801 | 0 -1.79769e+308 |             | 0.0428751 | 1         |
| Zkscan17_j1   | 0.420457  | 0.386773        | 0           | 1         | 1         |
| Pld6          | 0.167267  | 0.0907414       | -0.882316   | 0.324338  | 0.667432  |
| Flcn          | 7.89543   | 8.23402         | 0.0605783   | 0.589292  | 0.836005  |
| Cops3         | 46.4037   | 40.5705         | -0.193806   | 0.0440612 | 0.239093  |
| AK005951_j1   | 0.196447  | 0.12325         | -0.672557   | 0.420158  | 0.736557  |
| Pemt          | 2.45257   | 2.40556         | -0.0279232  | 0.924119  | 0.976334  |
| Pemt_j3       | 1.39043   | 1.30497         | -0.0915199  | 0.81697   | 0.940566  |
| Pemt_j1       | 2.16533   | 2.20693         | 0.0274603   | 0.93269   | 0.979616  |
| Srebf1_j1     | 1.47679   | 1.5353          | 0.0560579   | 0.661754  | 0.871768  |
| Tom1l2_j2     | 50.5674   | 47.1844         | 0           | 1         | 1         |
| Tom1l2        | 14.8192   | 12.5275         | 0           | 1         | 1         |
| Atpaf2        | 10.2706   | 10.7511         | 0.0659613   | 0.593266  | 0.83794   |
| Flii          | 29.2718   | 31.5238         | 0.106933    | 0.228621  | 0.575633  |
| Flii_j6       | 1.41075   | 1.47643         | 0.0656504   | 0.735204  | 0.906659  |
| Top3a         | 0.816853  | 0.699124        | -0.224528   | 0.259284  | 0.608037  |
| Shmt1_j2      | 0.0493765 | 0.0102326       | -2.27065    | 0.111362  | 1         |
| Tmem11_j1     | 17.8484   | 17.3837         | -0.0380578  | 0.77082   | 0.922089  |
| Tmem11        | 1.108     | 1.31127         | 0.243013    | 0.244036  | 0.591418  |
| Gm16516       | 1.36459   | 2.02048         | 0.56623     | 0.0335938 | 0.200268  |
| Gm16516_j1    | 0.450634  | 0.0558904       | -3.01128    | 0.0331983 | 0.198786  |
| Usp22_j1      | 18.7487   | 19.0844         | 0           | 1         | 1         |
| Usp22_j3      | 3.08743   | 3.8416          | 0           | 1         | 1         |
| Usp22         | 33.2639   | 32.0414         | 0           | 1         | 1         |
| Aldh3a2_j1    | 6.84498   | 6.64235         | 0           | 1         | 1         |
| Aldh3a2       | 11.6776   | 12.5236         | 0           | 1         | 1         |
| Slc47a2_j4    | 0.0521831 | 0.0378187       | -0.464481   | 0.741084  | 1         |
| Slc47a2       | 0.841778  | 1.06634         | 0.341157    | 0.221963  | 0.569158  |

|                  |           |            |               |           |          |
|------------------|-----------|------------|---------------|-----------|----------|
| Rnf112_j6        | 0.123532  | 0          | 0             | 1         | 1        |
| Rnf112_j5        | 0.197397  | 0          | 0             | 1         | 1        |
| Rnf112_j4        | 5.04101   | 4.14634    | 0             | 1         | 1        |
| Mapk7_j1         | 1.4533    | 1.84474    | 0.344089      | 0.230729  | 0.577701 |
| Mapk7            | 2.9028    | 3.73029    | 0.361843      | 0.0362047 | 0.210104 |
| Mapk7            | 0.787984  | 0.490582   | -0.683672     | 0.0625918 | 0.296149 |
| Epn2_j6          | 0.0528388 | 0.0504484  | 0             | 1         | 1        |
| Epn2             | 4.23341   | 4.16378    | 0             | 1         | 1        |
| Epn2             | 5.23814   | 4.94457    | 0             | 1         | 1        |
| Prpsap2_j1       | 0.587241  | 0.507272   | -0.211192     | 0.46531   | 0.765215 |
| Ulk2             | 10.9542   | 10.2101    | 0             | 1         | 1        |
| Akap10           | 4.58766   | 4.89448    | 0.0933997     | 0.35846   | 0.693858 |
| Ncor1_j3         | 0.360518  | 0.337821   | 0             | 1         | 1        |
| Ncor1_j2         | 2.11484   | 2.23087    | 0             | 1         | 1        |
| BC046404         | 0.532541  | 0.62493    | 0.230802      | 0.351275  | 0.688409 |
| Zfp287_j2        | 1.76955   | 1.63456    | -0.114486     | 0.490194  | 0.77988  |
| Zfp287_j4        | 1.61094   | 1.55157    | -0.0541698    | 0.780133  | 0.925824 |
| Zfp286_j3        | 0.222931  | 0.0288053  | -2.9522       | 0.0169174 | 0.125322 |
| Zfp286           | 0.92995   | 0.596425   | -0.640812     | 0.0304358 | 0.187508 |
| AK043365         | 0.336012  | 0.174694   | -0.943681     | 0.12512   | 0.440627 |
| XLOC_004917      | 0.121466  | 0.107653   | -0.174169     | 0.837082  | 1        |
| Hs3st3b1         | 0.307858  | 0.154666   | -0.993105     | 0.0309756 | 0.189775 |
| Cox10            | 1.44607   | 1.53244    | 0.0836969     | 0.608759  | 0.84604  |
| Arhgap44_j9      | 3.04247   | 0          | 0             | 1         | 1        |
| Arhgap44_j6      | 11.0343   | 9.22775    | 0             | 1         | 1        |
| Map2k4_j3        | 3.93177   | 2.61626    | 0             | 1         | 1        |
| Map2k4           | 29.1165   | 21.9143    | 0             | 1         | 1        |
| Map2k4           | 8.31295   | 4.51459    | 0             | 1         | 1        |
| Shisa6_j4        | 0.728008  | 0.888073   | 0.286724      | 0.303052  | 0.648824 |
| 2310004I24Rik_j3 | 1.09      | 0.925991   | 0             | 1         | 1        |
| 2310004I24Rik    | 1.68173   | 1.77       | 0             | 1         | 1        |
| Ndel1            | 54.2396   | 53.613     | 0             | 1         | 1        |
| Arhgef15_j3      | 0.242974  | 0.170447   | -0.511479     | 0.296832  | 0.643452 |
| Pfas_j3          | 0.150452  | 0          | 0             | 1         | 1        |
| Pfas             | 0.270019  | 0.192933   | 0             | 1         | 1        |
| Cntrob           | 3.15713   | 2.999      | -0.074133     | 0.550481  | 0.815351 |
| Chd3_j1          | 0.0592186 | 0          | 0             | 1         | 1        |
| Chd3_j2          | 5.80169   | 1.5649     | 0             | 1         | 1        |
| Tmem88           | 2.90775   | 2.69191    | 0             | 1         | 1        |
| Kdm6b_j4         | 1.08323   | 1.09938    | 0             | 1         | 1        |
| Kdm6b_j3         | 1.43325   | 0.752719   | 0             | 1         | 1        |
| Kdm6b_j5         | 1.45164   | 0.434821   | 0             | 1         | 1        |
| Dnahc2_j3        | 0.107199  | 0.00993372 | -3.43182      | 0.210257  | 1        |
| Dnahc2_j6        | 0.0757616 | 0          | -1.79769e+308 | 0.0302322 | 1        |
| Dnahc2_j11       | 0.0533909 | 0          | -1.79769e+308 | 0.0432833 | 1        |
| Wrap53           | 1.84574   | 2.12459    | 0.202989      | 0.250388  | 0.598108 |
| Atp1b2_j1        | 12.2402   | 12.2698    | 0.00348546    | 0.979184  | 0.993951 |

|                  |           |                 |             |           |           |
|------------------|-----------|-----------------|-------------|-----------|-----------|
| Atp1b2           | 21.5159   | 21.6078         | 0.00614974  | 0.950034  | 0.985549  |
| Supl15h          | 4.63476   | 4.11107         | -0.172979   | 0.437887  | 0.747849  |
| Mpdu1_j1         | 3.85939   | 4.32436         | 0.164112    | 0.469979  | 0.767944  |
| Mpdu1            | 19.4926   | 19.8008         | 0.0226294   | 0.847838  | 0.951833  |
| Eif4a1_j5        | 0.378767  | 0.476345        | 0           | 1         | 1         |
| Eif4a1_j6        | 1.7491    | 1.93289         | 0           | 1         | 1         |
| Senp3            | 15.9763   | 15.8795         | -0.00876432 | 0.933472  | 0.979817  |
| Polr2a           | 6.52831   | 5.79732         | 0           | 1         | 1         |
| Fgf11            | 4.83911   | 7.41568         | 0.615837    | 2.35E-07  | 1.14E-05  |
| Nlgn2            | 0.713353  | 0.905305        | 0.343787    | 0.116457  | 0.424494  |
| Kctd11           | 3.25643   | 5.49541         | 0.754938    | 5.61E-09  | 4.12E-07  |
| Acap1_j4         | 0.142802  | 0.0343836       | -2.05422    | 0.336744  | 0.67717   |
| Acap1_j5         | 0.243974  | 0.0536415       | -2.18531    | 0.161774  | 0.496761  |
| 2810408A11Rik_j6 | 0.126694  | 0.059973        | -1.07897    | 0.363938  | 1         |
| Eif5a_j3         | 0.0333429 | 0.049626        | 0           | 1         | 1         |
| Rai12_j1         | 4.39532   | 5.13352         | 0.223979    | 0.221326  | 0.56847   |
| Acadvl           | 34.8073   | 34.1456         | -0.0276915  | 0.766725  | 0.920466  |
| Slc16a13_j5      | 0.291024  | 0.348122        | 0.258456    | 0.581821  | 0.832547  |
| Slc16a13         | 0.20446   | 0 -1.79769e+308 |             | 2.04E-05  | 0.0005634 |
| Bcl6b_j4         | 0.116991  | 0.0144599       | -3.01627    | 0.24148   | 1         |
| 0610010K14Rik_j9 | 12.5997   | 14.8399         | 0.236098    | 0.0927817 | 0.374764  |
| 0610010K14Rik_j8 | 46.3113   | 46.2116         | -0.00310882 | 0.975245  | 0.99287   |
| Alox12_j1        | 0.0497408 | 0 -1.79769e+308 |             | 0.0357321 | 1         |
| Alox12           | 0.573663  | 0.24989         | -1.19891    | 0.0097401 | 0.0839896 |
| Pelp1            | 2.50286   | 2.21248         | -0.177913   | 0.232904  | 0.580139  |
| Cxcl16           | 0.0262904 | 0.17794         | 2.75879     | 0.0006889 | 0.0105859 |
| Vmo1_j3          | 0.136614  | 0.20404         | 0.578744    | 0.346614  | 0.685483  |
| Slc25a11         | 41.5273   | 36.6297         | -0.181046   | 0.0588581 | 0.285245  |
| Camta2_j1        | 4.86798   | 5.29512         | 0           | 1         | 1         |
| Camta2_j3        | 0.626958  | 0.648793        | 0           | 1         | 1         |
| Nup88_j1         | 4.84398   | 5.15659         | 0           | 1         | 1         |
| Nup88            | 9.53917   | 9.61662         | 0           | 1         | 1         |
| C1qbp            | 15.6384   | 15.5093         | 0           | 1         | 1         |
| Dhx33_j6         | 0.606164  | 0.200593        | 0           | 1         | 1         |
| Dhx33            | 2.32488   | 1.88212         | 0           | 1         | 1         |
| Derl2            | 2.11822   | 1.98686         | 0           | 1         | 1         |
| 6330403K07Rik    | 26.5042   | 25.2113         | 0           | 1         | 1         |
| Pitpnm3          | 0.389578  | 0.202412        | -0.944621   | 0.0120271 | 0.0983906 |
| Pitpnm3_j6       | 0.0634225 | 0.0559727       | -0.180271   | 0.821552  | 1         |
| 4933427D14Rik    | 1.42794   | 1.67257         | 0.228132    | 0.117666  | 0.426871  |
| Med31_j1         | 11.1544   | 13.3149         | 0.255429    | 0.109021  | 0.410746  |
| Med31            | 1.47564   | 1.43225         | -0.0430581  | 0.813695  | 0.939177  |
| Smtnl2           | 0.515895  | 0.345528        | -0.578277   | 0.102629  | 0.396874  |
| Spns2            | 0.351355  | 0.356173        | 0           | 1         | 1         |
| Spns2_j2         | 5.72891   | 3.78064         | 0           | 1         | 1         |
| Ctns             | 3.10892   | 2.98303         | 0           | 1         | 1         |
| Aspa             | 17.3774   | 15.778          | -0.139297   | 0.234251  | 0.581678  |

|              |           |             |            |          |          |
|--------------|-----------|-------------|------------|----------|----------|
| mKIAA1039_j5 | 0.111969  | 0           | 0          | 1        | 1        |
| mKIAA1039_j6 | 6.70851   | 5.72022     | 0          | 1        | 1        |
| Rap1gap2     | 11.3988   | 7.73733     | 0          | 1        | 1        |
| Pafah1b1_j1  | 85.3095   | 72.4986     | 0          | 1        | 1        |
| Pafah1b1_j3  | 88.2601   | 86.3214     | 0          | 1        | 1        |
| Pafah1b1     | 23.0427   | 17.7905     | 0          | 1        | 1        |
| Srr_j1       | 0         | 1.083       | 0          | 1        | 1        |
| Srr_j2       | 3.46295   | 3.1618      | 0          | 1        | 1        |
| Hic1         | 0.481202  | 0.339549    | -0.503025  | 0.166765 | 0.503133 |
| Ovca2        | 2.47747   | 3.69872     | 0          | 1        | 1        |
| Dph1         | 7.10101   | 8.03326     | 0          | 1        | 1        |
| Rpa1_j3      | 9.91026   | 5.29773     | 0          | 1        | 1        |
| Rpa1         | 12.1688   | 9.26559     | 0          | 1        | 1        |
| Serpinf1     | 56.2869   | 75.4426     | 0.422579   | 2.08E-06 | 7.84E-05 |
| Wdr81        | 2.56946   | 2.84123     | 0.14505    | 0.236087 | 0.583364 |
| Doc2b        | 0.466841  | 0.970762    | 1.05619    | 1.31E-07 | 6.80E-06 |
| Fam101b      | 2.3006    | 2.58314     | 0          | 1        | 1        |
| Vps53_j2     | 17.2624   | 13.596      | 0          | 1        | 1        |
| Vps53        | 4.72005   | 4.3559      | 0          | 1        | 1        |
| Gemin4_j1    | 0.260697  | 0.245187    | -0.088491  | 0.765791 | 0.920003 |
| Glod4        | 5.60439   | 5.25936     | -0.0916709 | 0.507385 | 0.789644 |
| Nxn_j2       | 0.849278  | 0.000413593 | 0          | 1        | 1        |
| Nxn          | 3.9183    | 3.43245     | 0          | 1        | 1        |
| Abr_j1       | 23.5545   | 26.5255     | 0          | 1        | 1        |
| Abr_j9       | 13.1393   | 13.5279     | 0          | 1        | 1        |
| Gosr1        | 7.09127   | 7.66097     | 0          | 1        | 1        |
| Cpd          | 6.43911   | 5.7615      | -0.160416  | 0.119197 | 0.429562 |
| Ccdc55       | 4.55163   | 4.83047     | 0.0857809  | 0.510297 | 0.791044 |
| Efcab5       | 0.0471214 | 0.0307588   | -0.615384  | 0.62757  | 1        |
| Efcab5_j10   | 0.11139   | 0.12595     | 0.177238   | 0.856374 | 1        |
| Ankrd13b     | 1.87627   | 1.35114     | 0          | 1        | 1        |
| Taok1_j6     | 0.505295  | 0.173881    | 0          | 1        | 1        |
| Pipox        | 0.128942  | 0.21999     | 0.770721   | 0.344798 | 0.684393 |
| Pipox_j7     | 0.420187  | 0.000144815 | -11.5026   | 0.84305  | 0.950311 |
| AK053376     | 0.573797  | 0.613962    | 0          | 1        | 1        |
| Eral1        | 12.4331   | 12.1655     | -0.0313929 | 0.784479 | 0.927523 |
| Traf4        | 0.787356  | 0.838921    | 0.0915189  | 0.553634 | 0.817251 |
| Nek8_j2      | 1.1297    | 1.37845     | 0          | 1        | 1        |
| Nek8_j1      | 2.00597   | 1.83532     | 0          | 1        | 1        |
| Rpl23a_j6    | 3.6506    | 4.40382     | 0          | 1        | 1        |
| Supt6h_j4    | 1.81574   | 0.993384    | 0          | 1        | 1        |
| Sarm1_j3     | 0.351904  | 0           | 0          | 1        | 1        |
| Sarm1        | 9.24487   | 9.36079     | 0          | 1        | 1        |
| Tmem199      | 17.2827   | 17.8188     | 0          | 1        | 1        |
| Tnfaip1      | 1.14024   | 1.23118     | 0          | 1        | 1        |
| Tnfaip1      | 0.751491  | 0.888293    | 0          | 1        | 1        |
| Tmem97_j2    | 0.653722  | 0.555705    | -0.234358  | 0.791147 | 0.930371 |

|                  |           |                 |            |           |           |
|------------------|-----------|-----------------|------------|-----------|-----------|
| Nlk              | 9.88689   | 8.71683         | -0.181714  | 0.086616  | 0.359714  |
| Lgals9           | 6.6834    | 6.8741          | 0          | 1         | 1         |
| Ksr1_j7          | 0.958093  | 0.79296         | -0.272917  | 1         | 1         |
| Ksr1_j6          | 0.0687938 | 0 -1.79769e+308 |            | 0.0008818 | 1         |
| Ksr1_j18         | 0.951872  | 0 -1.79769e+308 |            | 1.06E-11  | 1.29E-09  |
| Wsb1             | 10.56     | 10.564          | 0          | 1         | 1         |
| Wsb1             | 9.6934    | 9.71497         | 0          | 1         | 1         |
| Wsb1_j1          | 6.7001    | 6.81192         | 0          | 1         | 1         |
| Omg              | 10.4844   | 5.92323         | -0.823793  | 4.63E-08  | 2.75E-06  |
| Utp6             | 9.45957   | 9.05727         | -0.0626983 | 0.557934  | 0.819817  |
| Crlf3_j2         | 3.33553   | 3.46628         | 0.0554737  | 0.810523  | 0.937901  |
| Crlf3            | 5.82482   | 5.16914         | -0.172289  | 0.232568  | 0.579683  |
| 1110002N22Rik    | 1.84783   | 1.54717         | -0.256197  | 0.353847  | 0.690069  |
| 5730455P16Rik_j1 | 0.115669  | 0               | 0          | 1         | 1         |
| 5730455P16Rik    | 13.0686   | 10.717          | 0          | 1         | 1         |
| Myo1d_j3         | 0.368262  | 0.300134        | 0          | 1         | 1         |
| Myo1d            | 5.22794   | 4.25992         | 0          | 1         | 1         |
| Accn1_j1         | 11.1894   | 9.74343         | 0          | 1         | 1         |
| Ccl1_j1          | 0.549778  | 0.505249        | -0.121855  | 0.791613  | 0.930476  |
| Cct6b_j9         | 0.334808  | 0.0961639       | -1.79977   | 0.0202592 | 0.142127  |
| Cct6b_j10        | 0.225611  | 0 -1.79769e+308 |            | 1.79E-06  | 6.85E-05  |
| Gm11423          | 0.244379  | 0.244733        | 0.00208757 | 0.998068  | 0.999228  |
| Rffl_j4          | 1.6195    | 0.986772        | -0.714761  | 0.0006218 | 0.0097715 |
| Rffl             | 2.23537   | 2.28607         | 0.0323598  | 0.834916  | 0.946943  |
| Rad51l3          | 4.71666   | 4.47819         | -0.0748505 | 0.486202  | 0.777426  |
| Nle1_j6          | 0.0933725 | 0.0224897       | -2.05373   | 0.213176  | 1         |
| Nle1             | 0.648671  | 0.772463        | 0.251979   | 0.273842  | 0.623001  |
| Nle1_j7          | 1.89446   | 2.03722         | 0.10481    | 0.674137  | 0.877053  |
| Mmp28_j3         | 0.236715  | 0.0728654       | 0          | 1         | 1         |
| Mmp28            | 1.40806   | 1.21672         | 0          | 1         | 1         |
| Ccl5             | 0.839843  | 1.57732         | 0.909282   | 0.0206635 | 0.144092  |
| Ccl9             | 0.324067  | 1.21003         | 1.90067    | 6.79E-07  | 2.97E-05  |
| Ccl6             | 0.631413  | 1.09258         | 0.791078   | 0.0079314 | 0.0721597 |
| Dusp14           | 2.87598   | 2.43717         | -0.238843  | 0.304051  | 0.649781  |
| Tada2a_j4        | 1.56561   | 1.66777         | 0          | 1         | 1         |
| Tada2a           | 3.10107   | 2.59912         | 0          | 1         | 1         |
| Aatf             | 4.42012   | 5.63381         | 0.350026   | 0.0262127 | 0.169964  |
| Aatf_j1          | 2.07551   | 2.24992         | 0.116406   | 0.610541  | 0.846532  |
| Mrm1_j2          | 1.18319   | 1.19757         | 0.0174293  | 0.958721  | 0.988082  |
| Mrm1             | 2.66687   | 3.46772         | 0.378843   | 0.0184841 | 0.133518  |
| Dhrs11_j1        | 0.0810247 | 0 -1.79769e+308 |            | 0.0202025 | 1         |
| Dhrs11           | 2.56927   | 2.15617         | -0.252885  | 0.288704  | 0.636345  |
| Ggnbp2_j9        | 2.99816   | 3.08034         | 0.0390104  | 0.819456  | 0.941524  |
| Ggnbp2_j6        | 2.82922   | 1.84516         | -0.616654  | 0.0104228 | 0.0881454 |
| Znhit3           | 0.234834  | 0.178117        | -0.398819  | 0.725035  | 0.902318  |
| Usp32_j4         | 17.5904   | 14.6833         | 0          | 1         | 1         |
| Usp32_j2         | 1.04527   | 0.497149        | 0          | 1         | 1         |

|               |           |             |               |           |           |
|---------------|-----------|-------------|---------------|-----------|-----------|
| Usp32         | 12.2728   | 9.55502     | 0             | 1         | 1         |
| Appbp2        | 3.49159   | 3.03926     | 0             | 1         | 1         |
| XLOC_005083   | 0.0851004 | 4.69E-05    | -10.8267      | 0.944327  | 1         |
| XLOC_005083   | 0.0526118 | 0.0276682   | -0.92716      | 0.479178  | 1         |
| AK135737_j1   | 0.134177  | 0.19139     | 0.512379      | 0.369763  | 0.703204  |
| Ints2_j3      | 1.89126   | 2.16329     | 0.193884      | 0.215761  | 0.561549  |
| Ints2         | 0.118342  | 0.278495    | 1.23469       | 0.0005667 | 0.0090474 |
| Med13         | 1.48273   | 1.06701     | 0             | 1         | 1         |
| Rps6kb1       | 3.51979   | 3.46396     | 0             | 1         | 1         |
| Cltc          | 55.4427   | 57.5367     | 0             | 1         | 1         |
| Cltc_j4       | 0.429916  | 0.130925    | 0             | 1         | 1         |
| Dhx40         | 8.51509   | 7.71141     | -0.143027     | 0.189066  | 0.530662  |
| Ypel2         | 3.02127   | 2.4308      | -0.313724     | 0.0277755 | 0.176624  |
| Gdpd1_j1      | 9.41125   | 10.1574     | 0.110071      | 0.446922  | 0.753618  |
| Gdpd1         | 9.81654   | 11.6309     | 0.244681      | 0.0345171 | 0.203951  |
| 1200011M11Rik | 5.0367    | 4.95891     | -0.0224549    | 0.864866  | 0.956985  |
| Ppm1e         | 7.53581   | 3.7313      | 0             | 1         | 1         |
| Rad51c        | 0.662392  | 0.481363    | -0.460559     | 0.131625  | 0.451625  |
| Dynll2        | 321.592   | 291.063     | -0.143899     | 0.107675  | 0.407901  |
| Msi2_j2       | 0.615105  | 0.859249    | 0             | 1         | 1         |
| Msi2_j4       | 0.748268  | 0.196998    | 0             | 1         | 1         |
| Msi2          | 3.75233   | 3.32629     | 0             | 1         | 1         |
| Msi2          | 4.1338    | 3.8555      | 0             | 1         | 1         |
| Akap1         | 5.91872   | 6.99459     | 0.240953      | 0.0389754 | 0.220157  |
| Scpep1_j1     | 0.591328  | 4.10702     | 0             | 1         | 1         |
| Scpep1        | 19.007    | 35.4464     | 0             | 1         | 1         |
| Dgke          | 4.75032   | 3.754       | 0             | 1         | 1         |
| Pctp          | 5.24767   | 2.80925     | -0.901495     | 5.59E-07  | 2.49E-05  |
| Hlf           | 0.0997604 | 0.000141017 | -9.46645      | 0.774569  | 1         |
| Hlf           | 0.68705   | 0.479902    | -0.517675     | 0.0547851 | 0.273012  |
| Stxbp4        | 1.41283   | 1.28345     | -0.138555     | 0.377862  | 0.709468  |
| Tom1l1        | 3.39474   | 3.63578     | 0.0989623     | 0.433124  | 0.744598  |
| Utp18         | 1.81515   | 2.04874     | 0.174647      | 0.350676  | 0.687982  |
| Nme1_j4       | 1.1631    | 0           | -1.79769e+308 | 0.0003461 | 0.005999  |
| Wfikkn2_j1    | 0.0990719 | 0.0565164   | -0.809805     | 0.447879  | 1         |
| Luc7l3_j1     | 0.276375  | 0.192395    | 0             | 1         | 1         |
| Luc7l3_j2     | 3.24634   | 3.20745     | 0             | 1         | 1         |
| Luc7l3_j5     | 1.1776    | 0.912109    | 0             | 1         | 1         |
| Abcc3_j3      | 0.6132    | 0.423529    | -0.5339       | 0.462359  | 0.763237  |
| Abcc3_j4      | 0.282706  | 0.460708    | 0.70455       | 0.263805  | 0.612637  |
| Abcc3         | 0.197722  | 0.1458      | -0.439478     | 0.383156  | 0.712878  |
| Epn3_j1       | 1.00527   | 0.726032    | 0             | 1         | 1         |
| Epn3          | 4.41647   | 2.55195     | 0             | 1         | 1         |
| Rsad1_j8      | 0.0741503 | 0.0222688   | 0             | 1         | 1         |
| Rsad1         | 0.427773  | 0.335108    | 0             | 1         | 1         |
| Acsf2_j6      | 0.133017  | 0.08966     | -0.56907      | 0.487864  | 1         |
| Acsf2_j7      | 0.352816  | 0.268233    | -0.395431     | 0.569138  | 0.825749  |

|               |           |           |            |           |           |
|---------------|-----------|-----------|------------|-----------|-----------|
| Eme1_j2       | 0.0780363 | 0.0449366 | -0.796255  | 0.429865  | 1         |
| Xylt2         | 0.896802  | 0.715625  | -0.325587  | 0.082447  | 0.34984   |
| Pdk2          | 0.314885  | 0.307999  | -0.0318956 | 0.909117  | 0.971253  |
| Itga3_j2      | 1.16502   | 0.583629  | -0.997229  | 0.0143981 | 0.111703  |
| Itga3_j3      | 0.507685  | 0.243543  | -1.05976   | 0.0002037 | 0.0038977 |
| Itga3_j10     | 0.0498031 | 0.0198126 | -1.32982   | 0.495103  | 1         |
| Myst2_j1      | 6.50599   | 7.9294    | 0          | 1         | 1         |
| Myst2_j2      | 9.78062   | 11.3827   | 0          | 1         | 1         |
| Myst2_j3      | 4.98525   | 3.45182   | 0          | 1         | 1         |
| Myst2         | 12.4918   | 11.4239   | 0          | 1         | 1         |
| Nxph3         | 3.20613   | 3.48488   | 0.120274   | 0.50957   | 0.790813  |
| Ngfr_j1       | 16.5863   | 3.30009   | 0          | 1         | 1         |
| Ngfr          | 108.232   | 89.2841   | 0          | 1         | 1         |
| Abi3          | 0.769758  | 0.689084  | -0.159724  | 0.526153  | 0.800979  |
| Ube2z         | 13.3363   | 12.2269   | 0          | 1         | 1         |
| Atp5g1_j1     | 11.5323   | 11.6032   | 0.00884183 | 0.928285  | 0.977872  |
| AK002860_j1   | 0.293504  | 0.212851  | -0.463539  | 0.594264  | 0.83843   |
| Snx11_j6      | 0.510935  | 0         | 0          | 1         | 1         |
| Snx11         | 8.50082   | 7.8089    | 0          | 1         | 1         |
| Snx11         | 4.01191   | 3.68394   | 0          | 1         | 1         |
| Nfe2l1_j1     | 0.773715  | 0.690942  | 0          | 1         | 1         |
| Nfe2l1_j2     | 4.55777   | 3.46739   | 0          | 1         | 1         |
| Cdk5rap3      | 9.10677   | 8.6977    | -0.066306  | 0.616472  | 0.848853  |
| Pnpo          | 10.1784   | 9.23018   | -0.141074  | 0.234688  | 0.582023  |
| Sp2           | 1.00975   | 1.03138   | 0.0305701  | 0.912107  | 0.972315  |
| Tbkbp1_j4     | 3.78968   | 3.8337    | 0          | 1         | 1         |
| Tbkbp1_j3     | 2.57877   | 2.43711   | 0          | 1         | 1         |
| Tbkbp1_j2     | 0         | 0.26929   | 0          | 1         | 1         |
| Kpnb1         | 3.75549   | 3.62888   | 0          | 1         | 1         |
| Npepps        | 24.7227   | 22.4126   | 0          | 1         | 1         |
| Gpr179_j1     | 0.266394  | 0.170669  | -0.642354  | 0.0730824 | 0.325521  |
| Srcin1_j9     | 0.4787    | 0.698947  | 0          | 1         | 1         |
| Srcin1_j14    | 0.0527596 | 0         | 0          | 1         | 1         |
| Srcin1_j15    | 0.563086  | 0.297015  | 0          | 1         | 1         |
| E130012A19Rik | 0.445709  | 0.498208  | 0.160646   | 0.62165   | 0.851843  |
| AK155239      | 4.58372   | 1.67138   | 0          | 1         | 1         |
| Pcgf2_j5      | 0.228107  | 0.19455   | -0.229571  | 0.677016  | 0.878636  |
| Cwc25         | 4.47709   | 4.54951   | 0          | 1         | 1         |
| Rpl23_j2      | 1.00445   | 1.28933   | 0.360206   | 0.432863  | 0.744519  |
| Rpl23_j1      | 2.65976   | 2.81691   | 0.0828203  | 0.781873  | 0.926329  |
| Rpl23_j3      | 2.10441   | 2.88409   | 0.454701   | 0.134147  | 0.455891  |
| Plxdc1        | 0.538673  | 0.698681  | 0.375224   | 0.257735  | 0.606502  |
| Plxdc1_j4     | 0.054447  | 0.1341    | 1.30039    | 0.154672  | 1         |
| Arl5c         | 0.147677  | 0.100953  | -0.548768  | 0.636379  | 0.859038  |
| Cacnb1        | 13.0511   | 15.0356   | 0          | 1         | 1         |
| Stac2_j3      | 2.80993   | 4.45485   | 0.664842   | 0.0031313 | 0.0356669 |
| Stac2         | 24.484    | 24.2287   | -0.0151197 | 0.872965  | 0.959782  |



|                  |           |           |               |           |           |
|------------------|-----------|-----------|---------------|-----------|-----------|
| Fbxl20           | 3.8992    | 3.4932    | 0             | 1         | 1         |
| Fbxl20_j1        | 1.09824   | 1.52757   | 0             | 1         | 1         |
| Fbxl20           | 1.31364   | 0.732591  | 0             | 1         | 1         |
| Med1_j2          | 0.510084  | 0         | 0             | 1         | 1         |
| Med1_j8          | 0.565107  | 0.582842  | 0             | 1         | 1         |
| Med1_j7          | 0.732069  | 0.840461  | 0             | 1         | 1         |
| Pgap3            | 1.02564   | 1.19323   | 0             | 1         | 1         |
| Pgap3_j1         | 3.04551   | 2.19199   | 0             | 1         | 1         |
| 1810046J19Rik_j3 | 32.8323   | 40.1087   | 0             | 1         | 1         |
| Ikzf3_j2         | 0.154993  | 0.0766667 | -1.01554      | 0.342504  | 0.682278  |
| Ikzf3_j1         | 0.133728  | 0.0458017 | -1.54583      | 0.176776  | 1         |
| Ormdl3           | 20.2458   | 22.3773   | 0.144412      | 0.157662  | 0.491756  |
| Med24_j3         | 2.42095   | 5.34035   | 0             | 1         | 1         |
| Med24_j2         | 8.01265   | 3.35651   | 0             | 1         | 1         |
| Nr1d1_j1         | 1.49947   | 1.24167   | -0.272169     | 0.129824  | 0.448824  |
| Top2a_j3         | 0.338678  | 0.0655029 | -2.37028      | 0.129273  | 0.448145  |
| Top2a_j4         | 0.104093  | 0.0637228 | -0.707991     | 0.574642  | 1         |
| Smarce1_j2       | 0.836029  | 1.06321   | 0             | 1         | 1         |
| Krt222           | 1.96748   | 1.31699   | 0             | 1         | 1         |
| Krt222           | 5.68196   | 3.92526   | 0             | 1         | 1         |
| Krt26_j1         | 0.074567  | 0.111255  | 0.57726       | 0.588299  | 1         |
| Krt27_j1         | 0         | 0.243232  | 1.79769e+308  | 0.0165529 | 0.123391  |
| Krt10_j1         | 2.77278   | 2.69244   | -0.04242      | 0.918593  | 0.974658  |
| Krt19_j3         | 0.494517  | 1.19727   | 1.27565       | 0.0233489 | 0.156652  |
| Krt19            | 0.446526  | 1.30498   | 1.54721       | 1.91E-06  | 7.26E-05  |
| Krt9_j2          | 0.0841208 | 0.132442  | 0.654822      | 0.507029  | 1         |
| Hap1_j6          | 1.102     | 0.960984  | 0             | 1         | 1         |
| Hap1_j7          | 0.503905  | 0         | 0             | 1         | 1         |
| Hap1             | 1.55401   | 1.25326   | 0             | 1         | 1         |
| Jup_j2           | 2.34665   | 7.31072   | 0             | 1         | 1         |
| Jup              | 33.4663   | 33.4749   | 0             | 1         | 1         |
| Leprel4          | 1.66323   | 1.76923   | 0.0891324     | 0.685046  | 0.882455  |
| Nt5c3l           | 11.9622   | 12.4583   | 0.058628      | 0.664871  | 0.873063  |
| Klhl11           | 10.0395   | 7.64286   | -0.393505     | 4.67E-05  | 0.0011262 |
| Acly_j3          | 10.8209   | 5.2535    | 0             | 1         | 1         |
| Acly             | 65.2157   | 68.8975   | 0             | 1         | 1         |
| Dnajc7_j3        | 0.361926  | 0.312945  | -0.209787     | 0.47123   | 0.76878   |
| Dnajc7_j10       | 0.0532812 | 0.0227173 | -1.22984      | 0.350968  | 1         |
| Dhx58_j1         | 0.362552  | 0         | -1.79769e+308 | 8.62E-08  | 4.71E-06  |
| Dhx58            | 0.632158  | 0.970877  | 0.619002      | 0.0257885 | 0.168001  |
| Kat2a_j3         | 2.09311   | 4.23796   | 0             | 1         | 1         |
| Kat2a            | 13.7859   | 14.6248   | 0             | 1         | 1         |
| Rab5c_j1         | 42.125    | 45.0888   | 0             | 1         | 1         |
| Rab5c            | 16.2262   | 16.9326   | 0             | 1         | 1         |
| Ghdc             | 2.84896   | 4.54105   | 0             | 1         | 1         |
| Stat5b_j2        | 2.69346   | 3.66384   | 0             | 1         | 1         |
| Stat5b           | 5.19995   | 5.48588   | 0             | 1         | 1         |

|                  |           |                 |            |           |           |
|------------------|-----------|-----------------|------------|-----------|-----------|
| Stat5b_j4        | 1.93892   | 3.16128         | 0          | 1         | 1         |
| Stat3_j1         | 46.4221   | 57.2691         | 0          | 1         | 1         |
| Stat3            | 42.7634   | 44.1768         | 0          | 1         | 1         |
| Stat3            | 11.946    | 15.4365         | 0          | 1         | 1         |
| Stat3            | 7.29481   | 6.7225          | 0          | 1         | 1         |
| Ptrf             | 1.83588   | 2.46012         | 0.42226    | 0.0081629 | 0.0737159 |
| Psmc3ip          | 0.489697  | 0.420478        | 0          | 1         | 1         |
| Fam134c          | 3.45013   | 3.3786          | 0          | 1         | 1         |
| Plekhh3_j7       | 0.369786  | 0 -1.79769e+308 |            | 2.19E-08  | 1.42E-06  |
| Ezh1_j1          | 0.5803    | 0.475627        | 0          | 1         | 1         |
| Ccdc56           | 20.1433   | 21.2868         | 0.0796582  | 0.428503  | 0.742369  |
| Becn1            | 57.8064   | 59.455          | 0.0405694  | 0.644247  | 0.862839  |
| Aarsd1_j1        | 12.9604   | 14.3165         | 0          | 1         | 1         |
| Aarsd1           | 3.75895   | 3.59083         | 0          | 1         | 1         |
| 1700113I22Rik_j4 | 0.0805544 | 0.0566789       | -0.507151  | 0.740467  | 1         |
| Vat1             | 50.9108   | 63.4106         | 0          | 1         | 1         |
| Etv4_j1          | 0.416568  | 0.370154        | -0.170426  | 0.683278  | 0.881397  |
| Etv4_j3          | 0.8167    | 0.384462        | -1.08697   | 0.0056889 | 0.0560494 |
| Etv4_j5          | 0.138426  | 0.0734891       | -0.913517  | 0.362001  | 0.696369  |
| Meox1            | 0.185441  | 0.317327        | 0.775009   | 0.103419  | 0.398633  |
| Dusp3_j1         | 8.9299    | 8.64363         | 0          | 1         | 1         |
| Dusp3            | 33.3733   | 32.3478         | 0          | 1         | 1         |
| Mpp3             | 1.95022   | 2.05423         | 0.0749612  | 0.681379  | 0.880288  |
| Mpp2             | 3.7532    | 3.36236         | 0          | 1         | 1         |
| Tmem101_j1       | 4.77982   | 6.2008          | 0          | 1         | 1         |
| Tmem101          | 8.04547   | 6.44613         | 0          | 1         | 1         |
| Lsm12            | 2.06442   | 2.32769         | 0.173164   | 0.486213  | 0.777426  |
| Hdac5_j2         | 0.346195  | 0               | 0          | 1         | 1         |
| Atxn7l3_j6       | 0.903352  | 0.785789        | 0          | 1         | 1         |
| Atxn7l3          | 2.31361   | 0.480644        | 0          | 1         | 1         |
| Ubtj_j6          | 0.180988  | 0               | 0          | 1         | 1         |
| Ubtj_j7          | 0         | 0.0926727       | 0          | 1         | 1         |
| Ubtj_j10         | 0.247771  | 0.290753        | 0          | 1         | 1         |
| Slc25a39         | 7.09286   | 8.31006         | 0          | 1         | 1         |
| Fam171a2_j2      | 2.97634   | 3.77331         | 0.34229    | 0.0659349 | 0.306374  |
| Fam171a2         | 13.8517   | 15.9655         | 0.204894   | 0.053226  | 0.268469  |
| Gpatch8_j5       | 2.50081   | 2.07258         | 0          | 1         | 1         |
| Gpatch8          | 1.43693   | 1.12852         | 0          | 1         | 1         |
| Ccdc43           | 0.573258  | 0.347018        | -0.724173  | 0.0424455 | 0.232829  |
| Gjc1             | 0.206533  | 0.07019         | -1.55704   | 0.0928445 | 0.374785  |
| Gjc1             | 0.127841  | 0.197804        | 0.629725   | 0.336785  | 0.677225  |
| Eftud2_j3        | 2.92519   | 1.98602         | 0          | 1         | 1         |
| Eftud2           | 7.54075   | 7.16458         | 0          | 1         | 1         |
| 1700023F06Rik_j1 | 0.526399  | 0.363738        | -0.533257  | 0.0737555 | 0.327316  |
| 1700023F06Rik_j4 | 1.1788    | 1.15167         | -0.0335947 | 0.922832  | 0.975936  |
| Map3k14_j4       | 0.738197  | 1.38743         | 0.910338   | 0.0066893 | 0.0635533 |
| Map3k14          | 1.13089   | 1.09244         | -0.0499022 | 0.81123   | 0.938053  |

|                  |          |           |            |           |          |
|------------------|----------|-----------|------------|-----------|----------|
| Arhgap27_j1      | 2.94304  | 1.1636    | 0          | 1         | 1        |
| Plekhn1          | 0.846552 | 0.749497  | 0          | 1         | 1        |
| Gosr2            | 2.00527  | 1.79789   | 0          | 1         | 1        |
| Gosr2_j2         | 0.296588 | 0.354708  | 0          | 1         | 1        |
| Nsf_j5           | 72.1572  | 74.0464   | 0          | 1         | 1        |
| Nsf              | 97.6414  | 83.7775   | 0          | 1         | 1        |
| 1700081L11Rik_j5 | 3.88644  | 3.97839   | 0          | 1         | 1        |
| 1700081L11Rik_j4 | 0.105072 | 0.253747  | 0          | 1         | 1        |
| 1700081L11Rik_j2 | 1.47891  | 1.02911   | 0          | 1         | 1        |
| Cdc27            | 3.10876  | 2.63221   | 0          | 1         | 1        |
| Cdc27            | 4.87046  | 4.34821   | 0          | 1         | 1        |
| Cyb561_j3        | 2.01029  | 1.53108   | 0          | 1         | 1        |
| Cyb561           | 3.11078  | 3.44819   | 0          | 1         | 1        |
| Limd2            | 2.04895  | 2.11125   | 0          | 1         | 1        |
| Strada           | 10.2199  | 7.69467   | 0          | 1         | 1        |
| Strada_j1        | 2.85104  | 3.8458    | 0          | 1         | 1        |
| Ccdc47           | 21.5523  | 21.4129   | 0          | 1         | 1        |
| Cd79b            | 0.149583 | 0.342392  | 1.1947     | 0.0430301 | 0.235227 |
| Scn4a_j1         | 0.54581  | 0.822061  | 0          | 1         | 1        |
| Scn4a_j2         | 0.973158 | 0.379234  | 0          | 1         | 1        |
| Icam2            | 0.987491 | 1.28471   | 0.379609   | 0.203636  | 0.547888 |
| Ern1             | 0.772424 | 1.0013    | 0          | 1         | 1        |
| Tex2_j1          | 15.85    | 21.8257   | 0          | 1         | 1        |
| Tex2_j2          | 1.00277  | 2.33865   | 0          | 1         | 1        |
| Tex2             | 27.7447  | 23.8546   | 0          | 1         | 1        |
| Pecam1_j2        | 0.641598 | 0.453021  | 0          | 1         | 1        |
| Pecam1           | 0.568629 | 0.271302  | 0          | 1         | 1        |
| Pecam1           | 0.32757  | 0.649118  | 0          | 1         | 1        |
| Pecam1           | 1.17542  | 0.928429  | 0          | 1         | 1        |
| Polg2            | 0.497639 | 0.541374  | 0.121524   | 0.794879  | 0.931484 |
| Polg2_j1         | 0.125768 | 0.0645781 | -0.961651  | 0.461556  | 1        |
| Ddx5_j2          | 24.3229  | 24.98     | 0          | 1         | 1        |
| Smurf2_j3        | 0.234057 | 0.111605  | 0          | 1         | 1        |
| Smurf2           | 0.760741 | 0.734397  | 0          | 1         | 1        |
| Bptf_j5          | 0.24188  | 0.243485  | 0.00954398 | 0.974545  | 0.992738 |
| Nol11            | 4.81714  | 5.13043   | 0.0909033  | 0.463084  | 0.763471 |
| Pitpnc1_j1       | 20.1534  | 13.3151   | 0          | 1         | 1        |
| Pitpnc1          | 16.8947  | 13.6667   | 0          | 1         | 1        |
| Cacng4           | 2.24468  | 1.89501   | -0.2443    | 0.172485  | 0.510021 |
| Cacng5           | 7.46064  | 7.07689   | -0.076184  | 0.49772   | 0.783786 |
| Prkca_j1         | 11.5147  | 7.49113   | 0          | 1         | 1        |
| Prkca_j2         | 0.268382 | 0.0223939 | 0          | 1         | 1        |
| Rgs9             | 1.92911  | 1.67057   | -0.207594  | 0.127925  | 0.445674 |
| Wipi1            | 3.28312  | 3.04772   | 0          | 1         | 1        |
| Fam20a_j2        | 1.61166  | 1.39535   | -0.207922  | 0.467438  | 0.766717 |
| Fam20a_j1        | 0.318337 | 0.271219  | -0.2311    | 0.63512   | 0.858471 |
| Abca8a           | 21.657   | 16.2232   | 0          | 1         | 1        |

|                  |           |           |              |           |           |
|------------------|-----------|-----------|--------------|-----------|-----------|
| Abca6            | 11.6382   | 7.77381   | -0.582176    | 5.44E-10  | 4.78E-08  |
| Abca5            | 8.29538   | 4.98302   | 0            | 1         | 1         |
| Abca5_j1         | 1.53422   | 0.696211  | 0            | 1         | 1         |
| XLOC_005302      | 0.0689872 | 0.0827111 | 0.261753     | 0.777976  | 1         |
| XLOC_005303      | 5.53E-05  | 0.0976314 | 10.7855      | 0.946181  | 1         |
| 2610035D17Rik_j2 | 1.84477   | 1.03214   | 0            | 1         | 1         |
| 2610035D17Rik    | 2.83358   | 2.97352   | 0            | 1         | 1         |
| 2610035D17Rik    | 1.8776    | 1.86532   | 0            | 1         | 1         |
| D11Wsu99e_j2     | 0.537535  | 0.978305  | 0            | 1         | 1         |
| Cdc42ep4         | 4.97794   | 6.1142    | 0            | 1         | 1         |
| Sdk2_j5          | 1.30677   | 1.7011    | 0.380466     | 0.0486765 | 0.254145  |
| Sdk2             | 0.312589  | 0.382756  | 0.292158     | 0.221005  | 0.568055  |
| AF251705         | 0.039046  | 0.110009  | 1.49437      | 0.283563  | 1         |
| MAIR-IIa         | 0.0241134 | 0.120621  | 2.32257      | 0.179562  | 1         |
| Nat9_j1          | 3.96942   | 3.64063   | -0.12474     | 0.545747  | 0.812617  |
| Nat9             | 5.85074   | 6.93309   | 0.24488      | 0.158151  | 0.492398  |
| Fdxr_j7          | 0.888794  | 0.943907  | 0            | 1         | 1         |
| Fdxr_j4          | 1.34449   | 0.95196   | 0            | 1         | 1         |
| Fdxr_j6          | 1.7519    | 1.42273   | 0            | 1         | 1         |
| Fads6_j1         | 0.943067  | 1.03012   | 0.127382     | 0.728032  | 0.903627  |
| Fads6            | 5.33346   | 4.53695   | -0.233349    | 0.144039  | 0.471055  |
| Ush1g            | 3.14216   | 2.83002   | -0.150946    | 0.290649  | 0.638061  |
| C630004H02Rik    | 16.1278   | 19.5381   | 0            | 1         | 1         |
| Nt5c             | 14.4102   | 15.6053   | 0.114945     | 0.262103  | 0.611283  |
| Hn1              | 90.6642   | 166.245   | 0.874702     | 0         | 0         |
| Gga3_j6          | 0.238489  | 0.520421  | 0            | 1         | 1         |
| Gga3_j7          | 0.1905    | 0.0669626 | 0            | 1         | 1         |
| Gga3_j8          | 0.176824  | 0.0660268 | 0            | 1         | 1         |
| Slc25a19         | 12.7506   | 13.3397   | 0            | 1         | 1         |
| Caskin2_j1       | 1.24074   | 1.0742    | 0            | 1         | 1         |
| Caskin2          | 3.2248    | 3.45934   | 0            | 1         | 1         |
| Recql5_j6        | 0.935892  | 0.118812  | -2.97766     | 0.0001388 | 0.0028136 |
| Recql5           | 3.46279   | 3.03359   | -0.190908    | 0.194521  | 0.536769  |
| Recql5_j7        | 0.398327  | 0.0662695 | -2.58754     | 0.0007291 | 0.0110887 |
| Galk1            | 2.6154    | 3.14758   | 0.267213     | 0.0610697 | 0.29158   |
| H3f3b_j3         | 0         | 0.0742194 | 1.79769e+308 | 0.0978397 | 1         |
| Unc13d_j1        | 0.357201  | 0.334216  | -0.0959548   | 0.847136  | 0.951638  |
| Unc13d_j10       | 0.112982  | 0.0500897 | -1.1735      | 0.202668  | 1         |
| Unc13d_j9        | 0.332294  | 0.449215  | 0.434946     | 0.187474  | 0.528396  |
| Wbp2_j1          | 0.925873  | 1.06882   | 0            | 1         | 1         |
| Wbp2             | 86.6368   | 75.2559   | 0            | 1         | 1         |
| Trim47_j2        | 0.970907  | 2.0104    | 1.05008      | 0.000982  | 0.0140902 |
| Trim47           | 0.672419  | 1.1787    | 0.80976      | 0.0008127 | 0.0121184 |
| Mrpl38           | 22.121    | 24.0494   | 0.120582     | 0.27557   | 0.624571  |
| Fbf1_j12         | 1.14694   | 2.16238   | 0            | 1         | 1         |
| Acox1            | 12.4052   | 11.1825   | 0            | 1         | 1         |
| Srp68_j3         | 9.66059   | 9.74299   | 0            | 1         | 1         |

|               |           |           |            |           |           |
|---------------|-----------|-----------|------------|-----------|-----------|
| Srp68         | 11.5924   | 11.5861   | 0          | 1         | 1         |
| Exoc7         | 0.0742244 | 0.0968954 | 0          | 1         | 1         |
| Exoc7_j7      | 0.047899  | 0         | 0          | 1         | 1         |
| Rnf157_j7     | 0.195968  | 0.0498087 | 0          | 1         | 1         |
| Prpsap1       | 14.4632   | 12.7739   | 0          | 1         | 1         |
| Ube2o_j2      | 0.404123  | 0.193745  | 0          | 1         | 1         |
| Ube2o         | 39.416    | 31.8203   | 0          | 1         | 1         |
| Rhbdf2_j2     | 0.434981  | 0.266081  | -0.709085  | 0.104884  | 0.402019  |
| Cygb          | 8.12564   | 4.74257   | 0          | 1         | 1         |
| Cygb_j1       | 12.814    | 8.26939   | 0          | 1         | 1         |
| St6galnac2_j5 | 0.219786  | 0.315114  | 0.519773   | 0.289089  | 0.63673   |
| St6galnac2    | 0.0390757 | 0.331009  | 3.08253    | 0.0034451 | 0.0384592 |
| Mxra7         | 10.7902   | 12.0347   | 0.157481   | 0.176092  | 0.514713  |
| Srsf2         | 16.977    | 14.7457   | -0.203286  | 0.052654  | 0.266519  |
| AK086245_j1   | 0.173146  | 0.15048   | -0.202414  | 0.798512  | 0.933125  |
| Tmc6          | 1.32224   | 1.28374   | 0          | 1         | 1         |
| Tmc6_j3       | 0.211063  | 0.0873387 | 0          | 1         | 1         |
| Tk1_j1        | 0.428218  | 0.339605  | -0.334488  | 0.219436  | 0.566003  |
| Tha1_j1       | 0.237059  | 0.286899  | 0.275295   | 0.700111  | 0.8896    |
| Tha1          | 1.75126   | 1.50735   | -0.216379  | 0.392743  | 0.718932  |
| Socs3_j1      | 1.98515   | 5.13107   | 0          | 1         | 1         |
| Socs3         | 1.05989   | 1.99486   | 0          | 1         | 1         |
| Socs3_j2      | 1.51766   | 1.38372   | 0          | 1         | 1         |
| XLOC_005363   | 0.586508  | 0.331275  | -0.82412   | 0.385426  | 0.714041  |
| XLOC_005363   | 0.882444  | 1.21059   | 0.456131   | 0.429405  | 0.742688  |
| XLOC_005363   | 0.357279  | 0.3027    | -0.239164  | 0.797628  | 0.932743  |
| Cyth1_j1      | 1.6031    | 2.50517   | 0          | 1         | 1         |
| Cyth1_j4      | 7.24025   | 4.91492   | 0          | 1         | 1         |
| Usp36_j1      | 0.377886  | 0.20308   | 0          | 1         | 1         |
| Usp36_j2      | 1.0666    | 0.606744  | 0          | 1         | 1         |
| Timp2         | 58.9353   | 47.8706   | 0          | 1         | 1         |
| Lgals3bp_j1   | 2.22004   | 2.04002   | -0.122005  | 0.507977  | 0.789986  |
| Cant1         | 5.00162   | 4.78457   | 0          | 1         | 1         |
| Cant1         | 5.19536   | 4.59151   | 0          | 1         | 1         |
| Cant1         | 2.92335   | 3.25215   | 0          | 1         | 1         |
| Rbfox3_j5     | 2.37891   | 5.69554   | 0          | 1         | 1         |
| Rbfox3_j2     | 4.256     | 3.99606   | 0          | 1         | 1         |
| Cbx8          | 1.99578   | 1.95857   | -0.0271574 | 0.868339  | 0.958268  |
| Cbx4          | 12.061    | 10.2486   | -0.234918  | 0.041889  | 0.231058  |
| Tbc1d16_j3    | 0.383901  | 0.451412  | 0          | 1         | 1         |
| Tbc1d16       | 1.31758   | 0.984995  | 0          | 1         | 1         |
| Tbc1d16_j4    | 0.327364  | 0.113932  | 0          | 1         | 1         |
| Eif4a3_j1     | 5.65336   | 6.2896    | 0.153858   | 0.325077  | 0.668265  |
| Sgsh          | 0.790625  | 0.793661  | 0.00553077 | 0.978245  | 0.993756  |
| Nptx1         | 8.27153   | 5.09035   | -0.700389  | 1.58E-10  | 1.54E-08  |
| XLOC_005382   | 0.154048  | 0.14591   | -0.0783057 | 0.8991    | 0.96767   |
| Aatk_j9       | 8.49697   | 8.74821   | 0          | 1         | 1         |

|                  |          |                 |           |           |           |
|------------------|----------|-----------------|-----------|-----------|-----------|
| Aatk             | 6.40651  | 3.72097         | 0         | 1         | 1         |
| Aatk             | 1.16071  | 0.148985        | 0         | 1         | 1         |
| Azi1             | 3.34743  | 3.98117         | 0.250137  | 0.0645121 | 0.301835  |
| 2410002I01Rik_j2 | 0.158445 | 0               | 0         | 1         | 1         |
| 2410002I01Rik    | 0.998409 | 1.03768         | 0         | 1         | 1         |
| Slc38a10_j7      | 0.115697 | 0.201526        | 0         | 1         | 1         |
| Slc38a10_j9      | 2.30503  | 2.32339         | 0         | 1         | 1         |
| Slc38a10         | 8.48111  | 8.77831         | 0         | 1         | 1         |
| Slc38a10_j8      | 1.98012  | 1.06927         | 0         | 1         | 1         |
| 2810410L24Rik_j4 | 0.195648 | 0.180116        | -0.119331 | 0.849541  | 0.952228  |
| AK013668         | 0.553112 | 0.494287        | -0.162221 | 0.700503  | 0.889857  |
| Nploc4_j1        | 6.13345  | 6.43071         | 0         | 1         | 1         |
| Fam195b          | 53.4959  | 58.131          | 0.119881  | 0.210898  | 0.555618  |
| P4hb_j3          | 0.622468 | 0.360421        | 0         | 1         | 1         |
| P4hb             | 10.7761  | 11.65           | 0         | 1         | 1         |
| Arhgdia_j1       | 0.365881 | 0.0744317       | 0         | 1         | 1         |
| Arhgdia          | 265.103  | 314.307         | 0         | 1         | 1         |
| Thoc4_j2         | 0.352505 | 0.398851        | 0.178208  | 0.536637  | 0.807022  |
| Thoc4            | 1.36186  | 1.38907         | 0.0285414 | 0.839207  | 0.948853  |
| Pcyt2_j8         | 0.667754 | 0.915387        | 0         | 1         | 1         |
| Sirt7_j12        | 0.362325 | 0.654974        | 0         | 1         | 1         |
| Pycr1            | 0.726922 | 1.05237         | 0         | 1         | 1         |
| Myadml2          | 0.583241 | 0.3184          | -0.873252 | 0.0536634 | 0.26987   |
| Notum_j1         | 0.134202 | 0.0437198       | -1.61805  | 0.109427  | 1         |
| Dcxr             | 0.170694 | 0.25959         | 0.604824  | 0.395702  | 0.720784  |
| Dcxr_j1          | 1.02269  | 1.07428         | 0.0709927 | 0.803741  | 0.934916  |
| Cbr2             | 1.96022  | 5.20013         | 1.40754   | 9.83E-12  | 1.20E-09  |
| Dus1l_j1         | 5.34721  | 5.23959         | 0         | 1         | 1         |
| Fasn_j3          | 0.131368 | 0.19435         | 0.565038  | 0.168138  | 0.504812  |
| Ccdc57_j4        | 0.104812 | 0.181004        | 0.788222  | 0.331977  | 0.673438  |
| Ccdc57_j8        | 0.287566 | 0.127746        | -1.17061  | 0.0628792 | 0.296948  |
| Ccdc57_j11       | 0.260555 | 0.0931573       | -1.48384  | 0.395835  | 0.720827  |
| Ccdc57_j12       | 0.179644 | 0.113199        | -0.666285 | 0.382483  | 0.712488  |
| Csnk1d           | 18.3298  | 18.3187         | 0         | 1         | 1         |
| Sectm1b          | 0.123975 | 0.557195        | 2.16814   | 0.001262  | 0.0172303 |
| Sectm1b          | 1.33117  | 2.73487         | 1.03878   | 9.06E-07  | 3.80E-05  |
| BC017643         | 8.05346  | 8.00464         | 0         | 1         | 1         |
| Wdr45l_j2        | 3.39021  | 1.78737         | 0         | 1         | 1         |
| Wdr45l_j1        | 15.9533  | 14.4129         | 0         | 1         | 1         |
| Wdr45l           | 3.3814   | 3.69139         | 0         | 1         | 1         |
| Rab40b           | 0.520615 | 0.966839        | 0.89306   | 0.005002  | 0.0507481 |
| Rab40b_j1        | 0.252418 | 0 -1.79769e+308 | 0.0001463 | 0.0001463 | 0.0029503 |
| Pisd-ps1_j2      | 1.88773  | 6.16855         | 0         | 1         | 1         |
| Eif4enif1_j1     | 0.126404 | 0.122677        | 0         | 1         | 1         |
| Eif4enif1_j3     | 2.1594   | 1.84775         | 0         | 1         | 1         |
| Patz1            | 3.70873  | 3.71438         | 0         | 1         | 1         |
| mazr_j4          | 1.7332   | 1.46905         | 0         | 1         | 1         |

|             |             |           |               |           |           |
|-------------|-------------|-----------|---------------|-----------|-----------|
| Pla2g3      | 6.02984     | 5.88772   | 0             | 1         | 1         |
| Pes1_j5     | 0           | 0.0614044 | 1.79769e+308  | 0.198653  | 1         |
| Gal3st1     | 1.41894     | 1.10966   | 0             | 1         | 1         |
| Gal3st1     | 2.88003     | 3.45392   | 0             | 1         | 1         |
| Ascc2_j6    | 2.67417     | 3.47276   | 0             | 1         | 1         |
| Zmat5       | 2.12869     | 3.2824    | 0.624785      | 0.0003227 | 0.0056848 |
| Ap1b1       | 44.3643     | 40.803    | 0             | 1         | 1         |
| Ap1b1_j1    | 8.61372     | 7.51129   | 0             | 1         | 1         |
| Ap1b1_j2    | 15.7953     | 17.8329   | 0             | 1         | 1         |
| XLOC_003916 | 0.0838965   | 0.0277836 | -1.59438      | 0.578884  | 1         |
| Dbnl_j1     | 0.0681758   | 0.0761782 | 0             | 1         | 1         |
| Aebp1       | 1.01825     | 1.3132    | 0.366993      | 0.0745726 | 0.329421  |
| Ogdh        | 26.6551     | 22.1872   | 0             | 1         | 1         |
| Ogdh_j6     | 25.3943     | 26.7087   | 0             | 1         | 1         |
| XLOC_003924 | 0.164207    | 0.147099  | 0             | 1         | 1         |
| Zmiz2_j6    | 2.69693     | 2.64184   | 0             | 1         | 1         |
| Zmiz2_j8    | 12.8532     | 14.1135   | 0             | 1         | 1         |
| Zmiz2_j13   | 1.47982     | 2.15179   | 0             | 1         | 1         |
| XLOC_003926 | 0.156804    | 0.104456  | -0.586068     | 0.531162  | 0.803433  |
| Ccm2        | 0.232292    | 0.266955  | 0             | 1         | 1         |
| Egfr_j3     | 0.0734479   | 0.314779  | 2.09954       | 0.148202  | 0.477037  |
| Ppp3r1_j1   | 1.29202     | 1.28889   | 0             | 1         | 1         |
| Ppp3r1_j2   | 27.9569     | 31.0666   | 0             | 1         | 1         |
| Spred2_j1   | 1.7998      | 1.1459    | 0             | 1         | 1         |
| Tmem17_j2   | 3.26592     | 3.08241   | -0.0834345    | 0.737105  | 0.907482  |
| Cct4        | 39.7055     | 43.9344   | 0             | 1         | 1         |
| Fam161a_j2  | 0.294161    | 0.293921  | -0.00117804   | 0.997996  | 0.999228  |
| Xpo1_j2     | 6.05703     | 6.58751   | 0             | 1         | 1         |
| Xpo1_j8     | 6.2551      | 7.61175   | 0             | 1         | 1         |
| Usp34_j4    | 0.220385    | 0.257116  | 0.222396      | 0.782103  | 0.926378  |
| Usp34_j5    | 1.21761     | 1.2179    | 0.000334492   | 1         | 1         |
| Pus10       | 1.0967      | 0.73749   | 0             | 1         | 1         |
| Bcl11a      | 0.323551    | 0.0378622 | -3.09516      | 0.0467858 | 0.248134  |
| Bcl11a_j1   | 0.060581    | 0         | -1.79769e+308 | 0.0814973 | 1         |
| Gm12082_j1  | 0.0334568   | 0.0960852 | 1.52201       | 0.500687  | 1         |
| Efemp1_j1   | 1.45868     | 1.67336   | 0.198086      | 0.531876  | 0.80382   |
| Smek2_j1    | 1.88111     | 1.93509   | 0.040811      | 0.77393   | 0.923306  |
| Mtif2_j2    | 1.58108     | 1.17547   | 0             | 1         | 1         |
| Mtif2_j4    | 0.000157669 | 0.162496  | 0             | 1         | 1         |
| Gm8098_j1   | 0           | 0.292342  | 1.79769e+308  | 0.0065323 | 0.0624382 |
| XLOC_003978 | 0.0597061   | 0.118399  | 0.98771       | 0.67855   | 1         |
| XLOC_003980 | 0.124602    | 0.0861397 | -0.532578     | 0.630502  | 1         |
| Sh3pxd2b_j4 | 1.30993     | 1.52786   | 0             | 1         | 1         |
| Stk10_j2    | 0.0857077   | 0.0517737 | -0.727206     | 0.385611  | 1         |
| Kcnmb1      | 31.9599     | 21.6753   | -0.560214     | 5.35E-07  | 2.40E-05  |
| XLOC_004009 | 0           | 0.078456  | 1.79769e+308  | 0.0949754 | 1         |
| C1qtnf2_j1  | 0.353804    | 0.439903  | 0.314237      | 0.618297  | 0.850061  |

|               |             |                 |            |           |          |
|---------------|-------------|-----------------|------------|-----------|----------|
| Pwvwp2a       | 0.573097    | 0.619163        | 0.111539   | 0.714888  | 0.896766 |
| Rnf145_j1     | 1.19647     | 1.13005         | 0          | 1         | 1        |
| Trim7_j2      | 0.340461    | 0.243048        | 0          | 1         | 1        |
| Trim7_j1      | 0.30442     | 0.302146        | 0          | 1         | 1        |
| Olf1r56_j1    | 0.960235    | 0.607401        | -0.660739  | 0.113826  | 0.419484 |
| Mapk9_j4      | 0.309182    | 3.6112          | 0          | 1         | 1        |
| Rasgef1c_j2   | 0.0557074   | 0 -1.79769e+308 |            | 1         | 1        |
| Hnrnp1        | 34.5902     | 36.7003         | 0.0854302  | 0.381272  | 0.711819 |
| Adamts2_j4    | 0.139001    | 0.13621         | -0.0292696 | 0.965494  | 0.990079 |
| Clk4_j8       | 1.90501     | 1.29888         | 0          | 1         | 1        |
| Agxt2l2_j5    | 3.42263     | 3.60568         | 0.0751681  | 0.646207  | 0.863593 |
| Ppp2ca_j3     | 0.649847    | 0.38435         | 0          | 1         | 1        |
| Skp1a_j4      | 211.25      | 266.624         | 0          | 1         | 1        |
| Skp1a_j5      | 452.594     | 444.224         | 0          | 1         | 1        |
| Vdac1_j7      | 99.6644     | 114.546         | 0          | 1         | 1        |
| Shroom1_j3    | 0.117221    | 0.138939        | 0.245218   | 0.707469  | 1        |
| Sept8_j5      | 14.4966     | 13.0568         | -0.150914  | 0.268423  | 0.617271 |
| Kif3a_j4      | 16.2998     | 13.4843         | 0          | 1         | 1        |
| Irf1_j2       | 4.49192     | 3.74654         | -0.261774  | 0.171141  | 0.507955 |
| P4ha2_j1      | 0.0441728   | 0.681108        | 0          | 1         | 1        |
| G3bp1_j5      | 0.273944    | 0.120893        | 0          | 1         | 1        |
| Mfap3         | 1.95612     | 1.93696         | 0          | 1         | 1        |
| Larp1_j3      | 0.0786724   | 0.112365        | 0          | 1         | 1        |
| Cnot8_j1      | 0.419117    | 0.000909904     | 0          | 1         | 1        |
| Mrpl22_j1     | 4.17557     | 5.026           | 0.267435   | 0.52631   | 0.801005 |
| Mrpl22_j2     | 0.824957    | 0.370106        | -1.15638   | 0.121522  | 0.434092 |
| Irgm2_j1      | 0.940136    | 0.568604        | 0          | 1         | 1        |
| Igtp_j1       | 10.5001     | 7.72502         | 0          | 1         | 1        |
| Igtp_j4       | 0.752855    | 2.10839         | 0          | 1         | 1        |
| Igtp_j6       | 0.419337    | 0.440254        | 0          | 1         | 1        |
| Zfp692-ps_j6  | 0.0769327   | 0.0654786       | -0.232572  | 0.751298  | 1        |
| Zfp692-ps     | 0.0719273   | 0.0443782       | -0.696689  | 0.432415  | 1        |
| Zfp692-ps_j5  | 0.000221244 | 0.164655        | 9.53959    | 0.50978   | 0.790859 |
| Sh3bp5l       | 2.08024     | 1.92609         | 0          | 1         | 1        |
| 4933439C10Rik | 2.00722     | 2.03995         | 0          | 1         | 1        |
| Rai1          | 1.06966     | 0.764486        | -0.484587  | 0.017529  | 0.128505 |
| Rai1_j3       | 4.67916     | 5.15525         | 0.139794   | 0.594379  | 0.838496 |
| Drg2          | 25.6538     | 27.2724         | 0.08827    | 0.381847  | 0.712127 |
| Myo15_j5      | 0.0672527   | 0 -1.79769e+308 |            | 0.0153058 | 1        |
| Myo15_j8      | 0.107132    | 0 -1.79769e+308 |            | 0.0055926 | 1        |
| Myo15_j13     | 0.0661457   | 0 -1.79769e+308 |            | 0.0378591 | 1        |
| Myo15_j14     | 0.2867      | 0.0771779       | -1.89328   | 0.0955166 | 0.381511 |
| Llg1_j3       | 0.072753    | 0.0381563       | -0.931085  | 0.460043  | 1        |
| Dhrs7b_j1     | 7.33806     | 6.56207         | -0.161248  | 0.506223  | 0.788746 |
| Dhrs7b        | 0.0863543   | 0.166514        | 0.947299   | 0.101713  | 0.395032 |
| Map2k3_j2     | 1.56942     | 1.11463         | -0.493672  | 0.129952  | 0.44894  |
| Tnfrsf13b_j1  | 0.362696    | 0.257647        | -0.493365  | 0.286132  | 0.634849 |



|                  |           |                       |            |           |           |
|------------------|-----------|-----------------------|------------|-----------|-----------|
| B9d1_j4          | 2.55511   | 2.48087               | -0.0425373 | 0.895213  | 0.966918  |
| B9d1_j6          | 0.450405  | 0.249853              | -0.85014   | 0.416612  | 0.733896  |
| Specc1           | 0.782718  | 0.648656              | 0          | 1         | 1         |
| Pigl             | 1.20164   | 0.912309              | 0          | 1         | 1         |
| Pigl_j1          | 1.54856   | 1.60842               | 0          | 1         | 1         |
| 2410006H16Rik_j1 | 0.348077  | 0.950477              | 1.44924    | 0.0004982 | 0.0081195 |
| Mmgt2            | 1.31862   | 1.60518               | 0.283702   | 0.381276  | 0.711819  |
| Fbxw10_j6        | 0.138215  | 0.029604              | -2.22305   | 0.246999  | 0.594488  |
| Pmp22_j2         | 123.169   | 129.099               | 0          | 1         | 1         |
| 2810001G20Rik    | 2.14273   | 2.40822               | 0.16852    | 0.473853  | 0.770243  |
| Elac2_j1         | 0.585824  | 1.44106               | 0          | 1         | 1         |
| Elac2_j4         | 0.715711  | 0.959787              | 0          | 1         | 1         |
| Pirt_j3          | 118.481   | 105.483               | 0          | 1         | 1         |
| Pirt_j4          | 36.3246   | 44.4641               | 0          | 1         | 1         |
| 9130409J20Rik_j5 | 0.271257  | 0.267855              | -0.0182077 | 0.976467  | 0.993154  |
| Myh8_j1          | 0.232981  | 0.11583               | -1.0082    | 0.41939   | 0.736103  |
| Pik3r5_j2        | 0.171983  | 0.199512              | 0.214212   | 0.714147  | 0.896527  |
| Myh10_j3         | 0.0631695 | 0.209885              | 0          | 1         | 1         |
| Rpl26            | 0.268787  | 0.345397              | 0.36179    | 0.420634  | 0.736821  |
| Rpl26_j2         | 32.2473   | 38.4813               | 0.254977   | 0.100663  | 0.392857  |
| Slc25a35_j1      | 0.505055  | 0.56926               | 0          | 1         | 1         |
| 1500010J02Rik_j6 | 0         | 0.36297               | 0          | 1         | 1         |
| 1500010J02Rik    | 0.613778  | 1.68216               | 0          | 1         | 1         |
| Tmem107_j3       | 2.83451   | 3.19408               | 0.172302   | 0.593239  | 0.83794   |
| Vamp2_j2         | 34.6771   | 37.7575               | 0          | 1         | 1         |
| Per1_j7          | 0.249573  | 0.109222              | -1.1922    | 0.236638  | 0.583799  |
| Alox12b_j1       | 0.131022  | 0.0693567             | -0.917702  | 0.569955  | 1         |
| Trp53_j3         | 0.200065  | 0.20603               | 0.0423861  | 0.945164  | 0.983703  |
| Trp53_j7         | 0.0370024 | 0.260107              | 2.81341    | 0.0807304 | 0.345869  |
| Sat2_j2          | 0.160882  | 0.212461              | 0.401198   | 0.584124  | 0.833298  |
| Zbtb4_j2         | 3.69839   | 3.49792               | 0          | 1         | 1         |
| 1810027O10Rik    | 68.1692   | 91.2877               | 0.4213     | 0.0002626 | 0.0048012 |
| Plscr3           | 20.4193   | 25.9296               | 0          | 1         | 1         |
| Plscr3_j1        | 1.17453   | 1.88376               | 0          | 1         | 1         |
| Neur14_j2        | 1.09298   | 0.853756              | -0.356377  | 0.176672  | 0.515572  |
| Gps2_j3          | 2.31522   | 2.46417               | 0          | 1         | 1         |
| Ybx2_j2          | 0.220328  | 0.0987684             | -1.15753   | 0.228596  | 0.575633  |
| Ybx2_j5          | 0.040086  | 0.0868561             | 1.11553    | 0.356668  | 1         |
| Ctdnep1_j3       | 0.0739867 | 0 -1.79769e+308       |            | 0.0013377 | 1         |
| Gabarap_j1       | 2.32183   | 0 -1.79769e+308       |            | 2.44E-05  | 0.000649  |
| Phf23            | 4.24374   | 5.48757               | 0.370833   | 0.0494342 | 0.256513  |
| Phf23            | 1.5833    | 1.43184               | -0.14507   | 0.613232  | 0.847467  |
| Phf23            | 0.741423  | 0.450153              | -0.719882  | 0.16219   | 0.497506  |
| Dlg4_j4          | 1.1329    | 0.563679              | 0          | 1         | 1         |
| Dlg4_j7          | 0.413258  | 0.89298               | 0          | 1         | 1         |
| Asgr2_j1         | 0.0263373 | 0.112893              | 2.09977    | 0.118266  | 1         |
| Mgl2             | 0         | 0.176994 1.79769e+308 |            | 0.0150082 | 0.115008  |

|                  |           |             |              |           |           |
|------------------|-----------|-------------|--------------|-----------|-----------|
| Clec10a_j2       | 0.16451   | 0.310536    | 0.916588     | 0.23913   | 0.586263  |
| Slc16a11_j3      | 0.0206908 | 0.0491831   | 1.24917      | 0.514639  | 1         |
| Arrb2            | 4.39671   | 5.06664     | 0            | 1         | 1         |
| Med11_j1         | 0.212667  | 0.336825    | 0.663401     | 0.234655  | 0.582023  |
| Zmynd15_j1       | 0.314289  | 0.712355    | 1.1805       | 0.0035266 | 0.0391716 |
| Zmynd15_j3       | 0.284638  | 0.459718    | 0.691617     | 0.272452  | 0.621347  |
| Psmb6_j1         | 0.663723  | 0.47373     | -0.486516    | 0.553886  | 0.817269  |
| Pld2_j1          | 0.0172676 | 0.0765123   | 2.14762      | 0.127944  | 1         |
| Pld2_j9          | 0.663167  | 0.668838    | 0.0122842    | 0.971817  | 0.991962  |
| Pld2_j10         | 0.144813  | 0.000197922 | -9.51504     | 0.811045  | 0.938047  |
| Mink1_j4         | 2.88637   | 2.76048     | -0.0643345   | 0.703715  | 0.891518  |
| Mink1_j3         | 0.743442  | 0.692654    | -0.102086    | 0.722943  | 0.901338  |
| Fam64a_j1        | 0         | 0.11504     | 1.79769e+308 | 0.0924941 | 1         |
| Txndc17_j1       | 21.9562   | 32.549      | 0.567983     | 7.13E-06  | 0.000231  |
| Xaf1_j5          | 1.59254   | 1.98535     | 0.318064     | 0.484232  | 0.776316  |
| Ube2g1_j2        | 2.97002   | 2.71308     | 0            | 1         | 1         |
| Ankfy1_j1        | 8.29986   | 8.68675     | 0.0657302    | 0.506517  | 0.788992  |
| Camkk1_j3        | 2.67899   | 3.22746     | 0            | 1         | 1         |
| P2rx5            | 0.39162   | 0.359972    | 0            | 1         | 1         |
| 1300001I01Rik    | 3.05292   | 2.46745     | -0.30717     | 0.0811678 | 0.346859  |
| Mnt_j3           | 9.61126   | 11.4213     | 0            | 1         | 1         |
| Smg6_j4          | 0         | 0.114719    | 0            | 1         | 1         |
| Rtn4rl1_j3       | 8.69774   | 8.87031     | 0            | 1         | 1         |
| XLOC_004233      | 0.110644  | 0.134067    | 0            | 1         | 1         |
| Smyd4            | 0.516605  | 0.399217    | 0            | 1         | 1         |
| Smyd4            | 1.7993    | 1.58707     | 0            | 1         | 1         |
| Smyd4_j2         | 1.15254   | 2.73791     | 0            | 1         | 1         |
| Rilp_j1          | 0.0946317 | 0.0811222   | -0.222226    | 0.851046  | 1         |
| Scarf1_j4        | 0.0588178 | 0.0937416   | 0.672435     | 0.585285  | 1         |
| Slc43a2_j3       | 7.55915   | 6.50081     | -0.217605    | 0.138991  | 0.463607  |
| Pitpna_j7        | 51.6755   | 52.9703     | 0            | 1         | 1         |
| Inpp5k           | 6.67112   | 6.07156     | 0            | 1         | 1         |
| Crk              | 6.45933   | 5.4883      | 0            | 1         | 1         |
| Rnmtl1           | 3.20138   | 3.27038     | 0.0307653    | 0.851529  | 0.952852  |
| Tusc5_j1         | 94.6871   | 69.128      | 0            | 1         | 1         |
| Ssh2_j4          | 0.279122  | 0.614454    | 0            | 1         | 1         |
| 2210008F06Rik_j1 | 0.24074   | 0           | 0            | 1         | 1         |
| 2210008F06Rik    | 0.298511  | 1.22176     | 0            | 1         | 1         |
| Abhd15           | 0.324653  | 0.258874    | -0.326647    | 0.397033  | 0.721465  |
| Nufip2           | 2.18006   | 0.738805    | -1.5611      | 2.22E-16  | 5.36E-14  |
| Myo18a_j2        | 0.797143  | 2.11701     | 0            | 1         | 1         |
| Myo18a_j7        | 4.25608   | 4.91984     | 0            | 1         | 1         |
| Sez6_j2          | 0.813133  | 0.000624181 | 0            | 1         | 1         |
| Flot2            | 50.0103   | 54.7715     | 0            | 1         | 1         |
| Flot2_j8         | 42.7213   | 50.2722     | 0            | 1         | 1         |
| Flot2_j10        | 28.3376   | 27.6021     | 0            | 1         | 1         |
| Proca1_j3        | 0.118732  | 0.0893963   | -0.409423    | 0.746829  | 1         |

|                  |           |           |              |           |           |
|------------------|-----------|-----------|--------------|-----------|-----------|
| Proca1_j5        | 0.545153  | 0.583652  | 0.0984476    | 0.816116  | 0.940221  |
| 2610507B11Rik_j2 | 12.2906   | 10.1192   | 0            | 1         | 1         |
| Vtn              | 3.40985   | 5.24642   | 0.621624     | 0.0002088 | 0.0039788 |
| Poldip2          | 9.39177   | 8.46303   | 0            | 1         | 1         |
| Poldip2_j1       | 8.2525    | 10.0865   | 0            | 1         | 1         |
| Zfp207_j3        | 5.83343   | 7.1641    | 0            | 1         | 1         |
| Zfp207           | 9.0453    | 12.0192   | 0            | 1         | 1         |
| Cdk5r1           | 12.0178   | 10.7132   | 0            | 1         | 1         |
| Gm11419_j4       | 0.138447  | 0.0987308 | -0.487757    | 0.39521   | 0.720391  |
| XLOC_004300      | 0.412461  | 0.288021  | -0.518084    | 0.174132  | 0.512143  |
| XLOC_004306      | 0.117943  | 0.0831595 | -0.504138    | 0.739606  | 1         |
| XLOC_004307      | 0.167311  | 0.124301  | -0.428696    | 0.581423  | 0.83232   |
| Tmem132e_j4      | 0.0829351 | 0.0256849 | 0            | 1         | 1         |
| XLOC_004308      | 0.0920994 | 0.0364801 | 0            | 1         | 1         |
| XLOC_004309      | 0.100108  | 0.024958  | -2.00399     | 0.202525  | 1         |
| Lig3             | 0.986295  | 1.33298   | 0.434566     | 0.019482  | 0.138412  |
| Lig3             | 0.0669603 | 0.173022  | 1.36958      | 0.0028304 | 0.032893  |
| Unc45b_j3        | 0.0676169 | 0.0560159 | -0.271547    | 0.831449  | 1         |
| Unc45b_j6        | 0.240307  | 0.576079  | 1.26139      | 0.0190057 | 0.136135  |
| AA465934_j2      | 0.353114  | 0.407384  | 0.206258     | 0.761128  | 0.917801  |
| Ap2b1_j2         | 0.246392  | 0.426284  | 0.790861     | 0.0290323 | 0.181537  |
| Rasl10b_j1       | 0.130917  | 0.437777  | 0            | 1         | 1         |
| Taf15_j5         | 0         | 0.801168  | 1.79769e+308 | 9.00E-06  | 0.0002837 |
| Taf15_j4         | 0.273783  | 0.158388  | -0.78957     | 0.332861  | 0.674     |
| Taf15_j6         | 0.314547  | 0.37679   | 0.260485     | 0.655342  | 0.868271  |
| Taf15_j11        | 7.41417   | 8.22459   | 0.149658     | 0.521689  | 0.798357  |
| Heatr6           | 0.959754  | 1.24211   | 0            | 1         | 1         |
| Ddx52_j1         | 0.240844  | 0.728219  | 0            | 1         | 1         |
| Ddx52_j2         | 2.2978    | 2.5642    | 0            | 1         | 1         |
| Acaca_j16        | 0.0650801 | 0.0338286 | -0.943972    | 0.554303  | 1         |
| Myo19_j1         | 0.341237  | 0.298863  | -0.191288    | 0.780539  | 0.925851  |
| Myo19_j2         | 0.475485  | 0.491696  | 0.0483658    | 0.898061  | 0.967557  |
| Myo19_j3         | 0.809352  | 0.941105  | 0.217589     | 0.446642  | 0.753433  |
| XLOC_004337      | 0.0913867 | 0.0694242 | -0.396546    | 0.703626  | 1         |
| Ppm1d_j1         | 0.677815  | 0.654787  | -0.0498675   | 0.91336   | 0.972756  |
| Bcas3_j6         | 6.47751   | 5.17152   | 0            | 1         | 1         |
| Sept4_j2         | 0         | 0.950797  | 1.79769e+308 | 4.58E-05  | 0.0011062 |
| Mtmr4_j1         | 0         | 0.242931  | 0            | 1         | 1         |
| Mks1_j5          | 0.171216  | 0.145425  | -0.235547    | 0.754499  | 0.915367  |
| Cuedc1_j3        | 2.19357   | 2.16347   | -0.0199344   | 0.915989  | 0.973828  |
| AK021127_j2      | 0         | 0.085911  | 1.79769e+308 | 0.200302  | 1         |
| Trim25_j1        | 0.136568  | 0.185169  | 0.43922      | 0.398713  | 0.722617  |
| Tmem100          | 2.635     | 2.95691   | 0.166291     | 0.427692  | 0.741858  |
| Spag9            | 7.25375   | 5.99095   | -0.275942    | 0.0151974 | 0.116007  |
| Spag9_j6         | 25.3595   | 22.668    | -0.161869    | 0.071835  | 0.322325  |
| Mrpl27_j1        | 0.287504  | 0.489614  | 0.768061     | 0.0866268 | 0.359714  |
| Mrpl27_j4        | 8.91395   | 7.97445   | -0.160679    | 0.190825  | 0.533094  |

|                  |           |           |               |           |           |
|------------------|-----------|-----------|---------------|-----------|-----------|
| Samd14           | 2.20019   | 1.70524   | -0.367658     | 0.160687  | 0.495357  |
| Samd14_j5        | 2.39594   | 1.14778   | -1.06175      | 0.0085315 | 0.0760996 |
| Fam117a_j2       | 0         | 0.279496  | 1.79769e+308  | 0.0018859 | 0.0238391 |
| Gngt2_j1         | 0.0815214 | 0.138114  | 0.760606      | 0.518305  | 1         |
| Snf8             | 0.625222  | 0.545705  | -0.196246     | 0.774259  | 0.923528  |
| Ttl6_j7          | 0.0559851 | 0.080199  | 0.518542      | 0.590676  | 1         |
| Hoxb9_j4         | 1.0843    | 0.64943   | -0.739517     | 0.0447915 | 0.241817  |
| Hoxb7            | 4.33082   | 4.73967   | 0.130147      | 0.434436  | 0.74554   |
| Hoxb5_j1         | 2.96222   | 2.43058   | -0.285378     | 0.239271  | 0.586542  |
| Hoxb3_j2         | 0.350254  | 0.332754  | -0.0739467    | 0.890506  | 0.965381  |
| Hoxb5_j3         | 7.06555   | 6.69664   | -0.0773641    | 0.668679  | 0.874576  |
| Skap1_j5         | 0         | 0.0740126 | 1.79769e+308  | 0.177397  | 1         |
| Cbx1_j2          | 1.87023   | 1.5613    | 0             | 1         | 1         |
| Cbx1_j1          | 0.797257  | 0.446468  | 0             | 1         | 1         |
| Prr15l           | 0.0920629 | 0.0626817 | -0.554575     | 0.660264  | 1         |
| D030028A08Rik_j2 | 0.171417  | 0.198896  | 0.214499      | 0.654779  | 0.868161  |
| Arhgap23_j2      | 0.486593  | 0.516514  | 0             | 1         | 1         |
| Arhgap23_j5      | 0.554014  | 0.857533  | 0             | 1         | 1         |
| Mllt6_j4         | 0         | 0.169968  | 0             | 1         | 1         |
| Psm3_j1          | 0.444238  | 0.34234   | -0.375901     | 0.626237  | 0.854124  |
| Psm3_j3          | 0.873779  | 0.862687  | -0.0184308    | 0.970943  | 0.991858  |
| Psm3_j4          | 0.0903853 | 0.0624888 | -0.532492     | 0.757991  | 1         |
| XLOC_004427      | 1.777     | 1.34763   | -0.399024     | 0.0831078 | 0.351298  |
| AK141527         | 1.39081   | 1.62751   | 0             | 1         | 1         |
| Ppp1r1b_j1       | 0.112415  | 0         | -1.79769e+308 | 0.0423075 | 1         |
| Stard3_j2        | 0.913678  | 1.01426   | 0.150666      | 0.706769  | 0.893134  |
| Erb2_j1          | 0.0882782 | 0.0733476 | 0             | 1         | 1         |
| Gsdma_j1         | 0.294206  | 0.569604  | 0.953133      | 0.107679  | 0.407901  |
| Thra_j3          | 1.20818   | 2.04302   | 0.757863      | 0.0403559 | 0.225129  |
| Casc3_j3         | 12.8292   | 15.6958   | 0             | 1         | 1         |
| Wipf2_j4         | 0.484127  | 0.462356  | 0             | 1         | 1         |
| Igfbp4           | 25.6231   | 22.6661   | 0             | 1         | 1         |
| Igfbp4_j2        | 38.2689   | 39.9382   | 0             | 1         | 1         |
| Ttc25_j2         | 0.27512   | 0.374227  | 0.443853      | 0.344328  | 0.684009  |
| Nkiras2_j1       | 0.872599  | 0.0406871 | -4.42268      | 0.134918  | 0.457099  |
| Atp6v0a1         | 49.7528   | 48.1228   | 0             | 1         | 1         |
| Atp6v0a1_j2      | 40.1666   | 54.5408   | 0             | 1         | 1         |
| Atp6v0a1_j3      | 12.7399   | 12.7579   | 0             | 1         | 1         |
| Hsd17b1_j2       | 0.136293  | 0.0674759 | -1.01427      | 0.280716  | 1         |
| Mlx              | 4.08022   | 4.1109    | 0             | 1         | 1         |
| Tubg2_j2         | 24.3275   | 22.678    | -0.101291     | 0.482936  | 0.77583   |
| Cntnap1_j3       | 12.4064   | 11.0986   | 0             | 1         | 1         |
| Psme3_j1         | 0.733817  | 0.424603  | -0.789305     | 0.0061649 | 0.0598306 |
| Aoc3             | 0.0751493 | 0.186818  | 1.3138        | 0.0253516 | 0.165919  |
| Aoc3_j3          | 0.0992137 | 9.48E-06  | -13.3531      | 0.989097  | 1         |
| Ifi35_j1         | 12.2068   | 16.206    | 0             | 1         | 1         |
| Nbr1             | 1.05283   | 0.91043   | 0             | 1         | 1         |

|             |            |           |              |           |           |
|-------------|------------|-----------|--------------|-----------|-----------|
| Nbr1        | 7.53538    | 6.01969   | 0            | 1         | 1         |
| Rpl27-ps2   | 0.577401   | 0.433621  | -0.413137    | 0.484006  | 0.77621   |
| Cd300lg_j2  | 0.323726   | 0.306258  | -0.0800242   | 0.900148  | 0.968242  |
| G6pc3       | 47.9813    | 46.5085   | -0.0449777   | 0.637272  | 0.859508  |
| Rundc3a_j10 | 35.0325    | 46.3313   | 0            | 1         | 1         |
| Gm16342_j1  | 0.00241615 | 0.301439  | 6.96301      | 0.44964   | 0.755708  |
| Adam11_j9   | 1.01204    | 0.838864  | 0            | 1         | 1         |
| Adam11_j8   | 1.0641     | 0         | 0            | 1         | 1         |
| Adam11_j14  | 9.93647    | 9.03936   | 0            | 1         | 1         |
| Higd1b      | 0.511986   | 0.568537  | 0.151149     | 0.687335  | 0.883817  |
| Nmt1_j5     | 6.78244    | 10.2838   | 0            | 1         | 1         |
| Acbd4_j4    | 1.78031    | 2.15316   | 0            | 1         | 1         |
| XLOC_004496 | 0.1547     | 0.274398  | 0.826799     | 0.201116  | 0.544463  |
| Hexim2_j1   | 0          | 0.138449  | 1.79769e+308 | 0.0042652 | 1         |
| Fmn1_j9     | 0          | 0.271063  | 1.79769e+308 | 0.0028693 | 0.0332346 |
| Mettl2_j2   | 0.107708   | 0.0947764 | -0.184527    | 0.839684  | 1         |
| Mettl2      | 2.39474    | 2.53774   | 0.0836784    | 0.670396  | 0.875338  |
| Mettl2_j10  | 1.37707    | 2.0257    | 0.556823     | 0.0420862 | 0.231851  |
| Tlk2_j7     | 0          | 0.128172  | 1.79769e+308 | 0.0382598 | 1         |
| Mrc2_j6     | 0.285058   | 0.435767  | 0.612301     | 0.124687  | 0.439929  |
| Tanc2_j3    | 0.820201   | 0.508931  | -0.688509    | 0.221626  | 0.568841  |
| Tanc2_j6    | 0.174042   | 0.107831  | -0.690661    | 0.118492  | 0.428543  |
| Kcnh6_j2    | 0.95805    | 0.596442  | -0.68372     | 0.0351135 | 0.206175  |
| Dcaf7_j1    | 6.19952    | 5.51268   | -0.169403    | 0.321933  | 0.664958  |
| Taco1_j1    | 2.83505    | 4.11444   | 0.537321     | 0.0053909 | 0.0537202 |
| Psmc5       | 5.96225    | 5.93434   | 0            | 1         | 1         |
| Psmc5_j4    | 74.645     | 71.0258   | 0            | 1         | 1         |
| Helz_j10    | 0.503106   | 0.769023  | 0            | 1         | 1         |
| Arsg_j2     | 0.254348   | 0.185201  | 0            | 1         | 1         |
| Arsg_j3     | 1.89578    | 1.1989    | 0            | 1         | 1         |
| Prkar1a_j1  | 26.4262    | 24.7465   | -0.0947489   | 0.363917  | 0.698052  |
| Map2k6_j1   | 1.39218    | 1.07604   | -0.37162     | 0.166096  | 0.502787  |
| Cog1_j4     | 13.0307    | 13.3673   | 0            | 1         | 1         |
| Cog1_j5     | 0          | 0.506022  | 0            | 1         | 1         |
| XLOC_004541 | 0.118747   | 0.0348972 | -1.76671     | 0.46739   | 1         |
| Rpl38_j2    | 0          | 0.242839  | 1.79769e+308 | 0.006608  | 0.0629524 |
| Rpl38_j8    | 0.394541   | 0.301827  | -0.38645     | 0.505298  | 0.788165  |
| Dnaic2      | 0.0148845  | 0.373053  | 0            | 1         | 1         |
| Dnaic2_j3   | 0          | 0.0805058 | 0            | 1         | 1         |
| XLOC_004545 | 0.154869   | 0.149836  | -0.0476675   | 0.952856  | 0.986353  |
| Gprc5c_j2   | 2.46587    | 1.99286   | 0            | 1         | 1         |
| Gprc5c_j5   | 0          | 0.156141  | 0            | 1         | 1         |
| Gprc5c_j6   | 5.79437    | 4.18188   | 0            | 1         | 1         |
| Gprc5c_j8   | 2.41532    | 2.38066   | 0            | 1         | 1         |
| Cd300a_j3   | 0.0821673  | 0.0605174 | 0            | 1         | 1         |
| Cd300a_j5   | 0.188314   | 0.509789  | 0            | 1         | 1         |
| XLOC_004553 | 0.10894    | 0.0758101 | -0.523076    | 0.552192  | 1         |

|                  |           |           |              |           |          |
|------------------|-----------|-----------|--------------|-----------|----------|
| Mrps7            | 2.90133   | 3.36172   | 0            | 1         | 1        |
| 2310067B10Rik_j6 | 0         | 0.333037  | 0            | 1         | 1        |
| 2310067B10Rik_j7 | 0.471416  | 0.147281  | 0            | 1         | 1        |
| Tsen54_j2        | 0.236855  | 0.238437  | 0.0095989    | 0.990023  | 0.996938 |
| Tsen54_j1        | 0         | 0.205066  | 1.79769e+308 | 0.016477  | 0.122919 |
| 1110017F19Rik    | 0.270801  | 0.236013  | -0.198369    | 0.643965  | 0.862786 |
| Sap30bp_j1       | 0.793564  | 1.1745    | 0.565627     | 0.0310677 | 0.190042 |
| Itgb4_j7         | 0.295744  | 0.504994  | 0.771919     | 0.0631905 | 0.298055 |
| Unk              | 2.20937   | 2.33093   | 0            | 1         | 1        |
| Unk_j1           | 1.29595   | 1.41722   | 0            | 1         | 1        |
| Cdk3_j3          | 2.15698   | 2.1998    | 0            | 1         | 1        |
| Sphk1_j2         | 1.39795   | 1.07261   | -0.382179    | 0.0623676 | 0.295598 |
| 1810032O08Rik_j2 | 0.157069  | 0.16578   | 0.0778754    | 0.945854  | 0.983787 |
| 1110005A03Rik_j2 | 11.2072   | 10.649    | -0.0737044   | 0.526613  | 0.801166 |
| Mgat5b_j2        | 0.600331  | 0.396654  | -0.597877    | 0.288267  | 0.636106 |
| Mgat5b_j5        | 1.57725   | 1.35403   | -0.220148    | 0.371472  | 0.704412 |
| Sec14l1_j2       | 0         | 1.01139   | 1.79769e+308 | 1.83E-11  | 2.12E-09 |
| Gm11734_j3       | 0.130951  | 0.132419  | 0.0160861    | 0.983482  | 1        |
| Tnrc6c_j8        | 1.58205   | 2.03802   | 0.365367     | 0.0624173 | 0.295668 |
| Afmid            | 0.517553  | 0.700524  | 0.436728     | 0.206821  | 0.551471 |
| Afmid_j5         | 0.719732  | 0.660787  | -0.123274    | 0.772544  | 0.92286  |
| C1qtnf1_j1       | 3.99522   | 4.91425   | 0            | 1         | 1        |
| Engase_j1        | 0.73445   | 0.32549   | -1.17405     | 0.0262205 | 0.169964 |
| Engase           | 2.9928    | 3.11525   | 0.0578491    | 0.692894  | 0.8862   |
| Ccdc40_j3        | 1.84007   | 1.91816   | 0.0599669    | 0.842382  | 0.950233 |
| Rnf213_j8        | 0.0912113 | 0.143731  | 0            | 1         | 1        |
| Gm11762_j1       | 0.0859859 | 0.0116895 | -2.87889     | 0.0406855 | 1        |
| Gm11762_j2       | 0.108064  | 0.108409  | 0.00460629   | 0.996024  | 1        |
| AK005967         | 1.87194   | 2.48146   | 0.406659     | 0.186071  | 0.526451 |
| Mrpl12_j2        | 32.6021   | 35.541    | 0.124521     | 0.374121  | 0.706986 |
| AK163532_j1      | 2.47417   | 2.17529   | 0            | 1         | 1        |
| Aspscr1_j2       | 0.579684  | 0.781908  | 0            | 1         | 1        |
| Lrrc45_j4        | 1.48412   | 1.77376   | 0            | 1         | 1        |
| Hexdc_j3         | 1.05088   | 0.912336  | 0            | 1         | 1        |
| Foxk2_j5         | 0.318337  | 1.59021   | 0            | 1         | 1        |
| Tbcd_j6          | 0.0814636 | 0.231777  | 0            | 1         | 1        |
| Metrn1_j1        | 0.88983   | 1.21999   | 0.455265     | 0.410986  | 0.730555 |
| Drg1_j1          | 15.1924   | 12.7662   | 0            | 1         | 1        |
| Rnf185_j1        | 0.102513  | 0.387275  | 0            | 1         | 1        |
| Inpp5j_j4        | 3.75464   | 2.45162   | 0            | 1         | 1        |
| Inpp5j_j6        | 8.42717   | 4.48534   | 0            | 1         | 1        |
| Smtn             | 1.56762   | 2.2089    | 0.494754     | 0.0130653 | 0.10448  |
| Osbp2_j4         | 3.01171   | 2.989     | 0            | 1         | 1        |
| Osbp2_j2         | 0         | 0.327759  | 0            | 1         | 1        |
| Mtmr3_j3         | 2.0682    | 0.398999  | 0            | 1         | 1        |
| Uqcr10_j1        | 1.84155   | 2.66851   | 0.535112     | 0.054572  | 0.272463 |
| Nf2_j7           | 0.418997  | 0.294223  | 0            | 1         | 1        |

|                  |           |           |              |           |           |
|------------------|-----------|-----------|--------------|-----------|-----------|
| Nf2_j6           | 0.272781  | 0.133529  | 0            | 1         | 1         |
| Nefh_j7          | 60.0883   | 74.0293   | 0            | 1         | 1         |
| Gas2l1_j1        | 2.63595   | 3.45129   | 0            | 1         | 1         |
| Gas2l1_j5        | 4.54755   | 3.88224   | 0            | 1         | 1         |
| Ewsr1            | 2.11267   | 2.93864   | 0            | 1         | 1         |
| Emid1_j1         | 0.347384  | 0.46304   | 0.414608     | 0.607606  | 0.845335  |
| Ccdc117_j1       | 3.27404   | 3.9273    | 0.262465     | 0.0764861 | 0.334148  |
| Urgcp            | 6.84283   | 6.0293    | 0            | 1         | 1         |
| Polm_j5          | 0.244263  | 0.445903  | 0.868294     | 0.0493584 | 0.256335  |
| Camk2b_j4        | 8.86248   | 7.48994   | 0            | 1         | 1         |
| Nudcd3_j1        | 0.943775  | 1.17193   | 0            | 1         | 1         |
| Nacad_j5         | 20.5353   | 21.3773   | 0            | 1         | 1         |
| Nacad_j4         | 3.9563    | 5.04046   | 0            | 1         | 1         |
| Nacad_j3         | 26.1179   | 27.3119   | 0            | 1         | 1         |
| Tbrg4            | 0.816018  | 2.60316   | 0            | 1         | 1         |
| Hus1_j4          | 0.189682  | 0.189855  | 0            | 1         | 1         |
| Zpbp_j6          | 0.306775  | 0.138693  | -1.14528     | 0.229953  | 0.577072  |
| Ddc_j3           | 0.0938296 | 0.315006  | 1.74726      | 0.166743  | 0.503133  |
| Grb10_j6         | 1.63304   | 3.55479   | 0            | 1         | 1         |
| Cobl_j2          | 3.6498    | 3.38017   | 0            | 1         | 1         |
| Sec61g_j1        | 0.11331   | 0.0573538 | -0.98231     | 0.513067  | 1         |
| Actr2            | 2.29961   | 1.92568   | 0            | 1         | 1         |
| Aftph_j3         | 4.47194   | 6.20162   | 0.471744     | 0.0196833 | 0.13931   |
| 1110067D22Rik    | 2.78573   | 2.84112   | 0            | 1         | 1         |
| 1110067D22Rik_j1 | 3.30247   | 3.95531   | 0            | 1         | 1         |
| Ehbp1_j4         | 0.609107  | 1.48582   | 0            | 1         | 1         |
| B3gnt2           | 3.57326   | 2.78638   | 0            | 1         | 1         |
| Commd1           | 9.94737   | 10.1903   | 0            | 1         | 1         |
| Papolg_j2        | 0.42423   | 0.32694   | -0.375821    | 0.353585  | 0.68999   |
| XLOC_004728      | 0.211063  | 0.16335   | -0.369707    | 0.619864  | 0.850903  |
| Ccdc85a_j3       | 2.62394   | 2.43535   | 0            | 1         | 1         |
| Ccdc85a_j5       | 0.133197  | 0         | 0            | 1         | 1         |
| Prorsd1_j3       | 0.5341    | 0.483463  | -0.143702    | 0.828881  | 0.944763  |
| Rps27a_j1        | 0.387629  | 0.385238  | 0            | 1         | 1         |
| Rps27a_j2        | 0.137854  | 0.172608  | 0            | 1         | 1         |
| Eml6_j4          | 0.52694   | 0.54077   | 0            | 1         | 1         |
| Spnb2_j1         | 164.168   | 159.48    | -0.0417937   | 0.630548  | 0.85633   |
| Acyp2            | 20.6148   | 14.0094   | -0.557288    | 7.20E-06  | 0.0002328 |
| Rhbdf1_j1        | 0.102167  | 0.0821223 | 0            | 1         | 1         |
| Nprl3            | 7.47301   | 6.44634   | -0.21321     | 0.113467  | 0.419202  |
| Efcab9_j1        | 0.120885  | 0.112834  | -0.099434    | 0.920061  | 1         |
| Fgf18_j3         | 0         | 0.357364  | 1.79769e+308 | 0.0147989 | 0.113779  |
| Npm1_j2          | 6.44738   | 7.79976   | 0.274716     | 0.035894  | 0.20902   |
| Tlx3_j1          | 19.8499   | 18.4078   | -0.108817    | 0.368821  | 0.702097  |
| Kcnip1           | 3.82543   | 3.55535   | -0.10563     | 0.657213  | 0.869349  |
| Kcnip1           | 6.56393   | 4.50617   | -0.542659    | 0.0092971 | 0.0812042 |
| AK015529_j2      | 0.504243  | 0.864963  | 0.778519     | 0.0373116 | 0.214128  |

|                  |           |           |            |           |           |
|------------------|-----------|-----------|------------|-----------|-----------|
| Dock2_j6         | 0.169252  | 0.0595882 | -1.50608   | 0.371006  | 0.703973  |
| Odz2_j1          | 1.05415   | 0.939955  | -0.165413  | 0.41423   | 0.732813  |
| Mat2b_j1         | 4.4984    | 4.13949   | 0          | 1         | 1         |
| Gabrg2_j2        | 0.934782  | 0.18935   | 0          | 1         | 1         |
| Ublcp1_j3        | 0.244506  | 0.159145  | 0          | 1         | 1         |
| Ublcp1_j13       | 0.155011  | 0.132654  | 0          | 1         | 1         |
| Cyfp2_j4         | 0.990075  | 0.903212  | 0          | 1         | 1         |
| Cyfp2            | 56.1607   | 60.6803   | 0          | 1         | 1         |
| Sgcd_j3          | 0.768423  | 0.857669  | 0          | 1         | 1         |
| Sgcd_j8          | 0.172446  | 0.160983  | 0          | 1         | 1         |
| Tgtp2_j1         | 0.903979  | 0.460726  | -0.972379  | 0.0567244 | 0.278613  |
| Cnot6            | 1.50172   | 2.21529   | 0          | 1         | 1         |
| Sqstm1_j2        | 132.005   | 124.601   | 0          | 1         | 1         |
| Ltc4s            | 0.069301  | 0.642354  | 3.21242    | 0.0094989 | 0.0824333 |
| Zfp2_j1          | 0.140598  | 0.0662641 | -1.08528   | 0.309429  | 0.654094  |
| Zfp2_j5          | 0.385773  | 0.364529  | -0.0817167 | 0.867432  | 0.95814   |
| Zfp354b_j3       | 0.334666  | 0.320055  | -0.0643993 | 0.930197  | 0.978611  |
| Hnrnpab_j3       | 2.16984   | 2.59378   | 0.257472   | 0.205184  | 0.549561  |
| N4bp3_j1         | 0.412596  | 0.453983  | 0.137907   | 0.757454  | 0.916403  |
| 0610009B22Rik_j1 | 8.46422   | 6.18469   | -0.452676  | 0.066274  | 0.307422  |
| Sec24a_j2        | 2.03898   | 1.94157   | -0.0706196 | 0.700352  | 0.889732  |
| Phf15_j4         | 1.91621   | 1.88964   | -0.0201464 | 0.911908  | 0.972279  |
| Ube2b            | 40.731    | 34.3121   | 0          | 1         | 1         |
| Hspa4_j1         | 9.43099   | 14.1557   | 0          | 1         | 1         |
| Uqcrq_j1         | 85.2061   | 87.8483   | 0.044059   | 0.730098  | 0.904677  |
| Ankrd43          | 0.517175  | 0.354573  | -0.544569  | 0.0493187 | 0.256155  |
| Slc22a5_j4       | 0.449497  | 0.370006  | 0          | 1         | 1         |
| Slc22a5_j5       | 0.215951  | 0.329688  | 0          | 1         | 1         |
| Cdc42se2_j2      | 0         | 0.179376  | 0          | 1         | 1         |
| Anxa6_j4         | 0.0295128 | 0.0662189 | 0          | 1         | 1         |
| Atox1_j2         | 44.0883   | 50.5417   | 0          | 1         | 1         |
| Fam114a2_j2      | 10.9641   | 10.4989   | 0          | 1         | 1         |
| Fam114a2_j3      | 15.0978   | 15.0984   | 0          | 1         | 1         |
| Gemin5           | 0.0384411 | 0.0554168 | 0          | 1         | 1         |
| Gemin5_j2        | 0.190803  | 0.0949077 | 0          | 1         | 1         |
| Rnf187_j5        | 0.479698  | 1.39782   | 1.54298    | 0.0038964 | 0.0421181 |
| Gjc2             | 0.0171569 | 0.11481   | 2.74238    | 0.193614  | 1         |
| Snap47_j4        | 22.1141   | 21.2021   | -0.0607601 | 0.719816  | 0.899359  |
| Snap47_j5        | 15.1018   | 12.6541   | -0.255116  | 0.105829  | 0.403926  |
| Zkscan17_j3      | 1.31554   | 0.842292  | 0          | 1         | 1         |
| AK005951_j2      | 0.134445  | 0.331545  | 1.30219    | 0.211012  | 0.555747  |
| Pemt_j2          | 0.674741  | 1.01888   | 0.594579   | 0.260255  | 0.608919  |
| Srebf1_j3        | 3.8116    | 3.71649   | -0.0364565 | 0.710099  | 0.89438   |
| Srebf1_j4        | 15.4018   | 17.181    | 0.157713   | 0.188434  | 0.529906  |
| Flii             | 0.408107  | 0.210925  | -0.952214  | 0.0168411 | 0.124966  |
| Gm16515          | 1.81777   | 1.32259   | -0.458803  | 0.0378126 | 0.215834  |
| Slc47a2_j1       | 0.934713  | 1.19071   | 0.349229   | 0.309718  | 0.654307  |



|                   |           |           |               |           |           |
|-------------------|-----------|-----------|---------------|-----------|-----------|
| Slc47a2_j2        | 0         | 0.0834644 | 1.79769e+308  | 0.0518475 | 1         |
| Slc47a1_j9        | 0.177253  | 0.0396159 | -2.16166      | 0.107985  | 0.408478  |
| Rnf112            | 9.71142   | 8.45102   | 0             | 1         | 1         |
| Rnf112_j11        | 3.35706   | 3.69964   | 0             | 1         | 1         |
| Mapk7_j5          | 2.39388   | 3.39513   | 0.504118      | 0.158216  | 0.492412  |
| Epn2_j3           | 0.767291  | 0.618904  | 0             | 1         | 1         |
| XLOC_004901       | 0.0903848 | 0.0956518 | 0.0817112     | 0.941347  | 1         |
| Prpsap2_j13       | 0.790918  | 0.131478  | -2.58871      | 0.210516  | 0.555069  |
| Akap10_j1         | 1.0629    | 0.536816  | -0.98551      | 1.21E-05  | 0.0003658 |
| Ncor1_j4          | 1.28988   | 1.27952   | 0             | 1         | 1         |
| XLOC_004908       | 1.15318   | 1.3875    | 0.266867      | 0.654533  | 0.867973  |
| Cenpv_j3          | 2.43972   | 3.51992   | 0.528825      | 0.177941  | 0.517294  |
| Cenpv             | 3.50137   | 3.40941   | -0.0383988    | 0.873326  | 0.959842  |
| Gm12279_j1        | 0.254731  | 0.265175  | 0.0579663     | 0.900715  | 0.968396  |
| Zfp286            | 0.0966025 | 0.0759294 | -0.347402     | 0.711097  | 1         |
| Arhgap44_j7       | 2.07006   | 6.03947   | 0             | 1         | 1         |
| 2310004I24Rik_j2  | 0.97864   | 1.25772   | 0             | 1         | 1         |
| AK010044_j1       | 0.134079  | 0.129917  | -0.0454898    | 0.95241   | 1         |
| AK010044_j2       | 0.14643   | 0.167489  | 0.193856      | 0.859909  | 0.955708  |
| Wdr16_j3          | 0.195098  | 0.248633  | 0.349816      | 0.798013  | 0.932953  |
| Wdr16_j5          | 0.261405  | 0.165575  | -0.658803     | 0.442407  | 0.750549  |
| Ndel1_j3          | 2.80901   | 4.16418   | 0             | 1         | 1         |
| Arhgef15_j1       | 2.73722   | 5.03301   | 0.878707      | 1.53E-06  | 5.97E-05  |
| Arhgef15_j4       | 0.486721  | 0.660113  | 0.439618      | 0.18499   | 0.525175  |
| Arhgef15          | 0.155763  | 0.190968  | 0.293982      | 0.53809   | 0.807846  |
| Chd3_j3           | 3.04836   | 4.3636    | 0             | 1         | 1         |
| Kdm6b_j7          | 1.61271   | 2.02255   | 0             | 1         | 1         |
| Dnahc2_j1         | 0.223899  | 4.84E-05  | -12.1761      | 0.987993  | 0.996422  |
| Efnb3_j2          | 0.302952  | 0.111579  | -1.44102      | 0.0896108 | 0.367183  |
| Efnb3             | 0.421618  | 0.420731  | -0.00304003   | 0.993263  | 0.997985  |
| BC096441_j1       | 0.0942792 | 0         | -1.79769e+308 | 0.029104  | 1         |
| Fgf11_j3          | 0.171353  | 0.286456  | 0.74134       | 0.141949  | 0.46851   |
| Nlgn2_j4          | 4.53035   | 4.11275   | -0.139518     | 0.308243  | 0.653146  |
| Tmem95_j1         | 0.199284  | 0.253106  | 0.344916      | 0.530692  | 0.80314   |
| 2810408A11Rik_j3  | 0.0789171 | 0.0986364 | 0.321782      | 0.841843  | 1         |
| 0610010K14Rik_j10 | 1.63524   | 1.36468   | -0.260944     | 0.410252  | 0.730238  |
| 0610010K14Rik_j7  | 0.340085  | 0.401601  | 0.239869      | 0.674969  | 0.877526  |
| 0610010K14Rik_j11 | 65.5233   | 74.1238   | 0.177928      | 0.126477  | 0.442942  |
| Cxcl16_j4         | 0         | 0.103764  | 1.79769e+308  | 0.0371187 | 1         |
| Vmo1_j2           | 0.0737238 | 0.0962199 | 0.384203      | 0.67603   | 1         |
| Pfn1_j1           | 160.37    | 199.632   | 0.315934      | 0.0003797 | 0.0064992 |
| Camta2_j4         | 4.31466   | 3.58926   | 0             | 1         | 1         |
| Inca1             | 0.294162  | 0.285015  | 0             | 1         | 1         |
| C1qbp_j2          | 34.1232   | 38.9841   | 0             | 1         | 1         |
| Dhx33_j4          | 2.24972   | 1.96486   | 0             | 1         | 1         |
| Smtnl2_j2         | 0.220534  | 0.391499  | 0.828011      | 0.102517  | 0.396694  |
| Spns2_j1          | 0.446428  | 0.425107  | 0             | 1         | 1         |

|                  |           |                        |           |           |          |
|------------------|-----------|------------------------|-----------|-----------|----------|
| Cyb5d2           | 4.75146   | 3.79229                | 0         | 1         | 1        |
| Tmem93           | 0.0635301 | 0.0645098              | 0         | 1         | 1        |
| Ctns_j1          | 0.475072  | 0.386845               | 0         | 1         | 1        |
| Pafah1b1         | 25.8345   | 18.3564                | 0         | 1         | 1        |
| Sgsm2_j2         | 0.641295  | 0.559221               | 0         | 1         | 1        |
| Sgsm2_j1         | 0.310892  | 0.596601               | 0         | 1         | 1        |
| Gemin4_j3        | 12.1836   | 13.0151                | 0.0952451 | 0.416156  | 0.73373  |
| Abr_j7           | 2.40178   | 2.59631                | 0         | 1         | 1        |
| Abr_j8           | 1.91073   | 1.69245                | 0         | 1         | 1        |
| Gosr1_j2         | 4.4124    | 4.79671                | 0         | 1         | 1        |
| Efcab5           | 0.0837498 | 0.104139               | 0.314348  | 0.751229  | 1        |
| Ankrd13b_j3      | 11.8581   | 10.4711                | 0         | 1         | 1        |
| Ankrd13b_j2      | 0.831134  | 0.276201               | 0         | 1         | 1        |
| Taok1_j2         | 2.60859   | 3.29878                | 0         | 1         | 1        |
| Pipox_j1         | 0.264909  | 0.665005               | 1.32787   | 0.013873  | 0.108754 |
| Traf4_j1         | 0.165282  | 0.231017               | 0.483069  | 0.159669  | 0.494064 |
| Nek8             | 0.0606684 | 0.193309               | 0         | 1         | 1        |
| Supt6h           | 0.297321  | 0.278584               | 0         | 1         | 1        |
| Sarm1_j1         | 0.178239  | 0                      | 0         | 1         | 1        |
| Ksr1_j1          | 0.558046  | 0.677118               | 0.279024  | 0.445967  | 0.753304 |
| Ksr1_j2          | 0.772076  | 0.557654               | -0.469373 | 0.130651  | 0.450056 |
| Evi2a            | 0.677573  | 1.34625                | 0.990497  | 0.0002171 | 0.004099 |
| Utp6_j2          | 0.0803044 | 0 -1.79769e+308        | 0.0028341 |           | 1        |
| 1110002N22Rik_j1 | 0.985544  | 1.00687                | 0.030884  | 0.935374  | 0.980275 |
| Myo1d_j1         | 0.566833  | 0.794586               | 0         | 1         | 1        |
| Myo1d_j2         | 0.276936  | 0.288488               | 0         | 1         | 1        |
| Accn1_j4         | 9.67116   | 12.8278                | 0         | 1         | 1        |
| Accn1_j5         | 22.6747   | 21.4964                | 0         | 1         | 1        |
| Accn1_j3         | 0.0863332 | 0.12976                | 0.587854  | 0.224149  | 1        |
| Cct6b_j2         | 0.104451  | 0.154045               | 0.560524  | 0.464184  | 1        |
| Cct6b_j7         | 0         | 0.0573353 1.79769e+308 | 0.0543287 |           | 1        |
| Gm11423          | 0.0870904 | 0.0375162              | -1.215    | 0.595844  | 1        |
| Nle1_j2          | 0.289194  | 0.536752               | 0.892217  | 0.0544509 | 0.272193 |
| Pex12_j1         | 0.657377  | 0.734284               | 0.159618  | 0.629449  | 0.856004 |
| Pex12            | 2.04367   | 2.11412                | 0.0488977 | 0.793256  | 0.931082 |
| Dusp14_j1        | 0.363313  | 0.649843               | 0.838876  | 0.0892318 | 0.36626  |
| Dhrs11_j3        | 0.959452  | 0.704421               | -0.445773 | 0.272791  | 0.621682 |
| Ggnbp2_j1        | 0         | 0.119139 1.79769e+308  | 0.0260971 |           | 1        |
| Ggnbp2_j3        | 0.169866  | 0.204089               | 0.264795  | 0.602058  | 0.842577 |
| Pigw             | 0.555702  | 0.572139               | 0.0420532 | 0.910072  | 0.971581 |
| XLOC_005083      | 0.323885  | 0.238989               | -0.438537 | 0.334927  | 0.675691 |
| XLOC_005083      | 2.53E-05  | 0.0627166              | 11.2734   | 0.967014  | 1        |
| Med13_j1         | 4.39258   | 4.09376                | 0         | 1         | 1        |
| Tmem49           | 4.8816    | 4.46324                | 0         | 1         | 1        |
| Cltc_j3          | 68.7032   | 44.7658                | 0         | 1         | 1        |
| Ypel2_j1         | 0.416958  | 0.303389               | -0.45873  | 0.243016  | 0.590473 |
| 1200011M11Rik_j2 | 0.132452  | 0 -1.79769e+308        | 0.0066833 |           | 1        |

|             |            |                        |            |           |           |
|-------------|------------|------------------------|------------|-----------|-----------|
| Akap1_j1    | 3.40641    | 3.00204                | -0.182306  | 0.506675  | 0.789088  |
| Nog         | 4.42533    | 3.36146                | -0.396697  | 0.0163243 | 0.122229  |
| Nme2_j1     | 23.1158    | 33.414                 | 0.531572   | 1.29E-05  | 0.0003861 |
| Nme1_j1     | 11.4845    | 0 -1.79769e+308        |            | 1.70E-32  | 5.73E-30  |
| Nme1        | 76.4514    | 89.0407                | 0.219922   | 0.0251712 | 0.165035  |
| Luc7l3_j6   | 4.47637    | 4.46507                | 0          | 1         | 1         |
| Mycbpap_j2  | 0.435678   | 0.365518               | 0          | 1         | 1         |
| Rsad1_j2    | 2.59325    | 3.22449                | 0          | 1         | 1         |
| Rsad1_j3    | 0.345504   | 0.452353               | 0          | 1         | 1         |
| Xylt2_j2    | 10.4296    | 8.34155                | -0.322298  | 0.0299512 | 0.185592  |
| Xylt2_j1    | 0.0961548  | 0.183092               | 0.929138   | 0.0178593 | 0.130182  |
| Pdk2_j3     | 0.118753   | 0.125076               | 0.0748442  | 0.938875  | 1         |
| Pdk2_j2     | 22.4545    | 23.1783                | 0.0457689  | 0.599759  | 0.841292  |
| Itga3_j4    | 1.65206    | 0.738099               | -1.16238   | 0.0056465 | 0.0557427 |
| Itga3       | 0          | 0.295098 1.79769e+308  |            | 1.07E-09  | 8.94E-08  |
| Myst2_j6    | 0.0280699  | 0.103689               | 0          | 1         | 1         |
| Myst2_j7    | 0.523969   | 0.366352               | 0          | 1         | 1         |
| Myst2       | 0.033904   | 0.290797               | 0          | 1         | 1         |
| AK027957_j2 | 0.160049   | 0 -1.79769e+308        |            | 0.0145068 | 0.112282  |
| AK027957_j1 | 0.066312   | 0.200647               | 1.59732    | 0.0602096 | 0.288946  |
| AK027957    | 0.821504   | 1.01856                | 0.31019    | 0.329171  | 0.671446  |
| Abi3_j2     | 0.117249   | 0.220596               | 0.911827   | 0.0661096 | 0.306981  |
| B4galnt2_j1 | 0          | 0.0772108 1.79769e+308 |            | 0.0508374 | 1         |
| Atp5g1_j2   | 0.346607   | 0.211153               | -0.715009  | 0.103101  | 0.398042  |
| Snx11_j1    | 3.75593    | 3.14269                | 0          | 1         | 1         |
| Snx11_j2    | 1.97132    | 3.29512                | 0          | 1         | 1         |
| Snx11_j3    | 2.96994    | 2.8662                 | 0          | 1         | 1         |
| Nfe2l1      | 38.1227    | 30.0539                | 0          | 1         | 1         |
| Nfe2l1      | 8.42741    | 8.10688                | 0          | 1         | 1         |
| Cdk5rap3_j2 | 0.195418   | 0.0577271              | -1.75924   | 0.164978  | 0.501261  |
| Sp2_j1      | 2.99121    | 3.19254                | 0.0939717  | 0.573795  | 0.827772  |
| Lrrc46      | 1.41841    | 1.46066                | 0          | 1         | 1         |
| Tbkbp1_j5   | 0          | 0.383927               | 0          | 1         | 1         |
| Srcin1_j2   | 0.00938044 | 0.359579               | 0          | 1         | 1         |
| Srcin1_j1   | 0.435927   | 0.0438423              | 0          | 1         | 1         |
| AK155239_j1 | 0.488368   | 0.204266               | 0          | 1         | 1         |
| Pcgf2_j1    | 0.520235   | 0.272295               | -0.933995  | 0.0834789 | 0.352255  |
| Pip4k2b_j1  | 1.21596    | 1.01621                | 0          | 1         | 1         |
| Pip4k2b_j2  | 2.50066    | 2.21857                | 0          | 1         | 1         |
| Rpl23_j10   | 0.289452   | 0 -1.79769e+308        |            | 0.0130882 | 0.104567  |
| Plxdc1_j5   | 0.954011   | 0.694295               | -0.458456  | 0.218719  | 0.565018  |
| Arl5c_j3    | 0          | 0.0563979 1.79769e+308 |            | 0.188466  | 1         |
| Fbxl20_j2   | 0.864568   | 1.09212                | 0          | 1         | 1         |
| Med1        | 1.36919    | 1.14009                | 0          | 1         | 1         |
| Ormdl3_j1   | 1.4751     | 1.43845                | -0.0362979 | 0.908328  | 0.971082  |
| Med24_j6    | 0.806623   | 0.813098               | 0          | 1         | 1         |
| Med24       | 3.92071    | 4.44934                | 0          | 1         | 1         |

|             |           |           |              |           |          |
|-------------|-----------|-----------|--------------|-----------|----------|
| Med24_j5    | 1.5089    | 2.33616   | 0            | 1         | 1        |
| Nr1d1       | 4.4921    | 4.15805   | -0.111483    | 0.332888  | 0.674    |
| Krt16       | 0.0568551 | 0.244133  | 2.10231      | 0.0189262 | 0.135765 |
| Jup_j1      | 67.0888   | 69.5362   | 0            | 1         | 1        |
| Nt5c3l_j1   | 4.26754   | 3.262     | -0.387647    | 0.137039  | 0.460328 |
| Acly_j2     | 65.1761   | 84.6017   | 0            | 1         | 1        |
| Acly        | 28.9244   | 33.3553   | 0            | 1         | 1        |
| Dhx58_j2    | 0.226856  | 0.412742  | 0.863465     | 0.247606  | 0.595013 |
| Kat2a_j2    | 5.93859   | 6.08714   | 0            | 1         | 1        |
| Ghdc_j2     | 0.208247  | 0.353763  | 0            | 1         | 1        |
| Stat5b      | 0.494141  | 0.823933  | 0            | 1         | 1        |
| Stat3_j2    | 0.782113  | 1.17269   | 0            | 1         | 1        |
| Stat3_j3    | 0.724001  | 0.551263  | 0            | 1         | 1        |
| Psmc3ip_j2  | 0.125247  | 0.0182311 | 0            | 1         | 1        |
| Fam134c_j1  | 1.33219   | 1.88304   | 0            | 1         | 1        |
| Plekhh3_j2  | 0.299744  | 0.444331  | 0.567905     | 0.258641  | 0.607438 |
| Plekhh3     | 5.47398   | 5.72084   | 0.0636369    | 0.639299  | 0.860421 |
| Ccr10       | 0.547514  | 0.289337  | 0            | 1         | 1        |
| Aarsd1_j2   | 5.89541   | 4.59838   | 0            | 1         | 1        |
| Vat1_j1     | 49.5292   | 69.3436   | 0            | 1         | 1        |
| Brca1_j1    | 0.139594  | 1.97E-05  | -12.7917     | 0.976956  | 0.993297 |
| Etv4_j6     | 0         | 0.0534968 | 1.79769e+308 | 0.095789  | 1        |
| Dusp3_j2    | 6.28465   | 9.14442   | 0            | 1         | 1        |
| Mpp2_j2     | 0.272634  | 0.104589  | 0            | 1         | 1        |
| Hdac5_j1    | 5.21561   | 4.33986   | 0            | 1         | 1        |
| Hdac5_j3    | 0.760481  | 1.8617    | 0            | 1         | 1        |
| Atxn7l3_j1  | 22.3627   | 19.025    | 0            | 1         | 1        |
| Atxn7l3_j2  | 1.5578    | 1.87636   | 0            | 1         | 1        |
| Ubtj_j5     | 4.73498   | 4.68403   | 0            | 1         | 1        |
| Ubtj_j3     | 2.13854   | 2.38969   | 0            | 1         | 1        |
| Ubtj        | 10.1248   | 8.26393   | 0            | 1         | 1        |
| Fam171a2_j1 | 0.817231  | 0.999891  | 0.291027     | 0.39004   | 0.717083 |
| Itga2b_j6   | 0.520301  | 0.498298  | -0.062336    | 0.869126  | 0.958391 |
| Itga2b_j5   | 0         | 0.0469262 | 1.79769e+308 | 0.0969115 | 1        |
| Gpatch8_j1  | 0.252431  | 0         | 0            | 1         | 1        |
| Gpatch8_j2  | 0.686869  | 1.60369   | 0            | 1         | 1        |
| AK144330    | 0.291845  | 0.234662  | -0.314617    | 0.738868  | 0.908304 |
| Eftud2_j1   | 6.21521   | 8.12152   | 0            | 1         | 1        |
| Eftud2_j2   | 0.768686  | 1.27986   | 0            | 1         | 1        |
| Gfap_j2     | 0.052405  | 1.93E-05  | -11.4086     | 0.984755  | 1        |
| AK010390    | 0.0666642 | 0.102902  | 0.626286     | 0.545807  | 1        |
| XLOC_005249 | 0.110014  | 0.317529  | 1.52921      | 0.0528918 | 0.267306 |
| Map3k14_j2  | 0.808394  | 0.509232  | -0.666737    | 0.140121  | 0.465626 |
| XLOC_005254 | 0.195993  | 0.082091  | -1.25551     | 0.282813  | 0.631354 |
| Arhgap27_j2 | 2.42067   | 3.31683   | 0            | 1         | 1        |
| Gosr2_j1    | 9.28212   | 9.12175   | 0            | 1         | 1        |
| Nsf_j4      | 1.12396   | 0.597843  | 0            | 1         | 1        |

|                  |             |             |            |           |          |
|------------------|-------------|-------------|------------|-----------|----------|
| 1700081L11Rik_j6 | 5.23999     | 4.37461     | 0          | 1         | 1        |
| 1700081L11Rik_j7 | 0.102515    | 0.000224966 | 0          | 1         | 1        |
| Cdc27_j1         | 7.79473     | 8.47825     | 0          | 1         | 1        |
| Cyb561           | 1.72831     | 1.83385     | 0          | 1         | 1        |
| Strada_j2        | 0.000403946 | 1.30502     | 0          | 1         | 1        |
| Ftsj3_j4         | 0.22815     | 0.324649    | 0          | 1         | 1        |
| Ern1_j4          | 0.168879    | 0.0135551   | 0          | 1         | 1        |
| Pecam1_j1        | 0.446076    | 0.728102    | 0          | 1         | 1        |
| MtPolB           | 0.455638    | 0.394358    | -0.20838   | 0.745875  | 0.911456 |
| MtPolB           | 0.716707    | 0.841554    | 0.231672   | 0.550226  | 0.815285 |
| Ddx5_j5          | 29.6074     | 37.8708     | 0          | 1         | 1        |
| Smurf2_j1        | 3.30118     | 3.33883     | 0          | 1         | 1        |
| Smurf2_j2        | 1.13881     | 1.65349     | 0          | 1         | 1        |
| Bptf_j9          | 4.28288     | 4.74349     | 0.147369   | 0.274253  | 0.623353 |
| Bptf_j11         | 2.53201     | 3.35375     | 0.405491   | 0.032849  | 0.197417 |
| Bptf_j12         | 1.79474     | 1.70235     | -0.0762505 | 0.610621  | 0.846532 |
| Pitpnc1          | 0.104118    | 0.273602    | 0          | 1         | 1        |
| Prkca            | 13.1975     | 10.4483     | 0          | 1         | 1        |
| Slc16a6_j1       | 2.80712     | 3.4129      | 0          | 1         | 1        |
| Wipi1            | 2.05282     | 1.94197     | 0          | 1         | 1        |
| XLOC_005304      | 0.236887    | 0.0971797   | -1.28547   | 0.0734041 | 0.326393 |
| 2610035D17Rik_j1 | 0.198495    | 0.299211    | 0          | 1         | 1        |
| Slc39a11_j1      | 5.64891     | 5.92946     | 0.0699271  | 0.614705  | 0.84781  |
| Slc39a11         | 2.36487     | 2.10538     | -0.167676  | 0.442334  | 0.750549 |
| Cdc42ep4_j3      | 0.117418    | 0.154682    | 0          | 1         | 1        |
| XLOC_005312      | 0.029926    | 0.0620053   | 1.05099    | 0.70381   | 1        |
| Nat9_j2          | 0.3031      | 0.406928    | 0.424981   | 0.490008  | 0.779734 |
| Atp5h_j1         | 4.87141     | 5.33739     | 0.131797   | 0.715278  | 0.897128 |
| Atp5h_j2         | 11.1353     | 12.0297     | 0.111468   | 0.571862  | 0.827089 |
| Atp5h            | 3.7761      | 2.7734      | -0.445244  | 0.169991  | 0.507178 |
| Gga3_j9          | 0.420535    | 0.340121    | 0          | 1         | 1        |
| Gga3_j11         | 0.142648    | 0.400144    | 0          | 1         | 1        |
| Gga3_j12         | 1.45886     | 1.68566     | 0          | 1         | 1        |
| Grb2_j7          | 1.22143     | 1.48007     | 0          | 1         | 1        |
| Grb2_j5          | 0.736803    | 0.150149    | 0          | 1         | 1        |
| Grb2             | 22.8252     | 22.9984     | 0          | 1         | 1        |
| Caskin2_j3       | 0.252344    | 0.211279    | 0          | 1         | 1        |
| Recql5_j1        | 0.170267    | 0.296636    | 0.800896   | 0.204242  | 0.548407 |
| Recql5_j2        | 0.730181    | 1.07522     | 0.558307   | 0.0753583 | 0.331407 |
| Wbp2_j6          | 66.8253     | 103.261     | 0          | 1         | 1        |
| Wbp2_j7          | 3.71553     | 3.16961     | 0          | 1         | 1        |
| Fbf1_j2          | 0.0576847   | 0.0793069   | 0          | 1         | 1        |
| Acox1_j1         | 2.15361     | 4.14172     | 0          | 1         | 1        |
| Srp68_j1         | 3.13119     | 0           | 0          | 1         | 1        |
| Exoc7_j2         | 3.50773     | 3.3328      | 0          | 1         | 1        |
| Rnf157_j5        | 44.5286     | 37.0265     | 0          | 1         | 1        |
| Rnf157_j3        | 7.47785     | 5.38374     | 0          | 1         | 1        |

|                  |           |                       |            |           |           |
|------------------|-----------|-----------------------|------------|-----------|-----------|
| Rnf157_j4        | 17.8206   | 10.8917               | 0          | 1         | 1         |
| Prpsap1_j3       | 2.99787   | 3.55164               | 0          | 1         | 1         |
| Prpsap1_j4       | 2.95186   | 2.55239               | 0          | 1         | 1         |
| Cygb_j2          | 0.154677  | 0.619292              | 0          | 1         | 1         |
| St6galnac2_j4    | 0.25515   | 0 -1.79769e+308       |            | 6.22E-06  | 0.0002048 |
| XLOC_005363      | 0         | 0.143916 1.79769e+308 |            | 0.0999845 | 1         |
| Cyth1_j5         | 0.796175  | 0.11975               | 0          | 1         | 1         |
| Cyth1            | 8.60586   | 8.39618               | 0          | 1         | 1         |
| Usp36_j5         | 0.801787  | 1.10642               | 0          | 1         | 1         |
| Usp36_j4         | 1.06383   | 0.976787              | 0          | 1         | 1         |
| Timp2_j1         | 22.2283   | 17.2138               | 0          | 1         | 1         |
| Timp2_j5         | 0.519469  | 0.181353              | 0          | 1         | 1         |
| XLOC_005367      | 0.118366  | 0.155418              | 0.392902   | 0.701893  | 1         |
| XLOC_005367      | 0.107293  | 0.0627922             | -0.772893  | 0.600209  | 1         |
| Lgals3bp         | 24.5893   | 23.4341               | -0.0694252 | 0.467602  | 0.766717  |
| Rbfox3_j6        | 0         | 0.0543962             | 0          | 1         | 1         |
| Rbfox3_j1        | 17.2143   | 13.4622               | 0          | 1         | 1         |
| Rbfox3_j8        | 12.5252   | 15.6581               | 0          | 1         | 1         |
| Cbx4_j1          | 0.618017  | 1.58054               | 1.3547     | 6.30E-05  | 0.0014548 |
| Tbc1d16_j5       | 0.0681442 | 0.0432632             | 0          | 1         | 1         |
| Tbc1d16          | 1.26336   | 1.53773               | 0          | 1         | 1         |
| Aatk_j4          | 26.5946   | 28.7434               | 0          | 1         | 1         |
| Aatk_j6          | 6.39905   | 7.27077               | 0          | 1         | 1         |
| Azi1_j1          | 1.47618   | 2.34406               | 0.667146   | 0.0218678 | 0.149894  |
| Slc38a10_j5      | 2.10519   | 4.32303               | 0          | 1         | 1         |
| Slc38a10_j6      | 4.73694   | 6.54294               | 0          | 1         | 1         |
| 2810410L24Rik_j3 | 0.161853  | 0.29207               | 0.851631   | 0.126916  | 0.443747  |
| 2810410L24Rik_j5 | 0.538278  | 0.640511              | 0.250871   | 0.625162  | 0.853774  |
| 2310003H01Rik_j1 | 0.553889  | 0.590278              | 0          | 1         | 1         |
| 2310003H01Rik    | 0         | 0.0710697             | 0          | 1         | 1         |
| Nploc4_j2        | 7.66936   | 7.04539               | 0          | 1         | 1         |
| Arl16            | 3.21969   | 2.72256               | -0.241962  | 0.125745  | 0.441571  |
| P4hb_j1          | 12.7771   | 15.1187               | 0          | 1         | 1         |
| Pcyt2_j4         | 13.2558   | 17.5824               | 0          | 1         | 1         |
| Pcyt2_j1         | 3.69794   | 3.63221               | 0          | 1         | 1         |
| Pcyt2_j2         | 0.31155   | 0.575017              | 0          | 1         | 1         |
| Notum_j3         | 0.0472979 | 0 -1.79769e+308       |            | 0.136911  | 1         |
| Dus1l            | 2.014     | 2.43065               | 0          | 1         | 1         |
| Fasn_j2          | 2.6366    | 5.93295               | 1.17007    | 0         | 0         |
| Ccdc57           | 0.0954292 | 0.139684              | 0.549661   | 0.415455  | 1         |
| Csnk1d_j3        | 26.8975   | 31.358                | 0          | 1         | 1         |
| Sectm1b_j2       | 0.402344  | 0.605192              | 0.588964   | 0.155277  | 0.488418  |
| 1110031I02Rik    | 3.54669   | 3.80395               | 0          | 1         | 1         |
| BC017643_j1      | 8.78811   | 11.8876               | 0          | 1         | 1         |
| Pisd-ps1_j6      | 2.37314   | 2.81079               | 0          | 1         | 1         |
| Pisd-ps1_j5      | 0.995674  | 0.719617              | 0          | 1         | 1         |
| Eif4enif1_j2     | 0.376003  | 0.489686              | 0          | 1         | 1         |

|                  |           |                 |            |           |           |
|------------------|-----------|-----------------|------------|-----------|-----------|
| Morc2a_j2        | 0.284189  | 0.196022        | -0.535839  | 0.0775914 | 0.337104  |
| Morc2a_j1        | 1.015     | 1.20357         | 0.245849   | 0.0939691 | 0.377713  |
| Pes1_j2          | 0.181822  | 0.086157        | -1.07749   | 0.11213   | 0.416716  |
| Pes1_j9          | 0.792478  | 0.252092        | -1.65242   | 0.0001291 | 0.0026579 |
| Gal3st1          | 1.16877   | 0.000344258     | 0          | 1         | 1         |
| Rnf215_j1        | 0.699226  | 0.811733        | 0.215246   | 0.441075  | 0.749922  |
| Sf3a1_j1         | 9.42004   | 9.75336         | 0.0501663  | 0.610746  | 0.846566  |
| Gatsl3_j1        | 0.48472   | 0.0775073       | -2.64475   | 0.0220688 | 0.150848  |
| Ascc2_j4         | 0.0771347 | 0.0676116       | 0          | 1         | 1         |
| Zmat5            | 11.4709   | 11.6608         | 0.0236939  | 0.84807   | 0.951888  |
| Thoc5_j2         | 3.64853   | 4.19634         | 0          | 1         | 1         |
| Dbnl             | 0.239998  | 0.217516        | 0          | 1         | 1         |
| Dbnl_j7          | 17.8969   | 20.1896         | 0          | 1         | 1         |
| Ykt6_j1          | 1.52018   | 1.92639         | 0.341656   | 0.500738  | 0.785042  |
| Ogdh_j1          | 3.2022    | 3.5337          | 0          | 1         | 1         |
| Ogdh_j3          | 5.69375   | 5.28028         | 0          | 1         | 1         |
| Ogdh_j4          | 5.56429   | 3.80723         | 0          | 1         | 1         |
| Zmiz2_j1         | 0.230675  | 0.0355336       | 0          | 1         | 1         |
| Zmiz2_j12        | 0.198078  | 0.15097         | 0          | 1         | 1         |
| XLOC_003926      | 0.0990743 | 0.00389937      | -4.6672    | 0.563507  | 1         |
| XLOC_003926      | 0.184239  | 0.11317         | -0.70309   | 0.228577  | 0.575624  |
| Adcy1_j2         | 0.154307  | 0 -1.79769e+308 |            | 7.78E-12  | 9.79E-10  |
| Upp1_j1          | 0.065815  | 0 -1.79769e+308 |            | 0.0778627 | 1         |
| Abca13_j1        | 0.228236  | 0.0776874       | -1.55477   | 0.274683  | 0.623768  |
| Vwc2_j3          | 0.114644  | 0.10744         | -0.0936325 | 0.921003  | 1         |
| 4930415F15Rik_j2 | 0.127163  | 0.12364         | -0.0405259 | 0.962132  | 1         |
| Fbxo48_j1        | 0.211594  | 0.0725316       | -1.54462   | 0.114978  | 0.421857  |
| XLOC_003953      | 0.12452   | 0.0944548       | -0.398683  | 0.772978  | 1         |
| Fam161a_j13      | 0.117132  | 0 -1.79769e+308 |            | 0.0032    | 1         |
| Fam161a          | 0.299289  | 0.0294664       | -3.3444    | 0.0295741 | 0.184004  |
| Fam161a_j12      | 0.136788  | 0 -1.79769e+308 |            | 0.0018698 | 1         |
| Fam161a_j11      | 0.123888  | 0.257057        | 1.05305    | 0.143562  | 0.470705  |
| Fam161a_j14      | 0.0666122 | 0 -1.79769e+308 |            | 0.0230196 | 1         |
| Usp34_j3         | 1.34313   | 0.767289        | -0.807751  | 1.57E-05  | 0.0004559 |
| XLOC_003966      | 0.138083  | 0.0655265       | -1.07539   | 0.260202  | 0.608919  |
| Fancl_j2         | 0.0876399 | 0.00045098      | -7.60238   | 0.897439  | 1         |
| XLOC_003974      | 0.157082  | 0.164138        | 0.0633855  | 0.917024  | 0.97399   |
| Mtif2            | 0.0734038 | 0               | 0          | 1         | 1         |
| Rtn4_j1          | 1.2095    | 1.03976         | -0.218159  | 0.370063  | 0.703555  |
| Asb3_j1          | 2.55992   | 2.8313          | 0.145365   | 0.40792   | 0.728248  |
| Snrnp25_j1       | 0.478459  | 0.530816        | 0          | 1         | 1         |
| Hba-a2_j1        | 3.72542   | 4.18622         | 0          | 1         | 1         |
| Hbq1b_j1         | 1.79834   | 1.54397         | 0          | 1         | 1         |
| Sh3pxd2b_j2      | 0.121548  | 0.0996024       | 0          | 1         | 1         |
| Sh3pxd2b_j3      | 1.67548   | 2.06761         | 0          | 1         | 1         |
| Ubt2_j1          | 9.58806   | 8.60879         | -0.155429  | 0.203854  | 0.547998  |
| Stk10            | 1.12422   | 1.54813         | 0.461598   | 0.0075116 | 0.0694247 |

|               |           |           |               |           |           |
|---------------|-----------|-----------|---------------|-----------|-----------|
| Pank3_j1      | 1.41001   | 1.87482   | 0             | 1         | 1         |
| Nudcd2_j2     | 0.0726852 | 0         | -1.79769e+308 | 0.0936723 | 1         |
| Gabrb2        | 0.390801  | 0.121366  | -1.68707      | 0.0002449 | 0.0045413 |
| Gabrb2_j1     | 0.14488   | 5.67E-05  | -11.3191      | 0.841927  | 0.950055  |
| Pwwp2a_j4     | 0.457224  | 0.367877  | -0.313676     | 1         | 1         |
| Rnf145_j6     | 5.24546   | 6.89945   | 0             | 1         | 1         |
| Ebf1          | 6.93671   | 6.23357   | 0             | 1         | 1         |
| Ebf4_j3       | 0.235269  | 0.404663  | 0             | 1         | 1         |
| Ebf4_j4       | 3.59562   | 4.00331   | 0             | 1         | 1         |
| Adam19_j4     | 2.87007   | 2.18724   | -0.391972     | 0.0262174 | 0.169964  |
| Trim7_j3      | 0.238031  | 0.184186  | 0             | 1         | 1         |
| Zfp62         | 0.108469  | 0.0912519 | 0             | 1         | 1         |
| Mapk9_j2      | 4.26014   | 4.87623   | 0             | 1         | 1         |
| Mapk9         | 9.67557   | 9.2743    | 0             | 1         | 1         |
| Mapk9_j3      | 0.609016  | 0.412651  | 0             | 1         | 1         |
| Mapk9_j5      | 20.5643   | 19.0868   | 0             | 1         | 1         |
| Hnrnp1_j2     | 1.20668   | 0.954378  | -0.338415     | 0.367767  | 0.701102  |
| Hnrnp1_j8     | 0.218615  | 0         | -1.79769e+308 | 0.0046827 | 0.0483055 |
| Zfp354a_j1    | 0.0634234 | 0.0671138 | 0.0815954     | 0.930255  | 1         |
| Zfp354a_j5    | 0.142534  | 0         | -1.79769e+308 | 6.44E-05  | 0.0014796 |
| Clk4_j2       | 0.223154  | 0.204259  | 0             | 1         | 1         |
| Clk4_j7       | 0.259058  | 0.749824  | 0             | 1         | 1         |
| Agxt2l2_j2    | 1.65727   | 1.68092   | 0.020442      | 0.938628  | 0.981258  |
| D930048N14Rik | 0.27913   | 0.137848  | -1.01786      | 0.0695484 | 0.316258  |
| Ppp2ca_j1     | 4.47534   | 3.6386    | 0             | 1         | 1         |
| Vdac1_j3      | 52.2482   | 48.7984   | 0             | 1         | 1         |
| Fstl4_j1      | 0.111892  | 0         | -1.79769e+308 | 0.0009957 | 1         |
| Aff4_j3       | 5.61668   | 5.32814   | 0             | 1         | 1         |
| Aff4_j4       | 8.11615   | 9.20836   | 0             | 1         | 1         |
| Shroom1_j1    | 0.142534  | 0.0733434 | -0.95857      | 0.242529  | 0.590017  |
| Sept8_j1      | 0.273368  | 0         | -1.79769e+308 | 1.94E-08  | 1.28E-06  |
| Sept8_j2      | 8.11195   | 6.20007   | -0.387763     | 0.0291381 | 0.182082  |
| Fnip1_j1      | 0.0490871 | 0.329905  | 2.74864       | 7.19E-06  | 0.0002326 |
| Rapegef6_j1   | 0.19159   | 0.141022  | 0             | 1         | 1         |
| Gm2a_j1       | 0.232289  | 0         | -1.79769e+308 | 8.24E-07  | 3.51E-05  |
| Slc36a1       | 32.9179   | 34.422    | 0             | 1         | 1         |
| G3bp1_j6      | 3.85373   | 0.919298  | 0             | 1         | 1         |
| Gria1         | 0.178384  | 0.330124  | 0             | 1         | 1         |
| Larp1_j5      | 35.9581   | 37.8635   | 0             | 1         | 1         |
| Cnot8_j2      | 4.37167   | 6.33265   | 0             | 1         | 1         |
| Mrpl22_j3     | 0.657731  | 8.55E-05  | -12.9085      | 0.899465  | 0.967912  |
| Gm12250       | 0.299202  | 0.205623  | -0.541113     | 0.0711267 | 0.320623  |
| Igtp_j2       | 0.0963246 | 0.0173832 | 0             | 1         | 1         |
| Zfp692-ps_j2  | 0.275395  | 0.0877908 | -1.64936      | 0.0021751 | 0.0266564 |
| Sh3bp5l_j1    | 23.9337   | 22.3945   | 0             | 1         | 1         |
| Wnt9a_j1      | 0.248929  | 0         | -1.79769e+308 | 2.75E-06  | 0.0001004 |
| Mripip_j1     | 0.588021  | 0.310127  | -0.923008     | 0.304874  | 0.65013   |



|                  |           |            |               |           |           |
|------------------|-----------|------------|---------------|-----------|-----------|
| Mprip_j5         | 1.88077   | 1.48183    | 0             | 1         | 1         |
| XLOC_004102      | 0.0638577 | 0.0240925  | -1.40627      | 0.432154  | 1         |
| Myo15_j1         | 0.066779  | 0.0454692  | -0.554505     | 0.624392  | 1         |
| Llg1_j1          | 0.434435  | 0.362798   | -0.259974     | 0.52562   | 0.800855  |
| Llg1_j4          | 0.683133  | 0.829884   | 0.280742      | 0.4023    | 0.725446  |
| Smcr8_j2         | 0.142089  | 0.0953459  | -0.57555      | 0.359618  | 0.694866  |
| Dhrs7b_j2        | 0.489083  | 0          | -1.79769e+308 | 0.0045304 | 0.0471542 |
| Kcnj12_j3        | 5.08552   | 4.66166    | 0             | 1         | 1         |
| Grap_j1          | 0.383651  | 0.00012396 | -11.5957      | 0.914511  | 0.973347  |
| Ttc19_j1         | 0.231066  | 0.151885   | 0             | 1         | 1         |
| XLOC_004129      | 0.518734  | 0.395335   | -0.391917     | 0.465481  | 0.765392  |
| Ubb_j2           | 1066.77   | 1304.76    | 0.290532      | 0.0013424 | 0.0181045 |
| Trpv2_j4         | 0.406778  | 0.525784   | 0             | 1         | 1         |
| Fbxw10_j1        | 0.0987903 | 0.0489785  | -1.01222      | 0.655694  | 1         |
| Fbxw10_j2        | 0.149698  | 0.0823893  | -0.86153      | 0.429537  | 0.742785  |
| Pmp22_j4         | 16.1769   | 14.5882    | 0             | 1         | 1         |
| Elac2_j3         | 9.97713   | 9.70898    | 0             | 1         | 1         |
| Zkscan6_j4       | 0.646697  | 0.135801   | 0             | 1         | 1         |
| 9130409J20Rik_j2 | 0.0450545 | 0.424237   | 3.23513       | 0.0001314 | 0.0027004 |
| Gm12299_j1       | 0.106433  | 0.00422881 | -4.65355      | 0.487796  | 1         |
| Tmem220_j1       | 0.0807131 | 0.0325142  | -1.31173      | 0.411563  | 1         |
| Tmem220_j4       | 0.138731  | 0.0600912  | -1.20706      | 0.301923  | 0.648067  |
| Myh8_j6          | 0.116958  | 0.0071057  | -4.04088      | 0.278519  | 1         |
| Gas7_j6          | 0.985981  | 0.450218   | 0             | 1         | 1         |
| Gas7_j7          | 1.65132   | 1.96794    | 0             | 1         | 1         |
| Pik3r5_j5        | 0.599631  | 0.523362   | -0.196266     | 0.717688  | 0.898243  |
| Pik3r5_j6        | 0.948568  | 0.60334    | -0.652781     | 0.0125898 | 0.101739  |
| Pik3r6_j1        | 0.0878426 | 0.0987529  | 0.168903      | 0.87854   | 1         |
| Pik3r6           | 0.11847   | 0.139798   | 0.238816      | 0.725045  | 1         |
| Myh10_j7         | 1.33159   | 2.6708     | 0             | 1         | 1         |
| Slc25a35_j2      | 0.06405   | 0.084406   | 0             | 1         | 1         |
| 1500010J02Rik_j3 | 0.343202  | 0.276452   | 0             | 1         | 1         |
| Aurkb_j1         | 0.188179  | 0.180207   | -0.0624525    | 0.927149  | 0.977499  |
| Vamp2_j1         | 62.7273   | 68.2502    | 0             | 1         | 1         |
| Per1_j6          | 1.48643   | 3.29469    | 1.14829       | 1.75E-05  | 0.0004969 |
| XLOC_004173      | 0.191161  | 0.136621   | 0             | 1         | 1         |
| Zbtb4_j4         | 16.8645   | 14.7933    | 0             | 1         | 1         |
| 1810027O10Rik_j1 | 8.65613   | 11.0147    | 0.347636      | 0.189745  | 0.531612  |
| Neurl4_j5        | 3.64098   | 4.26531    | 0.228323      | 0.194967  | 0.537285  |
| Gps2_j2          | 0.942398  | 0.57312    | 0             | 1         | 1         |
| Gps2_j4          | 2.33175   | 2.66373    | 0             | 1         | 1         |
| Ybx2_j4          | 0.0946958 | 0          | -1.79769e+308 | 0.0076601 | 1         |
| Gabarap_j2       | 35.4066   | 47.2419    | 0.41605       | 0.0007731 | 0.0116527 |
| Dlg4_j5          | 0.458587  | 0          | 0             | 1         | 1         |
| Mgl2_j1          | 8.85E-05  | 0.340798   | 11.9107       | 0.92473   | 0.976534  |
| XLOC_004192      | 0.154925  | 0.0908594  | -0.769865     | 0.403494  | 0.726353  |
| Arrb2_j1         | 5.13727   | 7.16254    | 0             | 1         | 1         |

|                   |           |                 |            |           |           |
|-------------------|-----------|-----------------|------------|-----------|-----------|
| Pld2_j4           | 0.449346  | 0.479334        | 0.0932065  | 0.810948  | 0.938047  |
| Pld2              | 1.88078   | 2.2205          | 0.239555   | 0.204887  | 0.54917   |
| Pld2_j14          | 4.00234   | 4.29982         | 0.103432   | 0.641827  | 0.861896  |
| Mink1_j5          | 5.81711   | 3.57608         | -0.701925  | 9.00E-07  | 3.79E-05  |
| Kif1c             | 1.75152   | 1.7664          | 0          | 1         | 1         |
| Rabep1_j3         | 2.78336   | 3.10761         | 0          | 1         | 1         |
| Rpain_j1          | 7.71076   | 8.5957          | 0          | 1         | 1         |
| Mis12             | 0.687303  | 0.645906        | 0          | 1         | 1         |
| Wscd1_j1          | 0.0544687 | 0 -1.79769e+308 |            | 0.0202342 | 1         |
| Xaf1_j3           | 0.191975  | 0.0280585       | -2.77441   | 0.304642  | 0.650106  |
| Xaf1_j4           | 1.66814   | 1.44758         | -0.204595  | 0.673229  | 0.876795  |
| Mybbp1a_j1        | 4.70443   | 5.85246         | 0          | 1         | 1         |
| Itgae_j2          | 0.158907  | 0.039766        | -1.99858   | 0.345709  | 0.684966  |
| P2rx5_j1          | 1.83702   | 1.25835         | 0          | 1         | 1         |
| E130309D14Rik     | 7.06531   | 8.10475         | 0          | 1         | 1         |
| 1300001I01Rik_j6  | 0.179354  | 0 -1.79769e+308 |            | 0.000302  | 0.0053661 |
| 1300001I01Rik_j9  | 7.54493   | 8.04426         | 0.0924531  | 0.494831  | 0.782608  |
| 1300001I01Rik_j10 | 3.28255   | 3.98803         | 0.28086    | 0.215655  | 0.561479  |
| Tsr1_j1           | 0.233833  | 0.268805        | 0          | 1         | 1         |
| Smg6              | 0.732987  | 0.560069        | 0          | 1         | 1         |
| Smg6_j3           | 5.36057   | 5.89311         | 0          | 1         | 1         |
| XLOC_004233       | 0.624981  | 0.552415        | 0          | 1         | 1         |
| Pitpna_j5         | 95.9872   | 91.7997         | 0          | 1         | 1         |
| Pitpna_j6         | 57.678    | 59.1517         | 0          | 1         | 1         |
| Inpp5k_j1         | 1.87401   | 1.95861         | 0          | 1         | 1         |
| Myo1c_j1          | 0.271116  | 0.186402        | 0          | 1         | 1         |
| Ywhae_j2          | 4.47883   | 21.7085         | 2.27707    | 0         | 0         |
| Tusc5             | 21.2864   | 18.6807         | 0          | 1         | 1         |
| Tusc5_j5          | 130.823   | 124.924         | 0          | 1         | 1         |
| Blmh_j2           | 0.217771  | 0 -1.79769e+308 |            | 0.0032514 | 0.0367778 |
| Ssh2              | 0.740745  | 0.7599          | 0          | 1         | 1         |
| Ssh2_j2           | 0.0581519 | 0.37514         | 0          | 1         | 1         |
| Git1_j2           | 3.01746   | 2.95129         | -0.0319898 | 0.88449   | 0.963396  |
| Nufip2_j2         | 0.1318    | 1.11045         | 3.07473    | 0         | 0         |
| Myo18a_j4         | 4.19455   | 3.49467         | 0          | 1         | 1         |
| Myo18a_j6         | 4.39542   | 4.30082         | 0          | 1         | 1         |
| Myo18a_j8         | 6.3417    | 8.89203         | 0          | 1         | 1         |
| XLOC_004263       | 0.160307  | 0.151763        | -0.0790137 | 0.907468  | 0.970759  |
| Rab34             | 0.612603  | 0.4517          | -0.439588  | 0.320469  | 0.663744  |
| Rab34_j1          | 4.42342   | 6.22427         | 0.492744   | 0.008762  | 0.0776581 |
| Proca1_j4         | 0.117364  | 0.0177402       | -2.72589   | 0.210441  | 1         |
| 2610507B11Rik_j1  | 3.2852    | 4.15794         | 0          | 1         | 1         |
| Pigs_j1           | 22.5642   | 20.5444         | -0.13529   | 0.144055  | 0.471055  |
| XLOC_004280       | 0.115761  | 0.0774909       | -0.57905   | 0.483751  | 1         |
| Nf1_j1            | 0.0544952 | 0.0408787       | -0.41478   | 0.561328  | 1         |
| XLOC_004285       | 0.181549  | 0.142777        | -0.346595  | 0.598171  | 0.840629  |
| Suz12             | 6.90418   | 7.06046         | 0          | 1         | 1         |

|                  |             |           |               |           |           |
|------------------|-------------|-----------|---------------|-----------|-----------|
| Atad5_j4         | 0.0613133   | 0         | -1.79769e+308 | 0.0024139 | 1         |
| Adap2_j2         | 0.138582    | 0.280935  | 1.01949       | 0.0466638 | 0.247726  |
| Adap2_j3         | 0.402039    | 0.740544  | 0.881251      | 0.0017304 | 0.0222537 |
| Rhot1_j2         | 1.82983     | 1.36826   | -0.419367     | 0.0858425 | 0.357676  |
| Zfp207_j2        | 1.92295     | 1.54179   | 0             | 1         | 1         |
| Psm11_j4         | 3.55498     | 4.46741   | 0.329598      | 0.477634  | 0.77269   |
| Psm11_j6         | 6.59481     | 5.0153    | -0.394997     | 0.0284145 | 0.179238  |
| Ccl11_j1         | 0.445669    | 0.489927  | 0.136594      | 0.840453  | 0.949579  |
| XLOC_004306      | 0.159608    | 0         | -1.79769e+308 | 0.0166591 | 0.123974  |
| XLOC_004307      | 0.129708    | 0.0116352 | -3.47871      | 0.305169  | 1         |
| Tmem132e_j3      | 15.9133     | 11.6543   | 0             | 1         | 1         |
| XLOC_004308      | 0.101997    | 0.0358031 | 0             | 1         | 1         |
| XLOC_004309      | 0.135764    | 0         | -1.79769e+308 | 0.0001494 | 1         |
| Lig3_j3          | 0.183241    | 0.138921  | -0.399484     | 0.222923  | 0.569987  |
| Slfn5_j4         | 0.204926    | 0.184629  | -0.150479     | 0.781181  | 0.926086  |
| Slfn5            | 0.000544724 | 0.0652222 | 6.90369       | 0.239964  | 1         |
| Slfn4_j2         | 0.0661928   | 0.0193547 | -1.77399      | 0.329894  | 1         |
| Slfn4_j1         | 0.06771     | 0.0624764 | -0.116059     | 0.907171  | 1         |
| Ap2b1_j4         | 0.083283    | 0.05147   | -0.694291     | 0.538147  | 1         |
| Rasl10b_j5       | 0.306962    | 0.671598  | 0             | 1         | 1         |
| Rasl10b_j8       | 5.52597     | 7.45815   | 0             | 1         | 1         |
| Taf15            | 0.0304353   | 0.106328  | 1.80471       | 0.165216  | 1         |
| Taf15_j10        | 8.16887     | 13.1398   | 0.685732      | 0.0022373 | 0.0272216 |
| Heatr6_j4        | 0.226327    | 0.0435322 | 0             | 1         | 1         |
| Synrg_j3         | 0.116491    | 0.161796  | 0             | 1         | 1         |
| Acaca_j19        | 0.231074    | 0.0651602 | -1.82629      | 1         | 1         |
| Gm11442          | 11.765      | 12.4784   | 0             | 1         | 1         |
| Bcas3_j5         | 0.522378    | 0.363902  | 0             | 1         | 1         |
| Ptrh2            | 2.34704     | 2.42719   | 0             | 1         | 1         |
| Mtmr4_j2         | 0.692023    | 0.172652  | 0             | 1         | 1         |
| Supt4h1_j4       | 16.2325     | 17.9742   | 0.147038      | 0.398031  | 0.722262  |
| Bzrap1_j1        | 0.118437    | 0         | -1.79769e+308 | 3.30E-06  | 1         |
| AK040276_j2      | 0.273668    | 0.139546  | -0.971689     | 0.313114  | 0.657447  |
| XLOC_004367      | 0.158148    | 0.143259  | -0.142653     | 0.86097   | 0.956047  |
| AK021127_j1      | 0.318727    | 0.307871  | -0.0499988    | 0.962495  | 0.989507  |
| Trim25_j4        | 0.0563832   | 0.0343481 | -0.715034     | 0.54464   | 1         |
| Tmem100_j2       | 23.9867     | 25.8766   | 0.109414      | 0.324831  | 0.667961  |
| Mmd_j1           | 0.877378    | 1.95289   | 1.15434       | 0.0001111 | 0.0023513 |
| Car10_j1         | 6.06964     | 7.93536   | 0             | 1         | 1         |
| Car10_j4         | 5.20145     | 1.51986   | 0             | 1         | 1         |
| Spag9_j2         | 0.0977002   | 0.119664  | 0.292558      | 0.65537   | 1         |
| Spag9_j5         | 0.293168    | 0.166699  | -0.81448      | 0.122297  | 0.435439  |
| B230206L02Rik_j1 | 0.407301    | 0.732621  | 0.846972      | 0.480644  | 0.774441  |
| Tob1_j1          | 7.94236     | 8.28478   | 0.0608965     | 0.660387  | 0.871072  |
| Dlx3_j4          | 0.0782786   | 0         | -1.79769e+308 | 0.0188024 | 1         |
| Slc35b1_j1       | 0.936224    | 0         | 0             | 1         | 1         |
| Slc35b1_j4       | 13.1537     | 12.7005   | 0             | 1         | 1         |

|                  |             |             |               |           |           |
|------------------|-------------|-------------|---------------|-----------|-----------|
| Spop_j3          | 0.129779    | 0.195088    | 0.58806       | 0.216401  | 0.562521  |
| XLOC_004396      | 0.0987433   | 0.0799501   | -0.304583     | 0.710849  | 1         |
| Phb_j4           | 9.90285     | 9.93458     | 0.00461489    | 0.969713  | 0.99148   |
| Zfp652_j4        | 0.566371    | 0.537873    | -0.0744798    | 0.740574  | 0.909118  |
| Zfp652_j3        | 0.147222    | 0.000325989 | -8.81895      | 0.225595  | 0.572642  |
| Gngt2            | 0.0920403   | 0.560881    | 2.60736       | 0.0627643 | 0.296706  |
| Gngt2            | 0.0995432   | 0           | -1.79769e+308 | 0.126064  | 1         |
| Gngt2_j3         | 0.187091    | 0.184614    | -0.0192297    | 0.974787  | 0.992777  |
| AK133925_j1      | 0.143336    | 0.073219    | -0.969106     | 0.326531  | 0.669766  |
| Snf8_j1          | 3.95213     | 4.03144     | 0.0286666     | 0.900982  | 0.968557  |
| Snf8_j4          | 21.103      | 24.8757     | 0.237291      | 0.267458  | 0.616277  |
| Ttll6_j4         | 0.125325    | 0.0890923   | -0.492307     | 0.53141   | 1         |
| Ttll6_j3         | 0.2089      | 0.0229331   | -3.18731      | 0.011268  | 0.0936032 |
| Ttll6_j6         | 0.0478829   | 0.089159    | 0.896868      | 0.254956  | 1         |
| Skap1_j4         | 0.27587     | 0.334487    | 0.277961      | 0.743395  | 0.910262  |
| Cbx1_j3          | 3.36924     | 3.50734     | 0             | 1         | 1         |
| D030028A08Rik_j1 | 0.199782    | 0.110743    | -0.851215     | 0.132437  | 0.452839  |
| Socs7_j4         | 7.68755     | 8.65297     | 0             | 1         | 1         |
| Arhgap23         | 0.85373     | 0.416885    | 0             | 1         | 1         |
| Mllt6_j7         | 6.05095     | 6.02927     | 0             | 1         | 1         |
| Psemb3           | 0.000533541 | 0.43542     | 9.67259       | 0.813377  | 0.939062  |
| Psemb3_j7        | 1.29875     | 1.08948     | -0.253483     | 0.677162  | 0.878651  |
| Lasp1_j2         | 0.0479629   | 0.0383696   | 0             | 1         | 1         |
| Thra_j2          | 1.13831     | 4.01634     | 1.81899       | 3.18E-10  | 2.90E-08  |
| Thra_j7          | 6.97357     | 11.2584     | 0.691034      | 0.0001351 | 0.0027519 |
| Msl1_j1          | 0.785999    | 0.726592    | 0             | 1         | 1         |
| Rapgef1_j1       | 0.143606    | 0           | -1.79769e+308 | 1.10E-05  | 0.000337  |
| Rapgef1_j2       | 0.0961826   | 0           | -1.79769e+308 | 0.0003651 | 1         |
| Ttc25_j5         | 0.133909    | 0.0211614   | -2.66174      | 0.0959187 | 1         |
| Cnp_j1           | 1.07359     | 1.25632     | 0.226765      | 0.126305  | 0.442595  |
| Stat5a           | 0.112557    | 0.00434268  | 0             | 1         | 1         |
| Naglu_j3         | 2.72427     | 2.93613     | 0.108046      | 0.615944  | 0.848629  |
| Coasy_j4         | 6.80221     | 6.53019     | 0             | 1         | 1         |
| Vps25_j2         | 12.9614     | 14.0497     | 0.116324      | 0.464799  | 0.764951  |
| Rpl27_j1         | 6.70898     | 8.2007      | 0.289654      | 0.0736158 | 0.327003  |
| Rdm1_j2          | 0.380875    | 0           | -1.79769e+308 | 0.0001913 | 0.003698  |
| Rdm1_j3          | 0.0831401   | 0           | -1.79769e+308 | 0.0210729 | 1         |
| Dhx8_j1          | 4.90841     | 5.34765     | 0.12365       | 0.277978  | 0.626763  |
| Cd300lg          | 1.00097     | 0.609155    | -0.716523     | 0.0311616 | 0.190357  |
| BC030867_j1      | 0.095102    | 0.0995799   | 0.0663777     | 0.964912  | 1         |
| Rundc3a_j5       | 0.078988    | 0.072462    | 0             | 1         | 1         |
| Rundc3a_j6       | 1.23674     | 0           | 0             | 1         | 1         |
| Rundc3a_j8       | 0.112877    | 0.201133    | 0             | 1         | 1         |
| Rundc3a_j7       | 26.665      | 36.0721     | 0             | 1         | 1         |
| Adam11_j1        | 3.10992     | 1.01909     | 0             | 1         | 1         |
| Adam11_j3        | 1.6737      | 1.51451     | 0             | 1         | 1         |
| Ccdc103_j2       | 0.165814    | 0           | 0             | 1         | 1         |

|                  |           |             |               |           |           |
|------------------|-----------|-------------|---------------|-----------|-----------|
| Ccdc103_j4       | 0.169107  | 0.112664    | 0             | 1         | 1         |
| Ccdc103_j8       | 0.154733  | 0           | 0             | 1         | 1         |
| Nmt1_j3          | 2.98234   | 3.40732     | 0             | 1         | 1         |
| Acbd4_j8         | 12.7569   | 13.9687     | 0             | 1         | 1         |
| XLOC_004496      | 0.289316  | 0.141068    | -1.03626      | 0.0887128 | 0.365059  |
| Hexim2_j2        | 0.0611922 | 0.0714321   | 0.223225      | 0.864401  | 1         |
| Wnt3             | 0.184414  | 0.0901339   | -1.0328       | 0.128954  | 0.447543  |
| Mettl2_j7        | 0.110189  | 0.204773    | 0.894046      | 0.389863  | 0.716946  |
| Tlk2_j4          | 0.999309  | 0.642145    | -0.638033     | 0.0905646 | 0.369608  |
| Tlk2_j2          | 0.177678  | 0           | -1.79769e+308 | 0.0001632 | 0.0032375 |
| Tlk2_j8          | 7.58748   | 7.23094     | -0.0694377    | 0.65677   | 0.869053  |
| Mrc2_j3          | 0.131343  | 0.0467674   | -1.48976      | 0.0932045 | 1         |
| Tanc2_j5         | 0.0603444 | 0           | -1.79769e+308 | 1.65E-05  | 1         |
| Ace              | 0.156026  | 0.184909    | 0.245033      | 0.665787  | 0.873346  |
| Map3k3_j1        | 1.35241   | 0.514766    | 0             | 1         | 1         |
| Map3k3_j4        | 0.700458  | 0.38633     | 0             | 1         | 1         |
| Tcam1_j1         | 0.158703  | 0.0533372   | -1.57312      | 0.198009  | 0.541125  |
| XLOC_004519      | 0.0890797 | 0.121459    | 0.447307      | 0.570036  | 1         |
| Helz_j5          | 0.597016  | 0.149127    | 0             | 1         | 1         |
| Cog1_j3          | 7.39783   | 6.47458     | 0             | 1         | 1         |
| XLOC_004541      | 0.0744551 | 0.0185046   | -2.00849      | 0.271971  | 1         |
| XLOC_004541      | 0.160723  | 0.211243    | 0.394326      | 0.669007  | 0.874746  |
| XLOC_004541      | 0.0602029 | 0.225339    | 1.90419       | 0.170287  | 0.507195  |
| XLOC_004541      | 0.133516  | 0.675279    | 2.33847       | 0.014093  | 0.110014  |
| Rpl38_j1         | 0.350804  | 0.545422    | 0.636706      | 0.257456  | 0.606278  |
| Rpl38_j6         | 0.429903  | 0.000351547 | -10.2561      | 0.862906  | 0.956568  |
| Rpl38_j7         | 0.163054  | 0.422155    | 1.37243       | 0.0810148 | 0.346508  |
| Ttyh2_j1         | 0.902855  | 0.868206    | 0             | 1         | 1         |
| Dnaic2_j1        | 0.349428  | 0           | 0             | 1         | 1         |
| Dnaic2_j2        | 0.501814  | 0.00606525  | 0             | 1         | 1         |
| Dnaic2_j4        | 0.228391  | 0           | 0             | 1         | 1         |
| XLOC_004545      | 0.162952  | 0.0853117   | -0.933632     | 0.325102  | 0.668265  |
| Gprc5c_j7        | 0.399338  | 0           | 0             | 1         | 1         |
| XLOC_004546      | 0.147024  | 0.207027    | 0             | 1         | 1         |
| Cd300a_j4        | 0.0910903 | 0.0353589   | 0             | 1         | 1         |
| 2310067B10Rik_j8 | 2.0719    | 1.93468     | 0             | 1         | 1         |
| Itgb4_j4         | 0.174287  | 0.273683    | 0.651039      | 0.142681  | 0.469414  |
| Itgb4_j2         | 0.0436684 | 0.0878105   | 1.0078        | 0.18908   | 1         |
| Itgb4_j5         | 0.303025  | 0.39772     | 0.392319      | 0.248692  | 0.596177  |
| Fam100b_j2       | 5.1516    | 6.35974     | 0.303946      | 0.0441218 | 0.239316  |
| Fam100b_j1       | 1.23751   | 0.000578766 | -11.0622      | 0.624347  | 0.853348  |
| XLOC_004572      | 0.12072   | 0.105012    | -0.20112      | 0.808969  | 1         |
| Sphk1_j4         | 0.16635   | 0.278207    | 0.741942      | 0.34117   | 0.681074  |
| Mfsd11_j2        | 0.549587  | 0.482048    | -0.189171     | 0.52271   | 0.798994  |
| Gm11734_j2       | 0.138166  | 0.107301    | -0.364732     | 0.619158  | 0.850509  |
| Tnrc6c_j2        | 0.523036  | 0.509289    | -0.0384253    | 0.879745  | 0.961537  |
| Tnrc6c           | 1.01957   | 0.512024    | -0.993676     | 2.13E-05  | 0.000584  |

|                  |           |                 |            |           |           |
|------------------|-----------|-----------------|------------|-----------|-----------|
| Tnrc6c_j4        | 0.146199  | 0.242612        | 0.73071    | 0.0620022 | 0.294618  |
| Tnrc6c_j6        | 0.131024  | 0.0574765       | -1.18879   | 0.160932  | 1         |
| Tmc8_j2          | 0.0769079 | 0 -1.79769e+308 |            | 0.0056116 | 1         |
| Tmc8_j13         | 0.119228  | 0 -1.79769e+308 |            | 0.0432881 | 1         |
| Afmid_j2         | 0.422406  | 0.418448        | -0.013584  | 0.975098  | 0.992833  |
| Afmid_j1         | 0.220706  | 0 -1.79769e+308 |            | 6.37E-05  | 0.0014677 |
| Birc5_j1         | 0.122921  | 0 -1.79769e+308 |            | 0.003486  | 1         |
| C1qtnf1_j4       | 0.0669015 | 0.0134101       | 0          | 1         | 1         |
| Engase_j2        | 0.139763  | 0.155273        | 0.151821   | 0.810347  | 0.937876  |
| Cbx2_j4          | 0.504986  | 0.262267        | -0.945208  | 0.0350625 | 0.205925  |
| Gaa_j1           | 2.24668   | 1.99028         | -0.174825  | 0.322067  | 0.665132  |
| Gaa_j2           | 3.61482   | 11.5665         | 1.67796    | 0         | 0         |
| Slc26a11_j1      | 0.354892  | 0.190622        | 0          | 1         | 1         |
| XLOC_004601      | 0.126796  | 0.15875         | 0          | 1         | 1         |
| Rnf213_j2        | 0.0485949 | 0.0603297       | 0          | 1         | 1         |
| Rnf213_j3        | 0.0996577 | 0.126307        | 0          | 1         | 1         |
| A730011L01Rik_j1 | 0.229523  | 0.146634        | 0          | 1         | 1         |
| A730011L01Rik    | 2.42063   | 2.86228         | 0          | 1         | 1         |
| Bahcc1_j6        | 0.232869  | 4.90E-05        | -12.2136   | 0.775342  | 0.923761  |
| Bahcc1_j5        | 0.134007  | 0 -1.79769e+308 |            | 2.07E-10  | 1         |
| Hgs_j3           | 2.52494   | 2.49144         | -0.0192674 | 0.882345  | 0.962629  |
| Hgs_j8           | 4.56168   | 5.2993          | 0.216235   | 0.0754106 | 0.331468  |
| Slc25a10_j2      | 5.01363   | 4.83296         | -0.0529501 | 0.801518  | 0.933853  |
| Anapc11_j4       | 49.9122   | 53.6925         | 0.105328   | 0.35837   | 0.693844  |
| Anapc11_j5       | 4.44711   | 5.04            | 0.180555   | 0.177904  | 0.517237  |
| Aspscr1_j3       | 2.22442   | 3.3861          | 0          | 1         | 1         |
| Tbcd_j3          | 0.149945  | 0.479398        | 0          | 1         | 1         |
| Limk2_j2         | 6.13157   | 9.44008         | 0          | 1         | 1         |
| Limk2_j4         | 14.714    | 13.9456         | 0          | 1         | 1         |
| Limk2_j3         | 2.60454   | 5.75358         | 0          | 1         | 1         |
| Inpp5j_j1        | 5.9298    | 5.46287         | 0          | 1         | 1         |
| Mtfp1_j1         | 0.105159  | 0.0231573       | -2.18304   | 0.315031  | 1         |
| Sec14l2_j1       | 1.69251   | 1.86131         | 0.137154   | 0.617723  | 0.84955   |
| Sec14l2          | 7.76128   | 7.37147         | -0.0743414 | 0.553926  | 0.817269  |
| Mtmr3_j7         | 0.466189  | 2.36858         | 0          | 1         | 1         |
| Mtmr3_j8         | 3.42472   | 3.37997         | 0          | 1         | 1         |
| Nefh_j2          | 438.261   | 281.441         | 0          | 1         | 1         |
| Nefh_j6          | 0.16405   | 0.153682        | 0          | 1         | 1         |
| Ewsr1_j6         | 1.92154   | 2.05897         | 0          | 1         | 1         |
| Ewsr1_j5         | 2.18341   | 0.894689        | 0          | 1         | 1         |
| Kremen1_j1       | 0.569904  | 0 -1.79769e+308 |            | 6.82E-15  | 1.33E-12  |
| Urgcp_j2         | 8.18691   | 8.47363         | 0          | 1         | 1         |
| Pgam2_j2         | 0.638873  | 0.732243        | 0          | 1         | 1         |
| Pgam2_j1         | 0.0535623 | 0               | 0          | 1         | 1         |
| Polm_j11         | 0.991804  | 0.872594        | -0.184745  | 0.553755  | 0.817269  |
| Myl7_j1          | 0.240282  | 0.163029        | -0.559596  | 0.515966  | 0.794687  |
| Camk2b_j7        | 0.247994  | 0.2582          | 0          | 1         | 1         |

|                  |           |                 |           |           |           |
|------------------|-----------|-----------------|-----------|-----------|-----------|
| Camk2b_j6        | 0.175218  | 0               | 0         | 1         | 1         |
| Camk2b_j3        | 0.964613  | 1.2892          | 0         | 1         | 1         |
| Nudcd3_j3        | 14.98     | 15.9272         | 0         | 1         | 1         |
| Myo1g_j6         | 0.0526661 | 0 -1.79769e+308 | 0.0836123 |           | 1         |
| Nacad_j6         | 20.6013   | 17.7855         | 0         | 1         | 1         |
| Tns3_j6          | 3.93515   | 5.6596          | 0         | 1         | 1         |
| Zpbp_j1          | 0.163105  | 0.0830369       | -0.973979 | 0.151296  | 0.482368  |
| Gm12000          | 0.131855  | 0.0449102       | -1.55384  | 0.25187   | 1         |
| Grb10_j5         | 0.16739   | 0.154575        | 0         | 1         | 1         |
| Sec61g_j2        | 0.122546  | 0.206553        | 0.753184  | 0.395785  | 0.720791  |
| Meis1_j1         | 0.446409  | 0.303182        | -0.558181 | 0.228774  | 0.57584   |
| XLOC_004704      | 0.0679088 | 0.0691529       | 0.0261909 | 0.977283  | 1         |
| XLOC_004704      | 0.19204   | 0.153021        | -0.327676 | 0.775683  | 0.923959  |
| Actr2_j3         | 25.1757   | 5.4073          | 0         | 1         | 1         |
| Cep68_j2         | 1.74846   | 0.555332        | -1.65466  | 3.30E-12  | 4.35E-10  |
| Aftph_j1         | 1.47222   | 1.19683         | -0.298769 | 0.144117  | 0.471077  |
| 1110067D22Rik_j2 | 1.69833   | 0.000418381     | 0         | 1         | 1         |
| Mdh1_j2          | 202.8     | 173.038         | 0         | 1         | 1         |
| Mdh1_j3          | 65.3432   | 82.9579         | 0         | 1         | 1         |
| Ehbp1_j12        | 0.645283  | 0.557254        | 0         | 1         | 1         |
| Ehbp1_j11        | 0.915077  | 0.910796        | 0         | 1         | 1         |
| Pex13_j2         | 5.74674   | 5.65814         | 0         | 1         | 1         |
| Eml6_j6          | 0.267232  | 0.112527        | 0         | 1         | 1         |
| Eml6             | 0.813067  | 0.357089        | 0         | 1         | 1         |
| Spnb2_j6         | 9.16562   | 5.41074         | -0.760407 | 3.79E-12  | 4.94E-10  |
| 4930505A04Rik_j2 | 0.070545  | 4.94E-05        | -10.4786  | 0.972612  | 1         |
| Erlec1_j1        | 9.3028    | 8.90841         | 0         | 1         | 1         |
| XLOC_004745      | 0.220333  | 0.0440728       | -2.32172  | 0.0815426 | 0.34785   |
| Fgf18_j1         | 1.16931   | 0.890556        | -0.392884 | 0.411034  | 0.730555  |
| Fgf18_j2         | 0.733769  | 0.580286        | -0.338561 | 0.476351  | 0.77206   |
| Npm1_j1          | 0.654165  | 0 -1.79769e+308 | 7.30E-13  | 1.06E-10  |           |
| Kcnip1_j4        | 0.171807  | 0 -1.79769e+308 | 0.0094721 | 0.0822878 |           |
| Kcnip1_j3        | 1.52264   | 0 -1.79769e+308 | 2.77E-13  | 4.35E-11  |           |
| XLOC_004760      | 0.184744  | 0.0505098       | -1.8709   | 0.0501089 | 0.258665  |
| Dock2_j4         | 0.153463  | 0.0684298       | -1.1652   | 0.377481  | 0.70922   |
| Dock2_j9         | 0.154595  | 4.26E-05        | -11.8244  | 0.977284  | 0.993385  |
| Dock2_j11        | 0.161339  | 0.163272        | 0.0171775 | 0.98542   | 0.995689  |
| Ccdc99_j4        | 0.0472435 | 0 -1.79769e+308 | 0.0326152 |           | 1         |
| Wwc1_j1          | 0.717322  | 0.134394        | -2.41615  | 0.0132992 | 0.105753  |
| Wwc1             | 0.320214  | 0.106667        | -1.58593  | 0.0036407 | 0.0401553 |
| Od2_j5           | 0.0550672 | 0 -1.79769e+308 | 0.0003029 |           | 1         |
| Gabrg2_j7        | 0.854154  | 1.00295         | 0         | 1         | 1         |
| Gabra1_j1        | 2.99967   | 2.80245         | 0         | 1         | 1         |
| Ublcp1_j6        | 0.0839909 | 0.00997413      | 0         | 1         | 1         |
| Lsm11_j2         | 0.326037  | 0               | 0         | 1         | 1         |
| Cyfip2_j5        | 5.63034   | 6.09675         | 0         | 1         | 1         |
| Sgcd_j5          | 1.74533   | 0.547297        | 0         | 1         | 1         |

|                   |           |            |               |           |           |
|-------------------|-----------|------------|---------------|-----------|-----------|
| Sgcd_j6           | 0.743394  | 0.578895   | 0             | 1         | 1         |
| Trim41_j2         | 0.648256  | 0          | -1.79769e+308 | 1.44E-05  | 0.0004244 |
| Trim41            | 3.95602   | 3.853      | -0.038066     | 0.790591  | 0.930189  |
| Irgm1_j1          | 1.2112    | 0.501822   | -1.27119      | 0.0052938 | 0.0528825 |
| Tgtp2             | 1.11164   | 0.496889   | -1.16169      | 0.00761   | 0.0701212 |
| 9930111J21Rik2_j1 | 0.212839  | 0.159815   | -0.41336      | 0.56668   | 0.824684  |
| Sqstm1_j6         | 0.270386  | 0.151156   | 0             | 1         | 1         |
| Sqstm1_j7         | 0.295135  | 0          | 0             | 1         | 1         |
| Maml1_j3          | 0.425137  | 0.0172995  | -4.61912      | 0.0230657 | 0.155463  |
| Rufy1_j2          | 0.741167  | 0.315873   | -1.23045      | 0.0179718 | 0.130789  |
| Gm12199           | 0.137224  | 0.0450119  | -1.60816      | 0.12821   | 0.44626   |
| Zfp354c_j3        | 2.21484   | 1.69755    | 0             | 1         | 1         |
| Zfp2_j4           | 0.259852  | 0.175951   | -0.562514     | 0.272827  | 0.621704  |
| Hnrnpab_j2        | 0.139269  | 0.453103   | 1.70196       | 9.43E-09  | 6.64E-07  |
| Hnrnpab_j1        | 0.470063  | 0.191332   | -1.29678      | 2.75E-05  | 0.0007185 |
| Sec24a_j6         | 0.140532  | 0.137533   | -0.0311156    | 0.953219  | 0.986435  |
| Phf15_j1          | 0.118465  | 0.0371752  | -1.67205      | 0.0609226 | 1         |
| Phf15             | 0.249742  | 0          | -1.79769e+308 | 2.16E-10  | 2.03E-08  |
| Ube2b_j1          | 18.878    | 10.7563    | 0             | 1         | 1         |
| Tcf7_j7           | 0.155246  | 0.177795   | 0.195663      | 0.772912  | 0.922948  |
| Tcf7_j4           | 0.0856718 | 0.0530175  | -0.692352     | 0.543716  | 1         |
| Hspa4_j4          | 3.01099   | 5.40124    | 0             | 1         | 1         |
| Hspa4_j3          | 18.5574   | 18.959     | 0             | 1         | 1         |
| Rad50_j3          | 0.109306  | 0.202926   | 0.892582      | 0.0716526 | 0.321892  |
| Slc22a5_j2        | 0.929097  | 0.302631   | 0             | 1         | 1         |
| Cdc42se2_j4       | 2.59462   | 1.68864    | 0             | 1         | 1         |
| Lymr7_j3          | 1.95862   | 1.78969    | -0.130127     | 0.485409  | 0.777011  |
| Anxa6_j1          | 76.175    | 101.783    | 0             | 1         | 1         |
| Ccdc69_j1         | 0.121902  | 0.00721457 | -4.07866      | 0.359277  | 1         |
| Slc36a2_j1        | 0.632877  | 0.576766   | -0.133939     | 0.800708  | 0.933638  |
| Sparc             | 8.88921   | 9.2175     | 0             | 1         | 1         |
| Fam114a2_j1       | 6.57335   | 6.24279    | 0             | 1         | 1         |
| Gemin5            | 1.04154   | 1.34715    | 0             | 1         | 1         |
| XLOC_004853       | 0.156387  | 0.279889   | 0.839738      | 0.217376  | 0.563545  |
| Zfp39             | 0.712704  | 0.667098   | -0.0954048    | 0.686544  | 0.883244  |
| Rnf187_j6         | 3.47443   | 3.16039    | -0.136671     | 0.554054  | 0.817298  |
| Guk1              | 57.599    | 65.5933    | 0.187504      | 0.0649703 | 0.303396  |
| Snap47_j1         | 54.1588   | 58.9152    | 0.121444      | 0.186486  | 0.527212  |
| Zkscan17          | 0         | 0.0831615  | 0             | 1         | 1         |
| Rasd1             | 0.310336  | 0.36355    | 0             | 1         | 1         |
| Tom1l2_j1         | 2.04576   | 1.45213    | 0             | 1         | 1         |
| Flii_j2           | 10.6364   | 13.7767    | 0.373219      | 0.0160799 | 0.120789  |
| Flii_j3           | 0.140933  | 0.0204183  | -2.78708      | 0.0282948 | 0.178644  |
| Flii_j7           | 0.885014  | 1.60256    | 0.856605      | 0.0031531 | 0.0358821 |
| Top3a_j3          | 0.224973  | 0.190569   | -0.239439     | 0.62533   | 0.853869  |
| Gm16515_j2        | 0.88386   | 1.70259    | 0.945843      | 8.73E-05  | 0.0019086 |
| Aldh3a2_j2        | 6.26699   | 6.35365    | 0             | 1         | 1         |



|                  |           |           |               |           |           |
|------------------|-----------|-----------|---------------|-----------|-----------|
| Slc47a1_j2       | 0.292476  | 0         | -1.79769e+308 | 0.0001739 | 0.0034207 |
| Rnf112_j7        | 4.25616   | 6.23288   | 0             | 1         | 1         |
| Rnf112_j8        | 4.85176   | 4.17711   | 0             | 1         | 1         |
| Rnf112_j10       | 0.172166  | 0         | 0             | 1         | 1         |
| Mapk7_j6         | 1.85501   | 2.03173   | 0.131285      | 0.574098  | 0.827866  |
| Slc5a10_j1       | 0.0881388 | 0.0161672 | -2.44671      | 0.294958  | 1         |
| Slc5a10_j2       | 0.140111  | 0.0390093 | -1.84468      | 0.0861558 | 0.358644  |
| Prpsap2_j5       | 0.139515  | 0.0580122 | -1.266        | 0.407089  | 0.727764  |
| Ncor1_j10        | 2.22498   | 1.90069   | 0             | 1         | 1         |
| Ncor1_j9         | 0.86874   | 0.699156  | 0             | 1         | 1         |
| Zfp287_j1        | 0.20376   | 0.145259  | -0.48825      | 0.210001  | 0.554523  |
| Arhgap44_j4      | 0.1213    | 0.0484907 | 0             | 1         | 1         |
| Map2k4_j5        | 1.75848   | 7.69783   | 0             | 1         | 1         |
| Dnahc9_j12       | 0.127072  | 0         | -1.79769e+308 | 0.0018106 | 1         |
| Dnahc9           | 0.126064  | 0.0618041 | -1.02839      | 0.158592  | 1         |
| Ndel1_j1         | 15.6418   | 21.6899   | 0             | 1         | 1         |
| Arhgef15_j2      | 0.10265   | 0.0625165 | -0.715429     | 0.363856  | 1         |
| Pfas_j5          | 0.682685  | 0.453748  | 0             | 1         | 1         |
| Pfas_j6          | 0.46371   | 0.537102  | 0             | 1         | 1         |
| Dnahc2_j2        | 0.0971081 | 0.069813  | -0.476096     | 0.799045  | 1         |
| Dnahc2_j4        | 0.204528  | 0.128301  | -0.672764     | 0.442788  | 0.750909  |
| Dnahc2_j5        | 0.182373  | 0.0874675 | -1.06008      | 0.126113  | 0.442293  |
| Dnahc2_j13       | 0.0935021 | 0.0451694 | -1.04965      | 0.312686  | 1         |
| Efnb3_j3         | 0.103486  | 0         | -1.79769e+308 | 0.002039  | 1         |
| Eif4a1_j1        | 0.0907993 | 0.683002  | 0             | 1         | 1         |
| Eif4a1_j3        | 0.505231  | 0.538618  | 0             | 1         | 1         |
| Eif4a1_j2        | 0.446454  | 0.409268  | 0             | 1         | 1         |
| Tnfsf12          | 8.54056   | 9.31476   | 0.125188      | 0.331401  | 0.673024  |
| Chrn1_j1         | 0.395474  | 0.207538  | 0             | 1         | 1         |
| Fgf11_j2         | 0.545191  | 0.40507   | -0.42859      | 0.243283  | 0.590533  |
| Nlgn2_j2         | 0.0783317 | 0         | -1.79769e+308 | 0.0024633 | 1         |
| Acap1_j2         | 0.132901  | 0.0909748 | -0.546807     | 0.567898  | 1         |
| 2810408A11Rik_j1 | 0.0763189 | 0.0201684 | -1.91994      | 0.256776  | 1         |
| Eif5a_j4         | 0.269171  | 1.00593   | 0             | 1         | 1         |
| Slc2a4_j2        | 0.0933765 | 0.027762  | -1.74995      | 0.273887  | 1         |
| Acadvl_j2        | 0.626606  | 0.395334  | -0.664488     | 0.15142   | 0.482514  |
| Acadvl_j1        | 0.366741  | 0.460562  | 0.328636      | 0.459436  | 0.761406  |
| Slc16a13_j4      | 0.117756  | 0.0435741 | -1.43425      | 0.25455   | 1         |
| Bcl6b_j2         | 0         | 0.049454  | 1.79769e+308  | 0.121878  | 1         |
| O610010K14Rik_j5 | 0.233327  | 0         | -1.79769e+308 | 0.0008679 | 0.0127545 |
| Cxcl16_j1        | 0.679003  | 0.627226  | -0.114433     | 0.65077   | 0.86597   |
| Vmo1_j1          | 0.0644027 | 0.0175383 | -1.87661      | 0.406798  | 1         |
| A430084P05Rik    | 0.117506  | 0.207401  | 0.81969       | 0.255776  | 0.604561  |
| Nup88_j2         | 2.5971    | 2.62224   | 0             | 1         | 1         |
| Pitpm3_j9        | 0.176643  | 0.0431365 | -2.03385      | 0.0371615 | 0.213498  |
| Slc13a5_j2       | 0.136063  | 0         | -1.79769e+308 | 0.0121664 | 1         |
| Spns2_j3         | 0.214165  | 0.30675   | 0             | 1         | 1         |

|              |           |                 |           |           |           |
|--------------|-----------|-----------------|-----------|-----------|-----------|
| AK076313_j1  | 0.45604   | 0.207833        | -1.13374  | 0.186214  | 0.526701  |
| Tmem93       | 9.27434   | 8.77412         | 0         | 1         | 1         |
| Ctns_j2      | 2.12083   | 3.12609         | 0         | 1         | 1         |
| mKIAA1039_j3 | 23.1182   | 20.8764         | 0         | 1         | 1         |
| mKIAA1039_j4 | 0.191354  | 0.197025        | 0         | 1         | 1         |
| Pafah1b1_j2  | 2.14202   | 0.533163        | 0         | 1         | 1         |
| Sgsm2        | 1.89729   | 1.61809         | 0         | 1         | 1         |
| Srr          | 4.32149   | 2.52811         | 0         | 1         | 1         |
| Dph1_j1      | 1.44595   | 0.927779        | 0         | 1         | 1         |
| Rpa1_j1      | 0.6701    | 0.706368        | 0         | 1         | 1         |
| Rph3al_j3    | 0.144126  | 0.072802        | -0.985286 | 0.531159  | 0.803433  |
| Vps53_j1     | 8.04284   | 12.7017         | 0         | 1         | 1         |
| Nxn_j3       | 4.74333   | 6.82555         | 0         | 1         | 1         |
| Abr_j11      | 0.232869  | 0               | 0         | 1         | 1         |
| Abr_j10      | 0.234855  | 0.383534        | 0         | 1         | 1         |
| Gosr1_j1     | 1.27605   | 0.472981        | 0         | 1         | 1         |
| Efcab5_j7    | 0.0802745 | 0.0842907       | 0.0704326 | 1         | 1         |
| Efcab5_j9    | 0.0560907 | 0 -1.79769e+308 | 0.120401  | 1         | 1         |
| Taok1_j8     | 8.30068   | 8.1727          | 0         | 1         | 1         |
| Taok1_j9     | 0.351393  | 0.755099        | 0         | 1         | 1         |
| Pipox_j6     | 0.308227  | 0.585849        | 0.926537  | 0.036944  | 0.21277   |
| Pipox_j8     | 0.0859942 | 0.0789288       | -0.123688 | 0.918726  | 1         |
| Nek8_j3      | 0.586161  | 0.67473         | 0         | 1         | 1         |
| Supt6h_j1    | 11.1702   | 12.7456         | 0         | 1         | 1         |
| Nlk_j1       | 1.98991   | 2.18496         | 0.134907  | 0.564628  | 0.823408  |
| Lgals9_j2    | 1.0286    | 0               | 0         | 1         | 1         |
| Lgals9_j3    | 29.1414   | 29.2736         | 0         | 1         | 1         |
| Ksr1_j8      | 0.795339  | 0.558285        | -0.510568 | 0.0646052 | 0.302125  |
| Wsb1_j3      | 0.216374  | 0.139436        | 0         | 1         | 1         |
| Omg_j1       | 3.83354   | 1.58397         | -1.27513  | 1.60E-05  | 0.0004607 |
| Evi2b        | 0.456753  | 0.463276        | 0.0204559 | 0.957813  | 0.987996  |
| Accn1_j2     | 2.27447   | 1.37831         | 0         | 1         | 1         |
| Accn1_j7     | 14.5967   | 12.5691         | 0         | 1         | 1         |
| XLOC_005055  | 0.189455  | 0.114751        | -0.723351 | 0.240177  | 0.587471  |
| Cct6b_j8     | 0.143666  | 0.327166        | 1.1873    | 0.0221199 | 0.151056  |
| Sifn8_j2     | 0.109882  | 0.11887         | 0         | 1         | 1         |
| Ccl9_j1      | 0.16696   | 0 -1.79769e+308 | 0.0093788 | 0.081726  | 0.081726  |
| Dusp14_j2    | 0.435366  | 0.664367        | 0.609751  | 0.213703  | 0.558975  |
| Tada2a_j2    | 0.515888  | 0.654029        | 0         | 1         | 1         |
| Mrm1_j3      | 0.292994  | 0.181369        | -0.691948 | 0.262616  | 0.611643  |
| Dhrs11_j5    | 0.0674054 | 0 -1.79769e+308 | 0.0372491 | 1         | 1         |
| Dhrs11_j4    | 0.565141  | 0.373961        | -0.595725 | 0.193576  | 0.535854  |
| Ggnbp2_j12   | 2.2348    | 2.27889         | 0.0281805 | 0.910728  | 0.97197   |
| Pigw         | 0.943939  | 1.17299         | 0.313429  | 0.269868  | 0.619016  |
| Usp32_j3     | 7.16174   | 7.58418         | 0         | 1         | 1         |
| Appbp2_j1    | 0.88892   | 0.539416        | 0         | 1         | 1         |
| Ints2_j1     | 1.30191   | 0.340523        | -1.9348   | 4.55E-14  | 7.89E-12  |

|                  |           |           |               |           |           |
|------------------|-----------|-----------|---------------|-----------|-----------|
| Ints2_j2         | 0.273939  | 0         | -1.79769e+308 | 1.36E-15  | 2.93E-13  |
| Tmem49_j5        | 0.212797  | 0.0332814 | 0             | 1         | 1         |
| Tmem49_j6        | 0.137888  | 0         | 0             | 1         | 1         |
| Cltc_j1          | 30.7777   | 34.6451   | 0             | 1         | 1         |
| Ppm1e_j1         | 2.54131   | 3.69337   | 0             | 1         | 1         |
| Nme2             | 3.4273    | 4.41504   | 0.365353      | 0.106217  | 0.404647  |
| Nme1_j3          | 1.24867   | 1.27405   | 0.0290324     | 0.961167  | 0.988989  |
| Epn3_j3          | 15.6739   | 11.9756   | 0             | 1         | 1         |
| Rsad1            | 0.128658  | 0.213534  | 0             | 1         | 1         |
| Acsf2_j2         | 0.231847  | 0.188622  | -0.297676     | 0.790735  | 0.930268  |
| Pdk2_j1          | 2.28988   | 1.72784   | -0.406304     | 0.009357  | 0.0815807 |
| Itga3_j7         | 11.5341   | 17.0698   | 0.56555       | 1.33E-05  | 0.0003969 |
| Dlx4_j1          | 0.147963  | 0.068171  | -1.11801      | 0.124963  | 0.44033   |
| Ngfr_j4          | 5.26493   | 0.862384  | 0             | 1         | 1         |
| AK027957_j3      | 0.447849  | 0.688063  | 0.619529      | 0.0323814 | 0.195407  |
| Nfe2l1           | 19.3217   | 7.53882   | 0             | 1         | 1         |
| Nfe2l1           | 1.45168   | 0.591902  | 0             | 1         | 1         |
| Cdk5rap3_j4      | 1.71452   | 1.51424   | -0.179211     | 0.637762  | 0.859778  |
| Tbkbp1_j7        | 0.014094  | 0.0978309 | 0             | 1         | 1         |
| Kpnb1_j1         | 8.2448    | 10.2212   | 0             | 1         | 1         |
| Npepps_j2        | 24.3983   | 28.2562   | 0             | 1         | 1         |
| Srcin1_j10       | 0.313463  | 0.532756  | 0             | 1         | 1         |
| Srcin1_j11       | 0.957443  | 0.71753   | 0             | 1         | 1         |
| Srcin1_j12       | 1.32149   | 1.15259   | 0             | 1         | 1         |
| Srcin1_j13       | 0.392509  | 0.0825914 | 0             | 1         | 1         |
| Pcgf2_j6         | 0.682811  | 0.792094  | 0.214185      | 0.629688  | 0.85615   |
| Pcgf2_j7         | 0.116321  | 0.115862  | -0.00571085   | 0.993734  | 1         |
| Pip4k2b_j4       | 12.9468   | 10.2644   | 0             | 1         | 1         |
| Rpl23_j11        | 1.68749   | 1.12789   | -0.581258     | 0.209586  | 0.553869  |
| Fbxo47_j1        | 0.121494  | 0.0376741 | -1.68924      | 0.0763135 | 1         |
| Plxdc1_j6        | 0.85387   | 0.125681  | -2.76425      | 5.65E-05  | 0.0013229 |
| Arl5c_j1         | 0.283206  | 0         | -1.79769e+308 | 0.0026156 | 0.0309359 |
| Arl5c_j2         | 0.14658   | 0.23224   | 0.663928      | 0.373601  | 0.706436  |
| Arl5c_j4         | 0.0678118 | 0         | -1.79769e+308 | 0.0769181 | 1         |
| Stac2_j1         | 6.31599   | 6.28353   | -0.00743373   | 0.966488  | 0.990403  |
| Med1_j3          | 0.158974  | 0         | 0             | 1         | 1         |
| 1810046J19Rik_j2 | 39.1516   | 45.5476   | 0             | 1         | 1         |
| Med24_j7         | 2.10915   | 2.48722   | 0             | 1         | 1         |
| Top2a_j7         | 0.0644677 | 0.0183317 | -1.81423      | 0.127315  | 1         |
| Top2a            | 0.0833473 | 0.0842835 | 0.0161155     | 0.980791  | 1         |
| Smarce1_j1       | 0.181797  | 0.366178  | 0             | 1         | 1         |
| Smarce1_j4       | 0.368359  | 0.24542   | -0.585861     | 0.208278  | 0.552321  |
| Smarce1_j5       | 0.154573  | 0.276136  | 0.837088      | 0.265047  | 0.613897  |
| Krt27_j2         | 1.18728   | 1.39039   | 0.227837      | 0.526191  | 0.800979  |
| Krt10_j2         | 1.62406   | 1.34383   | -0.273246     | 0.376392  | 0.708482  |
| Hap1_j5          | 0.111277  | 0.161854  | 0             | 1         | 1         |
| Hap1_j2          | 0.0972685 | 0.537837  | 0             | 1         | 1         |

|                  |           |            |               |           |           |
|------------------|-----------|------------|---------------|-----------|-----------|
| Leprel4_j1       | 1.01925   | 1.13351    | 0.153295      | 0.58193   | 0.832581  |
| Leprel4_j2       | 0.0564235 | 0          | -1.79769e+308 | 0.108835  | 1         |
| Dnajc7           | 1.29434   | 1.73902    | 0.426052      | 0.0133963 | 0.106204  |
| Ghdc_j1          | 2.14261   | 2.15992    | 0             | 1         | 1         |
| Stat5b_j1        | 2.28816   | 3.55946    | 0             | 1         | 1         |
| Psmc3ip_j3       | 0.138039  | 0.087954   | 0             | 1         | 1         |
| Plekh3_j3        | 0.47857   | 0.960464   | 1.005         | 0.0030729 | 0.0351005 |
| Plekh3_j8        | 1.11541   | 0.68195    | -0.709841     | 0.0458138 | 0.244895  |
| 1700113122Rik_j2 | 0.148487  | 0.0898046  | -0.725472     | 0.5431    | 0.810722  |
| Vat1_j2          | 0.199032  | 0          | 0             | 1         | 1         |
| Etv4_j8          | 0.107964  | 0.00734526 | -3.87759      | 0.276356  | 1         |
| Etv4_j7          | 0.358319  | 0.160969   | -1.15446      | 0.111145  | 0.414977  |
| Meox1_j1         | 0.189848  | 0          | -1.79769e+308 | 0.002834  | 0.0329122 |
| Mpp2_j1          | 0.62311   | 0.334293   | 0             | 1         | 1         |
| Lsm12_j2         | 0.0667119 | 0          | -1.79769e+308 | 0.0536725 | 1         |
| Itga2b_j2        | 0.370666  | 0.178993   | -1.05021      | 0.0952752 | 0.381127  |
| Itga2b_j3        | 0.0667385 | 0.017576   | -1.92492      | 0.247659  | 1         |
| Itga2b_j8        | 0.0838043 | 0.146382   | 0.804641      | 0.340108  | 1         |
| Gpatch8_j6       | 1.80098   | 0.544888   | 0             | 1         | 1         |
| AK144330_j1      | 0.119531  | 0.11601    | -0.0431408    | 0.977329  | 1         |
| 2810433D01Rik    | 0.199699  | 0.182037   | -0.133602     | 0.85868   | 0.95523   |
| Ccdc43_j2        | 6.47202   | 6.21473    | -0.058525     | 0.670261  | 0.875235  |
| Gjc1_j2          | 0.277776  | 0.117306   | -1.24364      | 0.154903  | 0.488149  |
| Gjc1_j3          | 0.738433  | 1.33164    | 0.850667      | 0.006995  | 0.0658155 |
| Gjc1             | 0.130765  | 0.13113    | 0.00402499    | 0.995485  | 1         |
| Gfap             | 0.0998918 | 0.205382   | 1.03987       | 0.116394  | 0.424447  |
| Plcd3            | 0.76905   | 0.829487   | 0             | 1         | 1         |
| Map3k14_j3       | 0.112413  | 0          | -1.79769e+308 | 0.0001347 | 1         |
| Arhgap27_j3      | 0.383016  | 0.165288   | 0             | 1         | 1         |
| Arhgap27_j4      | 0.692392  | 0.203485   | 0             | 1         | 1         |
| Gosr2_j4         | 1.40369   | 0.527346   | 0             | 1         | 1         |
| Gosr2_j5         | 0.376661  | 0.568222   | 0             | 1         | 1         |
| Nsf_j2           | 3.37276   | 0.115564   | 0             | 1         | 1         |
| Nsf_j3           | 3.67315   | 4.45173    | 0             | 1         | 1         |
| 1700081L11Rik_j8 | 2.82051   | 2.69162    | 0             | 1         | 1         |
| XLOC_005265      | 0.194438  | 0.0501515  | -1.95495      | 0.328537  | 0.671065  |
| Cyb561_j1        | 13.745    | 16.3671    | 0             | 1         | 1         |
| Scn4a_j5         | 0.200106  | 0.0480723  | 0             | 1         | 1         |
| Icam2_j2         | 0.177351  | 0          | -1.79769e+308 | 0.0122667 | 0.0997838 |
| Ern1_j3          | 0.18095   | 0          | 0             | 1         | 1         |
| Tex2_j3          | 1.15859   | 1.00657    | 0             | 1         | 1         |
| Pecam1_j3        | 0.738457  | 0.808413   | 0             | 1         | 1         |
| Smurf2_j4        | 1.09522   | 0.808546   | 0             | 1         | 1         |
| Bptf_j7          | 1.01523   | 0.625209   | -0.699391     | 0.0003832 | 0.0065481 |
| Bptf_j10         | 0.364593  | 0.1002     | -1.8634       | 6.51E-06  | 0.0002134 |
| Pitpnc1_j3       | 0.55681   | 0          | 0             | 1         | 1         |
| Prkca_j4         | 14.8728   | 12.7754    | 0             | 1         | 1         |

|                  |           |            |               |           |           |
|------------------|-----------|------------|---------------|-----------|-----------|
| Slc16a6          | 1.69899   | 1.69267    | 0             | 1         | 1         |
| Fam20a           | 1.27464   | 1.05618    | -0.271231     | 0.296463  | 0.643089  |
| XLOC_005303      | 0.231689  | 0          | -1.79769e+308 | 3.52E-07  | 1.63E-05  |
| D11Wsu99e_j1     | 6.77028   | 6.90233    | 0             | 1         | 1         |
| Cdc42ep4_j2      | 2.96268   | 3.64782    | 0             | 1         | 1         |
| Sdk2_j3          | 0.0925388 | 0.0232283  | -1.99418      | 0.0890722 | 1         |
| Cd300lh          | 0.241559  | 0.366665   | 0.602085      | 0.469681  | 0.76771   |
| Grin2c_j1        | 0.225443  | 0.0914383  | -1.30189      | 0.150511  | 0.480998  |
| C630004H02Rik    | 1.14971   | 0.149338   | 0             | 1         | 1         |
| Gga3_j4          | 2.69598   | 2.56617    | 0             | 1         | 1         |
| Grb2_j3          | 7.56831   | 7.34388    | 0             | 1         | 1         |
| Caskin2_j4       | 0.404324  | 0.521073   | 0             | 1         | 1         |
| Wbp2_j2          | 0.485181  | 0.439792   | 0             | 1         | 1         |
| Fbf1_j8          | 0.0606667 | 0          | 0             | 1         | 1         |
| Fbf1_j10         | 0.925118  | 0.571189   | 0             | 1         | 1         |
| Acox1_j4         | 18.5028   | 21.2479    | 0             | 1         | 1         |
| Exoc7_j6         | 0.331192  | 0.373702   | 0             | 1         | 1         |
| Rnf157_j2        | 0.0676462 | 0.00410111 | 0             | 1         | 1         |
| Prpsap1_j1       | 1.56245   | 2.10963    | 0             | 1         | 1         |
| Ube2o_j6         | 0.0550042 | 0.0225658  | 0             | 1         | 1         |
| Rhbdf2_j3        | 0.566103  | 0.50272    | -0.171308     | 0.755605  | 0.915717  |
| St6galnac2_j2    | 0.123037  | 0.0967455  | -0.346823     | 0.779042  | 1         |
| Tmc6_j2          | 9.84713   | 8.33163    | 0             | 1         | 1         |
| Cant1_j1         | 0.131206  | 0.13275    | 0             | 1         | 1         |
| Rbfox3_j9        | 21.1172   | 19.5884    | 0             | 1         | 1         |
| Eif4a3           | 1.09116   | 0.813948   | -0.422854     | 0.266077  | 0.615214  |
| Aatk_j5          | 0.215103  | 0          | 0             | 1         | 1         |
| Aatk_j2          | 1.81088   | 1.63742    | 0             | 1         | 1         |
| 2410002I01Rik_j1 | 0.745779  | 1.70403    | 0             | 1         | 1         |
| Slc38a10         | 7.57389   | 7.61487    | 0             | 1         | 1         |
| P4hb_j2          | 36.9175   | 45.6984    | 0             | 1         | 1         |
| Arhgdia          | 54.821    | 61.3653    | 0             | 1         | 1         |
| Thoc4_j1         | 0.475767  | 0.29989    | -0.665823     | 0.008583  | 0.0764909 |
| Pcyt2_j6         | 1.26825   | 1.01536    | 0             | 1         | 1         |
| Pcyt2_j5         | 1.50664   | 2.42604    | 0             | 1         | 1         |
| Pcyt2_j7         | 3.34944   | 4.03793    | 0             | 1         | 1         |
| Sirt7_j13        | 12.4785   | 11.0011    | 0             | 1         | 1         |
| Ccdc57_j7        | 0.176165  | 0          | -1.79769e+308 | 0.0130433 | 0.1044    |
| Ccdc57_j9        | 0.188136  | 0.0759527  | -1.3086       | 0.0875236 | 0.362018  |
| Ccdc57_j10       | 0.0897627 | 0.14356    | 0.677462      | 0.36529   | 1         |
| Cd7_j2           | 0.0910989 | 0          | -1.79769e+308 | 0.0540224 | 1         |
| Cd7_j1           | 0.168134  | 0.100984   | -0.73549      | 0.511926  | 0.791849  |
| Pisd-ps1_j8      | 1.10524   | 2.42465    | 0             | 1         | 1         |
| Pisd-ps1_j9      | 1.71216   | 7.75255    | 0             | 1         | 1         |
| Pisd-ps1_j10     | 3.88584   | 8.20401    | 0             | 1         | 1         |
| AK050795_j1      | 12.7396   | 23.3665    | 0             | 1         | 1         |
| Pik3ip1          | 8.8098    | 7.75508    | 0             | 1         | 1         |

|                  |            |           |              |           |           |
|------------------|------------|-----------|--------------|-----------|-----------|
| Pes1_j7          | 1.89955    | 2.85427   | 0.587462     | 0.0004366 | 0.0072586 |
| Pes1_j8          | 1.39603    | 1.53251   | 0.134574     | 0.535185  | 0.806052  |
| Tbc1d10a_j1      | 1.97392    | 2.09046   | 0.0827536    | 0.791736  | 0.930476  |
| Thoc5_j3         | 0          | 0.895641  | 0            | 1         | 1         |
| Dbnl_j5          | 5.71448    | 6.30688   | 0            | 1         | 1         |
| Dbnl_j6          | 0.0394389  | 0.123719  | 0            | 1         | 1         |
| Ogdh             | 0.0738124  | 0.0208048 | 0            | 1         | 1         |
| Ogdh_j2          | 0.513114   | 0.423777  | 0            | 1         | 1         |
| Zmiz2_j4         | 0          | 0.154336  | 0            | 1         | 1         |
| Zmiz2_j7         | 0.717965   | 0.611069  | 0            | 1         | 1         |
| XLOC_003930      | 0.123028   | 0.19158   | 0.638969     | 0.441635  | 0.750302  |
| Vwc2_j4          | 2.86886    | 4.51031   | 0.652747     | 0.0280323 | 0.177633  |
| 4930415F15Rik_j1 | 0.0803422  | 0.0785086 | -0.0333064   | 0.981902  | 1         |
| Ikzf1            | 0.192732   | 0.267083  | 0.470691     | 0.251982  | 0.599992  |
| Egfr_j1          | 0.0384869  | 0.149431  | 1.95704      | 0.0077167 | 1         |
| Egfr_j5          | 4.96E-06   | 0.161648  | 14.9909      | 0.985738  | 0.995741  |
| Spred2_j3        | 1.5667     | 1.42424   | 0            | 1         | 1         |
| Gm12034          | 0.218051   | 0.28894   | 0.406104     | 0.705472  | 0.892269  |
| Peli1_j1         | 2.42432    | 2.42054   | 0            | 1         | 1         |
| Tmem17_j1        | 0.0376546  | 0.0713811 | 0.922715     | 0.598727  | 1         |
| Fam161a_j15      | 0          | 0.472493  | 1.79769e+308 | 4.79E-05  | 0.0011524 |
| Fam161a          | 0.218122   | 0.597473  | 1.45374      | 0.0066622 | 0.0633947 |
| Xpo1_j5          | 0          | 0.0859365 | 0            | 1         | 1         |
| Usp34_j9         | 0.243362   | 0.183317  | -0.408764    | 0.35518   | 0.691124  |
| Pus10_j1         | 0.14281    | 0.320953  | 0            | 1         | 1         |
| Pus10_j3         | 0          | 0.283058  | 0            | 1         | 1         |
| Pnpt1_j1         | 0.190316   | 0.478052  | 0            | 1         | 1         |
| Pnpt1_j4         | 0.324121   | 0.199647  | 0            | 1         | 1         |
| Ccdc88a_j1       | 0.850346   | 0.793146  | -0.100464    | 0.653472  | 0.867469  |
| Mtif2_j3         | 0.0368833  | 0.237127  | 0            | 1         | 1         |
| Rtn4             | 31.6866    | 39.008    | 0.299897     | 0.0009207 | 0.0133726 |
| Psme4_j1         | 0.414968   | 0.936633  | 0            | 1         | 1         |
| Ubtd2_j2         | 3.18781    | 2.5145    | -0.342292    | 0.143779  | 0.470722  |
| Fbxw11_j2        | 0          | 0.0692084 | 0            | 1         | 1         |
| XLOC_003992      | 0.0665873  | 0.132339  | 0.990915     | 0.110945  | 1         |
| Lcp2_j1          | 0.191752   | 0.401712  | 1.06692      | 0.0178046 | 0.129939  |
| Fam196b_j1       | 1.24174    | 0.941647  | -0.399103    | 0.140403  | 0.466056  |
| Pwwp2a_j1        | 0.0606215  | 0.0507599 | -0.256138    | 0.822255  | 1         |
| Rnf145_j2        | 1.35447    | 1.4846    | 0            | 1         | 1         |
| Ebf4_j2          | 1.41263    | 1.61792   | 0            | 1         | 1         |
| Adam19_j2        | 0.283489   | 0.955471  | 1.75292      | 1.24E-09  | 1.03E-07  |
| Adam19_j6        | 11.1565    | 17.3399   | 0.636209     | 5.18E-10  | 4.56E-08  |
| Zfp62_j4         | 4.55949    | 3.7132    | 0            | 1         | 1         |
| Gfpt2_j2         | 0.0872505  | 0.190663  | 1.12779      | 0.182689  | 0.523127  |
| Adamts2_j1       | 0.00101851 | 0.0823471 | 6.33719      | 0.250874  | 1         |
| Zfp354a_j2       | 0.212248   | 0.549614  | 1.37267      | 0.0002222 | 0.0041836 |
| Clk4_j6          | 0.0685486  | 0.0535567 | 0            | 1         | 1         |

|                  |            |                        |           |           |           |
|------------------|------------|------------------------|-----------|-----------|-----------|
| Col23a1_j4       | 2.33997    | 2.43886                | 0.0597218 | 0.730061  | 0.904677  |
| Nhp2_j1          | 0.9602     | 1.07902                | 0.168319  | 0.415133  | 0.733098  |
| D930048N14Rik    | 0          | 0.0977414 1.79769e+308 |           | 0.0119615 | 1         |
| XLOC_004045      | 0.119407   | 0.255774               | 1.09898   | 0.267875  | 0.616532  |
| Cdkl3_j1         | 0          | 0.0526954 1.79769e+308 |           | 0.105919  | 1         |
| Cdkl3_j5         | 0.229708   | 0.205083               | -0.163598 | 0.807086  | 0.93637   |
| Cdkl3_j10        | 0.114086   | 0.255033               | 1.16056   | 0.136405  | 0.459374  |
| Vdac1_j5         | 0          | 3.35033                | 0         | 1         | 1         |
| Zcchc10_j1       | 0          | 0.534509 1.79769e+308  |           | 0.0044769 | 0.046737  |
| Shroom1_j4       | 0          | 0.0890882 1.79769e+308 |           | 0.0523238 | 1         |
| Sept8_j3         | 0.906492   | 2.20289                | 1.28103   | 0.0002339 | 0.0043617 |
| Sept8            | 13.6545    | 16.6389                | 0.285189  | 0.0034743 | 0.0387061 |
| XLOC_004063      | 0.086847   | 0.125916               | 0.535911  | 0.609598  | 1         |
| Acs16            | 5.42737    | 5.95422                | 0         | 1         | 1         |
| Fnip1_j2         | 0.0143472  | 0.138227               | 3.26821   | 0.0034037 | 1         |
| Fnip1_j5         | 1.11325    | 0.930314               | -0.258994 | 0.253766  | 0.601916  |
| Rapgef6_j4       | 0.0492421  | 0.200079               | 0         | 1         | 1         |
| Rapgef6_j7       | 0.666634   | 0.653511               | 0         | 1         | 1         |
| Slc36a1_j2       | 0          | 0.734289               | 0         | 1         | 1         |
| G3bp1_j2         | 0.3574     | 0.571327               | 0         | 1         | 1         |
| Igtp_j5          | 0.744715   | 0.788744               | 0         | 1         | 1         |
| 4930438A08Rik_j1 | 0.126724   | 0.321176               | 1.34168   | 0.0022081 | 0.0269802 |
| Mprip_j4         | 6.29296    | 5.91735                | 0         | 1         | 1         |
| Mprip            | 4.54349    | 3.51877                | 0         | 1         | 1         |
| Rai1_j1          | 2.17697    | 1.70514                | -0.352434 | 0.0211618 | 0.146435  |
| XLOC_004111      | 0.0164176  | 0.0605756              | 0         | 1         | 1         |
| Llg1_j5          | 1.60533    | 1.78268                | 0.151178  | 0.59433   | 0.838473  |
| Tnfrsf13b_j2     | 0.283014   | 0.43261                | 0.612196  | 0.185856  | 0.526194  |
| Grap_j3          | 0.0382893  | 0.11562                | 1.59438   | 0.26814   | 1         |
| Grap_j2          | 0.286691   | 0.604614               | 1.07652   | 0.0483032 | 0.252794  |
| Specc1_j2        | 0.681106   | 0.747117               | 0         | 1         | 1         |
| Specc1_j7        | 0.555808   | 0.288528               | 0         | 1         | 1         |
| Trpv2_j2         | 4.90912    | 2.01898                | 0         | 1         | 1         |
| Cdrt4_j1         | 0.0537959  | 0.0477253              | -0.172742 | 0.902125  | 1         |
| Zkscan6_j5       | 0.859923   | 1.449                  | 0         | 1         | 1         |
| 9130409J20Rik_j4 | 0.845967   | 0.743829               | -0.185631 | 0.620018  | 0.850928  |
| Gas7_j5          | 1.05959    | 0.825801               | 0         | 1         | 1         |
| Myh10_j4         | 1.37128    | 0.992955               | 0         | 1         | 1         |
| Myh10_j8         | 5.0424     | 3.57628                | 0         | 1         | 1         |
| 1500010J02Rik_j8 | 0          | 0.131196               | 0         | 1         | 1         |
| Tmem107_j1       | 1.41795    | 1.87092                | 0.399943  | 0.407171  | 0.727764  |
| Per1_j1          | 1.04253    | 1.54283                | 0.565485  | 0.0038413 | 0.0416791 |
| Aloxe3_j1        | 0.00114561 | 0.151372               | 7.04584   | 0.549612  | 1         |
| Kcnab3_j2        | 0.0207508  | 0.143757               | 2.79239   | 0.039378  | 1         |
| Sat2             | 0.0634456  | 0 -1.79769e+308        |           | 0.0605885 | 1         |
| Sat2_j4          | 0          | 0.248751 1.79769e+308  |           | 0.0033376 | 0.0374822 |
| Neurl4_j6        | 5.34842    | 5.79605                | 0.115957  | 0.617498  | 0.84948   |

|                  |           |            |              |           |           |
|------------------|-----------|------------|--------------|-----------|-----------|
| Gps2_j5          | 0.93824   | 0.945272   | 0            | 1         | 1         |
| Ybx2_j8          | 0.0610215 | 0.118927   | 0.962685     | 0.321615  | 1         |
| Ybx2_j9          | 0.081528  | 0.133775   | 0.714446     | 0.555921  | 1         |
| Phf23            | 2.84919   | 3.03858    | 0.0928501    | 0.690926  | 0.885572  |
| Dlg4_j3          | 0         | 1.87118    | 0            | 1         | 1         |
| Dlg4_j6          | 0         | 0.1568     | 0            | 1         | 1         |
| Clec10a          | 0.0451648 | 0.808042   | 4.16116      | 0.0002147 | 0.0040654 |
| Kif1c_j2         | 0.494408  | 0.0417241  | 0            | 1         | 1         |
| Camkk1_j2        | 0.265493  | 0.176993   | 0            | 1         | 1         |
| P2rx5_j2         | 1.00985   | 0.805746   | 0            | 1         | 1         |
| Tax1bp3_j2       | 6.28593   | 7.69707    | 0            | 1         | 1         |
| Shpk_j1          | 1.14496   | 1.60829    | 0            | 1         | 1         |
| XLOC_004224      | 0         | 0.0880332  | 1.79769e+308 | 0.0460326 | 1         |
| E130309D14Rik_j1 | 0.689778  | 0.727722   | 0            | 1         | 1         |
| Mett10d_j1       | 0.414513  | 0.482935   | 0.220412     | 0.364463  | 0.698412  |
| Tsr1             | 4.38841   | 4.61554    | 0            | 1         | 1         |
| Smg6_j2          | 0.101725  | 0.0482836  | 0            | 1         | 1         |
| Smyd4_j1         | 0.308705  | 0.734473   | 0            | 1         | 1         |
| Prpf8_j1         | 6.82132   | 7.72118    | 0            | 1         | 1         |
| Prpf8_j3         | 22.9064   | 25.4103    | 0            | 1         | 1         |
| XLOC_004240      | 0.206613  | 0.19407    | -0.0903531   | 0.853031  | 0.953424  |
| Pitpna_j4        | 32.207    | 31.0831    | 0            | 1         | 1         |
| Pitpna_j3        | 1.82817   | 2.89311    | 0            | 1         | 1         |
| Myo1c            | 3.07615   | 3.50407    | 0            | 1         | 1         |
| Ywhae_j5         | 11.008    | 10.0181    | -0.135936    | 0.49834   | 0.783925  |
| Myo18a_j5        | 0.280703  | 1.00412    | 0            | 1         | 1         |
| XLOC_004263      | 0.25858   | 0.282563   | 0.127962     | 0.764511  | 0.919273  |
| Phf12_j1         | 2.06842   | 2.56052    | 0            | 1         | 1         |
| Flot2_j2         | 0.355753  | 0.00495576 | 0            | 1         | 1         |
| Flot2_j1         | 1.13182   | 0.79696    | 0            | 1         | 1         |
| Proca1_j6        | 0         | 0.153675   | 1.79769e+308 | 0.0451953 | 1         |
| 2610507B11Rik_j3 | 7.4226    | 10.3111    | 0            | 1         | 1         |
| Vtn_j2           | 0         | 0.116708   | 1.79769e+308 | 0.0419121 | 1         |
| Rab11fip4_j2     | 1.19986   | 1.66347    | 0            | 1         | 1         |
| Rab11fip4_j1     | 1.18436   | 1.58344    | 0            | 1         | 1         |
| Rab11fip4_j4     | 8.664     | 7.03047    | 0            | 1         | 1         |
| Atad5_j1         | 0         | 0.0938618  | 1.79769e+308 | 0.013538  | 1         |
| Rhot1_j1         | 0.0312763 | 0.17905    | 2.51722      | 0.0364666 | 0.211122  |
| Zfp207_j1        | 17.5084   | 15.0487    | 0            | 1         | 1         |
| Psm11_j1         | 3.58137   | 3.82574    | 0.0952282    | 0.597843  | 0.840519  |
| Cdk5r1_j2        | 0.394868  | 0.761021   | 0            | 1         | 1         |
| Tmem98           | 3.25894   | 4.46965    | 0.455757     | 0.0088605 | 0.0782746 |
| XLOC_004309      | 0.0589912 | 0.125352   | 1.08741      | 0.389211  | 1         |
| XLOC_004309      | 0.0576046 | 0.055452   | -0.0549445   | 0.961781  | 1         |
| Unc45b_j4        | 0.0484961 | 0.0607541  | 0.325113     | 0.834574  | 1         |
| Slnf5_j1         | 0.206787  | 0.123175   | -0.747436    | 0.174713  | 0.512897  |
| Slnf1            | 0.113243  | 0.200621   | 0.82505      | 0.134935  | 0.457121  |



|             |            |           |               |           |           |
|-------------|------------|-----------|---------------|-----------|-----------|
| Ap2b1_j3    | 2.92766    | 2.04189   | -0.519844     | 0.0035261 | 0.0391716 |
| Rasl10b_j3  | 8.77547    | 8.36802   | 0             | 1         | 1         |
| Heatr6_j2   | 1.03954    | 1.05617   | 0             | 1         | 1         |
| Acaca_j1    | 0.403965   | 0.334423  | -0.272559     | 0.642654  | 0.862182  |
| Acaca_j9    | 0.520356   | 0.736374  | 0.500941      | 0.303101  | 0.648824  |
| Acaca_j8    | 0.662029   | 0.19208   | -1.78518      | 0.0235085 | 0.157319  |
| Acaca_j14   | 0.0221265  | 0.331986  | 3.90728       | 0.0610348 | 0.29147   |
| Acaca_j13   | 0.676362   | 0.474585  | -0.51113      | 0.383573  | 0.713102  |
| XLOC_004337 | 0.00826925 | 0.0679304 | 3.03823       | 0.281253  | 1         |
| Bcas3_j2    | 0.267657   | 0.19718   | 0             | 1         | 1         |
| Bcas3_j8    | 1.39034    | 2.1388    | 0             | 1         | 1         |
| Tubd1_j1    | 0.9285     | 0.811108  | -0.195008     | 0.625156  | 0.853774  |
| Tubd1_j4    | 0          | 0.0665628 | 1.79769e+308  | 0.0670861 | 1         |
| Mtmr4       | 11.3067    | 6.75818   | 0             | 1         | 1         |
| Supt4h1     | 1.67355    | 0.625713  | -1.41934      | 0.0006431 | 0.0100157 |
| Supt4h1_j1  | 0.153438   | 0.0914055 | -0.747304     | 0.494784  | 0.782608  |
| Supt4h1_j3  | 0.142509   | 0.270296  | 0.923487      | 0.0892526 | 0.366263  |
| Bzrap1_j3   | 0.0522034  | 0         | -1.79769e+308 | 0.0021116 | 1         |
| Mks1_j4     | 0.174916   | 0.269715  | 0.62477       | 0.429512  | 0.742785  |
| Mks1_j6     | 0.552077   | 0.932505  | 0.756241      | 0.065905  | 0.306293  |
| XLOC_004367 | 0.144014   | 0.111583  | -0.368082     | 0.664009  | 0.872726  |
| Cox11_j1    | 2.5468     | 2.60121   | 0.0304953     | 0.8777    | 0.96086   |
| Car10_j2    | 2.0433     | 1.60323   | 0             | 1         | 1         |
| Car10_j3    | 0.785531   | 0.730497  | 0             | 1         | 1         |
| Car10_j5    | 0.33224    | 0.417946  | 0             | 1         | 1         |
| Mbtd1_j5    | 0.110356   | 0.154173  | 0.482381      | 1         | 1         |
| Mbtd1_j4    | 0.266999   | 0.13504   | -0.983446     | 1         | 1         |
| Mbtd1_j6    | 0.0655729  | 0.151774  | 1.21075       | 0.358391  | 1         |
| Spag9       | 2.31034    | 1.36284   | -0.761483     | 1.92E-05  | 0.000537  |
| Spag9_j1    | 2.1823     | 3.20042   | 0.552412      | 0.0001461 | 0.0029484 |
| Ankrd40_j1  | 5.48513    | 4.05218   | -0.436827     | 0.0925769 | 0.374434  |
| Chad_j1     | 0.38841    | 0.215723  | -0.848399     | 0.275556  | 0.624571  |
| Mrpl27_j3   | 0.162456   | 0.182268  | 0.166018      | 0.799733  | 0.933125  |
| Ppp1r9b_j1  | 32.8313    | 33.4235   | 0.0257899     | 0.786668  | 0.928668  |
| XLOC_004391 | 0.0586508  | 0.0950577 | 0.696653      | 0.427552  | 1         |
| Slc35b1_j5  | 0.416785   | 1.19882   | 0             | 1         | 1         |
| Spop_j4     | 0.149159   | 0.086721  | -0.782398     | 0.276061  | 0.624922  |
| Phb_j1      | 1.25511    | 1.02748   | -0.2887       | 0.526449  | 0.801051  |
| Zfp652_j6   | 0          | 0.0692922 | 1.79769e+308  | 0.00216   | 1         |
| Snf8_j3     | 0.278575   | 0.316271  | 0.183092      | 0.615577  | 0.848435  |
| AK078566_j1 | 0.528773   | 0.536539  | 0.0210361     | 0.961237  | 0.988989  |
| Hoxb9_j2    | 1.7496     | 1.43717   | -0.283795     | 0.240403  | 0.587787  |
| Hoxb8       | 0.898401   | 0.592412  | -0.600759     | 0.131345  | 0.451204  |
| Hoxb7_j1    | 0.325189   | 0.260866  | -0.317972     | 0.576537  | 0.829049  |
| Hoxb5_j2    | 1.485      | 1.2525    | -0.245646     | 0.190475  | 0.532606  |
| Sp6_j1      | 6.93E-05   | 0.27016   | 11.928        | 0.885369  | 0.963679  |
| Osbpl7_j1   | 0.876082   | 0.967031  | 0             | 1         | 1         |

|             |           |           |              |           |           |
|-------------|-----------|-----------|--------------|-----------|-----------|
| Mllt6_j2    | 0         | 0.197904  | 0            | 1         | 1         |
| Mllt6_j5    | 0.37367   | 0.637414  | 0            | 1         | 1         |
| Psmb3_j8    | 0.729512  | 0.575724  | -0.341556    | 0.446898  | 0.753618  |
| Lasp1_j5    | 28.219    | 30.6717   | 0            | 1         | 1         |
| Cdk12       | 1.28334   | 1.04672   | 0            | 1         | 1         |
| Thra_j6     | 2.46394   | 0.952094  | -1.37179     | 0.000807  | 0.0120551 |
| XLOC_004437 | 0.177846  | 0.137551  | -0.370657    | 0.508014  | 0.789986  |
| Msl1        | 4.79576   | 5.41859   | 0            | 1         | 1         |
| Casc3_j2    | 0         | 0.249981  | 0            | 1         | 1         |
| Wipf2_j2    | 5.42715   | 4.62025   | 0            | 1         | 1         |
| Eif1_j1     | 0.0277419 | 0.0832381 | 0            | 1         | 1         |
| XLOC_004451 | 0.0864924 | 0.182409  | 0            | 1         | 1         |
| Ttc25_j1    | 0.337357  | 0.197355  | -0.773482    | 0.393218  | 0.719154  |
| Cnp_j2      | 35.8698   | 39.842    | 0.151519     | 0.105837  | 0.403926  |
| Stat5a_j1   | 0         | 0.14168   | 0            | 1         | 1         |
| Naglu_j1    | 0.0290508 | 0.181078  | 2.63996      | 0.0027739 | 0.0323677 |
| Coasy_j1    | 4.14914   | 5.29811   | 0            | 1         | 1         |
| Coasy_j3    | 5.94287   | 6.15902   | 0            | 1         | 1         |
| Cntnap1_j4  | 22.1019   | 16.4095   | 0            | 1         | 1         |
| Vps25_j3    | 17.8532   | 17.5549   | -0.0243048   | 0.883633  | 0.963053  |
| Wnk4_j1     | 0         | 0.368827  | 1.79769e+308 | 0.0004299 | 0.0071763 |
| Psme3_j3    | 2.08309   | 1.64365   | -0.341816    | 0.0955777 | 0.381629  |
| Psme3_j4    | 0.396473  | 0.927541  | 1.22619      | 8.47E-07  | 3.58E-05  |
| Rdm1_j1     | 0.769517  | 1.43446   | 0.898485     | 0.0321635 | 0.194502  |
| Tmub2       | 18.7191   | 19.3002   | 0            | 1         | 1         |
| XLOC_004487 | 0         | 0.17925   | 1.79769e+308 | 0.0741755 | 0.328352  |
| Adam11_j10  | 0.477648  | 0.119235  | 0            | 1         | 1         |
| Adam11_j13  | 6.81316   | 6.81243   | -0.00015411  | 1         | 1         |
| Ccdc103     | 0         | 0.149415  | 0            | 1         | 1         |
| Nmt1        | 3.74079   | 6.50328   | 0            | 1         | 1         |
| Nmt1_j4     | 11.4485   | 9.32371   | 0            | 1         | 1         |
| Acbd4_j1    | 0.831828  | 0.974294  | 0            | 1         | 1         |
| Acbd4_j3    | 1.13841   | 1.22938   | 0            | 1         | 1         |
| Acbd4_j7    | 1.44197   | 1.40159   | 0            | 1         | 1         |
| Hexim2_j3   | 0.636628  | 0.439805  | -0.533586    | 0.151655  | 0.482947  |
| Hexim2      | 0         | 0.145641  | 1.79769e+308 | 0.0211363 | 1         |
| Fmnl1_j1    | 0.98198   | 0.117095  | -3.06801     | 2.78E-07  | 1.33E-05  |
| Fmnl1       | 0.636032  | 0.556837  | -0.191845    | 0.585464  | 0.833935  |
| Fmnl1_j7    | 1.04796   | 0.683808  | -0.615913    | 0.0687521 | 0.31425   |
| Mettl2_j4   | 1.05691   | 1.06432   | 0.0100829    | 0.97757   | 0.993541  |
| Mrc2        | 0.0867863 | 0.0139591 | -2.63626     | 0.0454105 | 1         |
| Mrc2_j1     | 0         | 0.235618  | 1.79769e+308 | 1.09E-06  | 4.42E-05  |
| Tanc2_j2    | 0.505156  | 0.629271  | 0.316953     | 0.14249   | 0.469152  |
| Gm11652     | 12.2663   | 12.7433   | 0.0550403    | 0.659016  | 0.870425  |
| Ace_j2      | 0.166291  | 0.0253387 | -2.7143      | 0.0213918 | 0.147482  |
| Psmc5_j3    | 16.2317   | 14.8214   | 0            | 1         | 1         |
| Gm885       | 0.0845384 | 0.265176  | 1.64927      | 0.0663513 | 0.307722  |

|                  |            |           |              |            |           |           |
|------------------|------------|-----------|--------------|------------|-----------|-----------|
| 1810010H24Rik_j2 | 0          | 0.275415  | 1.79769e+308 | 0.0189658  | 0.13595   |           |
| 1810010H24Rik_j3 | 0.622355   | 0.287925  |              | -1.11204   | 0.130202  | 0.44924   |
| Psm12_j1         | 0          | 0.370202  | 1.79769e+308 | 0.0051512  | 0.0518515 |           |
| Psm12_j3         | 14.7169    | 17.9929   |              | 0.289954   | 0.0443205 | 0.24008   |
| Helz_j1          | 0          | 0.457984  |              | 0          | 1         | 1         |
| Helz_j3          | 0.0490012  | 0.0929024 |              | 0          | 1         | 1         |
| Helz_j2          | 0          | 0.0820369 |              | 0          | 1         | 1         |
| Ccdc46_j1        | 0.267088   | 0.488448  |              | 0.870889   | 0.0160103 | 0.120452  |
| Axin2_j2         | 0.41884    | 0.840251  |              | 0          | 1         | 1         |
| Gna13_j1         | 0.0973429  | 0.0462953 |              | 0          | 1         | 1         |
| Sstr2            | 1.25749    | 1.10394   |              | -0.187888  | 0.552181  | 0.816261  |
| XLOC_004541      | 0          | 0.0689821 | 1.79769e+308 | 0.145009   | 1         |           |
| Rpl38_j3         | 0.272619   | 0.217752  |              | -0.324203  | 0.467569  | 0.766717  |
| Dnaic2           | 0.00162228 | 0.306339  |              | 0          | 1         | 1         |
| Dnaic2_j7        | 0          | 0.11951   |              | 0          | 1         | 1         |
| Dnaic2_j8        | 0.244288   | 0.367078  |              | 0          | 1         | 1         |
| Kif19a_j4        | 0.168445   | 0.220733  |              | 0          | 1         | 1         |
| Gprc5c_j1        | 0.496218   | 0.188833  |              | 0          | 1         | 1         |
| XLOC_004546      | 0.139847   | 0.23032   |              | 0.719789   | 0.190879  | 0.533094  |
| XLOC_004550      | 0.222046   | 0.187737  |              | -0.242145  | 0.478052  | 0.77269   |
| Kctd2_j2         | 46.2664    | 48.2163   |              | 0.0595571  | 0.554763  | 0.817746  |
| Mrps7_j1         | 26.3354    | 29.1161   |              | 0          | 1         | 1         |
| Cdk3_j5          | 0.0238286  | 0.0834884 |              | 0          | 1         | 1         |
| 1810032O08Rik_j1 | 0          | 0.200171  | 1.79769e+308 | 0.0689097  | 0.314705  |           |
| 1810032O08Rik_j4 | 0.21908    | 0.221663  |              | 0.0169128  | 0.987598  | 0.996374  |
| Mfsd11_j3        | 4.63162    | 5.34665   |              | 0.207116   | 0.166462  | 0.502925  |
| Mgat5b_j3        | 0.766108   | 0.869006  |              | 0.181819   | 0.617503  | 0.84948   |
| Mgat5b_j4        | 6.74E-05   | 0.461073  |              | 12.7399    | 0.916493  | 0.973935  |
| Sec14l1          | 4.78076    | 3.59939   |              | -0.409487  | 0.021032  | 0.14591   |
| Sept9_j1         | 7.05013    | 9.60728   |              | 0          | 1         | 1         |
| Sept9            | 4.92363    | 4.08287   |              | 0          | 1         | 1         |
| Gm11734_j5       | 0.0681045  | 0.0689521 |              | 0.0178448  | 0.989882  | 1         |
| Tnrc6c_j1        | 1.17024    | 1.4757    |              | 0.334598   | 0.044331  | 0.24008   |
| XLOC_004584      | 0.0971304  | 0.128424  |              | 0.402917   | 0.642891  | 1         |
| Tmc8_j11         | 0.0584083  | 0.0574412 |              | -0.0240881 | 0.985145  | 1         |
| Afmid_j4         | 0.149422   | 0.273151  |              | 0.870302   | 0.121152  | 0.433418  |
| Pgs1_j4          | 3.48019    | 5.44844   |              | 0          | 1         | 1         |
| Pgs1_j7          | 3.22691    | 1.27789   |              | 0          | 1         | 1         |
| Engase_j5        | 0.417776   | 0.73804   |              | 0.820968   | 0.226596  | 0.573689  |
| Ccdc40_j1        | 0.117105   | 0.216429  |              | 0.886089   | 0.165894  | 0.502504  |
| Card14_j1        | 0.25236    | 0.237746  |              | -0.0860628 | 0.825879  | 0.94384   |
| Card14_j8        | 0.465842   | 0.932104  |              | 1.00065    | 0.0034658 | 0.0386371 |
| Rnf213_j1        | 0.228564   | 0.22664   |              | 0          | 1         | 1         |
| Rnf213_j9        | 2.07149    | 3.2201    |              | 0          | 1         | 1         |
| Bahcc1_j4        | 0          | 0.065649  | 1.79769e+308 | 0.000887   | 1         |           |
| Bahcc1_j3        | 1.42E-05   | 0.205314  |              | 13.8232    | 0.915311  | 0.973525  |
| Hgs_j1           | 0.418815   | 0.309439  |              | -0.436662  | 0.117477  | 0.426441  |

|                  |           |           |              |           |           |
|------------------|-----------|-----------|--------------|-----------|-----------|
| Anapc11_j2       | 0         | 0.0594174 | 1.79769e+308 | 0.036501  | 1         |
| Lrrc45_j1        | 0.116039  | 0.208254  |              | 0 1       | 1         |
| Aspscr1_j4       | 7.5969    | 7.30528   |              | 0 1       | 1         |
| Lrrc45_j7        | 0.439553  | 2.68014   |              | 0 1       | 1         |
| Hexdc_j4         | 0.607381  | 0.903205  |              | 0 1       | 1         |
| Foxk2_j3         | 0.643296  | 0.63978   |              | 0 1       | 1         |
| Tbcd             | 11.8251   | 9.57451   |              | 0 1       | 1         |
| Tbcd_j5          | 18.8236   | 23.8207   |              | 0 1       | 1         |
| Metrn1           | 4.29244   | 9.05907   | 1.07757      | 4.13E-08  | 2.48E-06  |
| XLOC_004630      | 2.97925   | 9.50333   | 0            | 1         | 1         |
| Drg1_j2          | 27.6914   | 33.792    | 0            | 1         | 1         |
| Limk2_j5         | 12.0805   | 13.1931   | 0            | 1         | 1         |
| Ccdc157_j5       | 0         | 0.0596031 | 1.79769e+308 | 0.001766  | 1         |
| Mtmr3_j9         | 0.248779  | 0.197083  | 0            | 1         | 1         |
| Mtmr3_j10        | 2.12359   | 3.06035   | 0            | 1         | 1         |
| Nf2_j4           | 0.322552  | 0.181089  | 0            | 1         | 1         |
| Nefh_j8          | 0.335339  | 0.445378  | 0            | 1         | 1         |
| Gas2l1_j2        | 17.1703   | 17.2501   | 0            | 1         | 1         |
| Emid1_j2         | 0.174446  | 0.237287  | 0.443848     | 0.528405  | 0.801996  |
| Polm_j7          | 0.101642  | 0.182048  | 0.84082      | 0.178332  | 0.517853  |
| Camk2b_j11       | 0         | 0.183719  | 0            | 1         | 1         |
| H2afv_j1         | 4.18589   | 5.16527   | 0.30331      | 0.301105  | 0.64749   |
| Tbrg4_j1         | 0.970118  | 3.88524   | 0            | 1         | 1         |
| Tns3_j1          | 0.184295  | 0.190405  | 0            | 1         | 1         |
| Tns3_j2          | 0.253999  | 0.259297  | 0            | 1         | 1         |
| Tns3_j3          | 0.620181  | 0.400513  | 0            | 1         | 1         |
| Hus1_j1          | 0.514672  | 0.522403  | 0            | 1         | 1         |
| Zpbp_j3          | 0.0272112 | 0.0916569 | 1.75204      | 0.131394  | 1         |
| Ddc_j1           | 0         | 0.0687764 | 1.79769e+308 | 0.0408694 | 1         |
| Ddc_j2           | 0.25055   | 0.382748  | 0.611298     | 0.610352  | 0.846502  |
| Grb10_j9         | 0.101586  | 0.173879  | 0            | 1         | 1         |
| Cobl_j9          | 0         | 0.187133  | 0            | 1         | 1         |
| Cobl_j11         | 1.14018   | 0.778874  | 0            | 1         | 1         |
| XLOC_004704      | 0.0512832 | 0.120542  | 1.23298      | 0.564112  | 1         |
| Actr2_j4         | 0.647817  | 3.54836   | 0            | 1         | 1         |
| Cep68_j1         | 0.495016  | 0.675187  | 0.447814     | 0.0453519 | 0.243816  |
| Aftph            | 1.82192   | 1.90322   | 0.0629757    | 0.756981  | 0.916197  |
| Ehbp1_j5         | 9.69421   | 10.6047   | 0            | 1         | 1         |
| Ehbp1_j8         | 2.32689   | 3.73376   | 0            | 1         | 1         |
| Ehbp1_j7         | 0         | 0.346423  | 0            | 1         | 1         |
| XLOC_004719      | 0.126033  | 0.168181  | 0.416219     | 0.559496  | 0.820676  |
| Commd1_j1        | 12.6849   | 12.6597   | 0            | 1         | 1         |
| mKIAA1841_j1     | 0.852871  | 1.08379   | 0            | 1         | 1         |
| Papolg_j1        | 0.0547289 | 0.253329  | 2.21064      | 0.0034738 | 0.0387061 |
| Eml6_j5          | 0.0312376 | 0.382453  | 0            | 1         | 1         |
| Spnb2_j4         | 0         | 0.0732068 | 1.79769e+308 | 0.0017604 | 1         |
| 4930505A04Rik_j1 | 3.34E-06  | 0.0882933 | 14.6918      | 0.99599   | 1         |

|             |             |             |              |           |           |
|-------------|-------------|-------------|--------------|-----------|-----------|
| Npm1_j4     | 0.661914    | 0.796856    | 0.267675     | 0.323563  | 0.666592  |
| Tlx3_j3     | 28.7536     | 31.4485     | 0.12925      | 0.440374  | 0.749633  |
| Tlx3_j4     | 0.485967    | 0.520655    | 0.09947      | 0.716662  | 0.897711  |
| Kcnip1_j5   | 10.0693     | 7.81511     | -0.365627    | 0.0346088 | 0.204274  |
| Kcnip1_j2   | 0.120022    | 2.30855     | 4.26562      | 4.50E-07  | 2.04E-05  |
| Dock2_j7    | 0           | 0.100493    | 1.79769e+308 | 0.0477721 | 1         |
| Dock2_j13   | 0.014507    | 0.123618    | 3.09107      | 0.09859   | 1         |
| Wwc1_j4     | 0           | 0.19697     | 1.79769e+308 | 0.0149831 | 0.114888  |
| Wwc1_j6     | 0           | 0.0770921   | 1.79769e+308 | 0.0537461 | 1         |
| Odz2_j7     | 0.129288    | 0.114634    | -0.17355     | 0.716167  | 1         |
| Odz2_j9     | 0.101434    | 0.185117    | 0.867894     | 0.0412624 | 0.228493  |
| Odz2_j10    | 0.0247089   | 0.0737774   | 1.57815      | 0.0401097 | 1         |
| Mat2b       | 5.53882     | 5.38918     | 0            | 1         | 1         |
| Gabrg2_j1   | 2.97251     | 2.07441     | 0            | 1         | 1         |
| Ublcp1_j9   | 0.203381    | 0.206215    | 0            | 1         | 1         |
| Lsm11_j3    | 0.0461595   | 0.567755    | 0            | 1         | 1         |
| Sgcd_j1     | 1.23361     | 1.13701     | 0            | 1         | 1         |
| Sgcd_j4     | 5.36E-05    | 0.362711    | 0            | 1         | 1         |
| Trim41_j1   | 1.25421     | 1.16754     | -0.103307    | 0.748891  | 0.912691  |
| Sqstm1_j5   | 145.437     | 185.243     | 0            | 1         | 1         |
| Maml1_j2    | 0           | 0.169354    | 1.79769e+308 | 0.0107239 | 0.0901284 |
| Zfp879_j2   | 0.0283086   | 0.0748779   | 0            | 1         | 1         |
| Zfp879      | 0.0873115   | 0.0976066   | 0            | 1         | 1         |
| Zfp354b_j1  | 0.0807059   | 0.117472    | 0.541565     | 0.548275  | 1         |
| Phf15       | 0.350454    | 0.310989    | -0.172362    | 0.634049  | 0.858073  |
| Ube2b_j3    | 0.276532    | 0.264557    | 0            | 1         | 1         |
| Ube2b_j6    | 1.3759      | 2.38203     | 0            | 1         | 1         |
| Ube2b_j5    | 2.26195     | 3.04312     | 0            | 1         | 1         |
| Tcf7_j2     | 0           | 0.0559248   | 1.79769e+308 | 0.0926831 | 1         |
| Slc22a5_j3  | 0.000336652 | 0.761738    | 0            | 1         | 1         |
| Cdc42se2_j5 | 6.56984     | 9.29012     | 0            | 1         | 1         |
| Tnip1_j1    | 0           | 0.107856    | 1.79769e+308 | 0.0008323 | 1         |
| Tnip1_j2    | 0.0552208   | 0.000300987 | -7.51937     | 0.579024  | 1         |
| Anxa6       | 53.5021     | 54.187      | 0            | 1         | 1         |
| Sparc_j2    | 112.29      | 116.426     | 0            | 1         | 1         |
| Atox1_j1    | 17.6997     | 29.2808     | 0            | 1         | 1         |
| Gemin5_j6   | 0.936124    | 1.36253     | 0            | 1         | 1         |
| Gemin5_j7   | 0           | 0.125694    | 0            | 1         | 1         |
| Rnf187_j2   | 0.530899    | 0.392181    | -0.436919    | 0.487906  | 0.778493  |
| Obscn_j1    | 0.0789816   | 0.241051    | 1.60975      | 0.0827967 | 0.350783  |
| Tom1l2_j3   | 26.9243     | 23.1822     | 0            | 1         | 1         |
| Flii_j4     | 0           | 0.697685    | 1.79769e+308 | 9.35E-05  | 0.0020292 |
| Usp22_j4    | 7.61227     | 9.73304     | 0            | 1         | 1         |
| Slc47a1_j8  | 0           | 0.086605    | 1.79769e+308 | 0.0934259 | 1         |
| Slc47a1_j6  | 0.0389305   | 0.383608    | 3.30066      | 0.0100448 | 0.085812  |
| Rnf112_j1   | 0.291193    | 0.622511    | 0            | 1         | 1         |
| Epn2_j4     | 0           | 0.118936    | 0            | 1         | 1         |

|                  |            |           |              |           |           |
|------------------|------------|-----------|--------------|-----------|-----------|
| Prpsap2_j3       | 0.182722   | 0.179655  | -0.0244173   | 0.94611   | 0.983919  |
| Prpsap2_j11      | 0.134113   | 0.125176  | -0.0994934   | 0.963349  | 1         |
| Prpsap2_j14      | 0.119136   | 0.247277  | 1.05352      | 0.548271  | 0.814119  |
| Ulk2_j1          | 8.96166    | 11.1789   | 0            | 1         | 1         |
| Ncor1_j5         | 4.68865    | 5.38868   | 0            | 1         | 1         |
| Ncor1_j7         | 0.596794   | 0.632761  | 0            | 1         | 1         |
| Cenpv_j1         | 3.15588    | 3.18288   | 0.0122872    | 0.972274  | 0.991962  |
| Cenpv_j2         | 0.586595   | 0.727233  | 0.310054     | 0.550454  | 0.815351  |
| Gm12279_j2       | 25.9854    | 45.0237   | 0.792985     | 0         | 0         |
| Zfp287_j3        | 0.250706   | 0.451985  | 0.850276     | 0.0200774 | 0.141217  |
| Zfp286_j2        | 0          | 0.0783989 | 1.79769e+308 | 0.0329156 | 1         |
| Cox10_j1         | 0.896395   | 2.09693   | 1.22607      | 6.95E-05  | 0.0015758 |
| Arhgap44_j8      | 20.8528    | 20.2032   | 0            | 1         | 1         |
| Map2k4_j4        | 15.2952    | 10.5795   | 0            | 1         | 1         |
| Dnahc9_j11       | 0.00714591 | 0.144606  | 4.33886      | 0.158193  | 1         |
| Shisa6_j2        | 0.109103   | 0.071446  | -0.610764    | 0.58659   | 1         |
| 2310004I24Rik_j1 | 4.82104    | 5.88919   | 0            | 1         | 1         |
| Wdr16_j2         | 0.0975431  | 0.118414  | 0.279729     | 0.797706  | 1         |
| Wdr16_j4         | 0.0858891  | 0.067366  | -0.350455    | 0.799995  | 1         |
| Ntn1             | 0.209849   | 0.29766   | 0.504318     | 0.1715    | 0.50855   |
| Pfas_j1          | 0.463836   | 0.783398  | 0            | 1         | 1         |
| Chd3_j4          | 10.7885    | 14.4415   | 0            | 1         | 1         |
| Chd3_j5          | 6.19627    | 6.50138   | 0            | 1         | 1         |
| Chd3_j6          | 1.17869    | 1.60848   | 0            | 1         | 1         |
| Chd3_j7          | 8.50276    | 9.67976   | 0            | 1         | 1         |
| Cyb5d1_j3        | 17.1798    | 17.895    | 0            | 1         | 1         |
| Dnahc2_j7        | 0.0194308  | 0.0683703 | 1.81503      | 0.298042  | 1         |
| Dnahc2_j10       | 0.113309   | 0.0519058 | -1.1263      | 0.459982  | 1         |
| Dnahc2_j12       | 0.0755407  | 0.159075  | 1.07438      | 0.226597  | 0.573689  |
| Dnahc2_j14       | 0.0509998  | 0.0911668 | 0.838017     | 0.417109  | 1         |
| Wrap53           | 0.47335    | 0.371682  | -0.34884     | 0.152437  | 0.484103  |
| Polr2a_j2        | 3.1618     | 6.15094   | 0            | 1         | 1         |
| Nlgn2_j5         | 25.7061    | 33.9676   | 0.402051     | 8.13E-06  | 0.000258  |
| Tnk1_j1          | 0.408346   | 0.634592  | 0            | 1         | 1         |
| Acap1_j1         | 0.0589246  | 0.0703519 | 0.255719     | 0.868854  | 1         |
| Acap1_j6         | 0.0751164  | 0.140446  | 0.902812     | 0.321315  | 1         |
| 2810408A11Rik_j4 | 0.0821512  | 0.178197  | 1.11712      | 0.290129  | 0.637464  |
| Eif5a_j2         | 71.5988    | 82.0009   | 0            | 1         | 1         |
| Slc16a13_j3      | 0.214823   | 0.358099  | 0.737209     | 0.163038  | 0.498224  |
| 0610010K14Rik_j4 | 1.07855    | 0.457019  | -1.23877     | 0.0118707 | 0.0974142 |
| 0610010K14Rik_j2 | 1.92414    | 2.7021    | 0.489867     | 0.036235  | 0.210202  |
| 0610010K14Rik_j3 | 0          | 0.627449  | 1.79769e+308 | 7.69E-05  | 0.0017143 |
| Alox12_j3        | 0.107945   | 0.384534  | 1.83281      | 0.0057644 | 0.0567232 |
| Cxcl16_j6        | 0          | 0.0893893 | 1.79769e+308 | 0.0045912 | 1         |
| Cxcl16_j5        | 0          | 0.106972  | 1.79769e+308 | 0.0019455 | 1         |
| Slc25a11_j1      | 16.0227    | 15.9143   | -0.00979516  | 0.944819  | 0.983636  |
| Slc25a11_j3      | 7.31576    | 8.96146   | 0.292727     | 0.0051461 | 0.0518211 |

|              |             |           |              |           |           |
|--------------|-------------|-----------|--------------|-----------|-----------|
| Camta2_j2    | 19.8691     | 17.1009   | 0            | 1         | 1         |
| C1qbp_j1     | 27.8044     | 24.8157   | 0            | 1         | 1         |
| Dhx33_j5     | 0.345309    | 0.784243  | 0            | 1         | 1         |
| Derl2        | 8.51076     | 8.93466   | 0            | 1         | 1         |
| Pitpnm3_j8   | 0           | 0.0832727 | 1.79769e+308 | 0.003134  | 1         |
| Pitpnm3_j7   | 0.0129043   | 0.0718708 | 2.47756      | 0.0292942 | 1         |
| Slc13a5      | 0.0674289   | 0.0958423 | 0.507295     | 0.56076   | 1         |
| Slc13a5_j1   | 0.0297009   | 0.0739483 | 1.31601      | 0.346316  | 1         |
| Spns3_j6     | 0.0301918   | 0.0765266 | 1.34181      | 0.46331   | 1         |
| mKIAA1039_j8 | 0.237836    | 0.702176  | 0            | 1         | 1         |
| Pafah1b1_j4  | 0           | 0.772864  | 0            | 1         | 1         |
| Sgsm2_j4     | 0           | 0.802523  | 0            | 1         | 1         |
| Hic1         | 0.0268632   | 0.227574  | 3.08263      | 0.0041322 | 0.043964  |
| Rpa1_j4      | 8.19672     | 9.57032   | 0            | 1         | 1         |
| Rph3al_j1    | 0.202791    | 0.0518423 | -1.96779     | 0.092411  | 0.37398   |
| Rph3al_j2    | 0.00635464  | 0.200709  | 4.98115      | 0.0468766 | 0.248315  |
| Abr_j4       | 0.122403    | 0.460364  | 0            | 1         | 1         |
| Efcab5_j8    | 0.0367727   | 0.0927827 | 1.33522      | 0.435081  | 1         |
| Ankrd13b_j1  | 6.05543     | 7.30071   | 0            | 1         | 1         |
| Trp53i13     | 1.58164     | 1.83405   | 0.213611     | 0.115125  | 0.422076  |
| Taok1_j3     | 0           | 0.165727  | 0            | 1         | 1         |
| Pipox_j4     | 0.501084    | 0.349421  | -0.520088    | 0.388991  | 0.716261  |
| Rpl23a_j3    | 0.820728    | 0.821615  | 0            | 1         | 1         |
| Ksr1_j10     | 0.331174    | 0.411486  | 0.313253     | 0.394257  | 0.719811  |
| Ksr1_j12     | 0.304141    | 0.300577  | -0.017004    | 0.961244  | 0.988989  |
| Myo1d_j5     | 0.447238    | 0.549206  | 0            | 1         | 1         |
| Cct6b_j3     | 0.0487997   | 0.0542345 | 0.152341     | 0.891372  | 1         |
| Gm11423_j1   | 0.000313715 | 0.0494855 | 7.30141      | 0.868052  | 1         |
| Rffl_j2      | 0           | 0.072063  | 1.79769e+308 | 0.0096529 | 1         |
| Slfn9_j3     | 0.000152979 | 0.458443  | 0            | 1         | 1         |
| Slfn9        | 0.108838    | 0.0657875 | 0            | 1         | 1         |
| Slfn8_j5     | 0.0288892   | 0.106769  | 0            | 1         | 1         |
| Mmp28        | 0.108515    | 0.225975  | 0            | 1         | 1         |
| Mmp28        | 0           | 0.311156  | 0            | 1         | 1         |
| Tada2a_j6    | 0           | 0.439415  | 0            | 1         | 1         |
| Znhit3_j1    | 12.0821     | 14.7364   | 0.28651      | 0.0463831 | 0.246963  |
| Usp32_j1     | 0.193384    | 0.0780836 | 0            | 1         | 1         |
| Appbp2_j3    | 0.197018    | 0.671228  | 0            | 1         | 1         |
| Appbp2_j4    | 4.46048     | 4.30023   | 0            | 1         | 1         |
| Tmem49_j4    | 20.9373     | 18.3665   | 0            | 1         | 1         |
| Ppm1e_j2     | 4.31563     | 4.24638   | 0            | 1         | 1         |
| Utp18_j2     | 2.37263     | 2.78228   | 0.229779     | 0.450582  | 0.756203  |
| Nme1_j2      | 111.903     | 137.761   | 0.299918     | 0.004035  | 0.0431757 |
| Luc7l3       | 10.1434     | 10.2465   | 0            | 1         | 1         |
| Epn3_j5      | 0.0708303   | 0.380244  | 0            | 1         | 1         |
| Epn3_j6      | 0.148158    | 0.0741147 | 0            | 1         | 1         |
| Mycbpap_j3   | 0.451956    | 0.545205  | 0            | 1         | 1         |

|                  |            |           |              |           |           |
|------------------|------------|-----------|--------------|-----------|-----------|
| Rsad1_j1         | 0          | 0.23162   | 0            | 1         | 1         |
| Acsf2_j1         | 2.72281    | 2.84477   | 0            | 1         | 1         |
| Acsf2_j5         | 0.103457   | 0.347981  | 1.74998      | 0.316164  | 0.659988  |
| Xylt2_j3         | 1.75891    | 1.89166   | 0.104975     | 0.67835   | 0.879061  |
| Itga3_j9         | 13.9509    | 15.6475   | 0.165578     | 0.0830123 | 0.351047  |
| Itga3_j8         | 2.50951    | 0.711574  | -1.81832     | 3.98E-12  | 5.15E-10  |
| Nxph3_j1         | 2.17464    | 2.34677   | 0.109898     | 0.662912  | 0.872283  |
| Ngfr_j3          | 25.626     | 40.7321   | 0            | 1         | 1         |
| Snx11_j4         | 0          | 0.750652  | 0            | 1         | 1         |
| Cdk5rap3_j1      | 0          | 0.626416  | 1.79769e+308 | 0.0001208 | 0.0025167 |
| Sp2              | 0.110752   | 0.232823  | 1.0719       | 0.108016  | 0.408563  |
| AM295304         | 0.0128734  | 0.134159  | 3.38148      | 0.0209044 | 1         |
| Tbkbp1_j9        | 0.0884779  | 0.0590419 | 0            | 1         | 1         |
| Tbkbp1_j10       | 2.70477    | 2.3393    | 0            | 1         | 1         |
| Npepps_j1        | 12.2118    | 12.0966   | 0            | 1         | 1         |
| Gpr179_j2        | 0          | 0.0843242 | 1.79769e+308 | 0.0008367 | 1         |
| Gpr179_j3        | 1.43E-05   | 0.0502287 | 11.7744      | 0.942158  | 1         |
| Gpr179_j4        | 0          | 0.0558653 | 1.79769e+308 | 0.0054408 | 1         |
| Srcin1_j6        | 0.858922   | 0.554961  | 0            | 1         | 1         |
| Srcin1_j8        | 0.123943   | 0.0295732 | 0            | 1         | 1         |
| AK155239_j2      | 0.0201552  | 1.03499   | 0            | 1         | 1         |
| Rpl23_j5         | 0          | 0.079098  | 1.79769e+308 | 0.127141  | 1         |
| Rpl23_j4         | 0.193096   | 0.188819  | -0.0323183   | 0.972151  | 0.991962  |
| Plxdc1_j7        | 0          | 0.549513  | 1.79769e+308 | 2.28E-06  | 8.52E-05  |
| Med1_j1          | 0          | 0.209354  | 0            | 1         | 1         |
| 1810046J19Rik_j1 | 11.1147    | 12.8805   | 0            | 1         | 1         |
| Ikzf3_j3         | 0.187387   | 0.30577   | 0.706427     | 0.401864  | 0.725127  |
| Krt25_j1         | 0.523408   | 0.666698  | 0.349098     | 0.537234  | 0.807392  |
| Krt10_j3         | 0          | 0.0844474 | 1.79769e+308 | 0.232142  | 1         |
| Krt19_j1         | 0          | 0.232578  | 1.79769e+308 | 0.015426  | 0.117303  |
| Krt9_j3          | 0.0980945  | 0.112906  | 0.202877     | 0.867577  | 1         |
| Krt16            | 0.134142   | 0.364802  | 1.44336      | 0.0086534 | 0.0769612 |
| Klhl11_j1        | 2.71448    | 3.12633   | 0.203796     | 0.242363  | 0.589797  |
| Acly_j1          | 3.28108    | 3.04139   | 0            | 1         | 1         |
| Dnajc7_j1        | 5.0023     | 6.36824   | 0.348302     | 0.0009021 | 0.0131848 |
| Dnajc7_j8        | 0.914361   | 1.09003   | 0.253528     | 0.316456  | 0.660085  |
| Kat2a            | 0.54589    | 0.296266  | 0            | 1         | 1         |
| Kcnh4            | 0.0858718  | 0.214839  | 1.323        | 0.0066819 | 0.0635317 |
| Kcnh4_j4         | 0.00974869 | 0.216923  | 4.47583      | 0.128576  | 0.446769  |
| Kcnh4_j5         | 0          | 0.0655343 | 1.79769e+308 | 0.0636069 | 1         |
| Ptrf_j1          | 9.65458    | 14.0763   | 0.543979     | 1.08E-06  | 4.40E-05  |
| Psmc3ip_j1       | 0.345109   | 0.590663  | 0            | 1         | 1         |
| Fam134c_j2       | 6.3659     | 6.59136   | 0            | 1         | 1         |
| Plekhh3_j5       | 0          | 0.27648   | 1.79769e+308 | 0.0011465 | 0.0159571 |
| Ezh1_j2          | 0.293694   | 0.460812  | 0            | 1         | 1         |
| Ccdc56_j1        | 0.822438   | 0.908941  | 0.14428      | 0.516272  | 0.794854  |
| Brca1_j2         | 0.406783   | 0.269776  | -0.592497    | 0.3746    | 0.707248  |



|                  |           |           |               |           |           |
|------------------|-----------|-----------|---------------|-----------|-----------|
| Brca1_j4         | 0.0498401 | 0.123243  | 1.30612       | 0.122239  | 1         |
| Etv4_j2          | 0.278475  | 0.354111  | 0.346656      | 0.473868  | 0.770243  |
| Mpp3_j1          | 0.534769  | 0.755473  | 0.498463      | 0.287102  | 0.635532  |
| Atxn7l3_j3       | 0         | 0.318851  | 0             | 1         | 1         |
| Ubtf             | 0.416178  | 3.20305   | 0             | 1         | 1         |
| Ubtf             | 0         | 1.95939   | 0             | 1         | 1         |
| Itga2b_j1        | 0.0261922 | 0.171691  | 2.7126        | 0.0084462 | 0.0755595 |
| Gfap_j1          | 0         | 0.146882  | 1.79769e+308  | 0.0076523 | 1         |
| 1700023F06Rik_j2 | 0.217713  | 0.337228  | 0.631295      | 0.327557  | 0.670398  |
| 1700023F06Rik_j3 | 0.0426055 | 0.0784261 | 0.880294      | 0.56038   | 1         |
| 1700081L11Rik_j1 | 0.426137  | 0.135634  | 0             | 1         | 1         |
| 1700081L11Rik_j3 | 0.625018  | 0.58763   | 0             | 1         | 1         |
| Ftsj3_j3         | 0         | 0.31007   | 0             | 1         | 1         |
| Scn4a_j4         | 0.161203  | 0.301391  | 0             | 1         | 1         |
| Ddx5_j6          | 1.10419   | 1.46856   | 0             | 1         | 1         |
| Ddx5_j8          | 5.1597    | 4.73961   | 0             | 1         | 1         |
| Kpna2_j2         | 0         | 0.0921294 | 1.79769e+308  | 0.0889406 | 1         |
| Bptf_j6          | 0.488463  | 0.817554  | 0.743066      | 0.0001909 | 0.0036917 |
| Pitpnc1_j4       | 4.39341   | 6.73143   | 0             | 1         | 1         |
| Prkca_j3         | 0         | 2.78872   | 0             | 1         | 1         |
| Cdc42ep4_j4      | 1.16932   | 1.4528    | 0             | 1         | 1         |
| Sdk2_j4          | 0.100253  | 0.154177  | 0.620939      | 0.118821  | 1         |
| Cd300ld          | 0.169426  | 0.35178   | 1.05402       | 0.0073169 | 0.0681226 |
| AF251705_j2      | 0.0253788 | 0.392335  | 3.95039       | 0.0713906 | 0.321278  |
| AF251705_j4      | 0.175183  | 0.175056  | -0.00104376   | 0.999159  | 0.999631  |
| AF251705_j3      | 0.0724255 | 0.255814  | 1.82052       | 0.138604  | 0.463017  |
| Nat9_j3          | 0.327138  | 0.233476  | -0.486627     | 0.561008  | 0.82146   |
| Fdxr             | 1.6384    | 2.66362   | 0             | 1         | 1         |
| Sumo2_j3         | 0.153034  | 0.244481  | 0.675876      | 0.352307  | 0.68925   |
| Gga3_j2          | 1.22191   | 1.35472   | 0             | 1         | 1         |
| Gga3_j3          | 0.482431  | 0.454676  | 0             | 1         | 1         |
| Grb2_j1          | 16.9704   | 14.0327   | 0             | 1         | 1         |
| Grb2_j2          | 4.92975   | 12.4449   | 0             | 1         | 1         |
| Unc13d_j5        | 0.0496446 | 0         | -1.79769e+308 | 0.0311222 | 1         |
| Unc13d_j7        | 0         | 0.0594433 | 1.79769e+308  | 0.0196433 | 1         |
| Wbp2_j3          | 28.5419   | 3.59504   | 0             | 1         | 1         |
| Acox1_j2         | 19.7147   | 19.5756   | 0             | 1         | 1         |
| Acox1_j3         | 0         | 0.114444  | 0             | 1         | 1         |
| Exoc7_j3         | 4.99698   | 4.68671   | 0             | 1         | 1         |
| Rhbdf2_j5        | 0.332369  | 0.575574  | 0.792215      | 0.17659   | 0.515457  |
| Rhbdf2           | 1.05312   | 0.985202  | -0.0961781    | 0.692154  | 0.886063  |
| Cygb_j3          | 1.08931   | 0.724628  | 0             | 1         | 1         |
| St6galnac2_j6    | 0.124089  | 0.295455  | 1.25156       | 0.257916  | 0.606586  |
| Tha1_j2          | 0         | 0.254515  | 1.79769e+308  | 0.0035403 | 0.0392797 |
| Tha1_j3          | 0.0723665 | 0.0839093 | 0.213508      | 0.868005  | 1         |
| XLOC_005363      | 0         | 0.092     | 1.79769e+308  | 0.154559  | 1         |
| Usp36_j3         | 0         | 0.0613605 | 0             | 1         | 1         |

|                  |           |           |               |           |           |
|------------------|-----------|-----------|---------------|-----------|-----------|
| Timp2_j2         | 0.43794   | 0.333919  | 0             | 1         | 1         |
| Cant1_j3         | 7.06179   | 8.61421   | 0             | 1         | 1         |
| Rbfox3_j3        | 0.666261  | 0.865022  | 0             | 1         | 1         |
| Rbfox3_j4        | 16.169    | 2.67175   | 0             | 1         | 1         |
| Tbc1d16_j2       | 6.17E-05  | 0.231052  | 0             | 1         | 1         |
| Aatk_j8          | 9.88242   | 12.5369   | 0             | 1         | 1         |
| 2810410L24Rik_j1 | 0.0239838 | 0.0931576 | 1.95762       | 0.120351  | 1         |
| 2310003H01Rik_j2 | 0         | 0.158664  | 0             | 1         | 1         |
| Pcyt2_j3         | 22.1559   | 27.0386   | 0             | 1         | 1         |
| Sirt7_j1         | 3.70249   | 3.46732   | 0             | 1         | 1         |
| Sirt7_j2         | 0.0467212 | 0.0233231 | 0             | 1         | 1         |
| Sirt7_j10        | 0.908024  | 1.19377   | 0             | 1         | 1         |
| Notum_j2         | 0         | 0.0894449 | 1.79769e+308  | 0.02556   | 1         |
| Cbr2_j1          | 0         | 0.294724  | 1.79769e+308  | 0.0142125 | 0.110668  |
| Fasn             | 16.8468   | 12.8823   | -0.387084     | 3.31E-05  | 0.0008426 |
| Rab40b_j2        | 0.106122  | 0.0947738 | -0.163167     | 0.894286  | 1         |
| mazr_j1          | 0.17106   | 0.583547  | 0             | 1         | 1         |
| mazr_j3          | 0.319737  | 0.402256  | 0             | 1         | 1         |
| mazr_j2          | 0.371781  | 0.363142  | 0             | 1         | 1         |
| Selm_j2          | 13.3273   | 15.8371   | 0.248919      | 0.315096  | 0.659071  |
| Morc2a_j5        | 0.139974  | 0.182482  | 0.382594      | 0.47504   | 0.770913  |
| Pes1_j4          | 0.515563  | 0.374787  | -0.46008      | 0.431435  | 0.743586  |
| Gal3st1_j1       | 1.24196   | 1.59973   | 0             | 1         | 1         |
| Ascc2_j1         | 0.776726  | 1.1561    | 0             | 1         | 1         |
| XLOC_003913      | 0.15127   | 0.161685  | 0.0960657     | 0.903529  | 0.969103  |
| Aebp1_j1         | 0         | 0.0610438 | 1.79769e+308  | 0.0551347 | 1         |
| Adcy1_j3         | 2.96277   | 2.27938   | -0.378304     | 0.0015461 | 0.0202424 |
| Vwc2_j2          | 1.56131   | 2.06654   | 0.404464      | 0.0721182 | 0.323001  |
| Egfr_j4          | 0.105591  | 0.0878611 | -0.265192     | 0.720679  | 1         |
| XLOC_003953      | 0         | 0.0858895 | 1.79769e+308  | 0.105349  | 1         |
| Sertad2          | 0.270094  | 0.222861  | 0             | 1         | 1         |
| Cct4_j4          | 19.7697   | 23.2358   | 0             | 1         | 1         |
| Fam161a_j7       | 0         | 0.173182  | 1.79769e+308  | 0.0153649 | 0.117034  |
| Fam161a_j8       | 0.313558  | 0         | -1.79769e+308 | 8.10E-07  | 3.46E-05  |
| Fam161a_j9       | 0.254515  | 0.276966  | 0.121962      | 0.784042  | 0.927342  |
| Gm12059_j1       | 0.0818061 | 0.228691  | 1.48312       | 0.136842  | 0.459937  |
| Xpo1_j6          | 0         | 0.171851  | 0             | 1         | 1         |
| Xpo1_j7          | 0.605455  | 0.732012  | 0             | 1         | 1         |
| Usp34_j1         | 0.0305829 | 0.0755409 | 1.30453       | 0.0586416 | 1         |
| Usp34_j8         | 1.46556   | 1.28105   | -0.194126     | 0.334595  | 0.675359  |
| Bcl11a_j2        | 0.442703  | 0.475493  | 0.103085      | 0.889432  | 0.964959  |
| Fancl_j4         | 0         | 0.233904  | 1.79769e+308  | 0.0281856 | 0.178163  |
| Efemp1_j2        | 1.3171    | 1.87312   | 0.508074      | 0.0858352 | 0.357676  |
| Smek2_j2         | 0.0265889 | 0.0604725 | 1.18546       | 0.124885  | 1         |
| Mtif2_j1         | 1.23121   | 1.09492   | 0             | 1         | 1         |
| Mtif2            | 2.47083   | 2.46041   | 0             | 1         | 1         |
| Rtn4_j5          | 0         | 1.9131    | 1.79769e+308  | 3.07E-15  | 6.25E-13  |

|                  |           |           |              |           |           |
|------------------|-----------|-----------|--------------|-----------|-----------|
| Rtn4_j6          | 0.132018  | 0.275334  | 1.06045      | 0.114026  | 0.419996  |
| Asb3_j2          | 0         | 0.107278  | 1.79769e+308 | 0.0027524 | 1         |
| Fbxw11           | 25.3295   | 27.8147   | 0            | 1         | 1         |
| Fbxw11           | 1.33182   | 1.38641   | 0            | 1         | 1         |
| Fbxw11           | 1.2049    | 1.22167   | 0            | 1         | 1         |
| Fbxw11           | 10.5607   | 9.8327    | 0            | 1         | 1         |
| XLOC_003992      | 0         | 0.264445  | 1.79769e+308 | 0.145146  | 0.472985  |
| XLOC_003992      | 0.0595706 | 0.029835  | -0.997594    | 0.544765  | 1         |
| Slit3_j2         | 0         | 0.109313  | 1.79769e+308 | 0.0407822 | 1         |
| Slu7_j1          | 0         | 0.898541  | 0            | 1         | 1         |
| Ccnjl_j1         | 0         | 0.0781207 | 1.79769e+308 | 0.0299846 | 1         |
| XLOC_004013      | 0.070014  | 0.14653   | 1.06548      | 0.12049   | 1         |
| Rnf145_j4        | 2.95298   | 4.30683   | 0            | 1         | 1         |
| Ebf4_j5          | 1.1875    | 2.55241   | 0            | 1         | 1         |
| Trim7_j4         | 0.0741398 | 0.309131  | 0            | 1         | 1         |
| Zfp62_j1         | 0.818102  | 0.995972  | 0            | 1         | 1         |
| XLOC_004027      | 0.0363272 | 0.0510904 | 0            | 1         | 1         |
| Mgat1_j1         | 4.23288   | 3.61841   | 0            | 1         | 1         |
| Gfpt2_j3         | 0.114534  | 0.368381  | 1.68542      | 0.0262692 | 0.170132  |
| Mapk9_j1         | 2.89898   | 1.0284    | 0            | 1         | 1         |
| XLOC_004034      | 0.0650229 | 0.162148  | 1.31829      | 0.423309  | 0.738697  |
| 3010026O09Rik_j1 | 10.4176   | 11.3735   | 0            | 1         | 1         |
| Hnrnph1_j4       | 3.55714   | 3.30013   | -0.108194    | 0.657501  | 0.869501  |
| Hnrnph1_j5       | 0.20091   | 0.304112  | 0.598051     | 0.449157  | 0.755415  |
| Hnrnph1_j7       | 1.56464   | 1.57776   | 0.0120445    | 0.969561  | 0.991454  |
| Hnrnph1_j6       | 1.39572   | 1.51934   | 0.122429     | 0.702259  | 0.890877  |
| Clk4_j1          | 0.0118541 | 0.155809  | 0            | 1         | 1         |
| Agxt2l2_j4       | 6.83425   | 7.49834   | 0.133788     | 1         | 1         |
| Ppp2ca_j2        | 22.5236   | 27.3177   | 0            | 1         | 1         |
| Skp1a_j2         | 2.28659   | 2.49418   | 0            | 1         | 1         |
| Vdac1_j6         | 60.1625   | 71.9866   | 0            | 1         | 1         |
| Aff4_j2          | 0.204396  | 0.224079  | 0            | 1         | 1         |
| Gdf9_j1          | 2.38948   | 2.28847   | -0.0623134   | 0.680563  | 0.879921  |
| Kif3a_j2         | 4.15246   | 5.64836   | 0            | 1         | 1         |
| Slc36a1_j3       | 37.2601   | 37.7025   | 0            | 1         | 1         |
| G3bp1_j3         | 0.163742  | 0.0595442 | 0            | 1         | 1         |
| XLOC_004075      | 0.0533953 | 0.0658978 | 0.303517     | 0.818821  | 1         |
| Sap30l_j1        | 11.2994   | 19.536    | 0            | 1         | 1         |
| Larp1_j2         | 0.209701  | 0.274108  | 0            | 1         | 1         |
| Mrpl22_j4        | 3.49E-05  | 0.623065  | 14.1225      | 0.94531   | 0.983703  |
| Igtp_j3          | 0.827905  | 0.654559  | 0            | 1         | 1         |
| Irgm2            | 0.917671  | 0.880625  | 0            | 1         | 1         |
| Zfp692-ps_j1     | 2.02202   | 2.23554   | 0.144822     | 0.553309  | 0.817135  |
| Zfp692-ps_j8     | 1.00673   | 1.32089   | 0.391836     | 0.0834564 | 0.352255  |
| Trim17_j1        | 3.50487   | 4.99148   | 0.510107     | 0.002872  | 0.0332502 |
| 4933439C10Rik_j1 | 1.02242   | 1.02768   | 0            | 1         | 1         |
| Lrrc48_j1        | 0.576969  | 0.37895   | 0            | 1         | 1         |

|                  |             |           |              |           |           |
|------------------|-------------|-----------|--------------|-----------|-----------|
| Lrrc48           | 1.04483     | 0.901207  | 0            | 1         | 1         |
| Myo15_j6         | 0.115757    | 0.110824  | -0.0628358   | 0.936606  | 1         |
| Myo15_j11        | 0.0757653   | 0.0402346 | -0.913101    | 0.501448  | 1         |
| Alkbh5_j2        | 6.86787     | 6.73591   | 0            | 1         | 1         |
| Smcr7_j4         | 1.33202     | 1.26724   | 0            | 1         | 1         |
| Smcr7_j5         | 0.402925    | 0.152125  | 0            | 1         | 1         |
| Specc1_j5        | 0.163598    | 0.256345  | 0            | 1         | 1         |
| Trpv2            | 17.9308     | 23.9855   | 0            | 1         | 1         |
| Trpv2_j5         | 14.7967     | 20.6102   | 0            | 1         | 1         |
| Mmgt2_j3         | 0.000751903 | 1.52699   | 10.9879      | 0.483128  | 0.775896  |
| Fam18b_j1        | 0.391643    | 0.497043  | 0.343832     | 0.688225  | 0.884104  |
| Cdrt4_j3         | 0.10659     | 0.119373  | 0.163408     | 0.837228  | 1         |
| Elac2_j2         | 0.281927    | 0.280495  | 0            | 1         | 1         |
| Zkscan6_j1       | 0           | 0.120963  | 0            | 1         | 1         |
| Zkscan6_j2       | 0.646883    | 0.215789  | 0            | 1         | 1         |
| Zkscan6_j3       | 0.0672383   | 0.301902  | 0            | 1         | 1         |
| Pirt_j2          | 0.770949    | 0.398929  | 0            | 1         | 1         |
| 9130409J20Rik_j6 | 0.0541853   | 0.584852  | 3.4321       | 0.0008393 | 0.0124502 |
| Tmem220_j3       | 0           | 0.06472   | 1.79769e+308 | 0.0875764 | 1         |
| Sco1_j2          | 0.400137    | 0.349274  | 0            | 1         | 1         |
| Sco1_j1          | 1.19167     | 1.26764   | 0            | 1         | 1         |
| Myh8_j5          | 0           | 0.133072  | 1.79769e+308 | 0.0032118 | 1         |
| Myh8_j7          | 0.0609206   | 0.0787521 | 0.370387     | 0.766549  | 1         |
| Gas7_j2          | 0           | 0.507114  | 0            | 1         | 1         |
| Gas7_j1          | 0.0745965   | 0.934899  | 0            | 1         | 1         |
| Pik3r5_j1        | 0.0189619   | 0.130147  | 2.77896      | 0.0118938 | 1         |
| Pik3r5_j3        | 0           | 0.0902154 | 1.79769e+308 | 0.0093694 | 1         |
| Pik3r6_j4        | 0.125273    | 0.127756  | 0.0283143    | 0.974428  | 1         |
| 1500010J02Rik_j9 | 0           | 0.42613   | 0            | 1         | 1         |
| Per1_j3          | 0.879791    | 1.09413   | 0.314555     | 0.204095  | 0.548338  |
| Per1_j5          | 1.17841     | 1.9117    | 0.698017     | 0.0045244 | 0.0471281 |
| Alox12b_j2       | 0.199438    | 0.13901   | -0.520758    | 0.49406   | 0.782369  |
| Trp53_j8         | 5.57731     | 5.5215    | -0.0145084   | 0.952702  | 0.986322  |
| Sat2_j1          | 2.02745     | 1.89519   | -0.0973247   | 0.762452  | 0.918142  |
| Zbtb4_j1         | 5.49866     | 4.08353   | 0            | 1         | 1         |
| Zbtb4_j3         | 4.52968     | 4.3046    | 0            | 1         | 1         |
| Gps2_j6          | 0.342029    | 0.460571  | 0            | 1         | 1         |
| Phf23_j3         | 0           | 0.203953  | 1.79769e+308 | 0.0168017 | 0.124749  |
| Phf23_j4         | 0           | 0.4247    | 1.79769e+308 | 0.0021756 | 0.0266564 |
| Mgl2_j2          | 0.243194    | 0.0551398 | -2.14094     | 0.100877  | 0.393239  |
| Pld2_j11         | 0.846769    | 0.926139  | 0.12926      | 0.697165  | 0.888506  |
| XLOC_004200      | 0.0466222   | 0.0764943 | 0.714336     | 0.48598   | 1         |
| Eno3_j1          | 3.32897     | 3.60215   | 0.113783     | 0.442217  | 0.750452  |
| Kif1c_j3         | 0.961155    | 0.810185  | 0            | 1         | 1         |
| Rabep1_j1        | 0.808386    | 0.410872  | 0            | 1         | 1         |
| Mybbp1a_j2       | 5.26234     | 6.12398   | 0            | 1         | 1         |
| Ube2g1_j1        | 8.95061     | 10.6711   | 0            | 1         | 1         |

|                  |             |             |              |           |           |
|------------------|-------------|-------------|--------------|-----------|-----------|
| Ankfy1_j3        | 0.158119    | 0.0932586   | -0.761699    | 0.15933   | 0.493926  |
| Atp2a3           | 0.634299    | 0.53722     | -0.23965     | 0.370676  | 0.703732  |
| Trpv1_j3         | 2.89711     | 4.05675     | 0.48571      | 0.0052073 | 0.0523072 |
| 1300001I01Rik_j2 | 0           | 0.0533556   | 1.79769e+308 | 0.0451135 | 1         |
| 1300001I01Rik_j3 | 1.01961     | 1.01303     | -0.00933141  | 0.972351  | 0.991962  |
| Mnt_j1           | 4.35162     | 3.2227      | 0            | 1         | 1         |
| XLOC_004229      | 0.213946    | 0.328348    | 0            | 1         | 1         |
| Smg6_j1          | 2.42223     | 2.29324     | 0            | 1         | 1         |
| Rilp_j4          | 0.758071    | 0.668283    | -0.181874    | 0.742416  | 0.909901  |
| Inpp5k_j2        | 1.48324     | 1.4742      | 0            | 1         | 1         |
| Ywhae_j1         | 6.98278     | 9.0719      | 0.377603     | 0.0071174 | 0.0667355 |
| Ywhae_j3         | 0.14683     | 0.391617    | 1.41529      | 0.219419  | 0.566003  |
| Ywhae_j6         | 0.153778    | 0.550835    | 1.84078      | 0.0868965 | 0.360342  |
| Tusc5_j3         | 6.09577     | 12.4386     | 0            | 1         | 1         |
| Tmigd1_j1        | 0.0422142   | 0.175598    | 2.05647      | 0.103616  | 0.39914   |
| Coro6_j1         | 0.778113    | 0.588346    | 0            | 1         | 1         |
| Coro6_j2         | 4.04997     | 2.50022     | 0            | 1         | 1         |
| Coro6_j3         | 5.7392      | 3.49349     | 0            | 1         | 1         |
| Coro6_j4         | 4.2792      | 2.80026     | 0            | 1         | 1         |
| Git1_j1          | 0.330109    | 0.34134     | 0.0482658    | 0.869337  | 0.958432  |
| Myo18a           | 9.21219     | 8.86216     | 0            | 1         | 1         |
| Sez6_j1          | 0.000817001 | 0.749832    | 0            | 1         | 1         |
| Sez6_j3          | 2.1161      | 3.63352     | 0            | 1         | 1         |
| Tlcd1_j2         | 1.3092      | 1.24025     | 0            | 1         | 1         |
| Rab34_j3         | 1.68658     | 2.21031     | 0.390148     | 0.0961768 | 0.382865  |
| Proca1_j1        | 0           | 0.0756307   | 1.79769e+308 | 0.0959924 | 1         |
| Rab11fip4_j5     | 0           | 0.139053    | 0            | 1         | 1         |
| XLOC_004285      | 0           | 0.0895032   | 1.79769e+308 | 0.0038476 | 1         |
| XLOC_004287      | 0.0380859   | 0.0597904   | 0.650656     | 0.705369  | 1         |
| Atad5_j5         | 0.00367983  | 0.207809    | 5.81947      | 0.0114137 | 0.0945238 |
| Adap2            | 0.119987    | 0.166323    | 0.471114     | 0.410951  | 0.730555  |
| Adap2_j1         | 0           | 0.0978526   | 1.79769e+308 | 0.0172847 | 1         |
| Rhot1_j5         | 0.0634273   | 0.0329487   | -0.944883    | 0.563482  | 1         |
| Rhot1_j7         | 4.01855     | 5.13097     | 0.352558     | 0.180913  | 0.520777  |
| Rhbdl3_j1        | 1.32642     | 0.897851    | -0.562985    | 0.0330114 | 0.197926  |
| Psm11            | 0.564187    | 0.49457     | -0.19        | 0.579635  | 0.831029  |
| Psm11_j3         | 0.378606    | 0.839304    | 1.1485       | 0.0033865 | 0.0379445 |
| Tmem132e_j5      | 13.618      | 10.0769     | 0            | 1         | 1         |
| Ap2b1_j5         | 43.9473     | 47.7809     | 0.120661     | 0.165608  | 0.502238  |
| Taf15_j7         | 0.240273    | 0.448219    | 0.899528     | 0.166919  | 0.503257  |
| Taf15_j8         | 1.35854     | 1.65939     | 0.2886       | 0.405295  | 0.726998  |
| Heatr6_j1        | 0.286619    | 0.000334739 | 0            | 1         | 1         |
| Heatr6_j3        | 0.019589    | 0.51072     | 0            | 1         | 1         |
| Hnf1b            | 0.196799    | 0.273883    | 0.47684      | 0.274526  | 0.6237    |
| Acaca_j17        | 2.07056     | 1.63297     | -0.342518    | 0.427028  | 0.741449  |
| Bcas3_j3         | 0.450338    | 0.772571    | 0            | 1         | 1         |
| Bcas3_j4         | 1.35005     | 0.427384    | 0            | 1         | 1         |

|                  |            |           |              |           |           |
|------------------|------------|-----------|--------------|-----------|-----------|
| Tubd1_j7         | 0.0370762  | 0.0700253 | 0.917382     | 0.5925    | 1         |
| Tex14_j1         | 0.0644117  | 0.144558  | 1.16625      | 0.226214  | 1         |
| Bzrap1_j14       | 2.97912    | 2.6098    | -0.190945    | 0.266533  | 0.615602  |
| AK040276_j1      | 0.0774218  | 0.123307  | 0.671448     | 0.544432  | 1         |
| Cuedc1_j2        | 2.96011    | 3.57866   | 0.273771     | 0.0968061 | 0.38433   |
| Coil_j1          | 0.05762    | 0.424389  | 2.88074      | 0.0044466 | 0.0465096 |
| Gm10022          | 0.00365727 | 0.526626  | 7.16987      | 0.29741   | 0.643996  |
| Mbtd1_j3         | 0.200997   | 0.117452  | -0.775101    | 0.400398  | 0.723889  |
| Mbtd1_j2         | 0          | 0.0956352 | 1.79769e+308 | 0.0527515 | 1         |
| Mbtd1_j7         | 0.262914   | 0.293285  | 0            | 1         | 1         |
| Col1a1_j2        | 4.48237    | 7.53332   | 0.749024     | 1.82E-07  | 9.08E-06  |
| Ppp1r9b_j2       | 0          | 0.088856  | 1.79769e+308 | 0.0449129 | 1         |
| Ppp1r9b_j4       | 0          | 0.77152   | 1.79769e+308 | 4.95E-06  | 0.0001677 |
| Samd14_j7        | 0.364686   | 0.444852  | 0.286672     | 0.679452  | 0.879493  |
| Slc35b1_j2       | 6.67558    | 7.50939   | 0            | 1         | 1         |
| Spop_j2          | 1.53674    | 3.21935   | 1.0669       | 3.50E-08  | 2.16E-06  |
| Spop_j6          | 29.0005    | 32.6595   | 0.171423     | 0.0541862 | 0.271315  |
| Phb_j2           | 0.0551797  | 0.15575   | 1.49702      | 0.419984  | 1         |
| Gngt2_j4         | 0          | 0.37121   | 1.79769e+308 | 0.0189492 | 0.13587   |
| Ttll6_j1         | 0.0918063  | 0.220186  | 1.26206      | 0.0136097 | 0.107311  |
| Skap1_j1         | 0          | 0.115816  | 1.79769e+308 | 0.0548564 | 1         |
| Copz2_j1         | 3.4787     | 2.54263   | -0.452223    | 0.148713  | 0.477528  |
| D030028A08Rik_j1 | 0.144225   | 0.270167  | 0.905526     | 0.0742906 | 0.328593  |
| Mrpl10_j3        | 7.80699    | 7.62925   | 0            | 1         | 1         |
| Socs7_j2         | 1.10288    | 1.15863   | 0            | 1         | 1         |
| Arhgap23_j3      | 0.122063   | 0.122477  | 0            | 1         | 1         |
| Arhgap23_j4      | 0          | 0.232263  | 0            | 1         | 1         |
| Psmb3_j6         | 2.55923    | 1.87739   | -0.446984    | 0.218134  | 0.564496  |
| Lasp1_j3         | 0          | 0.0547354 | 0            | 1         | 1         |
| Lasp1_j6         | 0.95803    | 0.530884  | 0            | 1         | 1         |
| Cdk12_j1         | 1.32458    | 2.00125   | 0            | 1         | 1         |
| Cdk12_j2         | 0.200115   | 0.219179  | 0            | 1         | 1         |
| Erbp2_j2         | 1.45336    | 1.90842   | 0            | 1         | 1         |
| Thra_j4          | 27.5996    | 39.8138   | 0.528618     | 1.58E-06  | 6.13E-05  |
| Wipf2_j1         | 1.75616    | 2.1857    | 0            | 1         | 1         |
| Ttc25_j7         | 0.0634365  | 0.270176  | 2.09051      | 0.239912  | 0.587265  |
| Stat5a           | 0.151428   | 0.691631  | 0            | 1         | 1         |
| Tubg1            | 7.171      | 7.18358   | 0.00252902   | 0.987113  | 0.996293  |
| Vps25_j5         | 2.62371    | 1.83691   | -0.514327    | 0.229369  | 0.576443  |
| Cntd1_j1         | 0.0444505  | 0.208261  | 2.22812      | 0.144036  | 0.471055  |
| Aoc3_j2          | 0          | 0.0837392 | 1.79769e+308 | 0.009453  | 1         |
| Tmem106a_j1      | 0          | 0.170435  | 0            | 1         | 1         |
| Rdm1_j4          | 0.0911125  | 0.120852  | 0.407522     | 0.70639   | 1         |
| Cd300lg_j1       | 0.0582546  | 0.0834113 | 0.517871     | 0.649631  | 1         |
| G6pc3_j2         | 0.4335     | 0.97738   | 1.17289      | 0.0261235 | 0.169612  |
| Rundc3a          | 19.709     | 24.2439   | 0            | 1         | 1         |
| Grn_j1           | 4.28862    | 9.66477   | 1.17222      | 1.82E-10  | 1.74E-08  |

|                  |             |           |              |           |           |
|------------------|-------------|-----------|--------------|-----------|-----------|
| Adam11_j12       | 1.46616     | 2.15126   | 0            | 1         | 1         |
| Adam11_j11       | 4.31553     | 3.06329   | 0            | 1         | 1         |
| Ccdc103_j3       | 0.0411795   | 0.289164  | 0            | 1         | 1         |
| Acbd4_j2         | 0.484625    | 0.399817  | 0            | 1         | 1         |
| Fmnl1_j10        | 1.40145     | 1.10913   | -0.337502    | 0.288253  | 0.636106  |
| Crhr1_j1         | 0.0643919   | 0.0656415 | 0.0277293    | 0.986524  | 1         |
| Tlk2_j1          | 0.672584    | 0.820982  | 0.287636     | 0.229386  | 0.576443  |
| Tlk2_j9          | 0.34317     | 0.347745  | 0.0191047    | 0.979637  | 0.994006  |
| Tanc2_j1         | 1.05541     | 0.708226  | -0.575518    | 0.0022209 | 0.0270685 |
| Map3k3_j3        | 0.000121303 | 1.11834   | 0            | 1         | 1         |
| Allergin-1_j1    | 0.18257     | 0.221835  | 0.281043     | 0.372741  | 0.705702  |
| 1810010H24Rik    | 0.0612612   | 0.0619839 | 0.0169201    | 0.99035   | 1         |
| Ccdc46_j5        | 0           | 0.220881  | 1.79769e+308 | 5.80E-05  | 0.0013526 |
| Axin2_j1         | 0.762687    | 0.517755  | 0            | 1         | 1         |
| Amz2_j3          | 1.62246     | 1.20081   | -0.434174    | 0.297176  | 0.643783  |
| Amz2             | 2.24135     | 2.06729   | -0.116621    | 0.682033  | 0.880617  |
| Amz2_j4          | 1.25076     | 1.87798   | 0.586377     | 0.363347  | 0.697495  |
| Arsg_j1          | 0.123035    | 0.609286  | 0            | 1         | 1         |
| Prkar1a_j2       | 3.26407     | 2.88464   | -0.178283    | 0.520348  | 0.797861  |
| XLOC_004541      | 0.00187959  | 0.116886  | 5.95854      | 0.238086  | 1         |
| XLOC_004541      | 0.175704    | 0.214201  | 0.285823     | 0.583636  | 0.833132  |
| Rpl38_j5         | 0.286278    | 0.46302   | 0.693657     | 0.0711197 | 0.320621  |
| Ttyh2_j3         | 1.24844     | 1.36175   | 0            | 1         | 1         |
| Dnaic2_j5        | 0.0883589   | 0.0776531 | 0            | 1         | 1         |
| Kif19a_j3        | 0           | 0.176411  | 0            | 1         | 1         |
| Slc9a3r1         | 8.51112     | 13.4472   | 0            | 1         | 1         |
| Slc9a3r1_j1      | 26.9137     | 21.3447   | 0            | 1         | 1         |
| Cdr2l_j1         | 1.61959     | 1.48496   | -0.125207    | 0.562952  | 0.822297  |
| Kctd2_j1         | 0.353255    | 0.378296  | 0.0988067    | 0.823453  | 0.943077  |
| 2310067B10Rik_j5 | 0.657796    | 0.397718  | 0            | 1         | 1         |
| 2310067B10Rik_j9 | 2.81235     | 2.47367   | 0            | 1         | 1         |
| Llgl2_j1         | 0           | 0.0762887 | 1.79769e+308 | 0.10447   | 1         |
| 2210020M01Rik_j1 | 1.43991     | 1.2648    | -0.187076    | 0.624677  | 0.853434  |
| Unk_j4           | 0.313541    | 0.354525  | 0            | 1         | 1         |
| Cdk3_j2          | 0.38135     | 0.382997  | 0            | 1         | 1         |
| Sphk1            | 2.14725     | 2.16797   | 0.013851     | 0.955569  | 0.987197  |
| 1810032O08Rik_j3 | 0.115564    | 0.326566  | 1.49868      | 0.116952  | 0.425169  |
| Tmc8_j1          | 0           | 0.049197  | 1.79769e+308 | 0.0838211 | 1         |
| Tmc8             | 0.066962    | 0.0304117 | -1.13872     | 0.4217    | 1         |
| Pgs1             | 4.65937     | 6.69213   | 0            | 1         | 1         |
| XLOC_004590      | 0.209022    | 0.184152  | -0.182762    | 0.799199  | 0.933125  |
| C1qtnf1_j3       | 2.78568     | 3.58842   | 0            | 1         | 1         |
| Cbx2_j3          | 0.167259    | 0.337333  | 1.01209      | 0.0423252 | 0.2326    |
| Cbx2_j5          | 0           | 0.164641  | 1.79769e+308 | 0.0025888 | 0.0306781 |
| Rnf213_j4        | 0.113717    | 0.212438  | 0            | 1         | 1         |
| Rptor_j1         | 0           | 0.154895  | 0            | 1         | 1         |
| Rptor_j3         | 2.51604     | 2.57808   | 0            | 1         | 1         |

|                  |            |                        |            |           |           |
|------------------|------------|------------------------|------------|-----------|-----------|
| Bahcc1_j8        | 0.024735   | 0.0727485              | 1.55636    | 0.0337881 | 1         |
| Hgs_j10          | 32.7971    | 38.085                 | 0.215656   | 0.0209139 | 0.145317  |
| Slc25a10_j1      | 0          | 0.423696 1.79769e+308  |            | 0.00068   | 0.0104867 |
| Lrrc45_j5        | 2.52288    | 3.59814                | 0          | 1         | 1         |
| Slc16a3          | 1.06107    | 1.05529                | -0.0078805 | 0.973837  | 0.992504  |
| Slc16a3_j1       | 0          | 0.288332 1.79769e+308  |            | 0.0011739 | 0.0162557 |
| Foxk2_j1         | 6.67596    | 7.23288                | 0          | 1         | 1         |
| Foxk2            | 2.3592     | 2.13641                | 0          | 1         | 1         |
| Foxk2_j4         | 1.43053    | 2.22735                | 0          | 1         | 1         |
| Fn3k             | 5.64937    | 4.25492                | 0          | 1         | 1         |
| Tbcd_j2          | 10.5301    | 13.1045                | 0          | 1         | 1         |
| Tbcd_j7          | 14.9148    | 24.0445                | 0          | 1         | 1         |
| Rnf185_j3        | 2.52507    | 1.60384                | 0          | 1         | 1         |
| Inpp5j_j5        | 0.382348   | 0.401592               | 0          | 1         | 1         |
| Osbp2_j1         | 3.1682     | 3.22525                | 0          | 1         | 1         |
| 4921536K21Rik    | 0.271991   | 0.221052               | -0.299172  | 0.560638  | 0.821119  |
| 4921536K21Rik_j1 | 0.00661681 | 0.0848453              | 3.68063    | 0.372586  | 1         |
| XLOC_004645      | 0.282893   | 0.313692               | 0.149091   | 0.808932  | 0.937258  |
| Ccdc157_j6       | 0.0345744  | 0.0660225              | 0.933254   | 0.172532  | 1         |
| Ccdc157          | 2.17285    | 1.82645                | -0.250551  | 0.0472276 | 0.249463  |
| Mttr3_j1         | 0          | 0.0577863              | 0          | 1         | 1         |
| Mttr3_j2         | 0          | 0.058617               | 0          | 1         | 1         |
| Uqcr10_j2        | 14.1295    | 13.4657                | -0.0694219 | 0.692511  | 0.886124  |
| Uqcr10           | 79.8821    | 81.3848                | 0.0268867  | 0.798104  | 0.932954  |
| Nf2_j5           | 0.0445698  | 0.32533                | 0          | 1         | 1         |
| Nefh_j3          | 0          | 0.108518               | 0          | 1         | 1         |
| Gas2l1_j6        | 1.53137    | 1.44918                | 0          | 1         | 1         |
| Ewsr1_j4         | 0.573173   | 2.09587                | 0          | 1         | 1         |
| Znrf3_j1         | 0.744087   | 0.767152               | 0.0440423  | 0.805524  | 0.935685  |
| XLOC_004660      | 0.0324946  | 0.146014               | 2.16784    | 0.133818  | 1         |
| Urgcp_j1         | 0.885096   | 0.979485               | 0          | 1         | 1         |
| Polm_j4          | 0.374274   | 0.570216               | 0.607413   | 0.125641  | 0.441555  |
| Camk2b_j1        | 0.0398122  | 0.0810168              | 0          | 1         | 1         |
| Camk2b_j2        | 0.735969   | 0.792533               | 0          | 1         | 1         |
| mKIAA1068        | 0.602358   | 0.379385               | 0          | 1         | 1         |
| Npc1l1_j1        | 0          | 0.108564 1.79769e+308  |            | 0.0575799 | 1         |
| Myo1g_j7         | 0.0946534  | 0.198643               | 1.06945    | 0.0400415 | 0.223971  |
| Nacad_j2         | 1.7382     | 3.92854                | 0          | 1         | 1         |
| Tns3_j7          | 5.02066    | 3.88788                | 0          | 1         | 1         |
| Hus1             | 0.206243   | 0.231638               | 0          | 1         | 1         |
| Zpbp_j9          | 0          | 0.0958249 1.79769e+308 |            | 0.0578715 | 1         |
| Grb10_j3         | 2.78103    | 3.78029                | 0          | 1         | 1         |
| Cobl_j5          | 1.23423    | 2.2885                 | 0          | 1         | 1         |
| Cobl_j4          | 0.326614   | 0.720821               | 0          | 1         | 1         |
| Cobl             | 4.51796    | 3.12337                | 0          | 1         | 1         |
| Etaa1            | 1.10392    | 1.2713                 | 0          | 1         | 1         |
| Meis1_j3         | 0.920878   | 0.798355               | -0.205981  | 0.571007  | 0.826539  |



|             |           |           |              |           |           |
|-------------|-----------|-----------|--------------|-----------|-----------|
| XLOC_004705 | 0.181507  | 0.162908  | -0.155969    | 0.879795  | 0.961537  |
| Mdh1_j4     | 28.0965   | 40.4039   | 0            | 1         | 1         |
| Ehbp1_j6    | 0         | 0.219662  | 0            | 1         | 1         |
| Ehbp1_j10   | 1.73998   | 2.87926   | 0            | 1         | 1         |
| Ehbp1_j13   | 0.223118  | 0.396698  | 0            | 1         | 1         |
| B3gnt2_j2   | 12.8368   | 13.3815   | 0            | 1         | 1         |
| Commd1_j2   | 9.24923   | 8.10664   | 0            | 1         | 1         |
| Ahsa2_j1    | 0.56283   | 1.49914   | 1.41337      | 4.49E-05  | 0.0010878 |
| Ccdc85a_j1  | 2.69228   | 2.43751   | 0            | 1         | 1         |
| Eml6_j1     | 0.0760284 | 0.157568  | 0            | 1         | 1         |
| Acyp2_j3    | 16.5066   | 18.6037   | 0.172543     | 0.363977  | 0.698139  |
| XLOC_004745 | 0.0561236 | 0.0909694 | 0.696774     | 0.58257   | 1         |
| Rhbdf1_j2   | 0.30052   | 0.417096  | 0            | 1         | 1         |
| Npm1_j6     | 0.0209767 | 0.187527  | 3.16024      | 0.0069208 | 0.065269  |
| Npm1_j7     | 0.0951304 | 0.0799779 | -0.250306    | 0.787533  | 1         |
| Kcni1_j2    | 0.55213   | 0.55298   | 0.00221901   | 0.99633   | 0.999036  |
| Kcni1_j1    | 0.981623  | 0.641796  | -0.613055    | 0.241447  | 0.588512  |
| Dock2_j8    | 9.88E-05  | 0.120211  | 10.2482      | 0.945781  | 1         |
| Ccdc99_j1   | 0         | 0.170021  | 1.79769e+308 | 0.0264408 | 0.170811  |
| Wwc1_j2     | 0.0630536 | 0.0789474 | 0.324312     | 0.826504  | 1         |
| Odz2_j11    | 0.189009  | 0.203575  | 0.107112     | 0.931499  | 0.979142  |
| Gabrg2_j3   | 2.56983   | 1.98965   | 0            | 1         | 1         |
| BC079904_j1 | 0.0745857 | 0.16671   | 1.16037      | 0.101243  | 0.394004  |
| Ttc1_j1     | 19.9658   | 19.965    | -5.91E-05    | 0.999673  | 0.999878  |
| Ublcp1_j2   | 3.53527   | 2.71456   | 0            | 1         | 1         |
| Sgcd_j1     | 0.220895  | 0.276108  | 0            | 1         | 1         |
| Sgcd_j2     | 0         | 0.286166  | 0            | 1         | 1         |
| Sgcd_j7     | 0.100743  | 0.437222  | 0            | 1         | 1         |
| Zfp879_j3   | 0.0159731 | 0.0538601 | 0            | 1         | 1         |
| Zfp2_j6     | 0.237384  | 0.16001   | -0.569066    | 0.407463  | 0.728046  |
| Zfp2_j7     | 0         | 0.396585  | 1.79769e+308 | 5.32E-05  | 0.001259  |
| Hrnnpab     | 4.54839   | 5.12744   | 0.172882     | 0.273434  | 0.622537  |
| Phf15_j5    | 0         | 0.0533653 | 1.79769e+308 | 0.0194867 | 1         |
| Ube2b_j8    | 39.3137   | 44.7895   | 0            | 1         | 1         |
| Tcf7_j1     | 0.662844  | 0.500554  | -0.405143    | 0.367386  | 0.700927  |
| Tcf7_j8     | 0.027013  | 0.0592057 | 1.13208      | 0.538144  | 1         |
| Slc22a5_j6  | 2.93239   | 2.74297   | 0            | 1         | 1         |
| Cdc42se2_j3 | 6.63131   | 6.39361   | 0            | 1         | 1         |
| Tnip1_j3    | 5.97373   | 2.99044   | -0.998275    | 1.17E-08  | 8.11E-07  |
| Anxa6_j2    | 0.666764  | 0.636429  | 0            | 1         | 1         |
| Ccdc69      | 0.154811  | 0.199189  | 0.36363      | 0.589867  | 0.836402  |
| Sparc_j1    | 10.5105   | 14.9929   | 0            | 1         | 1         |
| Atox1_j3    | 6.53097   | 15.4856   | 0            | 1         | 1         |
| AK007998_j2 | 0.154275  | 0.283237  | 0.876508     | 0.379177  | 0.710597  |
| AK007998_j3 | 0.281973  | 0.4083    | 0.534072     | 0.443524  | 0.751387  |
| Rnf187_j3   | 0.0779562 | 0.18339   | 1.23418      | 0.254483  | 0.602758  |
| Arf1_j2     | 76.8444   | 80.6676   | 0            | 1         | 1         |

|                  |           |           |              |           |           |
|------------------|-----------|-----------|--------------|-----------|-----------|
| XLOC_004871      | 0.961623  | 1.01826   | 0.082567     | 0.565281  | 0.82378   |
| Snap47_j2        | 4.24001   | 2.71048   | -0.645519    | 0.0066442 | 0.0632479 |
| Zkscan17_j5      | 0.183631  | 0.62327   | 0            | 1         | 1         |
| Plid6            | 0.0559552 | 0.13966   | 1.31957      | 0.203484  | 1         |
| Cops3_j3         | 2.39248   | 2.34834   | -0.0268614   | 0.930212  | 0.978611  |
| Flii_j1          | 0.188673  | 0.272472  | 0.530224     | 0.221674  | 0.568868  |
| Usp22_j2         | 4.6071    | 10.9585   | 0            | 1         | 1         |
| Slc47a1_j1       | 0         | 0.285179  | 1.79769e+308 | 0.0091029 | 0.0799378 |
| Slc47a1_j3       | 0.242586  | 0.151014  | -0.683816    | 0.385732  | 0.714213  |
| Slc47a1_j4       | 0         | 0.0949414 | 1.79769e+308 | 0.0094285 | 1         |
| Slc47a1_j11      | 0.0784423 | 0.0793932 | 0.0173852    | 0.989711  | 1         |
| Rnf112_j3        | 2.96578   | 0.268091  | 0            | 1         | 1         |
| Rnf112_j2        | 2.0204    | 1.32923   | 0            | 1         | 1         |
| Epn2_j2          | 8.03715   | 8.97566   | 0            | 1         | 1         |
| Epn2_j5          | 0.862905  | 1.30323   | 0            | 1         | 1         |
| Prpsap2_j2       | 0.322324  | 0.372943  | 0.210445     | 0.572242  | 0.827134  |
| Prpsap2_j4       | 0.123323  | 0.180598  | 0.550347     | 0.24389   | 0.591133  |
| Prpsap2_j6       | 0.159981  | 0.063522  | -1.33257     | 0.315103  | 0.659071  |
| Prpsap2_j9       | 0.0320283 | 0.263132  | 3.03837      | 0.310909  | 0.655674  |
| Ncor1_j11        | 0.165416  | 0.39214   | 0            | 1         | 1         |
| Zfp286_j4        | 0.540006  | 0.829868  | 0.619907     | 0.0585008 | 0.284131  |
| Arhgap44_j1      | 0         | 0.299809  | 0            | 1         | 1         |
| Map2k4_j2        | 7.53129   | 9.3272    | 0            | 1         | 1         |
| Dnahc9_j4        | 0.0467286 | 0.100602  | 1.10628      | 0.289525  | 1         |
| 2310004I24Rik_j4 | 0.775171  | 0.263463  | 0            | 1         | 1         |
| Wdr16_j1         | 0.0221691 | 0.0503249 | 1.18272      | 0.485614  | 1         |
| Pfas_j4          | 0.0561326 | 0.106638  | 0            | 1         | 1         |
| Cntrob_j3        | 0.111857  | 0.153204  | 0.453802     | 0.618946  | 1         |
| Cntrob_j4        | 0.0722885 | 0.0740197 | 0.0341427    | 0.9601    | 1         |
| Chd3_j9          | 3.5645    | 4.06946   | 0            | 1         | 1         |
| Cyb5d1_j1        | 0.381893  | 0.262565  | 0            | 1         | 1         |
| Cyb5d1_j2        | 3.79079   | 2.99049   | 0            | 1         | 1         |
| Kdm6b_j6         | 0.557838  | 0.82752   | 0            | 1         | 1         |
| Efnb3_j1         | 0.132894  | 0.517748  | 1.96198      | 0.0004444 | 0.0073751 |
| Eif4a1_j4        | 0.260355  | 0.660218  | 0            | 1         | 1         |
| Polr2a_j1        | 12.6257   | 11.6764   | 0            | 1         | 1         |
| Nlgn2_j1         | 7.92373   | 6.7699    | -0.227046    | 0.0562001 | 0.277404  |
| Tnk1_j2          | 1.58448   | 2.35033   | 0            | 1         | 1         |
| 2810408A11Rik    | 0.0807221 | 0.0608278 | -0.408233    | 0.756252  | 1         |
| Slc2a4           | 0.0473076 | 0.139581  | 1.56096      | 0.222897  | 1         |
| Rai12_j2         | 32.8562   | 38.6644   | 0.234843     | 0.0227718 | 0.154096  |
| Slc16a13_j2      | 0.0999942 | 0.0852856 | -0.229543    | 0.772524  | 1         |
| 0610010K14Rik_j1 | 10.2562   | 13.3186   | 0.376957     | 0.0100049 | 0.0855915 |
| Alox12_j2        | 0.127968  | 0.342481  | 1.42024      | 0.0914806 | 0.371729  |
| Cxcl16_j2        | 0.0467096 | 0.578894  | 3.63151      | 6.78E-08  | 3.87E-06  |
| Cxcl16_j3        | 0.199286  | 0.252096  | 0.339132     | 0.271173  | 0.620126  |
| Camta2_j6        | 0.179138  | 0.0884664 | 0            | 1         | 1         |

|                  |             |           |              |           |          |
|------------------|-------------|-----------|--------------|-----------|----------|
| A430084P05Rik_j1 | 0.000352425 | 0.121155  | 8.42532      | 0.915471  | 1        |
| Dhx33_j1         | 0.838986    | 1.20017   | 0            | 1         | 1        |
| Dhx33_j2         | 0.661371    | 0.88677   | 0            | 1         | 1        |
| Dhx33_j3         | 0.476608    | 0.203228  | 0            | 1         | 1        |
| Derl2_j1         | 0.0579759   | 0.228387  | 0            | 1         | 1        |
| 6330403K07Rik_j1 | 40.0044     | 36.9902   | 0            | 1         | 1        |
| Pitpnm3_j4       | 0.130652    | 0.22814   | 0.804197     | 0.11403   | 0.419996 |
| Pitpnm3_j1       | 0           | 0.0506761 | 1.79769e+308 | 0.0267863 | 1        |
| Pitpnm3_j2       | 0           | 0.114508  | 1.79769e+308 | 0.0006231 | 1        |
| Kiaa0753_j1      | 0.074047    | 0.080333  | 0.117551     | 0.845782  | 1        |
| Smtnl2_j1        | 0.672232    | 0.430226  | -0.643864    | 0.135536  | 0.458045 |
| Spns3_j3         | 0.0383594   | 0.172533  | 2.16922      | 0.114324  | 0.420826 |
| Spns3_j4         | 0.0364674   | 0.120635  | 1.72597      | 0.335935  | 1        |
| Tmem93_j1        | 7.56934     | 7.74627   | 0            | 1         | 1        |
| mKIAA1039_j7     | 0           | 0.432518  | 0            | 1         | 1        |
| Pafah1b1_j5      | 0.505133    | 0.406886  | 0            | 1         | 1        |
| Pafah1b1_j6      | 0.426074    | 0.32004   | 0            | 1         | 1        |
| Sgsm2_j3         | 3.96034     | 4.40467   | 0            | 1         | 1        |
| Srr_j3           | 0.0885106   | 0.0586573 | 0            | 1         | 1        |
| Wdr81_j2         | 0.191265    | 0.528926  | 1.46749      | 0.0150837 | 0.115367 |
| Nxn_j1           | 1.50251     | 2.52498   | 0            | 1         | 1        |
| Abr_j3           | 4.93579     | 2.10971   | 0            | 1         | 1        |
| Abr              | 1.33833     | 2.21928   | 0            | 1         | 1        |
| Abr_j2           | 14.7409     | 4.70434   | 0            | 1         | 1        |
| Efcab5_j2        | 0.0490495   | 0.0612423 | 0.32029      | 0.856131  | 1        |
| Taok1            | 1.69252     | 0.557181  | 0            | 1         | 1        |
| Taok1_j1         | 2.71119     | 2.49472   | 0            | 1         | 1        |
| Pipox_j2         | 0.000126406 | 0.112393  | 9.79627      | 0.957818  | 1        |
| Pipox_j3         | 0           | 0.0596736 | 1.79769e+308 | 0.0865092 | 1        |
| Supt6h_j3        | 19.9377     | 24.2437   | 0            | 1         | 1        |
| Nlk_j2           | 4.65071     | 4.51217   | -0.0436311   | 0.826522  | 0.944076 |
| Lgals9_j1        | 13.5707     | 15.6686   | 0            | 1         | 1        |
| Ksr1_j19         | 2.43144     | 2.0916    | -0.217209    | 0.497596  | 0.783786 |
| 5730455P16Rik_j2 | 3.45742     | 4.57743   | 0            | 1         | 1        |
| Myo1d_j4         | 5.15956     | 5.27634   | 0            | 1         | 1        |
| Accn1_j2         | 2.37633     | 1.83471   | -0.373187    | 0.280059  | 0.62888  |
| Cct6b_j6         | 0.052933    | 0.0810438 | 0.614534     | 0.572106  | 1        |
| Nle1_j3          | 0.378886    | 0.410396  | 0.115255     | 0.709707  | 0.894313 |
| Slfn9_j1         | 0.184877    | 1.0129    | 0            | 1         | 1        |
| Slfn8_j1         | 0.0172654   | 0.214022  | 0            | 1         | 1        |
| Mmp28_j6         | 0.125589    | 0.0051507 | 0            | 1         | 1        |
| Mmp28_j5         | 0           | 0.313948  | 0            | 1         | 1        |
| Mmp28_j4         | 0           | 0.0528375 | 0            | 1         | 1        |
| Ccl3             | 0.0614893   | 0.32651   | 2.40872      | 0.0228083 | 0.154258 |
| Gm12576_j1       | 0.645381    | 0.776538  | 0.266905     | 0.540936  | 0.809112 |
| Tada2a_j1        | 0.36305     | 0.505866  | 0            | 1         | 1        |
| Dhrs11_j2        | 1.05004     | 0.748451  | -0.488457    | 0.328853  | 0.67119  |

|            |             |           |              |           |           |
|------------|-------------|-----------|--------------|-----------|-----------|
| Ggnbp2_j8  | 21.3599     | 24.0208   | 0.169381     | 0.0868396 | 0.36018   |
| Usp32_j6   | 1.95178     | 2.37461   | 0            | 1         | 1         |
| Ints2      | 6.89E-05    | 0.877972  | 13.6371      | 0.656376  | 0.868897  |
| Rps6kb1_j1 | 4.20884     | 3.79123   | 0            | 1         | 1         |
| Rps6kb1_j2 | 1.68195     | 0.992314  | 0            | 1         | 1         |
| Dgke_j1    | 2.5919      | 2.79241   | 0            | 1         | 1         |
| Hlf_j2     | 0.433866    | 0.569448  | 0.392313     | 0.197     | 0.539845  |
| Utp18_j1   | 2.53408     | 3.05793   | 0.271089     | 0.266167  | 0.615308  |
| Luc7l3_j4  | 2.6953      | 2.90676   | 0            | 1         | 1         |
| Abcc3_j6   | 0           | 0.0469481 | 1.79769e+308 | 0.030017  | 1         |
| Abcc3_j5   | 0.072068    | 0.120794  | 0.745119     | 0.252792  | 1         |
| Epn3_j2    | 0.00103861  | 0.195997  | 0            | 1         | 1         |
| Mycbpap_j1 | 0.235352    | 0.221718  | 0            | 1         | 1         |
| Rsad1_j4   | 0           | 0.696712  | 0            | 1         | 1         |
| Rsad1_j5   | 1.0061      | 0.504905  | 0            | 1         | 1         |
| Rsad1_j6   | 0.000443045 | 0.150586  | 0            | 1         | 1         |
| Rsad1_j7   | 0.144729    | 0.427026  | 0            | 1         | 1         |
| Eme1_j1    | 6.12663     | 6.08799   | -0.00912708  | 0.950751  | 0.985809  |
| Xylt2_j4   | 7.27981     | 5.82339   | -0.322042    | 0.02666   | 0.171773  |
| Itga3_j5   | 2.82588     | 3.58948   | 0.345073     | 0.11899   | 0.42917   |
| Myst2_j4   | 0.334041    | 0.1091    | 0            | 1         | 1         |
| Myst2_j5   | 0.206052    | 0.170485  | 0            | 1         | 1         |
| Ube2z_j1   | 15.194      | 17.2707   | 0            | 1         | 1         |
| Snx11_j5   | 0.419315    | 0.472219  | 0            | 1         | 1         |
| Nfe2l1_j3  | 30.7835     | 21.6858   | 0            | 1         | 1         |
| Tbkbp1_j8  | 1.35569     | 1.58559   | 0            | 1         | 1         |
| Kpnb1_j2   | 31.0141     | 34.0055   | 0            | 1         | 1         |
| Npepps_j3  | 3.95695     | 3.64506   | 0            | 1         | 1         |
| Srcin1_j16 | 0.55806     | 0.504779  | 0            | 1         | 1         |
| Srcin1_j17 | 2.51584     | 3.06787   | 0            | 1         | 1         |
| Srcin1_j19 | 0.278014    | 0.562427  | 0            | 1         | 1         |
| Srcin1_j18 | 0.000290573 | 0.465696  | 0            | 1         | 1         |
| Pcgf2_j8   | 2.46124     | 2.60843   | 0.0837944    | 0.771186  | 0.922277  |
| Rpl23_j6   | 0.365046    | 0.685149  | 0.90834      | 0.152403  | 0.484061  |
| Rpl23_j8   | 0.152659    | 0.293495  | 0.943017     | 0.297772  | 0.644376  |
| Rpl23_j12  | 0.321426    | 0.393462  | 0.291734     | 0.496186  | 0.783139  |
| Plxdc1_j1  | 0.0537127   | 0.0425867 | -0.33486     | 0.815655  | 1         |
| Arl5c      | 0           | 0.075612  | 1.79769e+308 | 0.143457  | 1         |
| Stac2_j2   | 0           | 0.199331  | 1.79769e+308 | 0.0197597 | 0.139688  |
| Med1_j6    | 1.83864     | 2.05841   | 0            | 1         | 1         |
| Med1_j5    | 0.00505912  | 0.353108  | 0            | 1         | 1         |
| Med1_j4    | 0           | 0.0620575 | 0            | 1         | 1         |
| Smarce1_j3 | 0.143948    | 0.367902  | 0            | 1         | 1         |
| Krt27_j3   | 0.478488    | 0.496234  | 0.0525402    | 0.942     | 0.982346  |
| Jup_j3     | 0.436004    | 0.866825  | 0            | 1         | 1         |
| Acly_j5    | 0.5842      | 0.64257   | 0            | 1         | 1         |
| Dnajc7_j9  | 49.7329     | 60.605    | 0.285238     | 0.0025958 | 0.0307386 |

|                   |           |                        |           |           |           |
|-------------------|-----------|------------------------|-----------|-----------|-----------|
| Kcnh4_j1          | 0.0302384 | 0.146464               | 2.27609   | 0.136464  | 1         |
| Stat3_j4          | 8.82291   | 12.2715                | 0         | 1         | 1         |
| Ezh1              | 12.609    | 12.1511                | 0         | 1         | 1         |
| 1700113I22Rik_j3  | 0         | 0.08002 1.79769e+308   |           | 0.105229  | 1         |
| Atxn7I3_j7        | 8.82997   | 8.20048                | 0         | 1         | 1         |
| Atxn7I3           | 5.87213   | 7.17705                | 0         | 1         | 1         |
| Ubtf_j1           | 0.216531  | 0.36527                | 0         | 1         | 1         |
| Ubtf_j4           | 0         | 0.258427               | 0         | 1         | 1         |
| Slc25a39_j1       | 6.22273   | 5.55082                | 0         | 1         | 1         |
| Itga2b_j4         | 0.134607  | 0.749291               | 2.47678   | 9.89E-06  | 0.0003071 |
| Gjc1_j1           | 0         | 0.0499848 1.79769e+308 |           | 0.0721392 | 1         |
| Eftud2_j4         | 9.5401    | 10.6506                | 0         | 1         | 1         |
| Arhgap27_j5       | 1.29991   | 1.21606                | 0         | 1         | 1         |
| Gosr2_j3          | 14.5734   | 17.4461                | 0         | 1         | 1         |
| 1700081L11Rik_j9  | 5.77203   | 5.11785                | 0         | 1         | 1         |
| 1700081L11Rik_j10 | 0         | 0.434793               | 0         | 1         | 1         |
| Cyb561_j2         | 9.3348    | 13.7427                | 0         | 1         | 1         |
| Ddx5_j9           | 3.58123   | 3.98731                | 0         | 1         | 1         |
| Ddx5_j10          | 0.975446  | 0.982623               | 0         | 1         | 1         |
| Bptf_j3           | 0.018633  | 0.0613558              | 1.71934   | 0.0194757 | 1         |
| Pitpnc1_j5        | 4.52589   | 8.60597                | 0         | 1         | 1         |
| Cacng4_j1         | 0.304076  | 0.553857               | 0.865082  | 0.0329802 | 0.197894  |
| Abca8a_j1         | 7.9145    | 12.2766                | 0         | 1         | 1         |
| XLOC_005302       | 0.0940587 | 0.197973               | 1.07367   | 0.0806967 | 0.345796  |
| Sdk2_j6           | 0.805739  | 1.01443                | 0.33228   | 0.132906  | 0.453791  |
| AF251705_j1       | 0.767282  | 1.47466                | 0.942549  | 0.0168636 | 0.125056  |
| Cd300lh_j1        | 0.210881  | 0.59093                | 1.48656   | 0.0214455 | 0.147768  |
| Cd300lh_j2        | 0.159096  | 0.36203                | 1.18621   | 0.13144   | 0.451337  |
| Fdxr_j3           | 4.16796   | 4.05543                | 0         | 1         | 1         |
| C630004H02Rik_j3  | 12.2813   | 13.7012                | 0         | 1         | 1         |
| Hn1_j1            | 0.294088  | 0.20903                | -0.492537 | 0.599675  | 0.841292  |
| Sumo2_j2          | 0.179577  | 0.10503                | -0.773801 | 0.432478  | 0.744252  |
| Gga3_j1           | 16.667    | 18.6928                | 0         | 1         | 1         |
| Grb2_j4           | 0.947721  | 2.12666                | 0         | 1         | 1         |
| Grb2_j6           | 0         | 0.385803               | 0         | 1         | 1         |
| H3f3b_j1          | 13.5792   | 19.446                 | 0.518075  | 0.0014957 | 0.0196989 |
| H3f3b_j2          | 4.54147   | 5.33754                | 0.233013  | 0.170177  | 0.507195  |
| Unc13d_j8         | 0.0466442 | 0.0411716              | -0.180047 | 0.901249  | 1         |
| Wbp2_j4           | 11.0918   | 4.34929                | 0         | 1         | 1         |
| Wbp2_j5           | 21.4377   | 19.7358                | 0         | 1         | 1         |
| Fbf1_j15          | 0.224346  | 0.405176               | 0         | 1         | 1         |
| Fbf1_j16          | 0.46435   | 0.661333               | 0         | 1         | 1         |
| Exoc7_j5          | 6.56439   | 6.98709                | 0         | 1         | 1         |
| Exoc7_j4          | 10.6032   | 9.09076                | 0         | 1         | 1         |
| Rnf157_j8         | 0.305668  | 0.162601               | 0         | 1         | 1         |
| Prpsap1_j2        | 0.558368  | 0.528305               | 0         | 1         | 1         |
| St6galnac2_j3     | 0.171444  | 0.146628               | -0.225576 | 0.790426  | 0.930178  |

|                  |             |           |               |           |           |
|------------------|-------------|-----------|---------------|-----------|-----------|
| Jmjd6_j1         | 1.45517     | 2.26763   | 0.639996      | 0.0078646 | 0.0716596 |
| Jmjd6            | 4.17794     | 4.45787   | 0.0935641     | 0.57444   | 0.828005  |
| Tmc6_j1          | 4.38655     | 5.35366   | 0             | 1         | 1         |
| Tha1             | 0.298507    | 0.446022  | 0.579348      | 0.326007  | 0.669299  |
| Dnahc17_j1       | 0           | 0.226426  | 1.79769e+308  | 0.0388713 | 0.219867  |
| XLOC_005363      | 0           | 0.066039  | 1.79769e+308  | 0.207341  | 1         |
| Cyth1_j3         | 1.41021     | 1.49819   | 0             | 1         | 1         |
| Usp36_j7         | 3.14687     | 3.41738   | 0             | 1         | 1         |
| Usp36_j8         | 0.0444267   | 0.17869   | 0             | 1         | 1         |
| Timp2_j4         | 3.49197     | 15.1942   | 0             | 1         | 1         |
| Cant1_j2         | 0.609366    | 0.726286  | 0             | 1         | 1         |
| XLOC_005382      | 0.00534703  | 0.145202  | 4.76318       | 0.243546  | 1         |
| Aatk_j1          | 6.08537     | 3.91615   | 0             | 1         | 1         |
| Pde6g_j1         | 0.347537    | 0.241097  | -0.527557     | 0.435059  | 0.745948  |
| Arl16_j1         | 5.96729     | 7.12018   | 0.254838      | 0.0357446 | 0.20852   |
| Sirt7_j6         | 0.167312    | 0.222004  | 0             | 1         | 1         |
| Sirt7_j8         | 2.05139     | 2.06899   | 0             | 1         | 1         |
| Sirt7_j9         | 0.198034    | 0.156675  | 0             | 1         | 1         |
| Dcxr_j2          | 0.609586    | 0.822166  | 0.4316        | 0.292292  | 0.639162  |
| Rfng_j1          | 11.8941     | 12.0506   | 0             | 1         | 1         |
| Fasn_j1          | 11.9901     | 14.552    | 0.279377      | 0.0023796 | 0.028702  |
| Ccdc57_j2        | 0           | 0.0518129 | 1.79769e+308  | 0.0857115 | 1         |
| Csnk1d_j1        | 0           | 0.374125  | 0             | 1         | 1         |
| Sectm1a_j1       | 0.00950451  | 0.0643165 | 2.7585        | 0.307289  | 1         |
| 1110031I02Rik_j1 | 2.43604     | 2.68591   | 0             | 1         | 1         |
| BC017643_j2      | 1.79433     | 1.79667   | 0             | 1         | 1         |
| BC017643_j3      | 1.8256      | 2.2053    | 0             | 1         | 1         |
| Pisd-ps1_j7      | 0.41137     | 0.566472  | 0             | 1         | 1         |
| Morc2a_j3        | 0.0753475   | 0         | -1.79769e+308 | 0.0002541 | 1         |
| Dusp18_j1        | 0.341314    | 0.499779  | 0.55019       | 0.122998  | 0.436594  |
| Pes1_j3          | 0           | 0.114157  | 1.79769e+308  | 0.0034118 | 1         |
| Gatsl3_j3        | 0.000243229 | 0.358511  | 10.5255       | 0.848308  | 0.952075  |
| Ascc2_j5         | 0           | 0.301818  | 0             | 1         | 1         |
| Ogdh_j5          | 17.7096     | 19.4576   | 0             | 1         | 1         |
| Zmiz2_j9         | 0.687467    | 0.409537  | 0             | 1         | 1         |
| XLOC_003926      | 0.198528    | 0.214091  | 0.108882      | 0.873478  | 0.959888  |
| XLOC_003926      | 0.0573519   | 0.0856743 | 0.579021      | 0.650142  | 1         |
| Gm11992_j2       | 0           | 0.160206  | 1.79769e+308  | 0.0137385 | 0.108008  |
| Vwc2_j1          | 0.128234    | 0.19763   | 0.624022      | 0.362025  | 0.696369  |
| Egfr             | 0.109553    | 0.417137  | 1.92889       | 9.83E-05  | 0.0021222 |
| Egfr_j2          | 0.0737819   | 0.452875  | 2.61777       | 1.63E-06  | 6.29E-05  |
| Cnrip1           | 26.9512     | 27.4043   | 0             | 1         | 1         |
| Cct4_j2          | 6.00717     | 6.24704   | 0             | 1         | 1         |
| Cct4_j3          | 13.2826     | 17.6805   | 0             | 1         | 1         |
| Fam161a_j10      | 0           | 0.22717   | 1.79769e+308  | 0.003317  | 0.0373028 |
| Xpo1_j4          | 1.49729     | 1.53468   | 0             | 1         | 1         |
| Pus10_j2         | 0.218865    | 0.114298  | 0             | 1         | 1         |

|              |           |           |              |           |           |
|--------------|-----------|-----------|--------------|-----------|-----------|
| Fandl_j3     | 0.111373  | 0.43105   | 1.95245      | 0.0764183 | 0.334017  |
| Pnpt1_j3     | 3.5678    | 3.74525   | 0            | 1         | 1         |
| Asb3_j3      | 1.26525   | 1.28859   | 0.0263804    | 0.891351  | 0.965687  |
| Hba-a2_j1    | 37.662    | 54.0063   | 0            | 1         | 1         |
| Hba-a2_j2    | 2.44961   | 1.83456   | 0            | 1         | 1         |
| XLOC_003991  | 0.196681  | 0.267707  | 0            | 1         | 1         |
| XLOC_003992  | 0.384165  | 0.804091  | 1.06563      | 0.327642  | 0.670398  |
| XLOC_003992  | 0.023044  | 0.0922025 | 2.00042      | 0.25056   | 1         |
| Pwwp2a_j3    | 0.828651  | 1.12185   | 0.437037     | 0.129434  | 0.448367  |
| Ebf4_j7      | 1.32335   | 0.697598  | 0            | 1         | 1         |
| Adam19_j1    | 0         | 0.173463  | 1.79769e+308 | 9.03E-05  | 0.0019671 |
| Med7         | 6.23023   | 4.84467   | -0.362886    | 0.342158  | 0.681895  |
| Olfr56_j2    | 1.20759   | 0.51221   | -1.23733     | 0.0229052 | 0.154736  |
| Zfp62        | 0.018978  | 0.800643  | 0            | 1         | 1         |
| Flt4_j2      | 0         | 0.0864365 | 1.79769e+308 | 0.0478905 | 1         |
| Flt4_j3      | 0         | 0.087851  | 1.79769e+308 | 0.0349383 | 1         |
| Gfpt2_j1     | 0         | 0.170142  | 1.79769e+308 | 0.0033201 | 0.0373291 |
| Rasgef1c_j1  | 0.197296  | 0.17468   | -0.175646    | 0.821294  | 0.942238  |
| XLOC_004034  | 0.401102  | 0.597068  | 0.573927     | 0.468642  | 0.767193  |
| Hnrnph1_j1   | 0         | 0.0503173 | 1.79769e+308 | 0.102799  | 1         |
| Adamts2_j3   | 0.84064   | 0.710052  | -0.243563    | 0.315427  | 0.659421  |
| Adamts2_j5   | 0.642906  | 0.710417  | 0.144057     | 0.616224  | 0.848764  |
| Clk4_j4      | 0.995976  | 0.785859  | 0            | 1         | 1         |
| Col23a1_j1   | 0         | 0.272039  | 1.79769e+308 | 0.053779  | 0.270192  |
| Col23a1_j2   | 2.25347   | 2.22164   | -0.0205255   | 0.877574  | 0.96086   |
| Cdkl3_j2     | 0.0990891 | 0.176107  | 0.829654     | 0.344374  | 0.684046  |
| Cdkl3_j4     | 0.316861  | 0.432936  | 0.450305     | 0.356292  | 0.692255  |
| Cdkl3_j3     | 0.708138  | 0.884015  | 0.320039     | 0.28195   | 0.630468  |
| Skp1a_j3     | 1.96875   | 2.87095   | 0            | 1         | 1         |
| Vdac1_j1     | 7.35373   | 18.846    | 0            | 1         | 1         |
| Gdf9         | 0.0217431 | 0.0951562 | 2.12974      | 0.172068  | 1         |
| Sept8_j4     | 1.77835   | 2.64329   | 0.571795     | 0.0177964 | 0.129898  |
| Kif3a_j1     | 5.77556   | 6.70643   | 0            | 1         | 1         |
| Kif3a_j3     | 3.39852   | 7.67663   | 0            | 1         | 1         |
| Irf1_j1      | 0         | 0.257186  | 1.79769e+308 | 0.0054305 | 0.0540236 |
| XLOC_004063  | 0.190197  | 0.214353  | 0.172492     | 0.659507  | 0.870733  |
| Fnip1_j6     | 1.61315   | 1.83601   | 0.1867       | 0.419952  | 0.73648   |
| Rapgef6_j3   | 3.28961   | 2.95271   | 0            | 1         | 1         |
| Rapgef6_j2   | 0.484728  | 0.354085  | 0            | 1         | 1         |
| Rapgef6_j5   | 0.676277  | 0.446315  | 0            | 1         | 1         |
| Slc36a1_j1   | 0         | 0.0909802 | 0            | 1         | 1         |
| G3bp1_j7     | 1.53304   | 1.69818   | 0            | 1         | 1         |
| Gria1_j2     | 0.264701  | 0.418219  | 0            | 1         | 1         |
| Gria1_j1     | 1.00393   | 1.46478   | 0            | 1         | 1         |
| Galnt10_j1   | 1.02284   | 1.29184   | 0            | 1         | 1         |
| Larp1_j1     | 0.447089  | 0.16839   | 0            | 1         | 1         |
| Zfp692-ps_j7 | 0.975111  | 1.17614   | 0.270426     | 0.299555  | 0.646333  |

|                   |             |           |              |           |           |
|-------------------|-------------|-----------|--------------|-----------|-----------|
| 2310033P09Rik_j2  | 4.6572      | 4.99413   | 0            | 1         | 1         |
| 2310033P09Rik_j1  | 4.25032     | 4.28188   | 0            | 1         | 1         |
| Mprip_j9          | 3.94083     | 4.71462   | 0            | 1         | 1         |
| XLOC_004102       | 0.0838806   | 0.108986  | 0.37774      | 0.612292  | 1         |
| Med9_j1           | 14.1033     | 14.2325   | 0            | 1         | 1         |
| Rai1_j2           | 1.09054     | 1.20446   | 0.143339     | 0.350151  | 0.687728  |
| Myo15_j4          | 0.0528812   | 0.110767  | 1.06671      | 0.297227  | 1         |
| Myo15_j10         | 0.0955212   | 0.148419  | 0.63578      | 0.451967  | 1         |
| Myo15_j12         | 0           | 0.0911007 | 1.79769e+308 | 0.0422193 | 1         |
| Smcr7_j2          | 3.95959     | 4.13983   | 0            | 1         | 1         |
| Smcr7_j3          | 1.74616     | 1.92992   | 0            | 1         | 1         |
| Dhrs7b_j3         | 2.76666     | 4.73471   | 0.775133     | 0.0194946 | 0.138477  |
| B9d1_j3           | 0.00040321  | 0.354841  | 9.78142      | 0.902759  | 0.968976  |
| B9d1_j5           | 0.51741     | 0.918071  | 0.827296     | 0.230026  | 0.577072  |
| Specc1_j3         | 0           | 0.0738587 | 0            | 1         | 1         |
| Specc1_j4         | 0.624908    | 0.416364  | 0            | 1         | 1         |
| Specc1_j6         | 0.000645603 | 0.458528  | 0            | 1         | 1         |
| Fbxw10_j5         | 0           | 0.230502  | 1.79769e+308 | 0.001521  | 0.0199504 |
| Hs3st3a1          | 0.0379795   | 0.135986  | 1.84016      | 0.179701  | 1         |
| Pirt_j5           | 0.591659    | 0.262275  | 0            | 1         | 1         |
| Tmem220_j2        | 0.268841    | 0.395109  | 0.555497     | 1         | 1         |
| Gas7_j3           | 0.0937474   | 9.95E-05  | 0            | 1         | 1         |
| Myh10_j1          | 3.42093     | 2.67475   | 0            | 1         | 1         |
| Myh10_j9          | 11.8877     | 10.681    | 0            | 1         | 1         |
| Rpl26_j4          | 0.435339    | 0.411208  | -0.0822733   | 0.922901  | 0.975936  |
| 1500010J02Rik_j1  | 0           | 0.132215  | 0            | 1         | 1         |
| 1500010J02Rik_j11 | 0           | 0.0727634 | 0            | 1         | 1         |
| Trp53_j5          | 0.70693     | 0.598549  | -0.240099    | 0.632892  | 0.857331  |
| Trp53_j6          | 0.0127609   | 0.0942842 | 2.88528      | 0.326404  | 1         |
| Neurl4_j7         | 1.70818     | 2.49501   | 0.546585     | 0.0835214 | 0.352312  |
| Ybx2_j3           | 0.198234    | 0.117303  | -0.756961    | 0.568369  | 0.825515  |
| Phf23_j5          | 0           | 0.292487  | 1.79769e+308 | 0.0188784 | 0.135521  |
| Arrb2_j2          | 6.12562     | 6.69863   | 0            | 1         | 1         |
| Med11_j2          | 10.7966     | 12.8844   | 0.25504      | 0.198698  | 0.541904  |
| Psmb6_j2          | 21.3485     | 25.3292   | 0.246671     | 0.169349  | 0.506271  |
| Pld2_j7           | 0           | 0.0710045 | 1.79769e+308 | 0.0373043 | 1         |
| Pld2_j6           | 0.206465    | 0.0379143 | -2.44509     | 0.0354486 | 0.207411  |
| Pld2_j13          | 0.107556    | 0.341423  | 1.66647      | 0.0912417 | 0.371241  |
| Kif1c_j5          | 0.0792299   | 0.725803  | 0            | 1         | 1         |
| Kif1c_j6          | 0.546735    | 1.00714   | 0            | 1         | 1         |
| Rabep1_j4         | 5.2603      | 6.52819   | 0            | 1         | 1         |
| Mybbp1a_j3        | 0.53056     | 0.552593  | 0            | 1         | 1         |
| Ube2g1_j3         | 0.455695    | 0.673797  | 0            | 1         | 1         |
| Zzef1_j2          | 1.96097     | 3.0655    | 0.644554     | 0.0012765 | 0.0173846 |
| Zzef1_j3          | 11.4757     | 12.1549   | 0.0829608    | 0.472576  | 0.769633  |
| Atp2a3_j5         | 0.28409     | 0.673659  | 1.24567      | 1         | 1         |
| Camkk1_j4         | 4.55126     | 4.61605   | 0            | 1         | 1         |



|                  |           |           |              |           |           |
|------------------|-----------|-----------|--------------|-----------|-----------|
| Itgae_j5         | 0         | 0.209046  | 1.79769e+308 | 0.0611071 | 0.291681  |
| Itgae_j6         | 0.345744  | 0.278398  | -0.312557    | 0.793184  | 0.93108   |
| Tax1bp3_j1       | 0.475354  | 0.616443  | 0            | 1         | 1         |
| Shpk_j4          | 2.78911   | 3.38131   | 0            | 1         | 1         |
| Trpv1_j1         | 0.0267298 | 0.111645  | 2.06239      | 0.127795  | 1         |
| Trpv1_j4         | 0.34665   | 0.290135  | -0.256756    | 0.6376    | 0.859668  |
| Trpv1_j5         | 9.61227   | 14.3554   | 0.578642     | 0.0006827 | 0.0105092 |
| 1300001I01Rik_j7 | 10.1231   | 10.4796   | 0.0499312    | 0.644755  | 0.863009  |
| 1300001I01Rik_j8 | 0         | 0.0587635 | 1.79769e+308 | 0.0469752 | 1         |
| Mnt_j2           | 1.46272   | 2.6167    | 0            | 1         | 1         |
| Rtn4rl1_j2       | 0         | 2.90201   | 0            | 1         | 1         |
| Prpf8_j2         | 0.16895   | 1.63794   | 0            | 1         | 1         |
| Scarf1_j2        | 0.215553  | 0.259541  | 0.267921     | 0.489813  | 0.779571  |
| Myo1c_j5         | 0.0645424 | 0.116533  | 0            | 1         | 1         |
| Crk_j1           | 33.9882   | 36.4713   | 0            | 1         | 1         |
| XLOC_004252      | 0         | 0.288615  | 1.79769e+308 | 0.0033115 | 0.0372671 |
| Git1_j5          | 27.8928   | 32.5702   | 0.223662     | 0.0129346 | 0.103684  |
| Abhd15_j1        | 7.45E-05  | 0.0661743 | 9.79525      | 0.879303  | 1         |
| XLOC_004263      | 0         | 0.152634  | 1.79769e+308 | 0.0858925 | 1         |
| Phf12_j2         | 0.312199  | 0.657306  | 0            | 1         | 1         |
| Flot2_j6         | 1.7094    | 1.32721   | 0            | 1         | 1         |
| Flot2_j5         | 1.62597   | 1.70964   | 0            | 1         | 1         |
| Flot2_j9         | 0.05601   | 0.365574  | 0            | 1         | 1         |
| BC017647         | 12.9767   | 11.2956   | -0.200163    | 0.0511446 | 0.262009  |
| Proca1_j2        | 0.0371443 | 0.110875  | 1.57773      | 0.292124  | 1         |
| 2610507B11Rik_j4 | 0         | 0.144087  | 0            | 1         | 1         |
| Spag5_j4         | 0         | 0.0598242 | 1.79769e+308 | 0.0618921 | 1         |
| Ift20_j1         | 26.0025   | 26.0616   | 0            | 1         | 1         |
| 1810012P15Rik_j1 | 3.84525   | 3.43222   | 0            | 1         | 1         |
| 1810012P15Rik_j2 | 1.36744   | 1.51086   | 0            | 1         | 1         |
| Atad5_j6         | 0.496016  | 0.528458  | 0.0914031    | 0.803232  | 0.934684  |
| Rhot1_j3         | 0.0679571 | 0.0548731 | -0.308526    | 0.781789  | 1         |
| Rhot1_j4         | 0.96233   | 1.02085   | 0.0851641    | 0.76772   | 0.920844  |
| Rhot1_j8         | 10.5386   | 11.2894   | 0.0992771    | 0.564631  | 0.823408  |
| Cdk5r1_j1        | 0         | 0.592369  | 0            | 1         | 1         |
| Lig3_j2          | 1.9926    | 1.73923   | -0.196206    | 0.347652  | 0.686248  |
| Unc45b_j1        | 0         | 0.165805  | 1.79769e+308 | 0.0018394 | 0.0233786 |
| Sln5_j5          | 0         | 0.127121  | 1.79769e+308 | 0.0013992 | 1         |
| Sln5_j7          | 0         | 0.0645377 | 1.79769e+308 | 0.0235493 | 1         |
| Sln5             | 0         | 0.159063  | 1.79769e+308 | 0.0003272 | 0.005739  |
| Al662270_j1      | 0         | 0.322897  | 1.79769e+308 | 0.0046692 | 0.048196  |
| Gm11427          | 0.0887035 | 0.128198  | 0.53131      | 0.500847  | 1         |
| AA465934_j1      | 0         | 0.0541899 | 1.79769e+308 | 0.176574  | 1         |
| Rasl10b_j6       | 1.53017   | 1.86671   | 0            | 1         | 1         |
| Taf15_j1         | 0         | 0.640745  | 1.79769e+308 | 0.000108  | 0.0022976 |
| Taf15_j9         | 0.360024  | 1.43681   | 1.9967       | 0.005519  | 0.0546947 |
| Synrg_j1         | 8.17267   | 6.54503   | 0            | 1         | 1         |

|                  |           |                        |            |           |           |
|------------------|-----------|------------------------|------------|-----------|-----------|
| Acaca_j4         | 0.150666  | 0.133825               | -0.171001  | 0.865337  | 0.957067  |
| Acaca_j11        | 0         | 0.115884 1.79769e+308  |            | 0.250914  | 1         |
| Acaca_j15        | 0.482759  | 0.519774               | 0.106581   | 0.834742  | 0.946943  |
| Acaca_j18        | 0         | 0.0601861 1.79769e+308 |            | 0.154298  | 1         |
| XLOC_004337      | 0.159251  | 0.147654               | -0.109087  | 0.874016  | 0.959954  |
| Ppm1d            | 0.0845856 | 0.126722               | 0.583186   | 0.50055   | 1         |
| Bcas3_j7         | 6.38303   | 6.57698                | 0          | 1         | 1         |
| Tubd1_j5         | 0.522591  | 0.756412               | 0.533491   | 0.196533  | 0.539312  |
| Tex14_j2         | 4.81E-05  | 0.0878474              | 10.8346    | 0.968928  | 1         |
| Tex14_j6         | 0         | 0.192415 1.79769e+308  |            | 0.0517344 | 0.263782  |
| Sept4            | 6.65145   | 4.29478                | -0.631085  | 0.0024333 | 0.0292053 |
| Mtmr4_j5         | 3.48526   | 9.53333                | 0          | 1         | 1         |
| Supt4h1_j2       | 0         | 0.366608 1.79769e+308  |            | 0.021014  | 0.145805  |
| Supt4h1          | 1.21844   | 1.11266                | -0.131017  | 0.780441  | 0.925835  |
| Bzrap1_j2        | 0.334319  | 0.365411               | 0.128296   | 0.689994  | 0.885202  |
| Mks1_j2          | 0.310032  | 0.259456               | -0.256927  | 0.603967  | 0.843588  |
| Mks1_j1          | 0.218977  | 0.376781               | 0.78295    | 0.134508  | 0.456405  |
| Coil_j1          | 0.0709882 | 0.350206               | 2.30255    | 0.000156  | 0.0031187 |
| Mbtd1_j8         | 0.914393  | 1.20473                | 0          | 1         | 1         |
| Spag9_j4         | 0.0559587 | 0 -1.79769e+308        |            | 0.0078821 | 1         |
| Chad_j2          | 0         | 0.16159 1.79769e+308   |            | 0.023468  | 0.157149  |
| Ppp1r9b_j5       | 0.309821  | 0.707863               | 1.19203    | 0.0097837 | 0.0843205 |
| Samd14_j2        | 26.2648   | 24.5166                | -0.0993695 | 0.318617  | 0.662019  |
| Dlx3_j1          | 0.45883   | 0.642554               | 0.485857   | 0.177333  | 0.516623  |
| Dlx3_j3          | 0         | 0.16463 1.79769e+308   |            | 0.014681  | 0.113123  |
| Dlx3_j5          | 0         | 0.154857 1.79769e+308  |            | 0.0171562 | 1         |
| Gm11520          | 0.240172  | 0.245749               | 0          | 1         | 1         |
| Phb_j3           | 0.111089  | 0.106242               | -0.0643521 | 0.947119  | 1         |
| Zfp652_j2        | 0.0403346 | 0.184138               | 2.1907     | 8.99E-05  | 0.0019595 |
| Gngt2_j2         | 0.274012  | 0.127144               | -1.10777   | 0.454014  | 0.758413  |
| Gngt2_j5         | 0.0930036 | 0.146995               | 0.660412   | 0.698823  | 1         |
| Skap1_j2         | 0         | 0.251645 1.79769e+308  |            | 0.0028938 | 0.0334625 |
| Skap1_j3         | 0         | 0.0532821 1.79769e+308 |            | 0.217489  | 1         |
| Mrpl10_j1        | 16.3444   | 16.1875                | 0          | 1         | 1         |
| Mrpl10_j2        | 2.15178   | 2.11558                | 0          | 1         | 1         |
| Arhgap23_j1      | 1.21665   | 1.00454                | 0          | 1         | 1         |
| Lasp1_j4         | 6.68097   | 5.59983                | 0          | 1         | 1         |
| B230217C12Rik_j1 | 3.03566   | 2.16167                | -0.489867  | 0.0059752 | 0.0583482 |
| Ppp1r1b_j2       | 0.587598  | 0.281006               | -1.06423   | 0.178958  | 0.518612  |
| Wipf2_j3         | 0.175446  | 0.449269               | 0          | 1         | 1         |
| cdc6_j1          | 0         | 0.108392 1.79769e+308  |            | 0.0273073 | 1         |
| Rara_j2          | 0.809413  | 1.05832                | 0          | 1         | 1         |
| Ttc25_j3         | 0.0458308 | 0.104837               | 1.19375    | 0.218992  | 1         |
| Ttc25_j4         | 0         | 0.0571843 1.79769e+308 |            | 0.0696702 | 1         |
| Hsd17b1_j4       | 0.0326708 | 0.0922969              | 1.49828    | 0.365568  | 1         |
| Cntnap1_j1       | 0.0567347 | 0.0569715              | 0          | 1         | 1         |
| Psme3_j2         | 0.890053  | 0.935589               | 0.0719837  | 0.756831  | 0.91615   |

|                  |           |           |              |           |           |
|------------------|-----------|-----------|--------------|-----------|-----------|
| Aoc3_j4          | 0.205669  | 0.206433  | 0.0053487    | 0.993085  | 0.997985  |
| Nbr1_j2          | 0         | 0.049036  | 0            | 1         | 1         |
| Nags_j1          | 0.0479071 | 0.173697  | 1.85826      | 0.191162  | 0.533267  |
| BC030867_j3      | 0.150176  | 0.509801  | 1.76328      | 0.0707232 | 0.319662  |
| Rundc3a_j1       | 0.739736  | 1.04564   | 0            | 1         | 1         |
| Rundc3a_j2       | 0.0737485 | 0.170045  | 0            | 1         | 1         |
| Rundc3a_j11      | 29.8374   | 34.6955   | 0            | 1         | 1         |
| Adam11_j5        | 0.727242  | 0.587566  | 0            | 1         | 1         |
| Ccdc103_j1       | 0.171561  | 0.0989714 | 0            | 1         | 1         |
| Hexim2_j4        | 0         | 0.336751  | 1.79769e+308 | 0.0009124 | 0.0132913 |
| Fmnl1_j3         | 0.893513  | 0.0527364 | -4.08262     | 4.08E-06  | 0.0001418 |
| Fmnl1_j2         | 8.22335   | 8.65137   | 0.0732026    | 0.535064  | 0.806052  |
| Fmnl1_j6         | 0.0418185 | 0.15136   | 1.85577      | 0.0499386 | 1         |
| XLOC_004503      | 0.734402  | 0.722739  | 0            | 1         | 1         |
| Mettl2_j3        | 0         | 0.0532664 | 1.79769e+308 | 0.175577  | 1         |
| Mettl2_j9        | 0         | 0.101441  | 1.79769e+308 | 0.0982312 | 1         |
| Mrc2_j7          | 0.645843  | 0.983536  | 0.606794     | 0.09727   | 0.385499  |
| Ace_j4           | 0.811346  | 0.543531  | -0.577954    | 0.0533039 | 0.268707  |
| Map3k3_j2        | 2.78977   | 3.52378   | 0            | 1         | 1         |
| Helz_j8          | 0         | 0.0960346 | 0            | 1         | 1         |
| Helz_j7          | 0         | 0.123118  | 0            | 1         | 1         |
| Apoh_j1          | 0.411073  | 0.610353  | 0.570248     | 0.320324  | 0.663651  |
| Ccdc46_j6        | 0.436848  | 0.637736  | 0.545828     | 0.256895  | 0.60573   |
| Axin2_j3         | 0.331981  | 0.432236  | 0            | 1         | 1         |
| Arsg_j4          | 0         | 0.0982792 | 0            | 1         | 1         |
| Prkar1a_j3       | 0.185414  | 0.297697  | 0.683093     | 0.337445  | 0.677954  |
| Kcnj16_j1        | 0.24757   | 0.639706  | 1.36957      | 0.000142  | 0.0028728 |
| XLOC_004541      | 0.122126  | 0.24233   | 0.988602     | 0.454061  | 0.758413  |
| XLOC_004541      | 0         | 0.0894451 | 1.79769e+308 | 0.122434  | 1         |
| Dnaic2_j6        | 0         | 0.0935729 | 0            | 1         | 1         |
| Kif19a_j2        | 0.375138  | 0.143952  | 0            | 1         | 1         |
| Kif19a_j1        | 0.534295  | 1.00895   | 0            | 1         | 1         |
| Gprc5c_j3        | 0.763003  | 0.46456   | 0            | 1         | 1         |
| Cd300a           | 0         | 0.28242   | 0            | 1         | 1         |
| Cdr2l_j2         | 36.6603   | 33.3627   | -0.135983    | 0.131778  | 0.451722  |
| 2310067B10Rik_j2 | 2.2092    | 2.20388   | 0            | 1         | 1         |
| Sphk1_j3         | 0.124225  | 0.104696  | -0.246738    | 0.802571  | 1         |
| Mfsd11_j1        | 0.0487996 | 0.0986706 | 1.01575      | 0.142933  | 1         |
| XLOC_004580      | 0.0351938 | 0.177403  | 2.33364      | 0.215213  | 0.560987  |
| Tnrc6c_j7        | 1.75109   | 1.61151   | -0.119841    | 0.608621  | 0.845899  |
| Tmc8_j6          | 0         | 0.0696446 | 1.79769e+308 | 0.033726  | 1         |
| Tmc8_j12         | 0.0859733 | 0.242998  | 1.49899      | 0.199606  | 0.542596  |
| Pgs1_j1          | 0.0862003 | 0.102452  | 0            | 1         | 1         |
| Pgs1_j6          | 1.23826   | 1.42013   | 0            | 1         | 1         |
| XLOC_004590      | 0.499828  | 0.399701  | -0.322513    | 0.31845   | 0.661834  |
| XLOC_004594      | 0         | 0.134615  | 0            | 1         | 1         |
| Cbx2_j2          | 0         | 0.188966  | 1.79769e+308 | 0.0007799 | 0.0117402 |

|            |             |           |              |           |           |
|------------|-------------|-----------|--------------|-----------|-----------|
| Card14_j6  | 0.594463    | 0.825404  | 0.473512     | 0.0422739 | 0.232423  |
| Card14_j5  | 0.0590199   | 0.0778243 | 0.399019     | 0.597497  | 1         |
| Card14_j4  | 0.211904    | 0.245541  | 0.21255      | 0.604716  | 0.844018  |
| Rnf213_j5  | 0.297608    | 0.425062  | 0            | 1         | 1         |
| Rnf213_j7  | 0.0415091   | 0.143615  | 0            | 1         | 1         |
| Bahcc1_j9  | 0.000590891 | 0.0525563 | 6.47483      | 0.269538  | 1         |
| Hgs_j9     | 1.08147     | 0.69228   | -0.643573    | 0.0496697 | 0.257348  |
| Aspscr1_j1 | 5.56814     | 6.02288   | 0            | 1         | 1         |
| Hexdc_j2   | 3.98852     | 3.8874    | 0            | 1         | 1         |
| Tbcd_j4    | 0.716136    | 0.621167  | 0            | 1         | 1         |
| Tbcd_j8    | 8.81181     | 13.2783   | 0            | 1         | 1         |
| Drg1_j3    | 0.937417    | 0.5598    | 0            | 1         | 1         |
| Inpp5j_j2  | 0.465204    | 0.209027  | 0            | 1         | 1         |
| Smtn_j2    | 2.06929     | 3.42354   | 0.726351     | 0.0083352 | 0.0748143 |
| Osbp2_j3   | 1.02225     | 1.0408    | 0            | 1         | 1         |
| Osbp2      | 1.35177     | 1.68235   | 0            | 1         | 1         |
| Slc35e4_j1 | 13.4242     | 18.5612   | 0.467458     | 0.0008698 | 0.0127781 |
| Tcn2_j2    | 0.494853    | 1.21523   | 1.29616      | 0.0017615 | 0.0225822 |
| Ccdc157_j3 | 0.179039    | 0.12586   | -0.508449    | 0.204113  | 0.548338  |
| Ccdc157_j4 | 0.25752     | 0.254262  | -0.0183661   | 0.951586  | 0.986024  |
| Mtmr3_j4   | 0           | 0.37563   | 0            | 1         | 1         |
| Nf2_j1     | 3.97081     | 4.26901   | 0            | 1         | 1         |
| Nf2_j2     | 1.41653     | 1.85351   | 0            | 1         | 1         |
| Nefh_j1    | 0.10734     | 0.1581    | 0            | 1         | 1         |
| Nefh_j5    | 111.855     | 75.0799   | 0            | 1         | 1         |
| Nefh_j4    | 50.4742     | 26.3975   | 0            | 1         | 1         |
| Gas2l1_j3  | 0.372297    | 0.26896   | 0            | 1         | 1         |
| Ewsr1_j2   | 2.45813     | 2.46199   | 0            | 1         | 1         |
| Ewsr1_j3   | 4.06522     | 3.86932   | 0            | 1         | 1         |
| Ewsr1_j7   | 0           | 0.414423  | 0            | 1         | 1         |
| Kremen1_j2 | 0.165875    | 0.141333  | -0.230994    | 0.69775   | 0.888632  |
| Polm_j10   | 0.0716664   | 0.328479  | 2.19643      | 0.0019692 | 0.0246863 |
| Camk2b_j5  | 0.252346    | 0.365633  | 0            | 1         | 1         |
| Nudcd3_j2  | 5.49669     | 5.0737    | 0            | 1         | 1         |
| Ddx56_j1   | 0.0637824   | 0.245022  | 1.94168      | 0.099154  | 0.389683  |
| Myo1g_j1   | 0.000127871 | 0.188564  | 10.5261      | 0.960101  | 0.988634  |
| Myo1g_j2   | 0           | 0.070741  | 1.79769e+308 | 0.0529288 | 1         |
| Tbrg4_j2   | 1.35478     | 1.58535   | 0            | 1         | 1         |
| Tns3_j5    | 0.355229    | 0.387076  | 0            | 1         | 1         |
| Hus1_j3    | 0           | 0.148392  | 0            | 1         | 1         |
| Grb10_j1   | 0           | 0.073426  | 0            | 1         | 1         |
| Cobl_j1    | 1.63815     | 0.254838  | 0            | 1         | 1         |
| Plek       | 2.06286     | 2.26677   | 0.135993     | 0.375061  | 0.707307  |
| Actr2_j2   | 16.4404     | 45.8008   | 0            | 1         | 1         |
| Cep68_j3   | 11.233      | 12.26     | 0.126216     | 0.181743  | 0.521932  |
| Slc1a4_j1  | 9.7361      | 13.8257   | 0            | 1         | 1         |
| Ehbp1_j16  | 0.89706     | 2.85838   | 0            | 1         | 1         |

|             |           |           |              |           |           |           |
|-------------|-----------|-----------|--------------|-----------|-----------|-----------|
| XLOC_004718 | 0         | 0.189596  | 1.79769e+308 |           | 0.0451709 | 0.243192  |
| XLOC_004718 | 0.067314  | 0.146566  |              | 1.12257   | 0.402488  | 1         |
| Rel_j3      | 0         | 0.0518536 | 1.79769e+308 |           | 0.200796  | 1         |
| Ccdc85a_j2  | 2.93657   | 2.27667   |              | 0         | 1         | 1         |
| Eml6        | 0.743114  | 0.791867  |              | 0         | 1         | 1         |
| Eml6_j7     | 0.485009  | 0.260625  |              | 0         | 1         | 1         |
| Acyp2_j2    | 2.42408   | 6.07482   |              | 1.3254    | 3.38E-05  | 0.0008569 |
| Npm1_j3     | 2.51503   | 2.65388   |              | 0.0775288 | 0.680086  | 0.879617  |
| Dock2_j1    | 0.208841  | 0.242068  |              | 0.213007  | 0.678401  | 0.879072  |
| Ccdc99_j5   | 0.0163252 | 0.0790851 |              | 2.27631   | 0.168512  | 1         |
| Wwc1_j3     | 0         | 0.182859  | 1.79769e+308 |           | 0.0300626 | 0.186022  |
| Odz2_j6     | 0         | 0.393303  | 1.79769e+308 |           | 3.35E-09  | 2.55E-07  |
| Ccng1_j1    | 11.9543   | 15.6848   |              | 0         | 1         | 1         |
| Gabrg2_j5   | 5.44327   | 3.99958   |              | 0         | 1         | 1         |
| Gabrg2_j4   | 1.42532   | 1.38957   |              | 0         | 1         | 1         |
| Ublcp1_j10  | 6.51705   | 5.06781   |              | 0         | 1         | 1         |
| Ublcp1_j12  | 0.796625  | 0.936901  |              | 0         | 1         | 1         |
| ltk_j2      | 0.167203  | 0.319494  |              | 0.934194  | 0.0852519 | 0.356401  |
| Sqstm1_j3   | 99.1388   | 119.234   |              | 0         | 1         | 1         |
| Sqstm1_j4   | 50.332    | 55.5152   |              | 0         | 1         | 1         |
| Maml1       | 0.331794  | 0.768609  |              | 1.21196   | 2.67E-05  | 0.0007014 |
| Zfp354c_j1  | 0         | 0.0900417 |              | 0         | 1         | 1         |
| Zfp454_j1   | 0.353539  | 0.306601  |              | -0.205507 | 0.697432  | 0.888592  |
| Zfp454      | 1.16734   | 0.977574  |              | -0.255944 | 0.3311    | 0.672845  |
| Zfp354b_j2  | 0.0384389 | 0.076319  |              | 0.989474  | 0.430219  | 1         |
| Sec24a_j1   | 0.0519392 | 0.232578  |              | 2.16282   | 0.0004556 | 0.0075388 |
| Rad50_j2    | 0         | 0.135069  | 1.79769e+308 |           | 0.0003736 | 1         |
| Lym7_j2     | 0.137766  | 0.210856  |              | 0.614032  | 0.320641  | 0.663883  |
| Tnip1_j7    | 2.02377   | 4.25991   |              | 1.07378   | 1.48E-10  | 1.45E-08  |
| Tnip1_j8    | 3.72642   | 5.86695   |              | 0.654821  | 4.43E-06  | 0.0001519 |
| Anxa6_j3    | 0.238591  | 0.369008  |              | 0         | 1         | 1         |
| Ccdc69_j2   | 0         | 0.06006   | 1.79769e+308 |           | 0.11004   | 1         |
| Gemin5_j3   | 1.41221   | 1.41487   |              | 0         | 1         | 1         |
| Rnf187_j1   | 185.514   | 196.251   |              | 0.0811733 | 0.346909  | 0.685763  |
| Guk1_j2     | 0.806785  | 4.61395   |              | 2.51575   | 1.99E-10  | 1.89E-08  |
| Arf1_j1     | 0.552706  | 0.550527  |              | 0         | 1         | 1         |
| Cops3_j1    | 4.35111   | 8.42046   |              | 0.952515  | 1.40E-06  | 5.52E-05  |
| Cops3_j2    | 0.244203  | 0.362412  |              | 0.569549  | 0.394252  | 0.719811  |
| Top3a_j2    | 0.0320302 | 0.0973414 |              | 1.60362   | 0.0578761 | 1         |
| Usp22_j5    | 0.326236  | 0.234102  |              | 0         | 1         | 1         |
| Slc47a2_j5  | 0.174532  | 0.418802  |              | 1.26277   | 0.0347165 | 0.204635  |
| Slc47a1_j10 | 0         | 0.194304  | 1.79769e+308 |           | 0.0133093 | 0.105765  |
| Rnf112_j12  | 11.7554   | 10.605    |              | 0         | 1         | 1         |
| Epn2_j1     | 0.812101  | 1.23673   |              | 0         | 1         | 1         |
| Prpsap2_j7  | 0         | 0.060947  | 1.79769e+308 |           | 0.186599  | 1         |
| Ncor1_j1    | 0.29325   | 0.0922889 |              | 0         | 1         | 1         |
| Cox10_j2    | 6.14086   | 5.448     |              | -0.172713 | 0.267034  | 0.616066  |

|                  |            |                        |                     |           |   |
|------------------|------------|------------------------|---------------------|-----------|---|
| Arhgap44_j2      | 0          | 0.208678               | 0                   | 1         | 1 |
| Arhgap44_j3      | 0          | 0.330278               | 0                   | 1         | 1 |
| Dnahc9_j6        | 0          | 0.0501259 1.79769e+308 | 0.0412521           |           | 1 |
| Dnahc9_j10       | 0.0192692  | 0.0470863              | 1.28901 0.416543    |           | 1 |
| Ndel1_j2         | 0          | 0.312276               | 0                   | 1         | 1 |
| Chd3_j8          | 1.33682    | 0.869293               | 0                   | 1         | 1 |
| Kdm6b_j1         | 0.0255498  | 0.606078               | 0                   | 1         | 1 |
| Kdm6b_j2         | 0.0155446  | 1.19682                | 0                   | 1         | 1 |
| Dnahc2_j8        | 0          | 0.0557124 1.79769e+308 | 0.0781646           |           | 1 |
| Eif4a1_j7        | 1.17446    | 1.32888                | 0                   | 1         | 1 |
| Fgf11_j1         | 1.08758    | 2.66649                | 1.29382 3.48E-08    | 2.15E-06  |   |
| Tmem102          | 0.0654953  | 0.201799               | 1.62346 0.0206727   | 0.144135  |   |
| Acap1_j3         | 0          | 0.140426 1.79769e+308  | 0.0314671           |           | 1 |
| 2810408A11Rik_j5 | 0.0501269  | 0.247448               | 2.30347 0.0266062   | 0.171585  |   |
| Eif5a_j1         | 123.781    | 139.091                | 0                   | 1         | 1 |
| Slc2a4_j1        | 0.0891015  | 0.194098               | 1.12326             | 1         | 1 |
| Slc16a13_j6      | 0          | 0.213978 1.79769e+308  | 0.0022996           | 0.0278674 |   |
| Pelp1_j2         | 6.99243    | 7.58355                | 0.117078 0.346605   | 0.685483  |   |
| Cxcl16           | 0.184423   | 0.212867               | 0.20694 0.62474     | 0.853461  |   |
| Spag7_j1         | 15.9151    | 18.9725                | 0                   | 1         | 1 |
| Pitpnm3_j3       | 0.608136   | 0.892857               | 0.554035 0.0378024  | 0.2158    |   |
| Pitpnm3_j5       | 0          | 0.059336 1.79769e+308  | 0.0128048           |           | 1 |
| Slc13a5_j3       | 0.0752368  | 0.297352               | 1.98266 0.104251    | 0.400557  |   |
| Spns3_j2         | 0.0338928  | 0.198727               | 2.55173 0.0342369   | 0.202738  |   |
| Spns3_j1         | 0.0514093  | 0.0789474              | 0.618861 0.710717   |           | 1 |
| Cyb5d2           | 4.82808    | 4.72279                | 0                   | 1         | 1 |
| mKIAA1039_j1     | 0.0705423  | 0.34166                | 0                   | 1         | 1 |
| Sgsm2_j5         | 1.14233    | 0.603796               | 0                   | 1         | 1 |
| Rpa1_j2          | 0.905321   | 0.781086               | 0                   | 1         | 1 |
| Wdr81_j1         | 4.87261    | 7.11591                | 0.546352 0.0002297  | 0.0043008 |   |
| Fam101b_j1       | 2.37879    | 1.84277                | 0                   | 1         | 1 |
| Vps53_j3         | 0.415181   | 0.552126               | 0                   | 1         | 1 |
| Abr_j5           | 0.00287415 | 8.00163                | 0                   | 1         | 1 |
| Cpd_j1           | 17.7806    | 18.6203                | 0.0665695 0.48278   | 0.77583   |   |
| Efcab5_j1        | 0.0957083  | 0.104605               | 0.128237 0.900013   |           | 1 |
| Ankrd13b_j4      | 13.3804    | 26.9509                | 0                   | 1         | 1 |
| Taok1_j4         | 0          | 0.0641099              | 0                   | 1         | 1 |
| Pipox_j9         | 0          | 0.220803 1.79769e+308  | 0.0192988           | 0.137487  |   |
| Supt6h_j2        | 5.34106    | 5.96294                | 0                   | 1         | 1 |
| Sarm1_j2         | 0.139611   | 2.40297                | 0                   | 1         | 1 |
| Tnfaip1_j1       | 4.15683    | 5.50805                | 0                   | 1         | 1 |
| Tmem97_j1        | 0.628825   | 0.59824                | -0.0719324 0.931002 | 0.978914  |   |
| Ksr1_j15         | 3.54604    | 3.5465                 | 0.00018729 0.999147 | 0.999631  |   |
| Ksr1_j17         | 0.292309   | 0.48637                | 0.734562 0.0364522  | 0.211118  |   |
| Ksr1_j16         | 0.845572   | 0.883611               | 0.0634838 0.766265  | 0.920277  |   |
| Wsb1_j2          | 0.901086   | 5.47241                | 0                   | 1         | 1 |
| Evi2b            | 0.0366456  | 0.225724               | 2.62284 0.0151008   | 0.115427  |   |

|                  |           |                        |           |           |           |
|------------------|-----------|------------------------|-----------|-----------|-----------|
| Utp6_j1          | 1.66138   | 2.18401                | 0.394597  | 0.0952403 | 0.381032  |
| Accn1_j6         | 0         | 0.0934294              | 0         | 1         | 1         |
| Accn1_j1         | 0.694367  | 0.770651               | 0.15038   | 0.782147  | 0.926378  |
| Cct6b_j1         | 0.299938  | 0.322147               | 0.103054  | 0.906518  | 0.970402  |
| Slfn9_j2         | 0.0181606 | 0.384715               | 0         | 1         | 1         |
| Gm12576_j2       | 0         | 0.155037 1.79769e+308  |           | 0.0976016 | 1         |
| Tada2a_j5        | 1.45149   | 2.00479                | 0         | 1         | 1         |
| Mrm1_j1          | 6.19931   | 7.086                  | 0.192864  | 0.222146  | 0.569314  |
| Ggnbp2_j4        | 1.74774   | 1.28638                | -0.442175 | 0.316411  | 0.660085  |
| Ggnbp2_j5        | 0.0421624 | 0.0708193              | 0.748185  | 0.539378  | 1         |
| Ggnbp2_j7        | 0         | 0.0623015 1.79769e+308 |           | 0.0677164 | 1         |
| Usp32_j5         | 0         | 0.14525                | 0         | 1         | 1         |
| Appbp2_j2        | 0         | 0.0705706              | 0         | 1         | 1         |
| AK135737_j2      | 0.200982  | 0.114642               | -0.809937 | 0.432506  | 0.744252  |
| Med13_j2         | 0.582846  | 0.807945               | 0         | 1         | 1         |
| Tmem49_j1        | 4.89311   | 12.7842                | 0         | 1         | 1         |
| Tmem49_j2        | 1.99599   | 4.50442                | 0         | 1         | 1         |
| Tmem49_j3        | 0.728662  | 0.480129               | 0         | 1         | 1         |
| 1200011M11Rik_j1 | 2.17137   | 3.25808                | 0.585413  | 0.019529  | 0.138663  |
| Rad51c           | 0.522202  | 0.611561               | 0.227888  | 0.565074  | 0.823689  |
| Msi2_j1          | 0         | 0.0650987              | 0         | 1         | 1         |
| Scpep1_j2        | 3.40051   | 11.3365                | 0         | 1         | 1         |
| Pctp_j1          | 8.62351   | 5.48764                | -0.652089 | 4.88E-05  | 0.00117   |
| Hlf_j1           | 0.0410759 | 0.145517               | 1.82482   | 0.0155542 | 1         |
| Luc7l3_j3        | 1.87865   | 2.49146                | 0         | 1         | 1         |
| Luc7l3           | 2.54288   | 2.8749                 | 0         | 1         | 1         |
| Abcc3_j2         | 0         | 0.164025 1.79769e+308  |           | 0.0871765 | 0.361104  |
| Abcc3_j8         | 0         | 0.19674 1.79769e+308   |           | 0.0710506 | 0.320458  |
| Mycbpap_j4       | 0         | 0.071476               | 0         | 1         | 1         |
| Acsf2_j4         | 0         | 0.116406 1.79769e+308  |           | 0.177833  | 1         |
| Itga3_j6         | 0         | 0.122076 1.79769e+308  |           | 0.0019309 | 1         |
| Gm11515_j1       | 0.0646518 | 0.151986               | 1.23317   | 0.167358  | 1         |
| Myst2_j8         | 0.889424  | 1.3604                 | 0         | 1         | 1         |
| Nxph3_j2         | 0         | 0.370994 1.79769e+308  |           | 0.0018163 | 0.0231692 |
| Ngfr_j2          | 57.9529   | 69.8934                | 0         | 1         | 1         |
| Abi3_j1          | 0.119897  | 0.0999296              | -0.262809 | 0.676994  | 1         |
| Ube2z_j2         | 19.741    | 19.2898                | 0         | 1         | 1         |
| Gm11536_j1       | 0         | 0.156777 1.79769e+308  |           | 0.0117494 | 1         |
| Nfe2l1           | 39.6147   | 62.0683                | 0         | 1         | 1         |
| Nfe2l1           | 42.8124   | 39.6209                | 0         | 1         | 1         |
| Cdk5rap3_j3      | 0.548957  | 0.752388               | 0.454785  | 0.302363  | 0.648402  |
| Tbkbp1_j1        | 6.18918   | 6.34981                | 0         | 1         | 1         |
| Npepps_j4        | 1.46464   | 1.67625                | 0         | 1         | 1         |
| Srcin1_j5        | 0.248019  | 0.746824               | 0         | 1         | 1         |
| AK155239_j3      | 0         | 0.911189               | 0         | 1         | 1         |
| Pcgf2_j2         | 1.13858   | 0.643382               | -0.82349  | 0.0276101 | 0.175894  |
| Pcgf2_j3         | 3.25935   | 3.35325                | 0.0409766 | 0.821776  | 0.94254   |

|                  |            |                        |            |           |           |
|------------------|------------|------------------------|------------|-----------|-----------|
| Pip4k2b_j3       | 7.66059    | 9.58974                | 0          | 1         | 1         |
| Rpl23_j9         | 0          | 0.488392 1.79769e+308  | 0.0140015  | 0.109497  |           |
| Plxdc1_j2        | 0          | 0.118444 1.79769e+308  | 0.0312423  |           | 1         |
| Plxdc1_j3        | 0          | 0.154775 1.79769e+308  | 0.0058009  |           | 1         |
| Arl5c            | 0.06287    | 0.0408889              | -0.620664  | 0.741182  | 1         |
| Cacnb1_j1        | 7.60495    | 9.60993                | 0          | 1         | 1         |
| Pgap3_j2         | 0.66953    | 1.47568                | 0          | 1         | 1         |
| Gm12355          | 14.9965    | 15.2871                | 0.0276865  | 0.827729  | 0.944579  |
| Med24_j1         | 0          | 0.127743               | 0          | 1         | 1         |
| Krt19_j2         | 0          | 0.0636745 1.79769e+308 | 0.156717   |           | 1         |
| Hap1_j3          | 0.0509279  | 0.0507444              | 0          | 1         | 1         |
| Nt5c3l_j2        | 0.872707   | 1.78621                | 1.03333    | 0.0084193 | 0.0753748 |
| Acly_j4          | 44.1537    | 59.8333                | 0          | 1         | 1         |
| Acly_j6          | 33.0178    | 46.5045                | 0          | 1         | 1         |
| Dnajc7_j6        | 13.3354    | 14.876                 | 0.157728   | 0.127076  | 0.444145  |
| Dnajc7_j7        | 0.957217   | 1.086                  | 0.182103   | 0.472191  | 0.769302  |
| Kcnh4_j2         | 0          | 0.0467822 1.79769e+308 | 0.0830344  |           | 1         |
| Stat5b_j3        | 0          | 0.426242               | 0          | 1         | 1         |
| Plekh3_j1        | 0.931504   | 0.569451               | -0.709989  | 0.0482379 | 0.252681  |
| 1700113I22Rik_j1 | 0.0933875  | 0.200413               | 1.10167    | 0.349204  | 0.687028  |
| Meox1_j2         | 0.154843   | 0.407443               | 1.39579    | 0.0432358 | 0.235975  |
| Mpp2_j3          | 0          | 0.108543               | 0          | 1         | 1         |
| Lsm12_j1         | 12.9363    | 16.7171                | 0.369897   | 0.0035729 | 0.039578  |
| Hdac5            | 7.64685    | 6.16335                | 0          | 1         | 1         |
| Hdac5            | 1.43275    | 1.62313                | 0          | 1         | 1         |
| Ubtj_j2          | 1.43741    | 1.61916                | 0          | 1         | 1         |
| Itga2b_j7        | 0.0169892  | 0.107418               | 2.66055    | 0.035525  | 1         |
| Gpatch8_j3       | 0.527284   | 0.826908               | 0          | 1         | 1         |
| Gpatch8_j4       | 0.347065   | 0.396118               | 0          | 1         | 1         |
| Ccdc43_j1        | 5.07808    | 4.82814                | -0.0728139 | 0.686479  | 0.883229  |
| Gfap_j3          | 0          | 0.234851 1.79769e+308  | 0.0093693  | 0.0816588 |           |
| Gfap_j4          | 0          | 0.0918869 1.79769e+308 | 0.0528589  |           | 1         |
| 4933400C05Rik_j1 | 0          | 0.0596142 1.79769e+308 | 0.167204   |           | 1         |
| Map3k14_j1       | 0.038768   | 0.191391               | 2.30359    | 0.0046071 | 0.0477659 |
| Plekhm1_j1       | 1.11281    | 2.27663                | 0          | 1         | 1         |
| XLOC_005258      | 0.120638   | 0.253773               | 1.07285    | 0.465532  | 0.765429  |
| Ftsj3_j2         | 0          | 1.2112                 | 0          | 1         | 1         |
| Ftsj3            | 8.31326    | 8.27552                | 0          | 1         | 1         |
| Smarcd2          | 3.66497    | 3.82824                | 0          | 1         | 1         |
| Scn4a_j3         | 0.00620182 | 0.191162               | 0          | 1         | 1         |
| Icam2_j3         | 0.105222   | 0.174618               | 0.730759   | 0.638904  | 0.860198  |
| Ern1_j1          | 0.841238   | 0.662983               | 0          | 1         | 1         |
| Ddx5_j3          | 3.39405    | 2.04137                | 0          | 1         | 1         |
| Ddx5_j7          | 11.0875    | 10.9793                | 0          | 1         | 1         |
| Kpna2_j1         | 4.44051    | 5.7318                 | 0.368263   | 0.0635288 | 0.298841  |
| Bptf_j8          | 0          | 0.140049 1.79769e+308  | 5.22E-06   |           | 1         |
| Pitpnc1_j2       | 0.127829   | 0.580912               | 0          | 1         | 1         |



|                  |           |           |              |           |           |
|------------------|-----------|-----------|--------------|-----------|-----------|
| Fam20a_j3        | 0.0245448 | 0.0503195 | 1.0357       | 0.521227  | 1         |
| Abca5_j2         | 0.0861755 | 2.03116   | 0            | 1         | 1         |
| XLOC_005303      | 0.113254  | 0.670917  | 2.56657      | 0.1003    | 0.391964  |
| 2610035D17Rik    | 0.598453  | 0.861546  | 0            | 1         | 1         |
| Cdc42ep4_j1      | 5.07396   | 8.36963   | 0            | 1         | 1         |
| Sdk2_j1          | 0.264247  | 0.271134  | 0.0371187    | 0.906721  | 0.970429  |
| Fdxr_j2          | 0.734255  | 0.518835  | 0            | 1         | 1         |
| Fdxr_j1          | 0         | 0.217896  | 0            | 1         | 1         |
| C630004H02Rik_j1 | 7.90444   | 12.8089   | 0            | 1         | 1         |
| C630004H02Rik_j2 | 0         | 0.816457  | 0            | 1         | 1         |
| Recql5_j4        | 0         | 0.432603  | 1.79769e+308 | 0.0001682 | 0.0033206 |
| Recql5_j5        | 0         | 0.570128  | 1.79769e+308 | 2.70E-07  | 1.30E-05  |
| Unc13d_j3        | 0.311049  | 0.533063  | 0.777165     | 0.337505  | 0.677992  |
| Unc13d_j11       | 0.0472707 | 0.105442  | 1.15744      | 0.20339   | 1         |
| Trim47_j1        | 0.0515484 | 0.220681  | 2.09796      | 0.0329285 | 0.197656  |
| Mrpl38_j2        | 0.684045  | 0.841116  | 0.298215     | 0.107574  | 0.407702  |
| Fbf1_j3          | 2.35106   | 2.33113   | 0            | 1         | 1         |
| Fbf1_j5          | 0.292428  | 0.517498  | 0            | 1         | 1         |
| Fbf1_j7          | 0.544102  | 0.57134   | 0            | 1         | 1         |
| Fbf1_j6          | 0.0961411 | 0.288083  | 0            | 1         | 1         |
| Evpl_j1          | 0.129882  | 0.128861  | 0            | 1         | 1         |
| Srp68_j2         | 7.14176   | 10.4518   | 0            | 1         | 1         |
| Prpsap1_j5       | 15.2228   | 17.5869   | 0            | 1         | 1         |
| Ube2o_j1         | 16.6738   | 18.0028   | 0            | 1         | 1         |
| Rhbdf2_j4        | 0         | 0.280132  | 1.79769e+308 | 8.69E-05  | 0.0019016 |
| St6galnac2_j1    | 0.04256   | 0.0742954 | 0.803775     | 0.526187  | 1         |
| XLOC_005363      | 1.99794   | 2.07517   | 0.0547205    | 0.885523  | 0.963679  |
| Cyth1_j2         | 1.87553   | 2.02675   | 0            | 1         | 1         |
| Usp36_j6         | 9.00E-05  | 0.455077  | 0            | 1         | 1         |
| Timp2_j3         | 222.578   | 189.963   | 0            | 1         | 1         |
| Rbfox3_j1        | 7.72975   | 15.2871   | 0            | 1         | 1         |
| Rbfox3_j10       | 0.76432   | 0.999955  | 0            | 1         | 1         |
| Tbc1d16_j1       | 0         | 0.0490685 | 0            | 1         | 1         |
| Eif4a3_j2        | 0.0548656 | 0.0234849 | -1.22417     | 0.574305  | 1         |
| Nptx1_j1         | 44.3108   | 30.4365   | -0.541852    | 7.92E-10  | 6.78E-08  |
| Aatk_j11         | 5.98102   | 9.48403   | 0            | 1         | 1         |
| Slc38a10_j2      | 0.661629  | 0.622007  | 0            | 1         | 1         |
| Slc38a10_j4      | 0.453737  | 0.568125  | 0            | 1         | 1         |
| Nploc4_j3        | 23.9511   | 23.7942   | 0            | 1         | 1         |
| Pde6g            | 6.10E-06  | 0.181172  | 14.8583      | 0.996721  | 0.999085  |
| Sirt7_j3         | 0.117744  | 0.0294428 | 0            | 1         | 1         |
| Sirt7_j4         | 0         | 0.187173  | 0            | 1         | 1         |
| Notum            | 0.0548014 | 0.115791  | 1.07924      | 0.426567  | 1         |
| Notum_j4         | 0.11358   | 0.219148  | 0.948193     | 0.49161   | 0.780573  |
| Ccdc57_j3        | 0.0444594 | 0.0504394 | 0.182062     | 0.885503  | 1         |
| Ccdc57_j5        | 0         | 0.0798078 | 1.79769e+308 | 0.0162353 | 1         |
| Csnk1d_j2        | 37.7342   | 38.4699   | 0            | 1         | 1         |

|                  |           |           |               |           |           |
|------------------|-----------|-----------|---------------|-----------|-----------|
| Wdr45l_j3        | 0         | 4.66161   | 0             | 1         | 1         |
| Rab40b_j3        | 0         | 0.0931566 | 1.79769e+308  | 0.0601004 | 1         |
| XLOC_006538      | 0.450096  | 0.395193  | -0.187676     | 0.739546  | 0.908646  |
| Kif3c            | 29.8789   | 28.36     | 0             | 1         | 1         |
| Dtnb_j3          | 2.33515   | 0.950439  | -1.29685      | 3.90E-09  | 2.95E-07  |
| Dtnb_j2          | 1.43446   | 0.726123  | -0.982221     | 7.52E-05  | 0.0016827 |
| XLOC_006542      | 2.88327   | 2.63741   | -0.128584     | 0.594413  | 0.838496  |
| Dnmt3a_j1        | 0.626976  | 0.314284  | 0             | 1         | 1         |
| Dnajc27          | 5.02471   | 2.2915    | 0             | 1         | 1         |
| Adcy3_j3         | 0.491374  | 0.343946  | 0             | 1         | 1         |
| Adcy3_j5         | 0.330642  | 0.672081  | 0             | 1         | 1         |
| BC067010_j1      | 2.28741   | 2.32258   | 0.0220152     | 0.897371  | 0.967349  |
| XLOC_006549      | 0.210632  | 0.172894  | -0.284838     | 0.629434  | 0.856004  |
| Its2             | 0.267263  | 0.177986  | -0.586499     | 0.0915177 | 0.371785  |
| Atad2b_j3        | 0.171938  | 0.155423  | 0             | 1         | 1         |
| Atad2b_j2        | 0.0827733 | 4.52E-05  | 0             | 1         | 1         |
| 2810032G03Rik    | 2.40901   | 1.75771   | 0             | 1         | 1         |
| XLOC_006559      | 0.208528  | 0.105398  | -0.984396     | 0.164849  | 0.500932  |
| 1110057K04Rik    | 2.88638   | 3.01019   | 0             | 1         | 1         |
| 1110057K04Rik_j1 | 8.63782   | 8.73049   | 0             | 1         | 1         |
| XLOC_006561      | 0.0632219 | 0         | 0             | 1         | 1         |
| XLOC_006561      | 0.139295  | 0.0662131 | 0             | 1         | 1         |
| Hs1bp3           | 4.10217   | 3.5924    | 0             | 1         | 1         |
| Pum2_j10         | 6.0467    | 5.47081   | 0             | 1         | 1         |
| Sdc1_j1          | 13.2647   | 29.7917   | 1.16732       | 0         | 0         |
| Laptm4a          | 46.8615   | 52.5827   | 0.166186      | 0.0830566 | 0.351173  |
| Wdr35            | 2.28703   | 1.83071   | 0             | 1         | 1         |
| Wdr35            | 2.31092   | 1.89184   | 0             | 1         | 1         |
| Ttc32            | 1.29078   | 1.26059   | -0.0341447    | 0.901635  | 0.968734  |
| Rdh14            | 8.38159   | 9.15176   | 0.126824      | 0.388748  | 0.716153  |
| XLOC_006574      | 0.12182   | 0.106922  | -0.188195     | 0.77741   | 1         |
| Smc6             | 5.81991   | 5.85056   | 0.00757839    | 0.945505  | 0.983783  |
| Rad51ap2         | 0.116694  | 0.0516901 | -1.17477      | 0.536495  | 1         |
| Fam49a           | 1.69522   | 1.19632   | 0             | 1         | 1         |
| Fam49a           | 0.500276  | 0.425034  | 0             | 1         | 1         |
| XLOC_006578      | 0.127044  | 0         | -1.79769e+308 | 0.0526156 | 1         |
| XLOC_006579      | 0.170786  | 0.134361  | -0.34608      | 0.639716  | 0.860687  |
| XLOC_006580      | 0.127826  | 0.113689  | -0.169079     | 0.793621  | 1         |
| XLOC_006581      | 0.171973  | 0.067075  | -1.35833      | 0.330561  | 0.672467  |
| Nbas_j1          | 1.97863   | 0.835451  | 0             | 1         | 1         |
| Nbas_j8          | 0.468157  | 0.355741  | 0             | 1         | 1         |
| Nbas_j7          | 3.9613    | 3.50535   | 0             | 1         | 1         |
| XLOC_006586      | 0.175432  | 0.0992145 | -0.82229      | 0.206785  | 0.551437  |
| XLOC_006586      | 0.159528  | 0.147736  | -0.110785     | 0.870853  | 0.958871  |
| AK045700_j1      | 0.253393  | 0.146234  | -0.793101     | 0.274404  | 0.623505  |
| XLOC_006588      | 0.375348  | 0.338148  | -0.150575     | 0.608874  | 0.84604   |
| Ntsr2_j2         | 0.264782  | 0.176771  | -0.582927     | 0.442388  | 0.750549  |

|              |             |           |               |           |           |
|--------------|-------------|-----------|---------------|-----------|-----------|
| Ntsr2_j1     | 0.732312    | 0.501283  | -0.546834     | 0.0548468 | 0.273143  |
| Ntsr2        | 0.306009    | 0.192224  | -0.670787     | 0.346154  | 0.685401  |
| E2f6         | 9.51161     | 9.10268   | 0             | 1         | 1         |
| E2f6         | 12.0917     | 8.74928   | 0             | 1         | 1         |
| E2f6_j2      | 0.48118     | 0.469185  | 0             | 1         | 1         |
| Rock2        | 3.29177     | 3.71957   | 0.176275      | 0.0707568 | 0.319729  |
| Pdia6        | 43.9975     | 50.9041   | 0.210359      | 0.0216063 | 0.148666  |
| Nol10_j1     | 0.828711    | 0.361505  | 0             | 1         | 1         |
| Nol10_j3     | 1.63498     | 1.01852   | 0             | 1         | 1         |
| Odc1_j12     | 0.196063    | 0.216784  | 0.144939      | 0.86993   | 0.958673  |
| Hpcal1_j2    | 2.76936     | 0.313813  | -3.14158      | 4.01E-06  | 0.0001396 |
| XLOC_006602  | 2.73483     | 1.7052    | 0             | 1         | 1         |
| Cpsf3        | 8.58034     | 7.23783   | 0             | 1         | 1         |
| AK133650_j1  | 1.254       | 1.14073   | -0.136576     | 0.51279   | 0.7923    |
| XLOC_006609  | 0.214814    | 0.132391  | -0.698287     | 0.182363  | 0.522846  |
| XLOC_006609  | 0.190643    | 0.192653  | 0.0151309     | 0.971066  | 0.991875  |
| Taf1b        | 0.688623    | 0.673066  | -0.0329672    | 0.923151  | 0.976043  |
| Grhl1_j2     | 0.151032    | 0.104409  | -0.53261      | 0.403988  | 0.72656   |
| Klf11        | 2.41459     | 1.92007   | 0             | 1         | 1         |
| Rrm2_j4      | 0.240321    | 0.0359709 | -2.74006      | 0.0872256 | 0.361215  |
| Mboat2       | 1.15449     | 1.14327   | -0.0140971    | 0.946191  | 0.98395   |
| Mboat2       | 7.63932     | 7.30727   | -0.0641124    | 0.527317  | 0.801511  |
| Kidins220_j2 | 6.15052     | 5.72402   | 0             | 1         | 1         |
| Kidins220_j4 | 39.7292     | 45.7037   | 0             | 1         | 1         |
| Cmpk2        | 6.28538     | 5.0564    | -0.313889     | 0.0177646 | 0.129705  |
| Rnaseh1      | 5.64809     | 5.76448   | 0.0294272     | 0.850368  | 0.952392  |
| Adi1         | 6.73891     | 6.11486   | -0.140195     | 0.304378  | 0.650023  |
| Tssc1        | 13.0004     | 13.7718   | 0.0831516     | 0.489738  | 0.779571  |
| XLOC_006629  | 0.126007    | 0.0958382 | -0.394834     | 0.584616  | 1         |
| Myt1l        | 0.000622821 | 0.202999  | 0             | 1         | 1         |
| Pxdn         | 0.769082    | 0.126624  | 0             | 1         | 1         |
| Pxdn_j4      | 0.186553    | 0.472231  | 0             | 1         | 1         |
| Pxdn_j9      | 0.772515    | 0.173723  | 0             | 1         | 1         |
| Tmem18       | 12.7171     | 12.0361   | -0.0793991    | 0.452331  | 0.757478  |
| Sh3yl1       | 4.02146     | 5.51605   | 0.455917      | 0.0050368 | 0.0509945 |
| Lamb1        | 0.589382    | 0.648662  | 0             | 1         | 1         |
| Lamb1_j5     | 0.0270204   | 0.121536  | 0             | 1         | 1         |
| Cog5_j3      | 0.873317    | 0.738081  | 0             | 1         | 1         |
| Nampt        | 7.35418     | 6.92583   | -0.0865786    | 0.446453  | 0.753343  |
| Nampt_j2     | 1.28773     | 1.15835   | -0.152754     | 0.538939  | 0.80821   |
| Sypl         | 7.33176     | 6.43663   | -0.187853     | 0.0935228 | 0.376665  |
| Atxn7l1      | 5.20872     | 4.61509   | -0.17457      | 0.267351  | 0.616277  |
| Atxn7l1_j2   | 0.0519205   | 0         | -1.79769e+308 | 0.0020824 | 1         |
| Efcab10      | 2.2565      | 1.66904   | -0.43507      | 0.20427   | 0.548428  |
| Twistnb_j1   | 1.94572     | 1.93697   | -0.00650429   | 0.971756  | 0.991962  |
| Twist1       | 0.571064    | 0.642828  | 0.17078       | 0.642018  | 0.86192   |
| Snx13_j2     | 1.27877     | 1.04123   | 0             | 1         | 1         |

|             |           |                 |            |           |           |
|-------------|-----------|-----------------|------------|-----------|-----------|
| Snx13       | 4.3436    | 4.20155         | 0          | 1         | 1         |
| Snx13_j8    | 1.55651   | 2.01807         | 0          | 1         | 1         |
| Snx13_j10   | 0.765958  | 0.921315        | 0          | 1         | 1         |
| Ankmy2      | 7.09311   | 6.26483         | 0          | 1         | 1         |
| Sostdc1     | 20.2009   | 21.455          | 0.0868916  | 0.406518  | 0.727764  |
| Ispd        | 2.00384   | 1.93024         | 0          | 1         | 1         |
| Ispd_j1     | 0.199967  | 0.243649        | 0          | 1         | 1         |
| Meox2       | 0.676986  | 0.88553         | 0.387416   | 0.107256  | 0.407079  |
| Tmem195     | 1.14369   | 1.02136         | -0.163212  | 0.537962  | 0.807846  |
| Dgkb_j3     | 0.943245  | 6.53E-05        | 0          | 1         | 1         |
| Dgkb        | 0.456864  | 0.666785        | 0          | 1         | 1         |
| Etv1_j3     | 1.06588   | 0.488004        | -1.12708   | 0.114921  | 0.421814  |
| Etv1_j6     | 0.841616  | 0.273584        | -1.62118   | 0.0572328 | 0.280348  |
| Dock4       | 1.49822   | 1.47462         | -0.0229038 | 0.885494  | 0.963679  |
| Dock4_j3    | 2.51444   | 2.73229         | 0.11987    | 0.459239  | 0.761406  |
| Pnpla8_j1   | 0.917734  | 1.12986         | 0          | 1         | 1         |
| Nrcam_j1    | 3.20018   | 2.577           | 0          | 1         | 1         |
| Nrcam_j4    | 2.99474   | 2.63241         | 0          | 1         | 1         |
| Nrcam_j3    | 3.74284   | 4.85403         | 0          | 1         | 1         |
| XLOC_006658 | 0.140778  | 0.012215        | -3.52669   | 0.261233  | 0.610417  |
| XLOC_006658 | 0.115035  | 0.140004        | 0.283401   | 0.719941  | 1         |
| XLOC_006658 | 0.122252  | 0.0987896       | -0.307424  | 0.816828  | 1         |
| XLOC_006659 | 1.03796   | 0 -1.79769e+308 |            | 6.42E-11  | 6.80E-09  |
| G2e3_j1     | 0.248933  | 0.153987        | -0.692955  | 0.138719  | 0.463181  |
| G2e3        | 0.33659   | 0.308416        | -0.126116  | 0.709292  | 0.894155  |
| Scfd1       | 18.2459   | 17.8145         | -0.0345171 | 0.736683  | 0.907294  |
| Ap4s1       | 3.92618   | 3.84396         | 0          | 1         | 1         |
| Nubpl_j1    | 0.15431   | 0.0403289       | -1.93595   | 0.0391309 | 0.220695  |
| Arhgap5_j3  | 0.738265  | 0.125424        | -2.55733   | 2.71E-10  | 2.52E-08  |
| Akap6_j3    | 0.059367  | 0               | 0          | 1         | 1         |
| Srp54a_j3   | 17.917    | 20.8586         | 0          | 1         | 1         |
| Srp54c      | 42.5936   | 39.8028         | 0          | 1         | 1         |
| Psma6       | 71.5689   | 70.8379         | -0.0148117 | 0.867694  | 0.958158  |
| Aldoa       | 34.9173   | 35.0671         | 0.0061761  | 0.949079  | 0.985323  |
| Brms1l      | 21.0284   | 19.2697         | -0.126006  | 0.184768  | 0.525111  |
| Prps1l3     | 7.02188   | 5.61914         | -0.321508  | 0.0088436 | 0.0782138 |
| Mipol1_j1   | 1.91271   | 1.88785         | -0.0188752 | 0.901461  | 0.968727  |
| Sip1        | 1.72718   | 1.79754         | 0.0576031  | 0.778805  | 0.925532  |
| Pnn         | 15.5291   | 16.1433         | 0.055959   | 0.56186   | 0.821818  |
| Ctage5      | 10.9768   | 11.3974         | 0.0542514  | 0.655184  | 0.868251  |
| XLOC_006684 | 0.0990036 | 0.0458726       | -1.10985   | 0.341582  | 1         |
| Lrfn5       | 0.235144  | 0.475655        | 0          | 1         | 1         |
| Lrfn5_j2    | 0.18512   | 0.695828        | 0          | 1         | 1         |
| Lrfn5_j6    | 0.888705  | 0.820708        | 0          | 1         | 1         |
| Gm527_j1    | 0.259494  | 0 -1.79769e+308 |            | 1.90E-05  | 0.0005328 |
| Gm527       | 3.36591   | 3.01982         | -0.156532  | 0.36071   | 0.695583  |
| Gm527_j2    | 0.416402  | 0.402824        | -0.0478269 | 0.915804  | 0.973755  |

|                  |           |            |            |           |          |
|------------------|-----------|------------|------------|-----------|----------|
| Fam179b          | 5.65333   | 5.46342    | -0.049297  | 0.663273  | 0.872469 |
| Fam179b          | 1.5441    | 1.61088    | 0.0610771  | 0.73581   | 0.907016 |
| Fancm_j3         | 0.319112  | 0.363331   | 0.18722    | 0.53362   | 0.805224 |
| Fancm            | 0.19857   | 0.118797   | -0.741148  | 0.07149   | 0.321458 |
| 9330151L19Rik    | 2.20084   | 1.81891    | 0          | 1         | 1        |
| Klhdc1_j1        | 0.324186  | 0          | 0          | 1         | 1        |
| Klhdc1           | 2.26666   | 2.26466    | 0          | 1         | 1        |
| Klhdc2           | 22.5519   | 21.2901    | 0          | 1         | 1        |
| XLOC_006699      | 0.210763  | 0.164207   | -0.360109  | 0.758975  | 0.917041 |
| Atp5s            | 2.4247    | 2.22517    | 0          | 1         | 1        |
| Atp5s            | 1.00251   | 0.757857   | 0          | 1         | 1        |
| Atp5s_j2         | 2.77432   | 2.5831     | 0          | 1         | 1        |
| Atl1_j1          | 1.20842   | 1.28799    | 0          | 1         | 1        |
| Atl1             | 0.141974  | 0.113092   | 0          | 1         | 1        |
| Tmx1             | 19.7146   | 21.9456    | 0.154662   | 0.116645  | 0.424687 |
| Actr10           | 29.5335   | 28.3865    | -0.0571437 | 0.518236  | 0.796352 |
| Psm3_j3          | 0.171702  | 0.0239109  | -2.84416   | 0.16546   | 0.502131 |
| Psm3_j11         | 0.733783  | 0.386838   | -0.923625  | 0.265041  | 0.613897 |
| Psm3_j12         | 4.58708   | 4.12494    | -0.153202  | 0.309375  | 0.654043 |
| Arid4a           | 1.00013   | 0.863229   | 0          | 1         | 1        |
| Arid4a_j1        | 1.55078   | 0.992909   | 0          | 1         | 1        |
| 2700049A03Rik_j2 | 0.0705376 | 0          | 0          | 1         | 1        |
| 2700049A03Rik    | 0.120282  | 0.0784051  | 0          | 1         | 1        |
| Dact1            | 0.107094  | 0.00724628 | -3.8855    | 0.0973708 | 1        |
| Dact1            | 0.471979  | 0.385299   | -0.292746  | 0.435167  | 0.74606  |
| Daam1            | 7.91452   | 7.82221    | 0          | 1         | 1        |
| Daam1            | 1.33858   | 1.32228    | 0          | 1         | 1        |
| Daam1_j2         | 4.15591   | 4.55777    | 0          | 1         | 1        |
| Jkamp_j2         | 13.0365   | 20.124     | 0          | 1         | 1        |
| Jkamp            | 7.85761   | 6.70368    | 0          | 1         | 1        |
| Jkamp            | 6.05259   | 6.10495    | 0          | 1         | 1        |
| Lrrc9_j1         | 0.104636  | 0.102553   | -0.0290074 | 0.968842  | 1        |
| Lrrc9_j5         | 0.124489  | 0.0936779  | -0.410239  | 0.651484  | 1        |
| 1810048J11Rik    | 2.41617   | 1.93091    | -0.323441  | 0.282938  | 0.631512 |
| 1810048J11Rik    | 3.78083   | 3.40236    | -0.152166  | 0.259682  | 0.608462 |
| Ppm1a            | 10.4364   | 9.3644     | -0.156366  | 0.100501  | 0.392473 |
| Mnat1_j2         | 12.7487   | 12.7501    | 0          | 1         | 1        |
| Mnat1            | 1.79489   | 1.38469    | 0          | 1         | 1        |
| XLOC_006723      | 0.132655  | 0.0548427  | -1.27431   | 0.19986   | 1        |
| Prkch            | 1.20629   | 1.08807    | -0.148803  | 0.500549  | 0.785042 |
| Hif1a_j3         | 6.79045   | 7.27288    | 0          | 1         | 1        |
| Hif1a            | 2.82232   | 2.07499    | 0          | 1         | 1        |
| Hif1a_j4         | 0.268947  | 0.0116875  | 0          | 1         | 1        |
| Snapc1_j4        | 5.02482   | 6.27959    | 0          | 1         | 1        |
| Snapc1           | 3.47057   | 2.81597    | 0          | 1         | 1        |
| Snapc1_j5        | 7.9962    | 10.9619    | 0          | 1         | 1        |
| Syt16            | 0.705927  | 0.397987   | 0          | 1         | 1        |

|                  |           |                 |            |           |           |
|------------------|-----------|-----------------|------------|-----------|-----------|
| 1700086L19Rik    | 2.69163   | 2.76568         | 0.0391576  | 0.746175  | 0.911606  |
| Rhoj             | 2.02174   | 2.66737         | 0.399819   | 0.0341002 | 0.202242  |
| Syne2_j10        | 0.331157  | 0.383453        | 0.211533   | 1         | 1         |
| Syne2_j11        | 0.427927  | 0.451266        | 0.0766123  | 0.764119  | 0.919014  |
| Syne2_j13        | 0.692101  | 0.493994        | -0.486489  | 0.169721  | 0.506699  |
| Syne2_j16        | 0.9985    | 2.48708         | 1.31662    | 5.62E-07  | 2.50E-05  |
| Mthfd1           | 1.59088   | 1.37524         | 0          | 1         | 1         |
| Mthfd1_j1        | 5.06925   | 4.77271         | 0          | 1         | 1         |
| Zbtb1_j2         | 0.0496166 | 0.0978714       | 0.980065   | 0.216445  | 1         |
| Hspa2            | 7.14127   | 6.86341         | 0          | 1         | 1         |
| Gm70_j2          | 0.342019  | 0.276386        | -0.307391  | 0.623869  | 0.853084  |
| Gm10451          | 0.181856  | 0.1487          | -0.29039   | 0.670841  | 0.8755    |
| Churc1           | 13.2109   | 14.0768         | 0.0915809  | 0.532885  | 0.804635  |
| Churc1_j2        | 10.0238   | 9.67784         | -0.0506798 | 0.857285  | 0.954789  |
| Fntb             | 16.0704   | 15.6297         | -0.0401171 | 0.695124  | 0.887557  |
| Fut8             | 4.81609   | 4.12086         | 0          | 1         | 1         |
| Fut8_j1          | 0.88768   | 0.714734        | 0          | 1         | 1         |
| Fut8_j2          | 0.680762  | 1.02221         | 0          | 1         | 1         |
| Gphn             | 1.29215   | 1.33174         | 0          | 1         | 1         |
| Gphn_j4          | 2.1998    | 1.55788         | 0          | 1         | 1         |
| Mpp5             | 0.587063  | 0.524528        | 0          | 1         | 1         |
| Mpp5_j1          | 2.67465   | 1.20878         | 0          | 1         | 1         |
| Mpp5_j3          | 3.30754   | 4.27986         | 0          | 1         | 1         |
| Mpp5_j4          | 1.39966   | 0.00805664      | 0          | 1         | 1         |
| Eif2s1           | 6.43055   | 6.59371         | 0          | 1         | 1         |
| Plekhh1          | 3.872     | 4.68197         | 0          | 1         | 1         |
| Rdh12_j3         | 0.1318    | 0 -1.79769e+308 |            | 0.0083328 | 1         |
| Rdh12            | 0.497809  | 0.457415        | -0.122088  | 0.772059  | 0.922643  |
| Exd2             | 1.03129   | 0.649906        | -0.666145  | 0.0097032 | 0.0838348 |
| Exd2             | 0.438235  | 0.588981        | 0.426517   | 0.190841  | 0.533094  |
| Galnt1           | 0.211121  | 0.0553312       | 0          | 1         | 1         |
| Slc39a9          | 4.99137   | 4.04679         | 0          | 1         | 1         |
| 3830431G21Rik    | 10.3925   | 6.79368         | 0          | 1         | 1         |
| 4933426M11Rik    | 7.46353   | 6.01478         | 0          | 1         | 1         |
| 4933426M11Rik_j3 | 0.178086  | 0               | 0          | 1         | 1         |
| 4933426M11Rik_j4 | 0.254041  | 0.191239        | 0          | 1         | 1         |
| Srsf5_j8         | 1.5984    | 0.712751        | -1.16516   | 0.0026488 | 0.0312296 |
| Srsf5_j5         | 3.14118   | 3.22238         | 0.0368161  | 0.855831  | 0.95442   |
| Srsf5_j3         | 2.80881   | 3.57559         | 0.348224   | 0.0814179 | 0.347561  |
| Smoc1            | 1.46526   | 1.28621         | 0          | 1         | 1         |
| Smoc1_j5         | 1.1174    | 0.907884        | 0          | 1         | 1         |
| Smoc1_j6         | 0.872189  | 1.09203         | 0          | 1         | 1         |
| Ttc9             | 4.41039   | 3.99729         | 0          | 1         | 1         |
| Pcnx_j1          | 3.18517   | 4.41285         | 0          | 1         | 1         |
| Pcnx_j7          | 2.1482    | 3.0015          | 0          | 1         | 1         |
| Pcnx_j10         | 3.42326   | 5.99579         | 0          | 1         | 1         |
| Sipa1l1_j1       | 3.70401   | 3.29718         | -0.167858  | 0.150269  | 0.480381  |

|               |           |                       |            |           |           |
|---------------|-----------|-----------------------|------------|-----------|-----------|
| Sipa1l1_j2    | 0.0516102 | 0.0609509             | 0.239992   | 0.761397  | 1         |
| Rgs6_j6       | 2.06969   | 0.914361              | -1.17858   | 2.07E-09  | 1.65E-07  |
| Dcaf4_j2      | 0.459582  | 0.505014              | 0.136      | 0.780384  | 0.925835  |
| Dcaf4         | 9.34541   | 8.89713               | -0.0709188 | 0.570232  | 0.826188  |
| Rbm25         | 16.6779   | 16.1413               | -0.0471762 | 0.620348  | 0.851085  |
| Psen1         | 8.84073   | 8.31807               | 0          | 1         | 1         |
| Acot2         | 1.52918   | 1.5863                | 0.0529081  | 0.819443  | 0.941524  |
| Acot1         | 4.4801    | 4.49708               | 0.00545558 | 0.9731    | 0.992199  |
| Acot6         | 1.50655   | 1.66991               | 0.148525   | 0.467601  | 0.766717  |
| Dnalc1        | 2.7988    | 2.08747               | 0          | 1         | 1         |
| Zfp410_j2     | 0.170299  | 0 -1.79769e+308       |            | 1.08E-07  | 5.77E-06  |
| Zfp410_j1     | 3.49021   | 1.65594               | -1.07567   | 7.40E-11  | 7.74E-09  |
| Zfp410_j6     | 0.05319   | 0.063938              | 0.265518   | 0.857483  | 1         |
| Coq6          | 2.99277   | 2.70737               | -0.144589  | 0.346858  | 0.685763  |
| Lin52_j1      | 0.135125  | 0 -1.79769e+308       |            | 0.0066061 | 1         |
| Isca2         | 14.2338   | 10.7071               | -0.410753  | 0.0193319 | 0.137662  |
| Fcf1_j4       | 0.0814224 | 0.119117              | 0.548882   | 0.740468  | 1         |
| Fcf1_j5       | 0.326414  | 0 -1.79769e+308       |            | 0.0041807 | 0.0442779 |
| Ylpm1_j2      | 2.79461   | 2.48246               | 0          | 1         | 1         |
| Ylpm1         | 2.45142   | 2.44125               | 0          | 1         | 1         |
| XLOC_006782   | 0.225729  | 0.0719943             | 0          | 1         | 1         |
| Dlst          | 2.36661   | 2.24647               | 0          | 1         | 1         |
| Eif2b2        | 23.8608   | 24.6737               | 0.0483283  | 0.643076  | 0.862213  |
| Fam164c       | 0.564295  | 0.546701              | -0.045698  | 0.862929  | 0.956568  |
| Fos           | 2.20472   | 3.4529                | 0.647214   | 9.13E-05  | 0.0019868 |
| Jdp2          | 0.691909  | 0.488353              | -0.502657  | 0.0908739 | 0.370591  |
| Jdp2          | 0.73452   | 1.0078                | 0.456333   | 0.179002  | 0.518629  |
| Mfsd7c        | 0.145758  | 0.0493727             | -1.56179   | 0.0684747 | 0.313423  |
| Ttll5_j1      | 4.46769   | 4.80262               | 0.104294   | 0.406569  | 0.727764  |
| 1700019E19Rik | 6.76043   | 8.02786               | 0.2479     | 0.162676  | 0.498056  |
| Kiaa1152      | 0.410176  | 0.525011              | 0.356105   | 0.21562   | 0.561479  |
| 1700020O03Rik | 3.23465   | 2.90703               | -0.154067  | 0.208106  | 0.55225   |
| Esrrb         | 0.988582  | 0.197627              | -2.32258   | 1.24E-08  | 8.56E-07  |
| Vash1         | 8.15976   | 8.44324               | 0          | 1         | 1         |
| Vash1_j3      | 8.20399   | 10.1651               | 0          | 1         | 1         |
| Kiaa1737_j3   | 11.3103   | 13.2856               | 0          | 1         | 1         |
| Tmem63c       | 14.7463   | 15.0093               | 0          | 1         | 1         |
| Tmem63c_j1    | 17.7873   | 22.4509               | 0          | 1         | 1         |
| Ahsa1         | 71.1276   | 72.0218               | 0.0180249  | 0.841346  | 0.949906  |
| 1810035L17Rik | 0         | 0.388585 1.79769e+308 |            | 0.0002921 | 0.0052295 |
| Adck1         | 2.79726   | 2.61848               | 0          | 1         | 1         |
| Adck1         | 1.84246   | 2.10061               | 0          | 1         | 1         |
| Nrxn3_j2      | 0.140674  | 0.0289712             | -2.27966   | 0.168236  | 0.50494   |
| Nrxn3_j3      | 0.176125  | 3.40E-05              | -12.3382   | 0.973447  | 0.992363  |
| Nrxn3_j7      | 0.16787   | 1.66E-05              | -13.2998   | 0.980778  | 0.994152  |
| Nrxn3_j11     | 0.128495  | 0 -1.79769e+308       |            | 0.001148  | 1         |
| Nrxn3_j18     | 2.03925   | 1.70481               | 0          | 1         | 1         |

|               |           |                 |            |           |           |
|---------------|-----------|-----------------|------------|-----------|-----------|
| Nrxn3_j17     | 2.41379   | 0.971174        | 0          | 1         | 1         |
| Nrxn3_j22     | 0.712696  | 0               | 0          | 1         | 1         |
| Nrxn3_j1      | 6.68871   | 5.03035         | 0          | 1         | 1         |
| Tshr          | 0.255737  | 0.0950746       | -1.42753   | 0.011511  | 0.0950709 |
| Flrt2_j1      | 1.04707   | 1.6581          | 0          | 1         | 1         |
| Flrt2_j2      | 0.853038  | 0.821002        | 0          | 1         | 1         |
| Gpr65         | 0.426179  | 0.265739        | -0.681452  | 0.180502  | 0.520279  |
| Spata7_j2     | 1.0913    | 1.01899         | -0.0989079 | 0.756877  | 0.91616   |
| Spata7        | 4.35472   | 4.5488          | 0.0629067  | 0.695722  | 0.887811  |
| Zc3h14_j1     | 0.400615  | 0.30176         | 0          | 1         | 1         |
| Zc3h14        | 0.767975  | 0.368586        | 0          | 1         | 1         |
| Ttc8          | 3.58257   | 3.04693         | -0.233642  | 0.187248  | 0.528218  |
| Ttc8_j2       | 0.229883  | 0.324786        | 0.498589   | 0.411423  | 0.730688  |
| AK131831      | 0.235974  | 0.18299         | -0.366862  | 0.575539  | 0.828379  |
| Tdp1          | 4.40846   | 4.46128         | 0.0171813  | 0.910969  | 0.972049  |
| Kcnk13        | 0.0990929 | 0.228936        | 0          | 1         | 1         |
| Kcnk13        | 0.560512  | 0.348422        | 0          | 1         | 1         |
| Psmc1_j2      | 4.24949   | 3.46642         | 0          | 1         | 1         |
| Calm1         | 603.624   | 522.586         | -0.207982  | 0.0520973 | 0.264884  |
| AK039577_j1   | 0.378151  | 0.0724851       | -2.38321   | 0.0128771 | 0.103413  |
| AK039577_j3   | 0.0637245 | 0 -1.79769e+308 | 0.0756051  | 0.0756051 | 1         |
| 9030617003Rik | 2.67729   | 3.37687         | 0.334912   | 0.0377471 | 0.215658  |
| Cpsf2         | 9.79775   | 10.339          | 0.0775807  | 0.413918  | 0.732571  |
| Slc24a4       | 0.17885   | 0.14017         | -0.351576  | 0.390253  | 0.717195  |
| Rin3          | 0.861821  | 0.780403        | -0.143168  | 0.576357  | 0.82894   |
| Golga5        | 7.85037   | 7.93874         | 0.0161504  | 0.893527  | 0.966325  |
| Chga          | 96.685    | 78.4069         | -0.302312  | 0.0004586 | 0.0075754 |
| Chga_j1       | 0.0466709 | 0 -1.79769e+308 | 0.0723732  | 0.0723732 | 1         |
| D230037D09Rik | 1.47701   | 1.48133         | 0          | 1         | 1         |
| Ubr7          | 8.48561   | 8.22565         | -0.0448878 | 0.695358  | 0.887572  |
| Unc79_j4      | 0.237746  | 0.156171        | -0.6063    | 0.120766  | 0.432802  |
| Unc79_j1      | 0.048458  | 0 -1.79769e+308 | 0.0004072  | 0.0004072 | 1         |
| Otub2         | 1.52424   | 1.52204         | 0          | 1         | 1         |
| Ifi2711_j2    | 0.133441  | 0.17404         | 0.38322    | 0.779692  | 0.925661  |
| Ppp4r4_j1     | 0.256278  | 0.325937        | 0          | 1         | 1         |
| Ppp4r4        | 3.98702   | 3.53173         | 0          | 1         | 1         |
| Serpina3g_j3  | 15.3504   | 12.6843         | 0          | 1         | 1         |
| Serpina3n     | 39.0923   | 44.8587         | 0          | 1         | 1         |
| Glr5          | 6.56772   | 6.9479          | 0.0811843  | 0.521069  | 0.798005  |
| D430019H16Rik | 2.06636   | 2.40127         | 0.216707   | 0.172387  | 0.509909  |
| Bdkrb2        | 0.342872  | 0.499405        | 0.54254    | 0.124817  | 0.440164  |
| Bdkrb2_j2     | 1.59385   | 2.56354         | 0.68562    | 4.80E-05  | 0.0011531 |
| 4933433P14Rik | 12.6711   | 11.4023         | -0.15221   | 0.159086  | 0.493639  |
| Papola        | 13.8749   | 13.0699         | 0          | 1         | 1         |
| Vrk1          | 1.5198    | 1.54143         | 0.020387   | 0.914163  | 0.973072  |
| Vrk1          | 0.737271  | 0.713184        | -0.047921  | 0.859404  | 0.955525  |
| Vrk1_j2       | 2.29027   | 2.53477         | 0.146339   | 0.58286   | 0.832933  |



|                  |            |                 |            |           |           |
|------------------|------------|-----------------|------------|-----------|-----------|
| Gm17052          | 1.25499    | 1.37452         | 0.131253   | 0.792878  | 0.931005  |
| Ccnk_j2          | 0.00205068 | 0.127072        | 5.95339    | 0.0439934 | 1         |
| Ccnk_j4          | 0.734565   | 1.00758         | 0.455929   | 0.213835  | 0.55901   |
| Hhipl1           | 0.260163   | 0.456156        | 0          | 1         | 1         |
| Hhipl1_j2        | 0.878103   | 1.30071         | 0          | 1         | 1         |
| Cyp46a1          | 5.67909    | 4.52169         | -0.328796  | 0.0311388 | 0.190296  |
| Cyp46a1_j3       | 1.08603    | 1.49026         | 0.456495   | 0.222894  | 0.569972  |
| Eml1             | 2.95601    | 2.13893         | -0.466761  | 0.0367542 | 0.212053  |
| Eml1_j3          | 2.53306    | 2.49702         | -0.0206732 | 0.929305  | 0.978343  |
| Evl_j1           | 3.07081    | 2.31009         | -0.410669  | 0.0666898 | 0.308554  |
| Evl_j4           | 0.189145   | 0.1125          | -0.749567  | 0.596117  | 0.839228  |
| Yy1              | 8.45113    | 7.34897         | 0          | 1         | 1         |
| Yy1_j2           | 0.0629909  | 0.0470664       | 0          | 1         | 1         |
| Slc25a47_j3      | 0.103381   | 0 -1.79769e+308 | 0.0060664  |           | 1         |
| Slc25a47_j1      | 0.159539   | 0.132419        | -0.268799  | 0.73063   | 0.904795  |
| Rian_j3          | 0.164975   | 0.0769329       | 0          | 1         | 1         |
| Rian_j2          | 2.83547    | 3.05425         | 0          | 1         | 1         |
| Rian_j1          | 3.22663    | 3.25701         | 0          | 1         | 1         |
| Mirg_j10         | 0.777376   | 1.23697         | 0.67013    | 0.0169314 | 0.12535   |
| Mirg_j15         | 4.35407    | 3.98759         | -0.126847  | 0.437473  | 0.747672  |
| Ppp2r5c_j2       | 6.74999    | 5.47656         | 0          | 1         | 1         |
| Ppp2r5c_j4       | 1.10164    | 1.58069         | 0          | 1         | 1         |
| Dync1h1_j5       | 10.6575    | 8.46015         | -0.333107  | 0.0003237 | 0.0056928 |
| Dync1h1_j7       | 32.8964    | 29.0537         | -0.179208  | 0.0423147 | 0.232569  |
| Dync1h1_j11      | 13.0402    | 35.6388         | 1.45048    | 0         | 0         |
| Wdr20a_j2        | 0.0489883  | 0.0732318       | 0.580035   | 0.658072  | 1         |
| Wdr20a_j3        | 1.05058    | 0.951267        | -0.143261  | 0.614286  | 0.847685  |
| Wdr20a_j5        | 0.616908   | 0.379442        | -0.701177  | 0.219488  | 0.566015  |
| Zfp839           | 0.376449   | 0.405406        | 0.106916   | 0.774753  | 0.923737  |
| Zfp839           | 0.0530842  | 0.240974        | 2.18253    | 0.0028072 | 0.0326708 |
| Zfp839_j1        | 0.84796    | 0.542308        | -0.644883  | 0.0438365 | 0.238299  |
| Zfp839_j4        | 0.159631   | 0 -1.79769e+308 | 0.0010316  |           | 0.0146507 |
| Tecpr2           | 2.70334    | 1.70559         | 0          | 1         | 1         |
| Tecpr2_j1        | 0.805049   | 0.133392        | 0          | 1         | 1         |
| Rcor1_j2         | 0.095297   | 0               | 0          | 1         | 1         |
| Rcor1            | 2.67437    | 2.26617         | 0          | 1         | 1         |
| Traf3            | 1.18467    | 1.0512          | 0          | 1         | 1         |
| Traf3_j3         | 5.05738    | 5.352           | 0          | 1         | 1         |
| A230065H16Rik    | 0.386703   | 0.154318        | -1.32532   | 0.254423  | 0.602729  |
| A230065H16Rik_j2 | 0.355967   | 0.283131        | -0.330276  | 0.728731  | 0.903801  |
| 1200009I06Rik_j5 | 0.289603   | 0.110334        | -1.3922    | 0.146212  | 0.474483  |
| Eif5             | 13.6739    | 10.4102         | 0          | 1         | 1         |
| Eif5             | 5.26071    | 4.48123         | 0          | 1         | 1         |
| Mark3            | 3.04307    | 3.17814         | 0          | 1         | 1         |
| Trmt61a          | 0.805231   | 0.661399        | -0.283883  | 0.486799  | 0.777816  |
| Trmt61a_j1       | 0.301191   | 0.317099        | 0.0742565  | 0.814434  | 0.939438  |
| Trmt61a          | 3.40476    | 3.698           | 0.119195   | 0.461339  | 0.762597  |

|               |            |                 |            |           |           |
|---------------|------------|-----------------|------------|-----------|-----------|
| Klc1_j4       | 25.8018    | 26.3263         | 0          | 1         | 1         |
| Klc1_j6       | 10.625     | 4.35576         | 0          | 1         | 1         |
| Klc1_j11      | 211.068    | 226.087         | 0          | 1         | 1         |
| Zfyve21_j3    | 0.628334   | 0.457565        | 0          | 1         | 1         |
| Kif26a_j1     | 0.0533498  | 0 -1.79769e+308 | 0.0010296  |           | 1         |
| Kif26a_j3     | 0.155088   | 0.0832888       | -0.896889  | 0.158243  | 0.492466  |
| Inf2_j2       | 1.9734     | 2.14753         | 0          | 1         | 1         |
| Adssl1        | 0.525408   | 0.48485         | -0.1159    | 0.778236  | 0.925112  |
| Siva1         | 3.45823    | 3.06316         | -0.175016  | 0.459019  | 0.761406  |
| Zbtb42        | 0.531979   | 0.567885        | 0.0942281  | 0.775489  | 0.923807  |
| Zbtb42_j1     | 0.381264   | 0.305811        | -0.318151  | 0.46714   | 0.766568  |
| AW555464      | 14.6023    | 17.3507         | 0.248805   | 0.0065499 | 0.0625462 |
| AW555464_j5   | 16.5645    | 23.0289         | 0.47535    | 4.62E-06  | 0.0001574 |
| Pld4          | 1.26962    | 2.56603         | 1.01515    | 5.43E-06  | 0.0001817 |
| BC022687      | 3.5428     | 4.39635         | 0.311414   | 0.0348206 | 0.204924  |
| Btbd6         | 0.652451   | 0.536043        | -0.283523  | 0.207008  | 0.551484  |
| Pacs2_j2      | 27.1455    | 29.0969         | 0          | 1         | 1         |
| Mta1_j1       | 0.204556   | 0.127328        | 0          | 1         | 1         |
| Mta1_j5       | 6.25066    | 6.0835          | 0          | 1         | 1         |
| Crip2         | 56.176     | 64.0369         | 0          | 1         | 1         |
| Crip2_j3      | 199.195    | 227.088         | 0          | 1         | 1         |
| 4930427A07Rik | 0.299388   | 0.134942        | -1.14968   | 0.0361426 | 0.209915  |
| Tmem121       | 2.7947     | 2.72222         | -0.0379135 | 0.84916   | 0.952225  |
| Zfp386        | 1.454      | 1.23684         | -0.233369  | 0.362166  | 0.696475  |
| Esyt2         | 3.79573    | 3.51189         | 0          | 1         | 1         |
| Fam62b_j3     | 0.0948446  | 0.184195        | 0          | 1         | 1         |
| Ncapg2_j2     | 0.0605253  | 0 -1.79769e+308 | 0.0007425  |           | 1         |
| Ncapg2_j1     | 0.0855361  | 0.000146535     | -9.18914   | 0.710304  | 1         |
| Ptprn2_j3     | 4.21605    | 4.57344         | 0          | 1         | 1         |
| Ptprn2_j4     | 1.34637    | 1.26813         | 0          | 1         | 1         |
| Rapgef5_j1    | 9.03656    | 5.37623         | 0          | 1         | 1         |
| Cdca7l_j2     | 0.0523045  | 0 -1.79769e+308 | 0.0273946  |           | 1         |
| Cdca7l        | 0.117332   | 0.125291        | 0.0946896  | 0.897968  | 1         |
| XLOC_006917   | 0.30415    | 7.99E-06        | -15.2159   | 0.997846  | 0.999228  |
| Tmem196_j3    | 0.00428688 | 0.363362        | 6.40534    | 0.0973196 | 0.385583  |
| Tmem196_j2    | 2.19195    | 1.01519         | -1.11047   | 7.79E-05  | 0.0017344 |
| Rab10         | 56.033     | 58.7846         | 0.0691623  | 0.423652  | 0.739059  |
| BC048080      | 0.46441    | 0.41655         | -0.15691   | 0.561605  | 0.821809  |
| Efr3b_j5      | 8.4268     | 8.79531         | 0          | 1         | 1         |
| Efr3b_j6      | 1.08488    | 1.23294         | 0          | 1         | 1         |
| Efr3b         | 3.60073    | 3.39885         | 0          | 1         | 1         |
| Ncoa1_j1      | 4.16087    | 3.17805         | -0.388746  | 0.0029358 | 0.0338679 |
| Ncoa1_j3      | 2.35074    | 2.03004         | -0.21161   | 0.166187  | 0.502787  |
| Ncoa1_j4      | 0.12635    | 0 -1.79769e+308 | 6.60E-07   |           | 1         |
| XLOC_006928   | 0.120375   | 0.145677        | 0.275233   | 0.673026  | 1         |
| Fkbp1b        | 21.836     | 21.7979         | 0          | 1         | 1         |
| Ubxn2a_j5     | 0.210005   | 0               | 0          | 1         | 1         |

|             |           |                 |            |           |          |
|-------------|-----------|-----------------|------------|-----------|----------|
| Ubxn2a_j4   | 3.21503   | 4.8415          | 0          | 1         | 1        |
| Ubxn2a_j3   | 9.85832   | 7.47227         | 0          | 1         | 1        |
| Klhl29_j1   | 0.614022  | 0.000725123     | 0          | 1         | 1        |
| Klhl29      | 3.75798   | 3.40918         | 0          | 1         | 1        |
| XLOC_006934 | 0.124757  | 0.0663927       | -0.910027  | 0.431163  | 1        |
| Slc7a15_j2  | 0.0868482 | 0 -1.79769e+308 | 0.0164199  |           | 1        |
| Slc7a15_j3  | 0.0704108 | 0.0114953       | -2.61475   | 0.150933  | 1        |
| XLOC_006940 | 0.182464  | 0.0864851       | -1.07709   | 0.132753  | 0.453577 |
| Kcns3       | 12.8199   | 11.9221         | 0          | 1         | 1        |
| Vsnl1_j1    | 24.0887   | 16.1875         | 0          | 1         | 1        |
| Vsnl1       | 26.9072   | 15.1011         | 0          | 1         | 1        |
| Mycn_j1     | 0.693264  | 0.579976        | -0.257412  | 0.582801  | 0.832873 |
| Mycn        | 1.98969   | 2.56818         | 0.368201   | 0.0449221 | 0.242247 |
| Ddx1        | 12.2447   | 12.2825         | 0          | 1         | 1        |
| Fam84a      | 0.141208  | 0.107615        | -0.391948  | 0.672443  | 0.876277 |
| Trib2       | 14.0052   | 8.50754         | 0          | 1         | 1        |
| Trib2_j1    | 20.5323   | 16.488          | 0          | 1         | 1        |
| Trib2_j2    | 1.85982   | 3.04232         | 0          | 1         | 1        |
| Lpin1_j3    | 16.9784   | 15.5446         | 0          | 1         | 1        |
| Lpin1       | 15.6492   | 12.9622         | 0          | 1         | 1        |
| Lpin1_j6    | 0.809001  | 0               | 0          | 1         | 1        |
| Greb1_j9    | 0.107083  | 9.57E-05        | -10.1275   | 0.74658   | 1        |
| Greb1_j10   | 0.19442   | 0.164839        | -0.238117  | 0.557274  | 0.819539 |
| Pqlc3       | 8.25132   | 8.27638         | 0.00437414 | 0.966767  | 0.990488 |
| Kcnf1       | 1.1389    | 0.968966        | -0.233125  | 0.204606  | 0.548782 |
| AK148766_j1 | 0.107365  | 0.106266        | -0.0148504 | 0.992389  | 1        |
| Itgb1bp1    | 4.71825   | 4.87866         | 0.048232   | 0.694455  | 0.88733  |
| Ywhaq_j4    | 0.545352  | 0.518659        | -0.0724021 | 0.836814  | 0.947789 |
| AK020054_j1 | 0.25734   | 0.428998        | 0.737298   | 0.448076  | 0.754671 |
| XLOC_006971 | 0.364172  | 0.529247        | 0.539322   | 0.168111  | 0.5048   |
| Gm16372     | 3.05908   | 3.50889         | 0.197918   | 0.438597  | 0.748203 |
| Cys1_j2     | 1.05884   | 0.778061        | -0.444531  | 0.114592  | 0.421224 |
| Id2         | 12.362    | 10.2227         | -0.274132  | 0.0455128 | 0.24425  |
| Rnf144a_j3  | 0.4034    | 0.302449        | 0          | 1         | 1        |
| Rnf144a     | 2.48669   | 2.15119         | 0          | 1         | 1        |
| Rsad2       | 1.60633   | 1.60804         | 0.00153684 | 0.993736  | 0.998222 |
| AK163447_j5 | 0.628007  | 0.933991        | 0.572627   | 0.0812585 | 0.347085 |
| AK163447_j2 | 0.0169232 | 0.109391        | 2.69242    | 0.0140798 | 1        |
| Colec11_j1  | 0.0989821 | 0 -1.79769e+308 | 0.0411777  |           | 1        |
| Ttc15       | 6.35673   | 5.50429         | 0          | 1         | 1        |
| Ttc15       | 13.0459   | 12.8092         | 0          | 1         | 1        |
| Dld         | 55.8605   | 48.1829         | -0.213306  | 0.017257  | 0.1271   |
| Cbll1       | 0.390255  | 0.738989        | 0          | 1         | 1        |
| Cbll1_j2    | 1.09933   | 0.797532        | 0          | 1         | 1        |
| Bcap29      | 23.4371   | 21.7734         | -0.106232  | 0.314378  | 0.658584 |
| Bcap29      | 1.93323   | 2.08644         | 0.110035   | 0.664506  | 0.872968 |
| Gpr22       | 2.62228   | 2.01486         | 0          | 1         | 1        |

|                  |           |           |              |           |           |
|------------------|-----------|-----------|--------------|-----------|-----------|
| Hbp1             | 12.1243   | 11.6368   | 0            | 1         | 1         |
| Prkar2b          | 45.3816   | 33.6511   | 0            | 1         | 1         |
| Prkar2b_j4       | 0.516553  | 0.572951  | 0            | 1         | 1         |
| F730043M19Rik_j5 | 0.597118  | 0.317553  | -0.91102     | 0.0339525 | 0.20174   |
| F730043M19Rik_j6 | 1.39439   | 0.736269  | -0.921327    | 0.014842  | 0.114021  |
| Hdac9_j3         | 0.548959  | 0.235993  | 0            | 1         | 1         |
| Hdac9_j6         | 0.0810898 | 0.095122  | 0            | 1         | 1         |
| Hdac9_j12        | 2.12905   | 1.46472   | 0            | 1         | 1         |
| Ahr              | 0.552915  | 0.723227  | 0            | 1         | 1         |
| Tspan13_j3       | 4.69404   | 5.12949   | 0            | 1         | 1         |
| Tspan13          | 47.9033   | 44.0272   | 0            | 1         | 1         |
| Bzw2             | 1.60348   | 1.82504   | 0            | 1         | 1         |
| Arl4a            | 4.48329   | 4.26373   | 0            | 1         | 1         |
| Arl4a            | 2.02911   | 2.24628   | 0            | 1         | 1         |
| Scin             | 2.94006   | 2.31186   | -0.346795    | 0.0288358 | 0.180772  |
| Gm889_j1         | 0.107178  | 0.0338089 | -1.66453     | 0.340908  | 1         |
| Ifrd1            | 0.564858  | 0.562927  | -0.00494003  | 0.987488  | 0.996374  |
| Zfp277           | 4.4568    | 4.66644   | 0.0663147    | 0.647926  | 0.864358  |
| Lrrn3            | 10.4612   | 9.0672    | -0.206326    | 0.0512077 | 0.262124  |
| Dnajb9           | 18.4915   | 14.4912   | -0.351686    | 0.001022  | 0.0145445 |
| Stxbp6_j4        | 1.98832   | 0.567951  | 0            | 1         | 1         |
| Stxbp6           | 0.707411  | 0.303983  | 0            | 1         | 1         |
| Nova1            | 0.693834  | 0.743803  | 0.100329     | 0.705938  | 0.892502  |
| Prkd1            | 5.09078   | 4.61211   | -0.14246     | 0.263665  | 0.612457  |
| Strn3            | 2.23465   | 2.2339    | 0            | 1         | 1         |
| Hectd1_j10       | 0.451346  | 0.343838  | 0            | 1         | 1         |
| Hectd1_j12       | 0.10043   | 0.678793  | 0            | 1         | 1         |
| Heatr5a_j1       | 7.17986   | 5.08238   | -0.498453    | 0.0014272 | 0.0189862 |
| Heatr5a_j3       | 1.39355   | 0.155254  | -3.16606     | 4.76E-09  | 3.55E-07  |
| Heatr5a_j7       | 3.32832   | 1.91401   | -0.7982      | 1.46E-08  | 9.91E-07  |
| 6530401N04Rik    | 1.6285    | 1.31242   | -0.311309    | 0.355614  | 0.691525  |
| 6530401N04Rik    | 2.85619   | 3.19191   | 0.160324     | 0.487668  | 0.77841   |
| 6530401N04Rik_j2 | 2.22136   | 1.68777   | -0.396321    | 0.123316  | 0.43723   |
| Egln3            | 1.64825   | 0.946957  | -0.79956     | 0.001288  | 0.0175069 |
| 1110002B05Rik    | 16.8129   | 16.8774   | 0.00552504   | 0.965322  | 0.990054  |
| Eapp             | 8.10409   | 8.68315   | 0.0995689    | 0.392402  | 0.718659  |
| Gm16382          | 0.886572  | 0.837713  | -0.0817831   | 0.877074  | 0.96086   |
| Snx6_j1          | 4.79897   | 5.96432   | 0            | 1         | 1         |
| Snx6             | 15.4715   | 12.7193   | 0            | 1         | 1         |
| Cfl2             | 32.4786   | 30.3313   | 0            | 1         | 1         |
| Baz1a_j5         | 0.279454  | 0.277891  | -0.0080886   | 0.98771   | 0.996374  |
| Baz1a_j10        | 0.27066   | 0.136162  | -0.991151    | 0.0671285 | 0.309734  |
| Nfkbia           | 6.58994   | 7.92741   | 0.266584     | 0.0588649 | 0.285245  |
| Ralgapa1_j1      | 0.272314  | 0.0946233 | -1.525       | 0.000229  | 0.0042901 |
| Ralgapa1_j13     | 7.52424   | 5.81539   | -0.371669    | 0.0008753 | 0.012851  |
| Mbip_j1          | 0         | 0.092031  | 1.79769e+308 | 0.0945845 | 1         |
| Mbip             | 4.56951   | 4.07669   | -0.164643    | 0.35784   | 0.693652  |

|                   |           |                 |            |           |           |
|-------------------|-----------|-----------------|------------|-----------|-----------|
| Sec23a_j1         | 3.99192   | 2.64336         | 0          | 1         | 1         |
| Sec23a            | 29.3988   | 25.2735         | 0          | 1         | 1         |
| Trappc6b          | 20.0449   | 20.3774         | 0.0237359  | 0.844845  | 0.950919  |
| Fbxo33_j1         | 4.75118   | 4.57351         | -0.054985  | 0.705538  | 0.892269  |
| Fbxo33            | 1.24152   | 1.07617         | -0.206203  | 0.362063  | 0.69637   |
| AK043502_j1       | 0.129353  | 0.384229        | 1.57066    | 0.0012351 | 0.0169148 |
| AK043502          | 0.166655  | 0.251597        | 0.594248   | 0.336535  | 0.676991  |
| Klhl28            | 2.33025   | 2.21339         | -0.0742291 | 0.583827  | 0.83315   |
| Fkbp3             | 54.6907   | 46.1609         | 0          | 1         | 1         |
| Mdga2             | 0.16568   | 0.0558949       | -1.56761   | 0.0793758 | 0.342111  |
| 1110034A24Rik_j1  | 20.7074   | 23.2089         | 0          | 1         | 1         |
| Rpl36al           | 3.13598   | 3.7004          | 0          | 1         | 1         |
| 1110034A24Rik     | 1.59448   | 1.56929         | 0          | 1         | 1         |
| Pole2_j5          | 0.189991  | 0.0778369       | 0          | 1         | 1         |
| Sdccag1_j4        | 0.263232  | 0.158924        | 0          | 1         | 1         |
| Gm71              | 3.3263    | 3.28761         | -0.0168778 | 0.925841  | 0.976962  |
| Gm71_j1           | 0.304203  | 0.150811        | -1.01229   | 0.124124  | 0.439089  |
| Gm71_j5           | 2.28349   | 1.72696         | -0.40301   | 0.211407  | 0.556171  |
| Gm71_j6           | 1.01253   | 0.862668        | -0.231093  | 0.622421  | 0.852322  |
| Sos2_j1           | 4.26054   | 4.54767         | 0.0940916  | 0.429941  | 0.743005  |
| L2hgdh_j4         | 0.231161  | 0.409102        | 0.823559   | 0.362193  | 0.6965    |
| Cdkl1_j4          | 1.08818   | 0.691413        | -0.654305  | 0.0454115 | 0.243949  |
| mKIAA1565_j1      | 0.818943  | 0.782851        | -0.0650259 | 0.777001  | 0.924635  |
| mKIAA1565_j3      | 0.0507761 | 0 -1.79769e+308 | 0.0003963  |           | 1         |
| mKIAA1565_j4      | 0.0718857 | 0.0249807       | -1.52489   | 0.106212  | 1         |
| Pygl              | 7.43924   | 6.95709         | -0.096671  | 0.413313  | 0.732136  |
| Trim9_j1          | 1.02264   | 0.815266        | 0          | 1         | 1         |
| Trim9_j6          | 0.0548393 | 0.534438        | 0          | 1         | 1         |
| Trim9_j8          | 4.91851   | 5.19834         | 0          | 1         | 1         |
| AK014224          | 1.465     | 1.43126         | 0          | 1         | 1         |
| Timm9_j2          | 0.848327  | 0.567479        | -0.580054  | 0.323267  | 0.666236  |
| Timm9             | 1.83553   | 1.8065          | -0.023     | 0.940762  | 0.982026  |
| 2810055F11Rik     | 0.0612777 | 0 -1.79769e+308 | 0.0085158  |           | 1         |
| Rtn1              | 59.8602   | 72.1173         | 0          | 1         | 1         |
| Rtn1_j2           | 71.3054   | 36.5931         | 0          | 1         | 1         |
| Rtn1              | 19.5919   | 17.4302         | 0          | 1         | 1         |
| Dhrs7             | 22.7508   | 21.2773         | -0.0966038 | 0.37588   | 0.708088  |
| 4930447C04Rik_j2  | 0.404048  | 0.37589         | -0.104216  | 0.801365  | 0.933802  |
| 4930447C04Rik_j17 | 1.14862   | 1.11987         | -0.0365795 | 0.910175  | 0.971586  |
| Six1              | 5.45736   | 5.94641         | 0.123814   | 0.247109  | 0.594664  |
| Six4_j1           | 7.96546   | 5.30901         | 0          | 1         | 1         |
| Trmt5_j6          | 4.75414   | 4.77815         | 0.00726887 | 0.964775  | 0.990042  |
| Trmt5             | 0.452601  | 0.464922        | 0.0387468  | 0.890945  | 0.965547  |
| Tmem30b           | 0.644302  | 0.703708        | 0.127239   | 0.571879  | 0.827089  |
| Kcnh5             | 1.37815   | 0.775132        | -0.830216  | 3.16E-08  | 1.97E-06  |
| Ppp2r5e           | 13.8269   | 13.2155         | -0.0652512 | 0.478276  | 0.772906  |
| Wdr89_j1          | 33.2684   | 39.8783         | 0.26145    | 0.0035729 | 0.039578  |

|                  |           |           |            |           |           |
|------------------|-----------|-----------|------------|-----------|-----------|
| Wdr89            | 0.717075  | 1.41659   | 0.982229   | 0.0013334 | 0.0180186 |
| Sgpp1            | 11.507    | 9.31632   | 0          | 1         | 1         |
| Sgpp1_j2         | 0.456369  | 0.254415  | 0          | 1         | 1         |
| XLOC_007078      | 0.382552  | 0.190436  | -1.00635   | 0.206173  | 0.55068   |
| Spnb1_j1         | 1.85366   | 1.3933    | 0          | 1         | 1         |
| Spnb1            | 4.81022   | 3.08336   | 0          | 1         | 1         |
| Rab15_j2         | 0.627669  | 1.23769   | 0          | 1         | 1         |
| Rab15_j1         | 42.6172   | 41.2043   | 0          | 1         | 1         |
| Rab15_j4         | 1.26898   | 0.630617  | 0          | 1         | 1         |
| Rab15            | 22.6208   | 20.8324   | 0          | 1         | 1         |
| Max              | 6.81801   | 6.82596   | 0          | 1         | 1         |
| Atp6v1d_j4       | 0.527581  | 0.383383  | 0          | 1         | 1         |
| Atp6v1d_j2       | 26.1002   | 22.8674   | 0          | 1         | 1         |
| Plek2            | 1.1306    | 0.914597  | -0.305883  | 0.355067  | 0.691033  |
| Plek2_j1         | 2.06029   | 2.07127   | 0.00767138 | 0.973872  | 0.992504  |
| Tmem229b_j1      | 0.315054  | 0.324229  | 0          | 1         | 1         |
| Tmem229b_j4      | 1.55072   | 0         | 0          | 1         | 1         |
| Tmem229b         | 3.60428   | 3.35446   | 0          | 1         | 1         |
| Pigh             | 2.12805   | 1.94391   | 0          | 1         | 1         |
| Vti1b_j4         | 0         | 2.67478   | 0          | 1         | 1         |
| Vti1b_j6         | 39.386    | 41.4276   | 0          | 1         | 1         |
| Rdh11            | 15.277    | 16.155    | 0          | 1         | 1         |
| Zfyve26          | 0.989718  | 0.719411  | 0          | 1         | 1         |
| Zfp36l1          | 8.06403   | 9.05307   | 0.166907   | 0.143753  | 0.470722  |
| 2310015A10Rik    | 3.11242   | 2.78605   | -0.159815  | 0.23137   | 0.578474  |
| Actn1_j7         | 0.431516  | 0.12945   | 0          | 1         | 1         |
| Actn1_j8         | 0.0708652 | 0         | 0          | 1         | 1         |
| Actn1_j9         | 2.29362   | 1.68611   | 0          | 1         | 1         |
| Dcaf5_j2         | 2.24969   | 0.713001  | 0          | 1         | 1         |
| Erh_j1           | 0.552974  | 0.181038  | 0          | 1         | 1         |
| Gm1568           | 0.187786  | 0.120037  | -0.645619  | 0.283523  | 0.631899  |
| AK145430_j1      | 0.0958444 | 0.0792107 | -0.274997  | 0.867407  | 1         |
| Cox16            | 35.311    | 36.3582   | 0.0421633  | 0.736944  | 0.907442  |
| Synj2bp          | 18.2158   | 18.3448   | 0.0101825  | 0.949957  | 0.985532  |
| Synj2bp          | 13.2438   | 11.7496   | -0.172701  | 0.268129  | 0.616844  |
| Med6_j7          | 1.03282   | 2.62727   | 0          | 1         | 1         |
| Med6_j8          | 0.0727153 | 0.115072  | 0          | 1         | 1         |
| Map3k9_j2        | 5.52667   | 4.24629   | 0          | 1         | 1         |
| XLOC_007106      | 0.31073   | 0.367823  | 0.243351   | 0.713785  | 0.896213  |
| XLOC_007106      | 0.291917  | 0.55386   | 0.923963   | 0.228123  | 0.575164  |
| XLOC_007106      | 0.17762   | 0.247518  | 0.478742   | 0.650081  | 0.865631  |
| Dpf3_j2          | 0.189913  | 0.262814  | 0.4687     | 0.596833  | 0.839798  |
| Zfyve1           | 7.17818   | 5.98944   | 0          | 1         | 1         |
| Numb             | 2.30199   | 1.86946   | 0          | 1         | 1         |
| Numb_j1          | 0.245251  | 0.174012  | 0          | 1         | 1         |
| C130039O16Rik_j1 | 0.0503021 | 0.021481  | 0          | 1         | 1         |
| C130039O16Rik    | 0.532509  | 0.576742  | 0          | 1         | 1         |

|                  |           |                 |            |           |           |
|------------------|-----------|-----------------|------------|-----------|-----------|
| Gm5436           | 111.596   | 113.025         | 0.0183545  | 0.843028  | 0.950311  |
| Fam161b_j1       | 1.15307   | 0.885296        | -0.381246  | 0.12124   | 0.43358   |
| Fam161b          | 0.642649  | 0.469725        | -0.452217  | 0.0216868 | 0.148971  |
| Entpd5           | 1.66575   | 1.92577         | 0.209266   | 0.270193  | 0.619387  |
| Aldh6a1          | 9.35344   | 6.12256         | 0          | 1         | 1         |
| Abcd4_j1         | 2.21377   | 2.14646         | 0          | 1         | 1         |
| Abcd4            | 3.43007   | 3.61609         | 0          | 1         | 1         |
| Tmem90a          | 1.88274   | 1.37479         | 0          | 1         | 1         |
| Npc2             | 21.2059   | 23.1477         | 0.126399   | 0.183962  | 0.524679  |
| Ltbp2_j6         | 0.080859  | 0 -1.79769e+308 |            | 0.0017443 | 1         |
| 1110018G07Rik_j8 | 0.0847394 | 0               | 0          | 1         | 1         |
| 1110018G07Rik    | 5.7921    | 3.98121         | 0          | 1         | 1         |
| Rps6kl1_j1       | 0.025422  | 0.10821         | 0          | 1         | 1         |
| Rps6kl1          | 2.37264   | 2.40788         | 0          | 1         | 1         |
| Pgf              | 2.95266   | 2.02448         | -0.544464  | 0.0240515 | 0.159943  |
| Mlh3             | 1.86635   | 1.39485         | 0          | 1         | 1         |
| Acyp1            | 14.3299   | 13.4148         | -0.0952028 | 0.634567  | 0.858242  |
| Acyp1_j1         | 4.42415   | 2.88481         | -0.616924  | 0.0483499 | 0.252957  |
| Nek9_j2          | 0.073     | 0.0395841       | 0          | 1         | 1         |
| Nek9             | 8.05876   | 6.4584          | 0          | 1         | 1         |
| Tmed10_j2        | 0.335702  | 0               | 0          | 1         | 1         |
| 0610007P14Rik    | 7.03607   | 7.77083         | 0.1433     | 0.312918  | 0.657313  |
| Tgfb3_j2         | 0.853113  | 0.560817        | -0.605208  | 0.15796   | 0.49215   |
| Tgfb3            | 4.66034   | 4.41632         | -0.0775918 | 0.568426  | 0.825535  |
| Angel1_j1        | 9.98888   | 9.16849         | 0          | 1         | 1         |
| Angel1           | 16.208    | 12.0021         | 0          | 1         | 1         |
| Zdhhc22_j1       | 9.47407   | 6.61896         | -0.517381  | 9.10E-06  | 0.0002858 |
| Zdhhc22_j2       | 0.309575  | 0.092394        | -1.74442   | 0.0161436 | 0.121174  |
| Ngb              | 1.79311   | 1.57673         | -0.18553   | 0.419336  | 0.736057  |
| Pomt2            | 3.67008   | 3.35459         | 0          | 1         | 1         |
| Tmed8            | 0.917872  | 0.812984        | 0          | 1         | 1         |
| Vipar_j1         | 0.515623  | 0.824247        | 0.676759   | 0.0188678 | 0.135499  |
| Vipar_j4         | 10.0922   | 9.33821         | -0.112023  | 0.298327  | 0.644922  |
| Ism2_j6          | 0.165357  | 0.0861344       | -0.940923  | 0.311104  | 0.655898  |
| Ism2             | 0.10839   | 0.0516182       | -1.07029   | 0.281204  | 1         |
| Ism2_j8          | 0.147304  | 0.123241        | -0.257315  | 0.758799  | 0.917041  |
| Sptlc2           | 9.53199   | 9.94696         | 0.0614772  | 0.514834  | 0.793837  |
| Snw1             | 17.4274   | 19.0772         | 0.130488   | 0.206325  | 0.550784  |
| XLOC_007151      | 0.162159  | 0.00614107      | -4.72277   | 0.377445  | 0.70922   |
| XLOC_007151      | 0.0810188 | 0.0997979       | 0.300754   | 0.689344  | 1         |
| 4930534B04Rik    | 0.387733  | 0.375366        | -0.0467678 | 0.875537  | 0.960411  |
| Gtf2a1_j4        | 0.0469383 | 0               | 0          | 1         | 1         |
| Gtf2a1           | 1.055     | 0.00876808      | 0          | 1         | 1         |
| Ston2_j2         | 0.782302  | 0.58434         | 0          | 1         | 1         |
| Ston2_j5         | 0.229206  | 0.182929        | 0          | 1         | 1         |
| Sel1l            | 3.28476   | 3.53191         | 0          | 1         | 1         |
| Sel1l            | 9.78052   | 7.59671         | 0          | 1         | 1         |

|                  |           |                 |            |           |           |
|------------------|-----------|-----------------|------------|-----------|-----------|
| Gm6863           | 132.919   | 149.987         | 0.174292   | 0.0491865 | 0.255633  |
| Galc_j1          | 2.44642   | 2.68762         | 0          | 1         | 1         |
| Galc             | 4.38396   | 3.94716         | 0          | 1         | 1         |
| Kcnk10_j3        | 0.137226  | 0.568993        | 0          | 1         | 1         |
| Kcnk10           | 0.727855  | 0.212983        | 0          | 1         | 1         |
| Ptpn21_j3        | 0.0776877 | 0               | 0          | 1         | 1         |
| Ptpn21_j2        | 0.39747   | 0               | 0          | 1         | 1         |
| Ptpn21           | 0.158816  | 0.282302        | 0          | 1         | 1         |
| Foxn3_j2         | 2.56577   | 2.02562         | 0          | 1         | 1         |
| BC002230_j1      | 2.26833   | 2.59251         | 0.192722   | 0.219535  | 0.566048  |
| Ttc7b_j2         | 0.62368   | 0.442643        | 0          | 1         | 1         |
| Ttc7b_j8         | 0.896039  | 0.933205        | 0          | 1         | 1         |
| Ttc7b            | 11.1612   | 10.3704         | 0          | 1         | 1         |
| Rps6ka5          | 2.02795   | 1.56895         | 0          | 1         | 1         |
| Gpr68            | 0.396189  | 0.354022        | -0.162349  | 0.665273  | 0.873092  |
| Smek1_j1         | 2.64812   | 2.74567         | 0.0521884  | 0.806122  | 0.935898  |
| Smek1            | 0.230166  | 0.251097        | 0.125569   | 0.737387  | 0.907492  |
| Fbln5_j2         | 0.565284  | 0.0895732       | 0          | 1         | 1         |
| Fbln5            | 13.0599   | 12.5001         | 0          | 1         | 1         |
| Trip11           | 0.396992  | 0.367701        | -0.110578  | 0.651265  | 0.866096  |
| Trip11_j1        | 0.252029  | 0 -1.79769e+308 |            | 2.09E-16  | 5.19E-14  |
| Atxn3_j4         | 0.101486  | 0.101745        | 0          | 1         | 1         |
| Atxn3            | 3.09322   | 2.93556         | 0          | 1         | 1         |
| Lgmn_j1          | 112.188   | 96.7648         | 0          | 1         | 1         |
| Lgmn             | 66.6115   | 55.9361         | 0          | 1         | 1         |
| Itpk1_j4         | 0.181127  | 0.141238        | 0          | 1         | 1         |
| Itpk1            | 17.8642   | 20.7651         | 0          | 1         | 1         |
| Moap1            | 6.44166   | 5.71331         | 0          | 1         | 1         |
| Moap1            | 5.4485    | 4.55653         | 0          | 1         | 1         |
| Btbd7            | 2.11411   | 2.11667         | 0          | 1         | 1         |
| Prima1           | 0.879693  | 0.487683        | 0          | 1         | 1         |
| Prima1_j2        | 1.46045   | 1.14062         | 0          | 1         | 1         |
| Asb2             | 0.682647  | 0.121073        | -2.49526   | 0.0002498 | 0.0046197 |
| Ddx24            | 42.9116   | 38.2042         | 0          | 1         | 1         |
| Ifi27l2a         | 0.411516  | 0.390148        | -0.0769257 | 0.929445  | 0.978343  |
| Ifi27l2a_j1      | 4.64202   | 3.68904         | -0.331509  | 0.405674  | 0.727324  |
| Serpina10_j1     | 0.175872  | 0.261508        | 0.572333   | 0.466735  | 0.766324  |
| Serpina1e_j1     | 3.59388   | 2.57323         | -0.48196   | 0.0095777 | 0.0829711 |
| Serpina11_j2     | 1.4836    | 1.63026         | 0.136005   | 0.768503  | 0.921133  |
| Dicer1_j2        | 0.326659  | 0.0992998       | 0          | 1         | 1         |
| Dicer1_j1        | 1.13579   | 0.846255        | 0          | 1         | 1         |
| 4831426l19Rik_j3 | 0.393187  | 0.271737        | 0          | 1         | 1         |
| Snhg10           | 1.52691   | 1.67865         | 0.136681   | 0.727149  | 0.903357  |
| Atg2b_j2         | 3.18642   | 2.79043         | -0.191446  | 0.0969053 | 0.384567  |
| XLOC_007201      | 0.117135  | 0.05826         | -1.0076    | 0.461836  | 1         |
| XLOC_007201      | 0.0500403 | 0 -1.79769e+308 |            | 0.0653309 | 1         |
| XLOC_007201      | 0.150754  | 0.118661        | -0.345348  | 0.799709  | 0.933125  |



|               |           |                 |           |           |           |
|---------------|-----------|-----------------|-----------|-----------|-----------|
| XLOC_007201   | 0.144292  | 0.0538142       | -1.42293  | 0.547169  | 0.813492  |
| Bcl11b_j4     | 0.62417   | 0.487339        | 0         | 1         | 1         |
| Bcl11b        | 0.811792  | 0.745203        | 0         | 1         | 1         |
| Setd3_j7      | 18.248    | 24.0498         | 0         | 1         | 1         |
| Setd3_j8      | 1.17785   | 3.46224         | 0         | 1         | 1         |
| Setd3_j6      | 3.96505   | 1.00949         | 0         | 1         | 1         |
| Ccdc85c_j1    | 0.107486  | 0.0886967       | -0.2772   | 0.563074  | 1         |
| Ccdc85c       | 0.676375  | 0.729444        | 0.108974  | 0.543073  | 0.810717  |
| Slc25a29      | 0.65181   | 0.577651        | -0.174255 | 0.547975  | 0.813959  |
| Wars          | 8.62995   | 10.7325         | 0.314563  | 0.0161615 | 0.12129   |
| Wars          | 43.2813   | 51.9031         | 0.262078  | 0.0030609 | 0.0349964 |
| Begain_j3     | 0.666503  | 0.384747        | -0.792703 | 0.0634759 | 0.298841  |
| Begain        | 1.77898   | 2.21219         | 0.314423  | 0.129472  | 0.448434  |
| Hsp90aa1_j7   | 284.276   | 338.418         | 0         | 1         | 1         |
| Hsp90aa1_j9   | 11.7771   | 21.8406         | 0         | 1         | 1         |
| Stk30_j14     | 0.0615398 | 0 -1.79769e+308 |           | 0.0914482 | 1         |
| Stk30_j15     | 0.14341   | 0.000863066     | -7.37645  | 0.748371  | 0.912414  |
| Stk30_j4      | 0.0793239 | 0.0851101       | 0.101574  | 0.932053  | 1         |
| Stk30_j2      | 0.0603051 | 0 -1.79769e+308 |           | 0.0658079 | 1         |
| Cinp          | 9.68356   | 10.8127         | 0         | 1         | 1         |
| Cdc42bpb_j4   | 13.3699   | 15.1467         | 0         | 1         | 1         |
| AK080484_j3   | 0.186694  | 0.0504393       | -1.88805  | 0.289822  | 0.637163  |
| AK012841      | 0.39585   | 0.390183        | 0         | 1         | 1         |
| Ckb           | 140.684   | 117.66          | 0         | 1         | 1         |
| Ckb_j4        | 162.561   | 164.109         | 0         | 1         | 1         |
| Ppp1r13b_j3   | 0.135492  | 0.00141306      | 0         | 1         | 1         |
| Ppp1r13b      | 7.38294   | 6.1641          | 0         | 1         | 1         |
| 2010107E04Rik | 100.924   | 92.4875         | -0.125943 | 0.242627  | 0.590089  |
| Tmem179       | 17.0219   | 17.2303         | 0         | 1         | 1         |
| Tmem179_j5    | 6.87214   | 7.19865         | 0         | 1         | 1         |
| Akt1          | 91.5999   | 105.049         | 0.197638  | 0.0213005 | 0.147081  |
| XLOC_007233   | 0.123215  | 0.169988        | 0.464247  | 0.44323   | 0.751213  |
| Ahnak2_j1     | 24.9123   | 25.4176         | 0         | 1         | 1         |
| Cdca4         | 0.529042  | 0.85392         | 0         | 1         | 1         |
| Cdca4         | 1.00318   | 0.950041        | 0         | 1         | 1         |
| Jag2_j1       | 9.51009   | 8.9031          | 0         | 1         | 1         |
| Jag2_j5       | 9.13623   | 7.25748         | 0         | 1         | 1         |
| Nudt14        | 7.17194   | 6.55797         | -0.129116 | 0.433107  | 0.744598  |
| Brf1_j2       | 0.434731  | 0.452026        | 0.0562827 | 0.857369  | 0.954789  |
| Brf1          | 3.95714   | 4.08851         | 0.0471143 | 0.669417  | 0.874823  |
| Ighg_j2       | 0.419959  | 0.284659        | 0         | 1         | 1         |
| abParts_j5    | 1.1101    | 1.0697          | 0         | 1         | 1         |
| abParts_j11   | 3.32612   | 3.47861         | 0         | 1         | 1         |
| abParts_j15   | 0.625994  | 0.00957531      | 0         | 1         | 1         |
| Wdr60_j1      | 0.795101  | 0.746639        | 0         | 1         | 1         |
| Wdr60_j4      | 0.605368  | 0.160297        | 0         | 1         | 1         |
| Wdr60         | 0.615313  | 0.626376        | 0         | 1         | 1         |

|                  |            |           |              |          |           |
|------------------|------------|-----------|--------------|----------|-----------|
| Wdr60_j5         | 0.822929   | 0.762     | 0            | 1        | 1         |
| D430020J02Rik_j1 | 0.24936    | 0.205684  | -0.277804    | 0.348521 | 0.686685  |
| Sp4_j2           | 1.03409    | 0.315541  | 0            | 1        | 1         |
| Itgb8            | 6.7371     | 4.76135   | 0            | 1        | 1         |
| Kif3c            | 11.8181    | 13.9455   | 0            | 1        | 1         |
| Dtnb_j10         | 2.15431    | 2.11692   | -0.0252614   | 0.917993 | 0.974435  |
| XLOC_006542      | 1.32595    | 1.29526   | -0.0337839   | 0.91392  | 0.972962  |
| Dnmt3a_j3        | 0.223129   | 0.294543  | 0            | 1        | 1         |
| Dnmt3a_j9        | 0.186367   | 0.178751  | 0            | 1        | 1         |
| Dnmt3a_j10       | 1.09388    | 1.18204   | 0            | 1        | 1         |
| Dnajc27_j5       | 0.00177415 | 1.52458   | 0            | 1        | 1         |
| Adcy3_j2         | 0.971141   | 0.784011  | 0            | 1        | 1         |
| Adcy3_j4         | 2.2965     | 2.82421   | 0            | 1        | 1         |
| XLOC_006548      | 0.424639   | 0.307275  | -0.46671     | 0.45885  | 0.761335  |
| Its2             | 12.228     | 12.9      | 0.0771898    | 0.580277 | 0.831506  |
| Pfn4_j1          | 0.345808   | 0.561516  | 0.699354     | 0.19125  | 0.533454  |
| Pfn4             | 0.257962   | 0.25616   | -0.0101113   | 0.987483 | 0.996374  |
| Pfn4             | 0.375805   | 0.447051  | 0.250458     | 0.574979 | 0.828142  |
| O610009D07Rik    | 24.1104    | 25.001    | 0.0523256    | 0.642869 | 0.862213  |
| Atad2b_j5        | 0          | 0.0718352 | 0            | 1        | 1         |
| Atad2b_j6        | 0          | 0.0933344 | 0            | 1        | 1         |
| Hs1bp3_j3        | 2.99692    | 2.88386   | 0            | 1        | 1         |
| AK050516_j4      | 0.84417    | 0.558271  | -0.596567    | 0.190989 | 0.533209  |
| Pum2_j8          | 0.12347    | 0.108274  | 0            | 1        | 1         |
| Pum2             | 1.44697    | 0.862749  | 0            | 1        | 1         |
| Sdc1_j3          | 0.223595   | 1.12576   | 2.33195      | 1.11E-07 | 5.87E-06  |
| Sdc1_j5          | 0          | 0.595936  | 1.79769e+308 | 6.17E-06 | 0.0002033 |
| Laptm4a_j1       | 9.09536    | 9.81355   | 0.109644     | 0.49871  | 0.78413   |
| Laptm4a_j4       | 17.8459    | 6.23856   | -1.5163      | 4.42E-09 | 3.31E-07  |
| Ttc32_j1         | 0.0815225  | 0.0879772 | 0.109931     | 0.898452 | 1         |
| Rdh14_j1         | 10.6957    | 11.5657   | 0.11283      | 0.495455 | 0.782873  |
| XLOC_006573      | 0.461217   | 0.465507  | 0.0133593    | 0.986828 | 0.99622   |
| Rad51ap2_j1      | 0.100515   | 0.117201  | 0.221578     | 0.841644 | 1         |
| XLOC_006578      | 0.108064   | 0.197698  | 0.87141      | 0.47208  | 0.769302  |
| XLOC_006580      | 0.0355969  | 0.0504418 | 0.502869     | 0.811635 | 1         |
| Nbas             | 1.98952    | 2.75097   | 0            | 1        | 1         |
| Nbas_j2          | 1.39606    | 1.6847    | 0            | 1        | 1         |
| Nbas_j6          | 0.128653   | 0         | 0            | 1        | 1         |
| Ntsr2            | 0.0908009  | 0.134356  | 0.565283     | 0.628577 | 1         |
| Ntsr2_j3         | 0.0433683  | 0.173024  | 1.99626      | 0.155077 | 0.488311  |
| E2f6_j1          | 0.0989335  | 0.4025    | 0            | 1        | 1         |
| Nol10            | 5.19718    | 5.2984    | 0            | 1        | 1         |
| XLOC_006601      | 0.161166   | 0.494157  | 1.61642      | 0.313479 | 0.657803  |
| Cpsf3_j2         | 4.80904    | 6.17568   | 0            | 1        | 1         |
| Iah1_j3          | 2.13937    | 2.2048    | 0.0434631    | 0.781928 | 0.926329  |
| Iah1             | 14.0842    | 14.7982   | 0.0713479    | 0.665891 | 0.873354  |
| Taf1b_j3         | 0          | 0.06964   | 1.79769e+308 | 0.128946 | 1         |

|              |           |             |               |           |           |
|--------------|-----------|-------------|---------------|-----------|-----------|
| Taf1b_j4     | 1.10479   | 1.43493     | 0.377208      | 0.450919  | 0.756347  |
| Mboat2_j1    | 0.11085   | 0.155621    | 0.489425      | 0.359508  | 1         |
| Kidins220_j3 | 17.9821   | 15.7974     | 0             | 1         | 1         |
| Rnaseh1_j1   | 1.76644   | 2.66942     | 0.59568       | 0.0724212 | 0.323852  |
| Tssc1_j1     | 3.38443   | 4.49575     | 0.409651      | 0.0818126 | 0.348483  |
| Myt1l_j3     | 0.548871  | 1.51329     | 0             | 1         | 1         |
| Myt1l_j2     | 1.51309   | 1.13276     | 0             | 1         | 1         |
| Pxdn_j3      | 0.0568835 | 0.642772    | 0             | 1         | 1         |
| Pxdn_j12     | 0.69661   | 1.08273     | 0             | 1         | 1         |
| Fam150b      | 2.14715   | 2.79656     | 0.381228      | 0.0098732 | 0.0849271 |
| Lamb1_j1     | 4.12668   | 5.82981     | 0             | 1         | 1         |
| Cog5_j2      | 3.74829   | 3.22708     | 0             | 1         | 1         |
| Cog5_j4      | 0         | 0.067517    | 0             | 1         | 1         |
| Atxn7l1      | 0.257682  | 0.188161    | -0.453623     | 0.443551  | 0.751387  |
| Snx13_j3     | 0.112388  | 0.0772573   | 0             | 1         | 1         |
| Snx13_j1     | 1.92732   | 1.02858     | 0             | 1         | 1         |
| Etv1_j2      | 0.0613538 | 0.126613    | 1.0452        | 0.680352  | 1         |
| Etv1_j7      | 1.26632   | 0.703646    | -0.847724     | 0.0820422 | 0.349095  |
| Pnpla8       | 11.5818   | 11.1944     | 0             | 1         | 1         |
| Pnpla8_j2    | 10.6061   | 11.111      | 0             | 1         | 1         |
| Nrcam_j2     | 0.410523  | 0.390755    | 0             | 1         | 1         |
| Nrcam_j5     | 4.45376   | 2.39004     | 0             | 1         | 1         |
| XLOC_006658  | 0.0512307 | 0.0564077   | 0.138883      | 0.934336  | 1         |
| Arhgap5_j2   | 4.70723   | 4.3501      | -0.11383      | 0.290248  | 0.637668  |
| Arhgap5_j4   | 0.963346  | 0.701143    | -0.458345     | 0.094296  | 0.378443  |
| Arhgap5_j5   | 0.490572  | 0.422004    | -0.21721      | 0.335457  | 0.6762    |
| Akap6_j6     | 16.2159   | 17.9406     | 0             | 1         | 1         |
| Ctage5_j1    | 0.354684  | 0.0958202   | -1.88813      | 0.0313273 | 0.191094  |
| Ctage5       | 0         | 0.216123    | 1.79769e+308  | 0.0045178 | 0.0470803 |
| Ctage5_j6    | 0         | 0.330871    | 1.79769e+308  | 0.001504  | 0.0197772 |
| Lrfn5_j1     | 6.64263   | 5.52959     | 0             | 1         | 1         |
| Lrfn5_j5     | 0.153469  | 1.13951     | 0             | 1         | 1         |
| Prpf39_j2    | 0.260481  | 0.287545    | 0             | 1         | 1         |
| Klhdc1_j4    | 1.15126   | 1.25933     | 0             | 1         | 1         |
| Arf6         | 1.8437    | 1.35282     | -0.446632     | 0.0157832 | 0.119166  |
| XLOC_006704  | 0.0612273 | 0.0747078   | 0.287083      | 0.853506  | 1         |
| Tmx1_j1      | 0.301004  | 0.214687    | -0.487548     | 0.605061  | 0.844161  |
| XLOC_006707  | 0.0892194 | 0.0793575   | -0.168992     | 0.89189   | 1         |
| Frm6_j4      | 0.238137  | 0.288356    | 0.276059      | 0.704013  | 0.891644  |
| Frm6_j6      | 0.206689  | 0.150223    | -0.460354     | 0.430152  | 0.743027  |
| Ppm1a_j5     | 72.1255   | 73.348      | 0.0242488     | 0.783737  | 0.92714   |
| Slc38a6_j2   | 0.131278  | 0.000146507 | -9.80745      | 0.798513  | 1         |
| Slc38a6_j3   | 0.157897  | 0.0347913   | -2.18218      | 0.0318064 | 0.193109  |
| Slc38a6_j4   | 0.0971431 | 0.121523    | 0.323045      | 0.63939   | 1         |
| Slc38a6_j9   | 0.134798  | 0.186132    | 0.465531      | 0.633104  | 0.857438  |
| Prkch_j3     | 0.463824  | 0           | -1.79769e+308 | 1.26E-07  | 6.58E-06  |
| Hif1a        | 1.10836   | 0           | 0             | 1         | 1         |

|                  |             |           |           |           |           |
|------------------|-------------|-----------|-----------|-----------|-----------|
| Syt16_j1         | 0.59153     | 0.870435  | 0         | 1         | 1         |
| Mthfd1_j4        | 0.0748742   | 1.48775   | 0         | 1         | 1         |
| Zbtb1_j4         | 2.99169     | 2.21383   | -0.43442  | 0.0142989 | 0.111143  |
| Hspa2            | 1.70024     | 2.4849    | 0         | 1         | 1         |
| Gm70_j3          | 5.60E-06    | 0.0658904 | 13.5233   | 0.997424  | 1         |
| Fut8             | 0.762078    | 0.701409  | 0         | 1         | 1         |
| Gphn_j2          | 7.54669     | 6.08317   | 0         | 1         | 1         |
| Plekhh1_j2       | 0.251639    | 0.204909  | 0         | 1         | 1         |
| Slc39a9_j1       | 4.88609     | 5.78036   | 0         | 1         | 1         |
| 3830431G21Rik_j2 | 13.6961     | 12.0091   | 0         | 1         | 1         |
| 3830431G21Rik    | 4.88229     | 3.87645   | 0         | 1         | 1         |
| Srsf5_j4         | 0.929714    | 0.776923  | -0.259016 | 0.468496  | 0.767088  |
| Pcnx_j6          | 0.000280032 | 0.413276  | 0         | 1         | 1         |
| Sipa111_j9       | 1.57726     | 1.99066   | 0.335829  | 0.245842  | 0.593199  |
| Rgs6_j1          | 1.09479     | 0.609912  | -0.843984 | 0.0686126 | 0.313818  |
| Rgs6_j7          | 1.22763     | 0.578272  | -1.08606  | 0.00754   | 0.0696524 |
| Dcaf4_j3         | 0.258708    | 0.546557  | 1.07905   | 0.101808  | 0.395269  |
| Psen1_j2         | 2.71447     | 3.01761   | 0         | 1         | 1         |
| Papln_j3         | 0.698082    | 0.66598   | 0         | 1         | 1         |
| Ptgr2_j1         | 3.77002     | 4.06414   | 0.10838   | 0.736539  | 0.907227  |
| Zfp410_j5        | 2.02748     | 2.29458   | 0.178543  | 0.396791  | 0.721313  |
| Zfp410           | 4.9201      | 5.72185   | 0.217793  | 0.137169  | 0.460677  |
| Isca2_j2         | 6.28309     | 6.92161   | 0.139633  | 0.557055  | 0.819382  |
| Isca2_j3         | 4.99905     | 5.11873   | 0.0341318 | 0.895083  | 0.966913  |
| Jdp2_j2          | 4.49588     | 4.07169   | -0.142976 | 0.445993  | 0.753304  |
| Jdp2_j3          | 1.31421     | 2.71576   | 1.04716   | 0.0209289 | 0.14536   |
| Ttll5_j5         | 2.71593     | 1.97457   | -0.459906 | 0.191973  | 0.534172  |
| 1700019E19Rik_j1 | 0.819277    | 1.11052   | 0.438808  | 0.338648  | 0.678955  |
| Kiaa1737_j2      | 3.19613     | 0.212515  | 0         | 1         | 1         |
| Samd15           | 0.201312    | 0.174566  | 0         | 1         | 1         |
| 1810035L17Rik_j1 | 8.40873     | 10.5006   | 0.320515  | 0.0678517 | 0.311782  |
| Adck1            | 2.06601     | 1.8329    | 0         | 1         | 1         |
| Adck1_j2         | 0.988135    | 0.917987  | 0         | 1         | 1         |
| Nrxn3_j1         | 0.980879    | 0.689902  | -0.507684 | 0.128194  | 0.44626   |
| Nrxn3_j9         | 0.370033    | 0.48536   | 0.391402  | 0.333378  | 0.674409  |
| Nrxn3_j20        | 0.76254     | 0.644136  | 0         | 1         | 1         |
| Zc3h14_j8        | 3.40937     | 3.85959   | 0         | 1         | 1         |
| Zc3h14_j7        | 7.28022     | 6.90829   | 0         | 1         | 1         |
| Zc3h14_j6        | 8.66406     | 7.78234   | 0         | 1         | 1         |
| Kcnk13_j3        | 1.25404     | 0.332708  | 0         | 1         | 1         |
| Psmc1_j4         | 37.1208     | 34.4488   | 0         | 1         | 1         |
| AK039577_j2      | 0.165755    | 0.0538193 | -1.62285  | 0.234454  | 0.581864  |
| AK153660         | 0.370472    | 0.319656  | -0.212844 | 0.630269  | 0.856283  |
| Rin3_j5          | 0.0843408   | 0.069948  | -0.269948 | 0.773925  | 1         |
| Golga5           | 1.47566     | 1.86245   | 0.335845  | 0.167949  | 0.504499  |
| D230037D09Rik    | 1.68253     | 1.84638   | 0         | 1         | 1         |
| Unc79_j11        | 0.253363    | 0.212704  | -0.25236  | 0.549818  | 0.814968  |

|                  |           |             |             |           |           |
|------------------|-----------|-------------|-------------|-----------|-----------|
| Unc79_j16        | 0.048747  | 0.000793753 | -5.94048    | 0.403718  | 1         |
| Unc79_j15        | 1.733     | 1.72793     | -0.00422931 | 0.982508  | 0.994674  |
| Ifi27l1          | 111.433   | 133.589     | 0.261619    | 0.0038449 | 0.0416841 |
| Glrx5_j2         | 54.3306   | 57.7905     | 0.0890671   | 0.428494  | 0.742369  |
| Papola_j3        | 0.316913  | 1.51493     | 0           | 1         | 1         |
| Cyp46a1_j1       | 0.298686  | 0.352373    | 0.238474    | 0.716553  | 0.897676  |
| Eml1_j2          | 8.88002   | 7.34092     | -0.274602   | 0.0600552 | 0.288627  |
| Evl              | 9.70405   | 10.6264     | 0.130993    | 0.35822   | 0.693733  |
| Slc25a47_j4      | 0.102429  | 0.0760475   | -0.429654   | 0.727785  | 1         |
| Slc25a47_j6      | 0.11152   | 0.110313    | -0.0157062  | 0.98581   | 1         |
| Wdr25_j6         | 0         | 0.44588     | 0           | 1         | 1         |
| Dlk1             | 0.0539317 | 0.0977039   | 0.857282    | 0.515367  | 1         |
| Meg3_j4          | 0.348666  | 0.325408    | 0           | 1         | 1         |
| Meg3_j6          | 61.4392   | 73.2561     | 0           | 1         | 1         |
| Meg3_j9          | 86.4645   | 119.581     | 0           | 1         | 1         |
| XLOC_006870      | 0.554052  | 0.645141    | 0           | 1         | 1         |
| Rian_j6          | 7.72526   | 8.5349      | 0           | 1         | 1         |
| Rian_j7          | 12.1216   | 13.1512     | 0           | 1         | 1         |
| Rian_j8          | 2.48858   | 3.25402     | 0           | 1         | 1         |
| Ppp2r5c          | 19.6829   | 20.9308     | 0           | 1         | 1         |
| Dync1h1_j1       | 0.0983772 | 0.075555    | -0.380796   | 0.380908  | 1         |
| Dync1h1_j10      | 14.1078   | 14.9706     | 0.0856466   | 0.477888  | 0.77269   |
| Wdr20a           | 0.522296  | 0.183647    | -1.50794    | 0.0098014 | 0.0844436 |
| Tecpr2_j2        | 0.414609  | 1.42675     | 0           | 1         | 1         |
| Tecpr2_j3        | 7.50214   | 7.7403      | 0           | 1         | 1         |
| Rcor1_j3         | 0.319114  | 0.456985    | 0           | 1         | 1         |
| Rcor1_j1         | 0.39505   | 0.178054    | 0           | 1         | 1         |
| Traf3_j2         | 0.759863  | 0.813454    | 0           | 1         | 1         |
| XLOC_006887      | 0.070669  | 0.0904631   | 0           | 1         | 1         |
| Mark3_j6         | 0.940498  | 0.700424    | 0           | 1         | 1         |
| 2810002N01Rik    | 12.4822   | 12.1257     | -0.041809   | 0.748968  | 0.912754  |
| Klc1             | 78.5919   | 64.3723     | 0           | 1         | 1         |
| Klc1_j1          | 156.504   | 146.832     | 0           | 1         | 1         |
| Zfyve21          | 1.72337   | 2.2454      | 0           | 1         | 1         |
| Zfyve21_j2       | 3.71008   | 3.74817     | 0           | 1         | 1         |
| Siva1_j1         | 6.84E-05  | 0.441131    | 12.6556     | 0.970584  | 0.99168   |
| AW555464_j3      | 2.48826   | 1.0871      | -1.19465    | 2.19E-10  | 2.06E-08  |
| AW555464_j7      | 0.0732107 | 0.0823256   | 0.169287    | 0.865483  | 1         |
| Pld4_j2          | 1.17315   | 2.35442     | 1.00499     | 0.0013237 | 0.0179179 |
| Mta1_j4          | 1.82158   | 1.94744     | 0           | 1         | 1         |
| Mta1_j3          | 0.541779  | 0.246226    | 0           | 1         | 1         |
| Crip2_j5         | 26.1534   | 61.5018     | 0           | 1         | 1         |
| 4930427A07Rik_j5 | 0.205084  | 0.31459     | 0.617262    | 0.231811  | 0.57883   |
| Zfp386_j2        | 0.316933  | 0.342215    | 0.110726    | 0.822937  | 0.942847  |
| Fam62b_j4        | 7.11089   | 6.62315     | 0           | 1         | 1         |
| Ptprn2           | 1.84931   | 1.61858     | 0           | 1         | 1         |
| Ptprn2_j1        | 2.14432   | 1.59514     | 0           | 1         | 1         |

|                  |           |             |              |           |           |
|------------------|-----------|-------------|--------------|-----------|-----------|
| 1110002L01Rik_j3 | 2.34773   | 2.29852     | 0            | 1         | 1         |
| XLOC_006922      | 1.2038    | 1.65905     | 0.462768     | 0.0507847 | 0.260988  |
| Cenpo            | 1.14952   | 1.24357     | 0.113459     | 0.599154  | 0.841178  |
| Ncoa1            | 0.703965  | 1.30641     | 0.892029     | 1.73E-05  | 0.000493  |
| Ncoa1_j7         | 2.53208   | 3.09955     | 0.291736     | 0.0488717 | 0.254675  |
| A830093I24Rik_j1 | 0.0614148 | 0.000103752 | -9.20931     | 0.955133  | 1         |
| Mfsd2b_j2        | 0.107371  | 0.0889537   | 0            | 1         | 1         |
| Klhl29_j4        | 1.70833   | 2.03123     | 0            | 1         | 1         |
| Kcns3_j5         | 0.857146  | 0.618082    | 0            | 1         | 1         |
| Kcns3_j7         | 2.46157   | 0.996506    | 0            | 1         | 1         |
| Trib2_j4         | 2.20837   | 2.34548     | 0            | 1         | 1         |
| Greb1_j12        | 0.824008  | 0.583054    | -0.499029    | 0.0524267 | 0.265923  |
| Greb1            | 0.440729  | 0.40995     | -0.104446    | 0.861848  | 0.956374  |
| Atp6v1c2_j2      | 0.0276154 | 0.11798     | 2.095        | 0.0038603 | 1         |
| Atp6v1c2_j3      | 1.67227   | 1.72047     | 0.0409926    | 0.762575  | 0.918206  |
| Itgb1bp1_j1      | 0.525204  | 0.380178    | -0.466202    | 0.222683  | 0.569646  |
| Adam17           | 2.28371   | 2.30681     | 0.0145215    | 0.901191  | 0.968659  |
| XLOC_006968      | 0         | 0.25664     | 1.79769e+308 | 0.0014419 | 0.0191239 |
| XLOC_006968      | 0.617781  | 0.710343    | 0.201421     | 0.650279  | 0.86573   |
| XLOC_006971      | 1.41784   | 2.33014     | 0.716724     | 0.0364761 | 0.211122  |
| Cys1_j1          | 0.199896  | 0.331362    | 0.729163     | 0.207576  | 0.55198   |
| Rps7_j1          | 1.06901   | 1.14876     | 0.103803     | 0.606545  | 0.845067  |
| Sntg2_j4         | 0.0652656 | 0.0294818   | -1.1465      | 0.505294  | 1         |
| Cbll1_j4         | 1.53629   | 0.784384    | 0            | 1         | 1         |
| Hbp1_j1          | 1.38676   | 1.60294     | 0            | 1         | 1         |
| Prkar2b_j1       | 4.22526   | 3.60745     | 0            | 1         | 1         |
| XLOC_006996      | 0.0939935 | 0.0378845   | -1.31095     | 0.492156  | 1         |
| F730043M19Rik_j4 | 0.0167994 | 0.324193    | 4.27037      | 0.0016199 | 0.0210445 |
| Hdac9_j14        | 0.120881  | 0.444875    | 0            | 1         | 1         |
| Tspan13_j1       | 5.85379   | 5.70619     | 0            | 1         | 1         |
| Stxbp6_j5        | 0.613456  | 0.606611    | 0            | 1         | 1         |
| Nova1_j1         | 0.966276  | 1.08015     | 0.160721     | 0.500775  | 0.785042  |
| Strn3_j1         | 5.74594   | 6.2121      | 0            | 1         | 1         |
| Hectd1_j3        | 7.22552   | 5.74099     | 0            | 1         | 1         |
| Hectd1_j4        | 2.14499   | 1.29361     | 0            | 1         | 1         |
| 6530401N04Rik_j1 | 0.689797  | 0.645117    | -0.09661     | 0.832283  | 0.945814  |
| Eapp_j1          | 4.65919   | 5.97689     | 0.359316     | 0.0668125 | 0.308978  |
| Ppp2r3c_j2       | 0.477006  | 0.607799    | 0            | 1         | 1         |
| Nfkbia_j1        | 1.80122   | 1.56943     | -0.198735    | 0.61372   | 0.847685  |
| Ralgapa1_j2      | 4.08193   | 3.69163     | -0.144994    | 0.198862  | 0.542027  |
| Klhl28_j1        | 4.07081   | 3.4684      | -0.231046    | 0.091348  | 0.371467  |
| Mdga2_j2         | 0.509532  | 0.637077    | 0            | 1         | 1         |
| Mdga2_j3         | 0.335058  | 0.498625    | 0            | 1         | 1         |
| Rps29_j2         | 0.489597  | 0.46526     | -0.0735571   | 0.882982  | 0.962848  |
| Sdccag1_j1       | 0.388329  | 1.55517     | 0            | 1         | 1         |
| Gm71             | 0.0629543 | 0.179952    | 1.51524      | 0.15316   | 0.485324  |
| L2hgdh_j2        | 0.0788473 | 0.123323    | 0.645312     | 0.454452  | 1         |

|                   |            |           |              |           |           |
|-------------------|------------|-----------|--------------|-----------|-----------|
| Cdkl1             | 0.306743   | 0.598089  | 0.963331     | 0.0718567 | 0.322363  |
| Map4k5_j2         | 2.68809    | 2.99986   | 0            | 1         | 1         |
| Map4k5            | 5.06925    | 5.03753   | 0            | 1         | 1         |
| Sav1              | 3.83292    | 3.88609   | 0            | 1         | 1         |
| Nin_j1            | 2.42984    | 2.4321    | 0.00133565   | 0.993957  | 0.99828   |
| mKIAA1565_j10     | 0.0644804  | 0.0476501 | -0.436381    | 0.522361  | 1         |
| mKIAA1565_j12     | 0.536881   | 0.647558  | 0.270406     | 0.426938  | 0.741447  |
| Timm9             | 1.44902    | 2.37897   | 0.715256     | 0.0374313 | 0.214459  |
| Rtn1_j1           | 100.444    | 142.293   | 0            | 1         | 1         |
| Rtn1_j3           | 172.964    | 225.792   | 0            | 1         | 1         |
| Rtn1_j4           | 97.4695    | 106.19    | 0            | 1         | 1         |
| 4930447C04Rik_j4  | 1.01849    | 0.734596  | -0.471405    | 0.157851  | 0.492007  |
| 4930447C04Rik_j15 | 0.909617   | 0.395573  | -1.20132     | 0.0097193 | 0.0838932 |
| 4930447C04Rik_j16 | 0.00625796 | 0.116844  | 4.22275      | 0.219352  | 1         |
| Six1_j1           | 0.285593   | 0.336904  | 0.238374     | 0.59731   | 0.84027   |
| Six1_j2           | 12.85      | 13.1525   | 0.0335673    | 0.75911   | 0.917041  |
| Ppp2r5e_j1        | 0.677887   | 0.683719  | 0.0123589    | 0.963804  | 0.989793  |
| XLOC_007073       | 0.441095   | 0.448898  | 0.0252975    | 0.958632  | 0.988071  |
| Zbtb25_j4         | 0          | 0.0951171 | 1.79769e+308 | 0.0702977 | 1         |
| Zbtb25_j5         | 2.18039    | 1.77121   | -0.299852    | 0.250052  | 0.597613  |
| Zbtb25_j3         | 0.852196   | 0.460364  | -0.88841     | 0.0009207 | 0.0133726 |
| Zbtb25_j6         | 0.487423   | 0.179864  | -1.43827     | 0.0547683 | 0.273004  |
| Zbtb25            | 0.764262   | 0.786988  | 0.0422744    | 0.861049  | 0.956066  |
| Gpx2              | 1.99846    | 1.06767   | -0.904425    | 0.0022207 | 0.0270685 |
| Rab15_j5          | 0.273486   | 0.468504  | 0            | 1         | 1         |
| Max               | 10.9966    | 11.8558   | 0            | 1         | 1         |
| Atp6v1d_j5        | 0.12588    | 0.0751837 | 0            | 1         | 1         |
| Atp6v1d_j3        | 0.607085   | 0.776918  | 0            | 1         | 1         |
| Tmem229b_j2       | 0.124939   | 0.340552  | 0            | 1         | 1         |
| Vti1b_j2          | 0          | 0.0908534 | 0            | 1         | 1         |
| Vti1b             | 35.9507    | 35.2112   | 0            | 1         | 1         |
| Rdh11             | 4.63791    | 5.88125   | 0            | 1         | 1         |
| Zfyve26_j3        | 0.550548   | 0.625124  | 0            | 1         | 1         |
| Dcaf5             | 5.62861    | 5.17408   | 0            | 1         | 1         |
| Dcaf5_j3          | 0.323568   | 0.142631  | 0            | 1         | 1         |
| XLOC_007095       | 0.158355   | 0.0627029 | 0            | 1         | 1         |
| Erh               | 1.13302    | 1.2238    | 0            | 1         | 1         |
| AK145430          | 0.188385   | 0.233072  | 0.307092     | 0.651548  | 0.866264  |
| Synj2bp           | 2.97554    | 1.79317   | -0.730639    | 0.0520848 | 0.264868  |
| Cox16             | 6.40962    | 8.33419   | 0.378802     | 0.232244  | 0.579289  |
| Med6_j5           | 0.424753   | 0.632615  | 0            | 1         | 1         |
| Map3k9_j1         | 2.23558    | 1.55468   | 0            | 1         | 1         |
| XLOC_007106       | 0.0655622  | 0.189694  | 1.53274      | 0.252794  | 0.600851  |
| Dpf3_j4           | 0.77696    | 0.105099  | -2.8861      | 0.0139927 | 0.109464  |
| Zfyve1            | 2.32134    | 2.73931   | 0            | 1         | 1         |
| Zfyve1_j1         | 0.063827   | 0         | 0            | 1         | 1         |
| Numb_j4           | 12.715     | 11.5414   | 0            | 1         | 1         |

|                  |           |                        |           |           |           |
|------------------|-----------|------------------------|-----------|-----------|-----------|
| Entpd5_j5        | 0.174884  | 0.145571               | -0.264676 | 0.644404  | 0.862845  |
| Aldh6a1_j1       | 1.5438    | 3.75418                | 0         | 1         | 1         |
| Abcd4_j2         | 2.06883   | 2.78506                | 0         | 1         | 1         |
| Ltbp2_j1         | 0.439939  | 0.540438               | 0.296826  | 0.484298  | 0.776337  |
| 1110018G07Rik_j1 | 1.355     | 1.33735                | 0         | 1         | 1         |
| Mlh3_j4          | 1.05861   | 2.55451                | 0         | 1         | 1         |
| Tmed10_j1        | 0.325879  | 0.456377               | 0         | 1         | 1         |
| Tmed10_j5        | 4.72753   | 4.26242                | 0         | 1         | 1         |
| O610007P14Rik_j1 | 14.464    | 16.246                 | 0.167613  | 0.266143  | 0.615308  |
| Tgfb3_j1         | 2.69156   | 2.98879                | 0.151116  | 0.587588  | 0.83506   |
| Zdhhc22_j3       | 1.30959   | 1.80102                | 0.459703  | 0.066913  | 0.309185  |
| lsm2_j4          | 0.121491  | 0.167609               | 0.464247  | 0.478032  | 0.77269   |
| XLOC_007151      | 0.0931854 | 0.0807421              | -0.206782 | 0.881037  | 1         |
| XLOC_007151      | 0.0258139 | 0.0663763              | 1.36252   | 0.584838  | 1         |
| 4930534B04Rik_j3 | 0.506958  | 0.368358               | -0.460757 | 0.42286   | 0.738571  |
| Gtf2a1           | 2.96851   | 3.17333                | 0         | 1         | 1         |
| Kcnk10           | 0.609206  | 0.617751               | 0         | 1         | 1         |
| Emi5_j1          | 0.0589462 | 0 -1.79769e+308        |           | 0.083443  | 1         |
| BC002230         | 0.986063  | 0.403733               | -1.28828  | 0.0001925 | 0.0037161 |
| Ttc7b_j7         | 4.9521    | 4.53011                | 0         | 1         | 1         |
| Rps6ka5_j2       | 2.18865   | 2.38816                | 0         | 1         | 1         |
| Ccdc88c          | 0.112241  | 0.0795223              | -0.497167 | 0.626634  | 1         |
| Smek1_j3         | 1.7657    | 2.20358                | 0.319613  | 0.146162  | 0.474441  |
| Smek1            | 1.67735   | 1.7577                 | 0.0675099 | 0.690161  | 0.885208  |
| Lgmn_j2          | 1.9315    | 15.3168                | 0         | 1         | 1         |
| AK010878         | 7.11282   | 8.14338                | 0         | 1         | 1         |
| Prima1           | 2.41691   | 2.4484                 | 0         | 1         | 1         |
| Asb2_j5          | 0.0701738 | 0.227795               | 1.69873   | 0.030221  | 0.186654  |
| Asb2_j3          | 0         | 0.0766341 1.79769e+308 |           | 0.0423967 | 1         |
| Ddx24            | 14.6438   | 19.6465                | 0         | 1         | 1         |
| Serpina3c_j1     | 0.787904  | 0.657032               | 0         | 1         | 1         |
| Snhg10_j1        | 0.114519  | 0.0740406              | -0.629194 | 0.71344   | 1         |
| Setd3_j3         | 13.625    | 15.6838                | 0         | 1         | 1         |
| Begain_j1        | 0.773091  | 0 -1.79769e+308        |           | 3.65E-14  | 6.52E-12  |
| Hsp90aa1_j4      | 47.3866   | 40.6014                | 0         | 1         | 1         |
| Stk30_j5         | 0.701971  | 0.781651               | 0.155114  | 0.781883  | 0.926329  |
| Stk30_j6         | 0.20763   | 0 -1.79769e+308        |           | 0.0048011 | 0.049212  |
| Stk30_j8         | 0.230455  | 0.476747               | 1.04874   | 0.113167  | 0.418717  |
| Stk30_j7         | 0.229501  | 0.0376052              | -2.6095   | 0.163829  | 0.499333  |
| Ankrd9_j4        | 2.16439   | 1.83327                | -0.239542 | 0.409904  | 0.730017  |
| Ankrd9           | 1.41503   | 1.60288                | 0.179833  | 0.497033  | 0.783639  |
| Ankrd9           | 5.14133   | 3.95559                | -0.378251 | 0.052629  | 0.266469  |
| Cdc42bpb         | 10.3585   | 11.2146                | 0         | 1         | 1         |
| AK080484_j2      | 0.0960506 | 0.119522               | 0.315406  | 0.773493  | 1         |
| Ckb_j1           | 6.50791   | 6.41119                | 0         | 1         | 1         |
| Bag5_j1          | 18.3718   | 18.8425                | 0.0364943 | 0.730489  | 0.904795  |
| 5033406O09Rik    | 0         | 0.129392 1.79769e+308  |           | 0.0299538 | 1         |



|                  |           |                 |            |           |           |
|------------------|-----------|-----------------|------------|-----------|-----------|
| 2010107E04Rik_j2 | 101.229   | 97.7417         | -0.0505779 | 0.754846  | 0.91543   |
| Tmem179_j3       | 8.35036   | 8.4188          | 0          | 1         | 1         |
| Jag2             | 2.21723   | 1.12741         | 0          | 1         | 1         |
| Gm16844          | 0.620356  | 0               | 0          | 1         | 1         |
| abParts_j6       | 0.0682653 | 0.0794487       | 0          | 1         | 1         |
| abParts_j7       | 0.548542  | 0.399326        | 0          | 1         | 1         |
| abParts_j10      | 0.810782  | 1.90863         | 0          | 1         | 1         |
| abParts_j17      | 0.281132  | 0.572134        | 0          | 1         | 1         |
| abParts_j18      | 0.051457  | 0.145583        | 0          | 1         | 1         |
| Wdr60_j2         | 0.0382329 | 0.11349         | 0          | 1         | 1         |
| Itgb8_j2         | 4.66245   | 4.7567          | 0          | 1         | 1         |
| XLOC_006541      | 0.0968389 | 0.0355817       | -1.44445   | 0.369473  | 1         |
| Dtnb_j5          | 0.873294  | 1.08287         | 0.310318   | 0.194697  | 0.537102  |
| Dnmt3a           | 0.900939  | 1.19052         | 0          | 1         | 1         |
| Dnmt3a_j5        | 0.133983  | 0               | 0          | 1         | 1         |
| XLOC_006549      | 0.196909  | 0.150822        | -0.384685  | 0.584252  | 0.833357  |
| Its2_j6          | 6.7096    | 6.60941         | -0.0217045 | 0.850717  | 0.9526    |
| Atad2b_j4        | 0.287387  | 0.279735        | 0          | 1         | 1         |
| XLOC_006561      | 0.0834328 | 0.0438144       | 0          | 1         | 1         |
| AK050516_j1      | 0.187012  | 0 -1.79769e+308 | 0.0230719  | 0.155463  |           |
| AK050516         | 0.176102  | 0.115714        | -0.605852  | 0.579239  | 0.830829  |
| Pum2_j6          | 3.62486   | 4.76073         | 0          | 1         | 1         |
| Pum2_j9          | 0.134147  | 0.0415575       | 0          | 1         | 1         |
| Sdc1             | 3.64939   | 5.40634         | 0.566997   | 0.0005794 | 0.0092152 |
| Laptm4a_j2       | 103.026   | 121.425         | 0.237054   | 0.0185021 | 0.133568  |
| Wdr35_j1         | 1.86872   | 2.46763         | 0          | 1         | 1         |
| XLOC_006569      | 0.113882  | 0.142674        | 0.325183   | 0.599926  | 1         |
| Smc6_j1          | 1.42557   | 1.31514         | -0.116325  | 0.657419  | 0.869442  |
| Fam49a_j3        | 0.0911872 | 0               | 0          | 1         | 1         |
| Nbas_j3          | 0.780195  | 0.474537        | 0          | 1         | 1         |
| Nbas_j4          | 4.27537   | 1.89307         | 0          | 1         | 1         |
| XLOC_006585      | 1.08409   | 1.12393         | 0.0520635  | 0.929408  | 0.978343  |
| XLOC_006586      | 0.0704774 | 0.0626509       | -0.169825  | 0.859751  | 1         |
| XLOC_006586      | 0.156166  | 0.119696        | -0.383713  | 0.698389  | 0.888784  |
| Odc1_j4          | 0.143231  | 0.110529        | -0.373921  | 0.73871   | 0.908177  |
| Odc1_j3          | 0.0738947 | 0 -1.79769e+308 | 0.0548447  | 1         |           |
| Odc1_j10         | 0.163223  | 0.318071        | 0.962503   | 0.262156  | 0.611283  |
| AK018309         | 0.609732  | 0.244356        | -1.31919   | 0.144309  | 0.47141   |
| XLOC_006603      | 0.237139  | 0.177536        | -0.417621  | 0.552757  | 0.816696  |
| AK132630_j1      | 0.857323  | 1.00017         | 0.222332   | 0.684917  | 0.882362  |
| XLOC_006612      | 0.0858988 | 0.0834653       | -0.0414623 | 0.96582   | 1         |
| 2410018L13Rik_j1 | 0.370823  | 0.252838        | -0.552521  | 0.379247  | 0.710677  |
| Taf1b_j1         | 4.57415   | 4.06479         | -0.170323  | 0.327629  | 0.670398  |
| Grhl1_j1         | 0.11564   | 0 -1.79769e+308 | 0.025178   | 1         |           |
| Grhl1_j4         | 0.151836  | 0.0498335       | -1.60732   | 0.172457  | 0.509999  |
| Grhl1_j5         | 0.103734  | 0.14585         | 0.491585   | 0.582921  | 1         |
| Grhl1_j6         | 0.110628  | 0.0269711       | -2.03622   | 0.246724  | 1         |

|                  |           |             |               |           |           |
|------------------|-----------|-------------|---------------|-----------|-----------|
| Klf11_j1         | 0.186044  | 0.0899042   | 0             | 1         | 1         |
| Rrm2_j1          | 0.293226  | 0           | -1.79769e+308 | 0.0011455 | 0.0159478 |
| Rrm2             | 0.304187  | 0.520183    | 0.774058      | 0.0581022 | 0.282957  |
| Kidins220_j1     | 2.19632   | 1.90971     | 0             | 1         | 1         |
| Cmpk2_j1         | 4.53126   | 3.72497     | -0.282683     | 0.120201  | 0.431719  |
| XLOC_006625      | 0.518337  | 0.349751    | -0.567565     | 0.531628  | 0.803676  |
| Myt1l_j4         | 0.353746  | 0.338553    | 0             | 1         | 1         |
| Pxdn_j2          | 1.46489   | 1.21404     | 0             | 1         | 1         |
| Pxdn_j1          | 0.974551  | 0.638553    | 0             | 1         | 1         |
| Atxn7l1_j3       | 0.0582996 | 0.130638    | 1.16402       | 0.0851098 | 1         |
| Snx13_j7         | 0.275035  | 0.000135367 | 0             | 1         | 1         |
| Ispd             | 4.54232   | 3.79082     | 0             | 1         | 1         |
| Tmem195_j1       | 2.35624   | 2.48608     | 0.0773857     | 0.775927  | 0.924092  |
| Dgkb_j2          | 0.909567  | 0.794571    | 0             | 1         | 1         |
| Etv1_j5          | 0.193215  | 0           | -1.79769e+308 | 0.0515803 | 0.263342  |
| Dock4_j1         | 0.162585  | 0.111131    | -0.548935     | 0.517931  | 0.79606   |
| XLOC_006658      | 0.0586954 | 0.0508745   | -0.206304     | 0.870377  | 1         |
| XLOC_006658      | 0.137293  | 0.100222    | -0.454055     | 0.489174  | 0.779521  |
| XLOC_006658      | 0.327147  | 0.240548    | -0.443616     | 0.661792  | 0.871768  |
| G2e3             | 0.0556485 | 0           | -1.79769e+308 | 0.0016564 | 1         |
| G2e3_j3          | 0.223341  | 0.165289    | -0.43426      | 0.349578  | 0.687239  |
| Ap4s1_j1         | 7.68913   | 6.3713      | 0             | 1         | 1         |
| Nubpl_j2         | 0.673997  | 0.576439    | -0.225576     | 0.413482  | 0.732276  |
| Arhgap5_j1       | 0.0827903 | 0           | -1.79769e+308 | 2.07E-07  | 1         |
| Akap6_j5         | 0.298761  | 0           | 0             | 1         | 1         |
| XLOC_006669      | 0.133501  | 0.0959388   | -0.476663     | 0.5965    | 1         |
| Prps1l3_j1       | 1.53743   | 2.00229     | 0.381138      | 0.076723  | 0.334845  |
| Ctage5_j3        | 0.449716  | 0.0774645   | -2.53741      | 0.0039785 | 0.0427297 |
| Ctage5_j5        | 4.04197   | 3.27486     | -0.303623     | 0.100809  | 0.393204  |
| Gm527_j3         | 0.109045  | 0.309009    | 1.50272       | 0.0378727 | 0.216037  |
| XLOC_006690      | 0.11028   | 0.0380577   | -1.53491      | 0.317113  | 1         |
| Klhdc1_j2        | 0.161291  | 0           | 0             | 1         | 1         |
| Klhdc2_j1        | 5.12252   | 4.41242     | 0             | 1         | 1         |
| Atl1_j2          | 27.7844   | 26.1233     | 0             | 1         | 1         |
| Atl1_j6          | 31.516    | 30.4434     | 0             | 1         | 1         |
| XLOC_006707      | 0.137145  | 0.0949892   | -0.529865     | 0.604575  | 0.843983  |
| Frmd6_j1         | 0.201197  | 0.110398    | -0.865893     | 0.140501  | 0.46619   |
| XLOC_006710      | 0.161416  | 0.0899131   | -0.844176     | 0.425515  | 0.74056   |
| Psm3_j8          | 14.546    | 13.1991     | -0.140182     | 0.497913  | 0.783786  |
| Psm3_j9          | 0.837343  | 0.706125    | -0.245896     | 0.382882  | 0.712805  |
| 2700049A03Rik    | 0.443014  | 0.471947    | 0             | 1         | 1         |
| 2700049A03Rik_j1 | 0.158838  | 0           | 0             | 1         | 1         |
| Dact1_j2         | 0.216848  | 0           | -1.79769e+308 | 3.43E-06  | 0.0001217 |
| Daam1_j1         | 0.343375  | 0.0692139   | 0             | 1         | 1         |
| Ikamp_j1         | 15.4413   | 9.20795     | 0             | 1         | 1         |
| Lrrc9_j2         | 0.168499  | 0.0707719   | -1.25149      | 0.0791149 | 0.341377  |
| Lrrc9_j3         | 0.0595891 | 0.0189908   | -1.64975      | 0.39827   | 1         |

|                  |             |                 |            |           |           |
|------------------|-------------|-----------------|------------|-----------|-----------|
| XLOC_006718      | 0.244931    | 0.13569         | -0.852067  | 0.165757  | 0.502417  |
| XLOC_006718      | 0.153422    | 0.0808325       | -0.924496  | 0.27787   | 0.626693  |
| XLOC_006720      | 0.38692     | 0.32865         | -0.235486  | 0.58366   | 0.833132  |
| Ppm1a_j3         | 0.648877    | 0 -1.79769e+308 |            | 3.19E-07  | 1.50E-05  |
| Ppm1a_j4         | 0.831229    | 0 -1.79769e+308 |            | 2.69E-06  | 9.86E-05  |
| XLOC_006721      | 0.13589     | 0.0184771       | -2.87862   | 0.11253   | 1         |
| Prkch_j1         | 0.979424    | 1.35537         | 0.468685   | 0.0909602 | 0.370819  |
| Prkch_j2         | 0.330855    | 0.420776        | 0.346852   | 0.520676  | 0.797932  |
| Hif1a_j1         | 9.22804     | 9.56968         | 0          | 1         | 1         |
| Snapc1_j1        | 2.23122     | 1.83882         | 0          | 1         | 1         |
| Snapc1_j3        | 1.26993     | 1.23876         | 0          | 1         | 1         |
| Snapc1_j2        | 0.000212035 | 0.190433        | 0          | 1         | 1         |
| Syne2_j1         | 0.126926    | 0.0493605       | -1.36256   | 0.29902   | 1         |
| Syne2_j12        | 0.582383    | 1.10724         | 0.926928   | 8.02E-05  | 0.0017771 |
| Syne2_j14        | 0.263176    | 0.221139        | -0.251078  | 0.674934  | 0.877505  |
| Mthfd1_j2        | 0.0855561   | 0               | 0          | 1         | 1         |
| Mthfd1_j3        | 3.9039      | 3.08031         | 0          | 1         | 1         |
| Zbtb1_j1         | 1.10026     | 1.01907         | -0.110587  | 0.632005  | 0.8569    |
| Zbtb1_j3         | 2.71888     | 2.5973          | -0.0659983 | 0.738549  | 0.908119  |
| Zbtb1_j1         | 2.49664     | 2.19478         | -0.185913  | 1         | 1         |
| XLOC_006734      | 0.209265    | 0.0731124       | -1.51714   | 0.198943  | 0.542105  |
| Hspa2_j1         | 0.887254    | 0.805335        | 0          | 1         | 1         |
| Churc1_j1        | 2.92331     | 2.75552         | -0.0852803 | 0.755277  | 0.915526  |
| XLOC_006742      | 0.352529    | 0.274393        | 0          | 1         | 1         |
| Rdh12            | 0.0695523   | 0 -1.79769e+308 |            | 0.041616  | 1         |
| Rad51l1_j2       | 0.203935    | 0.089994        | -1.18021   | 0.467487  | 0.766717  |
| Exd2_j1          | 3.01607     | 3.02386         | 0.00371902 | 0.984824  | 0.995509  |
| Galntl1_j1       | 1.24971     | 0.000190621     | 0          | 1         | 1         |
| Galntl1_j2       | 1.25939     | 1.05851         | 0          | 1         | 1         |
| 3830431G21Rik_j1 | 2.06902     | 1.46748         | 0          | 1         | 1         |
| 4933426M11Rik_j2 | 13.4913     | 14.1133         | 0          | 1         | 1         |
| Smoc1_j1         | 0.244658    | 0.126977        | 0          | 1         | 1         |
| Smoc1_j3         | 0.078437    | 0               | 0          | 1         | 1         |
| Ttc9_j1          | 17.5285     | 15.1812         | 0          | 1         | 1         |
| Pcnx_j11         | 3.80972     | 5.7543          | 0          | 1         | 1         |
| Rgs6_j3          | 1.6335      | 0.707295        | -1.20758   | 0.0004427 | 0.0073533 |
| Dcaf4_j4         | 1.1059      | 0.854017        | -0.372887  | 0.368066  | 0.701455  |
| Psen1            | 0.77338     | 1.59658         | 0          | 1         | 1         |
| Papln_j1         | 0.181796    | 0.128184        | 0          | 1         | 1         |
| Lin52_j2         | 3.97567     | 3.45757         | -0.201442  | 0.262768  | 0.611657  |
| Ylpm1_j3         | 0.213946    | 1.20141         | 0          | 1         | 1         |
| Ylpm1_j4         | 1.26473     | 0.537471        | 0          | 1         | 1         |
| Dlst_j2          | 43.349      | 44.2595         | 0          | 1         | 1         |
| Mfsd7c_j3        | 0.134429    | 0.141963        | 0.0786712  | 0.903709  | 1         |
| Ttll5_j2         | 1.42122     | 1.30969         | -0.117903  | 0.600661  | 0.841831  |
| Esrrb_j1         | 0.646031    | 0.395977        | -0.706189  | 0.0240499 | 0.159943  |
| Vash1_j1         | 6.63287     | 7.64565         | 0          | 1         | 1         |

|                  |           |                 |             |           |          |
|------------------|-----------|-----------------|-------------|-----------|----------|
| Gstz1_j2         | 1.17715   | 1.06769         | 0           | 1         | 1        |
| XLOC_006801      | 0.140452  | 0.07132         | 0           | 1         | 1        |
| 1810035L17Rik_j2 | 8.2954    | 7.547           | -0.136408   | 0.309196  | 0.653897 |
| Adck1_j1         | 1.39339   | 0.783153        | 0           | 1         | 1        |
| Nrxn3_j6         | 0.606233  | 0.352478        | -0.782339   | 0.0741363 | 0.328254 |
| Nrxn3_j13        | 0.098655  | 0 -1.79769e+308 | 0.0087037   |           | 1        |
| Nrxn3_j16        | 0.0632708 | 0               | 0           | 1         | 1        |
| Nrxn3_j15        | 2.11261   | 1.60605         | 0           | 1         | 1        |
| Nrxn3_j14        | 2.0109    | 2.19584         | 0           | 1         | 1        |
| Spata7_j1        | 0.3195    | 0.00602484      | -5.72875    | 0.183595  | 0.52417  |
| Spata7_j3        | 0.266812  | 0.0513995       | -2.376      | 0.129555  | 0.448468 |
| Zc3h14           | 2.7002    | 2.67176         | 0           | 1         | 1        |
| AK131831_j1      | 0.0982764 | 0 -1.79769e+308 | 0.0909859   |           | 1        |
| XLOC_006816      | 0.167026  | 0.0688999       | -1.2775     | 0.0784657 | 0.33966  |
| Kcnk13_j2        | 1.72739   | 1.85323         | 0           | 1         | 1        |
| XLOC_006822      | 0.148132  | 0 -1.79769e+308 | 0.0148095   |           | 0.113843 |
| Cpsf2_j1         | 0.381338  | 0.50044         | 0.392127    | 0.291726  | 0.638675 |
| Slc24a4_j1       | 0.0827445 | 0.0765506       | -0.11225    | 0.890702  | 1        |
| Ubr7_j2          | 0.30288   | 0.0663265       | -2.19109    | 0.0166207 | 0.123769 |
| XLOC_006835      | 0.385821  | 0.352619        | -0.129823   | 0.71696   | 0.897819 |
| Unc79_j10        | 0.123641  | 0.0314552       | -1.97479    | 0.0256302 | 1        |
| Otub2_j1         | 1.0934    | 0.377228        | 0           | 1         | 1        |
| Otub2_j2         | 2.5505    | 3.68065         | 0           | 1         | 1        |
| XLOC_006842      | 0.118338  | 0.0261697       | -2.17694    | 0.198406  | 1        |
| XLOC_006842      | 0.0786941 | 0 -1.79769e+308 | 0.0048821   |           | 1        |
| XLOC_006842      | 0.163432  | 0.0806508       | -1.01893    | 0.301789  | 0.648067 |
| XLOC_006843      | 0.157875  | 0.102965        | -0.61663    | 0.348117  | 0.686627 |
| XLOC_006844      | 0.15505   | 0.133138        | -0.219813   | 0.767179  | 0.920598 |
| Papola_j1        | 3.54679   | 3.84694         | 0           | 1         | 1        |
| Vrk1_j1          | 0.732212  | 0.464343        | -0.657071   | 0.155076  | 0.488311 |
| Vrk1_j3          | 0.132295  | 0 -1.79769e+308 | 5.93E-05    |           | 1        |
| XLOC_006852      | 0.118921  | 0.0864346       | -0.460321   | 0.723375  | 1        |
| XLOC_006852      | 0.149962  | 0.0376916       | -1.99228    | 0.175688  | 0.514267 |
| Ccnk_j3          | 5.16483   | 5.26187         | 0.0268544   | 0.856791  | 0.954683 |
| Eml1_j4          | 111.611   | 100.124         | -0.156694   | 0.0680101 | 0.312235 |
| Evl_j3           | 24.3827   | 24.3894         | 0.000393576 | 0.997199  | 0.999188 |
| Yy1_j3           | 0.479547  | 0.324148        | 0           | 1         | 1        |
| Wdr25_j4         | 1.68644   | 0.0856674       | 0           | 1         | 1        |
| Wdr25_j5         | 1.27324   | 0.930335        | 0           | 1         | 1        |
| Wdr25_j7         | 0.958047  | 0.123697        | 0           | 1         | 1        |
| Wdr25_j9         | 0.581493  | 0.180912        | 0           | 1         | 1        |
| Rian_j5          | 2.90499   | 1.65667         | 0           | 1         | 1        |
| Mirg_j1          | 0.456603  | 0.296544        | -0.622695   | 0.0787005 | 0.340223 |
| Mirg_j8          | 0.448106  | 0.375181        | -0.256253   | 0.538374  | 0.807898 |
| Mirg_j13         | 11.8893   | 15.0195         | 0.337174    | 0.0545981 | 0.27251  |
| Dync1h1_j9       | 0.697998  | 0.531254        | -0.39382    | 0.226447  | 0.573564 |
| Rcor1_j4         | 2.57805   | 3.01202         | 0           | 1         | 1        |

|                  |           |                 |            |           |           |
|------------------|-----------|-----------------|------------|-----------|-----------|
| 1200009I06Rik_j2 | 0.0760644 | 0.102435        | 0.429413   | 0.786634  | 1         |
| 1200009I06Rik_j7 | 0.125598  | 0.113468        | -0.146535  | 0.878208  | 1         |
| Tnfaip2_j2       | 0.125104  | 0 -1.79769e+308 | 0.0001052  |           | 1         |
| Tnfaip2_j3       | 0.225535  | 0.0865488       | -1.38177   | 0.145177  | 0.472985  |
| Eif5_j2          | 11.834    | 13.364          | 0          | 1         | 1         |
| Klc1_j9          | 67.955    | 76.0256         | 0          | 1         | 1         |
| Klc1_j7          | 69.176    | 96.7838         | 0          | 1         | 1         |
| Klc1_j8          | 1.18859   | 0.20962         | 0          | 1         | 1         |
| Klc1_j10         | 4.89499   | 0.318159        | 0          | 1         | 1         |
| Zfyve21_j1       | 0.567904  | 0.949813        | 0          | 1         | 1         |
| XLOC_006895      | 0.266274  | 0.152838        | -0.800907  | 0.272297  | 0.621103  |
| Zbtb42_j2        | 0.93167   | 1.66427         | 0.836994   | 0.0001829 | 0.0035629 |
| XLOC_006901      | 0.332211  | 0.442228        | 0.412694   | 0.384521  | 0.713264  |
| Btbd6            | 0.320232  | 0.461676        | 0.527764   | 0.126969  | 0.443867  |
| Mta1_j2          | 5.50493   | 6.49483         | 0          | 1         | 1         |
| Crip2_j1         | 50.3968   | 33.8228         | 0          | 1         | 1         |
| Crip2_j4         | 16.938    | 13.424          | 0          | 1         | 1         |
| Crip2_j7         | 50.3968   | 33.8228         | 0          | 1         | 1         |
| 4930427A07Rik_j4 | 0.416541  | 0.475262        | 0.190266   | 0.603971  | 0.843588  |
| Fam62b_j1        | 1.2434    | 1.2129          | 0          | 1         | 1         |
| Ptprn2_j2        | 0.486203  | 0.000184378     | 0          | 1         | 1         |
| Tmem196_j1       | 0.805503  | 0.304207        | -1.40484   | 0.0099395 | 0.0853084 |
| Efr3b_j1         | 0.557794  | 0.639716        | 0          | 1         | 1         |
| Efr3b_j2         | 0.952707  | 0.706768        | 0          | 1         | 1         |
| Ncoa1_j5         | 8.95231   | 9.91312         | 0.14708    | 0.264489  | 0.613354  |
| Ncoa1_j6         | 0.430728  | 0.407365        | -0.0804569 | 0.799602  | 0.933125  |
| XLOC_006928      | 0.257157  | 0.103743        | -1.30964   | 0.0899723 | 0.368147  |
| Mfsd2b_j3        | 0.142117  | 0.163178        | 0          | 1         | 1         |
| Mfsd2b_j4        | 0.0646731 | 0               | 0          | 1         | 1         |
| Ubxn2a_j2        | 2.47532   | 0.721951        | 0          | 1         | 1         |
| Ubxn2a_j1        | 5.7595    | 5.10391         | 0          | 1         | 1         |
| Klhl29_j2        | 1.05998   | 0.814536        | 0          | 1         | 1         |
| Slc7a15_j1       | 0.0715815 | 0.0182334       | -1.973     | 0.273584  | 1         |
| XLOC_006940      | 0.0887146 | 0 -1.79769e+308 | 0.0043013  |           | 1         |
| Kcns3_j8         | 1.91019   | 1.81404         | 0          | 1         | 1         |
| Gen1_j2          | 0.15982   | 0.0915629       | -0.803611  | 0.239791  | 0.587144  |
| Ddx1_j1          | 26.3114   | 23.5447         | 0          | 1         | 1         |
| XLOC_006948      | 0.126457  | 0.0675691       | -0.904209  | 0.168355  | 1         |
| XLOC_006951      | 0.147937  | 0.0862797       | -0.777889  | 0.286779  | 0.635459  |
| Lpin1_j4         | 0.249281  | 0               | 0          | 1         | 1         |
| Lpin1_j1         | 3.38801   | 3.60365         | 0          | 1         | 1         |
| Greb1_j3         | 0.153665  | 0 -1.79769e+308 | 3.58E-09   | 2.71E-07  |           |
| AK148766_j4      | 0.139575  | 0.024572        | -2.50595   | 0.394554  | 0.719811  |
| Ywhaq_j2         | 0.218271  | 0.260573        | 0.255569   | 0.567121  | 0.82484   |
| Rnf144a          | 1.79129   | 1.36608         | 0          | 1         | 1         |
| Rnf144a_j2       | 0.0958244 | 0.057779        | 0          | 1         | 1         |
| AK163447_j6      | 1.60764   | 2.8815          | 0.841872   | 3.16E-05  | 0.0008086 |

|                  |           |                 |           |           |           |
|------------------|-----------|-----------------|-----------|-----------|-----------|
| Rps7_j4          | 1.40392   | 0.841208        | -0.738923 | 0.28876   | 0.636409  |
| Sntg2_j2         | 0.100097  | 0.0347116       | -1.52791  | 0.302148  | 1         |
| Cbll1            | 0.402024  | 0.371352        | 0         | 1         | 1         |
| Prkar2b_j2       | 48.1629   | 32.4254         | 0         | 1         | 1         |
| AK016682_j2      | 0.143833  | 0.133433        | -0.108276 | 0.884889  | 0.963475  |
| AK016682_j3      | 0.145552  | 0.0413233       | -1.8165   | 0.467778  | 0.766747  |
| AK016682_j4      | 0.181986  | 0.0601527       | -1.59713  | 0.311337  | 0.656077  |
| F730043M19Rik_j1 | 0.46137   | 0.125491        | -1.87834  | 0.0014771 | 0.0194908 |
| F730043M19Rik_j3 | 0.782486  | 0.393231        | -0.992688 | 0.0198177 | 0.139936  |
| Hdac9_j7         | 0.503216  | 0               | 0         | 1         | 1         |
| Hdac9_j8         | 0.292281  | 0.238278        | 0         | 1         | 1         |
| Ifrd1_j2         | 1.59015   | 2.46504         | 0.632451  | 0.0039178 | 0.0422647 |
| Hectd1_j8        | 4.029     | 4.78429         | 0         | 1         | 1         |
| Hectd1_j9        | 3.36275   | 3.75551         | 0         | 1         | 1         |
| Heatr5a_j4       | 0.234896  | 0.536039        | 1.19032   | 0.0046857 | 0.0483138 |
| Egln3_j1         | 0.334844  | 0.233771        | -0.51839  | 0.416087  | 0.733677  |
| Baz1a_j11        | 0.063794  | 0.0562814       | -0.180762 | 0.900788  | 1         |
| Ppp2r3c_j3       | 1.20318   | 1.29096         | 0         | 1         | 1         |
| Ralgapa1_j10     | 0.861824  | 0.659786        | -0.385395 | 0.127552  | 0.445107  |
| Ralgapa1_j11     | 0.0799757 | 0.177708        | 1.15187   | 0.0225407 | 0.15317   |
| Ralgapa1         | 5.24852   | 4.27321         | -0.296589 | 0.0135489 | 0.107058  |
| Mbip_j2          | 2.62788   | 1.76184         | -0.576815 | 0.101318  | 0.394191  |
| Fkbp3_j1         | 36.9309   | 36.9346         | 0         | 1         | 1         |
| C79407_j2        | 0.0569907 | 0 -1.79769e+308 | 0.0164851 | 1         | 1         |
| Mdga2_j1         | 0.594764  | 0.240931        | 0         | 1         | 1         |
| 1110034A24Rik_j3 | 38.4095   | 39.0281         | 0         | 1         | 1         |
| Pole2_j3         | 0.0876659 | 0.0780225       | 0         | 1         | 1         |
| Sdccag1_j5       | 0.363262  | 0.0929898       | 0         | 1         | 1         |
| L2hgdh_j5        | 0.160197  | 0.000151444     | -10.0468  | 0.981203  | 0.994152  |
| Cdkl1_j3         | 0.151802  | 0.0281754       | -2.42968  | 0.127859  | 0.445556  |
| Trim9_j4         | 0.12926   | 0.0638189       | 0         | 1         | 1         |
| Trim9            | 1.35612   | 1.01549         | 0         | 1         | 1         |
| Trim9            | 1.89448   | 0.724711        | 0         | 1         | 1         |
| Timm9_j4         | 1.16681   | 0.601091        | -0.956921 | 0.215314  | 0.561132  |
| Timm9_j3         | 0.0938208 | 0.186713        | 0.992842  | 0.512964  | 0.792348  |
| Rtn1_j5          | 0.097831  | 0.0205112       | 0         | 1         | 1         |
| 4930447C04Rik_j1 | 0.0627472 | 0 -1.79769e+308 | 0.0122902 | 1         | 1         |
| 4930447C04Rik_j3 | 0.152684  | 0.087696        | -0.799969 | 0.285062  | 0.633819  |
| Trmt5_j2         | 0.396952  | 0.547795        | 0.464671  | 0.213539  | 0.558716  |
| Gpx2_j1          | 1.81331   | 1.05248         | -0.784829 | 0.0680816 | 0.312432  |
| Max_j1           | 1.61025   | 1.52455         | 0         | 1         | 1         |
| Tmem229b         | 0.75701   | 0.370812        | 0         | 1         | 1         |
| Vti1b_j1         | 22.7269   | 25.6318         | 0         | 1         | 1         |
| Zfyve26_j4       | 0.906865  | 1.3599          | 0         | 1         | 1         |
| Zfyve26_j1       | 0.514897  | 0.235312        | 0         | 1         | 1         |
| Actn1_j6         | 0.568967  | 0.361949        | 0         | 1         | 1         |
| Actn1            | 8.32431   | 8.01691         | 0         | 1         | 1         |

|                  |             |                 |             |           |           |
|------------------|-------------|-----------------|-------------|-----------|-----------|
| Dcaf5_j1         | 4.38847     | 5.78196         | 0           | 1         | 1         |
| XLOC_007095      | 0.219779    | 0.0904224       | 0           | 1         | 1         |
| XLOC_007095      | 0.0960987   | 0.00767525      | 0           | 1         | 1         |
| Slc8a3_j1        | 0.450462    | 0.163799        | 0           | 1         | 1         |
| Synj2bp_j1       | 0.490622    | 0.380396        | -0.367108   | 0.593864  | 0.838285  |
| Med6_j3          | 3.74487     | 1.78102         | 0           | 1         | 1         |
| Med6_j4          | 0.200823    | 0.214791        | 0           | 1         | 1         |
| XLOC_007106      | 0.0678707   | 0.0269856       | -1.3306     | 0.53461   | 1         |
| Dpf3_j5          | 0.241684    | 0.000594361     | -8.66756    | 0.73044   | 0.904795  |
| Zfyve1_j2        | 0.0707572   | 0               | 0           | 1         | 1         |
| C130039O16Rik_j2 | 0.117814    | 0               | 0           | 1         | 1         |
| Fam161b          | 0.000132504 | 0.150213        | 10.1468     | 0.383039  | 1         |
| Entpd5_j2        | 1.26163     | 0.452393        | -1.47965    | 2.57E-06  | 9.47E-05  |
| Entpd5_j3        | 0.121217    | 0 -1.79769e+308 |             | 8.61E-05  | 1         |
| Entpd5_j4        | 0.108053    | 0.072554        | -0.574608   | 0.457513  | 1         |
| Entpd5           | 4.95616     | 4.26547         | -0.216519   | 0.105695  | 0.403795  |
| Ltbp2_j4         | 0.205453    | 0.120294        | -0.772242   | 0.0858216 | 0.357676  |
| 1110018G07Rik_j5 | 13.2092     | 11.3093         | 0           | 1         | 1         |
| Mlh3_j3          | 0.374229    | 0.41411         | 0           | 1         | 1         |
| Acyp1_j2         | 12.8469     | 11.2495         | -0.191557   | 0.484599  | 0.77644   |
| Acyp1            | 6.69547     | 7.66202         | 0.194539    | 0.607595  | 0.845335  |
| Nek9_j4          | 5.82059     | 6.31507         | 0           | 1         | 1         |
| Tgfb3_j3         | 1.00653     | 1.21962         | 0.277042    | 0.450302  | 0.756063  |
| 4930534B04Rik_j2 | 0.128915    | 0.0410664       | -1.65039    | 0.0687329 | 1         |
| Gtf2a1_j3        | 0.0658952   | 0.0255711       | 0           | 1         | 1         |
| Sel1l_j2         | 9.1675      | 10.49           | 0           | 1         | 1         |
| Galc_j2          | 1.45676     | 1.28896         | 0           | 1         | 1         |
| Galc_j3          | 3.37418     | 3.18487         | 0           | 1         | 1         |
| Ptpn21_j1        | 0.102177    | 0               | 0           | 1         | 1         |
| Foxn3_j1         | 4.09723     | 4.57786         | 0           | 1         | 1         |
| 2610021K21Rik_j1 | 0.158164    | 0.0541341       | -1.54681    | 0.22696   | 0.574135  |
| XLOC_007168      | 0.121894    | 0.106363        | -0.196634   | 0.767036  | 1         |
| Ttc7b_j3         | 8.31744     | 7.85558         | 0           | 1         | 1         |
| Ttc7b_j4         | 1.71884     | 2.76451         | 0           | 1         | 1         |
| Ttc7b_j5         | 1.56361     | 0.742713        | 0           | 1         | 1         |
| Ttc7b_j1         | 6.18499     | 2.74216         | 0           | 1         | 1         |
| Gpr68_j1         | 0.103738    | 0.103408        | -0.00460722 | 0.994919  | 1         |
| Fbln5_j3         | 14.3108     | 13.7578         | 0           | 1         | 1         |
| Trip11_j2        | 4.56134     | 4.53579         | -0.00810523 | 0.949489  | 0.985359  |
| Trip11_j3        | 1.6956      | 1.78915         | 0.0774737   | 0.609555  | 0.846264  |
| Atxn3_j3         | 0.137178    | 0               | 0           | 1         | 1         |
| Lgmn_j3          | 0.2326      | 0               | 0           | 1         | 1         |
| Itpk1_j1         | 3.83552     | 5.22704         | 0           | 1         | 1         |
| Ifi27l2a_j2      | 0.388732    | 0 -1.79769e+308 |             | 0.0330034 | 0.197926  |
| Ifi27l2a_j3      | 5.39335     | 8.93003         | 0.727484    | 0.0011482 | 0.0159722 |
| Serpina11_j1     | 0.951394    | 0.522245        | -0.865317   | 0.0029753 | 0.034249  |
| Clmn             | 0.449074    | 0.603352        | 0           | 1         | 1         |

|                  |             |                        |            |           |           |
|------------------|-------------|------------------------|------------|-----------|-----------|
| 4831426119Rik_j4 | 0.0539446   | 0                      | 0          | 1         | 1         |
| Atg2b_j1         | 3.14132     | 2.9068                 | -0.111938  | 0.42672   | 0.741332  |
| XLOC_007199      | 0.140525    | 0.0396623              | -1.82499   | 0.105744  | 0.403811  |
| XLOC_007201      | 0.0647407   | 0 -1.79769e+308        |            | 0.022694  | 1         |
| XLOC_007201      | 0.135175    | 0.0607271              | -1.15442   | 0.290843  | 1         |
| Bcl11b_j1        | 0.294932    | 0.205509               | 0          | 1         | 1         |
| Setd3_j1         | 0.48942     | 0.521439               | 0          | 1         | 1         |
| Setd3_j2         | 0.176188    | 0.133923               | 0          | 1         | 1         |
| Ccdc85c_j2       | 0.765539    | 0 -1.79769e+308        |            | 3.99E-15  | 7.96E-13  |
| Slc25a29_j1      | 4.31919     | 3.64832                | -0.243526  | 0.153531  | 0.486123  |
| Hsp90aa1_j1      | 2.12377     | 3.68454                | 0          | 1         | 1         |
| Hsp90aa1_j2      | 6.35249     | 4.47284                | 0          | 1         | 1         |
| Hsp90aa1_j3      | 8.69877     | 10.2734                | 0          | 1         | 1         |
| Stk30_j17        | 0           | 0.0515336 1.79769e+308 |            | 0.181475  | 1         |
| Stk30_j18        | 0.156447    | 0.231414               | 0.564803   | 0.540524  | 0.808873  |
| Ankrd9_j3        | 0.30246     | 0.299782               | -0.0128337 | 0.986761  | 0.99622   |
| mKIAA1124        | 7.46938     | 8.30295                | 0          | 1         | 1         |
| AK012841_j1      | 0.477375    | 0.504954               | 0          | 1         | 1         |
| Ckb_j3           | 4.08354     | 8.21354                | 0          | 1         | 1         |
| Ppp1r13b_j2      | 0.368503    | 0.303329               | 0          | 1         | 1         |
| 5033406O09Rik_j5 | 0.173335    | 0.112503               | -0.623608  | 0.572472  | 0.827134  |
| Tmem179_j2       | 21.064      | 30.0862                | 0          | 1         | 1         |
| abParts_j3       | 0.141298    | 0                      | 0          | 1         | 1         |
| abParts_j14      | 1.65158     | 0.0373297              | 0          | 1         | 1         |
| D430020J02Rik    | 0.105528    | 0.0429523              | -1.29681   | 0.296032  | 1         |
| Sp4              | 0.378368    | 0.259705               | 0          | 1         | 1         |
| XLOC_006541      | 0.246099    | 0.23092                | -0.0918474 | 0.863591  | 0.956634  |
| Dtnb_j8          | 1.15248     | 0.552792               | -1.05993   | 0.0001231 | 0.0025537 |
| Dnmt3a           | 0.0995517   | 0.161063               | 0          | 1         | 1         |
| Dnmt3a_j8        | 0.282436    | 0.342655               | 0          | 1         | 1         |
| Dnajc27_j4       | 0.110665    | 0.208443               | 0          | 1         | 1         |
| Dnajc27_j2       | 0.0744879   | 0.0617593              | 0          | 1         | 1         |
| Dnajc27_j3       | 2.40622     | 1.81524                | 0          | 1         | 1         |
| Adcy3_j1         | 0.224126    | 0.340492               | 0          | 1         | 1         |
| BC067010_j2      | 4.83738     | 4.91024                | 0.0215653  | 0.877631  | 0.96086   |
| Atad2b_j1        | 0.0513808   | 0.0982484              | 0          | 1         | 1         |
| XLOC_006559      | 0           | 0.0877475 1.79769e+308 |            | 0.0340267 | 1         |
| XLOC_006561      | 0.0158268   | 0.101828               | 0          | 1         | 1         |
| Hs1bp3_j1        | 0.000147528 | 0.593721               | 0          | 1         | 1         |
| Pum2_j2          | 0.521173    | 0.360188               | 0          | 1         | 1         |
| XLOC_006574      | 0.0827232   | 0.087905               | 0.0876524  | 0.920897  | 1         |
| XLOC_006581      | 0.0887659   | 0.155774               | 0.811377   | 0.360231  | 1         |
| Nbas_j9          | 4.47085     | 4.94858                | 0          | 1         | 1         |
| XLOC_006586      | 0.21102     | 0.176955               | -0.254002  | 0.813889  | 0.939298  |
| Nol10_j5         | 0           | 0.422511               | 0          | 1         | 1         |
| Odc1_j2          | 0.549212    | 0.785586               | 0.516405   | 0.141558  | 0.468103  |
| Odc1_j15         | 1.2117      | 3.97647                | 1.71446    | 8.53E-08  | 4.67E-06  |



|                  |            |                        |           |           |           |
|------------------|------------|------------------------|-----------|-----------|-----------|
| BC031503_j1      | 14.6824    | 16.3158                | 0.152182  | 0.326604  | 0.669796  |
| BC031503_j2      | 0          | 0.12991 1.79769e+308   |           | 0.123635  | 1         |
| AK149188_j1      | 1.02754    | 0.938123               | -0.13134  | 0.806373  | 0.935967  |
| Gm4983_j1        | 7.24E-05   | 0.179513               | 11.2764   | 0.965825  | 0.9902    |
| XLOC_006609      | 2.70191    | 1.78151                | -0.600878 | 0.134897  | 0.457099  |
| XLOC_006614      | 0.519503   | 0.924508               | 0.831554  | 0.0083213 | 0.0747414 |
| Taf1b_j2         | 1.88559    | 1.45659                | -0.372424 | 0.255962  | 0.604701  |
| Myt1l_j5         | 0.317346   | 0.962165               | 0         | 1         | 1         |
| Lamb1_j3         | 2.48615    | 0.726192               | 0         | 1         | 1         |
| Lamb1_j4         | 5.60311    | 5.95299                | 0         | 1         | 1         |
| Atxn7l1_j1       | 0.656506   | 0.437912               | -0.584167 | 0.0344676 | 0.203708  |
| Ispd_j2          | 0.761126   | 1.05629                | 0         | 1         | 1         |
| Dgkb_j1          | 0.310365   | 0.161711               | 0         | 1         | 1         |
| Etv1_j4          | 3.32895    | 1.55957                | -1.09391  | 0.0001152 | 0.0024236 |
| Nrcam_j7         | 0.878148   | 0.875389               | 0         | 1         | 1         |
| Nubpl_j4         | 0          | 0.0617662 1.79769e+308 |           | 0.0454963 | 1         |
| Arhgap5_j6       | 0.0505162  | 0 -1.79769e+308        |           | 0.0004824 | 1         |
| Akap6_j1         | 13.8976    | 15.4351                | 0         | 1         | 1         |
| Npas3_j1         | 0.0616961  | 0.0453515              | -0.444029 | 0.741423  | 1         |
| XLOC_006669      | 1.72E-05   | 0.0890124              | 12.3365   | 0.995197  | 1         |
| Srp54c           | 3.53363    | 2.6281                 | 0         | 1         | 1         |
| Ctage5_j2        | 2.47317    | 2.55693                | 0.0480535 | 0.822744  | 0.942844  |
| Fancm_j2         | 0.0474209  | 0.0655467              | 0.467001  | 0.464387  | 1         |
| Klhdc2_j2        | 46.6849    | 46.1316                | 0         | 1         | 1         |
| XLOC_006699      | 0.00210768 | 0.0970385              | 5.52483   | 0.520213  | 1         |
| XLOC_006704      | 0.170921   | 0.247535               | 0.5343    | 0.341677  | 0.681558  |
| Frmf6_j3         | 0          | 0.0744391 1.79769e+308 |           | 0.0229334 | 1         |
| Psm3_j2          | 0.20861    | 0.419242               | 1.00698   | 0.226476  | 0.573564  |
| Dact1_j3         | 0.975093   | 1.16821                | 0.260687  | 0.285149  | 0.633925  |
| Daam1_j3         | 4.08988    | 5.20521                | 0         | 1         | 1         |
| Ppm1a_j1         | 0.493425   | 1.67863                | 1.76638   | 0.0002493 | 0.0046144 |
| Ppm1a            | 9.87049    | 7.64727                | -0.368176 | 0.040483  | 0.225632  |
| Slc38a6_j11      | 0.100904   | 0.327332               | 1.69776   | 0.109299  | 0.411339  |
| Syt16_j2         | 0.707069   | 0.411274               | 0         | 1         | 1         |
| Syne2_j2         | 0.102711   | 0.129843               | 0.338183  | 0.694005  | 1         |
| Syne2_j3         | 0.100469   | 0.153171               | 0.608392  | 0.407606  | 1         |
| Syne2_j5         | 0.199271   | 0.235724               | 0.242372  | 0.349801  | 0.687467  |
| Syne2_j4         | 0.0312911  | 0.0667304              | 1.09259   | 0.0427106 | 1         |
| Syne2_j15        | 2.53266    | 2.84571                | 0.168135  | 0.333792  | 0.674658  |
| Gm70_j1          | 0.0568611  | 0.231183               | 2.02352   | 0.0848342 | 0.355514  |
| Plekhg3_j1       | 0.357198   | 0.344462               | 0         | 1         | 1         |
| Arg2             | 0.628912   | 0.928816               | 0         | 1         | 1         |
| Rdh12_j2         | 0          | 0.109316 1.79769e+308  |           | 0.0435008 | 1         |
| Rdh12_j1         | 0          | 0.0920051 1.79769e+308 |           | 0.063857  | 1         |
| Rad51l1_j3       | 0.112915   | 0.16544                | 0.551068  | 0.633252  | 0.857512  |
| 4933426M11Rik_j1 | 0          | 0.157297               | 0         | 1         | 1         |
| Srsf5_j7         | 13.418     | 15.1089                | 0.171225  | 0.171157  | 0.507955  |

|               |           |           |              |           |           |
|---------------|-----------|-----------|--------------|-----------|-----------|
| Pcnx_j8       | 0.510093  | 0.513349  | 0            | 1         | 1         |
| Sipa1l1_j3    | 0.0528665 | 0.079627  | 0.590904     | 0.411807  | 1         |
| Sipa1l1_j8    | 0.788858  | 0.746931  | -0.0787901   | 0.79097   | 0.930334  |
| Rgs6_j5       | 0.816934  | 0.520585  | -0.650086    | 0.0160758 | 0.120776  |
| Dnalc1_j1     | 0.525763  | 0.737971  | 0            | 1         | 1         |
| Coq6_j1       | 4.98772   | 5.04348   | 0.0160405    | 0.927547  | 0.977629  |
| Fcf1_j6       | 0.362298  | 0.267203  | -0.439243    | 1         | 1         |
| Ylpm1_j1      | 1.64002   | 1.14482   | 0            | 1         | 1         |
| XLOC_006783   | 0.143977  | 0.0883244 | -0.704957    | 0.511316  | 0.791501  |
| Jdp2_j1       | 0.157114  | 0.357338  | 1.18547      | 0.0318025 | 0.193109  |
| Batf          | 0.0977988 | 0.299973  | 1.61695      | 0.0326739 | 0.196609  |
| Mfsd7c_j1     | 0.444312  | 0.617115  | 0.473967     | 0.0971135 | 0.385205  |
| Ttll5_j4      | 2.60867   | 3.33541   | 0.354553     | 0.0431295 | 0.235574  |
| Ttll5_j6      | 9.97405   | 10.2293   | 0.0364597    | 0.80223   | 0.934265  |
| 2310044G17Rik | 9.48449   | 4.69793   | 0            | 1         | 1         |
| Gstz1         | 5.74054   | 4.87734   | 0            | 1         | 1         |
| Ttc8_j1       | 0.976864  | 0.859738  | -0.18426     | 0.526216  | 0.800979  |
| XLOC_006818   | 0.0686528 | 0.15358   | 0            | 1         | 1         |
| Psmc1_j1      | 2.93584   | 5.11523   | 0            | 1         | 1         |
| Rin3_j2       | 0         | 0.250961  | 1.79769e+308 | 0.0001438 | 0.0029061 |
| Rin3_j4       | 9.08E-05  | 0.107332  | 10.2071      | 0.867507  | 1         |
| Unc79_j8      | 0.499598  | 0.166385  | -1.58624     | 1.10E-05  | 0.0003356 |
| Unc79_j7      | 0.0447639 | 0.0874387 | 0.965936     | 0.130556  | 1         |
| Ifi27l1_j1    | 0.332877  | 0.38849   | 0.222888     | 0.768132  | 0.921044  |
| Ifi27l1       | 19.372    | 19.1494   | -0.0166742   | 0.922082  | 0.975613  |
| Ppp4r4_j2     | 3.77945   | 4.30015   | 0            | 1         | 1         |
| Serpina3g_j1  | 25.6932   | 20.9109   | 0            | 1         | 1         |
| Serpina3n_j1  | 17.3826   | 33.3168   | 0            | 1         | 1         |
| Serpina3n_j2  | 37.3026   | 38.1227   | 0            | 1         | 1         |
| Glrx5_j1      | 0         | 0.398096  | 1.79769e+308 | 0.0347816 | 0.204868  |
| XLOC_006852   | 0.0756994 | 0.121317  | 0.680431     | 0.448136  | 1         |
| XLOC_006853   | 0.556712  | 0.745066  | 0.420437     | 0.221406  | 0.568585  |
| Ccnk_j1       | 1.58637   | 1.24391   | -0.350851    | 0.109673  | 0.412055  |
| Hhip1_j1      | 0         | 0.114886  | 0            | 1         | 1         |
| Eml1_j5       | 0.0578761 | 0.0236699 | -1.28991     | 0.419864  | 1         |
| Evl_j5        | 36.9271   | 48.0596   | 0.380144     | 0.0016755 | 0.0216618 |
| Yy1_j1        | 4.40246   | 5.88532   | 0            | 1         | 1         |
| Wdr25_j2      | 0.114428  | 0.216284  | 0            | 1         | 1         |
| Wdr25_j1      | 0.182494  | 1.72568   | 0            | 1         | 1         |
| Meg3_j3       | 74.7622   | 69.5881   | 0            | 1         | 1         |
| XLOC_006868   | 0.204358  | 0.155489  | -0.394281    | 0.558523  | 0.820112  |
| XLOC_006871   | 0.0915302 | 0.293196  | 1.67955      | 0.0401522 | 0.224352  |
| Mirg_j6       | 0.0228462 | 0.174257  | 2.93119      | 0.0738063 | 0.327402  |
| Mirg_j9       | 0.235138  | 0.603482  | 1.3598       | 0.0478664 | 0.251548  |
| Mirg_j11      | 0.215448  | 0.206474  | -0.0613822   | 0.927795  | 0.977629  |
| Mirg_j12      | 0.838168  | 0.791153  | -0.0832818   | 0.848028  | 0.951888  |
| Ppp2r5c_j1    | 12.8997   | 13.8751   | 0            | 1         | 1         |

|                  |             |           |              |           |           |
|------------------|-------------|-----------|--------------|-----------|-----------|
| Ppp2r5c          | 4.85008     | 4.69132   | 0            | 1         | 1         |
| Dync1h1_j6       | 7.20276     | 6.96784   | -0.0478373   | 0.630757  | 0.856399  |
| Rcor1_j5         | 2.17146     | 2.03266   | 0            | 1         | 1         |
| Traf3_j1         | 0           | 0.165556  | 0            | 1         | 1         |
| 1200009I06Rik_j4 | 0.0933945   | 0.139008  | 0.573758     | 0.60551   | 1         |
| Mark3_j2         | 0.133341    | 0.146829  | 0            | 1         | 1         |
| Klc1_j13         | 0.204216    | 0.148987  | 0            | 1         | 1         |
| Klc1_j12         | 129.835     | 124.57    | 0            | 1         | 1         |
| Kif26a           | 0.36122     | 0.376485  | 0.0597123    | 0.829821  | 0.944995  |
| Inf2_j1          | 0.293314    | 1.84462   | 2.65281      | 2.80E-07  | 1.34E-05  |
| AW555464_j2      | 0.869597    | 2.43483   | 1.4854       | 2.22E-16  | 5.36E-14  |
| Pld4_j1          | 0           | 0.085755  | 1.79769e+308 | 0.0711634 | 1         |
| Pacs2            | 3.66902     | 6.6422    | 0            | 1         | 1         |
| Mta1             | 3.70033     | 3.36293   | 0            | 1         | 1         |
| Crip2_j6         | 0.0984377   | 0.185051  | 0            | 1         | 1         |
| 4930427A07Rik_j3 | 0.331896    | 0.172098  | -0.947501    | 0.0972162 | 0.385461  |
| Zfp386_j3        | 0           | 0.148499  | 1.79769e+308 | 0.0186789 | 1         |
| Fam62b_j2        | 2.8924      | 4.619     | 0            | 1         | 1         |
| Ncapg2_j3        | 0.044957    | 0.0618664 | 0.460608     | 0.770436  | 1         |
| Ncapg2_j6        | 0.805229    | 0.85308   | 0.0832823    | 0.750205  | 0.913279  |
| 1110002L01Rik_j1 | 0.196427    | 0.225722  | 0            | 1         | 1         |
| XLOC_006928      | 0           | 0.141871  | 1.79769e+308 | 0.014927  | 1         |
| Fkbp1b_j3        | 84.4642     | 87.0744   | 0            | 1         | 1         |
| Slc7a15_j5       | 0.0958761   | 0.161262  | 0.75016      | 0.432294  | 0.744198  |
| XLOC_006939      | 4.0384      | 3.68334   | 0            | 1         | 1         |
| Kcns3_j1         | 2.04278     | 1.06504   | 0            | 1         | 1         |
| Kcns3_j2         | 0.000848281 | 2.04478   | 0            | 1         | 1         |
| Kcns3_j3         | 8.34674     | 2.32384   | 0            | 1         | 1         |
| Gen1_j1          | 0           | 0.0848448 | 1.79769e+308 | 0.0147101 | 1         |
| Ddx1_j3          | 6.32023     | 7.40089   | 0            | 1         | 1         |
| Lpin1_j2         | 0.309992    | 0.479076  | 0            | 1         | 1         |
| Lpin1_j5         | 0.294021    | 0.467672  | 0            | 1         | 1         |
| Atp6v1c2_j1      | 0.0956263   | 0.212778  | 1.15387      | 0.002478  | 0.0296324 |
| Ywhaq_j1         | 120.815     | 126.319   | 0.0642707    | 0.464636  | 0.764867  |
| XLOC_006968      | 0.0663029   | 0.137035  | 1.0474       | 0.275846  | 1         |
| Rnf144a_j1       | 0           | 0.108641  | 0            | 1         | 1         |
| AK163447_j1      | 0.0188767   | 0.131727  | 2.80288      | 0.0075595 | 1         |
| Rps7_j3          | 0.125027    | 0.197894  | 0.662479     | 0.363013  | 0.697185  |
| Ttc15_j1         | 0.675039    | 0.543107  | 0            | 1         | 1         |
| Acp1_j2          | 0.30533     | 0.213938  | -0.513175    | 0.242172  | 0.589626  |
| Cbll1_j1         | 0.0780042   | 0.33179   | 0            | 1         | 1         |
| Dus4l_j1         | 0           | 0.0932458 | 0            | 1         | 1         |
| Dus4l            | 1.4629      | 1.72894   | 0            | 1         | 1         |
| AK016682_j5      | 0           | 0.127728  | 1.79769e+308 | 0.0632477 | 1         |
| F730043M19Rik_j2 | 0.455469    | 0.413418  | -0.139753    | 0.691274  | 0.885697  |
| Hdac9_j1         | 1.11224     | 1.62721   | 0            | 1         | 1         |
| Hdac9_j4         | 0           | 0.170951  | 0            | 1         | 1         |

|                   |            |                        |            |           |           |
|-------------------|------------|------------------------|------------|-----------|-----------|
| Hdac9_j5          | 0.0711462  | 0.155703               | 0          | 1         | 1         |
| Hdac9_j15         | 0.501923   | 0.634953               | 0          | 1         | 1         |
| Stxbp6_j1         | 1.0761     | 0.243324               | 0          | 1         | 1         |
| Stxbp6_j2         | 0          | 0.377353               | 0          | 1         | 1         |
| Strn3             | 0.454958   | 0.436869               | 0          | 1         | 1         |
| Hectd1_j2         | 2.62881    | 1.84228                | 0          | 1         | 1         |
| Hectd1_j1         | 1.37372    | 1.8608                 | 0          | 1         | 1         |
| Heatr5a_j5        | 2.69962    | 2.09881                | -0.363182  | 0.0417557 | 0.230484  |
| Snx6_j3           | 14.1146    | 15.5463                | 0          | 1         | 1         |
| Cfl2_j1           | 46.2819    | 41.92                  | 0          | 1         | 1         |
| Baz1a_j2          | 0.11478    | 0 -1.79769e+308        | 0.0007598  |           | 1         |
| Baz1a_j3          | 0.165584   | 0.359363               | 1.11788    | 0.0007738 | 0.0116588 |
| Ppp2r3c           | 5.78725    | 5.85101                | 0          | 1         | 1         |
| Ralgapa1_j12      | 23.2718    | 23.3729                | 0.00625221 | 0.954439  | 0.986881  |
| Ralgapa1_j14      | 0.112157   | 0.105565               | -0.0873809 | 0.858001  | 1         |
| Mdga2_j5          | 0          | 0.0836843 1.79769e+308 | 0.0362288  |           | 1         |
| Rps29_j1          | 0.569145   | 0.641187               | 0.17195    | 0.786604  | 0.928645  |
| Pole2             | 0.126607   | 0.279914               | 0          | 1         | 1         |
| Sdccag1           | 9.52554    | 9.28124                | 0          | 1         | 1         |
| Cdkl1_j6          | 0.179439   | 0.445973               | 1.31346    | 0.103947  | 0.399846  |
| Cdkl1_j2          | 0.208553   | 0.116259               | -0.843069  | 0.343211  | 0.683127  |
| Map4k5_j1         | 2.75052    | 3.06911                | 0          | 1         | 1         |
| mKIAA1565_j11     | 0.944677   | 0.979441               | 0.0521376  | 0.806402  | 0.935978  |
| Trim9_j5          | 0.324297   | 0.207732               | 0          | 1         | 1         |
| Trim9_j7          | 0.840308   | 1.29464                | 0          | 1         | 1         |
| Rtn1_j7           | 2.40136    | 1.76797                | 0          | 1         | 1         |
| 4930447C04Rik_j13 | 0.322561   | 0.637379               | 0.98258    | 0.0248506 | 0.163552  |
| 4930447C04Rik_j14 | 0.762808   | 0.780269               | 0.0326513  | 0.918306  | 0.974532  |
| 4930447C04Rik_j18 | 0          | 0.284718 1.79769e+308  | 0.0066877  |           | 0.0635533 |
| Trmt5_j4          | 0.0304273  | 0.0877023              | 1.52725    | 0.0894816 | 1         |
| Gphb5             | 0.0933671  | 0.382246               | 2.03351    | 0.0004628 | 0.0076395 |
| Zbtb25_j1         | 0.0288088  | 0.0788252              | 1.45215    | 0.0932825 | 1         |
| Zbtb25_j2         | 0.0390555  | 0.216656               | 2.47181    | 0.0003116 | 0.0055108 |
| Tmem229b_j1       | 0.327645   | 1.01037                | 0          | 1         | 1         |
| Vti1b_j3          | 5.58504    | 0                      | 0          | 1         | 1         |
| Zfyve26_j2        | 1.1048     | 1.1334                 | 0          | 1         | 1         |
| Actn1_j1          | 2.20727    | 2.46672                | 0          | 1         | 1         |
| Slc8a3            | 2.92229    | 2.21012                | 0          | 1         | 1         |
| Med6_j1           | 5.4598     | 5.37205                | 0          | 1         | 1         |
| Med6_j2           | 0.170125   | 0.518013               | 0          | 1         | 1         |
| XLOC_007105       | 0.00795231 | 0.108841               | 3.77471    | 0.515031  | 1         |
| XLOC_007105       | 0.200377   | 0.195606               | -0.0347605 | 0.949721  | 0.985412  |
| XLOC_007106       | 0          | 0.362804 1.79769e+308  |            | 1.53E-05  | 0.0004464 |
| Dpf3_j1           | 0.349691   | 0.127826               | -1.45189   | 0.184362  | 0.524849  |
| C130039O16Rik     | 1.1485     | 1.42337                | 0          | 1         | 1         |
| Fam161b_j2        | 1.62889    | 1.75466                | 0.107302   | 0.611418  | 0.846943  |
| Entpd5_j1         | 0          | 0.0599346 1.79769e+308 | 0.0288139  |           | 1         |

|                  |            |           |              |           |           |
|------------------|------------|-----------|--------------|-----------|-----------|
| Abcd4_j3         | 0.645464   | 0.766223  | 0            | 1         | 1         |
| Ltbp2_j2         | 0.222158   | 0.111916  | -0.989173    | 0.119419  | 0.429997  |
| Ltbp2_j3         | 0          | 0.0826474 | 1.79769e+308 | 0.0120613 | 1         |
| 1110018G07Rik_j4 | 2.44349    | 2.71163   | 0            | 1         | 1         |
| Prox2_j1         | 0.155507   | 0.137055  | -0.182217    | 0.662052  | 0.871836  |
| Prox2_j2         | 0.455437   | 0.407211  | -0.161476    | 0.625967  | 0.854009  |
| Pgf_j3           | 0.946547   | 0.813328  | -0.218837    | 0.612006  | 0.847187  |
| Mlh3_j1          | 1.03961    | 1.42256   | 0            | 1         | 1         |
| Mlh3_j2          | 0          | 0.709919  | 0            | 1         | 1         |
| Nek9_j5          | 0.0726581  | 0.045993  | 0            | 1         | 1         |
| Tmed10           | 0.150058   | 0.905139  | 0            | 1         | 1         |
| Angel1_j2        | 4.4591     | 4.71652   | 0            | 1         | 1         |
| Tmed8_j1         | 0.208875   | 0.262854  | 0            | 1         | 1         |
| Vipar_j3         | 0.294997   | 0.590047  | 1.00013      | 0.0014486 | 0.0191817 |
| lsm2_j5          | 0.105656   | 0.26238   | 1.31228      | 0.0449319 | 0.242254  |
| 4930534B04Rik_j1 | 0.140195   | 0.152689  | 0.123165     | 0.840365  | 0.949524  |
| Gtf2a1_j5        | 6.34838    | 7.778     | 0            | 1         | 1         |
| Ston2_j3         | 1.04133    | 1.08084   | 0            | 1         | 1         |
| Ptpn21           | 0.00643517 | 0.589586  | 0            | 1         | 1         |
| XLOC_007164      | 0.00738351 | 0.151765  | 4.36139      | 0.352857  | 1         |
| Ttc7b_j6         | 2.92277    | 0.806491  | 0            | 1         | 1         |
| Rps6ka5_j1       | 0.327284   | 0.252314  | 0            | 1         | 1         |
| Ccdc88c_j1       | 0          | 0.132727  | 1.79769e+308 | 0.003398  | 1         |
| Fbln5_j1         | 19.4527    | 17.1324   | 0            | 1         | 1         |
| Atxn3_j5         | 2.48656    | 2.03478   | 0            | 1         | 1         |
| ltpk1_j2         | 0          | 0.911138  | 0            | 1         | 1         |
| ltpk1_j3         | 2.65478    | 1.80534   | 0            | 1         | 1         |
| Btbd7_j1         | 2.30019    | 2.46674   | 0            | 1         | 1         |
| Asb2_j4          | 0.584872   | 0.535342  | -0.12766     | 0.848423  | 0.952095  |
| 4831426l19Rik_j2 | 0.00304615 | 0.049267  | 0            | 1         | 1         |
| Bcl11b_j3        | 0          | 0.0660756 | 0            | 1         | 1         |
| XLOC_007213      | 0.123669   | 0.0915175 | -0.434363    | 0.568191  | 1         |
| XLOC_007213      | 0.637022   | 0.505697  | -0.333069    | 0.233233  | 0.580492  |
| Cdc42bpb_j2      | 0.60224    | 0.708938  | 0            | 1         | 1         |
| Cdc42bpb_j1      | 0.622266   | 0.548275  | 0            | 1         | 1         |
| 5033406O09Rik    | 0.0856351  | 0.220405  | 1.36388      | 0.196279  | 0.539086  |
| 5033406O09Rik_j2 | 0.125014   | 0.104582  | -0.257453    | 0.840416  | 1         |
| 2010107E04Rik_j1 | 80.0387    | 75.0765   | -0.0923362   | 0.431717  | 0.743753  |
| XLOC_007229      | 0.0488536  | 0.156174  | 1.67662      | 0.135144  | 1         |
| Tmem179_j4       | 0          | 0.284632  | 0            | 1         | 1         |
| Akt1_j1          | 1.67667    | 4.96183   | 1.56527      | 1.72E-13  | 2.76E-11  |
| Jag2_j2          | 0.0026727  | 0.566265  | 0            | 1         | 1         |
| Jag2_j3          | 0.361363   | 0.614606  | 0            | 1         | 1         |
| abParts_j2       | 0.0269199  | 0.135977  | 0            | 1         | 1         |
| abParts_j8       | 0.508357   | 0.606491  | 0            | 1         | 1         |
| abParts_j9       | 0.0063512  | 0.172545  | 0            | 1         | 1         |
| abParts_j12      | 7.72717    | 11.0757   | 0            | 1         | 1         |

|                  |           |           |              |           |           |
|------------------|-----------|-----------|--------------|-----------|-----------|
| Kif3c_j1         | 18.612    | 18.9487   | 0            | 1         | 1         |
| Dtnb_j6          | 0.598551  | 1.4408    | 1.26733      | 8.06E-08  | 4.45E-06  |
| Dtnb_j7          | 0.241699  | 1.14445   | 2.24336      | 2.17E-05  | 0.0005914 |
| Dnmt3a_j2        | 0         | 0.0519796 | 0            | 1         | 1         |
| Dnmt3a_j4        | 0.108577  | 0.0289611 | 0            | 1         | 1         |
| Dnmt3a_j7        | 0.165862  | 0.375573  | 0            | 1         | 1         |
| Dnmt3a_j11       | 1.00134   | 0.515764  | 0            | 1         | 1         |
| Dnajc27_j1       | 0.216591  | 0.0975983 | 0            | 1         | 1         |
| XLOC_006548      | 0.162729  | 0.161965  | -0.00678361  | 0.993856  | 0.99826   |
| XLOC_006549      | 0.0617435 | 0.0816688 | 0.403497     | 0.679527  | 1         |
| Itsn2_j4         | 0.231941  | 0.272857  | 0.234385     | 0.532585  | 0.804349  |
| Itsn2_j5         | 7.21707   | 6.88217   | -0.0685491   | 0.52679   | 0.801217  |
| Atad2b_j7        | 0.254383  | 0.427398  | 0            | 1         | 1         |
| 2810032G03Rik_j1 | 0.727022  | 0.787595  | 0            | 1         | 1         |
| XLOC_006557      | 0.211713  | 0.216636  | 0.0331675    | 0.964623  | 0.989999  |
| Pum2_j4          | 1.12078   | 0.774123  | 0            | 1         | 1         |
| Pum2_j12         | 1.50279   | 1.54178   | 0            | 1         | 1         |
| Sdc1_j4          | 2.80388   | 6.09765   | 1.12083      | 2.67E-10  | 2.48E-08  |
| Laptm4a_j3       | 0         | 3.3072    | 1.79769e+308 | 1.96E-06  | 7.45E-05  |
| XLOC_006574      | 0.131137  | 0.17756   | 0.437225     | 0.469505  | 0.767555  |
| Fam49a_j1        | 0.172882  | 0.506552  | 0            | 1         | 1         |
| XLOC_006581      | 0         | 0.0978595 | 1.79769e+308 | 0.0676003 | 1         |
| XLOC_006586      | 0.0192508 | 0.117355  | 2.60789      | 0.295031  | 1         |
| E2f6_j3          | 0.174519  | 0.237543  | 0            | 1         | 1         |
| Odc1_j7          | 2.91081   | 5.10893   | 0.811602     | 6.82E-06  | 0.0002225 |
| Hpcal1           | 2.41429   | 5.58601   | 1.21022      | 1         | 1         |
| Hpcal1_j4        | 53.0526   | 59.4245   | 0.163634     | 0.164707  | 0.500749  |
| BC031503_j3      | 3.45152   | 4.06127   | 0.234697     | 0.355965  | 0.691825  |
| EG245297_j1      | 0         | 0.186313  | 1.79769e+308 | 0.0162977 | 0.122048  |
| XLOC_006601      | 0.263458  | 0.254429  | -0.0503103   | 0.964953  | 0.990054  |
| AK149188         | 0.531572  | 0.450762  | -0.237897    | 0.504667  | 0.787836  |
| Asap2            | 1.58691   | 1.57075   | -0.014761    | 0.925407  | 0.976852  |
| lah1_j1          | 2.69366   | 5.34507   | 0.988643     | 0.0067528 | 0.0640061 |
| lah1_j2          | 0.892057  | 1.17489   | 0.397324     | 0.0678252 | 0.311768  |
| XLOC_006612      | 0.284565  | 0.586963  | 1.04451      | 0.0001958 | 0.0037747 |
| Klf11_j2         | 0.613884  | 1.60782   | 0            | 1         | 1         |
| Myt1l            | 1.82349   | 1.11751   | 0            | 1         | 1         |
| Myt1l            | 3.96113   | 3.29544   | 0            | 1         | 1         |
| Pxdn_j10         | 1.77649   | 1.93718   | 0            | 1         | 1         |
| Fam150b_j1       | 18.5384   | 19.0201   | 0.0370058    | 0.702939  | 0.891214  |
| Sypl_j1          | 7.94618   | 8.2269    | 0.0500876    | 0.815483  | 0.939924  |
| Atxn7l1_j5       | 0.620525  | 0.575284  | -0.109214    | 0.69249   | 0.886124  |
| Atxn7l1_j4       | 0.0734772 | 0.0581629 | -0.337198    | 0.683964  | 1         |
| Efcab10_j1       | 0.755169  | 1.2382    | 0.713372     | 0.347482  | 0.68608   |
| Dgkb_j4          | 0.524307  | 0.711865  | 0            | 1         | 1         |
| Etv1_j8          | 1.22681   | 0.758374  | -0.693926    | 0.397695  | 0.722084  |
| lmp2l_j1         | 3.14271   | 3.10514   | -0.017352    | 0.9531    | 0.986399  |

|                  |           |           |              |           |           |
|------------------|-----------|-----------|--------------|-----------|-----------|
| Nrcam_j6         | 0.206828  | 0.518142  | 0            | 1         | 1         |
| XLOC_006658      | 1.83E-05  | 0.0791423 | 12.0809      | 0.983756  | 1         |
| XLOC_006658      | 0.0335567 | 0.122961  | 1.87353      | 0.160333  | 1         |
| G2e3             | 0.263606  | 0.429115  | 0.702984     | 0.257915  | 0.606586  |
| XLOC_006664      | 0.0654332 | 0.0682152 | 0.06007      | 0.946425  | 1         |
| Akap6_j2         | 11.189    | 13.0421   | 0            | 1         | 1         |
| Srp54a_j1        | 4.34786   | 4.60446   | 0            | 1         | 1         |
| Srp54a_j2        | 9.06464   | 12.3846   | 0            | 1         | 1         |
| Srp54a_j4        | 0.263131  | 0.196581  | 0            | 1         | 1         |
| Sip1_j1          | 0.151944  | 0.192965  | 0.344794     | 0.736742  | 0.907294  |
| Ctage5_j4        | 1.76285   | 2.90114   | 0.718707     | 0.0007272 | 0.011075  |
| XLOC_006684      | 0.135914  | 0.161038  | 0.244707     | 0.667847  | 0.87439   |
| Lrfn5_j4         | 11.2429   | 11.5481   | 0            | 1         | 1         |
| Prpf39_j1        | 1.5042    | 1.36601   | 0            | 1         | 1         |
| Fancm_j4         | 1.03459   | 0.802253  | -0.366935    | 0.0940956 | 0.377895  |
| Atp5s_j1         | 2.53463   | 3.22775   | 0            | 1         | 1         |
| Atl1_j4          | 1.12296   | 1.17247   | 0            | 1         | 1         |
| Psm3_j5          | 0.0586229 | 0.074844  | 0.352423     | 0.752006  | 1         |
| Psm3_j7          | 0.852283  | 0.810386  | -0.0727244   | 0.882543  | 0.962629  |
| 2700049A03Rik_j4 | 0         | 0.0676919 | 0            | 1         | 1         |
| 2700049A03Rik_j3 | 0         | 0.169747  | 0            | 1         | 1         |
| Dact1_j1         | 0         | 0.0957131 | 1.79769e+308 | 0.0141499 | 1         |
| Ppm1a_j2         | 0         | 0.0668823 | 1.79769e+308 | 0.116147  | 1         |
| XLOC_006721      | 0.114842  | 0.12949   | 0.173193     | 0.788867  | 1         |
| Mnat1_j1         | 0.0540625 | 0.0812637 | 0            | 1         | 1         |
| Slc38a6_j1       | 1.49799   | 2.24211   | 0.581824     | 0.0020969 | 0.0259539 |
| Hif1a_j2         | 0         | 0.201172  | 0            | 1         | 1         |
| Syne2_j8         | 0.0403393 | 0.114614  | 1.50653      | 0.0013088 | 1         |
| Akap5            | 0.0892108 | 0.0812365 | -0.13509     | 0.860958  | 1         |
| Fut8_j3          | 5.34946   | 4.25331   | 0            | 1         | 1         |
| Fut8_j4          | 0.994782  | 2.4359    | 0            | 1         | 1         |
| Gphn_j1          | 0.349704  | 0.247045  | 0            | 1         | 1         |
| Gphn_j3          | 4.57333   | 4.42871   | 0            | 1         | 1         |
| XLOC_006745      | 0.255681  | 0.297722  | 0.219624     | 0.782079  | 0.926378  |
| Exd2_j2          | 0.538776  | 0.5074    | -0.0865633   | 0.83966   | 0.949168  |
| Galnt1           | 0.905133  | 1.57059   | 0            | 1         | 1         |
| 4933426M11Rik_j5 | 0         | 0.0818818 | 0            | 1         | 1         |
| Srsf5_j6         | 0.233145  | 0.248839  | 0.0939822    | 0.897522  | 0.967361  |
| Smoc1_j2         | 0.935149  | 0.982051  | 0            | 1         | 1         |
| Smoc1_j4         | 0         | 0.163565  | 0            | 1         | 1         |
| Pcnx_j2          | 0.117102  | 0.0814358 | 0            | 1         | 1         |
| Rbm25_j2         | 1.8198    | 3.48729   | 0.938322     | 0.0001246 | 0.0025779 |
| Psen1_j1         | 9.18781   | 8.02686   | 0            | 1         | 1         |
| Dnalc1_j2        | 0.291509  | 0.122507  | 0            | 1         | 1         |
| Zfp410_j4        | 1.2947    | 1.10731   | -0.225564    | 0.291927  | 0.638801  |
| Zfp410_j3        | 1.57968   | 3.06434   | 0.955939     | 3.32E-09  | 2.53E-07  |
| Isca2_j1         | 2.439     | 4.07983   | 0.742219     | 0.02279   | 0.154198  |

|                  |           |           |              |           |           |
|------------------|-----------|-----------|--------------|-----------|-----------|
| XLOC_006782      | 0.0821094 | 0.0778338 | 0            | 1         | 1         |
| XLOC_006783      | 0.102405  | 0.135987  | 0.409187     | 0.538204  | 1         |
| XLOC_006783      | 0.0635049 | 0.145159  | 1.19269      | 0.233803  | 1         |
| TtlI5_j3         | 0.90292   | 0.482506  | -0.90405     | 0.0065477 | 0.0625462 |
| Nrxn3_j23        | 1.80387   | 3.20804   | 0            | 1         | 1         |
| Flrt2            | 0.0875094 | 0.527943  | 0            | 1         | 1         |
| Zc3h14_j2        | 1.18188   | 0.751523  | 0            | 1         | 1         |
| Ttc8_j3          | 1.11176   | 1.18748   | 0.0950691    | 0.811357  | 0.938053  |
| Psmc1_j3         | 0         | 0.469051  | 0            | 1         | 1         |
| XLOC_006822      | 16.1162   | 18.8587   | 0.226713     | 0.0828937 | 0.350922  |
| 9030617003Rik    | 0.750435  | 0.672013  | -0.159238    | 0.650776  | 0.86597   |
| 9030617003Rik_j2 | 0.796717  | 0.841992  | 0.079739     | 0.814352  | 0.939438  |
| 9030617003Rik_j1 | 0.228942  | 0.453094  | 0.984826     | 0.122009  | 0.435016  |
| Rin3_j1          | 0.469727  | 0.278951  | -0.751813    | 0.0834742 | 0.352255  |
| Unc79_j6         | 0.0287949 | 0.11897   | 2.04671      | 0.343859  | 1         |
| Unc79_j12        | 0         | 0.0634554 | 1.79769e+308 | 0.0024531 | 1         |
| Unc79_j17        | 1.70026   | 1.89873   | 0.159283     | 0.648337  | 0.864614  |
| Ifi2711_j3       | 8.42302   | 9.19068   | 0.125833     | 0.606943  | 0.845186  |
| Serpina3g_j2     | 3.14499   | 4.3412    | 0            | 1         | 1         |
| XLOC_006839      | 0.377947  | 0.401864  | 0            | 1         | 1         |
| XLOC_006842      | 0.114718  | 0.193789  | 0.756394     | 1         | 1         |
| XLOC_006842      | 0.169346  | 0.218078  | 0.364867     | 0.402319  | 0.725446  |
| D430019H16Rik_j1 | 5.54046   | 10.8176   | 0.965307     | 0         | 0         |
| Papola_j2        | 0.223538  | 0.266118  | 0            | 1         | 1         |
| Hhip1_j3         | 0.0620305 | 0.304504  | 0            | 1         | 1         |
| Slc25a47_j5      | 0.0697337 | 0.334819  | 2.26345      | 0.0175751 | 0.128649  |
| XLOC_006864      | 0.119372  | 0.127613  | 0.0963154    | 0.882183  | 1         |
| Meg3_j1          | 62.2678   | 84.085    | 0            | 1         | 1         |
| Meg3_j2          | 63.8499   | 94.331    | 0            | 1         | 1         |
| Meg3_j7          | 3.64301   | 4.80416   | 0            | 1         | 1         |
| Meg3_j8          | 34.5637   | 36.2715   | 0            | 1         | 1         |
| Rian_j4          | 17.1561   | 18.4965   | 0            | 1         | 1         |
| Mirg_j3          | 0         | 0.0656909 | 1.79769e+308 | 0.0676185 | 1         |
| Mirg_j4          | 0         | 0.0716577 | 1.79769e+308 | 0.0715522 | 1         |
| Mirg_j5          | 0.672199  | 0.690126  | 0.0379697    | 0.936784  | 0.980653  |
| Mirg_j14         | 0         | 0.0834893 | 1.79769e+308 | 0.223809  | 1         |
| XLOC_006875      | 0.0916513 | 0.136353  | 0.573121     | 0.503009  | 1         |
| Zfp839_j5        | 0.407386  | 0.550359  | 0.433978     | 0.287448  | 0.635587  |
| 1200009I06Rik_j6 | 0.540231  | 0.789945  | 0.548176     | 0.302508  | 0.648495  |
| Eif5_j1          | 32.236    | 34.9438   | 0            | 1         | 1         |
| Klc1_j5          | 33.4799   | 41.0144   | 0            | 1         | 1         |
| Zfyve21          | 1.819     | 1.66496   | 0            | 1         | 1         |
| Kif26a_j2        | 0.0234341 | 0.0634651 | 1.43735      | 0.14503   | 1         |
| Kif26a_j6        | 0.603643  | 0.472084  | -0.354654    | 0.505736  | 0.788505  |
| Inf2             | 0.569759  | 2.23848   | 0            | 1         | 1         |
| Adssl1_j1        | 0.210155  | 0.243626  | 0.213214     | 0.798574  | 0.933125  |
| Zbtb42_j3        | 0         | 0.0892534 | 1.79769e+308 | 0.0361114 | 1         |



|                  |           |            |               |           |           |
|------------------|-----------|------------|---------------|-----------|-----------|
| AW555464_j6      | 2.08543   | 1.68011    | -0.311788     | 0.235102  | 0.582306  |
| Btbd6_j1         | 8.55686   | 9.23431    | 0.109923      | 0.364944  | 0.698811  |
| Pacs2_j1         | 0.195337  | 0.286532   | 0             | 1         | 1         |
| Pacs2_j3         | 0         | 0.0796644  | 0             | 1         | 1         |
| Mta1_j6          | 0         | 0.0503658  | 0             | 1         | 1         |
| Zfp386_j1        | 5.59471   | 5.96025    | 0.0913099     | 0.532971  | 0.804708  |
| Ptprn2_j5        | 4.90207   | 5.57684    | 0             | 1         | 1         |
| XLOC_006917      | 0.0475635 | 0.0937185  | 0.97848       | 0.538915  | 1         |
| Fkbp1b_j2        | 4.89226   | 6.07223    | 0             | 1         | 1         |
| Mfsd2b_j9        | 0.0608508 | 0.0949977  | 0             | 1         | 1         |
| Slc7a15_j4       | 0.14147   | 0.180356   | 0.35035       | 0.647267  | 0.864068  |
| Slc7a15          | 0.0756981 | 0.0471874  | -0.681857     | 0.524505  | 1         |
| Ddx1_j2          | 10.4527   | 13.9378    | 0             | 1         | 1         |
| Trib2_j6         | 0         | 0.20483    | 0             | 1         | 1         |
| Greb1_j6         | 0         | 0.0675237  | 1.79769e+308  | 0.0032342 | 1         |
| Greb1_j5         | 0.0081251 | 0.0638983  | 2.97532       | 0.0198582 | 1         |
| 1700030C10Rik    | 3.34513   | 2.46142    | -0.442574     | 0.0293853 | 0.183133  |
| XLOC_006966      | 0.811141  | 1.58407    | 0.965613      | 0.118822  | 0.428894  |
| XLOC_006968      | 0.122518  | 0.151396   | 0.305335      | 0.7146    | 1         |
| XLOC_006968      | 0.617652  | 0.592007   | -0.0611819    | 0.870262  | 0.958714  |
| Rnf144a_j4       | 5.44919   | 4.62368    | 0             | 1         | 1         |
| Sntg2_j3         | 0.0606305 | 0.242254   | 1.99841       | 0.187642  | 0.528653  |
| Hdac9_j10        | 0.0676962 | 0.133674   | 0             | 1         | 1         |
| Hdac9_j11        | 0.078623  | 0.00732812 | 0             | 1         | 1         |
| Hdac9_j13        | 0.546629  | 0.726809   | 0             | 1         | 1         |
| Bzw2_j1          | 0.0205848 | 3.11573    | 0             | 1         | 1         |
| Bzw2_j2          | 9.05452   | 7.72825    | 0             | 1         | 1         |
| lfrd1_j1         | 8.21476   | 11.8208    | 0.525043      | 0.0001255 | 0.0025923 |
| Hectd1_j13       | 3.22495   | 5.90737    | 0             | 1         | 1         |
| Heatr5a          | 0.41037   | 0.380729   | -0.108158     | 0.717521  | 0.898161  |
| Heatr5a_j6       | 0.861626  | 0.50985    | -0.756987     | 0.0026239 | 0.0309809 |
| Egln3_j2         | 0.26082   | 0.376211   | 0.528486      | 0.362051  | 0.69637   |
| 1110002B05Rik_j2 | 6.90108   | 7.67817    | 0.153939      | 0.455351  | 0.759162  |
| Snx6_j2          | 17.3712   | 21.5271    | 0             | 1         | 1         |
| Baz1a_j1         | 0.0245069 | 0.105188   | 2.10172       | 0.0090128 | 1         |
| Ppp2r3c_j1       | 4.08076   | 4.13744    | 0             | 1         | 1         |
| Ralgapa1_j9      | 0.552991  | 0.316729   | -0.804008     | 0.0069068 | 0.0651617 |
| Ralgapa1_j7      | 0.0832812 | 0          | -1.79769e+308 | 2.49E-05  | 1         |
| Ralgapa1_j8      | 0.931797  | 0.991653   | 0.089821      | 0.667563  | 0.874313  |
| Mdga2_j4         | 0.0976054 | 0.153247   | 0             | 1         | 1         |
| Mdga2_j7         | 0.0102655 | 0.054163   | 2.3995        | 0.278259  | 1         |
| Mdga2_j6         | 0.0118635 | 0.0545435  | 2.20088       | 0.29416   | 1         |
| 1110034A24Rik_j2 | 2.37577   | 5.15454    | 0             | 1         | 1         |
| Pole2_j4         | 0.0264017 | 0.085772   | 0             | 1         | 1         |
| Sdccag1_j3       | 27.0224   | 24.0825    | 0             | 1         | 1         |
| Sos2_j3          | 4.23938   | 4.25397    | 0.00495493    | 0.978271  | 0.993756  |
| L2hgdh           | 0.0839384 | 0.251756   | 1.58463       | 0.0234508 | 0.157087  |

|                  |            |           |               |           |           |
|------------------|------------|-----------|---------------|-----------|-----------|
| Cdkl1_j7         | 0.0623587  | 0.0419722 | -0.571155     | 0.70585   | 1         |
| mKIAA1565_j6     | 0.176536   | 0.220504  | 0.320841      | 0.386434  | 0.714571  |
| Trim9_j2         | 1.77386    | 2.19956   | 0             | 1         | 1         |
| AK015004_j1      | 0.239565   | 0.609475  | 0             | 1         | 1         |
| Timm9_j1         | 0          | 0.0585995 | 1.79769e+308  | 0.223621  | 1         |
| 2810055F11Rik_j3 | 0.0177768  | 0.111081  | 2.64354       | 0.0587265 | 1         |
| 4930447C04Rik_j5 | 1.61315    | 2.07296   | 0.361815      | 0.384111  | 0.71322   |
| 4930447C04Rik_j6 | 0.11533    | 0         | -1.79769e+308 | 0.0014671 | 1         |
| 4930447C04Rik_j7 | 0.163814   | 0.265068  | 0.694303      | 0.207967  | 0.552233  |
| Trmt5_j5         | 1.12223    | 1.17214   | 0.0627722     | 0.842773  | 0.950279  |
| Sgpp1_j1         | 20.2753    | 18.5548   | 0             | 1         | 1         |
| Tmem229b_j3      | 16.2042    | 19.937    | 0             | 1         | 1         |
| Pigh_j1          | 3.8453     | 4.60683   | 0             | 1         | 1         |
| Actn1_j2         | 4.65004    | 5.03459   | 0             | 1         | 1         |
| Actn1_j3         | 0.184855   | 0.401631  | 0             | 1         | 1         |
| Erh_j2           | 20.0169    | 24.2208   | 0             | 1         | 1         |
| Med6_j9          | 1.83229    | 1.61951   | 0             | 1         | 1         |
| Dpf3_j3          | 0          | 0.228908  | 1.79769e+308  | 0.0290243 | 0.181523  |
| Zfyve1_j3        | 4.82433    | 5.64862   | 0             | 1         | 1         |
| Zfyve1_j4        | 3.04585    | 3.2841    | 0             | 1         | 1         |
| Entpd5_j6        | 0.638047   | 0.757498  | 0.247579      | 0.393269  | 0.719167  |
| Ltbp2_j5         | 0.10958    | 0.0845437 | -0.374211     | 0.66922   | 1         |
| Ltbp2_j7         | 0.0376245  | 0.180528  | 2.26248       | 0.169503  | 0.50647   |
| MIh3_j5          | 0.0644299  | 0.0594752 | 0             | 1         | 1         |
| Nek9_j3          | 12.931     | 13.8001   | 0             | 1         | 1         |
| Tmed10           | 17.3662    | 8.93587   | 0             | 1         | 1         |
| lsm2_j7          | 0.0392894  | 0.136714  | 1.79895       | 0.257968  | 1         |
| XLOC_007151      | 0.0884656  | 0.107736  | 0.284312      | 0.742811  | 1         |
| Gtf2a1_j1        | 0.275863   | 0.285631  | 0             | 1         | 1         |
| Ston2_j4         | 0.182436   | 0.509994  | 0             | 1         | 1         |
| Sel1l_j1         | 0.202878   | 0.322617  | 0             | 1         | 1         |
| Kcnk10_j1        | 0          | 0.0691551 | 0             | 1         | 1         |
| Ptpn21_j5        | 0.194651   | 0.485575  | 0             | 1         | 1         |
| Ptpn21_j4        | 1.3415     | 1.16144   | 0             | 1         | 1         |
| Foxn3            | 0.0922635  | 0.560367  | 0             | 1         | 1         |
| 2610021K21Rik_j4 | 0.119296   | 0.119203  | -0.00112548   | 0.999376  | 1         |
| Trip11_j4        | 0.30817    | 0.4412    | 0.51771       | 0.0402084 | 0.224574  |
| Prima1_j1        | 0.00149137 | 1.32018   | 0             | 1         | 1         |
| Asb2             | 0.103938   | 0.27986   | 1.42898       | 0.0534038 | 0.268971  |
| Asb2_j1          | 0          | 0.1717    | 1.79769e+308  | 0.004165  | 0.0441687 |
| Serpina10        | 0.127953   | 0.298775  | 1.22345       | 0.0534943 | 0.269262  |
| Dicer1           | 2.44284    | 2.79878   | 0             | 1         | 1         |
| 4831426l19Rik_j1 | 0.105265   | 0.102949  | 0             | 1         | 1         |
| 4831426l19Rik_j6 | 0          | 0.0997859 | 0             | 1         | 1         |
| 4831426l19Rik_j5 | 0.0946598  | 0.016799  | 0             | 1         | 1         |
| XLOC_007201      | 0          | 0.0692913 | 1.79769e+308  | 0.0628842 | 1         |
| Setd3            | 3.15537    | 3.62972   | 0             | 1         | 1         |

|                  |           |           |              |           |           |
|------------------|-----------|-----------|--------------|-----------|-----------|
| Ccdc85c_j3       | 0.551976  | 0.61008   | 0.144395     | 0.687833  | 0.883968  |
| Ccdc85c_j4       | 2.05376   | 0.99704   | -1.04255     | 4.97E-05  | 0.0011876 |
| Degs2            | 0.538714  | 0.367581  | -0.551458    | 0.249327  | 0.596796  |
| Begain_j2        | 0         | 0.529912  | 1.79769e+308 | 9.99E-06  | 0.0003093 |
| Hsp90aa1_j6      | 0.320157  | 0.108696  | 0            | 1         | 1         |
| Stk30_j3         | 0.0691382 | 0.283092  | 2.03372      | 0.0300549 | 0.185998  |
| Stk30_j19        | 0.153462  | 0.0370638 | -2.0498      | 0.314339  | 0.658565  |
| Ppp1r13b_j1      | 3.50086   | 3.83719   | 0            | 1         | 1         |
| 5033406O09Rik_j1 | 0         | 0.107677  | 1.79769e+308 | 0.0725234 | 1         |
| 5033406O09Rik_j3 | 0         | 0.106544  | 1.79769e+308 | 0.0720609 | 1         |
| Brf1_j4          | 4.00571   | 3.61486   | -0.148118    | 0.385473  | 0.714101  |
| Igh-A (1g2)      | 0         | 0.723212  | 0            | 1         | 1         |
| abParts_j13      | 2.47534   | 0.610141  | 0            | 1         | 1         |
| Sp4_j1           | 0         | 0.22642   | 0            | 1         | 1         |
| XLOC_006537      | 0         | 0.0832924 | 1.79769e+308 | 0.203788  | 1         |
| Dtnb_j1          | 5.75201   | 4.67804   | -0.298162    | 0.0963147 | 0.383159  |
| Dtnb_j9          | 0.93645   | 1.29847   | 0.47154      | 0.0301867 | 0.186505  |
| Adcy3_j6         | 2.26491   | 3.12642   | 0            | 1         | 1         |
| XLOC_006548      | 0         | 0.142033  | 1.79769e+308 | 0.0434579 | 1         |
| Itns2_j1         | 2.22933   | 1.69182   | -0.398033    | 0.0100638 | 0.0859291 |
| Pfn4_j2          | 0.496823  | 0.128678  | -1.94897     | 0.012127  | 0.0990007 |
| BC068281_j1      | 0.12745   | 0.301601  | 0            | 1         | 1         |
| BC068281         | 0.303166  | 0.246539  | 0            | 1         | 1         |
| BC068281_j2      | 2.19882   | 1.77194   | 0            | 1         | 1         |
| XLOC_006561      | 0.209974  | 0.303565  | 0            | 1         | 1         |
| Pum2_j13         | 4.65608   | 6.22059   | 0            | 1         | 1         |
| Sdc1_j6          | 2.2858    | 5.04311   | 1.14161      | 3.49E-09  | 2.65E-07  |
| Fam49a_j2        | 0         | 0.587512  | 0            | 1         | 1         |
| Nbas_j10         | 1.74161   | 1.49468   | 0            | 1         | 1         |
| Ntsr2_j4         | 3.06079   | 1.46126   | -1.06669     | 0.0065551 | 0.0625462 |
| Nol10_j4         | 1.00889   | 2.18225   | 0            | 1         | 1         |
| Odc1_j6          | 0.213176  | 0.274205  | 0.363207     | 0.614323  | 0.847685  |
| Odc1_j8          | 0.53154   | 1.26424   | 1.25002      | 0.0232102 | 0.156066  |
| Odc1_j9          | 0.904981  | 1.02602   | 0.181103     | 0.769612  | 0.921491  |
| Odc1_j11         | 0.264295  | 0.217739  | -0.279551    | 0.743594  | 0.910278  |
| Odc1_j13         | 1.01287   | 2.13612   | 1.07655      | 0.0194176 | 0.138091  |
| XLOC_006602      | 0         | 0.0984461 | 0            | 1         | 1         |
| Gm10479_j1       | 0.596583  | 1.09296   | 0            | 1         | 1         |
| Cpsf3_j1         | 0         | 0.398253  | 0            | 1         | 1         |
| Grhl1_j3         | 0         | 0.096599  | 1.79769e+308 | 0.0127049 | 1         |
| Rrm2_j2          | 0.0389052 | 0.110296  | 1.50334      | 0.393892  | 1         |
| Myt1l_j1         | 2.01388   | 2.66696   | 0            | 1         | 1         |
| Pxdn_j13         | 5.45619   | 6.19715   | 0            | 1         | 1         |
| Cog5_j1          | 1.16795   | 1.22861   | 0            | 1         | 1         |
| Nampt_j1         | 0.46976   | 0.866222  | 0.882815     | 0.003905  | 0.0421925 |
| Snx13_j6         | 0.318618  | 0.373843  | 0            | 1         | 1         |
| Snx13_j9         | 0.0535883 | 0.190368  | 0            | 1         | 1         |

|               |             |           |               |           |           |
|---------------|-------------|-----------|---------------|-----------|-----------|
| Etv1_j1       | 0.385418    | 0.173025  | -1.15545      | 0.341803  | 0.681634  |
| G2e3_j2       | 0           | 0.0882315 | 1.79769e+308  | 0.0032609 | 1         |
| Nubpl_j3      | 1.54587     | 1.456     | -0.0864072    | 1         | 1         |
| Ctage5_j7     | 10.0783     | 10.8576   | 0.10746       | 0.525396  | 0.800757  |
| XLOC_006684   | 0.0519631   | 0.0914739 | 0.815873      | 0.485184  | 1         |
| Fam179b_j2    | 5.78442     | 6.15175   | 0.0888226     | 0.627472  | 0.854629  |
| Prpf39_j3     | 9.57075     | 9.13796   | 0             | 1         | 1         |
| Klhdc1_j3     | 0           | 0.150714  | 0             | 1         | 1         |
| XLOC_006699   | 0.0834304   | 0.106445  | 0.351469      | 0.7558    | 1         |
| XLOC_006699   | 0.054088    | 0.151331  | 1.48432       | 0.258913  | 1         |
| XLOC_006699   | 0.0394256   | 0.197104  | 2.32175       | 0.0201546 | 0.141606  |
| XLOC_006699   | 0.114449    | 0.219542  | 0.939795      | 0.503458  | 0.787092  |
| Atp5s_j3      | 2.36125     | 2.04729   | 0             | 1         | 1         |
| Atl1_j3       | 0.0979901   | 0.105258  | 0             | 1         | 1         |
| Atl1_j5       | 12.7041     | 10.8116   | 0             | 1         | 1         |
| Psm3_j10      | 0.91043     | 1.52725   | 0.746312      | 0.004679  | 0.0482856 |
| Arid4a_j2     | 0.595735    | 1.52684   | 0             | 1         | 1         |
| Arid4a_j3     | 1.26384     | 0.836904  | 0             | 1         | 1         |
| Lrrc9_j6      | 0.169876    | 0.160122  | -0.0853105    | 0.876196  | 0.960645  |
| Slc38a6_j5    | 0.0946998   | 0.159798  | 0.754816      | 0.16807   | 0.504739  |
| Syt16_j3      | 0           | 0.0667953 | 0             | 1         | 1         |
| Rhoj1         | 1.65546     | 2.04712   | 0.306361      | 0.280563  | 0.629156  |
| Syne2_j9      | 0.0917195   | 0.0386512 | -1.24671      | 0.353144  | 1         |
| Plekhg3_j3    | 2.66833     | 2.61159   | 0             | 1         | 1         |
| Plekhg3_j4    | 1.12241     | 1.32194   | 0             | 1         | 1         |
| Gphn_j5       | 0           | 0.0789423 | 0             | 1         | 1         |
| Mpp5_j2       | 1.38389     | 2.69027   | 0             | 1         | 1         |
| Plekh1_j1     | 0.186676    | 0.241261  | 0             | 1         | 1         |
| Rad51l1_j1    | 0.0611443   | 0.158006  | 1.36969       | 0.359429  | 0.694666  |
| Exd2_j3       | 7.1316      | 7.64008   | 0.0993611     | 0.503895  | 0.787293  |
| Srsf5_j2      | 0.204607    | 0         | -1.79769e+308 | 0.0002713 | 0.0049278 |
| Rgs6_j2       | 0           | 0.0850007 | 1.79769e+308  | 0.005582  | 1         |
| Rbm25_j1      | 1.06517     | 1.37314   | 0.366399      | 0.155095  | 0.488311  |
| Papln_j2      | 0.585655    | 0.407661  | 0             | 1         | 1         |
| 2410016O06Rik | 1.43497     | 1.31382   | -0.127247     | 0.612412  | 0.847359  |
| Acot2_j1      | 0.335508    | 0.256045  | -0.389949     | 0.544617  | 0.811629  |
| Acot1_j1      | 0.0595351   | 0.0586926 | -0.0205604    | 0.989935  | 1         |
| Fcf1_j1       | 0.0347766   | 0.134474  | 1.95114       | 0.334213  | 1         |
| Fcf1_j3       | 1.59704     | 2.06408   | 0.370099      | 0.306265  | 0.651655  |
| Fcf1_j7       | 0.0980306   | 0.0744892 | -0.396202     | 0.867444  | 1         |
| Dlst_j1       | 34.0578     | 31.2331   | 0             | 1         | 1         |
| Vash1_j2      | 0.811259    | 1.01875   | 0             | 1         | 1         |
| Kiaa1737_j1   | 0.260358    | 0.12422   | 0             | 1         | 1         |
| Tmem63c_j4    | 2.42306     | 4.24992   | 0             | 1         | 1         |
| Gstz1_j1      | 0.0682919   | 0.196754  | 0             | 1         | 1         |
| Adck1_j3      | 0.671515    | 0.942352  | 0             | 1         | 1         |
| Nrxn3_j4      | 0.000143676 | 0.350838  | 11.2538       | 0.898603  | 0.967622  |

|                  |            |                        |            |           |           |
|------------------|------------|------------------------|------------|-----------|-----------|
| Nrxn3_j5         | 0.1021     | 0.237633               | 1.21876    | 0.184724  | 0.52511   |
| Nrxn3_j12        | 0.02962    | 0.0624607              | 1.07638    | 0.577164  | 1         |
| Nrxn3_j19        | 0.145919   | 0.813468               | 0          | 1         | 1         |
| Spata7           | 0.251298   | 0.388308               | 0.627801   | 0.359774  | 0.695002  |
| Tdp1_j1          | 1.15312    | 1.79991                | 0.642381   | 0.175107  | 0.513344  |
| XLOC_006818      | 0.117628   | 0.190204               | 0          | 1         | 1         |
| Kcnk13_j1        | 0          | 0.135353               | 0          | 1         | 1         |
| Psmc1_j5         | 13.7383    | 20.02                  | 0          | 1         | 1         |
| XLOC_006822      | 0          | 0.159458 1.79769e+308  |            | 0.0517135 | 0.263703  |
| Rin3_j3          | 0.0374566  | 0.090694               | 1.27579    | 0.190941  | 1         |
| Rin3_j6          | 0.0734152  | 0.252368               | 1.78138    | 0.011355  | 0.0942007 |
| Ubr7_j1          | 0          | 0.0759962 1.79769e+308 |            | 0.0384638 | 1         |
| Unc79_j14        | 0.0928943  | 0.172352               | 0.891698   | 0.0481429 | 0.252487  |
| Serpina3n_j3     | 0          | 0.126315               | 0          | 1         | 1         |
| XLOC_006842      | 0.063671   | 0.000240772            | -8.04682   | 0.876999  | 1         |
| XLOC_006842      | 0          | 0.092048 1.79769e+308  |            | 0.0437856 | 1         |
| XLOC_006842      | 0.0544542  | 0.11252                | 1.04707    | 0.373288  | 1         |
| Bdkrb2_j1        | 0          | 0.484794 1.79769e+308  |            | 6.91E-07  | 3.01E-05  |
| Hhip1_j4         | 3.76E-05   | 0.355276               | 0          | 1         | 1         |
| Hhip1_j5         | 0.925776   | 1.46677                | 0          | 1         | 1         |
| Eml1_j1          | 0.475939   | 0.166629               | -1.51414   | 0.297278  | 0.643881  |
| Evl_j2           | 14.3048    | 21.2442                | 0.570568   | 3.07E-05  | 0.0007902 |
| Slc25a47_j2      | 0          | 0.0751378 1.79769e+308 |            | 0.0423283 | 1         |
| Wdr25_j3         | 0          | 0.749424               | 0          | 1         | 1         |
| Wdr25_j8         | 0          | 0.312317               | 0          | 1         | 1         |
| XLOC_006868      | 0.0582948  | 0.104799               | 0.846191   | 0.460911  | 1         |
| Ppp2r5c_j3       | 0.358384   | 0.288385               | 0          | 1         | 1         |
| Ppp2r5c_j5       | 0          | 0.780374               | 0          | 1         | 1         |
| Dync1h1_j2       | 7.14156    | 7.15388                | 0.00248661 | 0.978975  | 0.9939    |
| Dync1h1_j8       | 47.9417    | 52.1149                | 0.120412   | 0.170632  | 0.507473  |
| Wdr20a_j1        | 1.17052    | 1.70472                | 0.54239    | 0.0592378 | 0.286057  |
| Wdr20a_j4        | 1.71851    | 1.81068                | 0.0753706  | 0.773302  | 0.923105  |
| Zfp839_j3        | 0.244523   | 0.231698               | -0.077725  | 0.898923  | 0.967647  |
| A230065H16Rik_j1 | 0          | 0.242961 1.79769e+308  |            | 0.0486739 | 0.254145  |
| 1200009I06Rik_j1 | 0.0348281  | 0.0704163              | 1.01566    | 0.530448  | 1         |
| Mark3_j5         | 1.87922    | 1.98811                | 0          | 1         | 1         |
| Mark3_j4         | 6.12791    | 6.25502                | 0          | 1         | 1         |
| Mark3_j8         | 5.90502    | 6.34615                | 0          | 1         | 1         |
| Klc1_j1          | 0.343299   | 0.804068               | 0          | 1         | 1         |
| Klc1_j2          | 3.97279    | 3.84608                | 0          | 1         | 1         |
| Inf2_j3          | 5.24045    | 8.18923                | 0          | 1         | 1         |
| Siva1            | 0.0386855  | 0.420178               | 3.44114    | 0.0756845 | 0.332297  |
| Crip2_j2         | 0.209796   | 0.578349               | 0          | 1         | 1         |
| 4930427A07Rik_j2 | 0.0953793  | 0.200297               | 1.07039    | 0.0995732 | 0.390669  |
| 1110002L01Rik_j2 | 0.929345   | 0.845862               | 0          | 1         | 1         |
| Efr3b_j3         | 0.183178   | 0.129204               | 0          | 1         | 1         |
| Efr3b_j4         | 0.00081089 | 0.208057               | 0          | 1         | 1         |

|             |           |           |              |           |           |
|-------------|-----------|-----------|--------------|-----------|-----------|
| Fkbp1b_j1   | 68.3808   | 73.1833   | 0            | 1         | 1         |
| Mfsd2b_j5   | 0         | 0.0876989 | 0            | 1         | 1         |
| Mfsd2b_j6   | 0.132399  | 0.0830504 | 0            | 1         | 1         |
| Ubxn2a_j6   | 0.152872  | 0.10821   | 0            | 1         | 1         |
| Klhl29_j3   | 0.119245  | 0.162799  | 0            | 1         | 1         |
| XLOC_006939 | 4.34198   | 5.26647   | 0            | 1         | 1         |
| Kcns3_j4    | 0         | 0.668903  | 0            | 1         | 1         |
| Trib2_j3    | 0         | 0.0518728 | 0            | 1         | 1         |
| Greb1_j1    | 0.829444  | 0.870804  | 0.0702028    | 0.820553  | 0.941947  |
| Greb1_j14   | 0.0387095 | 0.0528055 | 0.447998     | 0.80364   | 1         |
| Pqlc3_j1    | 19.774    | 17.0129   | -0.216975    | 0.0828744 | 0.35092   |
| AK148766_j3 | 0.741027  | 0.946529  | 0.353121     | 0.591337  | 0.836971  |
| AK148766_j2 | 2.10203   | 1.94903   | -0.109025    | 0.762388  | 0.918113  |
| Itgb1bp1_j2 | 9.66077   | 10.7908   | 0.159595     | 0.335598  | 0.676288  |
| Ywhaq_j3    | 33.0555   | 39.3485   | 0.251421     | 0.0110386 | 0.0922012 |
| XLOC_006966 | 0.660367  | 1.02645   | 0.636327     | 0.0013648 | 0.0183561 |
| XLOC_006968 | 0.474497  | 1.08484   | 1.19301      | 0.0002682 | 0.0048792 |
| XLOC_006968 | 0         | 0.107796  | 1.79769e+308 | 0.0345145 | 1         |
| AK163447_j3 | 0         | 0.0511359 | 1.79769e+308 | 0.0606896 | 1         |
| AK163447_j4 | 0.752134  | 1.34674   | 0.840408     | 0.0004653 | 0.0076656 |
| XLOC_006980 | 0.0815912 | 0.299541  | 1.87627      | 0.0054514 | 0.0541942 |
| Tpo_j1      | 0.0659639 | 0.135194  | 1.03528      | 0.300404  | 1         |
| Sntg2_j1    | 0         | 0.0706025 | 1.79769e+308 | 0.0496909 | 1         |
| Sntg2_j5    | 0         | 0.124183  | 1.79769e+308 | 0.0428367 | 1         |
| Acp1_j1     | 0.227144  | 0.309543  | 0.446531     | 0.105688  | 0.403795  |
| Cbll1_j3    | 0         | 0.10367   | 0            | 1         | 1         |
| Bcap29_j1   | 0.237215  | 0.41899   | 0.820718     | 0.346384  | 0.685483  |
| Prkar2b_j3  | 0         | 6.4101    | 0            | 1         | 1         |
| AK016682_j1 | 0.0372886 | 0.0847196 | 1.18396      | 0.385642  | 1         |
| Ahr_j1      | 2.21382   | 2.68617   | 0            | 1         | 1         |
| Tspan13_j2  | 8.27744   | 9.11086   | 0            | 1         | 1         |
| Stxbp6_j3   | 0         | 0.943987  | 0            | 1         | 1         |
| Prkd1_j2    | 3.26457   | 3.95615   | 0.277203     | 0.267634  | 0.616352  |
| Strn3_j2    | 5.77324   | 4.77718   | 0            | 1         | 1         |
| Strn3_j3    | 6.21804   | 5.74018   | 0            | 1         | 1         |
| Hectd1_j5   | 2.44639   | 3.11763   | 0            | 1         | 1         |
| Hectd1_j6   | 0.0570884 | 0.134967  | 0            | 1         | 1         |
| Baz1a_j4    | 0.280959  | 0.755862  | 1.42776      | 1         | 1         |
| Baz1a_j7    | 0.0198194 | 0.126148  | 2.67012      | 0.091307  | 1         |
| Baz1a_j9    | 0.0588784 | 0.250136  | 2.0869       | 0.0911388 | 0.371144  |
| Ralgapa1_j3 | 1.88599   | 2.13109   | 0.176271     | 0.467431  | 0.766717  |
| Ralgapa1_j4 | 1.20834   | 1.0565    | -0.193744    | 0.316232  | 0.660027  |
| Sec23a_j2   | 6.26546   | 7.84697   | 0            | 1         | 1         |
| Trappc6b_j1 | 34.7846   | 35.8585   | 0.0438647    | 0.730296  | 0.904755  |
| AK043502_j2 | 0         | 0.0987089 | 1.79769e+308 | 0.0374477 | 1         |
| C79407_j3   | 0         | 0.0602316 | 1.79769e+308 | 0.10496   | 1         |
| Pole2_j1    | 0.0559716 | 0.0268632 | 0            | 1         | 1         |

|                   |             |           |              |           |           |
|-------------------|-------------|-----------|--------------|-----------|-----------|
| Gm71_j3           | 0.225811    | 0.215859  | -0.0650247   | 0.923358  | 0.97612   |
| L2hgdh_j3         | 0.0731615   | 0.0762264 | 0.0592069    | 0.95808   | 1         |
| Cdkl1_j1          | 0           | 0.0593424 | 1.79769e+308 | 0.129546  | 1         |
| mKIAA1565_j7      | 0.0393819   | 0.0892564 | 1.18042      | 0.208868  | 1         |
| Trim9_j3          | 7.84563     | 7.23065   | 0            | 1         | 1         |
| 2810055F11Rik_j1  | 0.368394    | 0.390689  | 0.0847733    | 0.792746  | 0.931005  |
| Rtn1_j6           | 62.0746     | 75.4758   | 0            | 1         | 1         |
| 4930447C04Rik_j10 | 0.0270193   | 0.0841895 | 1.63965      | 0.259059  | 1         |
| 4930447C04Rik_j11 | 0.348449    | 0.113905  | -1.61312     | 0.0196282 | 0.139122  |
| 4930447C04Rik_j12 | 0           | 0.183434  | 1.79769e+308 | 0.0015068 | 0.019802  |
| Gphb5_j1          | 0           | 0.055245  | 1.79769e+308 | 0.102504  | 1         |
| XLOC_007075       | 0.0547309   | 0.178152  | 0            | 1         | 1         |
| Zbtb25_j7         | 0.296244    | 0.393182  | 0.408408     | 0.561423  | 0.821781  |
| Zbtb25_j8         | 0.378477    | 0.659577  | 0.801334     | 0.197675  | 0.540689  |
| Atp6v1d_j1        | 43.4191     | 49.1011   | 0            | 1         | 1         |
| Tmem229b          | 43.3204     | 30.7398   | 0            | 1         | 1         |
| Zfyve26_j5        | 3.06E-05    | 0.155197  | 0            | 1         | 1         |
| AK145430_j2       | 0.0935366   | 0.149433  | 0.675894     | 0.26758   | 1         |
| Slc8a3_j2         | 0.000152772 | 0.816386  | 0            | 1         | 1         |
| Slc8a3_j3         | 0.408381    | 0.34724   | 0            | 1         | 1         |
| XLOC_007106       | 0.165635    | 0.397136  | 1.26162      | 0.0059034 | 0.0577991 |
| XLOC_007106       | 0.0627643   | 0.18097   | 1.52773      | 0.276093  | 0.624922  |
| Numb_j3           | 1.09665     | 0.832315  | 0            | 1         | 1         |
| Tmem90a_j1        | 0.941816    | 1.35653   | 0            | 1         | 1         |
| Tmem90a_j2        | 4.21031     | 4.5911    | 0            | 1         | 1         |
| 1110018G07Rik_j2  | 0.0823341   | 0.12017   | 0            | 1         | 1         |
| 1110018G07Rik_j3  | 2.57552     | 1.9802    | 0            | 1         | 1         |
| Pgf_j1            | 1.72853     | 1.42078   | -0.282865    | 0.340069  | 0.680124  |
| Acyp1_j3          | 4.09032     | 3.35783   | -0.284684    | 0.443095  | 0.751132  |
| Nek9_j1           | 1.68561     | 1.56197   | 0            | 1         | 1         |
| Tmed10_j3         | 0.176386    | 0.0726136 | 0            | 1         | 1         |
| Tmed10_j4         | 0.0574504   | 0.0282464 | 0            | 1         | 1         |
| Ngb               | 0.236755    | 0.341506  | 0.528513     | 0.415205  | 0.733143  |
| Tmed8_j2          | 4.30823     | 3.33563   | 0            | 1         | 1         |
| Vipar_j5          | 13.1667     | 15.1073   | 0.198354     | 0.170485  | 0.507473  |
| Ism2_j2           | 0           | 0.0611857 | 1.79769e+308 | 0.0576106 | 1         |
| Ism2_j3           | 7.97E-06    | 0.0475927 | 12.5443      | 0.986296  | 1         |
| Gtf2a1_j2         | 0.18829     | 0.628942  | 0            | 1         | 1         |
| Kcnk10_j2         | 0.825635    | 0.914945  | 0            | 1         | 1         |
| Ptpn21_j6         | 0           | 0.0915606 | 0            | 1         | 1         |
| XLOC_007164       | 0.0507314   | 0.0476938 | -0.0890766   | 0.959911  | 1         |
| 2610021K21Rik_j2  | 0           | 0.141017  | 1.79769e+308 | 0.0215262 | 1         |
| 2610021K21Rik_j3  | 0.0922923   | 0.177424  | 0.942921     | 0.563025  | 0.822342  |
| BC002230_j3       | 0           | 0.148999  | 1.79769e+308 | 0.0020985 | 1         |
| Atxn3_j1          | 0.113589    | 0.267906  | 0            | 1         | 1         |
| Atxn3_j2          | 0           | 0.0754332 | 0            | 1         | 1         |
| Itpk1_j5          | 0           | 0.326845  | 0            | 1         | 1         |

|                  |            |          |              |           |           |
|------------------|------------|----------|--------------|-----------|-----------|
| Asb2_j2          | 0          | 0.152416 | 1.79769e+308 | 0.0074657 | 1         |
| Ddx24_j1         | 0.675926   | 1.05372  |              | 0 1       | 1         |
| XLOC_007201      | 0          | 0.185822 | 1.79769e+308 | 0.0766624 | 0.334708  |
| Setd3_j4         | 0.533669   | 0        |              | 0 1       | 1         |
| Setd3_j5         | 3.39152    | 3.63689  |              | 0 1       | 1         |
| Setd3            | 7.79524    | 7.26867  |              | 0 1       | 1         |
| Degs2_j1         | 0          | 0.168631 | 1.79769e+308 | 0.0297575 | 0.18472   |
| Hsp90aa1_j5      | 46.1929    | 54.7465  |              | 0 1       | 1         |
| Stk30_j10        | 0.00394198 | 0.17317  | 5.45713      | 0.342893  | 0.682746  |
| Stk30_j11        | 0.298527   | 0.568248 | 0.928661     | 0.115384  | 0.422424  |
| Stk30_j13        | 0          | 0.15443  | 1.79769e+308 | 0.03144   | 1         |
| Ankrd9_j2        | 0.278016   | 0.297024 | 0.0954111    | 0.862386  | 0.956421  |
| Cdc42bpb_j3      | 0.452346   | 0.906118 | 0            | 1         | 1         |
| AK080484_j1      | 0.686156   | 0.536008 | -0.356281    | 0.422112  | 0.738238  |
| Ckb_j2           | 102.318    | 115.654  | 0            | 1         | 1         |
| 5033406O09Rik_j4 | 0.111875   | 0.394882 | 1.81953      | 0.0212644 | 0.146895  |
| Tmem179_j1       | 0          | 0.150225 | 0            | 1         | 1         |
| Jag2_j4          | 0.511125   | 0.588163 | 0            | 1         | 1         |
| Nudt14_j1        | 0.757196   | 0.882077 | 0.220239     | 0.640019  | 0.860827  |
| Brf1_j5          | 2.00174    | 2.63864  | 0.398539     | 0.0779103 | 0.337954  |
| abParts_j16      | 0.0634702  | 1.94914  | 0            | 1         | 1         |
| Wdr60_j3         | 0.52451    | 0.681653 | 0            | 1         | 1         |
| Itgb8_j1         | 3.07325    | 3.63239  | 0            | 1         | 1         |
| 2810429I04Rik_j2 | 0.0963471  | 0.115216 | 0.258022     | 0.779298  | 1         |
| Gdi2_j3          | 52.5282    | 55.351   | 0            | 1         | 1         |
| Asb13            | 5.38556    | 3.2408   | 0            | 1         | 1         |
| Akr1c14          | 1.554      | 1.10454  | -0.492545    | 0.0256641 | 0.167347  |
| Akr1c19_j1       | 0.151288   | 0.157912 | 0.0618162    | 0.950484  | 0.985701  |
| Klf6             | 14.2689    | 24.1616  | 0.759846     | 2.22E-16  | 5.36E-14  |
| Pitrm1           | 0.951488   | 0.915922 | 0            | 1         | 1         |
| Larp4b           | 13.3024    | 12.2328  | -0.120936    | 0.197155  | 0.53985   |
| XLOC_008072      | 0.247009   | 0.125148 | -0.980923    | 0.553726  | 0.817269  |
| Dip2c            | 3.58978    | 2.48483  | -0.530749    | 0.0001095 | 0.0023259 |
| Ero1lb           | 3.20084    | 2.15812  | 0            | 1         | 1         |
| Nid1_j1          | 4.87278    | 6.40124  | 0            | 1         | 1         |
| Lyst_j3          | 3.0752     | 3.57006  | 0            | 1         | 1         |
| Gng4_j1          | 1.3592     | 2.17543  | 0            | 1         | 1         |
| Gng4             | 1.62311    | 2.16543  | 0            | 1         | 1         |
| Gng4_j2          | 1.9927     | 1.99346  | 0            | 1         | 1         |
| B3galnt2         | 0.357383   | 0.3537   | 0            | 1         | 1         |
| Arid4b           | 1.84522    | 1.91687  | 0            | 1         | 1         |
| Arid4b           | 0.312127   | 5.32E-05 | 0            | 1         | 1         |
| Arid4b_j2        | 0.511026   | 0.438567 | 0            | 1         | 1         |
| Psm2             | 69.2236    | 71.145   | 0.0394974    | 0.692757  | 0.8862    |
| AW209491         | 5.12631    | 4.61869  | 0            | 1         | 1         |
| Vps41_j1         | 5.77745    | 2.76392  | 0            | 1         | 1         |
| Vps41_j4         | 21.9424    | 23.0011  | 0            | 1         | 1         |



|                  |           |             |               |           |           |
|------------------|-----------|-------------|---------------|-----------|-----------|
| Amph             | 11.4733   | 9.12848     | -0.329831     | 0.0003672 | 0.0063068 |
| Sfrp4            | 1.831     | 2.00132     | 0.128321      | 0.548668  | 0.814279  |
| Sfrp4_j2         | 0.0964059 | 0           | -1.79769e+308 | 0.0597225 | 1         |
| Elmo1_j1         | 2.43739   | 1.76601     | -0.464843     | 0.0024573 | 0.0294354 |
| Elmo1_j6         | 0.183305  | 0.0632855   | -1.5343       | 0.0404877 | 0.225632  |
| Elmo1            | 19.1177   | 15.2813     | -0.323139     | 0.0009972 | 0.0142838 |
| Aoah_j2          | 0.124225  | 0.0144044   | -3.10836      | 0.169706  | 1         |
| Trim27_j3        | 3.39621   | 3.32715     | -0.0296369    | 0.871878  | 0.959436  |
| Trim27           | 3.03453   | 3.83185     | 0.336569      | 0.0661838 | 0.307208  |
| Zscan12          | 0.0975335 | 0.35011     | 1.84384       | 0.0002274 | 0.0042713 |
| Zscan12_j1       | 0.263503  | 0.103251    | -1.35167      | 0.0194711 | 0.138371  |
| Zkscan4          | 0.942037  | 1.04521     | 0.149939      | 0.497634  | 0.783786  |
| Gm11274          | 0.264773  | 0.438735    | 0.728597      | 0.100705  | 0.392984  |
| Hist1h2bc        | 0.0653477 | 0.0396924   | 0             | 1         | 1         |
| BC005537_j3      | 0.613798  | 0.440783    | -0.477697     | 0.218807  | 0.565038  |
| BC005537_j2      | 0.326465  | 0.371214    | 0.185322      | 0.680703  | 0.879921  |
| BC005537_j1      | 1.21276   | 2.45258     | 1.01601       | 0.0001158 | 0.0024341 |
| Tdp2             | 6.74159   | 5.80772     | -0.215117     | 0.113197  | 0.418792  |
| D130043K22Rik_j1 | 1.65679   | 0.961945    | 0             | 1         | 1         |
| Dcdc2a_j1        | 0.378701  | 0.24038     | -0.655742     | 0.201919  | 0.545319  |
| Gm11361          | 97.8897   | 116.094     | 0.246065      | 0.0137521 | 0.108068  |
| AK020728_j2      | 1.24044   | 1.40095     | 0             | 1         | 1         |
| Mboat1_j1        | 0.501892  | 0.455957    | -0.138477     | 0.798096  | 0.932954  |
| Mboat1           | 0.359685  | 0.000469856 | -9.5803       | 0.578704  | 0.830487  |
| Mboat1_j3        | 0.478097  | 0.359506    | -0.411288     | 0.437836  | 0.747849  |
| Mboat1_j4        | 0.919635  | 0.84857     | -0.116028     | 0.732908  | 0.905765  |
| Agtr1a           | 6.27201   | 4.54703     | -0.464003     | 0.0017265 | 0.0222194 |
| Dusp22           | 15.7795   | 15.6777     | -0.00933224   | 0.926125  | 0.977075  |
| Dusp22_j1        | 0.547175  | 0.902736    | 0.722302      | 0.0421682 | 0.23207   |
| Foxf2            | 0.217012  | 0.308056    | 0.505414      | 0.210902  | 0.555618  |
| XLOC_008128      | 0.281562  | 0.245217    | -0.199394     | 1         | 1         |
| Wrnip1           | 6.23211   | 7.70417     | 0.305919      | 0.0090152 | 0.0792162 |
| Serpinb9         | 0         | 0.132558    | 1.79769e+308  | 0.005089  | 1         |
| Serpinb1b        | 12.8261   | 17.0232     | 0.408418      | 0.0001972 | 0.0037945 |
| Psmg4            | 3.3375    | 3.73114     | 0.160847      | 0.626397  | 0.854124  |
| Psmg4            | 6.60162   | 7.46808     | 0.177917      | 0.427991  | 0.741954  |
| Prpf4b_j3        | 6.36557   | 5.60703     | 0             | 1         | 1         |
| Prpf4b_j2        | 1.75689   | 1.2133      | 0             | 1         | 1         |
| Prpf4b_j1        | 0.228712  | 0.266213    | 0             | 1         | 1         |
| Cdyl             | 2.53221   | 2.30726     | -0.134219     | 0.457279  | 0.760373  |
| Fars2_j1         | 0.571367  | 0.474104    | -0.269214     | 0.294859  | 0.641466  |
| XLOC_008139      | 0.093417  | 0.0178541   | -2.38743      | 0.243333  | 1         |
| Ly86_j1          | 158.858   | 162.286     | 0.0308048     | 0.725448  | 0.902457  |
| Rreb1_j1         | 0.0618585 | 0.16777     | 1.43944       | 0.0035656 | 0.0395332 |
| Rreb1_j4         | 0.106544  | 0           | -1.79769e+308 | 8.63E-07  | 1         |
| Rreb1_j7         | 0.428655  | 0.419171    | -0.0322768    | 0.924106  | 0.976334  |
| Riok1            | 2.02913   | 2.05312     | 0.0169574     | 0.911546  | 0.972265  |

|               |          |           |               |           |           |
|---------------|----------|-----------|---------------|-----------|-----------|
| Snrnp48       | 7.50936  | 8.46499   | 0.172818      | 0.203229  | 0.547195  |
| Snrnp48       | 1.50985  | 1.23032   | -0.295374     | 0.441435  | 0.750188  |
| Bmp6          | 0.808998 | 1.03567   | 0             | 1         | 1         |
| Gm6245        | 8.98115  | 7.68224   | -0.225374     | 0.189719  | 0.531612  |
| Gcnt2_j1      | 9.7552   | 10.3718   | 0             | 1         | 1         |
| Gcnt2         | 18.3942  | 18.5232   | 0             | 1         | 1         |
| Pak1ip1_j2    | 11.2479  | 10.6808   | 0             | 1         | 1         |
| BC024659      | 2.3614   | 1.87064   | -0.336108     | 0.0514995 | 0.263163  |
| BC024659_j1   | 35.5165  | 31.4005   | -0.177698     | 0.0447084 | 0.241506  |
| Tmem170b      | 3.06908  | 3.10345   | 0.0160669     | 0.892344  | 0.965882  |
| Gm10790_j1    | 0.17065  | 0.0515192 | -1.72785      | 0.130881  | 0.450454  |
| Gm10790_j2    | 0.120929 | 0         | -1.79769e+308 | 0.0017067 | 1         |
| Hivep1        | 3.56824  | 3.20615   | -0.154373     | 0.182831  | 0.523288  |
| Hivep1_j6     | 2.25498  | 1.59242   | -0.501892     | 0.0423561 | 0.232718  |
| Phactr1       | 10.6577  | 9.4877    | 0             | 1         | 1         |
| Phactr1_j2    | 8.67752  | 8.75344   | 0             | 1         | 1         |
| Nol7          | 0.905232 | 0.797922  | 0             | 1         | 1         |
| Rnf182        | 1.19049  | 0.478209  | -1.31584      | 4.29E-05  | 0.001046  |
| Rnf182_j3     | 0.43013  | 0         | -1.79769e+308 | 1.11E-10  | 1.12E-08  |
| AK038993_j3   | 0.16671  | 0.0641751 | -1.37726      | 0.338975  | 0.679218  |
| Cd83          | 0.187939 | 0.127812  | -0.556242     | 0.47691   | 0.772482  |
| Jarid2        | 1.44168  | 1.35245   | -0.0921688    | 0.613152  | 0.847467  |
| Jarid2_j6     | 1.59487  | 0.806226  | -0.984184     | 0.0048979 | 0.0499208 |
| Mylip         | 2.57302  | 2.61192   | 0.0216507     | 0.892041  | 0.965725  |
| Gmpr_j1       | 1.19824  | 1.07602   | -0.155217     | 0.459913  | 0.761686  |
| 5033430l15Rik | 0.545381 | 1.06982   | 0.972033      | 0.0729207 | 0.325012  |
| XLOC_008173   | 0.167439 | 0.142232  | -0.235391     | 0.769305  | 0.921491  |
| Cap2          | 2.79082  | 2.61049   | -0.0963681    | 0.514308  | 0.793368  |
| C78339        | 5.5055   | 5.03977   | 0             | 1         | 1         |
| Kdm1b         | 0.499143 | 0.424079  | -0.235122     | 0.361065  | 0.695733  |
| Kdm1b_j3      | 0.36701  | 0.226148  | -0.698554     | 0.257103  | 0.605894  |
| Rnf144b       | 0.129526 | 0.0343491 | 0             | 1         | 1         |
| Rnf144b_j1    | 0.73805  | 0.313709  | 0             | 1         | 1         |
| Rnf144b       | 0.275237 | 0.63514   | 0             | 1         | 1         |
| Rnf144b_j4    | 0.411369 | 0.0845097 | 0             | 1         | 1         |
| Id4           | 15.3115  | 11.2824   | -0.440535     | 9.80E-06  | 0.0003051 |
| A830005F24Rik | 0.837083 | 0.971065  | 0.214197      | 0.383806  | 0.71322   |
| C030044B11Rik | 2.25945  | 2.6338    | 0.221174      | 0.335539  | 0.676258  |
| Ninj1         | 4.04439  | 4.03255   | -0.0042307    | 0.982702  | 0.994705  |
| Bicd2         | 8.80724  | 8.99553   | 0.0305176     | 0.748898  | 0.912691  |
| Tes3-ps       | 3.61751  | 3.03431   | -0.253628     | 0.125838  | 0.441688  |
| Ecm2          | 0.235593 | 0.358313  | 0.604927      | 0.0733485 | 0.326292  |
| Ogn           | 6.6895   | 9.64325   | 0.527622      | 9.24E-06  | 0.0002901 |
| Nol8_j2       | 2.44557  | 2.10506   | 0             | 1         | 1         |
| Iars          | 16.6998  | 16.0311   | -0.0589588    | 0.529632  | 0.802576  |
| Fbxw17_j1     | 2.65088  | 2.70279   | 0             | 1         | 1         |
| Fbxw17        | 9.11011  | 8.46553   | 0             | 1         | 1         |

|               |           |                 |            |           |           |
|---------------|-----------|-----------------|------------|-----------|-----------|
| Spin1         | 23.3428   | 21.6032         | 0          | 1         | 1         |
| Spin1_j2      | 7.33014   | 5.41276         | 0          | 1         | 1         |
| Spin1_j3      | 0.832467  | 0.689876        | 0          | 1         | 1         |
| Nxnl2_j1      | 0.316911  | 0.169986        | -0.898662  | 0.265596  | 0.614482  |
| Nxnl2         | 1.03809   | 0.4502          | -1.20529   | 0.0218495 | 0.14979   |
| Secisbp2      | 1.29834   | 1.38691         | 0          | 1         | 1         |
| Gadd45g       | 14.9498   | 28.9386         | 0.952866   | 4.44E-16  | 1.02E-13  |
| Sfxn1         | 7.60275   | 8.25829         | 0          | 1         | 1         |
| Sfxn1_j4      | 2.05105   | 1.50261         | 0          | 1         | 1         |
| Cplx2_j1      | 3.77967   | 3.12218         | 0          | 1         | 1         |
| Cplx2         | 15.2132   | 10.7556         | 0          | 1         | 1         |
| Cplx2_j2      | 9.18711   | 6.31785         | 0          | 1         | 1         |
| Arl10         | 7.73598   | 8.73667         | 0.175498   | 0.14551   | 0.473431  |
| Higd2a        | 30.153    | 34.4708         | 0.193076   | 0.0822833 | 0.34951   |
| Faf2          | 14.0714   | 14.2966         | 0.0229084  | 0.802337  | 0.934274  |
| Tspan17_j3    | 2.43465   | 2.65194         | 0.123338   | 0.661664  | 0.871766  |
| Tspan17_j4    | 1.09755   | 0.943499        | -0.218189  | 0.594707  | 0.838618  |
| Tspan17       | 72.6889   | 96.3998         | 0.407295   | 1.73E-05  | 0.0004934 |
| Tspan17_j6    | 41.1872   | 53.7994         | 0.385394   | 0.0005022 | 0.0081728 |
| Unc5a_j1      | 1.64735   | 1.26211         | 0          | 1         | 1         |
| Unc5a         | 1.64153   | 0.854905        | 0          | 1         | 1         |
| Zfp346        | 1.92283   | 0.973189        | 0          | 1         | 1         |
| Zfp346_j4     | 1.45886   | 1.56846         | 0          | 1         | 1         |
| Nsd1_j3       | 0.0545381 | 0.0302617       | -0.84977   | 0.176029  | 1         |
| Grk6          | 24.4743   | 31.176          | 0.349168   | 0.0001333 | 0.0027261 |
| Tmed9         | 38.7488   | 40.6567         | 0.069341   | 0.489413  | 0.779561  |
| Tmed9_j3      | 0.778991  | 0 -1.79769e+308 |            | 1.27E-06  | 5.06E-05  |
| B4galt7       | 3.93359   | 4.6235          | 0          | 1         | 1         |
| CamI          | 8.77056   | 10.5916         | 0.272173   | 0.0597825 | 0.287727  |
| Ddx46         | 7.40738   | 7.22133         | -0.0366993 | 0.726721  | 0.90322   |
| Ddx46_j1      | 1.04276   | 1.81355         | 0.798409   | 0.0004279 | 0.0071524 |
| B230219D22Rik | 25.8143   | 28.2244         | 0.128773   | 0.145823  | 0.473782  |
| Txndc15       | 15.4594   | 15.2439         | -0.0202543 | 0.843981  | 0.950679  |
| Pcbd2_j1      | 2.19685   | 2.11333         | -0.0559167 | 0.860529  | 0.955855  |
| Pcbd2         | 8.25545   | 9.3821          | 0.184563   | 0.303388  | 0.649038  |
| Catsper3_j2   | 0.167673  | 0.101069        | -0.730315  | 0.546818  | 0.81317   |
| Fbxl21        | 0.99329   | 0.53856         | -0.883107  | 0.090421  | 0.369279  |
| Fbxl21        | 0.691534  | 0.929481        | 0.426626   | 0.0469923 | 0.24858   |
| Fbxl21_j1     | 0.354757  | 0.303834        | -0.223549  | 0.561748  | 0.821809  |
| Tgfb1         | 5.68151   | 9.45098         | 0          | 1         | 1         |
| Smad5         | 1.15752   | 1.17808         | 0          | 1         | 1         |
| Smad5         | 0.62968   | 0.570057        | 0          | 1         | 1         |
| Smad5         | 0.273887  | 9.61E-05        | 0          | 1         | 1         |
| 5133401N09Rik | 4.07685   | 3.95487         | -0.0438237 | 0.740793  | 0.909129  |
| Ntrk2_j3      | 8.25345   | 6.17004         | 0          | 1         | 1         |
| Ntrk2_j4      | 4.21507   | 4.91862         | 0          | 1         | 1         |
| Naa35_j1      | 10.0388   | 10.2569         | 0.0310052  | 0.820837  | 0.94203   |

|                  |          |                 |            |           |           |
|------------------|----------|-----------------|------------|-----------|-----------|
| Naa35            | 1.8594   | 1.92958         | 0.0534463  | 0.762765  | 0.918318  |
| Dapk1_j1         | 0.213495 | 0.186756        | 0          | 1         | 1         |
| XLOC_008247      | 0.256875 | 0.268935        | 0.0661862  | 0.945603  | 0.983787  |
| XLOC_008251      | 0.864372 | 0.807027        | 0          | 1         | 1         |
| apo              | 4.96617  | 7.29721         | 0          | 1         | 1         |
| 0610007P08Rik    | 0.48558  | 0.374974        | 0          | 1         | 1         |
| Habp4            | 47.9522  | 46.5306         | -0.0434182 | 0.620805  | 0.851388  |
| Cdk20            | 0.266697 | 0.248162        | -0.103922  | 0.802902  | 0.934497  |
| Zfp369_j4        | 0.222471 | 0 -1.79769e+308 |            | 1.83E-12  | 2.51E-10  |
| Ptdss1           | 7.81454  | 8.46511         | 0.115368   | 0.260811  | 0.609635  |
| Zfp759           | 0.117287 | 0.0270613       | -2.11573   | 0.0905858 | 1         |
| Zfp493           | 0.409541 | 0.362601        | -0.175625  | 0.54612   | 0.812874  |
| Zfp273           | 0.563892 | 0.296638        | -0.926717  | 0.0376837 | 0.215476  |
| Zfp273           | 0.796154 | 0.285951        | -1.47728   | 0.0009046 | 0.0132118 |
| BC100427_j2      | 0.66129  | 0.19715         | -1.74599   | 0.0241214 | 0.160269  |
| Fastkd3          | 0.438082 | 0.449647        | 0.0375925  | 0.917631  | 0.974336  |
| Fastkd3          | 1.87916  | 1.99254         | 0.0845237  | 0.798559  | 0.933125  |
| Fastkd3          | 2.36016  | 2.12485         | -0.151523  | 0.473453  | 0.770096  |
| 1700001L19Rik    | 0.486749 | 0.575056        | 0.240522   | 0.506274  | 0.788746  |
| 1700001L19Rik_j3 | 1.03679  | 0.378169        | -1.45502   | 0.107293  | 0.407129  |
| Nsun2            | 20.4963  | 21.3041         | 0          | 1         | 1         |
| Lpcat1_j1        | 1.5675   | 0.955254        | 0          | 1         | 1         |
| Lpcat1           | 5.42959  | 6.53084         | 0          | 1         | 1         |
| Clptm1l          | 23.5347  | 24.781          | 0.0744446  | 0.469195  | 0.767425  |
| Clptm1l_j1       | 7.11575  | 7.70657         | 0.115073   | 0.563063  | 0.822343  |
| Slc12a7_j1       | 1.57363  | 1.04013         | 0          | 1         | 1         |
| Slc12a7          | 2.82098  | 2.71313         | 0          | 1         | 1         |
| Brd9             | 2.92181  | 3.58289         | 0          | 1         | 1         |
| Brd9             | 11.192   | 11.7907         | 0          | 1         | 1         |
| Tppp             | 0.755701 | 0.376045        | 0          | 1         | 1         |
| Tppp_j2          | 2.0414   | 1.29932         | 0          | 1         | 1         |
| Tppp_j3          | 0.453745 | 1.02581         | 0          | 1         | 1         |
| Slc9a3_j5        | 0.296176 | 0.291633        | -0.0222983 | 0.955755  | 0.987317  |
| Ccdc127          | 7.03455  | 6.49646         | 0          | 1         | 1         |
| Erap1            | 2.6432   | 2.25587         | 0          | 1         | 1         |
| Pcsk1            | 16.8669  | 15.9801         | -0.077921  | 0.403974  | 0.72656   |
| Ell2             | 4.23474  | 4.78011         | 0          | 1         | 1         |
| Glrx             | 23.7517  | 24.0133         | 0.0157983  | 0.883548  | 0.963043  |
| Ttc37_j4         | 1.84034  | 1.3678          | 0          | 1         | 1         |
| XLOC_008300      | 0.153867 | 0.1147          | -0.423812  | 0.722126  | 0.900975  |
| Mctp1_j4         | 0.814352 | 0.560933        | -0.537825  | 0.0805683 | 0.345417  |
| Mctp1_j5         | 5.92467  | 4.17414         | -0.505256  | 2.25E-05  | 0.0006107 |
| 2210408I21Rik_j1 | 0.103545 | 0               | 0          | 1         | 1         |
| Fam172a_j2       | 1.16076  | 1.88191         | 0          | 1         | 1         |
| Fam172a          | 2.35785  | 2.09313         | 0          | 1         | 1         |
| Fam172a          | 2.34861  | 2.24667         | 0          | 1         | 1         |
| Fam172a_j3       | 0.29779  | 0               | 0          | 1         | 1         |

|                  |           |                 |            |           |           |
|------------------|-----------|-----------------|------------|-----------|-----------|
| AK044036_j1      | 0.492918  | 0.421288        | 0          | 1         | 1         |
| AK044036_j2      | 0.599403  | 0.609539        | 0          | 1         | 1         |
| Arrdc3           | 3.40282   | 2.68782         | 0          | 1         | 1         |
| Arrdc3_j1        | 1.72378   | 3.00117         | 0          | 1         | 1         |
| 9330111N05Rik_j1 | 0.121003  | 0 -1.79769e+308 | 0.0127361  |           | 1         |
| Mblac2           | 3.00055   | 2.80694         | 0          | 1         | 1         |
| Cetn3            | 2.83213   | 3.21185         | 0.181517   | 0.226769  | 0.573866  |
| Cetn3_j4         | 28.1842   | 33.1048         | 0.232156   | 0.0858729 | 0.357711  |
| Mef2c_j3         | 0.883653  | 0.737207        | 0          | 1         | 1         |
| C130071C03Rik_j1 | 0.0730603 | 0 -1.79769e+308 | 0.0074412  |           | 1         |
| C130071C03Rik_j3 | 0.143281  | 0 -1.79769e+308 | 0.0002517  | 0.0046481 |           |
| C130071C03Rik_j4 | 0.0571726 | 0.293732        | 2.36111    | 0.0017857 | 0.0228208 |
| 2810049E08Rik_j1 | 0.066182  | 0.039602        | -0.740864  | 0.730381  | 1         |
| 2810049E08Rik_j2 | 0.320498  | 0.227037        | -0.497386  | 0.368849  | 0.702119  |
| Tmem161b         | 0.785629  | 0.375818        | 0          | 1         | 1         |
| Ccnh             | 0.693395  | 0.603151        | 0          | 1         | 1         |
| Edil3            | 41.3105   | 33.7717         | 0          | 1         | 1         |
| Edil3_j4         | 0.602988  | 0               | 0          | 1         | 1         |
| Hapln1_j2        | 5.79662   | 2.87742         | -1.01044   | 2.89E-15  | 5.91E-13  |
| Tmem167          | 5.81779   | 5.38284         | -0.112104  | 0.244401  | 0.592004  |
| Dhfr             | 0.960582  | 0.830095        | 0          | 1         | 1         |
| Ankrd34b         | 0.392602  | 0.215638        | -0.864453  | 0.032894  | 0.197493  |
| Ankrd34b         | 0.169998  | 0.0328569       | -2.37125   | 0.0308483 | 0.189256  |
| Ankrd34b_j2      | 0.278026  | 0.0209432       | -3.73067   | 0.0074501 | 0.0690312 |
| Serinc5          | 9.05007   | 8.84918         | 0          | 1         | 1         |
| Serinc5_j3       | 5.58965   | 5.04            | 0          | 1         | 1         |
| Mtx3             | 4.83223   | 3.29447         | 0          | 1         | 1         |
| Homer1           | 2.34333   | 1.92906         | -0.280667  | 0.0707462 | 0.319729  |
| Arsb             | 2.60147   | 2.46391         | -0.0783752 | 0.644979  | 0.863026  |
| Lhfp12_j2        | 0.987854  | 0.518223        | 0          | 1         | 1         |
| Ap3b1            | 0.926138  | 0.984903        | 0.0887545  | 0.703676  | 0.891515  |
| Tbca_j4          | 0.56812   | 0.274638        | 0          | 1         | 1         |
| Zbed3            | 0.835951  | 0.917204        | 0.133823   | 0.670738  | 0.875476  |
| F2rl2            | 5.18479   | 4.76222         | -0.122651  | 0.265523  | 0.614392  |
| Poc5             | 6.42283   | 5.65567         | -0.183511  | 0.0928444 | 0.374785  |
| Col4a3bp         | 12.9289   | 10.3415         | 0          | 1         | 1         |
| Gcnt4            | 0.152081  | 0.47276         | 1.63627    | 2.71E-05  | 0.0007087 |
| Gcnt4_j3         | 0.110392  | 0.0438768       | -1.3311    | 0.130012  | 1         |
| Fam169a          | 3.4153    | 2.62853         | 0          | 1         | 1         |
| Fam169a_j1       | 1.84839   | 1.77673         | 0          | 1         | 1         |
| Gfm2_j3          | 0.0367203 | 0.0501012       | 0          | 1         | 1         |
| Enc1             | 2.41773   | 2.75281         | 0.187253   | 0.173094  | 0.510747  |
| XLOC_008345      | 0.0979549 | 0.0405019       | -1.27413   | 0.56395   | 1         |
| Ankra2           | 1.84061   | 1.57028         | -0.229159  | 0.480465  | 0.774251  |
| Ankra2           | 7.81967   | 9.35731         | 0.258986   | 0.0592975 | 0.286271  |
| Gm9828           | 0.16448   | 0.172813        | 0.0712966  | 0.918991  | 0.974676  |
| Gm9828_j3        | 0.306287  | 0.132921        | -1.20432   | 0.178346  | 0.517853  |

|                   |           |                 |            |           |           |
|-------------------|-----------|-----------------|------------|-----------|-----------|
| XLOC_008350       | 0.147744  | 0.0493627       | -1.58161   | 0.0644973 | 0.301823  |
| Mrps27            | 13.7445   | 14.6271         | 0          | 1         | 1         |
| Serf1             | 24.5483   | 25.3804         | 0.0480923  | 0.718304  | 0.898622  |
| Smn1              | 5.70338   | 5.84314         | 0.0349284  | 0.846664  | 0.951509  |
| Taf9              | 3.73527   | 2.92967         | 0          | 1         | 1         |
| Taf9              | 7.02704   | 7.55758         | 0          | 1         | 1         |
| Taf9              | 3.70611   | 2.81836         | 0          | 1         | 1         |
| Taf9_j3           | 2.86696   | 3.11123         | 0          | 1         | 1         |
| XLOC_008359       | 0.0997034 | 0.055343        | -0.849242  | 0.402298  | 1         |
| Sgtb              | 1.62742   | 1.57838         | 0          | 1         | 1         |
| Trim23_j1         | 9.14436   | 8.18181         | 0          | 1         | 1         |
| Cenpk_j1          | 0.381302  | 0.410075        | 0          | 1         | 1         |
| Adamts6_j2        | 0.16437   | 0.0462558       | -1.82924   | 0.117818  | 0.427133  |
| Srek1ip1          | 3.20084   | 2.99731         | -0.0947826 | 0.564369  | 0.823289  |
| Htr1a             | 0.595201  | 0.379989        | -0.64742   | 0.0396112 | 0.2224    |
| Dimt1_j1          | 0.578842  | 0.522008        | 0          | 1         | 1         |
| Dimt1_j6          | 0.187937  | 0.0503492       | 0          | 1         | 1         |
| 3830408C21Rik_j7  | 0.0986957 | 0 -1.79769e+308 | 0.0236485  |           | 1         |
| 3830408C21Rik_j9  | 0.0963426 | 0.035169        | -1.45387   | 0.2276    | 1         |
| 3830408C21Rik_j11 | 0.147747  | 0.0191481       | -2.94786   | 0.194425  | 0.536757  |
| 2810008M24Rik     | 10.745    | 12.4158         | 0          | 1         | 1         |
| Elovl7_j5         | 6.81168   | 10.502          | 0          | 1         | 1         |
| Pde4d_j1          | 1.47501   | 0.989328        | 0          | 1         | 1         |
| Pde4d             | 1.30035   | 1.00749         | 0          | 1         | 1         |
| Pde4d             | 2.00163   | 1.17278         | 0          | 1         | 1         |
| Plk2              | 9.61612   | 8.83107         | -0.122867  | 0.264542  | 0.613354  |
| Mier3             | 1.58655   | 1.7783          | 0          | 1         | 1         |
| Ankrd55_j1        | 1.60986   | 1.24365         | -0.37235   | 0.179481  | 0.519116  |
| Ankrd55           | 4.27182   | 3.35019         | -0.350608  | 0.0335391 | 0.200138  |
| Il6st             | 4.76054   | 4.76499         | 0          | 1         | 1         |
| Ppap2a            | 23.0549   | 18.0782         | 0          | 1         | 1         |
| Ppap2a            | 5.45303   | 5.04324         | 0          | 1         | 1         |
| Ppap2a_j2         | 15.3438   | 12.0676         | 0          | 1         | 1         |
| Dhx29             | 7.10115   | 6.95418         | 0          | 1         | 1         |
| Ccno              | 0.163001  | 0.265087        | 0.701591   | 0.258452  | 0.60721   |
| Esm1              | 0.392314  | 0.189179        | -1.05226   | 0.0114092 | 0.0945204 |
| BC067074_j2       | 0.788664  | 0.754924        | -0.0630805 | 0.716625  | 0.897704  |
| Arl15             | 0.379059  | 0.283059        | 0          | 1         | 1         |
| Mocs2_j1          | 0.206657  | 0.367085        | 0.828872   | 0.390194  | 0.717194  |
| Mocs2_j3          | 0.476198  | 0.296704        | -0.682537  | 0.468707  | 0.767193  |
| Mocs2             | 3.22784   | 3.87071         | 0.262029   | 0.425276  | 0.740539  |
| Emb_j1            | 51.4828   | 47.5191         | -0.115584  | 0.266585  | 0.615602  |
| Emb_j2            | 27.5558   | 26.2705         | -0.0689128 | 0.558013  | 0.819821  |
| Emb               | 36.1997   | 31.992          | -0.178264  | 0.0386885 | 0.219137  |
| Hcn1              | 1.72652   | 1.24868         | -0.467471  | 0.001057  | 0.0149125 |
| Paip1_j1          | 18.7996   | 17.3962         | -0.111927  | 0.297637  | 0.64423   |
| Paip1_j3          | 4.51366   | 5.77402         | 0.355277   | 0.102206  | 0.396215  |

|                  |           |                 |            |           |           |
|------------------|-----------|-----------------|------------|-----------|-----------|
| 4833420G17Rik    | 3.37203   | 3.13542         | 0          | 1         | 1         |
| 4833420G17Rik_j2 | 0.0794222 | 0.109131        | 0          | 1         | 1         |
| Gm7120_j1        | 0.688787  | 0.760736        | 0.143338   | 0.679376  | 0.879493  |
| Gm7120           | 9.92732   | 7.89675         | -0.330146  | 0.0421519 | 0.23204   |
| XLOC_008407      | 1.82987   | 1.62742         | -0.169152  | 0.607809  | 0.845351  |
| Net1_j1          | 2.74139   | 3.61676         | 0.39979    | 0.013156  | 0.104906  |
| Akr1e1           | 2.34067   | 2.21497         | -0.0796334 | 0.612743  | 0.847359  |
| Pfkip            | 34.2335   | 29.9729         | 0          | 1         | 1         |
| Wdr37            | 4.5878    | 4.84586         | 0          | 1         | 1         |
| Wdr37            | 3.39073   | 3.04048         | 0          | 1         | 1         |
| Gtpbp4           | 9.15964   | 7.98829         | -0.197404  | 0.118696  | 0.428709  |
| Zmynd11_j10      | 1.85273   | 0.467501        | 0          | 1         | 1         |
| Chrm3            | 0.21776   | 0.458647        | 1.07464    | 0.0038962 | 0.0421181 |
| Ryr2_j2          | 0.901418  | 0.485586        | -0.89247   | 0.0033211 | 0.0373318 |
| Ryr2_j7          | 0.34711   | 0 -1.79769e+308 |            | 2.85E-29  | 9.40E-27  |
| Mtr_j3           | 0.0749835 | 0.0313169       | -1.25963   | 0.148115  | 1         |
| Mtr              | 1.98267   | 1.83801         | -0.1093    | 0.445297  | 0.752905  |
| Actn2_j7         | 0.166319  | 0.586193        | 1.81742    | 0.0003502 | 0.0060582 |
| Lgals8           | 23.8187   | 25.3451         | 0          | 1         | 1         |
| Lgals8           | 16.893    | 15.3858         | 0          | 1         | 1         |
| Gpr137b-ps       | 3.71007   | 3.57776         | -0.0523896 | 0.661425  | 0.871676  |
| Gpr137b-ps_j1    | 0.994452  | 1.35135         | 0.442428   | 0.0181684 | 0.131811  |
| Gpr137b          | 2.45052   | 1.77872         | 0          | 1         | 1         |
| Hecw1_j4         | 1.05725   | 0.475108        | 0          | 1         | 1         |
| Hecw1            | 2.4042    | 1.63728         | 0          | 1         | 1         |
| Mrpl32           | 5.68871   | 5.77852         | 0.0225982  | 0.862413  | 0.956422  |
| Cdk13            | 0.320966  | 0.328781        | 0.0347039  | 0.900375  | 0.968327  |
| Rala             | 17.4882   | 17.2803         | 0          | 1         | 1         |
| Stard3nl         | 66.3668   | 68.6562         | 0.048929   | 0.594935  | 0.838618  |
| Epdr1            | 72.7436   | 66.5289         | 0          | 1         | 1         |
| Zkscan3          | 2.15053   | 2.34818         | 0          | 1         | 1         |
| Zkscan3_j1       | 0.307447  | 0.261813        | 0          | 1         | 1         |
| Pgbd1_j1         | 0.317074  | 0.310339        | -0.0309735 | 0.949599  | 0.985371  |
| Nkapl            | 0.185221  | 0.178862        | -0.0503964 | 0.916467  | 0.973929  |
| Zfp389           | 0.508395  | 0.413972        | -0.296418  | 0.444264  | 0.752066  |
| Zfp192_j1        | 0.25647   | 6.53E-05        | 0          | 1         | 1         |
| Zfp192           | 1.0839    | 1.03634         | 0          | 1         | 1         |
| Zfp322a          | 0.829843  | 1.00771         | 0          | 1         | 1         |
| Zfp322a          | 3.02653   | 2.60884         | 0          | 1         | 1         |
| Abt1             | 8.17561   | 8.32144         | 0.0255067  | 0.858188  | 0.954952  |
| Hist1h2be        | 1.62051   | 1.04361         | 0          | 1         | 1         |
| Hfe              | 1.47529   | 2.14668         | 0.541114   | 0.0022233 | 0.0270913 |
| Hfe_j1           | 0.551612  | 0.445255        | -0.30902   | 0.411668  | 0.730802  |
| Scgn             | 0.598359  | 0.915652        | 0.613789   | 0.0736352 | 0.327003  |
| Lrrc16a_j1       | 0.142467  | 0.0397302       | -1.84232   | 0.0321191 | 0.194416  |
| Lrrc16a          | 0.885529  | 0.876127        | -0.0153996 | 0.947008  | 0.984332  |
| Gmnn             | 2.95835   | 3.40792         | 0.204097   | 0.339256  | 0.679562  |

|               |           |                 |            |           |          |
|---------------|-----------|-----------------|------------|-----------|----------|
| Mrs2          | 11.4723   | 10.7447         | 0          | 1         | 1        |
| Nrsn1_j1      | 0.952918  | 0               | 0          | 1         | 1        |
| Nrsn1         | 15.7035   | 11.8885         | 0          | 1         | 1        |
| XLOC_008472   | 0.101137  | 0 -1.79769e+308 |            | 2.63E-05  | 1        |
| XLOC_008472   | 0.231538  | 0.108998        | -1.08695   | 0.0226516 | 0.153603 |
| XLOC_008473   | 0.269857  | 0.0284627       | -3.24505   | 0.113749  | 0.419374 |
| BC025054_j6   | 0.195237  | 0.209827        | 0.103972   | 0.805186  | 0.935575 |
| BC025054_j5   | 0.240773  | 7.66E-05        | -11.6182   | 0.806593  | 0.936053 |
| Cdkal1_j3     | 0.542427  | 0.181508        | -1.5794    | 0.0188943 | 0.135576 |
| Cdkal1        | 2.23074   | 2.27243         | 0.0267163  | 0.886212  | 0.963821 |
| E2f3_j3       | 0.536181  | 0.476925        | 0          | 1         | 1        |
| E2f3_j1       | 2.46424   | 1.43181         | 0          | 1         | 1        |
| Uqcrfs1       | 91.2605   | 84.3146         | -0.114207  | 0.206313  | 0.550784 |
| Exoc2         | 5.65656   | 4.99307         | 0          | 1         | 1        |
| Serpinb1a_j3  | 0.674473  | 1.20154         | 0.833056   | 0.0399717 | 0.223713 |
| Serpinb6a_j1  | 0.642292  | 0.553321        | 0          | 1         | 1        |
| Serpinb6a_j4  | 91.4122   | 113.344         | 0          | 1         | 1        |
| Serpinb6a_j12 | 0.0552741 | 0               | 0          | 1         | 1        |
| Tubb2a        | 234.168   | 353.05          | 0          | 1         | 1        |
| Tubb2a_j4     | 1.33092   | 1.88116         | 0          | 1         | 1        |
| Tubb2b        | 207.567   | 355.045         | 0          | 1         | 1        |
| Slc22a23      | 9.21969   | 12.5107         | 0.440378   | 2.58E-06  | 9.50E-05 |
| Slc22a23_j1   | 2.06554   | 2.64523         | 0.356875   | 0.0174529 | 0.128101 |
| 1300014I06Rik | 1.42552   | 2.34546         | 0          | 1         | 1        |
| Peci_j4       | 3.93535   | 3.46747         | 0          | 1         | 1        |
| Peci          | 9.08546   | 8.72575         | 0          | 1         | 1        |
| Peci          | 4.14998   | 3.20667         | 0          | 1         | 1        |
| Rpp40         | 1.22515   | 1.27069         | 0.0526462  | 0.817809  | 0.940908 |
| Lym4          | 14.8649   | 13.0891         | -0.183537  | 0.201972  | 0.545319 |
| Nrn1          | 108.333   | 63.6629         | 0          | 1         | 1        |
| Nrn1_j2       | 154.484   | 134.427         | 0          | 1         | 1        |
| F13a1         | 1.15041   | 2.16817         | 0.914325   | 2.49E-08  | 1.60E-06 |
| Ssr1          | 17.6016   | 18.2918         | 0.0554855  | 0.665336  | 0.873092 |
| Ssr1_j1       | 6.08861   | 5.64252         | -0.109773  | 0.29336   | 0.640286 |
| Cage1_j1      | 0.493526  | 0.462061        | -0.0950436 | 0.69897   | 0.889085 |
| Txndc5        | 20.9106   | 20.3131         | 0          | 1         | 1        |
| Muted         | 11.586    | 10.7779         | -0.104305  | 0.391282  | 0.717886 |
| Eef1e1        | 26.4343   | 28.5674         | 0.111956   | 0.318963  | 0.662268 |
| Slc35b3_j1    | 1.49473   | 1.82114         | 0.284952   | 0.373985  | 0.706793 |
| Slc35b3       | 3.19527   | 2.86548         | -0.15716   | 0.47665   | 0.772215 |
| Slc35b3       | 0.212842  | 0.286768        | 0.430096   | 0.468154  | 0.766788 |
| Slc35b3_j6    | 1.88544   | 1.38301         | -0.447085  | 0.15394   | 0.486815 |
| Tcfap2a       | 0.178211  | 0.108959        | -0.709799  | 0.223718  | 0.570953 |
| AK043285_j3   | 15.2433   | 20.5225         | 0          | 1         | 1        |
| Elovl2_j1     | 0.655866  | 0.595884        | -0.138369  | 0.679412  | 0.879493 |
| Elovl2        | 2.81782   | 2.12776         | -0.405245  | 0.0160236 | 0.120477 |
| Nedd9_j1      | 0.668893  | 0.577718        | 0          | 1         | 1        |



|                  |           |          |               |           |           |
|------------------|-----------|----------|---------------|-----------|-----------|
| Nedd9            | 2.12323   | 1.66604  | 0             | 1         | 1         |
| 9530008L14Rik    | 0.28411   | 0.353601 | 0.315674      | 0.517877  | 0.796002  |
| 9530008L14Rik_j2 | 0.237546  | 0        | -1.79769e+308 | 0.0019827 | 0.0248178 |
| Tbc1d7           | 16.3655   | 15.0902  | -0.117045     | 0.362999  | 0.697185  |
| Tbc1d7           | 7.39324   | 6.07712  | -0.28282      | 0.140183  | 0.465682  |
| Gfod1            | 1.98729   | 1.45889  | 0             | 1         | 1         |
| Ranbp9_j1        | 6.38007   | 6.12028  | 0             | 1         | 1         |
| Ranbp9           | 14.5816   | 12.1886  | 0             | 1         | 1         |
| Ccdc90a          | 3.21444   | 3.02873  | -0.0858536    | 0.55347   | 0.817249  |
| Dtnbp1_j1        | 11.9189   | 19.1869  | 0.686869      | 8.53E-05  | 0.0018707 |
| Dtnbp1           | 19.2976   | 33.0354  | 0.77559       | 3.00E-12  | 3.98E-10  |
| Nup153_j1        | 2.07637   | 2.83467  | 0             | 1         | 1         |
| Nup153           | 4.42409   | 3.92728  | 0             | 1         | 1         |
| Kif13a_j11       | 0.434418  | 0.536547 | 0             | 1         | 1         |
| Kif13a_j9        | 0.89556   | 0.516485 | 0             | 1         | 1         |
| Nhlrc1           | 5.06752   | 5.27068  | 0.0567097     | 0.684193  | 0.881956  |
| Tpmt_j1          | 0.37004   | 0        | -1.79769e+308 | 3.66E-05  | 0.0009156 |
| Tpmt             | 0.599791  | 0.498949 | -0.265566     | 0.520034  | 0.797682  |
| Dek              | 1.01394   | 0.837067 | -0.27656      | 0.291535  | 0.638573  |
| Zfp169           | 0.264122  | 0.172472 | 0             | 1         | 1         |
| Zfp169_j1        | 0.811352  | 0.166357 | 0             | 1         | 1         |
| Ptpdc1_j3        | 2.651     | 3.20784  | 0             | 1         | 1         |
| Ptpdc1           | 4.09221   | 3.9011   | 0             | 1         | 1         |
| Phf2             | 3.83462   | 4.04836  | 0.0782566     | 0.52969   | 0.802619  |
| Fam120a_j2       | 0.0652053 | 0        | -1.79769e+308 | 0.0337486 | 1         |
| Fam120a          | 25.3784   | 23.2391  | -0.127049     | 0.157957  | 0.49215   |
| Wnk2_j2          | 3.85635   | 3.23099  | 0             | 1         | 1         |
| Wnk2_j3          | 5.4599    | 3.83848  | 0             | 1         | 1         |
| 1110007C09Rik_j4 | 27.4336   | 32.4681  | 0             | 1         | 1         |
| 1110007C09Rik    | 17.9683   | 29.6921  | 0             | 1         | 1         |
| 1110007C09Rik_j3 | 27.7894   | 28.6379  | 0             | 1         | 1         |
| Susd3_j2         | 0.23013   | 0.157216 | -0.549703     | 0.540852  | 0.809067  |
| Susd3            | 0.235302  | 0.266154 | 0.177747      | 0.79137   | 0.930476  |
| Shc3_j2          | 0.0939585 | 0        | 0             | 1         | 1         |
| Shc3_j1          | 0.875195  | 0.497206 | 0             | 1         | 1         |
| Shc3_j3          | 0.255764  | 0.359271 | 0             | 1         | 1         |
| Shc3             | 0.549087  | 0.407787 | 0             | 1         | 1         |
| Sema4d_j5        | 1.90881   | 2.78824  | 0             | 1         | 1         |
| Diras2           | 3.15191   | 3.24681  | 0             | 1         | 1         |
| Diras2_j1        | 7.29149   | 7.50516  | 0             | 1         | 1         |
| Auh              | 21.3123   | 18.3696  | 0             | 1         | 1         |
| Nfil3            | 3.08436   | 3.81373  | 0             | 1         | 1         |
| Ror2_j5          | 0.64661   | 1.49252  | 0             | 1         | 1         |
| Ror2_j6          | 0.337261  | 7.16E-05 | 0             | 1         | 1         |
| Ror2             | 0.41536   | 0.258444 | 0             | 1         | 1         |
| Sptlc1           | 9.66838   | 9.6032   | -0.00975788   | 0.936359  | 0.980443  |
| Thoc3            | 13.5059   | 13.2734  | -0.0250529    | 0.816466  | 0.940246  |

|                  |           |            |              |           |           |
|------------------|-----------|------------|--------------|-----------|-----------|
| XLOC_008555      | 4.26839   | 5.88338    | 0.462954     | 0.0582746 | 0.283399  |
| 4833439L19Rik_j5 | 0.198211  | 0.0265593  | 0            | 1         | 1         |
| 4833439L19Rik    | 1.78218   | 1.81958    | 0            | 1         | 1         |
| 4833439L19Rik_j6 | 0.405296  | 0.316131   | 0            | 1         | 1         |
| Nop16_j1         | 10.515    | 10.8441    | 0.0444659    | 0.733025  | 0.905803  |
| Cltb_j3          | 38.111    | 56.675     | 0            | 1         | 1         |
| Cltb             | 66.0859   | 80.2904    | 0            | 1         | 1         |
| Rnf44_j1         | 0.942372  | 0.779727   | 0            | 1         | 1         |
| Rnf44            | 3.65784   | 2.28789    | 0            | 1         | 1         |
| Rnf44_j4         | 0.129578  | 0.0729022  | 0            | 1         | 1         |
| Gprin1           | 0.870497  | 0.864975   | 0            | 1         | 1         |
| Gprin1           | 0.372456  | 0.672964   | 0            | 1         | 1         |
| Sncb_j1          | 0.627723  | 0.224083   | -1.48609     | 0.04319   | 0.235837  |
| Uimc1            | 0.690275  | 0.35633    | -0.953955    | 0.085259  | 0.356401  |
| Uimc1            | 3.10781   | 3.01473    | -0.0438668   | 0.801994  | 0.934238  |
| Rab24            | 5.73439   | 6.06951    | 0.081939     | 0.391168  | 0.717835  |
| Lman2            | 14.4786   | 14.1889    | -0.0291652   | 0.757292  | 0.916321  |
| Dbn1_j2          | 5.65408   | 7.54173    | 0            | 1         | 1         |
| Dbn1             | 17.9317   | 23.3445    | 0            | 1         | 1         |
| Pdlim7_j4        | 0         | 1.67122    | 1.79769e+308 | 4.07E-13  | 6.17E-11  |
| Pdlim7_j6        | 5.12301   | 4.74971    | -0.109154    | 0.437198  | 0.747542  |
| Pdlim7_j7        | 0.10651   | 2.34031    | 4.45764      | 0         | 0         |
| Pdlim7_j11       | 1.69284   | 1.50584    | -0.168878    | 0.736004  | 0.907116  |
| Fam193b_j7       | 5.22302   | 6.35448    | 0            | 1         | 1         |
| Fam193b          | 4.18684   | 3.57939    | 0            | 1         | 1         |
| Fam193b_j8       | 0.15126   | 0.19618    | 0            | 1         | 1         |
| H2afy            | 8.38196   | 11.1607    | 0            | 1         | 1         |
| H2afy            | 5.02259   | 5.17591    | 0            | 1         | 1         |
| H2afy            | 5.04675   | 4.43457    | 0            | 1         | 1         |
| Tifab            | 0.157601  | 0.281179   | 0.835218     | 0.0723217 | 0.323621  |
| Tifab            | 0.288597  | 0.283987   | -0.0232331   | 0.949639  | 0.985371  |
| Cxcl14           | 0.299018  | 0.37442    | 0.324424     | 0.448055  | 0.754671  |
| Trp7_j2          | 0.157561  | 0.00123157 | -6.99927     | 0.397077  | 0.7215    |
| Trp7_j1          | 0.107566  | 0.119786   | 0.15525      | 0.862781  | 1         |
| Trpc7            | 0.214992  | 0.0693484  | -1.63235     | 0.0411651 | 0.228129  |
| Spock1_j2        | 12.9744   | 13.896     | 0            | 1         | 1         |
| Spock1           | 41.6882   | 29.6822    | 0            | 1         | 1         |
| Klhl3_j7         | 0.495934  | 0.142472   | -1.79946     | 8.50E-05  | 0.0018666 |
| Hnrnpa0          | 30.2414   | 31.5711    | 0.0620774    | 0.506252  | 0.788746  |
| Ubqln1           | 40.3619   | 39.7661    | 0            | 1         | 1         |
| Ubqln1           | 25.1786   | 25.1582    | 0            | 1         | 1         |
| Gkap1_j2         | 5.04697   | 5.07417    | 0.0077527    | 0.968194  | 0.991026  |
| Gkap1_j3         | 1.83995   | 1.89349    | 0.0413801    | 0.885399  | 0.963679  |
| 2210016F16Rik    | 3.5109    | 4.05525    | 0.207952     | 0.120668  | 0.43269   |
| Hnrnpk_j2        | 0.408823  | 0.388674   | 0            | 1         | 1         |
| XLOC_008588      | 0.109181  | 0.0522277  | -1.06383     | 0.545487  | 1         |
| Agtbbp1_j3       | 0.0774441 | 0.0438253  | -0.821391    | 0.44668   | 1         |

|               |           |             |               |           |           |
|---------------|-----------|-------------|---------------|-----------|-----------|
| Agtpbp1_j8    | 2.10004   | 1.03616     | -1.01917      | 6.31E-05  | 0.0014558 |
| Agtpbp1_j9    | 0.381161  | 0           | -1.79769e+308 | 5.58E-10  | 4.87E-08  |
| Zcchc6_j1     | 0.378719  | 0.424861    | 0             | 1         | 1         |
| Zcchc6_j3     | 3.35988   | 2.92853     | 0             | 1         | 1         |
| Zcchc6_j2     | 0.949373  | 1.16036     | 0             | 1         | 1         |
| Ctla2a_j3     | 0.479886  | 0.313559    | -0.613953     | 0.662238  | 0.871885  |
| Ctla2a        | 0.899777  | 1.42773     | 0.666079      | 0.0613085 | 0.292348  |
| Zfp935_j1     | 1.58736   | 0.739098    | 0             | 1         | 1         |
| XLOC_008605   | 3.66941   | 3.61774     | -0.0204584    | 0.91507   | 0.973508  |
| Fbp2          | 1.6548    | 1.42499     | -0.215701     | 0.353153  | 0.689667  |
| Fbp1          | 1.21236   | 1.35082     | 0.156021      | 0.59541   | 0.838859  |
| Fbp1_j3       | 0.453957  | 0.22354     | -1.02203      | 0.17495   | 0.513197  |
| XLOC_008607   | 0.144044  | 0.0390185   | -1.88428      | 0.533635  | 0.805224  |
| XLOC_008608   | 0.0992321 | 0           | -1.79769e+308 | 0.0153566 | 1         |
| Ptch1_j2      | 0.0445603 | 0.242025    | 0             | 1         | 1         |
| Ptch1_j1      | 1.13628   | 0.594983    | 0             | 1         | 1         |
| Ptch1_j4      | 0.935807  | 1.3627      | 0             | 1         | 1         |
| Slc35d2_j10   | 0.440097  | 0.243199    | -0.855683     | 0.0893176 | 0.36636   |
| Slc35d2       | 0.716241  | 0.671945    | -0.0921009    | 0.801275  | 0.933741  |
| Slc35d2_j9    | 0.326634  | 0.370337    | 0.181162      | 0.7354    | 0.906746  |
| Zfp367_j1     | 1.32237   | 6.09981     | 0             | 1         | 1         |
| Zfp367_j2     | 3.11937   | 1.53166     | 0             | 1         | 1         |
| Zfp367_j3     | 4.61524   | 4.17864     | 0             | 1         | 1         |
| Zfp367        | 1.02487   | 1.94257     | 0             | 1         | 1         |
| Cdc14b_j6     | 0.160414  | 0.184665    | 0             | 1         | 1         |
| 1110018J18Rik | 7.54856   | 7.76058     | 0.0399621     | 0.735879  | 0.907056  |
| Ctsl_j2       | 278.352   | 344.834     | 0             | 1         | 1         |
| Ctsl          | 142.991   | 152.138     | 0             | 1         | 1         |
| Cntnap3       | 0.258754  | 0.215893    | -0.261261     | 0.415679  | 0.733395  |
| Hiatl1        | 10.1359   | 8.67043     | -0.225298     | 0.0505262 | 0.260181  |
| Mterfd1       | 6.00388   | 6.45845     | 0.105294      | 0.454056  | 0.758413  |
| Zfp712        | 0.451688  | 0.502225    | 0.153007      | 0.642271  | 0.862006  |
| Zfp712_j2     | 0.175967  | 0.283913    | 0.690144      | 0.19317   | 0.535528  |
| Zfp708        | 0.589937  | 0.635113    | 0.106452      | 0.772471  | 0.922818  |
| Zfp708_j4     | 0.720313  | 0.460873    | -0.644255     | 0.134104  | 0.455829  |
| Zfp595_j1     | 0.193061  | 0.0362768   | -2.41194      | 0.0114643 | 0.0947661 |
| Zfp85-rs1_j1  | 0.606335  | 0.476242    | -0.348421     | 0.14321   | 0.470211  |
| Mtrr_j2       | 1.70071   | 1.54819     | -0.135558     | 0.521139  | 0.798005  |
| Mtrr          | 0.578457  | 0.514518    | -0.168988     | 0.62918   | 0.855844  |
| Mtrr          | 0.217557  | 0.389899    | 0.841708      | 0.0611957 | 0.291953  |
| Adcy2         | 8.50967   | 7.39599     | 0             | 1         | 1         |
| Ube2ql1_j1    | 26.488    | 27.7724     | 0.068312      | 0.546952  | 0.813293  |
| Ube2ql1       | 21.3309   | 19.8819     | -0.101489     | 0.31658   | 0.660102  |
| BC018507_j1   | 6.55684   | 6.81382     | 0             | 1         | 1         |
| BC018507_j2   | 0.532688  | 0.270688    | 0             | 1         | 1         |
| BC018507_j3   | 3.10172   | 3.02087     | 0             | 1         | 1         |
| Adamts16_j3   | 0.264662  | 0.000105675 | -11.2903      | 0.916342  | 0.973929  |

|             |           |                 |            |           |           |
|-------------|-----------|-----------------|------------|-----------|-----------|
| Ndufs6      | 2.37707   | 2.81953         | 0.246274   | 0.51774   | 0.795966  |
| Slc6a19_j1  | 7.86891   | 9.05041         | 0          | 1         | 1         |
| Nkd2        | 0.859362  | 0.497736        | -0.787884  | 0.0025868 | 0.0306619 |
| Trip13_j1   | 0.0740366 | 0 -1.79769e+308 |            | 0.0268199 | 1         |
| Gm6263      | 16.1732   | 17.7122         | 0          | 1         | 1         |
| Cep72_j1    | 0.188382  | 0.0601829       | -1.64624   | 0.128469  | 0.446769  |
| Exoc3_j2    | 5.3018    | 5.33611         | 0          | 1         | 1         |
| Exoc3       | 3.8037    | 2.46452         | 0          | 1         | 1         |
| Ahrr_j7     | 0.0733391 | 0 -1.79769e+308 |            | 0.0013677 | 1         |
| Ahrr        | 0.224303  | 0.271546        | 0.275746   | 0.485387  | 0.777011  |
| Pdcd6_j1    | 9.14406   | 10.0885         | 0.141808   | 0.377949  | 0.709577  |
| Pdcd6       | 20.4404   | 23.3607         | 0.192659   | 0.0996657 | 0.390857  |
| Sdha        | 62.4577   | 51.5602         | 0          | 1         | 1         |
| Zfp72_j2    | 0.528168  | 0.409636        | -0.366653  | 0.307099  | 0.652144  |
| Zfp72_j1    | 1.18529   | 1.20427         | 0.0229219  | 0.91239   | 0.972389  |
| XLOC_008659 | 0.0585815 | 0.164153        | 1.48652    | 0.100882  | 0.393239  |
| XLOC_008659 | 0.140442  | 0 -1.79769e+308 |            | 0.000168  | 0.0033202 |
| Cast        | 11.1171   | 8.73086         | 0          | 1         | 1         |
| Rhobtb3     | 0.826799  | 0.667968        | 0          | 1         | 1         |
| Gm15528     | 1.6497    | 1.76898         | 0          | 1         | 1         |
| Rfesd       | 1.55435   | 1.55577         | 0.00131601 | 0.994603  | 0.998455  |
| Rfesd       | 0.479958  | 0.442076        | -0.118614  | 0.741322  | 0.909259  |
| Arsk_j5     | 0.323162  | 0.143005        | -1.17619   | 0.0762322 | 0.333565  |
| Arsk        | 0.881236  | 0.894306        | 0.0212397  | 0.937796  | 0.980993  |
| Ankrd32_j3  | 0.461407  | 0.342162        | 0          | 1         | 1         |
| Ankrd32     | 0.900367  | 0.317396        | 0          | 1         | 1         |
| Nr2f1_j2    | 2.96376   | 0.283456        | 0          | 1         | 1         |
| Nr2f1       | 3.72299   | 3.61637         | 0          | 1         | 1         |
| Polr3g_j1   | 21.7951   | 17.4832         | 0          | 1         | 1         |
| Polr3g      | 11.5447   | 9.04095         | 0          | 1         | 1         |
| Rasa1_j1    | 4.07437   | 3.36386         | 0          | 1         | 1         |
| Rasa1       | 3.02178   | 2.38477         | 0          | 1         | 1         |
| Cox7c_j2    | 0.812043  | 0.953876        | 0.232245   | 0.524645  | 0.800245  |
| Cox7c_j1    | 0.93035   | 0.958696        | 0.0432996  | 0.905683  | 0.969999  |
| Xrcc4_j2    | 0.984039  | 0.430494        | -1.19272   | 0.0238423 | 0.158978  |
| Xrcc4       | 2.90184   | 3.75312         | 0.371124   | 0.0653994 | 0.30477   |
| Xrcc4_j3    | 0.448152  | 0 -1.79769e+308 |            | 0.0001685 | 0.0033242 |
| Atp6ap1l    | 3.32987   | 1.98511         | -0.746249  | 0.0020647 | 0.0256313 |
| Atg10_j2    | 0.089918  | 0 -1.79769e+308 |            | 0.0567325 | 1         |
| Atg10_j3    | 0.225527  | 0.0771274       | -1.54798   | 0.197015  | 0.539845  |
| Zcchc9      | 3.98859   | 4.46782         | 0.163691   | 0.323896  | 0.666968  |
| Rasgrf2_j3  | 0.163368  | 0.260201        | 0          | 1         | 1         |
| Rasgrf2_j4  | 1.89207   | 2.80946         | 0          | 1         | 1         |
| Msh3_j5     | 0.71432   | 0.109491        | 0          | 1         | 1         |
| Msh3        | 0.10385   | 0.282049        | 0          | 1         | 1         |
| Fam151b     | 0.263248  | 0.185756        | -0.503013  | 0.451529  | 0.756717  |
| Fam151b     | 0.965201  | 0.901728        | -0.0981373 | 0.71389   | 0.896298  |

|             |           |                 |            |           |           |
|-------------|-----------|-----------------|------------|-----------|-----------|
| Zfyve16     | 0.545442  | 0.593585        | 0.122029   | 0.578179  | 0.830224  |
| Papd4_j2    | 0.22355   | 0.221947        | -0.0103805 | 0.977675  | 0.993558  |
| Papd4_j5    | 0.112616  | 0.119336        | 0.0836093  | 0.939465  | 1         |
| Papd4_j7    | 0.181765  | 0.128088        | -0.504936  | 0.681023  | 0.880114  |
| Jmy         | 5.17492   | 4.65459         | -0.152881  | 0.137977  | 0.461744  |
| Scamp1_j2   | 0.357519  | 0.07816         | 0          | 1         | 1         |
| Scamp1      | 32.5872   | 24.6294         | 0          | 1         | 1         |
| Pde8b_j7    | 0.541724  | 0.546182        | 0          | 1         | 1         |
| Pde8b_j6    | 1.50805   | 1.51652         | 0          | 1         | 1         |
| Aggf1       | 4.9036    | 4.63431         | -0.0814879 | 0.550798  | 0.815552  |
| F2rl1       | 0.221603  | 0.189396        | -0.226571  | 0.669079  | 0.874746  |
| F2r         | 5.89956   | 3.28325         | -0.845485  | 2.72E-10  | 2.52E-08  |
| lqgap2_j4   | 0.0641885 | 0.0185838       | -1.78827   | 0.197491  | 1         |
| lqgap2      | 0.564367  | 0.481994        | -0.227618  | 0.364985  | 0.698835  |
| Sv2c_j1     | 7.88897   | 4.78162         | 0          | 1         | 1         |
| Sv2c        | 3.16226   | 2.67953         | 0          | 1         | 1         |
| Hmgcr_j3    | 2.09521   | 0               | 0          | 1         | 1         |
| Hmgcr       | 14.0307   | 13.5209         | 0          | 1         | 1         |
| Gm6169      | 13.7717   | 18.8423         | 0          | 1         | 1         |
| Nsa2_j2     | 0.278288  | 0.722176        | 0          | 1         | 1         |
| Hexb        | 5.49365   | 5.48351         | 0          | 1         | 1         |
| Utp15       | 4.36916   | 4.3828          | 0.00449407 | 0.972108  | 0.991962  |
| Btf3        | 1.36168   | 2.14938         | 0.658531   | 0.0062264 | 0.0602899 |
| Fcho2_j3    | 0.984419  | 0.849735        | 0          | 1         | 1         |
| Tnpo1_j1    | 0.46938   | 0.207974        | -1.17435   | 0.0892518 | 0.366263  |
| Ptcd2_j1    | 5.69194   | 6.14131         | 0          | 1         | 1         |
| Ptcd2_j2    | 5.69194   | 6.14131         | 0          | 1         | 1         |
| Ptcd2       | 8.10242   | 6.10522         | 0          | 1         | 1         |
| Mtap1b      | 134.314   | 0               | 0          | 1         | 1         |
| Mccc2       | 5.55831   | 3.72324         | -0.578087  | 0.0004363 | 0.0072568 |
| Bdp1_j8     | 0.0683069 | 0.0173443       | -1.97757   | 0.0498286 | 1         |
| Bdp1_j6     | 0.0660967 | 0 -1.79769e+308 |            | 1.45E-05  | 1         |
| Naip1_j1    | 0.242821  | 0.163695        | -0.56888   | 0.348385  | 0.686685  |
| Gtf2h2_j1   | 5.50416   | 3.72539         | 0          | 1         | 1         |
| Gtf2h2_j2   | 3.11169   | 4.0738          | 0          | 1         | 1         |
| Ocln        | 0.172305  | 0.107522        | -0.680328  | 0.298062  | 0.644674  |
| Marveld2    | 0.28053   | 0.102225        | -1.45641   | 0.0330141 | 0.197926  |
| Marveld2_j2 | 0.082355  | 0.0784574       | -0.0699454 | 0.940976  | 1         |
| Rad17       | 1.1641    | 0.815458        | 0          | 1         | 1         |
| Cdk7        | 6.15744   | 5.13308         | -0.262506  | 0.007574  | 0.0698605 |
| Cenph       | 0.599071  | 0.535842        | -0.160921  | 0.64402   | 0.862786  |
| Pik3r1_j3   | 8.05336   | 7.23051         | 0          | 1         | 1         |
| Pik3r1_j4   | 0.075395  | 0               | 0          | 1         | 1         |
| XLOC_008740 | 0.289741  | 0 -1.79769e+308 |            | 0.0166146 | 0.123756  |
| Mast4_j5    | 0.238321  | 0.0495885       | 0          | 1         | 1         |
| Mast4_j4    | 0.0597222 | 0               | 0          | 1         | 1         |
| Mast4_j6    | 0.187804  | 0               | 0          | 1         | 1         |

|               |           |                 |            |           |           |
|---------------|-----------|-----------------|------------|-----------|-----------|
| Srsf12_j1     | 1.96592   | 1.55022         | 0          | 1         | 1         |
| Srsf12_j4     | 0.914673  | 0.821307        | 0          | 1         | 1         |
| Srsf12_j3     | 1.09907   | 0.914371        | 0          | 1         | 1         |
| Erb2ip_j2     | 1.12012   | 1.03544         | 0          | 1         | 1         |
| Erb2ip        | 1.50331   | 1.36413         | 0          | 1         | 1         |
| Nln_j3        | 0.15901   | 0.176867        | 0.153546   | 0.792295  | 0.930793  |
| Nln           | 1.95303   | 2.59443         | 0.409702   | 0.0095055 | 0.0824333 |
| 2410002O22Rik | 0.432239  | 1.08479         | 0          | 1         | 1         |
| 2410002O22Rik | 9.29047   | 9.09789         | 0          | 1         | 1         |
| Ppwd1         | 0.916566  | 0.863192        | 0          | 1         | 1         |
| Cwc27         | 6.04339   | 6.25977         | 0.05075    | 0.709958  | 0.894313  |
| Rgs7bp_j4     | 0.0963469 | 0               | 0          | 1         | 1         |
| Rgs7bp        | 18.7691   | 13.6019         | 0          | 1         | 1         |
| Rnf180        | 2.39877   | 2.1727          | 0          | 1         | 1         |
| Rnf180        | 1.04941   | 0.666275        | 0          | 1         | 1         |
| Ipo11         | 0.616566  | 0.472706        | 0          | 1         | 1         |
| Ipo11         | 5.83568   | 4.74125         | 0          | 1         | 1         |
| Ipo11_j1      | 5.32541   | 4.97921         | 0          | 1         | 1         |
| Kif2a_j5      | 6.16016   | 5.32459         | 0          | 1         | 1         |
| Kif2a_j3      | 13.7336   | 12.4718         | 0          | 1         | 1         |
| Zswim6        | 7.56882   | 6.56892         | -0.204413  | 0.0635277 | 0.298841  |
| Rab3c_j2      | 0.70962   | 0.00113008      | 0          | 1         | 1         |
| Rab3c         | 24.003    | 20.0016         | 0          | 1         | 1         |
| Gm5455        | 0.44365   | 0.518778        | 0.225694   | 0.527871  | 0.801781  |
| Gbbp1_j4      | 0.176651  | 0.139866        | 0          | 1         | 1         |
| Gbbp1         | 0.554024  | 0.963712        | 0          | 1         | 1         |
| Gbbp1         | 6.92195   | 5.22111         | 0          | 1         | 1         |
| Map3k1_j3     | 1.30632   | 0.815188        | 0          | 1         | 1         |
| Map3k1_j4     | 1.07279   | 1.04559         | 0          | 1         | 1         |
| Il31ra_j4     | 0.817133  | 0.557564        | 0          | 1         | 1         |
| Ddx4_j2       | 0.261763  | 0.147552        | -0.827037  | 0.436742  | 0.747288  |
| Ddx4          | 0.358436  | 0.28293         | -0.341271  | 0.39901   | 0.72264   |
| Ddx4_j3       | 0.16995   | 0 -1.79769e+308 |            | 7.71E-05  | 0.001717  |
| Skiv2l2       | 1.45754   | 1.19825         | 0          | 1         | 1         |
| Gpx8_j1       | 1.64893   | 1.75173         | 0.0872456  | 0.799381  | 0.933125  |
| Gpx8          | 6.70118   | 7.60091         | 0.181757   | 0.247871  | 0.595123  |
| Snx18_j1      | 0.574761  | 0.00212192      | 0          | 1         | 1         |
| Snx18_j2      | 2.94287   | 3.79611         | 0          | 1         | 1         |
| Snx18         | 4.50171   | 4.01052         | 0          | 1         | 1         |
| Ndufs4_j1     | 1.99223   | 0.647345        | -1.62178   | 0.0003505 | 0.0060585 |
| Ndufs4_j3     | 33.4482   | 38.9138         | 0.218356   | 0.130175  | 0.449234  |
| Fst           | 1.23999   | 5.22389         | 2.07479    | 0         | 0         |
| Itga2_j3      | 0.0914272 | 0.0623222       | -0.552877  | 0.457287  | 1         |
| Itga2_j2      | 0.0475158 | 0 -1.79769e+308 |            | 0.0035954 | 1         |
| Itga2_j5      | 0.0507845 | 0 -1.79769e+308 |            | 0.0022982 | 1         |
| Itga2_j4      | 0.0511428 | 0.0161619       | -1.66193   | 0.186281  | 1         |
| Pelo          | 0.878193  | 0.820751        | -0.0975941 | 0.682177  | 0.880712  |

|                  |           |           |           |           |           |
|------------------|-----------|-----------|-----------|-----------|-----------|
| Isl1_j1          | 9.86121   | 5.48972   | 0         | 1         | 1         |
| Isl1             | 18.8709   | 14.148    | 0         | 1         | 1         |
| Parp8_j4         | 0.771458  | 0.715841  | -0.107949 | 0.655036  | 0.868237  |
| Parp8            | 1.12038   | 1.17162   | 0.0645083 | 0.740468  | 0.909073  |
| Mrps30_j1        | 3.76292   | 4.93562   | 0.391381  | 0.131386  | 0.451279  |
| Mrps30           | 6.04865   | 5.5408    | -0.126517 | 0.435391  | 0.74624   |
| Gdi2             | 68.0112   | 59.1672   | 0         | 1         | 1         |
| Asb13_j1         | 2.87045   | 1.73137   | 0         | 1         | 1         |
| Pitrm1_j2        | 4.77266   | 5.11354   | 0         | 1         | 1         |
| XLOC_008072      | 0.0921749 | 0.0294984 | -1.64374  | 0.719372  | 1         |
| Dip2c_j2         | 2.66319   | 2.38697   | -0.157974 | 0.274409  | 0.623505  |
| Dip2c_j5         | 1.77774   | 1.91594   | 0.108003  | 0.51226   | 0.792044  |
| Dip2c_j6         | 13.2319   | 12.1767   | -0.119889 | 0.266916  | 0.615986  |
| Heatr1_j4        | 3.37058   | 4.41574   | 0         | 1         | 1         |
| Ero1lb_j1        | 0.485955  | 0.927633  | 0         | 1         | 1         |
| Nid1             | 4.74027   | 3.25458   | 0         | 1         | 1         |
| Lyst_j2          | 3.77636   | 4.6946    | 0         | 1         | 1         |
| Arid4b_j4        | 1.40583   | 1.04461   | 0         | 1         | 1         |
| Psma2_j3         | 4.92534   | 3.97326   | -0.309901 | 0.031762  | 0.192965  |
| Psma2_j4         | 0.488337  | 0.832323  | 0.769267  | 0.394672  | 0.719814  |
| AW209491         | 4.44807   | 4.10887   | 0         | 1         | 1         |
| 2810021B07Rik_j1 | 0.65592   | 0.925608  | 0.496882  | 0.116323  | 0.424391  |
| Amph_j3          | 36.0037   | 28.4824   | -0.338074 | 0.0004095 | 0.0068976 |
| Amph_j4          | 2.06535   | 1.72871   | -0.256692 | 0.453295  | 0.758028  |
| Elmo1_j4         | 0.541854  | 0.591723  | 0.127017  | 0.679332  | 0.879491  |
| Elmo1_j7         | 1.19751   | 1.71742   | 0.520208  | 0.0132715 | 0.105585  |
| XLOC_008097      | 0.0897272 | 0.0813631 | 0         | 1         | 1         |
| Hist1h1d         | 0.622175  | 1.14232   | 0.876577  | 0.0004081 | 0.0068837 |
| Hist1h2bc_j1     | 5.6797    | 7.10962   | 0         | 1         | 1         |
| Hist1h2bc_j2     | 9.2412    | 10.5945   | 0         | 1         | 1         |
| Hist1h2bc_j3     | 38.6218   | 45.6186   | 0         | 1         | 1         |
| Trim38           | 0.0605779 | 0.125637  | 1.0524    | 0.261324  | 1         |
| BC005537         | 72.3057   | 74.8429   | 0.0497551 | 0.561572  | 0.821809  |
| D130043K22Rik_j2 | 0.548822  | 0.517306  | 0         | 1         | 1         |
| Gpld1            | 2.64992   | 3.0007    | 0         | 1         | 1         |
| AK020728_j1      | 0.784768  | 0.460782  | 0         | 1         | 1         |
| Wrnip1_j2        | 19.0677   | 25.1068   | 0.396948  | 0.0021405 | 0.0263255 |
| Fars2            | 0.266515  | 0.196536  | -0.439424 | 0.194941  | 0.537285  |
| Pak1ip1_j4       | 1.74193   | 3.52015   | 0         | 1         | 1         |
| Sirt5            | 4.1245    | 3.72818   | -0.145748 | 0.44572   | 0.753103  |
| Sirt5_j1         | 0.37978   | 0.595452  | 0.648822  | 0.22706   | 0.574268  |
| AK038993_j1      | 0.0873727 | 0.0958965 | 0.134295  | 0.892526  | 1         |
| AK038993_j2      | 0.0762499 | 0.150892  | 0.98471   | 0.281641  | 1         |
| Cd83             | 1.03028   | 1.09834   | 0.0922838 | 0.732254  | 0.905282  |
| Jarid2_j2        | 0.211758  | 0.284158  | 0.424277  | 0.182214  | 0.522668  |
| Gmpr_j4          | 19.3306   | 15.1388   | -0.352636 | 0.0068829 | 0.0649739 |
| Kdm1b_j2         | 0.512151  | 0.801194  | 0.645581  | 0.0391279 | 0.220695  |

|                  |             |             |               |           |           |
|------------------|-------------|-------------|---------------|-----------|-----------|
| Kdm1b_j1         | 0.170081    | 0.42237     | 1.31228       | 0.0101193 | 0.0862669 |
| Rnf144b_j2       | 0.0327855   | 0.150243    | 0             | 1         | 1         |
| Ninj1_j1         | 17.8522     | 18.1654     | 0.0250917     | 0.844383  | 0.950802  |
| Bicd2_j2         | 0.1024      | 0.247943    | 1.27579       | 0.0365191 | 0.211246  |
| Ippk             | 3.16702     | 3.10036     | -0.030692     | 0.82514   | 0.943657  |
| Ippk_j1          | 0.134706    | 0.146188    | 0.118005      | 0.856759  | 1         |
| Ecm2_j1          | 0.588368    | 0.695846    | 0.242048      | 0.381977  | 0.712173  |
| Aspn             | 0.444057    | 0.527143    | 0.247448      | 0.453382  | 0.758032  |
| Nol8_j1          | 0.295871    | 0.146292    | 0             | 1         | 1         |
| Fbxw17_j3        | 3.09028     | 2.91547     | 0             | 1         | 1         |
| Nxnl2_j2         | 0.0502887   | 0.118736    | 1.23945       | 0.443718  | 1         |
| S1pr3            | 0.644249    | 0.40144     | 0             | 1         | 1         |
| Gadd45g_j1       | 3.71898     | 7.43699     | 0.999811      | 1.65E-05  | 0.0004734 |
| Sykb_j7          | 0.152833    | 0.372869    | 1.28672       | 0.0048474 | 0.0495301 |
| Sfxn1_j3         | 2.50049     | 3.07691     | 0             | 1         | 1         |
| Cdhr2_j1         | 3.74821     | 5.60562     | 0.580671      | 0.0001849 | 0.003595  |
| Tspan17_j1       | 0.14712     | 0           | -1.79769e+308 | 0.0153735 | 0.117052  |
| Zfp346_j1        | 2.01399     | 1.33442     | 0             | 1         | 1         |
| Rgs14_j2         | 0.000273977 | 0.446107    | 10.6691       | 0.755271  | 0.915526  |
| Rgs14            | 2.08837     | 1.36599     | -0.612435     | 0.0041696 | 0.0441989 |
| Tmed9_j1         | 0.715021    | 0.784623    | 0.134014      | 0.799345  | 0.933125  |
| Ddx46_j3         | 0.678449    | 0.65326     | -0.0545842    | 0.873376  | 0.959842  |
| Pcbd2_j2         | 7.01232     | 5.81736     | -0.269527     | 0.467911  | 0.766747  |
| Fbxl21           | 0.350173    | 0.000341119 | -10.0036      | 0.408137  | 0.728502  |
| Tgfb1_j3         | 3.97319     | 6.36253     | 0             | 1         | 1         |
| XLOC_008237      | 0.146807    | 0.155838    | 0.0861271     | 0.844783  | 0.950919  |
| AK015814_j5      | 0.106054    | 0.0700914   | -0.597495     | 0.684584  | 1         |
| Rmi1             | 1.50785     | 1.27872     | 0             | 1         | 1         |
| Rmi1             | 1.46232     | 0.967216    | 0             | 1         | 1         |
| Ntrk2            | 0           | 0.122407    | 0             | 1         | 1         |
| Naa35_j3         | 5.08455     | 6.46019     | 0.345456      | 0.106017  | 0.404265  |
| Etohd2_j1        | 1.23528     | 1.20356     | 0             | 1         | 1         |
| Dapk1            | 0.740834    | 0.695769    | 0             | 1         | 1         |
| XLOC_008247      | 0           | 0.482031    | 1.79769e+308  | 0.0746158 | 0.329493  |
| 2010111I01Rik_j3 | 10.1495     | 9.46664     | 0             | 1         | 1         |
| Gm16133          | 1.23677     | 1.34732     | 0.12351       | 0.712545  | 0.895796  |
| Gm16133_j2       | 0.128514    | 0.121859    | -0.0767145    | 0.931962  | 1         |
| O610007P08Rik_j4 | 0.0438942   | 0.150239    | 0             | 1         | 1         |
| O610007P08Rik_j9 | 1.14425     | 1.79595     | 0             | 1         | 1         |
| Cdk20_j1         | 3.97617     | 4.38585     | 0.141477      | 0.469758  | 0.76774   |
| Cdk20_j2         | 8.83224     | 10.1172     | 0.19596       | 0.162863  | 0.498174  |
| Ptdss1_j1        | 17.7299     | 21.3842     | 0.270363      | 0.0165083 | 0.123122  |
| AK021377_j1      | 0.392792    | 0.476773    | 0.279536      | 0.656735  | 0.869053  |
| AK021377         | 0.965229    | 0.764926    | -0.335551     | 0.419569  | 0.73626   |
| XLOC_008269      | 0.153162    | 0.0841785   | -0.863532     | 0.371431  | 0.704397  |
| Zfp493_j2        | 0.185122    | 0.0211725   | -3.12822      | 0.161318  | 0.496204  |
| BC100427         | 0.186497    | 0.108432    | -0.782356     | 0.452575  | 0.757663  |



|                  |           |                 |           |           |          |
|------------------|-----------|-----------------|-----------|-----------|----------|
| Fastkd3_j2       | 1.26905   | 1.74653         | 0.46074   | 0.127468  | 0.444848 |
| Fastkd3_j1       | 0.214113  | 0.155229        | -0.463976 | 0.507062  | 0.789482 |
| 1700001L19Rik_j4 | 1.07123   | 1.92469         | 0.845351  | 0.0937095 | 0.377168 |
| Med10_j1         | 8.66908   | 10.2617         | 0.243313  | 0.140998  | 0.466982 |
| Lpcat1_j3        | 0.852034  | 0.855314        | 0         | 1         | 1        |
| Brd9_j2          | 1.03966   | 0.990457        | 0         | 1         | 1        |
| Tppp_j1          | 0.780265  | 0.607446        | 0         | 1         | 1        |
| XLOC_008292      | 1.12723   | 0.969869        | -0.216924 | 0.486209  | 0.777426 |
| Pcsk1_j2         | 1.02712   | 1.15032         | 0.163431  | 0.646269  | 0.863623 |
| Eil2_j1          | 4.48438   | 6.68634         | 0         | 1         | 1        |
| Ttc37_j6         | 2.06365   | 2.22021         | 0         | 1         | 1        |
| 2210408I21Rik    | 0.864578  | 0.720468        | 0         | 1         | 1        |
| Arrdc3_j2        | 1.58863   | 1.41326         | 0         | 1         | 1        |
| Lysmd3           | 0.607336  | 0.419684        | -0.533193 | 0.154687  | 0.487817 |
| Lysmd3_j1        | 2.7293    | 2.5198          | -0.115224 | 0.475502  | 0.771421 |
| Lysmd3_j1        | 0.145544  | 0.196922        | 0.436165  | 0.472979  | 0.769762 |
| Mef2c_j7         | 1.61196   | 0.00224511      | 0         | 1         | 1        |
| Mef2c_j10        | 0.0490702 | 0               | 0         | 1         | 1        |
| Tmem161b         | 0.550901  | 0.497709        | 0         | 1         | 1        |
| Tmem161b         | 0.547908  | 0.811655        | 0         | 1         | 1        |
| Tmem161b_j7      | 1.28309   | 1.15327         | 0         | 1         | 1        |
| Edil3            | 10.6821   | 7.23535         | 0         | 1         | 1        |
| Edil3_j3         | 38.8233   | 29.8429         | 0         | 1         | 1        |
| Edil3_j5         | 0         | 0.229596        | 0         | 1         | 1        |
| Hapln1_j1        | 0.419085  | 0.266125        | -0.655136 | 0.108286  | 0.409141 |
| Ssbp2_j5         | 20.4341   | 17.91           | -0.190218 | 0.0961695 | 0.382865 |
| Ssbp2_j9         | 11.989    | 10.6724         | -0.167835 | 0.4893    | 0.779561 |
| Serinc5_j4       | 13.8321   | 17.9061         | 0         | 1         | 1        |
| Arsb_j1          | 9.80129   | 8.21682         | -0.25439  | 0.0247003 | 0.16296  |
| Lhfp12           | 1.39721   | 2.06912         | 0         | 1         | 1        |
| Ap3b1_j7         | 1.1589    | 1.41588         | 0.288943  | 0.261522  | 0.610711 |
| Ap3b1_j8         | 3.46532   | 4.588           | 0.404876  | 0.0959963 | 0.382589 |
| Tbca             | 0.584073  | 0.404069        | 0         | 1         | 1        |
| Wdr41_j2         | 4.1707    | 4.05373         | 0         | 1         | 1        |
| Col4a3bp_j2      | 10.603    | 11.8301         | 0         | 1         | 1        |
| XLOC_008350      | 0.211428  | 0.137202        | -0.623871 | 0.353699  | 0.68999  |
| XLOC_008354      | 0.103656  | 0.121145        | 0.22493   | 0.863155  | 1        |
| Sgtb_j1          | 4.35825   | 4.65677         | 0         | 1         | 1        |
| Trim23           | 2.65969   | 1.8868          | 0         | 1         | 1        |
| Dimt1_j4         | 0.340282  | 0.290082        | 0         | 1         | 1        |
| 3830408C21Rik_j4 | 0.0697293 | 0 -1.79769e+308 | 0.0518672 | 0.0518672 | 1        |
| 3830408C21Rik_j5 | 0.191852  | 0.0791225       | -1.27783  | 0.226864  | 0.573979 |
| 3830408C21Rik_j1 | 0.203172  | 0.186096        | -0.12665  | 0.840494  | 0.949579 |
| 2810008M24Rik_j2 | 4.57442   | 5.39838         | 0         | 1         | 1        |
| Elovl7_j1        | 0.246412  | 0               | 0         | 1         | 1        |
| Elovl7_j4        | 17.5625   | 14.629          | 0         | 1         | 1        |
| Pde4d            | 0.250456  | 0.19072         | 0         | 1         | 1        |

|                  |           |           |              |           |           |
|------------------|-----------|-----------|--------------|-----------|-----------|
| Ankrd55_j3       | 0.13033   | 0.245789  | 0.915246     | 0.249592  | 0.597014  |
| XLOC_008384      | 0.0576537 | 0.10031   | 0.798975     | 0.348865  | 1         |
| Il6st_j2         | 32.7851   | 33.2278   | 0            | 1         | 1         |
| Slc38a9_j1       | 3.86827   | 3.62223   | 0            | 1         | 1         |
| Ccno_j1          | 0.0434724 | 0.205012  | 2.23754      | 0.0623507 | 0.295582  |
| BC067074_j3      | 0.129035  | 0.120854  | -0.0945002   | 0.890032  | 1         |
| XLOC_008393      | 0.0199061 | 0.109295  | 0            | 1         | 1         |
| Arl15            | 2.73178   | 2.94916   | 0            | 1         | 1         |
| Mocs2            | 46.3955   | 57.2495   | 0.303278     | 0.0019655 | 0.0246565 |
| XLOC_008398      | 0.0605636 | 0.22717   | 1.90725      | 0.173015  | 0.510725  |
| Hcn1_j1          | 8.75636   | 7.68893   | -0.187549    | 0.038815  | 0.219661  |
| Paip1            | 1.63871   | 1.68358   | 0.0389698    | 0.90328   | 0.969087  |
| Paip1_j2         | 3.81673   | 4.11681   | 0.109192     | 0.659364  | 0.870718  |
| 4833420G17Rik_j1 | 2.82008   | 2.67085   | 0            | 1         | 1         |
| Gm7120           | 1.4274    | 1.99004   | 0.479408     | 0.206325  | 0.550784  |
| BC016423_j2      | 1.40652   | 1.20869   | 0            | 1         | 1         |
| BC016423_j4      | 0.71632   | 0.676847  | -0.0817748   | 0.792877  | 0.931005  |
| Net1_j3          | 0.728509  | 0.929179  | 0.351011     | 0.267187  | 0.616108  |
| Pfkip1           | 34.5174   | 42.9132   | 0            | 1         | 1         |
| Wdr37_j3         | 3.35453   | 2.28878   | 0            | 1         | 1         |
| Gtpbp4_j1        | 0         | 0.366489  | 1.79769e+308 | 0.0041077 | 0.043742  |
| Gtpbp4_j2        | 1.14243   | 1.12877   | -0.0173588   | 0.956949  | 0.987617  |
| Zmynd11_j1       | 2.11109   | 1.50072   | 0            | 1         | 1         |
| Zmynd11_j13      | 0.714259  | 0.6608    | 0            | 1         | 1         |
| Ryr2_j1          | 3.08875   | 2.57034   | -0.265063    | 0.1817    | 0.521871  |
| Ryr2_j3          | 0.771164  | 0.984252  | 0.35199      | 0.160294  | 0.49487   |
| Ryr2_j5          | 0.909117  | 0.852687  | -0.0924493   | 1         | 1         |
| Ryr2_j15         | 0.128448  | 0.175702  | 0.451947     | 0.530175  | 0.802944  |
| Ryr2_j17         | 0.123204  | 0.201833  | 0.712117     | 0.251023  | 0.598849  |
| Gpr137b          | 0.131844  | 0.717509  | 0            | 1         | 1         |
| Tbce             | 10.4985   | 9.57611   | 0            | 1         | 1         |
| 5033411D12Rik    | 1.03058   | 0.921366  | -0.161611    | 0.611793  | 0.847126  |
| 5033411D12Rik_j3 | 0.148073  | 0.0851672 | -0.79794     | 0.229796  | 0.576876  |
| AK038969_j1      | 0.0132359 | 0.135036  | 3.35082      | 0.0182627 | 1         |
| Rala_j1          | 1.06842   | 0.563799  | 0            | 1         | 1         |
| Zkscan3          | 1.84436   | 1.81501   | 0            | 1         | 1         |
| Pgbd1_j2         | 0.010962  | 0.0849979 | 2.95492      | 0.413163  | 1         |
| Zfp187           | 0.563282  | 0.0876558 | 0            | 1         | 1         |
| Zfp187_j1        | 1.36568   | 0.66587   | 0            | 1         | 1         |
| Zfp187_j2        | 2.97047   | 2.68594   | 0            | 1         | 1         |
| Zfp389_j1        | 0         | 0.0978129 | 1.79769e+308 | 0.0518692 | 1         |
| Scgn_j1          | 0.408144  | 0.202177  | -1.01346     | 0.365579  | 0.699478  |
| Gmn              | 0.719938  | 0.477711  | -0.591735    | 0.37774   | 0.709377  |
| Aldh5a1          | 2.10525   | 1.74423   | 0            | 1         | 1         |
| Nrsn1_j4         | 2.11711   | 1.18934   | 0            | 1         | 1         |
| XLOC_008472      | 0.450921  | 0.466602  | 0.0493191    | 0.911764  | 0.972265  |
| XLOC_008472      | 0         | 0.169616  | 1.79769e+308 | 0.007621  | 0.0701878 |

|                  |           |                       |            |           |           |
|------------------|-----------|-----------------------|------------|-----------|-----------|
| BC025054_j8      | 0.100242  | 0.209134              | 1.06093    | 0.314775  | 0.658963  |
| BC025054_j12     | 0.158317  | 0.151886              | -0.0598252 | 0.962013  | 0.989361  |
| BC025054_j13     | 0.473561  | 0.423823              | -0.160088  | 0.745943  | 0.911507  |
| E2f3_j2          | 1.06036   | 1.59653               | 0          | 1         | 1         |
| E2f3             | 0.95348   | 1.64718               | 0          | 1         | 1         |
| Gmds_j1          | 0.0580504 | 0 -1.79769e+308       |            | 0.170221  | 1         |
| Serpinb1a_j1     | 5.07049   | 12.2912               | 1.27743    | 4.44E-16  | 1.02E-13  |
| Serpinb1a_j2     | 3.43139   | 3.54837               | 0.0483621  | 0.81554   | 0.93995   |
| Serpinb6a        | 185.414   | 186.443               | 0          | 1         | 1         |
| Tubb2a_j2        | 16.5942   | 21.0003               | 0          | 1         | 1         |
| Tubb2a_j3        | 0.739034  | 1.94928               | 0          | 1         | 1         |
| Peci_j3          | 3.76403   | 1.32099               | 0          | 1         | 1         |
| Nrn1_j1          | 16.1858   | 25.0463               | 0          | 1         | 1         |
| Txndc5           | 0.41678   | 0.205065              | 0          | 1         | 1         |
| Slc35b3_j3       | 1.0874    | 1.64571               | 0.597831   | 0.0705947 | 0.319377  |
| Tcfap2a          | 0.0531189 | 0.143592              | 1.43467    | 0.0518591 | 1         |
| AK043285_j1      | 2.26755   | 2.50659               | 0          | 1         | 1         |
| AK043285_j2      | 48.873    | 59.6529               | 0          | 1         | 1         |
| XLOC_008517      | 0.0155832 | 0.0736652             | 2.24099    | 0.338651  | 1         |
| Dtnbp1_j3        | 0.625484  | 0.498952              | -0.326071  | 0.540966  | 0.809122  |
| Atxn1_j7         | 0.0323125 | 0.0786642             | 1.28362    | 0.49287   | 1         |
| Tpmt_j3          | 2.67128   | 2.63499               | -0.0197345 | 0.913203  | 0.972756  |
| Dek_j1           | 7.49795   | 7.57489               | 0.0147296  | 0.908047  | 0.971016  |
| XLOC_008527      | 0.120902  | 0.0933557             | 0          | 1         | 1         |
| XLOC_008527      | 0.0768083 | 0.0198315             | 0          | 1         | 1         |
| Ptpdc1_j4        | 1.14179   | 0.226727              | 0          | 1         | 1         |
| 1110007C09Rik_j1 | 6.87244   | 8.20648               | 0          | 1         | 1         |
| Cenpp            | 0.306778  | 0.404106              | 0.397541   | 0.327415  | 0.670276  |
| Gm15440_j1       | 3.87907   | 5.78649               | 0          | 1         | 1         |
| Sema4d           | 8.79863   | 8.46678               | 0          | 1         | 1         |
| Auh_j6           | 20.2521   | 18.5401               | 0          | 1         | 1         |
| XLOC_008553      | 0.0903674 | 0.0647035             | -0.481958  | 0.678974  | 1         |
| 4833439L19Rik_j1 | 9.62263   | 10.4191               | 0          | 1         | 1         |
| Nop16            | 2.42439   | 2.71258               | 0.162043   | 0.368476  | 0.701721  |
| Cltb             | 0.130496  | 0.140723              | 0          | 1         | 1         |
| Rnf44            | 4.11083   | 4.80993               | 0          | 1         | 1         |
| Rnf44_j10        | 0         | 0.702223              | 0          | 1         | 1         |
| Rnf44            | 5.16985   | 2.56788               | 0          | 1         | 1         |
| Rnf44_j11        | 1.3623    | 1.65962               | 0          | 1         | 1         |
| Gprin1_j2        | 1.82545   | 3.13209               | 0          | 1         | 1         |
| Sncb             | 58.7491   | 72.4587               | 0.302592   | 0.0009085 | 0.0132574 |
| Hk3_j2           | 0         | 0.107976              | 0          | 1         | 1         |
| Rab24_j2         | 5.93662   | 6.74946               | 0.185131   | 0.215607  | 0.561479  |
| Dbn1             | 29.4017   | 37.2593               | 0          | 1         | 1         |
| Pdlim7_j1        | 0.140189  | 0.144531              | 0.0440083  | 0.949223  | 0.985343  |
| Pdlim7_j2        | 0         | 0.299115 1.79769e+308 |            | 0.0001865 | 0.0036204 |
| Ddx41_j5         | 0.461887  | 0.39159               | 0          | 1         | 1         |

|                  |           |                      |            |           |           |
|------------------|-----------|----------------------|------------|-----------|-----------|
| Ddx41_j2         | 1.64521   | 1.0831               | 0          | 1         | 1         |
| Ddx41_j4         | 0.441795  | 1.06778              | 0          | 1         | 1         |
| Fam193b_j1       | 1.03762   | 1.08551              | 0          | 1         | 1         |
| XLOC_008578      | 0.0917257 | 0.0759008            | -0.273211  | 0.795678  | 1         |
| Gkap1_j7         | 0.0948958 | 0.238538             | 1.3298     | 0.0010168 | 0.0144917 |
| Hnrnpk_j7        | 0.250873  | 0.387442             | 0          | 1         | 1         |
| Hnrnpk_j8        | 0.626208  | 0.488548             | 0          | 1         | 1         |
| Agtpbp1          | 61.0615   | 73.4931              | 0.267346   | 0.001836  | 0.0233405 |
| Golm1            | 2.6142    | 3.08465              | 0.238737   | 0.120957  | 0.433073  |
| Zcchc6_j5        | 0.802215  | 0.902369             | 0          | 1         | 1         |
| Gm3604_j2        | 0.918196  | 0.507563             | -0.855216  | 0.010299  | 0.0874318 |
| 6720489N17Rik_j2 | 0         | 0.210585             | 0          | 1         | 1         |
| 6720489N17Rik    | 1.0461    | 0.725031             | 0          | 1         | 1         |
| XLOC_008604      | 0.322303  | 0.262039             | 0          | 1         | 1         |
| BC064714_j1      | 0         | 0.133665             | 0          | 1         | 1         |
| Ptch1_j3         | 0.103209  | 0.0335467            | 0          | 1         | 1         |
| Cdc14b_j4        | 0.0491275 | 0.0533345            | 0          | 1         | 1         |
| Cntnap3_j2       | 0.382437  | 0 -1.79769e+308      |            | 1.63E-15  | 3.46E-13  |
| Uqcrb_j1         | 12.4475   | 12.7566              | 0          | 1         | 1         |
| BC038328         | 0.197338  | 0.222476             | 0.172979   | 0.844783  | 0.950919  |
| XLOC_008623      | 0.379811  | 0.340334             | -0.15833   | 0.728517  | 0.903756  |
| Zfp874b_j3       | 1.63543   | 1.93823              | 0          | 1         | 1         |
| Adcy2_j5         | 0         | 0.0520823            | 0          | 1         | 1         |
| Papd7_j1         | 1.40709   | 2.03393              | 0          | 1         | 1         |
| Papd7            | 1.27883   | 1.47274              | 0          | 1         | 1         |
| Papd7            | 2.72631   | 2.10184              | 0          | 1         | 1         |
| BC018507_j5      | 0.177888  | 0.365187             | 0          | 1         | 1         |
| Ndufs6           | 13.1623   | 14.0224              | 0.0913195  | 0.685535  | 0.882667  |
| Nkd2             | 0         | 0.18004 1.79769e+308 |            | 0.0003941 | 0.0066953 |
| Zfp72_j3         | 0.101583  | 0.0272557            | -1.89803   | 0.382651  | 1         |
| Zfp825_j1        | 1.51059   | 1.7609               | 0.221202   | 0.684542  | 0.882071  |
| XLOC_008662      | 1.21849   | 1.39028              | 0.190281   | 0.808545  | 0.937072  |
| Cast_j1          | 0.734478  | 0.474831             | 0          | 1         | 1         |
| Cast_j2          | 4.91907   | 6.32334              | 0          | 1         | 1         |
| XLOC_008664      | 0.0588123 | 0.0814873            | 0.470456   | 0.713304  | 1         |
| Rhobtb3_j2       | 2.84286   | 2.35588              | 0          | 1         | 1         |
| Rfesd_j1         | 5.76455   | 5.9342               | 0.0418436  | 0.870776  | 0.958808  |
| Rfesd_j1         | 6.93893   | 6.25765              | -0.149094  | 0.467601  | 0.766717  |
| Ankrd32_j1       | 1.73896   | 1.13542              | 0          | 1         | 1         |
| AK082072         | 0.184839  | 0.216421             | 0.227575   | 0.841281  | 0.949906  |
| Vcan_j1          | 0.400968  | 0.604507             | 0.592272   | 0.116155  | 0.424174  |
| Atg10_j4         | 1.56031   | 1.24259              | -0.328481  | 0.359271  | 0.694581  |
| Atg10            | 1.45419   | 1.61762              | 0.153657   | 0.584165  | 0.833307  |
| Atg10_j5         | 5.07852   | 4.75557              | -0.0947908 | 0.595428  | 0.838859  |
| Rasgrf2_j1       | 0.0398014 | 0.600626             | 0          | 1         | 1         |
| Msh3_j8          | 0.0474181 | 0                    | 0          | 1         | 1         |
| Zfyve16_j2       | 0.146576  | 0.289868             | 0.983748   | 0.111376  | 0.415457  |

|                  |           |           |               |           |           |
|------------------|-----------|-----------|---------------|-----------|-----------|
| Cmya5            | 0.130448  | 0.0747848 | -0.802661     | 0.324103  | 1         |
| Jmy_j1           | 0.274746  | 0.285009  | 0.0529119     | 0.874072  | 0.959954  |
| Bhmt2_j1         | 0.0595737 | 0.08267   | 0.47269       | 0.758959  | 1         |
| Pde8b_j1         | 0         | 0.196215  | 0             | 1         | 1         |
| Aggf1_j1         | 8.60619   | 9.68753   | 0.170755      | 0.19204   | 0.534179  |
| Sv2c_j4          | 0         | 0.0979574 | 0             | 1         | 1         |
| Hmgcr_j1         | 8.4042    | 5.98561   | 0             | 1         | 1         |
| Nsa2_j1          | 2.96929   | 2.81894   | 0             | 1         | 1         |
| Hexb_j2          | 10.008    | 9.30478   | 0             | 1         | 1         |
| Rgref_j2         | 0.592284  | 0.89133   | 0.589671      | 0.253219  | 0.601204  |
| Utp15_j1         | 0.143355  | 0.0404902 | -1.82394      | 0.088176  | 0.363523  |
| Btf3             | 0.938206  | 1.63894   | 0.804787      | 0.0175981 | 0.128774  |
| Mtap1b_j1        | 133.699   | 0         | 0             | 1         | 1         |
| Mtap1b_j2        | 123.334   | 0         | 0             | 1         | 1         |
| Cartpt           | 3.05796   | 2.65798   | -0.202237     | 0.405089  | 0.726949  |
| Cartpt           | 0.483714  | 0.421608  | -0.198252     | 0.760112  | 0.917387  |
| Bdp1_j9          | 0.674031  | 0.972737  | 0.529234      | 0.008403  | 0.0752421 |
| Marveld2_j1      | 0         | 0.195929  | 1.79769e+308  | 0.0135659 | 0.107124  |
| Pik3r1_j5        | 0.307656  | 0         | 0             | 1         | 1         |
| Pik3r1_j2        | 0.137191  | 0.295137  | 0             | 1         | 1         |
| Srsf12_j2        | 2.43154   | 2.8748    | 0             | 1         | 1         |
| Erbp2ip_j1       | 0.138055  | 0.190742  | 0             | 1         | 1         |
| Nln_j1           | 0.386961  | 0.620154  | 0.680437      | 0.100504  | 0.392473  |
| 2410002O22Rik_j2 | 8.32473   | 7.01223   | 0             | 1         | 1         |
| Rgs7bp_j3        | 0.538847  | 0.692341  | 0             | 1         | 1         |
| Ipo11_j2         | 7.79383   | 9.16409   | 0             | 1         | 1         |
| Kif2a_j1         | 2.36235   | 1.66549   | 0             | 1         | 1         |
| Kif2a_j2         | 0.257012  | 1.002     | 0             | 1         | 1         |
| Gppb1_j5         | 0.052137  | 0.788417  | 0             | 1         | 1         |
| Il31ra_j8        | 1.22653   | 0.919308  | 0             | 1         | 1         |
| Skiv2l2_j1       | 21.4269   | 20.1295   | 0             | 1         | 1         |
| Skiv2l2_j2       | 13.3151   | 12.2506   | 0             | 1         | 1         |
| Ndufs4           | 2.87509   | 2.52407   | -0.187858     | 0.466286  | 0.765993  |
| Fst              | 0.0318626 | 0.0783381 | 1.29785       | 0.281455  | 1         |
| Itga1_j3         | 8.82978   | 8.42382   | -0.0679039    | 0.625197  | 0.853782  |
| Pelota           | 0.459176  | 0.419616  | -0.129976     | 0.850555  | 0.952491  |
| Isl1_j3          | 3.84481   | 4.89473   | 0             | 1         | 1         |
| Parp8_j5         | 9.3899    | 10.0797   | 0.102273      | 0.53133   | 0.8035    |
| Akr1c13          | 0.16859   | 0.21394   | 0.343688      | 0.687493  | 0.883849  |
| Akr1c19          | 0.0976876 | 0.0712012 | -0.456273     | 0.461023  | 1         |
| Akr1c19_j2       | 0.0496133 | 0         | -1.79769e+308 | 0.0085635 | 1         |
| Larp4b_j1        | 0.0428805 | 0.267474  | 2.641         | 3.40E-05  | 0.0008609 |
| XLOC_008072      | 0.193341  | 0.12855   | -0.588818     | 0.567324  | 0.824874  |
| Dip2c_j4         | 1.18727   | 0.752518  | -0.657853     | 0.0034204 | 0.038217  |
| XLOC_008076      | 0.24049   | 0         | -1.79769e+308 | 0.0204362 | 0.143038  |
| Lyst             | 0.0646113 | 0.0303385 | 0             | 1         | 1         |
| B3galnt2_j1      | 1.46884   | 1.49185   | 0             | 1         | 1         |

|                  |           |                 |            |           |           |
|------------------|-----------|-----------------|------------|-----------|-----------|
| Arid4b_j1        | 0.258944  | 0.19102         | 0          | 1         | 1         |
| Arid4b_j5        | 1.77302   | 2.20656         | 0          | 1         | 1         |
| Psm2_j6          | 0.997416  | 0.617601        | -0.691522  | 0.352955  | 0.689667  |
| Vps41_j3         | 8.01834   | 8.38239         | 0          | 1         | 1         |
| Vps41            | 23.175    | 16.8121         | 0          | 1         | 1         |
| Vps41_j7         | 13.2863   | 16.1605         | 0          | 1         | 1         |
| Amph_j1          | 0.637864  | 0.704035        | 0.142398   | 0.713072  | 0.896204  |
| Amph_j5          | 0.680946  | 1.68285         | 1.30529    | 0.0021692 | 0.0266048 |
| Trim27_j4        | 5.75132   | 5.77606         | 0.00619146 | 0.977626  | 0.993549  |
| XLOC_008097      | 0.295294  | 0.0349698       | 0          | 1         | 1         |
| XLOC_008097      | 0.233383  | 0.0532484       | 0          | 1         | 1         |
| Fam65b_j1        | 0.161606  | 0.00387549      | -5.38196   | 0.149641  | 0.479222  |
| Fam65b_j5        | 0.20216   | 0.0259015       | -2.96438   | 0.146623  | 0.474993  |
| D130043K22Rik_j4 | 7.1246    | 6.4208          | 0          | 1         | 1         |
| D130043K22Rik_j5 | 5.4772    | 5.27828         | 0          | 1         | 1         |
| Gpld1_j1         | 0.501103  | 0.394717        | 0          | 1         | 1         |
| AK020728_j4      | 2.01602   | 1.62834         | 0          | 1         | 1         |
| AK020728_j5      | 0.121184  | 0.121431        | 0          | 1         | 1         |
| Agtr1a_j1        | 0.448661  | 0.712192        | 0.666639   | 0.142502  | 0.469152  |
| XLOC_008128      | 0.090516  | 0.179295        | 0.986087   | 0.40785   | 0.728232  |
| XLOC_008128      | 4.27E-05  | 0.648012        | 13.8903    | 0.983753  | 0.995196  |
| Prpf4b_j7        | 0.273845  | 0.411322        | 0          | 1         | 1         |
| Prpf4b_j6        | 1.07392   | 1.67349         | 0          | 1         | 1         |
| Rreb1_j2         | 0.235308  | 4.50E-05        | -12.3514   | 0.829078  | 0.944878  |
| Rreb1_j9         | 0.206608  | 0.252977        | 0.292111   | 0.535889  | 0.806316  |
| Riok1_j1         | 1.34637   | 1.41867         | 0.0754614  | 0.825495  | 0.943705  |
| Pak1ip1_j3       | 2.05509   | 2.39363         | 0          | 1         | 1         |
| Gm10790_j4       | 0.0794918 | 0 -1.79769e+308 | 0.0598631  | 0.0598631 | 1         |
| Hivep1_j7        | 5.19252   | 4.727           | -0.135509  | 0.41788   | 0.734904  |
| Phactr1          | 3.1877    | 2.17756         | 0          | 1         | 1         |
| Phactr1_j1       | 4.42085   | 4.39113         | 0          | 1         | 1         |
| AK038993_j4      | 0.223112  | 0.0956847       | -1.22141   | 0.199776  | 0.542808  |
| Jarid2           | 0.19653   | 0 -1.79769e+308 | 2.12E-08   | 1.39E-06  |           |
| Jarid2_j3        | 0.769451  | 0.279077        | -1.46316   | 4.24E-05  | 0.0010367 |
| Gmpr_j2          | 14.0335   | 9.78238         | -0.520618  | 0.0037347 | 0.0408592 |
| Gmpr_j3          | 4.82911   | 4.89629         | 0.0199317  | 0.857973  | 0.954917  |
| 5033430I15Rik_j1 | 0.487224  | 0.300759        | -0.695979  | 0.388819  | 0.716161  |
| AK053225_j1      | 0.164183  | 0.152161        | -0.109705  | 0.896826  | 0.967071  |
| Aspn             | 0.108783  | 0.103633        | -0.0699703 | 0.945617  | 1         |
| Iars_j1          | 0.138875  | 0 -1.79769e+308 | 4.57E-05   | 0.0011052 |           |
| Iars_j2          | 4.70145   | 4.51517         | -0.0583266 | 0.832463  | 0.945929  |
| Spin1_j1         | 6.52786   | 6.79127         | 0          | 1         | 1         |
| Sykb_j5          | 0.0500844 | 0 -1.79769e+308 | 0.0107263  | 0.0107263 | 1         |
| AK030238_j1      | 0.110746  | 0.047731        | -1.21426   | 0.332165  | 1         |
| Sfxn1_j1         | 0.651624  | 0.435255        | 0          | 1         | 1         |
| Hrh2_j1          | 0.311206  | 0.251367        | -0.308076  | 0.410497  | 0.730308  |
| Arl10_j2         | 0.858569  | 0.275204        | -1.64143   | 0.0953379 | 0.381208  |

|                  |           |             |               |           |          |
|------------------|-----------|-------------|---------------|-----------|----------|
| Tgfbj_j2         | 6.1137    | 11.5341     | 0             | 1         | 1        |
| XLOC_008237      | 0.330459  | 0.185965    | -0.829442     | 0.202432  | 0.546076 |
| AK015814_j3      | 0.0950268 | 0.0737752   | -0.3652       | 0.783277  | 1        |
| Ntrk2            | 3.25359   | 2.25155     | 0             | 1         | 1        |
| XLOC_008243      | 0.156699  | 0           | -1.79769e+308 | 0.0146673 | 0.113107 |
| Dapk1            | 10.282    | 9.389       | 0             | 1         | 1        |
| XLOC_008248      | 0.69583   | 0.291109    | -1.25718      | 0.172095  | 0.509298 |
| Gm16133_j3       | 0.111148  | 0.06182     | -0.846338     | 0.615378  | 1        |
| Gm16133_j4       | 0.0944007 | 0.0901712   | -0.0661311    | 0.969128  | 1        |
| 0610007P08Rik_j1 | 0.545416  | 7.34E-05    | 0             | 1         | 1        |
| XLOC_008259      | 0.213548  | 0.174118    | -0.294496     | 0.703987  | 0.891644 |
| XLOC_008269      | 0.255173  | 0.185286    | -0.461723     | 0.188144  | 0.529425 |
| 1700001L19Rik_j1 | 1.0342    | 1.12799     | 0.125232      | 0.741256  | 0.909259 |
| 1700001L19Rik_j5 | 0.354677  | 0           | -1.79769e+308 | 0.0144543 | 0.111996 |
| Nsun2_j1         | 6.38872   | 8.35481     | 0             | 1         | 1        |
| Mrpl36_j1        | 4.90673   | 5.58292     | 0.186257      | 0.28662   | 0.635428 |
| Lpcat1_j4        | 0.529669  | 0.60928     | 0             | 1         | 1        |
| XLOC_008282      | 0.104198  | 0.0330509   | -1.65657      | 0.206662  | 1        |
| Slc12a7_j2       | 1.76758   | 1.69729     | 0             | 1         | 1        |
| Brd9_j1          | 1.41295   | 1.34254     | 0             | 1         | 1        |
| Brd9_j3          | 0.866593  | 1.57928     | 0             | 1         | 1        |
| XLOC_008292      | 0.216362  | 0.101771    | -1.08813      | 0.158305  | 0.492505 |
| Ttc37_j5         | 1.62901   | 1.22821     | 0             | 1         | 1        |
| Mctp1            | 0         | 0.116046    | 1.79769e+308  | 0.0023729 | 1        |
| 2210408I21Rik_j4 | 0.184305  | 0.000138791 | 0             | 1         | 1        |
| Fam172a          | 0.559739  | 0.378755    | 0             | 1         | 1        |
| XLOC_008306      | 0.242354  | 0.108004    | -1.16603      | 0.199547  | 0.542558 |
| Cetn3_j3         | 1.76104   | 0.997824    | -0.819573     | 0.204192  | 0.548341 |
| Mef2c_j6         | 0.0477098 | 0           | 0             | 1         | 1        |
| C130071C03Rik_j5 | 0.299084  | 0.0924706   | -1.69349      | 0.233189  | 0.580492 |
| Tmem161b_j3      | 0.372826  | 0.0921472   | 0             | 1         | 1        |
| Edil3_j2         | 9.2841    | 4.03941     | 0             | 1         | 1        |
| Ssbp2_j2         | 0.0913217 | 0.103698    | 0.183356      | 0.893384  | 1        |
| Ssbp2_j3         | 0.407087  | 0.312003    | -0.383779     | 0.177891  | 0.517237 |
| Serinc5_j1       | 11.2853   | 13.2887     | 0             | 1         | 1        |
| Serinc5_j2       | 1.42974   | 0.430346    | 0             | 1         | 1        |
| Lhfpl2_j1        | 4.20502   | 4.22385     | 0             | 1         | 1        |
| Lhfpl2_j3        | 8.13159   | 9.91877     | 0             | 1         | 1        |
| Ap3b1_j6         | 0.124685  | 0.00564133  | -4.46611      | 0.16117   | 1        |
| Tbca_j1          | 0.312481  | 0.30582     | 0             | 1         | 1        |
| Zbed3_j1         | 0.588774  | 0.622715    | 0.0808577     | 0.851882  | 0.952976 |
| F2rl2_j1         | 28.9599   | 24.7627     | -0.225887     | 0.0201819 | 0.141747 |
| Col4a3bp_j1      | 10.8184   | 6.43355     | 0             | 1         | 1        |
| Gcnt4_j2         | 0.675945  | 0.10645     | -2.66673      | 1.08E-06  | 4.42E-05 |
| Gfm2             | 0.694816  | 0.703828    | 0             | 1         | 1        |
| Gfm2             | 1.70075   | 1.86587     | 0             | 1         | 1        |
| Ankra2_j1        | 1.3458    | 1.87439     | 0.477956      | 0.102692  | 0.39702  |

|                  |            |                        |            |           |           |
|------------------|------------|------------------------|------------|-----------|-----------|
| Zfp366           | 0.158688   | 0.0492509              | -1.68797   | 0.118167  | 0.427924  |
| XLOC_008354      | 0.0639765  | 0.0450604              | -0.505683  | 0.736253  | 1         |
| Smn1_j1          | 3.05135    | 3.99619                | 0.389178   | 0.128826  | 0.447279  |
| XLOC_008360      | 0.113014   | 0.0568416              | -0.991481  | 0.37596   | 1         |
| Adamts6_j1       | 0.144081   | 0.0909916              | -0.663077  | 0.321161  | 0.664254  |
| Dimt1_j5         | 0.710595   | 0.728463               | 0          | 1         | 1         |
| 3830408C21Rik    | 0.0835882  | 0.0613106              | -0.447164  | 0.712524  | 1         |
| 3830408C21Rik_j3 | 0          | 0.0841193 1.79769e+308 |            | 0.0360368 | 1         |
| 2810008M24Rik_j1 | 3.11486    | 1.4126                 | 0          | 1         | 1         |
| Elov17_j3        | 2.23859    | 1.66183                | 0          | 1         | 1         |
| Depdc1b_j1       | 0.0870441  | 0 -1.79769e+308        |            | 0.0229874 | 1         |
| Il6st_j1         | 0.606836   | 0.000545656            | 0          | 1         | 1         |
| Slc38a9_j2       | 1.28225    | 1.24211                | 0          | 1         | 1         |
| BC067074_j1      | 0.184336   | 0.136054               | -0.438152  | 0.256403  | 0.60531   |
| XLOC_008392      | 0.160575   | 0.138082               | -0.217724  | 0.656852  | 0.869092  |
| Arl15_j2         | 2.82339    | 2.51587                | 0          | 1         | 1         |
| AK016040_j1      | 0.293374   | 0.859503               | 1.55076    | 0.0092095 | 0.0806249 |
| Mocs2_j2         | 0.178223   | 0 -1.79769e+308        |            | 0.0487107 | 0.254271  |
| XLOC_008398      | 0.240037   | 9.43E-05               | -11.3129   | 0.981687  | 0.994414  |
| XLOC_008402      | 0.228528   | 0.135298               | -0.756227  | 0.195756  | 0.538344  |
| Net1_j8          | 0.143217   | 0 -1.79769e+308        |            | 0.0172451 | 0.127054  |
| Pfcp_j4          | 0.65761    | 0.338528               | 0          | 1         | 1         |
| Zmynd11_j6       | 1.91904    | 3.52064                | 0          | 1         | 1         |
| Zmynd11_j11      | 4.56517    | 4.40637                | 0          | 1         | 1         |
| Zmynd11_j7       | 5.77118    | 6.18882                | 0          | 1         | 1         |
| Chrm3_j2         | 0.272736   | 0.132781               | -1.03845   | 0.0601469 | 0.288809  |
| Ryr2_j14         | 0.201678   | 0.0563165              | -1.84042   | 3.49E-05  | 0.0008785 |
| Actn2_j6         | 0.132195   | 0.137873               | 0.0606748  | 0.954891  | 1         |
| Actn2_j8         | 0.108377   | 0.0433372              | -1.32238   | 0.254871  | 1         |
| Gpr137b_j1       | 0.351532   | 0.000545615            | 0          | 1         | 1         |
| Tbce_j1          | 4.66128    | 4.90142                | 0          | 1         | 1         |
| Ggps1_j2         | 4.26225    | 3.30285                | 0          | 1         | 1         |
| Ggps1_j1         | 0.00320898 | 0.374238               | 0          | 1         | 1         |
| Hecw1_j1         | 4.44873    | 3.54974                | 0          | 1         | 1         |
| AK085253_j1      | 0.521951   | 0.1063                 | -2.29577   | 0.030279  | 0.186863  |
| Pou6f2_j3        | 0.230692   | 0.105688               | -1.12616   | 0.293162  | 0.640163  |
| Zfp187_j5        | 2.23265    | 1.98139                | 0          | 1         | 1         |
| Zfp187           | 1.45114    | 0.780771               | 0          | 1         | 1         |
| Zfp322a_j1       | 0.416051   | 0.220205               | 0          | 1         | 1         |
| C230035116Rik_j1 | 0.101535   | 1.18E-05               | -13.066    | 0.995772  | 1         |
| Scgn_j2          | 0.162238   | 0.236299               | 0.542507   | 0.617141  | 0.849331  |
| Lrrc16a_j4       | 1.84835    | 1.66519                | -0.150554  | 0.679493  | 0.879493  |
| Lrrc16a_j5       | 1.30341    | 0.996074               | -0.387966  | 0.108633  | 0.409839  |
| Lrrc16a_j7       | 0.614028   | 0.57292                | -0.0999717 | 0.719718  | 0.899338  |
| Nrsn1_j3         | 1.02778    | 0                      | 0          | 1         | 1         |
| XLOC_008472      | 0.361538   | 0.23279                | -0.635117  | 0.0338018 | 0.201237  |
| XLOC_008473      | 0.274347   | 0.0665583              | -2.04331   | 0.207257  | 0.551757  |



|                  |           |           |               |           |           |
|------------------|-----------|-----------|---------------|-----------|-----------|
| BC025054_j4      | 0.0877001 | 0.0149659 | -2.5509       | 0.0369273 | 1         |
| Cdkal1_j1        | 0.398695  | 0         | -1.79769e+308 | 3.84E-06  | 0.0001348 |
| E2f3_j4          | 0.395907  | 0         | 0             | 1         | 1         |
| Serpinb1a_j4     | 59.4058   | 141.287   | 1.24995       | 0         | 0         |
| Serpinb6a_j3     | 0.622833  | 0.494584  | 0             | 1         | 1         |
| Serpinb6a_j8     | 7.98473   | 11.7529   | 0             | 1         | 1         |
| Serpinb6a_j9     | 58.2162   | 69.2864   | 0             | 1         | 1         |
| Peci_j1          | 9.44516   | 9.51131   | 0             | 1         | 1         |
| Peci_j2          | 7.74502   | 11.3555   | 0             | 1         | 1         |
| XLOC_008492      | 0.104851  | 0         | -1.79769e+308 | 0.0074485 | 1         |
| Txndc5_j2        | 9.51114   | 11.6844   | 0             | 1         | 1         |
| Slc35b3_j4       | 0.425922  | 0.0617845 | -2.78527      | 0.0204208 | 0.142972  |
| Slc35b3          | 0.24026   | 0.125444  | -0.937556     | 0.249859  | 0.597301  |
| 9530008L14Rik_j1 | 0.123258  | 0         | -1.79769e+308 | 0.0290468 | 1         |
| Dtnbp1_j2        | 9.40824   | 9.30862   | -0.0153579    | 0.934318  | 0.979958  |
| Atxn1_j6         | 0.0473361 | 0         | -1.79769e+308 | 0.0018358 | 1         |
| Atxn1_j5         | 0.0770546 | 0.25596   | 1.73196       | 0.0003378 | 0.005888  |
| Kif13a_j4        | 3.07387   | 4.47926   | 0             | 1         | 1         |
| Kif13a_j6        | 1.16052   | 0.856662  | 0             | 1         | 1         |
| Kif13a_j8        | 1.53691   | 1.37416   | 0             | 1         | 1         |
| Kif13a_j7        | 0.076741  | 0.256018  | 0             | 1         | 1         |
| Dek_j2           | 0.140966  | 0.265706  | 0.91448       | 0.326766  | 0.669905  |
| 4931429P17Rik_j1 | 0.235551  | 0.184037  | -0.356044     | 0.567269  | 0.824855  |
| AK039372         | 0.376019  | 0.141637  | -1.40861      | 0.0072295 | 0.0675391 |
| Zfp169_j2        | 0.20489   | 0.290377  | 0             | 1         | 1         |
| Wnk2_j5          | 0.155564  | 0.0648446 | 0             | 1         | 1         |
| 1110007C09Rik_j2 | 0.211958  | 0.275771  | 0             | 1         | 1         |
| Auh_j1           | 18.1918   | 8.55488   | 0             | 1         | 1         |
| Ror2_j2          | 0.243794  | 0         | 0             | 1         | 1         |
| Ror2_j3          | 0.289763  | 0         | 0             | 1         | 1         |
| Ror2_j4          | 0.568074  | 0.118669  | 0             | 1         | 1         |
| Sptlc1_j2        | 2.61467   | 2.38001   | -0.135665     | 0.631611  | 0.856746  |
| 4833439L19Rik_j4 | 0.130174  | 0         | 0             | 1         | 1         |
| Rnf44_j2         | 1.75589   | 2.25683   | 0             | 1         | 1         |
| Rnf44_j3         | 0.264911  | 0         | 0             | 1         | 1         |
| Rnf44_j6         | 1.59808   | 0.32024   | 0             | 1         | 1         |
| Rnf44_j5         | 0.663288  | 0.679145  | 0             | 1         | 1         |
| Gprin1_j3        | 0.552574  | 0.192244  | 0             | 1         | 1         |
| Uimc1_j6         | 0.0779971 | 0         | -1.79769e+308 | 0.0120595 | 1         |
| Pdlim7_j8        | 47.6431   | 50.3128   | 0.0786567     | 0.538327  | 0.807888  |
| Pdlim7           | 35.025    | 47.3145   | 0.433899      | 6.96E-05  | 0.0015758 |
| Tifab_j2         | 0.945514  | 0.817271  | -0.210285     | 0.565117  | 0.823689  |
| Tifab_j1         | 0.253728  | 0.279708  | 0.140637      | 0.749878  | 0.913026  |
| Trp7_j5          | 0.123869  | 0.250714  | 1.01723       | 0.353815  | 0.690055  |
| Trpc7            | 0.118018  | 0.123397  | 0.0643028     | 0.924941  | 1         |
| XLOC_008578      | 0.0972394 | 0         | -1.79769e+308 | 0.0066095 | 1         |
| Spock1_j4        | 12.6354   | 12.2532   | 0             | 1         | 1         |

|               |           |                 |            |           |           |
|---------------|-----------|-----------------|------------|-----------|-----------|
| Spock1_j5     | 4.25083   | 1.32434         | 0          | 1         | 1         |
| Klhl3_j10     | 0.319697  | 0.261252        | -0.291264  | 0.390617  | 0.717412  |
| Klhl3_j1      | 0.196446  | 0 -1.79769e+308 |            | 3.92E-10  | 3.51E-08  |
| Gkap1_j1      | 0.056487  | 0.0295351       | -0.935488  | 0.670116  | 1         |
| Gkap1_j4      | 0.428297  | 0.284335        | -0.591021  | 0.360007  | 0.69504   |
| Gkap1_j9      | 0.167876  | 0.144708        | -0.214247  | 0.809578  | 0.937682  |
| Hnrnpk_j4     | 17.2366   | 8.34243         | 0          | 1         | 1         |
| Hnrnpk_j6     | 2.10344   | 1.75467         | 0          | 1         | 1         |
| XLOC_008588   | 0.121584  | 0.0821885       | -0.564943  | 0.592045  | 1         |
| Isca1_j1      | 44.2208   | 40.5924         | -0.123515  | 0.183418  | 0.524055  |
| XLOC_008605   | 34.1592   | 34.9103         | 0.0313798  | 0.744417  | 0.910803  |
| Fancc_j3      | 1.72837   | 1.50893         | -0.195882  | 0.540307  | 0.808817  |
| Fancc         | 2.93814   | 2.34037         | -0.328166  | 0.0784577 | 0.339656  |
| Ptch1_j6      | 0.545646  | 0.593643        | 0          | 1         | 1         |
| Slc35d2_j8    | 0.211369  | 0.0351061       | -2.58997   | 0.0538261 | 0.270346  |
| Cntnap3_j6    | 0.181917  | 0.548827        | 1.59307    | 9.81E-06  | 0.0003051 |
| Zfp712_j1     | 0.331529  | 0 -1.79769e+308 |            | 2.36E-09  | 1.85E-07  |
| Zfp708_j8     | 0.164357  | 0 -1.79769e+308 |            | 0.0029988 | 0.0343998 |
| Zfp458_j1     | 0.0911714 | 0 -1.79769e+308 |            | 0.0012048 | 1         |
| XLOC_008623   | 0.207111  | 0.20808         | 0.00673426 | 0.990119  | 0.997014  |
| Zfp595        | 0.195247  | 0.0871054       | -1.16446   | 0.111489  | 0.415571  |
| Rsl1_j2       | 0.179028  | 1.22E-05        | -13.8353   | 0.989422  | 0.996683  |
| Zfp874a       | 5.34147   | 5.55622         | 0.0568666  | 0.655333  | 0.868271  |
| Zfp874b_j2    | 1.71525   | 0.833897        | 0          | 1         | 1         |
| Zfp58         | 1.45229   | 1.02615         | -0.501091  | 0.0656271 | 0.305409  |
| Zfp58         | 0.422457  | 0.256802        | -0.718148  | 0.210554  | 0.555109  |
| Adcy2_j4      | 4.30179   | 5.29299         | 0          | 1         | 1         |
| Adamts16_j7   | 0.188588  | 0.139882        | -0.431032  | 0.616315  | 0.848764  |
| Ahrr_j3       | 0.332311  | 0.30969         | -0.101711  | 0.875575  | 0.960411  |
| Ahrr_j5       | 0.167269  | 0 -1.79769e+308 |            | 1.39E-06  | 5.52E-05  |
| XLOC_008661   | 0.231608  | 0.255251        | 0.140236   | 0.728665  | 0.903788  |
| Rfesd         | 3.09837   | 3.66255         | 0.241338   | 0.531132  | 0.803433  |
| Gpr150        | 0.615039  | 0.602659        | -0.0293366 | 0.916837  | 0.97399   |
| Arsk_j2       | 0.133437  | 0.0907807       | -0.555701  | 0.519644  | 1         |
| Ankrd32_j4    | 0.533023  | 0.640415        | 0          | 1         | 1         |
| Nr2f1_j3      | 4.17452   | 2.95691         | 0          | 1         | 1         |
| Rasa1_j3      | 2.36808   | 2.44815         | 0          | 1         | 1         |
| 4833422C13Rik | 0.428584  | 0.287844        | -0.574292  | 0.0548617 | 0.273143  |
| Zcchc9_j1     | 2.48239   | 2.05859         | -0.270073  | 0.485195  | 0.776889  |
| Rasgrf2_j6    | 0.0108028 | 1.76284         | 0          | 1         | 1         |
| Rasgrf2_j7    | 0.505915  | 0.846551        | 0          | 1         | 1         |
| Msh3_j7       | 2.05167   | 2.47451         | 0          | 1         | 1         |
| Thbs4         | 0.213079  | 0.348858        | 0.711248   | 0.100259  | 0.391938  |
| Papd4_j3      | 0.279295  | 0.174385        | -0.679511  | 0.385598  | 0.71417   |
| Papd4_j4      | 0.253718  | 0.211989        | -0.259235  | 0.452828  | 0.757789  |
| Pde8b_j4      | 0.513991  | 0.353786        | 0          | 1         | 1         |
| lqgap2_j1     | 0.241851  | 0.135542        | -0.835378  | 0.159176  | 0.493821  |

|               |           |                       |           |           |           |
|---------------|-----------|-----------------------|-----------|-----------|-----------|
| Sv2c_j2       | 0.517816  | 1.06947               | 0         | 1         | 1         |
| Sv2c_j3       | 15.463    | 12.3541               | 0         | 1         | 1         |
| XLOC_008705   | 0.22787   | 0.183766              | -0.310347 | 0.678297  | 0.879015  |
| Polk_j1       | 0.720871  | 0.910544              | 0         | 1         | 1         |
| Polk_j3       | 0.262839  | 0.0729237             | 0         | 1         | 1         |
| Polk_j4       | 0.253145  | 0.117867              | 0         | 1         | 1         |
| Polk          | 0.785154  | 0.914787              | 0         | 1         | 1         |
| Rgref_j1      | 1.63412   | 1.84553               | 0.175522  | 0.2921    | 0.638961  |
| Btf3_j2       | 0.692542  | 0.709307              | 0.0345073 | 0.937737  | 0.980993  |
| Fcho2_j4      | 2.34848   | 2.74975               | 0         | 1         | 1         |
| Tnpo1_j5      | 0.639808  | 0.166699              | -1.94039  | 0.0266561 | 0.17177   |
| XLOC_008721   | 0.125833  | 0.0832866             | -0.595359 | 0.415229  | 1         |
| Bdp1_j3       | 0.189238  | 0.25095               | 0.407196  | 0.2182    | 0.564577  |
| Gtf2h2        | 3.66061   | 3.41128               | 0         | 1         | 1         |
| Mrps36_j1     | 1.07549   | 0.212362              | -2.34039  | 0.0769776 | 0.335484  |
| Slc30a5_j1    | 1.11743   | 0.699639              | 0         | 1         | 1         |
| Slc30a5_j2    | 2.66959   | 2.21268               | 0         | 1         | 1         |
| Pik3r1        | 12.2543   | 10.3086               | 0         | 1         | 1         |
| XLOC_008740   | 0.221575  | 0.113045              | -0.970897 | 0.332921  | 0.674018  |
| Srsf12_j1     | 0.57221   | 0.420713              | 0         | 1         | 1         |
| Erbp2ip       | 0.130869  | 0.0395471             | 0         | 1         | 1         |
| 2410002O22Rik | 0.550564  | 0                     | 0         | 1         | 1         |
| Ppwd1_j1      | 1.11693   | 1.21016               | 0         | 1         | 1         |
| Rgs7bp_j2     | 25.0195   | 10.9021               | 0         | 1         | 1         |
| Rnf180_j3     | 0.16823   | 0.0761897             | 0         | 1         | 1         |
| Gppb1_j6      | 3.52239   | 5.00794               | 0         | 1         | 1         |
| Map3k1        | 0.578177  | 0.406048              | 0         | 1         | 1         |
| Il31ra_j3     | 0.165612  | 0.102411              | 0         | 1         | 1         |
| Il31ra        | 0.123899  | 0.033581              | 0         | 1         | 1         |
| Skiv2l2_j3    | 7.52176   | 6.424                 | 0         | 1         | 1         |
| Snx18_j3      | 6.06612   | 5.32435               | 0         | 1         | 1         |
| Itga2_j1      | 0.0786034 | 0.100914              | 0.360456  | 0.555522  | 1         |
| Isl1_j4       | 0.324788  | 0.587294              | 0         | 1         | 1         |
| Parp8_j3      | 0.168801  | 0 -1.79769e+308       |           | 2.75E-09  | 2.12E-07  |
| Parp8_j2      | 0.166867  | 0.174636              | 0.0656584 | 0.876915  | 0.96086   |
| Parp8_j9      | 0.767789  | 0.314372              | -1.28824  | 0.0203161 | 0.142415  |
| Mrps30_j2     | 10.8967   | 11.1229               | 0.029639  | 0.890188  | 0.965178  |
| Gdi2_j2       | 22.2173   | 29.836                | 0         | 1         | 1         |
| Asb13_j3      | 11.768    | 8.16868               | 0         | 1         | 1         |
| Akr1c14_j1    | 0         | 0.200168 1.79769e+308 |           | 0.0031158 | 0.0354993 |
| Akr1c13_j1    | 0         | 0.090797 1.79769e+308 |           | 0.12315   | 1         |
| XLOC_008066   | 0         | 0.137845 1.79769e+308 |           | 0.0601211 | 1         |
| Heatr1_j1     | 2.04257   | 2.27268               | 0         | 1         | 1         |
| Lyst_j4       | 0         | 0.0506821             | 0         | 1         | 1         |
| Arid4b_j3     | 1.63968   | 2.1118                | 0         | 1         | 1         |
| Vps41_j5      | 1.33654   | 0.691608              | 0         | 1         | 1         |
| Vps41_j8      | 0.711481  | 0.749073              | 0         | 1         | 1         |

|                  |             |                        |            |           |           |
|------------------|-------------|------------------------|------------|-----------|-----------|
| Sfrp4_j1         | 2.19292     | 3.19006                | 0.54073    | 0.0479965 | 0.251853  |
| Aoah_j4          | 0           | 0.0490751 1.79769e+308 |            | 0.123582  | 1         |
| Fam65b_j2        | 0           | 0.126732 1.79769e+308  |            | 0.0553167 | 1         |
| Fam65b_j4        | 0           | 0.0864453 1.79769e+308 |            | 0.115681  | 1         |
| TTRAP            | 1.46324     | 2.03287                | 0.474355   | 0.0962591 | 0.383094  |
| AK020728_j3      | 0.948645    | 1.50436                | 0          | 1         | 1         |
| AK020728_j7      | 0.0507635   | 0.0473253              | 0          | 1         | 1         |
| Mboat1_j2        | 0           | 0.179907 1.79769e+308  |            | 0.0025143 | 0.0299872 |
| XLOC_008129      | 0.0312581   | 0.174422               | 2.48028    | 0.0628798 | 0.296948  |
| Prpf4b_j4        | 0.100788    | 0.13582                | 0          | 1         | 1         |
| XLOC_008139      | 0.136259    | 0.192347               | 0.497357   | 0.50487   | 0.787934  |
| XLOC_008140      | 0.158781    | 0.206039               | 0.375879   | 0.77218   | 0.922655  |
| Rreb1_j3         | 0.0863476   | 0.137929               | 0.675696   | 0.575773  | 1         |
| Sirt5_j2         | 0.296449    | 0.391791               | 0.402301   | 0.627032  | 0.854469  |
| Rnf182_j1        | 0.0431671   | 0.207952               | 2.26824    | 0.0103353 | 0.0876488 |
| Rnf182_j2        | 0.000187143 | 0.814849               | 12.0882    | 0.718541  | 0.898689  |
| Bicd2_j4         | 1.93764     | 2.36027                | 0.284654   | 0.0957079 | 0.38193   |
| Omd              | 0.14507     | 0.23905                | 0.72057    | 0.179541  | 0.519188  |
| Nol8_j3          | 0.838138    | 1.44531                | 0          | 1         | 1         |
| Iars_j3          | 28.5273     | 27.8534                | -0.0344864 | 0.817809  | 0.940908  |
| S1pr3_j2         | 2.91204     | 3.27226                | 0          | 1         | 1         |
| Cks2_j1          | 0.109414    | 0.225208               | 1.04146    | 0.23109   | 0.578128  |
| XLOC_008204      | 0.052821    | 0.164444               | 1.63842    | 0.0552078 | 0.274204  |
| Sykb_j4          | 0.025832    | 0.192449               | 2.89724    | 0.0024291 | 0.0291764 |
| AK030238_j2      | 0.132915    | 0.13671                | 0.0406111  | 0.972525  | 1         |
| Hrh2             | 0           | 0.129213 1.79769e+308  |            | 0.0112464 | 1         |
| XLOC_008209      | 0.0204764   | 0.056794               | 1.47178    | 0.233062  | 1         |
| 4732471D19Rik    | 1.25555     | 1.38563                | 0          | 1         | 1         |
| XLOC_008214      | 0           | 0.0546204 1.79769e+308 |            | 0.106152  | 1         |
| Tspan17_j5       | 4.66716     | 4.75395                | 0.0265789  | 0.92137   | 0.975363  |
| Zfp346_j5        | 0.614939    | 1.63644                | 0          | 1         | 1         |
| Nsd1_j4          | 6.33889     | 6.49276                | 0.0346019  | 0.704769  | 0.892134  |
| Tmed9            | 11.9695     | 13.8611                | 0.211676   | 0.184326  | 0.524843  |
| B4galt7_j1       | 1.09978     | 1.51634                | 0          | 1         | 1         |
| AK043531_j1      | 0.268242    | 0.394032               | 0          | 1         | 1         |
| Tgfbj1           | 0.00448282  | 0.730404               | 0          | 1         | 1         |
| AK015814_j2      | 0           | 0.0886812 1.79769e+308 |            | 0.15384   | 1         |
| AK015814_j7      | 0           | 0.0688554 1.79769e+308 |            | 0.11875   | 1         |
| XLOC_008243      | 0.0446165   | 0.0798795              | 0.840248   | 0.369141  | 1         |
| XLOC_008247      | 2.31276     | 1.71429                | -0.432008  | 0.406453  | 0.727764  |
| Gm16133_j5       | 0.0275549   | 0.200014               | 2.85972    | 0.156596  | 0.49018   |
| 0610007P08Rik_j6 | 0.568287    | 0.884004               | 0          | 1         | 1         |
| Zfp369_j2        | 0           | 0.0787811 1.79769e+308 |            | 0.0012567 | 1         |
| Zfp369           | 0.382315    | 0.465318               | 0.283456   | 0.287889  | 0.635869  |
| Zfp369_j3        | 0.113925    | 0.110975               | -0.037848  | 0.939721  | 1         |
| Zfp759_j1        | 0.660397    | 0.980087               | 0.569577   | 0.0129507 | 0.103778  |
| Zfp455_j1        | 0.0950634   | 0.148344               | 0.641987   | 0.44854   | 1         |

|                  |           |           |              |           |           |
|------------------|-----------|-----------|--------------|-----------|-----------|
| Zfp455_j2        | 0         | 0.0501    | 1.79769e+308 | 0.0843168 | 1         |
| Zfp455           | 0.442467  | 0.271393  | -0.705186    | 0.10775   | 0.407985  |
| BC100427_j3      | 0.011888  | 0.448252  | 5.23673      | 0.290747  | 0.638092  |
| BC100427_j1      | 0.112825  | 0.200603  | 0.830251     | 0.482011  | 0.775384  |
| BC100427_j4      | 0.251136  | 0.209339  | -0.262626    | 0.782226  | 0.926386  |
| XLOC_008276      | 0.0685565 | 0.0632854 | -0.115422    | 0.933941  | 1         |
| XLOC_008276      | 0         | 0.0905065 | 1.79769e+308 | 0.061762  | 1         |
| Slc9a3_j4        | 1.28E-05  | 0.0846936 | 12.6921      | 0.979119  | 1         |
| XLOC_008292      | 2.01276   | 1.56874   | -0.359569    | 0.0816027 | 0.347964  |
| XLOC_008292      | 1.90042   | 2.39927   | 0.336276     | 0.0849527 | 0.355671  |
| Ttc37_j1         | 0         | 0.0758668 | 0            | 1         | 1         |
| 2210408I21Rik    | 0.175775  | 0.468583  | 0            | 1         | 1         |
| Mef2c_j5         | 0.986667  | 1.40181   | 0            | 1         | 1         |
| Mef2c_j8         | 0.332959  | 0.197271  | 0            | 1         | 1         |
| Tmem161b_j5      | 0.884269  | 0.709631  | 0            | 1         | 1         |
| Tmem161b_j6      | 0.689651  | 1.16583   | 0            | 1         | 1         |
| Edil3_j1         | 0.187135  | 1.31575   | 0            | 1         | 1         |
| Ankrd34b_j1      | 0         | 0.0533521 | 1.79769e+308 | 0.0811743 | 1         |
| XLOC_008345      | 0.0749084 | 0.243158  | 1.6987       | 0.0361944 | 0.210104  |
| XLOC_008350      | 0.132063  | 0.136125  | 0.0437067    | 0.945113  | 1         |
| Zfp366_j1        | 0         | 0.069957  | 1.79769e+308 | 0.0288363 | 1         |
| Zfp366_j2        | 0.0304451 | 0.298483  | 3.29336      | 3.21E-05  | 0.0008183 |
| XLOC_008354      | 0.0910681 | 0.110577  | 0.28004      | 0.770202  | 1         |
| XLOC_008354      | 0         | 0.0611293 | 1.79769e+308 | 0.124549  | 1         |
| Taf9_j2          | 2.87669   | 3.54107   | 0            | 1         | 1         |
| Cd180            | 0.171128  | 0.213224  | 0.317296     | 0.510958  | 0.79135   |
| Cd180_j2         | 0.0826322 | 0.189364  | 1.19639      | 0.0727362 | 0.324527  |
| Dimt1_j2         | 0         | 0.196467  | 0            | 1         | 1         |
| Dimt1_j3         | 0         | 0.0665188 | 0            | 1         | 1         |
| 3830408C21Rik_j2 | 3.92E-05  | 0.0974531 | 11.2794      | 0.952189  | 1         |
| Ercc8_j1         | 0.884701  | 0.791307  | -0.160951    | 0.610825  | 0.846628  |
| XLOC_008373      | 0.0960588 | 0.110971  | 0            | 1         | 1         |
| Elovl7           | 10.1029   | 7.97242   | 0            | 1         | 1         |
| Mier3_j3         | 0         | 0.125896  | 0            | 1         | 1         |
| Il6st_j4         | 7.68856   | 14.9866   | 0            | 1         | 1         |
| XLOC_008392      | 0.0360505 | 0.0543554 | 0.592406     | 0.689749  | 1         |
| XLOC_008400      | 0         | 0.1108    | 1.79769e+308 | 0.0361407 | 1         |
| Emb_j3           | 18.0488   | 19.0029   | 0.0743158    | 0.628894  | 0.855705  |
| Hcn1_j3          | 0.139345  | 0.288539  | 1.05011      | 0.317139  | 0.66048   |
| Akr1e1_j1        | 0.133642  | 0.101006  | -0.403933    | 0.392804  | 1         |
| Wdr37_j2         | 1.80137   | 1.33803   | 0            | 1         | 1         |
| Gtpbp4_j4        | 0         | 0.88389   | 1.79769e+308 | 7.11E-06  | 0.0002306 |
| Ryr2_j4          | 1.95724   | 1.41944   | -0.463497    | 0.0062648 | 0.0606068 |
| Ryr2_j8          | 0.213738  | 0.45647   | 1.09468      | 1.06E-06  | 4.35E-05  |
| Mtr_j1           | 6.35E-05  | 0.0571611 | 9.815        | 0.788216  | 1         |
| Actn2_j3         | 0.0359209 | 0.0991286 | 1.46448      | 0.127514  | 1         |
| Actn2_j9         | 0         | 0.0506879 | 1.79769e+308 | 0.1142    | 1         |

|                  |           |           |              |           |           |
|------------------|-----------|-----------|--------------|-----------|-----------|
| Lgals8_j4        | 16.0914   | 24.4044   | 0            | 1         | 1         |
| Gpr137b          | 0.520916  | 1.55359   | 0            | 1         | 1         |
| Ggps1            | 9.45937   | 9.3018    | 0            | 1         | 1         |
| Hecw1_j2         | 14.6541   | 11.1296   | 0            | 1         | 1         |
| Cdk13_j3         | 2.67039   | 2.60916   | -0.0334666   | 0.886934  | 0.964085  |
| Cdk13_j4         | 2.08689   | 2.33737   | 0.163528     | 0.389403  | 0.71658   |
| Pou6f2_j1        | 0         | 0.0473988 | 1.79769e+308 | 0.0751232 | 1         |
| Stard3nl         | 4.93102   | 8.87689   | 0.848167     | 0.0006873 | 0.0105683 |
| Zfp187_j3        | 0.567429  | 0.651838  | 0            | 1         | 1         |
| Zfp187_j4        | 0.569368  | 0.837904  | 0            | 1         | 1         |
| Zfp322a_j2       | 0.654513  | 0.982846  | 0            | 1         | 1         |
| Lrrc16a_j8       | 0.326745  | 0.279385  | -0.22591     | 0.554878  | 0.817853  |
| Nrsn1_j2         | 14.3644   | 16.321    | 0            | 1         | 1         |
| XLOC_008472      | 0.600756  | 0.588498  | -0.0297418   | 0.915634  | 0.973691  |
| BC025054_j1      | 0         | 0.170729  | 1.79769e+308 | 0.0045343 | 0.0471812 |
| BC025054_j2      | 0.061624  | 0.126979  | 1.04303      | 0.127045  | 1         |
| BC025054_j3      | 0.127766  | 0.21494   | 0.75043      | 0.0823108 | 0.349548  |
| Exoc2_j1         | 6.70839   | 6.76196   | 0            | 1         | 1         |
| AK090209_j1      | 0.100336  | 0.143128  | 0.512467     | 0.671253  | 1         |
| AK090209_j2      | 0         | 0.16284   | 1.79769e+308 | 0.0715648 | 0.321704  |
| Gmds_j2          | 2.9661    | 2.2449    | -0.401913    | 0.308512  | 0.653459  |
| Serpinb6a_j2     | 4.50761   | 5.87833   | 0            | 1         | 1         |
| Tubb2a_j1        | 179.723   | 133.195   | 0            | 1         | 1         |
| Rpp40_j1         | 2.86594   | 2.70487   | -0.0834492   | 0.758759  | 0.917041  |
| Lymr4_j1         | 28.5655   | 27.0985   | -0.0760587   | 0.630533  | 0.85633   |
| Ssr1_j2          | 5.71753   | 6.64811   | 0.217554     | 0.0354516 | 0.207411  |
| Slc35b3_j5       | 0         | 0.172701  | 1.79769e+308 | 0.0415525 | 0.229767  |
| Tcfap2a_j4       | 0.28299   | 0.320847  | 0.181135     | 0.685458  | 0.882655  |
| Gfod1_j2         | 0.210213  | 2.44446   | 0            | 1         | 1         |
| Ranbp9_j2        | 0.344199  | 1.98441   | 0            | 1         | 1         |
| Ccdc90a_j1       | 0.0518726 | 0.0866474 | 0.740184     | 0.397318  | 1         |
| XLOC_008518      | 0.0931668 | 0.41108   | 2.14153      | 0.0472769 | 0.249594  |
| Atxn1_j1         | 0.466447  | 0.394639  | -0.241179    | 0.380591  | 0.711466  |
| Atxn1_j2         | 0.158821  | 0.139572  | -0.186392    | 0.681809  | 0.880565  |
| Kif13a_j5        | 0.0571336 | 0.201017  | 0            | 1         | 1         |
| Tpmt_j2          | 1.0451    | 1.66865   | 0.675049     | 0.0198502 | 0.140074  |
| Ptpdc1_j1        | 1.32245   | 3.30422   | 0            | 1         | 1         |
| Fam120a_j3       | 19.3598   | 19.3436   | -0.00120752  | 0.991581  | 0.997559  |
| Wnk2_j6          | 0         | 0.0868386 | 0            | 1         | 1         |
| Wnk2_j7          | 0.57834   | 0.416665  | 0            | 1         | 1         |
| Susd3_j1         | 0.0511787 | 0.225099  | 2.13695      | 0.106112  | 0.404436  |
| Cenpp_j1         | 0.103593  | 0.139634  | 0.430727     | 0.70626   | 1         |
| Shc3_j4          | 0         | 0.101819  | 0            | 1         | 1         |
| Sema4d_j3        | 0.234499  | 0.46114   | 0            | 1         | 1         |
| Sema4d_j4        | 1.09839   | 1.30819   | 0            | 1         | 1         |
| Nfil3_j1         | 0.269434  | 0.645932  | 0            | 1         | 1         |
| 4833439L19Rik_j2 | 0.616034  | 0.300839  | 0            | 1         | 1         |

|                  |             |                        |            |           |           |
|------------------|-------------|------------------------|------------|-----------|-----------|
| 4833439L19Rik_j7 | 0.36301     | 2.42702                | 0          | 1         | 1         |
| Cltb_j2          | 36.8829     | 49.1                   | 0          | 1         | 1         |
| Rnf44_j8         | 0.258288    | 0.22402                | 0          | 1         | 1         |
| Rnf44_j9         | 2.71181     | 5.30273                | 0          | 1         | 1         |
| Sncb_j3          | 0           | 0.376783 1.79769e+308  | 0.0021072  | 0.0260416 |           |
| Hk3_j5           | 0           | 0.0850157              | 0          | 1         | 1         |
| Uimc1_j4         | 0.827039    | 1.56473                | 0.919883   | 0.0223343 | 0.152214  |
| Pdlim7_j5        | 1.72927     | 0 -1.79769e+308        | 3.69E-34   | 1.26E-31  |           |
| Pdlim7_j10       | 0.323558    | 0.312928               | -0.0481921 | 0.954994  | 0.987081  |
| Ddx41_j3         | 0.0614698   | 0.106111               | 0          | 1         | 1         |
| Fam193b_j3       | 2.13774     | 2.5208                 | 0          | 1         | 1         |
| Fam193b_j6       | 0           | 0.183288               | 0          | 1         | 1         |
| XLOC_008578      | 0.0101876   | 0.147113               | 3.85204    | 0.256944  | 1         |
| Spock1_j6        | 5.78688     | 5.18943                | 0          | 1         | 1         |
| Klhl3_j9         | 0.0343576   | 0.119497               | 1.79827    | 0.0158018 | 1         |
| XLOC_008582      | 0.720068    | 0.584115               | -0.30188   | 0.299578  | 0.646333  |
| Ubqln1_j1        | 0.180181    | 0.175445               | 0          | 1         | 1         |
| Gkap1_j8         | 0.557681    | 0.60534                | 0.118304   | 0.792431  | 0.930853  |
| Kif27_j1         | 0.000660792 | 0.17433                | 8.04341    | 0.625372  | 0.853869  |
| Hnrnpk_j5        | 0.543251    | 0.887365               | 0          | 1         | 1         |
| Agtpbp1_j4       | 0.465044    | 1.17087                | 1.33214    | 8.97E-06  | 0.0002831 |
| Zcchc6_j4        | 0.115646    | 0.128595               | 0          | 1         | 1         |
| XLOC_008599      | 0.579254    | 0.315862               | -0.874903  | 0.101432  | 0.394501  |
| Zfp934_j1        | 0           | 0.671566               | 0          | 1         | 1         |
| 6720489N17Rik_j1 | 0.148228    | 0.118969               | 0          | 1         | 1         |
| XLOC_008604      | 0.142631    | 0.170459               | 0          | 1         | 1         |
| XLOC_008604      | 0.208479    | 0.142911               | 0          | 1         | 1         |
| AK139826_j1      | 0.117079    | 0.106067               | 0          | 1         | 1         |
| AK139826_j2      | 0.1856      | 0.212864               | 0          | 1         | 1         |
| Fancc_j1         | 0.20847     | 0.184067               | -0.179607  | 0.800593  | 0.93355   |
| Fancc_j2         | 0.148619    | 0.38181                | 1.36124    | 0.0294107 | 0.183244  |
| Fancc            | 0.281164    | 0.514588               | 0.872005   | 0.068349  | 0.313025  |
| Ptch1_j5         | 0.699624    | 0.486276               | 0          | 1         | 1         |
| Slc35d2_j7       | 0.0984679   | 0.384884               | 1.9667     | 0.0041455 | 0.044054  |
| Cdc14b_j3        | 1.47086     | 1.6087                 | 0          | 1         | 1         |
| Hiatl1_j1        | 3.07548     | 3.0977                 | 0.010383   | 0.963752  | 0.989792  |
| Zfp712_j3        | 0           | 0.0777218 1.79769e+308 | 0.0207142  |           | 1         |
| Zfp708_j5        | 0.101006    | 0.0969043              | -0.059814  | 0.929123  | 1         |
| Zfp458_j4        | 0.17265     | 0 -1.79769e+308        | 2.02E-05   | 0.0005581 |           |
| Zfp458_j3        | 0           | 0.0969438 1.79769e+308 | 0.0139552  |           | 1         |
| Zfp953           | 0.232316    | 0.26435                | 0.186359   | 0.783662  | 0.9271    |
| Rsl1_j3          | 0.447765    | 0.32832                | -0.447639  | 0.375721  | 0.707996  |
| Rsl1_j4          | 0           | 0.177375 1.79769e+308  | 0.0204965  | 0.143276  |           |
| Zfp58_j1         | 0.110673    | 0.583748               | 2.39905    | 0.0002821 | 0.005083  |
| Zfp58_j2         | 0           | 0.172489 1.79769e+308  | 0.0091245  | 0.0800631 |           |
| Adcy2_j1         | 0           | 0.111795               | 0          | 1         | 1         |
| Srd5a1_j1        | 2.77628     | 3.26175                | 0          | 1         | 1         |

|             |             |           |               |           |           |
|-------------|-------------|-----------|---------------|-----------|-----------|
| Srd5a1      | 3.05107     | 2.79161   | 0             | 1         | 1         |
| BC018507_j4 | 0.150891    | 0.959938  | 0             | 1         | 1         |
| Adamts16_j5 | 0.0342849   | 0.0553852 | 0.691929      | 0.593141  | 1         |
| Adamts16_j8 | 0.110218    | 0.134587  | 0.288182      | 0.640154  | 1         |
| Ndufs6_j1   | 18.3044     | 20.1316   | 0.13727       | 0.249449  | 0.596861  |
| Trip13_j2   | 0.0629715   | 0.113167  | 0.845683      | 0.512155  | 1         |
| Trip13_j4   | 0.17563     | 0.170669  | -0.0413359    | 0.961473  | 0.989105  |
| Cep72_j3    | 0           | 0.0953363 | 1.79769e+308  | 0.0577854 | 1         |
| Ahrr_j2     | 0.00968135  | 0.092361  | 3.254         | 0.0366058 | 1         |
| Sdha_j2     | 0.394926    | 1.86001   | 0             | 1         | 1         |
| Cast_j7     | 0.292035    | 1.39731   | 0             | 1         | 1         |
| Arsk_j1     | 0           | 0.217647  | 1.79769e+308  | 0.0151841 | 0.115936  |
| Ankrd32_j2  | 0.000451851 | 0.0849913 | 0             | 1         | 1         |
| AK053270    | 0.140694    | 0.122959  | -0.194384     | 0.860182  | 0.95576   |
| Rasa1_j5    | 1.43415     | 0.400319  | 0             | 1         | 1         |
| Msh3_j1     | 1.2504      | 1.24023   | 0             | 1         | 1         |
| Msh3_j4     | 1.73716     | 1.72649   | 0             | 1         | 1         |
| Papd4_j6    | 0.40977     | 0.485764  | 0.245441      | 0.714209  | 0.896527  |
| Pde8b_j3    | 1.14331     | 0.610898  | 0             | 1         | 1         |
| Pde8b_j2    | 1.25316     | 1.37555   | 0             | 1         | 1         |
| Sv2c_j5     | 0           | 0.312761  | 0             | 1         | 1         |
| Nsa2_j3     | 0.630745    | 0.577906  | 0             | 1         | 1         |
| Hexb_j1     | 39.3346     | 41.1088   | 0             | 1         | 1         |
| Rgnesf_j3   | 3.18395     | 3.69185   | 0.213527      | 0.234799  | 0.582023  |
| Rgnesf_j4   | 0.0683564   | 0         | -1.79769e+308 | 0.0008518 | 1         |
| Rgnesf_j5   | 0.896321    | 0.931755  | 0.0559354     | 0.824742  | 0.943424  |
| Rgnesf_j6   | 1.47621     | 1.57197   | 0.0906762     | 0.621023  | 0.851431  |
| Btf3_j4     | 0.642338    | 1.30945   | 1.02755       | 0.118273  | 0.428203  |
| Ptcd2_j3    | 0           | 0.482749  | 0             | 1         | 1         |
| Cartpt_j3   | 0           | 0.0791274 | 1.79769e+308  | 0.143967  | 1         |
| Mccc2_j2    | 0.336272    | 0.83993   | 1.32064       | 0.0062629 | 0.0606004 |
| Bdp1        | 0.378606    | 0.388658  | 0.0378033     | 0.88433   | 0.963396  |
| Marveld2    | 0.378917    | 0.391157  | 0.0458648     | 0.906153  | 0.97031   |
| Rad17_j2    | 0.240835    | 0.645337  | 0             | 1         | 1         |
| Rad17_j1    | 2.75357     | 0.391974  | 0             | 1         | 1         |
| Slc30a5_j3  | 5.18085     | 3.52519   | 0             | 1         | 1         |
| Pik3r1_j1   | 11.5077     | 15.0968   | 0             | 1         | 1         |
| Pik3r1      | 4.14034     | 4.11865   | 0             | 1         | 1         |
| Mast4_j2    | 0.0635613   | 0.0840574 | 0             | 1         | 1         |
| ErbB2ip_j4  | 0           | 0.123034  | 0             | 1         | 1         |
| ErbB2ip_j5  | 0           | 0.0617072 | 0             | 1         | 1         |
| Cwc27_j1    | 2.11017     | 3.02131   | 0.517814      | 0.0778515 | 0.337832  |
| Rgs7bp_j5   | 0           | 2.0962    | 0             | 1         | 1         |
| Rgs7bp_j8   | 39.0447     | 33.101    | 0             | 1         | 1         |
| Rnf180_j5   | 1.50731     | 1.31252   | 0             | 1         | 1         |
| Kif2a_j4    | 7.55254     | 9.28116   | 0             | 1         | 1         |
| Ndufaf2     | 17.9939     | 15.4771   | -0.21737      | 0.108146  | 0.408811  |



|                  |            |            |              |           |           |
|------------------|------------|------------|--------------|-----------|-----------|
| Rab3c            | 9.2342     | 10.991     | 0            | 1         | 1         |
| Gppb1_j3         | 6.54918    | 6.18757    | 0            | 1         | 1         |
| Map3k1_j1        | 0.346824   | 0.548796   | 0            | 1         | 1         |
| Map3k1_j2        | 0.237721   | 0.128941   | 0            | 1         | 1         |
| Itga1_j2         | 0.163692   | 0.116347   | -0.49255     | 0.498786  | 0.78413   |
| Parp8_j8         | 1.18107    | 1.30184    | 0.140457     | 0.634512  | 0.858242  |
| XLOC_008059      | 0.859003   | 0.876307   | 0.0287728    | 0.95867   | 0.988071  |
| Asb13_j2         | 0.386881   | 0.487365   | 0            | 1         | 1         |
| Heatr1_j2        | 0.211233   | 0.00226649 | 0            | 1         | 1         |
| Heatr1_j3        | 0          | 0.0935913  | 0            | 1         | 1         |
| Ero1lb_j2        | 0.0674492  | 0.0758188  | 0            | 1         | 1         |
| Lyst_j1          | 0.811095   | 0.764969   | 0            | 1         | 1         |
| Psm2_j1          | 0.397413   | 0.353587   | -0.168574    | 0.572056  | 0.827134  |
| Psm2_j5          | 0.407462   | 0.131351   | -1.63323     | 0.314012  | 0.658298  |
| 2810021B07Rik_j2 | 1.07146    | 1.6693     | 0.639664     | 0.128215  | 0.44626   |
| XLOC_008087      | 0.0729453  | 0.132801   | 0.86438      | 0.48029   | 1         |
| Amph_j2          | 2.26053    | 1.85913    | -0.282036    | 0.29593   | 0.642657  |
| Elmo1_j5         | 2.58676    | 2.8424     | 0.135962     | 0.542289  | 0.810117  |
| Aoah             | 0.0369484  | 0.158643   | 2.1022       | 0.0330043 | 0.197926  |
| Zscan12          | 1.51998    | 1.57663    | 0.0527924    | 0.815153  | 0.9398    |
| D130043K22Rik_j3 | 4.40451    | 3.08595    | 0            | 1         | 1         |
| XLOC_008119      | 0.18779    | 0.0840257  | 0            | 1         | 1         |
| AK020728_j6      | 0.498704   | 0.447534   | 0            | 1         | 1         |
| XLOC_008128      | 0.0251575  | 0.273797   | 3.44405      | 0.0200075 | 0.140868  |
| XLOC_008128      | 0.0697036  | 0.276024   | 1.98549      | 0.0843839 | 0.354539  |
| XLOC_008128      | 0          | 0.132932   | 1.79769e+308 | 0.118216  | 1         |
| Wrnip1_j1        | 19.0798    | 25.1342    | 0.397606     | 0.0014983 | 0.0197253 |
| Serpinb9_j2      | 0.153867   | 0.73442    | 2.25492      | 4.79E-05  | 0.0011513 |
| Bphl_j1          | 11.6056    | 14.3438    | 0            | 1         | 1         |
| Prpf4b_j5        | 0.678959   | 1.18105    | 0            | 1         | 1         |
| XLOC_008151      | 0.160884   | 0.233788   | 0.539177     | 0.357414  | 0.693302  |
| Pak1ip1_j5       | 5.07032    | 6.64614    | 0            | 1         | 1         |
| Hivep1_j3        | 1.19457    | 0.429497   | -1.47577     | 2.30E-09  | 1.81E-07  |
| Hivep1_j5        | 0.0940922  | 0.0371939  | -1.33901     | 0.0733775 | 1         |
| Edn1             | 0.0882792  | 0.202397   | 1.19704      | 0.064327  | 0.301189  |
| XLOC_008186      | 0.659804   | 0.924919   | 0.48729      | 0.204713  | 0.548976  |
| Bicd2_j3         | 0.916145   | 1.92716    | 1.07283      | 1.32E-07  | 6.86E-06  |
| S1pr3_j3         | 19.2423    | 24.3725    | 0            | 1         | 1         |
| Sykb_j2          | 0          | 0.128586   | 1.79769e+308 | 0.0458574 | 1         |
| Tspan17_j2       | 2.35495    | 4.21307    | 0.839176     | 0.0020203 | 0.0251843 |
| Tspan17_j8       | 54.6152    | 82.8848    | 0.601804     | 1.11E-08  | 7.70E-07  |
| Unc5a            | 0.785424   | 0.823277   | 0            | 1         | 1         |
| Zfp346_j3        | 0.00927871 | 0.340592   | 0            | 1         | 1         |
| Prelid1_j1       | 49.4634    | 55.0855    | 0.155313     | 0.172499  | 0.510021  |
| Tmed9_j2         | 0          | 0.875089   | 1.79769e+308 | 0.0002188 | 0.004127  |
| B4galt7          | 1.09871    | 0.987858   | 0            | 1         | 1         |
| AK043531_j2      | 0.681179   | 0.711127   | 0            | 1         | 1         |

|                   |             |           |              |           |           |
|-------------------|-------------|-----------|--------------|-----------|-----------|
| Smad5_j1          | 0.000915713 | 0.103027  | 0            | 1         | 1         |
| 5133401N09Rik_j1  | 8.12634     | 7.4997    | -0.115774    | 0.639367  | 0.860441  |
| Ntrk2_j1          | 6.51446     | 8.36149   | 0            | 1         | 1         |
| Ntrk2_j2          | 5.81332     | 3.67278   | 0            | 1         | 1         |
| Ntrk2_j5          | 0.694137    | 0.942716  | 0            | 1         | 1         |
| Naa35_j2          | 13.8658     | 16.3757   | 0.240025     | 0.0706408 | 0.319497  |
| Dapk1_j3          | 3.6754      | 3.34982   | 0            | 1         | 1         |
| 2010111I01Rik_j1  | 16.0741     | 19.3437   | 0            | 1         | 1         |
| XLOC_008255       | 0.147347    | 0.136914  | 0            | 1         | 1         |
| 0610007P08Rik_j8  | 0.749843    | 0.561505  | 0            | 1         | 1         |
| Habp4_j1          | 1.10974     | 1.38579   | 0.320495     | 0.462818  | 0.763401  |
| AK002708_j2       | 0.0167805   | 0.117919  | 0            | 1         | 1         |
| Zfp369_j7         | 0.0976476   | 0.144705  | 0.567463     | 0.260005  | 1         |
| Zfp493_j1         | 0.0734265   | 0.0346914 | -1.08172     | 0.605338  | 1         |
| Zfp273_j2         | 0.160707    | 0.422219  | 1.39356      | 0.0110037 | 0.0919408 |
| Med10_j2          | 18.8689     | 23.4934   | 0.316247     | 0.0328856 | 0.197493  |
| Slc9a3_j3         | 0           | 0.0985253 | 1.79769e+308 | 0.0041718 | 1         |
| Slc9a3_j2         | 0.0733767   | 0.104863  | 0.515113     | 0.460091  | 1         |
| Eil2_j2           | 3.6009      | 5.25013   | 0            | 1         | 1         |
| Mctp1_j1          | 0.421287    | 0.35113   | -0.262798    | 0.379358  | 0.710836  |
| Mctp1_j6          | 0.668337    | 0.866154  | 0.374048     | 0.155685  | 0.488975  |
| Fam172a_j1        | 0.470516    | 0.37077   | 0            | 1         | 1         |
| Fam172a_j4        | 0           | 0.308982  | 0            | 1         | 1         |
| Mblac2_j1         | 4.11207     | 3.22369   | 0            | 1         | 1         |
| Cetn3_j1          | 0.105964    | 0.12851   | 0.278307     | 0.850137  | 1         |
| Ccnh_j1           | 6.66939     | 5.60803   | 0            | 1         | 1         |
| Ssbp2_j8          | 0           | 0.211971  | 1.79769e+308 | 0.0337317 | 0.200869  |
| Homer1_j1         | 1.11941     | 1.16171   | 0.0535049    | 0.829843  | 0.944999  |
| Lhfp12_j4         | 0.946942    | 1.06174   | 0            | 1         | 1         |
| Ap3b1_j3          | 1.32696     | 1.29209   | -0.0384077   | 0.874406  | 0.960101  |
| Ap3b1_j2          | 0.392422    | 0.975865  | 1.31427      | 7.54E-05  | 0.0016839 |
| Ap3b1_j5          | 0.569159    | 0.631798  | 0.150631     | 0.67592   | 0.878059  |
| Tbca_j3           | 3.00899     | 5.12863   | 0            | 1         | 1         |
| Tbca_j5           | 30.9666     | 32.9128   | 0            | 1         | 1         |
| Wdr41_j1          | 1.04595     | 0.510478  | 0            | 1         | 1         |
| Wdr41_j3          | 3.64132     | 2.89335   | 0            | 1         | 1         |
| Zbed3_j2          | 1.92706     | 1.97846   | 0.037973     | 0.877029  | 0.96086   |
| Gcnt4_j1          | 0.0133081   | 0.29467   | 4.46873      | 0.0001776 | 0.0034783 |
| Gfm2_j2           | 0.287484    | 0.27869   | 0            | 1         | 1         |
| Gm9828_j2         | 0           | 0.148991  | 1.79769e+308 | 0.0071273 | 1         |
| Gm9828_j1         | 0.0899223   | 0.0944892 | 0.07147      | 0.953707  | 1         |
| XLOC_008350       | 0.0904713   | 0.100159  | 0.146761     | 0.866446  | 1         |
| Mrps27_j1         | 1.38592     | 1.42334   | 0            | 1         | 1         |
| Taf9_j1           | 22.1632     | 25.727    | 0            | 1         | 1         |
| 3830408C21Rik_j12 | 0.188912    | 0.391298  | 1.05056      | 0.261668  | 0.610795  |
| Ercc8             | 1.69994     | 1.46209   | -0.217457    | 0.349909  | 0.687511  |
| XLOC_008373       | 0.0326821   | 0.114648  | 0            | 1         | 1         |

|                  |             |           |              |           |          |
|------------------|-------------|-----------|--------------|-----------|----------|
| Elovl7           | 1.09018     | 0.860332  | 0            | 1         | 1        |
| Pde4d_j1         | 0.0832031   | 0.116422  | 0.484659     | 0.703528  | 1        |
| Mier3_j5         | 0.841887    | 0.728157  | 0            | 1         | 1        |
| Il6st_j3         | 0.367336    | 0.303466  | 0            | 1         | 1        |
| Ppap2a_j1        | 11.8068     | 9.98899   | 0            | 1         | 1        |
| BC016423_j3      | 57.4423     | 57.0761   | 0            | 1         | 1        |
| Net1_j2          | 0.210583    | 0.389434  | 0.886992     | 0.0405526 | 0.22589  |
| Zmynd11_j4       | 0.15844     | 0.94969   | 0            | 1         | 1        |
| Chrm3_j1         | 0.0327593   | 0.301773  | 3.20349      | 1         | 1        |
| Ryr2_j11         | 0           | 0.0781195 | 1.79769e+308 | 1.99E-05  | 1        |
| Mtr_j2           | 2.68533     | 2.9523    | 0.136744     | 0.336958  | 0.677294 |
| Lgals8_j1        | 7.90977     | 2.53358   | 0            | 1         | 1        |
| Hecw1_j5         | 0.313325    | 0.185573  | 0            | 1         | 1        |
| 5033411D12Rik_j1 | 0.265825    | 0.405522  | 0.609305     | 0.330676  | 0.672484 |
| 5033411D12Rik_j2 | 0.0879151   | 0.112782  | 0.359349     | 0.600453  | 1        |
| 5033411D12Rik_j5 | 0.000822903 | 0.0579003 | 6.1367       | 0.317896  | 1        |
| AK038969_j2      | 0           | 0.107395  | 1.79769e+308 | 0.0731993 | 1        |
| Cdk13_j2         | 2.39725     | 2.19072   | -0.129977    | 0.467791  | 0.766747 |
| Rala_j3          | 0.589001    | 1.20697   | 0            | 1         | 1        |
| Zfp187_j7        | 2.49182     | 4.30629   | 0            | 1         | 1        |
| Zfp187_j6        | 0.499965    | 0.255447  | 0            | 1         | 1        |
| Zfp192_j2        | 1.88458     | 1.75072   | 0            | 1         | 1        |
| Zfp322a_j3       | 0.25483     | 0.454655  | 0            | 1         | 1        |
| Hist1h2be        | 0.443013    | 1.04104   | 0            | 1         | 1        |
| Aldh5a1_j1       | 0.753006    | 0.584531  | 0            | 1         | 1        |
| Mrs2_j1          | 1.03677     | 1.94122   | 0            | 1         | 1        |
| XLOC_008472      | 0.423061    | 0.304196  | -0.475865    | 0.430265  | 0.743094 |
| Cdkal1_j2        | 0.00218434  | 0.836264  | 8.58062      | 0.105359  | 0.403145 |
| Exoc2_j2         | 6.97308     | 8.26821   | 0            | 1         | 1        |
| Serpib1a_j5      | 2.52805     | 5.58253   | 1.1429       | 1.15E-07  | 6.06E-06 |
| Serpib6a_j5      | 8.58138     | 11.7024   | 0            | 1         | 1        |
| Serpib6a         | 22.2761     | 23.3655   | 0            | 1         | 1        |
| Serpib6a_j6      | 0.811658    | 1.42339   | 0            | 1         | 1        |
| Tubb2b_j2        | 145.16      | 210.18    | 0            | 1         | 1        |
| 1300014I06Rik_j2 | 2.2499      | 5.46422   | 0            | 1         | 1        |
| Peci             | 1.62331     | 1.64142   | 0            | 1         | 1        |
| Nrn1_j3          | 0           | 0.0962884 | 0            | 1         | 1        |
| Ccdc90a_j2       | 1.04577     | 1.13987   | 0.124296     | 0.644773  | 0.863009 |
| AK034282_j1      | 0.160138    | 0.183126  | 0.193522     | 0.860446  | 0.955855 |
| Zfp169           | 0.05654     | 0.43011   | 0            | 1         | 1        |
| Ptpdc1_j2        | 0.289253    | 0.318843  | 0            | 1         | 1        |
| Ptpdc1_j7        | 2.53684     | 1.98406   | 0            | 1         | 1        |
| Fam120a_j1       | 3.60351     | 3.36493   | -0.0988278   | 0.635088  | 0.858471 |
| Fgd3_j1          | 0.116318    | 0.221872  | 0.931658     | 0.0759132 | 0.332839 |
| XLOC_008543      | 0.277215    | 0.323776  | 0.223989     | 0.779159  | 0.925601 |
| Sema4d_j2        | 0.169235    | 0.137247  | 0            | 1         | 1        |
| Sema4d_j1        | 0.321022    | 0.187699  | 0            | 1         | 1        |

|                  |            |           |              |           |           |
|------------------|------------|-----------|--------------|-----------|-----------|
| Auh_j2           | 0.299689   | 3.28458   | 0            | 1         | 1         |
| Auh_j3           | 0.00170303 | 4.36567   | 0            | 1         | 1         |
| Auh              | 15.7237    | 14.3241   | 0            | 1         | 1         |
| Nfil3_j3         | 0.0197375  | 1.07381   | 0            | 1         | 1         |
| 4833439L19Rik_j3 | 23.7204    | 27.6991   | 0            | 1         | 1         |
| 4833439L19Rik    | 11.4819    | 9.22295   | 0            | 1         | 1         |
| Nop16_j2         | 0.0808041  | 0.22329   | 1.46642      | 0.240203  | 0.587475  |
| Rnf44            | 4.43366    | 4.77713   | 0            | 1         | 1         |
| Hk3_j3           | 0.149831   | 0.173753  | 0            | 1         | 1         |
| Hk3_j4           | 0          | 0.170635  | 0            | 1         | 1         |
| Hk3_j6           | 0          | 0.0637415 | 0            | 1         | 1         |
| Uimc1_j5         | 0          | 0.21718   | 1.79769e+308 | 0.0127224 | 0.102403  |
| Mxd3_j1          | 22.8055    | 26.2019   | 0.200289     | 0.0563164 | 0.277694  |
| Pdlim7_j9        | 5.85342    | 7.45641   | 0.349202     | 0.136688  | 0.459705  |
| Ddx41_j1         | 0.34605    | 0.777289  | 0            | 1         | 1         |
| Fam193b_j4       | 0.328902   | 0.123424  | 0            | 1         | 1         |
| Trp7_j6          | 0          | 0.0911479 | 1.79769e+308 | 0.0172526 | 1         |
| Trp7_j8          | 0.051286   | 0.0441933 | -0.214736    | 0.857226  | 1         |
| Trp7_j7          | 0.0385475  | 0.209501  | 2.44225      | 0.005189  | 0.0521674 |
| AK045807         | 0.0432433  | 0.11755   | 1.44272      | 0.348523  | 1         |
| Ctla2a_j1        | 2.0731     | 4.02966   | 0.95887      | 0.0209862 | 0.145695  |
| Ctla2a_j2        | 0.561061   | 0.958376  | 0.772434     | 0.134341  | 0.456189  |
| Slc35d2_j1       | 0.12963    | 0.419167  | 1.69312      | 0.0145073 | 0.112282  |
| Cdc14b_j1        | 0.269302   | 0.208574  | 0            | 1         | 1         |
| Cdc14b_j2        | 1.51684    | 1.29667   | 0            | 1         | 1         |
| Cntnap3_j5       | 0.291155   | 0.0910997 | -1.67627     | 0.0041497 | 0.0440735 |
| Zfp708_j1        | 0          | 0.0591901 | 1.79769e+308 | 0.0542776 | 1         |
| Zfp708_j9        | 0.082985   | 0.17867   | 1.10638      | 0.345366  | 0.684733  |
| Zfp458_j5        | 0.208122   | 0.190356  | -0.128728    | 0.794152  | 0.931387  |
| Zfp458_j7        | 0.0511908  | 0.113974  | 1.15475      | 0.13597   | 1         |
| Zfp874b_j5       | 0.0925616  | 0.276856  | 0            | 1         | 1         |
| A530054K11Rik_j1 | 2.49634    | 2.74428   | 0.136613     | 0.335547  | 0.676258  |
| Adcy2_j2         | 0          | 3.07389   | 0            | 1         | 1         |
| Adcy2_j3         | 0.253914   | 0.291198  | 0            | 1         | 1         |
| Adamts16_j2      | 0.0166145  | 0.065279  | 1.97418      | 0.207168  | 1         |
| Nkd2_j1          | 0          | 0.0773799 | 1.79769e+308 | 0.0166491 | 1         |
| Trip13_j3        | 0          | 0.0944067 | 1.79769e+308 | 0.0979369 | 1         |
| Exoc3_j4         | 13.0079    | 12.637    | 0            | 1         | 1         |
| XLOC_008661      | 0.46748    | 0.161017  | -1.53769     | 0.0346684 | 0.204522  |
| Cast             | 8.35492    | 8.77841   | 0            | 1         | 1         |
| Rhobtb3_j1       | 0.100486   | 0.239166  | 0            | 1         | 1         |
| Arsk_j6          | 2.41E-05   | 0.133767  | 12.4411      | 0.971134  | 1         |
| Rasa1_j2         | 9.08906    | 9.30264   | 0            | 1         | 1         |
| Xrcc4_j1         | 0.497865   | 0.930049  | 0.901551     | 0.0562435 | 0.277482  |
| Atp6ap1l_j1      | 0.0601535  | 0.255816  | 2.08838      | 0.187866  | 0.52901   |
| Atp6ap1l_j3      | 0          | 0.281568  | 1.79769e+308 | 0.0241968 | 0.160606  |
| Rasgrf2_j8       | 1.16041    | 2.33704   | 0            | 1         | 1         |

|                  |           |           |               |           |           |
|------------------|-----------|-----------|---------------|-----------|-----------|
| Scamp1_j1        | 32.3134   | 28.8502   | 0             | 1         | 1         |
| Pde8b_j5         | 0         | 0.53581   | 0             | 1         | 1         |
| Polk_j2          | 0.0408938 | 0.0560033 | 0             | 1         | 1         |
| Hmgcr_j4         | 16.3381   | 21.408    | 0             | 1         | 1         |
| Btf3_j1          | 5.14284   | 4.99124   | -0.0431673    | 0.808974  | 0.937258  |
| Btf3_j5          | 13.5016   | 15.4062   | 0.190381      | 0.377705  | 0.709365  |
| Fcho2_j1         | 0.505604  | 0.6148    | 0             | 1         | 1         |
| Fcho2_j2         | 0.115707  | 0.0743114 | 0             | 1         | 1         |
| Tnpo1_j4         | 1.3022    | 0.903316  | -0.527644     | 0.167615  | 0.504117  |
| Tnpo1_j7         | 0.0955131 | 0.113792  | 0.25263       | 0.847273  | 1         |
| Cartpt_j1        | 0.0687853 | 0.140198  | 1.02729       | 0.51984   | 1         |
| Bdp1_j5          | 0.287858  | 0.206539  | -0.478943     | 0.171739  | 0.508904  |
| Slc30a5_j4       | 0.109872  | 0.238198  | 0             | 1         | 1         |
| Mast4_j1         | 0.543708  | 0.769854  | 0             | 1         | 1         |
| Mast4_j7         | 0.0167652 | 0.217242  | 0             | 1         | 1         |
| Mast4_j8         | 0.0392322 | 0.124467  | 0             | 1         | 1         |
| Erbp2ip_j3       | 1.43113   | 1.91977   | 0             | 1         | 1         |
| 2410002O22Rik_j1 | 0         | 1.7958    | 0             | 1         | 1         |
| Rgs7bp_j1        | 0         | 1.32694   | 0             | 1         | 1         |
| Rnf180_j1        | 0.496024  | 0.462315  | 0             | 1         | 1         |
| Kif2a            | 2.67228   | 1.98271   | 0             | 1         | 1         |
| Zswim6_j1        | 1.29517   | 1.80856   | 0.481695      | 0.0407027 | 0.226441  |
| Rab3c_j1         | 2.81936   | 3.79816   | 0             | 1         | 1         |
| Map3k1_j6        | 0.923811  | 0.756344  | 0             | 1         | 1         |
| Ddx4_j1          | 0         | 0.0625494 | 1.79769e+308  | 0.0729552 | 1         |
| Skiv2l2_j4       | 0.719271  | 3.37887   | 0             | 1         | 1         |
| Ndufs4_j2        | 21.493    | 23.4445   | 0.125385      | 0.252568  | 0.600518  |
| Fst_j1           | 1.87962   | 7.05066   | 1.90732       | 0         | 0         |
| Itga2_j6         | 0.0869502 | 0.14176   | 0.705188      | 0.52075   | 1         |
| Itga1            | 0.339844  | 0.268333  | -0.340847     | 0.251091  | 0.598953  |
| Isl1_j2          | 11.8737   | 12.4005   | 0             | 1         | 1         |
| Parp8_j1         | 0.433623  | 0.367086  | -0.240322     | 0.439583  | 0.74915   |
| Parp8_j6         | 3.93172   | 4.64244   | 0.239725      | 0.129922  | 0.448911  |
| 2810429I04Rik_j1 | 0.0982602 | 0.127225  | 0.372706      | 0.665196  | 1         |
| Dip2c_j3         | 0.12842   | 0         | -1.79769e+308 | 5.02E-07  | 1         |
| XLOC_008076      | 0.201348  | 0.0991966 | -1.02133      | 0.475572  | 0.771443  |
| Psm2_j2          | 32.9725   | 35.713    | 0.115189      | 0.450699  | 0.756228  |
| AW209491_j1      | 0         | 0.849678  | 0             | 1         | 1         |
| 2810021B07Rik    | 0.598803  | 0.399335  | -0.584481     | 0.151742  | 0.483048  |
| XLOC_008086      | 0.80617   | 0.795055  | -0.0200297    | 0.939849  | 0.981755  |
| XLOC_008087      | 0         | 0.115689  | 1.79769e+308  | 0.0502759 | 1         |
| Vps41_j2         | 0         | 0.137069  | 0             | 1         | 1         |
| Sfrp4_j3         | 0         | 0.254784  | 1.79769e+308  | 0.0364998 | 0.21121   |
| Elmo1_j3         | 11.2401   | 8.12864   | -0.467572     | 0.0004501 | 0.0074608 |
| Aoah             | 0.123815  | 0.105606  | -0.229499     | 0.872796  | 1         |
| Aoah_j3          | 0         | 0.182048  | 1.79769e+308  | 0.0144486 | 0.11197   |
| Gm11274_j1       | 0         | 0.189726  | 1.79769e+308  | 0.0094258 | 0.0820157 |

|                  |           |           |              |           |           |
|------------------|-----------|-----------|--------------|-----------|-----------|
| Fam65b_j3        | 0.0209345 | 0.0934374 | 2.15812      | 1         | 1         |
| XLOC_008130      | 0.268175  | 0.436399  | 0.702473     | 0.370353  | 0.703609  |
| Serpib9_j1       | 2.43666   | 1.90514   | -0.355013    | 0.0555141 | 0.27529   |
| Cdyl_j1          | 0.159423  | 0.232069  | 0.541691     | 0.402248  | 0.725446  |
| Fars2_j2         | 10.0909   | 10.1395   | 0.00692076   | 0.957993  | 0.987996  |
| XLOC_008140      | 0.122931  | 0.184935  | 0.589172     | 0.580481  | 0.831589  |
| Rreb1_j6         | 0         | 0.0554691 | 1.79769e+308 | 0.007503  | 1         |
| Rreb1_j8         | 0.212451  | 0.219709  | 0.048465     | 0.918633  | 0.974658  |
| Pak1ip1_j1       | 0.54958   | 0.796736  | 0            | 1         | 1         |
| Sirt5_j3         | 0.40947   | 0.382123  | -0.0997195   | 0.900445  | 0.968327  |
| Nol7_j1          | 15.5862   | 16.2457   | 0            | 1         | 1         |
| Nol7_j2          | 1.92062   | 1.81972   | 0            | 1         | 1         |
| Cd83_j1          | 0.194135  | 0.241414  | 0.314447     | 0.634783  | 0.858242  |
| Jarid2_j4        | 0.0202073 | 0.557694  | 4.78653      | 1.67E-07  | 8.41E-06  |
| Jarid2_j5        | 1.07396   | 1.53426   | 0.514598     | 0.0589115 | 0.285415  |
| Rnf144b_j5       | 0.156064  | 0.594817  | 0            | 1         | 1         |
| Gm8619_j1        | 0.238286  | 0.26277   | 0.141104     | 0.835209  | 0.946964  |
| Bicd2_j5         | 0         | 0.184894  | 1.79769e+308 | 0.0012196 | 0.0167593 |
| Nol8_j4          | 2.25749   | 2.9655    | 0            | 1         | 1         |
| Fbxw17_j2        | 1.10428   | 1.35684   | 0            | 1         | 1         |
| Nxnl2_j3         | 0.273016  | 0.550884  | 1.01276      | 0.148123  | 0.476931  |
| S1pr3_j1         | 27.7164   | 26.5852   | 0            | 1         | 1         |
| Gadd45g_j2       | 0.115541  | 0.603889  | 2.38588      | 0.151271  | 0.48235   |
| Sykb             | 0.0902937 | 0.17986   | 0.994179     | 0.0565889 | 0.278347  |
| Sykb_j6          | 0.142755  | 0.211542  | 0.5674       | 0.28921   | 0.636786  |
| AK030238_j3      | 0.261237  | 0.282572  | 0.113259     | 0.822378  | 0.942695  |
| Sfxn1_j2         | 0.840427  | 1.04675   | 0            | 1         | 1         |
| Arl10_j1         | 0.0194474 | 0.0580148 | 1.57684      | 0.294483  | 1         |
| Tspan17_j7       | 25.5282   | 33.7232   | 0.401649     | 0.0007786 | 0.0117246 |
| Zfp346_j2        | 0.0809788 | 0.505436  | 0            | 1         | 1         |
| CamI_j1          | 13.4951   | 16.9632   | 0.329972     | 0.02398   | 0.159678  |
| Ddx46_j2         | 1.13875   | 1.01172   | -0.170644    | 0.522835  | 0.799134  |
| Catsper3_j1      | 0.0357899 | 0.124403  | 1.7974       | 0.190971  | 1         |
| Fbxl21           | 0.314253  | 0.376061  | 0.259038     | 0.743867  | 0.91043   |
| AK015814_j4      | 0.0416526 | 0.107621  | 1.36947      | 0.309005  | 1         |
| AK015814_j6      | 0.048586  | 0.0739216 | 0.605454     | 0.675518  | 1         |
| Rmi1_j1          | 3.31867   | 3.63454   | 0            | 1         | 1         |
| Dapk1_j4         | 4.73224   | 5.39286   | 0            | 1         | 1         |
| XLOC_008251      | 0.261381  | 0.332969  | 0            | 1         | 1         |
| 2010111101Rik_j2 | 14.4813   | 14.7592   | 0            | 1         | 1         |
| 0610007P08Rik_j5 | 0.0142746 | 0.0788096 | 0            | 1         | 1         |
| AK002708_j1      | 0.0783716 | 0.282522  | 0            | 1         | 1         |
| Zfp369_j6        | 3.24739   | 4.47883   | 0.463841     | 0.109034  | 0.410755  |
| Zfp273_j1        | 0         | 0.29692   | 1.79769e+308 | 0.000267  | 0.0048634 |
| 1700001L19Rik_j2 | 0.135575  | 0.164113  | 0.275595     | 0.794627  | 0.931482  |
| Mrpl36_j2        | 12.5325   | 13.4549   | 0.102458     | 0.471701  | 0.769131  |
| Lpcat1_j2        | 5.32222   | 5.96607   | 0            | 1         | 1         |

|                  |           |             |              |           |           |
|------------------|-----------|-------------|--------------|-----------|-----------|
| AK017337_j1      | 0.0546428 | 0.125202    | 1.19615      | 0.393098  | 1         |
| XLOC_008292      | 0.301938  | 0.41879     | 0.471974     | 0.257667  | 0.606446  |
| Pcsk1_j1         | 1.97225   | 3.03667     | 0.622645     | 0.0093475 | 0.081531  |
| Ttc37_j3         | 1.12664   | 2.22747     | 0            | 1         | 1         |
| 2210408I21Rik_j2 | 1.56227   | 1.38512     | 0            | 1         | 1         |
| XLOC_008307      | 2.08002   | 1.93626     | -0.103324    | 0.808936  | 0.937258  |
| Lysmd3_j2        | 0.259279  | 0.297605    | 0.198893     | 0.663986  | 0.872726  |
| Mef2c_j2         | 0.315528  | 0.000334118 | 0            | 1         | 1         |
| Mef2c_j1         | 0.428187  | 1.19714     | 0            | 1         | 1         |
| Tmem161b_j4      | 0.419045  | 0.364632    | 0            | 1         | 1         |
| Ssbp2_j1         | 0         | 0.272671    | 1.79769e+308 | 0.030082  | 0.186072  |
| Ssbp2            | 1.54626   | 1.40883     | -0.134288    | 0.358338  | 0.693844  |
| Mtx3_j1          | 3.05374   | 3.34677     | 0            | 1         | 1         |
| Tbca_j6          | 12.6224   | 11.2327     | 0            | 1         | 1         |
| Gfm2_j1          | 4.84788   | 4.47155     | 0            | 1         | 1         |
| XLOC_008345      | 0         | 0.0988284   | 1.79769e+308 | 0.0887016 | 1         |
| XLOC_008345      | 0         | 0.144817    | 1.79769e+308 | 0.065473  | 1         |
| 3830408C21Rik_j6 | 0         | 0.142701    | 1.79769e+308 | 0.0181648 | 1         |
| Elovl7_j2        | 0.779777  | 1.54929     | 0            | 1         | 1         |
| Mier3_j2         | 0.0490335 | 0.0604718   | 0            | 1         | 1         |
| Mier3_j1         | 0.0679334 | 0.111113    | 0            | 1         | 1         |
| Ankrd55_j2       | 0.197608  | 0.241347    | 0.288473     | 0.661843  | 0.871788  |
| Arl15_j1         | 1.06167   | 0.910597    | 0            | 1         | 1         |
| XLOC_008399      | 0.0924689 | 0.128454    | 0.47421      | 0.758582  | 1         |
| Hcn1_j2          | 10.7433   | 9.47454     | -0.181304    | 0.21299   | 0.55791   |
| XLOC_008403      | 0.0851428 | 0.266397    | 1.64562      | 0.131793  | 0.451722  |
| BC016423_j1      | 0.0994428 | 0.270403    | 0            | 1         | 1         |
| BC016423_j5      | 0.468234  | 0.601997    | 0.362527     | 0.514765  | 0.793837  |
| Net1_j4          | 0.263531  | 0.371234    | 0.494357     | 0.293846  | 0.640663  |
| Akr1e1_j2        | 4.28443   | 4.41989     | 0.0449065    | 0.792822  | 0.931005  |
| XLOC_008412      | 0.0468276 | 0.149517    | 1.67488      | 0.0388691 | 1         |
| XLOC_008413      | 3.50E-07  | 0.297676    | 19.6986      | 0.999877  | 0.999918  |
| XLOC_008413      | 0.0342969 | 0.214553    | 2.64518      | 0.238741  | 0.585819  |
| Pfkp_j2          | 0         | 1.06367     | 0            | 1         | 1         |
| Pfkp_j3          | 111.647   | 115.682     | 0            | 1         | 1         |
| Wdr37_j1         | 2.48921   | 3.8364      | 0            | 1         | 1         |
| Gtpbp4_j3        | 1.24394   | 2.76548     | 1.15261      | 0.0004229 | 0.0070836 |
| Zmynd11_j8       | 4.99828   | 5.7446      | 0            | 1         | 1         |
| Zmynd11_j9       | 0.214127  | 0.450898    | 0            | 1         | 1         |
| Ryr2_j9          | 6.21484   | 5.36745     | -0.211479    | 0.244439  | 0.592004  |
| Ryr2_j10         | 0.413779  | 0.207929    | -0.99277     | 0.0005764 | 0.0091761 |
| Ryr2_j16         | 0.0337091 | 0.0931016   | 1.46567      | 0.308502  | 1         |
| Actn2_j5         | 0         | 0.130496    | 1.79769e+308 | 0.0070201 | 1         |
| Lgals8_j3        | 3.52414   | 3.3686      | 0            | 1         | 1         |
| Lgals8_j2        | 3.37275   | 4.10264     | 0            | 1         | 1         |
| Tbce_j2          | 0.0535539 | 0.0147314   | 0            | 1         | 1         |
| Cdk13_j1         | 1.14413   | 0.947642    | -0.271838    | 0.137902  | 0.461717  |

|                  |           |            |              |           |           |
|------------------|-----------|------------|--------------|-----------|-----------|
| Rala_j2          | 11.964    | 19.7138    | 0            | 1         | 1         |
| Epdr1_j1         | 70.0644   | 65.5479    | 0            | 1         | 1         |
| Pgbd1            | 0.0270023 | 0.0942311  | 1.80312      | 0.121667  | 1         |
| Pgbd1            | 0.112434  | 0.0804775  | -0.482423    | 0.54933   | 1         |
| Lrrc16a_j3       | 0         | 0.0738811  | 1.79769e+308 | 0.0086651 | 1         |
| Acot13_j1        | 7.17479   | 6.77207    | -0.0833405   | 0.421364  | 0.73755   |
| XLOC_008472      | 0.422336  | 0.424301   | 0.00669735   | 0.987961  | 0.996422  |
| XLOC_008473      | 0         | 0.126663   | 1.79769e+308 | 0.1044    | 1         |
| XLOC_008473      | 0         | 0.181579   | 1.79769e+308 | 0.0172848 | 0.12725   |
| BC025054_j10     | 0.146851  | 0.276313   | 0.911947     | 0.199197  | 0.542218  |
| BC025054_j11     | 0.183835  | 0.0399082  | -2.20365     | 0.0914922 | 0.371729  |
| Serpinb6a_j10    | 22.1388   | 55.199     | 0            | 1         | 1         |
| Serpinb6a_j11    | 2.8251    | 3.29114    | 0            | 1         | 1         |
| Tubb2a_j5        | 9.98058   | 218.13     | 0            | 1         | 1         |
| Tubb2b_j1        | 83.4779   | 150.24     | 0            | 1         | 1         |
| 1300014106Rik_j1 | 1.40109   | 3.6362     | 0            | 1         | 1         |
| Peci_j5          | 0.907414  | 1.69683    | 0            | 1         | 1         |
| Txndc5_j1        | 1.58303   | 3.2408     | 0            | 1         | 1         |
| Slc35b3_j2       | 0.287387  | 0.383623   | 0.41669      | 0.512623  | 0.792284  |
| Tcfap2a_j3       | 0.558559  | 0.600482   | 0.104411     | 0.759463  | 0.91718   |
| Atxn1_j3         | 0.0156052 | 0.0872636  | 2.48335      | 0.0132528 | 1         |
| AK039480         | 0.195545  | 0.1371     | -0.512271    | 0.576949  | 0.829228  |
| Ptpdc1_j5        | 4.69122   | 3.89445    | 0            | 1         | 1         |
| Ptpdc1_j6        | 0.117303  | 0.30413    | 0            | 1         | 1         |
| Phf2_j1          | 2.60794   | 2.5579     | -0.0279502   | 0.893977  | 0.966325  |
| Wnk2_j1          | 1.17622   | 0.990809   | 0            | 1         | 1         |
| Fgd3_j4          | 0         | 0.093748   | 1.79769e+308 | 0.029019  | 1         |
| Fgd3_j3          | 0.318234  | 0.319713   | 0.00668957   | 0.98795   | 0.996422  |
| Auh_j4           | 4.37971   | 5.42168    | 0            | 1         | 1         |
| Auh_j5           | 0.507646  | 0.478537   | 0            | 1         | 1         |
| Nfil3_j2         | 0.993066  | 3.93507    | 0            | 1         | 1         |
| Ror2_j1          | 0.698246  | 0.895724   | 0            | 1         | 1         |
| Sptlc1_j1        | 1.76177   | 2.46347    | 0.483669     | 0.0810579 | 0.346632  |
| Cltb_j1          | 0.591238  | 0.546256   | 0            | 1         | 1         |
| Rnf44_j7         | 0.688668  | 1.41758    | 0            | 1         | 1         |
| Gprin1_j1        | 0         | 0.0925362  | 0            | 1         | 1         |
| Sncb_j2          | 14.0792   | 14.1644    | 0.00869505   | 0.95752   | 0.987909  |
| Hk3_j1           | 1.11174   | 1.21596    | 0            | 1         | 1         |
| Uimc1_j1         | 0.316412  | 0.402676   | 0.347814     | 0.591692  | 0.83728   |
| Uimc1_j3         | 0.0496458 | 0.290291   | 2.54776      | 0.0043917 | 0.0460917 |
| Uimc1_j2         | 0.328746  | 0.527621   | 0.68253      | 0.169528  | 0.506494  |
| Rab24_j1         | 0.156069  | 0.246843   | 0.661413     | 0.141842  | 0.468503  |
| Dbn1_j1          | 0         | 0.334763   | 0            | 1         | 1         |
| Pdlim7_j12       | 0.343052  | 0.00261534 | -7.03529     | 0.595632  | 0.838891  |
| Fam193b_j5       | 1.13354   | 1.34506    | 0            | 1         | 1         |
| H2afy            | 4.47231   | 5.22661    | 0            | 1         | 1         |
| Cxcl14_j1        | 0         | 0.0867543  | 1.79769e+308 | 0.0776075 | 1         |



|                  |            |           |              |           |           |
|------------------|------------|-----------|--------------|-----------|-----------|
| Spock1_j1        | 0.50256    | 0.693017  | 0            | 1         | 1         |
| Klhl3_j6         | 0.0956128  | 0.171214  | 0.840522     | 0.145368  | 0.473254  |
| Klhl3_j11        | 0          | 0.141189  | 1.79769e+308 | 0.0977913 | 1         |
| Klhl3_j12        | 0.299211   | 0.262015  | -0.191513    | 0.748824  | 0.912687  |
| Hnrnpk_j1        | 45.4773    | 43.3534   | 0            | 1         | 1         |
| Hnrnpk_j9        | 0.155225   | 0.171985  | 0            | 1         | 1         |
| Agtpbp1_j5       | 0.182295   | 1.23123   | 2.75576      | 8.27E-12  | 1.03E-09  |
| Agtpbp1_j6       | 0.418961   | 0.539872  | 0.3658       | 0.320113  | 0.66344   |
| Zcchc6_j6        | 3.33202    | 4.3868    | 0            | 1         | 1         |
| Zcchc6_j7        | 0.327463   | 0.116833  | 0            | 1         | 1         |
| Ctla2a           | 3.50319    | 8.12293   | 1.21333      | 2.78E-07  | 1.33E-05  |
| Gm3604_j1        | 0.422792   | 0.319381  | -0.404669    | 0.369704  | 0.703138  |
| Zfp934_j2        | 0.943903   | 0.865896  | 0            | 1         | 1         |
| Fbp1_j1          | 0.123028   | 0.266845  | 1.11702      | 0.275777  | 0.624703  |
| Fbp1_j2          | 0.261054   | 0.293664  | 0.169817     | 0.777362  | 0.924696  |
| Slc35d2_j4       | 0.163429   | 0.167082  | 0.0318855    | 0.970544  | 0.991668  |
| Ctsl_j1          | 64.646     | 53.5728   | 0            | 1         | 1         |
| Cntnap3_j3       | 0.77926    | 1.02319   | 0.392895     | 0.0847735 | 0.355482  |
| Uqcrb            | 8.16264    | 7.91145   | 0            | 1         | 1         |
| Zfp708_j3        | 0          | 0.0638916 | 1.79769e+308 | 0.0718854 | 1         |
| Zfp708_j6        | 0.232311   | 0.310518  | 0.418621     | 0.461772  | 0.762976  |
| Zfp458_j8        | 0.190841   | 0.0758048 | -1.33201     | 0.0834374 | 0.352255  |
| Zfp458_j9        | 0          | 0.0702166 | 1.79769e+308 | 0.033008  | 1         |
| Zfp595_j2        | 0          | 0.295688  | 1.79769e+308 | 4.89E-06  | 0.0001658 |
| Zfp874b_j4       | 1.67816    | 1.78125   | 0            | 1         | 1         |
| Mtrr_j1          | 0.072014   | 0.23316   | 1.69497      | 0.0419696 | 0.23135   |
| A530095I07Rik    | 0.123256   | 0.204063  | 0            | 1         | 1         |
| Adamts16_j6      | 0.066666   | 0.118388  | 0.828494     | 0.49169   | 1         |
| Exoc3_j3         | 0          | 0.0872039 | 0            | 1         | 1         |
| Ahrr_j4          | 0          | 0.0841493 | 1.79769e+308 | 0.0139856 | 1         |
| Sdha_j1          | 46.8935    | 48.2197   | 0            | 1         | 1         |
| XLOC_008659      | 0          | 0.0816296 | 1.79769e+308 | 0.11522   | 1         |
| XLOC_008661      | 0.00586879 | 0.191585  | 5.02878      | 0.156604  | 0.49018   |
| XLOC_008661      | 0.110203   | 0.197013  | 0.838128     | 0.492311  | 0.780929  |
| XLOC_008661      | 0.341277   | 0.385086  | 0.174236     | 0.785758  | 0.928253  |
| Cast_j3          | 8.7848     | 8.02451   | 0            | 1         | 1         |
| Nr2f1_j1         | 0.102806   | 4.38765   | 0            | 1         | 1         |
| Rasa1_j4         | 0.188576   | 0.330777  | 0            | 1         | 1         |
| Cox7c_j4         | 23.543     | 23.4178   | -0.00769251  | 0.96058   | 0.988869  |
| Cox7c_j3         | 2.58593    | 3.08435   | 0.254282     | 0.280128  | 0.628973  |
| Atp6ap1l_j2      | 1.3312     | 0.984369  | -0.435455    | 0.528526  | 0.802073  |
| 4833422C13Rik_j2 | 0.642966   | 0.540719  | -0.249863    | 0.363042  | 0.697188  |
| Rasgrf2_j5       | 0.0411565  | 0.111013  | 0            | 1         | 1         |
| Msh3_j3          | 1.23744    | 0.89718   | 0            | 1         | 1         |
| Msh3_j2          | 0          | 0.460764  | 0            | 1         | 1         |
| Zfyve16_j1       | 1.89651    | 1.68523   | -0.170403    | 0.256421  | 0.60531   |
| Papd4_j1         | 0.752111   | 1.16529   | 0.631674     | 0.0509943 | 0.261718  |

|                  |           |           |              |           |           |
|------------------|-----------|-----------|--------------|-----------|-----------|
| Papd4_j8         | 1.13543   | 1.43434   | 0.337154     | 0.46631   | 0.766007  |
| F2rl1_j1         | 0.0737827 | 0.0728562 | -0.0182297   | 0.986989  | 1         |
| lqgap2_j3        | 0.137453  | 0.510448  | 1.89283      | 0.0001135 | 0.0023959 |
| lqgap2_j5        | 0         | 0.118741  | 1.79769e+308 | 0.001131  | 1         |
| Hmgcr_j2         | 11.9207   | 19.1971   | 0            | 1         | 1         |
| Utp15_j2         | 0.527337  | 0.7308    | 0.470752     | 0.192264  | 0.534507  |
| Tnpo1_j3         | 0         | 0.12197   | 1.79769e+308 | 0.0460376 | 1         |
| Tnpo1_j2         | 4.49E-05  | 0.063768  | 10.4729      | 0.973133  | 1         |
| Tnpo1_j6         | 0.0773386 | 0.114884  | 0.570914     | 0.592456  | 1         |
| Cartpt_j4        | 12.9837   | 11.6345   | -0.158298    | 0.316045  | 0.659956  |
| Mccc2_j1         | 0.127062  | 1.10139   | 3.11572      | 2.57E-06  | 9.48E-05  |
| Bdp1_j4          | 0.0769347 | 0.105896  | 0.460936     | 0.390208  | 1         |
| Marveld2         | 0.298571  | 0.160687  | -0.893822    | 0.244812  | 0.592355  |
| Rad17            | 1.14354   | 3.69805   | 0            | 1         | 1         |
| Slc30a5_j5       | 5.5132    | 7.47772   | 0            | 1         | 1         |
| XLOC_008740      | 0         | 0.197737  | 1.79769e+308 | 0.0136112 | 0.107311  |
| Mast4_j3         | 0         | 0.17639   | 0            | 1         | 1         |
| Nln_j2           | 0.187317  | 0.202009  | 0.108942     | 0.855208  | 0.954239  |
| Rgs7bp_j6        | 0.0867408 | 0.175199  | 0            | 1         | 1         |
| Rgs7bp_j7        | 2.50914   | 0.89756   | 0            | 1         | 1         |
| Rnf180_j4        | 0         | 0.108339  | 0            | 1         | 1         |
| Gpbp1_j1         | 4.67712   | 4.64325   | 0            | 1         | 1         |
| Gpbp1_j2         | 0         | 0.452007  | 0            | 1         | 1         |
| Map3k1_j5        | 2.53549   | 2.32366   | 0            | 1         | 1         |
| Il31ra_j5        | 0         | 0.514233  | 0            | 1         | 1         |
| Il31ra_j7        | 1.82755   | 1.65846   | 0            | 1         | 1         |
| Il31ra_j6        | 0         | 0.503453  | 0            | 1         | 1         |
| Ddx4_j4          | 0         | 0.239657  | 1.79769e+308 | 0.0010074 | 0.0144036 |
| Itga1_j1         | 0         | 0.0685958 | 1.79769e+308 | 0.0361108 | 1         |
| XLOC_008773      | 0.0969492 | 0.0499179 | -0.957672    | 0.350796  | 1         |
| Parp8_j7         | 0         | 0.0565373 | 1.79769e+308 | 0.100499  | 1         |
| Gm17048          | 8.76405   | 13.9146   | 0.666927     | 2.82E-06  | 0.000103  |
| Gm17128          | 6.55691   | 11.6554   | 0.829909     | 4.38E-08  | 2.62E-06  |
| Gm5456           | 35.2256   | 56.2726   | 0.67581      | 1.52E-11  | 1.79E-09  |
| Gm17121          | 41.9934   | 64.731    | 0.624294     | 1.62E-10  | 1.57E-08  |
| Gm8396           | 2.74123   | 3.22645   | 0.235122     | 0.282299  | 0.630871  |
| Flnb_j2          | 1.38959   | 0.930064  | 0            | 1         | 1         |
| Flnb_j6          | 1.15144   | 0         | 0            | 1         | 1         |
| Flnb_j7          | 2.39005   | 2.6445    | 0            | 1         | 1         |
| Abhd6_j1         | 4.93388   | 4.65056   | -0.0853177   | 0.692973  | 0.886259  |
| Rpp14            | 1.97887   | 1.78759   | -0.146663    | 0.364266  | 0.698391  |
| Kctd6_j2         | 21.6614   | 18.0786   | -0.260843    | 0.0273606 | 0.174853  |
| Ptprg            | 3.59911   | 3.00188   | 0            | 1         | 1         |
| Ptprg            | 4.50791   | 4.6823    | 0            | 1         | 1         |
| 3830406C13Rik    | 0.101553  | 0.0654406 | -0.633973    | 0.746213  | 1         |
| 3830406C13Rik_j7 | 2.49697   | 3.17103   | 0.344775     | 0.307011  | 0.652122  |
| Gm5457           | 5.36939   | 4.96309   | -0.113518    | 0.666508  | 0.873739  |

|                  |           |                      |            |           |           |
|------------------|-----------|----------------------|------------|-----------|-----------|
| Synpr            | 96.6489   | 69.4897              | -0.475954  | 4.28E-08  | 2.57E-06  |
| Atxn7_j2         | 0.103099  | 0.0246739            | -2.06298   | 0.0512626 | 1         |
| Atxn7            | 0.638361  | 0.619006             | -0.0444183 | 0.862446  | 0.956422  |
| Atxn7_j1         | 0.0777498 | 0.0794739            | 0.0316424  | 0.960842  | 1         |
| Il3ra_j7         | 0.320902  | 0.582336             | 0.85972    | 0.133675  | 0.455069  |
| Il3ra_j10        | 0.566783  | 0.738406             | 0.381618   | 0.337292  | 0.677824  |
| Il3ra_j15        | 0.219556  | 0.46911              | 1.09534    | 0.0566874 | 0.278516  |
| Slc4a7_j2        | 0.18188   | 0                    | 0          | 1         | 1         |
| Slc4a7_j4        | 0.181293  | 0.27001              | 0          | 1         | 1         |
| AK080648_j2      | 0.560343  | 0.416453             | 0          | 1         | 1         |
| AK080648_j1      | 0.103514  | 0.132478             | 0          | 1         | 1         |
| AK080648         | 0.178113  | 0.1505               | 0          | 1         | 1         |
| XLOC_009555      | 0.137603  | 0.119186             | 0          | 1         | 1         |
| Ngly1            | 14.3753   | 12.3634              | -0.217517  | 0.0510443 | 0.26188   |
| Top2b_j1         | 0.470878  | 0.260434             | 0          | 1         | 1         |
| Top2b_j3         | 2.90144   | 2.4974               | 0          | 1         | 1         |
| Top2b_j6         | 8.15735   | 10.6075              | 0          | 1         | 1         |
| Thrb             | 0.217228  | 3.82E-05             | -12.4727   | 0.898698  | 0.967622  |
| Nkiras1          | 8.89337   | 6.76628              | -0.394368  | 2.20E-05  | 0.0005998 |
| Nid2             | 0.168798  | 0.119505             | -0.498235  | 0.16349   | 0.498839  |
| Nudt13_j2        | 0.110538  | 0.14545              | 0          | 1         | 1         |
| Nudt13_j1        | 0.0255973 | 0.0980805            | 0          | 1         | 1         |
| XLOC_009563      | 0.0546013 | 0.0591697            | 0          | 1         | 1         |
| Fam149b          | 5.54262   | 4.76436              | -0.218285  | 0.140982  | 0.466982  |
| Sec24c_j6        | 2.58421   | 1.17827              | -1.13305   | 6.41E-09  | 4.69E-07  |
| Sec24c_j8        | 2.94216   | 2.6386               | -0.157102  | 0.24605   | 0.593583  |
| 2310021P13Rik    | 6.19004   | 6.01827              | 0          | 1         | 1         |
| 2310021P13Rik_j4 | 0.54854   | 0.471907             | 0          | 1         | 1         |
| Plau             | 2.70342   | 4.00559              | 0          | 1         | 1         |
| Plau_j2          | 0.584369  | 0.671614             | 0          | 1         | 1         |
| Vcl              | 7.29826   | 6.39707              | 0          | 1         | 1         |
| Vcl_j4           | 1.32598   | 1.71903              | 0          | 1         | 1         |
| Adk              | 0.205196  | 0.209412             | 0.0293382  | 0.967575  | 0.990858  |
| Adk              | 110.816   | 103.331              | -0.100885  | 0.252989  | 0.600981  |
| Myst4_j3         | 0.123287  | 0                    | 0          | 1         | 1         |
| Myst4_j5         | 0.147083  | 0.0950961            | 0          | 1         | 1         |
| Myst4_j9         | 0.763085  | 0.881172             | 0          | 1         | 1         |
| Samd8            | 2.40113   | 1.76464              | 0          | 1         | 1         |
| Samd8            | 1.89769   | 2.25478              | 0          | 1         | 1         |
| Vdac2_j3         | 47.526    | 51.8974              | 0          | 1         | 1         |
| 1700112E06Rik_j3 | 0.87459   | 0 -1.79769e+308      |            | 2.68E-05  | 0.0007031 |
| Rps24_j2         | 0.953965  | 1.04339              | 0          | 1         | 1         |
| Rps24_j3         | 1.28258   | 0                    | 0          | 1         | 1         |
| Zmiz1            | 0.0449461 | 0.473151             | 3.39603    | 4.74E-08  | 2.81E-06  |
| Zmiz1_j3         | 0.700309  | 0 -1.79769e+308      |            | 1.78E-14  | 3.28E-12  |
| Zmiz1_j5         | 0         | 0.40534 1.79769e+308 |            | 4.68E-07  | 2.12E-05  |
| Zmiz1_j7         | 1.61141   | 2.25614              | 0.485538   | 0.0571836 | 0.280191  |

|                  |           |                 |            |           |           |
|------------------|-----------|-----------------|------------|-----------|-----------|
| Ppif             | 7.04623   | 6.77427         | -0.0567872 | 0.721096  | 0.90017   |
| Ppif_j2          | 8.39286   | 7.58649         | -0.14573   | 0.43114   | 0.743472  |
| Anxa11_j4        | 0.190864  | 0.0231015       | -3.04649   | 0.0635465 | 0.298867  |
| Anxa11_j3        | 18.6527   | 18.4701         | -0.0141969 | 0.892325  | 0.965882  |
| Fam116a_j1       | 3.49941   | 4.03325         | 0          | 1         | 1         |
| Fam116a          | 1.23204   | 1.11863         | 0          | 1         | 1         |
| Arf4             | 46.9549   | 52.3925         | 0.158084   | 0.0820786 | 0.349173  |
| Il17rd_j1        | 0.0939694 | 0.0229893       | -2.03123   | 0.261005  | 1         |
| D14Abb1e         | 1.13721   | 0.844804        | -0.428805  | 0.0072354 | 0.0675736 |
| D14Abb1e_j7      | 1.01388   | 1.08859         | 0.102573   | 0.623079  | 0.852674  |
| Erc2_j2          | 3.37683   | 4.62305         | 0          | 1         | 1         |
| Erc2_j1          | 0.985878  | 0.0891363       | 0          | 1         | 1         |
| Erc2_j12         | 7.87407   | 9.52586         | 0          | 1         | 1         |
| Wnt5a_j1         | 0.478384  | 0.834906        | 0          | 1         | 1         |
| Wnt5a            | 1.24021   | 1.26121         | 0          | 1         | 1         |
| Wnt5a_j4         | 0.757694  | 0.539105        | 0          | 1         | 1         |
| Selk             | 7.41512   | 7.27376         | -0.027767  | 0.837954  | 0.948329  |
| Actr8            | 0.564457  | 0.529858        | -0.0912592 | 0.72989   | 0.904547  |
| Chdh             | 0.208529  | 0.218189        | 0          | 1         | 1         |
| Dcp1a            | 1.29584   | 1.14369         | 0          | 1         | 1         |
| Tkt_j3           | 81.7019   | 87.0082         | 0          | 1         | 1         |
| Tkt_j6           | 0.0854298 | 0.0719204       | 0          | 1         | 1         |
| Rft1             | 0.125552  | 0.0154895       | -3.01892   | 0.236486  | 1         |
| Rft1             | 4.58633   | 4.62349         | 0.0116433  | 0.938878  | 0.981348  |
| Sfmbt1           | 1.66484   | 1.94328         | 0          | 1         | 1         |
| Sfmbt1_j1        | 0.329569  | 0.210301        | 0          | 1         | 1         |
| Sfmbt1_j3        | 0.750222  | 0.55703         | 0          | 1         | 1         |
| Tmem110_j1       | 0.393562  | 0.477399        | 0.278603   | 0.512884  | 0.7923    |
| Tmem110_j2       | 0.329094  | 0 -1.79769e+308 |            | 1.54E-10  | 1.50E-08  |
| Mustn1           | 1.42941   | 2.185           | 0.612212   | 0.004865  | 0.0496708 |
| XLOC_009601      | 0.238335  | 0.0860291       | -1.4701    | 0.133297  | 0.454257  |
| Nek4             | 1.00306   | 0.961339        | -0.0612918 | 0.800774  | 0.933693  |
| Glt8d1           | 2.70329   | 2.38582         | 0          | 1         | 1         |
| Glt8d1_j1        | 5.48963   | 5.18234         | 0          | 1         | 1         |
| Pbrm1_j5         | 0.236755  | 0.158885        | 0          | 1         | 1         |
| Nt5dc2_j1        | 1.00221   | 0.770628        | -0.379085  | 0.174916  | 0.513197  |
| Tnnc1_j2         | 0.0511094 | 0               | 0          | 1         | 1         |
| Tnnc1_j7         | 0.171417  | 0.182457        | 0          | 1         | 1         |
| Tnnc1_j6         | 0.0857488 | 0               | 0          | 1         | 1         |
| Tnnc1_j8         | 0.41842   | 0               | 0          | 1         | 1         |
| Sema3g           | 2.43124   | 2.83579         | 0          | 1         | 1         |
| Bap1             | 30.4715   | 27.5868         | -0.143484  | 0.111746  | 0.416081  |
| Capn7            | 4.30502   | 3.80582         | 0          | 1         | 1         |
| Eaf1             | 9.60689   | 10.9208         | 0          | 1         | 1         |
| Btd              | 1.88109   | 2.23151         | 0          | 1         | 1         |
| Btd_j1           | 1.05684   | 1.21856         | 0          | 1         | 1         |
| D830044D21Rik_j1 | 0.0575196 | 0 -1.79769e+308 |            | 0.0543595 | 1         |

|               |           |           |               |           |           |
|---------------|-----------|-----------|---------------|-----------|-----------|
| GalntI2       | 0.182995  | 0.441578  | 1.27086       | 0.0001127 | 0.0023815 |
| Oxnad1        | 1.76022   | 1.75848   | -0.00142462   | 0.992481  | 0.997846  |
| Ncoa4_j2      | 0.896762  | 0         | -1.79769e+308 | 6.01E-08  | 3.48E-06  |
| Parg_j2       | 2.22545   | 2.2364    | 0             | 1         | 1         |
| Parg          | 4.67581   | 5.11242   | 0             | 1         | 1         |
| Ogdhl_j1      | 4.57757   | 2.83466   | 0             | 1         | 1         |
| Ogdhl_j2      | 3.94301   | 3.82528   | 0             | 1         | 1         |
| Ercc6         | 0.332042  | 0.121124  | -1.45488      | 0.000703  | 0.0107588 |
| Ercc6_j1      | 0.291427  | 0.391888  | 0.427308      | 0.143012  | 0.469978  |
| Ercc6_j10     | 0.278446  | 0.127493  | -1.12698      | 0.0184655 | 0.133443  |
| Prrxl1        | 0.690063  | 0.37673   | 0             | 1         | 1         |
| Prrxl1_j4     | 14.3168   | 8.99962   | 0             | 1         | 1         |
| 1810011H11Rik | 0.146677  | 0.0965504 | -0.603291     | 0.576461  | 0.829016  |
| E130203B14Rik | 1.19832   | 1.12294   | -0.093731     | 0.712433  | 0.895739  |
| Arhgap22_j1   | 1.96907   | 1.77772   | 0             | 1         | 1         |
| Arhgap22_j2   | 0.471052  | 0.59328   | 0             | 1         | 1         |
| Arhgap22_j4   | 0.272503  | 0.0832543 | 0             | 1         | 1         |
| Arhgap22_j6   | 1.19544   | 1.24552   | 0             | 1         | 1         |
| Glud1         | 51.7505   | 50.0917   | -0.0470013    | 0.584559  | 0.833464  |
| XLOC_009629   | 0.0818979 | 2.74E-06  | -14.866       | 0.997661  | 1         |
| XLOC_009629   | 0.0741426 | 0.0947025 | 0.3531        | 0.641391  | 1         |
| Mmrn2         | 1.84151   | 1.49639   | -0.299402     | 0.10303   | 0.397858  |
| XLOC_009631   | 0.12449   | 0.0451875 | 0             | 1         | 1         |
| Wapal         | 1.74848   | 1.66758   | 0             | 1         | 1         |
| Wapal         | 2.57776   | 2.74708   | 0             | 1         | 1         |
| Grid1_j1      | 1.39393   | 0.822882  | -0.760405     | 0.0199179 | 0.140419  |
| Grid1         | 1.77687   | 1.81847   | 0.0333835     | 0.83427   | 0.946759  |
| Gm5057        | 0.336136  | 0.45044   | 0.422292      | 0.36302   | 0.697185  |
| XLOC_009637   | 0.27476   | 0.057429  | -2.25832      | 0.0814314 | 0.347588  |
| Gm8104_j1     | 0.155405  | 0.0793713 | -0.969343     | 0.498842  | 0.784147  |
| Gm8104_j3     | 0.830617  | 0.295007  | -1.49343      | 0.0017384 | 0.0223337 |
| Gm5057_j1     | 0.130699  | 0.148894  | 0.188039      | 0.759397  | 1         |
| Gpr137c       | 4.26408   | 3.72552   | 0             | 1         | 1         |
| Psmc6         | 71.9535   | 70.5166   | -0.0291018    | 0.739727  | 0.908719  |
| Styx_j1       | 0.312408  | 0.34493   | 0.142874      | 0.521055  | 0.798005  |
| Gm6580        | 8.67791   | 8.97268   | 0.0481916     | 0.749128  | 0.912835  |
| Cdkn3_j2      | 1.74379   | 2.43704   | 0.4829        | 0.0004346 | 0.0072352 |
| Samd4         | 0.182287  | 0         | -1.79769e+308 | 2.77E-05  | 0.0007213 |
| Socs4         | 2.40473   | 2.00535   | 0             | 1         | 1         |
| Mapk1ip1l     | 14.8447   | 14.2164   | -0.0623968    | 0.518689  | 0.79652   |
| Lgals3        | 24.0535   | 48.3968   | 1.00866       | 0         | 0         |
| Fbxo34        | 1.37106   | 1.12777   | -0.281817     | 0.283524  | 0.631898  |
| Fbxo34        | 1.27471   | 1.12755   | -0.176976     | 0.509954  | 0.790883  |
| Fbxo34_j4     | 0.0311828 | 0.101918  | 1.70859       | 0.126577  | 1         |
| Ktn1_j6       | 5.77394   | 7.27763   | 0             | 1         | 1         |
| Peli2         | 1.09785   | 0.951598  | 0             | 1         | 1         |
| Peli2_j1      | 2.41759   | 2.35403   | 0             | 1         | 1         |

|                  |           |                 |            |           |           |
|------------------|-----------|-----------------|------------|-----------|-----------|
| 6720456H2ORik_j1 | 0.742902  | 0.584097        | 0          | 1         | 1         |
| 6720456H2ORik    | 1.4933    | 1.12443         | 0          | 1         | 1         |
| Mudeng           | 3.38546   | 3.05705         | -0.147212  | 0.235969  | 0.583297  |
| Naa30            | 10.0568   | 8.7475          | -0.201223  | 0.0536933 | 0.269984  |
| Parp2            | 5.21763   | 5.52988         | 0.0838526  | 0.585535  | 0.833966  |
| Apex1_j2         | 25.8369   | 27.4267         | 0.0861465  | 0.383534  | 0.713056  |
| Pnp              | 0.379486  | 0.449106        | 0.243011   | 0.663637  | 0.872641  |
| Pnp_j4           | 0.763076  | 0.846184        | 0.149144   | 0.762291  | 0.918113  |
| Pnp2             | 4.38804   | 7.63582         | 0.799206   | 0.0003316 | 0.0058027 |
| Rnase4           | 5.15951   | 10.026          | 0          | 1         | 1         |
| Rnase4_j2        | 1.47424   | 4.26285         | 0          | 1         | 1         |
| Mett11d1_j2      | 2.08431   | 2.09105         | 0.00465939 | 0.984402  | 0.995386  |
| Mett11d1_j7      | 0.0362352 | 0.186946        | 2.36716    | 0.050845  | 0.261215  |
| Slc39a2_j3       | 0.191823  | 0.204836        | 0.0946887  | 0.8727    | 0.959723  |
| Slc39a2_j1       | 0.0673823 | 0.189023        | 1.48812    | 0.096611  | 0.383933  |
| Arhgef40_j1      | 0.0957582 | 0.126731        | 0          | 1         | 1         |
| Arhgef40_j5      | 0.981063  | 1.37489         | 0          | 1         | 1         |
| Rpgrip1_j1       | 4.16429   | 5.16288         | 0.310108   | 0.0813536 | 0.347413  |
| Tox4             | 0.338634  | 0.426989        | 0.334469   | 0.191822  | 0.534008  |
| Tcra_j3          | 0.414274  | 0.143231        | -1.53224   | 0.0646869 | 0.302381  |
| Abhd4            | 60.9586   | 54.7136         | -0.15593   | 0.0749547 | 0.330361  |
| Oxa1l_j1         | 18.2032   | 16.9718         | -0.101055  | 0.361333  | 0.695972  |
| Mrpl52           | 14.1574   | 14.2411         | 0.00850033 | 0.951605  | 0.986024  |
| Mmp14            | 2.7906    | 2.23329         | -0.321404  | 0.0773802 | 0.336726  |
| Mmp14_j1         | 8.93633   | 10.5113         | 0.234191   | 0.0384965 | 0.218356  |
| Lrp10            | 14.3162   | 13.4441         | 0          | 1         | 1         |
| Lrp10_j2         | 26.7383   | 27.4381         | 0          | 1         | 1         |
| Rem2             | 9.10972   | 5.23565         | -0.799038  | 2.14E-08  | 1.40E-06  |
| Pabpn1_j6        | 16.2665   | 16.5162         | 0.0219816  | 0.849611  | 0.952228  |
| Cmtm5_j4         | 0.556135  | 0.368855        | -0.59238   | 0.0804909 | 0.345164  |
| Cmtm5_j5         | 0.281787  | 0.269919        | -0.062081  | 0.863576  | 0.956634  |
| Ngdn             | 2.67099   | 3.43868         | 0.364479   | 0.122123  | 0.435216  |
| Ngdn_j3          | 1.08983   | 1.15224         | 0.0803336  | 0.853308  | 0.953525  |
| Dhrs2_j3         | 1.29232   | 0.912874        | -0.501473  | 0.154461  | 0.487639  |
| Cpne6            | 32.8998   | 31.032          | -0.0843229 | 0.384108  | 0.71322   |
| Cpne6_j7         | 1.96655   | 3.82484         | 0.959731   | 1.36E-05  | 0.0004036 |
| Pck2             | 3.73013   | 3.46317         | -0.107136  | 0.408279  | 0.728619  |
| Pck2_j1          | 1.00652   | 0.920648        | -0.128654  | 0.567155  | 0.82484   |
| Dcaf11_j4        | 0.155857  | 0 -1.79769e+308 |            | 0.0047854 | 0.0491023 |
| Dcaf11           | 15.3793   | 14.0392         | -0.131527  | 0.231712  | 0.578797  |
| Psme1            | 3.15768   | 3.18146         | 0.0108258  | 0.936868  | 0.980702  |
| Rnf31_j4         | 2.02957   | 2.08422         | 0          | 1         | 1         |
| Rnf31_j5         | 0.504405  | 0.367262        | 0          | 1         | 1         |
| Rec8             | 0.26154   | 0.1435          | -0.865984  | 0.160238  | 0.494798  |
| Rec8_j2          | 0.163528  | 3.56E-06        | -15.4865   | 0.99683   | 0.999085  |
| Rec8_j3          | 0.0473343 | 0 -1.79769e+308 |            | 0.0782593 | 1         |
| Gmpr2            | 7.44809   | 7.54741         | 0          | 1         | 1         |

|               |           |             |               |           |          |
|---------------|-----------|-------------|---------------|-----------|----------|
| 2610027L16Rik | 2.10415   | 2.64089     | 0             | 1         | 1        |
| Nfatc4_j4     | 0.0662886 | 0           | -1.79769e+308 | 0.0686918 | 1        |
| Nynrin_j1     | 0.137605  | 0.000125975 | -10.0932      | 0.671071  | 0.875594 |
| Khynyn        | 3.34324   | 3.09566     | 0             | 1         | 1        |
| Rnf17_j2      | 0.173328  | 0.0240126   | -2.85164      | 0.220413  | 0.567289 |
| Parp4         | 3.42349   | 3.10635     | 0             | 1         | 1        |
| Parp4_j2      | 2.49085   | 3.3419      | 0             | 1         | 1        |
| Mphosph8      | 10.9968   | 10.6138     | 0             | 1         | 1        |
| Zmym2_j1      | 6.61802   | 4.24205     | 0             | 1         | 1        |
| Zmym2_j2      | 4.40557   | 6.54188     | 0             | 1         | 1        |
| Ift88         | 2.61011   | 2.55804     | -0.029072     | 0.864363  | 0.956828 |
| Mrp63         | 2.91435   | 2.88109     | -0.0165584    | 0.920483  | 0.975139 |
| Fgf9          | 3.8477    | 1.53219     | 0             | 1         | 1        |
| Rcbbt1        | 7.05979   | 5.85072     | 0             | 1         | 1        |
| Rcbbt1_j3     | 0.54283   | 0.396753    | 0             | 1         | 1        |
| Cab39l        | 18.9614   | 17.3895     | 0             | 1         | 1        |
| Cab39l        | 27.8885   | 27.2022     | 0             | 1         | 1        |
| Shisa2        | 0.951181  | 0.890827    | -0.0945739    | 0.72448   | 0.901947 |
| Mtmr6_j3      | 4.48179   | 2.27065     | 0             | 1         | 1        |
| Mtmr6         | 59.6592   | 41.1552     | 0             | 1         | 1        |
| Fam123a       | 1.61205   | 2.2193      | 0             | 1         | 1        |
| Spata13       | 10.7846   | 7.90261     | 0             | 1         | 1        |
| Spata13_j5    | 1.29532   | 0.598246    | 0             | 1         | 1        |
| Mipep         | 3.41763   | 3.06077     | -0.159105     | 0.242472  | 0.589952 |
| Sacs_j2       | 0.125158  | 0           | -1.79769e+308 | 2.66E-12  | 1        |
| Sacs_j1       | 0.350824  | 0.320766    | -0.129225     | 0.594623  | 0.838568 |
| Arl11         | 0.123582  | 0.273089    | 1.14391       | 0.10132   | 0.394191 |
| Trim13        | 2.42301   | 3.03961     | 0.327086      | 0.120074  | 0.431402 |
| Rnaseh2b_j2   | 6.4675    | 6.93763     | 0.101236      | 0.56985   | 0.826046 |
| AK200207_j2   | 1.46108   | 1.91047     | 0.386889      | 0.0609679 | 0.291265 |
| AK200207_j1   | 2.60319   | 4.66236     | 0.84078       | 4.23E-07  | 1.92E-05 |
| Wdfy2_j3      | 0.331006  | 0.165077    | 0             | 1         | 1        |
| Wdfy2_j5      | 1.52326   | 1.03602     | 0             | 1         | 1        |
| Defb42        | 1.55468   | 1.06104     | -0.551138     | 0.0809652 | 0.346426 |
| Defb42_j1     | 2.61423   | 2.02946     | -0.365288     | 0.0487558 | 0.254425 |
| Ctsb          | 6.82405   | 7.80745     | 0             | 1         | 1        |
| Ctsb_j2       | 211.453   | 253.217     | 0             | 1         | 1        |
| Fam167a       | 0.835693  | 0.483156    | 0             | 1         | 1        |
| Fam167a_j1    | 0.345283  | 0.473175    | 0             | 1         | 1        |
| Fam167a_j2    | 1.00484   | 1.08151     | 0             | 1         | 1        |
| Fam167a_j3    | 1.27156   | 1.21481     | 0             | 1         | 1        |
| Xkr6_j1       | 0.835662  | 0.766885    | -0.123908     | 0.725174  | 0.902421 |
| Xkr6          | 0.28964   | 0.430375    | 0.571332      | 0.15654   | 0.490077 |
| Pinx1         | 1.41747   | 1.71761     | 0.277092      | 0.235415  | 0.582636 |
| Sox7          | 0.450659  | 0.996254    | 1.14448       | 2.66E-07  | 1.28E-05 |
| AK044422_j1   | 0.0578562 | 0.026561    | -1.12316      | 0.678768  | 1        |
| Kif13b_j2     | 1.99812   | 1.85316     | 0             | 1         | 1        |

|             |           |                 |           |           |           |
|-------------|-----------|-----------------|-----------|-----------|-----------|
| Kif13b_j4   | 1.03079   | 1.1271          | 0         | 1         | 1         |
| Kif13b_j5   | 6.07911   | 8.36201         | 0         | 1         | 1         |
| Ints9       | 9.32618   | 9.29004         | 0         | 1         | 1         |
| Fbxo16_j1   | 0.777594  | 0.939353        | 0.272651  | 0.488222  | 0.778737  |
| Fbxo16      | 0.504886  | 0.644093        | 0.351313  | 0.228621  | 0.575633  |
| Fbxo16_j2   | 0.379243  | 0.310829        | -0.287    | 0.459319  | 0.761406  |
| Fbxo16      | 0.214808  | 0.219032        | 0.0280933 | 0.953665  | 0.98654   |
| Zfp395_j3   | 0.156203  | 0 -1.79769e+308 |           | 1.65E-05  | 0.0004734 |
| Zfp395_j2   | 0.222371  | 1.44E-05        | -13.9175  | 0.970983  | 0.991858  |
| Scara5_j2   | 0.116424  | 0 -1.79769e+308 |           | 0.000432  | 1         |
| Scara5      | 0.557556  | 1.16308         | 1.06076   | 1.24E-06  | 4.96E-05  |
| Scara5_j1   | 0.111791  | 0 -1.79769e+308 |           | 0.000553  | 1         |
| Ccdc25      | 0.068764  | 0.079567        | 0.210517  | 0.701137  | 1         |
| Clu         | 35.1247   | 27.8534         | -0.334634 | 0.0011213 | 0.0156694 |
| Clu_j6      | 214.232   | 191.374         | -0.162778 | 0.0601013 | 0.288687  |
| Trim35      | 3.86345   | 4.2746          | 0         | 1         | 1         |
| Trim35_j3   | 23.4623   | 24.9479         | 0         | 1         | 1         |
| Stmn4       | 0.539982  | 0.625777        | 0.212738  | 0.739561  | 0.908646  |
| Stmn4       | 13.1205   | 39.5652         | 1.59241   | 0         | 0         |
| Adra1a_j1   | 0.0726734 | 0.194222        | 1.41821   | 0.0493979 | 0.256438  |
| Pnma2_j1    | 10.3332   | 8.82287         | 0         | 1         | 1         |
| Kctd9       | 31.4124   | 25.3133         | -0.311439 | 0.0008214 | 0.0122257 |
| Kctd9_j4    | 1.54475   | 0.74094         | -1.05994  | 0.0322881 | 0.195009  |
| Gnrh1_j1    | 0.0480554 | 0.239825        | 2.31921   | 0.0040435 | 0.0432478 |
| Entpd4_j6   | 48.2829   | 47.0841         | -0.036272 | 0.684269  | 0.881982  |
| Loxl2       | 0.742797  | 1.76015         | 1.24466   | 1.70E-10  | 1.64E-08  |
| Loxl2       | 1.14079   | 4.55164         | 1.99635   | 0         | 0         |
| AK133329_j4 | 0.0821672 | 0 -1.79769e+308 |           | 0.0045738 | 1         |
| AK133329_j5 | 0.0860625 | 0 -1.79769e+308 |           | 0.0036925 | 1         |
| Bin3        | 1.53461   | 1.58291         | 0.0447091 | 0.728191  | 0.903669  |
| Phyhip      | 1.10081   | 0.664739        | -0.727712 | 0.0185742 | 0.13395   |
| Lgi3        | 3.7212    | 2.13478         | -0.80168  | 1.21E-06  | 4.86E-05  |
| Lgi3_j2     | 27.4379   | 13.9222         | -0.978786 | 2.18E-11  | 2.50E-09  |
| Reep4       | 2.64424   | 3.26398         | 0.303777  | 0.139908  | 0.465344  |
| Reep4_j1    | 1.32617   | 1.77454         | 0.420179  | 0.128432  | 0.446733  |
| Hr_j1       | 4.74175   | 7.8608          | 0.729255  | 1.07E-11  | 1.30E-09  |
| Nudt18      | 10.6891   | 10.7417         | 0.0070851 | 0.949208  | 0.985343  |
| Dok2        | 0.0531007 | 0.104431        | 0.975741  | 0.378843  | 1         |
| Dok2_j4     | 0.241848  | 0.0771977       | -1.64747  | 0.0785293 | 0.339822  |
| XLOC_009792 | 0.144809  | 0.0654782       | -1.14506  | 0.423653  | 0.739059  |
| XLOC_009792 | 0.0841005 | 0.0426397       | -0.979918 | 0.438836  | 1         |
| Gfra2       | 26.7283   | 18.6069         | 0         | 1         | 1         |
| Gfra2_j5    | 1.32728   | 0               | 0         | 1         | 1         |
| Rcbtb2_j1   | 2.94776   | 2.54106         | 0         | 1         | 1         |
| Med4        | 0.138213  | 0.0815007       | -0.762004 | 0.298016  | 0.644621  |
| Med4_j3     | 1.0978    | 0.614531        | -0.837054 | 0.0032722 | 0.0369523 |
| Sucla2      | 108.947   | 95.4115         | -0.191395 | 0.025941  | 0.168724  |



|                  |           |                 |             |           |           |
|------------------|-----------|-----------------|-------------|-----------|-----------|
| Htr2a            | 1.64854   | 1.35261         | -0.285442   | 0.122112  | 0.435216  |
| Esd              | 13.9878   | 17.9276         | 0           | 1         | 1         |
| Esd_j2           | 22.9442   | 37.5023         | 0           | 1         | 1         |
| Esd_j3           | 1.10658   | 2.07638         | 0           | 1         | 1         |
| Lcp1_j2          | 12.5654   | 8.66735         | 0           | 1         | 1         |
| Zc3h13_j2        | 0.0540343 | 0.0326019       | 0           | 1         | 1         |
| Zc3h13           | 2.4651    | 1.48499         | 0           | 1         | 1         |
| Zc3h13_j3        | 0.475745  | 0.349069        | 0           | 1         | 1         |
| Siah3            | 3.71759   | 2.16524         | 0           | 1         | 1         |
| XLOC_009810      | 0.149277  | 0.148427        | -0.00823303 | 0.990265  | 0.997044  |
| Nufip1           | 6.38334   | 7.35191         | 0.203808    | 0.141232  | 0.467373  |
| Tsc22d1_j2       | 1.94059   | 4.83116         | 1.31587     | 8.88E-16  | 1.98E-13  |
| Tsc22d1          | 165.024   | 191.806         | 0.216969    | 0.0117343 | 0.09649   |
| Enox1_j8         | 3.44405   | 1.86084         | 0           | 1         | 1         |
| Epsti1           | 0.373058  | 0.845103        | 1.17973     | 0.0001922 | 0.0037123 |
| Mtrf1            | 3.62735   | 3.51212         | -0.0465727  | 0.781583  | 0.926309  |
| Kbtbd7           | 5.00426   | 4.20906         | -0.249657   | 0.0377725 | 0.215754  |
| Elf1_j1          | 0.909491  | 1.05326         | 0           | 1         | 1         |
| Sugt1            | 13.5079   | 11.7482         | -0.201358   | 0.0271259 | 0.173951  |
| Pcdh17           | 3.38417   | 3.68887         | 0.124376    | 0.2491    | 0.59657   |
| Tdrd3            | 0.272832  | 0.290626        | 0.0911498   | 0.773275  | 0.923105  |
| Tdrd3_j3         | 0.198411  | 0.239582        | 0.272024    | 0.652313  | 0.86677   |
| Tdrd3_j5         | 0.0600855 | 0.0141756       | -2.08361    | 0.269013  | 1         |
| 6720463M24Rik    | 0.164812  | 0.0649757       | -1.34285    | 0.0179063 | 0.130485  |
| Pibf1            | 1.74203   | 1.56335         | -0.156137   | 0.413521  | 0.732302  |
| Klf5             | 2.78533   | 1.98769         | -0.486759   | 0.0126021 | 0.101805  |
| Uchl3_j1         | 0.404714  | 0.330884        | -0.290575   | 0.728917  | 0.903872  |
| Uchl3_j3         | 0.215193  | 0.315093        | 0.550146    | 0.570416  | 0.826291  |
| Uchl3_j5         | 4.12503   | 2.39537         | -0.784154   | 0.0036354 | 0.0401066 |
| Lmo7_j1          | 0.062931  | 0 -1.79769e+308 |             | 0.0043249 | 1         |
| Lmo7_j5          | 1.00706   | 3.81072         | 1.91991     | 0         | 0         |
| Lmo7_j10         | 0.147419  | 1.62641         | 3.46369     | 0         | 0         |
| Cln5             | 12.9792   | 14.9885         | 0.207659    | 0.0506809 | 0.260729  |
| XLOC_009838      | 0.366558  | 0 -1.79769e+308 |             | 8.63E-10  | 7.32E-08  |
| XLOC_009838      | 0.0948747 | 0.165541        | 0.803093    | 0.282387  | 0.630923  |
| AK079958_j1      | 0.189447  | 0.0795597       | -1.25168    | 0.130295  | 0.449403  |
| Scel_j1          | 0.134442  | 0.0707126       | -0.926948   | 0.294252  | 1         |
| Scel_j3          | 0.148961  | 0 -1.79769e+308 |             | 0.0003911 | 0.0066528 |
| Slain1           | 1.20669   | 1.26302         | 0.0658196   | 0.780175  | 0.925824  |
| AK043219_j1      | 0.124643  | 0.0926635       | -0.427731   | 0.633412  | 1         |
| D130009I18Rik_j4 | 4.59066   | 3.098           | -0.567365   | 0.0089562 | 0.0788679 |
| D130009I18Rik_j5 | 2.27028   | 1.7275          | -0.394181   | 0.0258859 | 0.168478  |
| Ndfip2           | 50.074    | 39.9552         | 0           | 1         | 1         |
| FJ744746_j5      | 0.129312  | 0.0886083       | -0.545347   | 0.701385  | 1         |
| XLOC_009849      | 0.148483  | 0.0405837       | -1.87132    | 0.106216  | 0.404647  |
| Slitrk5_j1       | 0.914881  | 0.572375        | 0           | 1         | 1         |
| Slitrk5_j2       | 2.5367    | 1.33207         | 0           | 1         | 1         |

|                  |           |                        |            |           |           |
|------------------|-----------|------------------------|------------|-----------|-----------|
| Tpm3-rs7         | 7.8649    | 9.66657                | 0.297577   | 0.0146734 | 0.113118  |
| Mir17hg          | 0.521891  | 0.53536                | 0.0367622  | 0.897947  | 0.967557  |
| Gpc5_j1          | 2.01004   | 1.77901                | -0.17615   | 0.416857  | 0.733932  |
| Gpc6             | 0.222073  | 0.286421               | 0.367104   | 0.297804  | 0.644392  |
| Gpc6             | 0.258417  | 0 -1.79769e+308        |            | 1.22E-12  | 1.72E-10  |
| Gpc6_j3          | 0.562966  | 0.343474               | -0.712848  | 0.0479316 | 0.25166   |
| Gpr180           | 6.58323   | 6.49869                | 0          | 1         | 1         |
| Gpr180           | 3.49723   | 2.12652                | 0          | 1         | 1         |
| Dnajc3           | 2.76376   | 2.34407                | -0.237612  | 0.0519644 | 0.264512  |
| Mbnl2_j2         | 8.51037   | 1.56534                | -2.44274   | 0         | 0         |
| Rap2a            | 19.4174   | 20.3497                | 0.0676589  | 0.464211  | 0.764606  |
| Ipo5             | 27.143    | 31.927                 | 0.234196   | 0.0080889 | 0.0731966 |
| XLOC_009865      | 0.103947  | 0.0469576              | -1.14641   | 0.275783  | 1         |
| Farp1_j1         | 1.43846   | 1.32274                | -0.120986  | 0.484308  | 0.776337  |
| Ubac2            | 13.7633   | 12.9697                | -0.0856832 | 0.438572  | 0.748203  |
| Tm9sf2_j1        | 0.231191  | 0                      | 0          | 1         | 1         |
| Clybl_j1         | 2.71936   | 2.74809                | 0.0151621  | 0.958432  | 0.988063  |
| Clybl            | 11.8056   | 11.6618                | -0.0176784 | 0.89803   | 0.967557  |
| Pcca             | 7.32215   | 7.20652                | -0.0229657 | 0.852528  | 0.953272  |
| Dnase1l3_j2      | 1.20225   | 1.02123                | -0.235435  | 0.358028  | 0.693676  |
| Pdhb             | 1.35892   | 1.18025                | -0.203375  | 0.177058  | 0.516175  |
| Fam107a          | 1.28548   | 1.40448                | 0.127732   | 0.547904  | 0.813901  |
| 4930452B06Rik_j1 | 1.95836   | 1.62262                | 0          | 1         | 1         |
| 4930452B06Rik    | 2.0531    | 1.70665                | 0          | 1         | 1         |
| Fhit_j2          | 0.416726  | 0 -1.79769e+308        |            | 0.0099428 | 0.0853151 |
| Fhit_j7          | 0         | 0.0567515 1.79769e+308 |            | 0.206967  | 1         |
| Cadps_j1         | 24.4081   | 19.2809                | 0          | 1         | 1         |
| Cadps_j13        | 12.1393   | 9.53595                | 0          | 1         | 1         |
| Cadps_j11        | 9.68958   | 3.74912                | 0          | 1         | 1         |
| Thoc7_j3         | 4.75977   | 3.21536                | 0          | 1         | 1         |
| Thoc7            | 10.3119   | 10.4913                | 0          | 1         | 1         |
| Psm6             | 61.7488   | 64.3862                | 0.0603409  | 0.516972  | 0.795313  |
| Lrrc3b_j1        | 4.7796    | 0                      | 0          | 1         | 1         |
| Lrrc3b           | 0.882612  | 2.5891                 | 0          | 1         | 1         |
| Lrrc3b_j2        | 0.868579  | 1.84534                | 0          | 1         | 1         |
| Lrrc3b           | 1.51377   | 1.33267                | 0          | 1         | 1         |
| Oxsm             | 0.312293  | 0.52349                | 0.74526    | 0.0735296 | 0.326799  |
| Rarb             | 0.653115  | 0.575821               | 0          | 1         | 1         |
| XLOC_009893      | 0.19766   | 0.04805                | -2.04041   | 0.265988  | 0.615069  |
| XLOC_009893      | 0.0884838 | 0.0672492              | -0.395897  | 0.713204  | 1         |
| Ube2e1           | 12.7552   | 11.8404                | -0.107375  | 0.281715  | 0.630261  |
| Ube2e2           | 36.4038   | 33.7047                | -0.111138  | 0.277678  | 0.626549  |
| 2700060E02Rik_j1 | 0.145605  | 0.0429799              | -1.76033   | 0.0384814 | 0.218296  |
| Gng2_j1          | 7.37649   | 6.45655                | -0.19217   | 0.167013  | 0.503276  |
| Gng2             | 5.62791   | 3.87119                | -0.539823  | 0.0003966 | 0.0067278 |
| 1810063B07Rik    | 4.20907   | 4.95338                | 0.23491    | 0.245355  | 0.592815  |
| Kcnk5_j2         | 0.454481  | 0.274268               | -0.728635  | 0.152216  | 0.483673  |

|               |           |                      |             |           |           |
|---------------|-----------|----------------------|-------------|-----------|-----------|
| Kcnk5         | 0.980861  | 0.871155             | -0.171119   | 0.49991   | 0.784898  |
| Kcnk16_j1     | 0.641987  | 1.35782              | 0           | 1         | 1         |
| Ecd           | 12.4924   | 13.0154              | 0.0591704   | 0.55431   | 0.817472  |
| Dnajc9        | 1.64137   | 1.34994              | -0.282012   | 0.146365  | 0.474658  |
| Mrps16_j3     | 1.05668   | 1.13351              | 0.101261    | 0.846582  | 0.951509  |
| Mrps16        | 3.62587   | 3.81295              | 0.0725809   | 0.760005  | 0.917326  |
| Ttc18_j4      | 0.0510294 | 0 -1.79769e+308      |             | 0.0158356 | 1         |
| Ttc18_j10     | 0.188692  | 0.113083             | -0.738656   | 0.438336  | 0.748123  |
| Anxa7         | 14.7709   | 15.6411              | 0           | 1         | 1         |
| Anxa7_j2      | 4.60909   | 4.14049              | 0           | 1         | 1         |
| Anxa7_j3      | 14.5287   | 13.6967              | 0           | 1         | 1         |
| Ppp3cb        | 7.61586   | 8.21217              | 0           | 1         | 1         |
| Ppp3cb_j4     | 13.2807   | 9.14226              | 0           | 1         | 1         |
| Ndst2_j2      | 0.79831   | 0.447042             | 0           | 1         | 1         |
| Ndst2_j1      | 0.380159  | 0.0383269            | 0           | 1         | 1         |
| Camk2g_j8     | 0.293517  | 0.0658473            | 0           | 1         | 1         |
| Camk2g_j1     | 55.8732   | 43.6385              | 0           | 1         | 1         |
| Ap3m1_j6      | 0         | 0.27846 1.79769e+308 |             | 0.028568  | 0.179787  |
| Ap3m1_j9      | 6.10887   | 6.57055              | 0.105111    | 0.723412  | 0.90149   |
| Comtd1_j2     | 8.61212   | 9.26091              | 0           | 1         | 1         |
| Zfp503_j1     | 0.29422   | 0.369383             | 0.328224    | 0.359966  | 0.695038  |
| Kcnma1_j1     | 0.190845  | 0.118816             | 0           | 1         | 1         |
| Kcnma1        | 0.708987  | 0.481167             | 0           | 1         | 1         |
| Kcnma1_j3     | 0.15997   | 0.201847             | 0           | 1         | 1         |
| Dlg5_j5       | 0.642891  | 0.22586              | 0           | 1         | 1         |
| Dlg5          | 1.93529   | 2.59185              | 0           | 1         | 1         |
| Polr3a        | 0.935579  | 0.83484              | 0           | 1         | 1         |
| Zcchc24_j1    | 0.128032  | 0                    | 0           | 1         | 1         |
| Zcchc24       | 3.25586   | 3.15521              | 0           | 1         | 1         |
| D14Ert449e_j3 | 6.29349   | 6.28457              | -0.00204536 | 0.992901  | 0.997939  |
| Plac9         | 6.43092   | 9.33295              | 0.537309    | 0.0022111 | 0.0270083 |
| D14Ert449e    | 21.662    | 22.5436              | 0.0575528   | 0.628773  | 0.855636  |
| Slmap_j1      | 4.01774   | 2.56961              | 0           | 1         | 1         |
| Slmap_j2      | 0.739146  | 0.878247             | 0           | 1         | 1         |
| Pde12         | 2.40991   | 2.3136               | -0.0588428  | 0.625138  | 0.853774  |
| Appl1_j1      | 0.0604172 | 0.117607             | 0           | 1         | 1         |
| Appl1         | 3.8481    | 3.3874               | 0           | 1         | 1         |
| Ccdc66_j2     | 0.0875242 | 0.0345357            | -1.34159    | 0.164365  | 1         |
| Cacna2d3_j2   | 7.28672   | 5.50386              | 0           | 1         | 1         |
| Cacna2d3_j1   | 5.63753   | 4.30703              | 0           | 1         | 1         |
| Cacna2d3_j3   | 10.8898   | 9.69967              | 0           | 1         | 1         |
| Cacna1d_j1    | 0.17397   | 0.226427             | 0           | 1         | 1         |
| Cacna1d_j2    | 0.263354  | 0.0669653            | 0           | 1         | 1         |
| Cacna1d_j3    | 0.288343  | 0.183662             | 0           | 1         | 1         |
| Prkcd_j2      | 5.597     | 2.75696              | 0           | 1         | 1         |
| Prkcd         | 18.4809   | 17.2174              | 0           | 1         | 1         |
| Spcs1         | 52.5024   | 52.2382              | 0           | 1         | 1         |

|               |           |                 |            |           |           |
|---------------|-----------|-----------------|------------|-----------|-----------|
| Gnl3          | 7.3144    | 7.72414         | 0          | 1         | 1         |
| 2010107H07Rik | 8.97657   | 8.45143         | 0          | 1         | 1         |
| 2010107H07Rik | 0.700111  | 0.761811        | 0          | 1         | 1         |
| Stab1_j3      | 0.133617  | 0.110396        | -0.275414  | 0.707542  | 1         |
| Stab1_j6      | 0.814648  | 1.32756         | 0.704532   | 2.83E-05  | 0.0007359 |
| Phf7_j2       | 0.170167  | 0 -1.79769e+308 | 0.0009748  | 0.0140043 |           |
| Phf7          | 0.774121  | 0.88783         | 0.197725   | 0.535708  | 0.80631   |
| Phf7          | 0.432068  | 0.318595        | -0.439538  | 0.389982  | 0.717083  |
| Dnahc1_j3     | 0.0709321 | 0.035323        | -1.00583   | 0.44549   | 1         |
| Sh3bp5        | 0.94158   | 0.876043        | 0          | 1         | 1         |
| Colq_j1       | 0.0879158 | 0 -1.79769e+308 | 0.009948   | 1         | 1         |
| Colq          | 1.27068   | 0.533425        | -1.25224   | 3.81E-05  | 0.0009473 |
| Hacl1_j2      | 0.417255  | 0.240814        | 0          | 1         | 1         |
| Ankrd28_j1    | 1.05178   | 0.868772        | 0          | 1         | 1         |
| Ankrd28_j2    | 0.101488  | 0               | 0          | 1         | 1         |
| Dph3          | 8.88086   | 8.31381         | -0.0951897 | 0.406601  | 0.727764  |
| Wdfy4_j5      | 0.15984   | 0.130018        | -0.297919  | 0.671922  | 0.876137  |
| Wdfy4_j6      | 0.0575456 | 0.00289619      | -4.31248   | 0.496688  | 1         |
| Mapk8_j1      | 6.66777   | 5.51025         | 0          | 1         | 1         |
| Mapk8         | 3.56809   | 3.28561         | 0          | 1         | 1         |
| Mapk8         | 2.87731   | 4.3403          | 0          | 1         | 1         |
| AK041587_j2   | 0.551143  | 2.53523         | 2.20162    | 1.87E-07  | 9.29E-06  |
| Gprin2        | 0.557059  | 0.552725        | -0.0112687 | 0.957414  | 0.987843  |
| Gprin2_j1     | 0.283531  | 0.0905775       | -1.64628   | 0.0002396 | 0.0044524 |
| Fam35a_j2     | 0.193712  | 0.117138        | -0.725709  | 0.0907848 | 0.370321  |
| Fam35a_j5     | 0.131217  | 0.0386998       | -1.76156   | 0.0355211 | 1         |
| Sncg          | 1091.93   | 1208.98         | 0.146912   | 0.119629  | 0.43047   |
| Bmpr1a_j3     | 5.56021   | 5.72881         | 0          | 1         | 1         |
| Bmpr1a_j1     | 2.9818    | 2.33016         | 0          | 1         | 1         |
| Bmpr1a        | 5.69017   | 4.57852         | 0          | 1         | 1         |
| Ldb3_j2       | 0.342801  | 0.219515        | 0          | 1         | 1         |
| Ldb3          | 1.51509   | 1.06312         | 0          | 1         | 1         |
| Opn4_j2       | 0.179177  | 0.150439        | -0.252202  | 0.758723  | 0.917041  |
| Gcap14_j6     | 1.5077    | 0.76032         | 0          | 1         | 1         |
| Gcap14_j7     | 1.44212   | 1.70175         | 0          | 1         | 1         |
| Gcap14_j1     | 25.6819   | 20.1588         | 0          | 1         | 1         |
| Cdhr1_j1      | 6.85337   | 11.1632         | 0          | 1         | 1         |
| Cdhr1         | 4.13325   | 5.20235         | 0          | 1         | 1         |
| Ghitm_j2      | 44.245    | 47.7129         | 0          | 1         | 1         |
| Ghitm_j1      | 19.0608   | 14.3637         | 0          | 1         | 1         |
| Ghitm         | 40.6464   | 34.6895         | 0          | 1         | 1         |
| Ghitm         | 140.639   | 118.022         | 0          | 1         | 1         |
| Nrg3_j7       | 1.71012   | 1.51823         | -0.171707  | 0.292502  | 0.639479  |
| Nrg3_j5       | 1.35714   | 1.23949         | -0.130828  | 0.474264  | 0.770621  |
| Nrg3_j4       | 0.874045  | 0.877886        | 0.00632491 | 0.976625  | 0.993228  |
| Nrg3_j10      | 0.109231  | 0.163178        | 0.57906    | 0.606708  | 0.845067  |
| Nrg3_j12      | 0.239015  | 0.168719        | -0.502484  | 0.627013  | 0.854469  |

|                  |           |           |               |           |           |
|------------------|-----------|-----------|---------------|-----------|-----------|
| Tspan14_j1       | 10.9585   | 9.49421   | 0             | 1         | 1         |
| Tspan14          | 9.31251   | 8.41536   | 0             | 1         | 1         |
| 5730469M10Rik    | 7.13737   | 7.87307   | 0             | 1         | 1         |
| 5730469M10Rik    | 10.7121   | 10.8676   | 0             | 1         | 1         |
| Dydc2_j2         | 0.505115  | 0.461567  | -0.130071     | 0.750464  | 0.913412  |
| Dydc2_j1         | 0.235454  | 0.434124  | 0.882661      | 0.0940809 | 0.377895  |
| Dydc2_j3         | 0.0911733 | 0         | -1.79769e+308 | 0.0146121 | 1         |
| Ptgdr            | 8.14983   | 6.42509   | -0.343054     | 0.0016308 | 0.0211735 |
| Txndc16_j2       | 0.206549  | 0.0718375 | -1.52367      | 0.0367482 | 0.212043  |
| Txndc16_j3       | 0         | 0.074548  | 1.79769e+308  | 0.0141463 | 1         |
| Ero1l_j2         | 6.074     | 5.79556   | 0             | 1         | 1         |
| Fermt2           | 11.9532   | 9.7919    | 0             | 1         | 1         |
| Fermt2_j1        | 1.3575    | 0.70566   | 0             | 1         | 1         |
| Ddhd1_j6         | 1.21449   | 1.25732   | 0.050003      | 0.820007  | 0.941743  |
| Ddhd1_j8         | 0.08672   | 0.152684  | 0.816117      | 0.0719606 | 1         |
| Ddhd1_j7         | 1.72929   | 1.27455   | -0.440192     | 0.0546103 | 0.272543  |
| XLOC_009985      | 0.129864  | 0.0442678 | -1.55268      | 0.298629  | 1         |
| Cnih_j3          | 0.169586  | 0         | -1.79769e+308 | 0.0227065 | 0.153825  |
| Gmfb             | 11.8244   | 12.1756   | 0             | 1         | 1         |
| Gch1             | 1.57029   | 2.39466   | 0.608785      | 0.0005526 | 0.0088727 |
| Wdhd1_j6         | 0.314318  | 0.056951  | -2.46443      | 0.0529893 | 0.267688  |
| Wdhd1_j7         | 1.01193   | 1.01545   | 0.00500735    | 0.980993  | 0.994152  |
| Dlgap5_j1        | 0.162486  | 0.215645  | 0.408339      | 0.548866  | 0.814457  |
| Atg14_j1         | 0.0620667 | 0.0471566 | 0             | 1         | 1         |
| Atg14            | 2.71435   | 2.6162    | 0             | 1         | 1         |
| XLOC_009998      | 0.143435  | 0.165655  | 0.207786      | 0.775154  | 0.923761  |
| Gm6055           | 169.008   | 195.914   | 0.213127      | 0.0159881 | 0.120341  |
| Exoc5_j4         | 16.8569   | 18.5087   | 0.134859      | 0.195864  | 0.538405  |
| Exoc5            | 0.51372   | 0         | -1.79769e+308 | 8.91E-30  | 2.95E-27  |
| Exoc5_j6         | 3.85388   | 5.64881   | 0.551637      | 0.0053596 | 0.0534634 |
| Slc35f4          | 0.948253  | 0.539105  | -0.814706     | 0.0488603 | 0.25467   |
| Slc35f4_j4       | 0.0658634 | 0         | -1.79769e+308 | 0.100058  | 1         |
| 3632451O06Rik    | 1.596     | 2.11841   | 0             | 1         | 1         |
| 3632451O06Rik_j7 | 0.083223  | 0.0839582 | 0             | 1         | 1         |
| Ttc5_j1          | 0.424313  | 0.525279  | 0.307956      | 0.347004  | 0.68578   |
| Ttc5_j5          | 3.0061    | 3.47858   | 0.210606      | 0.318452  | 0.661834  |
| Tep1_j2          | 3.05485   | 3.11029   | 0.0259482     | 0.828698  | 0.944654  |
| Tep1             | 0.510156  | 0.464871  | -0.134107     | 0.486634  | 0.777737  |
| Klhl33           | 0.0607225 | 0.137639  | 1.18058       | 0.253668  | 1         |
| Klhl33_j2        | 1.50712   | 0.929458  | -0.697333     | 0.0008453 | 0.0125194 |
| Osgep_j2         | 0.692632  | 0.880546  | 0.34631       | 0.21172   | 0.556588  |
| Ndrj2_j6         | 1.78922   | 0         | 0             | 1         | 1         |
| Ndrj2            | 13.2981   | 12.9356   | 0             | 1         | 1         |
| Ndrj2            | 10.7163   | 15.2777   | 0             | 1         | 1         |
| Hnrnpc_j3        | 6.10696   | 8.87147   | 0             | 1         | 1         |
| Hnrnpc           | 13.318    | 13.1977   | 0             | 1         | 1         |
| Chd8_j12         | 0.0698419 | 0         | -1.79769e+308 | 2.88E-05  | 1         |

|               |           |           |            |           |           |
|---------------|-----------|-----------|------------|-----------|-----------|
| Rab2b         | 0.198853  | 0.106352  | -0.902855  | 0.254437  | 0.602729  |
| Mettl3        | 7.83476   | 8.8063    | 0.168646   | 0.102364  | 0.396414  |
| Sall2         | 2.23714   | 0.977712  | 0          | 1         | 1         |
| Dad1          | 77.3392   | 79.5057   | 0.0398602  | 0.660289  | 0.871049  |
| Slc7a7_j1     | 13.1672   | 13.4104   | 0.0264022  | 0.79505   | 0.931579  |
| Prmt5         | 11.9802   | 11.0537   | 0          | 1         | 1         |
| Haus4_j1      | 0.381779  | 0.200686  | -0.927798  | 0.136947  | 0.460133  |
| Haus4         | 1.6944    | 1.21744   | -0.476928  | 0.0913953 | 0.371609  |
| Jub_j2        | 0.208294  | 0.103996  | -1.00209   | 0.319883  | 0.66333   |
| Jub           | 0.12045   | 0.148455  | 0.301593   | 0.701515  | 1         |
| Jub           | 0.435345  | 0.553443  | 0.346277   | 0.23294   | 0.580163  |
| 4931414P19Rik | 0.839773  | 0.830981  | -0.0151844 | 0.956384  | 0.987617  |
| Psm5          | 37.1062   | 37.487    | 0          | 1         | 1         |
| Cdh24_j2      | 0.363661  | 0.142578  | -1.35085   | 0.0258264 | 0.168201  |
| Acin1_j5      | 6.77671   | 6.96357   | 0          | 1         | 1         |
| Acin1_j6      | 0.0742732 | 0         | 0          | 1         | 1         |
| Cebpe_j1      | 0.196024  | 0.120836  | -0.697986  | 0.235842  | 0.583098  |
| Slc7a8        | 4.76935   | 5.1468    | 0          | 1         | 1         |
| Homez         | 0.850752  | 0.67379   | -0.336439  | 0.164488  | 0.500522  |
| Ppp1r3e       | 0.651339  | 0.698982  | 0.101848   | 0.708707  | 0.893844  |
| Slc22a17_j1   | 0.133379  | 0.0904853 | 0          | 1         | 1         |
| Slc22a17_j5   | 0.0764764 | 0.101771  | 0          | 1         | 1         |
| Efs           | 2.57792   | 2.92847   | 0.183939   | 0.20723   | 0.551728  |
| Zfhx2_j3      | 0.417322  | 0.191429  | 0          | 1         | 1         |
| Jph4          | 26.5879   | 23.6345   | 0          | 1         | 1         |
| Fam158a       | 35.2599   | 32.6691   | -0.110103  | 0.285216  | 0.633988  |
| Ipo4_j1       | 7.46601   | 7.17637   | 0          | 1         | 1         |
| Ipo4_j2       | 2.54005   | 2.94178   | 0          | 1         | 1         |
| Mdp1          | 9.736     | 8.25989   | 0          | 1         | 1         |
| Mdp1_j1       | 5.85065   | 7.44663   | 0          | 1         | 1         |
| Nedd8_j4      | 57.0109   | 66.494    | 0          | 1         | 1         |
| Rabggta       | 12.5023   | 13.3626   | 0.0960138  | 0.399049  | 0.722657  |
| Dhrs1_j3      | 1.20595   | 1.51254   | 0          | 1         | 1         |
| Dhrs1         | 0.118446  | 0.038631  | 0          | 1         | 1         |
| Sdr39u1       | 1.47041   | 1.44399   | 0          | 1         | 1         |
| Cma1          | 0.170958  | 0.569996  | 1.73731    | 0.0002889 | 0.0051804 |
| Ube2j2        | 12.8826   | 12.6944   | -0.0212302 | 0.886193  | 0.963821  |
| Cenpj_j2      | 0.220226  | 0.18633   | -0.241121  | 0.622393  | 0.852322  |
| Cenpj_j3      | 0.611592  | 0.857625  | 0.487779   | 0.0512928 | 0.26237   |
| Cenpj_j1      | 0.638352  | 0.443673  | -0.524857  | 0.0769173 | 0.335371  |
| Pspc1         | 5.63376   | 4.53799   | 0          | 1         | 1         |
| Zmym5_j11     | 0.321283  | 0         | 0          | 1         | 1         |
| Zmym5_j13     | 0.811244  | 0.642143  | 0          | 1         | 1         |
| Zmym5_j14     | 0         | 0.399233  | 0          | 1         | 1         |
| Gjb2          | 0.578753  | 0.597101  | 0.0450276  | 0.867417  | 0.95814   |
| Cryl1         | 5.5875    | 5.9958    | 0.101751   | 0.517103  | 0.795422  |
| N6amt2_j1     | 12.1007   | 14.2058   | 0.231387   | 0.137826  | 0.461663  |

|                  |           |           |            |           |           |
|------------------|-----------|-----------|------------|-----------|-----------|
| N6amt2           | 4.64417   | 3.62374   | -0.357942  | 0.187735  | 0.528826  |
| Xpo4_j1          | 2.30158   | 2.21383   | -0.0560809 | 0.725555  | 0.902457  |
| Xpo4_j6          | 0.173425  | 0.0445136 | -1.96199   | 0.108724  | 0.410095  |
| Lats2_j4         | 2.10583   | 2.06017   | 0          | 1         | 1         |
| Lats2            | 1.73363   | 1.21833   | 0          | 1         | 1         |
| F630043A04Rik    | 0.195295  | 0.127106  | -0.619627  | 0.0912941 | 0.371341  |
| Zdhhc20_j4       | 1.11359   | 1.36087   | 0          | 1         | 1         |
| Zdhhc20          | 4.22492   | 4.59008   | 0          | 1         | 1         |
| Efha1            | 8.71735   | 10.1961   | 0.226059   | 0.0477676 | 0.251144  |
| Phf11_j1         | 0.20085   | 0.163959  | -0.292786  | 0.686427  | 0.883186  |
| Gm4902_j1        | 0.484684  | 0.161494  | -1.58557   | 0.0710284 | 0.320446  |
| Setdb2_j4        | 0.299031  | 0.131706  | -1.18297   | 0.0377135 | 0.215545  |
| Setdb2           | 0.47684   | 0.312104  | -0.611481  | 0.0631196 | 0.297779  |
| Cdad1            | 14.8078   | 14.6089   | 0          | 1         | 1         |
| Atp8a2_j1        | 7.9532    | 1.62281   | 0          | 1         | 1         |
| Atp8a2_j2        | 1.688     | 1.0112    | 0          | 1         | 1         |
| Atp8a2_j3        | 12.4233   | 7.06669   | 0          | 1         | 1         |
| Nupl1            | 13.4922   | 12.9405   | -0.0602358 | 0.54573   | 0.812617  |
| Tnfrsf19         | 0.515514  | 0.459915  | -0.164645  | 0.588219  | 0.835413  |
| Ebpl             | 11.1727   | 11.555    | 0.0485345  | 0.761497  | 0.917949  |
| Kpna3_j3         | 0.147418  | 0.0389293 | 0          | 1         | 1         |
| Kpna3            | 9.84464   | 9.21536   | 0          | 1         | 1         |
| 6330409N04Rik_j1 | 33.7784   | 29.7462   | -0.183393  | 0.069229  | 0.315454  |
| 6330409N04Rik    | 5.21823   | 4.41208   | -0.242101  | 0.0449133 | 0.242234  |
| Ints6_j4         | 0         | 0.0520651 | 0          | 1         | 1         |
| Ints6_j5         | 0.156499  | 0.259638  | 0          | 1         | 1         |
| Fdft1_j3         | 48.1782   | 48.7563   | 0          | 1         | 1         |
| Neil2_j2         | 0.502319  | 0.454301  | -0.144954  | 0.749586  | 0.913026  |
| Neil2_j1         | 0.154472  | 0.189376  | 0.293906   | 0.727358  | 0.903478  |
| Mttr9_j2         | 2.06003   | 0.745458  | -1.46646   | 1.36E-10  | 1.35E-08  |
| Msra_j6          | 4.03498   | 4.5346    | 0          | 1         | 1         |
| Msra             | 3.55045   | 3.7475    | 0          | 1         | 1         |
| Hmbox1_j6        | 8.6418    | 7.72564   | 0          | 1         | 1         |
| Hmbox1_j7        | 1.50559   | 2.01176   | 0          | 1         | 1         |
| Hmbox1_j8        | 15.7822   | 17.7522   | 0          | 1         | 1         |
| Hmbox1_j9        | 12.9722   | 14.1232   | 0          | 1         | 1         |
| Extl3_j1         | 0.0625745 | 0.0810642 | 0          | 1         | 1         |
| Extl3_j2         | 0.20859   | 0.172839  | 0          | 1         | 1         |
| Fzd3             | 3.15091   | 2.49035   | -0.339418  | 0.0020677 | 0.0256449 |
| Pnoc             | 0.326513  | 0.247663  | -0.39876   | 0.527822  | 0.801757  |
| Elp3             | 24.6473   | 20.6114   | 0          | 1         | 1         |
| Scara3           | 1.06791   | 1.65856   | 0.635147   | 0.0027478 | 0.0321689 |
| Scara3_j1        | 1.13281   | 0.81185   | -0.480615  | 0.0842323 | 0.354161  |
| Ephx2_j1         | 0.595714  | 0.647474  | 0.120202   | 0.826998  | 0.94428   |
| Ephx2            | 1.53976   | 1.23066   | -0.323268  | 0.18746   | 0.528387  |
| Ptk2b_j1         | 6.42413   | 4.49807   | 0          | 1         | 1         |
| Dpysl2_j5        | 58.6998   | 59.4942   | 0.0193928  | 0.823838  | 0.943114  |

|                  |           |           |             |           |           |
|------------------|-----------|-----------|-------------|-----------|-----------|
| Dpysl2           | 5.76631   | 4.36553   | -0.401492   | 0.0018632 | 0.0236255 |
| Ppp2r2d_j1       | 2.22055   | 2.56808   | 0.209772    | 0.410844  | 0.730497  |
| Ppp2r2a          | 24.631    | 26.386    | 0.0992953   | 0.315865  | 0.659833  |
| Cdca2_j1         | 0.102407  | 0.0115835 | -3.14418    | 0.238114  | 1         |
| Dock5_j2         | 1.21395   | 1.76497   | 0           | 1         | 1         |
| Dock5            | 4.30404   | 3.69389   | 0           | 1         | 1         |
| Nefm             | 1.03896   | 1.01601   | -0.0322284  | 0.86112   | 0.956083  |
| Slc25a37         | 1.44308   | 1.28418   | 0           | 1         | 1         |
| Slc25a37_j4      | 0.444314  | 0.515847  | 0           | 1         | 1         |
| R3hcc1           | 6.67073   | 7.73574   | 0           | 1         | 1         |
| Chmp7            | 25.7488   | 29.0861   | 0           | 1         | 1         |
| Rhobtb2_j1       | 5.63116   | 3.72333   | 0           | 1         | 1         |
| Rhobtb2          | 6.35826   | 4.54453   | 0           | 1         | 1         |
| 2610301G19Rik_j4 | 1.84235   | 1.55487   | -0.244752   | 0.372704  | 0.705702  |
| 9930012K11Rik    | 0.243539  | 0.585585  | 1.26572     | 0.0123466 | 0.100256  |
| 9930012K11Rik_j1 | 0.556081  | 0.238158  | -1.22338    | 0.0247358 | 0.163072  |
| 9930012K11Rik    | 0.633999  | 0.47504   | -0.416432   | 0.317598  | 0.660897  |
| Pdlim2_j2        | 17.5176   | 19.5867   | 0.161068    | 0.249304  | 0.596796  |
| Sorbs3_j2        | 0.584286  | 0.238809  | 0           | 1         | 1         |
| Sorbs3           | 3.20716   | 3.2751    | 0           | 1         | 1         |
| Ppp3cc           | 13.2134   | 12.126    | 0           | 1         | 1         |
| Slc39a14_j4      | 0.695269  | 0.76155   | 0           | 1         | 1         |
| Slc39a14         | 1.35958   | 1.07629   | 0           | 1         | 1         |
| Piwil2_j2        | 0.221298  | 0.303114  | 0.453874    | 0.441769  | 0.750327  |
| Polr3d           | 3.3986    | 3.92619   | 0           | 1         | 1         |
| Bmp1_j3          | 0.342255  | 0         | 0           | 1         | 1         |
| Fam160b2         | 0.546294  | 0.86519   | 0           | 1         | 1         |
| Epb4.9_j4        | 0.406989  | 0         | 0           | 1         | 1         |
| Epb4.9_j6        | 0.1088    | 0.107254  | 0           | 1         | 1         |
| Npm2_j3          | 0.0918194 | 0.0461164 | -0.993519   | 0.366865  | 1         |
| Xpo7             | 7.64784   | 6.97876   | 0           | 1         | 1         |
| Xpo7_j1          | 1.80122   | 1.74461   | 0           | 1         | 1         |
| Fndc3a_j1        | 1.52294   | 0.802414  | 0           | 1         | 1         |
| Fndc3a           | 1.70938   | 1.72966   | 0           | 1         | 1         |
| Cysltr2_j1       | 0.56409   | 1.50637   | 1.41708     | 3.61E-10  | 3.27E-08  |
| Cysltr2_j2       | 1.50378   | 1.72245   | 0.19587     | 0.558811  | 0.82019   |
| Rb1_j2           | 2.87701   | 3.25022   | 0           | 1         | 1         |
| Rb1              | 4.34791   | 4.03068   | 0           | 1         | 1         |
| Itm2b            | 372.37    | 371.553   | -0.00317221 | 0.971422  | 0.991962  |
| Lrch1            | 1.45255   | 1.33113   | 0           | 1         | 1         |
| Lrch1_j3         | 1.24018   | 1.06486   | 0           | 1         | 1         |
| Cog3_j1          | 5.69163   | 5.06984   | 0           | 1         | 1         |
| Cog3             | 4.0663    | 2.91773   | 0           | 1         | 1         |
| Slc25a30_j2      | 0.14589   | 0.105826  | -0.463186   | 0.576422  | 0.829009  |
| Slc25a30         | 9.17988   | 8.29527   | -0.146187   | 0.206022  | 0.550518  |
| Gtf2f2           | 7.26494   | 7.31615   | 0.0101343   | 0.945327  | 0.983703  |
| 1200011I18Rik    | 7.38919   | 6.98111   | -0.0819592  | 0.43332   | 0.744727  |



|                  |           |                 |            |           |           |
|------------------|-----------|-----------------|------------|-----------|-----------|
| Serp2            | 29.4256   | 29.746          | 0.0156282  | 0.902062  | 0.968734  |
| 9030625A04Rik_j2 | 1.08436   | 0.953348        | -0.185767  | 0.53171   | 0.803676  |
| 9030625A04Rik_j1 | 0.578686  | 0.386549        | -0.58213   | 0.231283  | 0.578377  |
| 9030625A04Rik    | 2.2901    | 2.32988         | 0.0248433  | 0.900207  | 0.968284  |
| Dnajc15          | 4.01189   | 3.53123         | 0          | 1         | 1         |
| Akap11_j1        | 4.10697   | 1.46308         | 0          | 1         | 1         |
| Akap11_j3        | 1.58137   | 1.75776         | 0          | 1         | 1         |
| Akap11_j2        | 7.9098    | 4.33662         | 0          | 1         | 1         |
| Akap11           | 2.45203   | 0.0014285       | 0          | 1         | 1         |
| Dgkh_j1          | 17.0773   | 10.9378         | 0          | 1         | 1         |
| Dgkh             | 0.051204  | 0.0151474       | 0          | 1         | 1         |
| Dgkh_j2          | 16.8877   | 12.5984         | 0          | 1         | 1         |
| 1190002H23Rik_j1 | 15.896    | 15.3249         | -0.052785  | 0.801496  | 0.933853  |
| 1190002H23Rik    | 8.89484   | 13.1229         | 0.56105    | 0.0008339 | 0.012393  |
| 1190002H23Rik_j2 | 9.22393   | 8.40636         | -0.1339    | 0.626231  | 0.854124  |
| Naa16_j5         | 0.0686277 | 0.246222        | 1.8431     | 0.0470258 | 0.248626  |
| Naa16_j4         | 0.36616   | 0.631177        | 0.785571   | 0.0094513 | 0.0821531 |
| Naa16            | 0.34892   | 0 -1.79769e+308 |            | 1.57E-11  | 1.84E-09  |
| Wbp4             | 8.78021   | 7.78939         | -0.172745  | 0.128546  | 0.446769  |
| Lect1            | 2.6314    | 2.55996         | 0          | 1         | 1         |
| Lect1_j1         | 0.248688  | 0.340109        | 0          | 1         | 1         |
| Pcdh8            | 0.894308  | 0.822828        | -0.120181  | 0.646854  | 0.863936  |
| Pcdh8            | 1.26051   | 0.720393        | -0.807157  | 0.0014172 | 0.0188742 |
| XLOC_010150      | 0.156915  | 0.0933331       | -0.749524  | 0.592929  | 0.83794   |
| Diap3_j2         | 1.06699   | 1.47836         | 0.47045    | 0.14439   | 0.471579  |
| Diap3_j1         | 0.902432  | 0.131295        | -2.781     | 0.0035989 | 0.0398023 |
| Diap3_j3         | 0.174107  | 0.0479067       | -1.86167   | 0.393626  | 0.719597  |
| Diap3_j4         | 0.42985   | 0.314159        | -0.452339  | 0.491678  | 0.780573  |
| Gm10119          | 137.962   | 157.31          | 0.189344   | 0.0309846 | 0.189775  |
| Pcdh9_j1         | 9.4537    | 7.86866         | -0.264761  | 0.348508  | 0.686685  |
| Pcdh9_j2         | 1.00824   | 0.838009        | -0.266806  | 0.723606  | 0.901555  |
| Pcdh9_j4         | 1.14585   | 0.545982        | -1.0695    | 0.163338  | 0.49864   |
| Dach1_j1         | 0.206351  | 0.0527714       | -1.96727   | 0.0892994 | 0.366337  |
| Dach1            | 0.240282  | 0.0826382       | -1.53985   | 0.0166996 | 0.124219  |
| Dach1            | 0.720691  | 0.461678        | -0.642495  | 0.0289537 | 0.181278  |
| Mzt1             | 17.4687   | 14.7094         | -0.248034  | 0.0150028 | 0.115003  |
| Dis3             | 0.463398  | 0.402027        | -0.204962  | 0.426125  | 0.740933  |
| Dis3_j3          | 0.927687  | 0.994841        | 0.100827   | 0.696382  | 0.888069  |
| Klf12_j7         | 0.24966   | 0.137596        | -0.859534  | 0.0261263 | 0.169612  |
| Tbc1d4_j1        | 0.96162   | 0.389394        | 0          | 1         | 1         |
| Tbc1d4_j2        | 0.516431  | 0.13576         | 0          | 1         | 1         |
| Commd6           | 2.12309   | 2.60043         | 0.292586   | 0.191473  | 0.533645  |
| Commd6           | 6.39248   | 6.02874         | -0.0845194 | 0.560131  | 0.821025  |
| Fbxl3            | 8.36757   | 6.82496         | 0          | 1         | 1         |
| Fbxl3            | 2.61381   | 2.07658         | 0          | 1         | 1         |
| Fbxl3_j2         | 2.31935   | 1.81913         | 0          | 1         | 1         |
| Mycbp2_j4        | 19.9134   | 18.7699         | -0.0853164 | 0.338291  | 0.678713  |

|                  |           |                 |            |           |          |
|------------------|-----------|-----------------|------------|-----------|----------|
| Mycbp2_j11       | 0.922805  | 1.12302         | 0.283284   | 0.069559  | 0.316277 |
| Ednrb            | 22.264    | 20.9963         | 0          | 1         | 1        |
| Pou4f1_j2        | 37.4832   | 35.7591         | 0          | 1         | 1        |
| Rbm26_j1         | 2.64986   | 2.37614         | 0          | 1         | 1        |
| Rbm26_j6         | 1.07112   | 0.885643        | 0          | 1         | 1        |
| XLOC_010170      | 0.117165  | 0.134556        | 0          | 1         | 1        |
| Spry2            | 7.09576   | 6.57542         | -0.109875  | 0.419473  | 0.736117 |
| Slitrk1          | 5.06347   | 3.92222         | 0          | 1         | 1        |
| XLOC_010177      | 0.175624  | 0.130138        | -0.432443  | 0.633214  | 0.857492 |
| Tgds_j1          | 0.145226  | 0 -1.79769e+308 |            | 0.0203179 | 0.142415 |
| Tgds_j3          | 0.123168  | 0.0522502       | -1.23711   | 0.390119  | 1        |
| Tgds_j2          | 0.155163  | 0.159842        | 0.0428549  | 0.962459  | 0.989507 |
| Tgds             | 1.19469   | 1.36201         | 0.1891     | 0.503201  | 0.78696  |
| Abcc4_j6         | 0.392262  | 0.332214        | 0          | 1         | 1        |
| Abcc4            | 0.878273  | 0.729686        | 0          | 1         | 1        |
| Dzip1_j1         | 1.36037   | 1.26177         | 0          | 1         | 1        |
| Dzip1_j12        | 0.252946  | 0.300638        | 0          | 1         | 1        |
| Dzip1_j9         | 0.0587469 | 0.0311521       | 0          | 1         | 1        |
| Uggt2            | 0.0615783 | 0.0369643       | -0.73629   | 0.241273  | 1        |
| XLOC_010184      | 0.21127   | 0.0768689       | -1.45862   | 0.116279  | 0.424336 |
| Stk24_j5         | 17.6802   | 17.1543         | 0          | 1         | 1        |
| Stk24_j1         | 4.54862   | 2.21553         | 0          | 1         | 1        |
| Slc15a1_j1       | 0.138965  | 0.0766356       | -0.858631  | 0.530102  | 0.802942 |
| Dock9_j12        | 0.121899  | 0 -1.79769e+308 |            | 8.81E-07  | 1        |
| Dock9_j13        | 0.229292  | 0.114607        | -1.0005    | 0.0424256 | 0.232811 |
| Dock9_j14        | 0.473069  | 0.0671702       | -2.81616   | 1.51E-06  | 5.92E-05 |
| A2ld1            | 14.3868   | 11.7942         | 0          | 1         | 1        |
| a2ld1_j1         | 13.7694   | 12.1294         | 0          | 1         | 1        |
| Tmtc4_j3         | 0.797898  | 1.29827         | 0          | 1         | 1        |
| Nalcn            | 1.10545   | 7.37E-05        | -13.8732   | 0.741693  | 0.909396 |
| Nalcn_j1         | 0.0705788 | 0 -1.79769e+308 |            | 0.0003799 | 1        |
| Flnb_j8          | 5.79575   | 8.57422         | 0          | 1         | 1        |
| Kctd6            | 3.18318   | 2.59257         | -0.296088  | 0.164074  | 0.499855 |
| Kctd6_j5         | 1.22004   | 1.15788         | -0.0754484 | 0.781778  | 0.926329 |
| Ptprg_j1         | 2.91088   | 2.8315          | 0          | 1         | 1        |
| 3830406C13Rik_j3 | 1.62755   | 1.36969         | -0.248853  | 0.381923  | 0.712127 |
| 3830406C13Rik_j5 | 0.882149  | 0.572072        | -0.624827  | 0.111941  | 0.416333 |
| Synpr_j6         | 1.91788   | 0.242268        | -2.98483   | 2.24E-06  | 8.42E-05 |
| XLOC_009550      | 1.48958   | 2.27932         | 0.613695   | 0.105963  | 0.404152 |
| Il3ra_j4         | 0.0829637 | 0.171527        | 1.04789    | 0.247279  | 0.594858 |
| Il3ra_j2         | 0.229485  | 0.174171        | -0.397893  | 0.637012  | 0.859465 |
| AK080648_j3      | 0.0701009 | 0.138278        | 0          | 1         | 1        |
| AK080648_j4      | 0.061666  | 0               | 0          | 1         | 1        |
| Top2b_j4         | 3.77713   | 4.71549         | 0          | 1         | 1        |
| Nid2_j2          | 1.36544   | 0.89467         | -0.609939  | 0.0167788 | 0.124626 |
| Nid2_j3          | 1.55153   | 1.7108          | 0.140982   | 0.359892  | 0.695038 |
| Nudt13_j3        | 0.964483  | 1.67329         | 0          | 1         | 1        |

|                  |           |           |              |           |           |
|------------------|-----------|-----------|--------------|-----------|-----------|
| Nudt13_j4        | 0.828997  | 0.717205  | 0            | 1         | 1         |
| Nudt13_j5        | 1.2785    | 1.49136   | 0            | 1         | 1         |
| Fam149b_j2       | 2.43631   | 2.56582   | 0.0747203    | 0.709186  | 0.894136  |
| Fam149b_j3       | 1.08024   | 0.792818  | -0.446293    | 0.230699  | 0.577701  |
| Sec24c_j5        | 6.68377   | 6.40123   | -0.0623122   | 0.584328  | 0.833405  |
| Sec24c_j12       | 2.86052   | 4.79066   | 0.743945     | 5.64E-06  | 0.0001879 |
| Chchd1           | 9.14892   | 10.2292   | 0.161015     | 0.235603  | 0.582812  |
| 2310021P13Rik_j2 | 5.50087   | 5.08362   | 0            | 1         | 1         |
| 2310021P13Rik_j6 | 10.0067   | 11.0703   | 0            | 1         | 1         |
| Vcl_j3           | 0.873454  | 1.77255   | 0            | 1         | 1         |
| Adk_j2           | 0.818986  | 0.527402  | -0.634938    | 0.285598  | 0.634449  |
| Myst4_j7         | 0         | 0.107627  | 0            | 1         | 1         |
| Vdac2_j2         | 4.5585    | 4.71704   | 0            | 1         | 1         |
| 1700112E06Rik_j5 | 0.161885  | 0.247851  | 0.614503     | 0.615981  | 0.848633  |
| XLOC_009576      | 0.606318  | 0.627448  | 0.0494204    | 0.911922  | 0.972279  |
| Rps24_j5         | 0         | 2.05094   | 0            | 1         | 1         |
| Zmiz1_j2         | 0.166315  | 0.155852  | -0.0937381   | 0.857948  | 0.954916  |
| Fam116a          | 3.44273   | 2.53766   | 0            | 1         | 1         |
| XLOC_009585      | 0.0573922 | 0.0732286 | 0.351551     | 0.809895  | 1         |
| Arhgef3          | 2.07332   | 1.59472   | 0            | 1         | 1         |
| Erc2_j5          | 1.44705   | 0.394791  | 0            | 1         | 1         |
| Erc2_j4          | 1.0873    | 2.01625   | 0            | 1         | 1         |
| Erc2_j10         | 0.637875  | 0.846552  | 0            | 1         | 1         |
| Selk_j1          | 0.810067  | 0.651537  | -0.314193    | 0.432896  | 0.74455   |
| Actr8_j2         | 0.190608  | 0.213924  | 0.166485     | 0.740981  | 0.909195  |
| Chdh_j3          | 0.266001  | 0.206577  | 0            | 1         | 1         |
| Tkt_j5           | 0.386446  | 0.368945  | 0            | 1         | 1         |
| Tmem110          | 0.846093  | 1.09298   | 0.369384     | 0.129429  | 0.448367  |
| Tmem110_j4       | 4.75675   | 4.85245   | 0.0287354    | 0.833563  | 0.946371  |
| Glt8d1           | 1.49959   | 2.84163   | 0            | 1         | 1         |
| Pbrm1_j8         | 2.44936   | 1.94787   | 0            | 1         | 1         |
| Pbrm1_j9         | 7.71312   | 8.12594   | 0            | 1         | 1         |
| Nt5dc2_j2        | 0.420358  | 0.533842  | 0.344796     | 0.210463  | 0.55502   |
| XLOC_009610      | 0.306664  | 0.446975  | 0.543533     | 0.104464  | 0.401025  |
| Ercc6_j5         | 0.223251  | 0.207445  | -0.105938    | 0.915541  | 0.973645  |
| Prrxl1_j3        | 30.3392   | 32.2713   | 0            | 1         | 1         |
| XLOC_009619      | 0.249891  | 0.13387   | -0.900461    | 0.159857  | 0.494363  |
| Arhgap22_j3      | 4.28232   | 7.2801    | 0            | 1         | 1         |
| Arhgap22_j5      | 1.7562    | 2.56251   | 0            | 1         | 1         |
| Glud1_j2         | 0.0707077 | 0.0590742 | -0.259338    | 0.862695  | 1         |
| Glud1_j1         | 0         | 0.0967728 | 1.79769e+308 | 0.0556932 | 1         |
| Mmrn2_j2         | 0         | 0.194003  | 1.79769e+308 | 0.0005596 | 0.0089557 |
| Ptger2           | 0.517876  | 0.54815   | 0.0819648    | 0.770634  | 0.922024  |
| XLOC_009649      | 0.116806  | 0.131352  | 0.169328     | 0.792681  | 1         |
| Cdkn3_j1         | 0.302345  | 0.768954  | 1.3467       | 0.003701  | 0.0406303 |
| Cgrrf1           | 7.62415   | 7.29121   | -0.0644173   | 0.671994  | 0.876138  |
| Cgrrf1_j1        | 2.77371   | 2.99706   | 0.111734     | 0.771469  | 0.922331  |

|                  |           |            |               |           |           |
|------------------|-----------|------------|---------------|-----------|-----------|
| Samd4_j2         | 0         | 0.110047   | 1.79769e+308  | 0.0128014 | 1         |
| Fbxo34_j2        | 0         | 0.0925091  | 1.79769e+308  | 0.022511  | 1         |
| Fbxo34_j3        | 1.25648   | 0.592295   | -1.085        | 0.0024146 | 0.0290595 |
| Ktn1_j5          | 2.24154   | 2.71731    | 0             | 1         | 1         |
| Ktn1_j4          | 2.07441   | 3.53222    | 0             | 1         | 1         |
| Ktn1_j9          | 3.2508    | 5.39694    | 0             | 1         | 1         |
| 6720456H20Rik_j4 | 8.75E-05  | 0.242514   | 0             | 1         | 1         |
| Apex1_j1         | 0         | 0.0813951  | 1.79769e+308  | 0.0644721 | 1         |
| Rnase4_j1        | 1.36856   | 0          | 0             | 1         | 1         |
| Mett11d1_j1      | 0.2125    | 0.540097   | 1.34575       | 0.0156231 | 0.118199  |
| Mett11d1         | 0.472537  | 0.524148   | 0.149547      | 0.769591  | 0.921491  |
| Slc39a2          | 0.0916973 | 0.178923   | 0.964391      | 0.245022  | 0.592452  |
| Arhgef40_j3      | 4.55737   | 5.35349    | 0             | 1         | 1         |
| Arhgef40         | 2.68805   | 3.93388    | 0             | 1         | 1         |
| Arhgef40_j8      | 0.681398  | 1.13891    | 0             | 1         | 1         |
| Tox4_j2          | 0.203038  | 0.112889   | -0.846851     | 1         | 1         |
| Tcrd             | 0.0261939 | 0.102158   | 1.9635        | 0.535587  | 1         |
| Tcra_j1          | 0         | 0.0931088  | 1.79769e+308  | 0.0847873 | 1         |
| Bcl2l2_j1        | 46.9054   | 42.231     | -0.151451     | 0.0827108 | 0.350562  |
| Pabpn1_j5        | 0.137852  | 0          | -1.79769e+308 | 0.0129074 | 0.103541  |
| Cmtm5_j3         | 0.238684  | 0.190465   | -0.325577     | 0.782964  | 0.92681   |
| Dhrs2_j2         | 1.58282   | 1.65912    | 0.0679213     | 0.820007  | 0.941743  |
| Lrrc16b_j3       | 0.739416  | 0.61849    | 0             | 1         | 1         |
| Cpne6_j4         | 0.0363619 | 0.0553679  | 0.606624      | 0.683471  | 1         |
| Cpne6_j8         | 7.92692   | 9.99379    | 0.334271      | 0.0310706 | 0.190042  |
| Pck2_j2          | 19.0162   | 19.6113    | 0.0444552     | 0.68746   | 0.883849  |
| Dcaf11_j7        | 13.7688   | 15.6667    | 0.186291      | 0.179842  | 0.519509  |
| Rnf31_j2         | 2.55521   | 2.80193    | 0             | 1         | 1         |
| Rec8_j5          | 4.42E-05  | 0.157632   | 11.7996       | 0.980709  | 0.994152  |
| Rec8_j6          | 0.0806036 | 0          | -1.79769e+308 | 0.191308  | 1         |
| Nynrin_j3        | 0.230255  | 0.159272   | -0.531743     | 0.291787  | 0.638689  |
| Mphosph8_j3      | 3.2539    | 4.85657    | 0             | 1         | 1         |
| Fgf9_j3          | 2.07337   | 1.16129    | 0             | 1         | 1         |
| Fgf9             | 1.48425   | 1.07422    | 0             | 1         | 1         |
| Cab39l_j1        | 0.258105  | 0.197828   | 0             | 1         | 1         |
| Mttr6_j2         | 23.5047   | 24.999     | 0             | 1         | 1         |
| Mttr6_j1         | 52.7573   | 48.7278    | 0             | 1         | 1         |
| Spata13_j3       | 10.5582   | 15.9584    | 0             | 1         | 1         |
| XLOC_009739      | 0.0848508 | 0.0946755  | 0.158063      | 0.828678  | 1         |
| Rnaseh2b         | 1.37895   | 1.84797    | 0.422368      | 0.158792  | 0.49326   |
| Serpine3_j2      | 0.065606  | 0.00897933 | 0             | 1         | 1         |
| Serpine3_j3      | 0         | 0.135159   | 0             | 1         | 1         |
| Wdfy2            | 2.27332   | 1.98672    | 0             | 1         | 1         |
| Ctsb_j3          | 50.4097   | 49.3084    | 0             | 1         | 1         |
| Kif13b_j3        | 0         | 0.727652   | 0             | 1         | 1         |
| Kif13b_j7        | 2.38843   | 2.26541    | 0             | 1         | 1         |
| Zfp395           | 0.543459  | 0.211457   | -1.3618       | 0.0023991 | 0.0288938 |

|                  |           |           |               |           |           |
|------------------|-----------|-----------|---------------|-----------|-----------|
| Stmn4_j2         | 1.77658   | 7.52729   | 2.08303       | 1.03E-12  | 1.46E-10  |
| Pnma2            | 6.48024   | 6.77417   | 0             | 1         | 1         |
| Entpd4_j4        | 0.282799  | 0.288871  | 0.0306496     | 0.932477  | 0.97953   |
| Tnfrsf10b        | 0.118804  | 0.173786  | 0.548735      | 0.614213  | 0.847685  |
| Egr3             | 0.984372  | 1.26948   | 0             | 1         | 1         |
| Egr3_j1          | 1.57158   | 1.84221   | 0             | 1         | 1         |
| Bin3_j1          | 14.3835   | 15.2608   | 0.0854155     | 0.573067  | 0.827416  |
| XLOC_009784      | 0.0375218 | 0.0706816 | 0.913605      | 0.466604  | 1         |
| Lgi3_j1          | 20.0273   | 10.5372   | -0.926481     | 7.01E-11  | 7.36E-09  |
| Hr_j2            | 0.263175  | 0.412739  | 0.649207      | 0.0782627 | 0.339143  |
| Dok2_j2          | 0         | 0.0542941 | 1.79769e+308  | 0.126192  | 1         |
| Gfra2_j2         | 0         | 0.970924  | 0             | 1         | 1         |
| XLOC_009794      | 0.0189669 | 0.0478112 | 1.33387       | 0.668027  | 1         |
| Rcctb2           | 3.2343    | 3.00981   | 0             | 1         | 1         |
| Esd_j1           | 1.74446   | 1.82419   | 0             | 1         | 1         |
| Esd              | 0         | 4.05615   | 0             | 1         | 1         |
| 5031414D18Rik_j1 | 0.0572582 | 0         | -1.79769e+308 | 0.0005144 | 1         |
| 5031414D18Rik_j3 | 0.563982  | 0.643928  | 0.191251      | 0.50989   | 0.790859  |
| Lcp1_j1          | 5.81264   | 4.31488   | 0             | 1         | 1         |
| Tsc22d1_j1       | 24.1663   | 20.3758   | -0.246144     | 0.0094673 | 0.0822634 |
| Enox1_j10        | 2.62061   | 2.32865   | 0             | 1         | 1         |
| 1300010F03Rik    | 8.43271   | 7.01549   | -0.265452     | 0.0078342 | 0.0714627 |
| 1300010F03Rik_j3 | 0.419706  | 0         | -1.79769e+308 | 1.86E-06  | 7.10E-05  |
| Elf1             | 4.23456   | 3.02768   | 0             | 1         | 1         |
| Tdrd3            | 1.47252   | 1.45351   | -0.0187517    | 0.943959  | 0.983288  |
| Tdrd3_j1         | 0.400924  | 0.439396  | 0.132193      | 0.712039  | 0.895567  |
| Tdrd3_j2         | 0.573596  | 0.695953  | 0.278956      | 0.458082  | 0.7608    |
| 6720463M24Rik_j3 | 0.34003   | 0.418006  | 0.297861      | 0.481694  | 0.775249  |
| Pibf1_j1         | 1.0442    | 1.30924   | 0.326336      | 0.224455  | 0.571576  |
| Pibf1_j2         | 0.0969125 | 0.019259  | -2.33115      | 0.190131  | 1         |
| Uchl3_j4         | 0.327161  | 0.460036  | 0.491746      | 0.441011  | 0.749878  |
| Lmo7_j11         | 0.494398  | 1.96469   | 1.99056       | 4.44E-16  | 1.02E-13  |
| XLOC_009838      | 0.394796  | 0.291817  | -0.436044     | 0.48249   | 0.775667  |
| Scel_j4          | 0         | 0.139809  | 1.79769e+308  | 0.075383  | 1         |
| Scel_j8          | 0.0886437 | 0.0727312 | -0.285444     | 0.809686  | 1         |
| XLOC_009842      | 0.0467343 | 0.0677522 | 0.535785      | 0.635481  | 1         |
| Ndfip2_j2        | 16.2426   | 17.3041   | 0             | 1         | 1         |
| Ndfip2_j4        | 16.4031   | 19.4301   | 0             | 1         | 1         |
| AK166274         | 0.223219  | 0.184029  | -0.278527     | 0.786522  | 0.928645  |
| FJ744746_j4      | 0.0410021 | 0.156437  | 1.93181       | 0.285184  | 1         |
| FJ744746_j7      | 0.0736346 | 0         | -1.79769e+308 | 0.157978  | 1         |
| Slitrk5          | 3.61154   | 4.75989   | 0             | 1         | 1         |
| XLOC_009851      | 0.207009  | 0.286343  | 0             | 1         | 1         |
| XLOC_009851      | 0.117557  | 0.126062  | 0             | 1         | 1         |
| Gpc5_j3          | 0.298172  | 0.0890668 | -1.74319      | 0.0763393 | 0.333806  |
| Gpc6_j1          | 0.517056  | 0.396336  | -0.383596     | 0.4047    | 0.726779  |
| AK147121_j7      | 0.154426  | 0.199566  | 0.36995       | 0.487606  | 0.77841   |

|                  |           |           |               |           |           |
|------------------|-----------|-----------|---------------|-----------|-----------|
| Mbnl2            | 7.8163    | 7.26039   | -0.106439     | 0.509825  | 0.790859  |
| Mbnl2_j3         | 19.663    | 18.9154   | -0.0559208    | 0.627914  | 0.855065  |
| Mbnl2_j7         | 47.8952   | 39.5651   | -0.275651     | 0.0054233 | 0.0539947 |
| Farp1_j3         | 2.23104   | 2.54393   | 0.189342      | 0.244652  | 0.592233  |
| Farp1_j2         | 0         | 0.6507    | 1.79769e+308  | 2.76E-09  | 2.13E-07  |
| Tm9sf2           | 0.323839  | 0.219364  | 0             | 1         | 1         |
| Tm9sf2_j3        | 47.5331   | 39.3535   | 0             | 1         | 1         |
| Zic2             | 4.07E-05  | 0.253881  | 12.6054       | 0.954208  | 0.98677   |
| Itgbl1           | 0.14789   | 0.0616555 | -1.26223      | 0.0271938 | 0.174221  |
| AK041589_j4      | 0.0703311 | 0.0733976 | 0.0615701     | 0.975991  | 1         |
| Pdhb_j1          | 45.8667   | 41.5167   | -0.143754     | 0.14251   | 0.469152  |
| XLOC_009882      | 0.0526216 | 0.106579  | 1.0182        | 0.638384  | 1         |
| 4930452B06Rik_j3 | 1.24647   | 0.749961  | 0             | 1         | 1         |
| Fhit_j1          | 4.99374   | 7.22715   | 0.533306      | 0.0116275 | 0.09579   |
| Cadps_j4         | 0         | 2.07211   | 0             | 1         | 1         |
| Cadps_j2         | 30.0101   | 21.0209   | 0             | 1         | 1         |
| Cadps_j3         | 5.95763   | 7.9217    | 0             | 1         | 1         |
| Oxsm_j1          | 0.812332  | 0.288926  | -1.49137      | 0.0006312 | 0.0098863 |
| Nr1d2_j3         | 0.027325  | 0.160327  | 0             | 1         | 1         |
| Nr1d2            | 4.52374   | 2.83514   | 0             | 1         | 1         |
| Rpl15_j2         | 0.0366966 | 0.125354  | 1.77229       | 0.0630576 | 1         |
| Ube2e2_j1        | 12.4029   | 11.9689   | -0.0513884    | 0.781875  | 0.926329  |
| 2700060E02Rik_j3 | 0.300323  | 0.468682  | 0.642092      | 0.0892886 | 0.366337  |
| Gng2_j3          | 72.1849   | 82.7305   | 0.196723      | 0.0221998 | 0.151467  |
| Mrps16_j1        | 2.98049   | 2.75764   | -0.112113     | 0.75305   | 0.914675  |
| Anxa7            | 0.110776  | 0.0233677 | 0             | 1         | 1         |
| Ppp3cb_j1        | 8.29038   | 5.75578   | 0             | 1         | 1         |
| Ndst2_j6         | 1.45087   | 1.96936   | 0             | 1         | 1         |
| Ndst2_j4         | 1.10968   | 1.26488   | 0             | 1         | 1         |
| Ndst2            | 0.458189  | 0.492658  | 0             | 1         | 1         |
| Kcnma1_j1        | 0.351939  | 0.298345  | 0             | 1         | 1         |
| Kcnma1_j4        | 0.268071  | 0.465326  | 0             | 1         | 1         |
| Kcnma1_j2        | 2.04739   | 2.25867   | 0             | 1         | 1         |
| AK086741_j1      | 0.0515985 | 0.154124  | 1.57869       | 0.313038  | 1         |
| Slmap_j5         | 1.7149    | 1.65971   | 0             | 1         | 1         |
| Slmap_j3         | 3.42095   | 3.64557   | 0             | 1         | 1         |
| Appl1_j3         | 0.363786  | 0.0758467 | 0             | 1         | 1         |
| Il17rb_j2        | 0.17022   | 0.0940634 | -0.855693     | 0.315067  | 0.659071  |
| Cacna1d_j7       | 0.183016  | 0.218297  | 0             | 1         | 1         |
| Stab1_j4         | 0.762471  | 1.85118   | 1.27969       | 3.53E-08  | 2.17E-06  |
| Stab1_j10        | 0.0696175 | 0.0822403 | 0.240396      | 0.869879  | 1         |
| Stab1_j11        | 0.116796  | 0.18498   | 0.663378      | 0.447798  | 0.754548  |
| Phf7_j4          | 0.0461103 | 0.145185  | 1.65473       | 0.238947  | 1         |
| Phf7             | 0.238653  | 0.0650541 | -1.8752       | 0.115162  | 0.422095  |
| Dnahc1_j4        | 0.0658559 | 0         | -1.79769e+308 | 0.0681621 | 1         |
| Sh3bp5_j1        | 4.96962   | 5.1421    | 0             | 1         | 1         |
| Hacl1            | 1.94414   | 1.51958   | 0             | 1         | 1         |

|                  |           |             |              |           |           |
|------------------|-----------|-------------|--------------|-----------|-----------|
| Ankrd28_j4       | 0.430626  | 0.398585    | 0            | 1         | 1         |
| Timm23_j1        | 0.660637  | 0.349891    | 0            | 1         | 1         |
| Wdfy4_j3         | 0.365589  | 0.439676    | 0.266221     | 1         | 1         |
| Fam35a_j4        | 0.470075  | 0.490928    | 0.0626198    | 0.826921  | 0.94428   |
| Fam35a_j10       | 0.300065  | 0.246217    | -0.285345    | 0.483195  | 0.77593   |
| Nrg3_j6          | 0.474368  | 0.474889    | 0.00158185   | 0.995584  | 0.998772  |
| Nrg3_j14         | 2.7561    | 0.000126064 | -14.4162     | 0.95038   | 0.985656  |
| Nrg3_j13         | 2.39951   | 5.00898     | 1.06178      | 3.29E-05  | 0.0008388 |
| Sh2d4b           | 0.250381  | 0.271132    | 0            | 1         | 1         |
| Tspan14_j2       | 0         | 0.572619    | 0            | 1         | 1         |
| Tspan14          | 0.548383  | 0.163701    | 0            | 1         | 1         |
| Tspan14_j3       | 1.13225   | 1.08341     | 0            | 1         | 1         |
| 5730469M10Rik_j1 | 4.03616   | 3.0626      | 0            | 1         | 1         |
| 5730469M10Rik_j2 | 1.56872   | 2.41743     | 0            | 1         | 1         |
| Txndc16_j6       | 0.0866076 | 0.0531906   | -0.703324    | 0.431511  | 1         |
| Txndc16          | 6.60076   | 5.5398      | -0.2528      | 0.0271266 | 0.173951  |
| Gnpnat1_j3       | 0.603236  | 0.892075    | 0.564443     | 0.0310155 | 0.189865  |
| Ddhd1_j1         | 0.147807  | 0.0173293   | -3.09243     | 0.0089603 | 0.0788679 |
| Cnih_j1          | 8.4082    | 9.6259      | 0.195125     | 0.282268  | 0.63083   |
| Cnih             | 6.76364   | 7.74757     | 0.195944     | 0.108889  | 0.410527  |
| Wdhd1_j1         | 1.32289   | 1.57184     | 0.248757     | 0.449322  | 0.755468  |
| Slc35f4_j3       | 0.0795832 | 0.186808    | 1.23102      | 0.309415  | 0.654092  |
| 3632451O06Rik_j8 | 1.53462   | 10.1296     | 0            | 1         | 1         |
| Ttc5             | 1.5229    | 0.94316     | -0.691247    | 0.050015  | 0.258408  |
| Klhl33_j1        | 0.712607  | 0.444887    | -0.679667    | 0.0145932 | 0.112642  |
| Ndr2_j1          | 15.2307   | 21.5658     | 0            | 1         | 1         |
| Ndr2_j2          | 18.7827   | 27.4381     | 0            | 1         | 1         |
| Ndr2_j3          | 15.9414   | 27.4863     | 0            | 1         | 1         |
| Zfp219_j2        | 0.666067  | 0.548598    | -0.279919    | 0.483247  | 0.775954  |
| Hnrnpc_j6        | 4.44218   | 5.19412     | 0            | 1         | 1         |
| Hnrnpc_j5        | 9.74284   | 10.1978     | 0            | 1         | 1         |
| Chd8_j1          | 5.42063   | 4.59127     | -0.239567    | 0.0376363 | 0.215281  |
| Sall2_j1         | 2.24027   | 1.95903     | 0            | 1         | 1         |
| Prmt5_j3         | 5.29315   | 4.11811     | 0            | 1         | 1         |
| Haus4_j2         | 6.46371   | 6.66365     | 0.0439498    | 0.789072  | 0.929637  |
| Jub_j1           | 0.078855  | 0.375275    | 2.25067      | 0.0089681 | 0.0788679 |
| 4931414P19Rik_j2 | 0         | 0.0625837   | 1.79769e+308 | 0.062173  | 1         |
| Psb5_j1          | 4.87817   | 7.7043      | 0            | 1         | 1         |
| Acin1_j7         | 7.58583   | 10.4093     | 0            | 1         | 1         |
| Slc7a8_j6        | 0.140986  | 0           | 0            | 1         | 1         |
| Slc22a17_j3      | 26.3691   | 20.7207     | 0            | 1         | 1         |
| Zfhx2_j1         | 0.926612  | 0.658932    | 0            | 1         | 1         |
| Ap1g2_j2         | 3.96004   | 4.12138     | 0            | 1         | 1         |
| Tm9sf1_j1        | 0.556501  | 0.577911    | 0            | 1         | 1         |
| Tm9sf1           | 6.25459   | 5.74362     | 0            | 1         | 1         |
| Nedd8_j2         | 1.48014   | 1.64302     | 0            | 1         | 1         |
| Nedd8            | 25.5747   | 28.5045     | 0            | 1         | 1         |

|                  |           |                 |           |           |           |
|------------------|-----------|-----------------|-----------|-----------|-----------|
| Dhrs1_j1         | 65.5323   | 88.9533         | 0         | 1         | 1         |
| Dhrs1_j5         | 31.4768   | 40.3535         | 0         | 1         | 1         |
| Ripk3_j2         | 0.0214354 | 0.107206        | 2.32231   | 0.401574  | 1         |
| Mcpt4            | 0.315925  | 0.85516         | 1.43661   | 0.0006501 | 0.0101108 |
| Pspc1_j2         | 0.374274  | 0               | 0         | 1         | 1         |
| Zmym5_j5         | 0         | 0.47412         | 0         | 1         | 1         |
| Cryl1_j1         | 0.59487   | 0.0790705       | -2.91136  | 0.0892564 | 0.366263  |
| Xpo4_j9          | 0.202963  | 0.213662        | 0.0741118 | 0.892289  | 0.965873  |
| Lats2_j1         | 4.84409   | 4.75874         | 0         | 1         | 1         |
| Zdhhc20_j2       | 0.354529  | 0.247124        | 0         | 1         | 1         |
| Zdhhc20_j1       | 0.369824  | 0.375784        | 0         | 1         | 1         |
| Setdb2_j7        | 0.420771  | 0.450363        | 0.0980528 | 0.812774  | 0.938836  |
| Dleu7            | 0.603238  | 0.686064        | 0.185617  | 0.540148  | 0.808768  |
| Ints6_j7         | 1.7822    | 1.86587         | 0         | 1         | 1         |
| Fdft1_j2         | 1.4921    | 1.64396         | 0         | 1         | 1         |
| Mttr9            | 6.98832   | 6.491           | -0.106506 | 0.341158  | 0.681074  |
| Hmbox1_j11       | 0.127141  | 0.14666         | 0         | 1         | 1         |
| Extl3_j7         | 6.6616    | 4.84674         | 0         | 1         | 1         |
| Ptk2b_j4         | 3.11518   | 2.50715         | 0         | 1         | 1         |
| Dpysl2_j3        | 0.128449  | 0 -1.79769e+308 |           | 4.84E-05  | 1         |
| Bnip3l_j2        | 5.7028    | 4.9575          | -0.202056 | 0.675158  | 0.877609  |
| Ppp2r2d_j3       | 0.10781   | 0.0948671       | -0.184509 | 0.859919  | 1         |
| Nefm_j3          | 1052.79   | 817.849         | -0.364311 | 0.0005468 | 0.0087942 |
| Nefm_j4          | 228.695   | 161.407         | -0.502726 | 1.59E-07  | 8.04E-06  |
| AK086749_j1      | 3.98482   | 4.3359          | 0.121816  | 0.461909  | 0.763021  |
| R3hcc1           | 5.66585   | 8.11609         | 0         | 1         | 1         |
| Chmp7_j2         | 6.72885   | 9.68911         | 0         | 1         | 1         |
| Rhobtb2_j2       | 0.543853  | 1.29936         | 0         | 1         | 1         |
| 2610301G19Rik_j1 | 1.57046   | 2.12146         | 0.433875  | 0.073718  | 0.327189  |
| Pdlim2_j3        | 1.59489   | 2.0113          | 0.334675  | 0.222962  | 0.570019  |
| Sorbs3_j3        | 2.17114   | 3.12033         | 0         | 1         | 1         |
| Sorbs3_j1        | 4.00563   | 4.55324         | 0         | 1         | 1         |
| Ppp3cc           | 9.41087   | 9.58087         | 0         | 1         | 1         |
| Slc39a14_j1      | 0.714756  | 0.518203        | 0         | 1         | 1         |
| Polr3d_j2        | 4.37742   | 5.2238          | 0         | 1         | 1         |
| Bmp1             | 0.202963  | 0.358459        | 0         | 1         | 1         |
| Bmp1_j1          | 0.386268  | 0.409321        | 0         | 1         | 1         |
| Fam160b2_j10     | 0.127973  | 0               | 0         | 1         | 1         |
| Epb4.9_j9        | 0.446564  | 0.0812615       | 0         | 1         | 1         |
| Epb4.9_j1        | 0.067749  | 0.0640401       | 0         | 1         | 1         |
| Fgf17_j1         | 0.0948695 | 0.131818        | 0.474529  | 0.557764  | 1         |
| Fndc3a_j4        | 2.68325   | 3.54451         | 0         | 1         | 1         |
| Fndc3a_j5        | 0.0856471 | 0.191413        | 0         | 1         | 1         |
| Cysltr2_j5       | 0.275567  | 0.099099        | -1.47546  | 0.0116982 | 0.0962435 |
| Lrch1_j2         | 0.310982  | 0.739328        | 0         | 1         | 1         |
| Lrch1_j4         | 0.190092  | 0.237679        | 0         | 1         | 1         |
| XLOC_010129      | 0.114529  | 0.483469        | 2.07772   | 0.0837592 | 0.352949  |



|                  |           |                        |            |           |           |
|------------------|-----------|------------------------|------------|-----------|-----------|
| XLOC_010129      | 1.17059   | 1.54039                | 0.396049   | 0.253825  | 0.601967  |
| Cog3_j4          | 0         | 0.300621               | 0          | 1         | 1         |
| Cog3_j2          | 0.795893  | 1.39865                | 0          | 1         | 1         |
| Slc25a30_j1      | 4.59124   | 5.05304                | 0.138268   | 0.404187  | 0.72669   |
| Dnajc15_j5       | 0.172114  | 0.19479                | 0          | 1         | 1         |
| Lect1_j2         | 3.09599   | 3.50816                | 0          | 1         | 1         |
| Lect1            | 6.66014   | 6.81452                | 0          | 1         | 1         |
| Klhl1_j4         | 0.0525415 | 0.0494102              | -0.0886484 | 1         | 1         |
| Dach1_j2         | 0.0941268 | 0 -1.79769e+308        | 0.0640593  | 1         | 1         |
| Dach1_j4         | 0.322164  | 0.264996               | -0.281826  | 0.62109   | 0.851483  |
| Dach1_j3         | 0.0597267 | 0.0309676              | -0.947616  | 0.547249  | 1         |
| Dis3_j2          | 0.638993  | 0.679574               | 0.0888314  | 0.742627  | 0.90994   |
| Tbc1d4_j3        | 0         | 0.648253               | 0          | 1         | 1         |
| Tbc1d4_j4        | 0.178662  | 0.586619               | 0          | 1         | 1         |
| Tbc1d4_j5        | 0.64722   | 0.715152               | 0          | 1         | 1         |
| Fbxl3_j4         | 3.0248    | 4.82607                | 0          | 1         | 1         |
| Fbxl3_j5         | 2.24859   | 1.90401                | 0          | 1         | 1         |
| Mycbp2_j3        | 2.52251   | 2.16864                | -0.218071  | 0.0647969 | 0.30276   |
| Mycbp2_j2        | 0         | 0.0512463 1.79769e+308 | 0.0006514  | 1         | 1         |
| Mycbp2_j1        | 0.0628003 | 0.0179041              | -1.81048   | 0.0224284 | 1         |
| Ednrb_j1         | 0         | 0.1755                 | 0          | 1         | 1         |
| Pou4f1_j1        | 14.1628   | 12.4754                | 0          | 1         | 1         |
| Rnf219           | 5.63477   | 4.34667                | -0.374446  | 0.0047252 | 0.0485971 |
| Rbm26            | 1.30883   | 1.04464                | 0          | 1         | 1         |
| XLOC_010177      | 0.0861387 | 0 -1.79769e+308        | 0.026507   | 1         | 1         |
| XLOC_010177      | 0         | 0.121816 1.79769e+308  | 0.075568   | 1         | 1         |
| XLOC_010177      | 0.388976  | 0.664776               | 0.773189   | 0.0538696 | 0.270481  |
| XLOC_010177      | 0.165899  | 0.172491               | 0.0562112  | 0.944681  | 0.983577  |
| XLOC_010178      | 0.374068  | 0.579881               | 0.632456   | 0.2768    | 0.625815  |
| XLOC_010177      | 0.139117  | 0.11854                | -0.230923  | 0.86155   | 0.956211  |
| Tgds_j5          | 0.233023  | 0.669351               | 1.52229    | 0.0676125 | 0.31119   |
| Abcc4_j5         | 0.840892  | 1.3895                 | 0          | 1         | 1         |
| Dzip1_j4         | 1.18658   | 0.541127               | 0          | 1         | 1         |
| Dzip1_j5         | 1.11716   | 0.684307               | 0          | 1         | 1         |
| Uggt2_j4         | 0.110705  | 0.303056               | 1.45287    | 0.0082353 | 0.0742319 |
| Stk24_j3         | 21.0017   | 10.0331                | 0          | 1         | 1         |
| Dock9_j16        | 2.72821   | 2.79495                | 0.0348714  | 0.860677  | 0.955865  |
| Tmtc4_j4         | 1.87206   | 5.0015                 | 0          | 1         | 1         |
| Tmtc4            | 8.27906   | 15.8532                | 0          | 1         | 1         |
| Nalcn_j5         | 2.13066   | 1.04148                | -1.03267   | 7.96E-07  | 3.42E-05  |
| Nalcn_j4         | 0         | 0.243422 1.79769e+308  | 1.62E-06   | 6.27E-05  |           |
| Flnb_j5          | 0.623093  | 1.64116                | 0          | 1         | 1         |
| XLOC_009546      | 0.0622691 | 0.0631719              | 0          | 1         | 1         |
| 3830406C13Rik_j4 | 12.8853   | 11.7176                | -0.137047  | 0.246812  | 0.594332  |
| Atxn7_j4         | 0.674347  | 0.630512               | -0.0969655 | 0.683623  | 0.881559  |
| Atxn7_j5         | 0.604135  | 0.341976               | -0.820978  | 0.009712  | 0.0838659 |
| Il3ra_j6         | 0.3189    | 0.463904               | 0.540719   | 0.255539  | 0.604238  |

|                  |           |             |               |           |           |
|------------------|-----------|-------------|---------------|-----------|-----------|
| Il3ra_j8         | 0.731476  | 0.593386    | -0.30184      | 0.392531  | 0.718786  |
| Thrb_j1          | 0.101485  | 0.114115    | 0.169234      | 0.754677  | 1         |
| Thrb_j7          | 0.0988345 | 0           | -1.79769e+308 | 0.0001303 | 1         |
| Fam149b_j4       | 0.304986  | 0.282216    | -0.111943     | 0.657576  | 0.869529  |
| Sec24c_j4        | 1.12864   | 0.996917    | -0.179041     | 0.34639   | 0.685483  |
| 2310021P13Rik_j7 | 0.164223  | 0           | 0             | 1         | 1         |
| Plau_j1          | 0.998064  | 2.15452     | 0             | 1         | 1         |
| Vcl_j2           | 0.397763  | 0           | 0             | 1         | 1         |
| Myst4_j2         | 0.0442107 | 0.0657011   | 0             | 1         | 1         |
| Myst4_j1         | 0.138619  | 0.11482     | 0             | 1         | 1         |
| Vdac2_j5         | 0.126369  | 0.123093    | 0             | 1         | 1         |
| 1700112E06Rik_j4 | 1.53794   | 0.651816    | -1.23846      | 0.0335824 | 0.200268  |
| Rps24            | 7.51074   | 13.5438     | 0             | 1         | 1         |
| Rps24            | 22.7768   | 25.0419     | 0             | 1         | 1         |
| Rps24_j7         | 7.8678    | 8.43767     | 0             | 1         | 1         |
| Zmiz1_j1         | 0.851222  | 0.204825    | -2.05514      | 3.47E-07  | 1.61E-05  |
| Zmiz1_j6         | 3.72466   | 2.45017     | -0.604228     | 9.52E-05  | 0.0020639 |
| Fam116a_j5       | 3.69091   | 3.84511     | 0             | 1         | 1         |
| Arhgef3          | 1.87723   | 1.9601      | 0             | 1         | 1         |
| Arhgef3_j2       | 1.19045   | 0.784936    | 0             | 1         | 1         |
| D14Abb1e_j1      | 0.183921  | 0           | -1.79769e+308 | 1.71E-13  | 2.76E-11  |
| Erc2_j3          | 1.60026   | 2.61669     | 0             | 1         | 1         |
| Erc2_j7          | 1.02573   | 1.50775     | 0             | 1         | 1         |
| Erc2_j8          | 3.24113   | 3.30867     | 0             | 1         | 1         |
| Erc2_j11         | 1.15637   | 0.000620403 | 0             | 1         | 1         |
| Wnt5a_j2         | 0.0989956 | 0           | 0             | 1         | 1         |
| Dcp1a_j2         | 0.984909  | 1.10684     | 0             | 1         | 1         |
| Tkt_j1           | 0.167226  | 0           | 0             | 1         | 1         |
| Sfmbt1_j2        | 0.341179  | 0.113888    | 0             | 1         | 1         |
| XLOC_009600      | 0.0489122 | 0.0334279   | -0.549144     | 0.725241  | 1         |
| Nek4_j4          | 0.573791  | 0.622132    | 0.116697      | 0.788216  | 0.929506  |
| Tnnc1_j3         | 0.208918  | 0.28143     | 0             | 1         | 1         |
| Tnnc1_j4         | 0.211767  | 0.0800338   | 0             | 1         | 1         |
| Sema3g_j1        | 2.85381   | 2.4546      | 0             | 1         | 1         |
| Galnt12_j2       | 0.209557  | 0.00584077  | -5.16504      | 0.0101027 | 0.0861559 |
| Galnt12_j1       | 0.082242  | 0           | -1.79769e+308 | 7.00E-05  | 1         |
| Ncoa4_j3         | 1.0092    | 1.2131      | 0.265493      | 0.507582  | 0.789728  |
| Ogdhl_j4         | 1.8159    | 1.52134     | 0             | 1         | 1         |
| Ogdhl_j5         | 4.04233   | 4.44772     | 0             | 1         | 1         |
| Ercc6_j2         | 0         | 0.11601     | 1.79769e+308  | 0.0001653 | 1         |
| Ercc6_j6         | 0.397229  | 0.447712    | 0.172602      | 0.565899  | 0.824157  |
| Ercc6_j11        | 0.760953  | 0.859327    | 0.175401      | 0.476567  | 0.772209  |
| XLOC_009619      | 0.108086  | 0.0427733   | -1.3374       | 0.365376  | 1         |
| 1810011H11Rik_j1 | 0.185591  | 0.0199671   | -3.21643      | 0.242833  | 0.590261  |
| E130203B14Rik_j1 | 2.12313   | 2.56101     | 0.270517      | 0.222542  | 0.56956   |
| Rpl23a-ps3       | 107.43    | 123.78      | 0.204377      | 0.0334745 | 0.199875  |
| Syt15_j4         | 0.231254  | 2.22E-05    | -13.3453      | 0.925468  | 0.976854  |

|                  |           |           |               |           |           |
|------------------|-----------|-----------|---------------|-----------|-----------|
| Grid1_j4         | 1.26258   | 1.21715   | -0.0528702    | 0.854396  | 0.953902  |
| Gm8104_j4        | 0.177564  | 0         | -1.79769e+308 | 0.0006728 | 0.0104079 |
| XLOC_009649      | 0.131062  | 0.0428189 | -1.61393      | 0.226276  | 1         |
| Socs4_j2         | 2.23645   | 1.73544   | 0             | 1         | 1         |
| Lgals3           | 3.43083   | 7.09167   | 1.04757       | 3.90E-05  | 0.0009647 |
| Peli2            | 0.79058   | 0.910258  | 0             | 1         | 1         |
| 6720456H2ORik    | 0.405137  | 0.146838  | 0             | 1         | 1         |
| 6720456H2ORik_j2 | 0.650291  | 0.771131  | 0             | 1         | 1         |
| XLOC_009667      | 334.004   | 405.484   | 0.279777      | 0.0388691 | 0.219867  |
| Pnp_j2           | 1.31763   | 1.38283   | 0.0696766     | 0.696901  | 0.888405  |
| Rnase6           | 0.133784  | 0.291446  | 1.12333       | 0.0572466 | 0.280387  |
| Mett11d1_j4      | 0.561719  | 0.350413  | -0.680791     | 0.159619  | 0.494017  |
| Arhgef40_j2      | 0.13563   | 0         | 0             | 1         | 1         |
| Tcra_j2          | 0.185089  | 0         | -1.79769e+308 | 0.0107387 | 0.0901908 |
| Ngdn_j4          | 9.00846   | 10.3657   | 0.202459      | 0.205352  | 0.549744  |
| Gm10364          | 0.149286  | 0.169749  | 0.185321      | 0.772579  | 0.922879  |
| Dcaf11_j5        | 2.42864   | 2.76084   | 0.184957      | 0.483523  | 0.77601   |
| Nfatc4_j3        | 0.0729498 | 0         | -1.79769e+308 | 0.0044512 | 1         |
| Nynrin           | 0.676888  | 0.695765  | 0.0396815     | 0.852625  | 0.953298  |
| XLOC_009725      | 0.0713197 | 0.0699972 | -0.0270039    | 0.972222  | 1         |
| Gm10094_j1       | 9.30516   | 9.47548   | 0.0261689     | 0.800244  | 0.933436  |
| AK014273         | 0.711294  | 0.620338  | -0.197392     | 0.682045  | 0.880617  |
| AK014273_j1      | 0.261303  | 0.22972   | -0.185844     | 0.859978  | 0.955708  |
| Rcbtb1_j4        | 4.32883   | 4.4865    | 0             | 1         | 1         |
| Wdfy2_j1         | 0.25021   | 0         | 0             | 1         | 1         |
| Xkr6_j2          | 0.311318  | 0.158084  | -0.977693     | 0.143769  | 0.470722  |
| Pinx1_j1         | 1.49715   | 1.31      | -0.192659     | 0.65366   | 0.867529  |
| Fbxo16_j3        | 1.04398   | 0.725723  | -0.524605     | 0.29476   | 0.641359  |
| Zfp395_j1        | 0.235664  | 0         | -1.79769e+308 | 1.09E-07  | 5.82E-06  |
| Clu_j2           | 4.85484   | 4.64528   | -0.0636581    | 0.765852  | 0.920008  |
| Clu_j4           | 0.751784  | 0.668122  | -0.170208     | 0.734049  | 0.90626   |
| Clu_j5           | 0.1604    | 0.0533765 | -1.5874       | 0.371034  | 0.703973  |
| XLOC_009767      | 0.166171  | 0.10095   | 0             | 1         | 1         |
| Stmn4_j3         | 6.4375    | 19.7852   | 1.61985       | 0         | 0         |
| Ebf2             | 0.248171  | 0.301513  | 0.280889      | 0.44534   | 0.752905  |
| Ebf2_j2          | 0.512309  | 0.267746  | -0.936146     | 0.0264216 | 0.170801  |
| Kctd9_j1         | 0.975033  | 0.556227  | -0.809777     | 0.191867  | 0.534088  |
| XLOC_009773      | 0.138546  | 0.181914  | 0.392885      | 0.669482  | 0.874851  |
| Gnrh1_j2         | 0.103712  | 0.107419  | 0.0506707     | 0.957056  | 1         |
| Entpd4_j5        | 14.9244   | 13.1848   | -0.178793     | 0.173733  | 0.511655  |
| AK133329_j2      | 0.169363  | 0.110229  | -0.619612     | 0.32311   | 0.666115  |
| Tnfrsf10b_j1     | 0.255542  | 0.209988  | -0.283258     | 0.625685  | 0.853962  |
| Phyhip_j1        | 1.54949   | 1.4564    | -0.0893935    | 0.708693  | 0.893844  |
| Nudt18_j1        | 0.654724  | 0.174027  | -1.91158      | 0.125768  | 0.441571  |
| XLOC_009792      | 0.145898  | 0.0928092 | -0.652617     | 0.160289  | 0.49487   |
| Med4_j2          | 0.195539  | 0         | -1.79769e+308 | 0.0045572 | 0.0473672 |
| XLOC_009799      | 0.090801  | 0         | -1.79769e+308 | 0.021981  | 1         |

|                  |           |                 |             |           |           |
|------------------|-----------|-----------------|-------------|-----------|-----------|
| Zc3h13_j7        | 2.17535   | 2.82487         | 0           | 1         | 1         |
| Enox1_j3         | 0.973835  | 0.707434        | 0           | 1         | 1         |
| Enox1_j9         | 3.3511    | 5.17651         | 0           | 1         | 1         |
| Olfm4_j2         | 0.0769082 | 0 -1.79769e+308 | 0.0118046   |           | 1         |
| Pcdh17_j1        | 0.589228  | 0.690078        | 0.227933    | 0.289405  | 0.636908  |
| Tdrd3_j6         | 1.81449   | 1.40694         | -0.366999   | 0.142157  | 0.468814  |
| Tdrd3_j7         | 1.2397    | 2.1246          | 0.777195    | 0.0013789 | 0.0185109 |
| Klf5_j1          | 7.01767   | 7.00396         | -0.00282185 | 0.982787  | 0.994708  |
| Uchl3_j8         | 0.674056  | 0.770447        | 0.192827    | 0.725303  | 0.902457  |
| Lmo7_j2          | 0.0931374 | 0.509358        | 2.45125     | 4.22E-06  | 0.0001458 |
| Lmo7_j9          | 0.090323  | 1.37008         | 3.92302     | 2.22E-15  | 4.62E-13  |
| Lmo7_j12         | 2.09603   | 7.96656         | 1.92629     | 0         | 0         |
| Scel_j2          | 0.164254  | 0.118677        | -0.468893   | 0.493595  | 0.78204   |
| Scel_j5          | 0.108579  | 0 -1.79769e+308 | 0.0031466   |           | 1         |
| Ndfip2_j1        | 32.8301   | 32.119          | 0           | 1         | 1         |
| FJ744746         | 0.480738  | 0.394623        | -0.284774   | 0.568761  | 0.825676  |
| FJ744746_j1      | 0.145091  | 0 -1.79769e+308 | 0.0097999   | 0.0844436 |           |
| Gpc5_j2          | 0.187763  | 0.0679188       | -1.46703    | 0.150103  | 0.48004   |
| AK147121_j1      | 0.253305  | 0.12319         | -1.03999    | 0.0444797 | 0.240614  |
| Mbnl2_j4         | 0.761854  | 0.423719        | -0.846408   | 0.125014  | 0.440439  |
| Mbnl2_j5         | 0.130737  | 0 -1.79769e+308 | 0.0102994   |           | 1         |
| Mbnl2_j6         | 1.83066   | 4.60985         | 1.33236     | 8.20E-08  | 4.51E-06  |
| XLOC_009865      | 0.197237  | 0.137957        | -0.515709   | 0.275618  | 0.624585  |
| AK041589_j2      | 0.103988  | 0 -1.79769e+308 | 0.0133943   |           | 1         |
| Fhit_j3          | 0.54444   | 0.683494        | 0.328158    | 0.658311  | 0.870123  |
| Fhit_j4          | 6.326     | 8.11477         | 0.359256    | 0.292005  | 0.638936  |
| Fhit_j10         | 1.15438   | 0.988929        | -0.223183   | 0.721791  | 0.900696  |
| Cadps_j9         | 8.78654   | 9.55912         | 0           | 1         | 1         |
| Cadps_j10        | 0.227027  | 0.151687        | 0           | 1         | 1         |
| Thoc7_j1         | 14.4388   | 12.6498         | 0           | 1         | 1         |
| Thoc7_j2         | 2.66566   | 2.72015         | 0           | 1         | 1         |
| Oxsm_j2          | 0.240711  | 0 -1.79769e+308 | 4.38E-06    | 0.0001508 |           |
| Oxsm             | 1.36154   | 1.62638         | 0.256419    | 0.230324  | 0.577332  |
| Nr1d2_j4         | 1.69174   | 1.36319         | 0           | 1         | 1         |
| 2700060E02Rik    | 0.397185  | 0.415865        | 0.0663028   | 0.846072  | 0.951378  |
| Gng2_j4          | 0.285897  | 0 -1.79769e+308 | 6.16E-07    | 2.72E-05  |           |
| 1810063B07Rik_j1 | 2.85567   | 3.03108         | 0.0860013   | 0.790214  | 0.930148  |
| Dnajc9_j1        | 3.30185   | 3.53501         | 0.0984391   | 0.498721  | 0.78413   |
| Ttc18_j8         | 0.23771   | 0.197227        | -0.269346   | 0.641937  | 0.86192   |
| Ttc18_j11        | 0.067865  | 0 -1.79769e+308 | 0.0686852   |           | 1         |
| Zmynd17_j2       | 0.190556  | 0.0915223       | -1.05802    | 0.320279  | 0.663642  |
| Ppp3cb_j2        | 16.456    | 15.8329         | 0           | 1         | 1         |
| Ppp3cb_j3        | 2.59559   | 1.69551         | 0           | 1         | 1         |
| Camk2g           | 17.9671   | 18.0661         | 0           | 1         | 1         |
| Camk2g           | 12.5784   | 16.0227         | 0           | 1         | 1         |
| Kcnma1_j2        | 4.12601   | 3.81691         | 0           | 1         | 1         |
| Kcnma1_j6        | 0.0643065 | 0               | 0           | 1         | 1         |

|                  |            |            |               |           |           |
|------------------|------------|------------|---------------|-----------|-----------|
| Dlg5_j6          | 0.442826   | 0.18858    | 0             | 1         | 1         |
| Polr3a_j1        | 3.57022    | 3.26992    | 0             | 1         | 1         |
| AK086741_j2      | 0.22905    | 0.0071589  | -4.99978      | 0.505018  | 0.788044  |
| D14Ertd449e_j2   | 0          | 0.0502575  | 1.79769e+308  | 0.19551   | 1         |
| D14Ertd449e_j1   | 5.71667    | 6.39491    | 0.161749      | 0.414551  | 0.732858  |
| Smap_j12         | 0.780094   | 0.561132   | 0             | 1         | 1         |
| Appl1_j4         | 0.545995   | 0.413464   | 0             | 1         | 1         |
| Ccdc66           | 0.640751   | 0.565502   | -0.180231     | 0.522424  | 0.798883  |
| Cacna1d          | 0.38695    | 0.480723   | 0             | 1         | 1         |
| Cacna1d_j14      | 0.0451432  | 0.0669592  | 0             | 1         | 1         |
| Itih3_j5         | 0.054284   | 0          | -1.79769e+308 | 0.0253167 | 1         |
| Gnl3_j2          | 0.243334   | 0.58335    | 0             | 1         | 1         |
| 2010107H07Rik_j2 | 0.173024   | 0.0863777  | 0             | 1         | 1         |
| Stab1_j2         | 0.200582   | 0.196711   | -0.0281123    | 0.958481  | 0.988065  |
| Nisch_j1         | 2.68686    | 1.69467    | 0             | 1         | 1         |
| Nisch_j2         | 36.3575    | 35.58      | 0             | 1         | 1         |
| Hacl1_j1         | 0.58928    | 0.634224   | 0             | 1         | 1         |
| Ankrd28          | 1.84112    | 2.14774    | 0             | 1         | 1         |
| 3425401B19Rik    | 0.440096   | 0.464951   | 0.0792605     | 0.746288  | 0.911608  |
| Fam35a_j8        | 0.129306   | 0          | -1.79769e+308 | 6.07E-05  | 1         |
| Sncg_j1          | 545.848    | 675.932    | 0.308378      | 0.0004338 | 0.0072243 |
| Ldb3_j1          | 0.257236   | 0.00211047 | 0             | 1         | 1         |
| Ldb3_j4          | 1.68546    | 1.14347    | 0             | 1         | 1         |
| Opn4_j1          | 0.1125     | 0.0774137  | -0.539259     | 0.663703  | 1         |
| Gcap14_j2        | 34.166     | 25.8855    | 0             | 1         | 1         |
| Gcap14_j3        | 0.249742   | 0          | 0             | 1         | 1         |
| Cdhr1_j2         | 5.60516    | 8.13776    | 0             | 1         | 1         |
| Nrg3_j11         | 11.5663    | 7.14888    | -0.694138     | 0.121092  | 0.433262  |
| Txndc16_j4       | 0.296548   | 0.250891   | -0.241206     | 0.613108  | 0.847467  |
| Ddhd1_j10        | 3.79418    | 3.97796    | 0.0682433     | 0.63189   | 0.856815  |
| Ddhd1_j9         | 0.374343   | 0          | -1.79769e+308 | 2.33E-19  | 6.40E-17  |
| Ddhd1            | 2.02081    | 1.6393     | -0.301851     | 0.0436154 | 0.237298  |
| Gmfb_j2          | 39.8971    | 33.3845    | 0             | 1         | 1         |
| XLOC_009992      | 0.11713    | 0.0881126  | -0.410684     | 0.729891  | 1         |
| Wdhd1_j2         | 0.21208    | 0.0211905  | -3.32312      | 0.0274511 | 0.175242  |
| Wdhd1_j3         | 0.0846095  | 0          | -1.79769e+308 | 0.0015726 | 1         |
| Wdhd1_j4         | 0.114055   | 0.102923   | -0.148164     | 0.827942  | 1         |
| Slc35f4_j1       | 4.5236     | 3.41191    | -0.406893     | 0.0366887 | 0.211804  |
| Slc35f4_j5       | 0.00417877 | 0.0497112  | 3.57242       | 0.499879  | 1         |
| 3632451O06Rik_j1 | 0.520648   | 0.810585   | 0             | 1         | 1         |
| 3632451O06Rik_j5 | 0.407418   | 0.291113   | 0             | 1         | 1         |
| Ttc5_j3          | 1.43553    | 1.33826    | -0.101225     | 0.568016  | 0.825207  |
| Osgep_j1         | 3.13909    | 2.98124    | -0.0744328    | 0.614671  | 0.847787  |
| Ndrp2_j7         | 1.10333    | 0          | 0             | 1         | 1         |
| Zfp219_j1        | 2.42735    | 2.68993    | 0.148182      | 0.2725    | 0.621353  |
| Zfp219           | 0.148702   | 0.302742   | 1.02566       | 0.0045408 | 0.0472289 |
| Hnrnpj4          | 0.00625716 | 0.0487717  | 0             | 1         | 1         |

|                  |           |                 |            |           |           |
|------------------|-----------|-----------------|------------|-----------|-----------|
| Chd8_j8          | 2.71691   | 2.8503          | 0.0691475  | 0.630863  | 0.856455  |
| Sall2_j2         | 0.498224  | 0.453051        | 0          | 1         | 1         |
| Sall2            | 3.2456    | 3.37031         | 0          | 1         | 1         |
| Prmt5_j1         | 0.681846  | 1.38586         | 0          | 1         | 1         |
| 4931414P19Rik_j3 | 0.392083  | 0.119486        | -1.71432   | 0.0221659 | 0.151299  |
| Cdh24_j3         | 0.746149  | 1.08175         | 0.535834   | 0.099399  | 0.390293  |
| Cdh24_j8         | 0.0428353 | 0.0865029       | 1.01395    | 0.491304  | 1         |
| Acin1            | 3.85557   | 3.94133         | 0          | 1         | 1         |
| Acin1_j4         | 1.17909   | 1.34501         | 0          | 1         | 1         |
| Slc7a8_j2        | 0.112471  | 0               | 0          | 1         | 1         |
| Slc7a8_j3        | 1.16508   | 0.00030026      | 0          | 1         | 1         |
| Slc7a8_j4        | 1.16416   | 1.97971         | 0          | 1         | 1         |
| Zfx2_j4          | 1.56936   | 1.30772         | 0          | 1         | 1         |
| Psme2_j1         | 0.040174  | 0.0651894       | 0.698376   | 0.570642  | 1         |
| Psme2_j2         | 0.0718668 | 0.0575132       | -0.321434  | 0.754086  | 1         |
| Psme2_j4         | 0.590614  | 0.448853        | -0.395972  | 0.533944  | 0.805317  |
| Ipo4_j3          | 17.9916   | 20.2939         | 0          | 1         | 1         |
| Ipo4_j4          | 1.2744    | 2.21972         | 0          | 1         | 1         |
| Rabggta_j3       | 0.428838  | 0.686564        | 0.678961   | 0.109904  | 0.412503  |
| Adcy4_j3         | 0.133549  | 0.0136156       | -3.29404   | 0.06635   | 1         |
| Adcy4_j5         | 0.0572348 | 0 -1.79769e+308 | 0.0100284  | 0.0100284 | 1         |
| Ripk3_j1         | 0.110703  | 0.0506016       | -1.12943   | 0.45054   | 1         |
| Sdr39u1_j2       | 2.02136   | 1.50169         | 0          | 1         | 1         |
| Sdr39u1_j1       | 11.0785   | 9.1816          | 0          | 1         | 1         |
| Zmym5_j9         | 0.750514  | 0.511216        | 0          | 1         | 1         |
| Zmym5_j10        | 0.744368  | 0.608777        | 0          | 1         | 1         |
| Zmym5_j15        | 2.02933   | 0.361162        | 0          | 1         | 1         |
| Gjb6_j1          | 0.141278  | 0.157522        | 0.157018   | 0.841564  | 0.949932  |
| Gjb6             | 0.138064  | 0.13657         | -0.0156955 | 0.983624  | 0.995188  |
| Tnfrsf19         | 0.33213   | 0.089342        | -1.89434   | 0.0054313 | 0.0540236 |
| Kpna3_j2         | 3.9636    | 6.00729         | 0          | 1         | 1         |
| Fdft1_j4         | 24.6555   | 31.5495         | 0          | 1         | 1         |
| Neil2_j3         | 0.0969225 | 0 -1.79769e+308 | 0.0177684  | 0.0177684 | 1         |
| Neil2            | 0.169114  | 0.248988        | 0.558084   | 0.491528  | 0.780571  |
| Msra_j1          | 2.38217   | 2.91347         | 0          | 1         | 1         |
| Msra_j2          | 1.63552   | 0               | 0          | 1         | 1         |
| Hmbox1_j2        | 2.39533   | 1.46684         | 0          | 1         | 1         |
| Extl3_j6         | 15.835    | 21.7683         | 0          | 1         | 1         |
| Fzd3_j1          | 0.23151   | 0 -1.79769e+308 | 3.17E-16   | 7.58E-14  | 1         |
| Ephx2_j2         | 0.331315  | 0.589351        | 0.830924   | 0.191709  | 0.533938  |
| Ptk2b_j2         | 0.261168  | 0               | 0          | 1         | 1         |
| Bnip3l_j1        | 0.23441   | 0.0434183       | -2.43266   | 0.0428135 | 0.234279  |
| Nefm_j1          | 24.8819   | 4.62043         | -2.429     | 0         | 0         |
| AK086749_j2      | 0.125925  | 0.0706133       | -0.834553  | 0.262737  | 1         |
| Chmp7_j1         | 2.24455   | 3.32989         | 0          | 1         | 1         |
| Rhobtb2_j5       | 2.69794   | 2.85916         | 0          | 1         | 1         |
| 9930012K11Rik_j2 | 0.582121  | 0.466989        | -0.317931  | 0.626761  | 0.854266  |

|                     |           |                        |            |           |           |
|---------------------|-----------|------------------------|------------|-----------|-----------|
| Ppp3cc_j1           | 0.481719  | 0.162157               | 0          | 1         | 1         |
| Polr3d_j1           | 1.38649   | 2.29624                | 0          | 1         | 1         |
| Bmp1_j2             | 1.56137   | 2.57874                | 0          | 1         | 1         |
| Fam160b2_j6         | 0.788501  | 1.33934                | 0          | 1         | 1         |
| Fam160b2_j5         | 3.03514   | 2.53691                | 0          | 1         | 1         |
| Fam160b2_j4         | 3.12286   | 2.68533                | 0          | 1         | 1         |
| Cysltr2             | 0.206511  | 0 -1.79769e+308        |            | 2.97E-08  | 1.87E-06  |
| Dnajc15_j3          | 0.0686174 | 0.028219               | 0          | 1         | 1         |
| Dnajc15_j2          | 3.64179   | 3.32353                | 0          | 1         | 1         |
| Dgkh_j6             | 16.6022   | 15.0782                | 0          | 1         | 1         |
| Naa16_j1            | 0.0682272 | 0 -1.79769e+308        |            | 0.0207426 | 1         |
| Naa16_j2            | 0.0770906 | 0 -1.79769e+308        |            | 0.007038  | 1         |
| Wbp4_j1             | 21.0925   | 22.4995                | 0.0931585  | 0.380699  | 0.71156   |
| XLOC_010150         | 0.231289  | 0.196977               | -0.23167   | 0.788184  | 0.929506  |
| Pcdh9_j7            | 0.0695106 | 0 -1.79769e+308        |            | 0.181396  | 1         |
| Pcdh9_j9            | 3.73593   | 3.22113                | 0          | 1         | 1         |
| Pcdh9_j10           | 0.743169  | 0.893405               | 0          | 1         | 1         |
| Klf12_j6            | 0.262252  | 0.301352               | 0.200496   | 0.500207  | 0.785035  |
| Tbc1d4_j7           | 0.533517  | 0.367743               | 0          | 1         | 1         |
| Tbc1d4_j6           | 0.327673  | 0.256058               | 0          | 1         | 1         |
| Fbxl3_j1            | 2.15778   | 2.53741                | 0          | 1         | 1         |
| Fbxl3_j3            | 0.0128132 | 0.268479               | 0          | 1         | 1         |
| Ednrb_j2            | 8.26362   | 9.49596                | 0          | 1         | 1         |
| Ednrb               | 7.20225   | 5.43493                | 0          | 1         | 1         |
| Rbm26_j2            | 2.56226   | 2.81722                | 0          | 1         | 1         |
| XLOC_010170         | 0.183417  | 0                      | 0          | 1         | 1         |
| Tgds_j4             | 0.217717  | 0 -1.79769e+308        |            | 0.0081085 | 0.0733328 |
| Uggt2_j3            | 0.218704  | 0.199611               | -0.131792  | 0.759443  | 0.91718   |
| Uggt2_j2            | 0.0544553 | 0.0469872              | -0.212805  | 0.74799   | 1         |
| Uggt2_j7            | 0.354692  | 0.239535               | -0.566332  | 0.178752  | 0.51826   |
| Stk24_j4            | 1.4984    | 0                      | 0          | 1         | 1         |
| Stk24               | 1.77744   | 1.98203                | 0          | 1         | 1         |
| Dock9_j11           | 0.984567  | 1.01613                | 0.0455241  | 0.818829  | 0.941291  |
| Nalcn_j3            | 0.727134  | 0.554157               | -0.391926  | 0.139853  | 0.465246  |
| Nalcn_j9            | 0.862037  | 0.789148               | -0.127454  | 0.575135  | 0.828142  |
| Nalcn_j8            | 1.17802   | 1.02915                | -0.194912  | 0.389254  | 0.716466  |
| FGF-14C (FHF-4C)_j1 | 0.351494  | 0.141909               | -1.30853   | 0.308444  | 0.653344  |
| Flnb_j1             | 0.467609  | 0.591512               | 0          | 1         | 1         |
| Abhd6               | 0.193171  | 0.213859               | 0.14678    | 0.735073  | 0.906609  |
| Pxk                 | 2.60011   | 2.48059                | -0.0678854 | 0.588236  | 0.835413  |
| Pxk                 | 1.94765   | 1.83423                | -0.0865549 | 0.53664   | 0.807022  |
| 3830406C13Rik_j1    | 0.405565  | 0.325519               | -0.317193  | 0.521123  | 0.798005  |
| 3830406C13Rik       | 1.12976   | 1.25412                | 0.150661   | 0.606716  | 0.845067  |
| Synpr_j1            | 18.4136   | 19.2099                | 0.06108    | 0.741047  | 0.90924   |
| Atxn7_j6            | 0         | 0.130403 1.79769e+308  |            | 0.0005422 | 1         |
| Il3ra_j5            | 0         | 0.0807624 1.79769e+308 |            | 0.081691  | 1         |
| Slc4a7              | 0.246453  | 0.0641456              | 0          | 1         | 1         |

|                  |            |           |               |           |           |
|------------------|------------|-----------|---------------|-----------|-----------|
| Slc4a7_j6        | 0.381441   | 0.377966  | 0             | 1         | 1         |
| Top2b_j5         | 0          | 0.23859   | 0             | 1         | 1         |
| Thrb_j3          | 0          | 0.136558  | 1.79769e+308  | 0.0002635 | 1         |
| Thrb_j2          | 0.243645   | 0.123124  | -0.984664     | 0.046993  | 0.24858   |
| Nid2_j1          | 2.28767    | 3.13564   | 0.45488       | 0.0024994 | 0.0298369 |
| Sec24c_j2        | 0.48996    | 0.61412   | 0.325856      | 0.25015   | 0.597732  |
| Sec24c_j7        | 2.94835    | 4.09183   | 0.472839      | 0.0001523 | 0.0030554 |
| Sec24c_j9        | 0.222579   | 0.151398  | -0.555969     | 0.186898  | 0.527882  |
| 2310021P13Rik_j5 | 3.33062    | 3.60411   | 0             | 1         | 1         |
| Vcl_j1           | 6.18194    | 8.11463   | 0             | 1         | 1         |
| Adk_j1           | 21.5861    | 21.9827   | 0.0262624     | 0.860512  | 0.955855  |
| Myst4_j4         | 0.426419   | 0.549475  | 0             | 1         | 1         |
| Samd8_j1         | 0.339273   | 0.782982  | 0             | 1         | 1         |
| Samd8_j2         | 0.00160618 | 0.283386  | 0             | 1         | 1         |
| Rps24_j4         | 2.13929    | 1.87981   | 0             | 1         | 1         |
| Ppif_j1          | 2.23151    | 1.93558   | -0.205253     | 0.649424  | 0.865303  |
| Il17rd_j3        | 5.67E-05   | 0.289422  | 12.3174       | 0.899682  | 0.967998  |
| D14Abb1e_j4      | 0.14769    | 0.268664  | 0.863229      | 0.0088648 | 0.0782984 |
| Erc2_j13         | 0          | 1.12774   | 0             | 1         | 1         |
| Wnt5a            | 0.0591779  | 0.417712  | 0             | 1         | 1         |
| Actr8_j1         | 15.2937    | 15.0741   | -0.0208721    | 0.847215  | 0.951638  |
| Tkt_j8           | 1.14151    | 2.27054   | 0             | 1         | 1         |
| Nek4_j1          | 1.21646    | 0.994505  | -0.290643     | 0.281209  | 0.629634  |
| Nek4_j3          | 1.60903    | 1.35087   | -0.252301     | 0.341611  | 0.68153   |
| Pbrm1_j4         | 0.801672   | 0.714922  | 0             | 1         | 1         |
| Pbrm1_j3         | 1.68602    | 2.1971    | 0             | 1         | 1         |
| Tnnc1_j1         | 0          | 0.301213  | 0             | 1         | 1         |
| Tnnc1_j5         | 0.364547   | 2.69036   | 0             | 1         | 1         |
| Bap1_j1          | 0.0647704  | 0.0950223 | 0.552931      | 0.645982  | 1         |
| Erc6_j7          | 0.108295   | 0         | -1.79769e+308 | 4.76E-06  | 1         |
| Prrxl1_j1        | 0.569107   | 0.557135  | 0             | 1         | 1         |
| 1810011H11Rik_j2 | 4.65E-06   | 0.332815  | 16.1256       | 0.996748  | 0.999085  |
| Grid1_j2         | 0.273009   | 0.61087   | 1.16192       | 0.0143691 | 0.111552  |
| XLOC_009634      | 0.0369318  | 0.187914  | 2.34714       | 0.248772  | 0.59633   |
| Gm8104_j2        | 0.13457    | 0.140603  | 0.0632647     | 0.950958  | 1         |
| Ptger2_j1        | 0.143385   | 0.147112  | 0.037028      | 0.970986  | 0.991858  |
| XLOC_009649      | 0.0405738  | 0.133963  | 1.72321       | 0.359404  | 1         |
| Socs4_j1         | 0          | 0.0593628 | 0             | 1         | 1         |
| Ktn1_j1          | 0          | 0.618887  | 0             | 1         | 1         |
| Ktn1_j10         | 1.28999    | 0         | 0             | 1         | 1         |
| Ktn1_j11         | 9.32472    | 18.862    | 0             | 1         | 1         |
| Mudeng_j1        | 1.71736    | 1.21157   | -0.503309     | 0.0829056 | 0.350922  |
| Pnp_j3           | 2.1882     | 4.02218   | 0.878232      | 0.0019029 | 0.0240105 |
| Rnase4_j3        | 10.0148    | 23.8995   | 0             | 1         | 1         |
| Mett11d1_j8      | 1.20019    | 1.11307   | -0.108719     | 0.750393  | 0.913378  |
| Slc39a2_j4       | 0          | 0.0921014 | 1.79769e+308  | 0.101339  | 1         |
| Arhgef40_j6      | 0.0578935  | 0.147407  | 0             | 1         | 1         |



|             |           |           |              |           |           |
|-------------|-----------|-----------|--------------|-----------|-----------|
| Arhgef40_j7 | 3.333     | 4.29492   | 0            | 1         | 1         |
| Trdv1       | 0.0384638 | 0.146722  | 1.93151      | 0.0343076 | 1         |
| Tcrd_j1     | 0         | 0.242169  | 1.79769e+308 | 0.0164162 | 0.122653  |
| Tcra_j4     | 1.89E-05  | 0.310209  | 14.0032      | 0.99064   | 0.997044  |
| Mmp14_j2    | 0.063433  | 0.335657  | 2.40368      | 0.0010138 | 0.0144661 |
| Pabpn1_j1   | 1.20067   | 1.04534   | -0.199871    | 0.214342  | 0.559705  |
| Pabpn1_j3   | 0.532979  | 0.473359  | -0.171143    | 0.459113  | 0.761406  |
| Cmtm5       | 14.7218   | 14.4987   | -0.0220308   | 0.883555  | 0.963043  |
| Cmtm5_j6    | 2.52598   | 2.25833   | -0.161591    | 0.514042  | 0.793041  |
| Cmtm5_j7    | 0.21371   | 0.274855  | 0.363016     | 0.258755  | 0.60754   |
| Ngdn_j2     | 0         | 0.20161   | 1.79769e+308 | 0.0456883 | 0.24468   |
| Lrrc16b_j1  | 1.14246   | 1.12887   | 0            | 1         | 1         |
| Lrrc16b_j4  | 6.74593   | 6.65837   | 0            | 1         | 1         |
| Cpne6_j6    | 5.92313   | 7.55215   | 0.350527     | 0.03465   | 0.204438  |
| Cpne6_j5    | 133.652   | 126.313   | -0.0814825   | 0.346376  | 0.685483  |
| Dcaf11_j2   | 0.793785  | 0.82202   | 0.0504251    | 0.871524  | 0.959237  |
| Dcaf11_j1   | 0.203358  | 0.168284  | -0.273122    | 0.664788  | 0.873063  |
| Dcaf11_j6   | 0         | 0.0852467 | 1.79769e+308 | 0.136888  | 1         |
| Nfatc4_j1   | 0         | 0.050978  | 1.79769e+308 | 0.0530081 | 1         |
| Nfatc4      | 0.0381392 | 0.252978  | 2.72966      | 0.0006029 | 0.0095225 |
| Rnf17_j1    | 0.0377803 | 0.0932198 | 1.303        | 0.340304  | 1         |
| Rnf17_j3    | 0.0341562 | 0.119562  | 1.80754      | 0.363841  | 1         |
| Parp4_j1    | 2.13259   | 2.25061   | 0            | 1         | 1         |
| Parp4_j3    | 2.68391   | 6.59831   | 0            | 1         | 1         |
| XLOC_009723 | 0.0650716 | 0.121564  | 0.901611     | 0.490069  | 1         |
| Ift88_j1    | 3.1892    | 3.23602   | 0.0210278    | 0.911347  | 0.972265  |
| Rcbtb1_j2   | 0         | 0.468654  | 0            | 1         | 1         |
| Spata13_j2  | 0.336219  | 1.05081   | 0            | 1         | 1         |
| Trim13_j2   | 2.33515   | 1.77763   | -0.393563    | 0.15644   | 0.489919  |
| Kcng        | 0.150442  | 0.169733  | 0.17406      | 0.663697  | 0.872653  |
| Serpine3_j1 | 0.157485  | 0.154912  | 0            | 1         | 1         |
| Wdfy2_j4    | 0.850981  | 0.585172  | 0            | 1         | 1         |
| Prss51_j1   | 0.041354  | 0.31884   | 2.94673      | 0.0039135 | 0.0422463 |
| Kif13b_j1   | 0.26363   | 0.194387  | 0            | 1         | 1         |
| Zfp395_j5   | 0.25804   | 0.759597  | 1.55764      | 6.70E-06  | 0.0002193 |
| XLOC_009765 | 0.0580483 | 0.120333  | 1.05171      | 0.32183   | 1         |
| Clu_j3      | 0         | 0.706607  | 1.79769e+308 | 0.0001783 | 0.0034906 |
| Pnma2_j2    | 2.53379   | 1.48061   | 0            | 1         | 1         |
| XLOC_009773 | 0.135722  | 0.264293  | 0.961487     | 0.165587  | 0.502238  |
| Entpd4_j1   | 2.623     | 1.6844    | -0.638983    | 0.0002353 | 0.0043846 |
| AK133329_j3 | 0.0978269 | 0.114199  | 0.223248     | 0.871611  | 1         |
| Nudt18_j2   | 2.04824   | 2.60561   | 0.347237     | 0.125625  | 0.441544  |
| Dok2_j1     | 0.031202  | 0.0799946 | 1.35826      | 0.32207   | 1         |
| Gfra2_j4    | 0         | 0.104044  | 0            | 1         | 1         |
| Med4_j1     | 7.27299   | 8.51035   | 0.226669     | 0.137967  | 0.461744  |
| XLOC_009802 | 0.0707375 | 0.142681  | 1.01225      | 0.200165  | 1         |
| Esd_j4      | 8.45365   | 13.7484   | 0            | 1         | 1         |

|                  |           |           |              |           |           |
|------------------|-----------|-----------|--------------|-----------|-----------|
| Lcp1             | 30.0321   | 23.2847   | 0            | 1         | 1         |
| Tpt1_j1          | 9.81753   | 10.2833   | 0.0668648    | 0.561732  | 0.821809  |
| XLOC_009813      | 0.0720395 | 0.1305    | 0.85719      | 0.297573  | 1         |
| Enox1_j2         | 1.50624   | 1.2842    | 0            | 1         | 1         |
| Epsti1_j1        | 0         | 0.0836256 | 1.79769e+308 | 0.0650143 | 1         |
| Sugt1_j2         | 14.8543   | 18.2224   | 0.294828     | 0.0235742 | 0.157686  |
| Olfm4_j3         | 2.04E-05  | 0.183367  | 13.1322      | 0.975417  | 0.992893  |
| Olfm4_j4         | 0.214147  | 0.195041  | -0.134821    | 0.826936  | 0.94428   |
| Tdrd3_j9         | 0.839243  | 1.04363   | 0.314447     | 0.381774  | 0.712068  |
| 6720463M24Rik_j1 | 0         | 0.143478  | 1.79769e+308 | 4.95E-05  | 1         |
| Uchl3_j7         | 0.189617  | 0.126514  | -0.583792    | 0.641384  | 0.861715  |
| Lmo7_j3          | 0         | 0.0616645 | 1.79769e+308 | 0.0322411 | 1         |
| Lmo7_j4          | 0         | 0.68669   | 1.79769e+308 | 6.87E-11  | 7.23E-09  |
| XLOC_009838      | 0.317726  | 0.268936  | -0.240522    | 0.6059    | 0.844806  |
| XLOC_009838      | 0.316425  | 0.192489  | -0.717085    | 0.154508  | 0.48769   |
| XLOC_009838      | 0.509831  | 0.69374   | 0.444376     | 0.160529  | 0.495121  |
| Scel_j6          | 0.0832431 | 0.296793  | 1.83406      | 0.0111107 | 0.0926604 |
| FJ744746_j3      | 0.0671914 | 0.075013  | 0.158863     | 0.915107  | 1         |
| FJ744746_j6      | 0.0222283 | 0.086445  | 1.95938      | 0.413164  | 1         |
| Gpc6_j2          | 0.616806  | 0.456891  | -0.432968    | 0.134482  | 0.456349  |
| Gpr180_j1        | 0.278072  | 1.03758   | 0            | 1         | 1         |
| Hs6st3_j2        | 2.75163   | 2.86929   | 0            | 1         | 1         |
| XLOC_009864      | 0         | 0.0523422 | 1.79769e+308 | 0.0920875 | 1         |
| Tm9sf2_j5        | 3.40102   | 4.07676   | 0            | 1         | 1         |
| AK041589_j1      | 0.09689   | 0.0661145 | -0.55138     | 0.757807  | 1         |
| Fam107a          | 0.1222    | 0.110228  | -0.148762    | 0.84541   | 1         |
| 4930452B06Rik_j2 | 0.125154  | 0.475852  | 0            | 1         | 1         |
| Fhit_j8          | 0.0478853 | 0.185448  | 1.95336      | 0.498204  | 0.783887  |
| Fhit_j9          | 0.0268657 | 0.168511  | 2.649        | 0.530459  | 0.803081  |
| Cadps_j7         | 32.7772   | 33.0787   | 0            | 1         | 1         |
| Cadps_j14        | 1.97257   | 1.12908   | 0            | 1         | 1         |
| Thoc7_j6         | 6.45813   | 7.0847    | 0            | 1         | 1         |
| Psm6_j1          | 22.1266   | 21.3754   | -0.04983     | 0.71741   | 0.89808   |
| Lrrc3b_j4        | 2.86549   | 4.70052   | 0            | 1         | 1         |
| Gng2_j2          | 0         | 0.330734  | 1.79769e+308 | 8.30E-05  | 0.001831  |
| XLOC_009903      | 0.0972514 | 0.356254  | 1.87312      | 0.0066357 | 0.0631794 |
| Kcnk16_j4        | 0         | 0.661524  | 0            | 1         | 1         |
| Kcnk16           | 0.218314  | 0.555647  | 0            | 1         | 1         |
| Ttc18_j9         | 0.0564035 | 0.0911789 | 0.692915     | 0.633445  | 1         |
| Zmynd17_j3       | 0.0913386 | 0.110947  | 0.280573     | 0.820413  | 1         |
| Zmynd17_j1       | 0         | 0.0796189 | 1.79769e+308 | 0.0648981 | 1         |
| Ppp3cb_j6        | 19.0564   | 16.3459   | 0            | 1         | 1         |
| Camk2g_j2        | 0.946119  | 0.196668  | 0            | 1         | 1         |
| Camk2g_j6        | 0.394739  | 0.340606  | 0            | 1         | 1         |
| Ap3m1_j4         | 0.377525  | 0.252492  | -0.580332    | 0.602331  | 0.842837  |
| Ap3m1_j5         | 1.50144   | 1.60149   | 0.093071     | 0.824729  | 0.943424  |
| Slmap_j7         | 4.65232   | 3.24436   | 0            | 1         | 1         |

|                  |            |           |              |           |           |
|------------------|------------|-----------|--------------|-----------|-----------|
| Appl1_j5         | 7.47811    | 7.24892   | 0            | 1         | 1         |
| Ccdc66_j1        | 0.803584   | 0.848341  | 0.0781965    | 0.756576  | 0.916114  |
| Cacna2d3_j4      | 0          | 0.0703343 | 0            | 1         | 1         |
| Cacna1d_j6       | 0.106749   | 0.104553  | 0            | 1         | 1         |
| Cacna1d_j5       | 0          | 0.0550135 | 0            | 1         | 1         |
| Cacna1d_j11      | 0.0159727  | 0.0956176 | 0            | 1         | 1         |
| Cacna1d_j12      | 0.0994311  | 0.0769048 | 0            | 1         | 1         |
| Prkcd_j1         | 71.0121    | 75.3068   | 0            | 1         | 1         |
| Itih3_j1         | 0.034048   | 0.0872536 | 1.35765      | 0.512535  | 1         |
| Itih3_j4         | 0          | 0.107491  | 1.79769e+308 | 0.0857013 | 1         |
| Itih3_j9         | 0.040807   | 0.133738  | 1.71252      | 0.270753  | 1         |
| Itih3_j10        | 0.00829745 | 0.0639299 | 2.94575      | 0.422632  | 1         |
| 2010107H07Rik_j1 | 0.290207   | 0.280975  | 0            | 1         | 1         |
| Stab1_j1         | 1.51959    | 3.1443    | 1.04905      | 1.97E-07  | 9.75E-06  |
| Stab1_j9         | 0          | 0.113763  | 1.79769e+308 | 0.0006554 | 1         |
| Nisch_j4         | 28.4074    | 36.5104   | 0            | 1         | 1         |
| Dnahc1_j1        | 0          | 0.0924366 | 1.79769e+308 | 0.0910689 | 1         |
| Dph3             | 0.971345   | 1.50326   | 0.630041     | 0.0127316 | 0.102443  |
| Wdfy4_j4         | 0.102469   | 0.1544    | 0.591476     | 0.362655  | 1         |
| Wdfy4_j7         | 0.0533853  | 0.212097  | 1.99021      | 0.077569  | 0.337104  |
| XLOC_009960      | 0.0755768  | 0.105375  | 0.479523     | 0.633239  | 1         |
| Fam35a_j11       | 0.0695378  | 0.0954441 | 0.456857     | 0.616069  | 1         |
| Fam35a_j12       | 0.491252   | 0.416002  | -0.239873    | 0.526815  | 0.801222  |
| Fam35a_j6        | 0          | 0.167761  | 1.79769e+308 | 5.33E-05  | 0.0012613 |
| Ldb3_j3          | 0.200554   | 0.511265  | 0            | 1         | 1         |
| Opn4_j3          | 0          | 0.198672  | 1.79769e+308 | 0.029381  | 0.183133  |
| Gcap14_j4        | 3.96599    | 3.93629   | 0            | 1         | 1         |
| Sh2d4b_j3        | 0.378727   | 0.350071  | 0            | 1         | 1         |
| Sh2d4b_j4        | 0.270158   | 0.148733  | 0            | 1         | 1         |
| Tspan14_j5       | 0.467247   | 0.244362  | 0            | 1         | 1         |
| Txndc16_j8       | 0.860024   | 1.1532    | 0.423194     | 0.11518   | 0.422095  |
| Gnpnat1_j4       | 0.324259   | 0.437995  | 0.43377      | 0.204468  | 0.548611  |
| Gnpnat1_j5       | 0.610737   | 1.58911   | 1.3796       | 1.73E-09  | 1.40E-07  |
| Fermt2_j3        | 5.09239    | 5.0313    | 0            | 1         | 1         |
| Ddhd1_j3         | 0          | 0.0536731 | 1.79769e+308 | 0.0214416 | 1         |
| Ddhd1_j11        | 2.98481    | 3.46842   | 0.216641     | 0.0695432 | 0.316258  |
| XLOC_009988      | 0.0716792  | 0.123921  | 0.789791     | 0.42723   | 1         |
| XLOC_009988      | 0          | 0.108253  | 1.79769e+308 | 0.0405486 | 1         |
| Cnih_j2          | 78.2461    | 68.5006   | -0.191901    | 0.0472549 | 0.249533  |
| Gch1_j1          | 0          | 0.0968967 | 1.79769e+308 | 0.0464673 | 1         |
| Wdhd1_j5         | 0          | 0.202021  | 1.79769e+308 | 0.0130153 | 0.104227  |
| Atg14_j3         | 1.01403    | 1.36866   | 0            | 1         | 1         |
| Exoc5_j1         | 8.90133    | 8.58637   | -0.0519718   | 0.707171  | 0.893202  |
| Exoc5_j2         | 0.47914    | 0.875383  | 0.869465     | 2.21E-05  | 0.0006002 |
| Exoc5_j3         | 0          | 0.0542124 | 1.79769e+308 | 0.0040661 | 1         |
| Slc35f4          | 2.16841    | 1.75867   | -0.302151    | 0.216752  | 0.562923  |
| 3632451O06Rik_j4 | 44.1382    | 60.3087   | 0            | 1         | 1         |

|                  |           |           |              |           |           |
|------------------|-----------|-----------|--------------|-----------|-----------|
| Tep1_j3          | 1.21697   | 1.71681   | 0.496436     | 0.187059  | 0.528052  |
| Ndr2_j8          | 0         | 0.368923  | 0            | 1         | 1         |
| Ndr2_j9          | 0.224455  | 0.498607  | 0            | 1         | 1         |
| Zfp219_j4        | 10.3842   | 10.4981   | 0.0157508    | 0.893828  | 0.966325  |
| Chd8_j6          | 1.59519   | 2.03567   | 0.35177      | 0.0247118 | 0.162971  |
| Chd8_j7          | 2.12115   | 1.875     | -0.177961    | 0.163245  | 0.498589  |
| Slc7a7_j2        | 28.957    | 35.0521   | 0.275588     | 0.0146778 | 0.113118  |
| Prmt5_j2         | 0.48815   | 0.879644  | 0            | 1         | 1         |
| Cdh24_j4         | 0.247534  | 0.219511  | -0.173334    | 0.751292  | 0.913895  |
| Cdh24_j7         | 0.12263   | 0.146892  | 0.260452     | 0.7411    | 1         |
| Acin1_j2         | 0         | 0.235242  | 0            | 1         | 1         |
| Acin1_j3         | 0.739633  | 0.737068  | 0            | 1         | 1         |
| Slc7a8_j1        | 3.98467   | 5.68821   | 0            | 1         | 1         |
| Slc22a17_j9      | 8.26207   | 5.8009    | 0            | 1         | 1         |
| Slc22a17_j4      | 39.0217   | 32.3842   | 0            | 1         | 1         |
| Ap1g2_j1         | 0.185459  | 0.131354  | 0            | 1         | 1         |
| Nedd8_j3         | 0         | 6.38993   | 0            | 1         | 1         |
| Rabggta_j2       | 1.00384   | 1.58013   | 0.654511     | 0.0274715 | 0.175332  |
| Adcy4            | 0.25616   | 0.40552   | 0.662727     | 0.0714551 | 0.321458  |
| Pspc1_j3         | 6.74701   | 6.73996   | 0            | 1         | 1         |
| Zmym5_j3         | 0.226821  | 0.352847  | 0            | 1         | 1         |
| Xpo4_j4          | 0.157999  | 0.216976  | 0.457621     | 0.460666  | 0.762129  |
| Xpo4_j5          | 0.0239678 | 0.12719   | 2.40782      | 0.0421662 | 1         |
| Lats2_j3         | 4.67594   | 5.24239   | 0            | 1         | 1         |
| Zdhhc20          | 0.192285  | 0.340733  | 0            | 1         | 1         |
| Setdb2_j3        | 0.0375971 | 0.0483547 | 0.363035     | 0.752836  | 1         |
| Setdb2_j2        | 0         | 0.310708  | 1.79769e+308 | 1.34E-05  | 0.0003977 |
| Atp8a2_j5        | 0         | 1.20483   | 0            | 1         | 1         |
| Kpna3_j1         | 0.104328  | 0         | 0            | 1         | 1         |
| 6330409N04Rik_j2 | 13.4391   | 13.159    | -0.030388    | 0.849543  | 0.952228  |
| Neil2_j4         | 1.52776   | 1.28068   | -0.254503    | 0.505231  | 0.788165  |
| Neil2_j5         | 0         | 0.111865  | 1.79769e+308 | 0.128205  | 1         |
| Msra_j5          | 0         | 0.52651   | 0            | 1         | 1         |
| Hmbox1_j3        | 15.2309   | 18.2397   | 0            | 1         | 1         |
| Hmbox1_j5        | 1.71612   | 0.652167  | 0            | 1         | 1         |
| Extl3_j3         | 0.694896  | 0.470574  | 0            | 1         | 1         |
| Extl3_j4         | 0.09816   | 0.0502971 | 0            | 1         | 1         |
| Extl3_j5         | 0.160848  | 0.589578  | 0            | 1         | 1         |
| Pnoc_j1          | 0         | 0.0641523 | 1.79769e+308 | 0.112568  | 1         |
| Ptk2b_j3         | 1.78756   | 3.35051   | 0            | 1         | 1         |
| Dpysl2_j4        | 23.8404   | 22.6599   | -0.0732671   | 0.433551  | 0.744887  |
| Nefm_j5          | 1.11611   | 0.515976  | -1.11311     | 0.0104555 | 0.0883454 |
| Slc25a37_j2      | 0.688904  | 0.48092   | 0            | 1         | 1         |
| R3hcc1_j1        | 0.132433  | 0.348522  | 0            | 1         | 1         |
| Rhobtb2_j3       | 0.733644  | 0.906757  | 0            | 1         | 1         |
| Sorbs3_j4        | 2.62915   | 2.87932   | 0            | 1         | 1         |
| Slc39a14_j2      | 0         | 0.122549  | 0            | 1         | 1         |

|                  |            |                        |           |           |           |
|------------------|------------|------------------------|-----------|-----------|-----------|
| Slc39a14_j3      | 0.276794   | 0.385413               | 0         | 1         | 1         |
| Fam160b2_j1      | 2.45489    | 2.17491                | 0         | 1         | 1         |
| Fam160b2_j2      | 0.0409414  | 0.0695373              | 0         | 1         | 1         |
| Fam160b2_j3      | 0.141154   | 0.184659               | 0         | 1         | 1         |
| Epb4.9_j5        | 39.6664    | 35.5383                | 0         | 1         | 1         |
| Epb4.9_j8        | 36.9292    | 31.537                 | 0         | 1         | 1         |
| Fndc3a_j6        | 0          | 0.667702               | 0         | 1         | 1         |
| Cysltr2_j8       | 0.490097   | 0.211985               | -1.2091   | 0.0190455 | 0.136262  |
| Cysltr2_j6       | 0.731376   | 0.496666               | -0.558338 | 0.123187  | 0.436948  |
| Rb1_j1           | 3.45799    | 3.96504                | 0         | 1         | 1         |
| 9030625A04Rik_j3 | 0.170324   | 0.119047               | -0.51675  | 0.538918  | 0.80821   |
| Akap11_j5        | 1.82549    | 3.78782                | 0         | 1         | 1         |
| Naa16_j3         | 0          | 0.0686136 1.79769e+308 |           | 0.0254402 | 1         |
| Wbp4_j2          | 0.768327   | 0.578493               | -0.40942  | 0.308036  | 0.653037  |
| Diap3_j5         | 0          | 0.118334 1.79769e+308  |           | 0.0993814 | 1         |
| Diap3_j6         | 0          | 0.101334 1.79769e+308  |           | 0.108752  | 1         |
| Pcdh9_j3         | 0          | 0.107677 1.79769e+308  |           | 0.142847  | 1         |
| Klf12_j1         | 1.01109    | 0.867162               | -0.221544 | 0.218768  | 0.565038  |
| Klf12_j3         | 0          | 0.0648809 1.79769e+308 |           | 0.0017526 | 1         |
| Tbc1d4           | 0.00245337 | 0.407428               | 0         | 1         | 1         |
| Mycbp2_j12       | 6.38095    | 8.51027                | 0.415434  | 0.0364331 | 0.211083  |
| Mycbp2_j13       | 0.744699   | 0.391211               | -0.928712 | 1.57E-05  | 0.0004558 |
| AK047857_j1      | 0.976798   | 0.638726               | -0.612865 | 0.0355867 | 0.207851  |
| Tgds             | 0          | 0.375444 1.79769e+308  |           | 0.0012333 | 0.0168983 |
| Abcc4_j1         | 0.80537    | 0.43453                | 0         | 1         | 1         |
| Dzip1_j3         | 0.197762   | 0.294719               | 0         | 1         | 1         |
| Dzip1_j2         | 0.502622   | 0.43293                | 0         | 1         | 1         |
| Dock9_j1         | 7.0445     | 7.70607                | 0.129499  | 0.425712  | 0.740663  |
| Dock9_j2         | 0.236647   | 0.107502               | -1.13838  | 0.0975481 | 0.385892  |
| Dock9_j3         | 1.17635    | 1.23679                | 0.0722793 | 0.700849  | 0.890006  |
| Tmtc4_j1         | 1.04991    | 2.29452                | 0         | 1         | 1         |
| Tmtc4_j2         | 0.0379551  | 0.0558266              | 0         | 1         | 1         |
| Nalcn_j6         | 0          | 0.193999 1.79769e+308  |           | 2.21E-05  | 0.0005998 |
| Flnb_j4          | 1.07346    | 1.332                  | 0         | 1         | 1         |
| Kctd6_j1         | 0.105146   | 0.0893499              | -0.234852 | 0.821479  | 1         |
| Kctd6_j3         | 0.442927   | 0.288441               | -0.618793 | 0.252982  | 0.600981  |
| Kctd6_j4         | 0.203087   | 0.366168               | 0.850408  | 0.13314   | 0.454156  |
| Synpr_j2         | 1.22428    | 1.27191                | 0.0550623 | 0.924179  | 0.976334  |
| Il3ra_j1         | 0.0530631  | 0.0648634              | 0.289696  | 0.778289  | 1         |
| Thrb_j5          | 1.15E-05   | 0.0975073              | 13.0491   | 0.96529   | 1         |
| Fam149b_j1       | 2.20184    | 2.55789                | 0.216246  | 0.179732  | 0.519398  |
| Sec24c_j11       | 0.096579   | 0.0615072              | -0.650954 | 0.275387  | 1         |
| 2310021P13Rik_j3 | 0          | 0.0783641              | 0         | 1         | 1         |
| Vdac2_j4         | 3.10747    | 2.79187                | 0         | 1         | 1         |
| 1700112E06Rik_j7 | 0.196906   | 0.177575               | -0.149071 | 0.899792  | 0.968073  |
| 1700112E06Rik_j8 | 4.18E-05   | 0.592719               | 13.7923   | 0.985576  | 0.995707  |
| Rps24_j8         | 1.90908    | 1.36103                | 0         | 1         | 1         |

|                  |            |           |              |           |           |
|------------------|------------|-----------|--------------|-----------|-----------|
| Zmiz1            | 0.721      | 1.2911    | 0.840534     | 0.0002027 | 0.0038805 |
| Zmiz1_j4         | 0.00207404 | 0.0764645 | 5.20427      | 0.113873  | 1         |
| Anxa11_j1        | 6.52154    | 6.28163   | -0.0540731   | 0.753205  | 0.914692  |
| Duxbl_j1         | 0.432927   | 0.531863  | 0.296932     | 0.416798  | 0.733917  |
| Fam116a_j2       | 0.137367   | 0.118474  | 0            | 1         | 1         |
| Fam116a_j3       | 0.44312    | 0.474943  | 0            | 1         | 1         |
| Il17rd           | 0.0716294  | 0.149899  | 1.06537      | 0.0999156 | 1         |
| Arhgef3_j1       | 1.39553    | 1.20051   | 0            | 1         | 1         |
| Erc2_j14         | 0          | 0.420193  | 0            | 1         | 1         |
| Selk_j3          | 44.9196    | 47.9109   | 0.0930075    | 0.395426  | 0.720525  |
| Chdh_j1          | 0.156573   | 0.180826  | 0            | 1         | 1         |
| Tkt_j4           | 0          | 0.22516   | 0            | 1         | 1         |
| Tmem110_j3       | 0.158476   | 0.241481  | 0.607646     | 0.301233  | 0.647609  |
| Nek4_j2          | 1.10136    | 1.0481    | -0.0715093   | 0.835259  | 0.946964  |
| Pbrm1_j1         | 0.686271   | 0.742375  | 0            | 1         | 1         |
| Bap1_j2          | 5.12995    | 6.30163   | 0.296781     | 0.0635588 | 0.298867  |
| Galnt12_j3       | 0.456897   | 0.538616  | 0.237388     | 0.374842  | 0.707307  |
| Parg_j1          | 0.760663   | 0.597277  | 0            | 1         | 1         |
| Ogdhl_j3         | 1.56085    | 1.12236   | 0            | 1         | 1         |
| Erc6_j8          | 5.22E-05   | 0.137109  | 11.3603      | 0.837012  | 1         |
| Prrxl1_j2        | 4.32267    | 3.37037   | 0            | 1         | 1         |
| XLOC_009619      | 0.0415444  | 0.0598273 | 0.526152     | 0.75834   | 1         |
| Gdf10            | 0.0965923  | 0.112894  | 0.224994     | 0.760359  | 1         |
| Syt15_j3         | 0.0695113  | 0.0249225 | -1.4798      | 0.255033  | 1         |
| Syt15_j6         | 0          | 0.23257   | 1.79769e+308 | 0.0008391 | 0.0124502 |
| Wapal_j2         | 4.78998    | 4.54387   | 0            | 1         | 1         |
| XLOC_009634      | 0.114367   | 0.443395  | 1.95493      | 0.0699953 | 0.317567  |
| XLOC_009649      | 0.0836469  | 0.149218  | 0.835035     | 0.132434  | 1         |
| Samd4_j1         | 0.00917808 | 0.266987  | 4.86243      | 0.350381  | 0.687791  |
| Samd4_j4         | 0          | 0.0550759 | 1.79769e+308 | 0.112262  | 1         |
| Ktn1_j2          | 0.0588604  | 1.94123   | 0            | 1         | 1         |
| Ktn1_j8          | 2.26936    | 4.43517   | 0            | 1         | 1         |
| Parp2_j1         | 0.753392   | 0.88903   | 0.238832     | 0.479105  | 0.773493  |
| Mett11d1_j5      | 0.620289   | 0.534541  | -0.214639    | 0.721949  | 0.900833  |
| Mett11d1         | 0.91653    | 1.30401   | 0.508695     | 0.172786  | 0.510409  |
| G630016D24Rik_j1 | 0.138282   | 0.111302  | -0.313133    | 0.644036  | 0.862786  |
| Tox4_j1          | 6.72655    | 6.26829   | -0.101795    | 0.354861  | 0.690914  |
| Mrpl52_j1        | 12.6946    | 16.5073   | 0.378883     | 0.163991  | 0.499725  |
| Lrp10_j3         | 11.412     | 13.69     | 0            | 1         | 1         |
| Pabpn1           | 0.33979    | 0.517612  | 0.607229     | 0.0328912 | 0.197493  |
| Pabpn1_j4        | 36.9582    | 42.3434   | 0.196241     | 0.0476874 | 0.250838  |
| Pabpn1_j7        | 0          | 0.319047  | 1.79769e+308 | 0.0051112 | 0.0515663 |
| Lrrc16b_j5       | 0.298181   | 0.351782  | 0            | 1         | 1         |
| Lrrc16b_j7       | 4.08272    | 3.89193   | 0            | 1         | 1         |
| Lrrc16b_j6       | 3.24815    | 3.34008   | 0            | 1         | 1         |
| Cpne6_j1         | 0          | 0.129475  | 1.79769e+308 | 0.0185392 | 1         |
| Rnf31_j6         | 0.882914   | 1.47992   | 0            | 1         | 1         |

|                  |             |           |              |           |           |
|------------------|-------------|-----------|--------------|-----------|-----------|
| Rec8_j4          | 0           | 0.0562523 | 1.79769e+308 | 0.18424   | 1         |
| Nfatc4_j6        | 0.0212577   | 0.0751733 | 1.82223      | 0.40664   | 1         |
| Mphosph8_j1      | 7.11462     | 5.54453   | 0            | 1         | 1         |
| XLOC_009723      | 0.0630702   | 0.155601  | 1.30282      | 0.0398294 | 1         |
| Mrp63_j1         | 20.1307     | 20.0036   | -0.00913327  | 0.957971  | 0.987996  |
| Fgf9_j1          | 0.683308    | 0.679163  | 0            | 1         | 1         |
| Fgf9_j2          | 0.737767    | 0.946578  | 0            | 1         | 1         |
| Fgf9_j4          | 1.84826     | 1.57762   | 0            | 1         | 1         |
| Rcctb1_j1        | 0           | 0.493884  | 0            | 1         | 1         |
| Spata13_j1       | 1.91665     | 2.78939   | 0            | 1         | 1         |
| C1qtnf9_j1       | 0.146412    | 0.300737  | 1.03847      | 0.0391095 | 0.220626  |
| Mipep_j1         | 4.21746     | 3.41079   | -0.306267    | 0.116729  | 0.424896  |
| Sacs             | 0.918919    | 0.40071   | -1.19738     | 2.15E-08  | 1.40E-06  |
| XLOC_009743      | 0.0922488   | 0.303728  | 1.71918      | 0.086564  | 0.359624  |
| Rnaseh2b_j3      | 0           | 0.178643  | 1.79769e+308 | 0.0540178 | 0.270834  |
| Wdfy2_j2         | 0.000253522 | 0.463279  | 0            | 1         | 1         |
| Wdfy2_j6         | 1.61811     | 1.76079   | 0            | 1         | 1         |
| Ctsb_j4          | 563.69      | 700.993   | 0            | 1         | 1         |
| AK044422_j2      | 21.2387     | 19.8179   | -0.0998923   | 0.290909  | 0.638208  |
| Kif13b_j6        | 0.137204    | 0.304858  | 0            | 1         | 1         |
| XLOC_009765      | 0.0600059   | 0.0925655 | 0.625369     | 0.543557  | 1         |
| Clu_j1           | 0.162148    | 1.2912    | 2.99332      | 9.31E-06  | 0.0002919 |
| Trim35_j1        | 29.5508     | 36.5652   | 0            | 1         | 1         |
| XLOC_009767      | 0.160136    | 0.169028  | 0            | 1         | 1         |
| Kctd9_j3         | 2.59729     | 2.66173   | 0.0353603    | 0.864969  | 0.957021  |
| Lgi3_j3          | 53.7427     | 28.9622   | -0.891898    | 0         | 0         |
| XLOC_009792      | 0           | 0.0738919 | 1.79769e+308 | 0.135672  | 1         |
| Gfra2_j3         | 19.0412     | 17.3371   | 0            | 1         | 1         |
| Rcctb2_j3        | 1.29895     | 0.823917  | 0            | 1         | 1         |
| Rcctb2_j4        | 1.50289     | 2.30608   | 0            | 1         | 1         |
| XLOC_009799      | 0.0837603   | 0.155164  | 0.889457     | 0.437451  | 1         |
| XLOC_009802      | 0           | 0.119572  | 1.79769e+308 | 0.0301917 | 1         |
| Zc3h13_j5        | 0.000240366 | 1.23328   | 0            | 1         | 1         |
| Ccdc122          | 1.70546     | 1.01039   | 0            | 1         | 1         |
| Ccdc122          | 2.22187     | 1.49827   | 0            | 1         | 1         |
| Enox1_j7         | 0.362757    | 0.191412  | 0            | 1         | 1         |
| Enox1_j5         | 0.350438    | 0.308133  | 0            | 1         | 1         |
| Enox1_j6         | 0.397542    | 0.344424  | 0            | 1         | 1         |
| 1300010F03Rik_j2 | 4.59586     | 5.39852   | 0.23223      | 0.173163  | 0.510747  |
| Elf1_j2          | 0.0626839   | 1.48148   | 0            | 1         | 1         |
| 6720463M24Rik_j2 | 0.202737    | 0.194155  | -0.0624041   | 0.938069  | 0.981032  |
| 6720463M24Rik_j4 | 0.234502    | 0.241831  | 0.0444003    | 0.897324  | 0.967349  |
| Lmo7_j6          | 0.553631    | 1.27712   | 1.2059       | 3.03E-07  | 1.44E-05  |
| XLOC_009838      | 0.335797    | 0.192568  | -0.80222     | 0.230846  | 0.577874  |
| Slain1_j1        | 0.90782     | 0.815522  | -0.154682    | 0.614878  | 0.847925  |
| D130009I18Rik_j1 | 1.1347      | 0.688382  | -0.721029    | 0.0039163 | 0.0422576 |
| D130009I18Rik_j2 | 0.861132    | 0.817155  | -0.0756243   | 0.889927  | 0.965032  |

|                  |           |                        |             |           |           |
|------------------|-----------|------------------------|-------------|-----------|-----------|
| D130009I18Rik_j3 | 1.94302   | 1.62366                | -0.259049   | 0.166265  | 0.502849  |
| Ndfip2_j3        | 30.6665   | 21.6918                | 0           | 1         | 1         |
| Gpc5_j4          | 0.152516  | 0.383                  | 1.32838     | 0.0566016 | 0.278347  |
| AK147121_j4      | 0.0687362 | 0.131008               | 0.930513    | 0.398134  | 1         |
| AK147121_j5      | 0.0584415 | 0.149587               | 1.35592     | 0.211449  | 1         |
| AK147121_j6      | 0.3182    | 0.136615               | -1.21981    | 0.148332  | 0.477277  |
| Mbnl2_j1         | 0         | 0.139438 1.79769e+308  |             | 0.0320051 | 1         |
| Mbnl2            | 7.42044   | 5.05522                | -0.553732   | 0.0014415 | 0.0191239 |
| XLOC_009865      | 0.331039  | 0.303057               | -0.127411   | 0.666162  | 0.873522  |
| XLOC_009865      | 0.137102  | 0.167488               | 0.288801    | 0.599733  | 0.841292  |
| AK136126_j2      | 0.0669629 | 0.0904532              | 0.43381     | 0.779681  | 1         |
| AK136126_j1      | 0         | 0.490839 1.79769e+308  |             | 0.0024903 | 0.0297493 |
| AK136126_j3      | 0         | 0.267171 1.79769e+308  |             | 0.0073003 | 0.0680375 |
| AK041589_j3      | 0         | 0.136378 1.79769e+308  |             | 0.0208438 | 1         |
| Dnase1l3_j3      | 1.44883   | 1.95325                | 0.43099     | 0.039374  | 0.221682  |
| Fam107a_j1       | 0.131497  | 0.140958               | 0.100232    | 0.892338  | 1         |
| Fhit_j6          | 0.395603  | 0.317858               | -0.31567    | 0.769498  | 0.921491  |
| Cadps_j12        | 1.03441   | 0.922672               | 0           | 1         | 1         |
| Thoc7_j4         | 0.671825  | 3.29309                | 0           | 1         | 1         |
| Lrrc3b_j3        | 0.371345  | 1.30781                | 0           | 1         | 1         |
| Nr1d2_j1         | 1.02616   | 0.926884               | 0           | 1         | 1         |
| Nr1d2_j2         | 0         | 0.0696686              | 0           | 1         | 1         |
| 2700060E02Rik_j4 | 5.40062   | 5.36793                | -0.00875962 | 0.949282  | 0.985343  |
| Kcnk5_j1         | 0.148768  | 0.756119               | 2.34555     | 5.98E-06  | 0.000198  |
| Ttc18_j2         | 0.0226784 | 0.0467634              | 1.04406     | 0.556287  | 1         |
| Zmynd17_j4       | 0.0477151 | 0.139157               | 1.5442      | 0.141017  | 1         |
| Ndst2_j5         | 0.286921  | 0.751841               | 0           | 1         | 1         |
| Camk2g_j7        | 31.1611   | 50.5704                | 0           | 1         | 1         |
| Camk2g_j9        | 0.815056  | 2.14282                | 0           | 1         | 1         |
| Ap3m1_j1         | 1.04869   | 0.877304               | -0.257435   | 0.210853  | 0.555568  |
| Dlg5_j1          | 3.17867   | 3.57637                | 0           | 1         | 1         |
| Slmap_j8         | 0.231815  | 1.62743                | 0           | 1         | 1         |
| Ccdc66_j3        | 1.03201   | 1.17007                | 0.181144    | 0.383239  | 0.71289   |
| Il17rb_j1        | 0.0868552 | 0.124914               | 0.524247    | 0.265791  | 1         |
| Cacna1d_j4       | 0         | 0.131625               | 0           | 1         | 1         |
| Prkcd_j3         | 10.1545   | 8.70288                | 0           | 1         | 1         |
| Itih3            | 0.207654  | 0.153088               | -0.43982    | 0.446748  | 0.75351   |
| Stab1_j7         | 0.275435  | 0.689071               | 1.32294     | 0.0002199 | 0.0041468 |
| Nisch_j3         | 47.9151   | 58.9524                | 0           | 1         | 1         |
| Phf7_j1          | 0.0334033 | 0.172585               | 2.36924     | 0.0705105 | 0.319172  |
| Dnahc1_j2        | 0.0945553 | 0.108061               | 0.19262     | 0.870828  | 1         |
| Mettl6           | 3.05376   | 3.11228                | 0.0273826   | 0.853229  | 0.953469  |
| Ankrd28_j6       | 1.57652   | 2.33935                | 0           | 1         | 1         |
| Ankrd28_j7       | 0         | 0.208014               | 0           | 1         | 1         |
| Timm23_j2        | 12.0146   | 15.0634                | 0           | 1         | 1         |
| Wdfy4_j2         | 0         | 0.0683588 1.79769e+308 |             | 0.047539  | 1         |
| AK041587_j1      | 0.0853248 | 0.275481               | 1.69092     | 0.116099  | 0.42406   |



|                  |           |           |              |           |           |
|------------------|-----------|-----------|--------------|-----------|-----------|
| Ldb3             | 0.533892  | 0.425729  | 0            | 1         | 1         |
| Sh2d4b_j1        | 0.462363  | 0.704049  | 0            | 1         | 1         |
| Sh2d4b_j2        | 0.369464  | 0.101989  | 0            | 1         | 1         |
| Tspan14_j4       | 4.78179   | 8.07886   | 0            | 1         | 1         |
| Ero1l_j4         | 4.87771   | 4.46554   | 0            | 1         | 1         |
| Gnpnat1_j2       | 0.790437  | 0.586823  | -0.429725    | 0.135106  | 0.457301  |
| Cnih_j4          | 7.77615   | 21.5794   | 1.47252      | 0         | 0         |
| Gmfb_j1          | 23.0839   | 20.7514   | 0            | 1         | 1         |
| Wdhd1_j8         | 0         | 0.338052  | 1.79769e+308 | 0.000162  | 0.0032202 |
| XLOC_009996      | 0.0383066 | 0.204269  | 2.41481      | 0.0070815 | 0.0664784 |
| Exoc5_j5         | 0.151509  | 0.369656  | 1.28678      | 0.0148286 | 0.113954  |
| Slc35f4_j2       | 0         | 0.243376  | 1.79769e+308 | 0.0099675 | 0.08545   |
| 3632451O06Rik_j3 | 3.60857   | 3.97499   | 0            | 1         | 1         |
| Osgep_j4         | 40.4615   | 36.4882   | -0.149119    | 0.133798  | 0.455174  |
| Ndr2_j5          | 0         | 3.20989   | 0            | 1         | 1         |
| Ndr2_j11         | 13.0161   | 12.733    | 0            | 1         | 1         |
| Ndr2_j10         | 9.38651   | 14.2331   | 0            | 1         | 1         |
| Hnrnpc_j2        | 0.141758  | 0.441762  | 0            | 1         | 1         |
| Chd8_j10         | 3.52489   | 4.44767   | 0.335474     | 0.0986056 | 0.388153  |
| Chd8_j11         | 1.78308   | 1.57866   | -0.175667    | 0.266709  | 0.615721  |
| 4931414P19Rik_j1 | 0.225911  | 0.419326  | 0.892315     | 0.196764  | 0.539538  |
| Cdh24_j6         | 0.158922  | 0.261665  | 0.719401     | 0.210655  | 0.555287  |
| Acin1_j1         | 3.41171   | 3.50284   | 0            | 1         | 1         |
| Slc22a17_j7      | 35.4483   | 35.0107   | 0            | 1         | 1         |
| Slc22a17_j8      | 0.110222  | 0.411009  | 0            | 1         | 1         |
| Zfhx2_j5         | 2.26798   | 2.08081   | 0            | 1         | 1         |
| Ap1g2_j4         | 0.680224  | 0.586484  | 0            | 1         | 1         |
| Ap1g2_j6         | 13.7893   | 14.8368   | 0            | 1         | 1         |
| Dhrs1_j4         | 63.6672   | 88.7381   | 0            | 1         | 1         |
| Adcy4_j2         | 0.0751258 | 0.300588  | 2.00041      | 0.0182168 | 0.132057  |
| Adcy4_j7         | 1.74E-05  | 0.118074  | 12.7306      | 0.978517  | 1         |
| Ripk3            | 0.134988  | 0.232158  | 0.782273     | 0.170732  | 0.507662  |
| Sdr39u1_j3       | 0.390072  | 0.683057  | 0            | 1         | 1         |
| Pspc1_j1         | 0.505776  | 0.51223   | 0            | 1         | 1         |
| Zmym5_j4         | 0         | 0.184991  | 0            | 1         | 1         |
| Lats2_j2         | 0.457258  | 0.300469  | 0            | 1         | 1         |
| Setdb2_j1        | 0.116217  | 0.173696  | 0.579749     | 0.344154  | 0.683976  |
| D14Ertd668e      | 0.428416  | 0.550829  | 0.362593     | 0.307758  | 0.652771  |
| Cdad1_j1         | 1.30153   | 1.37363   | 0            | 1         | 1         |
| Atp8a2_j6        | 0         | 0.158303  | 0            | 1         | 1         |
| Atp8a2           | 7.58692   | 11.6588   | 0            | 1         | 1         |
| Tnfrsf19_j2      | 0         | 0.0530017 | 1.79769e+308 | 0.0371147 | 1         |
| Ints6_j6         | 0.985068  | 0.897257  | 0            | 1         | 1         |
| Ints6_j8         | 0.42051   | 0.725779  | 0            | 1         | 1         |
| Fdft1_j1         | 0.416475  | 0.566105  | 0            | 1         | 1         |
| Msra_j3          | 0.100923  | 0.289062  | 0            | 1         | 1         |
| Elp3             | 2.31478   | 3.52328   | 0            | 1         | 1         |

|                  |           |           |              |           |           |
|------------------|-----------|-----------|--------------|-----------|-----------|
| Dock5_j1         | 2.14313   | 1.5608    | 0            | 1         | 1         |
| Slc25a37_j1      | 1.00048   | 1.19094   | 0            | 1         | 1         |
| Rhobtb2_j4       | 0.45046   | 0.307159  | 0            | 1         | 1         |
| 2610301G19Rik_j3 | 0.0271895 | 0.0484012 | 0.831995     | 0.478412  | 1         |
| 2610301G19Rik_j8 | 0.128936  | 0.182844  | 0.50395      | 0.453598  | 0.758086  |
| Pdlim2_j5        | 0.724754  | 0.591201  | -0.293843    | 0.610038  | 0.846292  |
| Slc39a14_j5      | 0         | 0.415925  | 0            | 1         | 1         |
| mKIAA4159        | 3.52526   | 5.80631   | 0            | 1         | 1         |
| Fam160b2_j9      | 0         | 0.183828  | 0            | 1         | 1         |
| Epb4.9_j3        | 13.9933   | 22.2031   | 0            | 1         | 1         |
| Epb4.9_j7        | 0.576651  | 0.329676  | 0            | 1         | 1         |
| Epb4.9_j12       | 29.1098   | 31.4037   | 0            | 1         | 1         |
| Epb4.9_j13       | 0         | 0.0765426 | 0            | 1         | 1         |
| Xpo7_j3          | 2.36261   | 1.65482   | 0            | 1         | 1         |
| Fndc3a           | 0         | 0.0488254 | 0            | 1         | 1         |
| Nudt15_j1        | 0.510105  | 0.652358  | 0.35487      | 0.589268  | 0.836005  |
| Dnajc15_j1       | 0.55856   | 1.06524   | 0            | 1         | 1         |
| Dnajc15_j6       | 0.190535  | 0.943992  | 0            | 1         | 1         |
| Akap11_j6        | 1.34407   | 3.79852   | 0            | 1         | 1         |
| Dgkh_j4          | 16.686    | 15.557    | 0            | 1         | 1         |
| Lect1_j3         | 0.0808012 | 0.063953  | 0            | 1         | 1         |
| XLOC_010149      | 0.0692912 | 0.156721  | 1.17745      | 0.285973  | 1         |
| Klhl1            | 0.0445735 | 0.243252  | 2.44819      | 0.0007823 | 0.0117614 |
| Klf12_j5         | 0         | 0.0968451 | 1.79769e+308 | 0.0001802 | 1         |
| Kctd12           | 2.21781   | 2.92665   | 0.400112     | 0.0039003 | 0.0421503 |
| Mycbp2_j9        | 1.70266   | 2.07314   | 0.284028     | 0.358439  | 0.693853  |
| Mycbp2_j10       | 0.195721  | 0.155873  | -0.32843     | 0.311386  | 0.656124  |
| Rbm26_j4         | 0.564861  | 0.845611  | 0            | 1         | 1         |
| Spry2_j2         | 2.09801   | 1.64219   | -0.353405    | 0.219926  | 0.566665  |
| Abcc4_j2         | 0.0138067 | 0.414966  | 0            | 1         | 1         |
| Dzip1_j10        | 1.65654   | 2.22677   | 0            | 1         | 1         |
| Dzip1_j13        | 0.224229  | 0.149287  | 0            | 1         | 1         |
| Dock9_j8         | 1.16522   | 1.29588   | 0.153324     | 0.532454  | 0.804257  |
| Dock9_j9         | 0.37368   | 0.625022  | 0.742103     | 0.0283206 | 0.178761  |
| Dock9_j10        | 0.542744  | 0.406187  | -0.41813     | 0.147466  | 0.476139  |
| A330035P11Rik_j1 | 0.183647  | 0.174032  | 0            | 1         | 1         |
| Nalcn_j2         | 4.85738   | 4.49179   | -0.112887    | 0.551162  | 0.815748  |
| Flnb_j3          | 0.0836044 | 0.106387  | 0            | 1         | 1         |
| Abhd6            | 8.66582   | 7.92991   | -0.128031    | 0.332358  | 0.67369   |
| Rpp14_j1         | 14.0966   | 12.631    | -0.158388    | 0.174303  | 0.512311  |
| Pxk_j2           | 10.2552   | 10.1587   | -0.0136434   | 0.930276  | 0.978636  |
| 3830406C13Rik_j9 | 0.19888   | 0.175996  | -0.176357    | 0.813386  | 0.939062  |
| Synpr_j3         | 0         | 0.279764  | 1.79769e+308 | 0.0444046 | 0.240368  |
| Synpr_j4         | 0.905818  | 0.914237  | 0.0133476    | 0.969168  | 0.991369  |
| Synpr_j5         | 13.0991   | 14.6897   | 0.16534      | 0.22597   | 0.573193  |
| Slc4a7_j5        | 0.498586  | 0.642248  | 0            | 1         | 1         |
| Ngly1_j1         | 7.88775   | 8.36911   | 0.0854601    | 0.585682  | 0.834044  |

|                  |           |           |              |           |           |
|------------------|-----------|-----------|--------------|-----------|-----------|
| Top2b            | 1.67187   | 0.980195  | 0            | 1         | 1         |
| Top2b_j2         | 0         | 0.807097  | 0            | 1         | 1         |
| Thrb_j4          | 0         | 0.0802676 | 1.79769e+308 | 0.0494324 | 1         |
| 2310021P13Rik_j1 | 0.0409289 | 0.0850618 | 0            | 1         | 1         |
| Myst4_j6         | 0.0869164 | 0.0721786 | 0            | 1         | 1         |
| Myst4_j8         | 0.040427  | 0.214717  | 0            | 1         | 1         |
| Myst4_j10        | 0.0863495 | 0.14652   | 0            | 1         | 1         |
| Vdac2_j1         | 0.351171  | 0.22151   | 0            | 1         | 1         |
| 1700112E06Rik_j2 | 0.46738   | 0.363458  | -0.362809    | 0.771741  | 0.922465  |
| 1700112E06Rik_j6 | 0.0416898 | 0.086073  | 1.04587      | 0.562763  | 1         |
| Rps24_j1         | 1.8208    | 1.9397    | 0            | 1         | 1         |
| XLOC_009578      | 0.110737  | 0.125725  | 0.183145     | 0.806488  | 1         |
| Anxa11_j2        | 6.73038   | 5.45007   | -0.304413    | 0.170166  | 0.507195  |
| Arhgef3_j3       | 0.417597  | 0.180212  | 0            | 1         | 1         |
| D14Abb1e_j2      | 0.0160944 | 0.154958  | 3.26725      | 2.67E-06  | 1         |
| D14Abb1e_j3      | 0.139828  | 0.130355  | -0.101209    | 0.800353  | 0.933449  |
| D14Abb1e_j8      | 0.143162  | 0.217468  | 0.60315      | 0.182686  | 0.523127  |
| Erc2_j6          | 0.0110283 | 1.27364   | 0            | 1         | 1         |
| Erc2_j9          | 0         | 0.179066  | 0            | 1         | 1         |
| Wnt5a_j3         | 0.225878  | 0.271213  | 0            | 1         | 1         |
| Dcp1a_j4         | 0.359292  | 0.495396  | 0            | 1         | 1         |
| Tkt_j7           | 59.4754   | 79.5862   | 0            | 1         | 1         |
| Rft1_j1          | 1.11149   | 1.46943   | 0.402763     | 0.20008   | 0.543279  |
| Capn7_j1         | 1.96535   | 2.1309    | 0            | 1         | 1         |
| Btd_j2           | 4.86813   | 4.70585   | 0            | 1         | 1         |
| Arhgap22_j7      | 0         | 0.463363  | 0            | 1         | 1         |
| Syt15_j2         | 0.120137  | 0.110527  | -0.120282    | 0.889738  | 1         |
| Mmrn2_j1         | 0.422777  | 0.437262  | 0.0486001    | 0.896949  | 0.967171  |
| Grid1_j3         | 0         | 0.154218  | 1.79769e+308 | 0.0142137 | 1         |
| XLOC_009634      | 8.54E-06  | 0.0988809 | 13.4999      | 0.991252  | 1         |
| XLOC_009634      | 0         | 0.807277  | 1.79769e+308 | 0.0123319 | 0.100153  |
| XLOC_009634      | 0.0511551 | 0.0549464 | 0.103147     | 0.935098  | 1         |
| Ear2             | 0.109562  | 0.187485  | 0.775023     | 0.417277  | 0.734352  |
| Psmc6_j1         | 20.0804   | 27.9217   | 0.475598     | 0.0032205 | 0.0364935 |
| Samd4_j3         | 0.0613347 | 0.0685688 | 0.160848     | 0.887114  | 1         |
| Fbxo34_j5        | 8.5866    | 8.37468   | -0.0360522   | 0.766854  | 0.920508  |
| 6720456H20Rik_j3 | 1.03162   | 1.53214   | 0            | 1         | 1         |
| Parp2_j2         | 0.797079  | 0.616321  | -0.371042    | 0.538253  | 0.807862  |
| Pnp_j1           | 0.677515  | 0.615862  | -0.137645    | 0.599113  | 0.841178  |
| Rnase4           | 0.267745  | 0.222793  | 0            | 1         | 1         |
| Arhgef40_j4      | 1.28123   | 1.70023   | 0            | 1         | 1         |
| Gm17002_j1       | 0.334208  | 0.36668   | 0.133778     | 0.816372  | 0.940246  |
| XLOC_009686      | 2.49892   | 3.08433   | 0.303653     | 0.0540727 | 0.271004  |
| Oxa1l_j2         | 0.73231   | 0.699894  | -0.0653186   | 0.696278  | 0.888054  |
| Lrp10_j1         | 27.17     | 27.4049   | 0            | 1         | 1         |
| Pabpn1_j2        | 3.43031   | 3.79      | 0.143859     | 0.347363  | 0.686002  |
| Cmtm5_j1         | 6.2034    | 6.24649   | 0.00998548   | 0.946037  | 0.983895  |

|                  |             |           |              |            |           |
|------------------|-------------|-----------|--------------|------------|-----------|
| Ngdn_j1          | 0           | 0.343904  | 1.79769e+308 | 0.0088438  | 0.0782138 |
| Lrrc16b_j8       | 3.0126      | 3.85884   |              | 0          | 1         |
| Cpne6_j2         | 0.155114    | 0.774501  |              | 2.31994    | 0.0001049 |
| Psme1_j1         | 11.0722     | 12.9583   |              | 0.226931   | 0.162514  |
| Psme1_j2         | 2.82679     | 2.34819   |              | -0.267614  | 0.381923  |
| Rec8_j1          | 0.0532821   | 0.0458143 |              | -0.217854  | 0.875066  |
| Nfatc4_j2        | 0.0884854   | 0.04002   |              | -1.14472   | 0.377655  |
| Nfatc4_j5        | 0.0803401   | 0.116223  |              | 0.532699   | 0.629645  |
| Ift88_j2         | 5.22222     | 5.80852   |              | 0.153507   | 0.489764  |
| Fgf9_j5          | 0           | 0.397385  |              | 0          | 1         |
| Cab39l_j3        | 0.242329    | 0.132355  |              | 0          | 1         |
| XLOC_009743      | 0           | 0.149906  | 1.79769e+308 | 0.050712   | 1         |
| Rnaseh2b_j1      | 0.689036    | 0.773966  |              | 0.167691   | 0.791884  |
| Ctsb_j1          | 2.28237     | 1.76203   |              | 0          | 1         |
| Pinx1_j2         | 0.000342753 | 1.00343   |              | 11.5155    | 0.865913  |
| Zfp395_j4        | 0.000163212 | 0.448708  |              | 11.4248    | 0.697362  |
| Pbk              | 0.284726    | 0.451733  |              | 0.665895   | 0.110201  |
| Ccdc25_j1        | 5.3127      | 4.89078   |              | -0.119382  | 0.230059  |
| Entpd4_j2        | 3.48383     | 4.21932   |              | 0.276336   | 0.0549861 |
| AK133329_j1      | 0.019098    | 0.15194   |              | 2.99201    | 0.191995  |
| Phyhip_j2        | 0.240826    | 0.293675  |              | 0.286228   | 0.598511  |
| Gfra2_j1         | 0           | 0.0603088 |              | 0          | 1         |
| Rcctb2_j2        | 1.14716     | 0.539157  |              | 0          | 1         |
| Zc3h13_j1        | 0.0654683   | 0.0535504 |              | 0          | 1         |
| Tsc22d1_j3       | 0.348401    | 0.422633  |              | 0.278653   | 0.539451  |
| Enox1_j1         | 0.169201    | 0.0725075 |              | 0          | 1         |
| 1300010F03Rik_j1 | 1.30961     | 0.898967  |              | -0.542798  | 0.0569058 |
| Sugt1_j1         | 0.107766    | 0.101636  |              | -0.0845005 | 0.877955  |
| Olfm4_j1         | 0.030252    | 0.243371  |              | 3.00805    | 0.0026837 |
| XLOC_009826      | 0           | 1.52351   | 1.79769e+308 | 0.0147247  | 0.113385  |
| Klf5_j2          | 0           | 0.0818058 | 1.79769e+308 | 0.0731282  | 1         |
| Uchl3_j6         | 0.152733    | 0.8188    |              | 2.4225     | 0.0477384 |
| Lmo7_j7          | 0.0383863   | 0.128261  |              | 1.74042    | 0.0465248 |
| Lmo7_j8          | 0.0948437   | 0.385809  |              | 2.02426    | 0.0001891 |
| Lmo7_j13         | 0.420139    | 3.9087    |              | 3.21775    | 7.02E-10  |
| Scel_j7          | 0           | 0.0662585 | 1.79769e+308 | 0.0896207  | 1         |
| FJ744746_j2      | 0.0222272   | 0.210509  |              | 3.24348    | 0.316148  |
| XLOC_009851      | 0.219599    | 0.0985207 |              | 0          | 1         |
| Dnajc3_j1        | 10.1316     | 9.44744   |              | -0.100863  | 0.346576  |
| AK147121_j3      | 0           | 0.186109  | 1.79769e+308 | 0.0138003  | 0.108424  |
| Hs6st3_j1        | 0.643294    | 0.571089  |              | -0.171763  | 0.544307  |
| Ipo5_j2          | 0.095049    | 0.225687  |              | 1.24758    | 0.0587565 |
| Tm9sf2_j2        | 23.3937     | 21.1512   |              | 0          | 1         |
| Tm9sf2_j4        | 0.0863746   | 0.203997  |              | 0          | 1         |
| Zic2_j1          | 0.243884    | 0.0434001 |              | -2.49043   | 0.0310967 |
| AK136126_j5      | 0.0239561   | 0.100841  |              | 2.07362    | 0.420398  |
| Iitgbl1_j2       | 0           | 0.0660905 | 1.79769e+308 | 0.0190887  | 1         |

|             |             |           |               |           |           |
|-------------|-------------|-----------|---------------|-----------|-----------|
| Itgbl1_j1   | 0.271725    | 0.579769  | 1.09333       | 0.0001624 | 0.0032251 |
| Fhit_j5     | 2.41433     | 2.54345   | 0.0751633     | 0.834313  | 0.946759  |
| Cadps_j5    | 7.05576     | 8.49008   | 0             | 1         | 1         |
| Cadps_j6    | 39.4591     | 31.3324   | 0             | 1         | 1         |
| Thoc7_j5    | 4.60194     | 4.43583   | 0             | 1         | 1         |
| Rpl15_j1    | 11.9942     | 16.6986   | 0.477387      | 3.51E-06  | 0.0001242 |
| Kcnk16_j3   | 0.676567    | 1.80143   | 0             | 1         | 1         |
| Mrps16_j2   | 14.267      | 17.3548   | 0.28266       | 0.15971   | 0.49416   |
| Ttc18_j5    | 0.0744285   | 0.182652  | 1.29517       | 0.308345  | 0.653275  |
| Anxa7_j1    | 70.1809     | 70.0839   | 0             | 1         | 1         |
| Ppp3cb      | 7.77329     | 8.79328   | 0             | 1         | 1         |
| Usp54_j2    | 0.735962    | 0.709474  | 0             | 1         | 1         |
| Usp54_j1    | 0.706634    | 0.673925  | 0             | 1         | 1         |
| Ndst2_j3    | 0           | 0.0695312 | 0             | 1         | 1         |
| Ndst2_j7    | 0.410848    | 0.446676  | 0             | 1         | 1         |
| Camk2g_j3   | 0.801005    | 0.574379  | 0             | 1         | 1         |
| Camk2g_j4   | 11.5992     | 10.8741   | 0             | 1         | 1         |
| Camk2g_j5   | 7.78993     | 7.54899   | 0             | 1         | 1         |
| Ap3m1_j2    | 9.51772     | 9.51877   | 0.000159519   | 0.998824  | 0.99946   |
| Ap3m1_j3    | 0.151346    | 0.165647  | 0.130256      | 0.871255  | 0.959097  |
| Ap3m1_j7    | 0.892152    | 0.384048  | -1.216        | 0.0526251 | 0.266469  |
| Comtd1_j1   | 1.81668     | 2.01786   | 0             | 1         | 1         |
| Zfp503_j2   | 5.45455     | 4.25451   | -0.358466     | 0.0051419 | 0.0517901 |
| Kcnma1_j5   | 0.0224644   | 0.144557  | 0             | 1         | 1         |
| Dlg5_j3     | 3.11332     | 3.87428   | 0             | 1         | 1         |
| Dlg5_j4     | 0           | 0.157284  | 0             | 1         | 1         |
| Zcchc24_j2  | 4.57017     | 4.65497   | 0             | 1         | 1         |
| Zcchc24_j3  | 0.000117369 | 0.512304  | 0             | 1         | 1         |
| Slmap_j6    | 1.00065     | 0.811721  | 0             | 1         | 1         |
| Cacna2d3_j5 | 11.5512     | 15.649    | 0             | 1         | 1         |
| Cacna2d3_j6 | 3.39203     | 5.69799   | 0             | 1         | 1         |
| Itih3_j2    | 0.0812268   | 0.0828217 | 0.0280521     | 0.980035  | 1         |
| Gnl3_j1     | 4.08564     | 5.01887   | 0             | 1         | 1         |
| Phf7_j3     | 0.0729064   | 0.189147  | 1.37539       | 0.158306  | 0.492505  |
| Hacl1_j3    | 0.654839    | 1.2559    | 0             | 1         | 1         |
| Wdfy4_j1    | 0           | 0.0916307 | 1.79769e+308  | 0.0066568 | 1         |
| XLOC_009960 | 0.0419999   | 0.20969   | 2.3198        | 0.121891  | 0.434788  |
| Bmpr1a_j2   | 0           | 0.317301  | 0             | 1         | 1         |
| Gcap14_j5   | 15.2372     | 19.1719   | 0             | 1         | 1         |
| Nrg3_j9     | 0.090022    | 0.221928  | 1.30174       | 0.174856  | 0.513194  |
| Sh2d4b_j5   | 0.0788362   | 0.0984806 | 0             | 1         | 1         |
| Txndc16_j7  | 0.104511    | 0         | -1.79769e+308 | 0.0001884 | 1         |
| Ero1_j3     | 2.91104     | 2.94407   | 0             | 1         | 1         |
| Fermt2_j2   | 19.4293     | 18.3305   | 0             | 1         | 1         |
| Ddhd1_j4    | 0.217651    | 0.199374  | -0.126537     | 0.821583  | 0.942464  |
| XLOC_009988 | 0.0149674   | 0.0896836 | 2.58302       | 0.197225  | 1         |
| Gmfb_j4     | 10.8576     | 16.35     | 0             | 1         | 1         |

|                  |           |           |              |           |          |
|------------------|-----------|-----------|--------------|-----------|----------|
| Atg14_j2         | 0         | 0.147346  | 0            | 1         | 1        |
| 3632451O06Rik_j2 | 0.326166  | 0.582394  | 0            | 1         | 1        |
| Ttc5_j6          | 0.205709  | 0.296718  | 0.528492     | 0.572487  | 0.827134 |
| Tep1_j1          | 5.10841   | 6.1144    | 0.259338     | 0.120676  | 0.43269  |
| Ndrj2_j4         | 0         | 0.723864  | 0            | 1         | 1        |
| Hnrnpc_j1        | 9.93027   | 8.26394   | 0            | 1         | 1        |
| Chd8_j3          | 0         | 0.790136  | 1.79769e+308 | 3.90E-13  | 5.96E-11 |
| Rab2b_j1         | 13.4432   | 13.5677   | 0.013299     | 0.900427  | 0.968327 |
| Prmt5_j4         | 2.54305   | 3.50748   | 0            | 1         | 1        |
| Haus4_j3         | 1.06934   | 1.03619   | -0.0454257   | 0.901879  | 0.968734 |
| Cdh24_j1         | 0         | 0.0520217 | 1.79769e+308 | 0.066804  | 1        |
| Cdh24_j5         | 0.0491822 | 0.130551  | 1.40841      | 0.193767  | 1        |
| Cebpe_j2         | 0         | 0.0909811 | 1.79769e+308 | 0.083743  | 1        |
| Zfhx2_j2         | 3.83429   | 4.3309    | 0            | 1         | 1        |
| Ap1g2_j3         | 0.136148  | 0.0945139 | 0            | 1         | 1        |
| Ipo4_j5          | 0.330911  | 0.271258  | 0            | 1         | 1        |
| Nedd8_j1         | 114.761   | 110.799   | 0            | 1         | 1        |
| Rabggta_j1       | 0.780467  | 0.775441  | -0.00932193  | 0.979717  | 0.994006 |
| Dhrs1_j2         | 0         | 0.49565   | 0            | 1         | 1        |
| Adcy4_j1         | 0.0558273 | 0.0568967 | 0.0273753    | 0.982005  | 1        |
| Zmym5_j6         | 0         | 0.472932  | 0            | 1         | 1        |
| Zmym5_j7         | 1.15736   | 1.18487   | 0            | 1         | 1        |
| Zmym5_j8         | 0         | 0.804885  | 0            | 1         | 1        |
| Xpo4_j2          | 0.238033  | 0.364171  | 0.613457     | 0.26895   | 0.61796  |
| Xpo4_j8          | 0         | 0.065313  | 1.79769e+308 | 0.113046  | 1        |
| Zdhhc20_j3       | 0.823212  | 0.51557   | 0            | 1         | 1        |
| Gm4902_j2        | 0.719192  | 1.20602   | 0.745808     | 0.0267452 | 0.172139 |
| Setdb2_j6        | 0.530609  | 0.326413  | -0.700949    | 0.0635555 | 0.298867 |
| Atp8a2_j7        | 0         | 0.924073  | 0            | 1         | 1        |
| Ints6_j1         | 0.134567  | 0.266701  | 0            | 1         | 1        |
| Ints6_j2         | 0.103988  | 0.0748672 | 0            | 1         | 1        |
| XLOC_010078      | 0.16684   | 0.185522  | 0.153128     | 0.837033  | 0.947826 |
| Mtmr9_j1         | 31.6871   | 34.0432   | 0.103474     | 0.234123  | 0.581507 |
| Msra_j4          | 0.720623  | 0.928827  | 0            | 1         | 1        |
| Extl3_j9         | 10.5175   | 11.4674   | 0            | 1         | 1        |
| Extl3_j8         | 3.24419   | 2.47397   | 0            | 1         | 1        |
| Fzd3_j2          | 4.10E-05  | 0.689876  | 14.0395      | 0.738724  | 0.908177 |
| Esco2_j1         | 0.128141  | 0.167664  | 0.387836     | 0.622358  | 0.852322 |
| Ppp2r2d_j2       | 6.33219   | 8.84171   | 0.48162      | 0.0156354 | 0.118265 |
| Dock5_j3         | 1.79949   | 2.22556   | 0            | 1         | 1        |
| XLOC_010100      | 0.068707  | 0.104407  | 0.603696     | 0.585478  | 1        |
| Nefm_j2          | 241.455   | 178.853   | -0.432982    | 9.01E-07  | 3.79E-05 |
| Slc25a37_j3      | 0.880752  | 1.62151   | 0            | 1         | 1        |
| 2610301G19Rik    | 10.8945   | 10.3586   | -0.0727762   | 0.496098  | 0.783139 |
| Pdlim2_j4        | 0.34104   | 0.460289  | 0.432598     | 0.472163  | 0.769302 |
| Slc39a14_j6      | 0.368477  | 0.176342  | 0            | 1         | 1        |
| Piwil2_j1        | 0.0957197 | 0.0740667 | -0.369992    | 0.702924  | 1        |

|               |             |             |              |           |           |
|---------------|-------------|-------------|--------------|-----------|-----------|
| Fam160b2_j7   | 0.32786     | 0.109728    | 0            | 1         | 1         |
| Epb4.9_j2     | 8.36746     | 9.6456      | 0            | 1         | 1         |
| Npm2_j1       | 0.0950126   | 0.16967     | 0.836537     | 0.270314  | 0.619522  |
| Xpo7_j2       | 6.34501     | 6.97787     | 0            | 1         | 1         |
| Fndc3a_j2     | 0           | 0.14239     | 0            | 1         | 1         |
| Fndc3a_j3     | 0           | 0.269158    | 0            | 1         | 1         |
| Cysltr2_j4    | 0.000804839 | 0.23273     | 8.17574      | 0.248919  | 0.596414  |
| Cog3_j5       | 1.62522     | 2.75407     | 0            | 1         | 1         |
| Gtf2f2_j1     | 0           | 0.789787    | 1.79769e+308 | 0.0007161 | 0.010925  |
| Serp2_j1      | 3.74548     | 4.9548      | 0.403676     | 0.291539  | 0.638573  |
| Serp2_j2      | 5.16269     | 7.36563     | 0.512686     | 0.127796  | 0.445418  |
| Serp2_j3      | 7.68911     | 6.90183     | -0.155837    | 0.526984  | 0.801327  |
| Serp2_j4      | 1.21558     | 1.3853      | 0.188555     | 0.412964  | 0.731915  |
| Akap11_j4     | 17.4923     | 18.9199     | 0            | 1         | 1         |
| Dgkh_j5       | 4.55977     | 5.74406     | 0            | 1         | 1         |
| Naa16_j6      | 0.481439    | 0.651434    | 0.436267     | 0.217705  | 0.563773  |
| Klf12_j8      | 0.169742    | 0.196006    | 0.207553     | 0.835016  | 0.946943  |
| Tbc1d4_j8     | 2.42776     | 1.73079     | 0            | 1         | 1         |
| Mycbp2_j5     | 26.8643     | 26.6671     | -0.0106323   | 0.923398  | 0.97612   |
| Mycbp2_j6     | 0.357721    | 0.279963    | -0.353598    | 0.163519  | 0.498849  |
| Mycbp2_j7     | 0.111234    | 0.0450993   | -1.30243     | 0.0114497 | 1         |
| Rbm26_j5      | 1.36243     | 1.09139     | 0            | 1         | 1         |
| Rbm26         | 1.85702     | 1.75012     | 0            | 1         | 1         |
| Spry2_j1      | 0           | 0.672819    | 1.79769e+308 | 3.33E-05  | 0.0008476 |
| Abcc4_j3      | 1.21994     | 1.43651     | 0            | 1         | 1         |
| Abcc4_j4      | 0.558581    | 0.299788    | 0            | 1         | 1         |
| Dzip1_j6      | 0.119299    | 0.26396     | 0            | 1         | 1         |
| Dzip1_j7      | 0.000256095 | 0.10632     | 0            | 1         | 1         |
| Dzip1_j8      | 0.244404    | 0.0889372   | 0            | 1         | 1         |
| Uggt2_j5      | 0.435955    | 0.307681    | -0.502743    | 0.1801    | 0.519782  |
| Uggt2_j6      | 0.75358     | 0.875748    | 0.216755     | 0.3678    | 0.701102  |
| XLOC_010184   | 0.206632    | 0.129877    | -0.669913    | 0.565133  | 0.823689  |
| Dock9_j4      | 0.800264    | 0.724754    | -0.142984    | 0.751839  | 0.914176  |
| Dock9_j5      | 0.4763      | 0.568331    | 0.254861     | 0.487865  | 0.778453  |
| Dock9_j6      | 1.24774     | 1.21571     | -0.0375201   | 0.840472  | 0.949579  |
| A330035P11Rik | 0.244493    | 0.150052    | 0            | 1         | 1         |
| Nalcn_j7      | 0.146057    | 0.704907    | 2.2709       | 1.42E-09  | 1.16E-07  |
| Sepp1         | 24.2246     | 23.8942     | -0.019812    | 0.825921  | 0.943863  |
| Oxct1         | 47.588      | 48.8817     | 0            | 1         | 1         |
| Plcx3         | 0.000122318 | 1.03153     | 0            | 1         | 1         |
| Rpl37_j2      | 4.64803     | 7.16194     | 0            | 1         | 1         |
| Prkaa1        | 24.1642     | 20.22       | -0.257085    | 0.0047793 | 0.0490603 |
| Ttc33         | 3.24301     | 2.7497      | 0            | 1         | 1         |
| Ttc33         | 7.68576     | 8.26958     | 0            | 1         | 1         |
| Ttc33         | 0.433466    | 0.000267055 | 0            | 1         | 1         |
| Dab2          | 1.35712     | 1.9405      | 0            | 1         | 1         |
| Rictor        | 1.65986     | 1.32566     | -0.324346    | 0.0382956 | 0.217673  |

|                   |           |                 |            |           |           |
|-------------------|-----------|-----------------|------------|-----------|-----------|
| Rictor_j5         | 5.10812   | 5.51636         | 0.110924   | 0.376749  | 0.708706  |
| Lifr              | 15.1991   | 14.4754         | 0          | 1         | 1         |
| Lifr              | 1.80149   | 1.616           | 0          | 1         | 1         |
| XLOC_010943       | 0.171874  | 0.18867         | 0          | 1         | 1         |
| XLOC_010944       | 0.15921   | 0.101079        | -0.655448  | 0.461863  | 0.763021  |
| Nup155            | 2.67241   | 1.64545         | 0          | 1         | 1         |
| 2410089E03Rik_j2  | 0.444992  | 0.367958        | -0.274236  | 0.31281   | 0.657266  |
| 2410089E03Rik_j15 | 0.716412  | 0.737268        | 0.0414014  | 0.892581  | 0.966031  |
| XLOC_010947       | 0.099925  | 0.119522        | 0.258358   | 0.755428  | 1         |
| 1110020G09Rik     | 0.47601   | 0.182964        | -1.37943   | 0.0120281 | 0.0983906 |
| 1110020G09Rik     | 0.172675  | 0.480505        | 1.47649    | 0.0026453 | 0.0311971 |
| 1110020G09Rik_j2  | 1.97538   | 1.43791         | -0.458154  | 0.0358654 | 0.208958  |
| 1110020G09Rik_j3  | 0.0362448 | 0.351839        | 3.27907    | 0.0012821 | 0.017441  |
| Lmbrd2            | 4.68767   | 2.89929         | 0          | 1         | 1         |
| Rad1_j1           | 0.920444  | 0.730808        | -0.332838  | 0.577924  | 0.830091  |
| Rad1              | 6.45675   | 6.17962         | -0.0632904 | 0.688139  | 0.884104  |
| AK047938          | 0.222567  | 0.187189        | -0.249745  | 0.576928  | 0.829228  |
| Amacr             | 7.84185   | 7.44849         | -0.0742468 | 0.577834  | 0.830014  |
| Zfr               | 27.2159   | 26.8827         | 0          | 1         | 1         |
| Zfr_j3            | 0.096135  | 0.0876969       | 0          | 1         | 1         |
| Mtmr12            | 1.69073   | 1.49433         | -0.178149  | 0.270752  | 0.619965  |
| Mtmr12            | 0.4       | 0.422079        | 0.0775129  | 0.799658  | 0.933125  |
| Golph3            | 25.0826   | 24.2663         | 0          | 1         | 1         |
| Drosha            | 13.2439   | 11.9466         | 0          | 1         | 1         |
| Drosha_j5         | 2.28011   | 2.89727         | 0          | 1         | 1         |
| Cdh9_j1           | 0.816405  | 0.625122        | 0          | 1         | 1         |
| Cdh10             | 0.748161  | 0.224009        | -1.73979   | 2.68E-06  | 9.83E-05  |
| Cdh12             | 0.761363  | 0.204061        | -1.89959   | 2.82E-10  | 2.61E-08  |
| Cdh12_j1          | 0.149863  | 0.314733        | 1.07048    | 0.0015433 | 0.0202104 |
| Cdh12_j2          | 0.138657  | 0 -1.79769e+308 |            | 2.26E-08  | 1.46E-06  |
| XLOC_010965       | 0.245437  | 0.0910219       | -1.43107   | 0.0339441 | 0.201735  |
| Cdh18             | 4.43911   | 3.40532         | -0.382479  | 0.002478  | 0.0296324 |
| Cdh18_j3          | 1.15164   | 1.13692         | -0.0185593 | 0.953308  | 0.986435  |
| Myo10             | 2.83949   | 4.18792         | 0          | 1         | 1         |
| Myo10_j1          | 0.126727  | 0.0244932       | 0          | 1         | 1         |
| Myo10_j4          | 0.436289  | 2.21644         | 0          | 1         | 1         |
| Fam134b           | 8.82824   | 9.05618         | 0          | 1         | 1         |
| Fam134b           | 6.20758   | 8.37371         | 0          | 1         | 1         |
| Zfp622            | 7.50051   | 7.97208         | 0.0879675  | 0.46813   | 0.766788  |
| March11           | 0.811563  | 0.579721        | -0.485344  | 0.253531  | 0.601622  |
| March11           | 4.63934   | 3.38573         | -0.454453  | 0.010143  | 0.0864174 |
| XLOC_010972       | 0.164141  | 0.0462677       | -1.82686   | 0.11007   | 0.412846  |
| XLOC_010973       | 0.251732  | 0.153503        | -0.713626  | 0.0656777 | 0.305528  |
| Ank               | 18.1467   | 14.6395         | 0          | 1         | 1         |
| Ank_j1            | 19.8983   | 20.395          | 0          | 1         | 1         |
| XLOC_010975       | 0.115741  | 0.014784        | -2.96879   | 0.2359    | 1         |
| Ctnnd2            | 3.29775   | 2.81582         | 0          | 1         | 1         |



|             |           |                 |            |           |           |
|-------------|-----------|-----------------|------------|-----------|-----------|
| Ctnnd2_j6   | 0.186867  | 0.026454        | 0          | 1         | 1         |
| Dap         | 5.79471   | 7.70681         | 0.411398   | 0.009708  | 0.083861  |
| Cmb1_j2     | 2.24549   | 1.80942         | -0.311504  | 0.409595  | 0.729874  |
| Cmb1        | 7.07336   | 8.57082         | 0.277039   | 0.129511  | 0.448468  |
| Sema5a_j1   | 0.278657  | 0.160862        | -0.792666  | 0.0311401 | 0.190296  |
| Sema5a      | 1.49984   | 1.57748         | 0.072815   | 0.621007  | 0.851431  |
| Sdc2        | 7.17478   | 6.87166         | -0.0622756 | 0.585774  | 0.834076  |
| Pgcp        | 6.19453   | 5.5194          | -0.166483  | 0.283692  | 0.632071  |
| XLOC_010984 | 0.227532  | 0.265241        | 0          | 1         | 1         |
| Mtdh_j4     | 3.28397   | 3.48705         | 0          | 1         | 1         |
| Mtdh_j3     | 0.879539  | 0.973101        | 0          | 1         | 1         |
| Mtdh        | 4.37339   | 4.29917         | 0          | 1         | 1         |
| Laptm4b     | 23.9829   | 20.4918         | 0          | 1         | 1         |
| Laptm4b_j2  | 23.231    | 20.0995         | 0          | 1         | 1         |
| Matn2       | 5.58081   | 5.18785         | 0          | 1         | 1         |
| Matn2_j2    | 14.9308   | 16.6661         | 0          | 1         | 1         |
| Pop1        | 1.42276   | 1.24789         | -0.189208  | 0.244533  | 0.592073  |
| Kcns2       | 0.284653  | 0.189236        | -0.589013  | 0.112791  | 0.418089  |
| Vps13b_j3   | 2.66108   | 2.47454         | -0.104854  | 0.345944  | 0.685212  |
| Spag1_j2    | 1.69485   | 1.64982         | -0.0388445 | 0.888439  | 0.964658  |
| XLOC_010992 | 0.11757   | 0 -1.79769e+308 |            | 0.0211659 | 1         |
| XLOC_010993 | 0.151965  | 0.0777482       | -0.966859  | 0.222354  | 0.569453  |
| XLOC_010993 | 0.101559  | 0.0422814       | -1.26422   | 0.170484  | 1         |
| XLOC_010993 | 0.05582   | 0.00102938      | -5.76093   | 0.692988  | 1         |
| XLOC_010995 | 0.115772  | 0.00753375      | -3.94177   | 0.270351  | 1         |
| XLOC_010997 | 0.0855536 | 0.0389967       | -1.13348   | 0.492318  | 1         |
| XLOC_010998 | 0.0613875 | 0.132526        | 1.11026    | 0.358886  | 1         |
| XLOC_010998 | 0.244434  | 0.181747        | -0.427513  | 0.529372  | 0.802396  |
| Atp6v1c1    | 62.8602   | 57.0757         | -0.13927   | 0.119445  | 0.430027  |
| Baalc_j1    | 0.442523  | 0 -1.79769e+308 |            | 3.11E-07  | 1.47E-05  |
| Fzd6        | 0.969505  | 0.46058         | -1.0738    | 0.0001872 | 0.0036316 |
| Cthrc1      | 4.35493   | 4.24685         | -0.036257  | 0.853402  | 0.953554  |
| Cthrc1_j1   | 1.13988   | 0.506204        | -1.1711    | 0.0616663 | 0.293537  |
| Dcaf13      | 4.44138   | 4.18665         | 0          | 1         | 1         |
| Dcaf13_j2   | 4.35038   | 4.0785          | 0          | 1         | 1         |
| Rims2_j2    | 0.309431  | 0 -1.79769e+308 |            | 2.44E-17  | 6.35E-15  |
| Rims2_j9    | 0.137561  | 0.050364        | -1.44961   | 0.0250389 | 0.164481  |
| Rims2_j15   | 0.158496  | 0.173376        | 0.129459   | 0.794488  | 0.931431  |
| XLOC_011007 | 0.101072  | 0 -1.79769e+308 |            | 0.022508  | 1         |
| Zfpm2       | 0.385142  | 0.489123        | 0.344808   | 0.238457  | 0.585379  |
| Zfpm2_j2    | 0.431778  | 0.183694        | -1.23298   | 0.0029229 | 0.0337515 |
| Oxr1        | 8.72103   | 4.77989         | -0.867523  | 2.58E-12  | 3.45E-10  |
| Oxr1        | 0.361601  | 0.110167        | -1.7147    | 0.0052432 | 0.0525386 |
| Ttc35       | 6.00047   | 5.84053         | -0.0389777 | 0.715433  | 0.897199  |
| Eny2        | 2.31417   | 2.76356         | 0          | 1         | 1         |
| Eny2        | 7.98235   | 7.35476         | 0          | 1         | 1         |
| Ebag9       | 2.77738   | 2.12981         | 0          | 1         | 1         |

|                  |            |                 |            |           |           |
|------------------|------------|-----------------|------------|-----------|-----------|
| Ebag9            | 3.21468    | 3.33547         | 0          | 1         | 1         |
| A930017M01Rik_j2 | 0.372793   | 0.219372        | -0.764997  | 0.0984957 | 0.388034  |
| XLOC_011019      | 0.129233   | 0.111465        | -0.213385  | 0.871385  | 1         |
| Utp23            | 1.59954    | 1.74806         | 0.128099   | 0.483551  | 0.77601   |
| Aard             | 3.1149     | 2.14862         | -0.535774  | 0.0049967 | 0.0507046 |
| Med30            | 11.1058    | 10.3703         | -0.0988535 | 0.565158  | 0.8237    |
| Mal2             | 23.4626    | 16.6049         | -0.49875   | 3.25E-06  | 0.0001167 |
| Mal2_j2          | 1.45214    | 0 -1.79769e+308 |            | 2.30E-17  | 6.03E-15  |
| Nov              | 2.16985    | 3.99006         | 0.878816   | 1.53E-12  | 2.12E-10  |
| Deptor           | 1.70222    | 1.17508         | 0          | 1         | 1         |
| Deptor_j1        | 1.52437    | 0.260018        | 0          | 1         | 1         |
| Deptor_j2        | 4.41239    | 3.42848         | 0          | 1         | 1         |
| Col14a1_j3       | 0.427271   | 5.22E-05        | -12.9999   | 0.842461  | 0.95025   |
| Col14a1_j1       | 0.418374   | 0.164016        | -1.35095   | 0.001491  | 0.0196476 |
| Zhx2             | 1.2148     | 1.04462         | 0          | 1         | 1         |
| Zhx2_j2          | 1.39471    | 0.292186        | 0          | 1         | 1         |
| Wdr67            | 0.399256   | 0.109982        | -1.86005   | 0.0050796 | 0.0513219 |
| Wdr67_j7         | 0.134929   | 0 -1.79769e+308 |            | 0.0013935 | 1         |
| Wdr67_j13        | 0.406933   | 0.324679        | -0.325778  | 0.482179  | 0.775494  |
| Wdr67_j15        | 0.485691   | 0.373859        | -0.377544  | 0.548281  | 0.814119  |
| Wdyhv1           | 7.7049     | 8.66556         | 0.169516   | 0.274091  | 0.623288  |
| Wdyhv1_j1        | 5.31325    | 5.42543         | 0.0301423  | 0.894809  | 0.966832  |
| D15Erttd621e     | 9.8042     | 9.02722         | 0          | 1         | 1         |
| Trmt12           | 1.82974    | 1.96642         | 0.103928   | 0.500094  | 0.784967  |
| Ndufb9           | 137.939    | 132.15          | -0.0618468 | 0.496822  | 0.783599  |
| Sqle             | 94.756     | 107.497         | 0          | 1         | 1         |
| Nsmce2_j1        | 1.21997    | 0.873006        | 0          | 1         | 1         |
| Nsmce2           | 4.66288    | 4.44159         | 0          | 1         | 1         |
| Trib1            | 2.27975    | 2.16449         | -0.0748483 | 0.671191  | 0.875675  |
| Myc              | 0.216092   | 0.206891        | -0.0627784 | 0.911626  | 0.972265  |
| Myc              | 0.53074    | 0.643431        | 0.277778   | 0.369823  | 0.70328   |
| Pvt1_j12         | 1.2353     | 0.849723        | -0.539794  | 0.190065  | 0.531884  |
| Efr3a            | 6.52327    | 4.46843         | 0          | 1         | 1         |
| Phf20l1          | 1.08159    | 0.929453        | 0          | 1         | 1         |
| Phf20l1_j2       | 0.00012901 | 0.173434        | 0          | 1         | 1         |
| Phf20l1_j6       | 0.061131   | 0.117142        | 0          | 1         | 1         |
| Khdrbs3          | 2.24906    | 2.00538         | 0          | 1         | 1         |
| Gm3150           | 16.2352    | 18.4193         | 0          | 1         | 1         |
| XLOC_011060      | 0.14753    | 0.00195796      | -6.23551   | 0.682594  | 0.880953  |
| mKIAA0870_j1     | 0.0644657  | 0.0705047       | 0.129186   | 0.900602  | 1         |
| mKIAA0870_j2     | 0.0486315  | 0 -1.79769e+308 |            | 0.0175809 | 1         |
| Ptp4a3           | 14.2615    | 15.7915         | 0.147024   | 0.268674  | 0.617595  |
| Ptp4a3           | 6.39253    | 4.72611         | -0.435732  | 0.0421951 | 0.232106  |
| Bai1_j1          | 1.71513    | 1.54974         | -0.146293  | 0.44159   | 0.750262  |
| 4930572J05Rik    | 69.5724    | 70.2357         | 0          | 1         | 1         |
| 4930572J05Rik_j1 | 54.4087    | 60.2057         | 0          | 1         | 1         |
| Ly6e             | 3.43664    | 5.69937         | 0          | 1         | 1         |

|               |           |                 |             |           |           |
|---------------|-----------|-----------------|-------------|-----------|-----------|
| Ly6e          | 7.29064   | 10.9198         | 0           | 1         | 1         |
| Ly6e_j5       | 5.77083   | 9.42218         | 0           | 1         | 1         |
| Gpihbp1_j1    | 1.20247   | 0.900766        | -0.416777   | 0.233214  | 0.580492  |
| Gpihbp1       | 0.166026  | 0.119953        | -0.468947   | 0.49787   | 0.783786  |
| Zfp41         | 0.197899  | 0.120703        | -0.713301   | 0.0889588 | 0.365503  |
| Zfp41         | 0.130492  | 0.141216        | 0.113951    | 0.788504  | 1         |
| AK084954      | 0.176992  | 0.242746        | 0.455764    | 0.524794  | 0.800322  |
| Rhpn1_j1      | 0.195245  | 0.303808        | 0.637876    | 0.255513  | 0.604208  |
| Rhpn1         | 1.15967   | 0.885084        | -0.389834   | 0.125763  | 0.441571  |
| Rhpn1_j8      | 1.31338   | 1.52579         | 0.21627     | 0.566334  | 0.824486  |
| XLOC_011075   | 0.0854183 | 0.0743367       | -0.20047    | 0.864067  | 1         |
| Gsdmd         | 0.222748  | 0.42694         | 0.938618    | 0.101544  | 0.39484   |
| Gsdmd_j6      | 0.162246  | 0.0292263       | -2.47284    | 0.149143  | 0.478226  |
| Zfp623        | 0.817591  | 0.764131        | -0.0975605  | 0.762364  | 0.918113  |
| Zfp623_j2     | 0.49618   | 0 -1.79769e+308 |             | 2.05E-09  | 1.64E-07  |
| Zfp707        | 2.44078   | 2.35955         | -0.0488342  | 0.798375  | 0.933105  |
| Grina_j1      | 0.319504  | 0.267532        | -0.256121   | 0.38789   | 0.715434  |
| Gpaa1_j1      | 7.87372   | 7.6262          | 0           | 1         | 1         |
| Cyc1          | 12.0948   | 11.6376         | 0           | 1         | 1         |
| Maf1          | 2.32269   | 2.37269         | 0           | 1         | 1         |
| XLOC_011089   | 0.0806578 | 0.0949178       | 0.234864    | 0.794718  | 1         |
| Brp16_j3      | 1.61074   | 1.50472         | -0.0982324  | 0.71125   | 0.89506   |
| Brp16         | 0.72856   | 0.770473        | 0.0806963   | 0.813384  | 0.939062  |
| Brp16_j4      | 0.258219  | 0.410333        | 0.6682      | 0.299015  | 0.645893  |
| Heatr7a_j3    | 10.1964   | 11.5286         | 0           | 1         | 1         |
| Hsf1          | 0.386604  | 0.369026        | -0.0671353  | 0.766477  | 0.920335  |
| Gpr172b       | 2.75032   | 2.88627         | 0.0696088   | 0.589091  | 0.836005  |
| Adck5         | 0.741488  | 0.680454        | 0           | 1         | 1         |
| Ppp1r16a_j1   | 0.315906  | 0.233635        | -0.435238   | 0.312849  | 0.657266  |
| Zfp7          | 2.18888   | 2.18841         | 0           | 1         | 1         |
| Commd5        | 0.796286  | 0.861304        | 0           | 1         | 1         |
| Rpl8          | 38.8541   | 58.656          | 0           | 1         | 1         |
| 1110038F14Rik | 0.15619   | 0.207442        | 0.409403    | 0.669787  | 0.875085  |
| 1110038F14Rik | 7.64709   | 7.60674         | -0.00763223 | 0.963126  | 0.989734  |
| XLOC_011105   | 0.077485  | 0.0179716       | -2.1082     | 0.447024  | 1         |
| XLOC_011105   | 0.139103  | 0.0663296       | -1.06842    | 0.280133  | 0.628973  |
| Apol9b_j1     | 0.134096  | 0.0948965       | -0.498835   | 0.616561  | 1         |
| XLOC_011108   | 0.302161  | 0.169588        | -0.833281   | 0.0148968 | 0.114388  |
| Ncf4_j2       | 0.132676  | 0.0590147       | -1.16876    | 0.475768  | 1         |
| Mpst          | 0.942257  | 0.447954        | -1.07277    | 0.0605598 | 0.290153  |
| Mpst          | 7.50798   | 8.38881         | 0.160041    | 0.308073  | 0.653037  |
| Mpst_j1       | 0.216815  | 0.246206        | 0.183404    | 0.845644  | 0.951227  |
| Kctd17_j2     | 22.9904   | 22.4529         | 0           | 1         | 1         |
| Kctd17_j1     | 21.2379   | 18.2799         | 0           | 1         | 1         |
| XLOC_011113   | 0.157637  | 0.0449617       | -1.80984    | 0.18065   | 0.520451  |
| Cyth4         | 1.04178   | 2.16512         | 1.05539     | 8.50E-07  | 3.59E-05  |
| Cyth4_j2      | 0.420915  | 1.11334         | 1.40329     | 4.12E-05  | 0.0010102 |

|             |           |                 |             |           |           |
|-------------|-----------|-----------------|-------------|-----------|-----------|
| Cdc42ep1    | 4.50007   | 4.75899         | 0.0807076   | 0.580692  | 0.831731  |
| Sh3bp1_j2   | 0.387303  | 0.384333        | -0.0111046  | 0.980219  | 0.994006  |
| Pdpx        | 4.82132   | 4.32052         | -0.158224   | 0.368383  | 0.701715  |
| Lgals1      | 31.5359   | 57.1747         | 0.85838     | 0         | 0         |
| Lgals1_j2   | 0.534512  | 0 -1.79769e+308 |             | 0.0069418 | 0.0654286 |
| Nol12       | 11.4341   | 15.6717         | 0.454824    | 0.0018914 | 0.0238941 |
| Nol12_j2    | 1.33287   | 1.83103         | 0.458125    | 0.179424  | 0.519116  |
| Nol12_j1    | 3.15278   | 3.01583         | -0.0640699  | 0.806303  | 0.93593   |
| Triobp_j1   | 0.196383  | 0.0866405       | -1.18056    | 0.0229386 | 0.154827  |
| Triobp      | 1.49349   | 1.3756          | -0.118633   | 0.624585  | 0.853434  |
| H1f0        | 26.7034   | 26.7086         | 0.000277682 | 0.997621  | 0.999228  |
| Gcat        | 4.69073   | 4.75298         | 0.0190222   | 0.905893  | 0.970135  |
| Eif3l_j1    | 22.6546   | 22.3334         | -0.0206031  | 0.844974  | 0.950962  |
| Eif3l_j2    | 0.877762  | 2.0796          | 1.24441     | 3.49E-05  | 0.0008783 |
| Micall1     | 3.59939   | 4.0292          | 0           | 1         | 1         |
| Polr2f      | 9.55172   | 11.5277         | 0           | 1         | 1         |
| Gm10863_j1  | 0.269921  | 0.181492        | -0.572627   | 0.163766  | 0.499258  |
| Pick1_j2    | 0.398541  | 0.511281        | 0.35939     | 0.558757  | 0.82019   |
| Pick1       | 14.101    | 13.7516         | -0.0361914  | 0.753971  | 0.915071  |
| Cby1        | 0.603549  | 0.49885         | -0.274864   | 0.404732  | 0.726779  |
| Tomm22      | 0.299354  | 0 -1.79769e+308 |             | 4.05E-05  | 0.0009956 |
| Tomm22_j2   | 8.05546   | 6.79083         | -0.246378   | 0.0991244 | 0.389598  |
| Gtpbp1_j1   | 0.529204  | 0.850569        | 0.684604    | 0.0393037 | 0.221389  |
| Gtpbp1      | 5.00885   | 4.67381         | -0.099881   | 0.448306  | 0.754855  |
| XLOC_011139 | 0.203505  | 0 -1.79769e+308 |             | 0.0006064 | 0.0095716 |
| Syng1       | 8.47333   | 6.4166          | 0           | 1         | 1         |
| Tab1        | 5.39498   | 4.96225         | -0.120623   | 0.377683  | 0.709365  |
| Mgat3       | 4.04047   | 2.71426         | 0           | 1         | 1         |
| Mgat3_j2    | 20.6346   | 27.712          | 0           | 1         | 1         |
| Atf4        | 85.5355   | 105.978         | 0           | 1         | 1         |
| Cacna1i_j3  | 0.147219  | 0.117761        | -0.3221     | 0.512625  | 0.792284  |
| Cacna1i_j11 | 0.502294  | 0.106528        | -2.2373     | 0.0154313 | 0.117303  |
| Fam83f      | 0.0432907 | 0.0679955       | 0.651383    | 0.474551  | 1         |
| Fam83f_j4   | 0.0709208 | 0 -1.79769e+308 |             | 0.0020401 | 1         |
| XLOC_011148 | 0.0916831 | 0.104328        | 0.186403    | 0.818125  | 1         |
| Tnrc6b      | 6.07E-05  | 0.04919         | 9.6627      | 0.82303   | 1         |
| Tnrc6b_j5   | 0.248838  | 0.260964        | 0.0686445   | 0.838067  | 0.948335  |
| Adsl        | 14.9382   | 15.4452         | 0.0481517   | 0.664471  | 0.872968  |
| Sgsm3       | 9.91662   | 9.33237         | -0.0876047  | 0.400487  | 0.723924  |
| Mchr1       | 1.72346   | 3.15421         | 0.871973    | 3.97E-06  | 0.0001385 |
| Rbx1_j1     | 3.75383   | 4.89202         | 0           | 1         | 1         |
| Rbx1_j2     | 2.3198    | 2.97503         | 0           | 1         | 1         |
| Rbx1_j4     | 4.89014   | 5.76976         | 0           | 1         | 1         |
| Rbx1_j5     | 0.665131  | 0               | 0           | 1         | 1         |
| XLOC_011155 | 0.25121   | 0.00836737      | -4.90797    | 0.477305  | 0.772673  |
| Ep300       | 1.30853   | 1.16977         | 0           | 1         | 1         |
| L3mbtl2     | 2.42355   | 2.60608         | 0.104761    | 0.366289  | 0.700066  |

|               |           |           |               |           |           |
|---------------|-----------|-----------|---------------|-----------|-----------|
| Zc3h7b_j1     | 7.63297   | 1.96247   | 0             | 1         | 1         |
| Tef           | 9.22358   | 6.42343   | -0.521984     | 1.76E-05  | 0.0004999 |
| Tef_j2        | 0.631685  | 0         | -1.79769e+308 | 9.44E-14  | 1.56E-11  |
| Aco2          | 46.9955   | 40.1443   | -0.227326     | 0.0104721 | 0.0884394 |
| Xrcc6         | 5.92836   | 6.56939   | 0             | 1         | 1         |
| Mei1_j2       | 1.03756   | 0.90379   | -0.19913      | 0.578995  | 0.830622  |
| Ccdc134       | 0.580368  | 0.840913  | 0             | 1         | 1         |
| Ccdc134_j3    | 0.523967  | 0.472023  | 0             | 1         | 1         |
| Srebf2        | 11.7301   | 11.6107   | 0             | 1         | 1         |
| Srebf2        | 28.2662   | 26.1501   | 0             | 1         | 1         |
| Srebf2_j1     | 0.777562  | 0.517155  | 0             | 1         | 1         |
| Sept3         | 17.6713   | 15.6024   | -0.179645     | 0.0583223 | 0.28357   |
| Sept3_j3      | 1.35877   | 0.407029  | -1.7391       | 7.12E-06  | 0.0002308 |
| 1500032L24Rik | 11.8139   | 12.5169   | 0.0833925     | 0.373728  | 0.706553  |
| AK080278_j1   | 0.26811   | 0.309561  | 0             | 1         | 1         |
| Bik           | 0.495073  | 0.588479  | 0.24935       | 0.530188  | 0.802944  |
| Tspo          | 9.74091   | 13.4992   | 0             | 1         | 1         |
| Mpped1        | 1.1209    | 0.739665  | -0.599715     | 0.0342223 | 0.2027    |
| Mpped1_j3     | 0.192867  | 0         | -1.79769e+308 | 0.0001498 | 0.0030124 |
| Pnpla3_j2     | 0.149262  | 0         | -1.79769e+308 | 3.09E-05  | 0.000793  |
| Samm50_j1     | 1.10719   | 0.872973  | -0.342892     | 0.288931  | 0.636698  |
| Samm50_j3     | 4.35566   | 4.37829   | 0.00747591    | 0.969667  | 0.99148   |
| Parvb_j1      | 0.094769  | 0.0925798 | 0             | 1         | 1         |
| Parvb         | 14.2338   | 11.3665   | 0             | 1         | 1         |
| Parvg_j1      | 0.119582  | 0.037589  | -1.66962      | 0.200744  | 1         |
| Prr5_j1       | 0.642528  | 0         | -1.79769e+308 | 4.51E-16  | 1.03E-13  |
| Prr5          | 1.00567   | 0.619243  | -0.699576     | 0.0096103 | 0.0832087 |
| Prr5_j3       | 0.654252  | 0.668303  | 0.030656      | 0.920903  | 0.97524   |
| Nup50         | 1.02256   | 0.96285   | -0.0868025    | 0.566353  | 0.824486  |
| Fam118a       | 4.57889   | 4.97716   | 0.120326      | 0.40828   | 0.728619  |
| Fbln1_j1      | 0.0794962 | 0         | -1.79769e+308 | 0.0147271 | 1         |
| Fbln1         | 0.169067  | 0.235791  | 0.479918      | 0.358815  | 0.694085  |
| Fbln1_j2      | 0.173357  | 0.124033  | -0.483023     | 0.528242  | 0.801996  |
| Atxn10        | 11.3617   | 10.9026   | 0             | 1         | 1         |
| XLOC_011188   | 0.139633  | 0.0812101 | 0             | 1         | 1         |
| Ppara_j2      | 0.0862995 | 0.0140282 | -2.62103      | 0.261704  | 1         |
| Ttc38_j2      | 3.94067   | 3.78986   | -0.0562958    | 0.721356  | 0.900355  |
| Gtse1_j5      | 0.0952244 | 0.0437698 | -1.12139      | 0.492554  | 1         |
| Trmu_j1       | 1.49764   | 1.58633   | 0.0830025     | 0.751427  | 0.913952  |
| Trmu_j2       | 0.174118  | 0.178836  | 0.0385732     | 0.954526  | 0.986881  |
| Gramd4_j2     | 1.40113   | 1.22227   | 0             | 1         | 1         |
| Gramd4_j4     | 0.0605169 | 0         | 0             | 1         | 1         |
| Tbc1d22a_j1   | 10.2051   | 10.7936   | 0.080884      | 0.490467  | 0.780025  |
| Tbc1d22a      | 2.55836   | 2.55773   | -0.000355595  | 0.998255  | 0.999237  |
| Fam19a5       | 5.62189   | 6.88722   | 0             | 1         | 1         |
| Fam19a5       | 11.2796   | 9.90727   | 0             | 1         | 1         |
| Fam19a5_j1    | 3.35945   | 5.15469   | 0             | 1         | 1         |

|                  |           |                 |           |           |           |
|------------------|-----------|-----------------|-----------|-----------|-----------|
| Zbed4_j1         | 1.45112   | 1.81382         | 0.321866  | 0.0391488 | 0.22072   |
| CrelD2           | 4.7699    | 5.5269          | 0.212512  | 0.178645  | 0.518168  |
| Pim3             | 6.25893   | 6.90815         | 0.142384  | 0.248118  | 0.595431  |
| Pim3_j1          | 0.453905  | 0 -1.79769e+308 |           | 5.37E-05  | 0.0012688 |
| Panx2            | 23.5994   | 17.6697         | 0         | 1         | 1         |
| Trabd_j1         | 0.512436  | 0.662855        | 0.371322  | 0.334277  | 0.675107  |
| XLOC_011206      | 0.0688995 | 0.0436121       | -0.659765 | 0.646397  | 1         |
| 1300018J18Rik_j1 | 2.70753   | 2.11025         | 0         | 1         | 1         |
| 1300018J18Rik    | 4.7471    | 4.89341         | 0         | 1         | 1         |
| Adm2             | 0.316763  | 1.21782         | 1.94282   | 2.94E-07  | 1.40E-05  |
| Ncaph2_j7        | 6.92801   | 5.63318         | 0         | 1         | 1         |
| Mapk8ip2_j3      | 16.735    | 14.13           | 0         | 1         | 1         |
| Mapk8ip2_j5      | 0.536875  | 0.472916        | 0         | 1         | 1         |
| AK082325_j1      | 0.500385  | 0.412636        | -0.278167 | 0.386467  | 0.714571  |
| Shank3_j8        | 0.870118  | 0.685317        | -0.344439 | 0.176503  | 0.515252  |
| Shank3_j7        | 0.183314  | 0.0259598       | -2.81997  | 0.0076414 | 0.0703353 |
| Acr_j2           | 0.146431  | 0.168632        | 0.203652  | 0.654177  | 0.86772   |
| Alg10b           | 1.23622   | 1.8993          | 0         | 1         | 1         |
| Alg10b           | 4.9969    | 4.23208         | 0         | 1         | 1         |
| Lrrk2            | 4.21382   | 3.25814         | -0.37108  | 0.0013931 | 0.0186499 |
| Cntn1_j2         | 0.732769  | 0.341603        | 0         | 1         | 1         |
| AK035742_j2      | 0.480345  | 0.636355        | 0.405761  | 0.288361  | 0.636119  |
| AK035742_j3      | 0.096769  | 0 -1.79769e+308 |           | 0.0246669 | 1         |
| XLOC_011224      | 0.402825  | 0.338751        | -0.249928 | 0.772375  | 0.922771  |
| XLOC_011225      | 0.20355   | 0.0789266       | -1.3668   | 0.101828  | 0.395315  |
| Pphln1           | 1.86861   | 2.24163         | 0         | 1         | 1         |
| Pphln1_j6        | 0.638129  | 0.217429        | 0         | 1         | 1         |
| Irak4_j2         | 0.292518  | 0.34932         | 0.256021  | 0.446457  | 0.753343  |
| Tmem117          | 11.5969   | 8.75825         | 0         | 1         | 1         |
| Ano6             | 1.64032   | 2.03144         | 0         | 1         | 1         |
| Gm4371_j1        | 0.114775  | 0.0286613       | -2.00163  | 0.238207  | 1         |
| Gm4371           | 0.0370265 | 0.369296        | 3.31815   | 0.0056274 | 0.0555773 |
| Gm4371_j5        | 0.0606561 | 0.0326516       | -0.893501 | 0.654853  | 1         |
| Arid2            | 2.69993   | 2.93688         | 0.121359  | 0.300864  | 0.647316  |
| Slc48a1          | 13.3487   | 13.4142         | 0         | 1         | 1         |
| Tmem106c         | 10.3085   | 9.46608         | -0.122994 | 0.452667  | 0.757721  |
| Tmem106c_j3      | 0.63263   | 0.449527        | -0.492954 | 0.367668  | 0.701079  |
| Pfkm             | 72.1399   | 54.9585         | 0         | 1         | 1         |
| Cacnb3           | 61.2188   | 73.1896         | 0         | 1         | 1         |
| Prph_j3          | 0.70904   | 0.468663        | 0         | 1         | 1         |
| Prph_j4          | 0.249441  | 1.43071         | 0         | 1         | 1         |
| Prph_j6          | 41.9288   | 47.2804         | 0         | 1         | 1         |
| Troap_j1         | 0.128015  | 0.0659798       | -0.956222 | 0.484171  | 1         |
| Troap_j2         | 0.0825188 | 0.0223524       | -1.88429  | 0.450096  | 1         |
| Dnajc22_j4       | 0.138891  | 0.0947482       | -0.551787 | 0.538763  | 0.808163  |
| Dnajc22_j7       | 0.171712  | 0.0800765       | -1.10054  | 0.284742  | 0.633445  |
| Dnajc22          | 0.201828  | 0.0974776       | -1.04998  | 0.287427  | 0.635587  |

|               |           |           |               |           |           |
|---------------|-----------|-----------|---------------|-----------|-----------|
| Spats2_j4     | 0.356999  | 0.49432   | 0             | 1         | 1         |
| Spats2        | 3.38377   | 3.96658   | 0             | 1         | 1         |
| Prpf40b_j8    | 1.49416   | 1.27596   | -0.227755     | 0.333784  | 0.674658  |
| Prpf40b_j7    | 1.28081   | 1.45521   | 0.184173      | 0.487058  | 0.778108  |
| Tmbim6        | 0.270359  | 0.260225  | 0             | 1         | 1         |
| XLOC_011260   | 0.138247  | 0.0372144 | -1.89332      | 0.0432582 | 0.235998  |
| XLOC_011260   | 0.0912251 | 0.0682721 | -0.418134     | 0.616851  | 1         |
| Smarcd1_j4    | 16.9897   | 13.596    | -0.321483     | 0.0003483 | 0.0060289 |
| Gpd1          | 7.58564   | 6.32481   | 0             | 1         | 1         |
| 2310016M24Rik | 44.8775   | 45.0716   | 0.00622616    | 0.957063  | 0.987657  |
| Larp4_j2      | 0.784043  | 0.454885  | -0.785433     | 0.0105597 | 0.0889942 |
| Dip2b_j2      | 0.62142   | 0.136002  | 0             | 1         | 1         |
| Dip2b_j1      | 1.63278   | 0.833341  | 0             | 1         | 1         |
| Atf1_j5       | 0.561438  | 0.648708  | 0.208444      | 0.6596    | 0.870764  |
| Mettl7a1      | 7.56765   | 7.99829   | 0             | 1         | 1         |
| Gm10035       | 14.5897   | 29.055    | 0             | 1         | 1         |
| Letmd1        | 11.7126   | 12.6945   | 0.116145      | 0.43972   | 0.749296  |
| Letmd1        | 8.5383    | 10.5945   | 0.311291      | 0.0014743 | 0.0194685 |
| Dazap2_j2     | 2.30748   | 0.33921   | 0             | 1         | 1         |
| Slc4a8        | 1.25483   | 1.70341   | 0             | 1         | 1         |
| Scn8a_j2      | 9.79742   | 4.58218   | 0             | 1         | 1         |
| XLOC_011277   | 0.611511  | 0.188125  | -1.70069      | 0.0207357 | 0.144471  |
| Ankrd33_j1    | 0.196939  | 0.101876  | -0.950935     | 0.233314  | 0.580621  |
| Acvrl1        | 1.0065    | 0.436557  | 0             | 1         | 1         |
| Acvrl1_j1     | 0.480684  | 1.03615   | 0             | 1         | 1         |
| Acvrl1_j2     | 0.596335  | 0.492247  | 0             | 1         | 1         |
| Acvr1b        | 10.0872   | 8.87113   | -0.185331     | 0.0723666 | 0.323756  |
| Grasp         | 0.581157  | 0.552967  | -0.0717361    | 0.78423   | 0.927408  |
| Grasp_j2      | 0.058325  | 0.0914997 | 0.649653      | 0.572113  | 1         |
| Nr4a1         | 4.68345   | 4.64565   | 0             | 1         | 1         |
| 9430023L20Rik | 17.5705   | 18.6885   | 0.0889952     | 0.457601  | 0.760491  |
| 6030408B16Rik | 0.540523  | 0.636646  | 0.236137      | 0.528581  | 0.802131  |
| Eif4b         | 24.783    | 23.7584   | 0             | 1         | 1         |
| Tenc1_j2      | 0.117616  | 0.0932171 | 0             | 1         | 1         |
| Tenc1         | 0.277829  | 0.232593  | 0             | 1         | 1         |
| Tenc1_j4      | 0.315863  | 0.160444  | 0             | 1         | 1         |
| Igfbp6        | 3.74011   | 5.72312   | 0             | 1         | 1         |
| Mfsd5         | 4.08472   | 3.71411   | -0.137219     | 0.483824  | 0.776148  |
| Espl1_j1      | 0.057048  | 0.0232979 | -1.29198      | 0.297482  | 1         |
| Espl1_j7      | 0.0608296 | 0         | -1.79769e+308 | 0.0483401 | 1         |
| Myg1_j2       | 12.5971   | 12.469    | -0.0147465    | 0.897358  | 0.967349  |
| Sp1           | 2.7164    | 1.66356   | 0             | 1         | 1         |
| Amhr2_j5      | 1.16867   | 0.72001   | -0.698774     | 0.0981285 | 0.387205  |
| Prr13         | 43.8711   | 68.9521   | 0             | 1         | 1         |
| Prr13         | 22.8816   | 33.3733   | 0             | 1         | 1         |
| Prr13_j3      | 110.879   | 133.426   | 0             | 1         | 1         |
| XLOC_011296   | 0.236824  | 0.260988  | 0.140166      | 0.723109  | 0.901433  |

|               |           |                 |             |           |           |
|---------------|-----------|-----------------|-------------|-----------|-----------|
| Pcbp2_j3      | 61.6854   | 61.1389         | -0.0128384  | 0.891086  | 0.965576  |
| Pcbp2_j2      | 56.408    | 56.4398         | 0.000813383 | 0.993269  | 0.997985  |
| Pcbp2         | 5.45666   | 4.60268         | -0.245542   | 0.0618743 | 0.29424   |
| Tarbp2_j4     | 0.79448   | 1.10875         | 0.480845    | 0.166912  | 0.503257  |
| Tarbp2_j5     | 0.941802  | 0.96384         | 0.0333701   | 0.922025  | 0.975601  |
| Hoxc11_j1     | 0.18669   | 0.0925609       | -1.01217    | 0.346984  | 0.68578   |
| Hoxc11        | 0.615517  | 0.609947        | -0.0131146  | 0.969136  | 0.991369  |
| Hoxc10        | 6.11883   | 5.85377         | -0.063889   | 0.646783  | 0.863885  |
| Hoxc9_j1      | 0.369091  | 0.203296        | 0           | 1         | 1         |
| Hoxc9         | 0.293258  | 0.526107        | 0           | 1         | 1         |
| XLOC_011304   | 0.0662915 | 0.0259357       | 0           | 1         | 1         |
| Hoxc8         | 2.05126   | 1.48747         | 0           | 1         | 1         |
| Hoxc6         | 2.13059   | 2.54188         | 0           | 1         | 1         |
| Hnrnpa1_j3    | 0.0260713 | 0.0619558       | 1.24878     | 0.412326  | 1         |
| Copz1         | 45.7116   | 49.5769         | 0.117106    | 0.202685  | 0.546378  |
| Ghr_j2        | 3.09126   | 2.48904         | 0           | 1         | 1         |
| Ghr           | 6.13547   | 4.46873         | 0           | 1         | 1         |
| AW549877_j1   | 7.90832   | 9.41673         | 0           | 1         | 1         |
| AW549877_j3   | 0.509889  | 2.2475          | 0           | 1         | 1         |
| Card6_j2      | 0.524892  | 0.329859        | 0           | 1         | 1         |
| Card6_j5      | 3.45108   | 2.33593         | 0           | 1         | 1         |
| Ptger4        | 1.21421   | 0.868282        | 0           | 1         | 1         |
| Ptger4        | 1.34249   | 1.34283         | 0           | 1         | 1         |
| Osmr          | 0.649828  | 0.721415        | 0           | 1         | 1         |
| Egflam_j1     | 1.04775   | 0.81084         | 0           | 1         | 1         |
| Egflam        | 1.28786   | 1.32063         | 0           | 1         | 1         |
| Wdr70_j4      | 0.275993  | 0.297767        | 0           | 1         | 1         |
| Nipbl         | 0.416084  | 0.335537        | -0.310406   | 0.227301  | 0.57446   |
| Slc1a3        | 2.07536   | 2.10939         | 0.0234667   | 0.893492  | 0.966325  |
| Dnajc21_j1    | 0.351358  | 0.0813088       | 0           | 1         | 1         |
| Brix1         | 6.32213   | 6.62761         | 0.0680777   | 0.585709  | 0.834044  |
| Rai14         | 1.53834   | 1.19723         | 0           | 1         | 1         |
| Rai14_j3      | 0.124764  | 0               | 0           | 1         | 1         |
| Tars          | 12.705    | 13.9182         | 0.131575    | 0.207876  | 0.552228  |
| Npr3          | 0.0220134 | 0.055085        | 1.32328     | 0.429906  | 1         |
| Sub1          | 26.6836   | 24.8614         | -0.102045   | 0.266973  | 0.61606   |
| Pdzd2_j7      | 0.161193  | 0.0395543       | 0           | 1         | 1         |
| Pdzd2_j1      | 1.27754   | 0.951382        | 0           | 1         | 1         |
| 6030458C11Rik | 7.16221   | 6.0356          | 0           | 1         | 1         |
| Cdh6          | 1.5889    | 0.820704        | 0           | 1         | 1         |
| Acot10        | 15.771    | 15.4751         | -0.0273182  | 0.826273  | 0.943999  |
| Basp1         | 111.19    | 154.511         | 0.474685    | 3.05E-08  | 1.91E-06  |
| Fbxl7         | 0.764286  | 0.708811        | -0.108711   | 0.651165  | 0.866096  |
| XLOC_011346   | 0.207327  | 0.108752        | -0.930867   | 0.108955  | 0.410718  |
| Fam105b_j3    | 6.48952   | 6.79778         | 0.0669536   | 0.694655  | 0.887401  |
| Fam105b       | 0.434243  | 0 -1.79769e+308 |             | 1.06E-05  | 0.0003241 |
| Fam105a       | 2.94935   | 3.71672         | 0.333632    | 0.0639501 | 0.30009   |



|             |           |                 |            |           |           |
|-------------|-----------|-----------------|------------|-----------|-----------|
| Trio_j2     | 4.56521   | 3.94616         | 0          | 1         | 1         |
| Trio_j9     | 0.138094  | 0               | 0          | 1         | 1         |
| Trio_j10    | 0.397707  | 0.241069        | 0          | 1         | 1         |
| Trio_j14    | 10.115    | 8.01897         | 0          | 1         | 1         |
| Ankrd33b    | 0.726773  | 0.392039        | 0          | 1         | 1         |
| Ankrd33b    | 0.130317  | 0.384972        | 0          | 1         | 1         |
| Ropn1l      | 0.604078  | 0.526891        | -0.197229  | 0.685772  | 0.882833  |
| March6      | 18.9409   | 14.903          | 0          | 1         | 1         |
| Cct5_j1     | 20.7939   | 28.6762         | 0.463692   | 3.65E-05  | 0.0009131 |
| Cct5        | 62.2953   | 64.5916         | 0.0522254  | 0.548871  | 0.814457  |
| AK007719    | 2.41735   | 2.79125         | 0.207485   | 0.283636  | 0.632004  |
| Tspyl5      | 4.75484   | 4.00863         | -0.246287  | 0.061412  | 0.292698  |
| Rpl30_j6    | 0.232416  | 0.136729        | -0.765394  | 0.353089  | 0.689667  |
| Rpl30_j3    | 0.467005  | 0.402703        | -0.213721  | 0.700533  | 0.889857  |
| Rpl30_j5    | 0.649745  | 0.383208        | -0.761746  | 0.0555223 | 0.27529   |
| Rpl30_j1    | 0.0599121 | 0.0846466       | 0.498604   | 0.619292  | 1         |
| Hrsp12      | 14.7961   | 12.6892         | -0.221621  | 0.118685  | 0.428709  |
| Nipal2_j1   | 0.552949  | 0 -1.79769e+308 |            | 1.93E-11  | 2.24E-09  |
| Nipal2      | 3.50757   | 2.95982         | -0.244961  | 0.104206  | 0.400432  |
| Stk3_j2     | 0.219205  | 0.141614        | 0          | 1         | 1         |
| Stk3_j3     | 1.17843   | 1.27666         | 0          | 1         | 1         |
| Cox6c       | 24.4086   | 25.1636         | 0.0439478  | 0.639085  | 0.860252  |
| Rnf19a_j1   | 19.4914   | 15.0153         | 0          | 1         | 1         |
| Rnf19a      | 4.86547   | 2.9531          | 0          | 1         | 1         |
| Ankrd46_j3  | 51.9616   | 54.9314         | 0          | 1         | 1         |
| Ankrd46_j4  | 33.9679   | 30.6146         | 0          | 1         | 1         |
| Ankrd46     | 39.5455   | 35.9899         | 0          | 1         | 1         |
| Pabpc1      | 9.69936   | 6.45614         | 0          | 1         | 1         |
| Ywhaz_j3    | 8.30915   | 8.60558         | 0.050572   | 0.700757  | 0.890005  |
| Zfp706_j1   | 7.01293   | 5.0402          | 0          | 1         | 1         |
| Zfp706      | 13.3303   | 13.5457         | 0          | 1         | 1         |
| Ncald_j5    | 1.4588    | 0.545528        | 0          | 1         | 1         |
| Ncald_j6    | 5.22043   | 3.21368         | 0          | 1         | 1         |
| Ncald_j7    | 2.67451   | 1.63272         | 0          | 1         | 1         |
| Ncald_j4    | 4.93777   | 3.47954         | 0          | 1         | 1         |
| Rrm2b_j6    | 0.31213   | 0.476622        | 0          | 1         | 1         |
| Rrm2b       | 0.428744  | 0.122071        | 0          | 1         | 1         |
| Ubr5        | 6.43326   | 5.14767         | 0          | 1         | 1         |
| Ubr5_j5     | 1.35215   | 0.626037        | 0          | 1         | 1         |
| Klf10_j1    | 0.298673  | 0.16338         | 0          | 1         | 1         |
| Klf10       | 1.97489   | 2.00836         | 0          | 1         | 1         |
| Azin1       | 43.8007   | 48.928          | 0.159707   | 0.066154  | 0.307128  |
| Slc25a32    | 1.96583   | 1.66807         | 0          | 1         | 1         |
| XLOC_011380 | 0.670995  | 0.62698         | -0.0978837 | 0.718826  | 0.898857  |
| Dpys_j1     | 0.271097  | 0.18866         | -0.523018  | 0.538573  | 0.807968  |
| Dpys_j2     | 0.0655767 | 0 -1.79769e+308 |            | 0.0465496 | 1         |
| Dpys_j5     | 0.159581  | 0.0774582       | -1.0428    | 0.349812  | 0.687467  |

|                  |           |           |             |           |           |
|------------------|-----------|-----------|-------------|-----------|-----------|
| Lrp12            | 0.940376  | 1.4121    | 0.586531    | 0.0178362 | 0.130129  |
| Lrp12            | 8.38142   | 7.2778    | -0.203693   | 0.0673374 | 0.310319  |
| XLOC_011383      | 2.95401   | 2.78704   | -0.0839447  | 0.65205   | 0.866572  |
| Rspo2_j11        | 0.798313  | 1.51658   | 0           | 1         | 1         |
| Rspo2_j12        | 8.53788   | 9.3351    | 0           | 1         | 1         |
| Eif3e_j2         | 0.452643  | 1.30444   | 1.52698     | 0.001428  | 0.0189918 |
| Eif3e_j3         | 1.50943   | 0.792385  | -0.929734   | 0.0446998 | 0.241506  |
| Tmem74           | 6.88658   | 5.67857   | -0.27826    | 0.0071132 | 0.0667213 |
| Nudcd1           | 0.589023  | 0.566793  | 0           | 1         | 1         |
| Nudcd1           | 2.6509    | 2.16594   | 0           | 1         | 1         |
| Sybu_j1          | 6.93333   | 8.1017    | 0           | 1         | 1         |
| Sybu             | 17.0727   | 15.5413   | 0           | 1         | 1         |
| Kcnv1_j6         | 2.15793   | 2.01797   | 0           | 1         | 1         |
| Kcnv1_j3         | 2.07045   | 0.679183  | 0           | 1         | 1         |
| Csmd3_j1         | 0.182307  | 0.047125  | -1.95181    | 0.0444634 | 0.240553  |
| Csmd3_j7         | 0.159684  | 0.0809252 | -0.980557   | 0.10466   | 0.401541  |
| Csmd3_j8         | 0.12538   | 0.0958653 | -0.387228   | 0.719774  | 1         |
| Eif3h            | 1.10172   | 0.330267  | -1.73806    | 0.0067211 | 0.0637802 |
| Rad21            | 21.4423   | 20.3973   | -0.0720842  | 0.442483  | 0.750625  |
| Ext1             | 5.16326   | 4.2515    | -0.280308   | 0.0381673 | 0.217146  |
| Samd12_j6        | 0.712871  | 0.209242  | 0           | 1         | 1         |
| Samd12_j2        | 0.262596  | 9.62E-05  | 0           | 1         | 1         |
| Enpp2            | 0.490451  | 0.394333  | -0.314697   | 0.445648  | 0.753058  |
| Enpp2_j9         | 1.11593   | 1.29545   | 0.215202    | 0.406779  | 0.727764  |
| Taf2             | 4.14775   | 4.02989   | -0.0415884  | 0.742949  | 0.909993  |
| Taf2_j2          | 0.224513  | 0.147217  | -0.608852   | 0.2735    | 0.622618  |
| Dscc1_j1         | 0.18824   | 0.209227  | 0.152495    | 0.822869  | 0.942847  |
| Mrpl13_j2        | 13.9986   | 13.1034   | 0           | 1         | 1         |
| Mrpl13           | 14.266    | 14.7713   | 0           | 1         | 1         |
| MRPL13           | 3.66364   | 4.33987   | 0           | 1         | 1         |
| Sntb1_j3         | 2.15708   | 2.13025   | 0           | 1         | 1         |
| Sntb1_j2         | 0.767026  | 0.702161  | 0           | 1         | 1         |
| Der1_j1          | 20.9146   | 20.1953   | 0           | 1         | 1         |
| Zhx1             | 3.57489   | 3.51254   | 0           | 1         | 1         |
| Atad2_j3         | 0.513848  | 0.422635  | 0           | 1         | 1         |
| Atad2            | 1.07091   | 0.881458  | 0           | 1         | 1         |
| Fbxo32           | 1.46949   | 1.39786   | -0.0720891  | 0.640113  | 0.860827  |
| Klhl38_j1        | 0.0961892 | 0.0233455 | -2.04273    | 0.200686  | 1         |
| Tmem65           | 13.3815   | 14.1158   | 0           | 1         | 1         |
| Tatdn1           | 10.9219   | 10.9064   | -0.00205664 | 0.984297  | 0.995386  |
| Mtss1_j1         | 1.61523   | 1.69098   | 0.0661134   | 0.647819  | 0.864344  |
| E430025E21Rik_j1 | 5.32834   | 6.53362   | 0           | 1         | 1         |
| Fam49b_j3        | 1.2294    | 1.01245   | 0           | 1         | 1         |
| Fam49b           | 1.98774   | 2.88149   | 0           | 1         | 1         |
| Fam49b           | 2.04328   | 1.61306   | 0           | 1         | 1         |
| Asap1_j4         | 0.279798  | 0.195747  | 0           | 1         | 1         |
| Asap1_j6         | 1.11104   | 0.714135  | 0           | 1         | 1         |

|               |           |                        |            |           |           |
|---------------|-----------|------------------------|------------|-----------|-----------|
| Asap1_j7      | 4.71242   | 0.0505587              | 0          | 1         | 1         |
| Asap1_j17     | 13.1001   | 8.88428                | 0          | 1         | 1         |
| Adcy8_j1      | 0.913887  | 0.625919               | 0          | 1         | 1         |
| Adcy8         | 0.231881  | 0.585341               | 0          | 1         | 1         |
| Adcy8         | 0.834194  | 0.567318               | 0          | 1         | 1         |
| Oc90_j1       | 0.0924543 | 0 -1.79769e+308        | 0.0141704  |           | 1         |
| Kcnq3_j2      | 0.303066  | 0.0602158              | 0          | 1         | 1         |
| Kcnq3         | 1.87352   | 2.05633                | 0          | 1         | 1         |
| Lrrc6         | 0.465564  | 0.0971939              | -2.26004   | 0.0019238 | 0.0242294 |
| Sla           | 0.310401  | 0.108164               | -1.52091   | 0.0470165 | 0.248626  |
| Sla           | 0.128591  | 0.557432               | 2.11601    | 3.39E-05  | 0.0008576 |
| Ndr1_j4       | 4.41139   | 0.870498               | 0          | 1         | 1         |
| Ndr1          | 58.4539   | 64.3265                | 0          | 1         | 1         |
| St3gal1       | 0.405082  | 0.236551               | 0          | 1         | 1         |
| St3gal1       | 2.05796   | 1.44447                | 0          | 1         | 1         |
| Zfat_j1       | 0.430927  | 0.617085               | 0.518026   | 0.330301  | 0.672202  |
| Zfat_j2       | 0.0687983 | 0 -1.79769e+308        | 0.0037778  |           | 1         |
| Zfat_j6       | 0.368204  | 0.267345               | -0.461806  | 0.222694  | 0.569646  |
| XLOC_011435   | 0.0353129 | 0.0879523              | 1.31653    | 0.476138  | 1         |
| Col22a1_j2    | 0.12871   | 0.142332               | 0.145136   | 0.856881  | 1         |
| Kcnk9         | 0.138736  | 0.14061                | 0.0193631  | 0.964193  | 0.989953  |
| Eif2c2_j2     | 0.14829   | 0.0388701              | -1.93169   | 0.23476   | 0.582023  |
| Ptk2_j12      | 1.04087   | 0.97133                | 0          | 1         | 1         |
| Ptk2_j11      | 2.38262   | 1.82858                | 0          | 1         | 1         |
| Slc45a4_j5    | 0.817143  | 0.206016               | 0          | 1         | 1         |
| Slc45a4_j6    | 9.31001   | 5.44646                | 0          | 1         | 1         |
| Gm7935        | 15.3944   | 15.9415                | 0.0503827  | 0.665995  | 0.873396  |
| Arc_j1        | 1.69013   | 2.08831                | 0.305205   | 0.360417  | 0.695432  |
| Arc           | 0.515108  | 0.863629               | 0.745537   | 0.0160885 | 0.120835  |
| Arc           | 0.873617  | 1.28452                | 0.556161   | 0.0223957 | 0.152567  |
| Jrk           | 2.28985   | 2.29555                | 0.00358932 | 0.980918  | 0.994152  |
| Lypd2         | 0.657493  | 1.15934                | 0.818263   | 0.0462126 | 0.246432  |
| 2300005B03Rik | 2.05362   | 1.21952                | -0.751864  | 0.0171503 | 0.126567  |
| Lynx1_j2      | 32.7693   | 59.8698                | 0          | 1         | 1         |
| Lynx1         | 64.5824   | 57.7645                | 0          | 1         | 1         |
| Ly6a          | 5.38522   | 10.8147                | 0          | 1         | 1         |
| Ly6c1_j1      | 5.73459   | 5.15372                | 0          | 1         | 1         |
| Ly6h          | 3.74488   | 2.86187                | -0.387961  | 0.246955  | 0.594488  |
| Ly6h          | 5.04706   | 3.87594                | -0.380894  | 0.0606619 | 0.290288  |
| Top1mt        | 1.17961   | 1.42793                | 0.275616   | 0.147992  | 0.4767    |
| Zc3h3_j4      | 0.2589    | 0.155813               | -0.732579  | 1         | 1         |
| Naprt1_j5     | 0.387689  | 0.441117               | 0.186262   | 0.759438  | 0.91718   |
| Naprt1_j6     | 0.479604  | 0.381852               | -0.328831  | 0.534825  | 0.805935  |
| Eef1d         | 0         | 0.0693245 1.79769e+308 | 0.0953493  |           | 1         |
| Eef1d         | 14.0073   | 16.594                 | 0.244484   | 0.0154739 | 0.117492  |
| Eef1d_j1      | 1.24667   | 1.83673                | 0.559061   | 0.0021101 | 0.026064  |
| Pycrl_j1      | 7.88017   | 9.0079                 | 0.192965   | 0.205638  | 0.550043  |

|               |           |                 |            |           |           |
|---------------|-----------|-----------------|------------|-----------|-----------|
| Pycrl         | 0.918152  | 1.02262         | 0.15547    | 0.514047  | 0.793041  |
| Tsta3         | 13.3753   | 14.2753         | 0.0939441  | 0.488182  | 0.778703  |
| Tsta3         | 2.69679   | 2.15783         | -0.321664  | 0.24803   | 0.595382  |
| 2410075B13Rik | 0.54151   | 0.768272        | 0.504629   | 0.130182  | 0.449234  |
| Fam83h_j1     | 0.278423  | 5.60E-05        | -12.2803   | 0.869548  | 0.958473  |
| Fam83h        | 2.24312   | 2.74105         | 0.289226   | 0.0403491 | 0.225117  |
| Scrib_j11     | 0.806356  | 0.815064        | 0          | 1         | 1         |
| Puf60_j1      | 18.6899   | 15.2921         | 0          | 1         | 1         |
| Puf60         | 13.3842   | 11.5423         | 0          | 1         | 1         |
| Nrbp2_j1      | 23.7701   | 23.0371         | 0          | 1         | 1         |
| Nrbp2_j5      | 0.115622  | 0.161371        | 0          | 1         | 1         |
| Plec_j1       | 2.97479   | 2.79146         | -0.0917708 | 0.417335  | 0.734428  |
| Oplah         | 0.442609  | 0.324102        | 0          | 1         | 1         |
| Sharpin       | 5.07416   | 4.98064         | 0          | 1         | 1         |
| Bop1_j4       | 7.41515   | 8.36807         | 0          | 1         | 1         |
| Bop1          | 6.08996   | 5.39965         | 0          | 1         | 1         |
| Scrt1_j1      | 31.5288   | 19.3298         | -0.705844  | 8.86E-14  | 1.47E-11  |
| Scrt1         | 0.545755  | 0.372427        | -0.551297  | 0.0423883 | 0.232763  |
| Fbxl6         | 1.04443   | 0.930492        | -0.166655  | 0.611337  | 0.846879  |
| Cpsf1_j1      | 0.0643206 | 0.0999337       | 0          | 1         | 1         |
| Vps28_j3      | 75.0908   | 80.594          | 0.102035   | 0.283576  | 0.631938  |
| Tonsl_j2      | 4.26695   | 3.99199         | -0.0960989 | 0.433839  | 0.745068  |
| Cyhr1_j1      | 19.2527   | 18.3367         | -0.0703316 | 0.465283  | 0.765197  |
| Arhgap39_j7   | 2.4061    | 2.15692         | -0.157723  | 0.255981  | 0.604701  |
| Zfp251_j3     | 0.893183  | 0.551984        | 0          | 1         | 1         |
| Zfp251        | 3.84942   | 3.84882         | 0          | 1         | 1         |
| Zfp647        | 0.840113  | 0.995362        | 0.244637   | 0.380129  | 0.711149  |
| Rbfox2_j4     | 3.51852   | 2.28743         | 0          | 1         | 1         |
| Rbfox2_j6     | 8.92046   | 8.0382          | 0          | 1         | 1         |
| Rbfox2_j5     | 2.42444   | 3.14904         | 0          | 1         | 1         |
| Apol9a_j2     | 0.0579398 | 0 -1.79769e+308 | 0.0366293  | 0.0366293 | 1         |
| Apol9a_j1     | 0.116626  | 0.268215        | 1.2015     | 0.090893  | 0.370619  |
| Apol8_j1      | 0.229763  | 0.0163164       | -3.81575   | 0.0101112 | 0.086213  |
| Apol8         | 0.344178  | 0.0932348       | -1.88421   | 0.002957  | 0.0340717 |
| Myh9_j2       | 1.25368   | 0.195501        | 0          | 1         | 1         |
| Myh9          | 14.9417   | 14.7609         | 0          | 1         | 1         |
| Txn2          | 24.1515   | 29.1402         | 0          | 1         | 1         |
| Foxred2       | 0.3721    | 0.209247        | -0.830484  | 0.0405746 | 0.225987  |
| Eif3d_j1      | 9.86052   | 12.7124         | 0          | 1         | 1         |
| Eif3d_j2      | 8.95325   | 6.67349         | 0          | 1         | 1         |
| Eif3d         | 6.34138   | 6.5029          | 0          | 1         | 1         |
| Cacng2        | 4.48595   | 3.04232         | -0.560244  | 4.52E-05  | 0.0010943 |
| Cacng2_j2     | 1.05544   | 0.624986        | -0.755943  | 0.0032418 | 0.0366859 |
| Ift27_j1      | 1.48688   | 0.469356        | -1.66353   | 0.0004363 | 0.0072568 |
| Ift27_j2      | 0.121575  | 0 -1.79769e+308 | 0.0234857  | 0.0234857 | 1         |
| Pvalb_j2      | 0.536357  | 0.117613        | -2.18914   | 0.0294433 | 0.183424  |
| Csf2rb2_j3    | 0.161272  | 0.400625        | 1.31276    | 0.0143799 | 0.111597  |

|                  |           |                 |             |           |           |
|------------------|-----------|-----------------|-------------|-----------|-----------|
| Csf2rb2_j2       | 0.180592  | 0.234793        | 0.378652    | 0.433568  | 0.744891  |
| Csf2rb2_j7       | 0.0597161 | 0.0300366       | -0.991397   | 0.442153  | 1         |
| Tst              | 1.95667   | 2.09319         | 0.0973056   | 0.583249  | 0.833121  |
| Tmprss6_j2       | 0.0658047 | 0.0456622       | -0.527189   | 0.791605  | 1         |
| Tmprss6_j3       | 0.0774563 | 0 -1.79769e+308 |             | 0.0154604 | 1         |
| Il2rb_j3         | 0.143514  | 0.115468        | -0.313691   | 0.614876  | 0.847925  |
| C1qtnf6          | 0.485622  | 0.61751         | 0.346629    | 0.327667  | 0.670398  |
| Rac2             | 0.599622  | 1.1235          | 0.905868    | 0.0012456 | 0.0170395 |
| Elfn2_j2         | 0.286669  | 0.131034        | 0           | 1         | 1         |
| Elfn2            | 0.427954  | 0.581077        | 0           | 1         | 1         |
| Mfng_j1          | 0.0965039 | 0.212474        | 1.13863     | 0.249235  | 0.596716  |
| Mfng             | 0.860467  | 1.00224         | 0.220042    | 0.418505  | 0.735325  |
| Card10_j1        | 4.16279   | 2.33253         | 0           | 1         | 1         |
| Card10           | 0.404578  | 0.413061        | 0           | 1         | 1         |
| Ankrd54          | 4.08936   | 4.04976         | -0.0140388  | 0.935709  | 0.98034   |
| Sox10_j3         | 0.424938  | 0.548251        | 0           | 1         | 1         |
| Sox10            | 0.239937  | 1.47584         | 0           | 1         | 1         |
| Baiap2l2_j2      | 0.112762  | 0.0580302       | -0.958405   | 0.501495  | 1         |
| Baiap2l2_j4      | 0.100055  | 0.0272179       | -1.87817    | 0.363744  | 1         |
| Pla2g6           | 8.4115    | 8.96282         | 0           | 1         | 1         |
| Pla2g6_j3        | 1.60315   | 0               | 0           | 1         | 1         |
| Tmem184b_j1      | 14.3456   | 13.34           | 0           | 1         | 1         |
| Tmem184b         | 19.4397   | 17.4321         | 0           | 1         | 1         |
| Csnk1e           | 11.8306   | 19.2409         | 0           | 1         | 1         |
| Csnk1e           | 11.9922   | 10.4686         | 0           | 1         | 1         |
| Kcnj4_j2         | 0.567348  | 0.358931        | -0.660526   | 0.16474   | 0.500803  |
| Kcnj4            | 0.392166  | 0.304081        | -0.367006   | 0.198221  | 0.54132   |
| Ddx17_j3         | 0.0761101 | 0.0864934       | 0           | 1         | 1         |
| Ddx17            | 0.966261  | 0.73135         | 0           | 1         | 1         |
| Dmc1_j1          | 0.14873   | 0.00517211      | -4.8458     | 0.259954  | 0.608587  |
| 4933432B09Rik_j4 | 0.132268  | 0.08223         | -0.68573    | 0.312512  | 1         |
| 4933432B09Rik_j5 | 0.100333  | 0.098373        | -0.0284683  | 0.962446  | 1         |
| Sun2_j2          | 2.54118   | 3.52679         | 0           | 1         | 1         |
| Sun2             | 9.58465   | 10.2732         | 0           | 1         | 1         |
| Dnalc4           | 9.01496   | 8.11242         | 0           | 1         | 1         |
| Nptxr            | 8.83786   | 7.7396          | 0           | 1         | 1         |
| Cbx6             | 47.6232   | 44.7056         | 0           | 1         | 1         |
| Pdgfb            | 0.96095   | 0.950594        | -0.0156319  | 0.949458  | 0.985359  |
| Rpl3_j1          | 1.89977   | 2.3212          | 0           | 1         | 1         |
| Rpl3_j2          | 1.11578   | 0.797108        | 0           | 1         | 1         |
| Rps19bp1_j2      | 3.66417   | 4.37869         | 0.257014    | 0.369526  | 0.702946  |
| Rps19bp1         | 7.20101   | 9.62642         | 0.4188      | 0.0162    | 0.121522  |
| Mkl1             | 6.03806   | 6.21428         | 0.0415018   | 0.718226  | 0.898594  |
| Slc25a17         | 23.5075   | 23.4316         | -0.00466799 | 0.963912  | 0.989793  |
| St13_j3          | 0.548509  | 0.571224        | 0           | 1         | 1         |
| St13_j4          | 0.19683   | 0.155761        | 0           | 1         | 1         |
| Chadl            | 5.84334   | 5.34935         | -0.127431   | 0.348108  | 0.686627  |

|                  |           |           |               |           |           |
|------------------|-----------|-----------|---------------|-----------|-----------|
| Rangap1_j1       | 47.5631   | 54.4577   | 0             | 1         | 1         |
| Tob2_j2          | 0.221026  | 0         | -1.79769e+308 | 4.16E-08  | 2.50E-06  |
| Phf5a            | 35.5681   | 35.601    | 0.00133195    | 0.990586  | 0.997044  |
| Polr3h           | 6.44751   | 6.65145   | 0.0449278     | 0.640109  | 0.860827  |
| Pmm1             | 70.7978   | 85.4931   | 0.272102      | 0.0015558 | 0.0203408 |
| Pppde2           | 11.1807   | 10.2613   | 0             | 1         | 1         |
| Nhp2l1_j1        | 0.202809  | 0.148635  | 0             | 1         | 1         |
| Al848285_j1      | 0.113563  | 0         | -1.79769e+308 | 0.0396956 | 1         |
| Cenpm            | 0.321355  | 0.26963   | -0.253191     | 0.427709  | 0.741858  |
| Cenpm_j2         | 0.724042  | 0.698864  | -0.0510617    | 0.930907  | 0.978859  |
| Naga             | 8.62152   | 8.04881   | -0.099166     | 0.467923  | 0.766747  |
| Naga_j5          | 0.5313    | 0.392752  | -0.43591      | 0.43762   | 0.747795  |
| Ndufa6_j1        | 84.781    | 74.5401   | -0.185724     | 0.161419  | 0.496287  |
| Ndufa6           | 32.7849   | 30.8605   | -0.0872673    | 0.432597  | 0.744299  |
| Cyp2d22_j3       | 3.76017   | 3.53375   | -0.0895952    | 0.704244  | 0.89177   |
| Cyp2d22_j5       | 1.66736   | 1.20525   | -0.468229     | 0.13486   | 0.457099  |
| Cyp2d22_j6       | 2.44135   | 2.26863   | -0.105859     | 0.653634  | 0.867521  |
| Nfam1_j1         | 0.0606756 | 0.0422762 | -0.521272     | 0.698518  | 1         |
| Poldip3          | 18.5507   | 20.3162   | 0.131159      | 0.170304  | 0.507195  |
| Cyb5r3_j2        | 0.600726  | 0.719062  | 0             | 1         | 1         |
| Arfgap3          | 1.7727    | 0         | -1.79769e+308 | 1.31E-25  | 4.18E-23  |
| 1700001L05Rik_j3 | 2.6978    | 1.78579   | 0             | 1         | 1         |
| 1700001L05Rik_j2 | 4.03892   | 2.8893    | 0             | 1         | 1         |
| Pacsin2_j1       | 1.89508   | 2.17447   | 0             | 1         | 1         |
| Pacsin2_j2       | 2.07949   | 2.93237   | 0             | 1         | 1         |
| Ttll1            | 30.9441   | 34.2344   | 0.145783      | 0.124333  | 0.439475  |
| Mcat_j5          | 0.318069  | 0.172289  | 0             | 1         | 1         |
| Mcat             | 2.65492   | 2.97144   | 0             | 1         | 1         |
| Mcat_j2          | 0.538544  | 0.251791  | 0             | 1         | 1         |
| Ttll12           | 0.511088  | 0.510881  | -0.000584767  | 0.998166  | 0.999228  |
| Efcab6_j2        | 0.0468304 | 0         | -1.79769e+308 | 0.0582599 | 1         |
| Efcab6_j1        | 0.0936296 | 0         | -1.79769e+308 | 0.0106053 | 1         |
| Sult4a1          | 109.488   | 103.13    | 0             | 1         | 1         |
| 1810041L15Rik_j2 | 0.71268   | 0.300812  | 0             | 1         | 1         |
| 1810041L15Rik_j4 | 0.21444   | 0.0485889 | 0             | 1         | 1         |
| 1810041L15Rik_j5 | 0.485599  | 0         | 0             | 1         | 1         |
| 1810041L15Rik_j3 | 3.23279   | 1.28954   | 0             | 1         | 1         |
| Ldoc1l           | 10.1614   | 9.92339   | -0.0341956    | 0.733231  | 0.905831  |
| Phf21b_j2        | 0.145879  | 0         | -1.79769e+308 | 0.0009155 | 0.0133284 |
| Phf21b_j3        | 0.253982  | 0         | -1.79769e+308 | 1.87E-07  | 9.29E-06  |
| 5031439G07Rik_j2 | 4.74653   | 7.0001    | 0             | 1         | 1         |
| 5031439G07Rik    | 8.22816   | 7.35532   | 0             | 1         | 1         |
| XLOC_011571      | 0.0515322 | 0         | -1.79769e+308 | 0.0485023 | 1         |
| 2210021J22Rik_j1 | 0.638308  | 0.946743  | 0             | 1         | 1         |
| 2210021J22Rik_j2 | 5.46226   | 6.11471   | 0             | 1         | 1         |
| 2210021J22Rik    | 1.53288   | 1.99032   | 0             | 1         | 1         |
| Celsr1_j5        | 0.0896089 | 0.0572617 | -0.646071     | 0.179149  | 1         |

|            |           |           |               |           |           |
|------------|-----------|-----------|---------------|-----------|-----------|
| Celsr1_j7  | 0.15      | 0         | -1.79769e+308 | 1.08E-11  | 1.31E-09  |
| Celsr1_j6  | 0.175413  | 0.334025  | 0.929197      | 0.0014593 | 0.0193076 |
| Cerk_j5    | 12.0007   | 14.6369   | 0             | 1         | 1         |
| Cerk_j2    | 5.87387   | 6.05552   | 0             | 1         | 1         |
| Cerk       | 4.59851   | 4.1311    | 0             | 1         | 1         |
| Brd1_j1    | 2.52315   | 0.592779  | 0             | 1         | 1         |
| Alg12      | 5.02027   | 4.72229   | -0.0882782    | 0.55458   | 0.81765   |
| Ttll8_j2   | 0.21577   | 0.330277  | 0.614181      | 0.3586    | 0.693917  |
| AK006138   | 0.338693  | 0         | -1.79769e+308 | 0.0002121 | 0.004028  |
| Mlc1       | 0.749437  | 0.807372  | 0             | 1         | 1         |
| Tubgcp6_j1 | 0.353007  | 0.158318  | 0             | 1         | 1         |
| Hdac10_j1  | 2.24973   | 2.55344   | 0             | 1         | 1         |
| Hdac10     | 0.44073   | 0.613564  | 0             | 1         | 1         |
| Hdac10_j2  | 2.83774   | 2.76876   | 0             | 1         | 1         |
| Mapk11     | 14.704    | 12.5208   | 0             | 1         | 1         |
| Plxnb2     | 0.182975  | 0.24908   | 0             | 1         | 1         |
| Plxnb2_j6  | 1.11608   | 1.4937    | 0             | 1         | 1         |
| Fam116b_j2 | 0.327128  | 0.354563  | 0             | 1         | 1         |
| Fam116b_j1 | 0.187365  | 0         | 0             | 1         | 1         |
| Sbf1_j6    | 8.19144   | 8.8881    | 0             | 1         | 1         |
| Lmf2_j1    | 0.0550258 | 0         | 0             | 1         | 1         |
| Lmf2_j2    | 0.55244   | 0.48857   | 0             | 1         | 1         |
| Tymp_j3    | 4.64692   | 5.56455   | 0             | 1         | 1         |
| Odf3b      | 0.137078  | 0.0397298 | -1.7867       | 0.302268  | 1         |
| Cpt1b_j12  | 0.0618131 | 0         | -1.79769e+308 | 0.0510873 | 1         |
| Cpt1b_j13  | 0.0945031 | 0.209456  | 1.14822       | 0.139854  | 0.465246  |
| Cpt1b_j16  | 0.102781  | 0.110412  | 0.10332       | 0.916553  | 1         |
| Chkb_j1    | 3.47057   | 3.22956   | 0             | 1         | 1         |
| Chkb       | 6.55248   | 6.23967   | 0             | 1         | 1         |
| Arsa       | 0.374366  | 0.412804  | 0.141009      | 0.676671  | 0.87838   |
| Rabl2_j1   | 1.97903   | 2.09032   | 0             | 1         | 1         |
| Rabl2      | 3.39612   | 2.13346   | 0             | 1         | 1         |
| Syt10_j3   | 0.0602995 | 0         | -1.79769e+308 | 0.0834856 | 1         |
| Cpne8_j1   | 2.865     | 2.36543   | -0.276433     | 0.252595  | 0.600518  |
| Cpne8_j2   | 0.609698  | 0         | -1.79769e+308 | 3.93E-10  | 3.51E-08  |
| Cpne8      | 0.867774  | 0.809903  | -0.0995701    | 0.711371  | 0.895165  |
| Cpne8      | 8.7854    | 9.47779   | 0.109443      | 0.41139   | 0.730688  |
| Gm8759     | 158.809   | 194.462   | 0.292196      | 0.0014366 | 0.0190759 |
| Kif21a_j15 | 3.11616   | 42.5223   | 0             | 1         | 1         |
| Kif21a_j6  | 2.49903   | 6.50469   | 0             | 1         | 1         |
| Kif21a_j16 | 35.7867   | 21.0645   | 0             | 1         | 1         |
| Abcd2      | 2.29547   | 1.28114   | 0             | 1         | 1         |
| Slc2a13    | 1.30497   | 0.911766  | -0.517278     | 0.0096007 | 0.0831408 |
| Gxylt1_j3  | 0.203084  | 0.19818   | -0.0352697    | 0.945857  | 0.983787  |
| Gxylt1_j6  | 0.252516  | 0.24914   | -0.0194197    | 0.962038  | 0.989366  |
| YAF2       | 14.4811   | 11.3305   | 0             | 1         | 1         |
| Yaf2       | 10.9014   | 8.37761   | 0             | 1         | 1         |

|             |           |                 |            |           |          |
|-------------|-----------|-----------------|------------|-----------|----------|
| Zcrb1       | 2.70784   | 2.27057         | 0          | 1         | 1        |
| Prickle1    | 0.0532704 | 0 -1.79769e+308 | 0.0075344  |           | 1        |
| Prickle1    | 0.666063  | 0.000125973     | -12.3683   | 0.783361  | 0.926989 |
| Adamts20_j4 | 0.0811463 | 0 -1.79769e+308 | 1.36E-05   |           | 1        |
| Adamts20_j2 | 0.0491783 | 4.99E-05        | -9.94379   | 0.862305  | 1        |
| Pus7l_j1    | 0.285924  | 0.322107        | 0.171906   | 0.724443  | 0.901947 |
| Pus7l       | 0.683796  | 0.796938        | 0.220902   | 0.388731  | 0.716153 |
| Twf1_j5     | 0.196521  | 0.0714642       | -1.45939   | 0.120121  | 0.431505 |
| Nell2_j3    | 0.604847  | 0.554031        | 0          | 1         | 1        |
| Nell2_j4    | 0.489126  | 0.870815        | 0          | 1         | 1        |
| Nell2       | 0.798436  | 0.570583        | 0          | 1         | 1        |
| Nell2       | 1.38788   | 1.16824         | 0          | 1         | 1        |
| Nell2_j5    | 0.615164  | 0.136135        | 0          | 1         | 1        |
| Dbx2_j1     | 0.193417  | 0.113641        | -0.767226  | 0.523035  | 0.799177 |
| AK163711_j4 | 0.175802  | 0.152505        | -0.2051    | 0.687776  | 0.883941 |
| AK163711_j5 | 0.245758  | 0.208808        | -0.235059  | 0.686214  | 0.883052 |
| AK163711_j6 | 0.58877   | 0.314699        | -0.90373   | 0.201931  | 0.545319 |
| Scaf11_j2   | 5.68027   | 5.50652         | -0.0448162 | 0.672859  | 0.876537 |
| Slc38a1_j2  | 2.43238   | 4.60824         | 0          | 1         | 1        |
| Slc38a1_j3  | 0.540938  | 0.282514        | 0          | 1         | 1        |
| Slc38a1     | 2.05539   | 1.0983          | 0          | 1         | 1        |
| Slc38a2_j3  | 0.336945  | 0.200108        | 0          | 1         | 1        |
| Slc38a2_j5  | 1.22659   | 0.556581        | 0          | 1         | 1        |
| Slc38a2     | 23.1948   | 20.1292         | 0          | 1         | 1        |
| Amigo2      | 8.27489   | 5.335           | 0          | 1         | 1        |
| Rpap3       | 7.92122   | 7.35906         | -0.1062    | 0.387713  | 0.715426 |
| Rapgef3_j1  | 0.204522  | 0.220362        | 0.107619   | 0.837455  | 0.948017 |
| HDAC7       | 8.1779    | 7.16191         | 0          | 1         | 1        |
| Vdr_j1      | 0.162735  | 0.0970843       | -0.745219  | 0.320671  | 0.663889 |
| Asb8        | 9.95966   | 9.27838         | 0          | 1         | 1        |
| Asb8        | 4.81318   | 3.64067         | 0          | 1         | 1        |
| Zfp641_j6   | 0.701971  | 0.442498        | -0.665741  | 0.0321583 | 0.194495 |
| Zfp641_j5   | 0.143912  | 0.246528        | 0.776559   | 0.0974952 | 0.385892 |
| Zfp641_j2   | 0.3357    | 0.225477        | -0.574195  | 0.117846  | 0.427133 |
| Zfp641_j7   | 0.119629  | 0.0885008       | -0.434804  | 0.501334  | 1        |
| Zfp641      | 0.376676  | 0.63461         | 0.752544   | 0.0209197 | 0.145317 |
| Ccnt1_j2    | 0.228333  | 0.704524        | 0          | 1         | 1        |
| Adcy6_j1    | 0.275178  | 0.228607        | -0.267492  | 0.494493  | 0.782504 |
| Adcy6_j4    | 0.256027  | 0.204355        | -0.325222  | 0.416533  | 0.733896 |
| Ddx23       | 47.5476   | 52.5226         | 0.143566   | 0.0933138 | 0.376016 |
| Rnd1        | 1.42615   | 4.07523         | 1.51476    | 2.22E-16  | 5.36E-14 |
| Arf3_j4     | 6.80304   | 4.92861         | 0          | 1         | 1        |
| Arf3        | 10.5779   | 10.3119         | 0          | 1         | 1        |
| Ddn         | 0.992551  | 0.620383        | 0          | 1         | 1        |
| Prkag1      | 22.1448   | 22.3981         | 0.0164109  | 0.883611  | 0.963053 |
| Mll2_j4     | 0.551767  | 0.539029        | -0.0336958 | 0.865978  | 0.957278 |
| Mll2_j3     | 0.171616  | 0.137932        | -0.315226  | 0.358484  | 0.693858 |



|             |           |                 |            |           |           |
|-------------|-----------|-----------------|------------|-----------|-----------|
| Dhh         | 11.2679   | 11.1153         | -0.0196719 | 0.843852  | 0.950604  |
| Lmbr1_lj6   | 0.435543  | 0.508722        | 0          | 1         | 1         |
| Lmbr1_lj2   | 1.85906   | 2.47849         | 0          | 1         | 1         |
| Lmbr1_lj3   | 0.720369  | 0.202849        | 0          | 1         | 1         |
| Lmbr1_lj4   | 0.67119   | 0.148368        | 0          | 1         | 1         |
| Lmbr1       | 2.82263   | 3.56219         | 0          | 1         | 1         |
| C1ql4       | 7.60406   | 4.61277         | -0.721137  | 4.05E-07  | 1.85E-05  |
| Fmnl3_j3    | 0.21263   | 0.287235        | 0.433887   | 0.330953  | 0.672743  |
| Fmnl3       | 0.618393  | 0.0862858       | -2.84133   | 9.06E-06  | 0.000285  |
| Nckap5l_j7  | 0.243497  | 0               | 0          | 1         | 1         |
| Nckap5l_j3  | 2.06157   | 0.647093        | 0          | 1         | 1         |
| Nckap5l     | 4.42632   | 4.36626         | 0          | 1         | 1         |
| Bcdin3d     | 3.18284   | 3.39546         | 0.0932944  | 0.653461  | 0.867469  |
| Faim2_j1    | 0.152512  | 0 -1.79769e+308 |            | 0.000119  | 0.0024865 |
| Faim2       | 35.075    | 20.7302         | -0.758707  | 0         | 0         |
| Racgap1_j3  | 0.115875  | 0 -1.79769e+308 |            | 0.0014013 | 1         |
| Racgap1_j5  | 0.997391  | 0.762407        | -0.387598  | 0.188964  | 0.530568  |
| Lass5       | 6.71304   | 6.106           | 0          | 1         | 1         |
| Lass5_j6    | 1.43307   | 1.79281         | 0          | 1         | 1         |
| Lima1       | 1.45978   | 2.09704         | 0          | 1         | 1         |
| Lima1       | 0.90468   | 0.635503        | 0          | 1         | 1         |
| Slc11a2     | 0         | 1.35835         | 0          | 1         | 1         |
| Slc11a2_j3  | 0.0339511 | 0.33368         | 0          | 1         | 1         |
| Slc11a2     | 5.33598   | 3.89088         | 0          | 1         | 1         |
| Csrnp2      | 1.16352   | 1.19693         | 0.040843   | 0.846232  | 0.951378  |
| Tcfcp2_j1   | 0.0727999 | 0.0410035       | 0          | 1         | 1         |
| Tcfcp2      | 1.4138    | 0.911487        | 0          | 1         | 1         |
| Pou6f1_j4   | 3.59321   | 3.03998         | 0          | 1         | 1         |
| Pou6f1      | 1.08589   | 0.979299        | 0          | 1         | 1         |
| Pou6f1_j3   | 4.47948   | 3.47811         | 0          | 1         | 1         |
| Smagp       | 1.05207   | 1.55763         | 0.566127   | 0.0916152 | 0.371965  |
| Smagp       | 0.338754  | 0.54276         | 0.680077   | 0.231965  | 0.57898   |
| BC141885_j2 | 0.0486667 | 0.0525276       | 0.110142   | 0.941759  | 1         |
| Cela1_j2    | 0.542487  | 0.397846        | -0.447376  | 0.418789  | 0.735525  |
| Galnt6      | 0.772211  | 1.92285         | 0          | 1         | 1         |
| AK146183    | 0.523985  | 0.383136        | 0          | 1         | 1         |
| AK146183_j1 | 0.524589  | 0.5261          | 0          | 1         | 1         |
| Spryd3_j2   | 49.4872   | 38.7321         | 0          | 1         | 1         |
| Csad_j1     | 0.620635  | 0.569162        | 0          | 1         | 1         |
| Itgb7       | 0.259169  | 0.256781        | 0          | 1         | 1         |
| Rarg_j3     | 0.956363  | 0               | 0          | 1         | 1         |
| Rarg        | 7.1305    | 6.02029         | 0          | 1         | 1         |
| Aaas        | 7.80185   | 8.26293         | 0.0828374  | 0.528212  | 0.801996  |
| Map3k12_j4  | 8.68369   | 9.19748         | 0          | 1         | 1         |
| Atf7_j2     | 0.819587  | 0.885601        | 0.111759   | 0.518043  | 0.796161  |
| Calcoco1    | 13.9832   | 14.5566         | 0.0579861  | 0.571516  | 0.826908  |
| AK035706    | 0.167424  | 0.195331        | 0.222417   | 0.617812  | 0.849619  |

|                   |            |           |               |           |           |
|-------------------|------------|-----------|---------------|-----------|-----------|
| XLOC_011689       | 0.0928571  | 0.0586537 | -0.662791     | 0.503426  | 1         |
| Smug1_j2          | 1.08287    | 0.448783  | -1.27078      | 0.0006742 | 0.0104123 |
| Cbx5              | 7.63341    | 7.04386   | -0.115963     | 0.231629  | 0.578702  |
| Zfp385a_j1        | 14.6516    | 10.5379   | 0             | 1         | 1         |
| Zfp385a_j2        | 0.190939   | 0         | 0             | 1         | 1         |
| ltga5_j4          | 0.21807    | 0.0904109 | 0             | 1         | 1         |
| Ppp1r1a           | 5.1136     | 4.59688   | -0.153686     | 0.204508  | 0.548638  |
| Plcx3_j1          | 3.02944    | 1.14616   | 0             | 1         | 1         |
| Ttc33_j3          | 0.711422   | 1.08945   | 0             | 1         | 1         |
| Ttc33_j4          | 1.9272     | 0.971106  | 0             | 1         | 1         |
| Dab2_j2           | 0.416395   | 0.246252  | 0             | 1         | 1         |
| Dab2_j1           | 0          | 0.0999768 | 0             | 1         | 1         |
| Fyb_j5            | 0.568843   | 0.424531  | -0.422161     | 0.170221  | 0.507195  |
| Nup155_j1         | 0.586192   | 1.20696   | 0             | 1         | 1         |
| 2410089E03Rik_j9  | 0.34712    | 0.422958  | 0.285083      | 0.410428  | 0.730298  |
| 2410089E03Rik_j11 | 0.134655   | 0         | -1.79769e+308 | 0.000238  | 1         |
| 2410089E03Rik_j14 | 1.70736    | 2.41837   | 0.502267      | 0.0563638 | 0.277794  |
| 2410089E03Rik_j17 | 0.114089   | 0         | -1.79769e+308 | 0.0433451 | 1         |
| 2410089E03Rik_j20 | 1.46599    | 1.83652   | 0.325094      | 0.630953  | 0.856499  |
| XLOC_010947       | 0.823165   | 0.80182   | -0.037903     | 0.87502   | 0.96023   |
| Capsl_j1          | 0.17685    | 0.0651814 | -1.44         | 0.130792  | 0.450257  |
| Drosha_j2         | 4.4724     | 2.56927   | 0             | 1         | 1         |
| Drosha_j6         | 18.5122    | 19.2951   | 0             | 1         | 1         |
| Cdh9_j4           | 0.551751   | 0.445983  | 0             | 1         | 1         |
| Cdh9_j5           | 0.383584   | 0.426049  | 0             | 1         | 1         |
| Cdh10_j2          | 2.56424    | 1.97012   | -0.380245     | 0.0385882 | 0.2188    |
| Myo10_j3          | 0.707434   | 0.3251    | 0             | 1         | 1         |
| March11_j4        | 0.0599758  | 0         | -1.79769e+308 | 0.176543  | 1         |
| XLOC_010975       | 0.156683   | 0.154962  | -0.0159351    | 0.976641  | 0.993228  |
| Ctnnd2_j2         | 0.891198   | 0.17747   | 0             | 1         | 1         |
| Ctnnd2_j5         | 0          | 0.0661056 | 0             | 1         | 1         |
| Cmb1_j1           | 0.00996409 | 0.30422   | 4.93223       | 0.260769  | 0.609596  |
| Mtdh_j2           | 0.162048   | 0.119628  | 0             | 1         | 1         |
| Matn2_j1          | 0.396903   | 0.307102  | 0             | 1         | 1         |
| Kcns2_j1          | 0.00622832 | 0.0896588 | 3.84753       | 0.436487  | 1         |
| Osr2_j3           | 0.189035   | 0.0632322 | -1.57992      | 0.294005  | 0.640867  |
| Osr2              | 0.117591   | 0.369564  | 1.65204       | 0.016521  | 0.12319   |
| Vps13b_j5         | 0.14849    | 0.112854  | -0.395915     | 0.569864  | 0.826046  |
| Spag1             | 0.443514   | 0.147168  | -1.59151      | 0.0014555 | 0.0192631 |
| Spag1_j8          | 0.161849   | 0.0885186 | -0.870598     | 0.243893  | 0.591133  |
| XLOC_010995       | 0.0495428  | 0.037368  | -0.406872     | 0.819947  | 1         |
| Baalc             | 2.12008    | 2.75875   | 0.379897      | 0.0867804 | 0.360114  |
| Fzd6_j1           | 0.229596   | 0.240338  | 0.0659664     | 0.951148  | 0.985865  |
| Fzd6_j2           | 0.165113   | 0.46025   | 1.47897       | 0.0011606 | 0.0161023 |
| Rims2_j5          | 0.815273   | 1.37116   | 0.750038      | 0.0001061 | 0.0022658 |
| Rims2_j10         | 0.837283   | 0.319898  | -1.3881       | 4.10E-05  | 0.0010074 |
| Rims2             | 8.33785    | 6.70597   | -0.314228     | 0.0113329 | 0.0940621 |

|                |           |                       |            |           |           |
|----------------|-----------|-----------------------|------------|-----------|-----------|
| XLOC_011008    | 0.11615   | 0.0785842             | -0.563672  | 0.715957  | 1         |
| A930017M01Rik  | 0.110769  | 0.208201              | 0.910429   | 0.128064  | 0.445967  |
| XLOC_011018    | 1.79946   | 1.96191               | 0.124698   | 0.764561  | 0.919275  |
| AK171902       | 7.92749   | 5.50294               | 0          | 1         | 1         |
| Mtbp_j2        | 0.0583074 | 0                     | 0          | 1         | 1         |
| Wdr67_j10      | 0.0471465 | 0 -1.79769e+308       |            | 0.0576491 | 1         |
| D15Ertd621e_j1 | 0.13536   | 0.173556              | 0          | 1         | 1         |
| 9930014A18Rik  | 0.0550793 | 0.0436799             | -0.334539  | 0.849919  | 1         |
| Myc            | 6.69678   | 8.74386               | 0.384803   | 0.0034006 | 0.038051  |
| Pvt1_j9        | 0.74704   | 0.465028              | -0.683869  | 0.0312967 | 0.190967  |
| Efr3a_j3       | 5.05398   | 3.51507               | 0          | 1         | 1         |
| Efr3a_j5       | 8.37214   | 7.42916               | 0          | 1         | 1         |
| XLOC_011050    | 2.84757   | 3.78595               | 0          | 1         | 1         |
| Phf20l1_j3     | 0.758987  | 0.819028              | 0          | 1         | 1         |
| Phf20l1_j5     | 0.927265  | 0.812335              | 0          | 1         | 1         |
| Phf20l1_j4     | 0.164093  | 0.0236876             | 0          | 1         | 1         |
| Elm1           | 0         | 0.236233 1.79769e+308 |            | 4.38E-05  | 0.0010657 |
| Khdrbs3_j2     | 0.679061  | 1.1157                | 0          | 1         | 1         |
| Khdrbs3_j1     | 8.84034   | 14.1534               | 0          | 1         | 1         |
| Chrac1         | 7.91601   | 8.53183               | 0.108082   | 0.468116  | 0.766788  |
| Bai1_j5        | 0.540956  | 0.625358              | 0.209171   | 0.62503   | 0.853689  |
| Bai1_j10       | 4.63485   | 4.53848               | -0.0303147 | 0.889723  | 0.964993  |
| Ly6e           | 0.126111  | 0.244013              | 0          | 1         | 1         |
| Ly6g_j2        | 0.421668  | 2.406                 | 0          | 1         | 1         |
| Rhpn1_j7       | 0.987087  | 1.25886               | 0.350866   | 0.4546    | 0.758767  |
| Gsdmd_j5       | 0.0503752 | 0.32738               | 2.70018    | 0.0122028 | 0.0994196 |
| Zfp707         | 0.0550934 | 0.0738021             | 0.421783   | 0.766566  | 1         |
| Grina          | 338.328   | 335.093               | -0.0138611 | 0.874775  | 0.960191  |
| Gpaa1_j3       | 0.0568075 | 0.0690771             | 0          | 1         | 1         |
| Gpaa1_j4       | 0.0901517 | 0.129784              | 0          | 1         | 1         |
| Cyc1_j2        | 45.4751   | 48.5158               | 0          | 1         | 1         |
| Maf1_j1        | 0.285531  | 0.319876              | 0          | 1         | 1         |
| Brp16_j5       | 0.0818972 | 0.207049              | 1.33809    | 0.187344  | 0.528303  |
| Heatr7a_j4     | 1.65666   | 1.85783               | 0          | 1         | 1         |
| Kifc2_j5       | 0.20911   | 0.392388              | 0          | 1         | 1         |
| Ppp1r16a_j10   | 0.0942817 | 0.124836              | 0.404984   | 0.47223   | 1         |
| Ppp1r16a_j11   | 0.221794  | 0.304805              | 0.458669   | 0.23258   | 0.579685  |
| XLOC_011102    | 0.0838643 | 0.154269              | 0.879316   | 0.495855  | 1         |
| Rpl8_j2        | 30.8002   | 19.5683               | 0          | 1         | 1         |
| XLOC_011105    | 0.133671  | 0 -1.79769e+308       |            | 0.0108663 | 1         |
| Apol9b         | 0.195719  | 0.16208               | -0.27208   | 0.730592  | 0.904795  |
| Apol9b         | 0         | 0.174825 1.79769e+308 |            | 0.0101503 | 0.0864559 |
| Mpst           | 0.890721  | 1.16642               | 0.389047   | 0.355733  | 0.691582  |
| Kctd17         | 10.2809   | 10.0909               | 0          | 1         | 1         |
| Kctd17_j3      | 31.118    | 30.8386               | 0          | 1         | 1         |
| XLOC_011113    | 0.17193   | 0.12455               | -0.465094  | 0.500025  | 0.784934  |
| Cyth4_j1       | 0.0992455 | 0.0839592             | -0.241312  | 0.823201  | 1         |

|               |            |           |               |           |           |
|---------------|------------|-----------|---------------|-----------|-----------|
| Gga1          | 17.5756    | 18.3201   | 0.0598556     | 0.540704  | 0.809004  |
| Sh3bp1_j1     | 0.25058    | 0.279407  | 0.157097      | 0.696352  | 0.888069  |
| Sh3bp1_j4     | 0.415221   | 0.451774  | 0.121723      | 0.797221  | 0.932581  |
| Pdpx_j1       | 5.73669    | 5.46304   | -0.0705146    | 0.699858  | 0.889482  |
| Eif3l         | 0.0501857  | 0.446471  | 3.15322       | 0.0002158 | 0.0040823 |
| Gm10863_j5    | 0.961347   | 0.759154  | -0.340664     | 0.374225  | 0.706986  |
| Maff          | 0.526369   | 0.500336  | 0             | 1         | 1         |
| XLOC_011139   | 0.0802541  | 0.140545  | 0.808389      | 0.409097  | 1         |
| XLOC_011139   | 0.195859   | 0.141833  | -0.465623     | 0.618345  | 0.850061  |
| XLOC_011139   | 0.578601   | 0         | -1.79769e+308 | 2.25E-06  | 8.44E-05  |
| Syng1_j3      | 107.257    | 91.8867   | 0             | 1         | 1         |
| Cacna1i_j9    | 0.00252405 | 0.1056    | 5.38673       | 0.117704  | 1         |
| Rbx1_j3       | 40.3727    | 41.4473   | 0             | 1         | 1         |
| Ep300_j2      | 1.31436    | 1.3087    | 0             | 1         | 1         |
| Zc3h7b        | 6.89804    | 5.15495   | 0             | 1         | 1         |
| Aco2_j1       | 9.32156    | 6.32427   | -0.559673     | 0.0001025 | 0.002204  |
| Csdc2         | 12.8736    | 17.5974   | 0.45094       | 1.14E-05  | 0.0003472 |
| Ccdc134_j1    | 1.67486    | 2.04288   | 0             | 1         | 1         |
| Sept3         | 1.6103     | 1.42247   | -0.178931     | 0.450597  | 0.756203  |
| 1500032L24Rik | 67.6187    | 71.0894   | 0.0722135     | 0.513268  | 0.792548  |
| Tspo_j1       | 2.1936     | 2.15002   | 0             | 1         | 1         |
| Mpped1_j4     | 0.172433   | 0.898458  | 2.38141       | 2.03E-06  | 7.67E-05  |
| Samm50        | 6.54609    | 7.27003   | 0.151328      | 0.177564  | 0.516957  |
| Parvb_j3      | 0.523705   | 0.360728  | 0             | 1         | 1         |
| Prr5          | 0.541356   | 0.418365  | -0.371814     | 0.263514  | 0.612282  |
| Nup50_j2      | 0.103142   | 0.253166  | 1.29545       | 0.0235633 | 0.157635  |
| Fbln1         | 0.268814   | 0.42403   | 0.657559      | 0.150151  | 0.480121  |
| Fbln1_j3      | 0.121888   | 0.232428  | 0.931235      | 0.166993  | 0.503276  |
| Atxn10_j1     | 0.233076   | 1.9089    | 0             | 1         | 1         |
| Atxn10_j4     | 27.1335    | 26.9231   | 0             | 1         | 1         |
| Gm4825        | 0.0792327  | 0.117088  | 0.563425      | 0.686695  | 1         |
| XLOC_011191   | 0.143951   | 0.0650124 | -1.14679      | 0.397559  | 0.721918  |
| Gramd4_j5     | 2.74995    | 3.44166   | 0             | 1         | 1         |
| Tbc1d22a_j7   | 1.46982    | 1.19214   | -0.302093     | 0.482585  | 0.775744  |
| Tbc1d22a_j8   | 0.0487152  | 0.11588   | 1.25018       | 0.346348  | 1         |
| Pim3_j3       | 25.9109    | 29.8742   | 0.205341      | 0.0599873 | 0.28839   |
| XLOC_011202   | 0.998701   | 1.26696   | 0.343251      | 0.454669  | 0.758773  |
| Mov10l1_j1    | 0.0991275  | 0.13008   | 0.392038      | 0.67726   | 1         |
| Panx2_j2      | 0.823056   | 1.05903   | 0             | 1         | 1         |
| XLOC_011206   | 0.0818777  | 0.0969142 | 0.243237      | 0.792387  | 1         |
| Ncaph2_j1     | 6.65628    | 8.2265    | 0             | 1         | 1         |
| Ncaph2_j6     | 2.3997     | 2.33067   | 0             | 1         | 1         |
| XLOC_011213   | 0.602665   | 0.556374  | -0.115302     | 0.616086  | 0.848645  |
| Shank3_j4     | 0.0921758  | 0.115836  | 0.32962       | 0.552551  | 1         |
| Ano6          | 1.10571    | 0.813789  | 0             | 1         | 1         |
| Gm4371_j6     | 0.0611855  | 0.274731  | 2.16676       | 0.0874315 | 0.361852  |
| XLOC_011235   | 0          | 0.10824   | 1.79769e+308  | 0.174206  | 1         |

|                  |             |           |             |           |           |
|------------------|-------------|-----------|-------------|-----------|-----------|
| Fam113b_j1       | 1.82489     | 1.27319   | 0           | 1         | 1         |
| Tmem106c         | 1.40174     | 1.54596   | 0.141277    | 0.731325  | 0.904922  |
| Dnajc22_j8       | 0.0243445   | 0.115305  | 2.24379     | 0.332234  | 1         |
| Prpf40b_j1       | 0.677273    | 0.172622  | -1.97212    | 0.000933  | 0.0135229 |
| Tmbim6_j1        | 5.16361     | 3.25257   | 0           | 1         | 1         |
| Smarcd1_j1       | 0.451059    | 0.209375  | -1.10722    | 0.0036103 | 0.0399016 |
| Larp4_j7         | 7.46057     | 6.39121   | -0.223196   | 1         | 1         |
| Dip2b_j6         | 5.41875     | 5.74214   | 0           | 1         | 1         |
| Gm5474           | 0.889584    | 0.720574  | -0.303985   | 0.51121   | 0.791493  |
| Mettl7a1_j1      | 9.06673     | 8.44082   | 0           | 1         | 1         |
| Dazap2           | 25.0248     | 24.2217   | 0           | 1         | 1         |
| Scn8a_j1         | 1.57419     | 1.80876   | 0           | 1         | 1         |
| Grasp_j1         | 1.98609     | 1.23143   | -0.689603   | 0.0089196 | 0.0786254 |
| Nr4a1_j4         | 5.99589     | 5.92322   | 0           | 1         | 1         |
| 6030408B16Rik_j1 | 0.0705963   | 0.120925  | 0.776443    | 0.527135  | 1         |
| Tenc1_j3         | 3.31851     | 3.1491    | 0           | 1         | 1         |
| Igfbp6_j1        | 6.58769     | 11.8225   | 0           | 1         | 1         |
| Soat2_j4         | 1.55171     | 1.46508   | -0.0828778  | 0.794389  | 0.931431  |
| Zfp740_j2        | 1.40765     | 0.211426  | 0           | 1         | 1         |
| Mfsd5_j1         | 24.4429     | 24.7987   | 0.0208492   | 0.84749   | 0.951788  |
| XLOC_011290      | 0.0322246   | 0.0508482 | 0.658036    | 0.669154  | 1         |
| Pfdn5            | 11.4855     | 13.9341   | 0.278811    | 0.0961952 | 0.382903  |
| Myg1_j4          | 1.13807     | 2.0854    | 0.873731    | 0.046797  | 0.248163  |
| Amhr2_j6         | 1.04651     | 1.0403    | -0.00859545 | 0.985295  | 0.995689  |
| Tarbp2_j3        | 3.2822      | 3.58876   | 0.128826    | 0.523721  | 0.799537  |
| Hoxc10_j1        | 0.31206     | 0.425133  | 0.446088    | 0.550476  | 0.815351  |
| Hoxc9_j3         | 0.218939    | 0.533966  | 0           | 1         | 1         |
| Hoxc6_j1         | 2.29803     | 1.71438   | 0           | 1         | 1         |
| Hoxc4_j3         | 0.278467    | 0.0613291 | 0           | 1         | 1         |
| Nckap1l_j1       | 0.0764301   | 0.0483095 | -0.661834   | 0.807629  | 1         |
| AW549877         | 9.26167     | 7.87718   | 0           | 1         | 1         |
| BC157982_j2      | 0.161182    | 0.0236956 | -2.766      | 0.0836532 | 0.352594  |
| Osmr_j3          | 6.29985     | 6.33844   | 0           | 1         | 1         |
| Osmr_j5          | 3.94201     | 2.84093   | 0           | 1         | 1         |
| Egflam_j2        | 0.509279    | 1.43181   | 0           | 1         | 1         |
| Wdr70_j1         | 1.17281     | 0.914207  | 0           | 1         | 1         |
| Wdr70            | 1.74713     | 1.77873   | 0           | 1         | 1         |
| Slc1a3           | 0.567567    | 0.723998  | 0.351195    | 0.306512  | 0.65175   |
| Skp2             | 0.000182808 | 0.237297  | 10.3421     | 0.769188  | 0.921491  |
| Dnajc21          | 6.06116     | 4.40426   | 0           | 1         | 1         |
| Rai14_j2         | 0.35629     | 0.65424   | 0           | 1         | 1         |
| Pdzd2_j3         | 4.94652     | 3.95193   | 0           | 1         | 1         |
| Pdzd2_j4         | 0.197878    | 0.53744   | 0           | 1         | 1         |
| Pdzd2_j11        | 0.13672     | 0.038233  | 0           | 1         | 1         |
| Cdh6_j2          | 0.0597819   | 0.107531  | 0           | 1         | 1         |
| XLOC_011345      | 0.0182632   | 0.0509182 | 1.47924     | 0.432785  | 1         |
| Fam105b_j2       | 1.2041      | 1.52692   | 0.34267     | 0.223363  | 0.570386  |

|               |             |                 |            |           |           |
|---------------|-------------|-----------------|------------|-----------|-----------|
| Fam105b_j1    | 0.249192    | 0.00178409      | -7.12593   | 0.299179  | 0.646115  |
| Fam105a_j1    | 0.129855    | 0.0336947       | -1.94631   | 0.21915   | 1         |
| Trio_j1       | 0.403427    | 0.745359        | 0          | 1         | 1         |
| Trio_j4       | 0.0985762   | 0.128266        | 0          | 1         | 1         |
| March6_j1     | 0.227068    | 0.531347        | 0          | 1         | 1         |
| Rpl30_j4      | 2.93292     | 3.2504          | 0.148278   | 0.523699  | 0.799527  |
| Hrsp12_j1     | 11.996      | 9.36161         | -0.357723  | 0.141921  | 0.46851   |
| Nipal2_j2     | 3.14152     | 3.74372         | 0.25301    | 0.125382  | 0.441136  |
| Ankrd46_j2    | 7.23097     | 4.25899         | 0          | 1         | 1         |
| Snx31         | 0.0849797   | 0.0288818       | -1.55696   | 0.291755  | 1         |
| Snx31         | 3.32E-06    | 0.13523         | 15.3152    | 0.994826  | 1         |
| Pabpc1_j2     | 8.86164     | 14.094          | 0          | 1         | 1         |
| XLOC_011367   | 0.12887     | 0.135773        | 0.0752809  | 0.955171  | 1         |
| Ywhaz_j1      | 2.2531      | 2.17546         | -0.0505868 | 0.790434  | 0.930178  |
| Ncald         | 13.7797     | 12.1186         | 0          | 1         | 1         |
| Rrm2b_j5      | 0.319547    | 0.200486        | 0          | 1         | 1         |
| Ubr5_j1       | 2.07729     | 2.21332         | 0          | 1         | 1         |
| Ubr5_j2       | 0.523644    | 1.93773         | 0          | 1         | 1         |
| Azin1_j1      | 7.54596     | 8.59675         | 0.188086   | 0.132374  | 0.452706  |
| Rspo2_j3      | 0.181085    | 0.100844        | 0          | 1         | 1         |
| Eif3e_j1      | 16.9456     | 17.9734         | 0.0849565  | 0.473378  | 0.770096  |
| Eif3e         | 0.301198    | 1.15762         | 1.94238    | 0.0002994 | 0.005336  |
| Nudcd1_j2     | 1.45724     | 1.337           | 0          | 1         | 1         |
| Sybu_j6       | 2.45784     | 4.90786         | 0          | 1         | 1         |
| Kcnv1_j5      | 1.06967     | 1.50812         | 0          | 1         | 1         |
| Ext1_j1       | 0.224288    | 0.946294        | 2.07694    | 0.003978  | 0.0427297 |
| Samd12_j1     | 0           | 0.177984        | 0          | 1         | 1         |
| Enpp2_j6      | 0.160835    | 0 -1.79769e+308 | 0.0001914  | 0.0036987 |           |
| Mrpl13_j4     | 0.0526986   | 0               | 0          | 1         | 1         |
| Sntb1         | 1.52885     | 2.2014          | 0          | 1         | 1         |
| Der1          | 8.45323     | 8.6961          | 0          | 1         | 1         |
| Atad2_j5      | 0.0479558   | 0.112324        | 0          | 1         | 1         |
| Tmem65_j2     | 0.104029    | 0.397803        | 0          | 1         | 1         |
| E430025E21Rik | 3.57463     | 1.72471         | 0          | 1         | 1         |
| Asap1_j10     | 4.4641      | 5.46874         | 0          | 1         | 1         |
| Asap1         | 4.04454     | 2.95341         | 0          | 1         | 1         |
| Lrrc6_j1      | 0.000934156 | 0.0987265       | 6.72363    | 0.482266  | 1         |
| Ndr1_j1       | 0           | 1.25473         | 0          | 1         | 1         |
| St3gal1_j1    | 0.16255     | 0               | 0          | 1         | 1         |
| Zfat_j3       | 0.0823076   | 0.0557574       | -0.561862  | 0.578544  | 1         |
| Trappc9_j1    | 23.903      | 22.6447         | 0          | 1         | 1         |
| Ptk2_j1       | 0.87468     | 0.453393        | 0          | 1         | 1         |
| Ptk2_j3       | 0.897988    | 0.617504        | 0          | 1         | 1         |
| Ly6c1         | 1.64662     | 2.38418         | 0          | 1         | 1         |
| Ly6h_j2       | 0.5105      | 0.4979          | -0.0360551 | 0.96239   | 0.989501  |
| Top1mt_j2     | 0.155231    | 0.0789143       | -0.976055  | 0.0628672 | 0.296948  |
| Top1mt_j3     | 0.085659    | 0.0792375       | -0.112422  | 0.844209  | 1         |

|                  |           |                 |             |           |          |
|------------------|-----------|-----------------|-------------|-----------|----------|
| Naprt1_j10       | 0.141106  | 0.0822283       | -0.77907    | 0.476274  | 0.772016 |
| Tsta3_j1         | 5.11321   | 6.2178          | 0.282175    | 0.345141  | 0.684606 |
| 2410075B13Rik    | 1.1141    | 0.993275        | -0.165612   | 0.578662  | 0.830487 |
| Scrib_j13        | 0.590129  | 0.914105        | 0           | 1         | 1        |
| Puf60_j5         | 0.518231  | 0.626833        | 0           | 1         | 1        |
| Puf60_j4         | 0.280186  | 0.234977        | 0           | 1         | 1        |
| Nrbp2_j8         | 1.60063   | 1.62963         | 0           | 1         | 1        |
| Sharpin_j2       | 10.4953   | 9.93221         | 0           | 1         | 1        |
| Dgat1            | 1.78351   | 1.67483         | -0.0907012  | 0.546395  | 0.81297  |
| Fbxl6            | 4.47993   | 5.19469         | 0.213563    | 0.18131   | 0.521211 |
| Cpsf1            | 0.491323  | 0.449784        | 0           | 1         | 1        |
| Vps28_j1         | 2.67174   | 3.67721         | 0.460834    | 0.206928  | 0.551484 |
| Cyhr1            | 19.7314   | 19.6442         | -0.00638904 | 0.956758  | 0.987617 |
| Cyhr1_j2         | 13.2309   | 11.6266         | -0.186483   | 0.208056  | 0.55225  |
| C030006K11Rik    | 2.95024   | 2.48254         | -0.249015   | 0.289599  | 0.637033 |
| Arhgap39_j9      | 8.10679   | 9.25846         | 0.191642    | 0.194456  | 0.536757 |
| Arhgap39_j10     | 1.33338   | 1.33568         | 0.00249075  | 0.991532  | 0.99753  |
| Arhgap39_j11     | 9.70859   | 8.31714         | -0.223174   | 0.049419  | 0.256485 |
| Zfp251           | 0.464315  | 0.455525        | 0           | 1         | 1        |
| Apol9a           | 0.287713  | 0.361755        | 0.330383    | 0.554998  | 0.817944 |
| Txn2_j1          | 35.3643   | 36.8759         | 0           | 1         | 1        |
| Pvalb_j1         | 21.3591   | 7.17267         | -1.57427    | 0         | 0        |
| Pvalb_j5         | 1.41851   | 1.12901         | -0.329316   | 0.526598  | 0.801166 |
| Tmprss6_j1       | 0.124636  | 0.167016        | 0.422265    | 0.632105  | 0.856974 |
| Tmprss6_j6       | 0.0771789 | 0.011367        | -2.76335    | 0.629954  | 1        |
| AK085438         | 0.143916  | 0.283212        | 0.976661    | 0.449024  | 0.755281 |
| Card10           | 1.29507   | 1.06367         | 0           | 1         | 1        |
| Lgals2_j1        | 0.880383  | 1.03426         | 0.232401    | 0.470494  | 0.768322 |
| Sox10_j6         | 0.697466  | 1.26891         | 0           | 1         | 1        |
| Pla2g6_j1        | 0.48474   | 0.599762        | 0           | 1         | 1        |
| Pla2g6_j2        | 1.71366   | 0.972105        | 0           | 1         | 1        |
| Csnk1e_j1        | 1.05115   | 0.885148        | 0           | 1         | 1        |
| Ddx17_j1         | 25.236    | 26.7777         | 0           | 1         | 1        |
| Ddx17_j2         | 7.11839   | 8.74909         | 0           | 1         | 1        |
| Ddx17            | 22.9705   | 24.3957         | 0           | 1         | 1        |
| 4933432B09Rik_j6 | 0.0442874 | 0.211193        | 2.25359     | 0.0131304 | 0.104753 |
| 4933432B09Rik_j8 | 0.037221  | 0.0714644       | 0.941108    | 0.435649  | 1        |
| 4933432B09Rik_j7 | 0.0606469 | 0.172507        | 1.50815     | 0.0705166 | 0.319172 |
| Sun2             | 0.293824  | 0.323263        | 0           | 1         | 1        |
| Dnalc4_j1        | 1.43067   | 1.67258         | 0           | 1         | 1        |
| Npcd             | 0.729803  | 0.574542        | 0           | 1         | 1        |
| Cbx7_j3          | 3.06524   | 2.99547         | 0           | 1         | 1        |
| Cbx7_j2          | 0         | 0.100548        | 0           | 1         | 1        |
| Pdgfb_j4         | 0.955147  | 0 -1.79769e+308 |             | 9.82E-14  | 1.62E-11 |
| Rpl3_j3          | 4.34244   | 4.28375         | 0           | 1         | 1        |
| Rpl3_j4          | 72.6911   | 74.9736         | 0           | 1         | 1        |
| Rps19bp1_j1      | 2.65248   | 2.14859         | -0.303951   | 0.442096  | 0.750452 |

|                  |            |            |              |           |           |
|------------------|------------|------------|--------------|-----------|-----------|
| St13             | 47.748     | 43.7931    | 0            | 1         | 1         |
| Rangap1_j2       | 31.5368    | 35.606     | 0            | 1         | 1         |
| Rangap1          | 0.639335   | 1.23745    | 0            | 1         | 1         |
| Tob2             | 4.02308    | 4.10131    | 0.0277826    | 0.828295  | 0.944579  |
| Naga_j4          | 1.84004    | 1.96878    | 0.0975635    | 0.700107  | 0.8896    |
| Tcf20_j1         | 3.84481    | 1.82729    | 0            | 1         | 1         |
| Tcf20_j2         | 4.03728    | 4.31146    | 0            | 1         | 1         |
| Rrp7a_j1         | 6.01355    | 6.26205    | 0            | 1         | 1         |
| Poldip3          | 2.06227    | 1.3725     | -0.587426    | 0.019004  | 0.136135  |
| Cyb5r3_j6        | 2.04609    | 4.81415    | 0            | 1         | 1         |
| Arfgap3_j2       | 0.375182   | 0.897693   | 1.25863      | 0.0049843 | 0.0506106 |
| 1700001L05Rik_j1 | 0.00216904 | 0.147139   | 0            | 1         | 1         |
| Pacsin2_j5       | 1.76       | 0.871263   | 0            | 1         | 1         |
| Pacsin2          | 13.9743    | 5.08025    | 0            | 1         | 1         |
| Mcat_j1          | 2.64172    | 4.40508    | 0            | 1         | 1         |
| Ttll12_j1        | 5.99558    | 5.74589    | -0.06137     | 0.64302   | 0.862213  |
| Ttll12_j2        | 0.149009   | 0.275841   | 0.888439     | 0.148645  | 0.477528  |
| Efcab6_j5        | 0          | 0.0529499  | 1.79769e+308 | 0.173597  | 1         |
| Sult4a1_j2       | 289.312    | 291.201    | 0            | 1         | 1         |
| 1810041L15Rik_j1 | 1.4398     | 0.678568   | 0            | 1         | 1         |
| 2210021J22Rik    | 3.88265    | 4.10151    | 0            | 1         | 1         |
| Cerk_j4          | 3.3739     | 3.27207    | 0            | 1         | 1         |
| Brd1_j2          | 3.06038    | 6.16855    | 0            | 1         | 1         |
| Alg12_j2         | 0.402127   | 0.562368   | 0.483863     | 0.610335  | 0.846502  |
| Ttll8_j3         | 0.0578838  | 0.0336842  | -0.78109     | 0.662532  | 1         |
| Mlc1_j3          | 1.04415    | 0.688205   | 0            | 1         | 1         |
| Mapk11_j1        | 12.171     | 13.308     | 0            | 1         | 1         |
| Mapk11_j2        | 25.722     | 28.4973    | 0            | 1         | 1         |
| Plxnb2_j1        | 1.6651     | 0.714572   | 0            | 1         | 1         |
| Fam116b_j6       | 2.6872     | 2.59229    | 0            | 1         | 1         |
| Fam116b_j7       | 4.10752    | 3.5642     | 0            | 1         | 1         |
| Fam116b_j8       | 0.149385   | 0.0554035  | 0            | 1         | 1         |
| Lmf2             | 6.17802    | 6.24188    | 0            | 1         | 1         |
| Tymp_j2          | 0.224      | 0.00398089 | 0            | 1         | 1         |
| Odf3b_j2         | 0.054788   | 0.0438308  | -0.321915    | 0.819669  | 1         |
| Cpt1b_j14        | 0.0355455  | 0.0499717  | 0.491445     | 0.764818  | 1         |
| Chkb_j2          | 4.2631     | 4.57801    | 0            | 1         | 1         |
| Kif21a_j10       | 26.8922    | 27.5178    | 0            | 1         | 1         |
| Kif21a_j11       | 0.297162   | 0.137114   | 0            | 1         | 1         |
| Kif21a_j9        | 10.1171    | 13.4208    | 0            | 1         | 1         |
| Zcrb1_j3         | 3.09977    | 3.21428    | 0            | 1         | 1         |
| Prickle1_j2      | 0.895431   | 1.06281    | 0.247229     | 0.277457  | 0.62639   |
| Adamts20         | 0.320565   | 0.338883   | 0.0801706    | 0.857783  | 0.954916  |
| Twf1_j1          | 0.558438   | 0.3504     | -0.672395    | 0.0919752 | 0.37296   |
| AK163711_j3      | 0.10462    | 0.157562   | 0.590762     | 0.555104  | 0.818015  |
| Scaf11_j3        | 1.03593    | 1.67958    | 0.697168     | 0.0001341 | 0.0027368 |
| Slc38a1          | 1.36526    | 4.2164     | 0            | 1         | 1         |



|                   |           |                        |            |           |           |
|-------------------|-----------|------------------------|------------|-----------|-----------|
| Slc38a1           | 2.00531   | 2.13068                | 0          | 1         | 1         |
| Slc38a2_j2        | 1.99021   | 3.36976                | 0          | 1         | 1         |
| Rapgef3           | 0.416482  | 0.356346               | -0.224973  | 0.551158  | 0.815748  |
| Zfp641            | 0.230837  | 0.146828               | -0.652745  | 0.248986  | 0.596471  |
| 2310037I24Rik_j5  | 0.728098  | 0.949852               | 0.383569   | 0.170178  | 0.507195  |
| 2310037I24Rik_j7  | 0.0914013 | 0 -1.79769e+308        | 0.0174781  |           | 1         |
| 2310037I24Rik_j6  | 0.0806814 | 0.0708467              | -0.187535  | 0.883869  | 1         |
| Adcy6_j5          | 0.0549281 | 0.0201955              | -1.44351   | 0.529266  | 1         |
| Adcy6_j6          | 0.706948  | 0.43204                | -0.710439  | 0.029551  | 0.183907  |
| Adcy6             | 0.18993   | 0.208334               | 0.133428   | 0.784482  | 0.927523  |
| Mll2_j6           | 0.812188  | 1.06752                | 0.394377   | 0.014833  | 0.11397   |
| Mll2_j10          | 0.283941  | 2.83E-05               | -13.2904   | 0.970202  | 0.991582  |
| Rhebl1_j3         | 5.94476   | 5.91582                | 0          | 1         | 1         |
| Mcrs1_j5          | 0.570402  | 0.85818                | 0.589301   | 0.186982  | 0.527962  |
| Nckap5l_j4        | 5.15244   | 5.27174                | 0          | 1         | 1         |
| Faim2             | 7.83639   | 4.7713                 | -0.715807  | 7.57E-08  | 4.24E-06  |
| Racgap1_j2        | 0.113685  | 0.239705               | 1.07623    | 0.092012  | 0.373078  |
| Lass5_j1          | 0.172431  | 0.377089               | 0          | 1         | 1         |
| Lass5_j2          | 5.27941   | 4.84206                | 0          | 1         | 1         |
| Lima1_j2          | 0.113062  | 0.0378961              | 0          | 1         | 1         |
| Gm9763            | 9.74643   | 8.4894                 | -0.199211  | 0.457084  | 0.760257  |
| Slc11a2_j1        | 1.06027   | 0.48882                | 0          | 1         | 1         |
| Tcfcp2_j4         | 2.22886   | 2.42227                | 0          | 1         | 1         |
| Tcfcp2_j2         | 2.82325   | 2.18152                | 0          | 1         | 1         |
| Cela1             | 12.9917   | 15.8074                | 0.283014   | 0.0339413 | 0.201735  |
| Galnt6            | 0.818641  | 0.643782               | 0          | 1         | 1         |
| AK038079          | 0.0801564 | 0 -1.79769e+308        | 0.0597927  |           | 1         |
| AK039268_j1       | 0         | 0.0805343 1.79769e+308 | 0.105704   |           | 1         |
| AK039268          | 0.0795715 | 0.137015               | 0.784008   | 0.402915  | 1         |
| Krt1_j1           | 0.785799  | 0.843981               | 0.10305    | 0.820317  | 0.941821  |
| Spryd3_j4         | 0.0688846 | 0.0143342              | 0          | 1         | 1         |
| Csad_j4           | 0.0588451 | 0.0655772              | 0          | 1         | 1         |
| Rarg_j5           | 0.666061  | 0.943593               | 0          | 1         | 1         |
| Map3k12_j1        | 0.576467  | 0.380239               | 0          | 1         | 1         |
| Cbx5              | 1.27352   | 1.34508                | 0.0788641  | 0.64988   | 0.865521  |
| Zfp385a           | 7.44708   | 4.34483                | 0          | 1         | 1         |
| Itga5_j5          | 0.0296904 | 0.110643               | 0          | 1         | 1         |
| Itga5             | 0.228136  | 0.438253               | 0          | 1         | 1         |
| Ppp1r1a_j1        | 1.98738   | 1.80099                | -0.142077  | 0.668136  | 0.874424  |
| Heatr7b2_j1       | 0.136937  | 0.110709               | -0.306739  | 0.752016  | 1         |
| Rpl37_j4          | 11.2712   | 10.117                 | 0          | 1         | 1         |
| Fyb_j6            | 0.280414  | 0.667765               | 1.25178    | 0.0025962 | 0.0307386 |
| Rictor_j3         | 0.449784  | 0.1151                 | -1.96634   | 0.0003228 | 0.0056848 |
| 2410089E03Rik_j5  | 0.0715468 | 4.15E-05               | -10.7521   | 0.872106  | 1         |
| 2410089E03Rik_j8  | 0.102595  | 0.100789               | -0.0256226 | 0.961367  | 1         |
| 2410089E03Rik_j19 | 2.69614   | 4.09346                | 0.602426   | 0.0086568 | 0.0769773 |
| XLOC_010947       | 0.320126  | 0.254682               | -0.329941  | 0.350054  | 0.687648  |

|               |            |                 |             |           |           |
|---------------|------------|-----------------|-------------|-----------|-----------|
| Lmbrd2_j2     | 0.439174   | 0.370292        | 0           | 1         | 1         |
| Gm19276_j1    | 0.138738   | 0.107372        | -0.369745   | 0.573373  | 0.827542  |
| XLOC_010955   | 0.150855   | 0.167574        | 0.151642    | 0.833307  | 0.946329  |
| Adamts12_j1   | 0.0832748  | 0.0347655       | -1.26022    | 0.57063   | 1         |
| Zfr_j4        | 10.3892    | 12.8265         | 0           | 1         | 1         |
| Mtmr12_j1     | 0.0944483  | 0.000681871     | -7.11388    | 0.326349  | 1         |
| Mtmr12_j2     | 0.137549   | 0.200118        | 0.540905    | 0.266407  | 0.615515  |
| XLOC_010965   | 0.0614509  | 0.0118128       | -2.37909    | 0.221672  | 1         |
| Cdh18_j2      | 1.92738    | 1.16344         | -0.728246   | 0.0134717 | 0.10662   |
| Myo10_j2      | 0.184752   | 0.350675        | 0           | 1         | 1         |
| Myo10_j5      | 2.98663    | 5.04626         | 0           | 1         | 1         |
| Fam134b_j1    | 24.7333    | 20.6441         | 0           | 1         | 1         |
| March11_j2    | 0.603483   | 0.403086        | -0.582225   | 0.0622652 | 0.295391  |
| March11_j5    | 5.03512    | 4.70108         | -0.0990344  | 0.730585  | 0.904795  |
| XLOC_010973   | 0.138579   | 0.167515        | 0.273585    | 0.725514  | 0.902457  |
| Ank_j2        | 8.55885    | 9.92164         | 0           | 1         | 1         |
| XLOC_010978   | 0.223673   | 0.173225        | -0.368741   | 0.710675  | 0.894752  |
| Cmb1_j3       | 0.00454109 | 0.140192        | 4.94822     | 0.51021   | 1         |
| XLOC_010981   | 0.288398   | 0.247859        | -0.218541   | 0.665803  | 0.873346  |
| Mtdh_j1       | 0.0344927  | 0.0653477       | 0           | 1         | 1         |
| Laptn4b_j1    | 0.112321   | 0.752387        | 0           | 1         | 1         |
| Matn2_j3      | 3.43296    | 4.56757         | 0           | 1         | 1         |
| Osr2_j2       | 0.0637878  | 0.131674        | 1.04561     | 0.340951  | 1         |
| Vps13b        | 0.359967   | 0.266819        | -0.432005   | 0.1011    | 0.393646  |
| Spag1_j1      | 0.113635   | 0.109246        | -0.0568192  | 0.903935  | 1         |
| Dcaf13_j3     | 0.437156   | 0.30588         | 0           | 1         | 1         |
| Rims2_j7      | 0.524205   | 0.0690101       | -2.92525    | 5.42E-05  | 0.0012764 |
| XLOC_011007   | 0.123103   | 0.0572124       | -1.10546    | 0.496491  | 1         |
| Zfpm2_j1      | 0.0619995  | 0 -1.79769e+308 | 0.0015327   | 0.0015327 | 1         |
| Oxr1_j1       | 0.62404    | 1.71942         | 1.46221     | 2.35E-06  | 8.76E-05  |
| Ttc35_j1      | 27.5868    | 27.7276         | 0.00734596  | 0.951977  | 0.986165  |
| XLOC_011022   | 0.0706812  | 0.0578592       | -0.288781   | 0.833589  | 1         |
| Wdr67_j2      | 0.00380025 | 0.180879        | 5.57279     | 0.0367154 | 0.211904  |
| Wdr67_j5      | 0.14722    | 0 -1.79769e+308 | 0.0001068   | 0.0001068 | 0.0022791 |
| D15Ert621e_j3 | 8.56315    | 9.14553         | 0           | 1         | 1         |
| Trib1_j1      | 2.49676    | 2.84777         | 0.18978     | 0.314053  | 0.658298  |
| Pvt1_j3       | 0.140111   | 0.125373        | -0.160335   | 0.79535   | 0.931782  |
| Pvt1_j2       | 0.363724   | 0.000113415     | -11.647     | 0.785227  | 0.927978  |
| Pvt1_j1       | 0.119153   | 0 -1.79769e+308 | 0.0001289   | 0.0001289 | 1         |
| XLOC_011047   | 11.8848    | 11.8444         | -0.00491909 | 0.977786  | 0.993579  |
| Efr3a_j2      | 1.26624    | 0.820775        | 0           | 1         | 1         |
| XLOC_011050   | 9.51912    | 11.3133         | 0           | 1         | 1         |
| Phf20l1_j8    | 0.415424   | 0.295394        | 0           | 1         | 1         |
| Phf20l1_j9    | 0.0289997  | 0.0498146       | 0           | 1         | 1         |
| Khdrbs3_j4    | 16.0896    | 18.9004         | 0           | 1         | 1         |
| XLOC_011059   | 0.159769   | 0.171097        | 0.0988203   | 0.91779   | 0.9744    |
| mKIAA0870_j5  | 0.111302   | 0 -1.79769e+308 | 0.0180724   | 0.0180724 | 1         |

|                  |           |                 |            |           |           |
|------------------|-----------|-----------------|------------|-----------|-----------|
| mKIAA0870_j10    | 0.316755  | 0.218412        | -0.536314  | 0.40508   | 0.726949  |
| Bai1_j2          | 0.79304   | 0.293367        | -1.43469   | 8.92E-05  | 0.0019463 |
| Ly6e             | 0         | 0.526374        | 0          | 1         | 1         |
| Ly6e_j3          | 0.151293  | 0.106449        | 0          | 1         | 1         |
| Ly6e_j4          | 10.2655   | 16.9104         | 0          | 1         | 1         |
| Gsdmd_j1         | 0.203187  | 0.149854        | -0.439251  | 0.547605  | 0.813768  |
| AK158547         | 0.361448  | 0.425432        | 0.235138   | 0.39815   | 0.722336  |
| Grina_j3         | 2.32561   | 2.43478         | 0.0661869  | 0.830661  | 0.945436  |
| XLOC_011089      | 0.104603  | 0.0389161       | -1.42649   | 0.484794  | 1         |
| XLOC_011089      | 0.0864854 | 0.0905659       | 0.0665105  | 0.952381  | 1         |
| XLOC_011089      | 0.17752   | 0.0089714       | -4.30651   | 0.136285  | 0.459302  |
| Brp16_j2         | 4.02E-05  | 0.200994        | 12.287     | 0.963797  | 0.989793  |
| Scx              | 1.74088   | 1.33576         | -0.382149  | 0.0342962 | 0.202965  |
| Hsf1_j3          | 2.11103   | 2.27068         | 0.105174   | 0.357124  | 0.693052  |
| Hsf1_j2          | 0.164856  | 0.142893        | -0.206272  | 0.453056  | 0.757983  |
| Kifc2_j7         | 0.275228  | 0.00168025      | 0          | 1         | 1         |
| Ppp1r16a_j13     | 0.4667    | 0.472183        | 0.0168517  | 0.953862  | 0.98656   |
| Ppp1r16a_j14     | 3.05263   | 2.57491         | -0.245531  | 0.332805  | 0.673923  |
| Mfsd3            | 4.05229   | 4.11147         | 0.0209179  | 0.902286  | 0.968814  |
| Rpl8_j1          | 0.547296  | 0.39129         | 0          | 1         | 1         |
| Rpl8_j3          | 117.189   | 143.594         | 0          | 1         | 1         |
| 1110038F14Rik_j2 | 2.69003   | 3.96832         | 0.560908   | 0.0350385 | 0.205809  |
| XLOC_011105      | 0.160661  | 0.0557071       | -1.52809   | 0.196504  | 0.53931   |
| XLOC_011106      | 0.218639  | 0.208038        | -0.0717043 | 0.882584  | 0.962648  |
| Ncf4             | 0.183812  | 0.453986        | 1.30441    | 0.0145493 | 0.112446  |
| Ncf4_j3          | 0.266289  | 0.358762        | 0.43003    | 0.688471  | 0.884206  |
| Csf2rb_j4        | 0.435725  | 0 -1.79769e+308 |            | 1.01E-17  | 2.70E-15  |
| Gga1_j1          | 5.52651   | 5.8983          | 0.0939312  | 0.588128  | 0.835359  |
| Lgals1_j3        | 14.8077   | 25.0403         | 0.757903   | 0.0005076 | 0.0082426 |
| XLOC_011121      | 0.133258  | 0.0745662       | -0.837626  | 0.415237  | 1         |
| Eif3l_j3         | 34.2827   | 34.5194         | 0.0099255  | 0.921904  | 0.975553  |
| Gm10863_j2       | 0.141793  | 0.188824        | 0.413255   | 0.351971  | 0.689134  |
| Gm10863_j4       | 0.185349  | 0.536466        | 1.53324    | 6.61E-06  | 0.0002166 |
| Pick1_j3         | 1.01086   | 0.888387        | -0.186323  | 0.663813  | 0.872653  |
| Maff_j2          | 0.38818   | 0.349691        | 0          | 1         | 1         |
| Kdelr3           | 3.54846   | 3.9714          | 0          | 1         | 1         |
| Cby1_j3          | 9.37685   | 9.45026         | 0.0112497  | 0.932423  | 0.979529  |
| Apobec3_j2       | 0.291146  | 0.200723        | 0          | 1         | 1         |
| XLOC_011140      | 0.219805  | 0.214514        | -0.0351511 | 0.946933  | 0.98431   |
| Tab1_j2          | 0.638167  | 1.28882         | 1.01404    | 0.0020591 | 0.0255766 |
| Smcr7l           | 0.945746  | 0.307674        | 0          | 1         | 1         |
| Smcr7l_j1        | 0.441944  | 0.385094        | 0          | 1         | 1         |
| Atf4_j1          | 29.3339   | 42.6909         | 0          | 1         | 1         |
| Cacna1i_j7       | 0.604172  | 0.154538        | -1.967     | 9.56E-07  | 3.98E-05  |
| XLOC_011148      | 0.108117  | 0.125894        | 0.219606   | 0.734395  | 1         |
| Tnrc6b_j2        | 0.527137  | 0.217781        | -1.2753    | 0.0002793 | 0.0050423 |
| Tnrc6b_j3        | 0.0587447 | 0.0298172       | -0.978312  | 0.32867   | 1         |

|             |           |                 |            |           |           |
|-------------|-----------|-----------------|------------|-----------|-----------|
| Ep300_j3    | 3.07525   | 3.44766         | 0          | 1         | 1         |
| Tef_j1      | 3.32923   | 3.68408         | 0.146114   | 0.654424  | 0.867888  |
| Aco2_j2     | 0.0711629 | 0.0513888       | -0.469673  | 0.727648  | 1         |
| Csdc2_j1    | 0.675107  | 1.61015         | 1.254      | 1.39E-05  | 0.0004098 |
| Srebf2_j2   | 17.3782   | 19.8659         | 0          | 1         | 1         |
| Pnpla3_j1   | 6.2716    | 5.35233         | -0.228666  | 0.0469755 | 0.24858   |
| Parvb_j2    | 0.230068  | 0.129606        | 0          | 1         | 1         |
| Parvg_j3    | 0.170882  | 0 -1.79769e+308 |            | 0.0001817 | 0.0035424 |
| Atxn10_j2   | 3.13809   | 5.70414         | 0          | 1         | 1         |
| XLOC_011191 | 0.244224  | 0.225423        | -0.11557   | 0.714727  | 0.896683  |
| Ppara_j1    | 0.141027  | 0.0603744       | -1.22397   | 0.24945   | 0.596861  |
| Trmu_j4     | 0.138594  | 0.0610759       | -1.18219   | 0.148367  | 0.477277  |
| Gramd4_j3   | 7.55154   | 6.91326         | 0          | 1         | 1         |
| Tbc1d22a_j3 | 2.85023   | 2.86692         | 0.00842214 | 0.966932  | 0.990574  |
| Tbc1d22a_j6 | 0.0710596 | 0 -1.79769e+308 |            | 0.02706   | 1         |
| Trabd       | 8.98634   | 9.84986         | 0.13237    | 0.276184  | 0.624943  |
| Ppp6r2      | 8.15348   | 7.37894         | 0          | 1         | 1         |
| Ncaph2_j3   | 0.999509  | 1.42346         | 0          | 1         | 1         |
| Mapk8ip2_j1 | 1.9528    | 1.87478         | 0          | 1         | 1         |
| Shank3_j1   | 0.147614  | 0.074972        | -0.977401  | 0.198497  | 0.541655  |
| Cntn1       | 48.7893   | 36.3715         | 0          | 1         | 1         |
| AK035742_j1 | 0.140662  | 0 -1.79769e+308 |            | 0.0075513 | 0.0697435 |
| Pphln1_j1   | 0.0835881 | 0.0247752       | 0          | 1         | 1         |
| Pphln1_j2   | 0.228515  | 0.0697064       | 0          | 1         | 1         |
| Tmem117_j1  | 5.71079   | 5.73616         | 0          | 1         | 1         |
| Ano6_j2     | 12.6886   | 17.0694         | 0          | 1         | 1         |
| Gm4371_j4   | 0.37332   | 0 -1.79769e+308 |            | 6.46E-06  | 0.0002119 |
| Pfkm_j2     | 1.16024   | 2.48084         | 0          | 1         | 1         |
| Cacnb3      | 30.4312   | 28.5362         | 0          | 1         | 1         |
| Ccdc65_j3   | 0.351958  | 0.156885        | -1.1657    | 0.0775869 | 0.337104  |
| Ccdc65_j2   | 0.0658347 | 0 -1.79769e+308 |            | 0.0183575 | 1         |
| XLOC_011249 | 0.41228   | 0.32259         | -0.353921  | 0.59234   | 0.837831  |
| XLOC_011252 | 0.339564  | 0.335338        | -0.0180655 | 0.946896  | 0.984306  |
| Prph_j5     | 577.693   | 744.428         | 0          | 1         | 1         |
| Spats2_j2   | 0.0718399 | 0               | 0          | 1         | 1         |
| Kcnh3       | 0.143645  | 0.0857152       | -0.744882  | 0.266773  | 0.615745  |
| Tmbim6_j2   | 3.75902   | 22.7574         | 0          | 1         | 1         |
| XLOC_011260 | 0.152988  | 0.0861617       | -0.828303  | 0.212562  | 0.557606  |
| XLOC_011260 | 0.141727  | 0.0306767       | -2.20791   | 0.0823677 | 0.349625  |
| Smarcd1_j2  | 4.0476    | 3.67417         | -0.139648  | 0.265236  | 0.614072  |
| Gpd1_j1     | 3.26538   | 3.12696         | 0          | 1         | 1         |
| Atf1_j1     | 0.289222  | 0 -1.79769e+308 |            | 0.118043  | 0.427653  |
| Dazap2_j5   | 19.6303   | 28.8673         | 0          | 1         | 1         |
| Slc4a8_j1   | 0.234158  | 0.0454989       | 0          | 1         | 1         |
| XLOC_011277 | 0.243287  | 0.106579        | -1.19073   | 0.201307  | 0.544759  |
| Nr4a1_j1    | 0.738992  | 0.1354          | 0          | 1         | 1         |
| Nr4a1_j3    | 0.17171   | 0.562044        | 0          | 1         | 1         |

|             |             |                 |            |           |          |
|-------------|-------------|-----------------|------------|-----------|----------|
| AK138921_j1 | 0.19279     | 0.206417        | 0.0985289  | 0.829572  | 0.944941 |
| Tenc1_j5    | 0.254715    | 0.194182        | 0          | 1         | 1        |
| Tenc1_j8    | 0.417294    | 0.572911        | 0          | 1         | 1        |
| Zfp740_j1   | 0.173273    | 0.172535        | 0          | 1         | 1        |
| Zfp740_j7   | 1.1157      | 0.872105        | 0          | 1         | 1        |
| Myg1_j3     | 6.30597     | 4.99625         | -0.335874  | 0.147857  | 0.476517 |
| Pcbp2_j1    | 0.112173    | 0 -1.79769e+308 |            | 8.60E-05  | 1        |
| AK043982_j1 | 0.111795    | 0.108065        | -0.0489539 | 0.936956  | 1        |
| Hoxc9_j2    | 0.634128    | 0.367908        | 0          | 1         | 1        |
| Nckap1l     | 0.548037    | 1.16726         | 1.09078    | 7.06E-08  | 4.00E-06 |
| Pde1b       | 0.912149    | 0.731016        | -0.319367  | 0.0544714 | 0.27224  |
| Ghr_j1      | 0.978673    | 1.31221         | 0          | 1         | 1        |
| Fbxo4_j2    | 1.73696     | 2.29246         | 0.400329   | 0.167851  | 0.50444  |
| Fbxo4       | 0.851821    | 0.948859        | 0.155643   | 0.491964  | 0.780786 |
| AW549877_j2 | 0.998038    | 0               | 0          | 1         | 1        |
| Card6_j1    | 0.123294    | 0.175039        | 0          | 1         | 1        |
| Osmr_j6     | 0.234345    | 0.331938        | 0          | 1         | 1        |
| Osmr_j7     | 0.882281    | 1.87972         | 0          | 1         | 1        |
| Egflam_j3   | 0.653388    | 0.254888        | 0          | 1         | 1        |
| Wdr70_j2    | 1.84425     | 2.7947          | 0          | 1         | 1        |
| Wdr70_j3    | 2.48648     | 2.3376          | 0          | 1         | 1        |
| Nipbl_j1    | 0.0721115   | 0.0418555       | -0.784813  | 0.195541  | 1        |
| Skp2_j1     | 0.144203    | 0.150367        | 0.0603924  | 0.940355  | 0.981884 |
| Skp2_j2     | 0.285901    | 0 -1.79769e+308 |            | 7.45E-08  | 4.18E-06 |
| Skp2        | 0.296645    | 0.102853        | -1.52816   | 0.278925  | 0.627636 |
| Spef2_j1    | 0.125472    | 0.0437828       | -1.51893   | 0.173484  | 1        |
| XLOC_011329 | 0.0907704   | 0 -1.79769e+308 |            | 0.0113013 | 1        |
| XLOC_011329 | 0.0950168   | 0.132946        | 0.484588   | 0.61553   | 1        |
| Pdzd2_j2    | 0.166542    | 0.104612        | 0          | 1         | 1        |
| Cdh6_j3     | 0.111716    | 0               | 0          | 1         | 1        |
| XLOC_011342 | 0.159502    | 0.0461756       | -1.78837   | 0.125092  | 0.440565 |
| Fam105b_j4  | 0.000425578 | 0.353736        | 9.69903    | 0.790285  | 0.930148 |
| Trio_j3     | 0.431786    | 0.510507        | 0          | 1         | 1        |
| Trio_j11    | 2.57052     | 1.31989         | 0          | 1         | 1        |
| Trio_j12    | 0.0922321   | 0               | 0          | 1         | 1        |
| March6_j3   | 0.624951    | 0.396112        | 0          | 1         | 1        |
| Stk3_j1     | 2.59547     | 2.65817         | 0          | 1         | 1        |
| Stk3        | 0.437794    | 0.780084        | 0          | 1         | 1        |
| Rnf19a_j2   | 2.743       | 4.36378         | 0          | 1         | 1        |
| Pabpc1_j1   | 6.47846     | 8.04167         | 0          | 1         | 1        |
| Ywhaz_j2    | 1.57682     | 1.43841         | -0.132543  | 0.511046  | 0.791357 |
| Zfp706_j3   | 9.7183      | 9.58558         | 0          | 1         | 1        |
| Ncald_j2    | 6.5127      | 3.21294         | 0          | 1         | 1        |
| Ncald_j3    | 5.36663     | 2.41802         | 0          | 1         | 1        |
| Rrm2b_j1    | 9.1016      | 7.48225         | 0          | 1         | 1        |
| Ubr5_j4     | 7.585       | 8.82015         | 0          | 1         | 1        |
| XLOC_011373 | 0.107627    | 0 -1.79769e+308 |            | 0.0489934 | 1        |

|             |           |                 |           |           |           |
|-------------|-----------|-----------------|-----------|-----------|-----------|
| Klf10_j3    | 0.475876  | 1.11444         | 0         | 1         | 1         |
| XLOC_011375 | 0.156132  | 0.0579097       | -1.43089  | 0.366143  | 0.70002   |
| XLOC_011383 | 0.107119  | 0 -1.79769e+308 |           | 0.0220642 | 1         |
| Angpt1_j1   | 0.399674  | 0.0489486       | -3.02948  | 0.0024755 | 0.0296163 |
| Angpt1      | 0.627733  | 0.32639         | -0.943557 | 0.0033435 | 0.0375262 |
| Rspo2_j7    | 1.66245   | 1.53277         | 0         | 1         | 1         |
| Rspo2_j6    | 2.11409   | 2.77879         | 0         | 1         | 1         |
| Rspo2_j5    | 3.20684   | 3.0683          | 0         | 1         | 1         |
| Eif3e_j4    | 1.21024   | 0 -1.79769e+308 |           | 1.52E-11  | 1.78E-09  |
| Sybu_j2     | 0.519439  | 0               | 0         | 1         | 1         |
| Sybu_j3     | 1.18798   | 1.66632         | 0         | 1         | 1         |
| Sybu        | 3.18827   | 0               | 0         | 1         | 1         |
| XLOC_011392 | 0.189844  | 0.00733379      | -4.69411  | 0.0398927 | 0.223411  |
| Kcnv1_j1    | 0.878075  | 0.00148506      | 0         | 1         | 1         |
| Kcnv1_j2    | 1.71907   | 1.62678         | 0         | 1         | 1         |
| Csmd3_j3    | 0.184277  | 0.127605        | -0.530197 | 0.253933  | 0.602136  |
| Csmd3_j9    | 0.173823  | 0.124955        | -0.476211 | 0.580505  | 0.831592  |
| Csmd3_j10   | 0.135569  | 0 -1.79769e+308 |           | 0.0139492 | 1         |
| Trps1_j1    | 0.10602   | 0.0341775       | -1.63322  | 0.207795  | 1         |
| Trps1_j2    | 0.0526726 | 0 -1.79769e+308 |           | 0.0180031 | 1         |
| Trps1_j3    | 0.0664461 | 0 -1.79769e+308 |           | 0.0079332 | 1         |
| Samd12_j3   | 0.385724  | 0.0663987       | 0         | 1         | 1         |
| Enpp2       | 0.991703  | 0.364059        | -1.44574  | 0.0002612 | 0.0047803 |
| Taf2_j3     | 2.1229    | 2.63389         | 0.311159  | 0.129191  | 0.44794   |
| Dscc1_j2    | 0.109298  | 0 -1.79769e+308 |           | 0.0612182 | 1         |
| Mrpl13_j1   | 5.04859   | 7.53892         | 0         | 1         | 1         |
| Sntb1_j1    | 8.37326   | 4.6148          | 0         | 1         | 1         |
| XLOC_011409 | 0.118142  | 0.122637        | 0.0538767 | 0.936294  | 1         |
| Zhx1_j1     | 8.48339   | 7.87023         | 0         | 1         | 1         |
| Atad2_j1    | 0.384948  | 0.239277        | 0         | 1         | 1         |
| Fbxo32_j1   | 0.359898  | 0.153848        | -1.22608  | 0.0042183 | 0.0445502 |
| Tmem65_j3   | 22.2341   | 17.6635         | 0         | 1         | 1         |
| Fam84b_j1   | 0.204981  | 0.158343        | -0.372444 | 0.423313  | 0.738697  |
| Fam84b      | 0.118113  | 0.0988475       | -0.256896 | 0.653745  | 1         |
| Fam49b_j6   | 5.03813   | 5.62651         | 0         | 1         | 1         |
| Fam49b_j7   | 11.1625   | 9.06312         | 0         | 1         | 1         |
| Asap1_j1    | 0.460709  | 0.544522        | 0         | 1         | 1         |
| Asap1_j9    | 2.78227   | 1.55223         | 0         | 1         | 1         |
| Asap1_j12   | 0.484567  | 0.0903226       | 0         | 1         | 1         |
| XLOC_011430 | 0.0821278 | 0.0886356       | 0.110016  | 0.930752  | 1         |
| Ndrg1_j3    | 12.5082   | 10.4508         | 0         | 1         | 1         |
| Zfat_j4     | 0.126365  | 0 -1.79769e+308 |           | 3.97E-05  | 1         |
| XLOC_011435 | 0.177996  | 0.132274        | -0.428312 | 0.620971  | 0.851431  |
| Col22a1_j1  | 0.217023  | 0.00321836      | -6.07537  | 0.408575  | 0.728884  |
| Kcnk9_j1    | 0.209281  | 0.120573        | -0.795541 | 0.103602  | 0.399115  |
| Trappc9_j2  | 36.0004   | 31.9455         | 0         | 1         | 1         |
| Eif2c2      | 0.522813  | 0.683636        | 0.386935  | 0.0540968 | 0.27108   |

|                  |             |                 |            |           |          |
|------------------|-------------|-----------------|------------|-----------|----------|
| Ptk2_j8          | 0.16397     | 0.069069        | 0          | 1         | 1        |
| Ptk2_j10         | 0.718688    | 0.568942        | 0          | 1         | 1        |
| Ly6a             | 3.34706     | 3.34322         | 0          | 1         | 1        |
| Ly6c1_j2         | 6.83218     | 4.3971          | 0          | 1         | 1        |
| Ly6c1_j3         | 3.27143     | 4.83386         | 0          | 1         | 1        |
| Ly6h_j1          | 0.208531    | 0 -1.79769e+308 | 0.0329768  | 0.197894  |          |
| Top1mt_j1        | 3.72999     | 4.00968         | 0.104316   | 0.565416  | 0.823805 |
| Naprt1_j2        | 0.0316386   | 0.105558        | 1.73827    | 0.052262  | 1        |
| Naprt1_j3        | 0.508757    | 0.526748        | 0.0501383  | 0.868609  | 0.958331 |
| Pycrl_j3         | 0.474526    | 0.0369087       | -3.68445   | 0.0406741 | 0.226309 |
| Scrib_j6         | 1.30071     | 1.05322         | 0          | 1         | 1        |
| Scrib_j8         | 0.356379    | 0.524046        | 0          | 1         | 1        |
| Scrib_j7         | 0.194643    | 0.196953        | 0          | 1         | 1        |
| Scrib_j9         | 0.0924725   | 0.17017         | 0          | 1         | 1        |
| Puf60            | 0.0904064   | 0.181128        | 0          | 1         | 1        |
| Nrbp2_j6         | 0.278906    | 0.314581        | 0          | 1         | 1        |
| Nrbp2_j7         | 0.689967    | 0.54378         | 0          | 1         | 1        |
| Plec_j4          | 0.445269    | 0.386984        | -0.202401  | 0.330873  | 0.672637 |
| Sharpin_j1       | 8.30893     | 7.52162         | 0          | 1         | 1        |
| Bop1_j2          | 3.71355     | 4.41491         | 0          | 1         | 1        |
| Dgat1_j1         | 0.621759    | 0.700415        | 0.171855   | 0.322245  | 0.665214 |
| Dgat1_j3         | 1.61195     | 0.846521        | -0.929186  | 1.46E-07  | 7.50E-06 |
| Cpsf1_j3         | 0.137441    | 0.184874        | 0          | 1         | 1        |
| Cpsf1_j4         | 0.435475    | 0.435           | 0          | 1         | 1        |
| Vps28_j7         | 5.38768     | 6.52577         | 0.276485   | 0.2095    | 0.553795 |
| Vps28_j6         | 1.02848     | 1.75772         | 0.773195   | 0.072662  | 0.324334 |
| Vps28_j5         | 0.290608    | 0.0543226       | -2.41945   | 0.14537   | 0.473254 |
| Recql4_j5        | 0.526716    | 0.494911        | -0.0898549 | 0.808927  | 0.937258 |
| Recql4_j6        | 0.742393    | 0.707001        | -0.0704707 | 0.69248   | 0.886124 |
| Zfp251_j2        | 2.31066     | 2.87965         | 0          | 1         | 1        |
| Rbfox2           | 3.17693     | 2.05525         | 0          | 1         | 1        |
| Apol8_j2         | 0.1554      | 0.181226        | 0.221804   | 0.724423  | 0.901947 |
| Myh9_j3          | 6.10148     | 5.41137         | 0          | 1         | 1        |
| Myh9_j6          | 0.808431    | 0.077921        | 0          | 1         | 1        |
| Foxred2_j1       | 0.159751    | 0.0662813       | -1.26915   | 0.178663  | 0.518187 |
| Foxred2_j3       | 0.177594    | 0 -1.79769e+308 | 3.71E-07   | 1.71E-05  |          |
| XLOC_011494      | 0.104932    | 0.0507073       | -1.04919   | 0.407333  | 1        |
| Pvalb            | 10.6509     | 2.92231         | -1.86579   | 2.89E-15  | 5.91E-13 |
| 1700088E04Rik_j2 | 0.378807    | 0.445763        | 0          | 1         | 1        |
| Sox10_j1         | 7.75838     | 7.88822         | 0          | 1         | 1        |
| Sox10_j2         | 12.2675     | 12.452          | 0          | 1         | 1        |
| Pla2g6_j4        | 0.000679781 | 1.32879         | 0          | 1         | 1        |
| Pla2g6_j5        | 0.966635    | 1.58852         | 0          | 1         | 1        |
| Tmem184b_j2      | 8.96709     | 10.951          | 0          | 1         | 1        |
| Ddx17_j6         | 7.6551      | 5.65579         | 0          | 1         | 1        |
| Ddx17_j5         | 0.360184    | 0.54749         | 0          | 1         | 1        |
| Dmc1_j2          | 0.146529    | 0.249336        | 0.766907   | 0.193344  | 0.535696 |

|                  |           |                 |           |           |           |
|------------------|-----------|-----------------|-----------|-----------|-----------|
| 4933432B09Rik_j2 | 0.0905545 | 0.0762553       | -0.247949 | 0.798995  | 1         |
| 4933432B09Rik_j9 | 0.28273   | 0.180132        | -0.650372 | 0.481079  | 0.774779  |
| Npcd_j2          | 0.560353  | 0.161495        | 0         | 1         | 1         |
| Cbx7_j5          | 0.624721  | 0.310477        | 0         | 1         | 1         |
| Cbx7             | 1.759     | 1.06632         | 0         | 1         | 1         |
| Pdgfb_j5         | 1.40606   | 1.8724          | 0.41323   | 0.116488  | 0.424494  |
| XLOC_011528      | 0.371041  | 0.0805427       | -2.20375  | 0.495255  | 0.782763  |
| Mkl1_j1          | 0.435896  | 0.432682        | -0.010678 | 0.964558  | 0.989999  |
| St13_j1          | 15.5002   | 13.0291         | 0         | 1         | 1         |
| AK045688         | 0.193643  | 0.10056         | -0.945353 | 0.269927  | 0.619064  |
| Tob2_j3          | 0.0559881 | 0.184004        | 1.71654   | 0.010016  | 0.0856717 |
| Polr3h_j1        | 0.0762192 | 0.0196838       | -1.95314  | 0.0549665 | 1         |
| Nhp2l1           | 13.4039   | 12.3242         | 0         | 1         | 1         |
| Cenpm_j1         | 0.592667  | 0.390285        | -0.602693 | 0.296378  | 0.643089  |
| Cyp2d22_j4       | 0.472288  | 0.557852        | 0.240214  | 0.5986    | 0.840853  |
| Nfam1            | 0.235141  | 0.334916        | 0.510274  | 0.250123  | 0.597712  |
| Cyb5r3_j1        | 23.7221   | 33.6457         | 0         | 1         | 1         |
| Cyb5r3           | 4.88172   | 2.7289          | 0         | 1         | 1         |
| Arfgap3_j3       | 6.14115   | 6.98088         | 0.184899  | 0.199617  | 0.542596  |
| 1700001L05Rik_j4 | 1.44655   | 0.874469        | 0         | 1         | 1         |
| Mcat_j3          | 0.471302  | 0.107744        | 0         | 1         | 1         |
| Ttll12_j3        | 2.01237   | 1.37798         | -0.546343 | 0.0828128 | 0.350783  |
| Efcab6_j3        | 0.2382    | 0.414914        | 0.800641  | 0.161242  | 0.496147  |
| Sult4a1_j1       | 2.31477   | 4.1282          | 0         | 1         | 1         |
| 1810041L15Rik    | 1.43948   | 0.798806        | 0         | 1         | 1         |
| Phf21b           | 0.0270595 | 0.294478        | 3.44395   | 0.0005441 | 0.0087585 |
| Phf21b           | 0.123867  | 0.111797        | -0.147907 | 0.835379  | 1         |
| Cerk_j1          | 0.246909  | 0.397072        | 0         | 1         | 1         |
| Brd1             | 3.18536   | 3.96986         | 0         | 1         | 1         |
| Mlc1_j1          | 2.81448   | 2.9693          | 0         | 1         | 1         |
| Mlc1_j2          | 6.3039    | 5.2425          | 0         | 1         | 1         |
| XLOC_011580      | 0.367352  | 0.198414        | 0         | 1         | 1         |
| Hdac10_j4        | 1.62562   | 1.84978         | 0         | 1         | 1         |
| Hdac10_j3        | 0.373396  | 0.630922        | 0         | 1         | 1         |
| Hdac10_j5        | 0.317988  | 0.333351        | 0         | 1         | 1         |
| Plxnb2_j2        | 2.50368   | 3.58288         | 0         | 1         | 1         |
| Fam116b          | 0.0921072 | 0.201819        | 0         | 1         | 1         |
| Fam116b_j9       | 0.0937205 | 0.0455411       | 0         | 1         | 1         |
| Sbf1_j1          | 3.13665   | 3.2762          | 0         | 1         | 1         |
| Sbf1_j11         | 0.0823772 | 0.0572897       | 0         | 1         | 1         |
| Lmf2_j3          | 0.107237  | 0               | 0         | 1         | 1         |
| Tymp_j1          | 2.06363   | 1.776           | 0         | 1         | 1         |
| Odf3b_j4         | 0.145931  | 0.0863854       | -0.756429 | 0.431585  | 0.743686  |
| Cpt1b_j4         | 0.0922357 | 0 -1.79769e+308 | 0.0012562 | 0.0012562 | 1         |
| Rabl2_j3         | 2.14425   | 2.13634         | 0         | 1         | 1         |
| Cpne8_j5         | 1.38701   | 1.19469         | -0.215345 | 0.454417  | 0.758641  |
| Kif21a_j1        | 1.35911   | 0               | 0         | 1         | 1         |



|              |             |                 |           |           |           |
|--------------|-------------|-----------------|-----------|-----------|-----------|
| Kif21a_j2    | 7.04428     | 16.099          | 0         | 1         | 1         |
| Kif21a_j3    | 0.441895    | 0               | 0         | 1         | 1         |
| Abcd2_j3     | 2.12716     | 0.991742        | 0         | 1         | 1         |
| Gxylt1_j1    | 0.121545    | 0.189225        | 0.63861   | 0.217503  | 0.563556  |
| Gxylt1_j4    | 0.342617    | 0.0208739       | -4.03682  | 0.38143   | 0.711932  |
| Gxylt1_j5    | 0.134528    | 0.0979898       | -0.457203 | 0.393266  | 1         |
| Adamts20_j10 | 0.11456     | 0.0250487       | -2.19329  | 0.138662  | 1         |
| Adamts20_j14 | 0.154428    | 0.0978604       | -0.658134 | 0.268306  | 0.61709   |
| Twf1_j3      | 12.6823     | 13.3993         | 0.0793415 | 0.460085  | 0.76171   |
| Twf1_j4      | 1.0073      | 1.61457         | 0.68065   | 0.0125092 | 0.101222  |
| Nell2_j1     | 0.348796    | 0.535953        | 0         | 1         | 1         |
| Dbx2_j6      | 0.20919     | 0.0993943       | -1.07358  | 0.642822  | 0.862213  |
| XLOC_011611  | 0.631209    | 0.672437        | 0         | 1         | 1         |
| AK163711_j2  | 0.139347    | 0 -1.79769e+308 | 0.0126309 | 0.101902  |           |
| Scaf11_j1    | 0.133521    | 0 -1.79769e+308 | 1.96E-07  | 1         |           |
| Slc38a1_j1   | 2.5546      | 0.018393        | 0         | 1         | 1         |
| Slc38a2_j1   | 0.587173    | 0.23245         | 0         | 1         | 1         |
| Rapgef3_j3   | 0.199593    | 0.152812        | -0.385303 | 0.522062  | 0.798655  |
| Senp1_j1     | 0.236406    | 0.216154        | -0.129206 | 0.742644  | 0.90994   |
| Senp1_j2     | 1.24163     | 1.35407         | 0.125067  | 0.436068  | 0.746763  |
| Asb8_j1      | 12.2099     | 13.0688         | 0         | 1         | 1         |
| Ccnt1_j3     | 0.0779828   | 0.0298337       | 0         | 1         | 1         |
| Adcy6_j11    | 0.0626628   | 0 -1.79769e+308 | 0.077483  | 1         |           |
| Adcy6_j13    | 0.183909    | 0 -1.79769e+308 | 1.59E-05  | 0.0004596 |           |
| Fkbp11       | 0.261004    | 0.307992        | 0.238824  | 0.532391  | 0.804231  |
| Arf3_j2      | 13.6253     | 21.1151         | 0         | 1         | 1         |
| Prkag1_j3    | 1.44142     | 1.07816         | -0.418928 | 0.31838   | 0.66179   |
| Prkag1_j4    | 0.0571405   | 0.176967        | 1.6309    | 0.178907  | 0.518526  |
| Mll2_j5      | 5.45201     | 5.86185         | 0.104569  | 0.401238  | 0.724532  |
| Rhebl1_j4    | 2.11347     | 3.34548         | 0         | 1         | 1         |
| Lmbr1_j5     | 0.382499    | 0.494292        | 0         | 1         | 1         |
| Mcrs1_j1     | 0.690605    | 0.735216        | 0.0903079 | 0.806273  | 0.935928  |
| Fmnl3_j1     | 0.652075    | 0.531645        | -0.294573 | 0.38152   | 0.711932  |
| Nckap5l_j2   | 1.38386     | 0.013691        | 0         | 1         | 1         |
| Nckap5l_j1   | 0.000362291 | 0.966063        | 0         | 1         | 1         |
| Faim2_j2     | 1.66277     | 4.59452         | 1.46633   | 7.55E-15  | 1.46E-12  |
| Racgap1_j1   | 0.173631    | 0 -1.79769e+308 | 8.60E-05  | 0.0018834 |           |
| Racgap1_j6   | 0.195307    | 0.0593762       | -1.71779  | 0.0703325 | 0.318545  |
| Lass5_j3     | 7.0811      | 8.94094         | 0         | 1         | 1         |
| Lass5_j9     | 1.72127     | 1.03075         | 0         | 1         | 1         |
| Slc11a2_j2   | 0.986909    | 0.0701439       | 0         | 1         | 1         |
| Csrnp2_j1    | 0.110426    | 0.163885        | 0.569605  | 0.362128  | 0.696456  |
| Tcfcp2_j10   | 0.88523     | 0.766559        | 0         | 1         | 1         |
| Tcfcp2_j11   | 0.516898    | 0.27094         | 0         | 1         | 1         |
| Pou6f1_j1    | 2.15331     | 2.78            | 0         | 1         | 1         |
| BC141885_j5  | 0.0598252   | 7.64E-05        | -9.61218  | 0.974882  | 1         |
| Cela1_j1     | 0.27612     | 0.874948        | 1.6639    | 0.0116251 | 0.0957862 |

|                   |           |           |               |           |           |
|-------------------|-----------|-----------|---------------|-----------|-----------|
| Galnt6_j2         | 0.23314   | 0.0105211 | 0             | 1         | 1         |
| Rarg_j1           | 1.33021   | 1.38988   | 0             | 1         | 1         |
| Rarg              | 0.627379  | 0.371314  | 0             | 1         | 1         |
| Map3k12           | 0.469454  | 0.495168  | 0             | 1         | 1         |
| Atf7              | 1.44887   | 1.39484   | -0.0548298    | 0.767553  | 0.920744  |
| Cbx5_j1           | 7.60772   | 9.38412   | 0.302758      | 0.0445306 | 0.240823  |
| Oxct1_j1          | 28.8247   | 33.8054   | 0             | 1         | 1         |
| Plcx3_j1          | 9.63935   | 8.32808   | 0             | 1         | 1         |
| Ttc33_j2          | 0         | 0.249971  | 0             | 1         | 1         |
| Fyb_j1            | 0         | 0.758878  | 1.79769e+308  | 1.24E-12  | 1.75E-10  |
| Fyb_j4            | 0         | 0.0570804 | 1.79769e+308  | 0.0223523 | 1         |
| Rictor_j4         | 0.3496    | 0.644816  | 0.88318       | 0.113666  | 0.419374  |
| 2410089E03Rik_j4  | 0.0482976 | 0         | -1.79769e+308 | 0.0008311 | 1         |
| 2410089E03Rik_j3  | 0.107356  | 0.128274  | 0.256826      | 0.600668  | 1         |
| 2410089E03Rik_j12 | 1.70915   | 2.0534    | 0.264731      | 0.247162  | 0.594674  |
| Capsl             | 0.22668   | 0.109854  | -1.04507      | 0.25321   | 0.601204  |
| Prlr              | 0.161338  | 0.265654  | 0.719464      | 0.163744  | 0.499255  |
| Golph3_j1         | 13.0575   | 10.3872   | 0             | 1         | 1         |
| Drosha_j1         | 0.76715   | 1.12139   | 0             | 1         | 1         |
| Cdh9_j3           | 0.101166  | 0.135558  | 0             | 1         | 1         |
| Cdh10_j1          | 0.0754551 | 0.527162  | 2.80456       | 3.50E-08  | 2.15E-06  |
| Myo10             | 1.29509   | 1.31868   | 0             | 1         | 1         |
| Myo10_j6          | 2.69227   | 5.91192   | 0             | 1         | 1         |
| Zfp622_j1         | 13.0583   | 13.5448   | 0.052779      | 0.794833  | 0.931484  |
| Ctnnd2_j7         | 2.17936   | 2.86401   | 0             | 1         | 1         |
| Dap_j1            | 5.07044   | 5.35465   | 0.0786833     | 0.693945  | 0.88705   |
| Pgcp_j1           | 1.82628   | 2.13316   | 0.224087      | 0.42066   | 0.736821  |
| Vps13b_j2         | 0.144683  | 0.243663  | 0.751991      | 0.0223967 | 0.152567  |
| Spag1_j5          | 0.210947  | 0.149328  | -0.498391     | 0.410957  | 0.730555  |
| XLOC_010995       | 0         | 0.206231  | 1.79769e+308  | 0.0083444 | 0.0748829 |
| XLOC_010995       | 0.0947084 | 0.204022  | 1.10716       | 0.229417  | 0.576488  |
| XLOC_010995       | 0.10572   | 0.116206  | 0.13643       | 0.914268  | 1         |
| Rims2_j4          | 0         | 0.0822756 | 1.79769e+308  | 0.0006711 | 1         |
| Rims2_j6          | 0         | 0.126973  | 1.79769e+308  | 7.79E-05  | 1         |
| Rims2_j8          | 0.217516  | 0.161403  | -0.430456     | 0.278711  | 0.627544  |
| XLOC_011007       | 0         | 0.155297  | 1.79769e+308  | 0.0026797 | 1         |
| Oxr1_j2           | 12.1439   | 7.3883    | -0.716919     | 1.10E-07  | 5.83E-06  |
| Oxr1_j3           | 12.4757   | 7.22351   | -0.788344     | 1.73E-11  | 2.01E-09  |
| Ebag9             | 0.588346  | 0.595911  | 0             | 1         | 1         |
| A930017M01Rik_j1  | 0.316341  | 0.244683  | -0.37057      | 0.411441  | 0.730688  |
| XLOC_011018       | 2.84754   | 3.07307   | 0.109962      | 0.597507  | 0.840295  |
| XLOC_011019       | 0.0944584 | 0.138192  | 0.548927      | 0.510734  | 1         |
| Mal2_j1           | 0         | 0.366942  | 1.79769e+308  | 0.0004911 | 0.0080248 |
| Deptor_j3         | 1.42429   | 4.64299   | 0             | 1         | 1         |
| Col14a1_j4        | 0.0474147 | 0.418633  | 3.14228       | 5.14E-08  | 3.01E-06  |
| Wdr67_j3          | 0.0528224 | 0.0362907 | -0.54155      | 0.673368  | 1         |
| Wdr67_j12         | 0         | 0.117006  | 1.79769e+308  | 0.0667847 | 1         |

|               |           |           |              |           |           |
|---------------|-----------|-----------|--------------|-----------|-----------|
| Fer1l6_j2     | 0.0512153 | 0.17242   | 1.75128      | 0.113671  | 0.419374  |
| Pvt1_j4       | 0.301153  | 0.550032  | 0.869019     | 0.0128776 | 0.103413  |
| Efr3a_j4      | 0         | 0.191717  | 0            | 1         | 1         |
| XLOC_011051   | 0.056774  | 0.218163  | 1.94211      | 0.227608  | 0.574755  |
| Phf20l1_j1    | 0         | 0.118067  | 0            | 1         | 1         |
| Wisp1_j2      | 0.354704  | 0.383723  | 0.11345      | 0.739259  | 0.908465  |
| Wisp1         | 0.0792125 | 0.273381  | 1.78711      | 0.0008055 | 0.0120371 |
| Khdrbs3_j3    | 2.31654   | 4.84133   | 0            | 1         | 1         |
| Chrac1_j1     | 0.0731882 | 0.0575586 | -0.34658     | 0.558798  | 1         |
| mKIAA0870_j6  | 0.0780211 | 0.0617552 | -0.337305    | 0.797803  | 1         |
| mKIAA0870_j9  | 0.236466  | 0.138903  | -0.767555    | 0.287544  | 0.635654  |
| mKIAA0870_j11 | 0         | 0.0635565 | 1.79769e+308 | 0.122163  | 1         |
| Ptp4a3        | 1.12819   | 1.41394   | 0.325709     | 0.311444  | 0.656133  |
| Ptp4a3_j1     | 0.155075  | 0.337327  | 1.12118      | 0.214184  | 0.559534  |
| Ptp4a3_j2     | 0         | 0.153738  | 1.79769e+308 | 0.059615  | 1         |
| Bai1_j4       | 0.889465  | 1.10923   | 0.318554     | 0.172575  | 0.510021  |
| Bai1_j6       | 3.2354    | 2.97003   | -0.123466    | 0.570584  | 0.826442  |
| Bai1_j8       | 1.39931   | 2.22803   | 0.671047     | 0.0122801 | 0.0998658 |
| Ly6g_j1       | 0.0355523 | 0.212811  | 0            | 1         | 1         |
| Rhpn1_j3      | 1.11997   | 1.17895   | 0.0740488    | 0.779386  | 0.925607  |
| AK158547_j2   | 0.157014  | 0.226094  | 0.526034     | 0.431967  | 0.74396   |
| AK158547_j3   | 0.0502585 | 0.0666848 | 0.40799      | 0.695357  | 1         |
| Grina_j2      | 15.589    | 13.9196   | -0.163407    | 0.329279  | 0.671533  |
| XLOC_011089   | 0.0644301 | 0.144212  | 1.16238      | 0.247543  | 1         |
| XLOC_011089   | 0.0720011 | 0.215426  | 1.5811       | 0.0987489 | 0.388529  |
| XLOC_011090   | 0.10153   | 0.137588  | 0.438451     | 0.61028   | 1         |
| Kifc2_j3      | 0.216328  | 0.331458  | 0            | 1         | 1         |
| Kifc2_j2      | 0.112981  | 0.327432  | 0            | 1         | 1         |
| Ppp1r16a_j5   | 0.0376407 | 0.131753  | 1.80747      | 0.0119935 | 1         |
| XLOC_011102   | 0.134613  | 0.196537  | 0.545982     | 0.397771  | 0.722114  |
| Commd5_j1     | 3.06987   | 2.6288    | 0            | 1         | 1         |
| XLOC_011105   | 0.0796233 | 0.0779432 | -0.0307672   | 0.980316  | 1         |
| XLOC_011106   | 0.171291  | 0.118874  | -0.527015    | 0.319997  | 0.663346  |
| Csf2rb_j1     | 0         | 0.302076  | 1.79769e+308 | 1.39E-06  | 5.51E-05  |
| Csf2rb_j6     | 0.270777  | 0.614397  | 1.18207      | 0.0029817 | 0.0342762 |
| Lgals1_j1     | 3.76395   | 15.6255   | 2.05358      | 1.19E-09  | 9.90E-08  |
| Triobp        | 0.0437297 | 0.170672  | 1.96454      | 0.0010699 | 0.0150815 |
| Maff_j1       | 0.259437  | 0.2135    | 0            | 1         | 1         |
| Apobec3_j1    | 0.520096  | 0.640831  | 0            | 1         | 1         |
| XLOC_011139   | 0.0692636 | 0.040739  | -0.765687    | 0.584048  | 1         |
| XLOC_011139   | 0.125218  | 0.0852826 | -0.554122    | 0.520191  | 1         |
| XLOC_011139   | 0.217755  | 0.349539  | 0.68275      | 0.0104177 | 0.0881303 |
| XLOC_011140   | 0         | 0.0759113 | 1.79769e+308 | 0.0657531 | 1         |
| Mgat3_j1      | 14.9411   | 4.21159   | 0            | 1         | 1         |
| Smcr7l        | 4.33037   | 4.21857   | 0            | 1         | 1         |
| Smcr7l_j2     | 2.58542   | 3.32898   | 0            | 1         | 1         |
| Cacna1i_j2    | 0         | 0.0581855 | 1.79769e+308 | 0.0831166 | 1         |

|             |            |           |              |           |           |
|-------------|------------|-----------|--------------|-----------|-----------|
| Cacna1i_j6  | 0          | 0.114824  | 1.79769e+308 | 0.001445  | 1         |
| Fam83f_j3   | 0.518775   | 0.27777   | -0.901216    | 0.0558086 | 0.276139  |
| Zc3h7b_j2   | 1.32822    | 7.04182   | 0            | 1         | 1         |
| Tef_j3      | 0          | 0.0834665 | 1.79769e+308 | 0.0232779 | 1         |
| Mpped1_j1   | 0.190891   | 0.26392   | 0.467355     | 0.415783  | 0.733552  |
| Samm50_j2   | 7.98388    | 5.17245   | -0.626242    | 0.0001498 | 0.0030124 |
| Samm50_j4   | 16.3483    | 19.6204   | 0.263219     | 0.020959  | 0.145548  |
| Parvb_j4    | 27.021     | 27.6051   | 0            | 1         | 1         |
| Parvb_j5    | 0          | 0.086332  | 0            | 1         | 1         |
| Parvg_j2    | 7.12E-05   | 0.119667  | 10.7157      | 0.944965  | 1         |
| Prr5_j2     | 3.82318    | 3.86242   | 0.014731     | 0.915094  | 0.97351   |
| XLOC_011191 | 0.168695   | 0.198547  | 0.235064     | 0.51689   | 0.795275  |
| Ppara       | 0.00496892 | 0.131602  | 4.72711      | 0.198168  | 1         |
| Trmu_j3     | 1.4073     | 1.83969   | 0.386528     | 0.0423989 | 0.232786  |
| Tbc1d22a_j2 | 0.112803   | 0.180607  | 0.67905      | 0.25865   | 0.607438  |
| Tbc1d22a_j9 | 0          | 0.136668  | 1.79769e+308 | 0.0409647 | 1         |
| Panx2_j1    | 7.65325    | 5.57638   | 0            | 1         | 1         |
| Trabd       | 5.35534    | 5.77714   | 0.109376     | 0.518272  | 0.796383  |
| Ppp6r2_j5   | 1.53124    | 1.69706   | 0            | 1         | 1         |
| Ncaph2_j5   | 8.84044    | 9.07821   | 0            | 1         | 1         |
| Mapk8ip2_j2 | 0          | 0.0523721 | 0            | 1         | 1         |
| Shank3_j2   | 0.133954   | 0.0558398 | -1.26238     | 0.065776  | 1         |
| Shank3_j11  | 0.558372   | 0.415726  | -0.425592    | 0.18508   | 0.525262  |
| Acr_j1      | 0.0864372  | 0.077198  | -0.163088    | 0.894035  | 1         |
| Lrrk2_j3    | 5.72637    | 4.74721   | -0.270541    | 0.0658108 | 0.306031  |
| Cntn1_j3    | 2.48714    | 0.445476  | 0            | 1         | 1         |
| Cntn1_j4    | 0.640702   | 2.29486   | 0            | 1         | 1         |
| XLOC_011224 | 0.0146097  | 0.137391  | 3.23328      | 0.0742794 | 1         |
| XLOC_011224 | 0.0334384  | 0.243733  | 2.86572      | 0.0027923 | 0.0325204 |
| Pphln1_j7   | 0          | 0.265398  | 0            | 1         | 1         |
| Irak4       | 0.563819   | 0.774022  | 0.457144     | 0.1135    | 0.41925   |
| Gm4371_j2   | 0.0439819  | 0.262739  | 2.57865      | 0.0247702 | 0.163222  |
| Tmem106c_j2 | 1.07978    | 0.962833  | -0.165382    | 0.736218  | 0.907153  |
| Cacnb3_j1   | 7.44379    | 5.08368   | 0            | 1         | 1         |
| Ccdc65_j1   | 0.0519609  | 0.0921338 | 0.826304     | 0.461729  | 1         |
| Prph_j1     | 1.21312    | 1.01115   | 0            | 1         | 1         |
| Prph_j7     | 27.2096    | 38.1227   | 0            | 1         | 1         |
| Prph_j8     | 2.17084    | 1.89779   | 0            | 1         | 1         |
| Prph_j10    | 3.8257     | 7.69421   | 0            | 1         | 1         |
| Kcnh3_j3    | 0.711436   | 0.675118  | -0.0755938   | 0.781523  | 0.926274  |
| AK007210_j2 | 0.214898   | 0.106607  | -1.01136     | 0.213279  | 0.558495  |
| Prpf40b_j4  | 1.22466    | 1.4588    | 0.252403     | 0.318703  | 0.662023  |
| Prpf40b_j10 | 0.370775   | 1.04112   | 1.48952      | 3.04E-05  | 0.0007834 |
| Prpf40b_j11 | 0.212006   | 0.139518  | -0.603652    | 0.426617  | 0.741282  |
| Tmbim6      | 1.83461    | 4.15944   | 0            | 1         | 1         |
| XLOC_011262 | 0.321814   | 0.271253  | -0.246588    | 0.683261  | 0.881397  |
| Larp4_j1    | 0.0549248  | 0.255189  | 2.21604      | 0.0712216 | 0.320873  |

|             |            |           |               |           |           |
|-------------|------------|-----------|---------------|-----------|-----------|
| Larp4_j4    | 0.205797   | 0.214038  | 0.0566463     | 0.965324  | 0.990054  |
| Atf1_j2     | 0          | 0.658241  | 1.79769e+308  | 2.37E-05  | 0.0006367 |
| XLOC_011269 | 0.145486   | 0.282159  | 0             | 1         | 1         |
| AB099516_j1 | 5.05284    | 10.269    | 0             | 1         | 1         |
| XLOC_011271 | 0.0858107  | 0.147991  | 0.786281      | 0.544713  | 1         |
| Dazap2_j3   | 1.04855    | 3.03955   | 0             | 1         | 1         |
| Ankrd33_j2  | 0.459133   | 0.498547  | 0.118818      | 0.770818  | 0.922089  |
| Eif4b_j2    | 9.36185    | 9.59959   | 0             | 1         | 1         |
| Tenc1_j6    | 4.2735     | 4.62352   | 0             | 1         | 1         |
| Soat2_j2    | 0.0599309  | 0.153073  | 1.35285       | 0.19265   | 1         |
| Soat2_j3    | 0.0554118  | 0.135453  | 1.28952       | 0.360516  | 1         |
| Zfp740_j4   | 1.6526     | 1.8419    | 0             | 1         | 1         |
| Zfp740_j5   | 3.10038    | 4.36382   | 0             | 1         | 1         |
| Sp1_j2      | 0.513002   | 0.992201  | 0             | 1         | 1         |
| Prr13_j2    | 20.8451    | 25.7327   | 0             | 1         | 1         |
| XLOC_011296 | 0.0112017  | 0.0804631 | 2.84461       | 0.321268  | 1         |
| Nckap1_j2   | 0.245632   | 0.778941  | 1.66502       | 0.0006882 | 0.0105789 |
| Ccdc152_j1  | 0.111336   | 0.134037  | 0.26771       | 0.612127  | 1         |
| Fbxo4_j1    | 0.249329   | 0.205352  | -0.279955     | 0.620864  | 0.851388  |
| Osmr_j4     | 0          | 0.118739  | 0             | 1         | 1         |
| Nipbl_j4    | 2.56711    | 3.0472    | 0.24734       | 0.201767  | 0.545317  |
| Skp2_j3     | 0          | 0.114156  | 1.79769e+308  | 0.0340998 | 1         |
| XLOC_011329 | 0          | 0.0630152 | 1.79769e+308  | 0.0796853 | 1         |
| Dnajc21_j2  | 4.05978    | 4.71305   | 0             | 1         | 1         |
| Pdzd2_j5    | 0          | 0.146258  | 0             | 1         | 1         |
| Pdzd2_j6    | 0.144362   | 0.201678  | 0             | 1         | 1         |
| Trio_j6     | 0.24624    | 0.611322  | 0             | 1         | 1         |
| Trio_j13    | 0.73393    | 2.3885    | 0             | 1         | 1         |
| Pabpc1_j3   | 4.01409    | 4.85175   | 0             | 1         | 1         |
| Ywhaz_j4    | 80.4059    | 76.5426   | -0.0710396    | 0.612687  | 0.847359  |
| Ywhaz_j5    | 9.87689    | 11.0292   | 0.159199      | 0.498852  | 0.784147  |
| Ncald       | 7.53924    | 7.26336   | 0             | 1         | 1         |
| Rrm2b_j3    | 0.497369   | 0.678969  | 0             | 1         | 1         |
| Rrm2b_j2    | 0.345302   | 0.411756  | 0             | 1         | 1         |
| Rrm2b_j4    | 2.33891    | 2.50069   | 0             | 1         | 1         |
| Klf10_j2    | 6.16917    | 7.65229   | 0             | 1         | 1         |
| Angpt1_j2   | 0          | 0.28576   | 1.79769e+308  | 2.53E-05  | 0.0006713 |
| Rspo2_j10   | 0.267077   | 0.45704   | 0             | 1         | 1         |
| AK148391_j1 | 0.1278     | 0.256625  | 1.00577       | 0.0558089 | 0.276139  |
| Sybu_j5     | 1.64318    | 2.04336   | 0             | 1         | 1         |
| XLOC_011392 | 0.00753389 | 0.0679059 | 3.17207       | 0.0426243 | 1         |
| Samd12      | 0.207328   | 1.52072   | 0             | 1         | 1         |
| Samd12      | 3.43769    | 3.07747   | 0             | 1         | 1         |
| Enpp2_j7    | 2.02253    | 2.24668   | 0.151637      | 0.599618  | 0.841292  |
| Enpp2_j8    | 0.323189   | 0.642764  | 0.991913      | 0.0137385 | 0.108008  |
| Enpp2       | 0.208275   | 0         | -1.79769e+308 | 1.30E-05  | 0.000388  |
| Derl1_j2    | 1.41356    | 2.81159   | 0             | 1         | 1         |

|                  |           |           |              |           |          |
|------------------|-----------|-----------|--------------|-----------|----------|
| Derl1_j3         | 0.664608  | 0.964196  | 0            | 1         | 1        |
| 9130401M01Rik_j1 | 11.308    | 13.397    | 0.24456      | 0.0365534 | 0.211393 |
| Atad2_j2         | 1.37651   | 1.39039   | 0            | 1         | 1        |
| Klhl38           | 0.187823  | 0.209452  | 0.157244     | 0.682491  | 0.880856 |
| Fam49b_j4        | 1.17666   | 1.38211   | 0            | 1         | 1        |
| Kcnq3_j1         | 0.186748  | 0.279829  | 0            | 1         | 1        |
| Sla_j1           | 0         | 0.0899958 | 1.79769e+308 | 0.0302997 | 1        |
| XLOC_011435      | 7.87169   | 9.57177   | 0.282112     | 0.229079  | 0.576167 |
| XLOC_011437      | 0.163325  | 0.262358  | 0.68379      | 0.0757334 | 0.33241  |
| Ptk2_j7          | 0.384152  | 0.60663   | 0            | 1         | 1        |
| Slc45a4_j4       | 0.391865  | 1.91433   | 0            | 1         | 1        |
| Slc45a4_j7       | 5.39184   | 4.65115   | 0            | 1         | 1        |
| Slurp1           | 0.135494  | 0.564371  | 2.05841      | 0.0240648 | 0.160002 |
| Ly6k             | 0.0869402 | 0.187393  | 1.10797      | 0.342652  | 0.682489 |
| Ly6a_j2          | 1.13573   | 3.63856   | 0            | 1         | 1        |
| Ly6c1_j4         | 0         | 0.529049  | 0            | 1         | 1        |
| Ly6h             | 31.3406   | 27.1634   | -0.206371    | 0.116232  | 0.424258 |
| Zc3h3_j1         | 0.504207  | 0.804723  | 0.674476     | 0.0569716 | 0.279574 |
| Zc3h3_j5         | 0.0232251 | 0.0615798 | 1.40677      | 0.459021  | 1        |
| Naprt1_j4        | 0.455413  | 0.571341  | 0.327178     | 0.568715  | 0.825674 |
| Pycrl_j2         | 0         | 0.0546227 | 1.79769e+308 | 0.149488  | 1        |
| Tsta3_j2         | 1.79136   | 2.65642   | 0.568424     | 0.21459   | 0.560024 |
| Puf60_j2         | 28.3692   | 30.312    | 0            | 1         | 1        |
| Nrbp2_j9         | 17.7644   | 21.5995   | 0            | 1         | 1        |
| Nrbp2_j10        | 3.65987   | 3.42225   | 0            | 1         | 1        |
| Plec_j3          | 22.9694   | 25.2167   | 0.134666     | 0.123374  | 0.437384 |
| Oplah_j3         | 2.77402   | 3.25016   | 0            | 1         | 1        |
| Cpsf1_j7         | 3.51615   | 3.45401   | 0            | 1         | 1        |
| Vps28_j8         | 0.688244  | 0.510333  | -0.431481    | 0.50025   | 0.785042 |
| Vps28_j9         | 0         | 0.417397  | 1.79769e+308 | 0.0274835 | 0.175386 |
| Tonsl_j4         | 0.13385   | 0.672682  | 2.3293       | 1.26E-08  | 8.65E-07 |
| Cyhr1_j3         | 6.27257   | 6.87915   | 0.133174     | 0.556252  | 0.818821 |
| Arhgap39_j2      | 0.749982  | 1.01292   | 0.433597     | 0.0226789 | 0.153721 |
| Arhgap39_j1      | 1.53306   | 1.21349   | -0.337253    | 0.0389219 | 0.220001 |
| Rbfox2           | 7.29795   | 11.0731   | 0            | 1         | 1        |
| XLOC_011483      | 0.0210106 | 0.0760862 | 1.85652      | 0.170161  | 1        |
| Myh9_j4          | 18.4731   | 22.1139   | 0            | 1         | 1        |
| Myh9_j7          | 4.28529   | 7.6587    | 0            | 1         | 1        |
| Eif3d_j3         | 23.2536   | 29.2001   | 0            | 1         | 1        |
| Ift27            | 10.3734   | 9.10337   | -0.18842     | 0.227437  | 0.574684 |
| Pvalb_j4         | 113.39    | 48.6678   | -1.22026     | 0         | 0        |
| Csf2rb2_j1       | 0.190432  | 0.304639  | 0.677829     | 0.090896  | 0.370619 |
| Tmprss6_j4       | 0.0579189 | 0.0998317 | 0.785464     | 0.751447  | 1        |
| Il2rb_j1         | 0         | 0.056851  | 1.79769e+308 | 0.0935342 | 1        |
| C1qtnf6_j1       | 0.0730151 | 0.153897  | 1.0757       | 0.206115  | 1        |
| Mfng_j2          | 0         | 0.203315  | 1.79769e+308 | 0.0184886 | 0.133531 |
| Ankrd54_j1       | 3.04497   | 3.23823   | 0.0887762    | 0.748031  | 0.912342 |

|                  |            |           |              |           |           |
|------------------|------------|-----------|--------------|-----------|-----------|
| Pla2g6_j7        | 0.59724    | 0.904243  | 0            | 1         | 1         |
| Tmem184b_j4      | 0.693167   | 1.24051   | 0            | 1         | 1         |
| Kcnj4_j4         | 2.04159    | 1.70798   | -0.257404    | 0.277799  | 0.626672  |
| Josd1_j1         | 0.0272884  | 0.0753104 | 1.46456      | 0.284052  | 1         |
| Sun2_j6          | 0.0442153  | 0.0969123 | 0            | 1         | 1         |
| Sun2_j5          | 0.0527417  | 0.0807855 | 0            | 1         | 1         |
| Pdgb_j3          | 0.00039465 | 0.172788  | 8.77421      | 0.710033  | 0.894336  |
| Rangap1_j4       | 1.89464    | 1.3367    | 0            | 1         | 1         |
| Rangap1_j5       | 1.77466    | 1.41497   | 0            | 1         | 1         |
| Nhp2l1_j2        | 0          | 0.151263  | 0            | 1         | 1         |
| Al848285_j2      | 0.0964839  | 0.118916  | 0.301578     | 0.783629  | 1         |
| Tnfrsf13c        | 0.0317718  | 0.074284  | 1.22531      | 0.443825  | 1         |
| Tcf20_j3         | 2.03161    | 2.90922   | 0            | 1         | 1         |
| Rrp7a_j2         | 2.29646    | 2.3066    | 0            | 1         | 1         |
| Cyb5r3_j3        | 0          | 0.263827  | 0            | 1         | 1         |
| Cyb5r3_j4        | 102.039    | 124.877   | 0            | 1         | 1         |
| Arfgap3          | 18.5579    | 20.4539   | 0.140338     | 0.166285  | 0.502874  |
| 1700001L05Rik_j5 | 2.222      | 1.90716   | 0            | 1         | 1         |
| Pacsin2_j6       | 11.8306    | 9.47372   | 0            | 1         | 1         |
| Ttll12_j4        | 0          | 1.77812   | 1.79769e+308 | 7.55E-09  | 5.36E-07  |
| Scube1           | 0          | 0.193578  | 1.79769e+308 | 2.06E-05  | 0.0005668 |
| Scube1           | 0.199416   | 0.0995954 | -1.00163     | 0.069428  | 0.315947  |
| Sult4a1_j3       | 0.923262   | 1.42694   | 0            | 1         | 1         |
| Sult4a1_j4       | 13.9964    | 14.5381   | 0            | 1         | 1         |
| Phf21b           | 0          | 0.16134   | 1.79769e+308 | 0.0023152 | 0.0280248 |
| Celsr1_j1        | 0.0720501  | 0.0170691 | -2.07761     | 0.0079031 | 1         |
| Cerk_j6          | 0.152678   | 0.13004   | 0            | 1         | 1         |
| Brd1_j4          | 0.556698   | 0.689176  | 0            | 1         | 1         |
| Brd1_j6          | 0          | 0.0810462 | 0            | 1         | 1         |
| Brd1_j5          | 0.0761662  | 0.221078  | 0            | 1         | 1         |
| Alg12_j1         | 0.548788   | 0.571122  | 0.0575511    | 0.901473  | 0.968727  |
| Ttll8_j1         | 0          | 0.292138  | 1.79769e+308 | 0.0097097 | 0.0838612 |
| Mlc1_j4          | 0          | 0.585693  | 0            | 1         | 1         |
| Fam116b_j3       | 0.622559   | 1.34967   | 0            | 1         | 1         |
| Sbf1_j7          | 0.0307797  | 0.0940733 | 0            | 1         | 1         |
| Sbf1_j8          | 0.125412   | 0.0926218 | 0            | 1         | 1         |
| Cpt1b_j7         | 0.0790643  | 0.0557715 | -0.503499    | 0.661104  | 1         |
| Cpt1b_j15        | 0          | 0.0907883 | 1.79769e+308 | 0.0552947 | 1         |
| Rabl2_j2         | 4.7817     | 6.77873   | 0            | 1         | 1         |
| Syt10            | 0.255579   | 0.289055  | 0.177571     | 0.516772  | 0.795273  |
| Cpne8_j4         | 0.701232   | 1.43973   | 1.03783      | 0.0010848 | 0.0152202 |
| Kif21a_j12       | 2.87003    | 3.30988   | 0            | 1         | 1         |
| Kif21a_j13       | 1.42317    | 4.37273   | 0            | 1         | 1         |
| Kif21a_j14       | 21.8548    | 15.5553   | 0            | 1         | 1         |
| Abcd2_j1         | 1.13953    | 1.13181   | 0            | 1         | 1         |
| YAF2_j1          | 0          | 1.20345   | 0            | 1         | 1         |
| Prickle1_j1      | 0.0689128  | 0.087792  | 0.349317     | 0.63804   | 1         |

|                  |           |           |              |           |           |
|------------------|-----------|-----------|--------------|-----------|-----------|
| Adamts20_j7      | 4.79E-05  | 0.374555  | 12.9325      | 0.93326   | 0.979703  |
| Adamts20_j8      | 0.0618133 | 0.0739144 | 0.257938     | 0.681497  | 1         |
| Adamts20_j11     | 0         | 0.0886129 | 1.79769e+308 | 0.0021565 | 1         |
| Adamts20_j15     | 0.0777372 | 0.0734456 | -0.0819296   | 0.911462  | 1         |
| Nell2_j2         | 0.471199  | 0.289451  | 0            | 1         | 1         |
| Dbx2             | 0         | 0.223318  | 1.79769e+308 | 0.0133444 | 0.105957  |
| Dbx2_j3          | 0.153562  | 0.0714463 | -1.10389     | 0.43348   | 0.744803  |
| Scaf11_j4        | 1.2725    | 0.801711  | -0.666517    | 0.0019691 | 0.0246863 |
| Slc38a1_j6       | 0.0601046 | 0.131131  | 0            | 1         | 1         |
| Slc38a1_j5       | 0.0375748 | 0.133155  | 0            | 1         | 1         |
| Slc38a2_j4       | 27.3283   | 25.6224   | 0            | 1         | 1         |
| Amigo2           | 1.12395   | 1.14506   | 0            | 1         | 1         |
| XLOC_011619      | 0.101803  | 0.0941564 | 0            | 1         | 1         |
| Rapgef3_j4       | 0.77702   | 1.23262   | 0.665708     | 0.096747  | 0.384126  |
| Hdac7_j2         | 0.0276941 | 0.0653021 | 0            | 1         | 1         |
| Hdac7_j3         | 1.36634   | 1.35296   | 0            | 1         | 1         |
| Col2a1_j3        | 0.480282  | 0.514659  | 0.0997347    | 0.87836   | 0.961099  |
| Zfp641_j1        | 0         | 0.218503  | 1.79769e+308 | 0.0003203 | 0.0056486 |
| 2310037I24Rik_j3 | 1.39423   | 1.54657   | 0.149608     | 0.606797  | 0.845132  |
| 2310037I24Rik_j4 | 1.73152   | 1.77944   | 0.0393847    | 0.851623  | 0.952877  |
| Ccnt1_j1         | 2.54393   | 2.20068   | 0            | 1         | 1         |
| Arf3_j5          | 3.36789   | 16.8641   | 0            | 1         | 1         |
| Ddn_j2           | 0         | 0.744944  | 0            | 1         | 1         |
| Mll2_j2          | 5.8919    | 6.0789    | 0.0450772    | 0.732813  | 0.905728  |
| Mll2_j7          | 0.265842  | 0.188967  | -0.492432    | 0.0987418 | 0.388529  |
| Rhebl1_j8        | 0.410283  | 0.712389  | 0            | 1         | 1         |
| Rhebl1           | 2.60349   | 3.14055   | 0            | 1         | 1         |
| Lmbr1_j7         | 2.47923   | 3.91903   | 0            | 1         | 1         |
| Mcrs1_j4         | 0.421601  | 0.293631  | -0.521873    | 0.200779  | 0.544177  |
| Mcrs1_j3         | 0.0610455 | 0.126315  | 1.04907      | 0.481278  | 1         |
| Fmnl3_j2         | 0         | 0.11504   | 1.79769e+308 | 0.0031974 | 1         |
| Racgap1_j4       | 0         | 0.154682  | 1.79769e+308 | 0.0090992 | 1         |
| Lass5_j8         | 0         | 0.181186  | 0            | 1         | 1         |
| Lass5_j7         | 0         | 0.0604241 | 0            | 1         | 1         |
| Slc11a2_j7       | 0         | 2.16017   | 0            | 1         | 1         |
| Tcfcp2_j8        | 0         | 0.123951  | 0            | 1         | 1         |
| Tcfcp2_j7        | 0         | 0.163569  | 0            | 1         | 1         |
| Tcfcp2_j9        | 7.08E-05  | 0.931973  | 0            | 1         | 1         |
| Pou6f1_j7        | 0.963242  | 1.41945   | 0            | 1         | 1         |
| Pou6f1_j6        | 0.201398  | 0.169525  | 0            | 1         | 1         |
| AK146183_j3      | 0.663251  | 0.845111  | 0            | 1         | 1         |
| Krt80_j2         | 0         | 0.0515557 | 1.79769e+308 | 0.0478377 | 1         |
| Spryd3           | 15.3731   | 15.9221   | 0            | 1         | 1         |
| Spryd3_j3        | 0         | 0.192123  | 0            | 1         | 1         |
| Map3k12_j2       | 4.9366    | 4.72021   | 0            | 1         | 1         |
| Map3k12_j3       | 6.62346   | 5.71772   | 0            | 1         | 1         |
| Atf7_j4          | 5.82226   | 5.34483   | -0.123436    | 0.265079  | 0.613897  |



|                   |             |                        |            |           |           |
|-------------------|-------------|------------------------|------------|-----------|-----------|
| Atp5g2_j1         | 0.19876     | 0.118379               | -0.747611  | 0.219145  | 0.565521  |
| Itga5_j1          | 0.0470424   | 0.46276                | 0          | 1         | 1         |
| Itga5_j2          | 0.182141    | 0.0558237              | 0          | 1         | 1         |
| XLOC_010939       | 0.574711    | 0.544672               | 0          | 1         | 1         |
| Dab2_j3           | 7.00E-05    | 0.205037               | 0          | 1         | 1         |
| Rictor_j2         | 0.52379     | 0.653462               | 0.319114   | 0.326926  | 0.66996   |
| Lifr_j1           | 1.20973     | 0.637807               | 0          | 1         | 1         |
| Nup155_j2         | 0.322413    | 0.557767               | 0          | 1         | 1         |
| 2410089E03Rik_j10 | 1.0989      | 1.39013                | 0.339167   | 0.134397  | 0.456305  |
| 2410089E03Rik_j16 | 0.0577459   | 0 -1.79769e+308        |            | 0.0511014 | 1         |
| XLOC_010947       | 0.0410632   | 0.182727               | 2.15377    | 0.231745  | 0.578797  |
| XLOC_010947       | 0           | 0.0555382 1.79769e+308 |            | 0.103033  | 1         |
| Lmbrd2_j1         | 0.0766783   | 0.0531882              | 0          | 1         | 1         |
| Zfr_j2            | 0.606957    | 0.92672                | 0          | 1         | 1         |
| Zfr_j5            | 0.691151    | 0.71625                | 0          | 1         | 1         |
| Drosha_j3         | 5.73232     | 8.5006                 | 0          | 1         | 1         |
| Cdh9_j6           | 0.547968    | 0.385297               | 0          | 1         | 1         |
| March11_j1        | 5.78053     | 4.97537                | -0.216398  | 0.410746  | 0.730416  |
| March11_j3        | 3.78067     | 2.9222                 | -0.371587  | 0.35424   | 0.69047   |
| Ctnnd2_j1         | 2.89526     | 3.55389                | 0          | 1         | 1         |
| Dap_j3            | 0.191297    | 0.0703899              | -1.44237   | 0.272348  | 0.621166  |
| XLOC_010981       | 0.233282    | 0.231515               | -0.0109679 | 0.98842   | 0.996486  |
| Spag1_j3          | 0.435812    | 0.59271                | 0.443621   | 0.101712  | 0.395032  |
| XLOC_010993       | 0.144002    | 0.144814               | 0.00810699 | 0.993897  | 0.99828   |
| XLOC_010995       | 5.06E-05    | 0.082019               | 10.6623    | 0.972804  | 1         |
| Baalc_j2          | 6.03578     | 10.4639                | 0.793812   | 4.51E-09  | 3.37E-07  |
| Dcaf13_j1         | 5.8867      | 6.38553                | 0          | 1         | 1         |
| Rims2_j3          | 0.439911    | 0.334271               | -0.396193  | 0.278861  | 0.627636  |
| Rims2_j11         | 0           | 0.0979727 1.79769e+308 |            | 0.0183328 | 1         |
| Rims2_j12         | 0.222569    | 0.345848               | 0.635887   | 0.172581  | 0.510021  |
| Rims2_j14         | 2.11276     | 2.90139                | 0.457617   | 0.193143  | 0.535528  |
| XLOC_011007       | 0.0445514   | 0.175587               | 1.97864    | 0.120727  | 0.432763  |
| Zfpm2_j3          | 0.156644    | 0.218556               | 0.480519   | 0.33796   | 0.678523  |
| Med30_j1          | 0           | 0.612332 1.79769e+308  |            | 0.0345265 | 0.203982  |
| Col14a1_j2        | 0.133947    | 0.43337                | 1.69394    | 1.08E-05  | 0.0003312 |
| Has2as_j1         | 0.134526    | 0.194543               | 0.532203   | 0.48193   | 0.775384  |
| Zhx2_j1           | 0.000131287 | 1.95179                | 0          | 1         | 1         |
| Wdr67_j4          | 0           | 0.0989241 1.79769e+308 |            | 0.0136351 | 1         |
| Wdr67             | 0.163248    | 0.172129               | 0.0764297  | 0.900473  | 0.968335  |
| Wdr67_j9          | 0.0623584   | 0.232656               | 1.89954    | 0.0187987 | 0.135159  |
| Wdr67_j11         | 0.031329    | 0.201678               | 2.68648    | 0.0210877 | 0.14613   |
| Nsmce2_j2         | 0.872324    | 0.975905               | 0          | 1         | 1         |
| Nsmce2_j3         | 0.137136    | 0.305531               | 0          | 1         | 1         |
| Myc_j1            | 0.107994    | 0.140718               | 0.381858   | 0.742942  | 1         |
| Pvt1_j6           | 3.54393     | 3.01862                | -0.231463  | 0.308203  | 0.653088  |
| Pvt1_j8           | 0.272263    | 0.364477               | 0.420826   | 0.279641  | 0.62836   |
| Pvt1_j13          | 0.0885693   | 0.147503               | 0.73587    | 0.356552  | 1         |

|              |           |             |              |           |           |
|--------------|-----------|-------------|--------------|-----------|-----------|
| Wisp1_j4     | 0.128378  | 0.0961814   | -0.416572    | 0.543803  | 1         |
| mKIAA0870_j8 | 0.132469  | 0.192425    | 0.538644     | 0.444607  | 0.752255  |
| Bai1         | 1.80347   | 0.686337    | -1.39379     | 2.28E-08  | 1.47E-06  |
| Bai1_j9      | 0.985718  | 0.89471     | -0.139754    | 0.74837   | 0.912414  |
| Bai1_j11     | 0.607016  | 0.64831     | 0.094949     | 0.857317  | 0.954789  |
| Ly6e         | 0.08174   | 0.373782    | 0            | 1         | 1         |
| Ly6e_j1      | 0         | 0.107838    | 0            | 1         | 1         |
| Gpihbp1_j2   | 0.440713  | 0.608218    | 0.464747     | 0.54882   | 0.814431  |
| Zfp41_j1     | 1.03138   | 1.1253      | 0.125737     | 0.557702  | 0.819799  |
| Rhpn1_j6     | 0.312373  | 0.183822    | -0.764958    | 0.163787  | 0.49929   |
| Gsdmd_j2     | 0.164264  | 0.183875    | 0.162716     | 0.783875  | 0.927213  |
| Gsdmd_j4     | 0.299627  | 0.40559     | 0.436851     | 0.334076  | 0.674869  |
| AK158547_j5  | 0.394375  | 0.429353    | 0.122594     | 0.583442  | 0.833129  |
| Gpaa1_j5     | 10.0857   | 10.0152     | 0            | 1         | 1         |
| Maf1         | 1.20982   | 1.06046     | 0            | 1         | 1         |
| XLOC_011089  | 0.0726938 | 0.0995997   | 0.454309     | 0.735861  | 1         |
| Brp16_j1     | 0.090239  | 0.299192    | 1.72925      | 0.0261244 | 0.169612  |
| Heatr7a_j2   | 0.0951569 | 0.0234917   | 0            | 1         | 1         |
| Heatr7a_j1   | 1.89975   | 0.457481    | 0            | 1         | 1         |
| Heatr7a_j5   | 3.21899   | 4.30639     | 0            | 1         | 1         |
| Kifc2_j1     | 1.46872   | 1.4456      | 0            | 1         | 1         |
| Kifc2        | 13.3573   | 10.4018     | 0            | 1         | 1         |
| Kifc2_j8     | 4.53964   | 4.91719     | 0            | 1         | 1         |
| Ppp1r16a_j7  | 0.385475  | 0.483985    | 0.328325     | 0.24326   | 0.590533  |
| Zfp7_j1      | 2.58217   | 2.32161     | 0            | 1         | 1         |
| Zfp7_j2      | 0.558428  | 0.779911    | 0            | 1         | 1         |
| Csf2rb_j5    | 0         | 0.159872    | 1.79769e+308 | 0.0012025 | 0.0165762 |
| Sh3bp1_j3    | 0.029564  | 0.221686    | 2.90661      | 0.0140983 | 0.110025  |
| Triobp_j2    | 0.0592608 | 0.0705142   | 0.250835     | 0.757312  | 1         |
| Micall1_j1   | 1.24823   | 2.09404     | 0            | 1         | 1         |
| Micall1_j2   | 3.69903   | 6.30009     | 0            | 1         | 1         |
| Pick1_j1     | 0.526519  | 0.628936    | 0.256427     | 0.451185  | 0.756435  |
| Cby1_j2      | 0.86056   | 1.05351     | 0.291861     | 0.339502  | 0.679743  |
| Cby1_j1      | 0.755133  | 0.778542    | 0.0440438    | 0.906193  | 0.970331  |
| XLOC_011139  | 0         | 0.285878    | 1.79769e+308 | 0.0023218 | 0.0280876 |
| XLOC_011139  | 0.105348  | 0.256739    | 1.28515      | 0.0985243 | 0.388048  |
| Tab1_j1      | 0.140725  | 0.145335    | 0.046503     | 0.95105   | 0.985865  |
| Smcr7l_j3    | 0.674727  | 1.11972     | 0            | 1         | 1         |
| Cacna1i_j8   | 0         | 0.0869675   | 1.79769e+308 | 0.0027393 | 1         |
| Fam83f_j1    | 0.267871  | 0.236199    | -0.181534    | 0.801243  | 0.933726  |
| Fam83f_j5    | 1.49E-05  | 0.0892154   | 12.5496      | 0.981697  | 1         |
| Tnrc6b_j1    | 0.131485  | 0.000143723 | -9.8374      | 0.668715  | 1         |
| Tnrc6b       | 0.0674333 | 0.323479    | 2.26214      | 5.44E-06  | 0.0001819 |
| Mchr1_j1     | 0.178188  | 0.946521    | 2.40923      | 3.70E-05  | 0.0009238 |
| Xpnpep3      | 1.40359   | 0.982412    | 0            | 1         | 1         |
| Ep300_j1     | 0.194848  | 0.195099    | 0            | 1         | 1         |
| L3mbtl2_j1   | 4.14915   | 3.91806     | -0.0826766   | 0.630335  | 0.856283  |

|                  |             |           |              |           |           |
|------------------|-------------|-----------|--------------|-----------|-----------|
| Tef_j4           | 0.331839    | 0.0892956 | -1.89382     | 0.0097214 | 0.0838932 |
| Aco2_j3          | 0           | 0.413654  | 1.79769e+308 | 0.0002593 | 0.0047584 |
| Ccdc134_j2       | 0.607371    | 0.828059  | 0            | 1         | 1         |
| XLOC_011168      | 0.35438     | 0.465604  | 0.393804     | 0.22944   | 0.576495  |
| Fam118a_j1       | 0.454753    | 0.590393  | 0.376593     | 0.377827  | 0.709468  |
| Atxn10_j3        | 109.031     | 106.147   | 0            | 1         | 1         |
| Ttc38_j1         | 1.1844      | 1.09598   | -0.111942    | 0.509224  | 0.790813  |
| Gramd4_j1        | 1.47917     | 1.09673   | 0            | 1         | 1         |
| Tbc1d22a_j4      | 0.0465999   | 0.0744645 | 0.676226     | 0.655657  | 1         |
| Mov10l1_j2       | 0           | 0.0541652 | 1.79769e+308 | 0.190232  | 1         |
| Ppp6r2_j3        | 3.84904     | 3.72519   | 0            | 1         | 1         |
| Ppp6r2_j2        | 3.62061     | 2.87824   | 0            | 1         | 1         |
| Ppp6r2_j6        | 1.38287     | 0.900744  | 0            | 1         | 1         |
| Ncaph2_j2        | 0.171068    | 0.0510871 | 0            | 1         | 1         |
| Ncaph2_j8        | 0.383282    | 0.530009  | 0            | 1         | 1         |
| Shank3           | 0.174862    | 0.234503  | 0.423396     | 0.288019  | 0.636068  |
| AK035742         | 0.064682    | 0.0729407 | 0.173359     | 0.897504  | 1         |
| XLOC_011224      | 0           | 1.49524   | 1.79769e+308 | 3.13E-06  | 0.000113  |
| Pphln1_j3        | 2.37815     | 1.57405   | 0            | 1         | 1         |
| Pphln1           | 3.12721     | 3.01274   | 0            | 1         | 1         |
| XLOC_011227      | 0.0925308   | 0.144418  | 0.642243     | 0.363243  | 1         |
| Ano6_j1          | 0.0597741   | 0.0577293 | 0            | 1         | 1         |
| Tmem106c_j1      | 0.17774     | 0.348643  | 0.97198      | 0.318187  | 0.661603  |
| Ccdc65_j4        | 0.35297     | 0.448225  | 0.344679     | 0.549721  | 0.814919  |
| XLOC_011252      | 0.251879    | 0.236742  | -0.0894176   | 0.86485   | 0.956985  |
| Prph_j2          | 466.29      | 554.32    | 0            | 1         | 1         |
| Dnajc22_j3       | 0.278331    | 0.143073  | -0.960045    | 0.204436  | 0.548567  |
| Prpf40b_j3       | 0.178512    | 0.331161  | 0.891513     | 0.0937705 | 0.377256  |
| Gpd1_j2          | 0.718686    | 0.699026  | 0            | 1         | 1         |
| Larp4_j3         | 0.482926    | 0.745474  | 0.626356     | 0.423137  | 0.738683  |
| Dip2b_j4         | 0           | 0.0467038 | 0            | 1         | 1         |
| Dip2b_j3         | 0           | 0.157716  | 0            | 1         | 1         |
| Dip2b            | 0.219494    | 0.129095  | 0            | 1         | 1         |
| Atf1_j3          | 0.0893881   | 0.0683682 | -0.386757    | 0.79788   | 1         |
| XLOC_011269      | 0.366176    | 0.427992  | 0            | 1         | 1         |
| Slc4a8_j3        | 1.22694     | 1.88933   | 0            | 1         | 1         |
| Scn8a_j3         | 4.8887      | 4.40488   | 0            | 1         | 1         |
| XLOC_011277      | 1.06915     | 1.24334   | 0.217751     | 0.528469  | 0.802033  |
| Nr4a1_j2         | 2.97489     | 3.83804   | 0            | 1         | 1         |
| 9430023L20Rik_j1 | 9.80853     | 9.96702   | 0.0231252    | 0.910734  | 0.97197   |
| Zfp740_j3        | 3.79896     | 3.35579   | 0            | 1         | 1         |
| Espl1_j4         | 0           | 0.0648709 | 1.79769e+308 | 0.0453879 | 1         |
| Espl1_j6         | 0           | 0.0810464 | 1.79769e+308 | 0.02776   | 1         |
| Sp1_j1           | 0.000259753 | 0.705604  | 0            | 1         | 1         |
| Prr13_j1         | 3.47512     | 4.76148   | 0            | 1         | 1         |
| XLOC_011296      | 0.189281    | 0.275482  | 0.54143      | 0.140804  | 0.466781  |
| Hoxc9_j4         | 0.60237     | 0.826029  | 0            | 1         | 1         |

|                  |            |                        |           |           |           |
|------------------|------------|------------------------|-----------|-----------|-----------|
| XLOC_011304      | 0.13745    | 0.107892               | 0         | 1         | 1         |
| Hoxc4_j2         | 1.13942    | 0.871131               | 0         | 1         | 1         |
| Hnrnpa1_j5       | 23.2729    | 20.9976                | -0.148425 | 0.16879   | 0.505572  |
| BC157982_j1      | 0          | 0.0643431 1.79769e+308 |           | 0.0875477 | 1         |
| Ptger4_j2        | 2.56908    | 2.71395                | 0         | 1         | 1         |
| Osmr_j1          | 0.304191   | 0.639322               | 0         | 1         | 1         |
| Osmr_j2          | 0.341537   | 0.698871               | 0         | 1         | 1         |
| Egflam_j4        | 1.43511    | 2.41757                | 0         | 1         | 1         |
| Nipbl_j3         | 0          | 0.169192 1.79769e+308  |           | 2.36E-05  | 0.0006341 |
| XLOC_011329      | 0.114698   | 0.163819               | 0.514256  | 0.217259  | 0.563457  |
| XLOC_011329      | 0.0451917  | 0.064495               | 0.513131  | 0.509668  | 1         |
| Rai14_j1         | 1.7829     | 1.30557                | 0         | 1         | 1         |
| Pdzd2_j9         | 0.154753   | 0.0606704              | 0         | 1         | 1         |
| Pdzd2_j10        | 0.238796   | 0.270661               | 0         | 1         | 1         |
| 6030458C11Rik_j1 | 2.02793    | 2.27922                | 0         | 1         | 1         |
| Cdh6_j1          | 0.0020002  | 0.794618               | 0         | 1         | 1         |
| Fam105a_j3       | 0.634814   | 0.78061                | 0.298269  | 0.523487  | 0.799355  |
| Trio_j15         | 0.173595   | 0.253932               | 0         | 1         | 1         |
| Ankrd33b_j1      | 0.00668457 | 0.38925                | 0         | 1         | 1         |
| Ropn1l_j1        | 0          | 0.10291 1.79769e+308   |           | 0.10234   | 1         |
| March6_j4        | 12.3597    | 11.7812                | 0         | 1         | 1         |
| Ywhaz_j6         | 43.765     | 48.8179                | 0.15763   | 0.416574  | 0.733896  |
| Zfp706_j2        | 25.0042    | 24.1057                | 0         | 1         | 1         |
| mKIAA0896        | 21.7878    | 22.9963                | 0         | 1         | 1         |
| Ubr5_j3          | 0.229928   | 0.443342               | 0         | 1         | 1         |
| XLOC_011375      | 0          | 0.149683 1.79769e+308  |           | 0.018807  | 1         |
| Rspo2_j1         | 7.54485    | 7.57917                | 0         | 1         | 1         |
| Rspo2_j2         | 0.321674   | 0.555456               | 0         | 1         | 1         |
| AK148391_j2      | 0          | 0.156265 1.79769e+308  |           | 0.0018332 | 1         |
| Sybu             | 0.0160194  | 0.670446               | 0         | 1         | 1         |
| XLOC_011392      | 0.322738   | 0.355925               | 0.14121   | 0.71798   | 0.898424  |
| Kcnv1_j4         | 2.14035    | 3.5682                 | 0         | 1         | 1         |
| Csmd3_j4         | 0          | 0.0710261 1.79769e+308 |           | 0.0967811 | 1         |
| Csmd3_j6         | 0.0550523  | 0.175049               | 1.66889   | 0.187954  | 0.529074  |
| XLOC_011395      | 1.15736    | 2.25969                | 0.965281  | 0.0916983 | 0.372116  |
| Eif3h_j1         | 30.6043    | 31.9328                | 0.0613038 | 0.569322  | 0.825874  |
| Ext1_j2          | 3.05964    | 3.15735                | 0.0453504 | 0.854022  | 0.953758  |
| Samd12_j5        | 0          | 0.0819259              | 0         | 1         | 1         |
| Enpp2_j10        | 0.414619   | 0.642315               | 0.631496  | 0.0853592 | 0.356607  |
| XLOC_011404      | 0.0597361  | 0.13757                | 1.20349   | 0.502268  | 1         |
| Mrpl13_j3        | 0.364755   | 4.91598                | 0         | 1         | 1         |
| XLOC_011409      | 0.0868175  | 0.165844               | 0.933768  | 0.17627   | 0.514987  |
| XLOC_011420      | 0          | 0.133939 1.79769e+308  |           | 0.0712126 | 1         |
| Asap1_j13        | 16.4882    | 15.7675                | 0         | 1         | 1         |
| Asap1_j16        | 12.4344    | 12.66                  | 0         | 1         | 1         |
| Asap1_j15        | 6.23647    | 7.57417                | 0         | 1         | 1         |
| Oc90_j2          | 0.0623827  | 0.16777                | 1.42727   | 0.159842  | 0.494363  |

|             |             |           |              |           |           |
|-------------|-------------|-----------|--------------|-----------|-----------|
| Ndr1_j2     | 0           | 0.534193  | 0            | 1         | 1         |
| St3gal1_j2  | 0.000148845 | 0.874779  | 0            | 1         | 1         |
| Eif2c2_j1   | 7.20506     | 7.26112   | 0.0111821    | 0.903375  | 0.969103  |
| Ptk2_j14    | 0.852788    | 1.15225   | 0            | 1         | 1         |
| Ptk2_j13    | 0.489083    | 1.51666   | 0            | 1         | 1         |
| Slc45a4_j1  | 0           | 0.540212  | 0            | 1         | 1         |
| Slc45a4_j2  | 0           | 0.418819  | 0            | 1         | 1         |
| Lynx1_j1    | 52.1026     | 48.136    | 0            | 1         | 1         |
| Naprt1_j7   | 0.0136192   | 0.226539  | 4.05604      | 0.0904936 | 0.369535  |
| Naprt1_j9   | 0.227698    | 0.271703  | 0.254912     | 0.664041  | 0.872726  |
| Naprt1_j11  | 0.237105    | 0.270503  | 0.190117     | 0.760352  | 0.917459  |
| Eef1d_j2    | 0.918055    | 1.00185   | 0.126012     | 0.676621  | 0.878369  |
| Fam83h_j2   | 0.406264    | 0.493925  | 0.281873     | 0.374767  | 0.707307  |
| Scrib_j3    | 0.132413    | 0.221407  | 0            | 1         | 1         |
| Scrib       | 1.3455      | 1.52886   | 0            | 1         | 1         |
| Nrbp2_j2    | 0.717009    | 0.406842  | 0            | 1         | 1         |
| Nrbp2_j4    | 0.531518    | 0.5972    | 0            | 1         | 1         |
| Nrbp2_j3    | 1.47859     | 1.71721   | 0            | 1         | 1         |
| Plec_j2     | 2.11538     | 1.83752   | -0.203159    | 0.147364  | 0.476     |
| Parp10_j1   | 0.682685    | 0.67047   | -0.0260455   | 0.930827  | 0.978859  |
| Parp10_j2   | 0.160196    | 0.21983   | 0.456552     | 0.405274  | 0.726998  |
| Oplah_j2    | 3.71567     | 3.51755   | 0            | 1         | 1         |
| Bop1_j6     | 0.403316    | 0.578184  | 0            | 1         | 1         |
| Bop1_j7     | 0           | 0.29462   | 0            | 1         | 1         |
| Dgat1_j2    | 0.0841168   | 0.302692  | 1.84738      | 8.21E-05  | 0.0018153 |
| Cpsf1_j5    | 2.42946     | 2.22022   | 0            | 1         | 1         |
| Recql4_j3   | 0.301103    | 0.315645  | 0.0680432    | 0.838742  | 0.948621  |
| Recql4_j4   | 0.138722    | 0.207466  | 0.580682     | 0.146223  | 0.474483  |
| Arhgap39_j3 | 0.115028    | 0.193904  | 0.753352     | 0.0606621 | 0.290288  |
| Arhgap39_j4 | 0.784323    | 0.743334  | -0.0774374   | 0.714619  | 0.896613  |
| Zfp251_j1   | 0           | 0.152813  | 0            | 1         | 1         |
| Zfp647_j1   | 0.0854128   | 0.219893  | 1.36428      | 0.0857857 | 0.357632  |
| Rbfox2_j7   | 2.35881     | 2.41536   | 0            | 1         | 1         |
| Myh9_j5     | 11.871      | 17.6545   | 0            | 1         | 1         |
| Foxred2_j2  | 0           | 0.0701452 | 1.79769e+308 | 0.0156729 | 1         |
| Pvalb_j3    | 6.24009     | 4.7902    | -0.381482    | 0.17316   | 0.510747  |
| Csf2rb2_j5  | 0.0623536   | 0.0401455 | -0.635234    | 0.574734  | 1         |
| Il2rb_j4    | 0.0123855   | 0.0906918 | 2.87232      | 0.167023  | 1         |
| Elfn2_j1    | 0.343827    | 0.547274  | 0            | 1         | 1         |
| Sox10_j4    | 16.5897     | 18.9317   | 0            | 1         | 1         |
| Baiap2l2_j3 | 0           | 0.290389  | 1.79769e+308 | 0.0039541 | 0.0425339 |
| Pla2g6_j6   | 5.45067     | 7.88091   | 0            | 1         | 1         |
| Ddx17_j7    | 0.0520506   | 0.0365033 | 0            | 1         | 1         |
| Dnalc4_j2   | 3.39928     | 3.67407   | 0            | 1         | 1         |
| Npcd_j1     | 14.5864     | 15.0595   | 0            | 1         | 1         |
| Cbx7_j1     | 4.69496     | 3.72459   | 0            | 1         | 1         |
| Pdgbf_j2    | 0.226288    | 0.417694  | 0.88429      | 0.127153  | 0.444289  |

|                  |           |           |              |           |           |
|------------------|-----------|-----------|--------------|-----------|-----------|
| Mkl1_j2          | 0.190235  | 0.764586  | 2.00689      | 2.76E-07  | 1.32E-05  |
| St13_j2          | 0         | 0.304863  | 0            | 1         | 1         |
| Rangap1_j3       | 25.8113   | 27.2671   | 0            | 1         | 1         |
| Al848285         | 0.18341   | 0.229547  | 0.323715     | 0.656862  | 0.869092  |
| Tcf20_j4         | 0.315417  | 0.718952  | 0            | 1         | 1         |
| Nfam1_j3         | 0         | 0.109815  | 1.79769e+308 | 0.0311988 | 1         |
| Nfam1_j5         | 0         | 0.0617396 | 1.79769e+308 | 0.0575268 | 1         |
| Nfam1_j4         | 0         | 0.146474  | 1.79769e+308 | 0.0054627 | 1         |
| A4galt           | 24.431    | 28.8528   | 0            | 1         | 1         |
| Scube1_j3        | 0.17415   | 0.122666  | -0.505594    | 0.631802  | 0.856815  |
| 1810041L15Rik_j6 | 4.21181   | 4.86379   | 0            | 1         | 1         |
| Phf21b_j5        | 0.229963  | 0.217376  | -0.0812111   | 0.895799  | 0.96693   |
| Phf21b_j6        | 0         | 0.0567137 | 1.79769e+308 | 0.0573897 | 1         |
| Phf21b_j8        | 0.145539  | 0.196357  | 0.43207      | 0.603147  | 0.843262  |
| 5031439G07Rik_j3 | 0.278078  | 0.594147  | 0            | 1         | 1         |
| Celsr1_j3        | 0.458176  | 0.410468  | -0.15863     | 0.45649   | 0.759953  |
| Celsr1_j2        | 0.136949  | 0.317402  | 1.21267      | 2.43E-05  | 0.000649  |
| Cerk_j7          | 2.59786   | 1.11044   | 0            | 1         | 1         |
| Brd1_j3          | 1.47997   | 0.891057  | 0            | 1         | 1         |
| XLOC_011580      | 0.317129  | 0.211596  | 0            | 1         | 1         |
| Tubgcp6          | 3.21208   | 3.12062   | 0            | 1         | 1         |
| Mapk12_j1        | 18.0411   | 16.4931   | -0.129431    | 0.355064  | 0.691033  |
| Mapk12_j2        | 8.82483   | 6.82023   | -0.371749    | 0.0254463 | 0.16635   |
| Plxb2_j3         | 1.69962   | 2.93758   | 0            | 1         | 1         |
| Fam116b_j4       | 3.39314   | 3.33677   | 0            | 1         | 1         |
| Sbf1_j3          | 0.68068   | 1.30008   | 0            | 1         | 1         |
| Sbf1_j5          | 0.776571  | 0.768452  | 0            | 1         | 1         |
| Sbf1_j4          | 3.96576   | 4.34651   | 0            | 1         | 1         |
| Cpt1b_j11        | 0.0986224 | 0.129364  | 0.391447     | 0.575068  | 1         |
| Arsa_j1          | 2.74077   | 2.44561   | -0.164386    | 0.286853  | 0.635459  |
| Kif21a_j4        | 63.3751   | 25.2302   | 0            | 1         | 1         |
| Kif21a_j5        | 20.0418   | 19.1584   | 0            | 1         | 1         |
| Prickle1_j4      | 0         | 0.239962  | 1.79769e+308 | 0.0001386 | 0.0028124 |
| Adamts20_j5      | 0.636333  | 0.69758   | 0.132576     | 0.69125   | 0.885697  |
| Adamts20_j6      | 0.0193173 | 0.102209  | 2.40356      | 0.0178924 | 1         |
| Adamts20_j12     | 0.0444588 | 0.0875824 | 0.978171     | 0.336611  | 1         |
| Adamts20_j13     | 0.21678   | 0.226633  | 0.0641257    | 0.886805  | 0.964085  |
| Adamts20_j16     | 0.0650536 | 0.0648287 | -0.00499555  | 0.996725  | 1         |
| Slc38a2_j7       | 3.84775   | 3.77278   | 0            | 1         | 1         |
| Rpap3_j1         | 0.153169  | 0.105785  | -0.533988    | 0.383603  | 0.71313   |
| Rapgef3_j6       | 0.0514781 | 0.177347  | 1.78454      | 0.0355452 | 0.207747  |
| Hdac7_j4         | 1.19296   | 1.90155   | 0            | 1         | 1         |
| Adcy6_j2         | 0.696274  | 0.706378  | 0.0207842    | 0.952498  | 0.986299  |
| Adcy6_j3         | 0.286223  | 0.474576  | 0.729502     | 0.10025   | 0.391937  |
| Arf3_j3          | 100.762   | 84.1578   | 0            | 1         | 1         |
| Prkag1_j2        | 0.218149  | 0.24916   | 0.191755     | 0.799509  | 0.933125  |
| Mll2_j1          | 1.72236   | 1.36215   | -0.338507    | 0.0123626 | 0.100353  |

|                   |           |           |              |           |          |
|-------------------|-----------|-----------|--------------|-----------|----------|
| Rhebl1_j1         | 4.04899   | 3.86204   | 0            | 1         | 1        |
| Rhebl1_j2         | 1.82883   | 1.76099   | 0            | 1         | 1        |
| Mcrs1_j7          | 2.02838   | 2.66738   | 0.395098     | 0.170281  | 0.507195 |
| Fam186b_j1        | 0.101964  | 0.109993  | 0.109356     | 0.874674  | 1        |
| Fmnl3_j6          | 0.23132   | 0.302892  | 0.388912     | 0.357157  | 0.693052 |
| Nckap5l_j8        | 0.406797  | 0.6472    | 0            | 1         | 1        |
| Racgap1_j7        | 1.81698   | 1.95701   | 0.107106     | 0.684295  | 0.881982 |
| Lass5_j5          | 4.69999   | 5.22879   | 0            | 1         | 1        |
| Lima1_j1          | 0.151446  | 0.33166   | 0            | 1         | 1        |
| Slc11a2_j6        | 0.0697216 | 0.3003    | 0            | 1         | 1        |
| Tcfcp2_j3         | 0         | 0.250319  | 0            | 1         | 1        |
| Pou6f1_j5         | 0.0839456 | 0.212294  | 0            | 1         | 1        |
| AK021197_j2       | 0.0683202 | 0.115971  | 0.763382     | 0.565444  | 1        |
| BC141885_j4       | 0.0354228 | 0.218476  | 2.62472      | 0.0306839 | 0.188573 |
| Galnt6_j1         | 0.390504  | 0.703648  | 0            | 1         | 1        |
| XLOC_011668       | 0.0288672 | 0.114999  | 0            | 1         | 1        |
| AK039268_j2       | 0.22137   | 0.12997   | -0.768273    | 0.358391  | 0.693844 |
| AK039268_j3       | 0.125762  | 0.138993  | 0.144316     | 0.788948  | 1        |
| Krt80             | 0.108542  | 0.111405  | 0.0375642    | 0.960885  | 1        |
| Krt1_j2           | 0.483495  | 0.460253  | -0.0710711   | 0.901956  | 0.968734 |
| Spryd3_j5         | 0.334096  | 2.44983   | 0            | 1         | 1        |
| Csad_j3           | 0.55322   | 0.449391  | 0            | 1         | 1        |
| Rarg_j2           | 1.97703   | 3.11702   | 0            | 1         | 1        |
| Map3k12           | 0.620911  | 0.548066  | 0            | 1         | 1        |
| Atf7_j1           | 0.022426  | 0.0595364 | 1.4086       | 0.0547255 | 1        |
| D930007P13Rik_j1  | 0.153537  | 0.0788417 | -0.96156     | 0.0367474 | 0.212043 |
| Zfp385a_j3        | 0.743551  | 1.29933   | 0            | 1         | 1        |
| Itga5_j3          | 0.1576    | 0.236629  | 0            | 1         | 1        |
| Ppp1r1a_j2        | 26.5803   | 24.631    | -0.109884    | 0.447738  | 0.754472 |
| Prkaa1_j1         | 1.26022   | 1.07898   | -0.224008    | 0.54431   | 0.811356 |
| Prkaa1_j2         | 0.347565  | 0.287373  | -0.274361    | 0.708617  | 0.893803 |
| Ttc33_j1          | 15.7126   | 15.3432   | 0            | 1         | 1        |
| Dab2_j4           | 1.17167   | 0.907935  | 0            | 1         | 1        |
| Fyb_j3            | 0.0988106 | 0.676175  | 2.77466      | 4.14E-10  | 3.69E-08 |
| Fyb_j7            | 0.180885  | 0.346375  | 0.937266     | 0.123958  | 0.438661 |
| 2410089E03Rik_j13 | 0.106877  | 0.05286   | -1.0157      | 0.479738  | 1        |
| 2410089E03Rik_j18 | 3.89404   | 3.77167   | -0.0460632   | 0.8099    | 0.937853 |
| XLOC_010947       | 0.0582221 | 0.101983  | 0.808686     | 0.276033  | 1        |
| 1110020G09Rik_j1  | 0.699242  | 0.484285  | -0.529934    | 0.305549  | 0.650748 |
| 1110020G09Rik_j4  | 0         | 0.12019   | 1.79769e+308 | 0.0232106 | 1        |
| Prlr_j2           | 0.0564286 | 0.0407265 | -0.470459    | 0.805906  | 1        |
| Rad1_j2           | 0.429695  | 0.42179   | -0.0267895   | 0.968372  | 0.991049 |
| Drosha_j4         | 0.077915  | 0.115274  | 0            | 1         | 1        |
| Cdh9_j2           | 0         | 0.159065  | 0            | 1         | 1        |
| Cdh12_j3          | 0.342868  | 0.194653  | -0.816749    | 0.0838309 | 0.353091 |
| Myo10_j7          | 2.33212   | 1.73453   | 0            | 1         | 1        |
| Fam134b           | 4.38387   | 6.9964    | 0            | 1         | 1        |

|               |            |                        |            |           |           |
|---------------|------------|------------------------|------------|-----------|-----------|
| XLOC_010973   | 0.217393   | 0.247055               | 0.184529   | 0.800139  | 0.933377  |
| XLOC_010975   | 0.0621961  | 0.0805805              | 0.373608   | 0.69389   | 1         |
| Ctnnd2_j4     | 0.0791856  | 0.0273828              | 0          | 1         | 1         |
| Cmb1_j4       | 1.90093    | 2.07747                | 0.128124   | 0.769738  | 0.921491  |
| Sema5a_j3     | 0.129701   | 0.163564               | 0.334672   | 0.415645  | 0.733384  |
| XLOC_010981   | 0.0954051  | 0.202438               | 1.08534    | 0.445948  | 0.753304  |
| Laptm4b       | 2.16457    | 2.55475                | 0          | 1         | 1         |
| Osr2_j1       | 0.0879014  | 0.135422               | 0.623507   | 0.581512  | 1         |
| XLOC_010995   | 0          | 0.0841804 1.79769e+308 |            | 0.0940538 | 1         |
| Atp6v1c1_j1   | 19.7563    | 21.8922                | 0.148108   | 0.271607  | 0.620436  |
| Rims2_j13     | 0.588262   | 1.05295                | 0.8399     | 0.0004042 | 0.0068326 |
| XLOC_011007   | 0          | 0.0511875 1.79769e+308 |            | 0.138815  | 1         |
| XLOC_011007   | 0          | 0.0914701 1.79769e+308 |            | 0.0697964 | 1         |
| Oxr1_j5       | 7.64139    | 4.28782                | -0.833589  | 2.22E-09  | 1.76E-07  |
| Oxr1          | 35.0168    | 25.3226                | -0.467621  | 1.99E-06  | 7.56E-05  |
| Med30_j2      | 5.90619    | 5.11259                | -0.208173  | 0.47272   | 0.769673  |
| Mal2_j3       | 43.1406    | 41.4657                | -0.0571293 | 0.53841   | 0.807898  |
| Mtbp_j1       | 0          | 0.0512789              | 0          | 1         | 1         |
| Mtbp_j3       | 0.141921   | 0.185827               | 0          | 1         | 1         |
| Mtbp_j4       | 0.317232   | 0.283475               | 0          | 1         | 1         |
| Zhx2_j3       | 0.0353009  | 0.4946                 | 0          | 1         | 1         |
| Wdr67_j1      | 0.164865   | 0.123747               | -0.413893  | 0.570708  | 0.826452  |
| Wdr67_j14     | 0.515774   | 0.264943               | -0.961058  | 0.271013  | 0.620042  |
| D15Ert621e_j2 | 4.39227    | 3.88668                | 0          | 1         | 1         |
| Fer1l6_j1     | 0          | 0.161738 1.79769e+308  |            | 0.0038001 | 0.0413654 |
| Gm5045        | 3.92967    | 4.47361                | 0.187031   | 0.353672  | 0.68999   |
| Pvt1          | 0.445607   | 0.494041               | 0.148857   | 0.667396  | 0.8742    |
| Pvt1_j10      | 2.08364    | 1.99877                | -0.0599952 | 0.79328   | 0.931082  |
| Pvt1_j11      | 0          | 0.324437 1.79769e+308  |            | 8.04E-06  | 0.0002558 |
| Efr3a_j1      | 0          | 0.141283               | 0          | 1         | 1         |
| Phf20l1_j7    | 1.34909    | 1.38657                | 0          | 1         | 1         |
| Khdrbs3_j5    | 0.129905   | 0.323921               | 0          | 1         | 1         |
| Khdrbs3_j6    | 3.90264    | 4.52429                | 0          | 1         | 1         |
| mKIAA0870_j4  | 0.00043581 | 0.124203               | 8.15478    | 0.738646  | 1         |
| mKIAA0870_j7  | 0.119946   | 0.147458               | 0.297914   | 0.705545  | 1         |
| Bai1_j7       | 0          | 0.126632 1.79769e+308  |            | 0.0466465 | 1         |
| AK171817_j1   | 0.138224   | 0.284968               | 1.0438     | 0.126613  | 0.443067  |
| Gsdmd_j3      | 0          | 0.200335 1.79769e+308  |            | 0.0557016 | 0.275842  |
| Zfp623_j1     | 0.205878   | 0.317837               | 0.626495   | 0.288652  | 0.636345  |
| Zfp623_j3     | 1.40348    | 2.02093                | 0.526005   | 0.0242381 | 0.160803  |
| XLOC_011080   | 0.141441   | 0.239931               | 0.762421   | 0.454219  | 0.758572  |
| XLOC_011081   | 0.165476   | 0.220133               | 0          | 1         | 1         |
| XLOC_011081   | 0.161215   | 0.132707               | 0          | 1         | 1         |
| Cyc1_j1       | 78.2559    | 67.3278                | 0          | 1         | 1         |
| Maf1_j2       | 13.8332    | 15.551                 | 0          | 1         | 1         |
| XLOC_011089   | 0.0234502  | 0.0919344              | 1.971      | 0.251935  | 1         |
| Adck5_j1      | 1.75492    | 1.83559                | 0          | 1         | 1         |



|                  |           |           |              |           |           |
|------------------|-----------|-----------|--------------|-----------|-----------|
| Ppp1r16a_j4      | 6.20673   | 6.32865   | 0.0280649    | 0.813068  | 0.938885  |
| Ppp1r16a_j6      | 0.766632  | 0.723709  | -0.0831261   | 0.747084  | 0.911894  |
| 1110038F14Rik_j1 | 0.403051  | 0.348795  | -0.208583    | 0.804371  | 0.935135  |
| XLOC_011105      | 0.137771  | 0.0938357 | -0.554065    | 0.66781   | 0.87439   |
| Csf2rb_j3        | 0.0682744 | 0.0867058 | 0.344784     | 0.662484  | 1         |
| Lgals1_j4        | 171.235   | 333.038   | 0.959711     | 0         | 0         |
| Triobp_j4        | 0         | 0.0518035 | 1.79769e+308 | 0.0128892 | 1         |
| Gm10863_j3       | 0.392643  | 0.323659  | -0.278743    | 0.416426  | 0.733896  |
| Tomm22_j1        | 20.8884   | 24.026    | 0.201896     | 0.0967433 | 0.384126  |
| XLOC_011139      | 0.0296207 | 0.24096   | 3.02412      | 0.0213948 | 0.147482  |
| XLOC_011139      | 0.540488  | 0.608927  | 0.172008     | 0.701116  | 0.890145  |
| Cacna1i_j10      | 0         | 0.234499  | 1.79769e+308 | 2.82E-05  | 0.0007333 |
| Sgsm3_j1         | 0.0656866 | 0.0400245 | -0.714715    | 0.596863  | 1         |
| Sgsm3_j2         | 1.90731   | 1.77405   | -0.104492    | 0.681826  | 0.880565  |
| Xpnpep3_j1       | 0         | 0.270696  | 0            | 1         | 1         |
| Xpnpep3_j2       | 1.25852   | 1.39729   | 0            | 1         | 1         |
| Tef_j5           | 14.7353   | 16.4101   | 0.155301     | 0.125886  | 0.441826  |
| Mei1_j1          | 0.0605107 | 0.14322   | 1.24297      | 0.457339  | 1         |
| Sept3_j4         | 2.71271   | 2.95368   | 0.12278      | 0.472195  | 0.769302  |
| Sept3_j5         | 9.28519   | 9.62086   | 0.0512337    | 0.742948  | 0.909993  |
| AK080278_j2      | 0.190017  | 0.299867  | 0            | 1         | 1         |
| XLOC_011175      | 0.549891  | 0.475459  | 0            | 1         | 1         |
| Mpped1_j2        | 0.126879  | 0.232509  | 0.873834     | 0.1364    | 0.459374  |
| Nup50_j1         | 8.32227   | 8.70423   | 0.0647398    | 0.5422    | 0.810033  |
| XLOC_011191      | 7.35E-05  | 0.143951  | 10.935       | 0.936845  | 1         |
| Ppara_j4         | 0.0654697 | 0.109992  | 0.748492     | 0.567408  | 1         |
| Tbc1d22a_j5      | 0.248053  | 0.177074  | -0.486295    | 0.575812  | 0.828497  |
| Tbc1d22a_j11     | 0.0723835 | 0.0876173 | 0.275555     | 0.854842  | 1         |
| XLOC_011198      | 0.120778  | 0.14578   | 0.271433     | 0.767628  | 1         |
| Pim3_j2          | 0.595747  | 0.942882  | 0.662377     | 0.198678  | 0.541904  |
| Ppp6r2_j1        | 0.700338  | 1.06815   | 0            | 1         | 1         |
| Ncaph2           | 0.63761   | 0.621309  | 0            | 1         | 1         |
| Ncaph2_j4        | 0.0686928 | 0.199581  | 0            | 1         | 1         |
| Mapk8ip2_j4      | 84.625    | 79.8843   | 0            | 1         | 1         |
| Shank3_j5        | 0         | 0.0538716 | 1.79769e+308 | 0.164617  | 1         |
| Shank3_j10       | 0.563463  | 0.497555  | -0.179464    | 0.552857  | 0.81679   |
| Shank3_j12       | 2.3502    | 2.55874   | 0.122648     | 0.553258  | 0.817109  |
| Lrrk2_j1         | 0.104164  | 0.15727   | 0.594391     | 0.204125  | 0.548338  |
| Cntn1_j5         | 40.1085   | 39.8502   | 0            | 1         | 1         |
| XLOC_011225      | 0.125558  | 0.245725  | 0.968693     | 0.342428  | 0.68221   |
| Pphln1_j4        | 0         | 0.225696  | 0            | 1         | 1         |
| Pphln1_j5        | 1.45125   | 1.03434   | 0            | 1         | 1         |
| Pfkm_j1          | 23.3669   | 27.4653   | 0            | 1         | 1         |
| Ccdc65_j5        | 0.389778  | 0.487176  | 0.321793     | 0.464191  | 0.764606  |
| Prph             | 0.0577599 | 0.0370939 | 0            | 1         | 1         |
| Prph_j9          | 33.9998   | 30.7856   | 0            | 1         | 1         |
| Spats2_j1        | 5.49978   | 5.78598   | 0            | 1         | 1         |

|               |            |           |              |           |           |
|---------------|------------|-----------|--------------|-----------|-----------|
| Spats2_j5     | 5.47571    | 5.05379   | 0            | 1         | 1         |
| AK007210_j1   | 0.186049   | 0.187008  | 0.00742256   | 0.989203  | 0.996607  |
| Prpf40b_j9    | 4.25949    | 3.90168   | -0.126583    | 0.445007  | 0.752703  |
| Tmbim6_j3     | 8.77546    | 26.4747   | 0            | 1         | 1         |
| XLOC_011260   | 0.0237453  | 0.105073  | 2.14568      | 0.215884  | 1         |
| Smarcd1_j3    | 0          | 0.0487419 | 1.79769e+308 | 0.0178836 | 1         |
| Larp4_j6      | 1.4661     | 2.3141    | 0.658465     | 1         | 1         |
| Dip2b_j5      | 0          | 0.687667  | 0            | 1         | 1         |
| Mettl7a1_j2   | 7.09456    | 13.2838   | 0            | 1         | 1         |
| Mettl7a2      | 23.2762    | 43.1471   | 0            | 1         | 1         |
| Dazap2_j1     | 0.355148   | 0.419172  | 0            | 1         | 1         |
| Slc4a8_j2     | 0.0919456  | 1.20828   | 0            | 1         | 1         |
| XLOC_011277   | 0.0744139  | 0.0905013 | 0.282367     | 0.824283  | 1         |
| Eif4b_j1      | 0          | 0.23867   | 0            | 1         | 1         |
| Soat2_j1      | 0.101381   | 0.292193  | 1.52714      | 0.0408771 | 0.227101  |
| Zfp740_j6     | 0.816369   | 1.02765   | 0            | 1         | 1         |
| Espl1_j9      | 0.208504   | 0.321617  | 0.625269     | 0.540908  | 0.809097  |
| Amhr2_j4      | 0.088446   | 0.0518288 | -0.771043    | 0.714926  | 1         |
| Pcbp2_j4      | 1.97639    | 1.84544   | -0.0989056   | 0.546453  | 0.81297   |
| Tarbp2_j2     | 0.0916329  | 0.255469  | 1.47921      | 0.107529  | 0.407699  |
| Tarbp2_j1     | 0          | 0.0708813 | 1.79769e+308 | 0.101091  | 1         |
| Hoxc11_j3     | 0.0721374  | 0.43665   | 2.59766      | 0.0100515 | 0.0858546 |
| Hoxc4_j1      | 0.496764   | 0.74133   | 0            | 1         | 1         |
| Hoxc5         | 0.271924   | 0.441298  | 0            | 1         | 1         |
| XLOC_011305   | 0.438838   | 0.37911   | -0.211072    | 0.479565  | 0.773715  |
| Hnrnpa1_j2    | 4.62184    | 5.02257   | 0.119957     | 0.495045  | 0.782733  |
| Pde1b         | 0.595391   | 0.473594  | -0.330187    | 0.313739  | 0.658038  |
| Skp2          | 0.00636136 | 0.126575  | 4.31451      | 0.21686   | 1         |
| Dnajc21_j3    | 0.17865    | 0.80747   | 0            | 1         | 1         |
| Rai14_j4      | 0          | 0.095164  | 0            | 1         | 1         |
| 6030458C11Rik | 0.3276     | 0.332231  | 0            | 1         | 1         |
| XLOC_011345   | 0.116906   | 0.337837  | 1.53098      | 0.169791  | 0.506768  |
| Fam105a_j2    | 0.0613391  | 0.114552  | 0.901128     | 0.446542  | 1         |
| Trio_j7       | 5.09398    | 4.49531   | 0            | 1         | 1         |
| Trio_j8       | 0.813639   | 0.608107  | 0            | 1         | 1         |
| Ropn1_j2      | 0          | 0.206063  | 1.79769e+308 | 0.044534  | 0.240823  |
| March6_j2     | 12.3794    | 14.3569   | 0            | 1         | 1         |
| Ankrd46_j1    | 1.2645     | 1.47176   | 0            | 1         | 1         |
| Snx31_j1      | 0.0844976  | 0.0561345 | -0.590022    | 0.681937  | 1         |
| XLOC_011367   | 0.111626   | 0.0677959 | -0.719407    | 0.568264  | 1         |
| Ncald_j1      | 0          | 0.774021  | 0            | 1         | 1         |
| Ubr5          | 2.03206    | 2.15607   | 0            | 1         | 1         |
| XLOC_011378   | 0          | 0.134792  | 1.79769e+308 | 0.0465812 | 1         |
| Slc25a32      | 2.18239    | 2.14229   | 0            | 1         | 1         |
| XLOC_011380   | 0.448195   | 0.465616  | 0.0550135    | 0.887723  | 0.964522  |
| Dpys_j3       | 0.0513072  | 0.146686  | 1.5155       | 0.31666   | 1         |
| Nudcd1_j1     | 1.86501    | 1.70103   | 0            | 1         | 1         |

|              |             |           |              |           |           |
|--------------|-------------|-----------|--------------|-----------|-----------|
| Sybu_j4      | 0.419368    | 0.447513  | 0            | 1         | 1         |
| Csmd3_j2     | 0.157522    | 0.190488  | 0.274146     | 0.686421  | 0.883186  |
| Eif3h_j2     | 15.1348     | 14.46     | -0.0657969   | 0.679291  | 0.879479  |
| Enpp2_j1     | 0           | 0.054704  | 1.79769e+308 | 0.0602313 | 1         |
| Enpp2_j2     | 0.00605642  | 0.544654  | 6.49073      | 0.0065844 | 0.0627764 |
| XLOC_011407  | 0           | 0.106395  | 1.79769e+308 | 0.027761  | 1         |
| XLOC_011407  | 0.0530018   | 0.118433  | 1.15996      | 0.228889  | 1         |
| Tmem65_j1    | 14.5283     | 19.6151   | 0            | 1         | 1         |
| Mtss1_j2     | 8.00501     | 9.95625   | 0.314698     | 0.0142436 | 0.110857  |
| Fam49b_j2    | 0.34013     | 0.18512   | 0            | 1         | 1         |
| Asap1_j5     | 1.67479     | 4.05172   | 0            | 1         | 1         |
| Asap1_j8     | 3.30349     | 2.37044   | 0            | 1         | 1         |
| Lrrc6_j2     | 0           | 0.0839479 | 1.79769e+308 | 0.0579319 | 1         |
| Ndr1_j5      | 25.2151     | 42.3408   | 0            | 1         | 1         |
| Zfat_j7      | 0.057265    | 0.302293  | 2.40022      | 0.0002383 | 0.004434  |
| XLOC_011435  | 0           | 0.074031  | 1.79769e+308 | 0.106475  | 1         |
| Ptk2_j5      | 2.74801     | 3.30141   | 0            | 1         | 1         |
| Ptk2_j6      | 1.92299     | 3.46114   | 0            | 1         | 1         |
| Slc45a4_j3   | 1.38815     | 1.06664   | 0            | 1         | 1         |
| Gml_j1       | 0.062957    | 0.150902  | 1.26117      | 0.46697   | 1         |
| Ly6a_j1      | 0           | 0.345985  | 0            | 1         | 1         |
| Ly6c1_j5     | 3.22307     | 4.23176   | 0            | 1         | 1         |
| Ly6c1_j6     | 0.655541    | 0.835753  | 0            | 1         | 1         |
| Zc3h3_j6     | 0.842746    | 1.18021   | 0.485871     | 0.352159  | 0.689187  |
| Scrib_j4     | 0           | 0.472408  | 0            | 1         | 1         |
| Scrib_j5     | 0.0605238   | 0.124055  | 0            | 1         | 1         |
| Puf60_j3     | 9.62852     | 17.6205   | 0            | 1         | 1         |
| Bop1_j1      | 0           | 0.0695271 | 0            | 1         | 1         |
| Dgat         | 6.87465     | 9.21836   | 0.423222     | 0.0421969 | 0.232106  |
| Fbxl6_j1     | 1.53397     | 1.93225   | 0.333016     | 0.181502  | 0.521516  |
| Cpsf1_j6     | 0.322858    | 0.720023  | 0            | 1         | 1         |
| Cpsf1_j8     | 0.804688    | 0.682946  | 0            | 1         | 1         |
| Vps28_j4     | 0.94829     | 0.598575  | -0.663796    | 0.191566  | 0.533749  |
| Recql4_j2    | 0.225236    | 0.253839  | 0.172479     | 0.644411  | 0.862845  |
| Arhgap39_j6  | 0           | 0.22246   | 1.79769e+308 | 3.16E-07  | 1.49E-05  |
| Arhgap39_j12 | 0.207185    | 0.323827  | 0.644302     | 0.184238  | 0.524798  |
| Rbfox2_j1    | 12.5378     | 13.4408   | 0            | 1         | 1         |
| Rbfox2_j2    | 0.828394    | 0.990825  | 0            | 1         | 1         |
| Rbfox2_j3    | 4.24082     | 3.43201   | 0            | 1         | 1         |
| Apol9a       | 0.000145978 | 0.134169  | 9.84409      | 0.908637  | 1         |
| Apol9a_j3    | 0           | 0.158954  | 1.79769e+308 | 0.0227428 | 0.153986  |
| Apol10b      | 0.0707256   | 0.153354  | 1.11656      | 0.241016  | 1         |
| Eif3d_j4     | 0           | 1.02641   | 0            | 1         | 1         |
| Cacng2_j1    | 0.658677    | 0.394838  | -0.73831     | 0.0319924 | 0.193948  |
| Tmprss6_j7   | 0.0388405   | 0.106095  | 1.44973      | 0.352376  | 1         |
| C1qtnf6_j3   | 0.0454555   | 0.0889977 | 0.969313     | 0.361475  | 1         |
| C1qtnf6_j4   | 0           | 0.0503699 | 1.79769e+308 | 0.0733345 | 1         |

|                   |             |           |              |           |          |
|-------------------|-------------|-----------|--------------|-----------|----------|
| Card10_j3         | 0.675058    | 1.00293   | 0            | 1         | 1        |
| Card10_j4         | 0.541804    | 0.816088  | 0            | 1         | 1        |
| Lgals2_j2         | 0.220012    | 0.381672  | 0.794748     | 0.1698    | 0.506768 |
| Ankrd54_j2        | 0.30627     | 0.314145  | 0.0366282    | 0.952131  | 0.986165 |
| 1700088E04Rik_j3  | 1.27686     | 1.208     | 0            | 1         | 1        |
| Baiap2l2_j1       | 0.103973    | 0.0283183 | -1.8764      | 0.48397   | 1        |
| Baiap2l2_j5       | 0.126564    | 0.277759  | 1.13397      | 0.439867  | 0.749306 |
| Tmem184b_j3       | 0           | 0.0733568 | 0            | 1         | 1        |
| 4933432B09Rik_j10 | 0.116475    | 0.0987377 | -0.238353    | 0.807502  | 1        |
| Sun2_j1           | 1.35014     | 2.10401   | 0            | 1         | 1        |
| Cbx7_j4           | 0.999902    | 1.11234   | 0            | 1         | 1        |
| Pdgbf_j1          | 0           | 0.113893  | 1.79769e+308 | 0.0422045 | 1        |
| St13_j1           | 1.89741     | 1.7475    | 0            | 1         | 1        |
| Rangap1_j6        | 0.168787    | 0.175658  | 0            | 1         | 1        |
| Pppde2_j1         | 2.77842     | 4.58322   | 0            | 1         | 1        |
| Nhp2l1_j3         | 16.6557     | 18.6864   | 0            | 1         | 1        |
| Tnfrsf13c         | 0.0296256   | 0.08786   | 1.56836      | 0.334456  | 1        |
| Cenpm             | 0.0582177   | 0.0649642 | 0.158186     | 0.899889  | 1        |
| Naga_j1           | 3.59163     | 4.36239   | 0.280481     | 0.242991  | 0.59044  |
| Naga_j3           | 0.946718    | 0.607288  | -0.640554    | 0.102239  | 0.396277 |
| Cyp2d22_j2        | 0.304297    | 0.501996  | 0.722196     | 0.10283   | 0.39727  |
| Cyp2d22_j1        | 0.428332    | 0.451602  | 0.0763235    | 0.861752  | 0.956305 |
| Nfam1_j2          | 4.40E-05    | 0.263625  | 12.5485      | 0.948196  | 0.984985 |
| Pacsin2_j3        | 5.0408      | 2.85859   | 0            | 1         | 1        |
| Pacsin2_j4        | 0.451297    | 8.9268    | 0            | 1         | 1        |
| Mcat_j4           | 0.000429477 | 0.444033  | 0            | 1         | 1        |
| Scube1_j1         | 0.0155372   | 0.138279  | 3.15378      | 0.0592184 | 1        |
| Scube1_j2         | 5.01E-05    | 0.0968085 | 10.9158      | 0.945457  | 1        |
| Sult4a1_j5        | 0.113035    | 0.121606  | 0            | 1         | 1        |
| Phf21b_j1         | 0.151993    | 0.267546  | 0.815784     | 0.182829  | 0.523288 |
| 5031439G07Rik_j1  | 0.49839     | 0.624609  | 0            | 1         | 1        |
| Cerk_j3           | 12.3629     | 11.9283   | 0            | 1         | 1        |
| Brd1_j7           | 0.31397     | 0.177974  | 0            | 1         | 1        |
| Plxb2_j4          | 0.751683    | 0.68175   | 0            | 1         | 1        |
| Fam116b_j5        | 0.550255    | 0.798556  | 0            | 1         | 1        |
| Sbf1_j9           | 6.68267     | 10.0969   | 0            | 1         | 1        |
| Lmf2_j4           | 0.260816    | 0.474784  | 0            | 1         | 1        |
| Odf3b_j1          | 0.031994    | 0.109004  | 1.76851      | 0.248385  | 1        |
| Cpt1b_j1          | 0.0801727   | 0.271037  | 1.75731      | 0.034854  | 0.205078 |
| Chkb_j3           | 1.54177     | 1.8039    | 0            | 1         | 1        |
| Cpne8_j3          | 0.927283    | 1.30648   | 0.494602     | 0.0883952 | 0.364201 |
| Kif21a_j7         | 24.7673     | 30.1378   | 0            | 1         | 1        |
| Kif21a_j8         | 14.1395     | 14.9883   | 0            | 1         | 1        |
| Zcrb1_j1          | 21.9759     | 21.3139   | 0            | 1         | 1        |
| Zcrb1_j2          | 8.47887     | 10.4184   | 0            | 1         | 1        |
| Prickle1_j3       | 4.16E-05    | 0.11722   | 11.4605      | 0.919615  | 1        |
| Dbx2_j4           | 5.63E-05    | 0.118442  | 11.0383      | 0.974526  | 1        |

|                  |           |           |               |           |           |
|------------------|-----------|-----------|---------------|-----------|-----------|
| Dbx2_j5          | 0         | 0.175152  | 1.79769e+308  | 0.0394689 | 0.222024  |
| Scaf11_j5        | 0.360592  | 0.14531   | -1.31124      | 0.0021418 | 0.0263255 |
| Slc38a2_j6       | 14.2522   | 16.0614   | 0             | 1         | 1         |
| Slc38a2_j8       | 3.33624   | 2.85058   | 0             | 1         | 1         |
| Amigo2_j1        | 1.94311   | 2.47586   | 0             | 1         | 1         |
| Rapegef3_j5      | 0         | 0.20444   | 1.79769e+308  | 0.0009143 | 0.0133146 |
| Hdac7_j1         | 0.0724139 | 0.0817945 | 0             | 1         | 1         |
| Zfp641_j4        | 0.0543723 | 0         | -1.79769e+308 | 0.0035734 | 1         |
| Zfp641_j3        | 0         | 0.0922627 | 1.79769e+308  | 0.0046988 | 1         |
| 2310037124Rik_j9 | 8.8941    | 9.95512   | 0.162589      | 0.284136  | 0.63283   |
| Adcy6_j7         | 0.133405  | 0.107563  | -0.310635     | 0.79208   | 1         |
| Adcy6_j9         | 0         | 0.0545184 | 1.79769e+308  | 0.0486228 | 1         |
| Adcy6_j14        | 0.177321  | 0.625959  | 1.81971       | 0.0005835 | 0.0092671 |
| Ddx23_j2         | 0.449559  | 0.688091  | 0.614088      | 0.0025257 | 0.0300979 |
| Ddx23_j3         | 0.137266  | 0.113955  | -0.268509     | 0.505583  | 0.78837   |
| Arf3_j1          | 0         | 0.726503  | 0             | 1         | 1         |
| Prkag1_j5        | 0.321293  | 0.257824  | -0.317502     | 0.635166  | 0.858486  |
| Mll2_j8          | 0.0499748 | 0.0673433 | 0.430333      | 0.850841  | 1         |
| Rhebl1_j6        | 0.132944  | 0.121235  | 0             | 1         | 1         |
| Rhebl1_j7        | 0.0247819 | 0.0661834 | 0             | 1         | 1         |
| Lmbr1_j1         | 0.0662987 | 0.584716  | 0             | 1         | 1         |
| Mcrs1_j6         | 0.194806  | 0.196901  | 0.0154276     | 0.979521  | 0.994006  |
| Fmn13_j4         | 0.636737  | 1.06371   | 0.740335      | 0.0745918 | 0.329477  |
| Fmn13            | 0.138649  | 0.380483  | 1.4564        | 0.0017615 | 0.0225822 |
| Fmn13_j5         | 0.0536798 | 0.170154  | 1.66439       | 0.0215194 | 0.148188  |
| Nckap5l_j6       | 0.363422  | 0.629151  | 0             | 1         | 1         |
| Lass5_j4         | 0.0501303 | 0         | 0             | 1         | 1         |
| Lima1_j3         | 1.55172   | 1.98239   | 0             | 1         | 1         |
| Slc11a2_j4       | 0.63386   | 0.465448  | 0             | 1         | 1         |
| AK021197         | 0.394323  | 0.427678  | 0.117147      | 0.780302  | 0.925835  |
| BC141885_j1      | 0.0929242 | 0.233043  | 1.32647       | 0.060329  | 0.289376  |
| Krt80            | 1.12E-05  | 0.187316  | 14.032        | 0.977208  | 0.993353  |
| Spryd3_j1        | 4.72339   | 16.509    | 0             | 1         | 1         |
| Csad_j2          | 5.77736   | 5.5849    | 0             | 1         | 1         |
| Itgb7_j3         | 0.300644  | 0.296255  | 0             | 1         | 1         |
| Rarg_j6          | 0         | 0.957896  | 0             | 1         | 1         |
| Smug1_j1         | 0.437228  | 0.605527  | 0.469805      | 0.163265  | 0.498589  |
| Zfp385a_j4       | 1.52483   | 1.66049   | 0             | 1         | 1         |
| Itga5_j6         | 0.157137  | 0.494294  | 0             | 1         | 1         |
| Ppp1r1a_j3       | 0.754447  | 0.553028  | -0.448068     | 0.572613  | 0.827161  |
| Zfp263           | 1.6992    | 1.95228   | 0.200304      | 0.304404  | 0.650023  |
| Zfp263           | 1.73205   | 1.52217   | -0.186352     | 0.452753  | 0.757765  |
| Zfp174           | 0.380463  | 0.306891  | -0.310031     | 0.326243  | 0.669409  |
| Nat15_j1         | 5.40254   | 2.86249   | -0.916367     | 7.23E-06  | 0.0002336 |
| Nat15            | 21.845    | 20.3515   | -0.102169     | 0.321552  | 0.664637  |
| Dnaja3           | 1.636     | 1.68917   | 0.0461437     | 0.867889  | 0.958158  |
| Dnaja3           | 11.0129   | 11.6268   | 0.0782563     | 0.533838  | 0.805306  |

|                  |           |           |             |           |          |
|------------------|-----------|-----------|-------------|-----------|----------|
| Hmox2            | 0.293548  | 0.288772  | 0           | 1         | 1        |
| 4930562C15Rik_j1 | 0.171334  | 0.0579744 | -1.56332    | 0.0862496 | 0.358839 |
| Mgrn1_j2         | 3.46268   | 3.03655   | -0.189455   | 0.143398  | 0.470568 |
| Ubn1_j1          | 4.63112   | 6.17264   | 0           | 1         | 1        |
| Sec14I5_j6       | 0.103327  | 2.52E-05  | -12.0019    | 0.94901   | 1        |
| Sec14I5_j8       | 0.0751967 | 0.0772998 | 0.0397955   | 0.958009  | 1        |
| Alg1             | 13.3536   | 11.9797   | 0           | 1         | 1        |
| Rbfox1_j2        | 0.0501812 | 0.0891583 | 0.829222    | 0.586894  | 1        |
| Rbfox1_j7        | 0.805519  | 0.412044  | -0.967122   | 0.249082  | 0.596568 |
| Rbfox1_j14       | 3.28654   | 4.04064   | 0           | 1         | 1        |
| BC024814         | 3.8463    | 3.79935   | 0           | 1         | 1        |
| BC024814_j2      | 7.19125   | 6.00285   | 0           | 1         | 1        |
| Pmm2             | 3.80359   | 3.9696    | 0           | 1         | 1        |
| 1810013L24Rik    | 11.6193   | 12.5097   | 0.106525    | 0.234183  | 0.581627 |
| Nubp1_j3         | 0.237297  | 0.348041  | 0           | 1         | 1        |
| Clec16a_j1       | 4.29871   | 4.9049    | 0           | 1         | 1        |
| Clec16a_j5       | 0.734534  | 0.739636  | 0           | 1         | 1        |
| Clec16a_j4       | 0.847175  | 0.657734  | 0           | 1         | 1        |
| DQ072382_j1      | 0.331754  | 0.116874  | -1.50516    | 0.259666  | 0.608462 |
| DQ072382_j2      | 0.377707  | 0.412588  | 0.127433    | 0.553221  | 0.81708  |
| Snn              | 0.945449  | 0.947764  | 0.00352861  | 0.978422  | 0.993756 |
| Snx29_j2         | 0.54218   | 0.674689  | 0.31545     | 0.285383  | 0.63418  |
| Ercc4            | 3.08667   | 3.08449   | -0.00101711 | 0.99332   | 0.997985 |
| Mkl2             | 1.30253   | 0.889207  | 0           | 1         | 1        |
| Mkl2_j1          | 0.345377  | 0.537029  | 0           | 1         | 1        |
| Bfar             | 12.6262   | 13.2301   | 0.0673967   | 0.506015  | 0.788576 |
| Rrn3             | 8.51592   | 7.98988   | -0.0919874  | 0.397395  | 0.721699 |
| XLOC_012464      | 0.162633  | 0.0497396 | 0           | 1         | 1        |
| 2900011O08Rik    | 3.3698    | 2.99936   | -0.168007   | 0.216892  | 0.563076 |
| Nde1             | 3.82563   | 4.32778   | 0.177932    | 0.252406  | 0.600415 |
| Abcc1            | 2.21379   | 2.46017   | 0.152243    | 0.174582  | 0.512657 |
| Snai2_j2         | 0.0995238 | 0.0757692 | -0.393432   | 0.705318  | 1        |
| Efcab1           | 1.20667   | 1.00926   | -0.257732   | 0.30909   | 0.653841 |
| Prkdc_j1         | 0.183464  | 0.0657535 | 0           | 1         | 1        |
| Prkdc_j4         | 0.258662  | 0.075322  | 0           | 1         | 1        |
| Prkdc_j9         | 3.85694   | 3.6485    | 0           | 1         | 1        |
| Pkp2_j3          | 0.253583  | 0.295832  | 0.222323    | 0.583654  | 0.833132 |
| Pkp2             | 0.439942  | 0.333322  | -0.400395   | 0.346614  | 0.685483 |
| Pkp2_j5          | 0.363921  | 0.342297  | -0.0883795  | 0.774838  | 0.923737 |
| Top3b_j1         | 3.89664   | 4.06041   | 0.0593925   | 0.709924  | 0.894313 |
| Top3b            | 2.04281   | 1.85189   | -0.141555   | 0.520644  | 0.797932 |
| Top3b_j4         | 1.84863   | 2.57477   | 0.477984    | 0.0573729 | 0.280663 |
| Ppm1f            | 15.9998   | 15.4937   | -0.046378   | 0.614133  | 0.847685 |
| Mapk1            | 22.5637   | 21.8599   | 0           | 1         | 1        |
| Mapk1            | 0.0336305 | 0.074586  | 0           | 1         | 1        |
| Mapk1            | 0.439501  | 0.339472  | 0           | 1         | 1        |
| Ydjc             | 6.62355   | 8.49281   | 0           | 1         | 1        |

|               |           |           |               |           |           |
|---------------|-----------|-----------|---------------|-----------|-----------|
| Snap29        | 8.51821   | 9.43684   | 0.147753      | 0.153234  | 0.485466  |
| Crkl_j1       | 0.10539   | 0.207853  | 0             | 1         | 1         |
| Crkl          | 8.15373   | 7.25504   | 0             | 1         | 1         |
| Aifm3_j1      | 3.66184   | 2.14339   | -0.772678     | 0.0001625 | 0.0032264 |
| Aifm3_j4      | 0.98192   | 0.640078  | -0.617358     | 0.0905774 | 0.369629  |
| Lztr1_j2      | 1.49875   | 0         | -1.79769e+308 | 2.39E-23  | 7.27E-21  |
| Lztr1_j1      | 16.9007   | 18.8019   | 0.153794      | 0.138533  | 0.462876  |
| Lztr1_j6      | 59.4503   | 77.0219   | 0.373583      | 0.0005879 | 0.0093219 |
| P2rx6         | 4.5881    | 3.19389   | 0             | 1         | 1         |
| Smpd4         | 3.09325   | 2.44288   | 0             | 1         | 1         |
| Smpd4_j2      | 3.16202   | 2.80262   | 0             | 1         | 1         |
| Klhl22_j1     | 4.42976   | 4.34686   | 0             | 1         | 1         |
| Klhl22_j4     | 2.84152   | 2.78484   | 0             | 1         | 1         |
| Tssk1         | 0.147693  | 0.0916105 | -0.689014     | 0.278876  | 0.627636  |
| Dgcr6_j1      | 3.53997   | 3.57055   | 0.0124092     | 0.943626  | 0.983025  |
| Dgcr6         | 10.39     | 10.3237   | -0.00923604   | 0.936017  | 0.980349  |
| Rtn4r         | 1.36935   | 1.06324   | -0.365028     | 0.251976  | 0.599992  |
| Trmt2a        | 0.570748  | 0.730196  | 0.355431      | 0.124259  | 0.43928   |
| Arvcf         | 8.1767    | 8.72528   | 0             | 1         | 1         |
| Ufd1l         | 8.61071   | 8.44042   | -0.0288173    | 0.843345  | 0.950448  |
| 2510002D24Rik | 2.35312   | 2.12495   | -0.147144     | 0.515904  | 0.794623  |
| XLOC_012499   | 0.186378  | 0.226929  | 0.284007      | 0.837006  | 0.947826  |
| B3gnt5        | 0.468536  | 0.272506  | -0.781874     | 0.046555  | 0.247407  |
| B3gnt5_j2     | 0.151178  | 0         | -1.79769e+308 | 2.56E-05  | 0.0006767 |
| B3gnt5_j4     | 0.289604  | 0         | -1.79769e+308 | 1.08E-08  | 7.49E-07  |
| Klhl24        | 5.24633   | 5.88318   | 0             | 1         | 1         |
| Yeats2_j2     | 0.650249  | 0.579779  | 0             | 1         | 1         |
| Yeats2_j4     | 0.308607  | 0.0707363 | 0             | 1         | 1         |
| Eif2b5        | 17.5137   | 16.546    | 0             | 1         | 1         |
| Dvl3_j1       | 0.18612   | 0.0247512 | -2.91066      | 0.0547733 | 0.273004  |
| Dvl3_j2       | 0.164549  | 0.0919494 | -0.839605     | 0.210147  | 0.554709  |
| Ap2m1_j6      | 18.0083   | 19.6027   | 0.122391      | 0.185862  | 0.526194  |
| Ap2m1_j7      | 4.16022   | 6.63845   | 0.674186      | 1.44E-07  | 7.41E-06  |
| Abcf3         | 9.43566   | 9.15426   | -0.0436811    | 0.667378  | 0.8742    |
| Ece2_j4       | 10.7432   | 11.7696   | 0             | 1         | 1         |
| Psm2          | 0         | 0.239406  | 1.79769e+308  | 0.000933  | 0.0135229 |
| Eif4g1_j1     | 0.516305  | 0.938413  | 0             | 1         | 1         |
| Eif4g1_j7     | 0.107762  | 0.0561688 | 0             | 1         | 1         |
| Fam131a_j1    | 0.940552  | 0.979931  | 0             | 1         | 1         |
| Fam131a       | 14.9605   | 12.1544   | 0             | 1         | 1         |
| Polr2h        | 0.525474  | 0.319235  | 0             | 1         | 1         |
| Polr2h_j3     | 3.29823   | 2.51491   | 0             | 1         | 1         |
| Polr2h_j4     | 4.68425   | 5.39014   | 0             | 1         | 1         |
| Ephb3_j2      | 0.0993342 | 0.105332  | 0.0845768     | 0.919172  | 1         |
| Vps8_j2       | 0.489191  | 0         | -1.79769e+308 | 4.55E-14  | 7.89E-12  |
| Vps8_j7       | 2.24457   | 2.25522   | 0.00682599    | 0.976384  | 0.993154  |
| Map3k13_j1    | 1.06807   | 0.678108  | -0.655415     | 0.0008629 | 0.0127039 |

|                  |           |                 |             |           |           |
|------------------|-----------|-----------------|-------------|-----------|-----------|
| Senp2            | 15.9216   | 16.1696         | 0.0223013   | 0.807384  | 0.936475  |
| Dnajb11          | 19.8792   | 20.2992         | 0.030158    | 0.7716    | 0.922388  |
| Hrg_j3           | 0.0589753 | 0 -1.79769e+308 |             | 0.0830145 | 1         |
| Eif4a2_j1        | 1.32896   | 0.689404        | 0           | 1         | 1         |
| St6gal1          | 6.35072   | 5.02802         | 0           | 1         | 1         |
| AK144897_j3      | 0.130425  | 0 -1.79769e+308 |             | 0.0600451 | 1         |
| AK144897_j2      | 0.49096   | 0.438034        | -0.164562   | 0.806783  | 0.936131  |
| AK144897_j9      | 0.129279  | 0.0919246       | -0.491967   | 0.744432  | 1         |
| Rtp4_j2          | 0.431281  | 0.141319        | -1.60967    | 0.0467475 | 0.248008  |
| Rtp4_j3          | 0.381528  | 0 -1.79769e+308 |             | 0.0004834 | 0.0079174 |
| Lpp_j6           | 0.176211  | 0.167552        | -0.0726918  | 1         | 1         |
| Tprg_j2          | 0.0804716 | 0.0417851       | -0.945491   | 0.530327  | 1         |
| Trp63_j2         | 0.138033  | 0 -1.79769e+308 |             | 0.0271824 | 0.174171  |
| Il1rap           | 0.9736    | 0.971096        | -0.0037151  | 0.984606  | 0.995392  |
| Ccdc50           | 0.330041  | 0.424551        | 0           | 1         | 1         |
| Hrasls           | 0.699142  | 0.433929        | -0.688127   | 0.0829552 | 0.350926  |
| Hrasls           | 2.35891   | 1.5795          | -0.578654   | 0.0057862 | 0.05688   |
| Opa1             | 7.02159   | 6.47588         | 0           | 1         | 1         |
| Opa1_j1          | 4.14227   | 3.07784         | 0           | 1         | 1         |
| Opa1_j5          | 26.4289   | 23.9167         | 0           | 1         | 1         |
| 4632428C04Rik_j3 | 2.10248   | 0.702243        | 0           | 1         | 1         |
| Hes1             | 3.39709   | 3.38713         | -0.00423805 | 0.982227  | 0.994604  |
| Fam43a           | 2.19832   | 2.13138         | -0.0446117  | 0.785936  | 0.928311  |
| Bdh1             | 1.1151    | 1.18096         | 0.0827949   | 0.626767  | 0.854266  |
| Dlg1_j1          | 0.153787  | 0 -1.79769e+308 |             | 1.01E-05  | 0.0003111 |
| Dlg1             | 0.558798  | 0.428939        | -0.381556   | 0.269549  | 0.618722  |
| Dlg1_j7          | 0.211156  | 0.2834          | 0.424529    | 0.376908  | 0.70877   |
| Gm15703          | 4.6801    | 4.16013         | -0.16991    | 0.38687   | 0.714815  |
| Ncbp2_j1         | 10.3232   | 11.0592         | 0.099359    | 0.283461  | 0.631874  |
| 1500031L02Rik    | 17.7105   | 16.9144         | -0.0663515  | 0.52789   | 0.801781  |
| Rnf168           | 7.96005   | 7.97528         | 0.0027569   | 0.979158  | 0.993951  |
| Ubxn7            | 5.61088   | 4.79081         | -0.227958   | 0.0224168 | 0.152659  |
| Ubxn7_j1         | 0.0671664 | 0 -1.79769e+308 |             | 3.90E-05  | 1         |
| Tctex1d2         | 8.259     | 7.62847         | -0.114572   | 0.492641  | 0.781139  |
| Pcyt1a           | 2.85052   | 2.5405          | 0           | 1         | 1         |
| Pcyt1a           | 0.667407  | 0.721401        | 0           | 1         | 1         |
| Pcyt1a_j3        | 9.01028   | 10.2948         | 0           | 1         | 1         |
| Zdhhc19_j1       | 0.238169  | 0.140426        | -0.762171   | 0.189298  | 0.530986  |
| Tfrc             | 23.6606   | 16.2683         | 0           | 1         | 1         |
| Tfrc_j2          | 6.83681   | 12.6916         | 0           | 1         | 1         |
| Tnk2_j1          | 2.94671   | 1.83694         | 0           | 1         | 1         |
| Tnk2_j10         | 12.014    | 11.012          | 0           | 1         | 1         |
| Tnk2_j12         | 1.05312   | 0.55097         | 0           | 1         | 1         |
| Fyttd1           | 10.2772   | 9.11567         | -0.17303    | 0.135656  | 0.458263  |
| Lrch3            | 1.20263   | 0.746553        | 0           | 1         | 1         |
| Lrch3_j1         | 0.696031  | 0.715209        | 0           | 1         | 1         |
| Lmln             | 3.91258   | 2.81098         | -0.477047   | 8.46E-05  | 0.0018588 |



|                  |            |                 |            |           |           |
|------------------|------------|-----------------|------------|-----------|-----------|
| Osbpl11          | 3.64426    | 4.09578         | 0.168512   | 0.208525  | 0.552571  |
| Osbpl11_j3       | 0.613792   | 0.727829        | 0.24585    | 0.535655  | 0.80631   |
| Snx4_j2          | 0.155076   | 0 -1.79769e+308 |            | 0.0006987 | 0.0107098 |
| Snx4_j1          | 3.09304    | 3.0716          | -0.0100347 | 0.960692  | 0.988891  |
| Zfp148           | 0.00587621 | 0.132824        | 0          | 1         | 1         |
| Zfp148_j4        | 1.72721    | 0.723203        | 0          | 1         | 1         |
| Heg1_j1          | 0.686837   | 0.619721        | 0          | 1         | 1         |
| Itgb5_j1         | 0.486194   | 2.34019         | 2.26702    | 3.16E-07  | 1.49E-05  |
| Ccdc14           | 0.356426   | 0.196872        | -0.856341  | 0.0486515 | 0.254131  |
| Mylk_j4          | 0.222225   | 0.0703497       | -1.6594    | 0.0670891 | 0.309734  |
| Ptplb            | 0.938995   | 0.238405        | -1.9777    | 3.06E-06  | 0.0001108 |
| Adcy5            | 7.30714    | 7.27083         | 0          | 1         | 1         |
| Sema5b           | 0.342899   | 0.22025         | -0.63864   | 0.101364  | 0.394329  |
| Kpna1_j1         | 14.1114    | 11.1251         | 0          | 1         | 1         |
| Iqcb1_j1         | 2.36635    | 1.82292         | 0          | 1         | 1         |
| Iqcb1_j4         | 3.99819    | 3.61148         | 0          | 1         | 1         |
| Iqcb1_j6         | 0.344407   | 0.146753        | 0          | 1         | 1         |
| Golgb1_j4        | 0.905728   | 0.915834        | 0          | 1         | 1         |
| Hcls1            | 0.876194   | 1.58497         | 0.855131   | 0.0002254 | 0.004238  |
| Rabl3            | 6.27153    | 6.01239         | 0          | 1         | 1         |
| Lrrc58           | 0.493981   | 0.504201        | 0          | 1         | 1         |
| Gpr156_j3        | 0.0999032  | 0 -1.79769e+308 |            | 0.0002517 | 1         |
| Gpr156           | 0.676336   | 0.735985        | 0.121936   | 0.628383  | 0.855356  |
| Gpr156_j5        | 0.445355   | 0.29835         | -0.577947  | 0.169036  | 0.505791  |
| Gsk3b_j1         | 1.3398     | 1.18415         | 0          | 1         | 1         |
| Gsk3b_j2         | 39.0343    | 37.6448         | 0          | 1         | 1         |
| Cox17            | 67.8442    | 64.3364         | -0.0765914 | 0.495039  | 0.782733  |
| Popdc2_j3        | 0.310755   | 0 -1.79769e+308 |            | 0.0002009 | 0.0038528 |
| Tmem39a_j6       | 0.393242   | 0.0310921       | -3.66079   | 0.0057264 | 0.0563831 |
| Tmem39a          | 0.583787   | 0.703147        | 0.268384   | 0.449317  | 0.755468  |
| Tmem39a_j5       | 0.0900857  | 0 -1.79769e+308 |            | 0.0039559 | 1         |
| B4galt4          | 5.36358    | 4.84054         | -0.148029  | 0.355318  | 0.691299  |
| Igsf11           | 5.03569    | 5.38918         | 0.0978752  | 0.43724   | 0.747555  |
| Lsamp_j3         | 2.40134    | 1.98938         | -0.271516  | 0.328108  | 0.670681  |
| Lsamp_j5         | 12.2155    | 8.40956         | 0          | 1         | 1         |
| BC002163         | 113.214    | 116.17          | 0.0371912  | 0.698402  | 0.888784  |
| Zbtb20_j3        | 0.100059   | 0 -1.79769e+308 |            | 6.74E-15  | 1         |
| Zbtb20_j5        | 0.761018   | 0.342788        | -1.15061   | 9.40E-11  | 9.64E-09  |
| Zbtb20_j10       | 0.389563   | 0.159858        | -1.28506   | 1.62E-07  | 8.20E-06  |
| Zbtb20_j12       | 0.287323   | 0.324967        | 0.177621   | 0.384422  | 0.713264  |
| 2610015P09Rik_j1 | 0.834759   | 0.495748        | -0.751753  | 0.0167796 | 0.124626  |
| Naa50            | 8.30648    | 8.46731         | 0          | 1         | 1         |
| Naa50            | 4.66973    | 4.37949         | 0          | 1         | 1         |
| Gm608_j1         | 0.553963   | 0.454247        | -0.286314  | 0.183588  | 0.52417   |
| Spice1           | 1.6767     | 1.4474          | -0.212159  | 0.245477  | 0.592921  |
| BC027231         | 0.615624   | 0.549428        | -0.164118  | 0.383367  | 0.713019  |
| Ccdc80           | 0.544522   | 0.33288         | 0          | 1         | 1         |

|             |           |                 |             |           |           |
|-------------|-----------|-----------------|-------------|-----------|-----------|
| XLOC_012612 | 0.149373  | 0.12852         | -0.216926   | 0.695333  | 0.887572  |
| Gm7204      | 80.4652   | 81.9738         | 0.0267995   | 0.778302  | 0.925153  |
| Morc1_j2    | 0.0592801 | 0.0164299       | -1.85122    | 0.43314   | 1         |
| Retnlg      | 1.68133   | 0.455846        | -1.88298    | 8.26E-05  | 0.0018229 |
| Myh15_j2    | 0.081738  | 0 -1.79769e+308 |             | 0.0062038 | 1         |
| Ift57       | 8.4086    | 8.05109         | 0           | 1         | 1         |
| Cblb        | 2.19433   | 3.56262         | 0           | 1         | 1         |
| Zbtb11      | 2.35075   | 2.15285         | 0           | 1         | 1         |
| Zbtb11_j2   | 3.59458   | 3.18785         | 0           | 1         | 1         |
| Senp7_j3    | 0.0886864 | 0 -1.79769e+308 |             | 0.0031446 | 1         |
| Abi3bp_j5   | 1.80854   | 1.43225         | 0           | 1         | 1         |
| Tomm70a     | 3.67103   | 3.32781         | 0           | 1         | 1         |
| Dcbld2      | 2.19597   | 1.72753         | 0           | 1         | 1         |
| Cpox        | 8.31606   | 7.57755         | -0.134168   | 0.245675  | 0.593119  |
| Cldnd1_j3   | 15.4779   | 17.4921         | 0           | 1         | 1         |
| Cldnd1_j2   | 15.8726   | 17.1924         | 0           | 1         | 1         |
| Mina        | 2.76124   | 3.36149         | 0.283783    | 0.0386926 | 0.219137  |
| Gm9027      | 0.679784  | 0.869584        | 0.35525     | 0.329794  | 0.671845  |
| Pros1       | 2.2875    | 2.82917         | 0           | 1         | 1         |
| Cggbp1      | 2.90848   | 3.04306         | 0           | 1         | 1         |
| Cggbp1      | 8.57659   | 8.61994         | 0           | 1         | 1         |
| Vgll3_j1    | 0.533573  | 0.372017        | -0.520317   | 0.0545349 | 0.272417  |
| Vgll3_j2    | 0.0573655 | 0 -1.79769e+308 |             | 0.0014785 | 1         |
| Gbe1_j1     | 3.94927   | 3.18824         | 0           | 1         | 1         |
| Gbe1        | 6.14897   | 5.51311         | 0           | 1         | 1         |
| Robo1_j9    | 0.792589  | 0.725788        | -0.127026   | 0.720481  | 0.899844  |
| Rbm11       | 13.776    | 11.3483         | -0.27968    | 0.0059908 | 0.0584671 |
| Usp25       | 3.39738   | 2.5011          | -0.441859   | 0.0094394 | 0.0820891 |
| Usp25_j4    | 4.29803   | 3.86952         | -0.151522   | 0.372792  | 0.705714  |
| Cxadr_j1    | 0.108158  | 0.110233        | 0.0274174   | 0.982326  | 1         |
| Chodl       | 1.06873   | 0.662498        | -0.689905   | 0.0117417 | 0.0965344 |
| Ncam2       | 1.14962   | 0.955376        | -0.267017   | 0.328612  | 0.671147  |
| Ncam2       | 1.98735   | 1.60406         | -0.309122   | 0.0274374 | 0.175183  |
| Jam2        | 3.45272   | 2.45971         | 0           | 1         | 1         |
| Jam2_j1     | 6.50112   | 5.302           | 0           | 1         | 1         |
| Jam2_j3     | 0.703258  | 1.15226         | 0           | 1         | 1         |
| Gabpa       | 2.10389   | 2.35315         | 0           | 1         | 1         |
| Gabpa       | 2.4011    | 2.18694         | 0           | 1         | 1         |
| N6amt1      | 8.68041   | 8.63755         | -0.00714017 | 0.95807   | 0.987996  |
| N6amt1_j1   | 0.24297   | 0.27046         | 0.154637    | 0.84297   | 0.950311  |
| Bach1       | 0.800619  | 1.08718         | 0           | 1         | 1         |
| Sod1_j1     | 6.69519   | 6.93407         | 0.0505789   | 0.748838  | 0.912687  |
| Sod1_j3     | 37.66     | 41.4718         | 0.139098    | 0.208106  | 0.55225   |
| Hunk_j1     | 0         | 0.119274        | 0           | 1         | 1         |
| Hunk        | 0.719126  | 0.556859        | 0           | 1         | 1         |
| AK090163_j1 | 0.265969  | 0.128127        | -1.05368    | 0.163241  | 0.498589  |
| AK090163    | 0.0736681 | 0.0627712       | -0.230939   | 0.818262  | 1         |

|               |            |           |               |           |           |
|---------------|------------|-----------|---------------|-----------|-----------|
| Mrap          | 0.267934   | 0.283121  | 0.0795409     | 0.88143   | 0.962341  |
| Mrap_j1       | 0.817535   | 0.563476  | -0.536927     | 0.260963  | 0.609903  |
| 4931408A02Rik | 0.314715   | 0.0351355 | -3.16305      | 5.31E-11  | 5.73E-09  |
| Ifnar2        | 2.31789    | 2.90596   | 0             | 1         | 1         |
| Il10rb        | 5.46822    | 6.33134   | 0.21144       | 0.188199  | 0.529448  |
| Il10rb_j1     | 21.7949    | 27.1479   | 0.316854      | 0.0019834 | 0.0248178 |
| Ifnar1        | 8.62701    | 9.18959   | 0.0911394     | 0.347671  | 0.686258  |
| Ifngr2        | 29.4612    | 27.7291   | -0.0874116    | 0.370603  | 0.703657  |
| Son           | 19.8265    | 19.7342   | -0.00673084   | 0.938708  | 0.981299  |
| Itns1         | 5.69624    | 5.78034   | 0.0211442     | 0.849299  | 0.952228  |
| Itns1_j2      | 1.92176    | 2.38034   | 0.308738      | 0.173057  | 0.510745  |
| Mrps6         | 18.2297    | 19.7465   | 0.115303      | 0.398324  | 0.722444  |
| Fam165b       | 5.60662    | 5.11608   | -0.132092     | 0.625346  | 0.853869  |
| Cbr1          | 0.0345714  | 0.128126  | 1.88991       | 0.244483  | 1         |
| Cbr1_j4       | 14.1885    | 16.0929   | 0.181701      | 0.330328  | 0.672202  |
| Dopey2_j1     | 10.8403    | 8.67128   | -0.322083     | 0.001054  | 0.0148908 |
| Dopey2_j2     | 0          | 0.081942  | 1.79769e+308  | 0.0021961 | 1         |
| Morc3         | 2.79154    | 1.97191   | 0             | 1         | 1         |
| Morc3_j3      | 0.0671473  | 0         | 0             | 1         | 1         |
| Chaf1b        | 0.151681   | 0.0637084 | -1.25148      | 0.178737  | 0.518255  |
| Chaf1b_j1     | 0.074298   | 0.09428   | 0.343628      | 0.760634  | 1         |
| Chaf1b_j3     | 0.641224   | 0         | -1.79769e+308 | 9.18E-10  | 7.70E-08  |
| Ttc3_j2       | 6.98508    | 4.77007   | 0             | 1         | 1         |
| Ttc3_j1       | 0.441731   | 0.361315  | 0             | 1         | 1         |
| Dyrk1a_j1     | 3.64851    | 2.43829   | 0             | 1         | 1         |
| Dyrk1a_j3     | 0.744614   | 0.744415  | 0             | 1         | 1         |
| Ets2          | 5.38949    | 7.78213   | 0.530015      | 6.88E-06  | 0.0002241 |
| Wrb           | 8.19813    | 8.91243   | 0             | 1         | 1         |
| Wrb_j3        | 9.08582    | 8.50994   | 0             | 1         | 1         |
| Sh3bgr_j2     | 0.358556   | 0.0316852 | -3.50032      | 0.0795329 | 0.342515  |
| Sh3bgr_j4     | 0.645188   | 0.508844  | -0.342498     | 0.666504  | 0.873739  |
| B3galt5_j1    | 0.674664   | 0.103291  | 0             | 1         | 1         |
| B3galt5       | 3.2645     | 2.4599    | 0             | 1         | 1         |
| Pcp4          | 235.851    | 166.365   | 0             | 1         | 1         |
| Bace2         | 1.35916    | 1.13252   | -0.263175     | 0.0950853 | 0.38063   |
| Mx2_j3        | 0.235765   | 0         | -1.79769e+308 | 1.48E-05  | 0.0004315 |
| Mx2           | 0.127979   | 1.01841   | 2.99234       | 2.16E-08  | 1.41E-06  |
| Mx2_j7        | 0.120694   | 0         | -1.79769e+308 | 0.0017167 | 1         |
| Zfp597        | 0.397704   | 0.388796  | -0.0326796    | 0.924834  | 0.976561  |
| Zfp597_j1     | 2.47625    | 2.38838   | -0.0521198    | 0.716078  | 0.897497  |
| 1700037C18Rik | 1.0364     | 1.02623   | -0.0142277    | 0.965856  | 0.9902    |
| Nlrc3_j1      | 0.0900438  | 0.0126109 | -2.83596      | 0.172441  | 1         |
| Nlrc3_j2      | 0.0604407  | 0         | -1.79769e+308 | 0.0174429 | 1         |
| Nlrc3_j3      | 0.102345   | 0.163358  | 0.674595      | 0.306784  | 0.651982  |
| Btbd12        | 0.392827   | 0.436258  | 0.151286      | 0.781699  | 0.926325  |
| Slx4_j8       | 0.00656898 | 0.151133  | 4.52401       | 0.0023074 | 1         |
| Slx4_j11      | 0.176377   | 0.0283233 | -2.6386       | 0.0383914 | 0.217988  |

|                  |           |                 |              |           |           |
|------------------|-----------|-----------------|--------------|-----------|-----------|
| Trap1_j1         | 4.36173   | 4.34951         | 0            | 1         | 1         |
| Trap1_j7         | 11.099    | 10.0881         | 0            | 1         | 1         |
| Crebbp_j3        | 2.93311   | 3.82303         | 0.382285     | 0.0035041 | 0.0389704 |
| Crebbp           | 1.27983   | 1.05264         | -0.281935    | 0.0934371 | 0.376444  |
| Adcy9            | 3.13725   | 2.41836         | 0            | 1         | 1         |
| Srl_j2           | 1.6105    | 1.62858         | 0.0161089    | 0.933084  | 0.979673  |
| Tcfap4_j3        | 0.108387  | 0 -1.79769e+308 | 0.0105234    |           | 1         |
| Tcfap4           | 0.843729  | 0.571543        | -0.561917    | 0.0852352 | 0.356401  |
| Coro7_j4         | 5.73821   | 5.98613         | 0            | 1         | 1         |
| Coro7_j7         | 2.31256   | 3.3232          | 0            | 1         | 1         |
| Nmral1           | 1.09169   | 1.16312         | 0.091426     | 0.747473  | 0.912113  |
| 5730403B10Rik    | 8.06215   | 8.20895         | 0            | 1         | 1         |
| 5730403B10Rik    | 5.15804   | 5.09997         | 0            | 1         | 1         |
| Fam100a          | 42.3807   | 43.329          | 0.0319259    | 0.748706  | 0.912595  |
| Rogdi            | 32.637    | 32.4958         | -0.00625779  | 0.950915  | 0.985847  |
| Glyr1_j4         | 14.5297   | 16.7136         | 0            | 1         | 1         |
| Glyr1_j5         | 0.890772  | 0.874398        | 0            | 1         | 1         |
| Glyr1_j8         | 0.793465  | 0.455127        | 0            | 1         | 1         |
| Glyr1_j9         | 0.637345  | 1.00251         | 0            | 1         | 1         |
| Glyr1            | 4.78319   | 4.84571         | 0            | 1         | 1         |
| Ppl_j1           | 0.187222  | 0.0599423       | -1.64311     | 0.0102605 | 0.0871661 |
| Nagpa            | 1.12333   | 1.2745          | 0            | 1         | 1         |
| AU021092         | 0.509905  | 0.359718        | -0.503361    | 0.222733  | 0.56968   |
| Fam86            | 2.26779   | 1.88059         | 0            | 1         | 1         |
| Tmem114          | 0.251869  | 0.173304        | -0.539371    | 0.437404  | 0.747672  |
| Carhsp1_j1       | 4.79511   | 9.07633         | 0            | 1         | 1         |
| Usp7             | 14.1779   | 13.5977         | 0            | 1         | 1         |
| Emp2             | 14.1056   | 13.3145         | -0.0832686   | 0.414856  | 0.73287   |
| Tekt5            | 1.00275   | 0.799617        | -0.326577    | 0.202945  | 0.546795  |
| Fam18a_j2        | 1.56369   | 1.50255         | 0            | 1         | 1         |
| Dexi_j2          | 0.186309  | 0.210191        | 0.173999     | 0.89787   | 0.967543  |
| Dexi             | 12.5383   | 10.5694         | -0.246448    | 0.0373865 | 0.214381  |
| Socs1            | 0.694799  | 0.694359        | -0.000913887 | 0.998488  | 0.99937   |
| Litaf            | 7.87994   | 9.21025         | 0.225055     | 0.0759911 | 0.332943  |
| Txndc11          | 3.68323   | 3.45574         | -0.091976    | 0.4997    | 0.784721  |
| Rsl1d1           | 20.689    | 21.8296         | 0.0774247    | 0.448266  | 0.754844  |
| Gspt1            | 2.26211   | 2.47943         | 0.132343     | 0.367078  | 0.700519  |
| Cpped1_j1        | 0.39627   | 0.296182        | -0.42        | 0.387832  | 0.715426  |
| Parn             | 6.34777   | 5.90968         | -0.103169    | 0.43776   | 0.747827  |
| Pdxdc1           | 6.05692   | 6.02399         | 0            | 1         | 1         |
| 4921513D23Rik_j3 | 12.6802   | 11.8195         | 0            | 1         | 1         |
| 4921513D23Rik_j5 | 2.41726   | 2.87035         | 0            | 1         | 1         |
| 4921513D23Rik    | 4.85282   | 4.16976         | 0            | 1         | 1         |
| Myh11_j3         | 0.112164  | 0.403795        | 1.84801      | 0.0004556 | 0.0075388 |
| Myh11_j4         | 0.0683591 | 0.0680109       | -0.00736671  | 0.992772  | 1         |
| 0610037P05Rik_j1 | 1.31563   | 1.19076         | 0            | 1         | 1         |
| 0610037P05Rik    | 13.1965   | 11.7397         | 0            | 1         | 1         |

|                  |           |                 |             |           |           |
|------------------|-----------|-----------------|-------------|-----------|-----------|
| 0610037P05Rik    | 11.8991   | 12.9167         | 0           | 1         | 1         |
| Ube2v2_j3        | 2.75116   | 1.93912         | 0           | 1         | 1         |
| Ube2v2_j2        | 1.12428   | 0.485579        | 0           | 1         | 1         |
| Ube2v2           | 5.54421   | 4.67566         | 0           | 1         | 1         |
| Mcm4             | 3.86557   | 3.82081         | -0.016803   | 0.901741  | 0.968734  |
| Mzt2             | 10.8346   | 11.0061         | 0.0226526   | 0.868728  | 0.958389  |
| 2310008H04Rik    | 1.14614   | 1.24393         | 0.118121    | 0.557721  | 0.819799  |
| Dnm1l            | 9.82839   | 6.55894         | 0           | 1         | 1         |
| Dnm1l_j6         | 18.3113   | 16.5033         | 0           | 1         | 1         |
| Fgd4_j9          | 0.216167  | 0.0759807       | -1.50844    | 0.19346   | 0.535786  |
| Fgd4_j4          | 0.0757287 | 0 -1.79769e+308 | 0.0064018   |           | 1         |
| Fgd4             | 0.324735  | 0.596584        | 0.877463    | 0.0008086 | 0.0120716 |
| Fgd4             | 0.241084  | 0.0963651       | -1.32295    | 0.0398661 | 0.223369  |
| Sdf2l1           | 9.09385   | 11.9633         | 0.395651    | 0.008421  | 0.0753764 |
| Ube2l3_j6        | 0.557722  | 0.985083        | 0.820699    | 0.0283059 | 0.178692  |
| Pi4ka_j8         | 16.986    | 15.3353         | -0.147494   | 0.112464  | 0.41729   |
| Pi4ka_j9         | 5.59731   | 4.97787         | -0.169204   | 0.15186   | 0.483219  |
| Slc7a4_j1        | 0.243041  | 0               | 0           | 1         | 1         |
| Med15_j5         | 0.669057  | 0.514099        | 0           | 1         | 1         |
| Med15            | 8.2056    | 6.49922         | 0           | 1         | 1         |
| Dgcr2_j6         | 22.3503   | 24.2001         | 0           | 1         | 1         |
| Dgcr14_j1        | 0.598263  | 0.595847        | -0.00583878 | 0.989204  | 0.996607  |
| Dgcr14_j2        | 0.126686  | 0.119544        | -0.083722   | 0.92112   | 1         |
| Dgcr14           | 5.90303   | 5.77257         | -0.0322428  | 0.813959  | 0.939357  |
| Slc25a1_j2       | 18.1689   | 22.8738         | 0           | 1         | 1         |
| Slc25a1          | 28.543    | 28.2155         | 0           | 1         | 1         |
| 4933432I09Rik_j2 | 0.0302166 | 0.0712036       | 0           | 1         | 1         |
| 4933432I09Rik_j1 | 0.145878  | 0.12586         | 0           | 1         | 1         |
| Zdhhc8_j3        | 2.12778   | 2.72767         | 0           | 1         | 1         |
| Zdhhc8_j4        | 0.247359  | 0.041609        | 0           | 1         | 1         |
| Zdhhc8_j9        | 6.97649   | 6.55986         | 0           | 1         | 1         |
| Ranbp1_j2        | 21.2386   | 25.7238         | 0.276413    | 0.0282596 | 0.178512  |
| Dgcr8_j2         | 3.60994   | 4.11836         | 0.190093    | 0.0731124 | 0.325538  |
| D16H22S680E      | 21.8314   | 24.273          | 0           | 1         | 1         |
| D16H22S680E_j4   | 11.4897   | 9.2328          | 0           | 1         | 1         |
| Comt_j1          | 0.306813  | 0.325411        | 0           | 1         | 1         |
| Comt_j5          | 0.828806  | 3.92945         | 0           | 1         | 1         |
| Mrpl40           | 1.73128   | 1.78639         | 0.045211    | 0.878651  | 0.961245  |
| A930003A15Rik    | 0.202776  | 0.430543        | 1.08627     | 0.111414  | 0.415473  |
| Klhl6_j5         | 0.172222  | 0.187847        | 0.125294    | 0.910988  | 0.972049  |
| Klhl6_j6         | 0.152291  | 0 -1.79769e+308 | 0.0004325   |           | 0.0072098 |
| Klhl6_j7         | 0.316204  | 0.217178        | -0.541974   | 0.492562  | 0.781115  |
| Map6d1           | 0.981169  | 0.716719        | -0.453095   | 0.0923487 | 0.37398   |
| Parl_j1          | 1.05204   | 0 -1.79769e+308 | 7.19E-10    |           | 6.19E-08  |
| Abcc5            | 6.65456   | 5.95252         | 0           | 1         | 1         |
| Alg3             | 0.300565  | 0.400165        | 0.412919    | 0.137213  | 0.460677  |
| Camk2n2          | 30.7116   | 26.9797         | -0.186909   | 0.0499095 | 0.258155  |

|                  |             |                 |            |           |           |
|------------------|-------------|-----------------|------------|-----------|-----------|
| Clcn2_j4         | 1.4052      | 1.55602         | 0          | 1         | 1         |
| Gm8017           | 124.586     | 149.938         | 0.267225   | 0.0038452 | 0.0416841 |
| XLOC_012801      | 0.245849    | 0.0811912       | -1.59838   | 0.120449  | 0.432238  |
| 2510009E07Rik_j1 | 20.6933     | 19.7281         | 0          | 1         | 1         |
| 2510009E07Rik    | 9.23822     | 6.79794         | 0          | 1         | 1         |
| Ehhadh           | 1.22992     | 1.26163         | 0.0367143  | 0.876414  | 0.960747  |
| Ehhadh_j4        | 0.933619    | 0.672209        | -0.473924  | 0.144538  | 0.471765  |
| Tmem41a_j1       | 5.6385      | 4.3724          | 0          | 1         | 1         |
| Tmem41a          | 16.4536     | 16.3662         | 0          | 1         | 1         |
| Igf2bp2_j5       | 0.237129    | 0.447284        | 0.915517   | 0.0826021 | 0.350285  |
| Tra2b_j1         | 0.199963    | 0.106909        | -0.903351  | 0.0507918 | 0.260997  |
| Etv5_j1          | 7.38523     | 6.14972         | 0          | 1         | 1         |
| Etv5_j2          | 0.406988    | 0.441471        | 0          | 1         | 1         |
| Dgkg             | 0.61929     | 0.421063        | 0          | 1         | 1         |
| Tbccd1_j5        | 1.59477     | 2.15436         | 0.433909   | 0.098138  | 0.387205  |
| Tbccd1           | 1.46327     | 0.973047        | -0.58861   | 0.0437203 | 0.237773  |
| Tbccd1_j3        | 3.01888     | 2.75509         | -0.131913  | 0.443357  | 0.751273  |
| Masp1            | 0.849988    | 1.04591         | 0.29924    | 0.161628  | 0.496593  |
| Masp1            | 3.00321     | 2.38034         | -0.335335  | 0.0593048 | 0.286271  |
| Sst              | 3.3749      | 3.24144         | -0.0582076 | 0.784874  | 0.927751  |
| Bcl6_j1          | 2.58564     | 3.41486         | 0          | 1         | 1         |
| Bcl6_j2          | 0.498289    | 0.00422561      | 0          | 1         | 1         |
| Bcl6             | 5.14468     | 3.80274         | 0          | 1         | 1         |
| AK039760         | 0.768741    | 0.607696        | -0.339147  | 0.562178  | 0.822061  |
| AK004252         | 1.17632     | 1.43475         | 0.286526   | 0.435317  | 0.746211  |
| Leprel1          | 0.313824    | 0.4042          | 0.365113   | 0.360885  | 0.695659  |
| Cldn1            | 2.38857     | 2.99843         | 0.328059   | 0.034583  | 0.204167  |
| Uts2d            | 3.48795     | 1.95744         | -0.833415  | 0.0010019 | 0.0143461 |
| Fgf12            | 5.66963     | 4.54915         | 0          | 1         | 1         |
| Fgf12_j2         | 1.41775     | 0.648187        | 0          | 1         | 1         |
| Fgf12            | 5.19066     | 3.39505         | 0          | 1         | 1         |
| Fgf12_j8         | 0.0615659   | 0.0301002       | 0          | 1         | 1         |
| 1600021P15Rik    | 4.84575     | 4.14771         | -0.224404  | 0.112669  | 0.417775  |
| Atp13a4_j5       | 0.088858    | 0 -1.79769e+308 | 0.028503   | 0.028503  | 1         |
| AK165338_j1      | 0.000648508 | 0.193549        | 8.22136    | 0.199003  | 0.542173  |
| AK165338_j2      | 0.100849    | 0 -1.79769e+308 | 6.04E-05   | 6.04E-05  | 1         |
| AK165338_j11     | 0.375847    | 0.331903        | -0.179386  | 0.790289  | 0.930148  |
| Atp13a3          | 2.64109     | 3.1458          | 0          | 1         | 1         |
| Atp13a3_j7       | 1.16321     | 0.0278919       | 0          | 1         | 1         |
| Tmem44_j5        | 0.0609976   | 0.0368735       | -0.726168  | 0.456686  | 1         |
| Lsg1             | 6.54799     | 6.25005         | -0.0671851 | 0.609719  | 0.846292  |
| AI480653_j4      | 0.262389    | 0               | 0          | 1         | 1         |
| AI480653         | 1.97187     | 1.3907          | 0          | 1         | 1         |
| Acap2_j1         | 2.61204     | 1.98162         | 0          | 1         | 1         |
| Apod_j2          | 5.81675     | 9.44523         | 0          | 1         | 1         |
| Senp5_j6         | 0.250969    | 0.0297787       | 0          | 1         | 1         |
| Senp5            | 1.8124      | 1.6137          | 0          | 1         | 1         |

|                  |           |           |               |           |           |
|------------------|-----------|-----------|---------------|-----------|-----------|
| Pak2             | 5.56639   | 5.27965   | 0             | 1         | 1         |
| Lrrc33           | 0.369804  | 0.185055  | -0.998806     | 0.0858583 | 0.357681  |
| Lrrc33_j1        | 0.227145  | 0         | -1.79769e+308 | 4.95E-05  | 0.0011837 |
| Lrrc33           | 0.398528  | 0.496138  | 0.316059      | 0.452558  | 0.757663  |
| Fbxo45           | 5.88745   | 5.32118   | 0             | 1         | 1         |
| Osta             | 1.13589   | 0.654369  | 0             | 1         | 1         |
| 1700021K19Rik_j5 | 3.26972   | 4.0013    | 0             | 1         | 1         |
| 1700021K19Rik    | 4.73898   | 6.15691   | 0             | 1         | 1         |
| AK160141         | 0.235755  | 0.172339  | -0.452042     | 0.569673  | 0.825926  |
| Umps             | 3.5177    | 3.87133   | 0.138197      | 0.324024  | 0.667119  |
| Sec22a           | 5.00207   | 4.50683   | -0.150412     | 0.400719  | 0.724121  |
| Pdia5            | 3.30242   | 3.56104   | 0             | 1         | 1         |
| Dirc2_j2         | 5.23373   | 5.87072   | 0.165697      | 0.376068  | 0.708118  |
| Dirc2            | 0.723178  | 0.559202  | -0.370982     | 0.157069  | 0.490842  |
| Parp14_j1        | 0.105742  | 0.0414144 | -1.35234      | 0.0802371 | 1         |
| Parp14           | 0.470599  | 0.656056  | 0.479321      | 0.0442704 | 0.239961  |
| AK144265_j2      | 0.468286  | 0.396203  | 0             | 1         | 1         |
| Fam162a          | 7.14608   | 7.29453   | 0.0296635     | 0.863885  | 0.956651  |
| Cd86             | 0.202942  | 0.480273  | 1.24279       | 0.001411  | 0.0188111 |
| Slc15a2          | 0.630234  | 0.215751  | -1.54652      | 0.0005845 | 0.0092745 |
| Fbxo40           | 0.583911  | 0.0394762 | -3.88669      | 5.22E-06  | 0.0001755 |
| Stxbp5l_j1       | 2.14593   | 1.81518   | 0             | 1         | 1         |
| Gtf2e1           | 4.13593   | 2.84302   | 0             | 1         | 1         |
| Ndufb4_j2        | 0.42283   | 0.393246  | -0.104646     | 0.82852   | 0.944579  |
| 4932425I24Rik_j2 | 0.254451  | 0.409918  | 0.687949      | 0.259611  | 0.608462  |
| Pla1a            | 0.206785  | 0.152188  | -0.442281     | 0.50734   | 0.789639  |
| Adprh_j1         | 59.376    | 59.4883   | 0.00272445    | 0.976804  | 0.993246  |
| Adprh            | 10.6759   | 9.90518   | -0.108107     | 0.394863  | 0.720044  |
| 4930455C21Rik_j1 | 4.11234   | 3.01821   | 0             | 1         | 1         |
| 4930455C21Rik    | 1.22732   | 1.24267   | 0             | 1         | 1         |
| Ktelc1_j4        | 10.2017   | 11.8416   | 0             | 1         | 1         |
| Poglut1          | 11.1365   | 9.75365   | 0             | 1         | 1         |
| Arhgap31         | 1.55213   | 1.47951   | -0.0691267    | 0.674352  | 0.877186  |
| Gap43_j2         | 0.204558  | 0         | -1.79769e+308 | 0.0474739 | 0.250146  |
| Gap43_j6         | 2.11673   | 5.91114   | 1.4816        | 1.54E-08  | 1.04E-06  |
| Gap43            | 43.5668   | 89.6472   | 1.04103       | 0         | 0         |
| AK016521_j1      | 0.162413  | 0.0521831 | -1.63801      | 0.23112   | 0.578144  |
| Tigit_j1         | 0.104929  | 0.1142    | 0.122141      | 0.891075  | 1         |
| Qtrtd1_j2        | 0.158393  | 0         | 0             | 1         | 1         |
| Qtrtd1_j3        | 0.608591  | 0.207591  | 0             | 1         | 1         |
| Zdhhc23_j8       | 0.207513  | 0.287043  | 0             | 1         | 1         |
| Zdhhc23          | 0.141468  | 0         | 0             | 1         | 1         |
| XLOC_012890      | 0.0963053 | 0.0285514 | -1.75406      | 0.425393  | 1         |
| Atp6v1a          | 10.2995   | 7.99884   | 0             | 1         | 1         |
| Atp6v1a          | 3.61585   | 2.72808   | 0             | 1         | 1         |
| Boc_j2           | 0.193392  | 0.158303  | 0             | 1         | 1         |
| Boc_j7           | 0.121608  | 0.24931   | 0             | 1         | 1         |

|                  |           |                 |            |           |           |
|------------------|-----------|-----------------|------------|-----------|-----------|
| Gtpbp8_j2        | 5.07784   | 5.33054         | 0.0700658  | 0.612751  | 0.847359  |
| Gtpbp8           | 1.94558   | 1.7828          | -0.126052  | 0.473471  | 0.770096  |
| Cd200            | 3.49411   | 4.35734         | 0.318521   | 0.0377103 | 0.215545  |
| Gm609_j1         | 0.179043  | 0.066795        | -1.42249   | 0.201482  | 0.544991  |
| Tmprss7_j4       | 0.625478  | 0 -1.79769e+308 |            | 1.61E-12  | 2.22E-10  |
| Tagln3_j4        | 0.139271  | 0               | 0          | 1         | 1         |
| Tagln3_j5        | 91.5861   | 86.1843         | 0          | 1         | 1         |
| Tagln3           | 1.17117   | 1.03642         | 0          | 1         | 1         |
| Abhd10           | 0.20899   | 0.25088         | 0          | 1         | 1         |
| Phldb2_j1        | 1.70827   | 1.39019         | 0          | 1         | 1         |
| Phldb2_j4        | 0.439057  | 0.569799        | 0          | 1         | 1         |
| Phldb2_j2        | 0.413974  | 0.189965        | 0          | 1         | 1         |
| Plcx2            | 4.60443   | 4.88108         | 0          | 1         | 1         |
| Cd96_j1          | 1.01813   | 0.596429        | -0.771497  | 0.124049  | 0.438888  |
| Cd96_j5          | 0.273068  | 0.221983        | -0.298813  | 0.735191  | 0.906659  |
| Gm4737           | 23.996    | 32.493          | 0.437337   | 5.22E-06  | 0.0001755 |
| Pvrl3_j6         | 2.03848   | 3.85382         | 0          | 1         | 1         |
| Pvrl3            | 3.99753   | 4.13247         | 0          | 1         | 1         |
| XLOC_012906      | 0.246596  | 0.168887        | -0.546092  | 0.472988  | 0.769762  |
| Dzip3            | 2.86308   | 2.26063         | -0.340843  | 0.0219112 | 0.150107  |
| Dzip3_j5         | 0.654551  | 0.59323         | -0.141915  | 0.58129   | 0.832206  |
| Bbx_j16          | 0.418941  | 0.743134        | 0          | 1         | 1         |
| Bbx_j8           | 0.182205  | 0.478352        | 0          | 1         | 1         |
| Gm9575           | 38.094    | 40.4133         | 0.0852653  | 0.386585  | 0.714571  |
| 5330426P16Rik_j1 | 1.21766   | 1.77908         | 0.547019   | 0.110114  | 0.41294   |
| Alcam_j1         | 15.0805   | 15.947          | 0          | 1         | 1         |
| Alcam_j2         | 0.207787  | 0.145371        | 0          | 1         | 1         |
| Fam55c_j2        | 1.48153   | 0.902809        | 0          | 1         | 1         |
| Fam55c_j1        | 1.2174    | 0.775448        | 0          | 1         | 1         |
| Cep97_j2         | 1.0783    | 1.11867         | 0          | 1         | 1         |
| Cep97            | 0.828637  | 0.551858        | 0          | 1         | 1         |
| Pcnp_j3          | 0.182963  | 0.165278        | -0.146658  | 0.841853  | 0.950043  |
| Pcnp_j2          | 5.76905   | 5.58012         | -0.0480373 | 0.753494  | 0.914801  |
| Rg9mtd1          | 6.73029   | 6.24035         | -0.109041  | 0.4181    | 0.735013  |
| Rg9mtd1_j1       | 0.11034   | 0.512693        | 2.21614    | 1.65E-07  | 8.31E-06  |
| Tfg_j4           | 27.0078   | 27.4067         | 0          | 1         | 1         |
| Tfg              | 31.7096   | 32.8696         | 0          | 1         | 1         |
| Tfg_j2           | 10.6034   | 8.23503         | 0          | 1         | 1         |
| Tbc1d23_j2       | 5.19321   | 4.25856         | 0          | 1         | 1         |
| Col8a1           | 1.36893   | 1.64181         | 0.262238   | 0.0952799 | 0.381127  |
| St3gal6          | 3.25144   | 2.55498         | 0          | 1         | 1         |
| Crybg3_j2        | 0.374795  | 0.259907        | -0.528107  | 0.0397672 | 0.222986  |
| Arl6             | 2.00634   | 1.83593         | -0.128059  | 0.663165  | 0.872404  |
| Arl6             | 15.1263   | 15.0832         | -0.0041164 | 0.97245   | 0.991962  |
| Epha6_j1         | 0.0820057 | 0 -1.79769e+308 |            | 4.10E-08  | 1         |
| Epha6            | 0.920343  | 0.37738         | -1.28615   | 3.79E-11  | 4.21E-09  |
| Nsun3            | 0.839644  | 0.837684        | 0          | 1         | 1         |



|                  |           |                 |            |           |           |
|------------------|-----------|-----------------|------------|-----------|-----------|
| Nsun3            | 1.0988    | 0.938503        | 0          | 1         | 1         |
| Arl13b_j2        | 0.741057  | 0.453849        | 0          | 1         | 1         |
| Arl13b           | 0.520003  | 0.90543         | 0          | 1         | 1         |
| Arl13b_j1        | 0.688175  | 0.655435        | 0          | 1         | 1         |
| 4930453N24Rik    | 0.910391  | 1.0368          | 0.187576   | 0.379176  | 0.710597  |
| 4930453N24Rik    | 0.671615  | 0.665684        | -0.0127978 | 0.961     | 0.988945  |
| Zfp654_j1        | 0.88561   | 0.0113525       | 0          | 1         | 1         |
| Zfp654_j3        | 1.04337   | 1.50905         | 0          | 1         | 1         |
| Chmp2b           | 5.51737   | 5.24356         | -0.0734321 | 0.602006  | 0.842556  |
| Cadm2_j2         | 2.1358    | 2.44211         | 0.193354   | 0.136635  | 0.459682  |
| Cadm2_j4         | 0.302235  | 0 -1.79769e+308 | 0.0106991  | 0.0899732 |           |
| Cadm2_j8         | 3.04313   | 3.49574         | 0.200041   | 0.427     | 0.741449  |
| Robo2_j7         | 6.42041   | 6.98281         | 0          | 1         | 1         |
| Robo2_j4         | 6.60542   | 3.74468         | 0          | 1         | 1         |
| Robo2_j14        | 0.101659  | 0.192505        | 0.921164   | 0.270313  | 0.619522  |
| Hspa13           | 6.19307   | 6.26761         | 0.0172602  | 0.878327  | 0.961084  |
| Samsn1_j2        | 4.54255   | 3.01382         | -0.591909  | 0.0004498 | 0.0074608 |
| Samsn1_j1        | 0.875345  | 0.787867        | -0.151899  | 0.665794  | 0.873346  |
| Nrip1_j1         | 2.37196   | 1.0876          | 0          | 1         | 1         |
| Nrip1_j2         | 0.313383  | 0               | 0          | 1         | 1         |
| Nrip1_j3         | 1.8591    | 3.15586         | 0          | 1         | 1         |
| AK087725_j2      | 0.135344  | 0.0771501       | -0.810896  | 0.593853  | 1         |
| AK087725_j3      | 3.31E-05  | 0.0539123       | 10.6676    | 0.987267  | 1         |
| Mrpl39_j7        | 0.126503  | 0.00637052      | -4.31161   | 0.254969  | 1         |
| XLOC_012955      | 0.19477   | 0.104808        | -0.894021  | 0.534142  | 0.805439  |
| Atp5j_j3         | 80.369    | 70.7372         | 0          | 1         | 1         |
| Atp5j            | 45.9904   | 13.8394         | 0          | 1         | 1         |
| App_j8           | 0.0435071 | 0.101842        | 0          | 1         | 1         |
| App              | 83.2665   | 69.2346         | 0          | 1         | 1         |
| AK080982         | 2.34052   | 2.23351         | -0.0675136 | 0.65275   | 0.867125  |
| Cyyr1            | 0.855298  | 0.733107        | -0.222403  | 0.468709  | 0.767193  |
| Adamts1_j2       | 1.00193   | 1.53129         | 0          | 1         | 1         |
| Adamts1          | 0.932814  | 1.74177         | 0          | 1         | 1         |
| Adamts5          | 0.923673  | 0.93015         | 0          | 1         | 1         |
| Ltn1_j5          | 4.01707   | 3.24855         | 0          | 1         | 1         |
| Rwdd2b           | 3.2995    | 1.70899         | 0          | 1         | 1         |
| Cct8_j1          | 0.5012    | 0.44659         | 0          | 1         | 1         |
| Grik1            | 39.4565   | 30.77           | 0          | 1         | 1         |
| Tiam1            | 0.510234  | 0.502342        | -0.0224886 | 0.945257  | 0.983703  |
| Tiam1_j2         | 0.431106  | 0.263791        | -0.708645  | 0.01353   | 0.106926  |
| Scaf4            | 0.501463  | 0.0183092       | -4.7755    | 4.28E-10  | 3.80E-08  |
| 2610039C10Rik    | 2.71326   | 2.78771         | 0.0390528  | 0.849821  | 0.952228  |
| Urb1_j1          | 0.155592  | 0 -1.79769e+308 | 0.0069345  | 0.0653853 |           |
| Urb1             | 0.698036  | 0.287627        | -1.2791    | 1.12E-05  | 0.0003415 |
| 1110004E09Rik_j1 | 6.98868   | 7.53752         | 0.109072   | 0.559915  | 0.820916  |
| 1110004E09Rik    | 1.13827   | 1.04614         | -0.121766  | 0.730222  | 0.904705  |
| Synj1_j15        | 0.742212  | 0               | 0          | 1         | 1         |

|            |           |                 |             |          |          |
|------------|-----------|-----------------|-------------|----------|----------|
| Synj1_j16  | 0.0468645 | 0               | 0           | 1        | 1        |
| Synj1_j17  | 0.761116  | 0.0501955       | 0           | 1        | 1        |
| Synj1_j20  | 0.512925  | 0.21894         | 0           | 1        | 1        |
| Gcfc1_j5   | 1.40575   | 1.47595         | 0           | 1        | 1        |
| C21orf66   | 2.05483   | 2.00992         | 0           | 1        | 1        |
| Gcfc1_j6   | 1.24369   | 1.06737         | 0           | 1        | 1        |
| Tmem50b_j5 | 39.9261   | 43.7445         | 0           | 1        | 1        |
| Tmem50b    | 26.9269   | 23.274          | 0           | 1        | 1        |
| Dnajc28    | 0.348008  | 0.394877        | 0           | 1        | 1        |
| Dnajc28_j2 | 0.383968  | 0               | 0           | 1        | 1        |
| Dnajc28_j1 | 0.161915  | 0.0750921       | 0           | 1        | 1        |
| Dnajc28    | 1.20729   | 0.897476        | 0           | 1        | 1        |
| Gart_j2    | 0.20827   | 0.168231        | -0.308014   | 0.610525 | 0.846532 |
| Cryz1_j1   | 3.42536   | 3.45957         | 0.0143363   | 0.893837 | 0.966325 |
| Atp5o      | 50.34     | 52.6297         | 0.064172    | 0.554437 | 0.817513 |
| Rcan1_j1   | 9.00309   | 13.2215         | 0           | 1        | 1        |
| Rcan1      | 4.94306   | 10.004          | 0           | 1        | 1        |
| Rcan1      | 15.9174   | 13.5161         | 0           | 1        | 1        |
| Runx1_j6   | 2.09489   | 2.67145         | 0           | 1        | 1        |
| Runx1      | 2.22122   | 1.80881         | 0           | 1        | 1        |
| Runx1      | 3.04348   | 2.05212         | 0           | 1        | 1        |
| Setd4_j3   | 0.16427   | 0.0637332       | -1.36595    | 0.289211 | 0.636786 |
| Setd4_j4   | 0.0897053 | 0.102077        | 0.186386    | 0.875496 | 1        |
| Setd4_j11  | 0.197886  | 0.231738        | 0.227821    | 0.729351 | 0.904065 |
| Setd4_j13  | 0.148277  | 0.0493577       | -1.58695    | 0.174509 | 0.512608 |
| Cldn14     | 0.464016  | 0.60771         | 0.389211    | 0.259987 | 0.608587 |
| Hlcs_j7    | 0.127969  | 0               | 0           | 1        | 1        |
| Hlcs       | 1.19384   | 0.691989        | 0           | 1        | 1        |
| Hlcs_j2    | 1.15584   | 0.413867        | 0           | 1        | 1        |
| Hlcs_j8    | 1.11923   | 0.000104372     | 0           | 1        | 1        |
| Dscr3      | 13.4929   | 13.4174         | -0.00809953 | 0.936941 | 0.980715 |
| Kcnj6      | 0.173209  | 0.0808437       | -1.09931    | 0.149333 | 0.478596 |
| Erg_j3     | 0.281351  | 0 -1.79769e+308 |             | 2.84E-07 | 1.36E-05 |
| Erg        | 0.205574  | 0.353931        | 0.78381     | 0.112806 | 0.418089 |
| Psmg1      | 4.1445    | 4.23755         | 0           | 1        | 1        |
| Brwd1      | 5.58204   | 5.57106         | 0           | 1        | 1        |
| Hmgn1_j1   | 2.08178   | 2.75697         | 0           | 1        | 1        |
| Lca5l_j2   | 0.131896  | 0.0966635       | -0.448362   | 0.623006 | 1        |
| Dscam_j11  | 0.814779  | 0.822562        | 0           | 1        | 1        |
| Dscam_j12  | 0.719741  | 0.710632        | 0           | 1        | 1        |
| Dscam_j3   | 1.33008   | 0.843409        | 0           | 1        | 1        |
| Ripk4_j1   | 0.147076  | 0.189913        | 0.368776    | 0.522879 | 0.799141 |
| Ripk4      | 0.460627  | 0.348466        | -0.402579   | 0.281845 | 0.630397 |
| Prdm15     | 0.354919  | 0.825637        | 0           | 1        | 1        |
| Prdm15_j2  | 0.324736  | 0.20563         | 0           | 1        | 1        |
| Prdm15_j5  | 0.191961  | 0.1111          | 0           | 1        | 1        |
| C2cd2_j3   | 0.40981   | 0.432827        | 0           | 1        | 1        |

|                  |             |                 |            |           |           |
|------------------|-------------|-----------------|------------|-----------|-----------|
| C2cd2_j2         | 1.01655     | 1.79788         | 0          | 1         | 1         |
| C2cd2_j4         | 0.803652    | 1.41397         | 0          | 1         | 1         |
| Zfp295_j4        | 0.0632556   | 0.0524695       | 0          | 1         | 1         |
| Zfp295           | 0.834541    | 0.973631        | 0          | 1         | 1         |
| Zfp295           | 0.531657    | 0.154151        | 0          | 1         | 1         |
| Zfp263           | 0.476948    | 0.310574        | -0.618895  | 0.186621  | 0.527475  |
| Nat15_j4         | 1.52375     | 2.19196         | 0.524596   | 0.0754229 | 0.331468  |
| Cluap1           | 6.73791     | 6.75316         | 0.0032626  | 0.981709  | 0.994414  |
| Dnaja3_j1        | 0.0525845   | 0 -1.79769e+308 | 0.0690588  |           | 1         |
| Hmox2_j2         | 7.95694     | 7.52409         | 0          | 1         | 1         |
| Mgrn1_j5         | 1.11913     | 0.837749        | -0.417792  | 0.107962  | 0.408438  |
| Nudt16l1         | 23.0518     | 21.8584         | -0.0766927 | 0.591241  | 0.836932  |
| AK154225_j5      | 0.280246    | 0.168296        | -0.735696  | 0.158823  | 0.49326   |
| Rbfox1_j9        | 1.69194     | 0.849712        | 0          | 1         | 1         |
| Rbfox1_j10       | 31.5283     | 30.9356         | 0          | 1         | 1         |
| Abat             | 11.1682     | 10.3096         | -0.115411  | 0.258585  | 0.607374  |
| Nubp1_j2         | 5.83057     | 6.84101         | 0          | 1         | 1         |
| Nubp1_j4         | 7.15174     | 7.90622         | 0          | 1         | 1         |
| Clec16a_j3       | 1.76794     | 1.00927         | 0          | 1         | 1         |
| Clec16a_j7       | 1.9706      | 2.58634         | 0          | 1         | 1         |
| Snx29_j1         | 0.550738    | 0.27365         | -1.00903   | 0.0118746 | 0.0974303 |
| AK014704_j2      | 2.47244     | 2.69475         | 0.124219   | 0.629832  | 0.856211  |
| AK014704_j1      | 1.2255      | 1.10383         | -0.150848  | 0.672111  | 0.87616   |
| Ercc4_j1         | 0.916374    | 0.801228        | -0.193723  | 0.572372  | 0.827134  |
| Mkl2             | 0.829102    | 1.22959         | 0          | 1         | 1         |
| XLOC_012461      | 0.321523    | 0.285649        | -0.170681  | 0.829315  | 0.944936  |
| 2900011O08Rik_j2 | 38.9798     | 36.4383         | -0.0972709 | 0.40474   | 0.726779  |
| Nde1             | 0.584383    | 0.636312        | 0.122819   | 0.798275  | 0.933029  |
| Yars2            | 1.2251      | 1.44178         | 0.234954   | 0.422095  | 0.738238  |
| Yars2            | 5.32995     | 5.10788         | -0.0613965 | 0.6887    | 0.884383  |
| Mapk1_j2         | 6.9468      | 6.29388         | 0          | 1         | 1         |
| Mapk1_j1         | 32.349      | 30.423          | 0          | 1         | 1         |
| Ypel1            | 1.43832     | 1.55299         | 0.110665   | 0.486615  | 0.777731  |
| Aifm3_j2         | 0.155887    | 0 -1.79769e+308 | 0.0014371  | 0.0190759 |           |
| Aifm3            | 0.360908    | 0.332173        | -0.119697  | 0.816339  | 0.940246  |
| Lztr1            | 3.44657     | 3.33444         | -0.0477143 | 0.796498  | 0.932165  |
| mP2XM_j1         | 2.03642     | 1.43312         | 0          | 1         | 1         |
| Smpd4_j1         | 0.81168     | 1.39426         | 0          | 1         | 1         |
| Klhl22_j2        | 0.101615    | 0.311465        | 0          | 1         | 1         |
| Klhl22_j3        | 0.000872324 | 1.16186         | 0          | 1         | 1         |
| Scarf2_j4        | 0.150011    | 0.241833        | 0.688947   | 0.205518  | 0.549925  |
| Trmt2a_j1        | 1.30053     | 1.25383         | -0.0527541 | 0.767337  | 0.920619  |
| 2510002D24Rik_j1 | 0.757831    | 1.15765         | 0.611249   | 0.0721144 | 0.323001  |
| Hira_j1          | 3.12607     | 2.65491         | -0.23569   | 0.186517  | 0.527254  |
| Hira_j3          | 1.87263     | 1.48004         | -0.339431  | 0.132295  | 0.452583  |
| Hira_j4          | 1.539       | 1.52021         | -0.0177222 | 0.953641  | 0.98654   |
| Yeats2           | 0.466435    | 0.683162        | 0          | 1         | 1         |

|                  |           |            |               |           |           |
|------------------|-----------|------------|---------------|-----------|-----------|
| Yeats2_j8        | 1.99525   | 2.58333    | 0             | 1         | 1         |
| Eif2b5_j1        | 4.2417    | 6.25047    | 0             | 1         | 1         |
| Eif2b5_j2        | 4.25919   | 2.92125    | 0             | 1         | 1         |
| Dvl3             | 6.71531   | 8.17741    | 0.284189      | 0.0102636 | 0.0871771 |
| Ece2             | 5.91958   | 4.02002    | 0             | 1         | 1         |
| Ece2_j5          | 8.96462   | 8.08239    | 0             | 1         | 1         |
| Psm2_j4          | 59.1407   | 67.6069    | 0.19302       | 0.0375177 | 0.214754  |
| Eif4g1           | 2.94395   | 2.78678    | 0             | 1         | 1         |
| Polr2h_j1        | 0.81307   | 1.08835    | 0             | 1         | 1         |
| Polr2h_j2        | 1.24483   | 2.22354    | 0             | 1         | 1         |
| Ephb3            | 1.81112   | 1.61272    | -0.167387     | 0.356026  | 0.691904  |
| Vps8_j1          | 0.383289  | 0.421459   | 0.136961      | 0.863482  | 0.956634  |
| Vps8_j8          | 4.01331   | 4.60668    | 0.198935      | 0.361932  | 0.696328  |
| AK005305         | 1.36944   | 1.54912    | 0.177862      | 0.524713  | 0.800294  |
| Map3k13_j3       | 2.16642   | 2.03646    | -0.0892482    | 0.563261  | 0.822514  |
| Eif4a2_j3        | 159.125   | 146.45     | 0             | 1         | 1         |
| St6gal1_j4       | 0.384587  | 3.36747    | 0             | 1         | 1         |
| AK144897_j5      | 0.145408  | 0.0562698  | -1.36968      | 0.225306  | 0.57244   |
| Lpp_j1           | 0.0955234 | 0.105392   | 0.141839      | 0.849475  | 1         |
| Tprg_j1          | 0.281662  | 0.356113   | 0.338368      | 0.457791  | 0.760655  |
| Trp63_j1         | 0.10501   | 0.125802   | 0.260629      | 0.766206  | 1         |
| Hrasls_j1        | 0.619307  | 0.316606   | -0.967966     | 0.0388422 | 0.219754  |
| Opa1_j3          | 5.87118   | 5.11598    | 0             | 1         | 1         |
| 4632428C04Rik_j4 | 0.248341  | 0.300238   | 0             | 1         | 1         |
| 4632428C04Rik_j5 | 0.44854   | 0.928687   | 0             | 1         | 1         |
| Bdh1             | 0         | 0.222649   | 1.79769e+308  | 0.0015355 | 0.0201299 |
| Dlg1_j12         | 0.67218   | 0.00245343 | -8.0979       | 0.258008  | 0.606629  |
| Pigz_j1          | 7.87844   | 1.85726    | -2.08473      | 0         | 0         |
| Wdr53            | 1.22377   | 1.07292    | 0             | 1         | 1         |
| Wdr53            | 2.56183   | 2.79321    | 0             | 1         | 1         |
| Wdr53_j1         | 4.91355   | 4.98385    | 0             | 1         | 1         |
| Rnf168_j1        | 0.305422  | 0.393841   | 0.366809      | 0.37495   | 0.707307  |
| Tfr3_j1          | 0.365562  | 0.226449   | 0             | 1         | 1         |
| Tnk2_j2          | 0.566601  | 0.693033   | 0             | 1         | 1         |
| Tnk2_j7          | 0         | 0.682186   | 0             | 1         | 1         |
| Snx4_j4          | 7.27308   | 8.84915    | 0.282972      | 0.111261  | 0.415262  |
| Snx4_j8          | 3.66033   | 5.21581    | 0.510919      | 0.0479954 | 0.251853  |
| Zfp148_j1        | 3.74067   | 2.86813    | 0             | 1         | 1         |
| Zfp148_j5        | 1.15197   | 0.94212    | 0             | 1         | 1         |
| Heg1_j3          | 0.504058  | 0.421828   | 0             | 1         | 1         |
| Mylk_j5          | 0.421366  | 0.377014   | -0.160454     | 0.744715  | 0.910838  |
| Mylk             | 0.277081  | 0.221578   | -0.322491     | 0.560768  | 0.821232  |
| Ptplb_j2         | 0.201413  | 0          | -1.79769e+308 | 0.0453452 | 0.243807  |
| Ptplb_j4         | 0         | 0.0776789  | 1.79769e+308  | 0.0279135 | 1         |
| Ptplb_j3         | 2.96569   | 3.04083    | 0.0360994     | 0.822676  | 0.942844  |
| Sema5b_j4        | 0.546595  | 0.470819   | -0.2153       | 0.483479  | 0.77601   |
| Hspbab1          | 1.68902   | 1.93718    | 0.197775      | 0.192417  | 0.534598  |

|                  |             |           |            |           |           |
|------------------|-------------|-----------|------------|-----------|-----------|
| Parp9_j1         | 0.639398    | 0.409774  | 0          | 1         | 1         |
| Kpna1            | 4.5201      | 3.82877   | 0          | 1         | 1         |
| Iqcb1_j2         | 0.43103     | 1.22328   | 0          | 1         | 1         |
| Iqcb1_j3         | 0.391403    | 0.265606  | 0          | 1         | 1         |
| Iqcb1            | 2.58341     | 1.45894   | 0          | 1         | 1         |
| Iqcb1_j7         | 0.176491    | 0.127228  | 0          | 1         | 1         |
| Fstl1            | 217.329     | 190.734   | 0          | 1         | 1         |
| Fstl1_j1         | 457.234     | 412.265   | 0          | 1         | 1         |
| Lrrc58_j2        | 6.17532     | 5.58227   | 0          | 1         | 1         |
| Gsk3b            | 8.19957     | 6.73478   | 0          | 1         | 1         |
| Popdc2           | 0.000126788 | 0.17788   | 10.4543    | 0.849626  | 0.952228  |
| Tmem39a_j7       | 0.463864    | 0.465362  | 0.00465058 | 0.991185  | 0.997387  |
| Tmem39a_j11      | 0.663887    | 0.80073   | 0.270378   | 0.452662  | 0.757721  |
| B4galt4_j1       | 0.492472    | 0.130808  | -1.91259   | 0.0759023 | 0.332821  |
| XLOC_012597      | 1.31E-05    | 0.0998455 | 12.8925    | 0.994047  | 1         |
| Lsamp_j4         | 3.90723     | 3.37413   | 0          | 1         | 1         |
| 2610015P09Rik    | 0.194691    | 0.34398   | 0.82114    | 0.0882693 | 0.363775  |
| Spice1_j1        | 1.07935     | 1.81184   | 0.747296   | 0.0044144 | 0.0463002 |
| Ccdc80_j1        | 1.07247     | 0.510578  | 0          | 1         | 1         |
| Atg3_j1          | 8.98248     | 7.57903   | 0          | 1         | 1         |
| Atg3             | 5.67951     | 5.18713   | 0          | 1         | 1         |
| Morc1_j1         | 0.0637078   | 0.165414  | 1.37654    | 0.114985  | 0.421857  |
| Cd47_j2          | 16.8083     | 16.4125   | 0          | 1         | 1         |
| Cd47_j4          | 8.22754     | 6.80009   | 0          | 1         | 1         |
| Cblb_j2          | 0.0639093   | 0.137464  | 0          | 1         | 1         |
| Cblb_j1          | 0.488859    | 0.308782  | 0          | 1         | 1         |
| Cblb             | 0.748609    | 0.428425  | 0          | 1         | 1         |
| Rpl24_j1         | 0.195164    | 0.113482  | -0.782219  | 0.27874   | 0.627551  |
| Senp7_j2         | 0.744814    | 0.0563094 | -3.72543   | 3.54E-06  | 0.0001249 |
| Senp7_j1         | 0.0522272   | 0.85841   | 4.0388     | 7.23E-11  | 7.58E-09  |
| Senp7_j5         | 1.92933     | 1.73595   | -0.152375  | 0.587371  | 0.835002  |
| Tomm70a_j5       | 21.3248     | 19.5322   | 0          | 1         | 1         |
| Dcbl2            | 2.55874     | 3.00543   | 0          | 1         | 1         |
| Robo1_j7         | 0.300493    | 0.234409  | -0.358307  | 1         | 1         |
| Robo1_j8         | 0.676061    | 0.47398   | -0.512328  | 0.0730893 | 0.325521  |
| Usp25_j2         | 11.7972     | 10.2516   | -0.202603  | 0.0600662 | 0.288627  |
| 2810055G20Rik_j4 | 1.04        | 0.673937  | -0.6259    | 0.0835084 | 0.352296  |
| N6amt1           | 2.55631     | 2.49016   | -0.037825  | 0.879825  | 0.961537  |
| AK045112_j1      | 0.0990527   | 0.0774911 | -0.354165  | 0.762668  | 1         |
| AK045112         | 0.167329    | 0.10577   | -0.661756  | 0.497741  | 0.783786  |
| ORF63_j1         | 0.0388238   | 0.104868  | 1.43356    | 0.226053  | 1         |
| Sod1             | 1.27503     | 1.18799   | -0.102001  | 0.753174  | 0.914687  |
| 4931408A02Rik_j2 | 2.90858     | 2.64002   | -0.13977   | 0.436238  | 0.746923  |
| 4931408A02Rik_j1 | 1.23438     | 1.09467   | -0.173295  | 0.539502  | 0.808383  |
| XLOC_012677      | 0.0535473   | 0.0699912 | 0          | 1         | 1         |
| Ifnar2           | 1.4921      | 1.51114   | 0          | 1         | 1         |
| Ifnar2           | 1.69414     | 1.89603   | 0          | 1         | 1         |

|                  |           |           |               |           |           |
|------------------|-----------|-----------|---------------|-----------|-----------|
| Ifnar1_j1        | 0.4689    | 0         | -1.79769e+308 | 3.02E-18  | 8.09E-16  |
| Ifnar1_j3        | 0.709578  | 0.620265  | -0.194077     | 0.465035  | 0.764951  |
| Son_j1           | 2.66905   | 2.92134   | 0.130305      | 0.361634  | 0.696109  |
| Itn1             | 1.66395   | 1.56989   | -0.083946     | 0.505412  | 0.78827   |
| Dopey2_j6        | 4.83997   | 6.5636    | 0.43949       | 0.0001515 | 0.0030413 |
| Dopey2_j7        | 18.9807   | 21.5971   | 0.186301      | 0.0912377 | 0.371241  |
| Dopey2_j8        | 3.232     | 2.54973   | -0.342085     | 0.145095  | 0.472912  |
| Morc3_j4         | 0.804418  | 1.36938   | 0             | 1         | 1         |
| Morc3_j6         | 1.59079   | 2.14522   | 0             | 1         | 1         |
| Ttc3_j4          | 1.00516   | 0.778622  | 0             | 1         | 1         |
| Dyrk1a           | 2.11613   | 2.73469   | 0             | 1         | 1         |
| Sh3bgr           | 13.0331   | 8.36171   | -0.640313     | 1.26E-05  | 0.0003773 |
| B3galt5_j2       | 2.60909   | 1.19223   | 0             | 1         | 1         |
| Bace2_j1         | 0.213821  | 0.286834  | 0.423814      | 0.521429  | 0.798188  |
| BC056174_j1      | 1.12754   | 0.965795  | -0.223388     | 0.40266   | 0.725851  |
| 1700037C18Rik_j2 | 8.77E-05  | 0.664909  | 12.8879       | 0.964307  | 0.989999  |
| Nlrc3_j6         | 0.0332726 | 0.221763  | 2.73661       | 0.0200864 | 0.141224  |
| Slx4_j6          | 0.0683792 | 0         | -1.79769e+308 | 0.0015394 | 1         |
| Slx4_j3          | 0.183215  | 0.306096  | 0.740444      | 0.0458007 | 0.24486   |
| Trap1_j5         | 2.40134   | 2.11892   | 0             | 1         | 1         |
| Crebbp_j4        | 0.508145  | 0.695429  | 0.452662      | 1         | 1         |
| Crebbp_j6        | 0.121066  | 0.197006  | 0.702445      | 0.47565   | 0.771544  |
| Fam100a_j1       | 0.941852  | 0         | -1.79769e+308 | 2.25E-07  | 1.10E-05  |
| Anks3_j3         | 3.08773   | 3.15853   | 0.0327078     | 0.871326  | 0.959126  |
| Anks3_j4         | 5.27539   | 6.26415   | 0.247843      | 0.100397  | 0.392225  |
| Rogdi_j1         | 12.8148   | 12.341    | -0.05436      | 0.773525  | 0.923145  |
| Glyr1_j2         | 0         | 0.330587  | 0             | 1         | 1         |
| Glyr1_j1         | 12.0224   | 2.34817   | 0             | 1         | 1         |
| Nagpa_j1         | 2.28037   | 2.61092   | 0             | 1         | 1         |
| Nagpa            | 2.37093   | 2.53469   | 0             | 1         | 1         |
| Nagpa_j2         | 0.731059  | 0.827698  | 0             | 1         | 1         |
| Tmem114_j1       | 0.0507896 | 0.167671  | 1.72303       | 0.279875  | 0.628722  |
| Fam18a_j1        | 0.855298  | 1.7478    | 0             | 1         | 1         |
| Fam18a           | 21.5997   | 18.6588   | 0             | 1         | 1         |
| Dexi_j1          | 0.522868  | 0         | -1.79769e+308 | 0.0026413 | 0.0311721 |
| Zc3h7a_j1        | 2.58647   | 3.42032   | 0             | 1         | 1         |
| Zc3h7a           | 5.04417   | 5.66077   | 0             | 1         | 1         |
| Zc3h7a_j2        | 1.69744   | 1.68377   | 0             | 1         | 1         |
| Gspt1_j2         | 12.1224   | 12.723    | 0.0697647     | 0.459335  | 0.761406  |
| Cpped1_j2        | 1.25853   | 1.37838   | 0.131232      | 0.665899  | 0.873354  |
| Cpped1           | 15.3405   | 14.7937   | -0.0523592    | 0.615485  | 0.848357  |
| Parn_j2          | 0.332553  | 0         | -1.79769e+308 | 0.0002737 | 0.0049608 |
| Parn_j3          | 0.544284  | 0.674062  | 0.308521      | 0.466636  | 0.766257  |
| 2310008H04Rik_j3 | 5.81E-05  | 0.227102  | 11.9318       | 0.906238  | 0.970331  |
| Fgd4_j6          | 0.168401  | 0.0620432 | -1.44055      | 0.30346   | 0.649082  |
| Ppil2            | 0.202017  | 0.273206  | 0.435517      | 0.170942  | 0.507948  |
| Ppil2_j3         | 0         | 0.443894  | 1.79769e+308  | 0.0009048 | 0.0132118 |

|                  |           |                        |           |           |          |
|------------------|-----------|------------------------|-----------|-----------|----------|
| Ube2l3_j3        | 0.535922  | 0.327168               | -0.711992 | 0.119425  | 0.429997 |
| Ube2l3_j1        | 0.678859  | 0.693911               | 0.0316382 | 0.95583   | 0.987317 |
| Pi4ka_j1         | 11.3962   | 9.48686                | -0.264554 | 0.131787  | 0.451722 |
| Thap7_j2         | 0.154929  | 0.0958458              | -0.692821 | 0.172834  | 0.510518 |
| Thap7_j1         | 0.901099  | 1.04107                | 0.208307  | 0.180716  | 0.520555 |
| Slc7a4           | 0.235011  | 0.233423               | 0         | 1         | 1        |
| Med15_j4         | 1.66651   | 1.84912                | 0         | 1         | 1        |
| Dgcr2_j4         | 2.03688   | 1.75573                | 0         | 1         | 1        |
| Dgcr14           | 1.7689    | 2.03078                | 0.199186  | 0.380968  | 0.711636 |
| 4933432I09Rik    | 0.0651376 | 0.172665               | 0         | 1         | 1        |
| 4933432I09Rik_j3 | 0.137631  | 0.150608               | 0         | 1         | 1        |
| Zdhhc8_j2        | 2.36496   | 2.77386                | 0         | 1         | 1        |
| D16H22S680E_j1   | 8.83938   | 8.45481                | 0         | 1         | 1        |
| D16H22S680E_j3   | 0.671662  | 0.97186                | 0         | 1         | 1        |
| Comt             | 5.51768   | 6.37065                | 0         | 1         | 1        |
| Sept5_j1         | 42.5607   | 66.1365                | 0         | 1         | 1        |
| Sept5            | 140.588   | 153.885                | 0         | 1         | 1        |
| Mrpl40_j3        | 0.286196  | 0.164302               | -0.80065  | 0.358555  | 0.693913 |
| Parl             | 10.6311   | 11.8073                | 0.151385  | 0.282038  | 0.630547 |
| Abcc5_j2         | 24.6024   | 25.4739                | 0         | 1         | 1        |
| Clcn2_j1         | 0.325526  | 0.651061               | 0         | 1         | 1        |
| Clcn2_j3         | 1.19846   | 1.50956                | 0         | 1         | 1        |
| 2510009E07Rik_j3 | 1.50223   | 1.16798                | 0         | 1         | 1        |
| Tmem41a          | 5.40066   | 6.92421                | 0         | 1         | 1        |
| Tra2b_j6         | 1.41445   | 1.47574                | 0.061195  | 0.823968  | 0.943114 |
| Tra2b_j7         | 19.5847   | 21.1228                | 0.109076  | 0.339034  | 0.679309 |
| Etv5_j4          | 0.157562  | 0.166494               | 0         | 1         | 1        |
| Dgkg_j2          | 3.93216   | 3.98379                | 0         | 1         | 1        |
| Tbccd1_j4        | 0.720898  | 1.22229                | 0.761725  | 0.167427  | 0.503988 |
| Tbccd1           | 1.20546   | 1.5155                 | 0.330217  | 0.232813  | 0.580027 |
| Rfc4_j4          | 45.4175   | 41.6091                | 0         | 1         | 1        |
| AK039760_j1      | 0.796967  | 0.949341               | 0.252406  | 0.585128  | 0.833924 |
| Leprel1_j3       | 0.116128  | 0 -1.79769e+308        |           | 0.0041735 | 1        |
| Leprel1_j2       | 0.186294  | 0.189071               | 0.0213453 | 0.97599   | 0.993119 |
| Leprel1_j5       | 0.115564  | 0 -1.79769e+308        |           | 0.0129521 | 1        |
| Atp13a4_j1       | 0         | 0.0697137 1.79769e+308 |           | 0.157089  | 1        |
| AK165338_j9      | 0.223523  | 0.000198449            | -10.1374  | 0.892457  | 0.965962 |
| AK165338_j8      | 0.0838587 | 0.1115                 | 0.411005  | 0.684362  | 1        |
| Atp13a3_j2       | 0.312866  | 1.09192                | 0         | 1         | 1        |
| Tmem44_j9        | 0.0997535 | 0.130573               | 0.388418  | 0.544493  | 1        |
| Tmem44_j8        | 0         | 0.0569712 1.79769e+308 |           | 0.0291023 | 1        |
| Acap2_j5         | 0         | 0.359235               | 0         | 1         | 1        |
| Apod             | 26.3215   | 44.6014                | 0         | 1         | 1        |
| Apod             | 54.9191   | 88.4951                | 0         | 1         | 1        |
| Senp5_j2         | 0.086804  | 0.0815907              | 0         | 1         | 1        |
| Pak2_j1          | 1.88967   | 2.60454                | 0         | 1         | 1        |
| 1700021K19Rik_j4 | 3.4618    | 2.14877                | 0         | 1         | 1        |

|                  |            |           |               |           |           |
|------------------|------------|-----------|---------------|-----------|-----------|
| 1700021K19Rik    | 1.42421    | 1.32791   | 0             | 1         | 1         |
| lqcg             | 1.50762    | 1.54858   | 0             | 1         | 1         |
| AK160141_j1      | 0.0961803  | 0.297052  | 1.6269        | 0.142256  | 0.468886  |
| Umps             | 0.919168   | 0.756901  | -0.280223     | 0.35312   | 0.689667  |
| Kalrn_j12        | 0.151435   | 0.111702  | 0             | 1         | 1         |
| XLOC_012857      | 0.0995949  | 0.0585145 | -0.767276     | 0.638206  | 1         |
| Pdia5_j4         | 1.21471    | 1.4156    | 0             | 1         | 1         |
| Pdia5_j1         | 0.508022   | 1.19714   | 0             | 1         | 1         |
| Dirc2_j1         | 7.93308    | 8.60304   | 0.116966      | 0.287251  | 0.635532  |
| Parp14_j3        | 3.6204     | 3.83083   | 0.0815079     | 0.635713  | 0.858773  |
| AK144265_j1      | 160.002    | 225.51    | 0             | 1         | 1         |
| Fam162a_j1       | 22.9554    | 26.391    | 0.201212      | 0.153908  | 0.486779  |
| Slc15a2_j1       | 0          | 0.0829097 | 1.79769e+308  | 0.0761228 | 1         |
| Slc15a2_j6       | 0.17775    | 0.134679  | -0.400329     | 0.436171  | 0.746874  |
| Slc15a2          | 0.785185   | 0.474856  | -0.725543     | 0.133214  | 0.454201  |
| Gtf2e1_j2        | 1.32996    | 3.02335   | 0             | 1         | 1         |
| Gtf2e1_j3        | 2.14948    | 1.42594   | 0             | 1         | 1         |
| XLOC_012875      | 0.187292   | 0.113782  | -0.719019     | 0.354993  | 0.691013  |
| 4930455C21Rik_j3 | 0.222826   | 1.5384    | 0             | 1         | 1         |
| Arhgap31_j2      | 0.765603   | 0.350547  | -1.12699      | 0.246062  | 0.593583  |
| Arhgap31_j3      | 0.242507   | 0.150781  | -0.685574     | 0.539497  | 0.808383  |
| Arhgap31_j4      | 0.122606   | 0.258837  | 1.07801       | 0.193173  | 0.535528  |
| Gap43_j4         | 1.84348    | 4.71448   | 1.35467       | 0.0002857 | 0.0051337 |
| Qtrtd1_j4        | 0.143156   | 0.518502  | 0             | 1         | 1         |
| Zdhhc23_j4       | 0.276794   | 0.143436  | 0             | 1         | 1         |
| Atp6v1a_j2       | 62.2354    | 53.9277   | 0             | 1         | 1         |
| Boc_j1           | 0.313291   | 0.16064   | 0             | 1         | 1         |
| Boc_j3           | 0.271875   | 0.0562746 | 0             | 1         | 1         |
| Boc_j6           | 1.38369    | 1.39281   | 0             | 1         | 1         |
| Slc35a5          | 5.86516    | 4.99395   | 0             | 1         | 1         |
| Tmprss7_j3       | 0.0217496  | 0.0569713 | 1.38925       | 0.376066  | 1         |
| Tagln3_j3        | 92.8392    | 100.327   | 0             | 1         | 1         |
| Abhd10_j2        | 13.5781    | 11.3874   | 0             | 1         | 1         |
| Abhd10           | 10.3864    | 8.56342   | 0             | 1         | 1         |
| Cd96_j2          | 0          | 1.51626   | 1.79769e+308  | 2.95E-08  | 1.86E-06  |
| Cd96_j3          | 0.238586   | 0.0920245 | -1.37442      | 0.299416  | 0.646244  |
| Dzip3            | 0.673047   | 0.576119  | -0.22434      | 0.443058  | 0.751132  |
| AK135986_j2      | 0.838493   | 0.529141  | -0.664146     | 0.132313  | 0.452583  |
| Bbx_j11          | 0.428529   | 0.113409  | 0             | 1         | 1         |
| 5330426P16Rik_j3 | 4.78486    | 6.17371   | 0.367662      | 0.0319254 | 0.193644  |
| 5330426P16Rik_j5 | 0.13552    | 0         | -1.79769e+308 | 0.0044144 | 1         |
| Gm6767           | 16.3386    | 19.8315   | 0.279514      | 0.0113824 | 0.0943512 |
| AK157531_j1      | 0.0409189  | 0.0655642 | 0.680143      | 0.682586  | 1         |
| Alcam_j3         | 8.40091    | 9.9764    | 0             | 1         | 1         |
| Alcam            | 8.65373    | 8.49071   | 0             | 1         | 1         |
| Nfkbiz_j1        | 0.00236415 | 0.17436   | 6.20461       | 0.27748   | 0.62639   |
| Fam55c_j3        | 8.24255    | 7.12877   | 0             | 1         | 1         |



|                  |           |                       |             |           |           |
|------------------|-----------|-----------------------|-------------|-----------|-----------|
| Fam55c_j4        | 6.18172   | 6.83678               | 0           | 1         | 1         |
| Tfg_j1           | 5.26381   | 4.72041               | 0           | 1         | 1         |
| Nit2             | 2.14119   | 2.23703               | 0           | 1         | 1         |
| Tbc1d23_j1       | 0.631055  | 1.26691               | 0           | 1         | 1         |
| St3gal6_j4       | 0.547582  | 1.49259               | 0           | 1         | 1         |
| St3gal6_j2       | 1.79674   | 1.32468               | 0           | 1         | 1         |
| Crybg3           | 0.603744  | 0.66219               | 0.133309    | 0.70348   | 0.891491  |
| Crybg3           | 0.0916247 | 0.170267              | 0.89399     | 0.0185529 | 0.133856  |
| Epha6_j4         | 0.901961  | 1.00938               | 0.162327    | 0.581029  | 0.832     |
| 4930453N24Rik_j1 | 5.42838   | 5.41546               | -0.00343903 | 0.981966  | 0.994497  |
| Htr1f_j2         | 0.318228  | 0.900133              | 1.50008     | 0.0562752 | 0.27761   |
| Chmp2b_j2        | 2.00943   | 3.38675               | 0.753114    | 0.0031353 | 0.0357042 |
| Cadm2_j1         | 0.66645   | 0 -1.79769e+308       |             | 1.01E-27  | 3.30E-25  |
| Cadm2_j3         | 2.99332   | 2.93834               | -0.0267418  | 0.916462  | 0.973929  |
| Cadm2_j6         | 0.161197  | 0 -1.79769e+308       |             | 0.0127341 | 0.102447  |
| Robo2_j11        | 2.33695   | 1.89148               | 0           | 1         | 1         |
| Robo2_j12        | 1.11336   | 0                     | 0           | 1         | 1         |
| Robo2_j15        | 0.1943    | 0.197028              | 0.0201106   | 0.981476  | 0.994248  |
| XLOC_012946      | 2.12484   | 0.390921              | -2.4424     | 0.0129055 | 0.103541  |
| XLOC_012946      | 1.01153   | 1.23283               | 0.285434    | 0.594093  | 0.838368  |
| XLOC_012946      | 3.47073   | 3.10934               | -0.158631   | 0.645491  | 0.863342  |
| Samsn1           | 0         | 0.339771 1.79769e+308 |             | 0.0015391 | 0.0201662 |
| Samsn1_j3        | 0         | 0.083926 1.79769e+308 |             | 0.0572657 | 1         |
| Mrpl39_j2        | 5.91367   | 5.68906               | -0.0558636  | 0.755609  | 0.915717  |
| Mrpl39_j4        | 4.62313   | 5.18803               | 0.166318    | 0.426168  | 0.740955  |
| XLOC_012955      | 0.505176  | 0.123473              | -2.03259    | 0.0273667 | 0.174855  |
| App_j1           | 115.327   | 114.564               | 0           | 1         | 1         |
| Adamts5_j2       | 1.39447   | 1.24574               | 0           | 1         | 1         |
| Rnf160           | 0.318373  | 0.352874              | 0           | 1         | 1         |
| Ltn1_j1          | 1.75967   | 1.90064               | 0           | 1         | 1         |
| Cct8             | 64.4473   | 76.6754               | 0           | 1         | 1         |
| Grik1_j4         | 1.38629   | 2.15452               | 0           | 1         | 1         |
| Scaf4_j3         | 3.5499    | 3.35206               | -0.0827298  | 0.577717  | 0.829916  |
| Scaf4            | 1.68324   | 1.90137               | 0.175794    | 0.16414   | 0.500023  |
| Scaf4            | 0.23573   | 0.180079              | -0.388503   | 0.212773  | 0.557725  |
| Urb1_j3          | 0.798635  | 0.911889              | 0.191321    | 0.512495  | 0.792284  |
| Urb1_j4          | 0.0613148 | 0.0324155             | -0.919551   | 0.358137  | 1         |
| Synj1_j10        | 4.1545    | 0.684435              | 0           | 1         | 1         |
| Synj1_j19        | 1.43312   | 0.420722              | 0           | 1         | 1         |
| Synj1_j18        | 0.0607586 | 0                     | 0           | 1         | 1         |
| Synj1_j4         | 0.675786  | 0.741452              | 0           | 1         | 1         |
| Gcfc1_j2         | 0.686532  | 0.946323              | 0           | 1         | 1         |
| Tmem50b_j4       | 1.392     | 0.607224              | 0           | 1         | 1         |
| Gart             | 9.42228   | 10.1887               | 0.112822    | 0.314538  | 0.658635  |
| Donson_j4        | 0.298665  | 0.133622              | -1.16037    | 0.109574  | 0.41203   |
| Cryzl1_j2        | 8.44036   | 7.96483               | -0.0836608  | 0.55772   | 0.819799  |
| Runx1_j1         | 2.78178   | 1.00777               | 0           | 1         | 1         |

|             |           |           |               |           |           |
|-------------|-----------|-----------|---------------|-----------|-----------|
| Setd4_j1    | 0.0653583 | 0         | -1.79769e+308 | 0.0324366 | 1         |
| Setd4_j2    | 6.44E-05  | 0.0728714 | 10.1451       | 0.934902  | 1         |
| Setd4_j7    | 0         | 0.0561299 | 1.79769e+308  | 0.131872  | 1         |
| Hlcs_j1     | 0.30961   | 0.133136  | 0             | 1         | 1         |
| Hmgn1       | 2.2746    | 3.09725   | 0             | 1         | 1         |
| C2cd2_j5    | 0         | 0.578049  | 0             | 1         | 1         |
| C2cd2_j6    | 0.0777135 | 0         | 0             | 1         | 1         |
| C2cd2_j1    | 2.63466   | 2.11599   | 0             | 1         | 1         |
| Zfp295_j3   | 0.0556767 | 0.104888  | 0             | 1         | 1         |
| Zfp174_j1   | 0.113853  | 0.0332443 | -1.77599      | 0.204958  | 1         |
| Nat15_j2    | 1.91453   | 2.99469   | 0.645416      | 0.0056632 | 0.0558745 |
| Dnaja3_j2   | 4.92446   | 5.03579   | 0.0322508     | 0.872313  | 0.959654  |
| Hmox2_j1    | 21.9832   | 22.4115   | 0             | 1         | 1         |
| Hmox2       | 32.2912   | 31.2503   | 0             | 1         | 1         |
| Sec14l5_j4  | 0.0681658 | 0.0566101 | -0.267989     | 0.737696  | 1         |
| Sec14l5_j11 | 0.125744  | 0.124339  | -0.0162214    | 0.977999  | 1         |
| Alg1_j1     | 6.31121   | 7.46436   | 0             | 1         | 1         |
| Rbfox1_j4   | 0.0984927 | 0.0510631 | -0.947736     | 0.594463  | 1         |
| Rbfox1_j13  | 0.0524445 | 0         | 0             | 1         | 1         |
| Clec16a_j2  | 2.47895   | 0.919403  | 0             | 1         | 1         |
| Clec16a_j8  | 0.0537815 | 0         | 0             | 1         | 1         |
| Shisa9      | 0.0693431 | 0.180807  | 1.38263       | 0.0241942 | 0.160606  |
| Rrn3_j1     | 16.8903   | 17.136    | 0.0208331     | 0.837863  | 0.948309  |
| Abcc1_j1    | 0.362881  | 0.0879311 | -2.04505      | 7.63E-07  | 3.29E-05  |
| Snai2       | 0.113925  | 0.42956   | 1.91477       | 0.0018263 | 0.0232422 |
| Snai2_j3    | 0.0637667 | 0         | -1.79769e+308 | 0.0346785 | 1         |
| Prkdc_j2    | 0.0588578 | 0.0232311 | 0             | 1         | 1         |
| Top3b_j3    | 0.536622  | 0.127859  | -2.06935      | 5.60E-06  | 0.0001868 |
| Ydjc_j1     | 1.63766   | 3.58482   | 0             | 1         | 1         |
| Ydjc_j2     | 1.53939   | 3.7548    | 0             | 1         | 1         |
| Ydjc_j3     | 3.88872   | 4.98075   | 0             | 1         | 1         |
| Hic2        | 0.588641  | 0.527022  | -0.159524     | 0.43003   | 0.743005  |
| Crkl_j2     | 7.25137   | 7.50674   | 0             | 1         | 1         |
| Aifm3_j7    | 1.11512   | 0.696644  | -0.678709     | 0.0194173 | 0.138091  |
| Lztr1_j5    | 1.44771   | 0.741435  | -0.965384     | 0.005431  | 0.0540236 |
| Klhl22      | 9.09624   | 8.69563   | 0             | 1         | 1         |
| Scarf2      | 0.202095  | 0.139127  | -0.538631     | 0.413046  | 0.73195   |
| Scarf2_j3   | 0.0796788 | 0.0165987 | -2.26313      | 0.17801   | 1         |
| Trmt2a_j2   | 6.05975   | 5.39572   | -0.167442     | 0.327311  | 0.670248  |
| Arvcf_j1    | 0.149941  | 0.0456123 | 0             | 1         | 1         |
| Arvcf_j2    | 0.78025   | 0.898641  | 0             | 1         | 1         |
| Gnb1l_j1    | 0.845695  | 0.75391   | -0.165747     | 0.546477  | 0.81297   |
| Gnb1l       | 0.941494  | 0.594996  | -0.662072     | 0.0181609 | 0.131804  |
| Klhl24_j1   | 0.591588  | 0.653286  | 0             | 1         | 1         |
| Yeats2      | 0.234668  | 0.0862821 | 0             | 1         | 1         |
| Yeats2_j6   | 2.02317   | 1.80037   | 0             | 1         | 1         |
| Ap2m1_j5    | 41.807    | 45.024    | 0.106949      | 0.332705  | 0.67386   |

|                  |           |                 |            |           |           |
|------------------|-----------|-----------------|------------|-----------|-----------|
| Abcf3_j1         | 5.59255   | 6.84966         | 0.292527   | 0.0067887 | 0.0642713 |
| Vwa5b2_j1        | 0.278044  | 0.175473        | -0.664059  | 0.0227288 | 0.153944  |
| Ece2_j1          | 0         | 0.0605281       | 0          | 1         | 1         |
| Psm2_j3          | 33.9723   | 33.3873         | -0.02506   | 0.782493  | 0.926499  |
| Eif4g1_j2        | 23.3001   | 20.8796         | 0          | 1         | 1         |
| Eif4g1_j4        | 43.1673   | 49.8676         | 0          | 1         | 1         |
| Chrd_j1          | 0.0448232 | 0.0883065       | 0.978274   | 0.371565  | 1         |
| Chrd_j3          | 0.0967835 | 0.0631601       | -0.615748  | 0.587503  | 1         |
| Chrd_j4          | 0.101138  | 9.72E-06        | -13.3444   | 0.991108  | 1         |
| Vps8             | 4.5582    | 4.74714         | 0.0585921  | 0.647957  | 0.864358  |
| Map3k13_j2       | 0.0733968 | 0 -1.79769e+308 |            | 3.70E-05  | 1         |
| Hrg_j2           | 0.205688  | 0.140234        | -0.552626  | 0.448862  | 0.755217  |
| Hrg_j1           | 0.0596557 | 0 -1.79769e+308 |            | 0.0621076 | 1         |
| Eif4a2_j2        | 66.1305   | 65.3819         | 0          | 1         | 1         |
| Lpp_j2           | 0.134235  | 0.127225        | -0.077383  | 0.955292  | 1         |
| Lpp_j3           | 0.152992  | 0 -1.79769e+308 |            | 0.0212851 | 0.146996  |
| Hrasls_j2        | 0.247918  | 0 -1.79769e+308 |            | 1.96E-05  | 0.0005463 |
| Opa1_j4          | 0.0469313 | 0               | 0          | 1         | 1         |
| 4632428C04Rik_j1 | 1.01149   | 1.15587         | 0          | 1         | 1         |
| Dlg1_j5          | 0.210205  | 0.17969         | -0.226285  | 0.665379  | 0.873092  |
| Dlg1_j2          | 0.327406  | 0.575651        | 0.814114   | 0.0178527 | 0.130172  |
| Dlg1_j6          | 0.481026  | 0.19608         | -1.29467   | 0.0070196 | 0.0659957 |
| Dlg1_j10         | 0.197541  | 0.110611        | -0.836653  | 0.349965  | 0.687527  |
| Pcyt1a           | 7.64529   | 6.03358         | 0          | 1         | 1         |
| Tnk2_j3          | 0.964204  | 1.11159         | 0          | 1         | 1         |
| Tnk2_j4          | 0.167731  | 0               | 0          | 1         | 1         |
| Tnk2_j8          | 5.13269   | 0.964994        | 0          | 1         | 1         |
| Lrch3_j2         | 3.00291   | 3.88923         | 0          | 1         | 1         |
| Osbpl11_j2       | 1.48972   | 0.685922        | -1.11893   | 0.0001571 | 0.0031363 |
| Snx4_j6          | 4.98931   | 3.067           | -0.702013  | 0.0010843 | 0.0152202 |
| Snx4_j5          | 1.82907   | 3.19672         | 0.805481   | 0.0004924 | 0.0080389 |
| Heg1_j2          | 0.502681  | 0.545032        | 0          | 1         | 1         |
| Itgb5_j2         | 1.1044    | 0.844085        | -0.387805  | 0.465468  | 0.765392  |
| Ccdc14_j6        | 0.154147  | 0.000318197     | -8.92017   | 0.76868   | 0.921133  |
| Mylk_j2          | 0.170366  | 0.0885039       | -0.944824  | 0.433162  | 0.744614  |
| Sema5b_j3        | 0.10702   | 0 -1.79769e+308 |            | 0.0001058 | 1         |
| Kpna1_j3         | 8.68217   | 9.99229         | 0          | 1         | 1         |
| 2010005H15Rik    | 0.834005  | 2.01572         | 1.27316    | 0.019376  | 0.137896  |
| Golgb1_j2        | 0.613992  | 0.22875         | 0          | 1         | 1         |
| Golgb1_j1        | 0.273015  | 0.294128        | 0          | 1         | 1         |
| Golgb1_j7        | 11.3415   | 12.7579         | 0          | 1         | 1         |
| Polq_j2          | 0.27232   | 0.264157        | -0.0439039 | 0.95235   | 0.986229  |
| Polq_j3          | 0.121594  | 0.169306        | 0.477561   | 0.403966  | 0.72656   |
| XLOC_012587      | 0.134935  | 0.13936         | 0          | 1         | 1         |
| Gpr156_j1        | 0.215887  | 0.0646522       | -1.73951   | 0.0188399 | 0.135332  |
| Gpr156_j2        | 0.297071  | 0.170739        | -0.799017  | 0.0976812 | 0.386262  |
| Tmem39a_j2       | 0.69661   | 0.356104        | -0.968054  | 0.0182494 | 0.132234  |

|                  |           |                 |            |           |           |
|------------------|-----------|-----------------|------------|-----------|-----------|
| Tmem39a_j1       | 0.156735  | 0.00220418      | -6.15194   | 0.364942  | 0.698811  |
| B4galt4          | 0.137028  | 0.462397        | 1.75466    | 0.0364345 | 0.211083  |
| XLOC_012597      | 0.0950661 | 0 -1.79769e+308 |            | 0.0557272 | 1         |
| Lsamp_j1         | 0.48366   | 0.264001        | -0.873449  | 0.340591  | 0.680526  |
| Lsamp_j2         | 0.10898   | 0 -1.79769e+308 |            | 0.0755819 | 1         |
| Ccdc80           | 0.358089  | 0.518396        | 0          | 1         | 1         |
| Atg3_j3          | 7.66734   | 10.3361         | 0          | 1         | 1         |
| XLOC_012612      | 0.0545571 | 0 -1.79769e+308 |            | 0.113511  | 1         |
| XLOC_012612      | 0.173295  | 0.173285        | -9.08E-05  | 0.999829  | 0.999918  |
| XLOC_012623      | 0.160239  | 0.126592        | -0.340045  | 0.617267  | 0.849431  |
| Cd47             | 0.441058  | 0.274227        | 0          | 1         | 1         |
| Cd47_j1          | 0.891584  | 1.13717         | 0          | 1         | 1         |
| Cd47_j3          | 2.29508   | 0.914977        | 0          | 1         | 1         |
| XLOC_012625      | 0.185745  | 0.0642639       | -1.53124   | 0.155806  | 0.489025  |
| Senp7            | 1.99174   | 1.35807         | -0.552472  | 0.0037427 | 0.0409191 |
| Abi3bp_j1        | 0.124771  | 0.129441        | 0          | 1         | 1         |
| Tomm70a_j3       | 38.0016   | 38.0762         | 0          | 1         | 1         |
| Gabrr3_j1        | 0.629811  | 0.340397        | -0.887699  | 0.0174858 | 0.128265  |
| Robo1_j1         | 0.731467  | 0.773149        | 0.0799529  | 0.729848  | 0.90454   |
| Robo1            | 0.490249  | 0.2283          | -1.10258   | 0.0006667 | 0.0103297 |
| XLOC_012658      | 0.1201    | 0.0476672       | -1.33316   | 0.153747  | 1         |
| Cxadr_j3         | 0.215022  | 0.0783486       | -1.4565    | 0.0326774 | 0.196609  |
| Sod1_j2          | 0.0762751 | 0.148129        | 0.95757    | 0.396239  | 1         |
| AK090163_j2      | 0.139796  | 0 -1.79769e+308 |            | 0.0005951 | 0.0094247 |
| 4931408A02Rik_j5 | 0.209513  | 0.148466        | -0.496906  | 0.219569  | 0.566075  |
| Mrps6_j1         | 32.3339   | 31.3473         | -0.0447083 | 0.731912  | 0.905184  |
| Fam165b_j1       | 1.96907   | 3.26551         | 0.729796   | 0.153692  | 0.486411  |
| Clic6            | 0.120024  | 0.195111        | 0.700967   | 0.216256  | 0.562346  |
| XLOC_012688      | 0.335693  | 0.156264        | 0          | 1         | 1         |
| XLOC_012689      | 0.330956  | 0.196101        | -0.75504   | 0.147196  | 0.475739  |
| Cbr3             | 6.36701   | 7.71349         | 0.276768   | 0.0727733 | 0.324622  |
| Dopey2_j3        | 0.0969857 | 0 -1.79769e+308 |            | 1.85E-05  | 1         |
| Chaf1b_j2        | 0.175879  | 0.328031        | 0.899246   | 0.146465  | 0.474782  |
| Ttc3_j7          | 7.51376   | 6.44104         | 0          | 1         | 1         |
| Dyrk1a_j2        | 3.3134    | 3.50969         | 0          | 1         | 1         |
| Dyrk1a_j4        | 1.95864   | 2.62691         | 0          | 1         | 1         |
| Dyrk1a           | 0.535617  | 0.129441        | 0          | 1         | 1         |
| Wrb_j1           | 10.9676   | 11.28           | 0          | 1         | 1         |
| Wrb_j2           | 0         | 2.56956         | 0          | 1         | 1         |
| XLOC_012704      | 0.142002  | 0.0401945       | -1.82084   | 0.0690009 | 0.314885  |
| Mx2_j2           | 0.26796   | 0 -1.79769e+308 |            | 6.66E-07  | 2.92E-05  |
| Mx2_j8           | 0.316974  | 0.20586         | -0.622702  | 0.380303  | 0.711279  |
| Slx4_j5          | 0.591234  | 0.764965        | 0.371664   | 0.195051  | 0.537349  |
| Slx4_j7          | 0.144216  | 0.0409064       | -1.81783   | 0.031149  | 0.190303  |
| Slx4_j9          | 0.18302   | 0 -1.79769e+308 |            | 5.68E-09  | 4.17E-07  |
| Trap1_j6         | 8.24115   | 7.7883          | 0          | 1         | 1         |
| Crebbp_j1        | 0.14462   | 0 -1.79769e+308 |            | 5.70E-10  | 4.96E-08  |

|                  |           |                 |            |           |           |
|------------------|-----------|-----------------|------------|-----------|-----------|
| Adcy9_j2         | 1.54836   | 0.971503        | 0          | 1         | 1         |
| Tcfap4_j1        | 0.319802  | 2.12E-05        | -13.8832   | 0.981311  | 0.994152  |
| Coro7_j2         | 4.15111   | 5.26725         | 0          | 1         | 1         |
| Coro7_j8         | 0.511937  | 0.595841        | 0          | 1         | 1         |
| Coro7_j9         | 5.75365   | 6.47702         | 0          | 1         | 1         |
| Nmral1_j1        | 0.14572   | 0.553723        | 1.92596    | 0.0245772 | 0.162411  |
| Anks3_j1         | 0.110679  | 0.128449        | 0.21481    | 0.620206  | 1         |
| Anks3_j2         | 0.672146  | 0.659887        | -0.0265561 | 0.885484  | 0.963679  |
| Glyr1_j6         | 8.17058   | 9.75639         | 0          | 1         | 1         |
| Glyr1_j7         | 5.40697   | 14.9643         | 0          | 1         | 1         |
| Carhsp1_j3       | 0.159321  | 0.221817        | 0          | 1         | 1         |
| Usp7_j1          | 6.43464   | 4.64118         | 0          | 1         | 1         |
| Usp7_j4          | 19.7291   | 19.8267         | 0          | 1         | 1         |
| Fam18a_j5        | 0.171576  | 0               | 0          | 1         | 1         |
| Fam18a_j4        | 1.58619   | 1.65776         | 0          | 1         | 1         |
| Fam18a_j3        | 0.985502  | 2.06356         | 0          | 1         | 1         |
| Dexi_j3          | 38.2678   | 33.6524         | -0.185422  | 0.150039  | 0.479926  |
| Socs1_j1         | 0.481868  | 1.11834         | 1.21464    | 0.0143054 | 0.111143  |
| Txndc11_j2       | 33.8938   | 34.0524         | 0.00673597 | 0.939738  | 0.981682  |
| Gspt1_j1         | 2.87356   | 2.28136         | -0.332941  | 0.0296806 | 0.184452  |
| XLOC_012752      | 0.11198   | 0.0835055       | -0.423294  | 0.524457  | 1         |
| Cpped1_j3        | 1.11733   | 1.03068         | -0.11646   | 0.711146  | 0.894998  |
| Parn_j4          | 0.153679  | 0 -1.79769e+308 | 0.0048762  | 0.0048762 | 0.0497721 |
| Pdxdc1_j1        | 17.7381   | 16.7712         | 0          | 1         | 1         |
| 4921513D23Rik_j1 | 0.849852  | 1.1479          | 0          | 1         | 1         |
| 4921513D23Rik_j2 | 1.1499    | 0.657473        | 0          | 1         | 1         |
| Dnm1l_j4         | 0.684852  | 0.061202        | 0          | 1         | 1         |
| Dnm1l_j5         | 4.76935   | 4.14312         | 0          | 1         | 1         |
| Fgd4_j3          | 0.177181  | 0.233592        | 0.398767   | 0.676645  | 0.878369  |
| Fgd4_j5          | 0.199409  | 0 -1.79769e+308 | 8.05E-06   | 8.05E-06  | 0.0002558 |
| Ccdc116_j1       | 0.214108  | 0.207062        | -0.0482777 | 0.934288  | 0.979958  |
| Ccdc116_j2       | 0.23821   | 0.236525        | 0          | 1         | 1         |
| Pi4ka_j2         | 12.595    | 16.1417         | 0.357946   | 0.0185009 | 0.133568  |
| Pi4ka_j3         | 0.875126  | 0.850953        | -0.0404109 | 0.877781  | 0.96086   |
| Pi4ka_j5         | 0.82511   | 0.743354        | -0.150537  | 0.540635  | 0.808936  |
| Pi4ka_j4         | 0.163493  | 0.235056        | 0.523779   | 0.234787  | 0.582023  |
| Thap7            | 0.454473  | 0.466522        | 0.0377488  | 0.863215  | 0.956634  |
| Slc7a4_j3        | 0.0805867 | 0               | 0          | 1         | 1         |
| Med15_j9         | 0.213782  | 0               | 0          | 1         | 1         |
| Dgcr2_j3         | 1.16904   | 1.04769         | 0          | 1         | 1         |
| Prodh_j1         | 0.205567  | 0.160265        | -0.359143  | 0.420931  | 0.737135  |
| Prodh            | 0.562548  | 0.711378        | 0.338641   | 0.0944284 | 0.378747  |
| Zdhhc8_j6        | 21.7634   | 23.9374         | 0          | 1         | 1         |
| D16H22S680E_j2   | 21.7065   | 20.3902         | 0          | 1         | 1         |
| Comt_j4          | 0.0805005 | 0.0804531       | 0          | 1         | 1         |
| A930003A15Rik    | 0.125938  | 0.397242        | 1.6573     | 0.0335865 | 0.200268  |
| Klhl6            | 0.0756141 | 0.448027        | 2.56686    | 0.0003438 | 0.0059619 |

|                  |          |                 |              |           |           |
|------------------|----------|-----------------|--------------|-----------|-----------|
| Parl_j3          | 2.9584   | 3.95727         | 0.419691     | 0.0976754 | 0.386262  |
| Parl_j2          | 1.01879  | 0.312325        | -1.70573     | 0.0112563 | 0.093522  |
| Abcc5_j4         | 1.747    | 2.20649         | 0            | 1         | 1         |
| Clcn2_j5         | 0.725918 | 0.619374        | 0            | 1         | 1         |
| Liph_j4          | 0.120477 | 0.15955         | 0.405259     | 0.62553   | 0.853954  |
| Igf2bp2_j6       | 0.159114 | 0.0471014       | -1.75622     | 0.0931676 | 0.375592  |
| Igf2bp2_j7       | 0.108593 | 0 -1.79769e+308 |              | 0.000565  | 1         |
| Igf2bp2          | 0.189345 | 0.571183        | 1.59294      | 8.39E-05  | 0.0018458 |
| Tra2b_j8         | 0.162094 | 0.319316        | 0.978151     | 0.0145615 | 0.112504  |
| Etv5_j3          | 0.130471 | 0.0678519       | 0            | 1         | 1         |
| Etv5_j7          | 1.09189  | 1.29879         | 0            | 1         | 1         |
| Dgkg_j4          | 0.159224 | 0               | 0            | 1         | 1         |
| Dgkg_j5          | 2.82337  | 2.35422         | 0            | 1         | 1         |
| Dgkg             | 2.77024  | 2.42734         | 0            | 1         | 1         |
| Tbccd1_j1        | 0.171022 | 0 -1.79769e+308 |              | 0.000414  | 0.0069618 |
| Rfc4_j3          | 1.01004  | 0.757035        | 0            | 1         | 1         |
| Bcl6_j3          | 3.29853  | 4.23664         | 0            | 1         | 1         |
| XLOC_012820      | 2.39883  | 2.39789         | -0.000565065 | 0.998171  | 0.999228  |
| Fgf12_j3         | 0.458817 | 0.891937        | 0            | 1         | 1         |
| Fgf12_j6         | 0.233722 | 0.14644         | 0            | 1         | 1         |
| AK165338_j5      | 0.16097  | 0.0226053       | -2.83206     | 0.16513   | 0.501501  |
| Atp13a3_j5       | 0.14728  | 0               | 0            | 1         | 1         |
| Tmem44           | 0.214266 | 0.105987        | -1.01552     | 0.0855282 | 0.35716   |
| Acap2_j3         | 0.237383 | 0               | 0            | 1         | 1         |
| Apod_j1          | 209.847  | 349.812         | 0            | 1         | 1         |
| Lrrc33           | 0.296968 | 0.856145        | 1.52755      | 0.0002714 | 0.0049278 |
| 1700021K19Rik_j3 | 1.78898  | 0.910587        | 0            | 1         | 1         |
| Iqcg_j3          | 0.277884 | 0.254605        | 0            | 1         | 1         |
| Kalrn_j1         | 0.293729 | 0.02576         | 0            | 1         | 1         |
| Sec22a_j1        | 3.97244  | 3.82805         | -0.0534125   | 0.821758  | 0.94254   |
| Casr_j2          | 0.152966 | 0.0329073       | 0            | 1         | 1         |
| Casr             | 0.256354 | 0.168686        | 0            | 1         | 1         |
| Slc15a2_j2       | 0.684875 | 0.452761        | -0.59709     | 0.159512  | 0.493951  |
| Slc15a2_j3       | 0.361072 | 0.114643        | -1.65514     | 0.0003852 | 0.006577  |
| Stxbp5l_j3       | 0.207608 | 0.0508282       | 0            | 1         | 1         |
| Stxbp5l          | 0.220472 | 0.151445        | 0            | 1         | 1         |
| Stxbp5l_j2       | 0.95939  | 0.515005        | 0            | 1         | 1         |
| Pla1a_j1         | 0.110933 | 0.0415159       | -1.41796     | 0.495735  | 1         |
| Ktelc1_j1        | 2.07504  | 2.0726          | 0            | 1         | 1         |
| Ktelc1_j3        | 0.346835 | 0.267145        | 0            | 1         | 1         |
| Qtrtd1_j6        | 0.867796 | 0.636864        | 0            | 1         | 1         |
| Qtrtd1_j5        | 1.02604  | 1.33595         | 0            | 1         | 1         |
| Zdhhc23_j5       | 0.690984 | 0.699237        | 0            | 1         | 1         |
| Zdhhc23_j2       | 0.465286 | 0.564342        | 0            | 1         | 1         |
| Zdhhc23_j6       | 0.424009 | 0               | 0            | 1         | 1         |
| Gramd1c_j1       | 0.39728  | 0.344242        | -0.206734    | 0.653456  | 0.867469  |
| Gramd1c_j2       | 0.16065  | 0 -1.79769e+308 |              | 8.90E-05  | 0.0019432 |

|                  |           |                 |           |           |          |
|------------------|-----------|-----------------|-----------|-----------|----------|
| Gramd1c_j3       | 0.124213  | 0.0200434       | -2.63162  | 0.056669  | 1        |
| Gramd1c_j4       | 0.0565908 | 0.195247        | 1.78666   | 0.0181616 | 0.131804 |
| Atp6v1a_j3       | 1.65403   | 0.579979        | 0         | 1         | 1        |
| Boc_j8           | 0.38165   | 0.245287        | 0         | 1         | 1        |
| Boc              | 3.0955    | 2.57428         | 0         | 1         | 1        |
| Gtpbp8_j1        | 0.662055  | 0.774172        | 0.225703  | 0.384024  | 0.71322  |
| Tagln3_j7        | 4.86509   | 0               | 0         | 1         | 1        |
| Phldb2           | 0.308984  | 0.364413        | 0         | 1         | 1        |
| Cd96_j4          | 0.0873427 | 0 -1.79769e+308 | 0.0593414 |           | 1        |
| Cd96_j6          | 0.506655  | 0.626942        | 0.307329  | 0.679629  | 0.879568 |
| Pvrl3_j1         | 0.586949  | 0.643145        | 0         | 1         | 1        |
| Pvrl3_j4         | 0.58199   | 0.873346        | 0         | 1         | 1        |
| XLOC_012906      | 0.307965  | 0.254856        | -0.273081 | 0.564151  | 0.823143 |
| Dzip3_j1         | 0.143447  | 0.0691084       | -1.05358  | 0.253287  | 0.601307 |
| AK045242_j1      | 0.13344   | 0.13835         | 0.0521297 | 0.948331  | 1        |
| Bbx_j5           | 0.352923  | 0.0001585       | 0         | 1         | 1        |
| Bbx_j7           | 0.145493  | 0               | 0         | 1         | 1        |
| AK084744         | 0.197846  | 0.0901011       | -1.13476  | 0.467827  | 0.766747 |
| Alcam_j5         | 0.12774   | 0               | 0         | 1         | 1        |
| Nfkbiz           | 0.55615   | 0.809691        | 0.541897  | 0.0389193 | 0.220001 |
| Nfkbiz           | 0.18829   | 0.203471        | 0.111866  | 0.829586  | 0.944941 |
| Fam55c           | 4.28914   | 2.61059         | 0         | 1         | 1        |
| Fam55c_j5        | 0.44893   | 0               | 0         | 1         | 1        |
| Cep97_j1         | 1.09231   | 1.10549         | 0         | 1         | 1        |
| AK015492         | 0.205354  | 0.122613        | -0.744002 | 0.300226  | 0.646818 |
| St3gal6_j1       | 0.370699  | 0.301585        | 0         | 1         | 1        |
| St3gal6          | 7.15726   | 5.41645         | 0         | 1         | 1        |
| Nsun3_j1         | 0.156549  | 0.0996913       | 0         | 1         | 1        |
| Zfp654_j4        | 1.00575   | 0.651549        | 0         | 1         | 1        |
| Robo2_j9         | 1.02034   | 0.0544546       | 0         | 1         | 1        |
| Robo2_j10        | 1.74761   | 2.14733         | 0         | 1         | 1        |
| Robo1            | 1.41575   | 1.85926         | 0.393164  | 0.148479  | 0.477336 |
| XLOC_012946      | 0.345038  | 0.142961        | -1.27113  | 0.308904  | 0.653779 |
| Nrip1            | 2.3028    | 2.41103         | 0         | 1         | 1        |
| D16Ertd472e      | 0.0855517 | 0.0327864       | -1.3837   | 0.382182  | 1        |
| D16Ertd472e      | 0.142264  | 0.0129142       | -3.46154  | 0.144017  | 0.471055 |
| Mrpl39_j1        | 0.166959  | 0 -1.79769e+308 | 0.0027358 | 0.0320632 |          |
| App_j4           | 6.94602   | 0               | 0         | 1         | 1        |
| Ltn1_j4          | 3.83665   | 3.14709         | 0         | 1         | 1        |
| Ltn1             | 3.74212   | 3.1934          | 0         | 1         | 1        |
| Grik1_j1         | 34.8686   | 29.1142         | 0         | 1         | 1        |
| Tiam1_j1         | 0.141796  | 0 -1.79769e+308 | 9.30E-05  | 0.0020197 |          |
| 1110004E09Rik_j2 | 3.00995   | 3.24256         | 0.107393  | 0.651302  | 0.866122 |
| Synj1_j8         | 10.4608   | 7.96316         | 0         | 1         | 1        |
| Synj1_j14        | 0.717748  | 0.313984        | 0         | 1         | 1        |
| Synj1_j13        | 2.85898   | 1.98748         | 0         | 1         | 1        |
| Gcfc1_j4         | 0.159561  | 0.0658473       | 0         | 1         | 1        |

|                  |           |           |               |           |           |
|------------------|-----------|-----------|---------------|-----------|-----------|
| Gcfc1_j3         | 0.0244583 | 0.157592  | 0             | 1         | 1         |
| Tmem50b_j2       | 5.55031   | 0.018073  | 0             | 1         | 1         |
| Gart             | 2.56128   | 2.4245    | -0.0791789    | 0.694     | 0.887051  |
| Donson_j1        | 0.264198  | 0.222957  | -0.244858     | 0.41128   | 0.730655  |
| Rcan1_j2         | 0.457464  | 0.178603  | 0             | 1         | 1         |
| XLOC_012983      | 0.168353  | 0.0747744 | 0             | 1         | 1         |
| XLOC_012983      | 0.301789  | 0.128901  | 0             | 1         | 1         |
| XLOC_012983      | 0.128768  | 0.0447107 | 0             | 1         | 1         |
| Setd4_j6         | 0.364993  | 0.631077  | 0.789946      | 0.0834746 | 0.352255  |
| Setd4_j9         | 0.191477  | 0.310881  | 0.699188      | 0.287049  | 0.635532  |
| Setd4_j10        | 0.152267  | 0.217696  | 0.515712      | 0.429605  | 0.742849  |
| Setd4_j14        | 0.116984  | 0         | -1.79769e+308 | 0.0270501 | 1         |
| XLOC_012990      | 0.0952658 | 0.0562322 | -0.760562     | 0.624204  | 1         |
| Brwd1_j2         | 1.19358   | 1.19534   | 0             | 1         | 1         |
| Brwd1_j4         | 0.244357  | 0.159651  | 0             | 1         | 1         |
| Brwd1_j6         | 1.52816   | 1.32369   | 0             | 1         | 1         |
| Lca5l_j1         | 0.0685508 | 0.0510943 | -0.424012     | 0.659285  | 1         |
| Dscam_j10        | 0.156262  | 0.287985  | 0             | 1         | 1         |
| Dscam_j9         | 0.0799195 | 0         | 0             | 1         | 1         |
| Dscam_j8         | 0.605984  | 0.253212  | 0             | 1         | 1         |
| Ripk4_j2         | 0.17824   | 0         | -1.79769e+308 | 1.29E-05  | 0.0003861 |
| Prdm15_j6        | 0.227395  | 0.112053  | 0             | 1         | 1         |
| Prdm15_j1        | 0.6764    | 0.596758  | 0             | 1         | 1         |
| C2cd2_j7         | 0.63087   | 0.9208    | 0             | 1         | 1         |
| Zfp295_j2        | 0.275842  | 0.0900853 | 0             | 1         | 1         |
| B230307C23Rik_j1 | 0.206285  | 0.385666  | 0.902709      | 0.0500308 | 0.258422  |
| Zfp263_j1        | 0.425428  | 0.497164  | 0.224808      | 0.575093  | 0.828142  |
| AK154225_j2      | 0.610662  | 0.850225  | 0.477471      | 0.103929  | 0.399846  |
| AK154225_j1      | 0.464935  | 0.318189  | -0.547144     | 0.167249  | 0.503637  |
| Sec14l5_j2       | 0.135329  | 0.132965  | -0.025426     | 0.959088  | 1         |
| Sec14l5_j1       | 2.58E-05  | 0.086769  | 11.7163       | 0.926011  | 1         |
| Rbfox1_j1        | 0.10675   | 0.190068  | 0.832273      | 0.414294  | 0.732813  |
| Rbfox1_j3        | 0.505342  | 0.687815  | 0.444763      | 0.360831  | 0.695583  |
| Rbfox1_j5        | 0.484443  | 0.371323  | -0.383653     | 0.683453  | 0.881547  |
| Rbfox1_j12       | 1.46215   | 1.12752   | 0             | 1         | 1         |
| XLOC_012453      | 0.14211   | 0.152493  | 0.10174       | 0.893417  | 0.966325  |
| Snx29_j5         | 1.40958   | 1.68449   | 0.257043      | 0.135057  | 0.457301  |
| Snx29_j8         | 0         | 0.395871  | 1.79769e+308  | 2.55E-06  | 9.42E-05  |
| Shisa9           | 0.0532227 | 0.309013  | 2.53756       | 0.0485537 | 0.253751  |
| XLOC_012459      | 0.0260028 | 0.169855  | 2.70757       | 0.0140946 | 0.110014  |
| Mpv17l           | 1.25317   | 1.86635   | 0             | 1         | 1         |
| Mpv17l           | 0.231704  | 0.207545  | 0             | 1         | 1         |
| Mpv17l           | 2.28213   | 1.55134   | 0             | 1         | 1         |
| Snai2_j1         | 0         | 0.0736463 | 1.79769e+308  | 0.0718087 | 1         |
| Prkdc            | 0.0947066 | 0.204616  | 0             | 1         | 1         |
| Prkdc_j8         | 0.100071  | 0.100839  | 0             | 1         | 1         |
| Prkdc_j10        | 1.29514   | 2.30823   | 0             | 1         | 1         |



|                  |             |           |              |             |           |           |
|------------------|-------------|-----------|--------------|-------------|-----------|-----------|
| Pkp2_j2          | 0           | 0.202085  | 1.79769e+308 | 0.0010812   | 0.0152006 |           |
| Pkp2_j4          | 0.222572    | 0.60645   |              | 1.44612     | 0.0014086 | 0.0187846 |
| Aifm3_j3         | 0.754414    | 0.474226  |              | -0.669784   | 0.114645  | 0.421286  |
| Lztr1_j4         | 0.134279    | 1.66955   |              | 3.63616     | 1.33E-11  | 1.57E-09  |
| Scarf2_j1        | 0           | 0.0479432 | 1.79769e+308 |             | 0.140757  | 1         |
| Arvcf            | 0           | 0.0501813 |              | 0           | 1         | 1         |
| Arvcf_j3         | 0.376707    | 0.344853  |              | 0           | 1         | 1         |
| Gnb1l            | 0.000209894 | 0.396718  |              | 10.8842     | 0.663404  | 0.872571  |
| Wdvcf            | 0.279177    | 0.371233  |              | 0.411144    | 0.439434  | 0.748957  |
| XLOC_012499      | 0.0729681   | 0.12261   |              | 0.748741    | 0.453247  | 1         |
| B3gnt5           | 0           | 0.0921713 | 1.79769e+308 |             | 0.0073883 | 1         |
| B3gnt5_j5        | 0.183164    | 0.453462  |              | 1.30784     | 0.0037695 | 0.0411108 |
| Yeats2_j5        | 0.000320365 | 0.213528  |              | 0           | 1         | 1         |
| Vwa5b2_j3        | 7.24821     | 7.12621   |              | -0.0244905  | 0.836843  | 0.947789  |
| Ece2             | 7.24312     | 5.67591   |              | 0           | 1         | 1         |
| Psm2_j1          | 0.299263    | 0.27579   |              | -0.117846   | 0.755162  | 0.915526  |
| Eif4g1_j5        | 0.0520345   | 0.108346  |              | 0           | 1         | 1         |
| Vps8_j5          | 0.589153    | 0.587253  |              | -0.00466055 | 0.988107  | 0.996422  |
| Vps8_j6          | 0.206238    | 0.274269  |              | 0.411286    | 0.372807  | 0.705715  |
| Fetub            | 0.240003    | 0.255262  |              | 0.0889245   | 0.858299  | 0.954952  |
| St6gal1_j2       | 2.21109     | 3.12507   |              | 0           | 1         | 1         |
| Rtp4_j4          | 0.199924    | 0.54245   |              | 1.44004     | 0.0250284 | 0.164456  |
| XLOC_012529      | 0.134486    | 0.136638  |              | 0.0229037   | 0.975301  | 1         |
| XLOC_012529      | 0.194209    | 0.260636  |              | 0.424427    | 0.331596  | 0.673041  |
| XLOC_012532      | 0           | 0.120468  | 1.79769e+308 |             | 0.148319  | 1         |
| Ccdc50           | 0.0639925   | 0.307101  |              | 0           | 1         | 1         |
| Ccdc50_j2        | 1.22949     | 2.28643   |              | 0           | 1         | 1         |
| 4632428C04Rik_j2 | 0.120996    | 0.0756166 |              | 0           | 1         | 1         |
| Bdh1_j1          | 5.64201     | 6.64517   |              | 0.236096    | 0.0736282 | 0.327003  |
| Dlg1_j9          | 1.94071     | 2.32652   |              | 0.261592    | 0.256202  | 0.605042  |
| Ubxn7_j2         | 0.066755    | 0.566904  |              | 3.08615     | 1.34E-13  | 2.18E-11  |
| XLOC_012552      | 7.73042     | 9.25318   |              | 0.259401    | 0.273421  | 0.622536  |
| Snx4             | 1.84703     | 0.878062  |              | -1.07281    | 0.0007311 | 0.0111129 |
| Zfp148_j3        | 0.0605371   | 1.27594   |              | 0           | 1         | 1         |
| Heg1             | 1.80455     | 1.59256   |              | 0           | 1         | 1         |
| Ccdc14_j3        | 0           | 0.0505347 | 1.79769e+308 |             | 0.0504389 | 1         |
| Ccdc14_j2        | 0.0872209   | 0.0219785 |              | -1.98858    | 0.131004  | 1         |
| Ptplb_j1         | 1.79935     | 2.43921   |              | 0.43894     | 0.232395  | 0.579431  |
| Adcy5_j1         | 4.41103     | 4.48427   |              | 0           | 1         | 1         |
| Kpna1_j2         | 0           | 0.543595  |              | 0           | 1         | 1         |
| Gm5483           | 0.0696882   | 0.480991  |              | 2.78702     | 0.0554061 | 0.274965  |
| Gpr156_j4        | 0.204183    | 0.20465   |              | 0.00329007  | 0.995406  | 0.998726  |
| Popdc2_j1        | 0.23286     | 0.245781  |              | 0.0779147   | 0.877349  | 0.96086   |
| Tmem39a_j10      | 0.182137    | 0.514449  |              | 1.498       | 0.0276731 | 0.176203  |
| Tmem39a_j8       | 0           | 0.367046  | 1.79769e+308 |             | 2.87E-05  | 0.000744  |
| Tmem39a_j9       | 5.82E-05    | 0.145777  |              | 11.2898     | 0.919892  | 1         |
| XLOC_012597      | 0.0441052   | 0.187483  |              | 2.08774     | 0.344552  | 0.684226  |

|                  |            |           |              |           |           |
|------------------|------------|-----------|--------------|-----------|-----------|
| 2610015P09Rik_j5 | 0.164523   | 0.320997  | 0.964274     | 0.158563  | 0.492879  |
| Wdr52_j1         | 0.211888   | 0.230683  | 0.122612     | 0.804737  | 0.935382  |
| Cd200r1_j1       | 0.0843556  | 0.223871  | 1.40811      | 0.100236  | 0.391937  |
| Ccdc80_j2        | 0          | 0.627008  | 0            | 1         | 1         |
| Atg3_j2          | 22.3388    | 21.0047   | 0            | 1         | 1         |
| XLOC_012612      | 0.018887   | 0.156264  | 3.04853      | 0.256707  | 1         |
| Gm15640          | 0.101432   | 0.151029  | 0.574316     | 0.516746  | 1         |
| Ift57_j1         | 0.743001   | 1.60289   | 0            | 1         | 1         |
| Ift57_j2         | 4.40155    | 4.58139   | 0            | 1         | 1         |
| Rpl24_j3         | 0.684327   | 0.663587  | -0.0444011   | 0.907879  | 0.971006  |
| Zbtb11_j1        | 3.43124    | 2.94413   | 0            | 1         | 1         |
| Senp7            | 0.10616    | 0.423654  | 1.99664      | 0.0009087 | 0.0132574 |
| Abi3bp           | 0.430883   | 0.613259  | 0            | 1         | 1         |
| Abi3bp_j2        | 0.211736   | 0.269485  | 0            | 1         | 1         |
| Abi3bp_j1        | 0.459139   | 0.199312  | 0            | 1         | 1         |
| Abi3bp_j8        | 0.184491   | 0.313319  | 0            | 1         | 1         |
| Abi3bp_j7        | 0          | 0.0675492 | 0            | 1         | 1         |
| Tomm70a_j4       | 0.0207934  | 0.218056  | 0            | 1         | 1         |
| Dcblid2_j1       | 0.248542   | 0.260806  | 0            | 1         | 1         |
| Cldnd1           | 1.0956     | 1.56195   | 0            | 1         | 1         |
| Gm9017_j1        | 0.0855444  | 0.132747  | 0.633939     | 0.52712   | 1         |
| Pros1_j1         | 0.754912   | 1.94134   | 0            | 1         | 1         |
| Gbe1_j3          | 1.37607    | 1.56099   | 0            | 1         | 1         |
| Usp25_j3         | 0          | 0.0525591 | 1.79769e+308 | 0.104626  | 1         |
| 2810055G20Rik_j1 | 0.349626   | 0.213103  | -0.714263    | 0.475025  | 0.770913  |
| 2810055G20Rik_j3 | 0          | 0.338205  | 1.79769e+308 | 0.0240416 | 0.159942  |
| Cxadr_j2         | 0.0184554  | 0.0717318 | 1.95857      | 0.0661375 | 1         |
| Cxadr_j4         | 0          | 0.123867  | 1.79769e+308 | 0.0018653 | 1         |
| Cxadr_j5         | 0.164824   | 0.270567  | 0.71506      | 0.115755  | 0.423327  |
| Jam2_j2          | 1.05127    | 0.963917  | 0            | 1         | 1         |
| Usp16_j1         | 5.63389    | 5.49933   | 0            | 1         | 1         |
| Bach1_j1         | 0.778103   | 1.18622   | 0            | 1         | 1         |
| Bach1_j5         | 0.00936672 | 0.508948  | 0            | 1         | 1         |
| 4931408A02Rik_j7 | 0.056019   | 0.0232929 | -1.26602     | 0.463663  | 1         |
| 4931408A02Rik_j8 | 2.9997     | 2.69543   | -0.1543      | 0.673907  | 0.877026  |
| AK038602         | 0.604425   | 0.817873  | 0.436313     | 0.34822   | 0.686627  |
| AK038602_j2      | 0.0787804  | 0.114681  | 0.541718     | 0.641038  | 1         |
| AK038602_j3      | 0.168686   | 0.168383  | -0.00259437  | 0.997866  | 0.999228  |
| Ifnar1_j2        | 2.86872    | 2.90047   | 0.0158768    | 0.943572  | 0.98301   |
| Ifngr2_j1        | 0.562696   | 3.87132   | 2.7824       | 4.44E-16  | 1.02E-13  |
| Fam165b_j2       | 5.53796    | 3.89757   | -0.506778    | 0.196873  | 0.539714  |
| XLOC_012689      | 0.0334934  | 0.118014  | 1.81701      | 0.264371  | 1         |
| Cbr1_j3          | 15.0306    | 20.4942   | 0.447317     | 0.0011786 | 0.0163165 |
| Dopey2_j5        | 0.286095   | 0.271203  | -0.07712     | 0.834567  | 0.946855  |
| Morc3_j2         | 0.238804   | 0.286324  | 0            | 1         | 1         |
| Ttc3_j3          | 25.7999    | 19.4787   | 0            | 1         | 1         |
| Ttc3_j8          | 11.3885    | 11.2963   | 0            | 1         | 1         |

|                  |           |           |              |           |           |
|------------------|-----------|-----------|--------------|-----------|-----------|
| Mx2_j5           | 0.0114739 | 0.0892492 | 2.95948      | 0.119422  | 1         |
| Nlrc3_j7         | 0         | 0.144025  | 1.79769e+308 | 0.0079351 | 1         |
| Nlrc3_j8         | 0.0732739 | 0.126326  | 0.785785     | 0.579182  | 1         |
| Trap1_j3         | 2.2519    | 1.82828   | 0            | 1         | 1         |
| Tcfap4_j2        | 0         | 0.712479  | 1.79769e+308 | 7.34E-07  | 3.18E-05  |
| XLOC_012720      | 0.232627  | 0.158947  | -0.549472    | 0.272926  | 0.621826  |
| Coro7_j6         | 5.55825   | 6.5934    | 0            | 1         | 1         |
| Glyr1_j11        | 0.457156  | 4.00107   | 0            | 1         | 1         |
| Glyr1_j13        | 0.0880425 | 0.035543  | 0            | 1         | 1         |
| Glyr1_j14        | 0.780179  | 0.906279  | 0            | 1         | 1         |
| Tmem186_j1       | 3.05952   | 2.57564   | 0            | 1         | 1         |
| Parn_j5          | 2.52161   | 2.1401    | -0.236662    | 0.349649  | 0.687323  |
| 4921513D23Rik_j6 | 0.0931484 | 0.0921871 | 0            | 1         | 1         |
| Myh11            | 0.0402863 | 0.103311  | 1.35863      | 0.0393664 | 1         |
| Myh11            | 0.0745782 | 0.13937   | 0.902094     | 0.0811722 | 1         |
| Myh11_j2         | 0.0480394 | 0.0992648 | 1.04706      | 0.0996265 | 1         |
| Ube2v2_j4        | 0         | 1.05743   | 0            | 1         | 1         |
| Ube2v2_j1        | 0.272181  | 0.261021  | 0            | 1         | 1         |
| 2310008H04Rik_j1 | 0         | 0.116503  | 1.79769e+308 | 0.008867  | 1         |
| Dnm1_j3          | 0.840139  | 0.213457  | 0            | 1         | 1         |
| Fgd4_j7          | 0.141591  | 0.430324  | 1.6037       | 0.0019361 | 0.0243471 |
| Fgd4_j8          | 0.0408316 | 0.0928322 | 1.18494      | 0.226331  | 1         |
| Fgd4_j2          | 0         | 0.0861201 | 1.79769e+308 | 0.0010749 | 1         |
| Ppil2_j6         | 0         | 0.964662  | 1.79769e+308 | 8.81E-06  | 0.0002785 |
| Ppil2_j7         | 2.66284   | 2.94407   | 0.144845     | 0.559856  | 0.820916  |
| Ube2l3_j5        | 61.6096   | 59.093    | -0.0601675   | 0.492386  | 0.781013  |
| Slc7a4_j2        | 0.279168  | 0.481847  | 0            | 1         | 1         |
| Med15_j3         | 0.613917  | 0.392353  | 0            | 1         | 1         |
| Zdhhc8           | 18.4101   | 16.9253   | 0            | 1         | 1         |
| Comt_j2          | 14.6736   | 17.0247   | 0            | 1         | 1         |
| Comt             | 9.12559   | 12.9142   | 0            | 1         | 1         |
| Mrpl40_j4        | 11.4332   | 13.2723   | 0.215191     | 0.191049  | 0.533209  |
| A930003A15Rik_j1 | 0         | 0.0730762 | 1.79769e+308 | 0.137278  | 1         |
| Gm16618_j1       | 2.27572   | 2.76619   | 0            | 1         | 1         |
| Alg3_j1          | 0.146241  | 0.162907  | 0.155703     | 0.633841  | 0.85798   |
| Cln2_j2          | 0.83412   | 0.477148  | 0            | 1         | 1         |
| 2510009E07Rik_j2 | 0.105831  | 0.14903   | 0            | 1         | 1         |
| Liph_j3          | 0.07008   | 0.655531  | 3.22559      | 1.62E-05  | 0.0004663 |
| Liph_j1          | 0         | 0.338937  | 1.79769e+308 | 0.0002009 | 0.0038528 |
| Tra2b_j4         | 1.1772    | 0.947356  | -0.313377    | 0.258806  | 0.607552  |
| Tra2b_j5         | 1.08051   | 1.11673   | 0.0475654    | 0.844032  | 0.950714  |
| Etv5_j5          | 0.0809493 | 0.0694342 | 0            | 1         | 1         |
| Dgkg_j1          | 0         | 0.28559   | 0            | 1         | 1         |
| Tbccd1_j2        | 0.127701  | 0.153305  | 0.263632     | 0.741206  | 1         |
| Rfc4_j1          | 0.0621552 | 0.0858728 | 0            | 1         | 1         |
| Bcl6_j6          | 0.309003  | 0.449447  | 0            | 1         | 1         |
| Bcl6_j7          | 0.293252  | 1.18429   | 0            | 1         | 1         |

|                  |           |                        |            |           |           |
|------------------|-----------|------------------------|------------|-----------|-----------|
| Bcl6_j8          | 0.933404  | 0.414943               | 0          | 1         | 1         |
| Leprel1_j1       | 0         | 0.113194 1.79769e+308  | 0.004725   | 1         | 1         |
| Fgf12_j4         | 95.4661   | 67.7822                | 0          | 1         | 1         |
| Fgf12_j5         | 0.86717   | 1.02287                | 0          | 1         | 1         |
| Atp13a4          | 0         | 0.0822681 1.79769e+308 | 0.129786   | 1         | 1         |
| AK165338_j3      | 0.0839193 | 0.0737078              | -0.187186  | 0.868379  | 1         |
| AK165338_j4      | 0.18488   | 0.152586               | -0.276971  | 0.720115  | 0.899548  |
| Lrrc15           | 8.59E-06  | 0.523397               | 15.8942    | 0.97047   | 0.991645  |
| Atp13a3_j3       | 4.62698   | 5.12859                | 0          | 1         | 1         |
| Atp13a3_j4       | 0         | 0.261677               | 0          | 1         | 1         |
| Lsg1_j1          | 0.204162  | 1.17915                | 2.52996    | 2.67E-06  | 9.78E-05  |
| AI480653_j2      | 0         | 0.380381               | 0          | 1         | 1         |
| AI480653_j3      | 3.09554   | 3.15261                | 0          | 1         | 1         |
| Acap2_j2         | 1.09524   | 0.873226               | 0          | 1         | 1         |
| Ppp1r2_j1        | 51.2443   | 38.9092                | -0.397281  | 7.42E-06  | 0.0002391 |
| XLOC_012840      | 0.34844   | 0.353752               | 0.0218286  | 0.959439  | 0.988456  |
| XLOC_012840      | 0.604089  | 0.496715               | -0.282343  | 0.637072  | 0.859484  |
| Senp5_j4         | 6.76553   | 5.96012                | 0          | 1         | 1         |
| Senp5_j5         | 0.832071  | 0.958914               | 0          | 1         | 1         |
| Lrrc33_j3        | 0         | 0.209872 1.79769e+308  | 0.00257    | 0.030485  |           |
| mKIAA0226        | 8.90361   | 9.70241                | 0          | 1         | 1         |
| Kalrn_j7         | 0.528454  | 0.470606               | 0          | 1         | 1         |
| Sec22a_j2        | 0.0881731 | 0.378765               | 2.10289    | 0.0216649 | 0.148922  |
| Dtx3l_j1         | 1.56551   | 1.52523                | 0          | 1         | 1         |
| Stfa2_j1         | 0.156608  | 0.372326               | 1.24941    | 0.350956  | 0.688199  |
| Casr_j4          | 0.0541811 | 0.078237               | 0          | 1         | 1         |
| Slc15a2_j7       | 0.624848  | 0.39715                | -0.653821  | 1         | 1         |
| Traits_j1        | 0.114772  | 0.144014               | 0.327432   | 0.779189  | 1         |
| Fbxo40           | 0.459635  | 0.406572               | -0.176975  | 1         | 1         |
| Stxbp5l_j5       | 0.74392   | 0.912488               | 0          | 1         | 1         |
| 4932425I24Rik_j3 | 0         | 0.0624337 1.79769e+308 | 0.160957   | 1         | 1         |
| Pla1a_j2         | 0         | 0.0599846 1.79769e+308 | 0.136235   | 1         | 1         |
| Arhgap31_j1      | 3.76111   | 4.11292                | 0.129005   | 0.2987    | 0.645385  |
| Zdhhc23_j7       | 0.580979  | 0.378119               | 0          | 1         | 1         |
| Zdhhc23_j3       | 0         | 0.0773346              | 0          | 1         | 1         |
| Gramd1c_j5       | 0.197861  | 0.23546                | 0.250995   | 0.603751  | 0.843471  |
| XLOC_012894      | 0.300239  | 0.281746               | -0.0917152 | 0.875262  | 0.960277  |
| Slc35a5_j2       | 3.24823   | 3.73408                | 0          | 1         | 1         |
| Gm609_j2         | 0.919555  | 0.850564               | -0.112516  | 0.753097  | 0.914675  |
| Tmprss7_j5       | 0         | 0.262035 1.79769e+308  | 0.00065    | 0.0101108 |           |
| Tagln3_j6        | 5.64669   | 3.52894                | 0          | 1         | 1         |
| Plcx2_j4         | 3.6791    | 8.50335                | 0          | 1         | 1         |
| Bbx_j1           | 0         | 0.117063               | 0          | 1         | 1         |
| Bbx_j2           | 1.58817   | 1.57376                | 0          | 1         | 1         |
| Bbx_j3           | 0.354786  | 0.206024               | 0          | 1         | 1         |
| Bbx_j4           | 0.38255   | 0.481396               | 0          | 1         | 1         |
| 5330426P16Rik_j6 | 2.08423   | 3.4962                 | 0.746274   | 0.0029954 | 0.0343926 |

|               |             |           |              |           |           |
|---------------|-------------|-----------|--------------|-----------|-----------|
| AK157531_j2   | 0.0733012   | 0.0124602 | -2.55651     | 0.352333  | 1         |
| AK157531_j4   | 0.0250334   | 0.19197   | 2.93895      | 0.0979717 | 0.386822  |
| Alcam_j4      | 0           | 0.0555611 | 0            | 1         | 1         |
| St3gal6_j3    | 0.000552388 | 0.456853  | 0            | 1         | 1         |
| E330017A01Rik | 0.0581623   | 0.228132  | 1.97171      | 0.0317855 | 0.193053  |
| Epha6_j2      | 0           | 0.286945  | 1.79769e+308 | 3.64E-13  | 5.59E-11  |
| Zfp654_j5     | 0.000336092 | 0.667572  | 0            | 1         | 1         |
| Robo2_j13     | 4.18494     | 5.60731   | 0            | 1         | 1         |
| XLOC_012946   | 0           | 0.296393  | 1.79769e+308 | 0.0741399 | 0.328254  |
| XLOC_012946   | 0.80142     | 0.770863  | -0.0560837   | 0.933643  | 0.979831  |
| Nrip1_j4      | 0.594955    | 1.9192    | 0            | 1         | 1         |
| Nrip1_j6      | 0.0326111   | 2.19063   | 0            | 1         | 1         |
| AK087725_j1   | 0.0618336   | 0.273529  | 2.14523      | 0.062823  | 0.296839  |
| Btg3_j1       | 0.157855    | 0.231845  | 0.554561     | 0.354905  | 0.690914  |
| D16Ert472e    | 0           | 0.0470861 | 1.79769e+308 | 0.141436  | 1         |
| Mrpl39_j3     | 2.08683     | 1.54288   | -0.435691    | 0.0852659 | 0.356401  |
| Mrpl39_j5     | 8.37537     | 8.00543   | -0.0651752   | 0.761562  | 0.917949  |
| App_j5        | 0.115845    | 0.479345  | 0            | 1         | 1         |
| App_j6        | 26.4819     | 28.4845   | 0            | 1         | 1         |
| Adamts5_j3    | 0.465078    | 0.495993  | 0            | 1         | 1         |
| Ltn1_j2       | 0.482116    | 1.52084   | 0            | 1         | 1         |
| Rwdd2b_j1     | 0.134439    | 2.01565   | 0            | 1         | 1         |
| Grik1_j3      | 0.334279    | 0.366243  | 0            | 1         | 1         |
| Urb1_j6       | 1.23006     | 1.52254   | 0.307748     | 0.293407  | 0.640286  |
| Urb1_j7       | 0           | 0.170147  | 1.79769e+308 | 1.17E-05  | 0.0003552 |
| Synj1_j5      | 1.47461     | 1.49381   | 0            | 1         | 1         |
| Synj1_j6      | 2.19496     | 1.65988   | 0            | 1         | 1         |
| Synj1_j7      | 0.0432081   | 1.92094   | 0            | 1         | 1         |
| Synj1_j1      | 0.170186    | 0.157338  | 0            | 1         | 1         |
| Donson_j5     | 19.7193     | 21.295    | 0.110908     | 0.307334  | 0.652268  |
| Runx1_j2      | 2.14251     | 2.70346   | 0            | 1         | 1         |
| Setd4_j8      | 0.15637     | 0.39285   | 1.32901      | 0.0222273 | 0.15159   |
| Hlcs_j3       | 0           | 0.0502574 | 0            | 1         | 1         |
| Hlcs_j4       | 0.445898    | 0.705189  | 0            | 1         | 1         |
| Erg_j2        | 0           | 0.0811469 | 1.79769e+308 | 0.0524289 | 1         |
| Erg_j1        | 1.40E-05    | 0.0807783 | 12.4985      | 0.984267  | 1         |
| Brwd1_j3      | 0.541281    | 0.818806  | 0            | 1         | 1         |
| Hmgn1_j2      | 1.17486     | 1.29151   | 0            | 1         | 1         |
| Mx1_j3        | 0           | 0.0494381 | 1.79769e+308 | 0.108618  | 1         |
| Mx1_j4        | 0.108222    | 0.233901  | 1.11191      | 0.0395735 | 0.222296  |
| Prdm15_j3     | 0.143226    | 0.313948  | 0            | 1         | 1         |
| C2cd2         | 1.98739     | 2.62584   | 0            | 1         | 1         |
| Zfp295_j6     | 0.603974    | 0.703692  | 0            | 1         | 1         |
| Zfp295_j7     | 0.155896    | 0.181077  | 0            | 1         | 1         |
| Vasn_j1       | 1.26353     | 1.31219   | 0            | 1         | 1         |
| Mgrn1_j3      | 7.05456     | 6.03608   | -0.224945    | 0.0667672 | 0.308828  |
| Mgrn1_j6      | 2.0297      | 2.41603   | 0.251367     | 0.199121  | 0.542198  |

|                  |           |           |              |           |           |
|------------------|-----------|-----------|--------------|-----------|-----------|
| Sec14l5_j10      | 0.140562  | 0.254786  | 0.858073     | 0.0775494 | 0.337104  |
| Rbfox1_j8        | 11.5438   | 11.7014   | 0            | 1         | 1         |
| Rbfox1_j11       | 3.56681   | 3.36721   | 0            | 1         | 1         |
| Rbfox1_j15       | 14.7695   | 15.0008   | 0            | 1         | 1         |
| Nubp1_j1         | 7.05415   | 6.00141   | 0            | 1         | 1         |
| Ciita_j1         | 0.124619  | 0.162607  | 0.383859     | 0.471102  | 0.768695  |
| Ciita_j2         | 0.31245   | 0.424113  | 0.440822     | 0.0642812 | 0.301044  |
| Clec16a_j6       | 0.388166  | 0.504721  | 0            | 1         | 1         |
| 4930509G22Rik_j1 | 0.107382  | 0.171601  | 0.676303     | 0.459684  | 0.76155   |
| Abcc1_j2         | 0         | 0.22312   | 1.79769e+308 | 1.04E-08  | 7.25E-07  |
| Snai2_j4         | 0         | 0.103126  | 1.79769e+308 | 0.0432004 | 1         |
| Efcab1_j1        | 1.49423   | 1.86265   | 0.317956     | 0.143618  | 0.470722  |
| Prkdc_j6         | 0         | 0.201063  | 0            | 1         | 1         |
| Aifm3_j6         | 0.45436   | 0.0313104 | -3.85912     | 0.0085142 | 0.0759733 |
| Lztr1_j3         | 30.9522   | 36.2386   | 0.227488     | 0.017461  | 0.128141  |
| Scarf2_j2        | 0.15573   | 0.338357  | 1.1195       | 0.0234075 | 0.156895  |
| Gnb1l_j2         | 0.0338035 | 0.127889  | 1.91964      | 0.0439891 | 1         |
| Ufd1l            | 15.7768   | 16.685    | 0.0807527    | 0.557313  | 0.819571  |
| XLOC_012499      | 0.117812  | 0.219686  | 0.898956     | 0.389754  | 0.716855  |
| B3gnt5_j1        | 0.468605  | 0.251113  | -0.900037    | 0.0348872 | 0.205242  |
| B3gnt5_j3        | 0.150617  | 0.186119  | 0.30534      | 0.60395   | 0.843588  |
| XLOC_012501      | 0.105407  | 0.140447  | 0.414052     | 0.615235  | 1         |
| Yeats2_j1        | 0.0468074 | 0.0950407 | 0            | 1         | 1         |
| Yeats2_j3        | 0         | 0.115046  | 0            | 1         | 1         |
| Ap2m1_j1         | 0.54648   | 0.671592  | 0.297417     | 0.24377   | 0.591081  |
| Ap2m1_j3         | 0.0129301 | 0.099409  | 2.94264      | 0.0038742 | 1         |
| Ap2m1_j2         | 0.0385822 | 0.0599059 | 0.63476      | 0.421529  | 1         |
| Vwa5b2_j2        | 1.27346   | 1.25168   | -0.0248815   | 0.90069   | 0.968396  |
| Vwa5b2_j4        | 1.6036    | 1.59557   | -0.00723953  | 0.975098  | 0.992833  |
| Ece2_j3          | 7.48007   | 7.58098   | 0            | 1         | 1         |
| Ece2_j2          | 0         | 1.01133   | 0            | 1         | 1         |
| XLOC_012509      | 0.0541839 | 0.178279  | 1.7182       | 0.275668  | 0.624585  |
| Eif4g1_j6        | 0.403465  | 1.04913   | 0            | 1         | 1         |
| Chrd_j5          | 0.0566384 | 0.107467  | 0.924043     | 0.614566  | 1         |
| Ephb3_j3         | 1.47058   | 1.59508   | 0.117241     | 0.645522  | 0.863359  |
| St6gal1_j1       | 4.13007   | 2.63684   | 0            | 1         | 1         |
| St6gal1_j3       | 4.01174   | 3.74133   | 0            | 1         | 1         |
| AK144897_j1      | 0.18335   | 0.24563   | 0.421886     | 0.535638  | 0.80631   |
| AK144897_j11     | 0.0617224 | 0.0701258 | 0.18415      | 0.918009  | 1         |
| Rtp4             | 3.7119    | 3.67706   | -0.0136063   | 0.951024  | 0.985865  |
| XLOC_012529      | 0         | 0.051447  | 1.79769e+308 | 0.192988  | 1         |
| XLOC_012529      | 0.0541461 | 0.252078  | 2.21894      | 0.0347455 | 0.204729  |
| XLOC_012529      | 0.160461  | 0.344339  | 1.10161      | 0.025267  | 0.165533  |
| Lpp_j4           | 0         | 0.102571  | 1.79769e+308 | 0.0682251 | 1         |
| Lpp_j8           | 0.0715218 | 0.0963614 | 0.430072     | 0.80972   | 1         |
| Il1rap_j3        | 0.065885  | 0.101856  | 0.628513     | 0.582303  | 1         |
| Hes1_j1          | 1.34559   | 1.17938   | -0.190213    | 0.675416  | 0.877616  |

|                  |             |                        |           |           |           |
|------------------|-------------|------------------------|-----------|-----------|-----------|
| XLOC_012541      | 0.269595    | 0.120238               | -1.1649   | 0.246378  | 0.594086  |
| Dlg1_j11         | 0.123179    | 0.329549               | 1.41974   | 0.0514349 | 0.262915  |
| Pcyt1a_j2        | 0           | 0.376534               | 0         | 1         | 1         |
| Tnk2_j5          | 0.000789673 | 3.35407                | 0         | 1         | 1         |
| Rpl35a_j4        | 0.934721    | 0.9085                 | -0.041049 | 0.888414  | 0.964658  |
| Osbpl11_j1       | 0.0107116   | 0.460054               | 5.42456   | 0.0041527 | 0.0440867 |
| Snx4_j7          | 0.0489153   | 0 -1.79769e+308        |           | 1         | 1         |
| Ccdc14_j1        | 0           | 0.0815627 1.79769e+308 |           | 0.0118709 | 1         |
| Mylk_j1          | 0.120857    | 0.274224               | 1.18205   | 0.0190544 | 0.13627   |
| Mylk_j3          | 0           | 0.0750604 1.79769e+308 |           | 0.0154568 | 1         |
| Mylk_j6          | 0           | 0.0481324 1.79769e+308 |           | 0.0928411 | 1         |
| Ptplb_j5         | 2.00076     | 2.70798                | 0.436669  | 0.0154354 | 0.117303  |
| Adcy5_j3         | 5.69806     | 6.70656                | 0         | 1         | 1         |
| XLOC_012578      | 0.0744494   | 0.165868               | 1.1557    | 0.264192  | 0.613127  |
| Iqcb1_j5         | 0           | 0.126434               | 0         | 1         | 1         |
| Golgb1_j5        | 0.00420765  | 0.25121                | 0         | 1         | 1         |
| Golgb1           | 0.866322    | 0.91995                | 0         | 1         | 1         |
| Polq_j1          | 0.0341615   | 0.104313               | 1.61048   | 0.226778  | 1         |
| Tmem39a_j3       | 0           | 0.146359 1.79769e+308  |           | 0.004986  | 1         |
| Zbtb20_j2        | 0.214806    | 0.654238               | 1.60678   | 0         | 0         |
| 2610015P09Rik_j4 | 0           | 0.0557045 1.79769e+308 |           | 0.112636  | 1         |
| 2610015P09Rik_j6 | 0.216603    | 0.855122               | 1.98108   | 0.0024673 | 0.0295306 |
| XLOC_012612      | 0.130356    | 0.150832               | 0.210493  | 0.696849  | 1         |
| Btla_j1          | 0.136638    | 0.198423               | 0.538225  | 0.447816  | 0.754552  |
| C330027C09Rik    | 0.699199    | 0.471534               | -0.56834  | 0.0575754 | 0.281206  |
| Cblb_j4          | 1.96964     | 1.53166                | 0         | 1         | 1         |
| Rpl24_j2         | 0.341295    | 0.353119               | 0.0491332 | 0.92689   | 0.977384  |
| Rpl24_j7         | 0.0768055   | 0.0919803              | 0.260116  | 0.825993  | 1         |
| Senp7_j4         | 0           | 0.122077 1.79769e+308  |           | 0.0032411 | 1         |
| Abi3bp_j3        | 0.0602598   | 0.27512                | 0         | 1         | 1         |
| Tomm70a_j1       | 16.8073     | 14.1762                | 0         | 1         | 1         |
| Tomm70a_j2       | 0.193119    | 0.151366               | 0         | 1         | 1         |
| Gbe1_j2          | 0.628909    | 0.861883               | 0         | 1         | 1         |
| Robo1_j3         | 0           | 0.0686594 1.79769e+308 |           | 0.0064592 | 1         |
| 2810055G20Rik    | 0.50465     | 0.533382               | 0.0798875 | 0.851058  | 0.95267   |
| Bach1_j4         | 1.98371     | 3.77053                | 0         | 1         | 1         |
| AK090163_j4      | 0.0541372   | 0.109782               | 1.01995   | 0.274419  | 1         |
| 4931408A02Rik_j9 | 0.321714    | 0.15266                | -1.07545  | 0.320492  | 0.663744  |
| Ifnar2_j1        | 1.89933     | 2.02647                | 0         | 1         | 1         |
| AK038602_j1      | 0.0899065   | 0.191967               | 1.09436   | 0.307226  | 0.652224  |
| AK038602_j4      | 0.0619935   | 0.146969               | 1.24532   | 0.357515  | 1         |
| Ifnar1_j5        | 0.118871    | 0.0327254              | -1.86092  | 0.192642  | 1         |
| Itsn1_j1         | 0.322547    | 0.247583               | -0.381596 | 0.166888  | 0.503257  |
| XLOC_012688      | 0           | 0.0515368              | 0         | 1         | 1         |
| Cbr1_j2          | 0.277061    | 0 -1.79769e+308        |           | 0.0036955 | 0.0405851 |
| Dopey2_j4        | 0.992126    | 0.867039               | -0.194427 | 0.403967  | 0.72656   |
| Chaf1b_j5        | 0.0660165   | 0.297956               | 2.1742    | 0.0869113 | 0.360373  |

|                  |            |           |              |           |           |
|------------------|------------|-----------|--------------|-----------|-----------|
| Ttc3_j9          | 73.1835    | 67.8775   | 0            | 1         | 1         |
| Sh3bgr_j1        | 2.27726    | 1.94408   | -0.228211    | 0.516659  | 0.795178  |
| Igsf5_j1         | 118.626    | 77.8436   | 0            | 1         | 1         |
| 1700037C18Rik_j1 | 1.11603    | 0.568124  | -0.974095    | 0.0934528 | 0.376477  |
| Nlrc3_j4         | 0.0593474  | 0.0932287 | 0.65159      | 0.381252  | 1         |
| Slx4_j2          | 0.621364   | 0.631315  | 0.0229224    | 0.961305  | 0.989009  |
| Trap1_j2         | 2.11781    | 2.39107   | 0            | 1         | 1         |
| Crebbp_j5        | 0          | 0.0799129 | 1.79769e+308 | 0.0006412 | 1         |
| Fam100a_j2       | 5.12256    | 9.43957   | 0.881857     | 2.06E-05  | 0.0005672 |
| Glyr1_j3         | 0.387712   | 0.48142   | 0            | 1         | 1         |
| Carhsp1_j2       | 25.5807    | 38.1818   | 0            | 1         | 1         |
| Emp2_j1          | 0.90723    | 2.82576   | 1.6391       | 3.53E-12  | 4.61E-10  |
| Txndc11_j1       | 0.937943   | 0.966014  | 0.0425432    | 0.8595    | 0.955525  |
| Parn_j6          | 0.00112624 | 0.914314  | 9.66503      | 0.216642  | 0.562756  |
| Dnm1l_j2         | 3.66505    | 4.66818   | 0            | 1         | 1         |
| Ube2l3_j2        | 0.298143   | 0.162046  | -0.879602    | 0.162467  | 0.497968  |
| Ube2l3_j4        | 0          | 0.437722  | 1.79769e+308 | 0.0047228 | 0.0485971 |
| Pi4ka_j6         | 6.7334     | 7.96208   | 0.241812     | 0.0888236 | 0.365257  |
| Med15_j2         | 0.927593   | 0.813903  | 0            | 1         | 1         |
| Dgcr2_j1         | 1.33998    | 1.71025   | 0            | 1         | 1         |
| Slc25a1_j3       | 2.97053    | 15.0539   | 0            | 1         | 1         |
| Zdhhc8_j1        | 1.40301    | 0.702251  | 0            | 1         | 1         |
| Zdhhc8_j8        | 0.469629   | 0.479824  | 0            | 1         | 1         |
| Zdhhc8_j7        | 1.16647    | 1.19054   | 0            | 1         | 1         |
| Ranbp1_j1        | 2.7854     | 3.98891   | 0.518107     | 0.0595493 | 0.287106  |
| Dgcr8_j1         | 0.134216   | 0.107747  | -0.316902    | 0.461909  | 1         |
| Comt_j3          | 17.8894    | 15.4933   | 0            | 1         | 1         |
| Sept5_j2         | 2.35402    | 5.33741   | 0            | 1         | 1         |
| Cdc45_j1         | 0          | 0.173335  | 1.79769e+308 | 0.0866772 | 0.359862  |
| Cdc45_j2         | 1.04228    | 0.697917  | -0.578612    | 0.0667134 | 0.308608  |
| Cdc45            | 0.0506833  | 0.0689525 | 0.444091     | 0.732633  | 1         |
| Mrpl40_j1        | 5.38816    | 5.92804   | 0.137763     | 0.43064   | 0.743283  |
| Mrpl40_j2        | 0          | 0.103674  | 1.79769e+308 | 0.116798  | 1         |
| Klhl6_j1         | 0.516723   | 0.641727  | 0.31257      | 0.515065  | 0.793917  |
| Abcc5_j3         | 0.308901   | 0.0771356 | 0            | 1         | 1         |
| Alg3_j3          | 6.02778    | 5.95603   | -0.0172756   | 0.92174   | 0.975486  |
| Cln2_j7          | 0.234408   | 0.315497  | 0            | 1         | 1         |
| Ehhadh_j1        | 0.0837646  | 0.111046  | 0.406746     | 0.649715  | 1         |
| Liph_j2          | 0          | 0.0827177 | 1.79769e+308 | 0.0525328 | 1         |
| Igf2bp2_j1       | 0.105913   | 0.254968  | 1.26743      | 0.0543633 | 0.271922  |
| Etv5_j9          | 7.52093    | 8.4722    | 0            | 1         | 1         |
| Dgkg_j3          | 0          | 0.0531565 | 0            | 1         | 1         |
| Rfc4_j2          | 0.796042   | 0.700013  | 0            | 1         | 1         |
| 1600021P15Rik_j1 | 0.438012   | 0.86174   | 0.976282     | 0.0082446 | 0.0742883 |
| Atp13a4_j2       | 0          | 0.115215  | 1.79769e+308 | 0.0661516 | 1         |
| Atp13a4_j3       | 0.0628181  | 0.0826853 | 0.396451     | 0.824614  | 1         |
| AK165338_j6      | 0.106217   | 0.515677  | 2.27945      | 0.0617028 | 0.293596  |



|                  |             |                        |            |           |           |
|------------------|-------------|------------------------|------------|-----------|-----------|
| AK165338_j7      | 0.414927    | 0.653345               | 0.654988   | 0.515894  | 0.794623  |
| AK165338_j10     | 0           | 0.143789 1.79769e+308  |            | 0.0106744 | 1         |
| XLOC_012832      | 0.0565707   | 0.0871283              | 0.623087   | 0.680817  | 1         |
| Tmem44_j6        | 0.186909    | 0.242113               | 0.373344   | 0.35379   | 0.690055  |
| Ppp1r2_j3        | 2.951       | 0.974501               | -1.59847   | 2.09E-06  | 7.88E-05  |
| Senp5_j3         | 9.31664     | 9.44356                | 0          | 1         | 1         |
| Pigx             | 2.5405      | 2.77062                | 0.1251     | 0.500582  | 0.785042  |
| Lrrc33_j2        | 0.0444564   | 0.238444               | 2.42319    | 0.0119615 | 0.0979788 |
| 1700021K19Rik_j1 | 0.389588    | 0.270383               | 0          | 1         | 1         |
| Kalrn            | 2.36024     | 2.09036                | 0          | 1         | 1         |
| Dirc2_j3         | 23.3964     | 27.0704                | 0.210434   | 0.0698186 | 0.317102  |
| Casr_j1          | 0.245622    | 0.29451                | 0          | 1         | 1         |
| Slc15a2_j5       | 0.116805    | 0.147785               | 0.339395   | 0.669775  | 1         |
| Pla1a_j3         | 0           | 0.109127 1.79769e+308  |            | 0.0445747 | 1         |
| Ktelc1_j2        | 2.48461     | 2.91853                | 0          | 1         | 1         |
| Gap43_j3         | 88.0992     | 120.054                | 0.446484   | 2.88E-05  | 0.0007469 |
| Gap43_j5         | 0           | 0.915809 1.79769e+308  |            | 0.0001775 | 0.003477  |
| Qtrtd1_j1        | 0.07898     | 0.0900144              | 0          | 1         | 1         |
| Gramd1c          | 0.0760874   | 0.0972901              | 0.354636   | 0.655047  | 1         |
| Slc35a5_j1       | 17.5653     | 14.5799                | 0          | 1         | 1         |
| Cd200_j1         | 27.1919     | 34.0214                | 0.323265   | 0.0007513 | 0.0113916 |
| Tmprss7_j6       | 0.06861     | 0.297559               | 2.11669    | 0.167063  | 0.503357  |
| Tmprss7_j7       | 0.246664    | 0.169061               | -0.545005  | 0.396031  | 0.720998  |
| Phldb2_j3        | 0           | 0.305482               | 0          | 1         | 1         |
| Plcx2_j3         | 1.3153      | 2.79687                | 0          | 1         | 1         |
| Pvrl3_j3         | 0           | 0.843425               | 0          | 1         | 1         |
| Pvrl3_j2         | 5.59058     | 3.73105                | 0          | 1         | 1         |
| XLOC_012906      | 0.078618    | 0.162159               | 1.04448    | 0.260176  | 0.608919  |
| Dzip3_j4         | 4.73496     | 4.06169                | -0.221271  | 0.113204  | 0.418792  |
| Bbx_j9           | 0           | 0.0913115              | 0          | 1         | 1         |
| Bbx_j10          | 0.384045    | 0.0795109              | 0          | 1         | 1         |
| Bbx_j12          | 0.00135008  | 0.0918594              | 0          | 1         | 1         |
| 5330426P16Rik_j2 | 0.101611    | 0.424514               | 2.06276    | 0.001151  | 0.0159976 |
| Alcam_j6         | 0.0257639   | 0.122265               | 0          | 1         | 1         |
| Nfkbiz_j2        | 0           | 0.0919712 1.79769e+308 |            | 0.0130049 | 1         |
| Tfg_j3           | 3.88067     | 4.4315                 | 0          | 1         | 1         |
| Crybg3_j1        | 0.300742    | 0.327114               | 0.121265   | 0.644527  | 0.862952  |
| Epha6_j5         | 0.382566    | 0.442425               | 0.209722   | 0.63637   | 0.859038  |
| Htr1f            | 1.28487     | 1.53995                | 0.261255   | 0.200768  | 0.544177  |
| Chmp2b_j1        | 31.3686     | 30.2206                | -0.0537868 | 0.592818  | 0.8379    |
| AK087725_j6      | 0.0509322   | 0 -1.79769e+308        |            | 0.0398729 | 1         |
| AK087725_j8      | 0.000743907 | 0.147778               | 7.63409    | 0.844761  | 1         |
| D16Ertd472e_j2   | 0           | 0.15672 1.79769e+308   |            | 0.0232259 | 1         |
| Mrpl39_j8        | 0.100226    | 0.163907               | 0.709622   | 0.627231  | 0.854539  |
| App_j7           | 90.7561     | 99.8568                | 0          | 1         | 1         |
| Cyyr1_j1         | 0           | 0.0678828 1.79769e+308 |            | 0.123779  | 1         |
| Adamts1_j1       | 1.31978     | 2.61023                | 0          | 1         | 1         |

|                  |             |           |              |           |           |
|------------------|-------------|-----------|--------------|-----------|-----------|
| Adamts5_j1       | 1.69318     | 1.38235   | 0            | 1         | 1         |
| Ltn1_j3          | 0.0493274   | 0.034576  | 0            | 1         | 1         |
| Grik1            | 2.37485     | 2.40221   | 0            | 1         | 1         |
| Tiam1_j3         | 0.0261458   | 0.0481014 | 0.8795       | 0.618018  | 1         |
| Scaf4_j2         | 0.211836    | 0.601859  | 1.50647      | 1.47E-10  | 1.44E-08  |
| Synj1_j9         | 1.0422      | 1.71461   | 0            | 1         | 1         |
| Synj1_j12        | 0.85786     | 0.435055  | 0            | 1         | 1         |
| Synj1_j11        | 2.3643      | 3.09844   | 0            | 1         | 1         |
| Donson_j3        | 0.202963    | 0.262442  | 0.370781     | 0.513894  | 0.793006  |
| Atp5o_j2         | 36.1187     | 32.9964   | -0.130434    | 0.398006  | 0.722245  |
| Atp5o_j3         | 15.3577     | 16.7749   | 0.12734      | 0.622428  | 0.852322  |
| Runx1_j5         | 0           | 0.457176  | 0            | 1         | 1         |
| Setd4_j5         | 0.774909    | 1.938     | 1.32247      | 0.0110278 | 0.0921261 |
| Setd4_j12        | 0.422337    | 0.658317  | 0.64039      | 0.293893  | 0.640708  |
| Hlcs_j6          | 0.000907079 | 1.22072   | 0            | 1         | 1         |
| Erg              | 0.0569326   | 0.147636  | 1.37472      | 0.235576  | 1         |
| Mx1_j2           | 0.12201     | 0.0982718 | -0.312146    | 0.779775  | 1         |
| C2cd2_j8         | 0.512365    | 0.854827  | 0            | 1         | 1         |
| Zfp295_j9        | 0           | 0.145613  | 0            | 1         | 1         |
| Zfp295_j1        | 7.99E-05    | 0.583186  | 0            | 1         | 1         |
| Zfp174_j2        | 0.367674    | 0.425091  | 0.209343     | 0.46931   | 0.767468  |
| Cluap1_j1        | 0.3482      | 0.461947  | 0.407813     | 0.299623  | 0.646333  |
| AK154225_j3      | 0.195559    | 0.159921  | -0.290245    | 0.619986  | 0.850928  |
| AK154225_j6      | 0           | 0.126926  | 1.79769e+308 | 0.012751  | 1         |
| Sec14l5_j3       | 0.0679405   | 0.0701044 | 0.0452323    | 0.951117  | 1         |
| Sec14l5_j9       | 0.029105    | 0.179972  | 2.62843      | 0.0027017 | 0.0317766 |
| BC024814_j1      | 2.42178     | 3.82686   | 0            | 1         | 1         |
| Abat_j1          | 0.938889    | 0.551621  | -0.767277    | 0.0150275 | 0.115102  |
| XLOC_012443      | 0.0492559   | 0.156386  | 1.66674      | 0.155243  | 1         |
| Clec16a          | 0.849325    | 1.10407   | 0            | 1         | 1         |
| Snx29_j6         | 0.935969    | 1.02298   | 0.128249     | 0.644356  | 0.862839  |
| Snx29_j7         | 1.13515     | 0.900158  | -0.334631    | 0.183404  | 0.524055  |
| XLOC_012459      | 0.0544321   | 0.109335  | 1.00622      | 0.427997  | 1         |
| 2900011008Rik_j1 | 18.9685     | 18.5521   | -0.0320224   | 0.840977  | 0.949797  |
| Prkdc_j5         | 0.0429962   | 0.0668557 | 0            | 1         | 1         |
| Prkdc_j7         | 0.0648955   | 0.206415  | 0            | 1         | 1         |
| Ppm1f_j1         | 0.28973     | 0.0806215 | -1.84547     | 0.154134  | 0.487096  |
| Aifm3_j5         | 0.211079    | 0.284097  | 0.428605     | 0.492868  | 0.781353  |
| Smpd4_j3         | 0.217939    | 0.387398  | 0            | 1         | 1         |
| Klhl22_j5        | 4.26582     | 4.73529   | 0            | 1         | 1         |
| Arvcf            | 2.8578      | 3.06703   | 0            | 1         | 1         |
| Txnrd2_j1        | 4.76252     | 4.77618   | 0            | 1         | 1         |
| Gnb1l            | 0.33903     | 0.0827473 | -2.03463     | 0.0055441 | 0.0548987 |
| Hira_j2          | 4.06623     | 4.85639   | 0.256192     | 0.0655427 | 0.305163  |
| Yeats2_j7        | 0.336492    | 0.871861  | 0            | 1         | 1         |
| Eif2b5_j3        | 0.514901    | 4.02659   | 0            | 1         | 1         |
| Dvl3_j3          | 1.40085     | 0.640718  | -1.12854     | 0.0002181 | 0.0041152 |

|                  |           |           |              |           |           |
|------------------|-----------|-----------|--------------|-----------|-----------|
| Dvl3_j4          | 2.36096   | 1.91306   | -0.30349     | 0.180511  | 0.520279  |
| Abcf3_j2         | 5.05818   | 3.4473    | -0.553149    | 0.009307  | 0.0812759 |
| Psm2_j5          | 0.2383    | 0.133146  | -0.839774    | 0.377076  | 0.708952  |
| Eif4g1_j3        | 0.0576319 | 0.0988819 | 0            | 1         | 1         |
| Chrd_j2          | 0         | 0.0535322 | 1.79769e+308 | 0.102206  | 1         |
| Chrd_j6          | 0.259923  | 0.272795  | 0.0697326    | 0.933398  | 0.979805  |
| AK144897_j7      | 0.398947  | 0.605104  | 0.600987     | 0.264473  | 0.613354  |
| AK144897_j6      | 0.254529  | 0.236474  | -0.106151    | 0.892006  | 0.965709  |
| AK144897_j10     | 0.364153  | 0.458202  | 0.331439     | 0.7495    | 0.913025  |
| AK144897_j12     | 0         | 0.241     | 1.79769e+308 | 0.0905322 | 0.3696    |
| Rtp4_j1          | 0         | 0.305712  | 1.79769e+308 | 0.003168  | 0.0360095 |
| Lpp_j5           | 0.0835461 | 0.185985  | 1.15454      | 0.280222  | 0.629039  |
| XLOC_012531      | 0.0499982 | 0.162097  | 1.69691      | 0.146741  | 0.475087  |
| Tprg_j3          | 0.0128142 | 0.118022  | 3.20323      | 0.507188  | 1         |
| Il1rap           | 0.190986  | 0.169646  | -0.170941    | 0.765367  | 0.919757  |
| Ccdc50_j1        | 0.0363978 | 0.136087  | 0            | 1         | 1         |
| Opa1_j2          | 1.6185    | 1.32563   | 0            | 1         | 1         |
| 4632428C04Rik    | 0.465215  | 0.767018  | 0            | 1         | 1         |
| Bdh1_j2          | 5.41325   | 6.08526   | 0.168823     | 0.462613  | 0.763368  |
| Dlg1_j3          | 0.472799  | 0.571854  | 0.274418     | 0.394266  | 0.719811  |
| Dlg1_j8          | 0         | 0.0629486 | 1.79769e+308 | 0.034035  | 1         |
| Tnk2             | 9.82187   | 6.99691   | 0            | 1         | 1         |
| Tnk2_j6          | 2.62785   | 2.49917   | 0            | 1         | 1         |
| Tnk2_j9          | 0.269169  | 0.298432  | 0            | 1         | 1         |
| Rpl35a           | 0.159275  | 0.139379  | -0.192508    | 0.881949  | 0.962591  |
| Rpl35a           | 5.20912   | 6.68051   | 0.358918     | 0.186871  | 0.527882  |
| Rpl35a           | 2.54369   | 2.87715   | 0.177714     | 0.646211  | 0.863593  |
| Zfp148_j2        | 0.279825  | 0.153352  | 0            | 1         | 1         |
| Itgb5_j3         | 0.428524  | 0.880725  | 1.03931      | 0.0419229 | 0.231145  |
| Ccdc14_j4        | 0.0588602 | 0.0838008 | 0.509672     | 0.577812  | 1         |
| Ccdc14_j5        | 0.0170141 | 0.0567883 | 1.73887      | 0.273512  | 1         |
| Mylk_j7          | 0.214105  | 0.691983  | 1.69242      | 0.0010833 | 0.0152132 |
| Adcy5_j2         | 0.623659  | 1.85322   | 0            | 1         | 1         |
| Sema5b_j1        | 0.32609   | 0.0915425 | -1.83276     | 0.0019807 | 0.0248113 |
| Golgb1_j3        | 0.182859  | 0.289228  | 0            | 1         | 1         |
| Golgb1_j6        | 3.24915   | 3.12391   | 0            | 1         | 1         |
| Gsk3b_j3         | 0         | 0.274347  | 0            | 1         | 1         |
| Cd80_j1          | 0.0932241 | 0.125268  | 0.426237     | 0.6492    | 1         |
| Tmem39a_j4       | 0.493628  | 0.510971  | 0.0498179    | 0.927522  | 0.977629  |
| XLOC_012597      | 0.139324  | 0.0769331 | -0.856764    | 0.600313  | 0.841633  |
| Zbtb20_j1        | 0.0757811 | 0.135099  | 0.834109     | 0.437801  | 1         |
| 2610015P09Rik_j3 | 0         | 0.0946428 | 1.79769e+308 | 0.0159445 | 1         |
| BC027231_j1      | 1.02889   | 1.2337    | 0.2619       | 0.226444  | 0.573564  |
| Ccdc80_j3        | 1.3874    | 1.26194   | 0            | 1         | 1         |
| XLOC_012612      | 0.0744954 | 0.0861994 | 0.210527     | 0.877272  | 1         |
| Gm5406           | 4.33094   | 3.91411   | -0.145996    | 0.490734  | 0.780087  |
| Morc1_j3         | 0         | 0.0720566 | 1.79769e+308 | 0.0920838 | 1         |

|                  |           |           |              |           |           |
|------------------|-----------|-----------|--------------|-----------|-----------|
| Cd47_j5          | 1.77497   | 5.64572   | 0            | 1         | 1         |
| Abi3bp_j6        | 0         | 0.097626  | 0            | 1         | 1         |
| Filip1l          | 0.629344  | 0.910833  | 0.533336     | 0.0129923 | 0.104077  |
| Cldnd1_j1        | 5.03353   | 4.97782   | 0            | 1         | 1         |
| Pros1_j2         | 0.769137  | 0.70958   | 0            | 1         | 1         |
| Robo1_j4         | 0.408194  | 0.170571  | -1.25889     | 0.0022064 | 0.0269668 |
| 2810055G20Rik    | 0.172036  | 0.199726  | 0.215314     | 0.803969  | 0.935008  |
| 2810055G20Rik_j2 | 0.379142  | 0.260687  | -0.540416    | 0.478793  | 0.773322  |
| Chodl_j2         | 0.0460373 | 0.0554443 | 0.268235     | 0.856197  | 1         |
| Bach1_j3         | 0         | 0.380737  | 0            | 1         | 1         |
| AK090163_j3      | 0.0841184 | 0.31698   | 1.9139       | 0.028777  | 0.180589  |
| 4931408A02Rik_j3 | 0.368312  | 0.283176  | -0.379231    | 0.487649  | 0.77841   |
| Dopey2_j9        | 0.061591  | 0.118165  | 0.940015     | 0.489915  | 1         |
| Morc3_j1         | 0.0674878 | 0.11976   | 0            | 1         | 1         |
| Chaf1b_j4        | 0         | 0.330058  | 1.79769e+308 | 0.0040928 | 0.0436312 |
| Ttc3_j6          | 3.23569   | 4.09154   | 0            | 1         | 1         |
| Bace2_j3         | 3.80351   | 4.1938    | 0.140924     | 0.433026  | 0.744598  |
| Mx2_j1           | 0         | 0.174025  | 1.79769e+308 | 0.0034713 | 0.0386896 |
| Slx4_j1          | 0.0295811 | 0.0834581 | 1.49638      | 0.114849  | 1         |
| Slx4_j12         | 0.196687  | 0.21959   | 0.158912     | 0.827255  | 0.944343  |
| Crebbp_j2        | 0.977022  | 0.22611   | -2.11137     | 7.67E-09  | 5.43E-07  |
| Adcy9_j1         | 0.331714  | 0.44987   | 0            | 1         | 1         |
| Coro7_j1         | 0.514215  | 0.580649  | 0            | 1         | 1         |
| Coro7_j3         | 0.149389  | 0.479393  | 0            | 1         | 1         |
| Coro7_j5         | 2.06784   | 3.05513   | 0            | 1         | 1         |
| Fam100a_j3       | 4.9336    | 6.1404    | 0.315691     | 0.17302   | 0.510725  |
| Glyr1_j10        | 0         | 0.150208  | 0            | 1         | 1         |
| Glyr1_j12        | 6.61185   | 4.4128    | 0            | 1         | 1         |
| Glyr1            | 0.123221  | 0.345294  | 0            | 1         | 1         |
| Litaf_j1         | 1.96199   | 2.01945   | 0.0416406    | 0.875805  | 0.960577  |
| Parn_j1          | 0         | 0.111022  | 1.79769e+308 | 0.0698634 | 1         |
| 4921513D23Rik_j4 | 0         | 0.068775  | 0            | 1         | 1         |
| 0610037P05Rik_j2 | 7.66865   | 7.59185   | 0            | 1         | 1         |
| Dnm1l_j1         | 46.5393   | 45.0376   | 0            | 1         | 1         |
| Ppil2_j2         | 4.70848   | 5.60831   | 0.252304     | 0.0487892 | 0.25449   |
| Ppil2_j5         | 6.30803   | 4.89856   | -0.364832    | 0.05338   | 0.268937  |
| Ppil2_j4         | 7.59985   | 9.24815   | 0.283193     | 0.0750888 | 0.330832  |
| Ube2l3_j7        | 5.93738   | 6.46554   | 0.122944     | 0.55364   | 0.817251  |
| Thap7            | 8.03003   | 8.93773   | 0.154502     | 0.161194  | 0.496146  |
| Slc7a4_j4        | 0.672071  | 0.72959   | 0            | 1         | 1         |
| Med15_j6         | 3.60387   | 2.90625   | 0            | 1         | 1         |
| Med15_j7         | 5.66645   | 6.59328   | 0            | 1         | 1         |
| Med15_j8         | 0.185741  | 0.039086  | 0            | 1         | 1         |
| Dgcr2_j2         | 0.0749947 | 0.331329  | 0            | 1         | 1         |
| Slc25a1_j1       | 13.2403   | 9.05779   | 0            | 1         | 1         |
| 4933432I09Rik_j4 | 0.0323105 | 0.0837588 | 0            | 1         | 1         |
| Ranbp1_j3        | 0.546778  | 0.401153  | -0.446804    | 0.52736   | 0.801527  |

|                  |            |           |               |           |          |
|------------------|------------|-----------|---------------|-----------|----------|
| Map6d1_j1        | 0.460765   | 0.616064  | 0.419048      | 0.21974   | 0.566404 |
| Abcc5_j1         | 21.7451    | 18.0625   | 0             | 1         | 1        |
| Alg3_j2          | 2.61387    | 2.4636    | -0.0854208    | 0.494886  | 0.782608 |
| Camk2n2_j1       | 0.622255   | 0.813981  | 0.38749       | 0.28207   | 0.630591 |
| Ehhadh_j3        | 0          | 0.0835063 | 1.79769e+308  | 0.0345552 | 1        |
| Igf2bp2_j2       | 0.0654072  | 0         | -1.79769e+308 | 0.0324204 | 1        |
| Igf2bp2_j3       | 0          | 0.0986389 | 1.79769e+308  | 0.0203346 | 1        |
| Igf2bp2_j4       | 0          | 0.116124  | 1.79769e+308  | 0.0109713 | 1        |
| Fgf12_j7         | 103.392    | 73.9872   | 0             | 1         | 1        |
| Atp13a4_j4       | 0.00811649 | 0.08715   | 3.42457       | 0.417385  | 1        |
| XLOC_012832      | 0.23885    | 0.298345  | 0.320874      | 0.505141  | 0.788084 |
| Atp13a3_j6       | 0          | 0.13268   | 0             | 1         | 1        |
| Lsg1_j2          | 0          | 0.0485235 | 1.79769e+308  | 0.110302  | 1        |
| AI480653_j1      | 0.0822421  | 0.251521  | 0             | 1         | 1        |
| Acap2_j4         | 0.0932971  | 0.24885   | 0             | 1         | 1        |
| Ppp1r2_j2        | 100.059    | 89.1523   | -0.166508     | 0.0558788 | 0.276326 |
| 1700021K19Rik_j2 | 0.914599   | 1.08091   | 0             | 1         | 1        |
| Iqcg_j2          | 1.05706    | 0.882188  | 0             | 1         | 1        |
| Iqcg_j1          | 0.0418984  | 0.11102   | 0             | 1         | 1        |
| Kalrn_j6         | 0.26713    | 0.692332  | 0             | 1         | 1        |
| Kalrn_j4         | 0.364983   | 0.219557  | 0             | 1         | 1        |
| Kalrn_j3         | 0.152753   | 0.136942  | 0             | 1         | 1        |
| Kalrn_j5         | 0.363748   | 0.350127  | 0             | 1         | 1        |
| Kalrn_j9         | 0.649084   | 0.352157  | 0             | 1         | 1        |
| Kalrn_j10        | 0.255539   | 0.42919   | 0             | 1         | 1        |
| Pdia5_j2         | 0.330872   | 0.611918  | 0             | 1         | 1        |
| Pdia5_j3         | 0.26618    | 0.761916  | 0             | 1         | 1        |
| Parp14_j2        | 0.109246   | 0.116802  | 0.0964866     | 0.85334   | 1        |
| Stfa2_j2         | 0.0510076  | 0.358538  | 2.81334       | 0.30955   | 0.654179 |
| Stfa2_j3         | 0          | 0.263403  | 1.79769e+308  | 0.0947374 | 0.379518 |
| Slc15a2_j8       | 0.128115   | 0.16899   | 0.399499      | 0.712361  | 0.895711 |
| Stxbp5l_j4       | 0.179555   | 0.302066  | 0             | 1         | 1        |
| Gtf2e1_j1        | 0.904885   | 0.855302  | 0             | 1         | 1        |
| Ndufb4_j1        | 0.657829   | 0.688652  | 0.0660618     | 0.851509  | 0.952852 |
| Gap43_j1         | 126.556    | 316.584   | 1.32281       | 0         | 0        |
| Qtrtd1_j7        | 0.259346   | 0.693709  | 0             | 1         | 1        |
| Zdhhc23_j1       | 0.130409   | 0.151426  | 0             | 1         | 1        |
| Atp6v1a_j1       | 49.6871    | 49.5498   | 0             | 1         | 1        |
| Boc_j5           | 0.211426   | 0.31638   | 0             | 1         | 1        |
| Tmprss7_j1       | 0.0636454  | 0.0412778 | -0.624691     | 0.742896  | 1        |
| Tmprss7_j2       | 0.146461   | 0.15335   | 0.0663053     | 0.932535  | 0.979532 |
| Tagln3_j1        | 83.9402    | 81.266    | 0             | 1         | 1        |
| Abhd10_j1        | 24.1682    | 23.8184   | 0             | 1         | 1        |
| Phldb2_j5        | 0.328363   | 0.0349796 | 0             | 1         | 1        |
| Picxd2_j2        | 1.67892    | 1.09437   | 0             | 1         | 1        |
| Bbx_j14          | 0.0541076  | 0.559948  | 0             | 1         | 1        |
| Bbx_j15          | 0.0399659  | 0.0800701 | 0             | 1         | 1        |

|                  |           |           |              |           |           |
|------------------|-----------|-----------|--------------|-----------|-----------|
| 5330426P16Rik_j4 | 0.504641  | 0.592172  | 0.230758     | 0.54636   | 0.81297   |
| Alcam_j7         | 9.09757   | 8.88559   | 0            | 1         | 1         |
| Pcnp_j1          | 0.788929  | 1.1985    | 0.603262     | 0.0950363 | 0.380496  |
| Tmem45a_j1       | 0.169431  | 0.157841  | -0.102228    | 0.903655  | 0.969148  |
| Tmem45a          | 0.0687901 | 0.142324  | 1.04891      | 0.340988  | 1         |
| Tbc1d23_j3       | 0.396187  | 0.342458  | 0            | 1         | 1         |
| XLOC_012932      | 0.10187   | 0.16169   | 0.666512     | 0.482957  | 0.77583   |
| Epha3_j2         | 3.69E-05  | 0.140235  | 11.8932      | 0.903291  | 1         |
| Epha3            | 0.139843  | 0.209936  | 0.586143     | 0.160083  | 0.49462   |
| Robo2_j6         | 0.0986466 | 0.0413155 | 0            | 1         | 1         |
| XLOC_012946      | 0.772072  | 0.844759  | 0.129805     | 0.53388   | 0.805306  |
| Nrip1_j5         | 1.12906   | 1.54009   | 0            | 1         | 1         |
| AK087725_j4      | 0.0835253 | 0.262014  | 1.64936      | 0.224558  | 0.571654  |
| AK087725_j5      | 0         | 0.111461  | 1.79769e+308 | 0.0704617 | 1         |
| Mrpl39_j6        | 0.349599  | 0.264162  | -0.404281    | 0.6965    | 0.888126  |
| Atp5j_j1         | 7.14233   | 14.4981   | 0            | 1         | 1         |
| Atp5j_j2         | 13.3708   | 46.6013   | 0            | 1         | 1         |
| App_j2           | 8.59829   | 14.8079   | 0            | 1         | 1         |
| App_j3           | 21.9305   | 31.189    | 0            | 1         | 1         |
| App              | 26.8054   | 34.6204   | 0            | 1         | 1         |
| Ltn1_j6          | 0.588922  | 0.70428   | 0            | 1         | 1         |
| Cct8_j2          | 73.1643   | 75.5539   | 0            | 1         | 1         |
| Cct8_j3          | 1.16412   | 1.28358   | 0            | 1         | 1         |
| XLOC_012964      | 0.104809  | 0.314572  | 1.58563      | 0.00092   | 0.0133705 |
| XLOC_012964      | 0         | 0.0478108 | 1.79769e+308 | 0.11252   | 1         |
| Urb1_j9          | 0.281865  | 0.397057  | 0.494341     | 0.162953  | 0.498187  |
| Synj1_j3         | 0.189007  | 0.62286   | 0            | 1         | 1         |
| Synj1_j2         | 1.44258   | 1.3161    | 0            | 1         | 1         |
| Gcfc1_j1         | 2.02554   | 2.2162    | 0            | 1         | 1         |
| Gcfc1            | 0         | 0.115709  | 0            | 1         | 1         |
| Tmem50b_j3       | 0.155464  | 0.419199  | 0            | 1         | 1         |
| Atp5o_j1         | 0         | 0.331125  | 1.79769e+308 | 0.0594096 | 0.286574  |
| Runx1_j3         | 0.36056   | 0.358968  | 0            | 1         | 1         |
| Runx1_j4         | 0         | 0.0471139 | 0            | 1         | 1         |
| XLOC_012983      | 0.02388   | 0.102191  | 0            | 1         | 1         |
| XLOC_012983      | 0.382992  | 0.725307  | 0            | 1         | 1         |
| Cldn14_j2        | 0         | 0.0506539 | 1.79769e+308 | 0.128247  | 1         |
| Cldn14_j1        | 0         | 0.0960133 | 1.79769e+308 | 0.0635784 | 1         |
| Hlcs_j5          | 2.86468   | 2.70227   | 0            | 1         | 1         |
| Brwd1_j1         | 0.425505  | 0.509479  | 0            | 1         | 1         |
| Mx1_j1           | 0         | 0.153553  | 1.79769e+308 | 0.0063668 | 1         |
| Ripk4_j4         | 0         | 0.138435  | 1.79769e+308 | 0.0721714 | 1         |
| Prdm15_j7        | 0.206478  | 0.269151  | 0            | 1         | 1         |
| Scaf8_j1         | 0.915306  | 0.517339  | 0            | 1         | 1         |
| XLOC_013763      | 0.324045  | 0.0486457 | -2.73581     | 0.0283934 | 0.179151  |
| Arid1b           | 0.250484  | 0.140267  | 0            | 1         | 1         |
| Arid1b_j3        | 6.30448   | 6.57764   | 0            | 1         | 1         |

|                  |           |                 |            |           |           |
|------------------|-----------|-----------------|------------|-----------|-----------|
| Arid1b_j4        | 0.1831    | 0.000239882     | 0          | 1         | 1         |
| Zdhhc14          | 0.382529  | 0.266899        | -0.519272  | 0.0962859 | 0.383138  |
| Zdhhc14_j5       | 0.826441  | 0.959772        | 0.215781   | 0.63028   | 0.856283  |
| XLOC_013767      | 0.178848  | 0.0813602       | -1.13634   | 0.204552  | 0.548696  |
| Snx9             | 7.03792   | 6.11616         | 0          | 1         | 1         |
| Snx9_j3          | 0.10852   | 0               | 0          | 1         | 1         |
| Synj2_j4         | 0.631554  | 0.353298        | 0          | 1         | 1         |
| Gtf2h5           | 17.4443   | 18.7584         | 0.104778   | 0.28905   | 0.63673   |
| Tulp4_j2         | 0.0563994 | 0.00829087      | -2.76608   | 0.0258687 | 1         |
| Tmem181a         | 0.529466  | 0.286312        | 0          | 1         | 1         |
| Dynlt1c_j1       | 0.637112  | 0.637935        | 0.0018614  | 0.997614  | 0.999228  |
| Syt13            | 7.16661   | 7.39074         | 0          | 1         | 1         |
| Rnaset2b_j1      | 4.31552   | 4.87954         | 0.177209   | 0.40079   | 0.724158  |
| Rnaset2b         | 0.380653  | 0.343286        | -0.149066  | 0.593047  | 0.83794   |
| Rnaset2b_j2      | 7.36774   | 8.16146         | 0.147606   | 0.501109  | 0.785318  |
| Rnaset2b_j3      | 3.89071   | 4.15216         | 0.0938265  | 0.807852  | 0.936731  |
| Rps6ka2          | 19.9491   | 17.9794         | 0          | 1         | 1         |
| Rps6ka2_j4       | 0.0509235 | 0               | 0          | 1         | 1         |
| Rsph3a           | 12.6398   | 13.0692         | 0.0482001  | 0.668449  | 0.874474  |
| Fgfr1op          | 5.92341   | 5.36714         | -0.142275  | 0.301304  | 0.64765   |
| Sft2d1_j2        | 6.72138   | 7.86375         | 0.226461   | 0.276097  | 0.624922  |
| Pde10a           | 0.962282  | 0.757603        | 0          | 1         | 1         |
| 1700010I14Rik_j3 | 0.118188  | 0.0234879       | -2.33109   | 0.157811  | 1         |
| 1700010I14Rik    | 0.158733  | 0.225748        | 0.508113   | 0.417594  | 0.734655  |
| Park2_j2         | 0.203392  | 0 -1.79769e+308 |            | 4.47E-06  | 0.000153  |
| Park2_j3         | 0.759177  | 0.655447        | -0.211957  | 0.345982  | 0.685212  |
| Agpat4           | 17.4739   | 20.2649         | 0          | 1         | 1         |
| XLOC_013794      | 0.235531  | 0.175663        | 0          | 1         | 1         |
| Slc22a2_j2       | 0.308616  | 0.118173        | -1.38491   | 0.176322  | 0.515018  |
| Airn             | 1.40958   | 0.807332        | 0          | 1         | 1         |
| Tcp1_j1          | 1.03686   | 0.848473        | -0.289282  | 0.301871  | 0.648067  |
| XLOC_013801      | 0.0998015 | 0.089677        | -0.154325  | 0.882505  | 1         |
| Sod2             | 0.242798  | 0.123919        | -0.970357  | 0.103998  | 0.399912  |
| Sod2_j3          | 10.5487   | 11.3932         | 0.111105   | 0.50445   | 0.787712  |
| Tcp10a_j1        | 0.108749  | 0.10647         | -0.0305601 | 0.971417  | 1         |
| Mllt4_j5         | 0.912482  | 0.414678        | 0          | 1         | 1         |
| Smoc2            | 3.69786   | 5.0804          | 0.45825    | 0.0017664 | 0.0226162 |
| Fam120b_j2       | 8.15009   | 7.4661          | 0          | 1         | 1         |
| Fam120b          | 1.8942    | 1.37395         | 0          | 1         | 1         |
| Chd1             | 0.748495  | 0.675871        | 0          | 1         | 1         |
| Chd1_j4          | 0.446433  | 0               | 0          | 1         | 1         |
| Riok2            | 9.57125   | 9.17698         | -0.0606881 | 0.625943  | 0.854009  |
| Lix1_j4          | 72.3807   | 65.755          | 0          | 1         | 1         |
| XLOC_013822      | 0.110383  | 0.0823722       | -0.422283  | 0.602775  | 1         |
| XLOC_013822      | 0.15609   | 0.101986        | -0.613997  | 0.488025  | 0.778578  |
| 4930546H06Rik_j1 | 0.488023  | 0.533901        | 0.129624   | 0.796394  | 0.932066  |
| 4930546H06Rik_j6 | 0.308368  | 0.268775        | -0.198256  | 0.548501  | 0.814203  |

|                  |           |                 |             |           |          |
|------------------|-----------|-----------------|-------------|-----------|----------|
| 4930546H06Rik_j5 | 0.338347  | 0.316384        | -0.0968279  | 0.756616  | 0.916114 |
| XLOC_013825      | 0.206352  | 0.0483764       | -2.09274    | 0.0264441 | 0.170811 |
| Ppp2r1a          | 64.836    | 58.0218         | 0           | 1         | 1        |
| Ppp2r1a_j1       | 14.0316   | 27.2062         | 0           | 1         | 1        |
| Zfp160           | 2.44629   | 2.25228         | -0.119213   | 0.471502  | 0.769039 |
| Zfp677           | 0.22215   | 0.262775        | 0.242295    | 0.663118  | 0.872404 |
| Zfp677           | 0.907289  | 0.891745        | -0.0249319  | 0.925386  | 0.976852 |
| Zfp677_j3        | 0.238937  | 1.92E-05        | -13.6005    | 0.978024  | 0.993706 |
| Zfp948_j3        | 3.68502   | 4.5176          | 0           | 1         | 1        |
| Zfp943           | 3.57072   | 2.11924         | 0           | 1         | 1        |
| Hcfc1r1          | 9.52808   | 8.37842         | -0.185509   | 0.296079  | 0.642856 |
| Hcfc1r1_j1       | 0.528984  | 0.371876        | -0.508403   | 0.49411   | 0.782398 |
| Hcfc1r1_j3       | 42.098    | 46.1533         | 0.132682    | 0.349817  | 0.687467 |
| Srrm2_j4         | 9.04011   | 9.74909         | 0           | 1         | 1        |
| Prss32           | 0.0981434 | 0 -1.79769e+308 |             | 0.0104204 | 1        |
| Abca3            | 0.736503  | 0.577286        | -0.351405   | 0.20656   | 0.55114  |
| Rnps1_j6         | 0.406699  | 0.535148        | 0.395975    | 0.270804  | 0.620012 |
| Dci              | 4.63465   | 3.97876         | -0.220143   | 0.312827  | 0.657266 |
| Pgp              | 26.5487   | 28.8962         | 0.122236    | 0.363     | 0.697185 |
| XLOC_013856      | 0.0651914 | 0               | 0           | 1         | 1        |
| Caskin1          | 13.8261   | 11.4906         | 0           | 1         | 1        |
| AK011460         | 4.35963   | 4.60602         | 0.079313    | 0.801194  | 0.933726 |
| Nthl1            | 1.45085   | 1.97162         | 0.442481    | 0.092954  | 0.375025 |
| Zfp598_j1        | 2.14035   | 1.77631         | 0           | 1         | 1        |
| Zfp598           | 4.6247    | 4.48342         | 0           | 1         | 1        |
| Zfp598_j4        | 2.86139   | 3.12536         | 0           | 1         | 1        |
| Sepx1            | 53.2039   | 60.6547         | 0.189088    | 0.0545921 | 0.272507 |
| Sepx1_j1         | 9.64433   | 11.8274         | 0.294377    | 0.339894  | 0.68005  |
| Hs3st6           | 1.09845   | 0.53414         | -1.04018    | 0.0141266 | 0.110193 |
| Hs3st6_j2        | 0.109941  | 0.197458        | 0.844809    | 0.448355  | 0.75486  |
| Hagh_j2          | 47.4872   | 52.2896         | 0           | 1         | 1        |
| Hagh_j4          | 0.0374692 | 0.0688756       | 0           | 1         | 1        |
| Hagh             | 25.6245   | 25.7966         | 0           | 1         | 1        |
| Igfals_j1        | 0.112463  | 0.0296939       | -1.92121    | 0.127928  | 1        |
| Ift140           | 2.20622   | 2.10223         | 0           | 1         | 1        |
| Clcn7            | 10.0684   | 10.021          | -0.00680489 | 0.949075  | 0.985323 |
| BC003965         | 2.79297   | 2.61479         | -0.0951019  | 0.533174  | 0.80489  |
| Unkl_j2          | 3.65113   | 3.18525         | 0           | 1         | 1        |
| AK079380_j1      | 0.746777  | 0.965288        | 0.370282    | 0.415077  | 0.733098 |
| AK079380         | 1.96359   | 1.94815         | -0.0113849  | 0.968026  | 0.990986 |
| AK079380_j3      | 0.623785  | 0.657352        | 0.075619    | 0.897767  | 0.967468 |
| Lmf1_j1          | 1.07814   | 1.06821         | 0           | 1         | 1        |
| Rpusd1           | 8.26997   | 7.3186          | 0           | 1         | 1        |
| Narfl_j2         | 4.26745   | 4.37951         | 0.0373942   | 0.759107  | 0.917041 |
| Ccdc78_j4        | 1.76012   | 2.00483         | 0.187802    | 0.206266  | 0.550755 |
| Fbxl16           | 9.97031   | 6.92041         | 0           | 1         | 1        |
| Fbxl16_j4        | 5.40504   | 0.339287        | 0           | 1         | 1        |



|                  |           |           |               |           |           |
|------------------|-----------|-----------|---------------|-----------|-----------|
| Fbxl16_j3        | 8.7586    | 16.7946   | 0             | 1         | 1         |
| Wdr24            | 6.189     | 5.61813   | -0.139617     | 0.277786  | 0.626672  |
| Jmjd8            | 2.88883   | 2.99398   | 0.0515761     | 0.620024  | 0.850928  |
| O610011F06Rik_j2 | 6.42711   | 6.63835   | 0.0466549     | 0.86337   | 0.956634  |
| O610011F06Rik_j1 | 5.72484   | 5.47101   | -0.0654288    | 0.72266   | 0.901249  |
| O610011F06Rik    | 5.47067   | 5.49962   | 0.00761612    | 0.97036   | 0.991599  |
| Tmem8_j2         | 0.443269  | 0.422973  | -0.0676158    | 0.893861  | 0.966325  |
| Tmem8_j1         | 5.19243   | 4.22597   | -0.297129     | 0.100016  | 0.391628  |
| Mrpl28           | 38.5828   | 45.5517   | 0.239548      | 0.0179386 | 0.130623  |
| Axin1            | 0.777135  | 1.15983   | 0.577679      | 0.032034  | 0.194047  |
| Axin1            | 3.84177   | 3.99053   | 0.0548077     | 0.703618  | 0.89151   |
| Rgs11_j1         | 4.12052   | 3.62482   | -0.184918     | 0.206254  | 0.550755  |
| Luc7l            | 10.2934   | 9.47074   | -0.120175     | 0.229084  | 0.576167  |
| Ergic1           | 30.506    | 32.52     | 0.0922307     | 0.320405  | 0.663678  |
| Atp6v0e_j1       | 17.4789   | 17.7434   | 0             | 1         | 1         |
| A930001N09Rik_j2 | 0.371798  | 0         | 0             | 1         | 1         |
| Kifc5b_j5        | 0.0490577 | 0         | -1.79769e+308 | 0.041696  | 1         |
| Tctex-3          | 0.0905886 | 0.109459  | 0             | 1         | 1         |
| Phf1             | 14.0872   | 12.7753   | 0             | 1         | 1         |
| XLOC_013900      | 0.96495   | 0.946561  | 0             | 1         | 1         |
| Zbtb9            | 0.531867  | 0.684556  | 0             | 1         | 1         |
| Zbtb9_j1         | 2.58778   | 1.24882   | 0             | 1         | 1         |
| Ggnbp1           | 1.13754   | 1.04651   | -0.120325     | 0.650908  | 0.866065  |
| Itpr3            | 3.27654   | 3.11286   | 0             | 1         | 1         |
| Itpr3_j4         | 1.08648   | 0.571461  | 0             | 1         | 1         |
| Itpr3_j5         | 7.20751   | 8.29145   | 0             | 1         | 1         |
| Pacsin1          | 18.796    | 12.7628   | 0             | 1         | 1         |
| Pacsin1_j2       | 29.6985   | 24.4179   | 0             | 1         | 1         |
| Uhrf1bp1         | 2.03643   | 2.12231   | 0.0595925     | 0.650402  | 0.86582   |
| Anks1_j5         | 4.84936   | 6.19154   | 0             | 1         | 1         |
| Scube3_j2        | 0.0642274 | 0.0629045 | -0.0300243    | 0.979299  | 1         |
| Scube3_j1        | 0.0681028 | 0.0270114 | -1.33415      | 0.276775  | 1         |
| Scube3_j4        | 0.0675623 | 0.0295003 | -1.19549      | 0.518479  | 1         |
| Zfp523_j3        | 9.36755   | 9.83936   | 0.0708929     | 0.560353  | 0.821088  |
| Zfp523_j5        | 5.55347   | 5.61498   | 0.0158895     | 0.922727  | 0.975933  |
| Def6             | 4.78143   | 4.57913   | 0             | 1         | 1         |
| Ppard            | 3.70946   | 5.19249   | 0.485217      | 0.0006    | 0.0094829 |
| Fance_j6         | 0.826407  | 0.357217  | -1.21005      | 0.0321945 | 0.194595  |
| Fance_j5         | 0.542923  | 0.0161379 | -5.07222      | 0.03322   | 0.198867  |
| Fance            | 0         | 0.204123  | 1.79769e+308  | 0.015795  | 0.1192    |
| Rpl10a_j1        | 0.120386  | 0.133531  | 0.149504      | 0.844426  | 1         |
| Lhfp15           | 9.3292    | 8.06806   | -0.209531     | 0.109778  | 0.412306  |
| Mapk14           | 10.9705   | 11.4445   | 0             | 1         | 1         |
| Mapk14_j2        | 0.925523  | 0.936367  | 0             | 1         | 1         |
| Mapk13           | 0.868644  | 0.938056  | 0.110909      | 0.641783  | 0.861896  |
| Kctd20           | 20.329    | 14.737    | 0             | 1         | 1         |
| Sfrs3_j6         | 2.46534   | 1.96604   | -0.326494     | 0.191925  | 0.534088  |

|                  |             |                        |            |           |           |
|------------------|-------------|------------------------|------------|-----------|-----------|
| Sfrs3_j7         | 0.000618433 | 0.463609               | 9.55008    | 0.551114  | 0.815748  |
| Cdkn1a           | 15.3328     | 31.9234                | 0          | 1         | 1         |
| BC004004         | 29.9284     | 31.578                 | 0          | 1         | 1         |
| BC004004_j4      | 6.25602     | 5.19771                | 0          | 1         | 1         |
| Pi16             | 0.412334    | 0.492101               | 0.255141   | 0.496695  | 0.783486  |
| Pi16_j3          | 0.132032    | 0 -1.79769e+308        |            | 0.0054292 | 1         |
| Fgd2_j5          | 0.187209    | 0.29912                | 0.676072   | 0.168612  | 0.505261  |
| Pim1             | 5.30106     | 6.07357                | 0.196265   | 0.15576   | 0.489016  |
| Tbc1d22b         | 7.13759     | 6.59433                | -0.114209  | 0.33935   | 0.679562  |
| Rnf8             | 8.12166     | 8.78509                | 0.113283   | 0.355191  | 0.691124  |
| Ftsjd2           | 11.8537     | 12.454                 | 0.0712752  | 0.448349  | 0.75486   |
| Zfand3           | 0.835913    | 0.550521               | -0.602555  | 0.262237  | 0.611336  |
| Zfand3_j3        | 0.180762    | 0 -1.79769e+308        |            | 0.0544504 | 0.272193  |
| Abcg1            | 5.97465     | 4.34353                | 0          | 1         | 1         |
| Abcg1_j1         | 6.1587      | 5.58983                | 0          | 1         | 1         |
| Slc37a1_j2       | 0.36345     | 0.186884               | 0          | 1         | 1         |
| Slc37a1          | 1.26383     | 1.93745                | 0          | 1         | 1         |
| Pde9a            | 0.33274     | 0.303852               | -0.131031  | 0.774346  | 0.92355   |
| Pde9a_j2         | 0           | 0.0980955 1.79769e+308 |            | 0.048466  | 1         |
| Ndufv3           | 89.1823     | 94.5117                | 0.083735   | 0.417486  | 0.734597  |
| Pknox1           | 1.74506     | 0.910413               | 0          | 1         | 1         |
| Rrp1b            | 0.838478    | 0.961684               | 0.197789   | 0.396974  | 0.72142   |
| Rrp1b_j5         | 0.304878    | 0.217072               | -0.490059  | 0.299651  | 0.646333  |
| Cyp4f39          | 2.55883     | 1.99648                | -0.35802   | 0.0073002 | 0.0680375 |
| Cyp4f39_j1       | 0.0546656   | 0.0283772              | -0.945902  | 0.370748  | 1         |
| Cyp4f16_j3       | 0.531595    | 0.686396               | 0          | 1         | 1         |
| XLOC_013948      | 0.0902135   | 0 -1.79769e+308        |            | 0.0401135 | 1         |
| XLOC_013948      | 0.0690005   | 0.163986               | 1.24889    | 0.391258  | 0.717886  |
| XLOC_013948      | 0.212877    | 0.216843               | 0.0266283  | 0.9566    | 0.987617  |
| C920016K16Rik_j1 | 1.25262     | 0.930081               | 0          | 1         | 1         |
| Zfp472           | 1.1068      | 1.12452                | 0          | 1         | 1         |
| Zfp952           | 1.44233     | 1.35329                | 0          | 1         | 1         |
| Zfp563_j1        | 0.981759    | 0.74774                | -0.392832  | 0.0240527 | 0.159943  |
| Zfp955b_j1       | 0.742004    | 0.571286               | -0.377214  | 0.168947  | 0.505751  |
| Zfp955b          | 2.42281     | 1.83621                | -0.399955  | 0.0059243 | 0.0579222 |
| Adamts10_j1      | 0.142602    | 0.136404               | -0.0641115 | 0.921407  | 0.975363  |
| Adamts10_j2      | 0.285018    | 7.14E-05               | -11.9628   | 0.850093  | 0.952362  |
| Adamts10_j13     | 0.69026     | 0.911495               | 0.401096   | 0.13184   | 0.451809  |
| Myo1f_j4         | 0.0500743   | 0 -1.79769e+308        |            | 0.0079386 | 1         |
| Myo1f_j6         | 0.336086    | 0.639309               | 0.927682   | 0.083976  | 0.353567  |
| Pram1_j4         | 7.14339     | 6.52753                | 0          | 1         | 1         |
| Pram1_j5         | 0.0768835   | 0.00684215             | -3.49015   | 0.079844  | 1         |
| Kank3_j6         | 2.2507      | 2.27296                | 0.0142002  | 0.959269  | 0.988354  |
| Ndufa7           | 3.09312     | 3.72812                | 0.269386   | 0.164174  | 0.500094  |
| Ndufa7_j4        | 0.886734    | 0 -1.79769e+308        |            | 0.0016101 | 0.0209504 |
| Cd320            | 8.49608     | 8.07744                | -0.0728993 | 0.609902  | 0.846292  |
| Daxx             | 0.835527    | 0.871102               | 0.0601558  | 0.81211   | 0.938348  |

|                |           |                 |              |           |           |
|----------------|-----------|-----------------|--------------|-----------|-----------|
| Tapbp_j1       | 1.19711   | 0.883276        | -0.43862     | 0.144167  | 0.471148  |
| Tapbp_j3       | 15.6848   | 14.8902         | -0.0749983   | 0.421723  | 0.737886  |
| Rgl2_j9        | 0.44617   | 0 -1.79769e+308 |              | 1.64E-08  | 1.10E-06  |
| Rgl2           | 1.47919   | 2.24029         | 0.598876     | 0.0082182 | 0.0741192 |
| Rgl2_j13       | 0.140696  | 0.146769        | 0.0609601    | 0.941997  | 0.982346  |
| Wdr46          | 2.85782   | 3.68305         | 0.365985     | 0.0179371 | 0.130623  |
| Vps52          | 1.26994   | 1.59942         | 0            | 1         | 1         |
| Vps52_j2       | 12.3518   | 11.2439         | 0            | 1         | 1         |
| Col11a2_j3     | 0.290935  | 0.626056        | 1.10559      | 5.87E-05  | 0.0013639 |
| H2-Oa          | 0.124341  | 0.152254        | 0.292178     | 0.692575  | 1         |
| H2-DMb2_j1     | 0.0480339 | 0 -1.79769e+308 |              | 0.119182  | 1         |
| H2-DMb1        | 1.51684   | 2.68413         | 0.823386     | 0.0004173 | 0.0070041 |
| Tap1           | 1.32498   | 1.11844         | -0.244487    | 0.191742  | 0.533938  |
| Psemb8_j2      | 10.2665   | 10.8489         | 0.0796032    | 0.585046  | 0.833873  |
| Tap2           | 10.1336   | 10.2008         | 0.00954041   | 0.934113  | 0.979958  |
| Tap2_j1        | 1.0122    | 0.56335         | -0.845393    | 0.0510566 | 0.261892  |
| H2-Ab1         | 19.0599   | 34.6451         | 0.862113     | 3.55E-15  | 7.12E-13  |
| H2-Eb1         | 22.3109   | 39.2883         | 0.816354     | 2.53E-14  | 4.60E-12  |
| BC051142_j3    | 0.220348  | 0.10199         | -1.11136     | 0.442564  | 0.750634  |
| BC051142_j4    | 0.30039   | 0.0560287       | -2.4226      | 0.122747  | 0.436124  |
| IAP_j5         | 0.800316  | 0.863067        | 0.108903     | 0.746404  | 0.911671  |
| Ager_j3        | 0.521587  | 0.681047        | 0            | 1         | 1         |
| Pbx2_j1        | 8.22722   | 8.1823          | 0            | 1         | 1         |
| Agpat1         | 39.9804   | 39.9589         | -0.000775075 | 0.993929  | 0.99828   |
| Prnt1          | 1.15744   | 1.16792         | 0.0129968    | 0.94947   | 0.985359  |
| Prnt1_j1       | 0.535494  | 0.123779        | -2.1131      | 0.0175412 | 0.128567  |
| Prnt1_j4       | 0.670844  | 0.504461        | -0.411234    | 0.342073  | 0.681849  |
| Fkbp1_j1       | 0.871014  | 1.15165         | 0.402934     | 0.199005  | 0.542173  |
| Fkbp1          | 3.30763   | 2.93648         | -0.171713    | 0.35569   | 0.691547  |
| Atf6b          | 18.3294   | 21.2905         | 0.216053     | 0.0303676 | 0.187243  |
| Tnxb_j4        | 0.0888667 | 0 -1.79769e+308 |              | 1.11E-07  | 1         |
| Tnxb_j3        | 0.0754153 | 0.02694         | -1.48511     | 0.0466835 | 1         |
| Rdbp           | 0         | 0.0696927       | 0            | 1         | 1         |
| Rdbp           | 0.246927  | 0.527234        | 0            | 1         | 1         |
| Ehmt2          | 12.7265   | 12.6274         | 0            | 1         | 1         |
| Ehmt2_j4       | 1.25926   | 1.07669         | 0            | 1         | 1         |
| Neu1           | 7.37503   | 7.43755         | 0.0121789    | 0.915731  | 0.973698  |
| Lsm2           | 1.07277   | 0.981506        | -0.128278    | 0.504346  | 0.787625  |
| Vars           | 9.72305   | 9.09576         | 0            | 1         | 1         |
| D17H6S56E-3_j2 | 1.51782   | 0.667732        | 0            | 1         | 1         |
| D17H6S56E-3    | 4.29788   | 3.33927         | 0            | 1         | 1         |
| D17H6S56E-3_j1 | 0.868662  | 0.397121        | 0            | 1         | 1         |
| Ddah2_j1       | 22.8713   | 35.7953         | 0            | 1         | 1         |
| Ddah2_j2       | 4.98006   | 0.337611        | 0            | 1         | 1         |
| Abhd16a        | 47.5408   | 47.22           | -0.00976889  | 0.914646  | 0.973351  |
| D17H6S53E      | 0.580622  | 0.656644        | 0            | 1         | 1         |
| D17H6S53E_j1   | 0.363045  | 0.182551        | 0            | 1         | 1         |

|                  |          |                 |             |           |           |
|------------------|----------|-----------------|-------------|-----------|-----------|
| Bat3_j2          | 1.00903  | 0.0101214       | 0           | 1         | 1         |
| Bat3_j6          | 2.01513  | 2.56191         | 0           | 1         | 1         |
| Bat3_j14         | 0.892425 | 0.589025        | 0           | 1         | 1         |
| Atp6v1g2_j2      | 0.422167 | 0 -1.79769e+308 | 7.97E-07    | 3.42E-05  |           |
| Bat1a            | 4.23126  | 4.6654          | 0           | 1         | 1         |
| H2-D1            | 3.19545  | 4.45462         | 0.479282    | 0.0186391 | 0.134338  |
| Cchcr1           | 0.376474 | 1.04347         | 1.47077     | 6.39E-06  | 0.0002099 |
| Ier3             | 12.9085  | 12.3742         | -0.0609887  | 0.655537  | 0.868388  |
| Flot1            | 29.754   | 37.2362         | 0           | 1         | 1         |
| Mdc1_j4          | 0.063996 | 0.0434533       | 0           | 1         | 1         |
| 2310014H01Rik    | 0.491319 | 0.605977        | 0           | 1         | 1         |
| 2310014H01Rik    | 9.19651  | 11.9884         | 0           | 1         | 1         |
| Dhx16_j2         | 0.983955 | 0.885352        | 0           | 1         | 1         |
| Dhx16_j3         | 2.0049   | 1.85395         | 0           | 1         | 1         |
| Ppp1r10_j2       | 0.204454 | 0.188092        | 0           | 1         | 1         |
| Gnl1             | 2.26169  | 2.04428         | 0           | 1         | 1         |
| H2-M11_j1        | 0.94853  | 1.01506         | 0.0977985   | 0.779407  | 0.925607  |
| H2-M11_j2        | 0.314942 | 0.211989        | -0.571098   | 0.508976  | 0.790628  |
| Trim26           | 9.63838  | 10.6465         | 0.143514    | 0.185509  | 0.525826  |
| Trim26_j3        | 0.212847 | 0.22993         | 0.111379    | 0.776556  | 0.924496  |
| Trim26_j1        | 0.328325 | 0.448466        | 0.449874    | 0.133235  | 0.454201  |
| Znrd1as          | 0.742645 | 0.786326        | 0.0824548   | 0.789917  | 0.929965  |
| Zfp57            | 0.69576  | 0.881205        | 0.340887    | 0.29545   | 0.642035  |
| Zfp57            | 0.220871 | 0.249755        | 0.177309    | 0.709966  | 0.894313  |
| Zfp57_j1         | 0.303726 | 0.363935        | 0.260911    | 0.493318  | 0.781804  |
| Gabbr1           | 7.35779  | 6.63495         | 0           | 1         | 1         |
| Gabbr1_j2        | 0.20233  | 0.0248622       | 0           | 1         | 1         |
| H2-M3            | 4.19764  | 3.90381         | -0.104695   | 0.557945  | 0.819817  |
| Mut              | 5.01206  | 4.65193         | 0           | 1         | 1         |
| Mut_j1           | 5.88146  | 5.09618         | 0           | 1         | 1         |
| 3110082D06Rik_j3 | 0.256637 | 0.192631        | -0.413886   | 0.231562  | 0.578702  |
| Tnfrsf21         | 13.4786  | 15.4205         | 0.194176    | 0.0511095 | 0.261939  |
| Gpr116_j1        | 0.231122 | 0.189317        | 0           | 1         | 1         |
| Gpr116_j6        | 0.514042 | 0.424319        | 0           | 1         | 1         |
| Gpr116_j4        | 2.28831  | 1.93225         | 0           | 1         | 1         |
| Pla2g7_j1        | 23.4722  | 14.4317         | 0           | 1         | 1         |
| Pla2g7_j3        | 12.9612  | 12.7798         | 0           | 1         | 1         |
| Pla2g7_j4        | 21.7537  | 15.3139         | 0           | 1         | 1         |
| Cyp39a1          | 1.07574  | 0.908231        | -0.244204   | 0.155974  | 0.489436  |
| Rcan2            | 38.3376  | 29.0764         | 0           | 1         | 1         |
| Rcan2            | 6.48347  | 3.53912         | 0           | 1         | 1         |
| Rcan2_j2         | 44.621   | 36.6016         | 0           | 1         | 1         |
| Enpp5            | 1.1677   | 1.1146          | -0.067136   | 0.852966  | 0.953424  |
| Enpp5            | 22.2874  | 25.3648         | 0.186599    | 0.0649495 | 0.303328  |
| Clic5            | 0.40923  | 0.202457        | -1.0153     | 0.0073901 | 0.0685539 |
| Supt3h           | 14.6993  | 16.5627         | 0.172187    | 0.143408  | 0.470568  |
| AK046225         | 2.11887  | 2.11101         | -0.00536257 | 0.976353  | 0.993154  |

|               |           |                 |            |           |          |
|---------------|-----------|-----------------|------------|-----------|----------|
| Aars2         | 5.05728   | 5.17406         | 0.0329356  | 0.804659  | 0.935336 |
| Nfkbie        | 3.21524   | 2.49518         | -0.365782  | 0.0371351 | 0.213416 |
| Mrps18a       | 9.42256   | 9.16561         | -0.0398875 | 0.723617  | 0.901555 |
| Gtpbp2_j1     | 0.106951  | 0.0235575       | 0          | 1         | 1        |
| Gtpbp2_j2     | 0.642525  | 0.790229        | 0          | 1         | 1        |
| Xpo5          | 5.23565   | 5.24603         | 0.00285758 | 0.977367  | 0.993411 |
| Yipf3_j1      | 12.2901   | 12.9082         | 0.0707927  | 0.460701  | 0.762129 |
| Gm88          | 2.14116   | 2.45305         | 0.196185   | 0.312628  | 0.657178 |
| XLOC_014063   | 0.118456  | 0.122183        | 0.0446937  | 0.96068   | 1        |
| Zfp318        | 1.13425   | 0.741781        | 0          | 1         | 1        |
| Zfp318        | 4.98723   | 3.79403         | 0          | 1         | 1        |
| Crip3_j3      | 0.0917651 | 0.0352109       | -1.38192   | 0.22485   | 1        |
| BC048355      | 0.403139  | 0.584677        | 0          | 1         | 1        |
| XLOC_014068   | 0.131815  | 0.124363        | 0          | 1         | 1        |
| Mrpl2         | 24.9501   | 25.0892         | 0          | 1         | 1        |
| Cul7          | 10.579    | 10.1193         | -0.0640926 | 0.502545  | 0.786526 |
| Mea1          | 2.74122   | 2.87203         | 0.0672518  | 0.589215  | 0.836005 |
| Pex6          | 7.71764   | 7.4785          | 0          | 1         | 1        |
| 2310039H08Rik | 0.848627  | 0.47771         | -0.828994  | 0.161591  | 0.496542 |
| Trerf1_j5     | 0.288893  | 0 -1.79769e+308 |            | 2.07E-13  | 3.29E-11 |
| Trerf1_j7     | 0.310099  | 0.461971        | 0.575074   | 0.0526322 | 0.266469 |
| Trerf1_j11    | 0.406349  | 0.275666        | -0.559799  | 0.153711  | 0.486439 |
| Mrps10_j1     | 0.989956  | 1.31028         | 0          | 1         | 1        |
| Mrps10_j6     | 5.61274   | 5.32754         | 0          | 1         | 1        |
| Al661453_j1   | 0.0742629 | 0 -1.79769e+308 |            | 0.0141551 | 1        |
| Ccnd3         | 4.71881   | 5.04708         | 0.0970274  | 0.440808  | 0.749739 |
| Usp49_j3      | 0.271501  | 0.151747        | 0          | 1         | 1        |
| Usp49_j5      | 5.95096   | 8.32345         | 0          | 1         | 1        |
| Tcfef         | 3.54733   | 3.5134          | -0.013864  | 0.929389  | 0.978343 |
| Trem2         | 0.848742  | 2.35075         | 1.46973    | 3.34E-07  | 1.56E-05 |
| Trem2         | 0.167454  | 0.544392        | 1.70088    | 0.0267325 | 0.172103 |
| Al314976      | 0.116506  | 0.111134        | -0.0681013 | 0.906899  | 1        |
| Al314976_j2   | 0.139796  | 0.106729        | -0.389377  | 0.502358  | 0.78636  |
| Al314976      | 0.353581  | 0.338132        | -0.0644542 | 0.84706   | 0.951617 |
| Lrfn2         | 1.04073   | 1.01319         | 0          | 1         | 1        |
| Lrfn2_j3      | 0.629391  | 1.40887         | 0          | 1         | 1        |
| Plcl2         | 3.9561    | 4.88332         | 0.303784   | 0.0136528 | 0.107582 |
| Gm7334        | 5.44963   | 6.0826          | 0.158531   | 0.327169  | 0.670083 |
| Kcnh8         | 0.5634    | 0.527081        | -0.0961352 | 0.75695   | 0.916197 |
| Rab5a         | 24.0117   | 19.1845         | 0          | 1         | 1        |
| Rab5a_j2      | 27.6184   | 30.4677         | 0          | 1         | 1        |
| Kat2b_j1      | 0.459663  | 0.575794        | 0.324976   | 0.470199  | 0.768035 |
| Kat2b         | 3.09944   | 2.93223         | -0.0800126 | 0.604845  | 0.844102 |
| Kat2b_j4      | 0.979673  | 0.861154        | -0.186029  | 0.45766   | 0.76054  |
| XLOC_014098   | 16.1916   | 15.2388         | -0.0874988 | 0.526261  | 0.80098  |
| St6gal2_j1    | 0.425821  | 0.289187        | 0          | 1         | 1        |
| St6gal2_j5    | 0.0002247 | 0.256397        | 0          | 1         | 1        |

|               |             |                 |              |           |           |
|---------------|-------------|-----------------|--------------|-----------|-----------|
| Zfp959        | 0           | 0.0564147       | 1.79769e+308 | 0.0925429 | 1         |
| Zfp959_j10    | 0.307464    | 0.311621        | 0.0193749    | 0.974626  | 0.992758  |
| Ccdc94_j1     | 0.103749    | 0.0229649       | -2.1756      | 0.17388   | 1         |
| Shd           | 0.283682    | 0.017957        | -3.98165     | 0.0271071 | 0.173894  |
| Shd           | 0.000679717 | 0.228365        | 8.39219      | 0.49321   | 0.781695  |
| Fsd1          | 31.1529     | 30.8214         | -0.0154338   | 0.87206   | 0.959572  |
| Mpnd          | 0.0693999   | 0.0708223       | 0.0292703    | 0.960131  | 1         |
| Chaf1a        | 1.29255     | 1.09327         | -0.241564    | 0.155374  | 0.488431  |
| Hdgfrp2       | 5.4249      | 7.07648         | 0            | 1         | 1         |
| Kdm4b_j6      | 0.405108    | 0.676745        | 0.740306     | 0.0012107 | 0.0166609 |
| Kdm4b_j10     | 0.928322    | 1.26988         | 0.45199      | 0.158374  | 0.492583  |
| Safb          | 6.84986     | 5.00717         | 0            | 1         | 1         |
| Ranbp3        | 8.76846     | 9.31753         | 0            | 1         | 1         |
| Ranbp3_j2     | 5.40335     | 3.84985         | 0            | 1         | 1         |
| Ndufa11       | 20.8118     | 21.1084         | 0.0204175    | 0.869268  | 0.958425  |
| Dus3l_j6      | 3.45326     | 3.51744         | 0            | 1         | 1         |
| XLOC_014123   | 0.113247    | 0.0237898       | -2.25105     | 0.239095  | 1         |
| Clpp          | 14.7874     | 16.5258         | 0.160351     | 0.168552  | 0.505188  |
| Alkbh7_j1     | 3.14684     | 2.70705         | -0.21718     | 0.242904  | 0.590348  |
| Tnfsf9        | 0.166813    | 0.282376        | 0.759386     | 0.236456  | 0.583613  |
| Trip10_j3     | 0.118989    | 0.0678336       | 0            | 1         | 1         |
| Trip10        | 0.0471482   | 0.228117        | 0            | 1         | 1         |
| Vav1          | 0.293021    | 0.605204        | 1.04642      | 0.0009608 | 0.0138563 |
| Vav1_j2       | 0.0506339   | 0.225108        | 2.15244      | 0.0328383 | 0.197382  |
| Emr1_j2       | 0.108654    | 0.0181043       | -2.58533     | 0.113482  | 1         |
| Emr1          | 1.21406     | 2.8798          | 1.24613      | 3.25E-13  | 5.07E-11  |
| Cntnap5c_j3   | 0.277393    | 0.107738        | -1.3644      | 0.0039405 | 0.0424438 |
| Ppp4r1_j1     | 0.196614    | 0.159759        | 0            | 1         | 1         |
| Ppp4r1_j6     | 0.3035      | 0.556459        | 0            | 1         | 1         |
| XLOC_014135   | 0.0910037   | 0.0720313       | -0.337301    | 0.801687  | 1         |
| ORF19         | 6.69581     | 5.98216         | 0            | 1         | 1         |
| Ddx11_j2      | 0.0572003   | 0 -1.79769e+308 | 0.0043467    | 0.0043467 | 1         |
| Ddx11         | 0.0683334   | 0.256087        | 1.90597      | 0.0012248 | 0.0168166 |
| Ddx11_j1      | 0.104938    | 0.0635733       | -0.723041    | 0.366599  | 1         |
| Lama1_j2      | 0.087304    | 0 -1.79769e+308 | 0.0068774    | 0.0068774 | 1         |
| L3mbtl4_j1    | 0.321591    | 0.103588        | -1.63436     | 0.0033968 | 0.0380339 |
| L3mbtl4_j3    | 0.0969536   | 0.0745718       | -0.378664    | 0.545565  | 1         |
| L3mbtl4_j2    | 0.118448    | 0.0231806       | -2.35326     | 0.0360898 | 1         |
| Tmem200c      | 0.553022    | 0.521396        | -0.0849591   | 0.720221  | 0.899588  |
| Epb4.1l3_j3   | 32.0017     | 4.79437         | 0            | 1         | 1         |
| Epb4.1l3_j5   | 5.17606     | 7.74096         | 0            | 1         | 1         |
| Epb4.1l3_j6   | 0.35707     | 0               | 0            | 1         | 1         |
| Zfp161        | 1.34828     | 1.04273         | 0            | 1         | 1         |
| A330050F15Rik | 0.72341     | 0.656594        | -0.139811    | 0.615191  | 0.848168  |
| Dlgap1        | 2.64892     | 1.8656          | 0            | 1         | 1         |
| Dlgap1_j4     | 0.414663    | 0.000410474     | 0            | 1         | 1         |
| Dlgap1_j5     | 1.85024     | 2.50699         | 0            | 1         | 1         |

|               |           |            |               |           |           |
|---------------|-----------|------------|---------------|-----------|-----------|
| Myom1_j1      | 0.183947  | 0.075841   | -1.27824      | 0.034721  | 0.204635  |
| Myom1_j3      | 0.084223  | 0          | -1.79769e+308 | 0.0061962 | 1         |
| Myom1_j5      | 0.186745  | 0.269574   | 0.52961       | 0.240916  | 0.588146  |
| Lpin2_j1      | 3.46874   | 3.44359    | 0             | 1         | 1         |
| Lpin2         | 0.720733  | 0.372639   | 0             | 1         | 1         |
| Wdr43         | 5.69063   | 5.87586    | 0.0462131     | 0.701778  | 0.890441  |
| Fam179a_j1    | 0.636442  | 0.388511   | -0.712073     | 0.0431246 | 0.235574  |
| Fam179a_j10   | 0         | 0.110699   | 1.79769e+308  | 0.046095  | 1         |
| Fam179a_j11   | 0.369912  | 0.308384   | -0.262456     | 0.698049  | 0.888723  |
| Clip4_j2      | 0.811859  | 1.06948    | 0             | 1         | 1         |
| Clip4_j5      | 4.11675   | 2.41645    | 0             | 1         | 1         |
| Ypel5         | 48.6525   | 47.6146    | 0             | 1         | 1         |
| Lbh_j1        | 4.46746   | 3.55327    | 0             | 1         | 1         |
| Lbh           | 19.2312   | 27.1678    | 0             | 1         | 1         |
| Lclat1        | 3.22528   | 2.33617    | 0             | 1         | 1         |
| Lclat1        | 0.3868    | 0.319547   | 0             | 1         | 1         |
| Ehd3          | 34.7284   | 32.5876    | 0             | 1         | 1         |
| Ehd3_j3       | 0.0517098 | 0          | 0             | 1         | 1         |
| Spast_j1      | 0.160871  | 0.142171   | -0.178276     | 0.745785  | 0.911427  |
| Spast         | 1.39644   | 1.34981    | -0.0489993    | 0.816419  | 0.940246  |
| Slc30a6       | 2.98526   | 3.19641    | 0.0986        | 0.502868  | 0.786856  |
| Slc30a6_j1    | 0.886186  | 0.83452    | -0.0866636    | 0.881342  | 0.962331  |
| Yipf4         | 20.2061   | 19.0182    | 0             | 1         | 1         |
| Birc6_j1      | 0.397983  | 0.262929   | -0.598034     | 0.0208357 | 0.145064  |
| Ttc27_j1      | 3.65519   | 3.41149    | 0             | 1         | 1         |
| Ttc27         | 2.88556   | 2.70718    | 0             | 1         | 1         |
| Ltbp1_j6      | 0.0578938 | 0.0387484  | 0             | 1         | 1         |
| Ltbp1_j7      | 0.218097  | 0.376347   | 0             | 1         | 1         |
| Rasgrp3       | 0.351656  | 0.267301   | -0.395702     | 0.292148  | 0.638961  |
| Crim1         | 1.45033   | 1.03532    | -0.486309     | 0.0197587 | 0.139688  |
| Crim1_j1      | 0.790412  | 0.241682   | -1.70949      | 1.07E-05  | 0.000328  |
| Crim1_j4      | 0.615186  | 0.00222691 | -8.10984      | 0.0342619 | 0.202837  |
| Crim1_j6      | 0.256193  | 0.433076   | 0.757386      | 0.0544198 | 0.272093  |
| Gm10093       | 7.21696   | 7.56774    | 0.0684715     | 0.615794  | 0.848521  |
| Vit           | 0.753594  | 1.0506     | 0.479359      | 0.0774293 | 0.33682   |
| Vit_j2        | 0.811243  | 0.710259   | -0.191789     | 0.569629  | 0.825926  |
| Ccdc75        | 8.16232   | 7.72962    | -0.0785814    | 0.466144  | 0.765927  |
| 1110001A16Rik | 2.04052   | 1.94695    | -0.0677172    | 0.637723  | 0.859772  |
| 2410091C18Rik | 15.3289   | 14.3404    | -0.0961653    | 0.422136  | 0.738238  |
| Qpct          | 0.187385  | 0.288347   | 0.621801      | 0.454388  | 0.758621  |
| Qpct          | 1.91529   | 2.58058    | 0.430131      | 0.0355849 | 0.207851  |
| Fam82a1_j1    | 1.45782   | 0.202163   | -2.85023      | 5.52E-11  | 5.90E-09  |
| Fam82a1       | 0         | 0.604837   | 1.79769e+308  | 4.39E-06  | 0.0001508 |
| Galm          | 6.5298    | 3.10657    | -1.07172      | 6.13E-10  | 5.32E-08  |
| Gemin6        | 2.08161   | 1.82602    | -0.189        | 0.475365  | 0.771313  |
| Arhgef33_j2   | 0.0906348 | 0          | -1.79769e+308 | 0.0702249 | 1         |
| Tmem178       | 1.34086   | 0.752802   | -0.832816     | 0.0081066 | 0.0733293 |

|                |           |                 |            |           |           |
|----------------|-----------|-----------------|------------|-----------|-----------|
| Pkdcc          | 3.78587   | 4.86275         | 0.361147   | 0.0220316 | 0.150677  |
| Eml4_j7        | 0.103366  | 0.0658375       | 0          | 1         | 1         |
| XLOC_014190    | 0.13194   | 0.0882855       | 0          | 1         | 1         |
| Mta3_j7        | 3.2729    | 2.59284         | 0          | 1         | 1         |
| Mta3_j9        | 6.68911   | 4.64358         | 0          | 1         | 1         |
| Mta3_j6        | 6.56243   | 5.87071         | 0          | 1         | 1         |
| Plekhh2_j2     | 0.0940577 | 0.14052         | 0.579161   | 0.403186  | 1         |
| Plekhh2_j6     | 0.0563264 | 0 -1.79769e+308 |            | 0.0147723 | 1         |
| Dync2li1       | 9.65616   | 9.53301         | -0.0185181 | 0.889338  | 0.964878  |
| Ppm1b_j1       | 0.639361  | 0.104782        | -2.60924   | 0.0008477 | 0.0125326 |
| Prkce_j4       | 0.0888055 | 0               | 0          | 1         | 1         |
| Epas1          | 22.4843   | 17.8336         | -0.334322  | 0.0002005 | 0.0038485 |
| Rhoq           | 5.92233   | 14.0312         | 1.2444     | 0         | 0         |
| Rhoq_j6        | 10.5451   | 13.4416         | 0.350128   | 0.0034895 | 0.0388507 |
| Socs5          | 2.53748   | 1.81067         | -0.486874  | 0.0065256 | 0.0623986 |
| Ttc7_j1        | 0.362289  | 0.202919        | -0.836241  | 0.0863502 | 0.359     |
| XLOC_014206    | 0.0533237 | 0 -1.79769e+308 |            | 0.0555658 | 1         |
| Msh2           | 13.0158   | 11.4501         | -0.184913  | 0.0821574 | 0.349173  |
| Msh6           | 4.46973   | 4.53547         | 0          | 1         | 1         |
| Foxn2          | 0.633397  | 0.220277        | -1.52379   | 0.0002384 | 0.004434  |
| Foxn2_j3       | 0.136646  | 0.144853        | 0.0841396  | 0.884588  | 1         |
| Klraq1         | 13.198    | 12.5515         | -0.0724574 | 0.494393  | 0.782504  |
| Ston1_j1       | 1.50041   | 1.04698         | 0          | 1         | 1         |
| Ston1          | 0.766226  | 0.859263        | 0          | 1         | 1         |
| Ston1_j4       | 0.0707711 | 0               | 0          | 1         | 1         |
| Adcyap1        | 6.06055   | 10.7592         | 0          | 1         | 1         |
| Gm10232        | 31.4782   | 36.0343         | 0.195017   | 0.0795117 | 0.342454  |
| Pisd-ps2_j12   | 0.920066  | 1.29514         | 0.493302   | 0.123401  | 0.437384  |
| Pisd-ps2_j10   | 1.26881   | 3.63635         | 1.51901    | 4.23E-11  | 4.64E-09  |
| AK138253_j1    | 3.6153    | 4.0533          | 0          | 1         | 1         |
| Tfb1m          | 1.44967   | 1.39325         | 0          | 1         | 1         |
| 5730437N04Rik  | 31.0163   | 30.7507         | -0.0124096 | 0.915072  | 0.973508  |
| Serac1_j1      | 0.0981195 | 0.160386        | 0          | 1         | 1         |
| Serac1_j2      | 0.193178  | 0.106792        | 0          | 1         | 1         |
| Tmem181b_j1    | 2.52489   | 2.74115         | 0          | 1         | 1         |
| Tmem181b_j2    | 0.0697148 | 0               | 0          | 1         | 1         |
| BC049966_j5    | 0.0636537 | 0               | 0          | 1         | 1         |
| BC049966_j4    | 0.134284  | 0               | 0          | 1         | 1         |
| Tmem181c-ps_j3 | 0.792948  | 0.595441        | -0.413269  | 0.417203  | 0.734301  |
| AK178082_j1    | 2.04055   | 2.29477         | 0.169386   | 0.660097  | 0.871049  |
| Dynlt1e_j1     | 0.568229  | 0.469447        | -0.275512  | 0.630675  | 0.856399  |
| Ezr            | 2.85125   | 3.21116         | 0          | 1         | 1         |
| Rsph3b         | 5.44499   | 7.88058         | 0.533373   | 0.0002824 | 0.0050832 |
| Tagap1_j1      | 6.17485   | 5.75496         | 0          | 1         | 1         |
| Tagap1         | 5.39919   | 7.10863         | 0          | 1         | 1         |
| Fndc1_j1       | 0.116496  | 0 -1.79769e+308 |            | 0.0005891 | 1         |
| Gm1604b_j1     | 0.837487  | 0.53914         | -0.635407  | 0.0110561 | 0.0923154 |



|             |           |            |               |           |           |
|-------------|-----------|------------|---------------|-----------|-----------|
| Rnaset2a_j1 | 0.5345    | 0.530082   | -0.0119758    | 0.972304  | 0.991962  |
| AK015714_j1 | 0.254211  | 0.244359   | -0.0570227    | 0.859121  | 0.955489  |
| Qk          | 0         | 0.0890729  | 0             | 1         | 1         |
| Qk_j4       | 0.5285    | 0          | 0             | 1         | 1         |
| Qk          | 3.2657    | 2.76681    | 0             | 1         | 1         |
| Pacrg       | 1.32891   | 0.855374   | -0.635618     | 0.0928913 | 0.374897  |
| Map3k4      | 2.98659   | 2.72841    | 0             | 1         | 1         |
| Slc22a3_j3  | 0.140106  | 0.144066   | 0.0402152     | 1         | 1         |
| Igf2r_j3    | 5.4542    | 7.13394    | 0             | 1         | 1         |
| Igf2r_j4    | 2.20904   | 2.2345     | 0             | 1         | 1         |
| Igf2r       | 0.178275  | 0.249985   | 0             | 1         | 1         |
| Pnlcd1_j5   | 0.213257  | 0.121201   | -0.815197     | 0.392773  | 0.718933  |
| Acat2_j1    | 65.1713   | 75.4317    | 0.210936      | 0.0171077 | 0.126328  |
| Wtap_j4     | 0.831353  | 0.954581   | 0             | 1         | 1         |
| Wtap_j8     | 0.352173  | 0.168326   | 0             | 1         | 1         |
| Tcte2_j3    | 0         | 0.231857   | 1.79769e+308  | 0.0072383 | 0.0675736 |
| Gm16052_j2  | 0.0572323 | 0          | -1.79769e+308 | 0.0087897 | 1         |
| Gm16052_j1  | 0.118629  | 0          | -1.79769e+308 | 0.0002205 | 1         |
| Gm16052     | 0.779567  | 0.661469   | -0.237        | 0.354496  | 0.690637  |
| Dact2       | 0.887884  | 0.522881   | -0.763888     | 0.0235072 | 0.157319  |
| Dact2_j1    | 0.67095   | 0.35095    | -0.934939     | 0.0287051 | 0.180324  |
| Thbs2       | 0.599291  | 0.308659   | -0.957243     | 0.0025145 | 0.0299872 |
| Wdr27_j7    | 0.23303   | 0.127864   | -0.865907     | 0.584797  | 0.833647  |
| Wdr27_j8    | 0.0752877 | 0          | -1.79769e+308 | 0.0937938 | 1         |
| AK004434_j2 | 0.500422  | 0.735523   | 0             | 1         | 1         |
| Phf10_j4    | 1.16769   | 0.96034    | 0             | 1         | 1         |
| Phf10_j5    | 0.549859  | 0.00366504 | 0             | 1         | 1         |
| Psemb1      | 153.977   | 158.18     | 0.038857      | 0.663311  | 0.872496  |
| Prdm9_j2    | 0.151064  | 0.127537   | -0.244247     | 0.768445  | 0.921133  |
| Prdm9_j3    | 0.225601  | 0          | -1.79769e+308 | 5.08E-07  | 2.28E-05  |
| Prdm9_j8    | 0.117253  | 0.0436592  | -1.42527      | 0.204521  | 1         |
| XLOC_014270 | 0.181213  | 0.212041   | 0.226661      | 0.591931  | 0.837449  |
| Rgmb_j3     | 22.473    | 36.0058    | 0             | 1         | 1         |
| Rgmb        | 17.5339   | 17.8847    | 0             | 1         | 1         |
| XLOC_014286 | 4.98847   | 4.14929    | -0.265731     | 0.0543627 | 0.271922  |
| Zfp945      | 0.655062  | 0.640877   | 0             | 1         | 1         |
| Zfp40_j1    | 1.62234   | 1.52468    | 0             | 1         | 1         |
| Zfp40       | 2.31374   | 2.29339    | 0             | 1         | 1         |
| Zfp213      | 1.11744   | 1.24068    | 0.150929      | 0.488156  | 0.778688  |
| Zfp13       | 0.320151  | 0.24343    | -0.395246     | 0.248432  | 0.595763  |
| Zfp13_j4    | 2.38369   | 1.6322     | -0.546377     | 0.130041  | 0.449086  |
| Mmp25_j2    | 9.43838   | 11.5897    | 0             | 1         | 1         |
| Mmp25_j1    | 7.94088   | 8.63151    | 0             | 1         | 1         |
| Mmp25       | 4.22965   | 5.15205    | 0             | 1         | 1         |
| Thoc6_j5    | 0.0238628 | 0.112632   | 2.23878       | 0.0399472 | 1         |
| AK047830_j1 | 0.072003  | 0.0130927  | -2.45929      | 0.504971  | 1         |
| Paqr4       | 1.52238   | 1.66899    | 0             | 1         | 1         |

|               |           |           |               |           |           |
|---------------|-----------|-----------|---------------|-----------|-----------|
| Paqr4_j1      | 25.925    | 25.6364   | 0             | 1         | 1         |
| Flywch1_j3    | 12.6866   | 10.8054   | 0             | 1         | 1         |
| Flywch1_j1    | 12.5498   | 10.1721   | 0             | 1         | 1         |
| Flywch2       | 10.8113   | 11.0719   | 0             | 1         | 1         |
| Tceb2         | 18.2405   | 14.969    | 0             | 1         | 1         |
| Pdpk1_j2      | 0.0648761 | 0.0188027 | 0             | 1         | 1         |
| Atp6v0c       | 2.22267   | 3.56528   | 0.681721      | 0.0389328 | 0.220034  |
| Tbc1d24_j4    | 0.204564  | 0.0752666 | -1.44247      | 0.0063274 | 0.061076  |
| Tbc1d24_j15   | 0.304967  | 0.351577  | 0.205186      | 0.437978  | 0.747865  |
| 1600002H07Rik | 0.649603  | 0.621174  | -0.0645595    | 0.839473  | 0.949022  |
| Ccnf          | 0.413065  | 0.398785  | -0.0507557    | 0.878746  | 0.961284  |
| Abca17_j1     | 0.123106  | 0.0448731 | -1.45598      | 0.248482  | 1         |
| E4f1_j7       | 0.183749  | 0.229727  | 0.322182      | 0.386798  | 0.714789  |
| Mlst8         | 4.20524   | 4.70446   | 0             | 1         | 1         |
| Mlst8         | 7.40541   | 6.18568   | 0             | 1         | 1         |
| Traf7_j2      | 1.07749   | 1.53032   | 0             | 1         | 1         |
| Traf7_j3      | 0.528461  | 0.784455  | 0             | 1         | 1         |
| Tsc2_j2       | 1.80203   | 1.00441   | 0             | 1         | 1         |
| Slc9a3r2_j1   | 0.208788  | 0         | 0             | 1         | 1         |
| Slc9a3r2      | 23.3633   | 19.1209   | 0             | 1         | 1         |
| Slc9a3r2_j2   | 6.04658   | 1.84672   | 0             | 1         | 1         |
| Syngn3        | 85.4047   | 92.8033   | 0.119861      | 0.166926  | 0.503257  |
| Gfer          | 5.85634   | 5.83255   | 0             | 1         | 1         |
| Tbl3_j2       | 1.43163   | 1.41789   | 0             | 1         | 1         |
| Ndufb10       | 37.732    | 37.6187   | -0.00433685   | 0.961396  | 0.989061  |
| Mapk8ip3_j4   | 43.8938   | 52.3158   | 0             | 1         | 1         |
| Mapk8ip3_j5   | 0.132364  | 0.0533314 | 0             | 1         | 1         |
| Hn1l          | 3.41887   | 3.35248   | -0.0282916    | 0.84883   | 0.952178  |
| Tmem204       | 1.49542   | 1.623     | 0             | 1         | 1         |
| Telo2_j1      | 0.16542   | 0.0403276 | 0             | 1         | 1         |
| Gnptg_j3      | 3.96384   | 6.0283    | 0             | 1         | 1         |
| Gnptg_j2      | 10.8073   | 11.8551   | 0             | 1         | 1         |
| Ube2i_j5      | 0.160604  | 0.135407  | -0.246204     | 0.642308  | 0.862006  |
| Cacna1h_j6    | 3.21198   | 3.02235   | 0             | 1         | 1         |
| Cacna1h_j7    | 1.37439   | 1.1777    | 0             | 1         | 1         |
| Sox8_j2       | 0.0608873 | 0         | -1.79769e+308 | 0.0170817 | 1         |
| Sox8          | 0.830588  | 1.04468   | 0.33085       | 0.207959  | 0.552233  |
| Chtf18        | 0.22109   | 0.140786  | -0.651129     | 0.284442  | 0.633101  |
| Haghl         | 0.118312  | 0.0695245 | -0.767004     | 0.337965  | 1         |
| Fam173a_j3    | 14.1277   | 13.8664   | -0.0269336    | 0.894973  | 0.966853  |
| Fam173a_j4    | 0         | 0.338565  | 1.79769e+308  | 1.25E-05  | 0.0003755 |
| Stub1_j1      | 68.8082   | 77.0819   | 0.163813      | 0.13745   | 0.461154  |
| Stub1_j2      | 41.3236   | 46.9906   | 0.185407      | 0.0623111 | 0.295567  |
| Rhot2_j1      | 1.84086   | 2.35599   | 0.355951      | 0.0259364 | 0.168717  |
| Rhot2_j5      | 1.01032   | 0         | -1.79769e+308 | 1.75E-25  | 5.53E-23  |
| Rhot2_j6      | 6.21      | 6.67175   | 0.103473      | 0.374971  | 0.707307  |
| Wdr90_j2      | 0.052196  | 0.0667791 | 0.355458      | 0.729127  | 1         |

|               |           |            |               |           |           |
|---------------|-----------|------------|---------------|-----------|-----------|
| Wdr90_j4      | 0.0173881 | 0.0477187  | 1.45645       | 0.161914  | 1         |
| Fam195a_j1    | 0.180656  | 0.369022   | 1.03047       | 0.230511  | 0.577519  |
| Fam195a       | 2.09686   | 1.63948    | -0.354987     | 0.273738  | 0.62288   |
| Wfikkn1       | 0.167006  | 0.0136437  | 0             | 1         | 1         |
| Rab40c        | 1.25649   | 1.42377    | 0             | 1         | 1         |
| Pigq_j1       | 4.27771   | 3.06971    | 0             | 1         | 1         |
| Pigq          | 19.3256   | 18.5132    | 0             | 1         | 1         |
| Rab11fip3_j1  | 0.33251   | 0.327432   | 0             | 1         | 1         |
| Rab11fip3     | 10.013    | 9.23497    | 0             | 1         | 1         |
| Decr2         | 0.417898  | 0.397656   | -0.0716283    | 0.865247  | 0.957045  |
| Decr2_j1      | 7.55121   | 8.08348    | 0.0982695     | 0.504138  | 0.787468  |
| Itfg3_j7      | 0.263354  | 0.00108266 | 0             | 1         | 1         |
| Itfg3_j6      | 1.38567   | 2.11437    | 0             | 1         | 1         |
| Itfg3         | 3.21687   | 3.24204    | 0             | 1         | 1         |
| Itfg3_j8      | 0.318343  | 0.2365     | 0             | 1         | 1         |
| Dusp1         | 4.24423   | 5.54062    | 0.384544      | 0.0129038 | 0.103541  |
| Cuta          | 7.72479   | 10.2611    | 0             | 1         | 1         |
| Cuta          | 4.86861   | 3.68603    | 0             | 1         | 1         |
| Bak1_j1       | 3.4767    | 3.71525    | 0.0957414     | 0.653113  | 0.867323  |
| Bak1          | 0         | 0.073905   | 1.79769e+308  | 0.0299799 | 1         |
| Bak1          | 0.148277  | 0.0264921  | -2.48466      | 0.0408268 | 0.226899  |
| Lemd2         | 3.88713   | 3.99368    | 0             | 1         | 1         |
| AK038843      | 0.15238   | 0.0815629  | -0.901687     | 0.311695  | 0.656264  |
| Grm4          | 5.55655   | 3.65507    | 0             | 1         | 1         |
| Al413582      | 32.0392   | 29.9684    | -0.0963951    | 0.302391  | 0.648414  |
| Nudt3_j3      | 2.00924   | 0          | 0             | 1         | 1         |
| Nudt3_j2      | 67.0815   | 57.0281    | 0             | 1         | 1         |
| Nudt3_j4      | 20.0224   | 33.9679    | 0             | 1         | 1         |
| Nudt3_j5      | 15.1521   | 11.6579    | 0             | 1         | 1         |
| Nudt3         | 1.23402   | 2.16866    | 0             | 1         | 1         |
| Spdef_j1      | 0.107145  | 0.165379   | 0             | 1         | 1         |
| D17Wsu92e     | 5.22433   | 3.58433    | 0             | 1         | 1         |
| D17Wsu92e     | 25.4225   | 26.4596    | 0             | 1         | 1         |
| Taf11_j2      | 2.15757   | 2.68174    | 0             | 1         | 1         |
| 4930526A20Rik | 1.30632   | 1.147      | -0.187647     | 0.611108  | 0.846733  |
| Fkbp5_j4      | 0.666807  | 1.18493    | 0.829465      | 0.0100196 | 0.0856751 |
| Fkbp5_j3      | 0.146205  | 0          | -1.79769e+308 | 0.0001881 | 0.0036463 |
| Fkbp5         | 9.48271   | 9.41454    | -0.010409     | 0.925787  | 0.976962  |
| Srpk1         | 11.5845   | 13.7562    | 0.247887      | 0.0100014 | 0.0855854 |
| Srpk1_j1      | 3.3668    | 4.0548     | 0.268251      | 0.201185  | 0.544548  |
| XLOC_014361   | 0.0926655 | 0          | -1.79769e+308 | 0.0661631 | 1         |
| Slc26a8_j13   | 0.0706893 | 0.0399177  | -0.824463     | 0.591517  | 1         |
| Slc26a8_j18   | 0.125389  | 0.00411271 | -4.93018      | 0.214106  | 1         |
| Stk38_j7      | 2.22735   | 2.83721    | 0             | 1         | 1         |
| Stk38_j3      | 1.67431   | 1.29202    | 0             | 1         | 1         |
| Stk38         | 1.50193   | 1.33427    | 0             | 1         | 1         |
| LOC100499420  | 0.131007  | 0.138571   | 0.0809824     | 0.901392  | 1         |

|                  |           |                 |            |           |           |
|------------------|-----------|-----------------|------------|-----------|-----------|
| Cpne5            | 0.436532  | 0.198128        | 0          | 1         | 1         |
| Ppil1            | 11.0374   | 12.2235         | 0.14726    | 0.250235  | 0.59787   |
| Mtch1_j6         | 40.4358   | 61.1094         | 0          | 1         | 1         |
| Mtch1            | 32.8032   | 11.1868         | 0          | 1         | 1         |
| 1110021J02Rik_j1 | 1.14491   | 1.09815         | -0.0601576 | 0.713051  | 0.896204  |
| Mdga1_j4         | 0.380692  | 0.0113921       | 0          | 1         | 1         |
| Mdga1_j6         | 0.419748  | 0.462902        | 0          | 1         | 1         |
| Mdga1_j2         | 1.55362   | 2.27337         | 0          | 1         | 1         |
| Btbd9_j2         | 0.288766  | 0               | 0          | 1         | 1         |
| Btbd9            | 0.679927  | 0.529705        | 0          | 1         | 1         |
| Glo1_j5          | 0.0986679 | 0 -1.79769e+308 |            | 0.13588   | 1         |
| Cbs_j2           | 0.125399  | 0.0745764       | -0.74974   | 0.396185  | 1         |
| U2af1_j1         | 0.128863  | 0.232327        | 0.850318   | 0.182636  | 0.523127  |
| U2af1_j3         | 0.0514476 | 0.0274855       | -0.904435  | 0.614498  | 1         |
| Sik1             | 1.64172   | 1.7044          | 0.0540619  | 0.747154  | 0.911904  |
| Hsf2bp_j1        | 0.0489722 | 0 -1.79769e+308 |            | 0.0934572 | 1         |
| Notch3_j11       | 0.0701246 | 0 -1.79769e+308 |            | 0.0012285 | 1         |
| Notch3           | 0.663836  | 0.437961        | -0.600025  | 0.0195293 | 0.138663  |
| Brd4_j7          | 1.39735   | 2.34319         | 0.745785   | 3.17E-05  | 0.0008106 |
| Akap8l_j10       | 1.31785   | 1.12982         | -0.222097  | 0.289118  | 0.636737  |
| Wiz_j2           | 2.02501   | 1.60776         | -0.332873  | 0.102215  | 0.396217  |
| Rasal3_j4        | 0.0188629 | 0.0770639       | 2.0305     | 0.20135   | 1         |
| Rasal3_j3        | 0.0568325 | 0 -1.79769e+308 |            | 0.0204526 | 1         |
| Rasal3_j9        | 0.0911056 | 0 -1.79769e+308 |            | 0.0270412 | 1         |
| Zfp871_j2        | 7.13625   | 6.16152         | 0          | 1         | 1         |
| Zfp811_j1        | 0.353511  | 0.346745        | -0.0278792 | 0.954411  | 0.986881  |
| Zfp811_j2        | 0.142484  | 0.209634        | 0.557077   | 0.386834  | 0.714802  |
| Zfp799           | 1.51435   | 1.3468          | -0.169158  | 0.220207  | 0.56698   |
| XLOC_014389      | 0.133681  | 0.0793089       | -0.753241  | 0.369317  | 1         |
| Zfp870_j3        | 0.522489  | 0.183064        | -1.51305   | 0.0003431 | 0.005955  |
| Zfp870           | 0.314527  | 0.529461        | 0.751339   | 0.0108262 | 0.090747  |
| Cyp4f14_j1       | 1.46411   | 1.15596         | -0.340926  | 0.0516642 | 0.263562  |
| Cyp4f13_j4       | 0.583718  | 0.506988        | -0.203321  | 0.651645  | 0.866342  |
| Zfp763           | 3.42931   | 2.82163         | -0.281389  | 0.0521832 | 0.265182  |
| Morc2b_j1        | 0.198168  | 0.109862        | -0.851033  | 0.300973  | 0.647323  |
| Zfp955a          | 2.16778   | 1.80242         | -0.26628   | 0.134252  | 0.456007  |
| Zfp81_j1         | 0.656378  | 0.730769        | 0          | 1         | 1         |
| Zfp81_j2         | 0.172578  | 0.0647399       | 0          | 1         | 1         |
| Zfp81            | 0.762636  | 0.425577        | 0          | 1         | 1         |
| Zfp101_j3        | 0.384218  | 0 -1.79769e+308 |            | 1.44E-07  | 7.41E-06  |
| Zfp101           | 0.825792  | 0.611351        | -0.433777  | 0.217102  | 0.563245  |
| Hnrnpj5          | 10.4162   | 11.4934         | 0          | 1         | 1         |
| Hnrnpj6          | 16.9951   | 18.3119         | 0          | 1         | 1         |
| March2           | 43.8254   | 50.8728         | 0          | 1         | 1         |
| Angptl4          | 5.74166   | 6.43192         | 0.16378    | 0.262734  | 0.611657  |
| Kifc1            | 0.221145  | 0.102853        | -1.10441   | 0.124594  | 0.439858  |
| AK136742_j2      | 0.389212  | 0.622357        | 0.677187   | 0.194385  | 0.536757  |

|               |           |                 |            |           |           |
|---------------|-----------|-----------------|------------|-----------|-----------|
| AK136742      | 0.528156  | 0.445235        | -0.246397  | 0.60987   | 0.846292  |
| H2-Ke2        | 17.0097   | 17.8884         | 0.0726698  | 0.520531  | 0.79793   |
| B3galt4       | 2.16651   | 2.04129         | -0.0858866 | 0.670751  | 0.875476  |
| H2-K1         | 2.43023   | 0.557173        | -2.12489   | 3.91E-07  | 1.79E-05  |
| Ring1         | 1.55859   | 2.43349         | 0          | 1         | 1         |
| Ring1_j1      | 2.7897    | 2.51134         | 0          | 1         | 1         |
| Brd2_j2       | 29.9032   | 31.9459         | 0          | 1         | 1         |
| Brd2          | 1.69455   | 3.74672         | 0          | 1         | 1         |
| H2-Aa         | 22.7859   | 39.0975         | 0.778939   | 8.10E-14  | 1.36E-11  |
| Btnl5_j3      | 0.0664291 | 0.131197        | 0.981848   | 0.41206   | 1         |
| Rnf5          | 32.3894   | 32.7039         | 0.0139401  | 0.894972  | 0.966853  |
| Rnf5_j1       | 0.358117  | 0.247756        | -0.531513  | 0.464593  | 0.764862  |
| Egfl8_j2      | 0.13403   | 0.106522        | -0.3314    | 0.460675  | 1         |
| Ppt2_j1       | 13.4529   | 14.5921         | 0.117267   | 0.327993  | 0.670534  |
| Ppt2_j3       | 0.439661  | 0.560012        | 0.349066   | 0.184898  | 0.525175  |
| C4b_j4        | 0.335142  | 0.160525        | 0          | 1         | 1         |
| C4b_j5        | 0.0637014 | 0               | 0          | 1         | 1         |
| Skiv2l_j1     | 3.08751   | 4.54991         | 0          | 1         | 1         |
| Skiv2l_j2     | 0.478465  | 0.233157        | 0          | 1         | 1         |
| Skiv2l        | 2.94068   | 3.68949         | 0          | 1         | 1         |
| C2_j1         | 0.332145  | 0 -1.79769e+308 | 0.0001347  | 0.0027471 |           |
| C2            | 0.779745  | 1.07709         | 0.466064   | 0.0742195 | 0.328448  |
| 1110038B12Rik | 6.14022   | 10.4381         | 0.765497   | 1.21E-05  | 0.0003638 |
| Ly6g6d_j2     | 0.15074   | 0.391904        | 1.37844    | 0.0867971 | 0.360114  |
| Csnk2b        | 53.5609   | 54.1273         | 0.0151741  | 0.882467  | 0.962629  |
| Prrc2a_j6     | 11.8822   | 14.1785         | 0          | 1         | 1         |
| Prrc2a        | 23.3145   | 22.2459         | 0          | 1         | 1         |
| Aif1_j1       | 0.433595  | 0.755307        | 0.800713   | 0.0104754 | 0.0884516 |
| Nfkbil1_j2    | 2.9418    | 3.23758         | 0.138215   | 0.41265   | 0.731647  |
| Nfkbil1_j1    | 0.776355  | 0.370849        | -1.06588   | 0.0052717 | 0.0527159 |
| Tcf19         | 3.80219   | 4.7897          | 0.333105   | 0.0567433 | 0.278678  |
| Tcf19         | 0.845988  | 0.868768        | 0.0383335  | 0.913476  | 0.972839  |
| Vars2_j1      | 4.62564   | 3.75031         | -0.302642  | 0.011325  | 0.094013  |
| Ddr1_j3       | 4.96718   | 6.38438         | 0          | 1         | 1         |
| Ddr1          | 5.80837   | 5.38912         | 0          | 1         | 1         |
| Ddr1_j4       | 0.231299  | 0.377015        | 0          | 1         | 1         |
| Tubb5_j2      | 143.936   | 298.277         | 0          | 1         | 1         |
| Tubb5         | 599.168   | 697.189         | 0          | 1         | 1         |
| Atat1_j1      | 0.473881  | 0.501136        | 0          | 1         | 1         |
| Mrps18b_j1    | 0         | 0.0704942       | 0          | 1         | 1         |
| Abcf1         | 21.2108   | 24.6652         | 0.217675   | 0.0196555 | 0.139199  |
| Prr3_j2       | 0.220435  | 0.126627        | 0          | 1         | 1         |
| H2-T23_j1     | 0.546009  | 0.800708        | 0          | 1         | 1         |
| H2-T9_j1      | 0.253285  | 0.347959        | 0          | 1         | 1         |
| H2-T10_j2     | 0.445056  | 0.500046        | 0          | 1         | 1         |
| H2-T10_j3     | 0.423471  | 0.378397        | 0          | 1         | 1         |
| H2-T10_j4     | 0.0159768 | 0.067166        | 0          | 1         | 1         |

|               |            |             |              |           |           |
|---------------|------------|-------------|--------------|-----------|-----------|
| Trim39_j3     | 2.15561    | 2.3136      | 0            | 1         | 1         |
| H2-M10.2_j1   | 0.258462   | 0.21711     | 0            | 1         | 1         |
| H2-M1_j4      | 0.097793   | 0.0852256   | -0.198444    | 0.851409  | 1         |
| Trim15_j1     | 0.0813334  | 0.000523205 | -7.28033     | 0.274699  | 1         |
| Trim15        | 0.280478   | 0.494426    | 0.817868     | 0.0002857 | 0.0051337 |
| Ppp1r11_j2    | 16.4338    | 4.75467     | 0            | 1         | 1         |
| Znrd1         | 0.18575    | 0.233835    | 0.332128     | 0.599746  | 0.841292  |
| Crisp1        | 0.613896   | 0.233736    | -1.39311     | 0.0141598 | 0.110364  |
| 9130008F23Rik | 0.17489    | 0.112579    | -0.635503    | 0.430028  | 0.743005  |
| Cenpq         | 1.40607    | 1.18847     | 0            | 1         | 1         |
| Cd2ap_j2      | 5.31307    | 4.86687     | -0.126551    | 0.339835  | 0.68005   |
| Cd2ap         | 1.60021    | 1.00134     | -0.676337    | 0.0023703 | 0.0286103 |
| Mep1a_j1      | 0.170258   | 0.192881    | 0.179987     | 0.774897  | 0.923746  |
| XLOC_014477   | 0.221637   | 0.021518    | -3.36458     | 0.173603  | 0.51148   |
| Enpp4         | 1.89948    | 1.58037     | 0            | 1         | 1         |
| Enpp4         | 3.7079     | 3.20788     | 0            | 1         | 1         |
| Cdc5l_j7      | 0.0899709  | 0.240655    | 1.41943      | 0.0800645 | 0.343953  |
| Spats1        | 0          | 0.240309    | 1.79769e+308 | 2.01E-05  | 0.0005568 |
| Spats1_j5     | 0.319422   | 0.355548    | 0.154578     | 0.671998  | 0.876138  |
| Spats1_j6     | 0.168874   | 0.0140872   | -3.5835      | 0.0229139 | 0.154757  |
| Tmem151b_j1   | 1.89413    | 1.44945     | 0            | 1         | 1         |
| Hsp90ab1_j1   | 459.985    | 561.247     | 0            | 1         | 1         |
| Hsp90ab1      | 422.187    | 421.129     | 0            | 1         | 1         |
| Slc29a1_j5    | 1.84934    | 4.67268     | 1.33724      | 1.57E-06  | 6.10E-05  |
| Slc29a1_j3    | 5.83897    | 5.09106     | -0.197749    | 0.246898  | 0.594423  |
| Slc29a1       | 4.85611    | 1.91387     | -1.34331     | 6.03E-08  | 3.48E-06  |
| Slc29a1_j6    | 0.00436838 | 0.449778    | 6.68597      | 0.0471928 | 0.249339  |
| Gm7325        | 0.121363   | 0.263006    | 1.11576      | 0.271398  | 0.620302  |
| Capn11_j2     | 0.1927     | 0.0880223   | -1.13042     | 0.302871  | 0.648644  |
| Capn11_j5     | 0.513287   | 0.101744    | -2.33482     | 1.83E-05  | 0.0005168 |
| Tmem63b_j3    | 13.8052    | 13.5444     | 0            | 1         | 1         |
| Tmem63b_j2    | 1.72848    | 0.59784     | 0            | 1         | 1         |
| Vegfa         | 8.99214    | 9.18415     | 0            | 1         | 1         |
| Vegfa         | 6.90693    | 6.75514     | 0            | 1         | 1         |
| Rsph9         | 0.940858   | 0.903204    | -0.0589259   | 0.721541  | 0.900522  |
| Mad2l1bp      | 11.7438    | 12.6327     | 0            | 1         | 1         |
| Polh          | 1.298      | 1.27713     | 0            | 1         | 1         |
| Polr1c        | 3.17287    | 3.36595     | 0.0852237    | 0.478019  | 0.77269   |
| Tjap1_j5      | 0.519262   | 0.662232    | 0            | 1         | 1         |
| Tjap1         | 0.191316   | 0.363532    | 0            | 1         | 1         |
| Tjap1_j3      | 1.63696    | 1.65208     | 0            | 1         | 1         |
| Abcc10_j2     | 1.18841    | 1.32693     | 0.159058     | 0.612207  | 0.847331  |
| Abcc10_j1     | 0.250407   | 0.375218    | 0.583451     | 0.126471  | 0.442942  |
| Abcc10_j7     | 0.810283   | 0.82563     | 0.0270703    | 0.929936  | 0.978574  |
| Ttbk1_j2      | 0.260321   | 0.273876    | 0            | 1         | 1         |
| Cul9_j3       | 7.30968    | 6.52927     | 0            | 1         | 1         |
| Srf_j2        | 0.474217   | 0.414314    | -0.19482     | 0.535451  | 0.80631   |

|             |           |            |            |           |          |
|-------------|-----------|------------|------------|-----------|----------|
| Srf         | 1.79937   | 1.79518    | -0.0033587 | 0.983477  | 0.995138 |
| Ptk7        | 8.48078   | 5.31331    | 0          | 1         | 1        |
| Klc4_j1     | 1.70229   | 2.55775    | 0          | 1         | 1        |
| Klc4        | 2.90836   | 2.68744    | 0          | 1         | 1        |
| Klc4_j2     | 5.86027   | 5.7193     | 0          | 1         | 1        |
| Klhdc3_j6   | 0.256857  | 0.346478   | 0.431797   | 0.353884  | 0.690079 |
| Ppp2r5d     | 24.3979   | 24.7827    | 0.0225729  | 0.80588   | 0.935848 |
| Cnpy3       | 18.0806   | 17.1559    | -0.0757447 | 0.486751  | 0.777771 |
| Rpl71       | 11.1033   | 11.6024    | 0.0634311  | 0.551649  | 0.815896 |
| BC032203_j4 | 0.0832639 | 0          | 0          | 1         | 1        |
| BC032203_j1 | 4.20421   | 2.92331    | 0          | 1         | 1        |
| Ubr2_j5     | 0.317958  | 1.30558    | 0          | 1         | 1        |
| Ubr2_j6     | 3.7074    | 4.85177    | 0          | 1         | 1        |
| Ubr2        | 2.5091    | 2.14218    | 0          | 1         | 1        |
| Ubr2        | 1.96465   | 1.76281    | 0          | 1         | 1        |
| Taf8        | 4.74812   | 4.95686    | 0.0620712  | 0.663555  | 0.872642 |
| Bysl        | 2.61669   | 2.67446    | 0.031508   | 0.795984  | 0.932016 |
| XLOC_014517 | 0.269829  | 0.205978   | -0.389555  | 0.31187   | 0.656405 |
| Prickle4_j4 | 0.160431  | 0.0452186  | -1.82696   | 0.170277  | 0.507195 |
| Mdfi_j2     | 0.22016   | 0.042044   | -2.38858   | 0.117852  | 0.427133 |
| Foxp4_j10   | 0.342118  | 0.102474   | 0          | 1         | 1        |
| Foxp4_j11   | 0.06196   | 0          | 0          | 1         | 1        |
| Foxp4       | 0.384239  | 0.219803   | 0          | 1         | 1        |
| Foxp4       | 0.242648  | 0.345642   | 0          | 1         | 1        |
| Nfya_j6     | 0.360845  | 0.470511   | 0          | 1         | 1        |
| Nfya_j5     | 0.0897683 | 0          | 0          | 1         | 1        |
| Nfya_j4     | 2.00027   | 2.11267    | 0          | 1         | 1        |
| Apobec2     | 0.253804  | 0.238979   | -0.0868261 | 0.730738  | 0.904795 |
| Daam2_j4    | 1.94794   | 1.49348    | 0          | 1         | 1        |
| Daam2_j5    | 0.208081  | 0.184463   | 0          | 1         | 1        |
| Daam2_j6    | 2.15926   | 1.35225    | 0          | 1         | 1        |
| Rftn1_j2    | 0.248234  | 0.38264    | 0.624291   | 0.311942  | 0.656418 |
| Rftn1       | 0.295705  | 0.470639   | 0.670465   | 0.0699561 | 0.317461 |
| Tbc1d5_j2   | 2.8998    | 3.43391    | 0          | 1         | 1        |
| Tbc1d5      | 0.492387  | 0          | 0          | 1         | 1        |
| Tbc1d5      | 4.11409   | 3.30694    | 0          | 1         | 1        |
| Satb1_j1    | 0.480333  | 0.00134241 | 0          | 1         | 1        |
| Satb1       | 1.3286    | 0.578213   | 0          | 1         | 1        |
| Satb1       | 0.187106  | 0.112926   | 0          | 1         | 1        |
| Satb1_j2    | 0.657434  | 0          | 0          | 1         | 1        |
| Kcnh8_j1    | 0.317458  | 0.302051   | -0.0717735 | 0.871785  | 0.959367 |
| Kcnh8       | 1.21153   | 0.954934   | -0.343354  | 0.159455  | 0.493951 |
| Mrps36-ps1  | 27.4994   | 27.9216    | 0.0219777  | 0.869336  | 0.958432 |
| Slc5a7_j2   | 0.0701478 | 1.94E-05   | -11.8189   | 0.964913  | 1        |
| Slc5a7      | 0.227993  | 0.187967   | -0.27851   | 0.531425  | 0.803508 |
| Pot1b       | 0.362407  | 0.169572   | -1.09571   | 0.0445972 | 0.241036 |
| Sh3gl1      | 7.46972   | 9.58183    | 0.359247   | 0.0057859 | 0.05688  |

|                  |           |                       |            |           |           |
|------------------|-----------|-----------------------|------------|-----------|-----------|
| Ubxn6_j1         | 23.7181   | 27.7116               | 0.224502   | 0.0448682 | 0.242097  |
| Ubxn6            | 15.4485   | 16.942                | 0.133141   | 0.20659   | 0.551189  |
| Lrg1             | 0.147968  | 0.226704              | 0.615524   | 0.38418   | 0.71322   |
| Sema6b           | 0.468587  | 0.234417              | -0.999239  | 0.0238283 | 0.158928  |
| D17Wsu104e       | 19.0247   | 21.6671               | 0.187632   | 0.106958  | 0.406359  |
| Dpp9_j2          | 9.99665   | 12.4288               | 0          | 1         | 1         |
| Ticam1           | 3.21121   | 3.88947               | 0.276456   | 0.0558157 | 0.276139  |
| Plin3_j1         | 1.39708   | 0.879578              | -0.667533  | 0.0570759 | 0.279916  |
| Plin3            | 7.62951   | 7.60762               | -0.0041437 | 0.974858  | 0.992797  |
| Ptprs_j6         | 0.418045  | 1.45955               | 0          | 1         | 1         |
| Ptprs_j7         | 0.141606  | 0                     | 0          | 1         | 1         |
| Safb2_j1         | 3.39465   | 3.49544               | 0          | 1         | 1         |
| 2410015M20Rik    | 7.5879    | 7.18994               | 0          | 1         | 1         |
| Lonp1            | 9.85599   | 10.2965               | 0          | 1         | 1         |
| Vmac             | 3.71591   | 4.2389                | 0.189975   | 0.221602  | 0.568818  |
| Nrtn             | 0.543304  | 0.448192              | -0.277642  | 0.50309   | 0.786906  |
| Rfx2_j4          | 0.279659  | 0.198502              | -0.494517  | 0.469349  | 0.76748   |
| Mllt1            | 5.169     | 5.74264               | 0.15183    | 0.181191  | 0.521104  |
| Gtf2f1           | 29.768    | 33.7245               | 0.180038   | 0.0564588 | 0.278053  |
| Khsrp_j4         | 1.71752   | 1.43553               | 0          | 1         | 1         |
| Slc25a23         | 4.68562   | 4.12264               | 0          | 1         | 1         |
| Dennd1c_j1       | 0.205566  | 0 -1.79769e+308       |            | 0.0033271 | 0.0373905 |
| Dennd1c_j2       | 0.105198  | 0.0508573             | -1.04858   | 0.590426  | 1         |
| Tubb4            | 305.497   | 335.773               | 0.136326   | 0.135102  | 0.457301  |
| Gm11110          | 0.138495  | 0.0673009             | -1.04113   | 0.382901  | 0.712805  |
| C3_j2            | 0         | 0.057307 1.79769e+308 |            | 0.0224577 | 1         |
| Gpr108           | 10.2278   | 9.75356               | 0          | 1         | 1         |
| Gpr108           | 7.58674   | 8.54228               | 0          | 1         | 1         |
| 2610034M16Rik_j1 | 0.434146  | 0.444226              | 0.0331134  | 0.942687  | 0.982647  |
| Nudt12           | 3.30884   | 2.66663               | -0.311311  | 0.0565357 | 0.278163  |
| Efna5_j1         | 2.38355   | 0                     | 0          | 1         | 1         |
| Efna5            | 1.77622   | 1.47002               | 0          | 1         | 1         |
| Fbxl17           | 2.10855   | 1.90025               | -0.150061  | 0.182089  | 0.522433  |
| Pja2             | 51.9694   | 44.8851               | 0          | 1         | 1         |
| Pja2             | 49.1121   | 40.1545               | 0          | 1         | 1         |
| Tmem232_j1       | 0.0741766 | 0.0632434             | -0.230049  | 0.851097  | 1         |
| Vapa_j4          | 53.6375   | 56.0717               | 0          | 1         | 1         |
| Vapa             | 12.2908   | 12.0987               | 0          | 1         | 1         |
| Rab31            | 1.40435   | 2.11033               | 0          | 1         | 1         |
| Ralbp1_j1        | 9.89525   | 13.2626               | 0          | 1         | 1         |
| Ralbp1_j2        | 0.207679  | 0                     | 0          | 1         | 1         |
| Twsg1            | 6.91354   | 7.2737                | 0.0732642  | 0.524482  | 0.800074  |
| Ankrd12_j2       | 0.666947  | 0.511687              | -0.382312  | 0.40694   | 0.727764  |
| Ndufv2           | 66.5152   | 66.193                | 0          | 1         | 1         |
| XLOC_014582      | 0.200547  | 0.0927715             | -1.11219   | 0.290113  | 0.637464  |
| Gm10495          | 15.8766   | 16.7156               | 0.0742905  | 0.685338  | 0.882587  |
| 1110012J17Rik_j4 | 0.146875  | 0.0535365             | -1.45599   | 0.105558  | 0.403524  |



|               |          |                 |            |           |           |
|---------------|----------|-----------------|------------|-----------|-----------|
| 1110012J17Rik | 2.99574  | 2.35872         | -0.344913  | 0.0057698 | 0.0567423 |
| Rab12         | 4.5835   | 5.23567         | 0.191924   | 0.268521  | 0.617467  |
| Rab12_j1      | 4.65012  | 4.02443         | -0.208482  | 0.244489  | 0.592045  |
| Ptprm_j1      | 1.26776  | 0.001193        | 0          | 1         | 1         |
| Arhgap28_j6   | 8.96412  | 8.75717         | 0          | 1         | 1         |
| Arhgap28_j1   | 7.16015  | 4.9847          | 0          | 1         | 1         |
| Arhgap28      | 4.76574  | 5.37402         | 0          | 1         | 1         |
| Tgif1         | 0.303621 | 0.424615        | 0.483886   | 0.327331  | 0.670248  |
| Tgif1         | 0.901793 | 1.852           | 1.03822    | 0.0006408 | 0.0099914 |
| Tgif1         | 1.29712  | 2.89631         | 1.1589     | 2.44E-05  | 0.000649  |
| Myl12b_j2     | 0.827072 | 1.65507         | 0          | 1         | 1         |
| Myl12b        | 120.121  | 144.888         | 0          | 1         | 1         |
| Smchd1_j2     | 1.76498  | 2.34935         | 0          | 1         | 1         |
| Smchd1_j3     | 1.44469  | 1.25721         | 0          | 1         | 1         |
| Smchd1        | 0.974042 | 0.91738         | 0          | 1         | 1         |
| Trmt61b       | 0.923773 | 0.978658        | 0.0832655  | 0.827861  | 0.944579  |
| Trmt61b       | 2.7553   | 2.97329         | 0.109855   | 0.584243  | 0.833357  |
| XLOC_014604   | 0.163141 | 0.0671109       | -1.2815    | 0.424844  | 0.740158  |
| Xdh           | 0.831327 | 2.45463         | 0          | 1         | 1         |
| Srd5a2        | 2.1699   | 3.1444          | 0.535154   | 0.0016405 | 0.0212827 |
| Memo1_j1      | 1.4889   | 1.51162         | 0          | 1         | 1         |
| Memo1_j2      | 0.235147 | 0               | 0          | 1         | 1         |
| Dpy30_j1      | 17.9669  | 18.2543         | 0.0228922  | 0.905718  | 0.970015  |
| Dpy30         | 10.0578  | 9.82051         | -0.0344395 | 0.874345  | 0.960101  |
| Dpy30         | 7.99089  | 8.52102         | 0.0926695  | 0.605001  | 0.844161  |
| Fam98a        | 24.9889  | 27.1106         | 0.117566   | 0.204744  | 0.549005  |
| Fez2          | 19.6907  | 20.2874         | 0          | 1         | 1         |
| Fez2_j1       | 8.98824  | 6.14208         | 0          | 1         | 1         |
| Fez2          | 6.36374  | 7.23815         | 0          | 1         | 1         |
| Strn          | 7.65617  | 6.30085         | -0.281076  | 0.0044693 | 0.0466987 |
| Heatr5b_j1    | 3.92621  | 4.65401         | 0          | 1         | 1         |
| Heatr5b       | 3.63822  | 2.27686         | 0          | 1         | 1         |
| Eif2ak2_j3    | 0.14447  | 0 -1.79769e+308 |            | 8.20E-08  | 4.51E-06  |
| Eif2ak2       | 1.32376  | 0.829242        | -0.674773  | 0.000641  | 0.0099914 |
| Cebpz         | 0.968318 | 1.05616         | 0.125274   | 0.56225   | 0.822079  |
| Prkd3         | 0.577341 | 0.196863        | 0          | 1         | 1         |
| Cdc42ep3      | 2.78756  | 2.89018         | 0.0521567  | 0.756604  | 0.916114  |
| Cyp1b1        | 0.353843 | 1.23294         | 1.80092    | 7.95E-14  | 1.34E-11  |
| Cyp1b1_j2     | 0.762518 | 1.56954         | 1.0415     | 3.28E-08  | 2.04E-06  |
| Cyp1b1_j1     | 7.18479  | 15.7496         | 1.1323     | 0         | 0         |
| Atl2_j2       | 8.42177  | 7.41716         | -0.183255  | 0.101703  | 0.395032  |
| Hnrpll        | 4.74585  | 4.36542         | -0.120545  | 0.333751  | 0.674644  |
| Srsf7         | 7.71916  | 7.02187         | 0          | 1         | 1         |
| Srsf7         | 14.0884  | 14.0132         | 0          | 1         | 1         |
| Dhx57_j5      | 8.21069  | 8.17576         | 0          | 1         | 1         |
| Dhx57_j4      | 6.18417  | 3.71491         | 0          | 1         | 1         |
| Dhx57         | 3.09514  | 2.71056         | 0          | 1         | 1         |

|                  |           |                 |            |           |           |
|------------------|-----------|-----------------|------------|-----------|-----------|
| Sos1             | 7.72108   | 5.58262         | 0          | 1         | 1         |
| Cdkl4_j3         | 0.700595  | 0.271455        | -1.36787   | 0.0008671 | 0.0127466 |
| Map4k3_j5        | 2.08949   | 2.23621         | 0          | 1         | 1         |
| Map4k3_j6        | 5.35926   | 3.51345         | 0          | 1         | 1         |
| Thumpd2_j3       | 0.325165  | 0.33243         | 0.0318766  | 1         | 1         |
| Thumpd2          | 0.179015  | 0.0773395       | -1.2108    | 0.0975407 | 0.385892  |
| Slc8a1_j2        | 0.0916212 | 0 -1.79769e+308 |            | 5.02E-05  | 1         |
| Slc8a1_j1        | 0.31951   | 0.0428193       | -2.89953   | 0.0002132 | 0.0040424 |
| Cox7a2l_j2       | 6.74574   | 7.60781         | 0          | 1         | 1         |
| XLOC_014639      | 0.147881  | 0 -1.79769e+308 |            | 0.0357252 | 0.20846   |
| XLOC_014639      | 0.0731139 | 0.0964996       | 0.400377   | 0.733128  | 1         |
| Lrpprc_j1        | 2.47314   | 3.06423         | 0          | 1         | 1         |
| Lrpprc_j3        | 8.51301   | 10.5109         | 0          | 1         | 1         |
| Lrpprc           | 1.73565   | 1.27761         | 0          | 1         | 1         |
| 1110020A21Rik    | 0.279055  | 0.237718        | -0.231299  | 0.633695  | 0.857901  |
| Prepl            | 85.4846   | 66.259          | 0          | 1         | 1         |
| Six2             | 0.30694   | 0.443527        | 0.531063   | 0.129702  | 0.448649  |
| Srbd1            | 2.68186   | 3.22413         | 0.265676   | 0.0730336 | 0.325396  |
| Mcf2_j1          | 3.26477   | 4.11649         | 0.334436   | 0.127829  | 0.445499  |
| Mcf2             | 30.7026   | 28.6846         | -0.0980836 | 0.323222  | 0.6662    |
| XLOC_014658      | 0.117957  | 0.0840037       | -0.489738  | 0.633245  | 1         |
| Kcnk12_j1        | 0.325706  | 0 -1.79769e+308 |            | 3.93E-11  | 4.33E-09  |
| Kcnk12           | 4.5461    | 4.32672         | -0.071354  | 0.535101  | 0.806052  |
| Fbxo11           | 11.6309   | 10.5573         | 0          | 1         | 1         |
| Fbxo11           | 6.55933   | 5.81792         | 0          | 1         | 1         |
| Nrxn1_j9         | 1.80415   | 0.405711        | 0          | 1         | 1         |
| Nrxn1_j12        | 0.426982  | 0.000407446     | 0          | 1         | 1         |
| Mettl4_j3        | 1.13301   | 1.0998          | 0          | 1         | 1         |
| Mettl4_j1        | 0.614127  | 1.03821         | 0          | 1         | 1         |
| Scaf8_j5         | 0.405414  | 0.401708        | 0          | 1         | 1         |
| Tiam2_j2         | 0.413409  | 0.52155         | 0          | 1         | 1         |
| XLOC_013764      | 0.140826  | 0 -1.79769e+308 |            | 0.0001225 | 0.0025461 |
| XLOC_013766      | 0.22124   | 0.306432        | 0.469951   | 0.4191    | 0.735794  |
| Zdhhc14_j4       | 1.14293   | 0.958619        | -0.253706  | 0.730091  | 0.904677  |
| Snx9_j4          | 0.430086  | 0.187042        | 0          | 1         | 1         |
| Tmem181a_j2      | 0.711554  | 0.743626        | 0.0636044  | 1         | 1         |
| Rps6ka2_j3       | 1.44065   | 1.93252         | 0          | 1         | 1         |
| Pde10a_j3        | 0.949812  | 0.625099        | 0          | 1         | 1         |
| Park2_j5         | 1.24509   | 1.4192          | 0.188819   | 0.518345  | 0.796444  |
| Tcp1             | 0.495865  | 0.112096        | -2.14522   | 0.000557  | 0.008925  |
| Tcp10a_j2        | 0.174878  | 0.0982763       | -0.831431  | 0.453721  | 0.758205  |
| Mllt4_j11        | 0.891631  | 1.30091         | 0          | 1         | 1         |
| 1600012H06Rik    | 1.41877   | 1.46274         | 0          | 1         | 1         |
| 2210404J11Rik_j1 | 3.18623   | 3.09958         | -0.0397801 | 0.803176  | 0.934684  |
| Fam120b_j1       | 7.76426   | 7.67809         | 0          | 1         | 1         |
| Tbp              | 0.631655  | 0.516363        | -0.290751  | 0.168009  | 0.504618  |
| Tbp              | 0.783669  | 0.94467         | 0.269567   | 0.332022  | 0.673438  |

|                  |           |          |               |           |          |
|------------------|-----------|----------|---------------|-----------|----------|
| Tbp              | 0.523099  | 0.285878 | -0.871686     | 0.0476193 | 0.250615 |
| Tbp_j3           | 0         | 0.106104 | 1.79769e+308  | 0.0133095 | 1        |
| Chd1_j5          | 0.384017  | 0.4992   | 0             | 1         | 1        |
| Chd1_j7          | 1.43479   | 2.0329   | 0             | 1         | 1        |
| 4930546H06Rik_j3 | 0.477455  | 0.514517 | 0.107853      | 0.855347  | 0.954239 |
| Zfp160_j1        | 0.898431  | 0.92222  | 0.0377044     | 0.885576  | 0.963692 |
| Zfp677_j2        | 0.0658784 | 0        | -1.79769e+308 | 0.014913  | 1        |
| Zfp677_j1        | 0.0167171 | 0.145697 | 3.12358       | 0.0387346 | 1        |
| Zfp53            | 0.867487  | 0.999652 | 0.204582      | 0.461067  | 0.762373 |
| KRAZ1            | 0.147344  | 0.109509 | -0.42814      | 0.539207  | 0.808383 |
| KRAZ1_j1         | 0.19003   | 0.224266 | 0.238984      | 0.646428  | 0.863677 |
| Zfp52            | 3.32326   | 3.25531  | -0.0298019    | 0.833922  | 0.94651  |
| Zfp948_j1        | 1.58449   | 1.96775  | 0             | 1         | 1        |
| 3110052M02Rik_j1 | 0.218854  | 0.180407 | 0             | 1         | 1        |
| 3110052M02Rik_j2 | 0.995742  | 1.01015  | 0             | 1         | 1        |
| Zfp760_j5        | 0.823644  | 0.853198 | 0             | 1         | 1        |
| Zfp760_j3        | 1.14513   | 1.02286  | 0             | 1         | 1        |
| Zfp943_j1        | 1.46956   | 2.38855  | 0             | 1         | 1        |
| XLOC_013840      | 0.0678984 | 0.191103 | 1.4929        | 0.30671   | 0.651965 |
| Hcfc1r1_j2       | 113.541   | 109.324  | -0.0546045    | 0.56716   | 0.82484  |
| Srrm2_j1         | 0.447989  | 0.415367 | 0             | 1         | 1        |
| Rnps1_j1         | 3.08943   | 3.87248  | 0.325918      | 0.199233  | 0.542218 |
| Rnps1_j2         | 4.76474   | 5.46808  | 0.198637      | 0.525722  | 0.800884 |
| Dci_j1           | 7.31051   | 5.71525  | -0.355156     | 0.118279  | 0.428203 |
| Dci_j2           | 4.46541   | 4.00658  | -0.156422     | 0.610657  | 0.846532 |
| Caskin1          | 6.95894   | 3.90558  | 0             | 1         | 1        |
| mKIAA1306_j4     | 9.14172   | 8.57007  | 0             | 1         | 1        |
| Pkd1_j9          | 0.315281  | 0.408462 | 0             | 1         | 1        |
| Nthl1_j1         | 0.374768  | 0.164011 | -1.19221      | 0.304303  | 0.649996 |
| Nthl1_j3         | 0.211027  | 0.416162 | 0.97972       | 0.418007  | 0.734998 |
| Zfp598_j3        | 1.24794   | 1.54647  | 0             | 1         | 1        |
| Hs3st6_j1        | 0.6444    | 0.613435 | -0.0710455    | 0.88312   | 0.962848 |
| Hagh_j5          | 6.10112   | 6.29051  | 0             | 1         | 1        |
| Spsb3_j1         | 9.74333   | 10.0862  | 0             | 1         | 1        |
| Ift140_j3        | 4.65455   | 4.7556   | 0             | 1         | 1        |
| Clcn7_j2         | 0.136913  | 0        | -1.79769e+308 | 0.0056383 | 1        |
| Unkl_j1          | 0.952085  | 1.04106  | 0             | 1         | 1        |
| O610007P22Rik_j1 | 10.8147   | 11.452   | 0             | 1         | 1        |
| O610007P22Rik    | 1.81604   | 2.00566  | 0             | 1         | 1        |
| Gng13            | 0.386445  | 0.402191 | 0.0576151     | 0.936225  | 0.980422 |
| Rpusd1_j2        | 1.79442   | 2.15184  | 0             | 1         | 1        |
| Rpusd1_j1        | 1.42564   | 0.921339 | 0             | 1         | 1        |
| Fbxl16_j5        | 1.85525   | 1.57037  | 0             | 1         | 1        |
| Wdr24_j1         | 1.02729   | 1.07766  | 0.0690592     | 0.802172  | 0.934265 |
| Tmem8            | 8.89849   | 8.22346  | -0.113815     | 0.400441  | 0.723914 |
| Luc7l            | 4.37823   | 4.56815  | 0.0612643     | 0.748104  | 0.912349 |
| Bnip1            | 11.2956   | 11.3301  | 0             | 1         | 1        |

|                  |           |           |              |           |           |
|------------------|-----------|-----------|--------------|-----------|-----------|
| Kifc5b_j8        | 0         | 0.14987   | 1.79769e+308 | 0.115124  | 1         |
| Phf1_j3          | 1.11223   | 1.07984   | 0            | 1         | 1         |
| Itpr3_j1         | 0.415381  | 0.583734  | 0            | 1         | 1         |
| Itpr3_j2         | 2.31859   | 2.41346   | 0            | 1         | 1         |
| Snrpc_j2         | 0.241546  | 0.503676  | 1.0602       | 0.289669  | 0.637033  |
| Snrpc_j6         | 0.255035  | 0.204111  | -0.32134     | 0.769811  | 0.921491  |
| Uhrf1bp1_j2      | 0.160831  | 0.104242  | -0.625607    | 0.192409  | 0.534598  |
| XLOC_013911      | 0.1075    | 0.0834822 | -0.364797    | 0.666086  | 1         |
| Ppard_j1         | 0.407934  | 0.722576  | 0.824813     | 0.0302222 | 0.186654  |
| Fance            | 1.46212   | 1.68305   | 0.203014     | 0.466172  | 0.765927  |
| Rpl10a_j3        | 0.524871  | 0.471571  | -0.154489    | 0.654895  | 0.868233  |
| Rpl10a_j6        | 4.72549   | 5.11594   | 0.114537     | 0.478031  | 0.77269   |
| Mapk14           | 9.77577   | 15.2286   | 0            | 1         | 1         |
| Brpf3_j2         | 0.239329  | 0.316477  | 0            | 1         | 1         |
| Brpf3_j1         | 0.481242  | 0.511868  | 0            | 1         | 1         |
| Brpf3            | 1.29331   | 1.58303   | 0            | 1         | 1         |
| Sfrs3_j1         | 1.98073   | 2.8318    | 0.515686     | 0.0094655 | 0.0822623 |
| Sfrs3_j10        | 29.1702   | 28.5322   | -0.0319037   | 0.762191  | 0.918113  |
| Cdkn1a           | 23.571    | 51.2096   | 0            | 1         | 1         |
| Fgd2             | 0.281075  | 0.43751   | 0.638362     | 0.138666  | 0.463124  |
| Fgd2_j8          | 0         | 0.0843701 | 1.79769e+308 | 0.116193  | 1         |
| Fgd2_j9          | 0.115246  | 0.195064  | 0.75923      | 0.502886  | 0.786859  |
| Fgd2_j10         | 0.135257  | 0.400933  | 1.56766      | 0.0579329 | 0.282484  |
| Rnf8_j1          | 3.34778   | 3.52684   | 0.0751709    | 0.785803  | 0.928253  |
| Slc37a1_j1       | 4.03633   | 5.33216   | 0            | 1         | 1         |
| Rrp1b_j3         | 0.206025  | 0.130515  | -0.6586      | 0.252488  | 0.6005    |
| C920016K16Rik_j2 | 0.119451  | 0.128453  | 0            | 1         | 1         |
| Zfp563           | 0.182333  | 0.249856  | 0.454523     | 0.180244  | 0.519878  |
| Pram1_j2         | 6.69979   | 8.74926   | 0            | 1         | 1         |
| Pram1_j1         | 4.58286   | 5.19264   | 0            | 1         | 1         |
| AK133808         | 1.80258   | 1.90486   | 0.0796236    | 0.754271  | 0.915325  |
| Kank3_j4         | 1.65782   | 1.6073    | -0.0446477   | 0.883323  | 0.962963  |
| Ndufa7_j2        | 1.98537   | 0.303827  | -2.70809     | 0.0333389 | 0.199285  |
| Ndufa7_j5        | 4.49536   | 4.03868   | -0.154555    | 0.718842  | 0.898857  |
| Daxx_j2          | 1.54079   | 1.42869   | -0.108972    | 0.68747   | 0.883849  |
| Rgl2_j2          | 0.12497   | 0.0888066 | -0.49284     | 0.355584  | 1         |
| Vps52_j3         | 0.411353  | 0.380624  | 0            | 1         | 1         |
| Rxrb             | 0.333453  | 0.520185  | 0.641543     | 0.024657  | 0.162784  |
| Col11a2_j4       | 0.259523  | 0.0749461 | -1.79193     | 0.0029661 | 0.0341658 |
| Col11a2_j6       | 0.0832191 | 0.278464  | 1.7425       | 0.0009654 | 0.0139071 |
| H2-DMa           | 0.405658  | 0.56757   | 0.484535     | 0.372482  | 0.705484  |
| H2-DMa_j1        | 5.13525   | 5.96536   | 0.216174     | 0.169817  | 0.506768  |
| H2-DMa_j2        | 0.430354  | 0.17663   | -1.28479     | 0.128101  | 0.446034  |
| Psm8             | 0.527174  | 0.556633  | 0.0784495    | 0.863815  | 0.956651  |
| BC051142_j8      | 0.224497  | 0.127101  | -0.820717    | 0.497603  | 0.783786  |
| Gpsm3            | 3.17412   | 3.6763    | 0.211898     | 0.233215  | 0.580492  |
| Prmt1_j2         | 0.099879  | 0.267802  | 1.42291      | 0.061944  | 0.294428  |

|                  |           |                 |             |           |           |
|------------------|-----------|-----------------|-------------|-----------|-----------|
| Tnxb_j12         | 0.111668  | 0.376223        | 1.75237     | 0.0003266 | 0.0057326 |
| Tnxb_j13         | 1.29986   | 1.19415         | -0.122368   | 0.577197  | 0.829389  |
| Zbtb12           | 0.744887  | 0.735956        | -0.0174026  | 0.956973  | 0.987617  |
| Vars_j3          | 0.0334934 | 0.0992258       | 0           | 1         | 1         |
| Vars_j4          | 0.846     | 1.25159         | 0           | 1         | 1         |
| D17H6S56E-3_j8   | 2.40985   | 2.56694         | 0           | 1         | 1         |
| D17H6S56E-3      | 2.17991   | 1.92206         | 0           | 1         | 1         |
| Clic1            | 11.0212   | 24.9681         | 0           | 1         | 1         |
| Clic1_j2         | 0.346985  | 0.671104        | 0           | 1         | 1         |
| Bat3_j9          | 22.6289   | 20.2791         | 0           | 1         | 1         |
| Bat3_j17         | 1.79541   | 3.4399          | 0           | 1         | 1         |
| Atp6v1g2_j1      | 0.539553  | 0.109186        | -2.30498    | 0.0165449 | 0.12335   |
| Cchcr1_j1        | 0.239141  | 0.221767        | -0.10882    | 0.851728  | 0.952951  |
| Flot1_j1         | 129.196   | 148.494         | 0           | 1         | 1         |
| Dhx16            | 4.25786   | 4.3138          | 0           | 1         | 1         |
| Ppp1r10          | 5.67392   | 8.00894         | 0           | 1         | 1         |
| 2410017I17Rik_j1 | 2.41369   | 2.29178         | -0.0747736  | 0.872815  | 0.959747  |
| XLOC_014026      | 1.20147   | 0.574708        | 0           | 1         | 1         |
| Znr1as           | 1.50851   | 1.57195         | 0.0594264   | 0.864549  | 0.956928  |
| Znr1as_j1        | 0.903741  | 0.934015        | 0.0475372   | 0.913156  | 0.972756  |
| Gabbr1_j4        | 90.8502   | 95.2511         | 0           | 1         | 1         |
| 3110082D06Rik_j2 | 0.121867  | 0.249761        | 1.03524     | 0.206099  | 0.550568  |
| Pla2g7           | 7.57027   | 4.60889         | 0           | 1         | 1         |
| Pla2g7_j6        | 86.391    | 68.7409         | 0           | 1         | 1         |
| Cyp39a1          | 1.90593   | 2.29064         | 0.265261    | 0.221891  | 0.569069  |
| Enpp5_j2         | 2.8462    | 3.12059         | 0.132781    | 0.595446  | 0.838859  |
| XLOC_014054      | 0.192727  | 0.11068         | -0.800164   | 0.335184  | 0.675791  |
| Aars2_j1         | 0.171169  | 0.26079         | 0.607465    | 0.275025  | 0.624065  |
| Mrpl14           | 22.7429   | 25.0968         | 0           | 1         | 1         |
| Mrps18a_j1       | 31.6313   | 31.5213         | -0.00502383 | 0.973549  | 0.99239   |
| Gtpbp2           | 5.71818   | 6.56913         | 0           | 1         | 1         |
| Crip3_j5         | 0.064576  | 0.0323421       | -0.997586   | 0.572896  | 1         |
| Crip3_j7         | 0.108004  | 0 -1.79769e+308 | 0.0090967   | 0.196179  | 1         |
| Crip3_j6         | 0.041624  | 0.122194        | 1.55369     | 0.0383912 | 1         |
| Crip3_j8         | 0.0477994 | 0 -1.79769e+308 | 0.0383912   | 1         | 1         |
| BC048355_j1      | 0.441701  | 0.0776481       | 0           | 1         | 1         |
| Pex6_j2          | 5.69413   | 6.64201         | 0           | 1         | 1         |
| Trerf1_j2        | 0.209209  | 0.324997        | 0.635481    | 0.12548   | 0.441257  |
| Trerf1_j6        | 0.152511  | 0.19818         | 0.377895    | 0.472636  | 0.769633  |
| Trerf1_j8        | 0.322326  | 0.0508455       | -2.66433    | 9.71E-05  | 0.0020983 |
| Mrps10_j7        | 0.0986132 | 0.463847        | 0           | 1         | 1         |
| Med20            | 5.21101   | 5.64079         | 0           | 1         | 1         |
| Usp49_j7         | 1.80856   | 1.80218         | 0           | 1         | 1         |
| Frs3_j1          | 1.43155   | 1.60491         | 0           | 1         | 1         |
| AI314976         | 2.68497   | 1.87991         | -0.514238   | 0.0706649 | 0.319546  |
| AI314976_j1      | 1.41952   | 1.86461         | 0.393476    | 0.395722  | 0.720784  |
| XLOC_014093      | 0.176503  | 0.161692        | -0.126445   | 0.78877   | 0.929506  |

|               |           |           |               |           |           |
|---------------|-----------|-----------|---------------|-----------|-----------|
| Zfp959_j7     | 0.457078  | 0.374253  | -0.288426     | 0.58885   | 0.835806  |
| Ccdc94        | 0.179402  | 0.370862  | 1.04768       | 0.0764788 | 0.334147  |
| Hdgfrp2_j3    | 4.21929   | 5.0835    | 0             | 1         | 1         |
| AK038632      | 0.0955886 | 0.216487  | 1.17937       | 0.188199  | 0.529448  |
| Kdm4b_j4      | 6.35701   | 7.2851    | 0.196601      | 0.0815706 | 0.347939  |
| Safb_j3       | 1.0141    | 1.1916    | 0             | 1         | 1         |
| Safb_j5       | 1.95559   | 1.97711   | 0             | 1         | 1         |
| Tmem146_j2    | 0.0753399 | 0.0320035 | -1.23518      | 0.436118  | 1         |
| Tmem146_j1    | 0.284732  | 0.181196  | -0.65205      | 0.298411  | 0.644991  |
| Ranbp3_j3     | 2.03249   | 2.23169   | 0             | 1         | 1         |
| Alkbh7        | 0.563263  | 0.538231  | -0.0655837    | 0.896177  | 0.967019  |
| Emr1_j3       | 0         | 0.093867  | 1.79769e+308  | 0.0213698 | 1         |
| Cntnap5c_j4   | 0.130765  | 0         | -1.79769e+308 | 0.007629  | 1         |
| Cntnap5c_j9   | 0.163156  | 0.126482  | -0.367315     | 0.64591   | 0.863424  |
| Fert2_j5      | 0.182623  | 0.109991  | 0             | 1         | 1         |
| Ppp4r1_j2     | 0.179319  | 1.92891   | 0             | 1         | 1         |
| Ppp4r1        | 4.55182   | 6.74574   | 0             | 1         | 1         |
| ORF19         | 5.41879   | 7.50801   | 0             | 1         | 1         |
| ORF19_j2      | 1.30969   | 0.856258  | 0             | 1         | 1         |
| XLOC_014140   | 0.113208  | 0.0192471 | -2.55626      | 0.239037  | 1         |
| L3mbt4        | 0.441875  | 0.280067  | -0.657869     | 0.209798  | 0.554224  |
| L3mbt4_j9     | 0.102426  | 0.209826  | 1.03461       | 0.197994  | 0.541125  |
| L3mbt4_j14    | 0.446853  | 0.231647  | -0.947872     | 0.003767  | 0.0411018 |
| L3mbt4_j16    | 0.106187  | 0.1786    | 0.750126      | 0.311085  | 0.655898  |
| Tmem200c_j1   | 1.26783   | 1.36517   | 0.106719      | 0.617006  | 0.849275  |
| Epb4.1l3_j2   | 24.8989   | 30.2529   | 0             | 1         | 1         |
| Epb4.1l3_j8   | 5.84979   | 4.55421   | 0             | 1         | 1         |
| Zfp161_j1     | 0.835531  | 0.712194  | 0             | 1         | 1         |
| C030034I22Rik | 0.489441  | 0.48556   | -0.0114854    | 0.966789  | 0.990488  |
| Dlgap1_j2     | 2.05389   | 2.46795   | 0             | 1         | 1         |
| Myom1_j4      | 0.221039  | 0.18491   | -0.257474     | 0.628933  | 0.855714  |
| Clip4_j3      | 11.7254   | 6.62775   | 0             | 1         | 1         |
| Ypel5         | 15.5489   | 13.9972   | 0             | 1         | 1         |
| Ehd3_j1       | 21.635    | 20.5602   | 0             | 1         | 1         |
| Spast         | 8.7926    | 8.8786    | 0.0140424     | 0.894999  | 0.966853  |
| Birc6_j10     | 0.863692  | 0.742568  | -0.217994     | 0.282831  | 0.631365  |
| Ltbp1_j10     | 0.275173  | 0.806465  | 0             | 1         | 1         |
| Ltbp1_j9      | 0         | 0.295861  | 0             | 1         | 1         |
| Crim1_j3      | 0.36376   | 0.332655  | -0.12896      | 0.739172  | 0.908403  |
| Crim1_j7      | 0.754649  | 0.774987  | 0.0383675     | 0.930691  | 0.97884   |
| Vit_j1        | 0         | 0.16044   | 1.79769e+308  | 0.0077497 | 0.0709975 |
| Fam82a1_j8    | 1.75559   | 0.984441  | -0.83458      | 0.0005788 | 0.0092074 |
| Fam82a1       | 0.551525  | 0.238074  | -1.21201      | 0.0258754 | 0.168432  |
| Galm_j2       | 0.121028  | 0         | -1.79769e+308 | 0.0223635 | 1         |
| Arhgef33_j3   | 0.411836  | 0.107322  | -1.94013      | 0.13802   | 0.461827  |
| Pkdcc_j1      | 0.491571  | 0.660558  | 0.426287      | 0.423984  | 0.739374  |
| Mta3_j5       | 1.17372   | 2.51237   | 0             | 1         | 1         |

|               |            |           |              |           |          |
|---------------|------------|-----------|--------------|-----------|----------|
| Plekhh2       | 0.0424467  | 0.151622  | 1.83675      | 0.0316173 | 1        |
| Ppm1b         | 1.07519    | 0.594498  | -0.854851    | 0.0244593 | 0.161852 |
| Ppm1b         | 1.47104    | 1.42661   | -0.0442534   | 0.882173  | 0.962591 |
| 1700106N22Rik | 5.91083    | 6.18322   | 0.0649988    | 0.693471  | 0.886723 |
| Prkce         | 8.45533    | 6.56496   | 0            | 1         | 1        |
| Rhoq_j7       | 27.1817    | 58.461    | 1.10484      | 0         | 0        |
| Socs5_j3      | 13.6061    | 11.8447   | -0.200013    | 0.0482384 | 0.252681 |
| Ttc7_j2       | 0.0405588  | 0.102351  | 1.33544      | 0.114174  | 1        |
| Ttc7_j3       | 0.216883   | 0.229095  | 0.0790273    | 0.882657  | 0.962648 |
| Msh2_j1       | 0.233384   | 0.107435  | -1.11924     | 0.258798  | 0.607552 |
| Msh2_j3       | 2.52426    | 4.18888   | 0.730705     | 0.0341196 | 0.202314 |
| XLOC_014209   | 0.15232    | 0.131651  | -0.210386    | 0.853813  | 0.953756 |
| Foxn2_j2      | 0.423133   | 0.380363  | -0.153735    | 1         | 1        |
| Klraq1_j1     | 6.16924    | 6.70205   | 0.119511     | 0.500725  | 0.785042 |
| Adcyap1_j1    | 1.19899    | 2.89644   | 0            | 1         | 1        |
| Adcyap1_j4    | 12.0888    | 20.2737   | 0            | 1         | 1        |
| Pisd-ps2_j1   | 0.764555   | 0.569609  | -0.424648    | 0.191979  | 0.534172 |
| Pisd-ps2_j9   | 3.81622    | 7.05789   | 0.887095     | 2.03E-08  | 1.34E-06 |
| Tfb1m_j1      | 0.156858   | 0.0742405 | 0            | 1         | 1        |
| Tmem181b      | 1.516      | 1.31979   | 0            | 1         | 1        |
| XLOC_014230   | 0.579561   | 1.17235   | 0            | 1         | 1        |
| AK037830      | 0.212166   | 0.334883  | 0            | 1         | 1        |
| AK037830_j2   | 0.323782   | 0.34898   | 0            | 1         | 1        |
| Rsph3b_j1     | 4.36877    | 2.943     | -0.56994     | 0.0041452 | 0.044054 |
| Rnaset2a_j2   | 0.569336   | 0.191888  | -1.56902     | 0.267302  | 0.616207 |
| Qk            | 3.56313    | 3.48708   | 0            | 1         | 1        |
| Qk_j7         | 0.161525   | 0.114485  | 0            | 1         | 1        |
| Map3k4_j3     | 1.03107    | 1.35825   | 0            | 1         | 1        |
| Map3k4        | 0.607614   | 0.10636   | 0            | 1         | 1        |
| Pnlcd1_j2     | 0.0998154  | 0.0782515 | -0.351144    | 0.851747  | 1        |
| Pnlcd1_j3     | 0.079821   | 0.0416165 | -0.939611    | 0.616424  | 1        |
| Acat2         | 14.544     | 13.7415   | -0.0818871   | 0.480744  | 0.774445 |
| Wtap_j6       | 22.2142    | 24.3823   | 0            | 1         | 1        |
| XLOC_014258   | 0.103693   | 0.0806274 | -0.36298     | 0.685105  | 1        |
| AK143195      | 0.165013   | 0.280368  | 0.764742     | 0.241432  | 0.588512 |
| Tcte2_j2      | 0.103545   | 0.0616777 | -0.747435    | 0.576653  | 1        |
| Tcte3         | 0.338989   | 0.255575  | -0.40749     | 0.601042  | 0.841992 |
| Pdcd2_j1      | 12.7128    | 14.3551   | 0.175279     | 0.249793  | 0.597201 |
| Pdcd2         | 3.76979    | 4.11167   | 0.125239     | 0.563304  | 0.822523 |
| Prdm9         | 0.00297913 | 0.306172  | 6.68331      | 0.0523095 | 0.265559 |
| Prdm9_j7      | 0          | 0.0813564 | 1.79769e+308 | 0.0203109 | 1        |
| Rgmb_j1       | 34.5352    | 28.9879   | 0            | 1         | 1        |
| Rgmb_j2       | 6.79215    | 6.87349   | 0            | 1         | 1        |
| Zfp942_j1     | 0.397447   | 0.589018  | 0.567548     | 0.160326  | 0.49487  |
| Zfp945_j1     | 3.76971    | 4.2248    | 0            | 1         | 1        |
| Zfp945        | 1.4459     | 1.41527   | 0            | 1         | 1        |
| Mmp25_j7      | 0.311899   | 1.49549   | 0            | 1         | 1        |

|             |           |           |               |           |           |
|-------------|-----------|-----------|---------------|-----------|-----------|
| Mmp25_j8    | 0.512358  | 0.19174   | 0             | 1         | 1         |
| Thoc6       | 2.75702   | 2.02663   | -0.444029     | 0.0214848 | 0.147997  |
| Thoc6_j1    | 0.107692  | 0.164285  | 0.609293      | 0.302641  | 0.648636  |
| XLOC_014295 | 0.26415   | 0.358543  | 0.44079       | 0.343919  | 0.683921  |
| AK047830_j3 | 0.260604  | 0.329832  | 0.339875      | 0.571496  | 0.826903  |
| Paqr4_j2    | 37.8718   | 30.997    | 0             | 1         | 1         |
| Kremen2_j2  | 0.0771834 | 0         | -1.79769e+308 | 0.0588779 | 1         |
| Flywch1_j2  | 1.10395   | 1.52057   | 0             | 1         | 1         |
| Tceb2       | 2.97079   | 7.97029   | 0             | 1         | 1         |
| Amdhd2_j1   | 0.229865  | 0         | 0             | 1         | 1         |
| Amdhd2      | 6.70913   | 6.73836   | 0             | 1         | 1         |
| Atp6v0c_j1  | 61.1511   | 70.8071   | 0.211515      | 0.0200605 | 0.141139  |
| Tbc1d24_j6  | 0.534738  | 0.0367254 | -3.86398      | 5.32E-09  | 3.94E-07  |
| E4f1_j4     | 0.414408  | 0.549268  | 0.406458      | 0.141971  | 0.468515  |
| Tsc2_j1     | 0.80751   | 0.543415  | 0             | 1         | 1         |
| Slc9a3r2    | 0.308592  | 0.0646247 | 0             | 1         | 1         |
| Tbl3_j3     | 0.606766  | 0.34688   | 0             | 1         | 1         |
| Nubp2_j1    | 15.9249   | 15.9137   | 0             | 1         | 1         |
| Nubp2       | 15.9516   | 16.5019   | 0             | 1         | 1         |
| Nubp2_j2    | 9.50051   | 10.0145   | 0             | 1         | 1         |
| Mapk8ip3_j1 | 5.48182   | 4.56947   | 0             | 1         | 1         |
| Mapk8ip3_j2 | 0.141696  | 0         | 0             | 1         | 1         |
| Telo2       | 1.57567   | 1.78476   | 0             | 1         | 1         |
| Gnptg       | 4.12677   | 3.82161   | 0             | 1         | 1         |
| Cacna1h_j4  | 1.18096   | 0.638787  | 0             | 1         | 1         |
| Cacna1h_j3  | 2.74019   | 2.20918   | 0             | 1         | 1         |
| Haghl_j3    | 28.6964   | 22.7145   | -0.337252     | 0.0011883 | 0.0164222 |
| Rhbdl1_j2   | 2.63508   | 2.25983   | -0.221631     | 0.26042   | 0.609134  |
| Rhot2_j7    | 17.6131   | 18.6091   | 0.0793613     | 0.537822  | 0.807802  |
| Wdr90_j1    | 2.31108   | 2.2788    | -0.0202923    | 0.890771  | 0.965446  |
| Pigq_j2     | 16.8989   | 16.7732   | 0             | 1         | 1         |
| Solh_j4     | 0.410821  | 0.198849  | 0             | 1         | 1         |
| Solh        | 4.41505   | 4.16678   | 0             | 1         | 1         |
| Decr2_j3    | 0.411722  | 0.510473  | 0.310163      | 0.526345  | 0.801033  |
| Nme4        | 1.39204   | 1.80735   | 0.376674      | 0.170076  | 0.507178  |
| Pdia2_j6    | 0.0580036 | 0.0736114 | 0.343789      | 0.741158  | 1         |
| Itfg3       | 7.53774   | 6.62805   | 0             | 1         | 1         |
| Dusp1_j1    | 11.003    | 15.6451   | 0.507817      | 0.0001415 | 0.0028657 |
| Cuta_j1     | 0.122694  | 0.189387  | 0             | 1         | 1         |
| Lemd2_j3    | 2.22886   | 1.47384   | 0             | 1         | 1         |
| AK036033_j5 | 0         | 0.0859811 | 1.79769e+308  | 0.155441  | 1         |
| Taf11_j1    | 12.5718   | 14.0389   | 0             | 1         | 1         |
| Taf11_j3    | 0.520185  | 0.528458  | 0             | 1         | 1         |
| Tcp11_j1    | 0.0613769 | 0.102678  | 0.742364      | 0.462361  | 1         |
| Tead3_j3    | 0.210672  | 0.18337   | -0.200247     | 0.785871  | 0.928311  |
| Slc26a8_j11 | 0.118206  | 0.0276437 | -2.09628      | 0.31955   | 1         |
| Slc26a8_j20 | 0         | 0.0861694 | 1.79769e+308  | 0.0551421 | 1         |



|               |             |           |               |           |           |
|---------------|-------------|-----------|---------------|-----------|-----------|
| Stk38_j8      | 0.0590046   | 0.196604  | 0             | 1         | 1         |
| Stk38         | 0.47144     | 0.660261  | 0             | 1         | 1         |
| Mtch1         | 54.7669     | 62.9868   | 0             | 1         | 1         |
| 1110021J02Rik | 0.75122     | 0.697699  | -0.106631     | 0.688426  | 0.88417   |
| Btbd9_j4      | 1.33838     | 0.944761  | 0             | 1         | 1         |
| Btbd9_j5      | 4.09481     | 3.9106    | 0             | 1         | 1         |
| Wdr4_j3       | 0.126207    | 0.209787  | 0             | 1         | 1         |
| Wdr4_j5       | 0.737806    | 0.658357  | 0             | 1         | 1         |
| Wdr4_j4       | 2.00656     | 2.63102   | 0             | 1         | 1         |
| U2af1_j4      | 2.32425     | 2.55752   | 0.137977      | 0.370358  | 0.703609  |
| U2af1_j2      | 0.260282    | 0.172161  | -0.596322     | 0.461943  | 0.763026  |
| Sik1_j1       | 0.187502    | 0.319396  | 0.768438      | 0.0998743 | 0.391346  |
| Notch3_j2     | 0.571554    | 0.677827  | 0.246026      | 0.45295   | 0.757909  |
| Notch3_j3     | 0.0844659   | 0.192874  | 1.19122       | 0.0261509 | 0.169726  |
| Notch3_j13    | 0.0939701   | 0.0494456 | -0.926359     | 0.536485  | 1         |
| Brd4_j1       | 0.255224    | 0.210911  | -0.275129     | 0.562236  | 0.822079  |
| Brd4_j2       | 1.58149     | 1.55241   | -0.0267798    | 0.881081  | 0.962197  |
| Brd4_j3       | 2.43523     | 2.58274   | 0.0848487     | 0.563882  | 0.822998  |
| Akap8l_j9     | 0.781965    | 0         | -1.79769e+308 | 5.16E-24  | 1.61E-21  |
| Akap8l_j8     | 0.147648    | 1.75051   | 3.56754       | 0         | 0         |
| Wiz_j1        | 3.1024      | 3.29721   | 0.0878608     | 0.593377  | 0.838009  |
| Cyp4f13_j1    | 0.000119486 | 1.04582   | 13.0955       | 0.885768  | 0.963751  |
| Cyp4f13_j2    | 0.141974    | 0.0536678 | -1.4035       | 0.354036  | 0.690183  |
| Hnrnpm_j2     | 8.81316     | 8.27743   | 0             | 1         | 1         |
| March2_j1     | 4.58646     | 1.86898   | 0             | 1         | 1         |
| Rab11b_j7     | 0.225934    | 0.327735  | 0.536627      | 0.394991  | 0.720135  |
| Rab11b_j6     | 0.274276    | 0.648596  | 1.24169       | 0.0145249 | 0.112329  |
| Rab11b_j5     | 1.32998     | 1.24687   | -0.0930989    | 0.761455  | 0.917949  |
| Angptl4_j2    | 2.9332      | 4.29601   | 0.550521      | 0.0224184 | 0.152659  |
| Rps18_j3      | 0.404433    | 0.200933  | 0             | 1         | 1         |
| H2-Ke6_j4     | 0.206364    | 0.378242  | 0.874119      | 0.00361   | 0.0399016 |
| H2-Ke6_j3     | 0.299554    | 0.473972  | 0.661987      | 0.0133942 | 0.106204  |
| Psmb9_j1      | 3.49874     | 3.36584   | -0.0558684    | 0.831735  | 0.945814  |
| Psmb9         | 1.49057     | 0.86138   | -0.791143     | 0.0625167 | 0.295851  |
| Egfl8_j6      | 14.7714     | 17.0725   | 0.208868      | 0.0546383 | 0.272571  |
| Stk19_j1      | 1.54383     | 0.863327  | 0             | 1         | 1         |
| Csnk2b_j2     | 3.89779     | 5.69644   | 0.547406      | 0.0570576 | 0.279855  |
| Prrc2a_j1     | 9.51151     | 15.4075   | 0             | 1         | 1         |
| Vars2_j5      | 0           | 0.0828095 | 1.79769e+308  | 0.0972499 | 1         |
| Gtf2h4_j1     | 2.40484     | 2.71053   | 0.172635      | 0.579344  | 0.830904  |
| Ddr1_j1       | 2.80233     | 2.07855   | 0             | 1         | 1         |
| Ddr1_j2       | 6.86569     | 7.17238   | 0             | 1         | 1         |
| Tubb5_j1      | 1.18394     | 2.18106   | 0             | 1         | 1         |
| 2310061I04Rik | 0.590109    | 1.33861   | 0             | 1         | 1         |
| Prr3_j1       | 0.819047    | 1.42758   | 0             | 1         | 1         |
| Prr3          | 0.365485    | 0.286968  | 0             | 1         | 1         |
| H2-T24_j1     | 1.01273     | 1.22832   | 0.278431      | 0.346417  | 0.685483  |

|               |             |           |              |           |           |
|---------------|-------------|-----------|--------------|-----------|-----------|
| H2-T23        | 4.00704     | 3.99246   | 0            | 1         | 1         |
| H2-M1_j1      | 0.000846963 | 0.0784282 | 6.53293      | 0.813345  | 1         |
| Trim15_j2     | 0.0310987   | 0.157504  | 2.34046      | 0.0475276 | 0.250305  |
| Ppp1r11_j3    | 0.175197    | 0.101645  | 0            | 1         | 1         |
| Znrd1_j1      | 6.01164     | 6.87153   | 0.192873     | 0.410586  | 0.730412  |
| Znrd1_j2      | 7.92085     | 8.72112   | 0.138859     | 0.515293  | 0.794119  |
| Cd2ap_j4      | 5.90613     | 5.15892   | -0.195144    | 1         | 1         |
| Enpp4_j1      | 0.168019    | 0.26036   | 0            | 1         | 1         |
| Cdc5l_j2      | 9.33694     | 9.23608   | -0.0156688   | 0.910935  | 0.972049  |
| Cdc5l_j12     | 0           | 0.304207  | 1.79769e+308 | 0.0900687 | 0.368442  |
| Spats1_j4     | 0.360909    | 0.367332  | 0.0254482    | 0.971137  | 0.991879  |
| Spats1_j7     | 0.051394    | 0.158435  | 1.62422      | 0.269779  | 0.618841  |
| Tmem151b      | 1.01773     | 0.342367  | 0            | 1         | 1         |
| Slc29a1_j8    | 0           | 0.336256  | 1.79769e+308 | 0.0014478 | 0.0191767 |
| Slc29a1_j9    | 0.574094    | 0.950461  | 0.72734      | 0.0853424 | 0.356598  |
| Tmem63b_j4    | 5.87145     | 5.60044   | 0            | 1         | 1         |
| Polh          | 0.971591    | 0.831128  | 0            | 1         | 1         |
| Tjap1_j6      | 0.381774    | 0.172219  | 0            | 1         | 1         |
| Tjap1_j7      | 0.385934    | 0.216551  | 0            | 1         | 1         |
| Abcc10_j3     | 0.218907    | 0.251319  | 0.199203     | 0.719143  | 0.898969  |
| Abcc10        | 0.230678    | 0.0993375 | -1.21547     | 0.169445  | 0.506414  |
| Klc4_j3       | 1.17425     | 0.955566  | 0            | 1         | 1         |
| Klhdc3_j2     | 1.73749     | 0.849811  | -1.03179     | 0.0005101 | 0.0082712 |
| Klhdc3_j4     | 0.269154    | 0.268783  | -0.00198967  | 0.996044  | 0.998914  |
| Klhdc3_j1     | 2.73613     | 3.7201    | 0.443203     | 0.0116011 | 0.095653  |
| Gnmt          | 0.277587    | 0.147812  | -0.909172    | 0.197398  | 0.540303  |
| A330017A19Rik | 0.106713    | 0.128015  | 0            | 1         | 1         |
| Ubr2_j7       | 4.90826     | 5.19971   | 0            | 1         | 1         |
| Foxp4_j8      | 0.183946    | 0         | 0            | 1         | 1         |
| Foxp4_j4      | 1.61825     | 1.51056   | 0            | 1         | 1         |
| Foxp4_j9      | 0.953901    | 0.702305  | 0            | 1         | 1         |
| Nfya          | 1.82162     | 2.19065   | 0            | 1         | 1         |
| Daam2         | 2.17919     | 2.27221   | 0            | 1         | 1         |
| Daam2_j10     | 1.66362     | 1.8857    | 0            | 1         | 1         |
| Tbc1d5_j3     | 0.750362    | 1.30797   | 0            | 1         | 1         |
| Satb1_j3      | 0.774164    | 0         | 0            | 1         | 1         |
| Pot1b_j5      | 0.0997845   | 0.0383134 | -1.38097     | 0.267164  | 1         |
| Sema6b        | 0.790197    | 0.563624  | -0.487479    | 0.097596  | 0.385988  |
| Ptprs_j1      | 36.2696     | 34.9904   | 0            | 1         | 1         |
| Ptprs         | 30.6724     | 27.9062   | 0            | 1         | 1         |
| Safb2_j4      | 7.17944     | 8.07794   | 0            | 1         | 1         |
| Mllt1_j1      | 0.259142    | 0.238801  | -0.11793     | 0.795648  | 0.931954  |
| Gtf2f1_j2     | 0           | 0.318498  | 1.79769e+308 | 0.0045019 | 0.0469444 |
| Gtf2f1_j3     | 0.0470929   | 0.0422213 | -0.157539    | 0.921853  | 1         |
| Gtf2f1_j4     | 0           | 0.144465  | 1.79769e+308 | 0.0287275 | 1         |
| Dennd1c_j6    | 0.0590432   | 0.016684  | -1.82331     | 0.458174  | 1         |
| C3_j1         | 0.0905266   | 0.0558179 | -0.697614    | 0.590487  | 1         |

|             |           |                        |            |           |           |
|-------------|-----------|------------------------|------------|-----------|-----------|
| Gpr108_j4   | 0         | 0.079181               | 0          | 1         | 1         |
| Gpr108_j5   | 0         | 0.276612               | 0          | 1         | 1         |
| Fbxl17_j1   | 16.8675   | 15.1745                | -0.152597  | 0.27989   | 0.628722  |
| Rab31_j3    | 3.36228   | 5.92437                | 0          | 1         | 1         |
| Ralbp1      | 25.7838   | 25.4494                | 0          | 1         | 1         |
| Twsg1_j1    | 0.9615    | 1.009                  | 0.0695671  | 0.802678  | 0.934384  |
| Ndufv2_j2   | 0         | 0.209805               | 0          | 1         | 1         |
| XLOC_014582 | 0.280458  | 0.222956               | -0.331026  | 0.76968   | 0.921491  |
| XLOC_014582 | 0.164402  | 0 -1.79769e+308        |            | 0.0439602 | 0.238753  |
| XLOC_014583 | 0.292146  | 0.217676               | -0.424507  | 0.527285  | 0.80151   |
| Ptprm       | 0.872872  | 1.73751                | 0          | 1         | 1         |
| Myl12b_j1   | 67.4959   | 106.616                | 0          | 1         | 1         |
| Alk_j3      | 0.340969  | 0.406725               | 0.254416   | 0.41245   | 0.731438  |
| Galnt14     | 6.92105   | 5.17871                | -0.418398  | 3.80E-05  | 0.0009459 |
| Xdh_j2      | 0.83396   | 3.23457                | 0          | 1         | 1         |
| Memo1_j6    | 4.18217   | 0.297252               | 0          | 1         | 1         |
| Memo1_j7    | 1.14959   | 1.3168                 | 0          | 1         | 1         |
| AK144664    | 0.201328  | 0.240069               | 0.2539     | 0.729059  | 0.903977  |
| Atl2        | 0.394817  | 0.801941               | 1.02231    | 0.0067495 | 0.0639878 |
| Dhx57_j3    | 6.50935   | 8.26953                | 0          | 1         | 1         |
| Dhx57       | 2.60255   | 2.82077                | 0          | 1         | 1         |
| Map4k3_j4   | 0.326488  | 0.418587               | 0          | 1         | 1         |
| Map4k3_j8   | 0.451372  | 0.45085                | 0          | 1         | 1         |
| XLOC_014636 | 0.104609  | 0.0494793              | -1.08011   | 0.417852  | 1         |
| Cox7a2l_j1  | 58.5527   | 61.1549                | 0          | 1         | 1         |
| XLOC_014640 | 0.117969  | 0.194965               | 0.724814   | 0.360462  | 0.695432  |
| XLOC_014641 | 0.0735732 | 0.0575891              | -0.353384  | 0.78628   | 1         |
| Lrpprc_j6   | 3.88148   | 4.85344                | 0          | 1         | 1         |
| Srbd1       | 0.940293  | 1.19645                | 0.347579   | 0.355618  | 0.691525  |
| Srbd1       | 0         | 0.0763779 1.79769e+308 |            | 0.123125  | 1         |
| XLOC_014653 | 0.209218  | 0.180264               | -0.214899  | 0.731311  | 0.904922  |
| XLOC_014653 | 0.391845  | 0.376197               | -0.0587947 | 0.862273  | 0.956421  |
| XLOC_014658 | 0.0328156 | 0.109902               | 1.74377    | 0.53776   | 1         |
| Lhcgr_j2    | 0.0423966 | 0.292643               | 2.78712    | 0.113692  | 0.419374  |
| Lhcgr_j5    | 0.298655  | 0.075038               | -1.99278   | 0.17108   | 0.507955  |
| Lhcgr_j7    | 0.627914  | 0.565448               | -0.151172  | 0.740932  | 0.909167  |
| Lhcgr_j8    | 0.833399  | 0.692546               | -0.267098  | 0.688935  | 0.88458   |
| Nrxn1_j2    | 3.54462   | 2.11595                | 0          | 1         | 1         |
| Nrxn1_j1    | 2.76855   | 2.19097                | 0          | 1         | 1         |
| Nrxn1_j3    | 0.243629  | 0.383321               | 0          | 1         | 1         |
| Nrxn1_j4    | 2.43699   | 0.000270098            | 0          | 1         | 1         |
| Mettl4_j2   | 1.92987   | 1.81518                | 0          | 1         | 1         |
| Scaf8_j7    | 5.90536   | 5.09155                | 0          | 1         | 1         |
| Tiam2       | 0.246619  | 0.451413               | 0          | 1         | 1         |
| Tiam2       | 0.3279    | 0.13958                | 0          | 1         | 1         |
| Arid1b_j1   | 2.92598   | 2.29457                | 0          | 1         | 1         |
| Zdhhc14_j7  | 10.3329   | 10.7093                | 0.0516114  | 0.737537  | 0.907523  |

|                  |           |           |            |           |           |
|------------------|-----------|-----------|------------|-----------|-----------|
| Snx9_j1          | 0.57293   | 0         | 0          | 1         | 1         |
| Synj2_j1         | 0.140089  | 0.0562766 | 0          | 1         | 1         |
| Gtf2h5_j1        | 41.5049   | 46.345    | 0.15913    | 0.365572  | 0.699478  |
| Tulp4_j5         | 0.342009  | 0.554976  | 0.698389   | 0.0184753 | 0.133474  |
| Dynl1e_j1        | 1.17847   | 0.397445  | 0          | 1         | 1         |
| Sytl3_j2         | 2.25705   | 3.50607   | 0          | 1         | 1         |
| Rps6ka2_j1       | 4.38127   | 2.36856   | 0          | 1         | 1         |
| Rps6ka2_j2       | 0.12735   | 0.0689094 | 0          | 1         | 1         |
| Fgfr1op_j2       | 0.708322  | 0.483149  | -0.551939  | 0.253445  | 0.601477  |
| T2_j1            | 0.244716  | 0.13998   | -0.805894  | 0.103494  | 0.398764  |
| Pde10a_j2        | 0.096961  | 0.0453431 | 0          | 1         | 1         |
| 1700010l14Rik_j4 | 0.195431  | 0.113106  | -0.788989  | 0.423323  | 0.738697  |
| Agpat4_j2        | 2.30727   | 3.2183    | 0          | 1         | 1         |
| AK029100_j1      | 1.0486    | 0.903717  | 0          | 1         | 1         |
| Sod2_j1          | 20.1099   | 18.2702   | -0.138414  | 0.136166  | 0.459207  |
| Mllt4_j2         | 0.253095  | 0.481851  | 0          | 1         | 1         |
| Mllt4_j1         | 0.836389  | 0.652709  | 0          | 1         | 1         |
| 2210404J11Rik_j2 | 1.5425    | 1.39482   | -0.145188  | 0.561821  | 0.821818  |
| Tbp_j1           | 0.143398  | 0.145854  | 0.0245019  | 0.950803  | 0.985823  |
| Lix1_j6          | 0.939002  | 0.580841  | 0          | 1         | 1         |
| XLOC_013822      | 0.0974583 | 0.0942572 | -0.0481819 | 0.961314  | 1         |
| XLOC_013822      | 0.208803  | 0.115443  | -0.854962  | 0.101702  | 0.395032  |
| 4930546H06Rik_j7 | 0.186635  | 0.0887208 | -1.07288   | 0.0267446 | 0.172139  |
| XLOC_013824      | 0.218546  | 0.0727199 | -1.58751   | 0.259959  | 0.608587  |
| XLOC_013825      | 0.138131  | 0.0053848 | -4.681     | 0.0494031 | 0.256438  |
| XLOC_013825      | 0.381541  | 0.390176  | 0.0322872  | 0.93467   | 0.97999   |
| Ppp2r1a_j2       | 116.615   | 116.042   | 0          | 1         | 1         |
| Zfp53_j1         | 0.778697  | 0.705655  | -0.142098  | 0.476857  | 0.772447  |
| Zfp948           | 2.24899   | 1.78997   | 0          | 1         | 1         |
| Zfp758           | 4.03619   | 3.5411    | -0.188799  | 0.142687  | 0.469414  |
| AK079285         | 0.241054  | 0.316091  | 0.390984   | 0.4467    | 0.753504  |
| Srrm2_j3         | 2.37913   | 1.72437   | 0          | 1         | 1         |
| Srrm2_j2         | 0.0499402 | 0.0594519 | 0          | 1         | 1         |
| Srrm2_j7         | 3.23054   | 2.97085   | 0          | 1         | 1         |
| Rnps1_j4         | 5.26128   | 5.22072   | -0.0111631 | 0.958296  | 0.988063  |
| Dci_j3           | 0.422076  | 0.15597   | -1.43624   | 0.293303  | 0.640282  |
| Pkd1_j7          | 0.379708  | 0.320261  | 0          | 1         | 1         |
| Hagh_j3          | 1.68178   | 1.37948   | 0          | 1         | 1         |
| Igfals           | 0.107913  | 0.107795  | -0.0015744 | 0.998263  | 1         |
| Unkl_j4          | 6.19255   | 5.11656   | 0          | 1         | 1         |
| Lmf1             | 1.13002   | 1.08467   | 0          | 1         | 1         |
| Mslnl_j1         | 0.140784  | 0.0552314 | -1.34992   | 0.201935  | 0.545319  |
| Mslnl_j7         | 0.182706  | 0.0467674 | -1.96595   | 0.348755  | 0.686735  |
| Narfl_j1         | 0.245209  | 0.0439163 | -2.48118   | 0.0030602 | 0.0349964 |
| Ccdc78_j3        | 0.189117  | 0.0750406 | -1.33353   | 0.0164336 | 0.122727  |
| Fbxl16_j1        | 19.5305   | 22.9771   | 0          | 1         | 1         |
| Axin1_j2         | 0.39846   | 0.463198  | 0.217193   | 0.58884   | 0.835806  |

|                  |             |                 |             |           |           |
|------------------|-------------|-----------------|-------------|-----------|-----------|
| A930001N09Rik    | 0.97071     | 0.343183        | 0           | 1         | 1         |
| A930001N09Rik_j3 | 0.233384    | 0.423559        | 0           | 1         | 1         |
| Kifc5b_j3        | 0.131074    | 0 -1.79769e+308 | 0.0006431   |           | 1         |
| Kifc5b_j2        | 0.0514344   | 0.0465          | -0.145501   | 0.913064  | 1         |
| Phf1_j2          | 0.221896    | 0.309427        | 0           | 1         | 1         |
| Phf1_j1          | 3.0618      | 2.99055         | 0           | 1         | 1         |
| XLOC_013900      | 1.19907     | 1.42417         | 0           | 1         | 1         |
| XLOC_013900      | 0.41568     | 0.556963        | 0           | 1         | 1         |
| XLOC_013900      | 0.580486    | 0.925484        | 0           | 1         | 1         |
| XLOC_013907      | 0.279154    | 0.23155         | 0           | 1         | 1         |
| Scube3_j6        | 0.0747682   | 0.03875         | -0.948229   | 0.548693  | 1         |
| Ppard_j2         | 1.00678     | 0.920354        | -0.129484   | 0.668064  | 0.874424  |
| Fance            | 0.949259    | 1.21283         | 0.353499    | 0.334648  | 0.675435  |
| Fance_j1         | 0.000357759 | 0.555058        | 10.5994     | 0.768711  | 0.921133  |
| Fance_j3         | 0.148341    | 0.326625        | 1.13872     | 0.154171  | 0.487168  |
| Kctd20           | 3.84931     | 2.21302         | 0           | 1         | 1         |
| Sfrs3_j2         | 2.79797     | 2.30094         | -0.282154   | 0.228965  | 0.576092  |
| Sfrs3_j9         | 0.375449    | 0.143529        | -1.38728    | 0.0299622 | 0.185636  |
| Fgd2_j1          | 0.0690237   | 0 -1.79769e+308 | 0.0054552   |           | 1         |
| Ftsjd2_j2        | 0.265662    | 0.000254091     | -10.03      | 0.474569  | 0.770688  |
| XLOC_013933      | 0.0538388   | 0.026556        | -1.01961    | 0.578506  | 1         |
| Zfand3           | 17.5401     | 17.4286         | -0.00920133 | 0.954737  | 0.986907  |
| Zfand3_j2        | 19.5931     | 21.7437         | 0.150254    | 0.408901  | 0.729112  |
| Dnahc8_j2        | 0.0569622   | 0 -1.79769e+308 | 0.0692388   |           | 1         |
| Pde9a_j1         | 0.0860369   | 0.0437117       | -0.976937   | 0.487068  | 1         |
| Pde9a_j5         | 0.170887    | 0.150906        | -0.179397   | 0.876628  | 0.960779  |
| Pknox1_j1        | 0.55554     | 0.460914        | 0           | 1         | 1         |
| Pknox1_j4        | 0.630612    | 1.03869         | 0           | 1         | 1         |
| Rrp1b_j7         | 0.171595    | 0.19638         | 0.194638    | 0.737234  | 0.907482  |
| Rrp1b_j8         | 0.205752    | 0.0930271       | -1.14518    | 0.13981   | 0.465192  |
| BC048393_j1      | 0.483098    | 0.349408        | -0.467404   | 0.0593169 | 0.286297  |
| Cyp4f15_j1       | 1.67213     | 1.44706         | -0.208564   | 0.223192  | 0.570235  |
| XLOC_013948      | 0.158199    | 0.371086        | 1.23001     | 0.142696  | 0.469414  |
| Adamts10_j3      | 0.505591    | 0.615548        | 0.2839      | 0.336874  | 0.677277  |
| Myo1f_j2         | 0.050897    | 0.0174499       | -1.54436    | 0.29717   | 1         |
| Myo1f            | 0.25337     | 0.584747        | 1.20657     | 6.95E-05  | 0.0015758 |
| Pram1_j3         | 0.984783    | 0.958418        | 0           | 1         | 1         |
| Pram1_j12        | 0.0444596   | 0.0534155       | 0.264763    | 0.861876  | 1         |
| Rgl2_j12         | 1.24077     | 1.42308         | 0.197782    | 0.440702  | 0.749739  |
| Rxrb             | 1.76035     | 1.59332         | -0.143827   | 0.379527  | 0.710908  |
| Rxrb             | 13.0156     | 12.9746         | -0.00455229 | 0.972432  | 0.991962  |
| Col11a2_j5       | 0.644468    | 0.452688        | -0.509592   | 0.0728141 | 0.324707  |
| Tap1_j1          | 2.96294     | 2.45045         | -0.273986   | 0.19764   | 0.540632  |
| Psm8_j1          | 0.13521     | 0.201777        | 0.577562    | 0.565848  | 0.824141  |
| BC051142_j1      | 0.223304    | 0.169693        | -0.39608    | 0.724087  | 0.901852  |
| BC051142_j5      | 0.261749    | 0.281846        | 0.106724    | 0.897932  | 0.967557  |
| Notch4           | 0.332059    | 0.350953        | 0.0798399   | 0.776421  | 0.924432  |

|                  |           |                 |            |           |          |
|------------------|-----------|-----------------|------------|-----------|----------|
| IAP_j6           | 0.0479948 | 0.0420196       | -0.191817  | 0.905333  | 1        |
| Ager_j2          | 5.04001   | 4.67442         | 0          | 1         | 1        |
| Ager_j7          | 0.540234  | 0.425497        | 0          | 1         | 1        |
| Prnt1_j5         | 1.83627   | 1.86427         | 0.0218378  | 0.93995   | 0.981777 |
| Dom3z            | 3.56295   | 4.08792         | 0.198294   | 0.267736  | 0.616423 |
| Rdbp_j1          | 4.77766   | 4.76838         | 0          | 1         | 1        |
| Rdbp_j2          | 2.56398   | 2.3919          | 0          | 1         | 1        |
| XLOC_013989      | 0.484464  | 0.0512668       | -3.24029   | 0.320355  | 0.66367  |
| Ehmt2_j3         | 0.523912  | 0.271836        | 0          | 1         | 1        |
| Vars_j1          | 0.160584  | 0               | 0          | 1         | 1        |
| D17H6S56E-3_j3   | 0.337208  | 0.251933        | 0          | 1         | 1        |
| D17H6S56E-3_j10  | 6.6582    | 4.12516         | 0          | 1         | 1        |
| Ddah2_j5         | 0.359966  | 0.17499         | 0          | 1         | 1        |
| Abhd16a_j1       | 0.245038  | 0 -1.79769e+308 | 0.0037147  | 0.0407099 |          |
| Ltb              | 0.304189  | 0.326364        | 0.101515   | 0.86222   | 0.956421 |
| Atp6v1g2         | 39.5253   | 38.326          | -0.0444511 | 0.637427  | 0.8596   |
| Bat1a_j2         | 17.7999   | 23.2147         | 0          | 1         | 1        |
| Bat1a_j3         | 24.6052   | 27.2133         | 0          | 1         | 1        |
| H2-D1_j3         | 17.7598   | 19.8431         | 0.160023   | 0.160741  | 0.495357 |
| Mdc1             | 1.19712   | 0.884805        | 0          | 1         | 1        |
| Mdc1_j1          | 0.924902  | 1.1794          | 0          | 1         | 1        |
| Gnl1_j2          | 0.194233  | 0.379014        | 0          | 1         | 1        |
| Gm6034_j1        | 0.460555  | 0.0483958       | 0          | 1         | 1        |
| 3110082D06Rik_j1 | 0.119591  | 0.0736563       | -0.699226  | 0.5417    | 1        |
| Pla2g7_j5        | 0.716473  | 0.322211        | 0          | 1         | 1        |
| Rcan2_j1         | 0.231393  | 0.162685        | 0          | 1         | 1        |
| Clic5_j1         | 0.0643352 | 0.103586        | 0.687152   | 0.32688   | 1        |
| Clic5_j3         | 0.106676  | 0.00354205      | -4.9125    | 0.0829969 | 1        |
| B230354K17Rik_j2 | 0.207585  | 0.193026        | -0.104905  | 0.83044   | 0.945392 |
| XLOC_014054      | 0.126935  | 0.0509243       | -1.31766   | 0.479181  | 1        |
| Aars2_j2         | 2.54915   | 2.72869         | 0.0981888  | 0.642955  | 0.862213 |
| AK080425_j1      | 0.224977  | 0.0979959       | -1.19898   | 0.28115   | 0.629634 |
| AK080425_j2      | 0.162834  | 0.030324        | -2.42487   | 0.154346  | 0.487404 |
| Gtpbp2_j3        | 6.75335   | 7.97505         | 0          | 1         | 1        |
| Gm88_j1          | 1.02814   | 0.63508         | -0.695026  | 0.155339  | 0.488418 |
| Zfp318_j1        | 0.768938  | 1.52497         | 0          | 1         | 1        |
| Mea1             | 0.432841  | 0.452788        | 0.0650006  | 0.812826  | 0.938836 |
| XLOC_014072      | 0.224524  | 0.171623        | 0          | 1         | 1        |
| Trerf1_j1        | 0.161077  | 0 -1.79769e+308 | 2.01E-08   | 1.33E-06  |          |
| Mrps10           | 1.29602   | 1.35793         | 0          | 1         | 1        |
| Tcfep_j2         | 0.0662386 | 0 -1.79769e+308 | 0.0791515  | 1         |          |
| Tcfep_j3         | 0.067895  | 0.0317574       | -1.09621   | 0.61048   | 1        |
| XLOC_014082      | 0.0901686 | 0.0236421       | -1.93127   | 0.413698  | 1        |
| Lrfn2_j2         | 2.896     | 2.45923         | 0          | 1         | 1        |
| XLOC_014088      | 0.271152  | 0.093274        | 0          | 1         | 1        |
| Kif6_j1          | 0.174366  | 0.207599        | 0.251682   | 0.73022   | 0.904705 |
| XLOC_014093      | 0.186912  | 0.103027        | -0.859332  | 0.494892  | 0.782608 |

|              |           |                 |            |           |           |
|--------------|-----------|-----------------|------------|-----------|-----------|
| Rab5a_j1     | 16.2485   | 16.2815         | 0          | 1         | 1         |
| Kat2b_j2     | 0.433561  | 0.264378        | -0.713629  | 0.205393  | 0.549744  |
| XLOC_014098  | 0.14812   | 0.113789        | -0.380401  | 0.543689  | 0.811058  |
| Zfp959_j2    | 0.416948  | 0.525008        | 0.332471   | 0.501144  | 0.785318  |
| Zfp959_j9    | 0.212309  | 0.123293        | -0.784073  | 0.296279  | 0.643078  |
| Ebi3         | 0.215003  | 0.165846        | -0.374514  | 0.675289  | 0.877609  |
| Shd_j2       | 1.67589   | 1.44252         | -0.216331  | 0.494435  | 0.782504  |
| Shd_j1       | 3.01524   | 2.80601         | -0.103754  | 0.656451  | 0.868961  |
| Mpnd_j4      | 0.875969  | 0.903611        | 0.0448216  | 0.826973  | 0.94428   |
| Mpnd_j8      | 0.0498504 | 0 -1.79769e+308 |            | 0.0273982 | 1         |
| Hdgfrp2      | 5.91226   | 5.81835         | 0          | 1         | 1         |
| Kdm4b_j1     | 0.661249  | 0.518055        | -0.352089  | 0.206415  | 0.550935  |
| Kdm4b_j2     | 1.23584   | 1.24418         | 0.00970399 | 0.96022   | 0.988644  |
| Safb_j2      | 0.689806  | 0.761041        | 0          | 1         | 1         |
| Ndufa11_j2   | 91.0094   | 89.9231         | -0.0173239 | 0.892569  | 0.966031  |
| XLOC_014123  | 0.15916   | 0.263908        | 0.729558   | 0.233944  | 0.581359  |
| Trip10_j2    | 1.28226   | 0.790899        | 0          | 1         | 1         |
| Trip10       | 4.32337   | 3.25658         | 0          | 1         | 1         |
| Trip10_j4    | 0.577412  | 0.0631466       | 0          | 1         | 1         |
| Trip10_j7    | 0.0922132 | 0.0637231       | 0          | 1         | 1         |
| Vav1_j3      | 0.120725  | 0.315823        | 1.3874     | 0.121012  | 0.433109  |
| Cntnap5c_j8  | 0.136742  | 0 -1.79769e+308 |            | 0.0032966 | 1         |
| Cntnap5c_j12 | 0.122615  | 0.106786        | -0.199412  | 0.776303  | 1         |
| Fert2_j2     | 0.308142  | 0.177534        | 0          | 1         | 1         |
| Fert2_j3     | 0.292642  | 0.42906         | 0          | 1         | 1         |
| Fert2_j1     | 0.153818  | 0.133277        | 0          | 1         | 1         |
| Fert2_j8     | 0.296231  | 0.146216        | 0          | 1         | 1         |
| Ppp4r1_j3    | 1.52565   | 0.0123587       | 0          | 1         | 1         |
| Ppp4r1_j7    | 3.27782   | 2.6973          | 0          | 1         | 1         |
| XLOC_014134  | 0.205938  | 0.161672        | -0.34914   | 0.422593  | 0.738516  |
| Ddx11_j3     | 0.0480748 | 0.112173        | 1.22237    | 0.154648  | 1         |
| Ddx11_j5     | 0.165743  | 0 -1.79769e+308 |            | 3.62E-06  | 0.0001277 |
| Ddx11_j9     | 0.176795  | 0.137045        | -0.367426  | 0.606847  | 0.845177  |
| XLOC_014140  | 0.0549333 | 0 -1.79769e+308 |            | 0.0121989 | 1         |
| XLOC_014140  | 0.107921  | 0.000259809     | -8.69831   | 0.769556  | 1         |
| Lama1_j1     | 0.0605242 | 0 -1.79769e+308 |            | 8.84E-05  | 1         |
| L3mbtl4_j8   | 0.257909  | 0.0526482       | -2.2924    | 0.0287927 | 0.180641  |
| XLOC_014144  | 0.186131  | 0.0906564       | -1.03783   | 0.0581942 | 0.2832    |
| Epb4.1l3_j1  | 22.8559   | 18.2017         | 0          | 1         | 1         |
| Fam179a_j2   | 0.182713  | 0.0690628       | -1.4036    | 0.110642  | 0.413936  |
| Fam179a_j4   | 0.380302  | 0.227746        | -0.739721  | 0.134887  | 0.457099  |
| Clip4_j4     | 2.72867   | 1.62595         | 0          | 1         | 1         |
| Clip4_j6     | 1.09445   | 0.831996        | 0          | 1         | 1         |
| Lclat1       | 9.36409   | 8.96487         | 0          | 1         | 1         |
| Ttc27_j2     | 1.31553   | 1.8453          | 0          | 1         | 1         |
| Ltbp1_j8     | 0.0845775 | 0.000281333     | 0          | 1         | 1         |
| Ltbp1_j11    | 0.114365  | 0.196338        | 0          | 1         | 1         |

|                |           |             |               |           |           |
|----------------|-----------|-------------|---------------|-----------|-----------|
| Rasgrp3_j1     | 0.156394  | 0           | -1.79769e+308 | 1.39E-05  | 0.0004098 |
| Crim1_j2       | 0.0727556 | 0           | -1.79769e+308 | 0.0018341 | 1         |
| Fam82a1_j2     | 0.30414   | 0.000357716 | -9.7317       | 0.667938  | 0.87439   |
| Fam82a1_j9     | 1.87447   | 2.02462     | 0.11117       | 0.643531  | 0.862499  |
| Gemin6         | 0.495068  | 0.66407     | 0.423708      | 0.456699  | 0.760049  |
| Arhgef33_j1    | 0.129118  | 0.0804144   | -0.683168     | 0.477152  | 1         |
| Plekhh2_j3     | 0.0751833 | 0.000126103 | -9.21966      | 0.792544  | 1         |
| Prkce_j2       | 0.983307  | 0.244995    | 0             | 1         | 1         |
| Rhoq_j2        | 0.109667  | 0           | -1.79769e+308 | 0.0009871 | 1         |
| Rhoq_j4        | 0.659868  | 1.78754     | 1.43772       | 7.25E-08  | 4.08E-06  |
| Socs5_j1       | 1.02715   | 0.755631    | -0.442888     | 0.120694  | 0.432701  |
| XLOC_014203    | 0.0965701 | 0.0518875   | -0.896189     | 0.505501  | 1         |
| XLOC_014209    | 0.145607  | 0.0485962   | -1.58316      | 0.457537  | 0.760484  |
| Ston1_j5       | 0.0509513 | 0           | 0             | 1         | 1         |
| Adcyap1_j2     | 1.44758   | 2.5819      | 0             | 1         | 1         |
| Pisd-ps2_j7    | 1.8751    | 1.78038     | -0.0747892    | 0.725425  | 0.902457  |
| Pisd-ps2_j8    | 0.150727  | 0.0666902   | -1.17639      | 0.163582  | 0.498858  |
| Tfb1m_j4       | 1.16502   | 0           | 0             | 1         | 1         |
| Serac1         | 1.13027   | 1.18496     | 0             | 1         | 1         |
| BC049966_j8    | 0.0469822 | 0.0934711   | 0             | 1         | 1         |
| BC049966_j7    | 0.704057  | 0.0264651   | 0             | 1         | 1         |
| Tmem181c-ps_j1 | 1.08389   | 0           | -1.79769e+308 | 2.07E-10  | 1.96E-08  |
| AK178082_j2    | 4.95622   | 3.56321     | -0.476065     | 0.105394  | 0.403245  |
| Dynlt1e_j2     | 0.748292  | 0.551041    | -0.441442     | 0.543002  | 0.810636  |
| Ezr_j2         | 9.82534   | 12.3813     | 0             | 1         | 1         |
| Fndc1_j6       | 0.0514609 | 0.0235083   | -1.13031      | 0.40864   | 1         |
| Pacrg_j2       | 5.14761   | 4.8868      | -0.0750101    | 0.73328   | 0.905846  |
| Map3k4_j1      | 1.46626   | 1.69054     | 0             | 1         | 1         |
| Slc22a3_j2     | 0.0653542 | 0           | -1.79769e+308 | 0.0135188 | 1         |
| Slc22a3        | 0.289467  | 0.00310031  | -6.54484      | 0.135407  | 0.45783   |
| Igf2r_j2       | 0.332775  | 0.229292    | 0             | 1         | 1         |
| Acat2_j2       | 0.176166  | 0.266615    | 0.597819      | 0.307809  | 0.652824  |
| Wtap_j2        | 3.54652   | 4.30063     | 0             | 1         | 1         |
| Wtap_j3        | 1.56158   | 1.65203     | 0             | 1         | 1         |
| BC068229_j2    | 0.109661  | 0.10575     | -0.0523886    | 0.949774  | 1         |
| Wdr27_j1       | 0.120666  | 0.114839    | -0.0714098    | 0.920941  | 1         |
| AK004434       | 0.299613  | 0.375687    | 0             | 1         | 1         |
| AK004434_j1    | 0.245854  | 0           | 0             | 1         | 1         |
| Phf10_j2       | 2.43243   | 2.59328     | 0             | 1         | 1         |
| Psemb1_j3      | 23.1624   | 29.864      | 0.366618      | 0.0245509 | 0.16231   |
| Prdm9          | 0.228473  | 0.245114    | 0.101431      | 0.815455  | 0.939924  |
| Prdm9_j9       | 0.061915  | 0           | -1.79769e+308 | 0.0069296 | 1         |
| Lnpep_j1       | 19.9467   | 16.8125     | 0             | 1         | 1         |
| Gm4769_j1      | 1.20705   | 1.05275     | -0.197312     | 0.476401  | 0.772093  |
| Gm4769_j2      | 0.901507  | 1.04359     | 0.211143      | 0.42666   | 0.741282  |
| Zfp40_j3       | 1.66265   | 1.95831     | 0             | 1         | 1         |
| Zfp40_j5       | 1.46989   | 0.940868    | 0             | 1         | 1         |



|                  |           |                 |            |           |           |
|------------------|-----------|-----------------|------------|-----------|-----------|
| Zfp213_j1        | 0.172737  | 0.307862        | 0.833705   | 0.0828114 | 0.350783  |
| Mmp25_j4         | 0.82664   | 0.187269        | 0          | 1         | 1         |
| Mmp25_j5         | 3.48148   | 2.5387          | 0          | 1         | 1         |
| Thoc6_j4         | 0.220401  | 0.402272        | 0.868043   | 0.0432003 | 0.235866  |
| AK047830_j4      | 0.0623694 | 0.0708058       | 0.183031   | 0.89845   | 1         |
| Flywch1_j4       | 67.4128   | 73.1811         | 0          | 1         | 1         |
| Pdpk1_j1         | 11.935    | 11.9093         | 0          | 1         | 1         |
| Tbc1d24_j9       | 0.0598077 | 0 -1.79769e+308 |            | 0.0001983 | 1         |
| Tbc1d24_j10      | 0.12296   | 0.208333        | 0.760703   | 0.0474153 | 0.250081  |
| Tbc1d24_j11      | 0.0735471 | 0 -1.79769e+308 |            | 6.76E-06  | 1         |
| 1600002H07Rik_j1 | 1.97186   | 1.67839         | -0.232478  | 0.366611  | 0.700205  |
| Ccnf_j1          | 0.0438764 | 0.0716386       | 0.707293   | 0.462696  | 1         |
| Abca17_j6        | 0.181192  | 0 -1.79769e+308 |            | 0.0002618 | 0.0047884 |
| Dnase1l2_j1      | 0.292448  | 0.2319          | -0.334678  | 0.682501  | 0.880856  |
| E4f1_j10         | 2.58221   | 2.48592         | -0.0548286 | 0.740701  | 0.909129  |
| E4f1_j9          | 0.128863  | 0.135558        | 0.0730671  | 0.912936  | 1         |
| E4f1_j8          | 0.505699  | 0.581711        | 0.202024   | 0.539913  | 0.808719  |
| AK014798         | 9.75159   | 13.7023         | 0.490706   | 1.47E-05  | 0.0004315 |
| Mlst8_j1         | 0.0941222 | 0.153586        | 0          | 1         | 1         |
| Traf7            | 2.08925   | 2.07737         | 0          | 1         | 1         |
| Traf7_j1         | 0.973312  | 0.599299        | 0          | 1         | 1         |
| Tsc2             | 6.85062   | 6.09607         | 0          | 1         | 1         |
| Tbl3_j4          | 0.528032  | 0.570138        | 0          | 1         | 1         |
| Tbl3_j6          | 4.05445   | 5.28116         | 0          | 1         | 1         |
| Mapk8ip3_j7      | 8.09598   | 8.11802         | 0          | 1         | 1         |
| Mapk8ip3_j6      | 48.7842   | 46.566          | 0          | 1         | 1         |
| Cramp1l_j4       | 1.87145   | 2.53364         | 0          | 1         | 1         |
| Cramp1l_j5       | 1.7077    | 1.27262         | 0          | 1         | 1         |
| Cramp1l_j2       | 1.72817   | 1.57489         | 0          | 1         | 1         |
| Gnptg_j1         | 10.7442   | 10.5085         | 0          | 1         | 1         |
| Chtf18_j3        | 0.0366698 | 0.0648111       | 0.821648   | 0.495795  | 1         |
| Haghl            | 0.345592  | 0.637283        | 0.882863   | 0.0479591 | 0.251778  |
| Haghl_j2         | 10.051    | 7.76937         | -0.37147   | 0.0058459 | 0.0573395 |
| Fam173a          | 15.5545   | 15.5806         | 0.00241691 | 0.985633  | 0.995707  |
| Fam173a_j1       | 6.41577   | 6.08538         | -0.0762754 | 0.546674  | 0.813153  |
| Rhot2_j4         | 0.12276   | 0.0440411       | -1.47892   | 0.0364678 | 1         |
| Rhot2_j3         | 0.508804  | 0.678821        | 0.415922   | 0.0888671 | 0.365281  |
| Wdr90_j9         | 0.0708553 | 0.0765554       | 0.111629   | 0.845958  | 1         |
| Pdia2_j1         | 0.0974763 | 0 -1.79769e+308 |            | 0.0060566 | 1         |
| Itfg3_j4         | 2.53399   | 2.49964         | 0          | 1         | 1         |
| Itfg3_j2         | 0.0582145 | 0.0457642       | 0          | 1         | 1         |
| Itfg3_j3         | 0.719809  | 0.670218        | 0          | 1         | 1         |
| Bak1_j5          | 0.619616  | 0.428624        | -0.53166   | 0.165616  | 0.502238  |
| 2900010M23Rik_j1 | 4.81556   | 5.43367         | 0          | 1         | 1         |
| Lemd2_j1         | 5.4458    | 8.02987         | 0          | 1         | 1         |
| Lemd2_j2         | 1.11373   | 1.27205         | 0          | 1         | 1         |
| AK036033_j2      | 0.0393617 | 0.115637        | 1.55474    | 0.178985  | 1         |

|             |           |                 |           |           |           |
|-------------|-----------|-----------------|-----------|-----------|-----------|
| AK036033_j4 | 0.0839653 | 0.144821        | 0.786405  | 0.322133  | 1         |
| Nudt3_j8    | 0.369326  | 0.130155        | 0         | 1         | 1         |
| Nudt3_j9    | 0.108877  | 0.0469284       | 0         | 1         | 1         |
| Taf11       | 5.42282   | 5.42796         | 0         | 1         | 1         |
| Fkbp5_j2    | 2.60558   | 2.74787         | 0.0767113 | 0.719692  | 0.899338  |
| Slc26a8_j7  | 0.0996009 | 0 -1.79769e+308 |           | 0.0016186 | 1         |
| Slc26a8_j6  | 0.125868  | 0.00929899      | -3.75869  | 0.0884032 | 1         |
| Slc26a8_j5  | 0.057981  | 0 -1.79769e+308 |           | 0.0199324 | 1         |
| Slc26a8_j19 | 0.137203  | 0.0513832       | -1.41694  | 0.232354  | 0.57939   |
| Cpne5       | 0.937245  | 1.35123         | 0         | 1         | 1         |
| XLOC_014368 | 0.45681   | 0.0758314       | -2.59073  | 0.325637  | 0.668942  |
| Mdga1_j5    | 2.28346   | 4.32074         | 0         | 1         | 1         |
| Btbd9_j1    | 0.905407  | 0.413035        | 0         | 1         | 1         |
| Wdr4        | 0.399119  | 0.50269         | 0         | 1         | 1         |
| Cbs_j1      | 0.127801  | 0.0795709       | -0.683588 | 0.371907  | 1         |
| U2af1_j6    | 2.06259   | 1.87735         | -0.135756 | 0.646112  | 0.863528  |
| U2af1_j5    | 1.79647   | 2.22401         | 0.307995  | 0.258571  | 0.607374  |
| Notch3_j8   | 0.138175  | 0.00416675      | -5.05143  | 0.133073  | 0.454034  |
| Brd4_j6     | 0.32617   | 0 -1.79769e+308 |           | 8.06E-12  | 1.01E-09  |
| Akap8l_j7   | 4.14536   | 3.83365         | -0.112778 | 0.381938  | 0.712127  |
| Akap8l_j12  | 6.26357   | 5.27753         | -0.247123 | 0.120844  | 0.432986  |
| Wiz_j6      | 6.81671   | 7.17901         | 0.074709  | 0.590549  | 0.836658  |
| Wiz_j7      | 1.57173   | 1.8965          | 0.270991  | 0.2033    | 0.547229  |
| Wiz_j8      | 1.07158   | 0.883861        | -0.277847 | 0.27473   | 0.623768  |
| Wiz_j10     | 0.598955  | 0.539248        | -0.151498 | 0.637339  | 0.85954   |
| Zfp871      | 0.427124  | 0.33964         | 0         | 1         | 1         |
| Zfp870_j4   | 1.00428   | 0.852229        | -0.236842 | 0.409268  | 0.729612  |
| Cyp4f13_j3  | 1.48288   | 1.16624         | -0.346542 | 0.291555  | 0.638573  |
| Cyp4f13_j6  | 1.08292   | 0.484449        | -1.16051  | 0.0099403 | 0.0853084 |
| Zfp101_j4   | 0.523219  | 0.285613        | -0.873353 | 0.0966713 | 0.384045  |
| Zfp101_j5   | 0.390223  | 0.0712686       | -2.45296  | 0.01002   | 0.0856751 |
| Rab11b_j1   | 1.08076   | 0.83883         | -0.365591 | 0.0555225 | 0.27529   |
| Rab11b_j4   | 0.381139  | 0.238655        | -0.675393 | 0.0468388 | 0.24825   |
| Rab11b_j3   | 0.344709  | 0.391656        | 0.184209  | 0.534593  | 0.805759  |
| Angptl4_j1  | 0.907287  | 0.214003        | -2.08393  | 0.0079645 | 0.0722989 |
| Rps18_j1    | 1.98998   | 1.54784         | 0         | 1         | 1         |
| Ring1_j2    | 4.36066   | 5.19927         | 0         | 1         | 1         |
| Ring1_j3    | 4.73922   | 5.12069         | 0         | 1         | 1         |
| H2-Ke6_j5   | 20.9312   | 24.0338         | 0.199413  | 0.0481461 | 0.252487  |
| Brd2_j1     | 0.700524  | 0.0588926       | 0         | 1         | 1         |
| Btnl5       | 0.14921   | 0.114256        | -0.385072 | 0.547985  | 0.813959  |
| Btnl6_j5    | 0.0498902 | 0.0534737       | 0.100073  | 0.928914  | 1         |
| Btnl6_j3    | 0.0744027 | 0 -1.79769e+308 |           | 0.0040299 | 1         |
| Btnl6_j4    | 0.105661  | 0 -1.79769e+308 |           | 0.0005807 | 1         |
| Egfl8_j3    | 0.186868  | 0.219397        | 0.23153   | 0.517708  | 0.795965  |
| C4a_j2      | 3.80572   | 4.8364          | 0         | 1         | 1         |
| Stk19_j2    | 2.50718   | 2.20307         | 0         | 1         | 1         |

|                  |           |                 |            |           |          |
|------------------|-----------|-----------------|------------|-----------|----------|
| Skiv2l_j8        | 1.14962   | 1.41077         | 0          | 1         | 1        |
| Skiv2l           | 6.50105   | 5.8854          | 0          | 1         | 1        |
| D17H6S56E-5      | 0.494476  | 0.633491        | 0.357423   | 0.255794  | 0.604561 |
| Msh5_j1          | 0.115336  | 0.0476422       | -1.27553   | 0.323447  | 1        |
| Ly6g6d_j1        | 0.138309  | 7.22E-05        | -10.9033   | 0.980899  | 0.994152 |
| Prrc2a_j3        | 1.49746   | 1.62589         | 0          | 1         | 1        |
| Prrc2a_j5        | 0.115317  | 0               | 0          | 1         | 1        |
| Prrc2a_j4        | 0.22624   | 0.12598         | 0          | 1         | 1        |
| Aif1_j2          | 0.124131  | 0.159802        | 0.364421   | 0.708374  | 0.893803 |
| Lst1             | 0.761784  | 1.41006         | 0.888298   | 0.0183952 | 0.133078 |
| Ddr1_j6          | 2.65501   | 3.68284         | 0          | 1         | 1        |
| 2310061I04Rik_j1 | 41.7675   | 38.5952         | 0          | 1         | 1        |
| 2310061I04Rik    | 7.06808   | 6.18291         | 0          | 1         | 1        |
| Atat1_j4         | 0.508287  | 0.505905        | 0          | 1         | 1        |
| Atat1_j6         | 1.66424   | 1.40039         | 0          | 1         | 1        |
| Atat1_j5         | 0         | 0.385693        | 0          | 1         | 1        |
| Mrps18b          | 10.7276   | 12.053          | 0          | 1         | 1        |
| H2-T9_j3         | 2.58755   | 2.86123         | 0          | 1         | 1        |
| H2-T10_j1        | 4.62973   | 4.95023         | 0          | 1         | 1        |
| Trim39_j1        | 1.32574   | 1.6711          | 0          | 1         | 1        |
| Trim39_j2        | 2.95637   | 3.14661         | 0          | 1         | 1        |
| H2-M1_j3         | 0.119993  | 0 -1.79769e+308 | 0.0384396  |           | 1        |
| Ppp1r11_j5       | 0.237104  | 13.6923         | 0          | 1         | 1        |
| H2-M5_j2         | 0.118604  | 0.0917879       | -0.36978   | 0.680493  | 1        |
| Cd2ap_j5         | 0.206688  | 0.000271664     | -9.57142   | 0.51937   | 0.797033 |
| AK132380         | 0.0902437 | 0.0541614       | -0.736562  | 0.572107  | 1        |
| XLOC_014477      | 0.111318  | 0.0311495       | -1.8374    | 0.293691  | 1        |
| Slc25a27_j3      | 4.42277   | 4.10058         | -0.109123  | 0.450257  | 0.756025 |
| Enpp4_j2         | 2.91386   | 3.99544         | 0          | 1         | 1        |
| Cdc5l_j6         | 0.432699  | 0.530742        | 0.294645   | 0.515687  | 0.794419 |
| Cdc5l_j5         | 0.355883  | 0.146025        | -1.28519   | 0.0919398 | 0.372879 |
| Spats1_j1        | 0.295326  | 0.156713        | -0.914178  | 0.0461768 | 0.246295 |
| Tmem151b_j3      | 8.4469    | 5.88546         | 0          | 1         | 1        |
| Slc29a1_j1       | 0.638549  | 0.000926519     | -9.42876   | 0.724483  | 0.901947 |
| Slc29a1_j4       | 0.289078  | 0.173174        | -0.739235  | 0.346454  | 0.685483 |
| Slc29a1          | 1.85544   | 0 -1.79769e+308 | 5.46E-20   | 1.53E-17  |          |
| Gm7325           | 0.186936  | 0.177969        | -0.0709176 | 0.948448  | 0.985052 |
| Capn11_j1        | 0.140852  | 0 -1.79769e+308 | 0.0286673  | 0.180203  |          |
| Capn11_j4        | 0.0710776 | 0.011775        | -2.59367   | 0.174611  | 1        |
| Tmem63b_j1       | 0.112774  | 0.014635        | 0          | 1         | 1        |
| Vegfa            | 4.24546   | 3.43361         | 0          | 1         | 1        |
| Abcc10_j4        | 0.679568  | 0.565089        | -0.266139  | 0.285941  | 0.63471  |
| Klc4             | 1.4455    | 1.54514         | 0          | 1         | 1        |
| Cnpy3_j1         | 1.20631   | 1.03065         | -0.227047  | 0.275155  | 0.624239 |
| Cnpy3_j2         | 1.92961   | 1.70393         | -0.179439  | 0.539219  | 0.808383 |
| Ubr2_j1          | 0.499487  | 0.0807606       | 0          | 1         | 1        |
| Prickle4_j1      | 10.4098   | 9.38948         | -0.14882   | 0.211221  | 0.555994 |

|                  |           |                 |            |           |           |
|------------------|-----------|-----------------|------------|-----------|-----------|
| Foxp4_j1         | 0.249604  | 0.0360908       | 0          | 1         | 1         |
| Nfya_j3          | 0.93928   | 1.38984         | 0          | 1         | 1         |
| XLOC_014524      | 0.336221  | 0.204613        | 0          | 1         | 1         |
| Rftn1_j1         | 0.113464  | 0 -1.79769e+308 | 0.0010123  |           | 1         |
| Satb1            | 4.72791   | 4.1462          | 0          | 1         | 1         |
| Pot1b_j6         | 0.259293  | 0.464135        | 0.839959   | 0.131259  | 0.451034  |
| Pot1b_j1         | 0.167757  | 0.166137        | -0.0139985 | 0.982453  | 0.994652  |
| Pot1b_j2         | 0.069721  | 0 -1.79769e+308 | 0.0077008  |           | 1         |
| Zfp119_j4        | 0.31962   | 0.208303        | -0.617674  | 0.486532  | 0.777676  |
| Zfp119b_j1       | 0.410637  | 0 -1.79769e+308 | 7.51E-07   |           | 3.25E-05  |
| Stap2_j2         | 0.202597  | 0.0901652       | -1.16797   | 0.231804  | 0.57883   |
| Stap2_j1         | 0.250727  | 0.230182        | -0.123346  | 0.844155  | 0.950736  |
| Dpp9_j3          | 1.63825   | 1.33417         | 0          | 1         | 1         |
| Dpp9             | 6.15935   | 6.27675         | 0          | 1         | 1         |
| Safb2_j2         | 0.940032  | 0.885787        | 0          | 1         | 1         |
| Rfx2_j1          | 0.142304  | 0.027601        | -2.36618   | 0.0543522 | 0.271922  |
| Khsrp_j5         | 5.92928   | 6.10767         | 0          | 1         | 1         |
| Khsrp            | 8.87923   | 9.33587         | 0          | 1         | 1         |
| Slc25a23_j1      | 5.27472   | 5.40298         | 0          | 1         | 1         |
| Dennd1c_j9       | 0.104579  | 0.0756761       | -0.466689  | 0.744315  | 1         |
| C3_j3            | 0.188185  | 0.309571        | 0.718121   | 1         | 1         |
| Gpr108_j3        | 0.213592  | 0.112578        | 0          | 1         | 1         |
| Efna5_j2         | 0.0942154 | 0               | 0          | 1         | 1         |
| Rab31_j1         | 0.379731  | 0               | 0          | 1         | 1         |
| Ankrd12_j3       | 0.225179  | 0.177188        | -0.345793  | 0.64695   | 0.863936  |
| XLOC_014584      | 0.154892  | 0.0439104       | -1.81863   | 0.0198046 | 0.13987   |
| 1110012J17Rik_j1 | 0.206313  | 0 -1.79769e+308 | 2.15E-08   |           | 1.40E-06  |
| Ptprm_j3         | 3.6199    | 1.70846         | 0          | 1         | 1         |
| Ptprm_j4         | 0.245374  | 0               | 0          | 1         | 1         |
| Arhgap28_j3      | 3.13461   | 3.62427         | 0          | 1         | 1         |
| Arhgap28_j5      | 0.102037  | 0               | 0          | 1         | 1         |
| XLOC_014592      | 0.221453  | 0 -1.79769e+308 | 0.0197857  |           | 0.139811  |
| Tgif1_j1         | 0.239453  | 0.112501        | -1.0898    | 0.239988  | 0.587388  |
| Emilin2_j1       | 0.0926633 | 0 -1.79769e+308 | 0.0353168  |           | 1         |
| Smchd1_j1        | 2.6605    | 2.35439         | 0          | 1         | 1         |
| Ndc80_j1         | 0.0708719 | 0 -1.79769e+308 | 0.0254919  |           | 1         |
| Alk_j5           | 0.0543224 | 0 -1.79769e+308 | 0.0293447  |           | 1         |
| Galnt14_j1       | 1.60558   | 0.814657        | -0.978827  | 2.95E-06  | 0.0001074 |
| Galnt14_j2       | 0.603494  | 1.20258         | 0.994719   | 3.67E-06  | 0.0001293 |
| Galnt14_j4       | 10.0526   | 8.34583         | -0.268448  | 0.120827  | 0.432986  |
| Memo1_j10        | 1.89731   | 4.53282         | 0          | 1         | 1         |
| Memo1_j5         | 13.0476   | 14.1184         | 0          | 1         | 1         |
| Atl2_j1          | 0.454931  | 0.0373009       | -3.60836   | 0.0009335 | 0.0135263 |
| Hnrpl_j2         | 10.0592   | 10.2905         | 0.0327912  | 0.825497  | 0.943705  |
| Map4k3_j9        | 0.100789  | 0               | 0          | 1         | 1         |
| Map4k3_j10       | 0.0763985 | 0               | 0          | 1         | 1         |
| Thumpd2_j4       | 0.2916    | 0.178252        | -0.710073  | 0.288576  | 0.636306  |

|                  |             |                       |            |           |           |
|------------------|-------------|-----------------------|------------|-----------|-----------|
| XLOC_014635      | 0.0771614   | 0.163056              | 1.07942    | 0.100061  | 0.391665  |
| XLOC_014637      | 0.219652    | 0.139028              | 0          | 1         | 1         |
| XLOC_014639      | 0.101384    | 0 -1.79769e+308       |            | 0.0265904 | 1         |
| XLOC_014639      | 0.20423     | 0.137489              | -0.570872  | 0.251958  | 0.599992  |
| Kcng3_j1         | 1.70213     | 1.42769               | 0          | 1         | 1         |
| Lrpprc_j4        | 0.0957151   | 0.00680738            | 0          | 1         | 1         |
| Lrpprc_j5        | 3.58542     | 0                     | 0          | 1         | 1         |
| Srbd1_j2         | 0.606002    | 0 -1.79769e+308       |            | 4.11E-08  | 2.48E-06  |
| Calm2_j1         | 442.885     | 393.998               | -0.168743  | 0.059947  | 0.288253  |
| Fbxo11           | 1.28027     | 1.21314               | 0          | 1         | 1         |
| Fbxo11_j1        | 0.662177    | 0.523239              | 0          | 1         | 1         |
| Lhcgr            | 0.996483    | 0.846229              | -0.235797  | 0.207916  | 0.552233  |
| Lhcgr_j4         | 0.285893    | 0.118289              | -1.27317   | 0.0119687 | 0.0980041 |
| Nrxn1_j6         | 1.0522      | 0.20582               | 0          | 1         | 1         |
| Nrxn1_j5         | 0.248182    | 0.419253              | 0          | 1         | 1         |
| XLOC_014665      | 0.248002    | 0.325058              | 0.390344   | 0.595969  | 0.839157  |
| 2610044015Rik_j1 | 7.20299     | 4.63019               | 0          | 1         | 1         |
| Scaf8_j6         | 0.0204741   | 1.10033               | 0          | 1         | 1         |
| Scaf8_j8         | 1.54183     | 1.05911               | 0          | 1         | 1         |
| XLOC_013763      | 0.154864    | 0.0914164             | -0.760473  | 0.469236  | 0.767424  |
| Zdhhc14_j3       | 0           | 0.308339 1.79769e+308 |            | 0.11875   | 0.428794  |
| Snx9_j2          | 0           | 1.02949               | 0          | 1         | 1         |
| Synj2_j2         | 0.19561     | 0.207792              | 0          | 1         | 1         |
| Synj2            | 0.227489    | 0.155485              | 0          | 1         | 1         |
| Synj2_j5         | 3.21434     | 2.39375               | 0          | 1         | 1         |
| Tulp4_j4         | 3.56723     | 3.53977               | -0.0111504 | 0.924817  | 0.976561  |
| AK178082_j1      | 0           | 1.01701               | 0          | 1         | 1         |
| Sft2d1_j1        | 7.08682     | 7.37685               | 0.0578679  | 0.821751  | 0.94254   |
| Sft2d1_j4        | 0.000682153 | 0.0489695             | 6.16565    | 0.435107  | 1         |
| T2_j2            | 0.420169    | 0.422097              | 0.00660316 | 0.9813    | 0.994152  |
| 1700010I14Rik_j2 | 0.0809901   | 0.100515              | 0.311597   | 0.787358  | 1         |
| 1700010I14Rik_j1 | 1.77E-05    | 0.0970222             | 12.4194    | 0.981525  | 1         |
| Airn_j2          | 0.0358523   | 0.105825              | 0          | 1         | 1         |
| Tcp10a_j3        | 0.0799338   | 0.0130052             | -2.61972   | 0.600511  | 1         |
| Mllt4_j4         | 0.224515    | 0.320164              | 0          | 1         | 1         |
| Mllt4            | 0.152678    | 0.517626              | 0          | 1         | 1         |
| Chd1_j2          | 0.0341523   | 0.0648249             | 0          | 1         | 1         |
| Chd1_j1          | 0           | 0.0530824             | 0          | 1         | 1         |
| Zfp960_j1        | 2.46971     | 2.38206               | -0.0521309 | 0.768618  | 0.921133  |
| Lix1_j2          | 0.706419    | 0.978399              | 0          | 1         | 1         |
| Lix1_j7          | 0.887433    | 1.02773               | 0          | 1         | 1         |
| 4930546H06Rik_j4 | 0.589948    | 0.902533              | 0.613392   | 0.0575025 | 0.280989  |
| Fpr2             | 0.207246    | 0.235765              | 0.186008   | 0.740668  | 0.909129  |
| Ppp2r1a_j3       | 0.199648    | 0.159037              | 0          | 1         | 1         |
| Zfp54_j1         | 0.181649    | 0.302931              | 0.737834   | 0.219616  | 0.566166  |
| Zfp51_j1         | 0.845527    | 1.0412                | 0.300318   | 0.304264  | 0.64997   |
| Zfp760_j4        | 0.326171    | 0.357285              | 0          | 1         | 1         |

|                  |             |           |              |           |           |
|------------------|-------------|-----------|--------------|-----------|-----------|
| Zfp760_j2        | 0.541916    | 0.874096  | 0            | 1         | 1         |
| Zfp229           | 1.5331      | 1.34028   | 0            | 1         | 1         |
| XLOC_013842      | 0           | 0.0912239 | 1.79769e+308 | 0.0049732 | 1         |
| Srrm2_j6         | 9.27467     | 8.23061   | 0            | 1         | 1         |
| Srrm2_j8         | 7.85857     | 8.14931   | 0            | 1         | 1         |
| Abca3            | 33.7985     | 36.4437   | 0.10871      | 0.205268  | 0.549648  |
| Rnps1_j3         | 1.79261     | 2.51877   | 0.490658     | 0.156105  | 0.489534  |
| Rnps1_j7         | 3.19336     | 2.33272   | -0.453063    | 0.0665812 | 0.308319  |
| Rnps1_j9         | 0.567007    | 0.895629  | 0.659536     | 0.109138  | 0.41099   |
| mKIAA1306_j3     | 0.21731     | 0.202344  | 0            | 1         | 1         |
| Pkd1_j2          | 0.507313    | 0.372303  | 0            | 1         | 1         |
| Pkd1_j6          | 1.25775     | 1.16262   | 0            | 1         | 1         |
| Hagh_j1          | 0.27538     | 1.57795   | 0            | 1         | 1         |
| Ift140_j1        | 3.15957     | 3.10493   | 0            | 1         | 1         |
| Ift140_j2        | 0.000387156 | 0.263381  | 0            | 1         | 1         |
| Clcn7_j3         | 1.46572     | 2.09713   | 0.516808     | 0.0335541 | 0.200203  |
| Unkl_j5          | 0.0514412   | 0.0639432 | 0            | 1         | 1         |
| Lmf1_j2          | 4.09187     | 4.18711   | 0            | 1         | 1         |
| Rpusd1           | 0.914124    | 1.59533   | 0            | 1         | 1         |
| Rpusd1_j3        | 0.175699    | 0.182807  | 0            | 1         | 1         |
| Mslnl_j5         | 0.0280054   | 0.117903  | 2.07382      | 0.115533  | 1         |
| A930001N09Rik_j5 | 1.57037     | 1.72352   | 0            | 1         | 1         |
| Kifc5b           | 0.118369    | 0.116031  | -0.0287742   | 0.971887  | 1         |
| XLOC_013900      | 0           | 0.0645333 | 0            | 1         | 1         |
| XLOC_013900      | 0.286885    | 0.521479  | 0            | 1         | 1         |
| Hmga1_j1         | 2.31826     | 1.95968   | -0.242424    | 0.158787  | 0.49326   |
| Pacsin1          | 0.784297    | 0.695232  | 0            | 1         | 1         |
| Snrpc_j1         | 0.249528    | 0.331214  | 0.408563     | 0.640153  | 0.860857  |
| Snrpc_j4         | 7.67668     | 7.70064   | 0.00449673   | 0.981762  | 0.994414  |
| Anks1_j4         | 0.239962    | 0.428295  | 0            | 1         | 1         |
| Scube3_j5        | 0.0371632   | 0.0547032 | 0.557749     | 0.719839  | 1         |
| XLOC_013911      | 0.12988     | 0.21145   | 0.70313      | 0.283262  | 0.631732  |
| Zfp523_j4        | 0.358809    | 0.157012  | -1.19234     | 0.0742658 | 0.328543  |
| Kctd20           | 2.04757     | 11.1206   | 0            | 1         | 1         |
| Sfrs3_j5         | 0.0900405   | 0.0229972 | -1.96911     | 0.261827  | 1         |
| Pi16_j1          | 0.0311693   | 0.110802  | 1.82979      | 0.196998  | 1         |
| Pim1_j1          | 3.02168     | 3.15531   | 0.0624272    | 0.787989  | 0.929394  |
| Tbc1d22b_j1      | 0.913078    | 1.83614   | 1.00787      | 3.57E-05  | 0.0008952 |
| Ftsjd2_j1        | 1.95808     | 2.26844   | 0.212259     | 0.225767  | 0.572899  |
| Zfand3           | 10.0465     | 10.2208   | 0.0248113    | 0.869174  | 0.958391  |
| Dnahc8_j1        | 0.106363    | 0.122805  | 0.207375     | 0.828808  | 1         |
| Pde9a_j3         | 0           | 0.115079  | 1.79769e+308 | 0.0370404 | 1         |
| Pknox1_j2        | 0           | 0.261128  | 0            | 1         | 1         |
| Cyp4f16_j2       | 2.61575     | 3.88975   | 0            | 1         | 1         |
| Cyp4f16_j6       | 0.466181    | 0.936078  | 0            | 1         | 1         |
| Cyp4f15_j2       | 0.0901706   | 0.122225  | 0.43881      | 0.619496  | 1         |
| XLOC_013948      | 0.184885    | 0.16945   | -0.125767    | 0.825044  | 0.943635  |

|                  |             |           |              |           |           |
|------------------|-------------|-----------|--------------|-----------|-----------|
| C920016K16Rik_j3 | 0.753967    | 1.43177   | 0            | 1         | 1         |
| Myo1f_j1         | 0           | 0.0676258 | 1.79769e+308 | 0.0289766 | 1         |
| Pram1_j9         | 0.0733035   | 0.065282  | -0.167197    | 0.859589  | 1         |
| Daxx_j1          | 5.84237     | 6.93655   | 0.247663     | 0.0696543 | 0.316592  |
| Rgl2_j6          | 0.186086    | 0.305026  | 0.712958     | 0.048845  | 0.254618  |
| Vps52_j4         | 5.56765     | 7.20495   | 0            | 1         | 1         |
| XLOC_013965      | 0.0940274   | 0.106788  | 0.183599     | 0.865262  | 1         |
| H2-DMb2_j4       | 0.492874    | 1.26282   | 1.35735      | 0.022157  | 0.151259  |
| BC051142_j2      | 0.000124485 | 0.100668  | 9.65942      | 0.968119  | 1         |
| BC051142_j7      | 0.115472    | 0.158594  | 0.457799     | 0.711769  | 0.895383  |
| BC051142_j6      | 0.230709    | 0.104181  | -1.14699     | 0.341391  | 0.681341  |
| Tnxb_j2          | 0.137032    | 0.198958  | 0.537951     | 0.276901  | 0.625956  |
| Tnxb_j8          | 0.0360074   | 0.117503  | 1.70633      | 0.0079681 | 1         |
| Zbtb12_j1        | 0.0895111   | 0.220515  | 1.30074      | 0.0910089 | 0.370955  |
| Ehmt2_j6         | 9.13227     | 10.83     | 0            | 1         | 1         |
| Vars_j5          | 0.39194     | 0.408791  | 0            | 1         | 1         |
| Vars_j7          | 0.91243     | 0.839102  | 0            | 1         | 1         |
| Vars_j8          | 0.524405    | 0.607028  | 0            | 1         | 1         |
| Clic1_j3         | 1.08077     | 1.31123   | 0            | 1         | 1         |
| Bat3             | 0.0351505   | 0.146961  | 0            | 1         | 1         |
| Bat3_j4          | 0.785957    | 0.518068  | 0            | 1         | 1         |
| Bat3_j11         | 0.206282    | 0.202325  | 0            | 1         | 1         |
| Ltb_j1           | 3.31E-06    | 0.111497  | 15.0399      | 0.998331  | 1         |
| Atp6v1g2_j4      | 12.3768     | 11.5416   | -0.100797    | 0.496104  | 0.783139  |
| Bat1a            | 0.543123    | 0.767025  | 0            | 1         | 1         |
| Bat1a_j5         | 33.6855     | 40.455    | 0            | 1         | 1         |
| H2-D1_j1         | 51.1497     | 48.0964   | -0.0887959   | 0.327831  | 0.670398  |
| Cchcr1_j3        | 0.604069    | 0.999535  | 0.726545     | 0.185019  | 0.525182  |
| Ppp1r10_j1       | 1.81298     | 1.59029   | 0            | 1         | 1         |
| Gnl1_j1          | 28.4682     | 26.7022   | 0            | 1         | 1         |
| Trim10_j1        | 0.0179058   | 0.0815223 | 2.18677      | 0.195955  | 1         |
| Trim10           | 0.0851778   | 0.152663  | 0.841806     | 0.310052  | 1         |
| H2-M3_j1         | 0.418145    | 0.353371  | -0.242822    | 0.705484  | 0.892269  |
| Gm7148           | 1.09138     | 1.01541   | -0.104088    | 0.765201  | 0.919656  |
| Tnfrsf21_j1      | 64.5139     | 72.6155   | 0.170667     | 0.0487522 | 0.254425  |
| Gpr116_j2        | 0.114306    | 0.123316  | 0            | 1         | 1         |
| Pla2g7_j2        | 37.9303     | 32.8298   | 0            | 1         | 1         |
| Enpp5_j3         | 7.99938     | 4.61231   | -0.794399    | 6.84E-05  | 0.0015559 |
| XLOC_014065      | 0.333553    | 0.285658  | -0.223629    | 0.475511  | 0.771421  |
| Crip3_j9         | 0.0533297   | 0.180108  | 1.75585      | 0.167824  | 0.504404  |
| Mrpl2_j1         | 0.770384    | 0.612937  | 0            | 1         | 1         |
| Mrpl2_j2         | 6.74471     | 7.11887   | 0            | 1         | 1         |
| Mea1_j1          | 49.871      | 55.947    | 0.165859     | 0.168241  | 0.50494   |
| Pex6_j1          | 0.0991973   | 0.322081  | 0            | 1         | 1         |
| Trerf1_j10       | 0.200877    | 0.294135  | 0.550166     | 0.209437  | 0.553781  |
| Mrps10_j3        | 2.15436     | 2.62064   | 0            | 1         | 1         |
| Usp49_j1         | 0.987064    | 0.899825  | 0            | 1         | 1         |

|              |            |           |              |           |           |
|--------------|------------|-----------|--------------|-----------|-----------|
| Lrfn2_j1     | 0          | 0.31212   | 0            | 1         | 1         |
| Mocs1        | 2.5358     | 2.64097   | 0            | 1         | 1         |
| St6gal2_j2   | 0.219736   | 0.271692  | 0            | 1         | 1         |
| St6gal2_j3   | 0.250948   | 0.207511  | 0            | 1         | 1         |
| St6gal2_j4   | 1.22407    | 0.656981  | 0            | 1         | 1         |
| Zfp959_j8    | 0.198566   | 0.370899  | 0.90141      | 0.163986  | 0.499725  |
| Ebi3_j1      | 0          | 0.198899  | 1.79769e+308 | 0.0519005 | 0.264297  |
| Ebi3_j2      | 0.0531258  | 0.261379  | 2.29866      | 0.149883  | 0.47962   |
| Mpnd_j7      | 47.7708    | 52.1129   | 0.12551      | 0.317371  | 0.660736  |
| Hdgfrp2_j1   | 0.67017    | 0.644059  | 0            | 1         | 1         |
| Safb_j4      | 9.68614    | 12.022    | 0            | 1         | 1         |
| Tmem146_j7   | 0.048402   | 0.0702929 | 0.538311     | 0.773103  | 1         |
| Ranbp3_j1    | 0          | 1.44278   | 0            | 1         | 1         |
| Ranbp3_j4    | 5.05703    | 5.13108   | 0            | 1         | 1         |
| Ndufa11_j1   | 7.32575    | 6.30006   | -0.21761     | 0.112101  | 0.416662  |
| Dus3l_j2     | 2.46151    | 1.82427   | 0            | 1         | 1         |
| Dus3l_j8     | 6.4755     | 7.04068   | 0            | 1         | 1         |
| Dus3l_j9     | 0.330395   | 0.239705  | 0            | 1         | 1         |
| Crb3         | 0.0664926  | 0.194928  | 1.55167      | 0.289434  | 0.63691   |
| Trip10_j6    | 5.34906    | 5.09497   | 0            | 1         | 1         |
| Emr1_j1      | 0.0348301  | 0.236491  | 2.76338      | 0.0087322 | 0.0774643 |
| Cntnap5c_j5  | 0          | 0.0774146 | 1.79769e+308 | 0.0227681 | 1         |
| Cntnap5c_j7  | 0          | 0.0559889 | 1.79769e+308 | 0.0157128 | 1         |
| Cntnap5c_j13 | 0.0368552  | 0.06419   | 0.800481     | 0.467945  | 1         |
| Fert2_j4     | 1.4267     | 1.30647   | 0            | 1         | 1         |
| XLOC_014132  | 0.098278   | 0.0952802 | 0            | 1         | 1         |
| Man2a1_j2    | 0          | 0.0483114 | 1.79769e+308 | 0.0727332 | 1         |
| Ppp4r1_j4    | 1.45943    | 1.27106   | 0            | 1         | 1         |
| Ppp4r1_j8    | 0.00345276 | 3.79853   | 0            | 1         | 1         |
| XLOC_014135  | 0.064987   | 0.122162  | 0.910573     | 0.46369   | 1         |
| Ddx11_j7     | 0.053762   | 0.0604109 | 0.168222     | 0.882784  | 1         |
| Lama1_j3     | 0          | 0.0472673 | 1.79769e+308 | 0.0118182 | 1         |
| Lama1_j6     | 0.566302   | 0.809705  | 0.515825     | 0.308137  | 0.653037  |
| L3mbtl4_j13  | 0.818762   | 0.643631  | -0.34721     | 0.255594  | 0.604282  |
| L3mbtl4_j15  | 0          | 0.11088   | 1.79769e+308 | 0.0059779 | 1         |
| Epb4.1l3_j10 | 18.945     | 11.627    | 0            | 1         | 1         |
| Dlgap1_j1    | 0.526919   | 1.12706   | 0            | 1         | 1         |
| Myom1_j6     | 0.427123   | 0.608905  | 0.511566     | 0.389795  | 0.716874  |
| Fam179a_j5   | 0          | 0.0959562 | 1.79769e+308 | 0.0166602 | 1         |
| Fam179a_j7   | 0.036619   | 0.114808  | 1.64856      | 0.146129  | 1         |
| Fam179a_j12  | 0.816976   | 0.93765   | 0.198755     | 0.625777  | 0.853992  |
| Clip4_j7     | 1.82229    | 2.2164    | 0            | 1         | 1         |
| Ypel5_j1     | 11.9333    | 20.0075   | 0            | 1         | 1         |
| Birc6_j3     | 0.467745   | 0.433091  | -0.111052    | 0.600852  | 0.841981  |
| Birc6_j9     | 0.155133   | 0.125665  | -0.303923    | 0.465034  | 0.764951  |
| Ltbp1_j4     | 0.126374   | 0.170097  | 0            | 1         | 1         |
| Ltbp1_j3     | 0          | 0.0726296 | 0            | 1         | 1         |



|                  |           |           |              |           |           |
|------------------|-----------|-----------|--------------|-----------|-----------|
| Fam82a1_j7       | 1.22395   | 1.18781   | -0.0432416   | 0.888904  | 0.964761  |
| Galm_j4          | 0.119813  | 0.374044  | 1.64243      | 0.0645056 | 0.301833  |
| Tmem178_j1       | 0.371501  | 0.6019    | 0.696157     | 0.205181  | 0.549561  |
| Eml4_j1          | 0.915796  | 0.586088  | 0            | 1         | 1         |
| Eml4_j6          | 0         | 0.509589  | 0            | 1         | 1         |
| XLOC_014190      | 0.100255  | 0.0925462 | 0            | 1         | 1         |
| Plekhh2_j1       | 0.0334136 | 0.0934807 | 1.48423      | 0.300731  | 1         |
| Plekhh2_j7       | 0.176254  | 0.33057   | 0.907301     | 0.0616104 | 0.293328  |
| Dync2li1_j1      | 0         | 0.137494  | 1.79769e+308 | 0.0702653 | 1         |
| 1700106N22Rik_j1 | 0.687616  | 0.253246  | -1.44106     | 0.0979424 | 0.386815  |
| Prkce_j3         | 30.4961   | 27.4828   | 0            | 1         | 1         |
| Prkce_j5         | 19.9538   | 18.1222   | 0            | 1         | 1         |
| 1700090G07Rik_j1 | 0.0318568 | 0.156152  | 2.29328      | 0.115814  | 1         |
| Rhoq_j1          | 0.305251  | 0.725509  | 1.249        | 0.0009161 | 0.0133291 |
| Rhoq_j5          | 0         | 0.127322  | 1.79769e+308 | 0.014054  | 1         |
| Ttc7_j4          | 0.220736  | 0.481306  | 1.12464      | 0.0452785 | 0.243556  |
| Msh2_j2          | 1.77181   | 3.14808   | 0.829249     | 0.0024411 | 0.0292844 |
| XLOC_014209      | 0.0529551 | 0.113077  | 1.09446      | 0.335905  | 1         |
| Foxn2_j1         | 0         | 0.25102   | 1.79769e+308 | 3.84E-05  | 0.0009527 |
| XLOC_014214      | 0.051226  | 0.0987952 | 0            | 1         | 1         |
| Serac1_j4        | 0.120973  | 0.196224  | 0            | 1         | 1         |
| Tmem181c-ps_j2   | 7.02588   | 6.62193   | -0.0854266   | 0.67446   | 0.877215  |
| Rnaset2a         | 10.4278   | 12.352    | 0.24431      | 0.102069  | 0.395903  |
| Qk               | 6.75533   | 6.88852   | 0            | 1         | 1         |
| Map3k4_j5        | 0.168319  | 0.0681865 | 0            | 1         | 1         |
| Slc22a3_j5       | 3.03E-05  | 0.0671415 | 11.1132      | 0.97091   | 1         |
| Pnlcd1_j1        | 0.0784719 | 0.103699  | 0.402161     | 0.722349  | 1         |
| BC068229_j3      | 0.406628  | 0.413155  | 0.0229755    | 0.934903  | 0.980088  |
| Tcte2_j1         | 0.0965517 | 0.0878666 | -0.135988    | 0.910617  | 1         |
| Wdr27_j3         | 0.0967944 | 0.0602678 | -0.683535    | 0.605197  | 1         |
| Lnpep_j3         | 3.48906   | 2.93752   | 0            | 1         | 1         |
| XLOC_014287      | 0.418031  | 0.487668  | 0            | 1         | 1         |
| XLOC_014288      | 0.157767  | 0.121057  | -0.382108    | 0.538444  | 0.807898  |
| Zfp13_j2         | 1.09849   | 0.806266  | -0.446191    | 0.130244  | 0.449289  |
| Thoc6_j2         | 5.17381   | 8.78733   | 0.764198     | 1.30E-10  | 1.30E-08  |
| Flywch1_j6       | 0.357529  | 1.01014   | 0            | 1         | 1         |
| Flywch1_j5       | 6.63111   | 5.69876   | 0            | 1         | 1         |
| Abca17_j4        | 0.0604178 | 0.0957318 | 0.664024     | 0.402172  | 1         |
| Abca17_j7        | 0         | 0.0585196 | 1.79769e+308 | 0.04561   | 1         |
| D330041H03Rik_j1 | 0.0419347 | 0.0654887 | 0.643101     | 0.497972  | 1         |
| Tsc2_j6          | 0.776899  | 0.893177  | 0            | 1         | 1         |
| Tsc2_j5          | 2.36906   | 1.90016   | 0            | 1         | 1         |
| Mapk8ip3_j3      | 0.890118  | 1.08874   | 0            | 1         | 1         |
| Mapk8ip3         | 11.0931   | 9.77981   | 0            | 1         | 1         |
| Ube2i_j7         | 0.795344  | 0.942604  | 0.245073     | 0.320855  | 0.664068  |
| Cacna1h_j1       | 0         | 0.215678  | 0            | 1         | 1         |
| Cacna1h_j2       | 0.400613  | 0.540847  | 0            | 1         | 1         |

|              |             |           |              |           |           |
|--------------|-------------|-----------|--------------|-----------|-----------|
| Sox8_j3      | 0.0185271   | 0.0788991 | 2.09037      | 0.180333  | 1         |
| Chtf18_j1    | 0.586263    | 0.52732   | -0.152869    | 0.606703  | 0.845067  |
| Rhot2_j2     | 0.755913    | 0.607787  | -0.314655    | 0.211125  | 0.555924  |
| Wdr90_j13    | 0.198125    | 0.131444  | -0.591958    | 0.638073  | 0.859943  |
| Rab40C_j2    | 5.5778      | 6.78183   | 0            | 1         | 1         |
| Pigq_j3      | 0           | 0.142821  | 0            | 1         | 1         |
| Solh_j3      | 0.113931    | 0.07855   | 0            | 1         | 1         |
| Solh_j1      | 0.000723662 | 0.229764  | 0            | 1         | 1         |
| Rab11fip3_j2 | 13.089      | 12.4997   | 0            | 1         | 1         |
| Decr2_j4     | 0           | 0.100466  | 1.79769e+308 | 0.040529  | 1         |
| Pdia2_j7     | 0.0933828   | 0.221233  | 1.24434      | 0.0424111 | 0.232786  |
| Cuta_j2      | 9.92849     | 13.0712   | 0            | 1         | 1         |
| Lemd2_j4     | 0.165337    | 0.0418586 | 0            | 1         | 1         |
| Grm4_j3      | 3.96956     | 3.28483   | 0            | 1         | 1         |
| Nudt3_j7     | 18.8187     | 17.0576   | 0            | 1         | 1         |
| D17Wsu92e_j2 | 3.70031     | 4.55511   | 0            | 1         | 1         |
| Tcp11_j2     | 16.7962     | 18.3677   | 0.129031     | 0.299315  | 0.646197  |
| Tead3_j2     | 0.0270917   | 0.0616587 | 1.18645      | 0.464835  | 1         |
| Tead3        | 0.222981    | 0.335391  | 0.588925     | 0.115332  | 0.422397  |
| Stk38_j4     | 0           | 0.51553   | 0            | 1         | 1         |
| Stk38_j6     | 0           | 0.101529  | 0            | 1         | 1         |
| Stk38_j5     | 0.813524    | 1.04216   | 0            | 1         | 1         |
| Cpne5_j4     | 0.572506    | 0.321567  | 0            | 1         | 1         |
| Cpne5_j5     | 0.143537    | 0.476815  | 0            | 1         | 1         |
| Mdga1_j1     | 0.343507    | 1.09817   | 0            | 1         | 1         |
| Btbd9_j8     | 0.000313361 | 1.53064   | 0            | 1         | 1         |
| Glo1_j3      | 0.233548    | 0.536446  | 1.19971      | 0.349038  | 0.687     |
| Wdr4_j2      | 1.9677      | 1.68498   | 0            | 1         | 1         |
| Wdr4_j1      | 0.0885956   | 0         | 0            | 1         | 1         |
| Notch3_j9    | 0.179145    | 0.265155  | 0.565712     | 0.200202  | 0.543468  |
| Ephx3        | 0.123329    | 0.207347  | 0.749534     | 0.302438  | 0.648474  |
| Akap8l_j4    | 2.33133     | 1.28098   | -0.86391     | 5.37E-06  | 0.0001801 |
| Akap8l_j3    | 0.348481    | 0.444556  | 0.351283     | 0.241158  | 0.588276  |
| Wiz_j3       | 0.360615    | 0.377935  | 0.0676778    | 0.868042  | 0.958223  |
| Wiz_j11      | 0.368147    | 0.28729   | -0.357776    | 0.376906  | 0.70877   |
| Wiz_j5       | 0.769402    | 0.858504  | 0.158088     | 0.584067  | 0.833298  |
| Rasal3_j1    | 0           | 0.102203  | 1.79769e+308 | 0.0258063 | 1         |
| Rasal3_j2    | 0           | 0.151322  | 1.79769e+308 | 0.0006902 | 1         |
| Zfp871_j1    | 0.0731105   | 0.119865  | 0            | 1         | 1         |
| Zfp870_j1    | 0.205949    | 0.221634  | 0.105891     | 0.876438  | 0.960747  |
| Cyp4f13_j5   | 0.451636    | 0.417401  | -0.113726    | 0.830225  | 0.945345  |
| Zfp81_j3     | 0           | 0.240968  | 0            | 1         | 1         |
| Zfp81_j4     | 0           | 0.0542823 | 0            | 1         | 1         |
| Zfp101_j6    | 0           | 0.331333  | 1.79769e+308 | 0.0004089 | 0.0068925 |
| AK136742_j1  | 0.0565193   | 0.109349  | 0.952123     | 0.457128  | 1         |
| Brd2_j3      | 4.207       | 4.34576   | 0            | 1         | 1         |
| Brd2_j4      | 1.55086     | 2.05212   | 0            | 1         | 1         |

|                  |            |           |              |           |           |
|------------------|------------|-----------|--------------|-----------|-----------|
| Btln6_j1         | 0.0762933  | 0.12068   | 0.661557     | 0.525427  | 1         |
| Ppt2_j2          | 0.94003    | 1.10655   | 0.235294     | 0.467826  | 0.766747  |
| C4a_j1           | 3.79901    | 5.6343    | 0            | 1         | 1         |
| C4b_j2           | 1.78793    | 3.24951   | 0            | 1         | 1         |
| C4b_j3           | 1.28241    | 2.42124   | 0            | 1         | 1         |
| Skiv2l_j5        | 0.112533   | 0.065583  | 0            | 1         | 1         |
| Skiv2l_j10       | 0.379059   | 0.290001  | 0            | 1         | 1         |
| 1110038B12Rik_j1 | 10.0429    | 14.8508   | 0.564368     | 0.0114094 | 0.0945204 |
| Msh5_j2          | 0.0217879  | 0.118125  | 2.43871      | 0.29034   | 1         |
| Msh5_j3          | 0.0351904  | 0.106797  | 1.60162      | 0.197743  | 1         |
| Prrc2a           | 6.59637    | 7.93935   | 0            | 1         | 1         |
| Vars2_j3         | 1.76008    | 1.85127   | 0.0728788    | 0.762925  | 0.918329  |
| Vars2_j4         | 0.0508845  | 0.183894  | 1.85357      | 0.0030183 | 0.0345818 |
| Vars2_j9         | 0.330691   | 0.254661  | -0.376906    | 0.408505  | 0.728813  |
| Abcf1_j3         | 0          | 0.573623  | 1.79769e+308 | 8.28E-07  | 3.52E-05  |
| Prr3_j3          | 1.22983    | 2.2048    | 0            | 1         | 1         |
| H2-T23_j2        | 2.30367    | 3.26404   | 0            | 1         | 1         |
| H2-T22           | 3.91567    | 3.77595   | 0            | 1         | 1         |
| H2-M1_j6         | 0.0309237  | 0.121732  | 1.97692      | 0.453436  | 1         |
| H2-M1_j7         | 0.0532316  | 0.153133  | 1.52443      | 0.149949  | 1         |
| Ppp1r11_j1       | 0.351572   | 0.348353  | 0            | 1         | 1         |
| H2-M5_j1         | 0.145617   | 0.21635   | 0.571195     | 0.235558  | 0.582812  |
| XLOC_014477      | 0.0226585  | 0.0846661 | 1.90173      | 0.22398   | 1         |
| Tdrd6            | 0.0111859  | 0.0752164 | 0            | 1         | 1         |
| Slc25a27_j4      | 0.364147   | 0.279158  | -0.383442    | 0.401969  | 0.725142  |
| Cdc5l_j1         | 0.270575   | 0.310506  | 0.198595     | 0.747167  | 0.911904  |
| Cdc5l_j9         | 0.107934   | 0.0757681 | -0.510483    | 0.695117  | 1         |
| Slc29a1_j12      | 4.82119    | 5.0018    | 0.0530566    | 0.870347  | 0.958722  |
| Slc29a1_j11      | 0          | 1.09631   | 1.79769e+308 | 3.62E-07  | 1.67E-05  |
| Slc29a1_j13      | 0          | 0.307998  | 1.79769e+308 | 0.0034275 | 0.0382719 |
| Slc29a1_j14      | 0.240487   | 0.246653  | 0.036525     | 0.955514  | 0.987197  |
| Slc29a1          | 0.578866   | 0.489482  | -0.241974    | 0.601814  | 0.842478  |
| Capn11_j6        | 0.030952   | 0.109594  | 1.82407      | 0.369877  | 1         |
| Capn11_j7        | 0.148819   | 0.0945253 | -0.654787    | 0.382106  | 0.712223  |
| Tmem63b_j8       | 42.8531    | 36.6025   | 0            | 1         | 1         |
| Tjap1_j10        | 1.28978    | 1.06426   | 0            | 1         | 1         |
| Tjap1_j9         | 0.00929526 | 0.634341  | 0            | 1         | 1         |
| Tjap1_j8         | 0.839481   | 0.828542  | 0            | 1         | 1         |
| Ttbk1_j7         | 2.18016    | 1.76131   | 0            | 1         | 1         |
| Ttbk1_j8         | 8.6755     | 7.84948   | 0            | 1         | 1         |
| Cul9_j4          | 0.452314   | 1.13945   | 0            | 1         | 1         |
| Klhdc3_j8        | 1.70616    | 1.42603   | -0.258753    | 0.428191  | 0.742116  |
| Ptcra_j4         | 0.0236447  | 0.0493578 | 1.06176      | 0.673165  | 1         |
| Ptcra_j3         | 1.30434    | 2.21422   | 0.763474     | 0.020917  | 0.145317  |
| Ubr2_j2          | 1.61391    | 1.45266   | 0            | 1         | 1         |
| Prickle4_j2      | 0.603301   | 0.732893  | 0.280724     | 0.369172  | 0.702462  |
| Foxp4_j7         | 0.500794   | 0.512004  | 0            | 1         | 1         |

|                  |             |                        |            |           |           |
|------------------|-------------|------------------------|------------|-----------|-----------|
| Daam2_j8         | 0.000204596 | 0.598546               | 0          | 1         | 1         |
| Daam2_j9         | 0.0926169   | 0.273993               | 0          | 1         | 1         |
| Satb1_j4         | 0.0527505   | 1.02085                | 0          | 1         | 1         |
| Slc5a7_j1        | 0           | 0.0662412 1.79769e+308 | 0.0253663  |           | 1         |
| Pot1b_j3         | 0.0911972   | 0.308066               | 1.75618    | 0.004327  | 0.0455597 |
| Zfp119_j3        | 1.06885     | 1.09851                | 0.039485   | 0.878511  | 0.961135  |
| Zfp119b          | 0.137947    | 0.305123               | 1.14527    | 0.0713337 | 0.321081  |
| Sema6b_j1        | 0           | 0.262929 1.79769e+308  | 8.44E-05   |           | 0.0018559 |
| Ptprs_j3         | 3.84687     | 4.05458                | 0          | 1         | 1         |
| Ptprs_j4         | 0.1159      | 0.299945               | 0          | 1         | 1         |
| Ptprs_j5         | 9.21014     | 5.26452                | 0          | 1         | 1         |
| XLOC_014550      | 0           | 0.070868 1.79769e+308  | 0.0024251  |           | 1         |
| Safb2            | 0.774308    | 0.840218               | 0          | 1         | 1         |
| Lonp1_j2         | 12.7281     | 14.1949                | 0          | 1         | 1         |
| Rfx2_j6          | 0.04121     | 0.121475               | 1.55959    | 0.253576  | 1         |
| Rfx2_j7          | 0           | 0.0617976 1.79769e+308 | 0.071355   |           | 1         |
| Slc25a23_j5      | 2.71681     | 2.44007                | 0          | 1         | 1         |
| Slc25a23_j3      | 0.331111    | 0.151594               | 0          | 1         | 1         |
| Gm11110_j1       | 0.108609    | 0.0680833              | -0.673778  | 0.612839  | 1         |
| C3               | 0.264736    | 0.435503               | 0.718129   | 0.0170737 | 0.126115  |
| Gpr108_j2        | 1.25713     | 0.792121               | 0          | 1         | 1         |
| Efna5_j4         | 0           | 1.79735                | 0          | 1         | 1         |
| Vapa_j5          | 1.50961     | 2.1765                 | 0          | 1         | 1         |
| 1110012J17Rik_j3 | 14.2585     | 14.0848                | -0.0176763 | 0.851322  | 0.952833  |
| Ptprm_j5         | 0.617056    | 0.990425               | 0          | 1         | 1         |
| Arhgap28_j7      | 0.390794    | 0.125525               | 0          | 1         | 1         |
| Arhgap28_j8      | 0.432309    | 0.5689                 | 0          | 1         | 1         |
| Emilin2_j2       | 0.0602292   | 0.0867093              | 0.525723   | 0.568403  | 1         |
| Ndc80            | 0.0556647   | 0.144715               | 1.37838    | 0.124953  | 1         |
| XLOC_014604      | 0.0133282   | 0.161824               | 3.60188    | 0.0924062 | 0.37398   |
| XLOC_014605      | 0.113983    | 0.191614               | 0.749383   | 0.333429  | 0.674429  |
| Galnt14_j3       | 6.6651      | 4.09713                | -0.702014  | 0.001675  | 0.0216617 |
| Xdh_j3           | 0.634789    | 1.67423                | 0          | 1         | 1         |
| Memo1_j4         | 5.67682     | 5.90274                | 0          | 1         | 1         |
| Eif2ak2_j4       | 0.770061    | 1.4185                 | 0.881324   | 2.66E-05  | 0.0006995 |
| Cebpz_j2         | 5.73445     | 6.88154                | 0.263077   | 0.0381196 | 0.216951  |
| Dhx57_j7         | 1.03604     | 3.91394                | 0          | 1         | 1         |
| Dhx57_j8         | 3.126       | 5.70782                | 0          | 1         | 1         |
| Cdkl4_j4         | 0.367607    | 0.193138               | -0.928528  | 0.112161  | 0.416787  |
| Map4k3_j1        | 4.52624     | 4.00489                | 0          | 1         | 1         |
| Map4k3_j2        | 0           | 1.08274                | 0          | 1         | 1         |
| Thumpd2_j1       | 0           | 0.0830875 1.79769e+308 | 0.0105851  |           | 1         |
| Slc8a1_j3        | 2.32E-05    | 0.127878               | 12.4302    | 0.953374  | 1         |
| Slc8a1_j4        | 0.133268    | 0.143892               | 0.110657   | 0.824519  | 1         |
| Kcng3_j2         | 2.31868     | 1.63585                | 0          | 1         | 1         |
| Thada_j1         | 1.34022     | 1.2106                 | -0.146757  | 0.290099  | 0.637464  |
| Lrpprc_j2        | 9.17994     | 9.66602                | 0          | 1         | 1         |

|                   |            |           |              |           |           |
|-------------------|------------|-----------|--------------|-----------|-----------|
| Prepl_j1          | 28.1247    | 31.9301   | 0            | 1         | 1         |
| Srbd1_j1          | 0          | 0.695482  | 1.79769e+308 | 2.58E-05  | 0.0006819 |
| XLOC_014662       | 0.0440414  | 0.251966  | 2.5163       | 0.112915  | 0.418262  |
| Nrxn1_j8          | 5.97774    | 8.53391   | 0            | 1         | 1         |
| Nrxn1             | 1.2923     | 0.899808  | 0            | 1         | 1         |
| 2610044O15Rik_j1  | 0.00357391 | 2.03474   | 0            | 1         | 1         |
| 2610044O15Rik_j2  | 0.653121   | 0.491398  | -0.41046     | 0.528126  | 0.801964  |
| 2610044O15Rik_j3  | 0.759497   | 1.06734   | 0.490899     | 0.170125  | 0.507178  |
| Scaf8_j9          | 1.01385    | 1.61728   | 0            | 1         | 1         |
| Tiam2_j1          | 0.302525   | 0.223694  | 0            | 1         | 1         |
| Tiam2_j3          | 0.896936   | 0.983994  | 0            | 1         | 1         |
| XLOC_013763       | 0.198782   | 0.279049  | 0.489329     | 0.543285  | 0.810795  |
| XLOC_013764       | 0.198076   | 0.211654  | 0.095656     | 0.913695  | 0.972914  |
| Zdhhc14_j6        | 1.73571    | 1.70028   | -0.0297539   | 0.905377  | 0.969961  |
| Snx9_j6           | 0.319515   | 3.60712   | 0            | 1         | 1         |
| Tulp4_j3          | 0.702497   | 0.64408   | -0.125251    | 0.58626   | 0.834297  |
| Fgfr1op_j4        | 2.97516    | 3.55354   | 0.256291     | 0.214006  | 0.559247  |
| Pde10a_j4         | 2.67127    | 2.60393   | 0            | 1         | 1         |
| 1700010I14Rik_j5  | 0.0560305  | 0.106127  | 0.921505     | 0.43173   | 1         |
| Park2_j1          | 2.00856    | 1.87356   | -0.100379    | 0.5823    | 0.832693  |
| Agpat4_j1         | 0.559126   | 1.07793   | 0            | 1         | 1         |
| Tcp1_j4           | 32.7522    | 33.0134   | 0.0114567    | 0.902732  | 0.968976  |
| Mllt4_j8          | 0.0569383  | 0         | 0            | 1         | 1         |
| Mllt4_j7          | 0.737757   | 0.457661  | 0            | 1         | 1         |
| Mllt4_j9          | 2.59565    | 2.72312   | 0            | 1         | 1         |
| XLOC_013808       | 0.0409687  | 0.167289  | 2.02975      | 0.032834  | 0.197381  |
| Tbp_j2            | 3.97167    | 3.81693   | -0.0573342   | 0.785644  | 0.928253  |
| Chd1_j3           | 0.0285731  | 0.604616  | 0            | 1         | 1         |
| Chd1_j6           | 0.264642   | 0.437536  | 0            | 1         | 1         |
| 4930546H06Rik_j2  | 0.957971   | 0.932154  | -0.0394132   | 0.901772  | 0.968734  |
| 4930546H06Rik_j10 | 0          | 0.120756  | 1.79769e+308 | 0.0004775 | 1         |
| 4930546H06Rik_j9  | 0.0553692  | 0.0915905 | 0.726115     | 0.307725  | 1         |
| XLOC_013825       | 0.172618   | 0.132886  | -0.3774      | 0.459965  | 0.76171   |
| Zfp54_j2          | 0.769963   | 0.559644  | -0.460279    | 0.232173  | 0.579201  |
| Zfp54             | 0.167984   | 0.306371  | 0.866955     | 0.18895   | 0.530559  |
| Zfp54             | 2.93E-05   | 0.13671   | 12.1891      | 0.971783  | 1         |
| XLOC_013834       | 0.477293   | 0.468061  | -0.0281763   | 0.9279    | 0.977678  |
| 3110052M02Rik_j3  | 3.82512    | 3.25733   | 0            | 1         | 1         |
| Zfp943_j1         | 0.15187    | 0.430012  | 1.50154      | 0.000911  | 0.0132751 |
| XLOC_013841       | 0.107455   | 0.1709    | 0.669418     | 0.326155  | 0.669409  |
| Ccdc64b_j1        | 0.104447   | 0.169524  | 0.698713     | 0.378786  | 0.710354  |
| Rnps1_j8          | 1.75386    | 2.07094   | 0.239753     | 0.570079  | 0.826128  |
| mKIAA1306_j2      | 8.57739    | 7.95854   | 0            | 1         | 1         |
| Pkd1_j4           | 0.480443   | 0.491135  | 0            | 1         | 1         |
| Tpsb2             | 0.300285   | 0.739384  | 1.29999      | 0.0027605 | 0.0322486 |
| AK079380_j2       | 0          | 0.2733    | 1.79769e+308 | 0.036022  | 0.209415  |
| Mslnl_j2          | 0.0649908  | 0.110341  | 0.763658     | 0.36807   | 1         |

|                  |           |           |              |           |           |
|------------------|-----------|-----------|--------------|-----------|-----------|
| Neurl1b_j1       | 0.120611  | 0.165025  | 0.452323     | 0.491878  | 0.78074   |
| A930001N09Rik_j8 | 4.32915   | 2.94606   | 0            | 1         | 1         |
| Kifc5b_j4        | 0         | 0.063923  | 1.79769e+308 | 0.0926421 | 1         |
| Kifc5b           | 0         | 0.076585  | 1.79769e+308 | 0.0415657 | 1         |
| XLOC_013900      | 0.407158  | 0.524136  | 0            | 1         | 1         |
| Itpr3_j3         | 0.582964  | 1.21941   | 0            | 1         | 1         |
| Snrpc_j7         | 0.257526  | 0.300498  | 0.222639     | 0.454806  | 0.758773  |
| Anks1_j2         | 0.233766  | 0.336724  | 0            | 1         | 1         |
| Anks1_j3         | 0.385213  | 0.444945  | 0            | 1         | 1         |
| Scube3_j3        | 0         | 0.134855  | 1.79769e+308 | 0.007218  | 1         |
| Fance            | 0.868036  | 0.43674   | -0.990981    | 0.0548346 | 0.273143  |
| Fance_j10        | 0.784055  | 1.02491   | 0.386472     | 0.398354  | 0.722446  |
| Rpl10a_j4        | 0.0864361 | 0.192289  | 1.15357      | 0.107331  | 0.407235  |
| Cdkn1a_j1        | 0         | 2.90518   | 0            | 1         | 1         |
| BC004004_j3      | 0.287516  | 1.23062   | 0            | 1         | 1         |
| Pi16_j2          | 0.437527  | 0.496161  | 0.181436     | 0.747506  | 0.912113  |
| Fgd2_j4          | 0.02947   | 0.107679  | 1.86942      | 0.144933  | 1         |
| Fgd2_j7          | 0.314058  | 0.448241  | 0.513245     | 0.359476  | 0.694728  |
| Zfand3_j4        | 0.869869  | 0.513862  | -0.759418    | 0.536851  | 0.80709   |
| Pknox1_j3        | 0.138247  | 0.272074  | 0            | 1         | 1         |
| Pknox1_j5        | 0.486989  | 0.710181  | 0            | 1         | 1         |
| Rrp1b_j1         | 0.0498822 | 0.0322405 | -0.62965     | 0.599887  | 1         |
| Rrp1b_j2         | 0.205228  | 0.24801   | 0.273168     | 0.558866  | 0.820245  |
| Cyp4f17_j1       | 0.815574  | 0.996133  | 0            | 1         | 1         |
| Cyp4f16_j4       | 0.352551  | 0.6435    | 0            | 1         | 1         |
| Cyp4f16_j8       | 0.216304  | 0.259001  | 0            | 1         | 1         |
| Adamts10_j7      | 0.438021  | 0.460317  | 0.0716266    | 0.838624  | 0.948621  |
| Adamts10_j6      | 0.466244  | 0.807809  | 0.792928     | 0.0065522 | 0.0625462 |
| Adamts10_j12     | 0.290429  | 0.162016  | -0.842052    | 0.145776  | 0.473758  |
| Kank3_j1         | 4.6802    | 4.69769   | 0.0053796    | 0.970374  | 0.991599  |
| Ndufa7_j1        | 63.916    | 72.2859   | 0.177538     | 0.142322  | 0.468976  |
| H2-DMb2_j2       | 0.211892  | 0.440137  | 1.05463      | 0.147718  | 0.476359  |
| IAP_j2           | 0.0764799 | 0.0422001 | -0.857833    | 0.705623  | 1         |
| IAP_j3           | 0.188238  | 0.261576  | 0.474669     | 0.291924  | 0.638801  |
| IAP_j4           | 0.182033  | 0.318195  | 0.805712     | 0.327896  | 0.670433  |
| Ager_j4          | 0         | 0.0771029 | 0            | 1         | 1         |
| Ager_j5          | 0.271931  | 0.244838  | 0            | 1         | 1         |
| Prnt1_j3         | 2.21687   | 3.49507   | 0.656794     | 0.0155374 | 0.11773   |
| XLOC_013982      | 0.0799864 | 0.109027  | 0.446858     | 0.58552   | 1         |
| Tnxb_j1          | 0.0493512 | 0.0935296 | 0.922337     | 0.601423  | 1         |
| Tnxb_j5          | 0.270307  | 0.269674  | -0.00338435  | 0.991143  | 0.997365  |
| Tnxb_j9          | 0.196347  | 0.251783  | 0.358778     | 0.279297  | 0.628022  |
| Rdbp             | 2.6442    | 2.17452   | 0            | 1         | 1         |
| Ehmt2_j2         | 0.219698  | 0.592521  | 0            | 1         | 1         |
| Ehmt2_j5         | 0.570263  | 1.94324   | 0            | 1         | 1         |
| Neu1_j1          | 7.53467   | 8.4048    | 0.15767      | 0.355199  | 0.691124  |
| Hspa1l           | 0.297171  | 0.436022  | 0.553109     | 0.334585  | 0.675359  |

|              |           |           |              |           |           |
|--------------|-----------|-----------|--------------|-----------|-----------|
| Clic1_j1     | 58.061    | 83.3729   | 0            | 1         | 1         |
| Gpank1       | 0.420063  | 0.443442  | 0.078141     | 0.726301  | 0.902924  |
| Bat3_j3      | 0.0583516 | 0.173954  | 0            | 1         | 1         |
| Bat3_j10     | 0.0621893 | 0.0779274 | 0            | 1         | 1         |
| Atp6v1g2_j3  | 5.32412   | 6.17212   | 0.213223     | 0.25975   | 0.608472  |
| Bat1a_j4     | 13.3185   | 15.274    | 0            | 1         | 1         |
| Mdc1_j2      | 1.02045   | 1.09959   | 0            | 1         | 1         |
| Trim10_j2    | 0         | 0.19659   | 1.79769e+308 | 0.0264012 | 0.170737  |
| Rnf39_j1     | 0.0753274 | 0.0828038 | 0            | 1         | 1         |
| Gabbr1_j1    | 47.798    | 48.6953   | 0            | 1         | 1         |
| Clic5_j2     | 0         | 0.0878716 | 1.79769e+308 | 0.169764  | 1         |
| Nfkbie_j2    | 0.354358  | 0.895097  | 1.33684      | 0.0035302 | 0.0391871 |
| Gtpbp2_j4    | 6.66098   | 8.84816   | 0            | 1         | 1         |
| Gm88_j2      | 3.4856    | 3.23932   | -0.105716    | 0.727681  | 0.903503  |
| Crip3_j10    | 0.141293  | 0.0795767 | -0.828277    | 0.616544  | 0.848924  |
| Trerf1_j9    | 0.0812809 | 0.0762339 | -0.0924838   | 0.908451  | 1         |
| Mrps10_j5    | 6.32226   | 5.47405   | 0            | 1         | 1         |
| Usp49_j4     | 0.665211  | 0.824145  | 0            | 1         | 1         |
| AI314976_j3  | 4.31717   | 4.89776   | 0.182035     | 0.445528  | 0.753013  |
| XLOC_014093  | 0.299407  | 0.42288   | 0.498141     | 0.49822   | 0.783887  |
| Zfp959_j3    | 0.0705887 | 0.117884  | 0.739858     | 0.449959  | 1         |
| Ccdc94_j3    | 0.0879453 | 0.0984779 | 0.163194     | 0.909012  | 1         |
| Shd_j3       | 5.66088   | 5.69619   | 0.00896883   | 0.962347  | 0.989496  |
| Tnfaip8l1    | 0.380534  | 0.412793  | 0.117393     | 0.755941  | 0.915824  |
| Tnfaip8l1_j1 | 0         | 0.231159  | 1.79769e+308 | 0.0016534 | 0.0214161 |
| Uhrf1_j2     | 0.132691  | 0.125245  | -0.083311    | 0.942444  | 1         |
| Kdm4b_j7     | 0.335164  | 0.157902  | -1.08584     | 0.0348957 | 0.205266  |
| XLOC_014115  | 0.0531374 | 0.126839  | 1.2552       | 0.47017   | 1         |
| Safb_j1      | 0         | 1.63444   | 0            | 1         | 1         |
| Tmem146_j3   | 0         | 0.14883   | 1.79769e+308 | 0.0480925 | 1         |
| Tmem146_j5   | 0.0189581 | 0.0580748 | 1.6151       | 0.367429  | 1         |
| Tmem146_j8   | 0.0696763 | 0.105017  | 0.591889     | 0.585851  | 1         |
| Tmem146_j9   | 0.0341973 | 0.0919312 | 1.42667      | 0.443515  | 1         |
| Dus3l_j1     | 0.157434  | 0.313998  | 0            | 1         | 1         |
| Man2a1_j3    | 0.932045  | 1.08127   | 0.21426      | 0.430907  | 0.743385  |
| Ddx11_j8     | 0.0221753 | 0.119098  | 2.42512      | 0.148698  | 1         |
| XLOC_014140  | 0.0860958 | 0.174356  | 1.01802      | 0.347258  | 0.68591   |
| L3mbtl4_j4   | 0.27928   | 0.173769  | -0.684546    | 0.324203  | 0.667403  |
| Epb4.1l3_j9  | 96.1689   | 92.4654   | 0            | 1         | 1         |
| Zfp161_j2    | 2.72973   | 3.11352   | 0            | 1         | 1         |
| Dlgap1_j3    | 1.23961   | 1.08335   | 0            | 1         | 1         |
| Lpin2_j2     | 3.72899   | 4.41991   | 0            | 1         | 1         |
| Fam179a_j8   | 0         | 0.605121  | 1.79769e+308 | 2.96E-06  | 0.0001075 |
| Fam179a_j9   | 0.457188  | 0.256337  | -0.834745    | 0.149276  | 0.478525  |
| Ehd3_j5      | 12.8847   | 18.7253   | 0            | 1         | 1         |
| Slc30a6_j2   | 2.10073   | 2.23682   | 0.0905596    | 0.778884  | 0.925554  |
| Birc6_j11    | 5.99508   | 6.17102   | 0.0417313    | 0.685198  | 0.882524  |

|               |             |           |              |           |           |
|---------------|-------------|-----------|--------------|-----------|-----------|
| Birc6_j12     | 15.5808     | 15.7755   | 0.0179182    | 0.876708  | 0.960797  |
| Ltbp1_j1      | 2.89E-05    | 0.227106  | 0            | 1         | 1         |
| Crim1_j5      | 0           | 0.220949  | 1.79769e+308 | 0.0001161 | 0.0024372 |
| Fam82a1_j3    | 0           | 0.101599  | 1.79769e+308 | 0.0109453 | 1         |
| Galm_j3       | 0.476942    | 0.38031   | -0.326637    | 0.61233   | 0.84734   |
| Morn2         | 10.6569     | 11.4403   | 0.102332     | 0.537694  | 0.807734  |
| Eml4_j4       | 2.27179     | 2.55828   | 0            | 1         | 1         |
| Mta3_j4       | 2.57296     | 3.15581   | 0            | 1         | 1         |
| Plekhh2_j4    | 0           | 0.111634  | 1.79769e+308 | 0.0896119 | 1         |
| Ppm1b_j1      | 19.3937     | 18.3005   | -0.0837035   | 0.44939   | 0.755499  |
| 1700090G07Rik | 0           | 0.0656237 | 1.79769e+308 | 0.0776109 | 1         |
| Rhoq_j3       | 11.4272     | 16.019    | 0.487319     | 7.95E-06  | 0.0002536 |
| Ttc7_j5       | 0.913635    | 0.781097  | -0.226116    | 0.523309  | 0.799177  |
| Msh6_j1       | 0.201109    | 0.226425  | 0            | 1         | 1         |
| Ston1_j3      | 0.12269     | 0.180846  | 0            | 1         | 1         |
| AK138253_j2   | 1.02056     | 0.644288  | 0            | 1         | 1         |
| Tfb1m_j2      | 0           | 0.226633  | 0            | 1         | 1         |
| Serac1_j3     | 0.809429    | 0.873242  | 0            | 1         | 1         |
| Tmem181a      | 2.23205     | 2.48136   | 0            | 1         | 1         |
| BC049966_j1   | 2.39664     | 2.21323   | 0            | 1         | 1         |
| BC049966_j3   | 0.000604778 | 0.294945  | 0            | 1         | 1         |
| BC049966_j2   | 0.0874937   | 0.087551  | 0            | 1         | 1         |
| AK178082_j1   | 1.12531     | 1.8152    | 0.689806     | 0.25979   | 0.608517  |
| Fndc1_j3      | 0.0665289   | 0.186184  | 1.48467      | 0.144802  | 0.472296  |
| Fndc1_j5      | 0           | 0.0528805 | 1.79769e+308 | 0.0143326 | 1         |
| Fndc1_j4      | 0.224915    | 0.125131  | -0.845943    | 0.0553744 | 0.274836  |
| AK015714_j2   | 0.723185    | 0.721916  | -0.0025332   | 0.984585  | 0.995392  |
| XLOC_014247   | 0.089082    | 0.131286  | 0.559503     | 0.680039  | 1         |
| Qk_j3         | 0.100566    | 0.0277204 | 0            | 1         | 1         |
| Qk_j6         | 2.81814     | 2.45873   | 0            | 1         | 1         |
| Map3k4_j4     | 0.204408    | 0.389773  | 0            | 1         | 1         |
| Slc22a3_j1    | 0.0643327   | 0.076909  | 0.257601     | 0.847905  | 1         |
| Igf2r_j1      | 0.604837    | 0.486446  | 0            | 1         | 1         |
| Wtap_j7       | 0.111244    | 0.159081  | 0            | 1         | 1         |
| Gm16052_j3    | 0           | 0.208256  | 1.79769e+308 | 0.000277  | 0.0050067 |
| Thbs2_j1      | 5.91E-05    | 0.168835  | 11.4813      | 0.835524  | 0.947099  |
| Wdr27_j4      | 0.0276663   | 0.0832354 | 1.58907      | 0.173967  | 1         |
| Wdr27_j5      | 0.0606895   | 0.0729723 | 0.265903     | 0.811715  | 1         |
| Phf10_j6      | 4.8001      | 5.08715   | 0            | 1         | 1         |
| Prdm9_j5      | 0           | 0.126383  | 1.79769e+308 | 0.0037694 | 1         |
| Prdm9_j6      | 0.0305208   | 0.0640395 | 1.06917      | 0.355226  | 1         |
| Has1          | 0.0497617   | 0.10122   | 1.02439      | 0.3823    | 1         |
| Fpr1          | 0.0669335   | 0.097671  | 0.545202     | 0.611191  | 1         |
| Zfp40_j4      | 0.947336    | 1.07705   | 0            | 1         | 1         |
| Zfp13_j3      | 0.544257    | 0.416518  | -0.385911    | 0.508995  | 0.790628  |
| Mmp25_j9      | 0.0644391   | 0.110426  | 0            | 1         | 1         |
| Thoc6_j3      | 0.457661    | 0.56609   | 0.306751     | 0.365594  | 0.699478  |



|                  |            |           |              |           |           |
|------------------|------------|-----------|--------------|-----------|-----------|
| Tbc1d24_j1       | 0.943634   | 1.05739   | 0.164204     | 0.425585  | 0.740579  |
| Tbc1d24_j3       | 0.159101   | 0.0571227 | -1.4778      | 0.0068747 | 0.0649223 |
| Tsc2_j4          | 5.93891    | 7.87009   | 0            | 1         | 1         |
| Slc9a3r2_j3      | 0          | 0.388537  | 0            | 1         | 1         |
| Tbl3             | 7.03241    | 6.50574   | 0            | 1         | 1         |
| Mapk8ip3_j9      | 0.292146   | 0.256695  | 0            | 1         | 1         |
| Cramp1_j3        | 0.152783   | 0.359205  | 0            | 1         | 1         |
| Ube2i_j1         | 35.2559    | 38.6511   | 0.132646     | 0.145622  | 0.473519  |
| Ube2i_j2         | 1.05132    | 0.650271  | -0.693094    | 0.0053378 | 0.0532893 |
| Cacna1h_j10      | 1.33067    | 1.09745   | 0            | 1         | 1         |
| Sox8_j4          | 0.593608   | 0.651267  | 0.133739     | 0.741904  | 0.909559  |
| Rhbdl1_j3        | 0          | 0.0792909 | 1.79769e+308 | 0.0210895 | 1         |
| Wdr90_j15        | 0          | 0.116864  | 1.79769e+308 | 0.110147  | 1         |
| Solh_j5          | 2.77669    | 2.71207   | 0            | 1         | 1         |
| Solh_j7          | 0.201292   | 0.223733  | 0            | 1         | 1         |
| Solh_j6          | 0.474398   | 0.508441  | 0            | 1         | 1         |
| Decr2_j2         | 3.8046     | 3.74548   | -0.0225939   | 0.890794  | 0.965446  |
| Pdia2_j4         | 0.00118691 | 0.24912   | 7.71348      | 0.0900798 | 0.368442  |
| Itfg3_j5         | 0.402906   | 1.64685   | 0            | 1         | 1         |
| Bak1_j4          | 0.0197429  | 0.361693  | 4.19536      | 0.0006385 | 0.0099691 |
| Bak1_j3          | 1.4881     | 1.68429   | 0.178674     | 0.406209  | 0.727726  |
| Grm4_j1          | 0.357704   | 0.583362  | 0            | 1         | 1         |
| Nudt3_j10        | 0          | 0.361521  | 0            | 1         | 1         |
| D17Wsu92e_j1     | 24.1542    | 29.456    | 0            | 1         | 1         |
| Slc26a8_j12      | 0          | 0.0850391 | 1.79769e+308 | 0.0536898 | 1         |
| Slc26a8_j17      | 0          | 0.0556471 | 1.79769e+308 | 0.0891211 | 1         |
| Cpne5_j1         | 0.099475   | 0.22562   | 0            | 1         | 1         |
| Mtch1_j3         | 29.6864    | 32.9473   | 0            | 1         | 1         |
| Mtch1_j4         | 0.406635   | 0.423505  | 0            | 1         | 1         |
| Mtch1_j5         | 5.60903    | 5.98686   | 0            | 1         | 1         |
| XLOC_014368      | 0.372921   | 0.221871  | -0.749148    | 0.410107  | 0.730173  |
| 1110021J02Rik_j2 | 4.66931    | 5.03274   | 0.108134     | 0.502321  | 0.786353  |
| Mdga1_j3         | 1.62901    | 2.67903   | 0            | 1         | 1         |
| Btbd9_j3         | 0.381523   | 0.324362  | 0            | 1         | 1         |
| Glo1_j1          | 0.225635   | 0.272567  | 0.272617     | 0.583312  | 0.833121  |
| Glo1_j4          | 7.70295    | 7.11018   | -0.115527    | 0.673684  | 0.877015  |
| Notch3_j4        | 0.777456   | 0.806889  | 0.0536086    | 0.865394  | 0.957078  |
| Notch3_j5        | 0          | 0.102382  | 1.79769e+308 | 0.0091878 | 1         |
| Notch3_j7        | 0.139245   | 0.318967  | 1.19578      | 0.0013478 | 0.0181675 |
| Notch3_j6        | 0          | 0.151208  | 1.79769e+308 | 3.71E-05  | 1         |
| Ephx3_j1         | 0.0740367  | 0.0543939 | -0.444796    | 0.776482  | 1         |
| Brd4_j5          | 10.2274    | 12.0488   | 0.236446     | 0.0545503 | 0.272439  |
| Brd4             | 4.97597    | 2.82213   | -0.818192    | 6.73E-09  | 4.88E-07  |
| Akap8l_j1        | 0.385288   | 0.620167  | 0.68672      | 0.021375  | 0.147428  |
| Akap8l_j11       | 0.143639   | 0.15882   | 0.144938     | 0.758561  | 0.917041  |
| Wiz_j9           | 0.03177    | 0.0847013 | 1.41472      | 0.170419  | 1         |
| Zfp811_j3        | 0.025198   | 0.066583  | 1.40184      | 0.332561  | 1         |

|               |            |           |              |           |           |
|---------------|------------|-----------|--------------|-----------|-----------|
| Cyp4f14       | 0          | 0.109318  | 1.79769e+308 | 0.003201  | 1         |
| Cyp4f13       | 3.23027    | 3.65069   | 0.176514     | 0.374653  | 0.707294  |
| Cyp4f41-ps_j1 | 0.272062   | 0.158125  | -0.782873    | 0.303331  | 0.649031  |
| Zfp422-rs1_j1 | 0.180482   | 0.195612  | 0.116139     | 0.791621  | 0.930476  |
| Zfp101_j2     | 0.22907    | 0.337282  | 0.558167     | 0.299175  | 0.646115  |
| Hnrnpm_j4     | 0.175964   | 0.251537  | 0            | 1         | 1         |
| Hnrnpm_j3     | 2.60367    | 2.41573   | 0            | 1         | 1         |
| Rab11b_j2     | 0.166809   | 0.0845586 | -0.980177    | 0.0558336 | 0.276186  |
| Rps18_j4      | 43.9154    | 57.1772   | 0            | 1         | 1         |
| H2-Ke6_j7     | 1.57963    | 1.37103   | -0.204325    | 0.612766  | 0.847359  |
| H2-Ke6_j8     | 0.213863   | 0.0586494 | -1.8665      | 0.27833   | 0.627262  |
| Brd2_j6       | 0.975778   | 1.16818   | 0            | 1         | 1         |
| Brd2_j5       | 0          | 0.372488  | 0            | 1         | 1         |
| Btnl5_j1      | 0.0411854  | 0.136526  | 1.72897      | 0.120725  | 1         |
| Btnl6_j7      | 0.0224427  | 0.0482335 | 1.10379      | 0.501589  | 1         |
| Btnl6_j8      | 0.0227003  | 0.0836481 | 1.88162      | 0.277706  | 1         |
| Egfl8_j5      | 0.493631   | 0.537044  | 0.121607     | 0.586995  | 0.834802  |
| Stk19         | 1.62118    | 1.82666   | 0            | 1         | 1         |
| Cfb_j1        | 0.0178164  | 0.064598  | 1.85828      | 0.095842  | 1         |
| Cfb_j3        | 0.0672026  | 0.0274979 | -1.28919     | 0.330706  | 1         |
| Csnk2b_j1     | 21.7301    | 22.7342   | 0.0651673    | 0.694706  | 0.887401  |
| Aif1_j3       | 1.05915    | 2.76103   | 1.38229      | 6.82E-05  | 0.0015531 |
| Vars2_j8      | 0.476614   | 0.493737  | 0.0509225    | 0.869627  | 0.958475  |
| Ddr1          | 0          | 0.111253  | 0            | 1         | 1         |
| Atat1_j2      | 0.632289   | 0.446259  | 0            | 1         | 1         |
| Atat1_j3      | 0.723009   | 0.953591  | 0            | 1         | 1         |
| Abcf1_j1      | 0.00270196 | 0.158141  | 5.87106      | 0.10365   | 0.399185  |
| Prr3          | 4.51875    | 4.42071   | 0            | 1         | 1         |
| Rpp21_j1      | 4.86184    | 6.14553   | 0            | 1         | 1         |
| H2-M1_j2      | 0.0574266  | 0.108094  | 0.912502     | 0.355135  | 1         |
| XLOC_014466   | 0.1133     | 0.146765  | 0.373359     | 0.53332   | 1         |
| Slc25a27_j2   | 0.429011   | 0.475155  | 0.147384     | 0.585793  | 0.834076  |
| XLOC_014482   | 0          | 0.175671  | 1.79769e+308 | 0.0611734 | 0.291875  |
| Cdc5l_j4      | 0.0180535  | 0.120245  | 2.73562      | 0.164849  | 1         |
| Spats1_j3     | 0.131175   | 0.0568006 | -1.20751     | 0.165469  | 1         |
| Tmem151b_j5   | 4.0106     | 4.16123   | 0            | 1         | 1         |
| Slc29a1_j10   | 0          | 0.182985  | 1.79769e+308 | 0.0173828 | 0.12774   |
| Tmem63b_j5    | 2.82716    | 1.99804   | 0            | 1         | 1         |
| Tmem63b_j6    | 0.237604   | 0.157286  | 0            | 1         | 1         |
| Vegfa         | 0.944765   | 0.824918  | 0            | 1         | 1         |
| Tjap1_j1      | 0          | 0.130076  | 0            | 1         | 1         |
| Abcc10_j6     | 0.388314   | 0.534775  | 0.46171      | 0.219802  | 0.566497  |
| Ptk7_j4       | 0.281269   | 0.852754  | 0            | 1         | 1         |
| Klhdc3_j5     | 6.23106    | 6.86874   | 0.140568     | 0.293734  | 0.640534  |
| Klhdc3_j7     | 24.4434    | 24.9271   | 0.0282731    | 0.775046  | 0.923761  |
| Gnmt_j4       | 0.040132   | 0.186873  | 2.21924      | 0.17147   | 0.50851   |
| Gnmt_j3       | 0.261916   | 0.241067  | -0.119674    | 0.815839  | 0.94009   |

|                  |            |           |              |           |           |
|------------------|------------|-----------|--------------|-----------|-----------|
| BC032203_j2      | 0.0813823  | 0.0604239 | 0            | 1         | 1         |
| Ubr2_j3          | 2.18543    | 1.07012   | 0            | 1         | 1         |
| Ubr2_j4          | 1.43798    | 1.28259   | 0            | 1         | 1         |
| Taf8_j1          | 0.889258   | 1.07154   | 0.26901      | 0.413635  | 0.732414  |
| Mdfi             | 0.0327071  | 0.353193  | 3.43278      | 0.0241188 | 0.160269  |
| Foxp4_j5         | 0.460854   | 0.652294  | 0            | 1         | 1         |
| Foxp4_j6         | 0          | 0.133811  | 0            | 1         | 1         |
| Foxp4            | 0          | 0.138439  | 0            | 1         | 1         |
| Nfya_j7          | 0.245076   | 0.683802  | 0            | 1         | 1         |
| XLOC_014524      | 0.352603   | 0.0651012 | 0            | 1         | 1         |
| Daam2_j2         | 1.17857    | 0.719108  | 0            | 1         | 1         |
| Rftn1_j3         | 3.02E-05   | 0.0772026 | 11.3211      | 0.977521  | 1         |
| Rftn1_j4         | 0.00227006 | 0.123391  | 5.76436      | 0.420345  | 1         |
| Satb1_j5         | 1.65702    | 1.63064   | 0            | 1         | 1         |
| Slc5a7           | 0.0275224  | 0.394166  | 3.84012      | 0.0001642 | 0.003256  |
| Pot1b_j4         | 0          | 0.120981  | 1.79769e+308 | 0.007024  | 1         |
| Zfp119_j2        | 0.071684   | 0.0768915 | 0.101173     | 0.913678  | 1         |
| Stap2_j3         | 0.0779722  | 0.260239  | 1.7388       | 0.183522  | 0.524115  |
| Stap2            | 0.0552291  | 0.16482   | 1.57739      | 0.214123  | 0.559445  |
| Sema6b_j2        | 0.358445   | 0.261039  | -0.457486    | 0.334839  | 0.675569  |
| Dpp9_j1          | 7.12786    | 6.09472   | 0            | 1         | 1         |
| Ptprs_j2         | 0.206329   | 0.475119  | 0            | 1         | 1         |
| Rfx2_j3          | 0.024535   | 0.057496  | 1.22862      | 0.370721  | 1         |
| Rfx2_j2          | 0          | 0.0608473 | 1.79769e+308 | 0.0460475 | 1         |
| Gtf2f1_j1        | 0.0626697  | 0.0919424 | 0.552961     | 0.575026  | 1         |
| Dennd1c_j8       | 0          | 0.150721  | 1.79769e+308 | 0.0307589 | 1         |
| Dennd1c_j10      | 0.0880391  | 0.0857227 | -0.0384663   | 0.963592  | 1         |
| Dennd1c_j11      | 0.0418266  | 0.0897188 | 1.10099      | 0.265225  | 1         |
| Gm11110_j2       | 1.01E-05   | 0.200521  | 14.2821      | 0.99222   | 0.997666  |
| Efna5_j3         | 0          | 0.426996  | 0            | 1         | 1         |
| Efna5            | 0.299286   | 0.280677  | 0            | 1         | 1         |
| Vapa_j1          | 40.8587    | 38.7118   | 0            | 1         | 1         |
| 1110012J17Rik_j5 | 4.82048    | 5.96747   | 0.307945     | 0.0282754 | 0.178545  |
| Ptprm_j7         | 0.0561856  | 0         | 0            | 1         | 1         |
| Arhgap28_j4      | 0          | 0.282502  | 0            | 1         | 1         |
| AK044644_j1      | 0.214128   | 0.166253  | -0.365091    | 0.620386  | 0.851093  |
| Ndc80_j2         | 0.0408415  | 0.0768299 | 0.911631     | 1         | 1         |
| Alk_j2           | 0          | 0.0931244 | 1.79769e+308 | 0.0150555 | 1         |
| Alk_j6           | 0.062164   | 0.1718    | 1.46658      | 1         | 1         |
| Srd5a2_j1        | 0          | 0.550501  | 1.79769e+308 | 1.14E-06  | 4.62E-05  |
| Srd5a2_j2        | 1.71305    | 0.254525  | -2.75069     | 4.39E-10  | 3.89E-08  |
| Strn_j1          | 0.360248   | 0.607301  | 0.75342      | 0.0058079 | 0.0570593 |
| Cebpz_j1         | 1.3274     | 0.859792  | -0.626542    | 0.0142418 | 0.110857  |
| Hnrpll_j1        | 1.90074    | 0.902556  | -1.07448     | 0.0077786 | 0.0711414 |
| Sfrs7_j2         | 3.79329    | 4.56272   | 0            | 1         | 1         |
| Sfrs7_j1         | 0.413532   | 0.677559  | 0            | 1         | 1         |
| Dhx57_j2         | 0.346847   | 0.525991  | 0            | 1         | 1         |

|             |           |           |              |           |           |
|-------------|-----------|-----------|--------------|-----------|-----------|
| Sos1_j1     | 6.71652   | 5.90321   | 0            | 1         | 1         |
| Cdkl4_j2    | 0.268206  | 0.105077  | -1.35189     | 0.0663643 | 0.307724  |
| Map4k3_j7   | 0.19126   | 0.169133  | 0            | 1         | 1         |
| Map4k3      | 1.93584   | 1.86661   | 0            | 1         | 1         |
| Thumpd2_j5  | 0.208855  | 0.233474  | 0.160766     | 0.80114   | 0.933726  |
| Slc8a1_j5   | 0.130336  | 0.373806  | 1.52005      | 0.0025639 | 0.0304354 |
| Slc8a1_j6   | 0         | 0.144066  | 1.79769e+308 | 0.0102057 | 1         |
| XLOC_014639 | 0.0621534 | 0.0737753 | 0.247303     | 0.842868  | 1         |
| XLOC_014639 | 0.0394618 | 0.113583  | 1.52522      | 0.332472  | 1         |
| Fbxo11_j2   | 9.38018   | 10.0971   | 0            | 1         | 1         |
| Lhcgr_j6    | 0.357138  | 0.263848  | -0.436776    | 0.606516  | 0.845067  |
| Nrxn1_j10   | 0.483937  | 1.55226   | 0            | 1         | 1         |
| Nrxn1_j13   | 0.760823  | 0.144208  | 0            | 1         | 1         |
| Scaf8_j3    | 0.0107301 | 0.282492  | 0            | 1         | 1         |
| Scaf8_j4    | 0.650869  | 0.921985  | 0            | 1         | 1         |
| Tiam2_j4    | 0.0308588 | 0.212893  | 0            | 1         | 1         |
| XLOC_013763 | 0         | 0.260605  | 1.79769e+308 | 0.002663  | 0.0313742 |
| XLOC_013763 | 0.195757  | 0.220241  | 0.170021     | 0.710395  | 0.894498  |
| Arid1b_j2   | 0.0630555 | 0.176094  | 0            | 1         | 1         |
| Zdhhc14_j1  | 1.76981   | 1.67365   | -0.0805981   | 0.668261  | 0.874424  |
| Zdhhc14_j2  | 6.18432   | 5.56615   | -0.151934    | 0.453287  | 0.758028  |
| Snx9_j5     | 3.4352    | 0.496474  | 0            | 1         | 1         |
| Synj2_j3    | 0         | 0.154418  | 0            | 1         | 1         |
| Synj2_j6    | 0.0985411 | 0.250751  | 0            | 1         | 1         |
| Tulp4_j1    | 0         | 0.0648429 | 1.79769e+308 | 0.0011794 | 1         |
| Sytl3_j1    | 0.303499  | 0.303671  | 0            | 1         | 1         |
| Rps6ka2_j5  | 12.448    | 12.3181   | 0            | 1         | 1         |
| Fgfr1op_j3  | 1.48908   | 2.21264   | 0.571348     | 0.149244  | 0.478453  |
| Sft2d1_j3   | 1.67493   | 1.61123   | -0.0559392   | 0.777789  | 0.9249    |
| XLOC_013790 | 0.0383611 | 0.151861  | 1.98504      | 0.127209  | 1         |
| Park2_j4    | 0.989923  | 0.459768  | -1.10641     | 0.0076168 | 0.0701621 |
| Agpat4_j3   | 0.290258  | 0.540764  | 0            | 1         | 1         |
| AK029100_j2 | 0.626007  | 0.555268  | 0            | 1         | 1         |
| Airn_j1     | 0.88175   | 0.902508  | 0            | 1         | 1         |
| Tcp1        | 10.4622   | 10.9318   | 0.0633363    | 0.617682  | 0.84955   |
| Sod2_j2     | 3.30135   | 2.88821   | -0.192882    | 0.214139  | 0.559445  |
| Mllt4_j3    | 1.06449   | 1.0455    | 0            | 1         | 1         |
| Mllt4_j10   | 0.359953  | 0.697826  | 0            | 1         | 1         |
| BC002059_j1 | 1.95826   | 2.17751   | 0.15311      | 0.37747   | 0.70922   |
| Lix1_j1     | 9.47809   | 5.3233    | 0            | 1         | 1         |
| Lix1_j5     | 42.8754   | 42.6686   | 0            | 1         | 1         |
| Zfp948_j2   | 0.452834  | 1.2906    | 0            | 1         | 1         |
| Zfp760_j1   | 0.266707  | 0.548754  | 0            | 1         | 1         |
| Rnps1_j5    | 0.202147  | 0.190855  | -0.0829249   | 0.856737  | 0.954683  |
| Pkd1_j8     | 5.11904   | 5.21598   | 0            | 1         | 1         |
| Zfp598_j2   | 0.0708194 | 0.172192  | 0            | 1         | 1         |
| Zfp598      | 0.751414  | 0.669792  | 0            | 1         | 1         |

|                  |           |           |              |           |           |
|------------------|-----------|-----------|--------------|-----------|-----------|
| Clcn7_j1         | 0.628667  | 0.576334  | -0.125391    | 0.725707  | 0.902548  |
| Unkl_j3          | 0.628526  | 0.726114  | 0            | 1         | 1         |
| Ccdc78_j2        | 0.0795097 | 0.0952072 | 0.25994      | 0.787109  | 1         |
| Axin1_j1         | 0         | 0.064173  | 1.79769e+308 | 0.0485342 | 1         |
| Rgs11_j2         | 10.9137   | 11.054    | 0.0184281    | 0.871098  | 0.959006  |
| A930001N09Rik_j1 | 0.362232  | 0.362168  | 0            | 1         | 1         |
| Kifc5b_j6        | 0.16857   | 0.0546851 | -1.62413     | 0.201844  | 0.545319  |
| Zbtb9_j2         | 0.17127   | 0.365524  | 0            | 1         | 1         |
| Zbtb9_j3         | 0.781737  | 1.61854   | 0            | 1         | 1         |
| Pacsin1_j1       | 17.1375   | 14.2134   | 0            | 1         | 1         |
| Anks1            | 0.757146  | 1.03066   | 0            | 1         | 1         |
| Anks1_j1         | 0.195761  | 0         | 0            | 1         | 1         |
| XLOC_013910      | 0.0341894 | 0.107789  | 0            | 1         | 1         |
| Scube3_j7        | 0.0456539 | 0.0854142 | 0.903739     | 0.556295  | 1         |
| Zfp523_j1        | 1.41048   | 1.14437   | -0.301636    | 0.325628  | 0.668942  |
| Zfp523_j2        | 0         | 0.114028  | 1.79769e+308 | 0.0284167 | 1         |
| Def6_j1          | 4.52833   | 4.81546   | 0            | 1         | 1         |
| Def6_j2          | 1.3512    | 1.46923   | 0            | 1         | 1         |
| Fance_j7         | 0         | 0.483909  | 1.79769e+308 | 0.0004881 | 0.0079814 |
| Mapk14_j1        | 0.0477377 | 0.0535896 | 0            | 1         | 1         |
| XLOC_013921      | 0.0355063 | 0.143892  | 2.01884      | 0.23436   | 1         |
| Brpf3_j4         | 0.0512824 | 0.159886  | 0            | 1         | 1         |
| BC004004_j1      | 7.18402   | 6.47089   | 0            | 1         | 1         |
| BC004004_j2      | 0.472816  | 1.42784   | 0            | 1         | 1         |
| Pi16_j4          | 0.705392  | 0.655242  | -0.106398    | 0.877426  | 0.96086   |
| Fgd2_j2          | 0.0436515 | 0.071133  | 0.704488     | 0.515666  | 1         |
| Slc37a1_j3       | 1.70933   | 3.41944   | 0            | 1         | 1         |
| Slc37a1_j4       | 1.70483   | 2.72224   | 0            | 1         | 1         |
| Rrp1b_j6         | 0         | 0.285628  | 1.79769e+308 | 3.96E-05  | 0.0009791 |
| Cyp4f16_j1       | 0.0237896 | 0.166394  | 0            | 1         | 1         |
| Cyp4f16_j5       | 1.01889   | 0.914608  | 0            | 1         | 1         |
| Pram1_j6         | 0.0552834 | 0.166958  | 1.59457      | 0.0084367 | 0.075503  |
| Kank3_j3         | 0.097891  | 0.164228  | 0.74645      | 0.189125  | 0.530685  |
| Ndufa7_j3        | 35.417    | 37.8267   | 0.0949624    | 0.657695  | 0.869616  |
| Rgl2_j7          | 8.52187   | 8.45572   | -0.0112426   | 0.919928  | 0.974885  |
| XLOC_013965      | 0.0804537 | 0.21454   | 1.41501      | 0.264391  | 0.613354  |
| Rxrb_j1          | 0.0272131 | 0.186953  | 2.7803       | 0.0006043 | 0.0095415 |
| Col11a2_j7       | 0.397606  | 0.667724  | 0.747912     | 0.151281  | 0.48235   |
| Tnxb_j10         | 0.420364  | 0.351031  | -0.260041    | 0.395208  | 0.720391  |
| Tnxb_j11         | 0.0426871 | 0.103449  | 1.27704      | 0.158566  | 1         |
| Lsm2             | 1.93409   | 2.22169   | 0.200002     | 0.497351  | 0.783786  |
| D17H6S56E-3_j5   | 0.0103215 | 0.657118  | 0            | 1         | 1         |
| D17H6S56E-3_j6   | 2.99831   | 3.59117   | 0            | 1         | 1         |
| Ddah2_j3         | 0.216389  | 0.517806  | 0            | 1         | 1         |
| Abhd16a_j2       | 5.17528   | 8.39713   | 0.698261     | 0.002717  | 0.0319027 |
| Gpank1_j1        | 4.2312    | 3.8447    | -0.138193    | 0.515489  | 0.794259  |
| Gpank1           | 1.17496   | 1.69168   | 0.525838     | 0.0925122 | 0.374266  |

|               |           |           |              |           |           |
|---------------|-----------|-----------|--------------|-----------|-----------|
| Gpank1_j2     | 0.709314  | 0.737806  | 0.0568171    | 0.893809  | 0.966325  |
| Bat3_j1       | 4.2946    | 4.95795   | 0            | 1         | 1         |
| Bat3_j8       | 0.0930476 | 0.0587628 | 0            | 1         | 1         |
| Bat3_j12      | 3.07459   | 3.32155   | 0            | 1         | 1         |
| Bat3_j15      | 0.270948  | 0.420113  | 0            | 1         | 1         |
| Bat3_j18      | 1.83945   | 4.12921   | 0            | 1         | 1         |
| Cchcr1_j2     | 0.048999  | 0.266978  | 2.4459       | 0.0062799 | 0.0606932 |
| Dhx16_j1      | 0.208082  | 0.703045  | 0            | 1         | 1         |
| XLOC_014028   | 0.0466218 | 0.145039  | 1.63736      | 0.0949373 | 1         |
| Gabbr1_j3     | 22.7135   | 20.0879   | 0            | 1         | 1         |
| Gabbr1_j5     | 0.740254  | 1.08108   | 0            | 1         | 1         |
| RP23-98F21.10 | 1.8286    | 2.00634   | 0.133827     | 0.610924  | 0.84666   |
| Gpr116_j7     | 0.0913092 | 0         | 0            | 1         | 1         |
| Gpr116_j8     | 0.0945527 | 0.0913051 | 0            | 1         | 1         |
| Cyp39a1_j1    | 1.87236   | 1.45989   | -0.358995    | 0.241807  | 0.58895   |
| XLOC_014063   | 0.0585666 | 0.115751  | 0.982869     | 0.177379  | 1         |
| Zfp318_j3     | 0.432323  | 0.613377  | 0            | 1         | 1         |
| Pex6_j3       | 0         | 0.180254  | 0            | 1         | 1         |
| Mrps10_j2     | 1.0907    | 0.99668   | 0            | 1         | 1         |
| Mrps10_j4     | 0.458928  | 0.418533  | 0            | 1         | 1         |
| Guca1b_j1     | 0.0440036 | 0.138323  | 1.65234      | 0.138586  | 1         |
| Usp49_j6      | 0.349949  | 0.301417  | 0            | 1         | 1         |
| Frs3          | 5.09611   | 4.58141   | 0            | 1         | 1         |
| Tcfef_j1      | 0         | 0.0489639 | 1.79769e+308 | 0.149496  | 1         |
| Tcfef_j4      | 0.411778  | 0.559816  | 0.443085     | 0.661454  | 0.871676  |
| Trem1_j1      | 0.069385  | 0.10259   | 0.564199     | 0.661047  | 1         |
| Kat2b_j5      | 5.98505   | 5.59763   | -0.0965494   | 0.529046  | 0.802307  |
| Zfp959_j4     | 0.397726  | 0.1686    | -1.23817     | 0.237031  | 0.583799  |
| Ccdc94_j2     | 0         | 0.0903665 | 1.79769e+308 | 0.128431  | 1         |
| Mpnd_j1       | 19.1852   | 19.6225   | 0.0325136    | 0.734198  | 0.906268  |
| Mpnd_j5       | 14.8549   | 12.7984   | -0.21497     | 0.0856177 | 0.357343  |
| Uhrf1_j1      | 0         | 0.0821665 | 1.79769e+308 | 0.111838  | 1         |
| Kdm4b_j9      | 0         | 0.0658691 | 1.79769e+308 | 0.0846149 | 1         |
| Kdm4b_j11     | 0.795124  | 0.179711  | -2.1455      | 0.001779  | 0.0227594 |
| Tmem146_j4    | 0         | 0.0572972 | 1.79769e+308 | 0.163112  | 1         |
| Dus3l_j7      | 5.13925   | 6.55754   | 0            | 1         | 1         |
| Alkbh7_j2     | 3.46654   | 5.8819    | 0.762784     | 0.0717547 | 0.322189  |
| Trip10        | 1.86576   | 1.67178   | 0            | 1         | 1         |
| Cntnap5c_j1   | 0         | 0.130974  | 1.79769e+308 | 0.0056943 | 1         |
| Fert2_j6      | 0.66051   | 1.01369   | 0            | 1         | 1         |
| ORF19_j1      | 0         | 0.0566497 | 0            | 1         | 1         |
| Lama1_j5      | 0.0905389 | 0.0825969 | -0.132451    | 0.869576  | 1         |
| L3mbtl4_j6    | 0         | 0.0754818 | 1.79769e+308 | 0.079592  | 1         |
| L3mbtl4_j7    | 0         | 0.09463   | 1.79769e+308 | 0.0568355 | 1         |
| L3mbtl4_j10   | 0         | 0.0734849 | 1.79769e+308 | 0.0588287 | 1         |
| Epb4.1l3_j4   | 1.09976   | 1.41671   | 0            | 1         | 1         |
| Epb4.1l3_j7   | 62.0115   | 61.1299   | 0            | 1         | 1         |

|                  |            |           |              |           |           |
|------------------|------------|-----------|--------------|-----------|-----------|
| mKIAA0007_j1     | 0.0349384  | 0.120106  | 1.78142      | 0.143383  | 1         |
| Fam179a_j6       | 0          | 0.0752695 | 1.79769e+308 | 0.0268473 | 1         |
| Clip4_j1         | 0.404709   | 6.30696   | 0            | 1         | 1         |
| Clip4_j8         | 4.19932    | 3.96607   | 0            | 1         | 1         |
| Ypel5_j2         | 13.8269    | 14.1983   | 0            | 1         | 1         |
| Lbh_j2           | 1.91561    | 9.51275   | 0            | 1         | 1         |
| Ehd3_j2          | 0          | 0.099215  | 0            | 1         | 1         |
| Yipf4_j1         | 15.733     | 11.1754   | 0            | 1         | 1         |
| Birc6_j4         | 0.158531   | 0.227302  | 0.519845     | 0.608315  | 0.845627  |
| Birc6_j6         | 0.0978848  | 0.121926  | 0.316855     | 0.718501  | 1         |
| Birc6_j7         | 0.768198   | 0.681803  | -0.172125    | 0.41698   | 0.734121  |
| Ltbp1_j5         | 0.0669752  | 0.209251  | 0            | 1         | 1         |
| Rasgrp3_j2       | 0          | 0.0879425 | 1.79769e+308 | 0.0168341 | 1         |
| Rasgrp3_j3       | 0.289308   | 0.440344  | 0.606026     | 0.167528  | 0.504072  |
| Ccdc75_j1        | 2.43556    | 3.07207   | 0.334961     | 0.203194  | 0.547149  |
| Fam82a1_j4       | 0.151562   | 0.531807  | 1.81099      | 0.0002322 | 0.0043373 |
| Fam82a1_j6       | 0.23654    | 0.0782154 | -1.59656     | 0.13192   | 0.451901  |
| Galm_j1          | 2.50821    | 1.67199   | -0.585094    | 0.0302922 | 0.18692   |
| Arhgef33_j4      | 0.0424015  | 0.250172  | 2.56073      | 0.195642  | 0.538158  |
| XLOC_014188      | 0          | 0.130418  | 1.79769e+308 | 0.110353  | 1         |
| XLOC_014189      | 0.0196763  | 0.0750721 | 0            | 1         | 1         |
| Mta3_j1          | 0          | 0.298885  | 0            | 1         | 1         |
| 1700106N22Rik_j2 | 0.374063   | 0.556221  | 0.572377     | 0.365192  | 0.699035  |
| Prkce_j1         | 0          | 0.0729165 | 0            | 1         | 1         |
| 1700090G07Rik_j3 | 0.00260581 | 0.123229  | 5.56346      | 0.429527  | 1         |
| 1700090G07Rik_j2 | 0.0509112  | 0.0913637 | 0.843638     | 0.5358    | 1         |
| XLOC_014206      | 0          | 0.0750445 | 1.79769e+308 | 0.162204  | 1         |
| Msh6_j2          | 0.330933   | 0.285337  | 0            | 1         | 1         |
| XLOC_014209      | 0          | 0.107428  | 1.79769e+308 | 0.0756024 | 1         |
| Ston1_j2         | 1.39025    | 1.74385   | 0            | 1         | 1         |
| Ston1_j6         | 0          | 0.141318  | 0            | 1         | 1         |
| Adcyap1_j3       | 18.3176    | 34.2872   | 0            | 1         | 1         |
| Pisd-ps2_j5      | 0          | 0.467722  | 1.79769e+308 | 1.08E-06  | 4.40E-05  |
| Pisd-ps2_j4      | 0.730031   | 0.731148  | 0.00220469   | 0.993823  | 0.99826   |
| Pisd-ps2_j13     | 0          | 0.0928859 | 1.79769e+308 | 0.0946818 | 1         |
| Tfb1m_j3         | 4.04313    | 4.49436   | 0            | 1         | 1         |
| BC049966_j1      | 0.568523   | 0.787979  | 0            | 1         | 1         |
| Tmem181c-ps_j4   | 2.32755    | 2.88749   | 0.310999     | 0.235743  | 0.582976  |
| AK037830_j1      | 0.0180948  | 0.0757182 | 0            | 1         | 1         |
| Fndc1_j2         | 0.141608   | 0.290836  | 1.03831      | 0.189839  | 0.531646  |
| Pacrg_j1         | 2.22797    | 2.45757   | 0.141505     | 0.67818   | 0.879011  |
| Map3k4_j2        | 0.838235   | 0.678232  | 0            | 1         | 1         |
| Slc22a3_j7       | 0          | 0.129485  | 1.79769e+308 | 0.101492  | 1         |
| Mas1_j1          | 0.304366   | 0.27295   | 0            | 1         | 1         |
| Pnlcd1_j4        | 0.0603881  | 0.0369111 | -0.710209    | 0.709892  | 1         |
| Wtap_j1          | 0.0721621  | 0.0763381 | 0            | 1         | 1         |
| Wtap_j5          | 2.63249    | 2.23712   | 0            | 1         | 1         |

|             |           |           |               |           |           |
|-------------|-----------|-----------|---------------|-----------|-----------|
| Tcte2_j4    | 0.330176  | 0.176012  | -0.907566     | 0.27944   | 0.628153  |
| Dact2_j2    | 0         | 0.261118  | 1.79769e+308  | 0.000865  | 0.0127263 |
| Phf10_j3    | 0.851577  | 1.21139   | 0             | 1         | 1         |
| Dll1_j1     | 0.114825  | 0.045964  | -1.32087      | 0.291713  | 1         |
| Psemb1_j1   | 0         | 0.111522  | 1.79769e+308  | 0.11931   | 1         |
| Psemb1_j2   | 0.353614  | 0.380277  | 0.104876      | 0.863156  | 0.956634  |
| Prdm9_j1    | 0.201284  | 0.25608   | 0.347361      | 0.554632  | 0.817684  |
| Prdm9_j4    | 0.0826718 | 0.353133  | 2.09475       | 0.0005705 | 0.0091003 |
| Lnpep_j2    | 3.3444    | 2.79054   | 0             | 1         | 1         |
| Zfp945_j3   | 0.542246  | 0.422414  | 0             | 1         | 1         |
| Zfp945_j2   | 0.0484877 | 0.0930663 | 0             | 1         | 1         |
| Zfp13       | 1.49523   | 1.64603   | 0.138626      | 0.569621  | 0.825926  |
| Mmp25_j6    | 0.0442893 | 0.089303  | 0             | 1         | 1         |
| Amdhd2_j2   | 0.892061  | 1.59491   | 0             | 1         | 1         |
| Tbc1d24_j13 | 0.089058  | 0.145733  | 0.71051       | 0.15102   | 1         |
| Tbc1d24_j14 | 0.0869945 | 0.823531  | 3.24283       | 0         | 0         |
| Ccnf_j2     | 0.0618011 | 0.121155  | 0.971145      | 0.247694  | 1         |
| Abca17_j5   | 0         | 0.069754  | 1.79769e+308  | 0.0592049 | 1         |
| E4f1_j1     | 0.104168  | 0.181386  | 0.800154      | 0.140867  | 0.466831  |
| E4f1_j11    | 0.225394  | 0.216001  | -0.0614123    | 0.924951  | 0.976661  |
| Mlst8_j3    | 2.31958   | 4.08377   | 0             | 1         | 1         |
| Rab26       | 0.323711  | 0.296195  | -0.12816      | 0.777513  | 0.924737  |
| Tsc2_j3     | 0.854628  | 1.75886   | 0             | 1         | 1         |
| Slc9a3r2_j4 | 17.4127   | 17.5291   | 0             | 1         | 1         |
| Slc9a3r2_j5 | 7.82019   | 7.98157   | 0             | 1         | 1         |
| Tbl3_j1     | 0.386597  | 0.46595   | 0             | 1         | 1         |
| Tbl3_j5     | 1.25375   | 1.26701   | 0             | 1         | 1         |
| Mapk8ip3_j8 | 2.37466   | 2.00851   | 0             | 1         | 1         |
| Cramp1_j1   | 0.0558206 | 0.0558572 | 0             | 1         | 1         |
| Ube2i_j4    | 0.0415048 | 0.0853336 | 1.03984       | 0.116914  | 1         |
| Cacna1h_j8  | 1.41077   | 2.19129   | 0             | 1         | 1         |
| Cacna1h_j9  | 4.28299   | 4.1474    | 0             | 1         | 1         |
| Sox8_j5     | 0.155176  | 0.16932   | 0.125845      | 0.856105  | 0.954521  |
| Fam173a_j2  | 9.64018   | 8.62961   | -0.159765     | 0.367759  | 0.701102  |
| Stub1_j3    | 4.10561   | 5.32429   | 0.374995      | 0.221748  | 0.568888  |
| Stub1_j4    | 2.59511   | 2.697     | 0.055562      | 0.852467  | 0.953253  |
| Rhbdl1_j4   | 0         | 0.0855692 | 1.79769e+308  | 0.009936  | 1         |
| Wdr90_j14   | 0.0814096 | 0.145358  | 0.836338      | 0.528142  | 1         |
| Fam195a_j3  | 0.0935134 | 0         | -1.79769e+308 | 0.0618915 | 1         |
| Fam195a_j2  | 0.418693  | 0.64822   | 0.630591      | 0.331367  | 0.673024  |
| Rab40C_j3   | 6.70636   | 7.50262   | 0             | 1         | 1         |
| Nme4_j1     | 0.049879  | 0.154863  | 1.63449       | 0.272069  | 1         |
| Pdia2_j9    | 32.2413   | 40.4339   | 0.326657      | 0.0003543 | 0.0061132 |
| Itfg3_j1    | 1.61832   | 1.78216   | 0             | 1         | 1         |
| Grm4_j2     | 0.0865862 | 0.0952412 | 0             | 1         | 1         |
| Nudt3_j6    | 0.795127  | 1.9389    | 0             | 1         | 1         |
| Tead3_j1    | 0.220953  | 0.351213  | 0.668606      | 0.22728   | 0.574435  |



|             |             |                 |              |           |           |
|-------------|-------------|-----------------|--------------|-----------|-----------|
| Tead3_j4    | 0.2629      | 0.348615        | 0.407124     | 0.493345  | 0.781804  |
| XLOC_014361 | 0.185208    | 0.348895        | 0.913642     | 0.193354  | 0.535696  |
| XLOC_014361 | 0           | 0.219305        | 1.79769e+308 | 0.0077026 | 0.0707384 |
| Stk38_j1    | 2.06103     | 1.2836          | 0            | 1         | 1         |
| Stk38_j2    | 0.15726     | 0.203902        | 0            | 1         | 1         |
| Cpne5_j2    | 0.217726    | 0.670837        | 0            | 1         | 1         |
| Cpne5_j3    | 0.0877662   | 0.914003        | 0            | 1         | 1         |
| Mtch1_j1    | 40.6223     | 39.5092         | 0            | 1         | 1         |
| Mtch1_j2    | 82.8188     | 102.281         | 0            | 1         | 1         |
| XLOC_014368 | 0.000205249 | 0.116126        | 9.1441       | 0.954032  | 1         |
| Btbd9_j6    | 0.414147    | 0.502885        | 0            | 1         | 1         |
| Btbd9_j7    | 0.379551    | 0.308746        | 0            | 1         | 1         |
| Hsf2bp      | 0.048266    | 0 -1.79769e+308 |              | 0.0662395 | 1         |
| Notch3_j1   | 0.190499    | 0.333271        | 0.806917     | 0.132062  | 0.4522    |
| Notch3_j12  | 0.380081    | 0.436906        | 0.201014     | 0.589244  | 0.836005  |
| Ephx3_j2    | 0           | 0.138616        | 1.79769e+308 | 0.0835147 | 1         |
| Brd4_j4     | 0.617786    | 1.92283         | 1.63805      | 6.08E-14  | 1.04E-11  |
| Akap8l_j6   | 3.38965     | 4.90044         | 0.531774     | 1.63E-05  | 0.0004695 |
| Rasal3_j8   | 0.103287    | 0.0423376       | -1.28665     | 0.231402  | 1         |
| Rasal3_j7   | 0.000132487 | 0.0646828       | 8.93139      | 0.849941  | 1         |
| Zfp101_j1   | 0.00543988  | 0.264497        | 5.60353      | 0.0315283 | 0.191971  |
| Hnrnpm_j1   | 0.446353    | 0.889285        | 0            | 1         | 1         |
| Angptl4_j3  | 0.212635    | 0.25102         | 0.239421     | 0.767892  | 0.920914  |
| H2-K1_j1    | 39.1868     | 40.3079         | 0.0406966    | 0.668623  | 0.874544  |
| H2-K1_j2    | 2.46918     | 2.44979         | -0.0113761   | 0.966279  | 0.990343  |
| H2-Ke6_j2   | 7.00461     | 6.95956         | -0.0093099   | 0.922881  | 0.975936  |
| H2-Ke6_j1   | 0.21071     | 0.240279        | 0.189452     | 0.575828  | 0.828497  |
| Brd2        | 2.64247     | 1.53182         | 0            | 1         | 1         |
| Psmb9_j2    | 0.334746    | 0.271559        | -0.301804    | 0.764384  | 0.919203  |
| Btln5_j2    | 0.0512039   | 0.189063        | 1.88454      | 0.0552986 | 0.274555  |
| Egfl8_j7    | 34.9476     | 37.348          | 0.0958376    | 0.352994  | 0.689667  |
| C4b_j1      | 0.368969    | 0.575937        | 0            | 1         | 1         |
| Skiv2l_j3   | 0.21296     | 1.49168         | 0            | 1         | 1         |
| Skiv2l_j7   | 9.86515     | 9.90997         | 0            | 1         | 1         |
| Cfb_j2      | 0.0561522   | 0.321669        | 2.51816      | 0.0046082 | 0.0477666 |
| C2_j2       | 0.361252    | 0.568835        | 0.655002     | 0.227684  | 0.574755  |
| C2_j3       | 0.286611    | 0.258121        | -0.151049    | 0.799818  | 0.933137  |
| Csnk2b      | 2.39848     | 1.78959         | -0.422496    | 0.305094  | 0.650175  |
| Mrps18b_j2  | 0.185789    | 0.713446        | 0            | 1         | 1         |
| Abcf1_j2    | 0.558886    | 0.148116        | -1.91583     | 0.000896  | 0.0131199 |
| H2-T9_j4    | 0           | 0.0616104       | 0            | 1         | 1         |
| H2-M1_j8    | 0           | 0.160111        | 1.79769e+308 | 0.0258296 | 0.168201  |
| Ppp1r11_j4  | 0           | 0.0618785       | 0            | 1         | 1         |
| Crisp1_j1   | 0.0764864   | 0.140907        | 0.881463     | 0.494451  | 1         |
| XLOC_014477 | 0.0268263   | 0.12532         | 2.2239       | 0.146218  | 1         |
| XLOC_014477 | 0.105939    | 0.13563         | 0.356443     | 0.801337  | 1         |
| Slc25a27_j5 | 6.51062     | 7.27452         | 0.160057     | 0.299239  | 0.646119  |

|                  |           |           |              |           |           |
|------------------|-----------|-----------|--------------|-----------|-----------|
| XLOC_014482      | 0.0831482 | 0.271465  | 1.70701      | 0.148778  | 0.477613  |
| Cdc5l_j11        | 5.03048   | 3.84506   | -0.387692    | 0.118556  | 0.428569  |
| Tmem151b_j4      | 2.9742    | 3.11724   | 0            | 1         | 1         |
| Slc29a1_j2       | 1.6239    | 1.72787   | 0.0895357    | 0.761921  | 0.918069  |
| Tmem63b_j7       | 2.18831   | 1.58721   | 0            | 1         | 1         |
| Tmem63b          | 7.87616   | 9.79387   | 0            | 1         | 1         |
| XLOC_014494      | 0.0590725 | 0.0973374 | 0.720508     | 0.564703  | 1         |
| Mad2l1bp_j1      | 0         | 0.0784439 | 0            | 1         | 1         |
| Tjap1            | 0.0329332 | 0.109297  | 0            | 1         | 1         |
| Abcc10_j5        | 0.0635384 | 0.0640154 | 0.0107901    | 0.990312  | 1         |
| Srf_j1           | 3.88993   | 4.35114   | 0.161647     | 0.314303  | 0.658565  |
| Ptk7_j1          | 0.541114  | 0.508768  | 0            | 1         | 1         |
| Ptk7_j2          | 0         | 0.520593  | 0            | 1         | 1         |
| Ptk7_j3          | 0.106872  | 0.450701  | 0            | 1         | 1         |
| Klc4_j4          | 0.10346   | 0.0650093 | 0            | 1         | 1         |
| Ptcra_j2         | 0.176888  | 0.12393   | -0.513315    | 0.522093  | 0.79866   |
| BC032203_j3      | 1.76439   | 2.71537   | 0            | 1         | 1         |
| Prickle4_j3      | 4.47997   | 5.87958   | 0.392223     | 0.0278328 | 0.17685   |
| Foxp4_j2         | 0         | 0.501524  | 0            | 1         | 1         |
| XLOC_014524      | 0.371259  | 0.539557  | 0            | 1         | 1         |
| XLOC_014524      | 0.340207  | 0.538844  | 0            | 1         | 1         |
| Tbc1d5_j1        | 0.0879721 | 0.0983991 | 0            | 1         | 1         |
| Pot1b_j7         | 0.270136  | 0.272744  | 0.0138593    | 0.976156  | 0.993133  |
| XLOC_014550      | 0.393126  | 0.713904  | 0.860739     | 0.175732  | 0.514267  |
| Safb2_j3         | 0.751854  | 1.31586   | 0            | 1         | 1         |
| Lonp1_j1         | 1.64003   | 1.99641   | 0            | 1         | 1         |
| Rfx2_j5          | 0.0511456 | 0.100315  | 0.971855     | 0.568719  | 1         |
| Khsrp_j1         | 0         | 0.283432  | 0            | 1         | 1         |
| Khsrp_j2         | 0.348986  | 0.550291  | 0            | 1         | 1         |
| Slc25a23_j2      | 1.9362    | 2.61617   | 0            | 1         | 1         |
| Dennd1c_j3       | 0         | 0.213783  | 1.79769e+308 | 0.0253142 | 0.165753  |
| Dennd1c_j4       | 0         | 0.095502  | 1.79769e+308 | 0.0838913 | 1         |
| Dennd1c_j5       | 0.0256472 | 0.223925  | 3.12614      | 0.0186959 | 0.134649  |
| Gpr108_j1        | 5.95524   | 8.95896   | 0            | 1         | 1         |
| Nudt12_j1        | 1.3308    | 1.33535   | 0.00493344   | 0.983765  | 0.995196  |
| Fbxl17_j2        | 0         | 0.651026  | 1.79769e+308 | 0.0027755 | 0.0323714 |
| Fbxl17_j3        | 4.40911   | 4.22203   | -0.0625528   | 0.806659  | 0.936053  |
| Fbxl17_j4        | 13.999    | 14.2367   | 0.0242866    | 0.854021  | 0.953758  |
| Vapa_j3          | 0.581812  | 0.722101  | 0            | 1         | 1         |
| Rab31_j2         | 5.25294   | 7.59011   | 0            | 1         | 1         |
| Ankrd12_j1       | 0.100287  | 0.246335  | 1.29649      | 0.129033  | 0.447615  |
| Ndufv2_j1        | 81.7996   | 66.995    | 0            | 1         | 1         |
| 1110012J17Rik_j2 | 0.238981  | 0.368935  | 0.62647      | 0.154084  | 0.487083  |
| Arhgap28_j2      | 0.502697  | 0.544117  | 0            | 1         | 1         |
| Tgif1            | 0.309442  | 0.699002  | 1.17563      | 0.0184056 | 0.133129  |
| Smchd1_j4        | 0.78498   | 0.683299  | 0            | 1         | 1         |
| Alk_j1           | 0.0764215 | 0.0836351 | 0.130132     | 0.856932  | 1         |

|                  |           |            |               |           |          |
|------------------|-----------|------------|---------------|-----------|----------|
| Xdh_j1           | 2.23E-05  | 0.485631   | 0             | 1         | 1        |
| Memo1_j9         | 8.71889   | 14.347     | 0             | 1         | 1        |
| Eif2ak2_j1       | 3.17881   | 2.69595    | -0.237694     | 0.0763606 | 0.333862 |
| Eif2ak2_j2       | 0.412071  | 1.14397    | 1.47308       | 1.51E-10  | 1.48E-08 |
| Atl2_j3          | 2.99586   | 3.41232    | 0.187783      | 0.358015  | 0.693676 |
| Dhx57_j6         | 0.0481125 | 0.3696     | 0             | 1         | 1        |
| Sos1_j2          | 0         | 1.20905    | 0             | 1         | 1        |
| Slc8a1_j7        | 0         | 0.145148   | 1.79769e+308  | 0.0110838 | 1        |
| AK135560_j1      | 0.319444  | 0.263623   | 0             | 1         | 1        |
| XLOC_014651      | 2.03133   | 1.65436    | 0             | 1         | 1        |
| Kcnk12_j2        | 0.0101175 | 0.547498   | 5.75793       | 1.21E-05  | 0.000364 |
| Kcnk12_j3        | 0.568253  | 1.55867    | 1.45571       | 8.66E-10  | 7.33E-08 |
| Lhcgr_j1         | 0.46144   | 0.477618   | 0.0497151     | 0.874118  | 0.959954 |
| Nrxn1_j7         | 3.66026   | 4.10518    | 0             | 1         | 1        |
| Nrxn1_j11        | 0.405722  | 2.05877    | 0             | 1         | 1        |
| XLOC_014665      | 5.18E-05  | 0.24717    | 12.2196       | 0.97831   | 0.993756 |
| Cul2_j1          | 9.12929   | 8.77363    | 0             | 1         | 1        |
| Cul2             | 19.72     | 18.7674    | 0             | 1         | 1        |
| Bambi_j1         | 7.01874   | 5.68713    | -0.303511     | 0.0360102 | 0.209396 |
| AK014726         | 0.136906  | 0.0388124  | -1.8186       | 0.245572  | 1        |
| Mtpap            | 0.799214  | 0.812314   | 0.0234562     | 0.920159  | 0.974961 |
| 9430020K01Rik    | 4.06308   | 4.5493     | 0.16307       | 0.134703  | 0.456813 |
| Svil_j2          | 0.34781   | 0.417876   | 0.264777      | 0.366238  | 0.700066 |
| Svil_j7          | 0.369151  | 0          | -1.79769e+308 | 4.34E-17  | 1.12E-14 |
| Svil_j8          | 0.144723  | 0.145752   | 0.0102269     | 0.984486  | 0.995386 |
| Zeb1             | 8.28517   | 6.80606    | 0             | 1         | 1        |
| Zeb1_j3          | 0.678083  | 2.47851    | 0             | 1         | 1        |
| Zeb1_j4          | 0.986988  | 0.59077    | 0             | 1         | 1        |
| Rab18_j2         | 0.582975  | 0.439895   | -0.406274     | 0.457024  | 0.760235 |
| Rab18_j3         | 20.6385   | 22.3473    | 0.114764      | 0.437675  | 0.747822 |
| XLOC_015608      | 0.172325  | 0.178209   | 0             | 1         | 1        |
| Wac              | 5.79806   | 5.09727    | 0             | 1         | 1        |
| Greb1_j3         | 0.141351  | 0          | -1.79769e+308 | 2.89E-08  | 1.83E-06 |
| Snrpd1           | 7.42944   | 7.20238    | -0.0447794    | 0.782989  | 0.926817 |
| Mib1_j1          | 7.90048   | 8.19617    | 0.0530098     | 0.625614  | 0.853954 |
| Mib1             | 0.661293  | 0.150539   | -2.13516      | 3.57E-08  | 2.18E-06 |
| Rbbp8_j2         | 0.0713422 | 0.00181918 | -5.2934       | 0.274912  | 1        |
| Rbbp8_j1         | 0.586379  | 0.440278   | -0.413418     | 0.232157  | 0.579191 |
| XLOC_015615      | 0.107124  | 0.0743015  | -0.527822     | 0.622619  | 1        |
| Cables1          | 1.18865   | 0.89023    | -0.41707      | 0.121196  | 0.433545 |
| Cables1_j3       | 0.281041  | 0.27912    | -0.00989615   | 0.989011  | 0.996607 |
| XLOC_015618      | 0.101851  | 0.0926404  | 0             | 1         | 1        |
| Riok3            | 0.160205  | 0.152553   | 0             | 1         | 1        |
| Riok3_j2         | 6.07037   | 7.12328    | 0             | 1         | 1        |
| 3110002H16Rik_j1 | 0.403069  | 0.45134    | 0.163187      | 0.646727  | 0.863884 |
| 3110002H16Rik_j2 | 3.78488   | 5.35382    | 0.500322      | 0.0060655 | 0.059066 |
| Lama3_j1         | 0.113059  | 0.0574913  | -0.975662     | 0.307817  | 1        |

|                  |           |           |            |           |           |
|------------------|-----------|-----------|------------|-----------|-----------|
| Lama3_j2         | 0.180677  | 0.0864385 | -1.06367   | 0.243458  | 0.590641  |
| Lama3_j6         | 0.269113  | 0.169625  | -0.665861  | 0.055741  | 0.275981  |
| Ttc39c           | 9.77756   | 8.89302   | -0.136802  | 0.184595  | 0.525019  |
| Ttc39c_j3        | 0.221324  | 0.237601  | 0.102386   | 0.900923  | 0.968541  |
| Ttc39c_j4        | 9.06046   | 10.7503   | 0.246715   | 0.227741  | 0.574815  |
| Cabyr_j2         | 1.22243   | 1.0555    | 0          | 1         | 1         |
| Cabyr_j3         | 0.118976  | 0.15847   | 0          | 1         | 1         |
| Impact           | 1.13168   | 1.03865   | -0.123746  | 0.427819  | 0.741888  |
| Impact_j2        | 16.0513   | 16.1365   | 0.00763704 | 0.956736  | 0.987617  |
| XLOC_015626      | 0.200602  | 0.0480579 | -2.06149   | 0.299671  | 0.646333  |
| Taf4b_j1         | 1.36779   | 1.17195   | 0          | 1         | 1         |
| Gm4835           | 2.57225   | 2.42705   | -0.0838235 | 0.906636  | 0.970402  |
| Gm4835_j1        | 6.484     | 6.81838   | 0.072545   | 0.845854  | 0.951315  |
| Dsg1b_j1         | 0.133029  | 0.0691831 | -0.943254  | 0.200527  | 1         |
| Ttr              | 0.307195  | 0.270368  | -0.184228  | 0.663557  | 0.872642  |
| Rnf138           | 0.976488  | 0.317212  | -1.62215   | 0.000338  | 0.0058883 |
| Asxl3_j1         | 0.279269  | 0.0956784 | 0          | 1         | 1         |
| Asxl3_j3         | 0.628325  | 0.273923  | 0          | 1         | 1         |
| Dtna             | 5.96422   | 7.1556    | 0          | 1         | 1         |
| Dtna_j4          | 2.06309   | 2.35336   | 0          | 1         | 1         |
| Dtna_j7          | 2.64032   | 3.75634   | 0          | 1         | 1         |
| Mapre2           | 84.9543   | 73.5975   | 0          | 1         | 1         |
| Zfp397_j3        | 0.155136  | 0.172729  | 0          | 1         | 1         |
| Zfp397_j2        | 1.11972   | 1.00687   | 0          | 1         | 1         |
| Zfp35_j1         | 0.876151  | 0.427476  | -1.03534   | 0.0100293 | 0.0856946 |
| Zfp35            | 7.40779   | 7.72799   | 0.0610494  | 0.606157  | 0.844912  |
| Galnt1           | 11.3876   | 11.6988   | 0.0389035  | 0.712913  | 0.896075  |
| Galnt1_j1        | 0.0309574 | 0.929712  | 4.90843    | 0.0007181 | 0.0109514 |
| 2700062C07Rik_j3 | 0.139363  | 0.091305  | -0.610083  | 0.610683  | 0.846532  |
| Elp2             | 4.25389   | 3.61423   | 0          | 1         | 1         |
| Elp2_j3          | 10.7261   | 11.5254   | 0          | 1         | 1         |
| Mocos_j2         | 0.309876  | 0.189594  | -0.708778  | 0.166965  | 0.503276  |
| Mocos_j1         | 0.0392234 | 0.0579041 | 0.561949   | 0.517785  | 1         |
| Mocos            | 0.181312  | 0.202871  | 0.162084   | 0.708185  | 0.893746  |
| Pik3c3           | 15.7079   | 13.216    | -0.249205  | 0.0150511 | 0.115173  |
| XLOC_015653      | 0.269479  | 9.54E-05  | -11.4645   | 0.953663  | 0.98654   |
| XLOC_015653      | 0.0823601 | 0.0362274 | -1.18487   | 0.45278   | 1         |
| Sap130           | 0.471095  | 0.40076   | 0          | 1         | 1         |
| Sap130_j2        | 3.92259   | 4.02214   | 0          | 1         | 1         |
| Ammecr1l         | 7.19504   | 6.39977   | 0          | 1         | 1         |
| Polr2d           | 7.81705   | 8.97075   | 0.198605   | 0.135932  | 0.458707  |
| Wdr33_j5         | 2.02102   | 1.60993   | -0.328081  | 0.0227704 | 0.154096  |
| Wdr33_j7         | 0.0771823 | 0.0263454 | -1.55072   | 0.334018  | 1         |
| lws1_j3          | 0.817762  | 1.32271   | 0          | 1         | 1         |
| lws1             | 2.02142   | 1.89028   | 0          | 1         | 1         |
| Ercc3            | 12.8629   | 12.6565   | -0.0233371 | 0.829619  | 0.944941  |
| Bin1_j2          | 0.327367  | 0.297801  | 0          | 1         | 1         |

|                  |          |           |            |           |           |
|------------------|----------|-----------|------------|-----------|-----------|
| Wdr36            | 0.356493 | 0.279645  | 0          | 1         | 1         |
| Camk4            | 0.746113 | 1.32682   | 0.830509   | 2.05E-07  | 1.01E-05  |
| AK010403         | 3.76321  | 4.13044   | 0.134331   | 0.603709  | 0.843458  |
| Apc_j2           | 2.72471  | 1.84667   | 0          | 1         | 1         |
| Apc_j11          | 10.9968  | 16.78     | 0          | 1         | 1         |
| Srp19            | 29.8181  | 31.5872   | 0.0831528  | 0.542675  | 0.810409  |
| Fam53c           | 0.280397 | 0.142161  | 0          | 1         | 1         |
| Fam53c           | 13.2275  | 16.2172   | 0          | 1         | 1         |
| Kdm3b            | 2.89765  | 2.85683   | 0          | 1         | 1         |
| Reep2            | 13.6004  | 14.9153   | 0.133143   | 0.391814  | 0.718161  |
| Reep2            | 61.6788  | 66.7938   | 0.114938   | 0.225803  | 0.572932  |
| Egr1             | 2.11441  | 2.70687   | 0.35637    | 0.0441558 | 0.239447  |
| Ctnna1           | 27.784   | 29.2902   | 0          | 1         | 1         |
| Ctnna1_j4        | 1.92128  | 0.8664    | 0          | 1         | 1         |
| Ctnna1_j5        | 17.4878  | 20.053    | 0          | 1         | 1         |
| Matr3            | 34.0131  | 31.7301   | 0          | 1         | 1         |
| Matr3_j1         | 0.82033  | 1.13413   | 0          | 1         | 1         |
| Paip2            | 130.563  | 153.769   | 0.236027   | 0.0063817 | 0.0614449 |
| Ube2d2_j1        | 0.327373 | 0.194092  | -0.754191  | 0.040228  | 0.224622  |
| Ube2d2_j5        | 0.627544 | 1.10618   | 0.817799   | 0.0278227 | 0.176832  |
| Cxhc5_j1         | 1.54081  | 1.17563   | 0          | 1         | 1         |
| Cxhc5_j2         | 7.08321  | 6.86861   | 0          | 1         | 1         |
| Cxhc5_j5         | 3.1954   | 1.8171    | 0          | 1         | 1         |
| 0610010012Rik_j5 | 28.3169  | 30.2269   | 0.0941667  | 0.298576  | 0.645259  |
| Tmco6            | 6.43889  | 6.53459   | 0.0212838  | 0.861389  | 0.956164  |
| Ik_j4            | 7.24654  | 7.45545   | 0          | 1         | 1         |
| Wdr55            | 6.37861  | 6.74129   | 0.0797827  | 0.620588  | 0.851207  |
| Hars2            | 5.69883  | 5.96841   | 0.0666816  | 0.583109  | 0.833121  |
| Zmat2            | 44.2271  | 44.4886   | 0.00850604 | 0.925807  | 0.976962  |
| Pcdha2_j1        | 9.10525  | 7.15209   | 0          | 1         | 1         |
| Pcdha2_j2        | 5.24395  | 3.91442   | 0          | 1         | 1         |
| Pcdha2_j4        | 0.291216 | 0         | 0          | 1         | 1         |
| Pcdhb4           | 1.05269  | 0.85334   | -0.302883  | 0.118879  | 0.428974  |
| Pcdhb5           | 0.758612 | 0.964788  | 0.346849   | 0.0902065 | 0.368765  |
| Pcdhb7           | 1.03456  | 1.2137    | 0.230389   | 0.228333  | 0.575412  |
| Pcdhb9           | 1.56771  | 0.893692  | 0          | 1         | 1         |
| Pcdhb10          | 1.0583   | 0.925311  | 0          | 1         | 1         |
| Pcdhb12          | 0.502392 | 0.447447  | 0          | 1         | 1         |
| Pcdhb13          | 0.865195 | 0.71267   | -0.279792  | 0.185831  | 0.526194  |
| Pcdhb15          | 0.463921 | 0.487176  | 0.0705664  | 0.796231  | 0.932066  |
| Pcdhga3          | 3.91037  | 3.50371   | -0.158422  | 0.301648  | 0.647961  |
| Pcdhgc3          | 14.1782  | 13.2101   | -0.102033  | 0.32455   | 0.667524  |
| Rel2             | 45.9167  | 34.9253   | 0          | 1         | 1         |
| XLOC_015708      | 0.559618 | 0.397249  | -0.4944    | 0.198989  | 0.542173  |
| XLOC_015708      | 0.290097 | 0.244645  | -0.245845  | 0.472986  | 0.769762  |
| XLOC_015709      | 0.315367 | 0.0817849 | -1.94713   | 0.2022    | 0.54575   |
| 0610009020Rik    | 5.67271  | 5.54887   | 0          | 1         | 1         |

|                  |           |           |            |           |           |
|------------------|-----------|-----------|------------|-----------|-----------|
| 0610009O20Rik_j5 | 3.1022    | 4.36857   | 0          | 1         | 1         |
| XLOC_015713      | 0.120058  | 0.120736  | 0.00812982 | 0.991515  | 1         |
| Rnf14            | 86.8515   | 85.3244   | -0.0255936 | 0.765356  | 0.919757  |
| Rnf14_j3         | 7.06346   | 5.47382   | -0.367827  | 0.0468766 | 0.248315  |
| XLOC_015714      | 0.265725  | 0.122643  | -1.11547   | 0.28904   | 0.63673   |
| XLOC_015716      | 0.206034  | 0.047156  | -2.12737   | 0.025459  | 0.16641   |
| XLOC_015716      | 1.23955   | 0.527801  | -1.23175   | 0.0046127 | 0.0477981 |
| Ndfip1_j1        | 40.9716   | 44.4204   | 0          | 1         | 1         |
| Ndfip1           | 289.957   | 250.969   | 0          | 1         | 1         |
| Arhgap26_j1      | 3.8153    | 3.15511   | 0          | 1         | 1         |
| mKIAA1317_j2     | 0.613956  | 0.0906567 | 0          | 1         | 1         |
| mKIAA1317_j4     | 2.77537   | 2.20934   | 0          | 1         | 1         |
| Kctd16           | 1.29007   | 0.79948   | 0          | 1         | 1         |
| Rbm27_j3         | 2.38736   | 2.44139   | 0          | 1         | 1         |
| Rbm27_j2         | 0.165321  | 0.0680149 | 0          | 1         | 1         |
| Pou4f3_j1        | 9.19117   | 6.27634   | -0.550325  | 3.47E-05  | 0.0008741 |
| Pou4f3           | 2.2917    | 1.70252   | -0.428745  | 0.0547567 | 0.273004  |
| Tcerg1           | 0.640198  | 0.137562  | 0          | 1         | 1         |
| Stk32a_j1        | 0.386204  | 0.220863  | 0          | 1         | 1         |
| Stk32a           | 1.7715    | 1.4251    | 0          | 1         | 1         |
| Dcp2             | 0.766163  | 0.733175  | 0          | 1         | 1         |
| Ythdc2           | 1.75454   | 1.22794   | -0.514855  | 0.0038005 | 0.0413654 |
| Ythdc2_j1        | 0.155971  | 0.0332618 | -2.22934   | 0.0175673 | 0.128641  |
| Kcnn2            | 1.2573    | 0.941625  | -0.417101  | 0.0856704 | 0.357343  |
| Kcnn2_j3         | 1.85348   | 2.03923   | 0.137786   | 0.747137  | 0.911904  |
| Eif1a            | 22.8792   | 25.1525   | 0.136666   | 0.137528  | 0.461289  |
| Ap3s1_j2         | 0.230307  | 0.278664  | 0          | 1         | 1         |
| Commd10          | 7.45315   | 8.14251   | 0.127624   | 0.377931  | 0.709571  |
| Commd10_j2       | 0.28718   | 0.784376  | 1.44959    | 0.0200561 | 0.141128  |
| Dmxl1_j13        | 3.62208   | 2.81381   | 0          | 1         | 1         |
| Tnfaip8          | 1.81309   | 1.93359   | 0.0928284  | 0.689868  | 0.885136  |
| Hsd17b4          | 15.0074   | 14.1207   | -0.0878659 | 0.367439  | 0.700969  |
| Cd63-ps          | 87.6126   | 154.262   | 0.816175   | 0         | 0         |
| Prr16            | 0.268774  | 0.457264  | 0.766633   | 0.0582719 | 0.283399  |
| Prr16_j1         | 0.158249  | 0.0435021 | -1.86304   | 0.237632  | 0.584414  |
| Srfbp1           | 2.06111   | 1.8907    | -0.124497  | 0.392232  | 0.718577  |
| Sncaip_j2        | 0.265709  | 0.192427  | -0.465536  | 0.378783  | 0.710354  |
| Snx2_j4          | 0.0520757 | 0.910544  | 4.12805    | 0.0019308 | 0.0242927 |
| Snx24            | 3.42893   | 3.32933   | -0.0425243 | 0.802473  | 0.934285  |
| Csnk1g3_j1       | 0.194752  | 0.149111  | -0.385257  | 0.441439  | 0.750188  |
| Csnk1g3_j3       | 1.09156   | 1.33809   | 0.293778   | 0.331317  | 0.673024  |
| AK036466_j3      | 0.679333  | 0.480405  | -0.499868  | 0.198467  | 0.541655  |
| AK036466_j6      | 0.282351  | 0.13877   | -1.0248    | 0.107941  | 0.408438  |
| XLOC_015755      | 0.112595  | 0.027593  | -2.02877   | 0.326151  | 1         |
| Gramd3           | 0.519016  | 0.839418  | 0.693609   | 0.0174006 | 0.127813  |
| Phax             | 10.9515   | 13.2039   | 0          | 1         | 1         |
| Phax_j1          | 5.76369   | 6.05734   | 0          | 1         | 1         |

|               |           |           |               |           |           |
|---------------|-----------|-----------|---------------|-----------|-----------|
| Lmnb1         | 0.982959  | 1.10193   | 0.164834      | 0.474865  | 0.77086   |
| Prrc1         | 7.91092   | 7.76752   | -0.0263913    | 0.800353  | 0.933449  |
| Ctxn3_j4      | 7.85457   | 5.7845    | 0             | 1         | 1         |
| Ctxn3         | 10.743    | 9.46502   | 0             | 1         | 1         |
| Ctxn3_j6      | 1.65503   | 1.05859   | 0             | 1         | 1         |
| Slc12a2       | 8.00123   | 6.37468   | -0.327868     | 0.0027431 | 0.0321314 |
| Slc12a2_j5    | 1.07137   | 0         | -1.79769e+308 | 1.13E-18  | 3.09E-16  |
| Gm17593_j1    | 0.179921  | 0.174711  | -0.0423914    | 0.935554  | 0.980308  |
| Isoc1         | 11.1676   | 9.56413   | 0             | 1         | 1         |
| A730017C20Rik | 3.9445    | 2.6651    | 0             | 1         | 1         |
| A730017C20Rik | 0.346584  | 0.126868  | 0             | 1         | 1         |
| Chsy3         | 0.0560494 | 0.0302887 | -0.88792      | 0.477194  | 1         |
| ligp1         | 0.586349  | 0.431185  | 0             | 1         | 1         |
| ligp1_j2      | 0.281489  | 0.309458  | 0             | 1         | 1         |
| Dctn4         | 36.9925   | 39.2588   | 0             | 1         | 1         |
| Rbm22         | 7.3041    | 7.83396   | 0.101035      | 0.434305  | 0.74545   |
| Rps14_j5      | 0.304016  | 0.426442  | 0             | 1         | 1         |
| Cd74          | 7.67333   | 10.6472   | 0.472553      | 0.0028713 | 0.0332496 |
| Cd74          | 31.9685   | 63.3116   | 0.985817      | 0         | 0         |
| Camk2a_j1     | 23.5845   | 18.4049   | 0             | 1         | 1         |
| Camk2a_j4     | 15.0037   | 15.521    | 0             | 1         | 1         |
| Pdgfrb        | 1.60192   | 1.03807   | 0             | 1         | 1         |
| Pdgfrb        | 2.87677   | 2.93775   | 0             | 1         | 1         |
| Pdgfrb_j3     | 2.49554   | 2.9935    | 0             | 1         | 1         |
| Csf1r_j1      | 0.218105  | 0.0744018 | 0             | 1         | 1         |
| AK032118      | 0.272182  | 0.193604  | -0.491467     | 0.209413  | 0.55378   |
| Csnk1a1       | 2.33843   | 2.10091   | 0             | 1         | 1         |
| Csnk1a1_j4    | 0.0851552 | 0.0248486 | 0             | 1         | 1         |
| AK143260_j2   | 0.177694  | 0         | -1.79769e+308 | 0.0111241 | 0.092746  |
| 1500015A07Rik | 0.415122  | 0.206457  | 0             | 1         | 1         |
| Sh3tc2        | 0.712517  | 0.511954  | -0.476911     | 0.0835102 | 0.352296  |
| Htr4_j1       | 1.76251   | 0.946092  | -0.897576     | 7.90E-08  | 4.38E-06  |
| Htr4_j6       | 1.33297   | 0.986038  | -0.434925     | 0.0410333 | 0.227643  |
| Spink10       | 0.348902  | 0.639086  | 0             | 1         | 1         |
| Spink10_j1    | 0.202988  | 0.488347  | 0             | 1         | 1         |
| Apccd1        | 2.27731   | 2.51338   | 0.142298      | 0.426092  | 0.740906  |
| Napg          | 48.8605   | 43.0777   | -0.181727     | 0.0353559 | 0.207174  |
| Wdr7          | 0.773704  | 0.324111  | -1.25529      | 0.0001766 | 0.0034651 |
| St8sia3_j3    | 0.0744219 | 0         | -1.79769e+308 | 2.31E-05  | 1         |
| St8sia3_j4    | 12.3258   | 9.74612   | -0.338778     | 0.0002131 | 0.0040424 |
| Onecut2       | 2.31025   | 1.78242   | 0             | 1         | 1         |
| XLOC_015798   | 1.27892   | 3.8173    | 1.57763       | 1.05E-05  | 0.0003234 |
| Nedd4l_j5     | 3.56398   | 2.35586   | 0             | 1         | 1         |
| Nedd4l_j12    | 0.531964  | 0.20608   | 0             | 1         | 1         |
| Malt1_j3      | 0.269328  | 0.173786  | -0.632056     | 0.0772276 | 0.336332  |
| mKIAA1629_j3  | 1.09965   | 0.772029  | 0             | 1         | 1         |
| Sec11c        | 40.8629   | 39.8067   | -0.0377827    | 0.713673  | 0.896209  |

|               |           |                 |            |           |           |
|---------------|-----------|-----------------|------------|-----------|-----------|
| Grp           | 0.332598  | 1.64526         | 2.30646    | 8.05E-08  | 4.45E-06  |
| Pmaip1_j1     | 0.464238  | 0.673347        | 0.536486   | 0.166603  | 0.502929  |
| Pmaip1        | 0.734381  | 1.42713         | 0.958518   | 0.0001383 | 0.0028061 |
| Gnal_j3       | 1.63819   | 0.108064        | 0          | 1         | 1         |
| Impa2         | 1.4733    | 0.737364        | -0.998599  | 1.25E-06  | 5.02E-05  |
| Cidea         | 2.58478   | 1.85731         | -0.476828  | 0.0264061 | 0.170746  |
| Tubb6         | 1.11477   | 2.72087         | 0          | 1         | 1         |
| Slmo1_j1      | 0.654946  | 0.149531        | -2.13093   | 0.0021873 | 0.0267806 |
| Slmo1         | 0.629114  | 0.536823        | -0.228875  | 0.570616  | 0.826452  |
| Slmo1_j4      | 0.485655  | 0 -1.79769e+308 |            | 1.42E-07  | 7.33E-06  |
| Psmg2         | 4.04066   | 3.73035         | -0.115282  | 0.589236  | 0.836005  |
| Seh1l         | 0.0615683 | 0.0314333       | -0.969893  | 0.447304  | 1         |
| Cep192_j1     | 0.108563  | 0.0559458       | -0.95643   | 0.130938  | 1         |
| Cep192_j7     | 0.0490345 | 0.0165324       | -1.5685    | 0.243349  | 1         |
| D18Ert653e_j1 | 0.190149  | 0.160319        | 0          | 1         | 1         |
| D18Ert653e_j3 | 0.669379  | 0.410792        | 0          | 1         | 1         |
| Rnmt          | 6.36308   | 5.51569         | 0          | 1         | 1         |
| Tcf4_j1       | 1.48026   | 0.715743        | 0          | 1         | 1         |
| Tcf4          | 0.847477  | 1.16643         | 0          | 1         | 1         |
| Tcf4          | 1.3504    | 1.40916         | 0          | 1         | 1         |
| Ccdc68_j3     | 8.3454    | 7.11079         | 0          | 1         | 1         |
| Ccdc68        | 5.71791   | 5.31838         | 0          | 1         | 1         |
| Mbd2          | 16.3924   | 16.7174         | 0.0283215  | 0.794171  | 0.931387  |
| Mbd2_j3       | 10.8683   | 10.6928         | -0.0234818 | 0.828275  | 0.944579  |
| Mex3c_j1      | 1.10237   | 0.462942        | -1.25171   | 0.0005475 | 0.0088019 |
| Mro_j12       | 0.0568257 | 0 -1.79769e+308 |            | 0.0517567 | 1         |
| AK036329_j2   | 0.0694609 | 0.0673737       | -0.0440149 | 0.9714    | 1         |
| AK036329_j1   | 0.0860693 | 0.01445         | -2.57443   | 0.210576  | 1         |
| Cxxc1_j1      | 1.08486   | 1.63831         | 0          | 1         | 1         |
| Mbd1_j8       | 0.398178  | 0.25672         | 0          | 1         | 1         |
| Mbd1_j6       | 2.03308   | 1.87656         | 0          | 1         | 1         |
| Mbd1_j9       | 0.946565  | 0.337508        | 0          | 1         | 1         |
| Acaa2         | 23.8913   | 23.5477         | -0.0208988 | 0.838945  | 0.948659  |
| BC031181      | 75.0367   | 78.3752         | 0          | 1         | 1         |
| Dym_j3        | 8.18175   | 7.62457         | 0          | 1         | 1         |
| Dym_j2        | 3.90987   | 3.86841         | 0          | 1         | 1         |
| Smad7         | 1.79815   | 1.44666         | -0.313789  | 0.0960031 | 0.382589  |
| Zbtb7c        | 0         | 0.489384        | 0          | 1         | 1         |
| Smad2         | 5.50556   | 5.74247         | 0.0607828  | 0.543379  | 0.8108    |
| Smad2_j2      | 1.34746   | 0 -1.79769e+308 |            | 2.01E-12  | 2.72E-10  |
| Skor2_j3      | 0.910872  | 0.905308        | 0          | 1         | 1         |
| Skor2         | 2.12647   | 1.48466         | 0          | 1         | 1         |
| Ier3ip1       | 31.1007   | 30.5877         | -0.0239934 | 0.816558  | 0.940275  |
| Hdhd2         | 11.4679   | 10.1733         | -0.172811  | 0.0749318 | 0.33029   |
| Pias2         | 2.03159   | 1.16695         | -0.799864  | 0.0094145 | 0.0819653 |
| Pias2         | 4.4006    | 4.01504         | -0.132286  | 0.300852  | 0.647316  |
| St8sia5_j3    | 0.0651022 | 0 -1.79769e+308 |            | 0.0033258 | 1         |



|                  |             |                 |           |           |           |
|------------------|-------------|-----------------|-----------|-----------|-----------|
| St8sia5_j2       | 0.0780924   | 7.48E-05        | -10.0271  | 0.887304  | 1         |
| St8sia5_j1       | 0.000240499 | 0.114001        | 8.88881   | 0.650798  | 1         |
| Atp5a1           | 185.877     | 172.362         | 0         | 1         | 1         |
| Atp5a1_j2        | 119.061     | 73.2928         | 0         | 1         | 1         |
| Pstpip2_j1       | 0.74366     | 0.457504        | -0.700859 | 0.209948  | 0.554471  |
| Pstpip2          | 11.6741     | 9.13627         | -0.353635 | 0.0024326 | 0.0292038 |
| 5430411K18Rik_j1 | 0.0669254   | 0.0402965       | 0         | 1         | 1         |
| 5430411K18Rik    | 0.694998    | 0.531516        | 0         | 1         | 1         |
| 5430411K18Rik_j4 | 0.101231    | 0               | 0         | 1         | 1         |
| Pard6g           | 2.71881     | 2.90891         | 0.0975011 | 0.523295  | 0.799177  |
| Txn14a           | 66.6538     | 66.5848         | 0         | 1         | 1         |
| XLOC_015853      | 0.242366    | 0.154826        | -0.646541 | 0.100103  | 0.391665  |
| Zfp516           | 0.783995    | 0.671527        | 0         | 1         | 1         |
| Zfp516_j4        | 0.07049     | 0               | 0         | 1         | 1         |
| XLOC_015858      | 0.309783    | 0.230704        | -0.42522  | 0.601473  | 0.842291  |
| Zadh2            | 10.1069     | 9.74432         | 0         | 1         | 1         |
| Zadh2_j1         | 0.534144    | 1.06864         | 0         | 1         | 1         |
| Cyb5             | 54.1406     | 68.808          | 0.345865  | 0.0003428 | 0.0059536 |
| Neto1            | 1.2567      | 2.33269         | 0         | 1         | 1         |
| Cbln2            | 0.988034    | 1.08401         | 0         | 1         | 1         |
| Rttn_j1          | 0.149933    | 0 -1.79769e+308 |           | 2.97E-06  | 0.0001077 |
| Rttn_j2          | 1.38E-05    | 0.110617        | 12.9653   | 0.979528  | 1         |
| Rttn_j9          | 0.0905477   | 0.00133804      | -6.08049  | 0.415737  | 1         |
| Rttn_j8          | 0.0928591   | 0.0857134       | -0.115523 | 0.893711  | 1         |
| Rttn_j15         | 0.405522    | 0.199799        | -1.02123  | 0.24878   | 0.59633   |
| Tmx3             | 28.1294     | 24.2777         | 0         | 1         | 1         |
| Tmx3_j1          | 0.559078    | 0.168994        | 0         | 1         | 1         |
| Crem_j3          | 1.27968     | 1.77415         | 0         | 1         | 1         |
| Crem_j5          | 0.288105    | 0.353444        | 0         | 1         | 1         |
| Map3k8_j5        | 0.079366    | 0 -1.79769e+308 |           | 0.0200383 | 1         |
| Map3k8_j3        | 0.0870283   | 0 -1.79769e+308 |           | 0.0206154 | 1         |
| cot              | 0.0570523   | 0.0336838       | -0.760232 | 0.615149  | 1         |
| Zfp438_j4        | 0.0979618   | 3.53E-05        | -11.4366  | 0.955576  | 1         |
| Zfp438           | 0.472155    | 0.47919         | 0.0213371 | 0.951308  | 0.985905  |
| Zfp438_j5        | 0.399805    | 0.222208        | -0.847385 | 0.0894453 | 0.366698  |
| Gm10125_j1       | 0.196057    | 0.214133        | 0.127232  | 0.814193  | 0.939438  |
| Gm10125_j5       | 0.481394    | 0.258072        | -0.899446 | 0.263323  | 0.612223  |
| Arhgap12_j5      | 4.91357     | 6.09003         | 0         | 1         | 1         |
| Arhgap12_j6      | 0.468523    | 0.249661        | 0         | 1         | 1         |
| Arhgap12         | 4.59405     | 4.22715         | 0         | 1         | 1         |
| Arhgap12         | 1.02861     | 0.598955        | 0         | 1         | 1         |
| Kif5b_j4         | 51.7105     | 45.7507         | 0         | 1         | 1         |
| Kif5b_j5         | 3.3985      | 1.02456         | 0         | 1         | 1         |
| Epc1_j1          | 2.28561     | 3.00496         | 0         | 1         | 1         |
| Epc1             | 2.05631     | 2.22626         | 0         | 1         | 1         |
| Epc1             | 1.3239      | 1.09826         | 0         | 1         | 1         |
| Mkx_j1           | 1.52413     | 1.09187         | -0.481185 | 0.0812024 | 0.346945  |

|                  |           |            |            |           |           |
|------------------|-----------|------------|------------|-----------|-----------|
| Mkx              | 0.526958  | 0.332694   | -0.66349   | 0.0311878 | 0.190492  |
| Mpp7_j4          | 0.171152  | 9.23E-05   | -10.8572   | 0.834125  | 0.946622  |
| Mpp7_j2          | 4.02E-05  | 0.0780488  | 10.9216    | 0.912483  | 1         |
| Mpp7_j3          | 1.37699   | 1.48314    | 0.107141   | 0.556827  | 0.819299  |
| Ccny             | 9.94127   | 10.3825    | 0.0626582  | 0.515296  | 0.794119  |
| Rock1_j3         | 1.71255   | 1.74008    | 0          | 1         | 1         |
| Rock1            | 0.849781  | 0.635722   | 0          | 1         | 1         |
| Abhd3            | 11.2406   | 9.15774    | -0.295659  | 0.0133597 | 0.106021  |
| BC030050         | 0.36878   | 0.186283   | -0.985267  | 0.0249575 | 0.164057  |
| 6030446N2ORik    | 1.45653   | 1.4298     | -0.0267191 | 0.880687  | 0.962006  |
| 6030446N2ORik_j2 | 0.282409  | 0.180244   | -0.647841  | 0.184831  | 0.525128  |
| Npc1             | 8.53438   | 7.96787    | -0.0990914 | 0.344872  | 0.684393  |
| Ankrd29_j2       | 3.35693   | 2.38175    | 0          | 1         | 1         |
| Ankrd29_j3       | 0.472344  | 0.306319   | 0          | 1         | 1         |
| Ankrd29          | 5.01927   | 3.5793     | 0          | 1         | 1         |
| Osbp1a           | 3.06289   | 0.861187   | 0          | 1         | 1         |
| Zfp521_j6        | 3.6436    | 3.09292    | 0          | 1         | 1         |
| Zfp521_j4        | 1.00203   | 0.828327   | 0          | 1         | 1         |
| Ss18_j5          | 0.139573  | 0.00192688 | 0          | 1         | 1         |
| Ss18_j4          | 0.217793  | 0.0140478  | 0          | 1         | 1         |
| Ss18_j6          | 0.128621  | 0.182847   | 0          | 1         | 1         |
| Kctd1            | 2.91674   | 2.94221    | 0.0125481  | 0.939382  | 0.981541  |
| Kctd1_j1         | 0.673804  | 0.718237   | 0.09213    | 0.791685  | 0.930476  |
| Aqp4             | 0.21356   | 0.419632   | 0          | 1         | 1         |
| Aqp4             | 1.12676   | 0.381593   | 0          | 1         | 1         |
| Chst9_j2         | 0.166448  | 0.129592   | -0.361102  | 0.584102  | 0.833298  |
| Chst9_j1         | 0.424985  | 0.257329   | -0.723798  | 0.0818681 | 0.348597  |
| Cdh2_j3          | 10.8328   | 13.7399    | 0.342969   | 0.0012817 | 0.0174408 |
| Cdh2             | 7.35869   | 6.51391    | -0.175924  | 0.135964  | 0.458734  |
| B4galt6_j1       | 3.23104   | 1.52802    | 0          | 1         | 1         |
| Trappc8_j7       | 0.386802  | 0          | 0          | 1         | 1         |
| Trappc8_j3       | 4.94041   | 4.32308    | 0          | 1         | 1         |
| Trappc8_j2       | 3.25524   | 1.60206    | 0          | 1         | 1         |
| Fam59a_j3        | 1.22045   | 1.40375    | 0          | 1         | 1         |
| Fam59a_j2        | 0.996553  | 0.757434   | 0          | 1         | 1         |
| Fam59a           | 1.79295   | 1.16806    | 0          | 1         | 1         |
| Nol4_j5          | 0.415551  | 0.0821251  | -2.33913   | 0.001822  | 0.0232172 |
| Nol4             | 0.152651  | 0.0351184  | -2.11993   | 0.0149211 | 0.114486  |
| XLOC_015910      | 0.166918  | 0.0319396  | 0          | 1         | 1         |
| Zfp397os_j3      | 0.0888696 | 0.12337    | 0          | 1         | 1         |
| Zfp191_j1        | 2.99516   | 2.01935    | 0          | 1         | 1         |
| Zfp191           | 1.55033   | 1.87155    | 0          | 1         | 1         |
| Zfp191           | 3.71242   | 3.8705     | 0          | 1         | 1         |
| Ino80c           | 7.58102   | 6.68024    | -0.182493  | 0.172178  | 0.509416  |
| Rprd1a           | 5.91887   | 4.25478    | 0          | 1         | 1         |
| Rprd1a_j2        | 5.11348   | 3.6357     | 0          | 1         | 1         |
| Slc39a6          | 22.0184   | 25.4938    | 0.211436   | 0.0202884 | 0.142297  |

|                  |           |                       |            |           |           |
|------------------|-----------|-----------------------|------------|-----------|-----------|
| 5730494M16Rik    | 9.11651   | 7.53366               | -0.275131  | 0.0039537 | 0.0425339 |
| Celf4_j11        | 4.21164   | 5.39459               | 0          | 1         | 1         |
| Celf4_j12        | 2.64063   | 3.09242               | 0          | 1         | 1         |
| Celf4            | 0.65834   | 0.118868              | 0          | 1         | 1         |
| XLOC_015919      | 8.73912   | 7.83674               | 0          | 1         | 1         |
| Rit2             | 41.6805   | 31.8697               | -0.387185  | 5.55E-05  | 0.0013034 |
| Syt4_j3          | 49.6544   | 60.4621               | 0          | 1         | 1         |
| Slc25a46_j3      | 8.28929   | 10.941                | 0          | 1         | 1         |
| Slc25a46         | 13.768    | 12.2735               | 0          | 1         | 1         |
| Gypc             | 2.87835   | 3.07949               | 0.0974486  | 0.553294  | 0.817135  |
| Stard4           | 15.3902   | 13.9695               | -0.139727  | 0.13691   | 0.460113  |
| DOH4S114         | 4.38364   | 6.14061               | 0          | 1         | 1         |
| DOH4S114         | 5.25972   | 3.63324               | 0          | 1         | 1         |
| Epb4.1l4a_j5     | 0.359573  | 0.498112              | 0          | 1         | 1         |
| Epb4.1l4a        | 1.49402   | 2.94278               | 0          | 1         | 1         |
| Reep5            | 648.055   | 579.884               | -0.160352  | 0.11331   | 0.418962  |
| Fam13b_j4        | 4.70438   | 3.18831               | 0          | 1         | 1         |
| Fam13b_j3        | 1.65978   | 1.34713               | 0          | 1         | 1         |
| Fam13b           | 2.54285   | 0.542855              | 0          | 1         | 1         |
| Fam13b_j5        | 0.199244  | 0.0850523             | 0          | 1         | 1         |
| Nme5             | 0.592228  | 0.315796              | -0.907157  | 0.192328  | 0.534585  |
| Nme5_j1          | 0.66998   | 0.730563              | 0.124891   | 0.833087  | 0.946305  |
| Brd8             | 0.0778259 | 0.00850073            | -3.19459   | 0.0602315 | 1         |
| Brd8_j2          | 0.245272  | 0 -1.79769e+308       |            | 1.71E-06  | 6.60E-05  |
| Cdc23            | 9.35137   | 10.8945               | 0.220346   | 0.0410343 | 0.227643  |
| Gfra3_j3         | 4.88166   | 6.71251               | 0          | 1         | 1         |
| Gfra3            | 6.65205   | 10.4707               | 0          | 1         | 1         |
| Etf1             | 23.8832   | 25.1723               | 0.0758439  | 0.405482  | 0.727199  |
| Hspa9_j1         | 41.1992   | 39.6253               | 0          | 1         | 1         |
| Hspa9            | 13.0266   | 11.9281               | 0          | 1         | 1         |
| XLOC_015948      | 0.147138  | 0.0702907             | -1.06576   | 0.312656  | 0.657209  |
| Lrrtm2           | 5.13057   | 4.23635               | 0          | 1         | 1         |
| Sil1             | 6.50813   | 6.2002                | 0          | 1         | 1         |
| Spata24          | 0.637191  | 0.625917              | -0.0257553 | 0.888359  | 0.964658  |
| Spata24          | 2.0938    | 1.89128               | -0.14676   | 0.64244   | 0.862006  |
| Dnajc18          | 14.8452   | 11.4994               | 0          | 1         | 1         |
| Ecscr_j5         | 0         | 0.118078 1.79769e+308 |            | 0.091423  | 1         |
| Ecscr_j4         | 0.946744  | 0.931522              | -0.0233848 | 1         | 1         |
| Tmem173          | 3.32435   | 4.63476               | 0.47942    | 0.0017714 | 0.0226731 |
| Nrg2_j1          | 0.154155  | 0 -1.79769e+308       |            | 0.0055349 | 0.0548302 |
| Nrg2_j2          | 0.774115  | 0.304398              | -1.34659   | 0.005141  | 0.0517901 |
| Hbegf            | 3.10727   | 3.18587               | 0.0360391  | 0.823698  | 0.943114  |
| Apbb3_j3         | 0.0539426 | 0 -1.79769e+308       |            | 0.0003862 | 1         |
| E230025N22Rik_j1 | 0.253342  | 0.126211              | -1.00524   | 0.0808383 | 0.346133  |
| Ndufa2           | 38.8527   | 40.9778               | 0.0768274  | 0.457369  | 0.760373  |
| Hars_j6          | 66.353    | 74.1245               | 0.15979    | 0.0708821 | 0.320021  |
| Hars_j7          | 0.262235  | 7.49835               | 4.83764    | 0         | 0         |

|             |           |                 |            |           |           |
|-------------|-----------|-----------------|------------|-----------|-----------|
| Taf7        | 8.5055    | 7.02125         | -0.276667  | 0.0462555 | 0.246499  |
| Diap1_j9    | 0.0840625 | 0.051037        | -0.719918  | 0.514128  | 1         |
| Diap1_j11   | 1.50001   | 1.51402         | 0.0134112  | 0.950696  | 0.985774  |
| Hdac3       | 24.0547   | 23.8472         | 0          | 1         | 1         |
| Fchsd1      | 3.8028    | 3.19762         | 0          | 1         | 1         |
| Arap3_j8    | 0.112105  | 0 -1.79769e+308 |            | 2.96E-05  | 1         |
| XLOC_015973 | 0.0998485 | 0.0147791       | -2.75619   | 0.175124  | 1         |
| XLOC_015975 | 0.178236  | 0.126372        | -0.496115  | 0.44982   | 0.755765  |
| Pcdh1_j2    | 4.37401   | 6.91537         | 0.660848   | 1.89E-06  | 7.22E-05  |
| Pcdh1_j4    | 5.14826   | 4.83301         | -0.0911645 | 0.44203   | 0.750413  |
| Pcdh1_j5    | 2.83398   | 1.91834         | -0.56297   | 0.0003397 | 0.0059119 |
| Pcdh1_j3    | 8.34475   | 8.28527         | -0.0103192 | 0.919584  | 0.974745  |
| Pcdh12      | 0.269761  | 0.149586        | -0.850708  | 0.0086346 | 0.0768784 |
| XLOC_015982 | 0.141909  | 0.140464        | 0          | 1         | 1         |
| Spry4_j1    | 0.988749  | 0.143709        | 0          | 1         | 1         |
| Spry4       | 1.98236   | 1.19111         | 0          | 1         | 1         |
| Fgf1_j5     | 13.0402   | 7.55546         | 0          | 1         | 1         |
| Fgf1_j7     | 8.84609   | 7.45917         | 0          | 1         | 1         |
| Nr3c1_j2    | 0.339102  | 0.000122328     | 0          | 1         | 1         |
| Yipf5       | 7.17839   | 7.45996         | 0.0555081  | 0.632855  | 0.857313  |
| Prelid2_j2  | 0.207781  | 0.144727        | -0.521726  | 0.474205  | 0.770585  |
| Prelid2     | 0.0193651 | 0.0907611       | 2.22861    | 0.268321  | 1         |
| Grxcr2      | 2.80547   | 4.49224         | 0.679194   | 1.64E-05  | 0.0004718 |
| Lars        | 14.1013   | 13.8595         | 0          | 1         | 1         |
| XLOC_015994 | 0.16344   | 0.379257        | 1.21442    | 0.147745  | 0.476406  |
| XLOC_015994 | 0.133984  | 0.28352         | 1.08139    | 0.143466  | 0.470591  |
| Ppp2r2b_j5  | 8.73096   | 15.9413         | 0          | 1         | 1         |
| Ppp2r2b_j6  | 1.12543   | 0.29515         | 0          | 1         | 1         |
| Ppp2r2b_j7  | 31.1041   | 31.9252         | 0          | 1         | 1         |
| Dpysl3      | 15.7479   | 13.7241         | 0          | 1         | 1         |
| Dpysl3      | 7.56951   | 8.66611         | 0          | 1         | 1         |
| Jakmip2     | 3.03779   | 3.05845         | 0          | 1         | 1         |
| Jakmip2_j6  | 2.73903   | 2.43486         | 0          | 1         | 1         |
| Mcc_j2      | 0.391335  | 0.272333        | 0          | 1         | 1         |
| Mcc_j5      | 0.363677  | 0.177411        | -1.03557   | 0.0640255 | 0.300273  |
| Trim36_j7   | 9.43638   | 1.80678         | 0          | 1         | 1         |
| Trim36_j9   | 22.8724   | 17.8026         | 0          | 1         | 1         |
| Trim36_j10  | 6.81265   | 3.53069         | 0          | 1         | 1         |
| Pggt1b      | 1.10609   | 0.863395        | 0          | 1         | 1         |
| Ccdc112     | 1.94008   | 2.5533          | 0.396247   | 0.0185136 | 0.133632  |
| Fem1c       | 3.74144   | 3.84464         | 0          | 1         | 1         |
| Tmed7       | 18.3742   | 16.149          | -0.186232  | 0.0640464 | 0.30029   |
| Cdo1        | 5.22302   | 4.42876         | -0.237982  | 0.109246  | 0.41123   |
| Atg12       | 16.0416   | 15.8141         | 0          | 1         | 1         |
| Sema6a_j6   | 0.0789061 | 0               | 0          | 1         | 1         |
| Sema6a_j5   | 0.53081   | 0               | 0          | 1         | 1         |
| Sema6a      | 1.05695   | 2.25569         | 0          | 1         | 1         |

|                  |           |           |               |           |           |
|------------------|-----------|-----------|---------------|-----------|-----------|
| Dtwd2_j1         | 0.171033  | 0         | -1.79769e+308 | 0.0030592 | 0.0349938 |
| Dtwd2            | 0.674003  | 0.569038  | -0.244229     | 0.494631  | 0.782586  |
| Dtwd2            | 0.0896833 | 0.0984167 | 0.134064      | 0.88394   | 1         |
| Ppic             | 2.01836   | 2.31053   | 0.195038      | 0.389489  | 0.716664  |
| Cep120           | 19.7595   | 20.0267   | 0.0193823     | 0.831506  | 0.945742  |
| Zfp608_j4        | 0.065869  | 0         | -1.79769e+308 | 0.0025659 | 1         |
| Zfp608           | 0.579737  | 0.411505  | -0.494489     | 0.0911814 | 0.371149  |
| Zfp608_j3        | 0.19548   | 0.451601  | 1.20803       | 0.0005546 | 0.0088961 |
| Aldh7a1          | 6.05398   | 5.85456   | 0             | 1         | 1         |
| March3_j2        | 2.11872   | 1.64233   | -0.367444     | 0.0938435 | 0.377427  |
| C330018D20Rik    | 0.33828   | 0         | -1.79769e+308 | 7.15E-08  | 4.04E-06  |
| C330018D20Rik    | 0.936053  | 1.14135   | 0.286074      | 0.254207  | 0.602522  |
| Fbn2_j4          | 0.10258   | 0.0196599 | -2.38342      | 0.116982  | 1         |
| 2010002N04Rik    | 2.40651   | 6.9611    | 0             | 1         | 1         |
| 2010002N04Rik_j2 | 4.50929   | 12.8733   | 0             | 1         | 1         |
| Synpo            | 2.7183    | 2.86438   | 0             | 1         | 1         |
| Synpo_j5         | 0.0662216 | 0         | 0             | 1         | 1         |
| Synpo            | 1.36403   | 0.906378  | 0             | 1         | 1         |
| Ndst1_j5         | 5.41976   | 6.97754   | 0             | 1         | 1         |
| Ndst1_j6         | 2.53201   | 4.4477    | 0             | 1         | 1         |
| Ndst1_j4         | 3.78296   | 2.03308   | 0             | 1         | 1         |
| Tcof1            | 2.81876   | 3.29852   | 0.226756      | 0.112502  | 0.417337  |
| Slc6a7           | 0.80941   | 0.331722  | -1.28689      | 0.0003615 | 0.0062152 |
| Hmgxb3           | 3.56816   | 3.90774   | 0             | 1         | 1         |
| Slc26a2_j1       | 0.0609027 | 1.02E-05  | -12.5379      | 0.964705  | 1         |
| Slc26a2          | 0.492406  | 0.525344  | 0.0934146     | 0.636527  | 0.859104  |
| Ppargc1b         | 0.845588  | 0.738431  | 0             | 1         | 1         |
| Arhgef37_j9      | 0.0763514 | 0         | -1.79769e+308 | 0.0004824 | 1         |
| Arhgef37_j8      | 0.267869  | 0         | -1.79769e+308 | 2.56E-11  | 2.89E-09  |
| Pcyox1l          | 9.29083   | 8.1868    | 0             | 1         | 1         |
| Grpel2_j2        | 1.39106   | 1.4779    | 0             | 1         | 1         |
| Grpel2           | 0.252856  | 0.793411  | 0             | 1         | 1         |
| Afap1l1          | 1.51006   | 1.57486   | 0.0606153     | 0.751002  | 0.913682  |
| Ablim3_j5        | 1.13754   | 0.963066  | 0             | 1         | 1         |
| Ablim3           | 3.58276   | 3.56674   | 0             | 1         | 1         |
| Ablim3_j4        | 4.50117   | 4.62151   | 0             | 1         | 1         |
| Adrb2            | 0.353881  | 0.532238  | 0.588805      | 0.069339  | 0.315719  |
| Fbxo38_j1        | 1.98029   | 2.08482   | 0             | 1         | 1         |
| Fbxo38           | 3.17798   | 2.35192   | 0             | 1         | 1         |
| 2700046A07Rik_j1 | 0.351066  | 0.222344  | -0.658951     | 0.298342  | 0.644925  |
| Fam38b_j3        | 14.9981   | 16.5446   | 0             | 1         | 1         |
| Fam38b_j4        | 23.667    | 21.9742   | 0             | 1         | 1         |
| Fam38b_j5        | 0.122412  | 0.0209007 | 0             | 1         | 1         |
| Fam38b_j6        | 0.0641365 | 0         | 0             | 1         | 1         |
| Txnl1_j1         | 23.0966   | 21.253    | -0.120014     | 0.20324   | 0.547195  |
| Txnl1_j2         | 53.9539   | 54.8519   | 0.0238143     | 0.81003   | 0.937853  |
| BC048666_j1      | 0.138881  | 0.0755093 | -0.879122     | 0.203295  | 0.547229  |

|                  |           |                        |            |           |           |
|------------------|-----------|------------------------|------------|-----------|-----------|
| Fech_j3          | 6.22451   | 5.66455                | 0          | 1         | 1         |
| Fech             | 16.5029   | 16.0136                | 0          | 1         | 1         |
| Nars_j2          | 20.0111   | 31.4524                | 0          | 1         | 1         |
| Nars             | 37.883    | 32.158                 | 0          | 1         | 1         |
| Lman1            | 4.98983   | 6.10226                | 0.290352   | 0.0248499 | 0.163552  |
| Lman1            | 0.995665  | 0.562316               | -0.824279  | 0.0055703 | 0.0551252 |
| Afg3l2           | 3.30992   | 0                      | 0          | 1         | 1         |
| Afg3l2_j4        | 3.44802   | 0                      | 0          | 1         | 1         |
| Spire1_j1        | 7.3099    | 6.37728                | 0          | 1         | 1         |
| Cep76            | 0.316389  | 0.312101               | -0.0196841 | 0.957832  | 0.987996  |
| Ptpn2_j1         | 1.99622   | 1.86043                | -0.101636  | 0.721052  | 0.90017   |
| Ptpn2            | 0.43319   | 0.53556                | 0.306049   | 0.384695  | 0.713387  |
| Ptpn2_j4         | 0.466362  | 0.575899               | 0.304366   | 0.645691  | 0.863371  |
| 4933403F05Rik    | 1.85276   | 1.59019                | 0          | 1         | 1         |
| Rab27b           | 8.28511   | 6.1699                 | -0.425273  | 4.80E-05  | 0.0011524 |
| Rab27b           | 1.94      | 1.32004                | -0.555476  | 0.0032224 | 0.0365006 |
| 4930503L19Rik_j4 | 0.338898  | 0.59941                | 0          | 1         | 1         |
| 4930503L19Rik    | 1.16584   | 0.913273               | 0          | 1         | 1         |
| Poli_j3          | 0.37214   | 0 -1.79769e+308        |            | 1.34E-06  | 5.33E-05  |
| Poli             | 1.1267    | 1.21391                | 0.107567   | 0.667279  | 0.874166  |
| Poli             | 0.40963   | 0.241623               | -0.761562  | 0.181019  | 0.520897  |
| Smad4            | 7.07641   | 6.12182                | 0          | 1         | 1         |
| Elac1_j2         | 0.48818   | 0.772824               | 0          | 1         | 1         |
| Elac1_j3         | 1.16985   | 0.34111                | 0          | 1         | 1         |
| Elac1            | 3.45458   | 3.29009                | 0          | 1         | 1         |
| Me2              | 0         | 0.0797195 1.79769e+308 |            | 0.0017577 | 1         |
| Mapk4_j2         | 0.672401  | 0.697067               | 0          | 1         | 1         |
| Mapk4_j3         | 0.892676  | 0.000187729            | 0          | 1         | 1         |
| Mapk4            | 2.39907   | 2.77912                | 0          | 1         | 1         |
| XLOC_016067      | 0.113974  | 0.127682               | 0.16384    | 0.859698  | 1         |
| RP24-263P17.1_j4 | 0.239619  | 0 -1.79769e+308        |            | 0.0001031 | 0.0022135 |
| RP24-263P17.1_j3 | 0.154689  | 0.0446159              | -1.79374   | 0.0718994 | 0.322435  |
| RP24-263P17.1_j1 | 0.291979  | 0.397001               | 0.443281   | 0.29667   | 0.643426  |
| Gm672_j1         | 25.5802   | 23.6822                | 0          | 1         | 1         |
| Gm672_j7         | 3.41632   | 1.88914                | 0          | 1         | 1         |
| Gm672_j8         | 1.21706   | 0                      | 0          | 1         | 1         |
| Gm672_j11        | 4.86341   | 2.66639                | 0          | 1         | 1         |
| XLOC_016078      | 0.133084  | 0.10155                | -0.390148  | 0.703537  | 1         |
| XLOC_016078      | 0.153005  | 0.00911598             | -4.06904   | 0.252317  | 0.600308  |
| XLOC_016078      | 0.0532974 | 0 -1.79769e+308        |            | 0.068158  | 1         |
| XLOC_016078      | 0.17313   | 0.0834432              | -1.05299   | 0.153864  | 0.4867    |
| Katnal2_j1       | 0.0512858 | 0.000235203            | -7.76851   | 0.885695  | 1         |
| Katnal2_j2       | 0.195623  | 0.0972442              | -1.00839   | 0.256175  | 0.605009  |
| Katnal2_j11      | 0.0947086 | 0.0769511              | -0.299554  | 0.811284  | 1         |
| Rnf165           | 0.338154  | 0.381452               | 0.173821   | 0.535782  | 0.80631   |
| 8030462N17Rik_j1 | 1.36514   | 1.08734                | 0          | 1         | 1         |
| 8030462N17Rik_j3 | 0.449104  | 0.286463               | 0          | 1         | 1         |

|                  |           |                 |            |           |           |
|------------------|-----------|-----------------|------------|-----------|-----------|
| 8030462N17Rik_j2 | 1.58071   | 1.39823         | 0          | 1         | 1         |
| A330094K24Rik_j1 | 0.385705  | 0.313514        | -0.298966  | 0.516816  | 0.795273  |
| A330094K24Rik_j3 | 0.073023  | 0 -1.79769e+308 | 0.0262777  |           | 1         |
| A330094K24Rik_j4 | 0.0777023 | 0 -1.79769e+308 | 0.0236512  |           | 1         |
| A330094K24Rik    | 0.291103  | 0.176272        | -0.723728  | 0.251113  | 0.598977  |
| Slc14a1          | 0.185453  | 0.0414274       | -2.1624    | 0.0364295 | 0.211083  |
| Adnp2_j1         | 3.99998   | 4.41364         | 0.141976   | 0.258357  | 0.607047  |
| Adnp2            | 0.506587  | 0.523815        | 0.0482479  | 0.870709  | 0.958769  |
| Rbfa             | 11.1834   | 10.1543         | 0          | 1         | 1         |
| Hsbp1l1          | 4.44365   | 3.78772         | 0          | 1         | 1         |
| Kcng2_j3         | 0.0681172 | 0               | 0          | 1         | 1         |
| Kcng2_j4         | 0.16291   | 0.067422        | 0          | 1         | 1         |
| Ctdp1            | 1.16562   | 1.12268         | -0.0541452 | 0.799694  | 0.933125  |
| Nfatc1_j5        | 0.138629  | 0.0171036       | -3.01886   | 0.0739259 | 0.327783  |
| Nfatc1           | 0.232949  | 0.209141        | -0.155537  | 0.741108  | 0.909246  |
| Atp9b_j9         | 0.107844  | 0.025155        | 0          | 1         | 1         |
| Atp9b            | 6.26472   | 5.21883         | 0          | 1         | 1         |
| Galr1            | 0.377341  | 0.257023        | -0.55397   | 0.0588327 | 0.285203  |
| Zfp236_j4        | 0.545704  | 0.304683        | 0          | 1         | 1         |
| Tshz1            | 3.59414   | 2.97541         | 0          | 1         | 1         |
| Zfp407_j1        | 0.159455  | 0 -1.79769e+308 | 0.0008191  | 0.012198  |           |
| Cndp1_j2         | 0.219326  | 0.0343735       | -2.67371   | 0.201195  | 0.544548  |
| Cndp2            | 44.4667   | 55.5904         | 0.32211    | 0.0003109 | 0.0055008 |
| 1700034H14Rik    | 0.933976  | 1.1383          | 0.285422   | 0.277613  | 0.626491  |
| 1700034H14Rik_j2 | 0.166597  | 0.113213        | -0.557315  | 0.492519  | 0.781115  |
| Socs6_j1         | 0.112384  | 0 -1.79769e+308 | 4.24E-05   |           | 1         |
| Socs6            | 0.324979  | 0.0539069       | -2.59181   | 0.0004104 | 0.0069104 |
| Socs6            | 0.481391  | 0.132276        | -1.86366   | 0.0001099 | 0.0023303 |
| Dok6             | 0.440912  | 0.548385        | 0          | 1         | 1         |
| Cul2_j2          | 6.21107   | 9.19603         | 0          | 1         | 1         |
| AK014726_j2      | 0.201999  | 0.181732        | -0.152541  | 0.860562  | 0.955855  |
| Mtpap            | 6.9341    | 6.86993         | -0.0134136 | 0.918577  | 0.974658  |
| XLOC_015605      | 11.7895   | 10.2219         | -0.20584   | 0.353904  | 0.690091  |
| Wac              | 2.91543   | 3.36903         | 0          | 1         | 1         |
| Wac_j1           | 0.201662  | 0.195615        | 0          | 1         | 1         |
| Thoc1            | 0.65383   | 0.660347        | 0          | 1         | 1         |
| Greb1l_j5        | 0.22816   | 0.0591759       | -1.94696   | 0.0238348 | 0.15895   |
| Greb1l_j6        | 0.281758  | 0.34718         | 0.30123    | 0.477138  | 0.772607  |
| Snrpd1_j1        | 4.90567   | 6.5945          | 0.426813   | 0.10572   | 0.403811  |
| Rbbp8_j3         | 0.644068  | 0.681811        | 0.0821598  | 0.801052  | 0.933726  |
| Rbbp8            | 0.2624    | 0.21347         | -0.297734  | 0.477016  | 0.772559  |
| Rbbp8_j6         | 0.5247    | 1.27464         | 1.28052    | 0.0105718 | 0.089065  |
| 3110002H16Rik    | 12.8977   | 14.4754         | 0.166485   | 0.112845  | 0.418103  |
| Impact_j1        | 4.68959   | 4.24971         | -0.142098  | 0.56143   | 0.821781  |
| Taf4b_j2         | 0.96138   | 0.974606        | 0          | 1         | 1         |
| Rnf138_j2        | 0.0103334 | 0.256892        | 4.63578    | 0.0159483 | 0.120124  |
| Dtna_j2          | 2.20734   | 2.33591         | 0          | 1         | 1         |

|                  |           |                 |              |           |           |
|------------------|-----------|-----------------|--------------|-----------|-----------|
| Dtna_j5          | 0         | 0.536288        | 0            | 1         | 1         |
| Mapre2_j1        | 28.3264   | 25.9518         | 0            | 1         | 1         |
| Zfp397           | 0.16325   | 0.102523        | 0            | 1         | 1         |
| Zfp397_j1        | 0.199413  | 0.300892        | 0            | 1         | 1         |
| Elp2_j1          | 20.542    | 18.4772         | 0            | 1         | 1         |
| Elp2_j2          | 0.408086  | 0               | 0            | 1         | 1         |
| Mocos_j4         | 2.11557   | 1.81844         | -0.218351    | 0.272717  | 0.621573  |
| Fhod3            | 1.41971   | 1.05133         | -0.433384    | 0.0053491 | 0.0533806 |
| Fhod3_j1         | 2.47218   | 2.63826         | 0.093801     | 0.616448  | 0.848845  |
| AW554918_j1      | 0.447213  | 0.0828818       | -2.43184     | 1.99E-05  | 0.0005525 |
| AW554918         | 0.409889  | 0.614281        | 0.583665     | 0.02654   | 0.171271  |
| Sap130_j3        | 0.0825889 | 0.138712        | 0            | 1         | 1         |
| Ammecr1_j4       | 4.76271   | 5.65283         | 0            | 1         | 1         |
| Wdr33_j3         | 0.480132  | 0 -1.79769e+308 |              | 2.66E-22  | 7.90E-20  |
| Wdr33_j4         | 0.228503  | 0.183062        | -0.319886    | 0.349273  | 0.687028  |
| Bin1_j5          | 0.780419  | 1.14535         | 0            | 1         | 1         |
| Bin1_j4          | 1.34182   | 2.19835         | 0            | 1         | 1         |
| Bin1_j3          | 0.276978  | 0.40804         | 0            | 1         | 1         |
| Camk4_j5         | 1.1868    | 1.68236         | 0.503406     | 0.0266202 | 0.171653  |
| Kdm3b_j1         | 0         | 0.0717433       | 0            | 1         | 1         |
| Ctnna1_j3        | 8.29803   | 12.9759         | 0            | 1         | 1         |
| Matr3_j2         | 24.191    | 20.7224         | 0            | 1         | 1         |
| Ube2d2_j4        | 54.8779   | 57.7084         | 0.0725561    | 0.413167  | 0.732017  |
| Cxxc5_j3         | 0.0228864 | 1.09303         | 0            | 1         | 1         |
| 0610010012Rik_j6 | 8.83397   | 12.3268         | 0.480661     | 0.0787469 | 0.340364  |
| Slc4a9_j2        | 0.0418629 | 0.117405        | 1.48775      | 0.442142  | 1         |
| Ankhd1_j4        | 0.0988805 | 0.173124        | 0.808047     | 0.0708946 | 0.320021  |
| Tmco6_j1         | 0.0604751 | 0 -1.79769e+308 |              | 0.0567353 | 1         |
| Ik_j1            | 0.131036  | 0.174944        | 0            | 1         | 1         |
| Pcdhac2          | 18.5864   | 15.8737         | 0            | 1         | 1         |
| XLOC_015708      | 0.0415796 | 0.0941688       | 1.17937      | 0.425404  | 1         |
| 0610009020Rik_j7 | 0.733851  | 1.09371         | 0            | 1         | 1         |
| 9630014M24Rik_j5 | 1.48184   | 0.834076        | 0            | 1         | 1         |
| 9630014M24Rik_j4 | 0.921763  | 1.18102         | 0            | 1         | 1         |
| Arhgap26_j3      | 0.542689  | 0.287881        | 0            | 1         | 1         |
| Gm5820_j1        | 0.161238  | 0.0742032       | 0            | 1         | 1         |
| mKIAA1317_j1     | 0.100152  | 0.128028        | 0            | 1         | 1         |
| Rbm27_j4         | 0.198923  | 0.206184        | 0            | 1         | 1         |
| Tcerg1_j3        | 3.90494   | 4.35215         | 0            | 1         | 1         |
| Dcp2_j1          | 4.88274   | 4.06007         | 0            | 1         | 1         |
| A930012L18Rik_j1 | 0.463136  | 0.557453        | 0            | 1         | 1         |
| A930012L18Rik_j2 | 0.241038  | 0.243103        | 0            | 1         | 1         |
| Ythdc2_j5        | 0.0526989 | 0.113863        | 1.11146      | 0.235432  | 1         |
| Ap3s1_j5         | 0.254771  | 0.244395        | 0            | 1         | 1         |
| Tnfaip8          | 0         | 0.751939        | 1.79769e+308 | 6.63E-06  | 0.0002172 |
| Csnk1g3_j5       | 0.0341913 | 0.655197        | 4.26023      | 0.0590703 | 0.28563   |
| Csnk1g3_j4       | 2.14055   | 1.6645          | -0.36289     | 0.455397  | 0.75921   |



|                  |           |           |               |           |           |
|------------------|-----------|-----------|---------------|-----------|-----------|
| AK036466_j5      | 0.167641  | 0.19296   | 0.202931      | 0.706991  | 0.893169  |
| AK163160_j1      | 0.260959  | 0.332583  | 0.349893      | 0.447892  | 0.754594  |
| XLOC_015756      | 0.042567  | 0.0930743 | 1.12865       | 0.414931  | 1         |
| XLOC_015756      | 0         | 0.0911447 | 1.79769e+308  | 0.0409905 | 1         |
| Isoc1_j1         | 0.573291  | 0.193452  | 0             | 1         | 1         |
| Rbm22_j1         | 3.0586    | 3.6577    | 0.258066      | 0.316782  | 0.66013   |
| Rps14_j1         | 2.98128   | 3.43706   | 0             | 1         | 1         |
| Rps14_j4         | 5.02125   | 6.99923   | 0             | 1         | 1         |
| Camk2a_j3        | 0.211589  | 0.328041  | 0             | 1         | 1         |
| Csnk1a1_j3       | 0.192122  | 0.0668435 | 0             | 1         | 1         |
| Il17b            | 0.20683   | 0.268407  | 0.375975      | 0.607419  | 0.845325  |
| Htr4_j7          | 0.295556  | 0.170321  | -0.795179     | 0.167081  | 0.503381  |
| Htr4_j8          | 0.103199  | 0.16755   | 0.699168      | 0.324941  | 0.668094  |
| Spink10          | 0.342598  | 0.410081  | 0             | 1         | 1         |
| Spink10_j3       | 0.0509505 | 0.14666   | 0             | 1         | 1         |
| Wdr7             | 28.0478   | 24.466    | -0.197108     | 0.0225443 | 0.153174  |
| St8sia3_j5       | 21.7303   | 21.0439   | -0.0463068    | 0.743736  | 0.910328  |
| Nedd4l_j2        | 6.18575   | 0.557103  | 0             | 1         | 1         |
| Nedd4l_j4        | 0.975077  | 0.733575  | 0             | 1         | 1         |
| mKIAA1629_j6     | 0.286297  | 0.122031  | 0             | 1         | 1         |
| mKIAA1629_j9     | 1.30196   | 1.44771   | 0             | 1         | 1         |
| Grp_j1           | 0.098737  | 0.248951  | 1.3342        | 0.228072  | 0.575101  |
| Gnal_j1          | 1.0521    | 0.907974  | 0             | 1         | 1         |
| Gnal             | 3.48539   | 2.14814   | 0             | 1         | 1         |
| Seh1l_j1         | 1.6074    | 1.29251   | -0.314555     | 0.20135   | 0.54481   |
| Seh1l_j3         | 0.358603  | 0         | -1.79769e+308 | 1.02E-06  | 4.20E-05  |
| Cep192_j11       | 0.666916  | 0.719256  | 0.109         | 0.718983  | 0.898918  |
| Rnmt_j2          | 0.742586  | 0.741333  | 0             | 1         | 1         |
| Tcf4             | 0.20417   | 1.03604   | 0             | 1         | 1         |
| Ccdc68_j1        | 0.256188  | 0.286056  | 0             | 1         | 1         |
| Mex3c            | 13.5881   | 14.2494   | 0.0685616     | 0.494008  | 0.782369  |
| XLOC_015825      | 0.07291   | 0.0299214 | -1.28494      | 0.673078  | 1         |
| XLOC_015825      | 0.0352472 | 0.0904467 | 1.35956       | 0.588651  | 1         |
| Mro_j7           | 0.191788  | 0.229963  | 0.261887      | 0.630404  | 0.856283  |
| Cxxc1            | 4.14387   | 3.88888   | 0             | 1         | 1         |
| Mbd1_j2          | 1.88998   | 2.75006   | 0             | 1         | 1         |
| Mbd1             | 1.2492    | 0.91787   | 0             | 1         | 1         |
| Myo5b_j8         | 0.0887203 | 0.0443843 | -0.999214     | 0.404567  | 1         |
| Acaa2_j2         | 0.798809  | 0.837867  | 0.0688704     | 0.917484  | 0.974311  |
| BC031181         | 22.3657   | 22.5808   | 0             | 1         | 1         |
| Dym              | 42.4315   | 37.5369   | 0             | 1         | 1         |
| Smad2_j1         | 4.36269   | 2.16087   | -1.0136       | 0.0002157 | 0.0040815 |
| Skor2_j2         | 0.547077  | 0.452936  | 0             | 1         | 1         |
| St8sia5          | 0.603095  | 0.223669  | -1.43102      | 0.0018977 | 0.0239499 |
| St8sia5          | 0.147403  | 0.0690918 | -1.09318      | 0.202112  | 0.545602  |
| Atp5a1_j4        | 26.2018   | 57.4647   | 0             | 1         | 1         |
| 5430411K18Rik_j3 | 2.4347    | 2.7368    | 0             | 1         | 1         |

|               |           |                      |            |           |           |
|---------------|-----------|----------------------|------------|-----------|-----------|
| Pqlc1         | 47.727    | 49.9545              | 0          | 1         | 1         |
| XLOC_015853   | 0.18597   | 0.128768             | -0.530295  | 0.560259  | 0.821025  |
| Mbp_j1        | 13.25     | 12.146               | 0          | 1         | 1         |
| Mbp_j3        | 16.4786   | 19.033               | 0          | 1         | 1         |
| Mbp_j2        | 7.996     | 7.68012              | 0          | 1         | 1         |
| Zfp516_j3     | 0.0537864 | 0                    | 0          | 1         | 1         |
| XLOC_015858   | 0.12652   | 0.165641             | 0.388699   | 0.78887   | 0.92953   |
| Cbln2_j2      | 1.03418   | 2.90985              | 0          | 1         | 1         |
| Cbln2_j1      | 1.41907   | 1.64217              | 0          | 1         | 1         |
| Cbln2_j3      | 9.67972   | 16.4065              | 0          | 1         | 1         |
| Crem_j1       | 1.01851   | 1.69906              | 0          | 1         | 1         |
| Crem          | 0.342675  | 0.659899             | 0          | 1         | 1         |
| Crem_j2       | 0.607748  | 0.627287             | 0          | 1         | 1         |
| Zfp438_j6     | 0.298203  | 0.0370183            | -3.00998   | 0.096605  | 0.383933  |
| Gm10125_j4    | 0.855521  | 0.446591             | -0.937848  | 0.0099731 | 0.0854548 |
| Gm10125       | 1.78589   | 1.48694              | -0.264296  | 0.410456  | 0.730298  |
| Arhgap12_j4   | 1.01888   | 1.36502              | 0          | 1         | 1         |
| Kif5b_j1      | 1.39988   | 1.44376              | 0          | 1         | 1         |
| Kif5b         | 7.13493   | 4.45077              | 0          | 1         | 1         |
| Usp14         | 19.76     | 16.5889              | 0          | 1         | 1         |
| Rock1_j4      | 0.722252  | 0.854329             | 0          | 1         | 1         |
| Osbpl1a       | 5.74596   | 4.03959              | 0          | 1         | 1         |
| Zfp521        | 1.74173   | 1.43684              | 0          | 1         | 1         |
| Zfp521_j1     | 0.0214202 | 0.319371             | 0          | 1         | 1         |
| Ss18_j2       | 0.74535   | 0.219196             | 0          | 1         | 1         |
| Kctd1_j4      | 0.0962802 | 0 -1.79769e+308      | 0.0269804  |           | 1         |
| Aqp4_j1       | 0.071348  | 0.112225             | 0          | 1         | 1         |
| B4galt6       | 2.48376   | 3.81473              | 0          | 1         | 1         |
| Trappc8_j6    | 10.5595   | 8.69697              | 0          | 1         | 1         |
| Fam59a_j1     | 0.0010637 | 0.22199              | 0          | 1         | 1         |
| Celf4_j4      | 0.974734  | 0.33791              | 0          | 1         | 1         |
| Syt4_j1       | 1.03109   | 2.9601               | 0          | 1         | 1         |
| Syt4          | 2.02443   | 0.742589             | 0          | 1         | 1         |
| Stard4_j2     | 0.692526  | 0.907483             | 0.390003   | 0.151206  | 0.482207  |
| Stard4_j1     | 1.36918   | 1.15778              | -0.241946  | 0.28807   | 0.636106  |
| Epb4.1l4a_j6  | 0         | 0.0577405            | 0          | 1         | 1         |
| Fam13b_j1     | 9.808     | 8.50897              | 0          | 1         | 1         |
| Fam13b_j2     | 9.71334   | 9.92506              | 0          | 1         | 1         |
| Nme5_j2       | 0.35583   | 0.250807             | -0.504613  | 0.590534  | 0.836658  |
| 4933408B17Rik | 0.193298  | 0.336034             | 0.797779   | 0.230333  | 0.577332  |
| Sil1_j1       | 2.86393   | 2.48037              | 0          | 1         | 1         |
| Eccscr_j2     | 0.244464  | 0 -1.79769e+308      | 0.0071488  | 0.0669529 |           |
| Eccscr_j3     | 0.944709  | 1.16657              | 0.304326   | 0.429979  | 0.743005  |
| Nrg2_j6       | 0.816255  | 0.807211             | -0.0160736 | 0.968258  | 0.991026  |
| Nrg2_j5       | 0         | 0.21717 1.79769e+308 | 0.0206491  | 0.144032  |           |
| Nrg2_j4       | 0.475914  | 0.658142             | 0.467698   | 0.20966   | 0.55399   |
| Pfdn1         | 2.57519   | 2.4643               | -0.0634967 | 0.613831  | 0.847685  |

|               |           |           |               |           |           |
|---------------|-----------|-----------|---------------|-----------|-----------|
| Apbb3_j2      | 7.92814   | 6.41919   | -0.304591     | 0.0401833 | 0.2245    |
| Apbb3_j5      | 21.8479   | 18.1236   | -0.269624     | 0.0129083 | 0.103541  |
| Hars_j2       | 0.030152  | 0.165562  | 2.45705       | 0.0012526 | 0.0171162 |
| Diap1_j3      | 2.09248   | 2.00022   | -0.0650559    | 0.80201   | 0.934238  |
| Arap3_j2      | 0.0953895 | 0.305261  | 1.67814       | 0.0017273 | 0.0222194 |
| Pcdh1_j4      | 2.54591   | 1.85578   | -0.456158     | 0.0224797 | 0.152884  |
| Gnpda1_j2     | 3.99305   | 4.83917   | 0.277268      | 0.0444317 | 0.240435  |
| Spry4_j2      | 4.1331    | 2.8675    | 0             | 1         | 1         |
| Fgf1_j8       | 0.862841  | 0.433773  | 0             | 1         | 1         |
| Fgf1_j2       | 38.335    | 19.3174   | 0             | 1         | 1         |
| Nr3c1_j3      | 1.39281   | 2.20871   | 0             | 1         | 1         |
| Prelid2_j7    | 0.346752  | 0.309499  | -0.163969     | 0.833745  | 0.946434  |
| Lars_j1       | 4.48457   | 7.92575   | 0             | 1         | 1         |
| Ppp2r2b_j1    | 30.726    | 33.4548   | 0             | 1         | 1         |
| Ppp2r2b       | 2.25682   | 1.82549   | 0             | 1         | 1         |
| Ppp2r2b_j2    | 43.7732   | 43.0105   | 0             | 1         | 1         |
| Jakmip2_j3    | 9.38988   | 11.7367   | 0             | 1         | 1         |
| Mcc_j7        | 0         | 0.11025   | 1.79769e+308  | 0.0920624 | 1         |
| Trim36_j4     | 0.427671  | 0.339478  | 0             | 1         | 1         |
| Trim36_j5     | 4.72417   | 4.54009   | 0             | 1         | 1         |
| Trim36        | 6.67127   | 5.25149   | 0             | 1         | 1         |
| Ccdc112_j1    | 0.34725   | 6.84E-05  | -12.3099      | 0.963891  | 0.989793  |
| Atg12_j1      | 20.5957   | 23.6496   | 0             | 1         | 1         |
| Aldh7a1_j1    | 3.80382   | 5.77153   | 0             | 1         | 1         |
| March3_j1     | 0.0556612 | 0.186048  | 1.74093       | 0.130978  | 0.450516  |
| Synpo_j1      | 0.158213  | 0.434055  | 0             | 1         | 1         |
| Arhgef37_j1   | 0.0138784 | 0.0798779 | 2.52496       | 0.0632367 | 1         |
| Arhgef37_j2   | 0.166772  | 0         | -1.79769e+308 | 3.31E-07  | 1.55E-05  |
| Ablim3        | 0.850232  | 0.670418  | 0             | 1         | 1         |
| Fbxo38_j2     | 1.43004   | 0.999651  | 0             | 1         | 1         |
| Fam38b_j8     | 1.36705   | 0.851568  | 0             | 1         | 1         |
| Fam38b_j7     | 4.87655   | 3.20163   | 0             | 1         | 1         |
| Txn1          | 1.46075   | 1.40105   | -0.0602054    | 0.783081  | 0.926858  |
| Fech_j2       | 1.34245   | 1.02011   | 0             | 1         | 1         |
| Fech_j1       | 1.60147   | 1.19702   | 0             | 1         | 1         |
| Fech_j4       | 0         | 0.119746  | 0             | 1         | 1         |
| Nars_j1       | 34.3356   | 35.4634   | 0             | 1         | 1         |
| Nars          | 57.8017   | 56.5826   | 0             | 1         | 1         |
| Alpk2_j1      | 0.0316155 | 0.127733  | 2.01443       | 0.35127   | 1         |
| Spire1_j2     | 0.0491542 | 0.0114738 | 0             | 1         | 1         |
| 4930503L19Rik | 0.892484  | 1.0179    | 0             | 1         | 1         |
| Poli_j1       | 0         | 0.0536025 | 1.79769e+308  | 0.104014  | 1         |
| Poli_j4       | 0.3149    | 0.151684  | -1.05382      | 0.133327  | 0.454276  |
| Poli_j2       | 0.0702447 | 0         | -1.79769e+308 | 0.0157774 | 1         |
| Ska1_j1       | 0.0809498 | 0.0905883 | 0.162298      | 0.867596  | 1         |
| Gm672_j2      | 0.448656  | 0         | 0             | 1         | 1         |
| XLOC_016077   | 0.0933485 | 0.135496  | 0.537548      | 0.534272  | 1         |

|                  |           |           |               |           |           |
|------------------|-----------|-----------|---------------|-----------|-----------|
| XLOC_016078      | 0.0704143 | 0.0655552 | -0.103157     | 0.936861  | 1         |
| A330094K24Rik_j5 | 0.32311   | 0.104116  | -1.63384      | 0.0398859 | 0.223402  |
| Slc14a1_j2       | 0.123591  | 0.210486  | 0.76815       | 0.311939  | 0.656418  |
| Rbfa_j1          | 2.84902   | 3.25547   | 0             | 1         | 1         |
| Rbfa_j2          | 2.10713   | 4.24324   | 0             | 1         | 1         |
| Nfatc1           | 0.308022  | 0.295113  | -0.0617681    | 0.872762  | 0.959737  |
| Atp9b_j1         | 0.92724   | 1.264     | 0             | 1         | 1         |
| Atp9b_j2         | 3.91145   | 4.10687   | 0             | 1         | 1         |
| Atp9b_j3         | 6.09178   | 5.04594   | 0             | 1         | 1         |
| Zfp236_j2        | 0         | 0.364454  | 0             | 1         | 1         |
| Zfp236           | 0.861578  | 0.246101  | 0             | 1         | 1         |
| Tshz1_j1         | 0.552631  | 1.70842   | 0             | 1         | 1         |
| Cndp1_j1         | 0         | 0.0825162 | 1.79769e+308  | 0.154589  | 1         |
| 1700034H14Rik_j3 | 0.651401  | 0.444444  | -0.551545     | 0.184064  | 0.524679  |
| Cis4_j2          | 0.0774212 | 0.0878169 | 0.181771      | 0.796994  | 1         |
| Bambi            | 0.649527  | 0.543151  | -0.258036     | 0.528989  | 0.802307  |
| Svil_j3          | 0.40392   | 0.339406  | -0.251057     | 0.41381   | 0.732563  |
| Svil_j9          | 0.189473  | 0.304258  | 0.683303      | 0.0875182 | 0.362018  |
| Rab18_j1         | 19.3625   | 18.6161   | -0.0567147    | 0.528061  | 0.801943  |
| Colec12_j1       | 0.197526  | 0         | -1.79769e+308 | 6.02E-06  | 0.0001992 |
| Greb11_j1        | 0.373533  | 0.365269  | -0.032278     | 0.913999  | 0.973025  |
| Greb11           | 0.293015  | 0.295728  | 0.0132945     | 0.964494  | 0.989999  |
| Rbbp8            | 0.0443774 | 0.127062  | 1.51763       | 0.0755858 | 1         |
| Rbbp8_j5         | 0.0472569 | 0         | -1.79769e+308 | 0.0167769 | 1         |
| XLOC_015615      | 0.137091  | 0.0993559 | -0.464453     | 0.654036  | 1         |
| Cables1_j1       | 0.455919  | 0.354814  | -0.361715     | 1         | 1         |
| Riok3_j5         | 14.1671   | 19.4197   | 0             | 1         | 1         |
| Lama3_j5         | 0.0529044 | 0.0161176 | -1.71475      | 0.454297  | 1         |
| Lama3_j4         | 0.0836135 | 0.028685  | -1.54344      | 0.410464  | 1         |
| Ttc39c_j2        | 0.111152  | 0         | -1.79769e+308 | 0.0074639 | 1         |
| Cabyr_j4         | 1.86731   | 1.18958   | 0             | 1         | 1         |
| Dtna_j8          | 4.39195   | 1.47863   | 0             | 1         | 1         |
| Dtna_j9          | 0.356214  | 0.280341  | 0             | 1         | 1         |
| Zfp35_j3         | 0         | 0.210139  | 1.79769e+308  | 0.0029479 | 0.0339995 |
| Galnt1_j2        | 2.48765   | 2.17699   | -0.192448     | 0.334195  | 0.674996  |
| Gm7701           | 18.193    | 16.1201   | -0.174529     | 0.123647  | 0.437974  |
| Mocos_j5         | 1.27622   | 1.31576   | 0.0440163     | 0.913297  | 0.972756  |
| Fhod3            | 0.232862  | 0.561574  | 1.27          | 4.78E-07  | 2.16E-05  |
| AW554918_j2      | 0.161353  | 0.0463488 | -1.79961      | 0.0282665 | 0.178512  |
| Sap130           | 0.427547  | 0.347979  | 0             | 1         | 1         |
| Sap130_j1        | 3.95926   | 3.86475   | 0             | 1         | 1         |
| Ammecr1_j3       | 0.124397  | 0.0286157 | 0             | 1         | 1         |
| Wdr33            | 5.89937   | 5.22832   | -0.174213     | 0.222998  | 0.570022  |
| Map3k2           | 0.629744  | 0.468926  | 0             | 1         | 1         |
| Ercc3_j1         | 8.89958   | 10.8631   | 0.287626      | 0.130102  | 0.449122  |
| Bin1             | 32.2498   | 29.1543   | 0             | 1         | 1         |
| Bin1_j8          | 54.3027   | 66.2201   | 0             | 1         | 1         |

|                  |           |                 |             |           |           |
|------------------|-----------|-----------------|-------------|-----------|-----------|
| Wdr36            | 6.09107   | 6.89967         | 0           | 1         | 1         |
| Camk4_j3         | 0.164462  | 0.0984266       | -0.74063    | 0.075863  | 0.332799  |
| Camk4_j8         | 0.601643  | 0.778385        | 0.371575    | 0.331899  | 0.673345  |
| Apc_j6           | 0.834808  | 0.000421851     | 0           | 1         | 1         |
| Apc_j5           | 1.35251   | 1.73323         | 0           | 1         | 1         |
| Pkd2l2_j2        | 0.155768  | 0.126088        | -0.304968   | 0.686917  | 0.88349   |
| Pkd2l2_j1        | 0.115528  | 0.0302433       | -1.93356    | 0.216504  | 1         |
| Pkd2l2_j6        | 0.0886153 | 0.155326        | 0.809675    | 0.336015  | 1         |
| Fam53c_j1        | 4.71502   | 7.46869         | 0           | 1         | 1         |
| Cxzc5_j4         | 1.04375   | 1.12288         | 0           | 1         | 1         |
| Psd2_j3          | 0.233842  | 0.056527        | -2.04852    | 0.0350009 | 0.205638  |
| Pura_j1          | 3.75208   | 0.00560802      | 0           | 1         | 1         |
| Pura             | 4.55667   | 3.09932         | 0           | 1         | 1         |
| O610010012Rik    | 4.24411   | 5.01248         | 0.240061    | 0.377405  | 0.70922   |
| Slc4a9_j1        | 0.236593  | 0.077505        | -1.61005    | 0.102396  | 0.396457  |
| XLOC_015684      | 0.767999  | 0.485677        | -0.661106   | 0.192989  | 0.535375  |
| Ik_j5            | 10.9386   | 10.7315         | 0           | 1         | 1         |
| XLOC_015709      | 0.0887413 | 0.0223385       | -1.99007    | 0.279278  | 1         |
| XLOC_015709      | 0.283441  | 0.370268        | 0.385524    | 0.253721  | 0.601839  |
| O610009O20Rik_j4 | 0.83332   | 0.65638         | 0           | 1         | 1         |
| O610009O20Rik_j6 | 4.7608    | 4.23408         | 0           | 1         | 1         |
| Rnf14_j1         | 1.31335   | 0.949285        | -0.468343   | 0.1951    | 0.537411  |
| 9630014M24Rik_j2 | 1.83021   | 1.63393         | 0           | 1         | 1         |
| 9630014M24Rik_j1 | 0.0958597 | 0.0414025       | 0           | 1         | 1         |
| Arhgap26_j2      | 0.905316  | 0.0534608       | 0           | 1         | 1         |
| XLOC_015728      | 1.01805   | 0.638288        | 0           | 1         | 1         |
| XLOC_015728      | 0.586966  | 0.351894        | 0           | 1         | 1         |
| XLOC_015728      | 0.167417  | 0               | 0           | 1         | 1         |
| Tcerg1           | 2.58351   | 2.54476         | 0           | 1         | 1         |
| Tcerg1_j1        | 2.31028   | 2.31817         | 0           | 1         | 1         |
| Tcerg1_j2        | 0.476509  | 0.7782          | 0           | 1         | 1         |
| Ythdc2_j6        | 3.04686   | 2.70665         | -0.170814   | 0.289342  | 0.636857  |
| Kcnn2            | 1.32274   | 0.884019        | -0.581378   | 0.024777  | 0.163245  |
| Kcnn2_j4         | 3.58487   | 3.34596         | -0.0995007  | 0.718611  | 0.89873   |
| Eif1a_j1         | 0.215298  | 0 -1.79769e+308 |             | 2.65E-05  | 0.0006973 |
| Ap3s1_j4         | 0.196545  | 0.105224        | 0           | 1         | 1         |
| Dmxl1_j2         | 0.119111  | 0.009677        | 0           | 1         | 1         |
| Tnfaip8_j3       | 0.256032  | 0 -1.79769e+308 |             | 0.0004677 | 0.0076978 |
| Csnk1g3_j2       | 0.353778  | 0.30736         | -0.202917   | 0.79366   | 0.931169  |
| Csnk1g3_j6       | 5.65998   | 4.3482          | -0.380379   | 0.0163636 | 0.12241   |
| Csnk1g3_j8       | 10.6662   | 10.6692         | 0.000407128 | 0.997235  | 0.999203  |
| XLOC_015754      | 0.252825  | 0.127447        | -0.988237   | 0.0900154 | 0.368275  |
| XLOC_015755      | 0.231467  | 0.123592        | -0.90522    | 0.491938  | 0.780786  |
| AK163160_j2      | 0.109867  | 0.203272        | 0.887657    | 0.490012  | 0.779734  |
| Megf10_j1        | 3.5502    | 3.19194         | -0.153463   | 0.249404  | 0.596861  |
| Ctxn3_j3         | 27.4106   | 18.4263         | 0           | 1         | 1         |
| Ctxn3_j9         | 15.1377   | 12.6656         | 0           | 1         | 1         |

|                  |           |                 |            |           |           |
|------------------|-----------|-----------------|------------|-----------|-----------|
| Slc12a2_j1       | 0.172965  | 0.193768        | 0.163849   | 0.720022  | 0.899505  |
| A730017C20Rik_j3 | 0.682734  | 0.442429        | 0          | 1         | 1         |
| Chsy3_j1         | 0.224047  | 0.0664347       | -1.75379   | 0.0197278 | 0.139584  |
| Gm4951_j1        | 0.434162  | 0.000732922     | -9.21036   | 0.36691   | 0.700429  |
| ligp1_j1         | 0.176807  | 6.85E-05        | 0          | 1         | 1         |
| BC023105         | 0.335925  | 0.168174        | -0.998183  | 0.0173954 | 0.127795  |
| Rps14_j2         | 9.78793   | 5.99561         | 0          | 1         | 1         |
| Pdgfrb_j1        | 0.113255  | 0.137221        | 0          | 1         | 1         |
| Csf1r_j4         | 1.28395   | 5.04277         | 0          | 1         | 1         |
| XLOC_015783      | 0.221352  | 0.033089        | -2.74192   | 0.102356  | 0.396414  |
| Csnk1a1_j2       | 6.96231   | 7.01531         | 0          | 1         | 1         |
| AK143260_j3      | 2.75174   | 2.5206          | -0.12658   | 0.664742  | 0.873063  |
| AK143260_j4      | 0.0597862 | 0.558254        | 3.22304    | 0.0183404 | 0.132805  |
| AK143260_j5      | 0.565268  | 0.905505        | 0.679788   | 0.351703  | 0.688957  |
| Htr4_j4          | 0.43902   | 0.273393        | -0.683311  | 0.00734   | 0.0682535 |
| Spink10_j2       | 0.0641264 | 0               | 0          | 1         | 1         |
| Spink10_j4       | 0.207092  | 0.170165        | 0          | 1         | 1         |
| Apcdd1_j1        | 1.94138   | 1.1707          | -0.729707  | 0.0041016 | 0.0436964 |
| St8sia3_j2       | 0.10042   | 2.21892         | 4.46574    | 0         | 0         |
| Malt1_j2         | 0.151698  | 0.0733848       | -1.04765   | 0.200077  | 0.543279  |
| mKIAA1629_j7     | 0.144153  | 0.160162        | 0          | 1         | 1         |
| mKIAA1629_j10    | 1.04567   | 0.736904        | 0          | 1         | 1         |
| Gnal             | 13.4729   | 11.0868         | 0          | 1         | 1         |
| Psmg2            | 13.2211   | 14.1043         | 0.0932876  | 0.54023   | 0.808768  |
| Cep192_j4        | 0.0813321 | 0.0496923       | -0.710803  | 0.489288  | 1         |
| Cep192_j10       | 0.219584  | 0.190082        | -0.208151  | 0.733747  | 0.906101  |
| XLOC_015817      | 0.24715   | 0.115553        | 0          | 1         | 1         |
| Rnmt_j1          | 1.8609    | 1.81362         | 0          | 1         | 1         |
| Mro_j6           | 0.20963   | 0.0996696       | -1.07262   | 0.174207  | 0.512178  |
| Mro_j2           | 0.26703   | 0.0450976       | -2.56588   | 0.0484026 | 0.253164  |
| Myo5b_j1         | 0.239725  | 0.0736805       | -1.70202   | 0.000314  | 0.0055457 |
| Myo5b_j6         | 0.0832483 | 0 -1.79769e+308 | 0.0045687  | 0.0045687 | 1         |
| BC031181_j1      | 13.8353   | 11.8803         | 0          | 1         | 1         |
| Zbtb7c_j1        | 0.359661  | 0               | 0          | 1         | 1         |
| Skor2_j1         | 0.837547  | 0.533393        | 0          | 1         | 1         |
| Hdhd2_j2         | 15.5211   | 13.7232         | -0.177618  | 0.29347   | 0.64036   |
| Pias2            | 0.425471  | 0.539929        | 0.34371    | 0.482327  | 0.775514  |
| XLOC_015845      | 0.313907  | 0.123662        | -1.34394   | 0.0392517 | 0.221197  |
| Atp5a1           | 44.631    | 77.4133         | 0          | 1         | 1         |
| XLOC_015852      | 0.141251  | 0 -1.79769e+308 | 0.0019755  | 0.0019755 | 0.0247588 |
| Mbp_j4           | 0.694037  | 2.4373          | 0          | 1         | 1         |
| XLOC_015856      | 0.162299  | 4.08E-06        | -15.28     | 0.997164  | 0.999174  |
| Zfp516_j5        | 1.8371    | 2.04502         | 0          | 1         | 1         |
| Cbln2_j4         | 0.285472  | 0.140401        | 0          | 1         | 1         |
| Rttn_j4          | 0.100089  | 0.0289743       | -1.78843   | 0.453924  | 1         |
| Rttn_j13         | 0.179829  | 0.173553        | -0.0512441 | 0.941425  | 0.982159  |
| Rttn_j14         | 0.172651  | 0.114994        | -0.58631   | 0.576701  | 0.829111  |

|              |           |                        |            |           |           |
|--------------|-----------|------------------------|------------|-----------|-----------|
| Crem         | 0.411595  | 0.88874                | 0          | 1         | 1         |
| Map3k8       | 0.238729  | 0.144989               | -0.719431  | 0.231822  | 0.57883   |
| XLOC_015870  | 0.13333   | 0.0231723              | -2.52453   | 0.172809  | 1         |
| XLOC_015872  | 0.13138   | 0 -1.79769e+308        | 0.0015224  |           | 1         |
| Arhgap12_j1  | 1.53504   | 0.503238               | 0          | 1         | 1         |
| Kif5b_j6     | 0.0719938 | 0                      | 0          | 1         | 1         |
| Usp14_j2     | 16.9385   | 18.3505                | 0          | 1         | 1         |
| Rock1_j8     | 0.241799  | 0.133534               | 0          | 1         | 1         |
| Rock1_j9     | 0.243379  | 0.0881257              | 0          | 1         | 1         |
| Zfp521_j2    | 0.3497    | 0.0214138              | 0          | 1         | 1         |
| Ss18_j3      | 1.09674   | 1.2538                 | 0          | 1         | 1         |
| Cdh2_j1      | 0.0477737 | 0 -1.79769e+308        | 0.0363043  |           | 1         |
| Trappc8_j1   | 1.00244   | 0.9471                 | 0          | 1         | 1         |
| Nol4         | 0.386941  | 0.0817462              | -2.24289   | 0.0111832 | 0.0931529 |
| Nol4_j7      | 0.18963   | 0.0990407              | -0.937094  | 0.107555  | 0.407702  |
| Zfp397os_j2  | 3.55035   | 3.40777                | 0          | 1         | 1         |
| Ino80c_j1    | 2.55517   | 3.68278                | 0.527376   | 0.0137059 | 0.10789   |
| Celf4_j14    | 6.48386   | 8.8852                 | 0          | 1         | 1         |
| Celf4_j13    | 2.80283   | 3.9238                 | 0          | 1         | 1         |
| XLOC_015919  | 6.47402   | 7.19101                | 0          | 1         | 1         |
| Syt4_j4      | 0.0968999 | 0                      | 0          | 1         | 1         |
| Slc25a46_j4  | 0.957963  | 0.502166               | 0          | 1         | 1         |
| Epb4.1l4a_j3 | 1.92229   | 4.1729                 | 0          | 1         | 1         |
| Epb4.1l4a_j4 | 0.376495  | 0.804544               | 0          | 1         | 1         |
| XLOC_015932  | 0.236489  | 0.000251502            | -9.87699   | 0.921123  | 0.975324  |
| Fam13b_j6    | 0.12869   | 0.175956               | 0          | 1         | 1         |
| Nme5_j3      | 0.339437  | 0.16737                | -1.0201    | 0.277255  | 0.62632   |
| Brd8_j1      | 6.38182   | 6.36366                | -0.0041113 | 0.971497  | 0.991962  |
| Gfra3_j4     | 10.8291   | 18.3683                | 0          | 1         | 1         |
| Cdc25c_j1    | 0.0689598 | 0.0625274              | -0.141267  | 0.905505  | 1         |
| XLOC_015948  | 0.0702131 | 0.0357814              | -0.972529  | 0.427568  | 1         |
| Sil1_j3      | 8.06218   | 8.52891                | 0          | 1         | 1         |
| Nrg2_j7      | 2.77368   | 1.93635                | -0.518462  | 0.0675629 | 0.311032  |
| Apbb3_j1     | 7.57042   | 11.4418                | 0.595873   | 0.0002544 | 0.0046833 |
| Cd14         | 0.492873  | 0.869859               | 0.819567   | 0.0226761 | 0.153721  |
| Hars_j4      | 0.837367  | 0.349475               | -1.26067   | 0.0001361 | 0.0027703 |
| Diap1_j2     | 0.456508  | 0.44537                | -0.0356354 | 0.909896  | 0.971581  |
| Diap1_j1     | 0.261211  | 0.0859179              | -1.60418   | 0.0085736 | 0.0764466 |
| Fchsd1_j2    | 0.724911  | 0.740654               | 0          | 1         | 1         |
| Arap3_j1     | 0.236362  | 0.203977               | -0.212595  | 0.793854  | 0.931239  |
| XLOC_015973  | 0.16294   | 0 -1.79769e+308        | 9.85E-07   |           | 4.09E-05  |
| XLOC_015973  | 0         | 0.0840314 1.79769e+308 | 0.0075219  |           | 1         |
| XLOC_015976  | 0.315963  | 0.123159               | -1.35923   | 0.171913  | 0.509035  |
| Pcdh1_j1     | 2.41206   | 0.983122               | -1.29482   | 1.57E-07  | 7.95E-06  |
| Pcdh1_j1     | 0.104915  | 0.0507077              | -1.04895   | 0.141951  | 1         |
| Gnpda1_j1    | 0.518092  | 0.382761               | -0.436765  | 0.161426  | 0.496287  |
| XLOC_015981  | 0.17148   | 0.0723297              | -1.24538   | 0.145736  | 0.473722  |

|                  |           |                 |            |           |           |
|------------------|-----------|-----------------|------------|-----------|-----------|
| Fgf1_j1          | 1.51973   | 0               | 0          | 1         | 1         |
| Fgf1_j6          | 5.47983   | 3.21469         | 0          | 1         | 1         |
| Nr3c1_j1         | 1.24913   | 0.490488        | 0          | 1         | 1         |
| XLOC_015994      | 0.089272  | 0.0578648       | -0.625522  | 0.716633  | 1         |
| Ppp2r2b_j4       | 10.5477   | 11.3865         | 0          | 1         | 1         |
| Dpysl3_j1        | 121.911   | 138.455         | 0          | 1         | 1         |
| Jakmip2_j5       | 0.166776  | 0.162239        | 0          | 1         | 1         |
| Mcc              | 0.712836  | 0.659785        | 0          | 1         | 1         |
| Trim36           | 3.12911   | 4.65333         | 0          | 1         | 1         |
| Trim36_j1        | 0.0989107 | 0               | 0          | 1         | 1         |
| Atg12_j4         | 0.283666  | 0.168169        | 0          | 1         | 1         |
| Atg12_j2         | 4.55702   | 4.82293         | 0          | 1         | 1         |
| Sema6a           | 1.51509   | 4.91432         | 0          | 1         | 1         |
| Lox              | 0.308003  | 0.453174        | 0.55712    | 0.0447114 | 0.241506  |
| Zfp608           | 0.117467  | 0.0927015       | -0.34159   | 0.593107  | 1         |
| Synpo_j2         | 1.78591   | 0.980733        | 0          | 1         | 1         |
| Synpo_j7         | 0.240712  | 0               | 0          | 1         | 1         |
| Ndst1_j3         | 3.26462   | 5.35001         | 0          | 1         | 1         |
| Tcof1_j3         | 2.66021   | 3.21703         | 0.27419    | 0.136721  | 0.459741  |
| Tcof1_j4         | 0.485253  | 0.1425          | -1.76778   | 0.0006395 | 0.0099808 |
| Slc6a7_j3        | 0.296859  | 0.314306        | 0.0823926  | 0.859917  | 0.955708  |
| Hmgxb3_j1        | 3.32032   | 3.06104         | 0          | 1         | 1         |
| Grpel2_j1        | 0.226191  | 0               | 0          | 1         | 1         |
| Ablim3_j7        | 0.898387  | 0.0502667       | 0          | 1         | 1         |
| Fbxo38_j6        | 0.0390229 | 0.0688008       | 0          | 1         | 1         |
| Fam38b_j2        | 0.627147  | 0.440337        | 0          | 1         | 1         |
| Afg3l2_j1        | 0.125792  | 0.0236472       | 0          | 1         | 1         |
| Ptpn2_j2         | 0.576658  | 0.566841        | -0.0247723 | 0.958628  | 0.988071  |
| 4930503L19Rik_j1 | 0.97379   | 0.891552        | 0          | 1         | 1         |
| Smad4_j1         | 2.17032   | 4.23526         | 0          | 1         | 1         |
| Elac1_j1         | 1.19316   | 0.921217        | 0          | 1         | 1         |
| Mapk4_j4         | 2.85622   | 2.57986         | 0          | 1         | 1         |
| Mapk4_j1         | 0         | 0.065918        | 0          | 1         | 1         |
| Lipg_j4          | 0.0468465 | 0 -1.79769e+308 | 0.0268855  |           | 1         |
| Lipg_j3          | 0.0470296 | 0 -1.79769e+308 | 0.0288548  |           | 1         |
| Lipg             | 0.219668  | 0.296221        | 0.43135    | 0.315156  | 0.65911   |
| XLOC_016075      | 0.0724386 | 0.00456242      | -3.98889   | 0.32314   | 1         |
| RP24-263P17.1_j2 | 0.116643  | 0.0366196       | -1.67141   | 0.153807  | 1         |
| Gm672_j6         | 0.520928  | 0.423564        | 0          | 1         | 1         |
| Gm672_j10        | 5.00503   | 4.73514         | 0          | 1         | 1         |
| Gm672_j9         | 5.08347   | 3.55573         | 0          | 1         | 1         |
| XLOC_016078      | 0.125315  | 0.0073743       | -4.08691   | 0.37813   | 1         |
| XLOC_016078      | 0.0967339 | 0 -1.79769e+308 | 0.037073   |           | 1         |
| XLOC_016078      | 0.142225  | 0.0404867       | -1.81266   | 0.347184  | 0.685853  |
| Katnal2_j8       | 0.0957521 | 0 -1.79769e+308 | 0.0111772  |           | 1         |
| Katnal2_j4       | 0.127795  | 0.116087        | -0.138624  | 0.853847  | 1         |
| Slc14a1_j1       | 0.083231  | 0 -1.79769e+308 | 0.0032069  |           | 1         |



|                  |            |           |              |           |           |
|------------------|------------|-----------|--------------|-----------|-----------|
| Slc14a2_j1       | 0.0635847  | 6.56E-05  | -9.92131     | 0.963939  | 1         |
| XLOC_016088      | 0.616758   | 0.604844  | -0.0281426   | 0.951628  | 0.986027  |
| Ctdp1_j2         | 2.47958    | 2.94262   | 0.247007     | 0.125789  | 0.44161   |
| Ctdp1_j1         | 0.258293   | 0.0520676 | -2.31055     | 0.0279168 | 0.177107  |
| Atp9b_j6         | 9.56454    | 10.9879   | 0            | 1         | 1         |
| Atp9b_j7         | 0          | 0.0913724 | 0            | 1         | 1         |
| XLOC_016096      | 0.0528979  | 0.0221273 | -1.25738     | 0.553325  | 1         |
| Zfp236_j5        | 1.08076    | 0.0291947 | 0            | 1         | 1         |
| Zfp236_j6        | 0.157717   | 0.276085  | 0            | 1         | 1         |
| Zfp407_j3        | 1.80905    | 1.97394   | 0.125846     | 0.522322  | 0.798827  |
| Zfp407_j4        | 0.397551   | 0.403612  | 0.02183      | 0.928745  | 0.978107  |
| 1700034H14Rik_j4 | 0.738649   | 0.891829  | 0.271879     | 0.58872   | 0.835743  |
| Dok6_j1          | 1.09285    | 0.549195  | 0            | 1         | 1         |
| AK014726_j1      | 0          | 0.0849365 | 1.79769e+308 | 0.039505  | 1         |
| Wac_j2           | 1.14601    | 1.64941   | 0            | 1         | 1         |
| Wac_j3           | 2.52745    | 2.32438   | 0            | 1         | 1         |
| Colec12          | 0.199888   | 0.546408  | 1.45078      | 0.0002876 | 0.005164  |
| Thoc1_j2         | 0.0397597  | 0.0522161 | 0            | 1         | 1         |
| Cables1          | 0.0717447  | 0.240579  | 1.74556      | 0.0243108 | 0.161198  |
| Cables1_j2       | 0.72465    | 0.744601  | 0.0391832    | 0.919614  | 0.974745  |
| Riok3_j1         | 4.61826    | 6.0124    | 0            | 1         | 1         |
| Riok3_j4         | 2.73084    | 3.9027    | 0            | 1         | 1         |
| 3110002H16Rik_j3 | 0.238037   | 0.316667  | 0.411782     | 0.400291  | 0.723811  |
| Lama3_j3         | 0.00948574 | 0.168865  | 4.15397      | 0.338434  | 0.678756  |
| Lama3_j7         | 0.0803114  | 0.117961  | 0.554632     | 1         | 1         |
| Cabyr            | 4.32206    | 3.1483    | 0            | 1         | 1         |
| XLOC_015625      | 0.0239317  | 0.0983983 | 2.03971      | 0.217957  | 1         |
| XLOC_015626      | 0          | 0.104731  | 1.79769e+308 | 0.0923257 | 1         |
| XLOC_015631      | 0.0415746  | 0.14681   | 1.82018      | 0.091942  | 1         |
| Gm4835_j2        | 0.112565   | 0.860155  | 2.93384      | 0.242463  | 0.589952  |
| Rnf125_j2        | 13.0971    | 12.4043   | -0.0784043   | 1         | 1         |
| 2700062C07Rik_j6 | 0.942136   | 1.37147   | 0.541715     | 0.168898  | 0.505733  |
| 2700062C07Rik_j5 | 0.319179   | 0.674062  | 1.07851      | 0.071954  | 0.322462  |
| 2700062C07Rik_j4 | 2.00883    | 1.36644   | -0.555936    | 0.100284  | 0.391964  |
| 2700062C07Rik_j7 | 0.315321   | 0.227445  | -0.471308    | 0.471362  | 0.76894   |
| 2700062C07Rik_j8 | 0.337684   | 0.374464  | 0.149155     | 0.728507  | 0.903756  |
| Pik3c3_j1        | 5.40263    | 6.83435   | 0.339144     | 0.0285396 | 0.179747  |
| Wdr33_j2         | 1.56       | 1.99277   | 0.35323      | 0.0120354 | 0.0984178 |
| Bin1_j7          | 5.54039    | 4.30805   | 0            | 1         | 1         |
| XLOC_015662      | 0.0551143  | 0.151086  | 0            | 1         | 1         |
| Camk4_j7         | 0.587618   | 0.0922954 | -2.67055     | 2.20E-11  | 2.52E-09  |
| XLOC_015669      | 0.127268   | 0.152702  | 0            | 1         | 1         |
| Egr1_j1          | 1.36128    | 2.92032   | 1.10116      | 3.83E-07  | 1.75E-05  |
| Ctnna1_j1        | 0.0356387  | 0.268956  | 0            | 1         | 1         |
| Ctnna1_j2        | 0.443687   | 0.333966  | 0            | 1         | 1         |
| Matr3_j4         | 1.54543    | 5.80343   | 0            | 1         | 1         |
| Ube2d2_j2        | 1.76717    | 1.62438   | -0.121554    | 0.664973  | 0.873063  |

|                  |           |            |              |           |           |
|------------------|-----------|------------|--------------|-----------|-----------|
| Pura_j2          | 3.33313   | 3.66252    | 0            | 1         | 1         |
| O610010012Rik_j1 | 0.145675  | 0.210485   | 0.53096      | 0.412404  | 0.73143   |
| Ankhd1_j1        | 0.931654  | 1.13524    | 0.285132     | 0.12659   | 0.443067  |
| Ankhd1_j2        | 1.46543   | 1.61656    | 0.141609     | 0.392845  | 0.718958  |
| Slc35a4_j1       | 1.64801   | 1.54923    | -0.0891704   | 0.509631  | 0.790813  |
| Ik_j2            | 13.0357   | 12.3208    | 0            | 1         | 1         |
| O610009020Rik_j8 | 0.0102938 | 1.17488    | 0            | 1         | 1         |
| Rnf14_j2         | 4.60236   | 2.70601    | -0.766207    | 0.0008469 | 0.0125306 |
| mKIAA1317_j3     | 2.87341   | 2.45953    | 0            | 1         | 1         |
| Rbm27_j1         | 0.210962  | 0.473618   | 0            | 1         | 1         |
| Ythdc2_j4        | 0         | 0.058121   | 1.79769e+308 | 0.0187397 | 1         |
| Ap3s1_j1         | 0.116055  | 0.0158583  | 0            | 1         | 1         |
| Commd10_j1       | 2.75228   | 2.67019    | -0.0436837   | 0.870468  | 0.958726  |
| Dmxl1_j6         | 0.907986  | 1.44819    | 0            | 1         | 1         |
| Dmxl1_j7         | 1.0352    | 0.00176579 | 0            | 1         | 1         |
| Dmxl1_j8         | 0.618232  | 0.638353   | 0            | 1         | 1         |
| Snx2_j2          | 20.7169   | 25.1479    | 0.279633     | 0.0154856 | 0.117492  |
| Snx2_j3          | 0.462017  | 0.459847   | -0.00679131  | 0.984985  | 0.995588  |
| XLOC_015754      | 0.18086   | 0.126828   | -0.512       | 0.503527  | 0.787092  |
| XLOC_015756      | 0.0774902 | 0.0834606  | 0.107081     | 0.935513  | 1         |
| Gramd3_j1        | 0.0839279 | 0.299874   | 1.83713      | 0.0119928 | 0.0981683 |
| Megf10_j2        | 2.87654   | 2.70879    | -0.0866895   | 0.527046  | 0.801374  |
| Ctxn3_j7         | 0.14395   | 0.529036   | 0            | 1         | 1         |
| Slc12a2_j6       | 0         | 0.239702   | 1.79769e+308 | 0.0006762 | 0.0104339 |
| A730017C20Rik_j4 | 3.78076   | 2.56274    | 0            | 1         | 1         |
| Chsy3            | 0.0818435 | 0.185599   | 1.18125      | 0.373604  | 0.706436  |
| Gm4951_j2        | 0.0325048 | 0.112588   | 1.79232      | 0.108327  | 1         |
| Rps14_j3         | 37.1035   | 43.6298    | 0            | 1         | 1         |
| Cd74_j1          | 2.31349   | 8.8646     | 1.93799      | 1.33E-15  | 2.89E-13  |
| Camk2a_j2        | 0.46534   | 3.88964    | 0            | 1         | 1         |
| Pdgfrb_j2        | 0.168942  | 0.606557   | 0            | 1         | 1         |
| Csnk1a1          | 17.6919   | 16.5779    | 0            | 1         | 1         |
| Csnk1a1_j1       | 19.237    | 18.7071    | 0            | 1         | 1         |
| Csnk1a1_j5       | 32.2983   | 30.7626    | 0            | 1         | 1         |
| AK143260_j1      | 0         | 0.0752688  | 1.79769e+308 | 0.0996246 | 1         |
| Sh3tc2_j1        | 0         | 0.134096   | 1.79769e+308 | 0.0013134 | 1         |
| Sh3tc2_j3        | 0.289271  | 0.499689   | 0.788608     | 0.0465718 | 0.247407  |
| Wdr7_j2          | 0.299318  | 0.221352   | -0.435334    | 0.291159  | 0.638436  |
| St8sia3_j1       | 0         | 0.438069   | 1.79769e+308 | 9.13E-11  | 9.41E-09  |
| Onecut2_j1       | 3.1253    | 3.3379     | 0            | 1         | 1         |
| Nedd4l_j8        | 2.48881   | 2.28291    | 0            | 1         | 1         |
| Nedd4l_j10       | 0.602601  | 0.303153   | 0            | 1         | 1         |
| XLOC_015799      | 0.0968664 | 0.0598338  | -0.695037    | 0.397732  | 1         |
| Malt1            | 0.179881  | 0.158866   | -0.179228    | 0.724318  | 0.901947  |
| mKIAA1629_j1     | 0         | 0.113024   | 0            | 1         | 1         |
| XLOC_015807      | 0.0108022 | 0.197353   | 4.19138      | 0.0639606 | 0.30009   |
| Slmo1_j2         | 0.397103  | 0.974406   | 1.29501      | 0.001304  | 0.0176801 |

|                  |            |           |              |           |           |
|------------------|------------|-----------|--------------|-----------|-----------|
| Slmo1_j5         | 0          | 0.231674  | 1.79769e+308 | 0.0064865 | 0.0621152 |
| Seh1l_j5         | 6.10961    | 6.12492   | 0.00361279   | 0.980113  | 0.994006  |
| Cep192_j3        | 0.0394999  | 0.0975213 | 1.30387      | 0.0501577 | 1         |
| Cep192_j5        | 0          | 0.0852471 | 1.79769e+308 | 0.0025627 | 1         |
| Tcf4_j3          | 0.337656   | 0.482671  | 0            | 1         | 1         |
| Tcf4_j4          | 0.0502351  | 0.504366  | 0            | 1         | 1         |
| Mbd2_j2          | 0.390253   | 0.529892  | 0.441288     | 0.240966  | 0.588146  |
| Mbd2_j1          | 0          | 0.0776785 | 1.79769e+308 | 0.0266352 | 1         |
| Mro_j5           | 0.00449793 | 0.0493329 | 3.45522      | 0.622769  | 1         |
| Mro_j10          | 0.0553789  | 0.0727626 | 0.393862     | 0.737783  | 1         |
| Cxxc1_j3         | 1.53932    | 1.84427   | 0            | 1         | 1         |
| Myo5b_j2         | 0.0753935  | 0.0446546 | -0.75563     | 0.678169  | 1         |
| Myo5b_j7         | 0.0284444  | 0.0974784 | 1.77694      | 0.13455   | 1         |
| Dym_j1           | 4.74526    | 3.08773   | 0            | 1         | 1         |
| XLOC_015839      | 0          | 0.13609   | 1.79769e+308 | 0.0104182 | 1         |
| XLOC_015839      | 0.0182687  | 0.0890808 | 2.28574      | 0.0724029 | 1         |
| Atp5a1_j1        | 0          | 0.0866822 | 0            | 1         | 1         |
| Pstpip2_j2       | 0.12942    | 0.115915  | -0.158994    | 0.887952  | 1         |
| 5430411K18Rik_j2 | 1.0367     | 0.931857  | 0            | 1         | 1         |
| Txnl4a_j1        | 15.6467    | 24.1533   | 0            | 1         | 1         |
| XLOC_015852      | 0.151397   | 0.165923  | 0.13218      | 0.842209  | 0.950214  |
| Mbp_j5           | 0.284736   | 0.46168   | 0            | 1         | 1         |
| Zadh2_j2         | 3.24759    | 3.82977   | 0            | 1         | 1         |
| XLOC_015863      | 0.0637359  | 0.0574413 | 0            | 1         | 1         |
| Neto1_j2         | 0.715772   | 2.20338   | 0            | 1         | 1         |
| Rttn_j6          | 0.0542314  | 0.0682365 | 0.331415     | 0.758537  | 1         |
| Rttn_j5          | 0.0336305  | 0.0601807 | 0.839532     | 0.526105  | 1         |
| Rttn_j11         | 0          | 0.115445  | 1.79769e+308 | 0.0155156 | 1         |
| BC062254_j1      | 0          | 0.0474086 | 1.79769e+308 | 0.167119  | 1         |
| Map3k8_j1        | 0.0202598  | 0.0608517 | 1.58668      | 0.400262  | 1         |
| Map3k8_j2        | 0          | 0.0690484 | 1.79769e+308 | 0.099389  | 1         |
| Gm10125_j2       | 0.0747692  | 0.173905  | 1.21778      | 0.109784  | 0.412306  |
| Arhgap12_j7      | 0          | 0.259009  | 0            | 1         | 1         |
| Mpp7_j1          | 0          | 0.165719  | 1.79769e+308 | 0.0004918 | 0.0080338 |
| Usp14_j3         | 36.9601    | 33.856    | 0            | 1         | 1         |
| Rock1_j1         | 2.43297    | 2.73624   | 0            | 1         | 1         |
| Ankrd29_j1       | 1.17543    | 0.900739  | 0            | 1         | 1         |
| Osbp1a_j1        | 15.5029    | 11.9469   | 0            | 1         | 1         |
| Zfp521_j3        | 0.96966    | 0.318536  | 0            | 1         | 1         |
| Zfp521_j5        | 0          | 0.120494  | 0            | 1         | 1         |
| Ss18_j7          | 0.253871   | 0.198746  | 0            | 1         | 1         |
| Ss18_j8          | 0.134789   | 0.115369  | -0.224446    | 0.921543  | 1         |
| Kctd1_j2         | 4.31284    | 3.49708   | -0.30249     | 0.140415  | 0.466064  |
| Cdh2_j5          | 0.0380679  | 0.897123  | 4.55866      | 9.95E-06  | 0.0003085 |
| Dsc2_j1          | 0.121539   | 0.0642145 | -0.920446    | 0.230045  | 1         |
| B4galt6_j4       | 0.0607267  | 0.266374  | 0            | 1         | 1         |
| Trappc8_j5       | 0.213526   | 0.672883  | 0            | 1         | 1         |

|             |             |           |              |           |           |
|-------------|-------------|-----------|--------------|-----------|-----------|
| Nol4_j2     | 0.0132187   | 0.110722  | 3.06629      | 0.0565949 | 1         |
| Nol4_j1     | 0.0362005   | 0.212545  | 2.55368      | 0.007995  | 0.0724953 |
| Nol4_j3     | 0.167343    | 0.302352  | 0.853417     | 0.0495989 | 0.257063  |
| Slc39a6_j1  | 25.0647     | 32.5527   | 0.377122     | 0.0006932 | 0.0106394 |
| Celf4_j6    | 1.65177     | 1.5659    | 0            | 1         | 1         |
| Celf4       | 1.01863     | 2.14914   | 0            | 1         | 1         |
| Syt4_j5     | 52.3896     | 73.2396   | 0            | 1         | 1         |
| Fam13b_j8   | 2.87661     | 4.84854   | 0            | 1         | 1         |
| Fam13b_j10  | 0.532296    | 0.739827  | 0            | 1         | 1         |
| Fam13b_j9   | 0.353104    | 0.0083555 | 0            | 1         | 1         |
| Nme5_j4     | 0.237771    | 0.445489  | 0.905817     | 0.307307  | 0.652263  |
| Hspa9_j5    | 7.2355      | 12.7335   | 0            | 1         | 1         |
| Sil1_j2     | 0.89486     | 0.899327  | 0            | 1         | 1         |
| Dnajc18_j2  | 3.28907     | 5.85291   | 0            | 1         | 1         |
| Tmem173_j1  | 0.267219    | 0.747036  | 1.48316      | 0.0030868 | 0.0352264 |
| Nrg2_j3     | 0.687506    | 0.675451  | -0.0255206   | 0.954404  | 0.986881  |
| Arap3_j3    | 0.122284    | 0.342051  | 1.48398      | 0.0126873 | 0.102195  |
| Arap3_j4    | 0.000578351 | 0.0804795 | 7.12053      | 0.255874  | 1         |
| Arap3_j5    | 0.299707    | 0.147785  | -1.02005     | 0.025321  | 0.165775  |
| XLOC_015975 | 0.0384404   | 0.229101  | 2.57529      | 0.004238  | 0.0447442 |
| Gnpda1_j4   | 2.61411     | 3.24297   | 0.310992     | 0.414108  | 0.732691  |
| Fgf1_j11    | 3.08393     | 3.46826   | 0            | 1         | 1         |
| Yipf5_j1    | 4.65608     | 5.12625   | 0.138788     | 0.570318  | 0.826209  |
| Prelid2_j1  | 0.0854393   | 0.0831308 | -0.0395175   | 0.97352   | 1         |
| Gm4013      | 0.363069    | 0.419027  | 0.2068       | 0.790789  | 0.930269  |
| XLOC_015994 | 0.248535    | 0.867101  | 1.80275      | 0.0010734 | 0.0151213 |
| XLOC_015994 | 0.0614515   | 0.329338  | 2.42205      | 0.0053367 | 0.0532891 |
| XLOC_015994 | 0.0402478   | 0.622601  | 3.95133      | 0.0019127 | 0.0241088 |
| Trim36_j3   | 8.72914     | 6.81078   | 0            | 1         | 1         |
| XLOC_016002 | 0.0536089   | 0.121917  | 1.18536      | 0.21949   | 1         |
| Atg12_j3    | 0           | 0.14753   | 0            | 1         | 1         |
| Sema6a_j1   | 1.7038      | 5.26899   | 0            | 1         | 1         |
| Sema6a_j2   | 0           | 0.0710463 | 0            | 1         | 1         |
| Dtwd2_j4    | 0.260729    | 0.344225  | 0.400802     | 0.459265  | 0.761406  |
| Ppic_j1     | 0.291642    | 0.426819  | 0.549427     | 0.509493  | 0.790813  |
| Zfp608_j2   | 1.38672     | 1.27664   | -0.119333    | 0.555598  | 0.818332  |
| Synpo_j3    | 0           | 0.0687438 | 0            | 1         | 1         |
| Synpo_j4    | 0           | 0.0885785 | 0            | 1         | 1         |
| Synpo_j8    | 0.255409    | 0.56272   | 0            | 1         | 1         |
| Tcof1_j2    | 0.545476    | 0.877988  | 0.686686     | 0.0132784 | 0.105622  |
| Slc6a7_j4   | 0           | 0.0580996 | 1.79769e+308 | 0.0612556 | 1         |
| Slc26a2_j2  | 0           | 0.0750411 | 1.79769e+308 | 0.270457  | 1         |
| Ppargc1b_j2 | 0.862034    | 0.387148  | 0            | 1         | 1         |
| Arhgef37_j7 | 0.000210022 | 0.0831694 | 8.62937      | 0.667615  | 1         |
| Arhgef37_j6 | 0.0391956   | 0.160819  | 2.03667      | 0.0063271 | 0.061076  |
| Pcyox1l_j5  | 2.71999     | 2.29033   | 0            | 1         | 1         |
| Ablim3_j2   | 2.38642     | 3.14654   | 0            | 1         | 1         |

|                  |             |           |              |           |           |
|------------------|-------------|-----------|--------------|-----------|-----------|
| Fbxo38_j7        | 3.6425      | 4.83812   | 0            | 1         | 1         |
| Fam38b_j9        | 37.2034     | 35.0772   | 0            | 1         | 1         |
| Fam38b_j12       | 4.05628     | 3.4875    | 0            | 1         | 1         |
| Fam38b_j11       | 6.11985     | 6.2626    | 0            | 1         | 1         |
| Lman1_j1         | 4.96188     | 5.66751   | 0.19183      | 0.172981  | 0.510725  |
| Afg3l2_j3        | 6.54892     | 9.61117   | 0            | 1         | 1         |
| Spire1_j4        | 0.00356711  | 0.942784  | 0            | 1         | 1         |
| Rab27b           | 0.875946    | 1.21585   | 0.473055     | 0.0260011 | 0.169024  |
| 2310002L13Rik    | 0.103961    | 0.213769  | 1.04001      | 0.18562   | 0.525906  |
| 4930503L19Rik_j2 | 0.000222645 | 0.444066  | 0            | 1         | 1         |
| Mapk4_j5         | 0.589813    | 1.02434   | 0            | 1         | 1         |
| Gm672_j12        | 0           | 0.608785  | 0            | 1         | 1         |
| XLOC_016078      | 0.163194    | 0.294008  | 0.849262     | 0.272522  | 0.621353  |
| Slc14a1          | 0.0376663   | 0.104654  | 1.47429      | 0.11694   | 1         |
| Setbp1_j1        | 0.0352441   | 0.195622  | 2.47262      | 0.0063655 | 0.0613499 |
| Setbp1_j2        | 0.000127768 | 0.162434  | 10.3121      | 0.932524  | 0.979532  |
| Setbp1_j3        | 0.0775425   | 0.0876908 | 0.177437     | 0.896433  | 1         |
| XLOC_016088      | 0.336885    | 0.297063  | -0.181488    | 0.619072  | 0.85046   |
| Hsbp1l1_j1       | 2.85908     | 3.03724   | 0            | 1         | 1         |
| Kcng2_j2         | 6.59881     | 7.11098   | 0            | 1         | 1         |
| Kcng2_j1         | 0.145201    | 0.188939  | 0            | 1         | 1         |
| Nfatc1_j3        | 0.199354    | 0.287764  | 0.529551     | 0.280601  | 0.629166  |
| Nfatc1_j4        | 0.0944662   | 0.209368  | 1.14817      | 0.0972924 | 0.385538  |
| Atp9b_j8         | 0.413711    | 1.08173   | 0            | 1         | 1         |
| Zfp236_j3        | 0.164457    | 0.10373   | 0            | 1         | 1         |
| 1700034H14Rik_j1 | 0.101007    | 0.125603  | 0.314417     | 0.710097  | 1         |
| Socs6_j2         | 0           | 0.200416  | 1.79769e+308 | 8.44E-05  | 0.0018558 |
| Cis4_j4          | 1.08978     | 1.30067   | 0.25522      | 0.311902  | 0.656418  |
| Cis4_j3          | 0.0997703   | 0.156934  | 0.653479     | 0.247848  | 1         |
| Dok6_j2          | 1.17513     | 1.52091   | 0            | 1         | 1         |
| Svil_j5          | 0.00113303  | 0.238165  | 7.71563      | 0.021895  | 0.150018  |
| Svil_j4          | 0           | 0.0780303 | 1.79769e+308 | 0.0029877 | 1         |
| Svil_j6          | 0           | 0.0549508 | 1.79769e+308 | 0.0105281 | 1         |
| Zeb1_j2          | 0           | 0.654283  | 0            | 1         | 1         |
| XLOC_015608      | 0.0299276   | 0.154956  | 0            | 1         | 1         |
| Colec12_j2       | 0.230157    | 0.430549  | 0.903561     | 0.0358757 | 0.208963  |
| Thoc1_j1         | 6.23513     | 6.76826   | 0            | 1         | 1         |
| Greb1l_j4        | 0           | 0.165939  | 1.79769e+308 | 0.0004372 | 0.0072661 |
| Greb1l_j7        | 0.14786     | 0.283199  | 0.937579     | 0.089827  | 0.36783   |
| Lama3_j8         | 0.301       | 0.342131  | 0.184786     | 0.603408  | 0.843376  |
| Ttc39c_j1        | 14.076      | 16.2947   | 0.211161     | 0.0875221 | 0.362018  |
| XLOC_015622      | 0.0661165   | 0.113234  | 0            | 1         | 1         |
| Cabyr_j1         | 0.276877    | 0.422152  | 0            | 1         | 1         |
| XLOC_015624      | 0.0512811   | 0.0626007 | 0.287752     | 0.83796   | 1         |
| XLOC_015631      | 0.112769    | 0.148406  | 0.396172     | 0.677986  | 1         |
| TRIF             | 0           | 0.0556417 | 1.79769e+308 | 0.0737917 | 1         |
| Rnf138_j1        | 0.0416547   | 0.0860933 | 1.04742      | 0.36994   | 1         |

|                  |            |           |              |           |           |
|------------------|------------|-----------|--------------|-----------|-----------|
| Asxl3_j2         | 2.08E-05   | 0.125113  | 0            | 1         | 1         |
| 2700062C07Rik_j1 | 0.0378901  | 0.0567364 | 0.582455     | 0.537723  | 1         |
| XLOC_015646      | 0.145528   | 0.210435  | 0.532083     | 0.24918   | 0.596644  |
| Mocos_j3         | 0.0769514  | 0.187784  | 1.28705      | 0.109646  | 0.412055  |
| AW554918_j3      | 0          | 0.130339  | 1.79769e+308 | 0.0004792 | 1         |
| Ammecr1_j2       | 0.305161   | 0.433362  | 0            | 1         | 1         |
| Ammecr1_j1       | 0          | 0.0684322 | 0            | 1         | 1         |
| Wdr33_j6         | 0          | 0.397734  | 1.79769e+308 | 1.28E-11  | 1.52E-09  |
| lws1_j1          | 1.66104    | 1.34068   | 0            | 1         | 1         |
| lws1_j2          | 0.355295   | 0.487673  | 0            | 1         | 1         |
| Wdr36_j1         | 1.37011    | 1.50152   | 0            | 1         | 1         |
| Wdr36_j2         | 3.16814    | 3.14773   | 0            | 1         | 1         |
| Camk4_j1         | 0.0887583  | 0.123936  | 0.48164      | 0.467052  | 1         |
| Apc_j4           | 0.0436353  | 0.0590376 | 0            | 1         | 1         |
| Apc_j7           | 0.0370779  | 0.0695416 | 0            | 1         | 1         |
| Fam53c           | 0.0654783  | 0.0301545 | 0            | 1         | 1         |
| Fam53c_j5        | 0.0574256  | 0.448188  | 0            | 1         | 1         |
| Fam53c_j6        | 7.63138    | 11.1719   | 0            | 1         | 1         |
| Kdm3b_j2         | 2.44555    | 2.86545   | 0            | 1         | 1         |
| Paip2_j1         | 5.24848    | 10.945    | 1.06029      | 0.0002288 | 0.0042901 |
| Ube2d2_j6        | 1.78378    | 1.69801   | -0.0710875   | 0.714311  | 0.896527  |
| 0610010O12Rik_j3 | 0.0530678  | 0.128434  | 1.27511      | 0.339399  | 1         |
| 0610010O12Rik_j7 | 48.0879    | 56.1641   | 0.223974     | 0.0924873 | 0.374196  |
| Ankhd1_j3        | 0.225156   | 0.212254  | -0.0851335   | 0.813516  | 0.939156  |
| Pcdha2_j3        | 69.0943    | 65.6664   | 0            | 1         | 1         |
| XLOC_015708      | 0.116535   | 0.139429  | 0.258771     | 0.588088  | 1         |
| XLOC_015708      | 0.0704406  | 0.0344353 | -1.03252     | 0.237329  | 1         |
| XLOC_015709      | 0.126407   | 0.0510183 | -1.30899     | 0.257213  | 1         |
| XLOC_015709      | 0.0545285  | 0.199214  | 1.86924      | 0.126899  | 0.443747  |
| 0610009O20Rik_j1 | 1.11264    | 1.03453   | 0            | 1         | 1         |
| Ndfip1_j2        | 66.4286    | 70.0824   | 0            | 1         | 1         |
| 9630014M24Rik_j6 | 0.462893   | 1.16493   | 0            | 1         | 1         |
| mKIAA1317_j5     | 0.00214853 | 1.1376    | 0            | 1         | 1         |
| XLOC_015728      | 0.937057   | 0.727788  | 0            | 1         | 1         |
| Stk32a_j2        | 0.362823   | 1.14096   | 0            | 1         | 1         |
| Kcnn2_j2         | 1.45756    | 1.31302   | -0.150662    | 0.681754  | 0.880565  |
| XLOC_015739      | 0.0842615  | 0.144291  | 0.776032     | 0.275016  | 1         |
| Ap3s1_j3         | 1.04052    | 0.860008  | 0            | 1         | 1         |
| Ap3s1_j6         | 12.4431    | 12.1264   | 0            | 1         | 1         |
| Dmxl1_j10        | 0.42205    | 0.554295  | 0            | 1         | 1         |
| Tnfaip8_j1       | 0          | 0.274662  | 1.79769e+308 | 0.0048041 | 0.0492313 |
| Sncaip           | 7.54E-05   | 0.191514  | 11.3112      | 0.955228  | 0.987121  |
| Snx2_j1          | 9.74757    | 8.64871   | -0.172557    | 0.183768  | 0.524378  |
| AK036466_j2      | 0.314732   | 0.378128  | 0.264752     | 0.54579   | 0.812631  |
| XLOC_015756      | 0.10897    | 0.126963  | 0.220476     | 0.844694  | 1         |
| Lmnbl1_j1        | 0.622732   | 0.642197  | 0.0444035    | 0.921261  | 0.975363  |
| Ctxn3_j8         | 0.685352   | 0.858758  | 0            | 1         | 1         |

|                  |            |                        |            |           |           |
|------------------|------------|------------------------|------------|-----------|-----------|
| Slc12a2_j3       | 4.5977     | 3.7547                 | -0.292213  | 0.0881784 | 0.363523  |
| A730017C20Rik_j2 | 2.57581    | 1.92671                | 0          | 1         | 1         |
| A730017C20Rik    | 0.754588   | 2.81906                | 0          | 1         | 1         |
| Csf1r_j3         | 2.45365    | 3.82685                | 0          | 1         | 1         |
| AK143260_j6      | 0          | 0.231194 1.79769e+308  |            | 0.0192214 | 0.137133  |
| Sh3tc2_j4        | 1.35324    | 1.2913                 | -0.0675901 | 0.851153  | 0.952679  |
| XLOC_015794      | 0.0271047  | 0.136115               | 2.32821    | 0.248372  | 1         |
| XLOC_015798      | 17.3364    | 14.9654                | -0.212175  | 0.152062  | 0.483508  |
| Nedd4l_j3        | 11.8554    | 5.88985                | 0          | 1         | 1         |
| Nedd4l_j6        | 10.542     | 17.1219                | 0          | 1         | 1         |
| XLOC_015799      | 0.416643   | 0.458914               | 0.139414   | 0.578863  | 0.83051   |
| Malt1_j7         | 0.305339   | 0.232951               | -0.390381  | 0.416094  | 0.733677  |
| Malt1_j9         | 0          | 0.17809 1.79769e+308   |            | 0.0017236 | 0.0221971 |
| mKIAA1629_j2     | 0          | 0.120358               | 0          | 1         | 1         |
| mKIAA1629_j4     | 1.09318    | 1.035                  | 0          | 1         | 1         |
| 5330437102Rik_j1 | 0.0403961  | 0.103802               | 1.36155    | 0.445453  | 1         |
| XLOC_015807      | 0.0725446  | 0.568734               | 2.97081    | 0.0005099 | 0.0082712 |
| XLOC_015807      | 0.0170834  | 0.181357               | 3.40817    | 0.0083661 | 0.075018  |
| Impa2_j1         | 1.16385    | 0.872679               | -0.415388  | 0.078353  | 0.339336  |
| Slmo1_j3         | 0.248578   | 0.263982               | 0.0867452  | 0.881387  | 0.962332  |
| Seh1l_j2         | 1.67914    | 1.79159                | 0.0935216  | 0.777004  | 0.924635  |
| Cep192_j6        | 0.255976   | 0.230792               | -0.149416  | 0.699687  | 0.889447  |
| D18Ert653e_j2    | 0.771014   | 1.00449                | 0          | 1         | 1         |
| D18Ert653e_j5    | 0.0350379  | 0.0683263              | 0          | 1         | 1         |
| Rnmt_j3          | 4.79109    | 5.24408                | 0          | 1         | 1         |
| Tcf4_j2          | 0.00115444 | 0.354397               | 0          | 1         | 1         |
| Tcf4_j5          | 0          | 0.0751318              | 0          | 1         | 1         |
| Mro_j1           | 0          | 0.099218 1.79769e+308  |            | 0.0418745 | 1         |
| Mro_j11          | 0.299766   | 0.312879               | 0.0617679  | 0.927788  | 0.977629  |
| AK036329         | 0.237601   | 0.222478               | -0.0948815 | 0.854485  | 0.953933  |
| Myo5b_j5         | 0          | 0.0587619 1.79769e+308 |            | 0.0957527 | 1         |
| Zbtb7c_j2        | 0.344456   | 0.418273               | 0          | 1         | 1         |
| Smad2_j3         | 5.28352    | 9.00955                | 0.769956   | 5.67E-06  | 0.0001885 |
| Pias2            | 0.725717   | 0.844546               | 0.21877    | 0.581159  | 0.832113  |
| St8sia5_j4       | 2.03461    | 1.27561                | -0.673563  | 0.0070761 | 0.0664631 |
| Atp5a1_j3        | 0.261085   | 0.26618                | 0          | 1         | 1         |
| Pqlc1_j1         | 12.0876    | 10.657                 | 0          | 1         | 1         |
| Pqlc1_j2         | 10.8538    | 12.3498                | 0          | 1         | 1         |
| Mbp_j6           | 1.26986    | 2.67869                | 0          | 1         | 1         |
| Mbp_j7           | 1.18576    | 1.57177                | 0          | 1         | 1         |
| Zfp516_j1        | 3.59349    | 3.01867                | 0          | 1         | 1         |
| Neto1_j1         | 0.221698   | 0.391752               | 0          | 1         | 1         |
| Rtnn_j7          | 0          | 0.0906538 1.79769e+308 |            | 0.0409841 | 1         |
| Rtnn_j10         | 0          | 0.179797 1.79769e+308  |            | 0.0018227 | 0.0232179 |
| Crem_j4          | 0.0891385  | 0.170347               | 0          | 1         | 1         |
| Map3k8_j4        | 0.028703   | 0.094818               | 1.72396    | 0.120178  | 1         |
| Zfp438_j2        | 0.0616071  | 0.382959               | 2.63602    | 0.0002945 | 0.0052647 |

|              |           |           |              |           |           |
|--------------|-----------|-----------|--------------|-----------|-----------|
| Arhgap12_j3  | 3.26187   | 2.48735   | 0            | 1         | 1         |
| Kif5b_j2     | 0.259386  | 0.319488  | 0            | 1         | 1         |
| Kif5b_j3     | 8.47643   | 10.6631   | 0            | 1         | 1         |
| Mkx_j2       | 0.982002  | 0.874795  | -0.166781    | 0.51886   | 0.796709  |
| Usp14_j1     | 0.427255  | 0.512297  | 0            | 1         | 1         |
| Usp14_j4     | 11.6147   | 11.0082   | 0            | 1         | 1         |
| Rock1_j7     | 0.736644  | 1.05927   | 0            | 1         | 1         |
| Osbpl1a_j4   | 0         | 0.192267  | 0            | 1         | 1         |
| Osbpl1a_j5   | 0         | 0.0509721 | 0            | 1         | 1         |
| Osbpl1a      | 4.81477   | 4.63522   | 0            | 1         | 1         |
| Osbpl1a_j6   | 2.21551   | 2.26704   | 0            | 1         | 1         |
| XLOC_015893  | 0.0992913 | 0.0947816 | -0.0670609   | 0.94374   | 1         |
| Ss18_j1      | 1.08714   | 3.69894   | 0            | 1         | 1         |
| Chst9_j3     | 0.840973  | 0.327692  | -1.35972     | 0.0059065 | 0.0578066 |
| Cdh2_j4      | 0         | 0.395646  | 1.79769e+308 | 0.0001573 | 0.0031385 |
| Trappc8_j4   | 4.68415   | 7.74356   | 0            | 1         | 1         |
| Nol4_j4      | 0         | 0.196729  | 1.79769e+308 | 0.0010445 | 0.0147877 |
| XLOC_015910  | 0         | 0.0838259 | 0            | 1         | 1         |
| Zfp397os_j1  | 0.0531535 | 0.145569  | 0            | 1         | 1         |
| Celf4_j7     | 10.4952   | 14.8178   | 0            | 1         | 1         |
| Celf4_j8     | 0.120839  | 0.140728  | 0            | 1         | 1         |
| Celf4_j9     | 3.87802   | 5.14494   | 0            | 1         | 1         |
| Celf4_j10    | 4.06848   | 5.16883   | 0            | 1         | 1         |
| Syt4_j2      | 0         | 0.142845  | 0            | 1         | 1         |
| Slc25a46_j1  | 29.0504   | 23.023    | 0            | 1         | 1         |
| Epb4.1l4a_j1 | 0         | 0.125424  | 0            | 1         | 1         |
| Epb4.1l4a_j2 | 1.78507   | 2.95251   | 0            | 1         | 1         |
| Fam13b_j11   | 0.676649  | 1.00889   | 0            | 1         | 1         |
| Fam13b_j7    | 0.707534  | 1.05093   | 0            | 1         | 1         |
| Gfra3_j2     | 1.13265   | 2.43946   | 0            | 1         | 1         |
| Hspa9_j4     | 0         | 3.04301   | 0            | 1         | 1         |
| Spata24_j1   | 0.511372  | 0.80178   | 0.648834     | 0.263365  | 0.612228  |
| Ecscr_j1     | 0.180319  | 0.294284  | 0.706653     | 0.40615   | 0.727665  |
| Pfdn1_j1     | 59.9341   | 59.358    | -0.0139354   | 0.908811  | 0.971253  |
| Hars_j5      | 3.44827   | 4.12548   | 0.25869      | 0.0468238 | 0.248242  |
| Diap1_j7     | 0.829285  | 0.531463  | -0.6419      | 0.0762465 | 0.33358   |
| Diap1_j6     | 4.97422   | 5.71161   | 0.199425     | 0.145794  | 0.473762  |
| Diap1_j10    | 0         | 0.0534044 | 1.79769e+308 | 0.0806811 | 1         |
| Fchsd1_j3    | 0.740791  | 0.707434  | 0            | 1         | 1         |
| Arap3_j10    | 0         | 0.166741  | 1.79769e+308 | 0.0001072 | 0.0022857 |
| Arap3_j11    | 0.40097   | 0.222681  | -0.848519    | 0.0331786 | 0.198717  |
| XLOC_015973  | 0.164704  | 0.122503  | -0.427059    | 0.561888  | 0.821834  |
| XLOC_015975  | 0.147803  | 0.201722  | 0.448694     | 0.199456  | 0.542402  |
| Pcdh12_j1    | 0.0275181 | 0.23887   | 3.11777      | 0.0007774 | 0.0117108 |
| Fgf1_j3      | 42.0878   | 23.4052   | 0            | 1         | 1         |
| Grxcr2_j1    | 0         | 0.218542  | 1.79769e+308 | 0.0142572 | 0.110928  |
| Ppp2r2b_j3   | 0         | 8.43504   | 0            | 1         | 1         |



|                  |             |           |              |           |           |
|------------------|-------------|-----------|--------------|-----------|-----------|
| Jakmip2_j1       | 0.222359    | 0.0611033 | 0            | 1         | 1         |
| Mcc_j1           | 0.636812    | 0.44943   | 0            | 1         | 1         |
| Mcc_j6           | 0           | 0.0992521 | 1.79769e+308 | 0.057018  | 1         |
| Trim36_j8        | 28.8458     | 36.6207   | 0            | 1         | 1         |
| Pggt1b_j2        | 1.82345     | 1.64189   | 0            | 1         | 1         |
| Sema6a_j4        | 0.568481    | 0.806098  | 0            | 1         | 1         |
| Cep120_j1        | 18.8836     | 20.7125   | 0.133368     | 0.257537  | 0.606306  |
| Zfp608_j1        | 0.0765303   | 0.225619  | 1.55978      | 0.0134907 | 0.106684  |
| C330018D20Rik_j1 | 0.827077    | 1.20299   | 0.540528     | 0.0782508 | 0.339122  |
| 2010002N04Rik_j1 | 1.68263     | 3.50226   | 0            | 1         | 1         |
| Synpo_j6         | 0.697978    | 0.610155  | 0            | 1         | 1         |
| Ndst1_j1         | 0.098706    | 0.318     | 0            | 1         | 1         |
| Slc6a7_j1        | 0.427977    | 0.391128  | -0.129895    | 0.798412  | 0.933105  |
| Slc6a7_j2        | 0           | 0.173537  | 1.79769e+308 | 0.001608  | 0.0209279 |
| Ppargc1b_j3      | 0.000119562 | 0.302596  | 0            | 1         | 1         |
| Arhgef37_j5      | 0.0614372   | 0.0808366 | 0.395896     | 0.62246   | 1         |
| Pcyox1l_j1       | 8.6356      | 8.92948   | 0            | 1         | 1         |
| Pcyox1l_j3       | 1.09148     | 1.28222   | 0            | 1         | 1         |
| Pcyox1l_j4       | 0           | 0.0484143 | 0            | 1         | 1         |
| Afap1l1_j1       | 0.787066    | 0.955357  | 0.279557     | 0.384531  | 0.713264  |
| Fbxo38_j4        | 0.119904    | 0.0688272 | 0            | 1         | 1         |
| Fam38b_j15       | 0.135177    | 0.166146  | 0            | 1         | 1         |
| Mppe1_j1         | 7.30818     | 6.08263   | 0            | 1         | 1         |
| Afg3l2_j2        | 12.669      | 20.568    | 0            | 1         | 1         |
| Cep76_j3         | 0.820922    | 0.580913  | -0.498923    | 0.0802642 | 0.344599  |
| Ptpn2_j3         | 0.534189    | 0.574335  | 0.104542     | 0.821804  | 0.94254   |
| Rab27b_j1        | 0.173992    | 0.105748  | -0.718399    | 0.193653  | 0.535932  |
| Rab27b_j3        | 0.0588744   | 0.0783117 | 0.411588     | 0.569938  | 1         |
| 4930503L19Rik_j3 | 1.35009     | 1.32665   | 0            | 1         | 1         |
| Poli_j5          | 0           | 0.0908846 | 1.79769e+308 | 0.0296648 | 1         |
| Me2_j1           | 5.37708     | 4.16783   | -0.367525    | 0.0010885 | 0.0152642 |
| Gm672_j4         | 0           | 0.380318  | 0            | 1         | 1         |
| Gm672_j5         | 0           | 0.313736  | 0            | 1         | 1         |
| XLOC_016078      | 0.0440199   | 0.101392  | 1.20372      | 0.351453  | 1         |
| Katnal2_j9       | 0.192764    | 0.132815  | -0.537422    | 0.570913  | 0.826488  |
| Katnal2_j10      | 0           | 0.0842166 | 1.79769e+308 | 0.0926393 | 1         |
| Nfatc1_j1        | 0.162689    | 0.534656  | 1.7165       | 0.0064328 | 0.0617783 |
| Nfatc1           | 0.134596    | 0.197584  | 0.553828     | 0.313611  | 0.657912  |
| Atp9b_j10        | 0           | 0.0648225 | 0            | 1         | 1         |
| Atp9b_j11        | 0.110748    | 0.0423315 | 0            | 1         | 1         |
| Atp9b_j12        | 1.63801     | 1.18266   | 0            | 1         | 1         |
| Zfp236_j7        | 0.792141    | 1.64221   | 0            | 1         | 1         |
| Zfp236_j8        | 0.156044    | 0.341861  | 0            | 1         | 1         |
| Cndp2_j2         | 0.00170345  | 5.31632   | 11.6078      | 0.0515132 | 0.263177  |
| 1700034H14Rik_j5 | 1.13319     | 1.17444   | 0.0515762    | 0.920273  | 0.975018  |
| Socs6            | 0.030097    | 0.226226  | 2.91008      | 0.0002441 | 0.0045303 |
| Gm6225           | 0.075229    | 0.155072  | 0            | 1         | 1         |

|                  |             |           |              |           |           |
|------------------|-------------|-----------|--------------|-----------|-----------|
| Mtpap_j1         | 0           | 0.192575  | 1.79769e+308 | 0.0317628 | 0.192965  |
| Svil_j10         | 1.67325     | 2.12675   | 0.345995     | 0.128221  | 0.44626   |
| Zeb1_j1          | 0.000397944 | 1.49303   | 0            | 1         | 1         |
| Rbbp8_j4         | 0.566779    | 0.66321   | 0.22668      | 0.541426  | 0.809449  |
| Riok3_j3         | 7.50571     | 10.5667   | 0            | 1         | 1         |
| Lama3_j9         | 0.393175    | 0.413524  | 0.0728003    | 0.875954  | 0.960645  |
| Lama3_j10        | 0.0913271   | 0.151219  | 0.727522     | 0.511985  | 1         |
| Lama3_j12        | 0.211534    | 0.686161  | 1.69766      | 0.0047805 | 0.0490621 |
| Rnf125_j1        | 0.105945    | 0.131004  | 0.306285     | 0.651281  | 1         |
| Rnf138_j3        | 0.191322    | 0.126611  | -0.595605    | 0.44326   | 0.751213  |
| AW554918_j4      | 1.07578     | 0.95838   | -0.166711    | 0.509541  | 0.790813  |
| Wdr33_j1         | 0           | 0.202995  | 1.79769e+308 | 2.36E-07  | 1.15E-05  |
| Map3k2_j2        | 0.190402    | 0.169964  | 0            | 1         | 1         |
| Map3k2_j3        | 0.346524    | 0.462286  | 0            | 1         | 1         |
| Bin1_j6          | 18.4514     | 27.1713   | 0            | 1         | 1         |
| Camk4_j9         | 0.0841395   | 0.451507  | 2.42389      | 1.08E-11  | 1.31E-09  |
| Pkd2l2_j3        | 0.0567398   | 0.223149  | 1.97557      | 0.081605  | 0.347964  |
| Pkd2l2_j4        | 0.488151    | 0.672975  | 0.463224     | 0.242725  | 0.590089  |
| Pkd2l2_j5        | 0.0855407   | 0.224392  | 1.39134      | 0.0365136 | 0.211245  |
| Fam53c_j2        | 0.0208699   | 0.0968525 | 0            | 1         | 1         |
| Fam53c_j4        | 0           | 0.0496155 | 0            | 1         | 1         |
| Ctnna1           | 0.78246     | 0.684252  | 0            | 1         | 1         |
| Matr3_j3         | 13.329      | 21.2268   | 0            | 1         | 1         |
| XLOC_015679      | 0.128813    | 0.130148  | 0            | 1         | 1         |
| 0610010012Rik_j4 | 56.4232     | 55.0227   | -0.0362615   | 0.827918  | 0.944579  |
| 0610010012Rik    | 6.88559     | 7.90399   | 0.199002     | 1         | 1         |
| Ankhd1_j8        | 1.09117     | 0.783117  | -0.478583    | 0.0227469 | 0.153992  |
| Ankhd1_j7        | 0.205755    | 0.0110531 | -4.21841     | 0.0013985 | 0.0186916 |
| Ankhd1_j9        | 3.99171     | 4.00687   | 0.00546608   | 0.967695  | 0.990878  |
| Ik_j3            | 19.6052     | 21.0078   | 0            | 1         | 1         |
| Wdr55_j1         | 0.222168    | 0.170802  | -0.379326    | 0.66622   | 0.873541  |
| XLOC_015709      | 0.0165251   | 0.136318  | 3.04425      | 0.18896   | 1         |
| 0610009020Rik_j3 | 1.28454     | 1.98918   | 0            | 1         | 1         |
| XLOC_015714      | 0.0708507   | 0.0897276 | 0.34077      | 0.796611  | 1         |
| XLOC_015716      | 2.54679     | 3.92447   | 0.623816     | 0.0010178 | 0.0144981 |
| 9630014M24Rik_j3 | 0.0987731   | 0.236398  | 0            | 1         | 1         |
| Arhgap26_j1      | 0.238586    | 0.128998  | 0            | 1         | 1         |
| Arhgap26_j2      | 1.34907     | 1.502     | 0            | 1         | 1         |
| XLOC_015724      | 0.0247742   | 0.128353  | 2.3732       | 0.222664  | 1         |
| Commd10_j3       | 0           | 0.197483  | 1.79769e+308 | 0.0350674 | 0.205929  |
| Dmxl1_j12        | 0.0706704   | 0.0420787 | 0            | 1         | 1         |
| Dmxl1_j11        | 0.550465    | 0.108292  | 0            | 1         | 1         |
| Tnfaip8_j2       | 0           | 0.0991874 | 1.79769e+308 | 0.0655067 | 1         |
| Prr16            | 0.0868603   | 0.106482  | 0.293846     | 0.800194  | 1         |
| XLOC_015754      | 0.46333     | 0.436393  | -0.0864133   | 0.711782  | 0.895383  |
| Prrc1_j1         | 0           | 0.15454   | 1.79769e+308 | 0.0010027 | 1         |
| Ctxn3_j5         | 3.87634     | 3.1842    | 0            | 1         | 1         |

|                  |             |                        |            |           |           |
|------------------|-------------|------------------------|------------|-----------|-----------|
| Slc12a2_j4       | 22.5479     | 20.2585                | -0.154463  | 0.110968  | 0.41459   |
| XLOC_015764      | 0.022968    | 0.096396               | 2.06935    | 0.286491  | 1         |
| Isoc1_j2         | 0           | 0.826671               | 0          | 1         | 1         |
| A730017C20Rik_j1 | 0.277799    | 0.235727               | 0          | 1         | 1         |
| Rps14            | 2.32285     | 2.00512                | 0          | 1         | 1         |
| Rps14_j6         | 0.220622    | 0.3329                 | 0          | 1         | 1         |
| Csf1r_j2         | 0.975571    | 4.75443                | 0          | 1         | 1         |
| Htr4_j2          | 0           | 0.0866861 1.79769e+308 |            | 0.0066315 | 1         |
| XLOC_015798      | 0.0509672   | 0.122585               | 1.26614    | 0.485402  | 1         |
| Nedd4l_j1        | 7.83521     | 8.83467                | 0          | 1         | 1         |
| Nedd4l_j9        | 4.44258     | 2.38079                | 0          | 1         | 1         |
| Nedd4l_j11       | 2.87468     | 7.7525                 | 0          | 1         | 1         |
| Malt1_j4         | 0           | 0.135532 1.79769e+308  |            | 0.001806  | 1         |
| mKIAA1629_j5     | 0.307316    | 0.47218                | 0          | 1         | 1         |
| mKIAA1629_j8     | 0.299924    | 0.437087               | 0          | 1         | 1         |
| XLOC_015807      | 0           | 0.146103 1.79769e+308  |            | 0.0370894 | 1         |
| Gnal_j2          | 39.4636     | 45.561                 | 0          | 1         | 1         |
| Seh1l_j4         | 0.339901    | 0.138502               | -1.2952    | 0.0725899 | 0.32416   |
| Cep192_j8        | 0.0643916   | 0.0877591              | 0.446677   | 0.518396  | 1         |
| D18Ert653e_j4    | 0           | 0.0835695              | 0          | 1         | 1         |
| Ccdc68_j2        | 0.329957    | 0.18229                | 0          | 1         | 1         |
| Stard6_j1        | 0.0474597   | 0.19311                | 2.02465    | 0.188574  | 0.530176  |
| Mro_j9           | 0.0449303   | 0.115647               | 1.36397    | 0.435547  | 1         |
| Mro_j13          | 0.144301    | 0.0774124              | -0.898443  | 0.401194  | 0.724522  |
| Mbd1_j1          | 1.48375     | 1.59018                | 0          | 1         | 1         |
| Myo5b_j3         | 0           | 0.0575907 1.79769e+308 |            | 0.0963992 | 1         |
| Myo5b_j9         | 0.254094    | 0.113559               | -1.16192   | 0.215644  | 0.561479  |
| Acaa2_j1         | 9.3944      | 7.89258                | -0.251304  | 0.205901  | 0.550399  |
| Dym_j5           | 3.07685     | 8.29175                | 0          | 1         | 1         |
| Zbtb7c           | 0.184004    | 0.188746               | 0          | 1         | 1         |
| Skor2_j5         | 0.748122    | 0.645345               | 0          | 1         | 1         |
| Hdhd2_j1         | 3.79526     | 3.71729                | -0.0299479 | 0.917749  | 0.974387  |
| Pias2            | 0           | 0.280578 1.79769e+308  |            | 0.0044344 | 0.0464345 |
| Txnl4a           | 12.1039     | 12.0237                | 0          | 1         | 1         |
| XLOC_015852      | 0.214792    | 0.143044               | -0.586478  | 0.614772  | 0.847855  |
| Mbp_j8           | 91.9541     | 117.135                | 0          | 1         | 1         |
| Zfp516_j2        | 0.0851032   | 0.115294               | 0          | 1         | 1         |
| Fbxo15_j1        | 0.0169294   | 0.509759               | 4.91221    | 0.0772451 | 0.336374  |
| Rttn_j16         | 0.130308    | 0.16281                | 0.321263   | 0.773206  | 0.923062  |
| Gm10125_j3       | 0           | 0.351732 1.79769e+308  |            | 0.000123  | 0.0025535 |
| Arhgap12_j2      | 1.02697     | 1.80769                | 0          | 1         | 1         |
| Epc1_j2          | 0.249688    | 0.530277               | 0          | 1         | 1         |
| Mpp7_j5          | 0.37172     | 0.534421               | 0.523762   | 0.109052  | 0.410758  |
| Rock1_j5         | 0.000105436 | 0.0664455              | 0          | 1         | 1         |
| Ospl1a_j3        | 0.237971    | 0.525583               | 0          | 1         | 1         |
| Cdh2_j2          | 0.00239455  | 0.407235               | 7.40996    | 0.0168745 | 0.125119  |
| B4galt6_j3       | 13.6535     | 9.68438                | 0          | 1         | 1         |

|                  |             |           |              |           |           |
|------------------|-------------|-----------|--------------|-----------|-----------|
| Nol4             | 0           | 0.114062  | 1.79769e+308 | 0.0845636 | 1         |
| Zfp397os_j4      | 0.0920529   | 0.0792702 |              | 0 1       | 1         |
| Rprd1a_j1        | 8.36772     | 8.25241   |              | 0 1       | 1         |
| Celf4_j1         | 0.321091    | 0.645289  |              | 0 1       | 1         |
| Celf4_j2         | 1.19838     | 1.24233   |              | 0 1       | 1         |
| Rit2_j1          | 5.84367     | 8.35616   | 0.515966     | 0.0049742 | 0.0505188 |
| Slc25a46_j2      | 0           | 0.266753  |              | 0 1       | 1         |
| 4933408B17Rik_j1 | 0.290464    | 0.294171  | 0.0182949    | 0.97453   | 0.992738  |
| Brd8_j3          | 2.43936     | 2.29893   | -0.0855401   | 0.663135  | 0.872404  |
| XLOC_015940      | 0.00549457  | 0.0679902 | 3.62925      | 0.532684  | 1         |
| Cdc25c_j2        | 0.0734556   | 0.175218  | 1.25421      | 0.172847  | 0.51052   |
| Hspa9_j2         | 13.7322     | 12.0666   |              | 0 1       | 1         |
| Hspa9_j3         | 0           | 0.149314  |              | 0 1       | 1         |
| Apbb3_j4         | 4.67312     | 3.78287   | -0.304904    | 0.0429364 | 0.23482   |
| Cd14_j1          | 0.197098    | 0.560927  | 1.5089       | 0.0134575 | 0.106582  |
| Diap1_j8         | 0           | 0.568948  | 1.79769e+308 | 1.44E-06  | 5.68E-05  |
| Fchsd1_j1        | 7.71868     | 7.32943   |              | 0 1       | 1         |
| Arap3_j6         | 0.870332    | 0.958859  | 0.139752     | 0.738879  | 0.908304  |
| Arap3_j7         | 0           | 0.251358  | 1.79769e+308 | 0.007224  | 0.0675013 |
| Arap3            | 0.0262889   | 0.209823  | 2.99665      | 0.0004176 | 0.007007  |
| Pcdh1_j3         | 0           | 1.50881   | 1.79769e+308 | 3.16E-15  | 6.38E-13  |
| XLOC_015981      | 0.148545    | 0.101334  | -0.55178     | 0.590595  | 0.836692  |
| Fgf1_j9          | 14.649      | 22.1708   |              | 0 1       | 1         |
| Fgf1_j10         | 37.0992     | 21.7702   |              | 0 1       | 1         |
| Nr3c1_j4         | 0.619142    | 0.618413  |              | 0 1       | 1         |
| XLOC_015988      | 0.0705832   | 0.156437  | 1.14818      | 0.464291  | 1         |
| XLOC_015988      | 0           | 0.104552  | 1.79769e+308 | 0.0846684 | 1         |
| XLOC_015988      | 0           | 0.0761864 | 1.79769e+308 | 0.114577  | 1         |
| Prelid2_j5       | 0.0507183   | 0.143686  | 1.50234      | 0.318846  | 1         |
| Prelid2_j6       | 0.000377126 | 0.078192  | 7.69583      | 0.875806  | 1         |
| XLOC_015994      | 0.0558117   | 0.259714  | 2.21828      | 0.0396859 | 0.222743  |
| XLOC_015994      | 0           | 0.0835053 | 1.79769e+308 | 0.0696039 | 1         |
| XLOC_015994      | 0           | 0.248062  | 1.79769e+308 | 0.001939  | 0.0243764 |
| Jakmip2_j4       | 6.19612     | 9.05587   |              | 0 1       | 1         |
| Trim36_j6        | 4.581       | 5.26269   |              | 0 1       | 1         |
| Pggt1b_j1        | 0.0293457   | 0.210061  |              | 0 1       | 1         |
| Sema6a_j3        | 0.465943    | 1.51215   |              | 0 1       | 1         |
| Dtwd2_j2         | 0.23903     | 0.245401  | 0.0379512    | 0.955573  | 0.987197  |
| Aldh7a1_j2       | 4.96792     | 3.94686   |              | 0 1       | 1         |
| Fbn2_j2          | 0.152554    | 0.0923927 | -0.723473    | 1         | 1         |
| Fbn2_j1          | 0           | 0.116171  | 1.79769e+308 | 0.0080246 | 1         |
| Hmgxb3_j2        | 0           | 0.0816034 |              | 0 1       | 1         |
| Arhgef37_j3      | 0.500943    | 0.245749  | -1.02746     | 0.0206907 | 0.144219  |
| Arhgef37         | 0           | 0.222414  | 1.79769e+308 | 1.55E-05  | 0.0004491 |
| Arhgef37_j4      | 0.205413    | 0.16539   | -0.312663    | 0.512868  | 0.7923    |
| Grpel2_j3        | 2.21544     | 1.64689   |              | 0 1       | 1         |
| Ablim3_j1        | 3.07909     | 3.74928   |              | 0 1       | 1         |

|                  |            |            |              |           |           |
|------------------|------------|------------|--------------|-----------|-----------|
| Fbxo38_j5        | 0.0743869  | 0.193771   | 0            | 1         | 1         |
| Fam38b_j14       | 0.99489    | 0.00271311 | 0            | 1         | 1         |
| Fam38b_j13       | 2.59257    | 2.91839    | 0            | 1         | 1         |
| Atp8b1_j2        | 0.00951659 | 0.0517507  | 2.44306      | 0.295995  | 1         |
| Mc4r             | 0.347417   | 0.673783   | 0.955616     | 0.0006555 | 0.0101821 |
| Spire1_j3        | 3.86672    | 4.42882    | 0            | 1         | 1         |
| Cep76_j2         | 8.90E-05   | 0.236076   | 11.3736      | 0.833327  | 0.946329  |
| Cep76_j1         | 0.433444   | 0.156881   | -1.46618     | 0.0047073 | 0.0484846 |
| XLOC_016071      | 0.04001    | 0.118859   | 1.57082      | 0.177406  | 1         |
| Lipg_j1          | 0.0934128  | 0.177526   | 0.92634      | 0.163593  | 0.498858  |
| Gm672_j3         | 0.00159194 | 2.50406    | 0            | 1         | 1         |
| XLOC_016078      | 0.0300133  | 0.0489079  | 0.704465     | 0.677841  | 1         |
| Katnal2_j6       | 0.0335857  | 0.184696   | 2.45923      | 0.0351287 | 0.206239  |
| Katnal2_j5       | 0.0241378  | 0.0898506  | 1.89624      | 0.147469  | 1         |
| Siglec15_j1      | 0.00788282 | 0.0983225  | 3.64074      | 0.276127  | 1         |
| Adnp2_j2         | 0.570732   | 0.459234   | -0.313584    | 0.31748   | 0.660796  |
| Atp9b_j4         | 1.56974    | 1.57685    | 0            | 1         | 1         |
| Atp9b_j5         | 0.505912   | 0.338178   | 0            | 1         | 1         |
| Galr1_j1         | 0.298881   | 0.799692   | 1.41987      | 1.07E-08  | 7.48E-07  |
| Zfp236_j1        | 0.502038   | 1.01494    | 0            | 1         | 1         |
| Zfp407_j2        | 0          | 0.273082   | 1.79769e+308 | 0.0010499 | 0.0148551 |
| Mrpl21           | 1.2188     | 1.49252    | 0            | 1         | 1         |
| Cpt1a            | 3.42292    | 2.91818    | 0            | 1         | 1         |
| Cpt1a_j3         | 1.14206    | 2.63858    | 0            | 1         | 1         |
| 1810055G02Rik_j1 | 1.52764    | 1.29996    | 0            | 1         | 1         |
| 1810055G02Rik    | 3.38239    | 3.40613    | 0            | 1         | 1         |
| XLOC_016695      | 0.25088    | 0.168349   | -0.575544    | 0.476693  | 0.772259  |
| Suv420h1         | 0.0814155  | 0.107005   | 0.394299     | 0.483419  | 1         |
| Suv420h1_j2      | 0.15168    | 0.136739   | -0.149605    | 0.789312  | 0.929739  |
| Chka             | 3.79446    | 4.34639    | 0            | 1         | 1         |
| Chka_j1          | 8.02911    | 9.72459    | 0            | 1         | 1         |
| Chka_j2          | 5.62259    | 7.0059     | 0            | 1         | 1         |
| XLOC_016696      | 0.232045   | 0.238371   | 0            | 1         | 1         |
| Acy3             | 0.428548   | 0.068739   | -2.64026     | 0.0314457 | 0.191587  |
| Doc2g_j3         | 0.367969   | 0.285687   | -0.36515     | 0.357655  | 0.693512  |
| Cdk2ap2          | 5.12331    | 5.33796    | 0.0592129    | 0.734736  | 0.906438  |
| Cdk2ap2_j1       | 16.6568    | 16.779     | 0.0105456    | 0.940786  | 0.982026  |
| Pitpnm1_j2       | 4.30433    | 2.87809    | 0            | 1         | 1         |
| Coro1b_j7        | 9.84806    | 12.0224    | 0            | 1         | 1         |
| Ppp1ca           | 0.145563   | 0.188502   | 0            | 1         | 1         |
| Ppp1ca_j5        | 45.5214    | 56.5675    | 0            | 1         | 1         |
| Clcf1            | 2.66E-05   | 0.39191    | 13.8483      | 0.950339  | 0.985635  |
| Clcf1_j3         | 0.197161   | 0.0403076  | -2.29025     | 0.0472747 | 0.249594  |
| Clcf1_j6         | 0.295162   | 0.431254   | 0.547029     | 0.243135  | 0.590533  |
| Pold4            | 20.1162    | 21.684     | 0.108271     | 0.379994  | 0.711076  |
| XLOC_016711      | 0.1586     | 0.145315   | 0            | 1         | 1         |
| XLOC_016711      | 0.126898   | 0.0387676  | 0            | 1         | 1         |

|             |           |                 |             |           |           |
|-------------|-----------|-----------------|-------------|-----------|-----------|
| Pcx_j1      | 0.167151  | 0.13499         | -0.308306   | 0.420717  | 0.736893  |
| Spnb3       | 6.55821   | 5.03707         | -0.380718   | 0.0006324 | 0.009899  |
| Spnb3_j3    | 12.8632   | 14.1598         | 0.138546    | 0.118631  | 0.428668  |
| Spnb3_j4    | 0.0527704 | 0 -1.79769e+308 |             | 0.0006926 | 1         |
| Spnb3_j7    | 13.1989   | 16.3037         | 0.304782    | 0.023903  | 0.159295  |
| Rbm4b       | 2.06716   | 1.9428          | -0.0895179  | 0.674923  | 0.877505  |
| Rbm4b_j1    | 0.507536  | 0.540452        | 0.0906561   | 0.791647  | 0.930476  |
| Rbm4b_j2    | 1.7441    | 1.84323         | 0.0797577   | 0.689737  | 0.885061  |
| Ccdc87      | 0.559146  | 0.53116         | -0.0740785  | 0.771159  | 0.922274  |
| Ctsf        | 20.1284   | 17.8323         | -0.174739   | 0.0959154 | 0.382476  |
| Zdhhc24     | 3.41535   | 4.78054         | 0           | 1         | 1         |
| Zdhhc24     | 7.77529   | 7.38657         | 0           | 1         | 1         |
| Mrpl11      | 2.88306   | 2.86634         | -0.00838827 | 0.952631  | 0.986299  |
| Slc29a2     | 3.21431   | 4.96762         | 0.628043    | 6.09E-07  | 2.69E-05  |
| B3gnt1      | 28.5863   | 32.6993         | 0.193934    | 0.0286355 | 0.180049  |
| Rin1_j2     | 0.0407979 | 0.119405        | 1.5493      | 0.0716564 | 1         |
| Rin1_j1     | 0.0543362 | 0.112524        | 1.05024     | 0.184486  | 1         |
| Rin1_j7     | 0.120106  | 0.35046         | 1.54495     | 0.0082866 | 0.0745957 |
| Cd248       | 0.843388  | 1.35387         | 0.682819    | 0.0013717 | 0.0184243 |
| Gal3st3     | 1.32551   | 0.986455        | -0.426227   | 0.0806695 | 0.345729  |
| Eif1ad      | 4.41609   | 4.79834         | 0.119765    | 0.384236  | 0.71322   |
| Bles03      | 3.86806   | 3.83474         | -0.0124817  | 0.955132  | 0.987121  |
| Al837181    | 27.1411   | 27.7489         | 0.0319514   | 0.757438  | 0.916403  |
| Fosl1       | 0.153014  | 0.178406        | 0           | 1         | 1         |
| Fibp_j2     | 4.00362   | 4.07617         | 0           | 1         | 1         |
| Fibp        | 10.2692   | 9.53721         | 0           | 1         | 1         |
| Fibp_j1     | 3.01732   | 2.73384         | 0           | 1         | 1         |
| Efemp2_j2   | 0.845376  | 0.964606        | 0           | 1         | 1         |
| Efemp2_j3   | 0.301724  | 0.470452        | 0           | 1         | 1         |
| Cfl1_j1     | 444.411   | 524.72          | 0.239655    | 0.0064528 | 0.0619057 |
| Gm962       | 2.30713   | 2.22672         | -0.0511841  | 0.677777  | 0.878835  |
| XLOC_016735 | 0.0781674 | 0.0484106       | 0           | 1         | 1         |
| Rnaseh2c    | 0.554381  | 0.574499        | 0           | 1         | 1         |
| Rela        | 2.11816   | 2.66621         | 0.331976    | 0.0861993 | 0.358764  |
| Rela_j2     | 2.11064   | 1.59237         | -0.406503   | 0.116918  | 0.425121  |
| Map3k11_j3  | 5.57077   | 6.46278         | 0.214277    | 0.143543  | 0.470705  |
| Ltbp3_j1    | 0.0872185 | 0.0297697       | 0           | 1         | 1         |
| Slc25a45    | 0.496707  | 0.633305        | 0.350506    | 0.42161   | 0.737768  |
| Slc25a45    | 1.12058   | 1.40381         | 0.325103    | 0.196647  | 0.53943   |
| Batf2_j1    | 0.163894  | 0.052174        | -1.65136    | 0.215772  | 0.561549  |
| Atg2a_j6    | 1.37602   | 1.61358         | 0.229761    | 0.267077  | 0.616066  |
| Ehd1        | 15.3289   | 20.7278         | 0.435311    | 3.43E-06  | 0.0001217 |
| Cdc42bpg_j1 | 0.432475  | 0.440819        | 0.0275697   | 0.920261  | 0.975018  |
| Cdc42bpg_j4 | 0.10078   | 0.100204        | -0.00827174 | 0.98813   | 1         |
| Cdc42bpg_j5 | 0.232134  | 0.0665454       | -1.80255    | 0.0068664 | 0.0648684 |
| Cdc42bpg_j9 | 0.564076  | 0.71694         | 0.345962    | 0.302758  | 0.648644  |
| Men1        | 20.4666   | 24.75           | 0.274156    | 0.0039385 | 0.0424409 |

|               |           |                 |            |           |           |
|---------------|-----------|-----------------|------------|-----------|-----------|
| Map4k2        | 10.2765   | 8.32922         | 0          | 1         | 1         |
| Sf1           | 5.385     | 6.4117          | 0          | 1         | 1         |
| Pygm_j2       | 0.221373  | 0.0734713       | -1.59123   | 0.366283  | 0.700066  |
| Pygm_j3       | 0.382956  | 0.539096        | 0.493364   | 0.503     | 0.786906  |
| Rasgrp2_j2    | 0.383416  | 0.214591        | -0.837321  | 0.370255  | 0.703609  |
| Rasgrp2_j4    | 1.01276   | 0.635212        | -0.672988  | 0.303048  | 0.648824  |
| Rasgrp2_j6    | 3.70E-05  | 0.436005        | 13.5257    | 0.956668  | 0.987617  |
| Nrxn2_j2      | 5.79462   | 5.72089         | -0.0184735 | 0.875533  | 0.960411  |
| Nrxn2_j7      | 21.0785   | 19.3605         | -0.122656  | 0.238172  | 0.585036  |
| Nrxn2_j6      | 24.6422   | 22.9146         | -0.104864  | 0.320018  | 0.663346  |
| Ppp1r14b_j2   | 1.74722   | 2.32618         | 0.4129     | 0.025741  | 0.167714  |
| Trpt1         | 1.49879   | 1.63445         | 0.125012   | 0.555553  | 0.818323  |
| Trpt1_j1      | 0.616184  | 0.60487         | -0.0267356 | 0.937872  | 0.980993  |
| Rcor2_j1      | 1.67899   | 1.44474         | 0          | 1         | 1         |
| Pla2g16       | 10.1583   | 9.28919         | -0.12903   | 0.240949  | 0.588146  |
| Pla2g16       | 1.90587   | 2.01423         | 0.0797786  | 0.697866  | 0.888636  |
| XLOC_016767   | 12.4741   | 14.8267         | 0.24926    | 0.318683  | 0.662023  |
| XLOC_016768   | 7.38356   | 7.86648         | 0.0914021  | 0.644059  | 0.862786  |
| Wdr74_j2      | 10.4752   | 11.4609         | 0          | 1         | 1         |
| Stx5a         | 1.29521   | 0.895114        | 0          | 1         | 1         |
| Stx5a         | 3.6364    | 4.82814         | 0          | 1         | 1         |
| Nxf1_j5       | 4.34684   | 4.21729         | 0          | 1         | 1         |
| Nxf1_j4       | 0.749152  | 0.79302         | 0          | 1         | 1         |
| Zbtb3         | 0.0868398 | 0 -1.79769e+308 | 0.0046118  | 0.966298  | 0.990343  |
| Zbtb3         | 1.12521   | 1.13253         | 0.00935557 | 0.966298  | 0.990343  |
| Hnrnpul2      | 0.769437  | 1.09626         | 0          | 1         | 1         |
| Ubxn1         | 22.68     | 21.9177         | 0          | 1         | 1         |
| Ubxn1         | 54.3989   | 57.3857         | 0          | 1         | 1         |
| 1810009A15Rik | 1.66755   | 1.41031         | 0          | 1         | 1         |
| Eml3_j3       | 3.38637   | 3.22814         | 0          | 1         | 1         |
| Eef1g_j6      | 0.298292  | 0.434525        | 0.542715   | 0.0491744 | 0.255597  |
| Fth1          | 325.073   | 361.745         | 0          | 1         | 1         |
| Fth1_j5       | 150.077   | 114.977         | 0          | 1         | 1         |
| Rab3il1_j1    | 0.213674  | 0 -1.79769e+308 | 0.0006222  | 0.0006222 | 0.0097746 |
| Rab3il1_j7    | 1.605     | 0.889302        | -0.851828  | 0.0046206 | 0.0478345 |
| Rab3il1       | 0.454274  | 0.360963        | -0.331714  | 0.498211  | 0.783887  |
| Fads3_j1      | 14.0658   | 25.1766         | 0          | 1         | 1         |
| Fads1         | 46.8357   | 50.2092         | 0.100343   | 0.24668   | 0.594226  |
| 1810006K21Rik | 36.1821   | 36.3468         | 0.0065538  | 0.96514   | 0.990054  |
| Syt7_j2       | 21.3802   | 18.1608         | 0          | 1         | 1         |
| Syt7_j1       | 9.82561   | 5.99116         | 0          | 1         | 1         |
| Syt7_j4       | 7.90443   | 7.0597          | 0          | 1         | 1         |
| Cpsf7         | 0.275151  | 0.408554        | 0          | 1         | 1         |
| Cybasc3       | 1.74067   | 1.52997         | -0.186142  | 0.380482  | 0.711466  |
| Ddb1_j1       | 4.69728   | 4.40257         | -0.0934786 | 0.526637  | 0.801167  |
| Vps37c_j1     | 1.86089   | 1.85662         | -0.0033148 | 0.994695  | 0.998469  |
| Vps37c        | 6.98852   | 9.02261         | 0.368559   | 0.0540179 | 0.270834  |

|                  |           |                        |            |           |           |
|------------------|-----------|------------------------|------------|-----------|-----------|
| Prpf19_j1        | 0.505622  | 0.295972               | 0          | 1         | 1         |
| Prpf19           | 23.0176   | 20.8725                | 0          | 1         | 1         |
| Prpf19_j3        | 32.3603   | 32.8547                | 0          | 1         | 1         |
| 4930526L06Rik_j1 | 0.318643  | 0.323074               | 0.0199266  | 0.982219  | 0.994604  |
| XLOC_016800      | 0.299262  | 0.194199               | -0.623877  | 0.615826  | 0.848539  |
| Ms4a6c           | 0.19469   | 0.489631               | 1.33052    | 0.0023066 | 0.0279462 |
| Ms4a6b           | 0.43912   | 0.897491               | 1.03128    | 0.0001506 | 0.0030264 |
| Mrpl16           | 1.52131   | 1.44451                | -0.0747311 | 0.576715  | 0.829111  |
| Pat1             | 4.61309   | 4.33838                | -0.0885777 | 0.497814  | 0.783786  |
| Osbp             | 12.1974   | 11.4005                | 0          | 1         | 1         |
| Osbp_j1          | 1.30602   | 1.5589                 | 0          | 1         | 1         |
| Mpeg1_j1         | 1.35497   | 3.50267                | 1.3702     | 0         | 0         |
| Fam111a          | 2.19918   | 4.41061                | 1.00401    | 9.80E-12  | 1.20E-09  |
| Gm4952_j1        | 0.0920473 | 0 -1.79769e+308        |            | 0.01663   | 1         |
| Glyat            | 0.358022  | 0.322902               | -0.148954  | 0.727686  | 0.903503  |
| Lpxn_j2          | 0.0598164 | 0.148625               | 1.31306    | 0.255276  | 1         |
| Rmnd1            | 7.27103   | 10.6779                | 0.554389   | 1.02E-05  | 0.0003147 |
| Gnaq             | 31.8135   | 24.4442                | 0          | 1         | 1         |
| Gnaq_j4          | 18.7538   | 26.0575                | 0          | 1         | 1         |
| Prune2_j4        | 27.2482   | 18.9162                | -0.526545  | 2.14E-09  | 1.71E-07  |
| Prune2_j8        | 0.134457  | 0.675013               | 2.32777    | 2.44E-05  | 0.000649  |
| Rfk              | 17.4302   | 14.9564                | 0          | 1         | 1         |
| 2410127L17Rik    | 0.315816  | 0.217529               | -0.537877  | 0.484564  | 0.77644   |
| 2410127L17Rik_j1 | 0.28043   | 0.167012               | -0.747691  | 0.383837  | 0.71322   |
| D030056L22Rik    | 1.05059   | 1.23653                | 0          | 1         | 1         |
| D030056L22Rik    | 2.33045   | 2.09171                | 0          | 1         | 1         |
| Aldh1a1_j1       | 0.113121  | 0.189371               | 0.743349   | 0.287795  | 0.635813  |
| Aldh1a1_j4       | 0.198616  | 0.201524               | 0.0209703  | 0.974384  | 0.992657  |
| Zfand5           | 10.2981   | 6.6685                 | 0          | 1         | 1         |
| Zfand5_j2        | 0.0955076 | 0.0315863              | 0          | 1         | 1         |
| Zfand5_j3        | 17.4877   | 19.3335                | 0          | 1         | 1         |
| Zfand5_j7        | 6.80533   | 7.58494                | 0          | 1         | 1         |
| Fam108b_j3       | 3.02333   | 2.94136                | 0          | 1         | 1         |
| Tmem2            | 1.65817   | 1.4541                 | 0          | 1         | 1         |
| Trpm3_j2         | 0.367291  | 0.619961               | 0          | 1         | 1         |
| Trpm3_j1         | 0.93537   | 0.456792               | 0          | 1         | 1         |
| Trpm3_j6         | 0.652276  | 0.689904               | 0          | 1         | 1         |
| Trpm3_j8         | 1.69773   | 0.895523               | 0          | 1         | 1         |
| Klf9_j2          | 7.33021   | 12.2496                | 0          | 1         | 1         |
| Klf9             | 3.07672   | 3.03057                | 0          | 1         | 1         |
| Gm9493           | 42.5701   | 39.9424                | 0          | 1         | 1         |
| Ptar1            | 0.534693  | 0.38625                | -0.469174  | 0.0471703 | 0.249247  |
| E030010A14Rik    | 0.259334  | 0.248286               | -0.0628134 | 0.893218  | 0.966313  |
| Kank1_j3         | 0.287404  | 0.266337               | 0          | 1         | 1         |
| Smarca2          | 2.25947   | 1.50195                | -0.589151  | 0.001249  | 0.0170719 |
| Smarca2_j7       | 0         | 0.0496693 1.79769e+308 |            | 0.0571752 | 1         |
| Vldlr_j6         | 0.0808583 | 0.352189               | 0          | 1         | 1         |



|               |           |                 |            |           |           |
|---------------|-----------|-----------------|------------|-----------|-----------|
| Vldlr_j5      | 0.403907  | 0.248475        | 0          | 1         | 1         |
| Vldlr_j8      | 0.214411  | 0.0339991       | 0          | 1         | 1         |
| Slc1a1        | 1.48925   | 0.891512        | -0.740256  | 0.000858  | 0.0126499 |
| Cdc37l1       | 6.1197    | 5.27131         | 0          | 1         | 1         |
| Cdc37l1       | 3.06763   | 2.84192         | 0          | 1         | 1         |
| Rcl1          | 5.14078   | 5.92679         | 0.205263   | 0.170605  | 0.507473  |
| Jak2          | 3.34806   | 3.35611         | 0          | 1         | 1         |
| Cd274_j2      | 0.32064   | 0.501638        | 0.645689   | 0.0440835 | 0.239188  |
| C030046E11Rik | 1.06696   | 0.81117         | -0.395437  | 0.0089126 | 0.0785923 |
| Il33          | 0.207068  | 0.734366        | 1.82639    | 3.82E-05  | 0.0009496 |
| Il33_j3       | 0.105213  | 0.0694853       | -0.598534  | 0.630086  | 1         |
| Uhrf2_j1      | 0.0589109 | 0.0546304       | -0.108832  | 0.89887   | 1         |
| Uhrf2         | 1.45132   | 1.36709         | -0.0862603 | 0.651968  | 0.866535  |
| Mbl2_j1       | 0.559912  | 0.750978        | 0.423571   | 0.417384  | 0.734487  |
| Cstf2t        | 6.54408   | 6.89508         | 0.0753785  | 0.486044  | 0.777413  |
| Minpp1_j1     | 0.293838  | 0.138135        | -1.08894   | 0.0920858 | 0.373315  |
| Pten          | 0.177906  | 0.0743228       | -1.25924   | 0.0256213 | 0.167135  |
| Pten_j6       | 5.68088   | 3.688           | -0.623274  | 0.0197176 | 0.139532  |
| Pten_j8       | 0.69634   | 0.00746374      | -6.54375   | 0.176292  | 0.515018  |
| Lipk          | 0.743427  | 1.68464         | 1.18018    | 1.58E-05  | 0.0004574 |
| Lipn_j1       | 0.0419145 | 0.842004        | 0          | 1         | 1         |
| Lipn          | 0.447557  | 2.39952         | 0          | 1         | 1         |
| Stambpl1      | 4.98938   | 4.77797         | 0          | 1         | 1         |
| Stambpl1      | 0.162165  | 0.0629116       | 0          | 1         | 1         |
| Stambpl1_j2   | 0.821164  | 0.665128        | 0          | 1         | 1         |
| Fas           | 0.675944  | 0.936964        | 0.471089   | 0.145548  | 0.473492  |
| Fas_j1        | 0.219692  | 0 -1.79769e+308 | 0.0009915  | 0.0009915 | 0.0142142 |
| Ifit2         | 2.18701   | 1.9282          | 0          | 1         | 1         |
| Ifit2_j2      | 0.971259  | 0.677096        | 0          | 1         | 1         |
| Ifit2_j3      | 0.964455  | 0.0730657       | 0          | 1         | 1         |
| Ifit3_j1      | 3.0246    | 4.02132         | 0          | 1         | 1         |
| I830012O16Rik | 2.50493   | 2.78697         | 0          | 1         | 1         |
| Ifit1         | 1.32734   | 1.83584         | 0          | 1         | 1         |
| Kif20b_j1     | 0.0852723 | 0 -1.79769e+308 | 0.0005011  | 0.0005011 | 1         |
| Rpp30         | 11.3427   | 9.99238         | -0.182866  | 0.221852  | 0.569069  |
| Pcgf5_j4      | 0.0531308 | 0.0456491       | 0          | 1         | 1         |
| Pcgf5_j2      | 0.578488  | 0.55908         | 0          | 1         | 1         |
| Hectd2        | 0.445391  | 0.270535        | -0.719258  | 0.0700125 | 0.317598  |
| Hectd2        | 0.0929463 | 0.167538        | 0.850018   | 0.182063  | 0.522422  |
| Hectd2_j3     | 0.227402  | 0.032192        | -2.82047   | 0.0126973 | 0.102235  |
| Tnks2         | 9.24104   | 9.29247         | 0          | 1         | 1         |
| Btaf1         | 1.30752   | 1.19388         | 0          | 1         | 1         |
| Btaf1_j5      | 0.648654  | 0.607041        | 0          | 1         | 1         |
| March5        | 5.08547   | 4.7637          | 0          | 1         | 1         |
| Hhex          | 0.543035  | 0.704495        | 0.375544   | 0.255189  | 0.6036    |
| Hhex_j1       | 0.0871921 | 0.068635        | -0.345254  | 0.799801  | 1         |
| Exoc6         | 7.45081   | 5.82311         | 0          | 1         | 1         |

|              |           |                 |              |           |          |
|--------------|-----------|-----------------|--------------|-----------|----------|
| Cyp26c1_j1   | 0.142749  | 0.142708        | -0.000413783 | 0.999317  | 0.999645 |
| XLOC_016887  | 0.0918377 | 0.0206547       | -2.15262     | 0.382058  | 1        |
| Cyp26a1_j3   | 0.085944  | 0.20338         | 1.24271      | 0.427335  | 0.741741 |
| Tmem20       | 0.177444  | 0.32517         | 0.873831     | 0.0698756 | 0.317302 |
| Plce1_j1     | 0.0813499 | 0 -1.79769e+308 |              | 5.62E-07  | 1        |
| Plce1_j6     | 0.337539  | 0.360049        | 0.0931423    | 0.736956  | 0.907442 |
| Tbc1d12_j1   | 0.234994  | 0.0656234       | -1.84034     | 0.0309373 | 0.189724 |
| Hells        | 0.27612   | 2.16E-05        | -13.6405     | 0.93773   | 0.980993 |
| Hells_j8     | 0.0855797 | 0.0446981       | -0.937054    | 0.379642  | 1        |
| XLOC_016897  | 0.45878   | 0.287799        | -0.67274     | 0.467054  | 0.766531 |
| Entpd1       | 1.25198   | 1.12884         | 0            | 1         | 1        |
| Entpd1_j3    | 0.151773  | 0.294131        | 0            | 1         | 1        |
| Ccnj_j1      | 0.319374  | 0.231243        | -0.465835    | 0.341755  | 0.681595 |
| Ccnj         | 0.702469  | 0.619693        | -0.18088     | 0.549276  | 0.814587 |
| Ccnj_j7      | 0.462945  | 0.610341        | 0.398773     | 0.270163  | 0.619384 |
| Zfp518a      | 0.780989  | 0.338301        | 0            | 1         | 1        |
| Zfp518a_j2   | 0.998883  | 0.578666        | 0            | 1         | 1        |
| Zfp518a_j3   | 0.0875318 | 0.222871        | 0            | 1         | 1        |
| Gm9788       | 0.255986  | 0.493603        | 0.947288     | 0.0310788 | 0.190042 |
| Lcor         | 0.862308  | 0.264354        | 0            | 1         | 1        |
| Frat1        | 1.75711   | 1.72424         | -0.0272466   | 0.881842  | 0.962574 |
| Zdhhc16      | 0.47316   | 0.257651        | 0            | 1         | 1        |
| Zdhhc16_j4   | 6.09232   | 6.69764         | 0            | 1         | 1        |
| Ubttd1       | 6.05286   | 6.66861         | 0            | 1         | 1        |
| Ubttd1_j1    | 0.290066  | 0               | 0            | 1         | 1        |
| Ubttd1_j4    | 0.485271  | 0.154627        | 0            | 1         | 1        |
| Pi4k2a       | 43.7858   | 46.6382         | 0.0910509    | 0.293158  | 0.640163 |
| Marveld1     | 11.5797   | 13.4251         | 0.213334     | 0.0473939 | 0.250038 |
| Zfyve27      | 2.10594   | 3.01681         | 0            | 1         | 1        |
| Zfyve27      | 11.6618   | 12.8179         | 0            | 1         | 1        |
| Golga7b      | 18.4103   | 15.6111         | 0            | 1         | 1        |
| D19Erttd386e | 0.741492  | 0.606961        | -0.288827    | 0.224799  | 0.572013 |
| Gm6776       | 8.28963   | 7.52494         | -0.139628    | 0.365065  | 0.698907 |
| Cnm1         | 3.14865   | 1.56638         | 0            | 1         | 1        |
| Cnm1         | 4.57945   | 3.62942         | 0            | 1         | 1        |
| AK076978     | 0.540552  | 0.468217        | -0.207256    | 0.480846  | 0.774481 |
| Entpd7       | 0.927318  | 0.794896        | -0.222297    | 0.211179  | 0.555975 |
| Scd2         | 71.4165   | 15.9677         | 0            | 1         | 1        |
| Hif1an       | 7.95454   | 7.20693         | 0            | 1         | 1        |
| Pax2_j1      | 0.459247  | 0.292579        | -0.650445    | 0.0733655 | 0.326326 |
| Fam178a      | 1.0379    | 0.800366        | 0            | 1         | 1        |
| Fam178a_j3   | 0.336254  | 0.448466        | 0            | 1         | 1        |
| Lzts2        | 0.462326  | 0.44863         | -0.0433849   | 0.861152  | 0.956096 |
| Lzts2_j1     | 0.0123188 | 0.0471561       | 1.93658      | 0.0920567 | 1        |
| Sfxn3        | 18.0059   | 18.6522         | 0            | 1         | 1        |
| Kazald1_j1   | 0.550071  | 0.239687        | -1.19847     | 0.0953984 | 0.381326 |
| Kazald1_j4   | 2.63553   | 1.88334         | -0.484803    | 0.0432443 | 0.235975 |

|               |             |                 |            |           |           |
|---------------|-------------|-----------------|------------|-----------|-----------|
| XLOC_016935   | 0.556786    | 0.374389        | -0.572585  | 0.123008  | 0.436598  |
| Btrc_j2       | 0.63474     | 1.25528         | 0          | 1         | 1         |
| Dpcd          | 5.4275      | 5.47304         | 0.0120544  | 0.909266  | 0.971287  |
| Pprc1_j1      | 1.09747     | 1.12845         | 0          | 1         | 1         |
| Pprc1_j11     | 0.30391     | 0.190834        | 0          | 1         | 1         |
| Nolc1         | 4.71539     | 6.24395         | 0          | 1         | 1         |
| Nolc1         | 4.13854     | 1.95158         | 0          | 1         | 1         |
| Gbf1_j1       | 17.2322     | 13.6004         | -0.341459  | 0.0002339 | 0.0043617 |
| Gbf1_j2       | 0.783514    | 1.57723         | 1.00936    | 1.72E-05  | 0.0004901 |
| Gbf1_j3       | 0.763171    | 0.708832        | -0.106563  | 0.712921  | 0.896075  |
| Gbf1_j6       | 6.75531     | 8.12643         | 0.2666     | 0.120344  | 0.43198   |
| Nfkb2         | 0.479953    | 0.52161         | 0.120076   | 0.683797  | 0.881734  |
| Sufu          | 1.36822     | 1.36676         | 0          | 1         | 1         |
| Sufu          | 0.581204    | 0.484557        | 0          | 1         | 1         |
| Trim8         | 7.8209      | 7.97542         | 0.0282265  | 0.799919  | 0.933188  |
| Trim8_j3      | 1.61264     | 0.724151        | -1.15506   | 0.0778632 | 0.337832  |
| Sfxn2_j1      | 0.135702    | 0.124838        | -0.120385  | 0.855477  | 1         |
| D19Wsu162e    | 2.51777     | 2.77174         | 0          | 1         | 1         |
| D19Wsu162e    | 3.18444     | 3.30805         | 0          | 1         | 1         |
| 2010012O05Rik | 5.49527     | 5.73957         | 0.0627507  | 0.668947  | 0.874746  |
| As3mt         | 4.21412     | 4.47916         | 0.0879959  | 0.585452  | 0.833935  |
| XLOC_016954   | 0.167473    | 0.140572        | 0          | 1         | 1         |
| Ina           | 10.4806     | 11.1836         | 0          | 1         | 1         |
| Taf5          | 0.715886    | 0.759425        | 0          | 1         | 1         |
| Pdcd11_j1     | 1.509       | 1.51775         | 0          | 1         | 1         |
| Neur1a        | 5.24441     | 4.95089         | 0          | 1         | 1         |
| Slk           | 7.28164     | 6.94422         | 0          | 1         | 1         |
| Slk_j2        | 0.450534    | 0.494123        | 0          | 1         | 1         |
| Slk_j4        | 4.07971     | 2.58753         | 0          | 1         | 1         |
| 6330577E15Rik | 25.4462     | 26.7483         | 0          | 1         | 1         |
| Gsto1         | 11.0881     | 10.5877         | -0.0666264 | 0.639345  | 0.860439  |
| Ccdc147_j4    | 0.24273     | 0.212913        | -0.189089  | 0.784948  | 0.927761  |
| Ccdc147_j6    | 0.000452891 | 0.34281         | 9.56403    | 0.716999  | 0.897819  |
| Sorcs3        | 3.56141     | 3.34403         | -0.090862  | 0.441577  | 0.750262  |
| Add3          | 4.25171     | 4.04646         | -0.0713844 | 0.690791  | 0.885505  |
| Add3_j2       | 0.497831    | 0 -1.79769e+308 |            | 1.50E-07  | 7.67E-06  |
| Mxi1          | 1.60551     | 1.16778         | 0          | 1         | 1         |
| Mxi1          | 2.9497      | 2.75607         | 0          | 1         | 1         |
| Mxi1          | 3.79362     | 2.82971         | 0          | 1         | 1         |
| Dusp5         | 1.91231     | 1.14866         | 0          | 1         | 1         |
| Dusp5_j3      | 2.75695     | 1.62174         | 0          | 1         | 1         |
| XLOC_016971   | 0.120627    | 0.0904728       | -0.414993  | 0.765203  | 1         |
| Smc3          | 5.79564     | 5.49439         | -0.0770083 | 0.461335  | 0.762597  |
| Pdcd4         | 1.12885     | 0.981264        | -0.202137  | 0.203943  | 0.548098  |
| Shoc2_j1      | 0.727538    | 0.92477         | 0.346072   | 0.185041  | 0.525183  |
| Shoc2         | 1.32298     | 1.06411         | -0.314139  | 0.171171  | 0.507955  |
| XLOC_016974   | 0.0673838   | 0.0426832       | -0.658735  | 0.65146   | 1         |

|               |           |                 |            |           |           |
|---------------|-----------|-----------------|------------|-----------|-----------|
| Adra2a_j1     | 0.254666  | 0.54421         | 1.09556    | 0.0028079 | 0.0326714 |
| Adra2a        | 0.798796  | 0.718691        | -0.152454  | 0.564009  | 0.8231    |
| Acs15         | 3.26712   | 3.46932         | 0.0866332  | 0.434522  | 0.745636  |
| Vti1a         | 1.79633   | 1.61228         | 0          | 1         | 1         |
| Tcf7l2_j2     | 0.104387  | 0 -1.79769e+308 |            | 0.0004313 | 1         |
| Tcf7l2_j1     | 0.267126  | 0.107087        | -1.31874   | 0.0322342 | 0.19476   |
| Casp7         | 0.951166  | 1.17194         | 0.301127   | 0.172676  | 0.510176  |
| Nhlrc2_j1     | 0.320122  | 0.121893        | -1.39301   | 0.0014764 | 0.0194859 |
| Nhlrc2        | 1.31399   | 1.46285         | 0.154824   | 0.306337  | 0.651661  |
| Fam160b1      | 4.68391   | 4.36479         | 0          | 1         | 1         |
| Trub1         | 3.53813   | 3.23481         | -0.129305  | 0.356429  | 0.692355  |
| AK040090_j2   | 1.59895   | 0.838691        | -0.93091   | 0.0073105 | 0.0680869 |
| Atrnl1        | 21.1002   | 18.6821         | 0          | 1         | 1         |
| Atrnl1_j2     | 40.0745   | 41.9065         | 0          | 1         | 1         |
| 1700011F14Rik | 0.545259  | 0.346584        | -0.653736  | 0.0272289 | 0.174377  |
| Pnliprp2_j2   | 0.0502637 | 0 -1.79769e+308 |            | 0.0604611 | 1         |
| Eno4_j1       | 0.0894936 | 0.0128109       | -2.80441   | 0.396523  | 1         |
| Eno4_j2       | 0.116269  | 0.0693279       | -0.745955  | 0.42501   | 1         |
| Eno4_j3       | 0.288445  | 0.103988        | -1.47188   | 0.169071  | 0.505812  |
| XLOC_016995   | 1.19893   | 1.47295         | 0.29696    | 0.609839  | 0.846292  |
| Kcnk18        | 2.53903   | 1.68312         | -0.593141  | 4.24E-06  | 0.0001462 |
| Nanos1        | 1.3303    | 1.16763         | -0.188165  | 0.302322  | 0.648402  |
| Fam45a        | 0.111771  | 0.122585        | 0.133241   | 0.82514   | 1         |
| Fam45a_j2     | 1.90943   | 1.56902         | -0.283279  | 0.112449  | 0.41729   |
| Grk5          | 2.44409   | 2.33982         | -0.0628959 | 0.597323  | 0.84027   |
| Ighmbp2       | 1.6479    | 1.35033         | 0          | 1         | 1         |
| Gal           | 28.1204   | 132.24          | 2.23347    | 0         | 0         |
| Ppp6r3_j1     | 6.06052   | 5.88665         | 0          | 1         | 1         |
| Ppp6r3_j7     | 0.346217  | 0.375799        | 0          | 1         | 1         |
| Ppp6r3        | 3.14607   | 2.82743         | 0          | 1         | 1         |
| Lrp5_j2       | 1.10696   | 1.37344         | 0          | 1         | 1         |
| Lrp5          | 1.05107   | 0.702163        | 0          | 1         | 1         |
| AK144662      | 0.671596  | 0.713342        | 0.0870012  | 0.842901  | 0.950302  |
| XLOC_017008   | 0.199533  | 0.18632         | 0          | 1         | 1         |
| Tcirg1_j1     | 3.02414   | 3.10779         | 0          | 1         | 1         |
| Tcirg1        | 0.131319  | 0.267026        | 0          | 1         | 1         |
| Ndufs8        | 24.151    | 21.8061         | 0          | 1         | 1         |
| Ndufs8        | 10.6982   | 10.903          | 0          | 1         | 1         |
| Aldh3b1       | 2.27628   | 2.10865         | -0.110357  | 0.635735  | 0.85878   |
| Aldh3b1_j1    | 1.91346   | 2.46256         | 0.363978   | 0.130905  | 0.45048   |
| Aip           | 42.5817   | 41.423          | 0          | 1         | 1         |
| Rps6kb2       | 6.95081   | 8.13648         | 0          | 1         | 1         |
| Carns1_j1     | 4.49642   | 5.01317         | 0.156947   | 0.328327  | 0.670862  |
| Carns1_j5     | 0.421722  | 0.094251        | -2.16171   | 0.0011526 | 0.0160111 |
| Carns1_j4     | 1.11206   | 0.55137         | -1.01214   | 0.0008505 | 0.0125592 |
| Tbc1d10c_j1   | 0.118432  | 0.00146041      | 0          | 1         | 1         |
| Tbc1d10c_j3   | 0.0681614 | 0               | 0          | 1         | 1         |

|               |           |           |               |           |           |
|---------------|-----------|-----------|---------------|-----------|-----------|
| Ankrd13d_j9   | 0.86727   | 0.427368  | 0             | 1         | 1         |
| Ankrd13d_j8   | 0.574253  | 0.54505   | 0             | 1         | 1         |
| Ankrd13d_j10  | 0.30709   | 0.239735  | 0             | 1         | 1         |
| Adrbk1_j2     | 0.435765  | 0         | 0             | 1         | 1         |
| Adrbk1_j1     | 15.3709   | 17.3016   | 0             | 1         | 1         |
| Adrbk1        | 61.987    | 57.5453   | 0             | 1         | 1         |
| Kdm2a_j2      | 7.80378   | 8.68109   | 0             | 1         | 1         |
| Kdm2a_j3      | 4.11342   | 3.93201   | 0             | 1         | 1         |
| Kdm2a         | 3.13964   | 2.86706   | 0             | 1         | 1         |
| Rhod          | 0.346441  | 0.517327  | 0.578467      | 0.214293  | 0.559699  |
| Rhod          | 0.342726  | 0.0920991 | -1.8958       | 0.133272  | 0.454235  |
| Syt12         | 3.09605   | 3.60085   | 0.217908      | 0.110379  | 0.413453  |
| 2010003K11Rik | 0.230314  | 0.310367  | 0.430376      | 0.355062  | 0.691033  |
| Lrfn4_j1      | 11.3096   | 12.5108   | 0.14562       | 0.217957  | 0.564217  |
| Rbm4_j1       | 0.311813  | 0.337025  | 0             | 1         | 1         |
| Rbm14         | 1.73342   | 1.81119   | 0             | 1         | 1         |
| Ccs           | 11.8612   | 12.3313   | 0.0560746     | 0.679736  | 0.879568  |
| Bbs1_j1       | 0.185776  | 0.0506854 | 0             | 1         | 1         |
| Dpp3_j3       | 11.4584   | 14.2282   | 0             | 1         | 1         |
| Dpp3          | 23.0533   | 26.9659   | 0             | 1         | 1         |
| Peli3         | 10.7644   | 8.05872   | -0.417647     | 0.0001076 | 0.0022916 |
| Tmem151a_j2   | 0.524524  | 0         | -1.79769e+308 | 1.91E-08  | 1.27E-06  |
| Klc2_j1       | 0.165412  | 0.31043   | 0.908207      | 0.0204881 | 0.143254  |
| Pacs1_j1      | 1.34723   | 0.77713   | -0.793765     | 0.0367632 | 0.212054  |
| Pacs1         | 6.41162   | 6.71848   | 0.0674467     | 0.552426  | 0.816549  |
| Sf3b2_j4      | 0.192598  | 0.0874233 | 0             | 1         | 1         |
| Sf3b2_j5      | 25.9779   | 27.5707   | 0             | 1         | 1         |
| Cst6          | 13.0805   | 11.3139   | -0.209324     | 0.147784  | 0.476408  |
| Banf1         | 2.17456   | 1.56079   | -0.478446     | 0.333942  | 0.674849  |
| Banf1         | 3.36254   | 4.07366   | 0.276777      | 0.0288218 | 0.18076   |
| Sart1         | 6.28297   | 6.51743   | 0.052858      | 0.624417  | 0.853355  |
| Drap1         | 42.2145   | 45.4871   | 0.107718      | 0.288259  | 0.636106  |
| Ccdc85b_j1    | 21.6555   | 21.9073   | 0             | 1         | 1         |
| Snx32_j2      | 0.196347  | 0.15935   | -0.301202     | 0.567193  | 0.82484   |
| Kat5          | 12.5123   | 12.6502   | 0             | 1         | 1         |
| Kat5_j3       | 0.100034  | 0         | 0             | 1         | 1         |
| Sipa1         | 0.0767476 | 0.11186   | 0.543501      | 0.459332  | 1         |
| Pcnx13_j9     | 0.282163  | 0.0978584 | -1.52776      | 0.0133973 | 0.106204  |
| Ehbp1l1_j3    | 1.8761    | 2.12699   | 0             | 1         | 1         |
| Ehbp1l1_j2    | 2.0612    | 0.99525   | 0             | 1         | 1         |
| Ehbp1l1       | 1.37729   | 1.49131   | 0             | 1         | 1         |
| Sssca1        | 33.1427   | 35.5256   | 0             | 1         | 1         |
| Scyl1_j6      | 1.02532   | 0.871399  | 0             | 1         | 1         |
| Scyl1         | 3.6289    | 3.39468   | 0             | 1         | 1         |
| AK197973      | 1.62774   | 0.558257  | 0             | 1         | 1         |
| Frmd8_j1      | 1.49535   | 3.40081   | 1.18539       | 2.65E-05  | 0.0006966 |
| Frmd8         | 9.28224   | 10.7279   | 0.208823      | 0.0684708 | 0.313423  |

|                  |            |                 |            |           |           |
|------------------|------------|-----------------|------------|-----------|-----------|
| Tigd3            | 0.146953   | 0.000273218     | -9.07109   | 0.807333  | 0.936475  |
| Tigd3            | 0.13951    | 0.217282        | 0.639203   | 0.318638  | 0.662019  |
| Dpf2_j2          | 28.9421    | 28.5608         | -0.0191312 | 0.843729  | 0.950584  |
| Cdc42ep2         | 19.1708    | 22.9378         | 0.258815   | 0.0199032 | 0.140336  |
| Pola2_j2         | 0.873479   | 0.89572         | 0          | 1         | 1         |
| Pola2            | 1.31734    | 1.41206         | 0          | 1         | 1         |
| Pola2            | 0.937905   | 0.975799        | 0          | 1         | 1         |
| Capn1            | 36.2575    | 31.7237         | 0          | 1         | 1         |
| Mrpl49_j1        | 3.14377    | 3.67673         | 0          | 1         | 1         |
| Mrpl49           | 7.3292     | 7.56239         | 0          | 1         | 1         |
| 1110014N23Rik_j2 | 7.28121    | 7.88333         | 0          | 1         | 1         |
| Zfpl1_j1         | 6.98028    | 8.34992         | 0          | 1         | 1         |
| Zfpl1            | 5.42534    | 4.70344         | 0          | 1         | 1         |
| Sac3d1           | 4.5034     | 5.18932         | 0.204529   | 0.200934  | 0.544315  |
| Snx15            | 0.144451   | 0.606862        | 0          | 1         | 1         |
| Arl2             | 13.1365    | 13.7931         | 0          | 1         | 1         |
| Ppp2r5b_j3       | 17.7497    | 35.6095         | 0          | 1         | 1         |
| Ppp2r5b          | 58.3812    | 63.5244         | 0          | 1         | 1         |
| Gm14966          | 0.0650021  | 0.0204404       | 0          | 1         | 1         |
| Rps6ka4          | 7.06626    | 6.54188         | 0          | 1         | 1         |
| Esrra_j2         | 0.104095   | 0 -1.79769e+308 | 0.0077709  |           | 1         |
| Kcnk4_j2         | 0.00021452 | 0.173547        | 0          | 1         | 1         |
| Kcnk4_j5         | 0.0358051  | 0.0769183       | 0          | 1         | 1         |
| Plcb3_j5         | 8.22595    | 3.83421         | -1.10126   | 0         | 0         |
| Plcb3_j6         | 1.31314    | 0 -1.79769e+308 | 3.55E-35   | 1.22E-32  |           |
| Plcb3_j13        | 0.496507   | 0.218254        | -1.18581   | 0.0094775 | 0.0823079 |
| Fkbp2_j3         | 16.5297    | 18.2402         | 0.142064   | 0.562768  | 0.822297  |
| Fkbp2            | 22.1869    | 23.4477         | 0.0797367  | 0.602054  | 0.842577  |
| Vegfb_j2         | 0.415271   | 0.553728        | 0.415127   | 0.530695  | 0.80314   |
| Vegfb_j4         | 3.16427    | 2.48818         | -0.346782  | 0.0958292 | 0.382258  |
| Vegfb_j6         | 4.95899    | 4.87018         | -0.0260719 | 0.846754  | 0.951509  |
| Stip1            | 90.546     | 88.1492         | -0.0387032 | 0.651098  | 0.866086  |
| Flrt1_j2         | 1.80539    | 1.56835         | -0.203062  | 0.103259  | 0.398343  |
| Otub1_j1         | 0.483267   | 0.332076        | -0.541307  | 0.166061  | 0.502787  |
| Otub1            | 0.116057   | 0.0832665       | -0.479029  | 0.372226  | 1         |
| Cox8a_j1         | 361.222    | 390.077         | 0.110874   | 0.222073  | 0.569289  |
| Naa40_j1         | 7.32207    | 9.45243         | 0.368434   | 0.0233268 | 0.156583  |
| Mark2_j2         | 2.50505    | 2.03207         | 0          | 1         | 1         |
| Mark2            | 0.447148   | 0.308833        | 0          | 1         | 1         |
| Al846148_j1      | 1.69748    | 2.69748         | 0.668219   | 0.0015973 | 0.0208062 |
| Al846148         | 5.13792    | 5.33903         | 0.0553952  | 0.675304  | 0.877609  |
| Rtn3             | 393.903    | 346.918         | 0          | 1         | 1         |
| Slc3a2           | 39.9627    | 45.4017         | 0          | 1         | 1         |
| Taf6l_j1         | 3.19139    | 3.24468         | 0          | 1         | 1         |
| Polr2g           | 9.93274    | 5.40585         | 0          | 1         | 1         |
| Ttc9c            | 0.492218   | 0.430775        | 0          | 1         | 1         |
| Gng3_j3          | 137.296    | 136.34          | 0          | 1         | 1         |

|               |          |           |            |           |           |
|---------------|----------|-----------|------------|-----------|-----------|
| Gng3_j4       | 171.385  | 228.26    | 0          | 1         | 1         |
| Al462493      | 20.4092  | 21.311    | 0.062375   | 0.6363    | 0.859038  |
| Scgb1a1       | 0.535178 | 0.737225  | 0.462086   | 0.218429  | 0.564838  |
| Asrgl1        | 10.6953  | 9.46536   | -0.176243  | 0.0815186 | 0.347839  |
| Stxbp3b       | 1.12067  | 0.709707  | -0.659066  | 0.23203   | 0.579022  |
| Incenp_j3     | 1.49219  | 1.21795   | 0          | 1         | 1         |
| Incenp_j4     | 0.354831 | 0.328118  | 0          | 1         | 1         |
| Incenp_j1     | 0.654618 | 0.737206  | 0          | 1         | 1         |
| Best1_j3      | 0.4408   | 0.559826  | 0          | 1         | 1         |
| Fads2         | 7.8118   | 8.19873   | 0          | 1         | 1         |
| Fen1          | 4.31185  | 4.47166   | 0.0525032  | 0.734885  | 0.906496  |
| Gm98_j6       | 0.340737 | 0         | 0          | 1         | 1         |
| Gm98_j4       | 0.336335 | 0         | 0          | 1         | 1         |
| Dagla_j2      | 1.22869  | 1.74048   | 0          | 1         | 1         |
| Dagla         | 3.79063  | 3.03957   | 0          | 1         | 1         |
| Sdhaf2        | 2.81811  | 2.58057   | 0          | 1         | 1         |
| Tmem216_j3    | 0.506334 | 0.328033  | -0.626251  | 0.439835  | 0.749306  |
| Tmem216_j1    | 1.72816  | 0.591796  | -1.54606   | 0.0036687 | 0.0404003 |
| Dak_j2        | 1.93457  | 2.17336   | 0          | 1         | 1         |
| Dak_j3        | 1.49116  | 1.48186   | 0          | 1         | 1         |
| Tmem132a_j3   | 0.461681 | 0         | 0          | 1         | 1         |
| Tmem132a      | 2.40081  | 2.59814   | 0          | 1         | 1         |
| Tmem109       | 25.2613  | 26.5772   | 0.0732621  | 0.446749  | 0.75351   |
| Ccdc86        | 4.14837  | 5.29438   | 0.351916   | 0.0141614 | 0.110364  |
| AW112010      | 1.68745  | 2.54648   | 0.593662   | 0.026048  | 0.169217  |
| Ms4a7         | 0.916503 | 2.66267   | 1.53866    | 3.66E-10  | 3.30E-08  |
| Ms4a6d        | 0.599318 | 1.45576   | 1.28038    | 7.61E-06  | 0.0002444 |
| Ms4a3_j2      | 4.35909  | 3.77324   | -0.208223  | 0.316064  | 0.659956  |
| Ms4a3_j1      | 0.445844 | 0.608158  | 0.447906   | 0.496603  | 0.783429  |
| Stx3_j3       | 0.527146 | 0.48183   | -0.129679  | 0.557075  | 0.819382  |
| Dtx4_j2       | 1.05245  | 1.2226    | 0          | 1         | 1         |
| Dtx4          | 0.962822 | 0.842805  | 0          | 1         | 1         |
| Dtx4_j3       | 1.55494  | 1.93957   | 0          | 1         | 1         |
| A330040F15Rik | 0.21356  | 0.179631  | -0.249606  | 0.691934  | 0.885946  |
| Zfp91         | 10.9191  | 8.6428    | 0          | 1         | 1         |
| Tle4_j3       | 0.297349 | 0.0816973 | 0          | 1         | 1         |
| Tle4          | 4.648    | 3.67636   | 0          | 1         | 1         |
| Psat1         | 17.2448  | 20.5199   | 0.25086    | 0.0129067 | 0.103541  |
| Cep78         | 0.61007  | 0.65271   | 0.0974675  | 0.742405  | 0.909901  |
| Cep78_j2      | 2.3917   | 2.33003   | -0.0376879 | 0.860708  | 0.955865  |
| Vps13a        | 1.44844  | 1.16434   | -0.314986  | 0.0369318 | 0.212725  |
| XLOC_017144   | 0.13413  | 0.0433691 | -1.62889   | 0.100148  | 1         |
| Pcsk5         | 1.7147   | 1.58686   | -0.11178   | 0.485019  | 0.776871  |
| Ostf1_j6      | 26.2308  | 29.1727   | 0          | 1         | 1         |
| Ostf1         | 0.086304 | 0.0659151 | 0          | 1         | 1         |
| Anxa1_j2      | 1.74215  | 5.76421   | 0          | 1         | 1         |
| Anxa1         | 1.96314  | 6.0569    | 0          | 1         | 1         |

|                  |           |           |            |           |           |
|------------------|-----------|-----------|------------|-----------|-----------|
| Aldh1a7          | 3.27867   | 2.68032   | -0.290707  | 0.0931948 | 0.375655  |
| Tmc1             | 0.163397  | 0.10175   | -0.683345  | 0.512279  | 0.792044  |
| Gda_j1           | 1.58715   | 2.08465   | 0          | 1         | 1         |
| Gda              | 6.16971   | 5.71008   | 0          | 1         | 1         |
| 1110059E24Rik_j1 | 8.16151   | 7.84228   | 0          | 1         | 1         |
| Smc5_j1          | 1.23081   | 1.20111   | 0          | 1         | 1         |
| Smc5             | 1.11216   | 1.09893   | 0          | 1         | 1         |
| Smc5_j2          | 1.05126   | 1.41009   | 0          | 1         | 1         |
| Mamdc2           | 1.28986   | 1.90051   | 0.559169   | 0.0064047 | 0.061569  |
| Fam189a2         | 11.9896   | 9.03656   | 0          | 1         | 1         |
| Tjp2             | 0.525151  | 0.106523  | -2.30157   | 5.80E-05  | 0.0013526 |
| Tjp2_j3          | 0.329231  | 0.594129  | 0.851675   | 0.0070382 | 0.0661455 |
| Fxn              | 0.679755  | 0.659175  | -0.0443532 | 0.86842   | 0.95827   |
| Pip5k1b_j1       | 0.317469  | 0.0353558 | -3.1666    | 0.0255551 | 0.166815  |
| Pip5k1b          | 1.29658   | 0.92178   | -0.492222  | 0.0658596 | 0.306228  |
| Cbwd1            | 2.29043   | 2.41537   | 0.0766238  | 0.723801  | 0.9017    |
| Cbwd1            | 4.17411   | 3.72877   | -0.162768  | 0.347761  | 0.686337  |
| D19Bwg1357e      | 10.7481   | 11.224    | 0.0625041  | 0.550362  | 0.815351  |
| Glis3_j3         | 0.265001  | 0.410164  | 0.630205   | 0.0784322 | 0.339575  |
| Gm6788           | 85.1851   | 110.451   | 0.374728   | 7.97E-05  | 0.0017712 |
| 4430402I18Rik    | 0.294298  | 0.163137  | -0.851193  | 0.0650906 | 0.303812  |
| Ak3              | 4.42985   | 3.9436    | 0          | 1         | 1         |
| Insl6            | 0.826674  | 0.667193  | -0.309215  | 0.281779  | 0.630345  |
| 5033414D02Rik_j5 | 0.553906  | 0.435205  | -0.347948  | 0.372744  | 0.705702  |
| A930007I19Rik_j1 | 0.133379  | 0.166447  | 0.319531   | 0.657389  | 0.869442  |
| 9930021J03Rik_j3 | 2.82773   | 2.62171   | 0          | 1         | 1         |
| 9930021J03Rik_j9 | 0.370444  | 0.37571   | 0          | 1         | 1         |
| Ranbp6           | 2.76921   | 2.2835    | 0          | 1         | 1         |
| Gldc_j2          | 0.399704  | 0.440089  | 0.138862   | 0.80213   | 0.934265  |
| Gldc             | 0.30385   | 0.453588  | 0.578023   | 0.0961779 | 0.382865  |
| Prkg1_j2         | 0.317904  | 0.29212   | -0.12203   | 0.86144   | 0.956177  |
| Prkg1_j5         | 3.19003   | 2.40225   | -0.409183  | 0.128488  | 0.446769  |
| Asah2_j2         | 1.50314   | 0.693947  | -1.11508   | 1.28E-05  | 0.0003822 |
| Asah2            | 1.95552   | 0.7427    | -1.3967    | 6.00E-09  | 4.39E-07  |
| Asah2            | 0.124818  | 0.044137  | -1.49976   | 0.0990285 | 1         |
| Sgms1_j3         | 0.0564772 | 0.0234766 | 0          | 1         | 1         |
| Sgms1            | 2.2725    | 1.73569   | 0          | 1         | 1         |
| Atad1            | 8.15042   | 6.61992   | -0.300062  | 0.0188314 | 0.135304  |
| Atad1_j1         | 29.9288   | 29.3795   | -0.0267256 | 0.779828  | 0.925661  |
| Rnls_j1          | 0.294383  | 0.24703   | -0.253008  | 0.659459  | 0.870731  |
| Rnls             | 0.283316  | 0.311848  | 0.138428   | 0.779213  | 0.925601  |
| Lipo2_j2         | 0.217429  | 0.277349  | 0.351157   | 0.562846  | 0.822297  |
| Acta2            | 1.1782    | 2.32557   | 0.980997   | 6.13E-06  | 0.0002021 |
| Lipa             | 22.196    | 18.1243   | 0          | 1         | 1         |
| Slc16a12_j2      | 3.29302   | 2.39638   | -0.458554  | 0.0002998 | 0.0053415 |
| Pank1_j1         | 0.282446  | 0.136486  | -1.04922   | 0.0262224 | 0.169964  |
| Pank1            | 0.610085  | 0.412813  | -0.563522  | 0.0226458 | 0.153585  |



|                  |           |           |              |           |           |
|------------------|-----------|-----------|--------------|-----------|-----------|
| Htr7_j1          | 1.26036   | 0.781641  | 0            | 1         | 1         |
| Htr7_j5          | 0.471011  | 0.316707  | 0            | 1         | 1         |
| Htr7_j3          | 0.677463  | 0.316305  | 0            | 1         | 1         |
| Htr7_j7          | 1.56683   | 0.761059  | 0            | 1         | 1         |
| Ppp1r3c          | 0.598065  | 0.245508  | -1.28453     | 0.0030807 | 0.0351734 |
| Cpeb3            | 0.734116  | 0.9603    | 0            | 1         | 1         |
| Ide_j6           | 1.47568   | 0.816195  | 0            | 1         | 1         |
| Myof_j1          | 0.0891534 | 0.193498  | 1.11796      | 0.150886  | 0.481595  |
| 5730455O13Rik_j5 | 2.71701   | 3.27169   | 0            | 1         | 1         |
| 5730455O13Rik    | 2.11292   | 2.20218   | 0            | 1         | 1         |
| Noc3l            | 1.17732   | 0.793652  | -0.568933    | 0.0359224 | 0.20911   |
| Pdlim1           | 3.99161   | 4.06014   | 0.0245573    | 0.940183  | 0.981805  |
| Pdlim1_j3        | 3.16833   | 5.16395   | 0.704751     | 0.0507601 | 0.260916  |
| Sorbs1_j12       | 0.190277  | 0.198038  | 0            | 1         | 1         |
| Sorbs1_j15       | 0.412553  | 0         | 0            | 1         | 1         |
| Aldh18a1_j1      | 0.478998  | 0.522785  | 0            | 1         | 1         |
| Aldh18a1         | 4.84097   | 5.08727   | 0            | 1         | 1         |
| Tctn3_j1         | 0.757566  | 0.454152  | -0.738196    | 0.0156118 | 0.118147  |
| Tctn3            | 1.15037   | 1.261     | 0.132477     | 0.468769  | 0.767193  |
| Tm9sf3           | 29.3795   | 21.671    | 0            | 1         | 1         |
| Slit1_j4         | 8.76226   | 11.1271   | 0            | 1         | 1         |
| Slit1_j5         | 0.380368  | 0.494364  | 0            | 1         | 1         |
| Slit1_j6         | 13.3547   | 12.337    | 0            | 1         | 1         |
| Slit1_j7         | 0.406457  | 1.26316   | 0            | 1         | 1         |
| Arhgap19_j2      | 0.999468  | 1.43353   | 0            | 1         | 1         |
| Arhgap19         | 0.708323  | 0.284705  | 0            | 1         | 1         |
| Frat2            | 2.11578   | 2.19328   | 0.051901     | 0.77272   | 0.922935  |
| Rrp12_j1         | 5.98522   | 6.3371    | 0.0824183    | 0.410342  | 0.730298  |
| Exosc1           | 7.24405   | 6.0357    | 0            | 1         | 1         |
| Mms19_j1         | 0.400433  | 0.495809  | 0            | 1         | 1         |
| Morn4            | 27.1399   | 29.5528   | 0.122883     | 0.193363  | 0.535696  |
| Avpi1_j1         | 3.91376   | 3.91682   | 0            | 1         | 1         |
| Avpi1            | 4.26408   | 6.33087   | 0            | 1         | 1         |
| Sfrp5_j2         | 0.838787  | 0.468027  | -0.841713    | 0.158102  | 0.49232   |
| Sfrp5            | 37.5429   | 32.9613   | -0.187766    | 0.047572  | 0.250447  |
| Crtac1           | 12.1565   | 15.346    | 0            | 1         | 1         |
| Loxl4            | 0.649551  | 0.340806  | -0.930491    | 0.0021889 | 0.0267861 |
| Loxl4            | 0         | 0.0893823 | 1.79769e+308 | 0.0010344 | 1         |
| Pyroxd2_j7       | 0.0558382 | 0.143671  | 1.36345      | 0.0717071 | 1         |
| Pyroxd2_j9       | 0.144835  | 0.0806507 | -0.844655    | 0.466694  | 0.766302  |
| Hps1_j5          | 0.228275  | 0.0672306 | -1.76358     | 0.0679061 | 0.311963  |
| Hps1_j6          | 0.150597  | 0.0600408 | -1.32668     | 0.18976   | 0.531612  |
| Hps1_j2          | 0.643883  | 0.371364  | -0.793964    | 0.0093866 | 0.0817664 |
| Got1             | 103.871   | 88.8931   | -0.224655    | 0.0088808 | 0.0783971 |
| Slc25a28         | 5.12982   | 5.01387   | -0.0329852   | 0.859321  | 0.955525  |
| Cox15            | 5.47402   | 5.08956   | -0.105062    | 0.301363  | 0.647692  |
| Dnmbp            | 0.358585  | 0.400978  | 0.161209     | 0.675558  | 0.87773   |

|                  |           |                 |            |           |          |
|------------------|-----------|-----------------|------------|-----------|----------|
| Dnmbp_j1         | 0.80248   | 0.568953        | -0.496155  | 0.043395  | 0.236471 |
| Cpn1             | 1.33085   | 1.13282         | -0.232423  | 0.294489  | 0.641226 |
| Erlin1_j2        | 0.70071   | 8.57E-05        | 0          | 1         | 1        |
| Erlin1           | 4.88691   | 4.88876         | 0          | 1         | 1        |
| Chuk             | 4.91002   | 4.82542         | -0.025076  | 0.855904  | 0.95442  |
| Cwf19l1          | 0.392145  | 0.385749        | 0          | 1         | 1        |
| Bloc1s2_j3       | 1.11876   | 2.46446         | 0          | 1         | 1        |
| XLOC_017240      | 0.0756727 | 0.089592        | 0          | 1         | 1        |
| Scd1_j5          | 1.1348    | 0.00420364      | 0          | 1         | 1        |
| Scd1             | 124.922   | 102.247         | 0          | 1         | 1        |
| Scd1_j3          | 0.882255  | 1.21755         | 0          | 1         | 1        |
| Sec31b_j5        | 0.221014  | 0 -1.79769e+308 |            | 1.51E-07  | 7.71E-06 |
| Sec31b_j6        | 0.111913  | 0.0305479       | -1.87323   | 0.0934997 | 1        |
| Sec31b_j10       | 0.105165  | 0.101112        | -0.0566955 | 0.947228  | 1        |
| Ndufb8_j4        | 53.6108   | 71.2064         | 0          | 1         | 1        |
| Ndufb8           | 0.253922  | 0.188621        | 0          | 1         | 1        |
| Mrpl43           | 4.32351   | 4.34976         | 0.00873564 | 0.946264  | 0.983984 |
| Pdzd7_j1         | 0.349715  | 0.392971        | 0.168246   | 0.645883  | 0.863424 |
| Pdzd7_j4         | 0.14511   | 0.0187286       | -2.95383   | 0.320365  | 0.66367  |
| Poll_j1          | 5.10002   | 4.4974          | -0.181411  | 0.222593  | 0.569566 |
| Fbxw4            | 0.560871  | 0.422161        | -0.409875  | 0.145957  | 0.474022 |
| Npm3_j1          | 0.0980045 | 0.0518855       | 0          | 1         | 1        |
| Mgea5_j5         | 0.514575  | 0.410641        | 0          | 1         | 1        |
| Kcnp2            | 37.4009   | 26.9456         | 0          | 1         | 1        |
| 9130011E15Rik    | 1.39857   | 1.66112         | 0          | 1         | 1        |
| Ldb1             | 5.39671   | 6.43836         | 0          | 1         | 1        |
| Psd              | 2.38749   | 2.44062         | 0.0317505  | 0.886041  | 0.963781 |
| Psd_j4           | 0.543866  | 0.381253        | -0.512502  | 0.109883  | 0.412487 |
| Cuedc2_j1        | 20.3495   | 19.0272         | -0.0969318 | 0.537616  | 0.807704 |
| Actr1a           | 7.42651   | 7.71019         | 0          | 1         | 1        |
| Actr1a_j3        | 56.3582   | 53.3422         | 0          | 1         | 1        |
| Arl3             | 10.7119   | 9.46561         | -0.178449  | 0.08767   | 0.362439 |
| Nt5c2            | 0.0473532 | 0.114713        | 0          | 1         | 1        |
| Pcgf6_j4         | 1.95528   | 1.72527         | -0.180558  | 0.36023   | 0.695222 |
| Pcgf6_j5         | 0.638992  | 0.531224        | -0.266477  | 0.492873  | 0.781353 |
| Usmg5_j1         | 0.941609  | 0.556483        | 0          | 1         | 1        |
| Calhm2           | 1.11941   | 1.34742         | 0.267462   | 0.226649  | 0.573724 |
| Sh3pxd2a_j4      | 2.7923    | 2.97261         | 0          | 1         | 1        |
| Sh3pxd2a_j2      | 4.54067   | 4.23827         | 0          | 1         | 1        |
| Obfc1_j3         | 0.0703796 | 0 -1.79769e+308 |            | 0.0093783 | 1        |
| Itrip            | 0.359585  | 0.463769        | 0.367072   | 0.263446  | 0.612269 |
| Rpl13a-ps1       | 31.7075   | 34.2542         | 0.111456   | 0.374994  | 0.707307 |
| Sorcs1_j4        | 2.31994   | 1.82082         | 0          | 1         | 1        |
| Xpnpep1_j3       | 0.789207  | 0.655041        | 0          | 1         | 1        |
| Xpnpep1          | 2.35779   | 2.88723         | 0          | 1         | 1        |
| Smndc1_j3        | 0.382853  | 0.155213        | -1.30254   | 0.115016  | 0.421858 |
| 5830416P10Rik_j1 | 0.115145  | 0.0711058       | -0.695417  | 0.456516  | 1        |

|                  |           |           |               |           |           |
|------------------|-----------|-----------|---------------|-----------|-----------|
| XLOC_017276      | 0.185029  | 0.147619  | -0.325874     | 0.647163  | 0.863989  |
| Gpam_j7          | 0.617103  | 0.583689  | 0             | 1         | 1         |
| Gpam_j2          | 5.11669   | 3.39832   | 0             | 1         | 1         |
| Gpam             | 2.80616   | 2.41207   | 0             | 1         | 1         |
| Nrap_j1          | 0.118979  | 0.137001  | 0.203481      | 0.855199  | 1         |
| Dclre1a_j3       | 0.170112  | 0.242053  | 0.508837      | 0.256568  | 0.605481  |
| A630007B06Rik_j4 | 2.78986   | 2.19185   | 0             | 1         | 1         |
| A630007B06Rik_j1 | 0.960819  | 1.25995   | 0             | 1         | 1         |
| A630007B06Rik_j2 | 3.69059   | 3.6003    | 0             | 1         | 1         |
| Afap1l2_j1       | 1.44673   | 0.332741  | 0             | 1         | 1         |
| Afap1l2          | 2.02846   | 2.16972   | 0             | 1         | 1         |
| XLOC_017287      | 0.307746  | 0.228334  | -0.430595     | 0.127579  | 0.445171  |
| Ablim1_j6        | 1.31619   | 1.03049   | 0             | 1         | 1         |
| Ablim1_j2        | 11.7944   | 11.5003   | 0             | 1         | 1         |
| Ablim1_j7        | 5.39353   | 2.54678   | 0             | 1         | 1         |
| AK045643_j2      | 2.12921   | 1.69456   | 0             | 1         | 1         |
| AK045643         | 1.38021   | 1.25609   | 0             | 1         | 1         |
| AK045643_j5      | 0.46423   | 0.531858  | 0             | 1         | 1         |
| GDNFR-alpha_j5   | 0.529621  | 0.114563  | 0             | 1         | 1         |
| GDNFR-alpha_j6   | 1.99633   | 5.97858   | 0             | 1         | 1         |
| Hspa12a_j2       | 23.55     | 21.1757   | 0             | 1         | 1         |
| Hspa12a          | 22.0806   | 16.0392   | 0             | 1         | 1         |
| 4930506M07Rik_j3 | 0.52022   | 0.475078  | 0             | 1         | 1         |
| 4930506M07Rik_j5 | 1.41966   | 1.14567   | 0             | 1         | 1         |
| 4930506M07Rik_j4 | 0.0650388 | 0.0195772 | 0             | 1         | 1         |
| Pdzd8            | 1.71177   | 1.4948    | 0             | 1         | 1         |
| Rab11fip2_j1     | 3.29837   | 2.14789   | 0             | 1         | 1         |
| D19Ert737e       | 1.89806   | 1.54437   | -0.297501     | 0.0818571 | 0.348581  |
| 2700078E11Rik    | 3.47246   | 3.63187   | 0             | 1         | 1         |
| 2700078E11Rik    | 3.76023   | 3.3155    | 0             | 1         | 1         |
| Eif3a_j1         | 0.0529478 | 0         | 0             | 1         | 1         |
| Eif3a            | 14.4096   | 13.5696   | 0             | 1         | 1         |
| Sfxn4            | 0.315458  | 0.322961  | 0.0339117     | 0.897711  | 0.967451  |
| Prdx3            | 60.01     | 67.6607   | 0.173115      | 0.0563032 | 0.277692  |
| AK039536_j1      | 0.977643  | 1.09385   | 0.162038      | 0.483851  | 0.776148  |
| AK039536_j5      | 0.25154   | 0.30504   | 0.27821       | 0.50689   | 0.789319  |
| Csf2ra_j11       | 4.03718   | 4.1205    | 0.0294691     | 0.922779  | 0.975933  |
| Csf2ra_j18       | 0.558356  | 0.15268   | -1.87068      | 0.0100857 | 0.0860559 |
| Csf2ra_j17       | 0.121764  | 0         | -1.79769e+308 | 0.0063358 | 1         |
| Chka_j4          | 2.39528   | 1.99185   | 0             | 1         | 1         |
| Aldh3b2_j1       | 0.221751  | 0.332888  | 0.586099      | 0.385396  | 0.714041  |
| Doc2g_j1         | 0.274499  | 0.0954022 | -1.5247       | 0.0408637 | 0.227078  |
| Pitpnm1          | 0.30454   | 0.371658  | 0             | 1         | 1         |
| Coro1b_j4        | 26.041    | 28.8759   | 0             | 1         | 1         |
| Coro1b_j5        | 2.95561   | 3.15114   | 0             | 1         | 1         |
| Ptprcap          | 0.732321  | 0.793244  | 0             | 1         | 1         |
| Ppp1ca_j2        | 51.0349   | 64.2113   | 0             | 1         | 1         |

|             |           |                 |            |           |           |
|-------------|-----------|-----------------|------------|-----------|-----------|
| Ppp1ca_j1   | 44.2047   | 36.9127         | 0          | 1         | 1         |
| Pcx         | 8.04967   | 7.72339         | -0.0596951 | 0.532383  | 0.804231  |
| Mrpl11_j1   | 17.6269   | 18.2225         | 0.0479374  | 0.731396  | 0.904975  |
| B3gnt1_j2   | 0.459201  | 0.662554        | 0.528912   | 0.371247  | 0.70416   |
| Rin1_j4     | 0.208175  | 0.857853        | 2.04294    | 1.59E-09  | 1.29E-07  |
| Yif1a_j1    | 10.3752   | 10.1595         | -0.0303097 | 0.872588  | 0.959686  |
| Yif1a       | 3.86556   | 3.9095          | 0.0163057  | 0.886149  | 0.963821  |
| Fibp_j4     | 0.250513  | 0.352935        | 0          | 1         | 1         |
| Efemp2      | 3.5762    | 4.48264         | 0          | 1         | 1         |
| Rnaseh2c_j4 | 0.0811389 | 0.159413        | 0          | 1         | 1         |
| Map3k11_j2  | 0.309166  | 0 -1.79769e+308 |            | 1.33E-09  | 1.10E-07  |
| Ltbp3_j9    | 2.72854   | 2.32791         | 0          | 1         | 1         |
| Syvn1_j1    | 1.52646   | 1.70046         | 0          | 1         | 1         |
| Atg2a_j4    | 0.021153  | 0.201559        | 3.25227    | 0.0002279 | 0.0042774 |
| Atg2a       | 4.58813   | 4.47351         | -0.0364961 | 0.760267  | 0.917459  |
| Atg2a_j7    | 8.39885   | 10.2865         | 0.292491   | 0.0216873 | 0.148971  |
| Sf1_j1      | 3.34172   | 3.76223         | 0          | 1         | 1         |
| Rasgrp2_j1  | 0.139558  | 0.112262        | -0.313996  | 0.684632  | 0.882135  |
| Rasgrp2_j5  | 0.492246  | 0.401535        | -0.293853  | 0.594277  | 0.83843   |
| Nrxn2_j9    | 15.4863   | 16.5635         | 0.0970086  | 0.454997  | 0.758777  |
| Trpt1_j2    | 3.6603    | 2.98601         | -0.293746  | 0.404414  | 0.726779  |
| Trpt1_j3    | 0.110626  | 0 -1.79769e+308 |            | 0.0030849 | 1         |
| Trpt1_j4    | 0.243302  | 0.120914        | -1.00876   | 0.184413  | 0.524929  |
| Macro1_j1   | 4.38717   | 4.05381         | -0.11401   | 0.37799   | 0.7096    |
| Atl3        | 6.13946   | 4.96473         | 0          | 1         | 1         |
| Atl3_j2     | 0.276626  | 0.829472        | 0          | 1         | 1         |
| XLOC_016766 | 8.11395   | 11.8889         | 0.551135   | 0.34416   | 0.683976  |
| XLOC_016767 | 1.18206   | 1.42511         | 0.26977    | 0.76516   | 0.919657  |
| Chrm1       | 0.0375166 | 0.120623        | 1.68491    | 0.0999846 | 1         |
| Chrm1       | 0.166447  | 0.110466        | -0.591461  | 0.391269  | 0.717886  |
| Wdr74_j3    | 0.245638  | 0.664265        | 0          | 1         | 1         |
| Stx5a_j1    | 3.05858   | 2.93791         | 0          | 1         | 1         |
| Hnrnpul2_j2 | 16.7134   | 19.4585         | 0          | 1         | 1         |
| Bscl2       | 19.4352   | 18.464          | 0          | 1         | 1         |
| Lrrn4cl     | 0.383619  | 0.435225        | 0.182086   | 0.58545   | 0.833935  |
| XLOC_016777 | 0.134684  | 0.20851         | 0.630536   | 0.267023  | 0.616066  |
| Ganab_j3    | 1.13457   | 0.283802        | 0          | 1         | 1         |
| Ganab_j9    | 0.0839888 | 0.0477675       | 0          | 1         | 1         |
| Ganab_j11   | 7.90579   | 11.8982         | 0          | 1         | 1         |
| B3gat3      | 17.5875   | 16.4737         | 0          | 1         | 1         |
| Eef1g_j5    | 0.552474  | 0.390262        | -0.501464  | 0.318053  | 0.661506  |
| Eef1g_j11   | 30.5544   | 39.1227         | 0.356628   | 0.0018626 | 0.0236233 |
| Fth1_j2     | 169.726   | 122.139         | 0          | 1         | 1         |
| Fth1_j3     | 0         | 736.412         | 0          | 1         | 1         |
| Fth1_j4     | 686.7     | 0               | 0          | 1         | 1         |
| Rab3il1     | 0.479207  | 0.57678         | 0.267371   | 0.307067  | 0.652144  |
| Rab3il1     | 0.554021  | 1.49178         | 1.42903    | 3.52E-05  | 0.0008844 |

|                  |           |           |              |           |           |
|------------------|-----------|-----------|--------------|-----------|-----------|
| Fads3            | 6.64678   | 10.6512   | 0            | 1         | 1         |
| Cpsf7_j1         | 0.1016    | 0.152497  | 0            | 1         | 1         |
| Ddb1             | 65.5319   | 70.4984   | 0.105392     | 0.219467  | 0.566015  |
| Vps37c_j2        | 1.62302   | 2.55727   | 0.655922     | 0.0997814 | 0.391044  |
| Slc15a3_j2       | 0.862042  | 1.67773   | 0            | 1         | 1         |
| Prpf19           | 29.6763   | 27.0511   | 0            | 1         | 1         |
| Ms4a6c           | 0.110926  | 0.139089  | 0.326408     | 0.77388   | 1         |
| Ms4a6c_j1        | 0.269605  | 0.792638  | 1.55582      | 0.0061669 | 0.0598377 |
| Ms4a6b_j1        | 0.0638785 | 0.0260381 | -1.29471     | 0.469662  | 1         |
| Pat1_j2          | 0.763907  | 0.906052  | 0.246197     | 0.383305  | 0.712965  |
| Lpxn             | 0.279341  | 0.584608  | 1.06544      | 0.0122955 | 0.099941  |
| XLOC_016816      | 0.240493  | 0.247167  | 0.0394899    | 0.96232   | 0.989496  |
| XLOC_016820      | 0.300055  | 0.371243  | 0.307135     | 0.669363  | 0.874813  |
| XLOC_016820      | 0.926876  | 0.690602  | -0.424522    | 0.284598  | 0.633336  |
| Prune2_j7        | 273.196   | 231.008   | -0.241997    | 0.0076924 | 0.070685  |
| Rfk_j1           | 6.76741   | 14.2916   | 0            | 1         | 1         |
| BC016495         | 2.93364   | 3.2045    | 0            | 1         | 1         |
| Trpm6_j5         | 0.0909792 | 0.202025  | 1.15093      | 0.397745  | 0.722115  |
| Aldh1a1_j2       | 1.43538   | 0.551096  | -1.38106     | 0.0001028 | 0.0022077 |
| XLOC_016834      | 0.16282   | 0.12566   | 0            | 1         | 1         |
| Zfand5_j4        | 0.452696  | 1.1639    | 0            | 1         | 1         |
| Fam108b          | 1.16039   | 1.23216   | 0            | 1         | 1         |
| Tmem2            | 0.430248  | 0.518511  | 0            | 1         | 1         |
| Ptar1_j4         | 0.186031  | 0.232465  | 0.321469     | 0.749552  | 0.913026  |
| Ptar1_j2         | 0.0781321 | 0.0837376 | 0.0999606    | 0.843718  | 1         |
| Apba1_j1         | 20.0217   | 15.8635   | 0            | 1         | 1         |
| Apba1_j5         | 0.0631671 | 0         | 0            | 1         | 1         |
| Dock8_j2         | 0.0508742 | 0.30636   | 0            | 1         | 1         |
| Kank1            | 0.668761  | 0.421467  | 0            | 1         | 1         |
| Smarca2_j6       | 0.270241  | 0.0769308 | -1.81261     | 0.0289995 | 0.181495  |
| Smarca2_j9       | 0.276892  | 0.466228  | 0.751713     | 0.380019  | 0.711076  |
| Vldlr            | 0.906781  | 1.34198   | 0            | 1         | 1         |
| Vldlr            | 1.41257   | 1.29294   | 0            | 1         | 1         |
| Slc1a1_j2        | 0.366622  | 0.453893  | 0.30806      | 0.502169  | 0.786191  |
| Ppapdc2          | 5.65043   | 5.02336   | -0.169706    | 0.219883  | 0.566614  |
| C030046E11Rik_j1 | 1.03364   | 0.744328  | -0.473726    | 1         | 1         |
| Uhrf2_j3         | 8.03878   | 9.30907   | 0.21166      | 0.0746565 | 0.329583  |
| Minpp1           | 4.67282   | 4.54082   | -0.0413402   | 0.771243  | 0.922307  |
| Minpp1_j2        | 13.2528   | 14.9829   | 0.177017     | 0.171922  | 0.509035  |
| Lipk_j1          | 0         | 0.162953  | 1.79769e+308 | 0.0161282 | 0.121077  |
| Stambpl1_j3      | 0.653474  | 3.12262   | 0            | 1         | 1         |
| Ifit2_j1         | 3.43407   | 4.88527   | 0            | 1         | 1         |
| Ifit3            | 0.0578427 | 2.75905   | 0            | 1         | 1         |
| Ifit1_j1         | 3.95242   | 5.30917   | 0            | 1         | 1         |
| Pcgf5            | 0.0407278 | 0.274628  | 0            | 1         | 1         |
| Hectd2_j6        | 0.453011  | 0.492965  | 0.121939     | 0.769763  | 0.921491  |
| Tnks2_j3         | 5.57142   | 5.69742   | 0            | 1         | 1         |

|                  |           |            |              |           |           |
|------------------|-----------|------------|--------------|-----------|-----------|
| Btaf1_j2         | 0.0403958 | 0.135801   | 0            | 1         | 1         |
| Kif11_j5         | 0.121995  | 0.0966948  | -0.335309    | 0.64513   | 1         |
| Tbc1d12          | 0.635481  | 0.825299   | 0.377068     | 0.201056  | 0.544463  |
| XLOC_016900      | 0.0988317 | 0.00806595 | -3.61506     | 0.447629  | 1         |
| Ubttd1_j5        | 0.994919  | 1.37071    | 0            | 1         | 1         |
| Scd2_j1          | 48.128    | 59.7565    | 0            | 1         | 1         |
| Scd2_j4          | 122.269   | 141.866    | 0            | 1         | 1         |
| Pax2_j2          | 0.0446739 | 0.143478   | 1.68332      | 0.175702  | 1         |
| Lzts2            | 4.48527   | 5.47099    | 0.286607     | 0.028751  | 0.180496  |
| Sfxn3_j1         | 0.217252  | 0.442101   | 0            | 1         | 1         |
| Kazald1_j3       | 0.829465  | 1.3424     | 0.694564     | 0.120391  | 0.432061  |
| XLOC_016934      | 0.127487  | 0.112701   | -0.177849    | 0.819829  | 1         |
| XLOC_016936      | 0         | 0.0704912  | 1.79769e+308 | 0.093929  | 1         |
| Btrc             | 4.37578   | 4.38116    | 0            | 1         | 1         |
| Btrc_j1          | 4.30037   | 3.24524    | 0            | 1         | 1         |
| Nolc1            | 1.8859    | 3.44375    | 0            | 1         | 1         |
| Nfkb2            | 1.13567   | 1.6246     | 0.516543     | 0.0014354 | 0.0190692 |
| Fbxl15           | 1.74416   | 1.68222    | -0.0521654   | 0.694568  | 0.887364  |
| Sfxn2_j6         | 0.282307  | 0.350153   | 0.310719     | 0.370346  | 0.703609  |
| As3mt_j1         | 0         | 0.425936   | 1.79769e+308 | 0.003228  | 0.0365464 |
| Cnm2_j2          | 2.276     | 2.41561    | 0            | 1         | 1         |
| Pdcd11_j2        | 0.0712398 | 0.24542    | 0            | 1         | 1         |
| Neurl1a          | 1.12607   | 1.8051     | 0            | 1         | 1         |
| Slk_j7           | 4.85958   | 5.91188    | 0            | 1         | 1         |
| 6330577E15Rik_j2 | 21.7818   | 27.4108    | 0            | 1         | 1         |
| Gsto2            | 0.177094  | 0.216306   | 0.288561     | 0.736465  | 0.907205  |
| Add3             | 1.8808    | 2.47859    | 0.398167     | 0.0898426 | 0.367861  |
| Mxi1_j2          | 2.23851   | 1.95133    | 0            | 1         | 1         |
| Dusp5_j2         | 6.32763   | 4.59303    | 0            | 1         | 1         |
| XLOC_016971      | 0.165613  | 0.0549182  | -1.59246     | 0.299527  | 0.646333  |
| Rbm20_j2         | 8.20E-06  | 0.234131   | 14.8017      | 0.985235  | 0.995689  |
| Pdcd4_j1         | 16.0686   | 12.79      | -0.329226    | 0.0074445 | 0.069006  |
| Vti1a_j1         | 6.18763   | 5.28442    | 0            | 1         | 1         |
| Vti1a            | 5.73253   | 5.37445    | 0            | 1         | 1         |
| Tcf7l2_j14       | 0         | 0.107843   | 1.79769e+308 | 0.0206526 | 1         |
| Tcf7l2_j15       | 0.479855  | 0.538191   | 0.16552      | 0.707433  | 0.89332   |
| XLOC_016979      | 0.0669318 | 0.0680301  | 0.0234827    | 0.98364   | 1         |
| mKIAA1600        | 2.98713   | 1.87491    | 0            | 1         | 1         |
| AK040090_j3      | 0.306573  | 0.300145   | -0.0305747   | 0.961694  | 0.989186  |
| Atrnl1_j7        | 0         | 0.231021   | 0            | 1         | 1         |
| 1700011F14Rik_j2 | 1.59602   | 2.10086    | 0.396496     | 0.121568  | 0.434176  |
| 1700011F14Rik_j3 | 1.12626   | 1.82718    | 0.698073     | 0.0066892 | 0.0635533 |
| Pnlip_j1         | 1.26824   | 1.67092    | 0.397816     | 0.101225  | 0.394004  |
| XLOC_017002      | 39.287    | 44.8144    | 0.189914     | 0.249943  | 0.597443  |
| Ighmbp2_j1       | 1.0134    | 0.927085   | 0            | 1         | 1         |
| Ppp6r3_j5        | 1.23311   | 0.902874   | 0            | 1         | 1         |
| Ppp6r3_j6        | 0.194635  | 0.336512   | 0            | 1         | 1         |

|                  |           |           |               |           |           |
|------------------|-----------|-----------|---------------|-----------|-----------|
| Ndufs8_j2        | 4.74217   | 7.02692   | 0             | 1         | 1         |
| Aldh3b1_j3       | 0.911853  | 0.795768  | -0.196455     | 0.678285  | 0.879015  |
| Ndufv1           | 96.7247   | 96.4683   | -0.00382931   | 0.96493   | 0.990054  |
| Ndufv1_j2        | 0.945201  | 2.54298   | 1.42782       | 9.65E-05  | 0.0020879 |
| Gstp1            | 30.254    | 37.7172   | 0.3181        | 0.0050352 | 0.0509945 |
| Rps6kb2_j2       | 0.206693  | 0.148866  | 0             | 1         | 1         |
| Carns1_j2        | 0.49846   | 0.470854  | -0.0821976    | 0.8425    | 0.95025   |
| Tbc1d10c_j4      | 0.166403  | 0.0920795 | 0             | 1         | 1         |
| Ankrd13d_j3      | 0.0874387 | 0.10872   | 0             | 1         | 1         |
| Ankrd13d_j2      | 0.077323  | 0.0678742 | 0             | 1         | 1         |
| Lrfn4            | 1.87039   | 2.27901   | 0.285066      | 0.162843  | 0.498174  |
| Rce1_j1          | 1.54827   | 1.90665   | 0.300381      | 0.195322  | 0.5377    |
| Bbs1             | 2.08604   | 1.32373   | 0             | 1         | 1         |
| Dpp3_j5          | 0         | 0.27266   | 0             | 1         | 1         |
| Peli3_j1         | 1.13329   | 1.01442   | -0.159865     | 0.553861  | 0.817269  |
| Tmem151a         | 9.4186    | 8.80159   | -0.0977486    | 0.389516  | 0.716664  |
| Cnih2            | 2.61038   | 2.64877   | 0.0210583     | 0.921231  | 0.975363  |
| Rab1b_j1         | 70.7133   | 78.208    | 0.145334      | 0.102758  | 0.397119  |
| Klc2_j4          | 96.7117   | 90.2665   | -0.0994998    | 0.251324  | 0.599189  |
| Sf3b2_j2         | 30.1717   | 33.7269   | 0             | 1         | 1         |
| Sf3b2            | 0.0450649 | 0.10142   | 0             | 1         | 1         |
| Banf1_j1         | 15.9823   | 14.3566   | -0.154765     | 0.361308  | 0.695952  |
| Mus81            | 0.223341  | 0.229461  | 0             | 1         | 1         |
| Kat5_j1          | 0.592447  | 0.5066    | 0             | 1         | 1         |
| Sipa1_j4         | 0.229012  | 0.187582  | -0.287905     | 0.52426   | 0.799783  |
| Sipa1            | 0.0925967 | 0         | -1.79769e+308 | 0.0009889 | 1         |
| Pcnx13_j6        | 1.83215   | 2.21464   | 0.273537      | 0.296801  | 0.643452  |
| Pcnx13_j8        | 1.4187    | 1.2915    | -0.135524     | 0.387906  | 0.715434  |
| Ehbp1l1_j4       | 1.46494   | 1.72883   | 0             | 1         | 1         |
| Sssca1_j1        | 22.5587   | 27.2347   | 0             | 1         | 1         |
| Scyl1_j1         | 12.5004   | 11.832    | 0             | 1         | 1         |
| Malat1           | 0.361309  | 0.584758  | 0             | 1         | 1         |
| AK197973_j1      | 15.5477   | 18.5011   | 0             | 1         | 1         |
| AK197973_j2      | 12.4121   | 14.7979   | 0             | 1         | 1         |
| Dpf2_j1          | 3.80503   | 3.79559   | -0.00358396   | 0.982641  | 0.9947    |
| Pola2_j4         | 0.461903  | 0.511173  | 0             | 1         | 1         |
| 1110014N23Rik_j5 | 10.0217   | 8.85463   | 0             | 1         | 1         |
| Sac3d1_j1        | 12.5335   | 14.951    | 0.254452      | 0.145227  | 0.473044  |
| Snx15_j2         | 5.07326   | 8.86963   | 0             | 1         | 1         |
| Snx15_j1         | 12.8547   | 13.0285   | 0             | 1         | 1         |
| Arl2_j1          | 25.2639   | 31.1918   | 0             | 1         | 1         |
| Ppp2r5b_j2       | 67.5503   | 78.2478   | 0             | 1         | 1         |
| Esrra_j1         | 4.68102   | 3.13254   | -0.579489     | 0.000167  | 0.0033049 |
| Plcb3_j1         | 28.8008   | 27.6573   | -0.0584484    | 0.539389  | 0.808383  |
| Plcb3_j14        | 2.12314   | 2.2078    | 0.0564113     | 0.756872  | 0.91616   |
| Fkbp2_j1         | 26.8865   | 26.0286   | -0.0467853    | 0.766844  | 0.920508  |
| Vegfb_j7         | 11.3816   | 11.8602   | 0.0594238     | 0.796905  | 0.932552  |

|                  |           |           |               |           |           |
|------------------|-----------|-----------|---------------|-----------|-----------|
| Flrt1_j1         | 0.220235  | 0         | -1.79769e+308 | 9.96E-08  | 5.35E-06  |
| Cox8a            | 0.352524  | 0.910463  | 1.36888       | 0.002028  | 0.0252558 |
| Naa40_j3         | 0.624579  | 0.177437  | -1.81558      | 0.0024426 | 0.0292953 |
| Naa40_j4         | 0.216505  | 0         | -1.79769e+308 | 7.15E-06  | 0.0002315 |
| Mark2_j1         | 0.384124  | 0.484741  | 0             | 1         | 1         |
| Rtn3_j1          | 0         | 35.759    | 0             | 1         | 1         |
| Slc3a2_j1        | 12.8253   | 25.6583   | 0             | 1         | 1         |
| Gng3             | 21.0193   | 22.4149   | 0             | 1         | 1         |
| Incenp           | 0         | 0.144182  | 0             | 1         | 1         |
| Best1_j1         | 1.39505   | 1.29712   | 0             | 1         | 1         |
| Fads2_j1         | 56.3501   | 60.8659   | 0             | 1         | 1         |
| Sdhaf2_j1        | 18.3407   | 17.4273   | 0             | 1         | 1         |
| Tmem216          | 0.335631  | 0.270083  | -0.313474     | 0.710275  | 0.894477  |
| Tmem138_j1       | 2.54786   | 2.729     | 0.0990856     | 0.662103  | 0.871836  |
| Tmem138          | 1.01627   | 1.2795    | 0.332302      | 0.309497  | 0.654153  |
| Cd6_j1           | 0.0956709 | 0.087016  | -0.1368       | 0.876466  | 1         |
| Tmem132a_j2      | 2.08221   | 2.22434   | 0             | 1         | 1         |
| Ms4a7_j1         | 0.411817  | 0.696471  | 0.758061      | 0.299538  | 0.646333  |
| Zfp91_j1         | 1.22226   | 1.59861   | 0             | 1         | 1         |
| Tle4_j4          | 1.14395   | 1.28914   | 0             | 1         | 1         |
| Psat1            | 2.58397   | 3.52984   | 0.45001       | 0.0285957 | 0.179892  |
| Cep78_j1         | 1.80685   | 1.818     | 0.00887832    | 0.964457  | 0.989999  |
| Vps13a_j4        | 0.0849654 | 0         | -1.79769e+308 | 0.0626404 | 1         |
| Vps13a_j5        | 2.79164   | 2.60179   | -0.101606     | 0.48509   | 0.776871  |
| Vps13a_j7        | 0         | 0.0835859 | 1.79769e+308  | 0.145031  | 1         |
| XLOC_017144      | 0.0364581 | 0.0621256 | 0.768951      | 0.502146  | 1         |
| Pcsk5_j1         | 0.0275583 | 0.141739  | 2.36268       | 0.0196544 | 1         |
| Pcsk5_j2         | 0.277822  | 0.333217  | 0.262302      | 0.477519  | 0.77269   |
| Ostf1_j7         | 69.3157   | 75.5077   | 0             | 1         | 1         |
| 1110059E24Rik_j2 | 2.04596   | 2.09578   | 0             | 1         | 1         |
| 1110059E24Rik    | 2.37315   | 2.53268   | 0             | 1         | 1         |
| Smc5_j4          | 0.82546   | 0.993633  | 0             | 1         | 1         |
| Mamdc2_j3        | 0.540289  | 0.930238  | 0.783868      | 0.107529  | 0.407699  |
| Fam189a2_j1      | 1.89874   | 2.07973   | 0             | 1         | 1         |
| Fam189a2_j3      | 0         | 1.82112   | 0             | 1         | 1         |
| Tjp2_j5          | 0         | 0.520996  | 1.79769e+308  | 7.71E-08  | 4.31E-06  |
| Tjp2_j7          | 0.534444  | 0.211205  | -1.3394       | 0.0037208 | 0.0407528 |
| Fxn_j1           | 0.0764082 | 0.104818  | 0.456089      | 0.601583  | 1         |
| Pip5k1b_j2       | 0.898333  | 1.23932   | 0.46423       | 0.392621  | 0.718796  |
| Rfx3_j2          | 0.0740164 | 0.0632176 | -0.227519     | 0.906801  | 1         |
| 4430402I18Rik_j4 | 0.259915  | 0.204323  | -0.347192     | 0.432491  | 0.744252  |
| 5033414D02Rik_j3 | 0         | 0.0783618 | 1.79769e+308  | 0.0669447 | 1         |
| Ermp1            | 18.0749   | 12.7998   | -0.497865     | 3.19E-07  | 1.50E-05  |
| 9930021J03Rik_j4 | 0.417966  | 0.630608  | 0             | 1         | 1         |
| 9930021J03Rik_j7 | 0.565906  | 0.371675  | 0             | 1         | 1         |
| Prkg1_j3         | 0.357096  | 0.41503   | 0.216903      | 0.782912  | 0.926793  |
| Prkg1_j4         | 0.843525  | 0         | -1.79769e+308 | 4.30E-08  | 2.57E-06  |



|                  |            |             |           |           |           |
|------------------|------------|-------------|-----------|-----------|-----------|
| Prkg1_j6         | 0.31395    | 0.125999    | -1.31713  | 0.223946  | 0.571105  |
| Sgms1            | 2.93862    | 3.54267     | 0         | 1         | 1         |
| Gm14446          | 0.871142   | 0.793581    | 0         | 1         | 1         |
| Htr7_j6          | 1.40416    | 1.02797     | 0         | 1         | 1         |
| Htr7             | 1.82309    | 0.834404    | 0         | 1         | 1         |
| Cpeb3_j4         | 0.501093   | 0.000499715 | 0         | 1         | 1         |
| Ide_j1           | 0.366496   | 0.581093    | 0         | 1         | 1         |
| Ide              | 1.91847    | 1.92748     | 0         | 1         | 1         |
| Rbp4             | 0.356228   | 0.309434    | -0.203169 | 0.735665  | 0.906939  |
| 5730455O13Rik_j3 | 2.25684    | 1.92347     | 0         | 1         | 1         |
| Noc3l_j3         | 0.745253   | 0.783054    | 0.0713798 | 0.811516  | 0.938071  |
| Pdlim1_j1        | 8.52491    | 11.0217     | 0.370588  | 0.053981  | 0.270788  |
| Pdlim1_j2        | 0.099952   | 0.137272    | 0.457735  | 0.753539  | 1         |
| Sorbs1_j8        | 24.5625    | 28.6884     | 0         | 1         | 1         |
| Aldh18a1_j2      | 0.0755152  | 1.17939     | 0         | 1         | 1         |
| Blnk_j1          | 0.276537   | 0.542309    | 0.971643  | 0.115164  | 0.422095  |
| Pik3ap1_j4       | 0.103997   | 0.142079    | 0.450158  | 0.551014  | 1         |
| Slit1_j1         | 0          | 0.255193    | 0         | 1         | 1         |
| Slit1_j2         | 0.35669    | 0.813817    | 0         | 1         | 1         |
| Arhgap19_j3      | 0.407478   | 0.385604    | 0         | 1         | 1         |
| Mms19_j2         | 0.960821   | 1.08325     | 0         | 1         | 1         |
| Loxl4_j1         | 0.208349   | 0.129749    | -0.683277 | 0.18122   | 0.521107  |
| Hps1             | 0.773232   | 1.60701     | 1.0554    | 6.14E-05  | 0.0014191 |
| Hps1_j4          | 0.309357   | 0.193252    | -0.678793 | 0.242343  | 0.589797  |
| Hps1_j3          | 0.00783646 | 0.372248    | 5.56992   | 0.0070115 | 0.0659455 |
| Dnmbp_j7         | 1.19213    | 1.44973     | 0.282238  | 0.199153  | 0.542214  |
| Erlin1           | 0.618021   | 2.04018     | 0         | 1         | 1         |
| Chuk_j2          | 1.81501    | 1.54477     | -0.232591 | 0.483706  | 0.776112  |
| Cwf19l1_j1       | 1.00356    | 1.08504     | 0         | 1         | 1         |
| Bloc1s2_j1       | 0.674598   | 0.803367    | 0         | 1         | 1         |
| Scd1_j2          | 0.38       | 0.587914    | 0         | 1         | 1         |
| Sec31b_j4        | 0.132283   | 0.1173      | -0.173427 | 0.793018  | 1         |
| Ndufb8_j5        | 50.6297    | 25.7368     | 0         | 1         | 1         |
| Fbxw4_j2         | 1.15961    | 1.19783     | 0.0467826 | 0.811473  | 0.938053  |
| Npm3_j2          | 0.401027   | 0.255176    | 0         | 1         | 1         |
| Mgea5            | 13.0655    | 14.7804     | 0         | 1         | 1         |
| Mgea5            | 18.1403    | 15.8098     | 0         | 1         | 1         |
| Kcnp2_j1         | 5.42829    | 8.70732     | 0         | 1         | 1         |
| Ldb1             | 5.00583    | 4.88019     | 0         | 1         | 1         |
| Ldb1_j8          | 3.33391    | 4.34766     | 0         | 1         | 1         |
| Psd_j3           | 0.0291295  | 0.0674679   | 1.21172   | 0.286128  | 1         |
| Cuedc2           | 57.2024    | 63.3253     | 0.146706  | 0.140781  | 0.466737  |
| Nt5c2            | 2.80269    | 2.83426     | 0         | 1         | 1         |
| Usmg5            | 1.53483    | 2.14141     | 0         | 1         | 1         |
| Sh3pxd2a_j1      | 0.95488    | 0.882364    | 0         | 1         | 1         |
| Sorcs1_j3        | 0          | 0.0737853   | 0         | 1         | 1         |
| Sorcs1_j2        | 0.176279   | 0.111683    | 0         | 1         | 1         |

|                  |             |           |               |           |           |
|------------------|-------------|-----------|---------------|-----------|-----------|
| Xpnpep1_j2       | 1.85691     | 3.02362   | 0             | 1         | 1         |
| Smndc1           | 9.03977     | 8.71795   | -0.0522966    | 0.712172  | 0.895619  |
| Smndc1           | 2.54152     | 3.23491   | 0.348031      | 0.111405  | 0.415473  |
| XLOC_017274      | 0.358455    | 0.380352  | 0.0855422     | 0.913674  | 0.972914  |
| XLOC_017274      | 0.0669214   | 0         | -1.79769e+308 | 0.178611  | 1         |
| Bbip1            | 7.08745     | 6.63282   | -0.0956453    | 0.381175  | 0.711771  |
| Gpam_j5          | 0.177569    | 0.0599869 | 0             | 1         | 1         |
| Gucy2g_j1        | 0           | 0.0860059 | 1.79769e+308  | 0.0836485 | 1         |
| Zdhhc6           | 2.08558     | 2.08384   | -0.00119935   | 0.992853  | 0.997927  |
| Dclre1a_j1       | 1.08193     | 1.13277   | 0.066237      | 0.891752  | 0.965687  |
| Dclre1a_j2       | 0.115669    | 0.0418312 | -1.46735      | 0.153152  | 1         |
| Afap1l2_j2       | 0.763443    | 0.530746  | 0             | 1         | 1         |
| Ablim1_j1        | 0.781816    | 0.455794  | 0             | 1         | 1         |
| AK045643_j1      | 1.26124     | 0.924123  | 0             | 1         | 1         |
| Gfra1            | 23.458      | 40.2966   | 0             | 1         | 1         |
| 4930506M07Rik_j6 | 4.13775     | 4.24356   | 0             | 1         | 1         |
| Pdzd8_j2         | 5.90933     | 5.7656    | 0             | 1         | 1         |
| Rab11fip2_j3     | 0           | 0.509646  | 0             | 1         | 1         |
| 2700078E11Rik_j1 | 0.735329    | 0.638774  | 0             | 1         | 1         |
| Sfxn4_j1         | 5.15951     | 4.20468   | -0.295238     | 0.0275327 | 0.175607  |
| Csf2ra_j5        | 0.000933292 | 0.248065  | 8.05417       | 0.217107  | 0.563245  |
| Csf2ra_j4        | 0.432618    | 0         | -1.79769e+308 | 2.44E-10  | 2.28E-08  |
| Csf2ra_j6        | 0.695676    | 0.75784   | 0.123478      | 0.698298  | 0.888784  |
| Cpt1a_j2         | 0.3257      | 0.291011  | 0             | 1         | 1         |
| Unc93b1          | 3.1059      | 4.87058   | 0.649079      | 9.74E-05  | 0.0021058 |
| Acy3_j3          | 0.283918    | 0         | -1.79769e+308 | 0.0036244 | 0.0400224 |
| Nudt8_j1         | 1.42558     | 1.76675   | 0.309545      | 0.573925  | 0.827829  |
| Pitpm1_j3        | 8.73898     | 8.72411   | 0             | 1         | 1         |
| Coro1b_j3        | 7.33787     | 8.11725   | 0             | 1         | 1         |
| Ppp1ca_j4        | 17.851      | 25.0706   | 0             | 1         | 1         |
| Clcf1_j1         | 0.107056    | 0.0126812 | -3.0776       | 0.151913  | 1         |
| Spnb3_j5         | 0.130056    | 0.0149382 | -3.12205      | 0.0080245 | 1         |
| Rbm4b            | 2.01731     | 2.12258   | 0.0733883     | 0.758047  | 0.916747  |
| Ctsf_j1          | 0.132034    | 1.2953    | 3.2943        | 0.0002925 | 0.0052351 |
| Mrpl11_j2        | 9.09562     | 6.01223   | -0.597271     | 0.0589426 | 0.285423  |
| Rin1_j5          | 0.233704    | 0.0588764 | -1.98892      | 0.0174691 | 0.128162  |
| Fibp_j3          | 2.21835     | 2.39414   | 0             | 1         | 1         |
| Efemp2_j1        | 3.22339     | 3.47631   | 0             | 1         | 1         |
| Cfl1             | 2.2815      | 2.40381   | 0.0753418     | 0.542024  | 0.8099    |
| XLOC_016733      | 0.0961663   | 0.0758161 | -0.343028     | 0.713823  | 1         |
| XLOC_016733      | 0.132505    | 0.0513301 | -1.36817      | 0.237079  | 1         |
| Rnaseh2c_j2      | 0.182817    | 0.203452  | 0             | 1         | 1         |
| Rela_j3          | 0.0700631   | 0.0793605 | 0.179767      | 0.875792  | 1         |
| Map3k11          | 5.20449     | 5.74566   | 0.142716      | 0.270384  | 0.61953   |
| Kcnk7            | 0.137466    | 0.0692241 | -0.989728     | 0.384549  | 0.713264  |
| Ltbp3_j5         | 0.240599    | 0.272001  | 0             | 1         | 1         |
| Ltbp3_j7         | 0.367999    | 0.330383  | 0             | 1         | 1         |

|             |           |                 |            |           |           |
|-------------|-----------|-----------------|------------|-----------|-----------|
| AK009639    | 3.98694   | 4.11413         | 0.0453065  | 0.815848  | 0.94009   |
| Syv1        | 13.4614   | 15.5307         | 0          | 1         | 1         |
| Naaladl1_j1 | 0.368509  | 0.305781        | -0.269199  | 0.589043  | 0.835983  |
| Men1        | 0.0722822 | 0.048812        | -0.566405  | 0.721495  | 1         |
| Pygm        | 0.235611  | 0.217149        | -0.117723  | 0.801639  | 0.933942  |
| Nrxn2_j4    | 4.6609    | 3.33591         | -0.48253   | 0.0019852 | 0.0248239 |
| Nrxn2_j8    | 1.35154   | 0.251928        | -2.42352   | 8.66E-05  | 0.0018968 |
| Rcor2       | 0.26458   | 0.268785        | 0          | 1         | 1         |
| Atl3_j1     | 20.1821   | 18.6145         | 0          | 1         | 1         |
| XLOC_016767 | 0.278582  | 0 -1.79769e+308 |            | 0.0870715 | 0.360822  |
| Snhg1       | 7.07374   | 9.99379         | 0.498559   | 0.0064572 | 0.0619105 |
| Wdr74_j1    | 6.89829   | 7.43088         | 0          | 1         | 1         |
| Nxf1_j1     | 6.2879    | 7.25843         | 0          | 1         | 1         |
| Nxf1_j7     | 0.49078   | 0.366824        | 0          | 1         | 1         |
| Hnrnpul2_j1 | 3.07008   | 2.88325         | 0          | 1         | 1         |
| Ganab_j2    | 4.79746   | 5.46258         | 0          | 1         | 1         |
| Ganab_j8    | 0.138588  | 0.158186        | 0          | 1         | 1         |
| Eml3_j2     | 4.88289   | 5.6848          | 0          | 1         | 1         |
| Eef1g_j1    | 0.115415  | 0.106984        | -0.109441  | 0.797988  | 1         |
| Eef1g_j9    | 1.06016   | 0.515354        | -1.04064   | 0.0907585 | 0.370244  |
| XLOC_016781 | 0.0558649 | 0.0533368       | -0.0668107 | 0.94373   | 1         |
| Fth1_j1     | 0.394316  | 0.105614        | 0          | 1         | 1         |
| Rab3il1_j5  | 0.0937411 | 0 -1.79769e+308 |            | 0.0130303 | 1         |
| Syt7_j5     | 2.56437   | 3.31962         | 0          | 1         | 1         |
| Cpsf7_j3    | 4.92184   | 5.14601         | 0          | 1         | 1         |
| Cpsf7_j2    | 0.548866  | 1.34139         | 0          | 1         | 1         |
| Prpf19_j2   | 0.0888364 | 0.057523        | 0          | 1         | 1         |
| Osbp_j2     | 0.550356  | 0.292945        | 0          | 1         | 1         |
| Glyat_j1    | 0.40399   | 0.546574        | 0.436097   | 0.227647  | 0.574755  |
| Lpxn_j4     | 0.0949413 | 0 -1.79769e+308 |            | 0.0290028 | 1         |
| XLOC_016818 | 0.104626  | 0.0026931       | -5.27984   | 0.749899  | 1         |
| Gnaq_j5     | 5.28039   | 0.657866        | 0          | 1         | 1         |
| Prune2_j1   | 0.0765723 | 0.0188233       | -2.0243    | 0.0227854 | 1         |
| Prune2_j5   | 15.2896   | 8.92978         | -0.775859  | 8.88E-16  | 1.98E-13  |
| Prune2_j10  | 3.65711   | 1.73247         | -1.07788   | 0.0009197 | 0.0133701 |
| BC016495_j1 | 0.155364  | 0               | 0          | 1         | 1         |
| Aldh1a1_j5  | 0.992781  | 0.839831        | -0.241377  | 0.446279  | 0.753343  |
| Fam108b_j1  | 23.604    | 23.2107         | 0          | 1         | 1         |
| Trpm3_j3    | 0.735655  | 0.163838        | 0          | 1         | 1         |
| Klf9_j3     | 0.925832  | 0.451526        | 0          | 1         | 1         |
| Apba1_j2    | 28.7153   | 24.2086         | 0          | 1         | 1         |
| Apba1_j4    | 22.5064   | 21.8092         | 0          | 1         | 1         |
| Dock8_j4    | 0.318498  | 0.196696        | 0          | 1         | 1         |
| Kank1_j2    | 0.0571257 | 0               | 0          | 1         | 1         |
| Kank1_j1    | 0.118393  | 0               | 0          | 1         | 1         |
| Smarca2_j4  | 0.183142  | 0.0954326       | -0.940406  | 0.180099  | 0.519782  |
| Smarca2_j10 | 8.86072   | 10.4884         | 0.243295   | 0.120975  | 0.433073  |

|                  |           |                 |            |           |           |
|------------------|-----------|-----------------|------------|-----------|-----------|
| Vldlr_j10        | 0.412921  | 0.156507        | 0          | 1         | 1         |
| Rcl1_j2          | 0.0529781 | 0.0787975       | 0.572753   | 0.700634  | 1         |
| Rcl1             | 0.193952  | 0.260521        | 0.425697   | 0.583769  | 0.83315   |
| Jak2_j2          | 2.67322   | 3.69597         | 0          | 1         | 1         |
| Cd274            | 0.29733   | 0.203927        | -0.54401   | 0.281104  | 0.629634  |
| Cd274_j3         | 1.02172   | 1.13873         | 0.156424   | 0.51947   | 0.797067  |
| Il33_j1          | 0.345906  | 0 -1.79769e+308 |            | 7.01E-09  | 5.05E-07  |
| XLOC_016860      | 0.0723334 | 0.0577972       | -0.323663  | 0.739927  | 1         |
| Pten_j1          | 8.64203   | 6.25964         | -0.465291  | 0.000504  | 0.0081967 |
| Pten_j3          | 0.062088  | 0 -1.79769e+308 |            | 0.0331105 | 1         |
| Pten_j9          | 0.188821  | 0 -1.79769e+308 |            | 0.0003845 | 0.0065665 |
| Lipk_j2          | 0.672537  | 0.333831        | -1.01049   | 0.0584123 | 0.283814  |
| Lipn_j2          | 0.302064  | 1.51851         | 0          | 1         | 1         |
| Stambpl1_j5      | 1.02277   | 0.688939        | 0          | 1         | 1         |
| AK142879_j2      | 0.0718129 | 0.14394         | 1.00315    | 0.27546   | 1         |
| Ifit2_j5         | 0.178132  | 0.18431         | 0          | 1         | 1         |
| Ifit3_j2         | 2.56682   | 0.935798        | 0          | 1         | 1         |
| I830012O16Rik_j2 | 0.454958  | 0.681374        | 0          | 1         | 1         |
| Kif20b_j4        | 0.0960108 | 0.0457557       | -1.06925   | 0.309891  | 1         |
| Kif20b_j3        | 0.122967  | 0.0293324       | -2.0677    | 0.0830482 | 1         |
| Pcgf5            | 0.132441  | 0.220618        | 0          | 1         | 1         |
| Pcgf5_j1         | 0.105091  | 0.000305779     | 0          | 1         | 1         |
| Tnks2_j2         | 0.681333  | 0.035989        | 0          | 1         | 1         |
| Btaf1_j1         | 0.0582075 | 0.0122879       | 0          | 1         | 1         |
| Kif11_j4         | 0.133975  | 0 -1.79769e+308 |            | 1.69E-06  | 1         |
| Kif11_j2         | 0.0883383 | 0.0389317       | -1.18209   | 0.198821  | 1         |
| Cyp26a1_j2       | 0.0573513 | 0 -1.79769e+308 |            | 0.0741758 | 1         |
| Cyp26a1          | 0.278479  | 1.39036         | 2.31982    | 3.34E-11  | 3.75E-09  |
| Cep55_j2         | 0.0652421 | 0.00131812      | -5.62925   | 0.500514  | 1         |
| Cep55_j3         | 0.139874  | 0 -1.79769e+308 |            | 0.0025973 | 0.0307412 |
| Plce1_j5         | 0.0988402 | 0 -1.79769e+308 |            | 5.52E-06  | 1         |
| XLOC_016892      | 0.152229  | 0.169187        | 0.152376   | 0.772058  | 0.922643  |
| Hells_j3         | 0.879837  | 0.385887        | -1.18906   | 2.32E-05  | 0.000626  |
| XLOC_016900      | 0.0768569 | 2.98E-05        | -11.3306   | 0.991344  | 1         |
| XLOC_016900      | 0.153949  | 0.152327        | -0.0152735 | 0.98028   | 0.994006  |
| Ccnj_j5          | 0.139754  | 0 -1.79769e+308 |            | 0.0001418 | 0.0028695 |
| Lcor_j8          | 0.256992  | 0.000700276     | 0          | 1         | 1         |
| AK167556_j2      | 0.107856  | 0.138778        | 0          | 1         | 1         |
| AK167556_j1      | 0.403724  | 1.18827         | 0          | 1         | 1         |
| Ubttd1_j6        | 8.20215   | 9.51125         | 0          | 1         | 1         |
| Ankrd2_j1        | 0.122406  | 0 -1.79769e+308 |            | 0.0576654 | 1         |
| Zfyve27_j2       | 13.9169   | 14.8784         | 0          | 1         | 1         |
| XLOC_016915      | 0.210064  | 0.188888        | -0.153295  | 0.704406  | 0.891915  |
| Scd2_j2          | 27.2261   | 20.2661         | 0          | 1         | 1         |
| Peo1             | 3.56694   | 3.83159         | 0.103257   | 0.520086  | 0.797685  |
| Kazald1_j6       | 0.129324  | 0.0570988       | -1.17946   | 0.374018  | 1         |
| XLOC_016935      | 0.075089  | 0 -1.79769e+308 |            | 0.0083653 | 1         |

|                  |            |                 |            |           |           |
|------------------|------------|-----------------|------------|-----------|-----------|
| Btrc_j3          | 8.5226     | 8.47671         | 0          | 1         | 1         |
| Pprc1_j9         | 0.583198   | 0               | 0          | 1         | 1         |
| Pprc1_j14        | 0.279422   | 0.572458        | 0          | 1         | 1         |
| Gbf1_j4          | 0.227094   | 0 -1.79769e+308 |            | 3.80E-08  | 2.30E-06  |
| Tmem180          | 7.72906    | 8.16039         | 0.0783449  | 0.614625  | 0.847771  |
| Tmem180          | 1.27281    | 1.14171         | -0.15682   | 0.674546  | 0.877234  |
| Sfxn2            | 0.340628   | 0.322757        | -0.0777486 | 0.860089  | 0.955759  |
| Sfxn2_j7         | 0.332073   | 0.295367        | -0.168992  | 0.734701  | 0.906438  |
| 2010012005Rik_j1 | 3.12698    | 2.8273          | -0.145346  | 0.509646  | 0.790813  |
| XLOC_016954      | 0.0639644  | 0.0614403       | 0          | 1         | 1         |
| Pdcd11           | 0.892023   | 0.880016        | 0          | 1         | 1         |
| Gsto2_j4         | 0.0836034  | 0 -1.79769e+308 |            | 0.042589  | 1         |
| Gsto2_j6         | 0.139431   | 0 -1.79769e+308 |            | 0.0211254 | 0.146328  |
| Ccdc147_j3       | 0.238042   | 1.14E-05        | -14.3476   | 0.992424  | 0.997809  |
| Add3             | 0.590285   | 0.344928        | -0.775115  | 0.131554  | 0.451443  |
| Add3_j3          | 0.410693   | 0 -1.79769e+308 |            | 3.20E-06  | 0.0001152 |
| Mxi1             | 0.725059   | 0.317323        | 0          | 1         | 1         |
| XLOC_016974      | 0.130012   | 0.10075         | -0.36787   | 0.580551  | 1         |
| Tcf7l2_j4        | 0.00122947 | 0.118311        | 6.58841    | 0.235929  | 1         |
| Tcf7l2_j10       | 0.257773   | 0.0525695       | -2.2938    | 0.023287  | 0.156388  |
| Tcf7l2_j11       | 0.266263   | 0.0840885       | -1.66287   | 0.0416634 | 0.230288  |
| AK040090         | 0.543179   | 0 -1.79769e+308 |            | 4.97E-06  | 0.000168  |
| Atrnl1_j4        | 0.922473   | 0               | 0          | 1         | 1         |
| XLOC_016995      | 0.438337   | 0.384061        | -0.190705  | 0.803368  | 0.934749  |
| Ppp6r3_j2        | 1.4017     | 1.56854         | 0          | 1         | 1         |
| Ppp6r3           | 2.33444    | 1.89045         | 0          | 1         | 1         |
| Lrp5_j1          | 0.108434   | 0.157482        | 0          | 1         | 1         |
| Tcirg1_j3        | 1.37866    | 1.37672         | 0          | 1         | 1         |
| Aldh3b1_j2       | 0.267777   | 0 -1.79769e+308 |            | 0.0001692 | 0.0033363 |
| Aip_j1           | 1.13714    | 1.1422          | 0          | 1         | 1         |
| Rps6kb2_j1       | 3.86092    | 3.91138         | 0          | 1         | 1         |
| Carns1_j10       | 0.145867   | 0.199661        | 0.452897   | 0.383007  | 0.712839  |
| Carns1_j6        | 0.35111    | 0.356125        | 0.0204572  | 0.956841  | 0.987617  |
| Tbc1d10c_j6      | 0.0469771  | 0.0711336       | 0          | 1         | 1         |
| Ankrd13d_j4      | 0.998485   | 0.129163        | 0          | 1         | 1         |
| Ankrd13d_j11     | 10.9176    | 8.26818         | 0          | 1         | 1         |
| Kdm2a_j4         | 0.343799   | 0.286045        | 0          | 1         | 1         |
| Lrfn4            | 0.883155   | 0.929793        | 0.0742431  | 0.811403  | 0.938053  |
| Rce1_j3          | 3.19759    | 3.32769         | 0.0575353  | 0.82607   | 0.943936  |
| Rce1_j2          | 0.853326   | 0.878005        | 0.0411307  | 0.935572  | 0.980308  |
| Rce1_j4          | 1.65259    | 1.65793         | 0.00466152 | 0.983629  | 0.995188  |
| Bbs1_j2          | 0.224683   | 0.140525        | 0          | 1         | 1         |
| Dpp3_j2          | 6.25034    | 3.93228         | 0          | 1         | 1         |
| Klc2_j2          | 16.0889    | 14.3746         | -0.162545  | 0.0892049 | 0.366237  |
| Sf3b2_j3         | 1.15775    | 0.466694        | 0          | 1         | 1         |
| Sart1_j1         | 0.503409   | 0.363235        | -0.470829  | 0.1559    | 0.489236  |
| Sart1_j3         | 6.28616    | 6.69035         | 0.0899025  | 0.668885  | 0.874727  |

|                  |           |           |               |           |           |
|------------------|-----------|-----------|---------------|-----------|-----------|
| Drap1_j1         | 1.83548   | 1.76657   | -0.055206     | 0.807571  | 0.936621  |
| Drap1_j2         | 5.20566   | 4.19987   | -0.309736     | 0.304507  | 0.650023  |
| Drap1_j4         | 4.31363   | 4.8458    | 0.167833      | 0.496865  | 0.783602  |
| Drap1_j3         | 1.383     | 1.66816   | 0.270455      | 0.53031   | 0.803051  |
| Mus81_j1         | 0.640727  | 0.984777  | 0             | 1         | 1         |
| Snx32_j4         | 31.7766   | 32.712    | 0.0418524     | 0.638759  | 0.860184  |
| Kat5             | 0.296273  | 0.294688  | 0             | 1         | 1         |
| Pcnx13_j1        | 0.159574  | 0.154797  | -0.0438524    | 0.907298  | 0.970702  |
| Pcnx13_j2        | 0.152039  | 0.201145  | 0.403797      | 0.179206  | 0.518821  |
| Ehbp1l1          | 0.96157   | 1.01014   | 0             | 1         | 1         |
| Scyl1_j4         | 0.0602864 | 0.0668156 | 0             | 1         | 1         |
| Dpf2_j4          | 0.3297    | 0         | -1.79769e+308 | 6.99E-06  | 0.0002269 |
| Dpf2_j5          | 2.99123   | 3.13364   | 0.0670992     | 0.691382  | 0.885702  |
| Tm7sf2_j1        | 3.62197   | 4.7361    | 0             | 1         | 1         |
| 1110014N23Rik_j1 | 0.0580561 | 0.0843802 | 0             | 1         | 1         |
| 1110014N23Rik_j4 | 0.39316   | 0.495242  | 0             | 1         | 1         |
| Arl2_j3          | 0.458126  | 0.674132  | 0             | 1         | 1         |
| Ppp2r5b_j6       | 0.688087  | 0.51931   | 0             | 1         | 1         |
| Ccdc88b_j1       | 0.189553  | 0         | -1.79769e+308 | 0.0008622 | 0.0126972 |
| Ccdc88b_j2       | 0.135392  | 0.0983255 | -0.461511     | 0.675348  | 1         |
| Ccdc88b_j9       | 0.147358  | 0.014304  | -3.36484      | 0.139396  | 0.464357  |
| Prdx5_j1         | 187.261   | 181.648   | -0.0439107    | 0.62775   | 0.854913  |
| Kcnk4_j4         | 0.436485  | 0.358755  | 0             | 1         | 1         |
| Plcb3_j2         | 2.3326    | 2.81478   | 0.271083      | 0.0786078 | 0.340034  |
| Plcb3_j3         | 0.231476  | 0.177792  | -0.380674     | 0.375539  | 0.707806  |
| Plcb3_j12        | 6.3114    | 6.97786   | 0.144823      | 0.206939  | 0.551484  |
| Vegfb_j3         | 15.8642   | 13.3587   | -0.247998     | 0.134293  | 0.456076  |
| Otub1_j3         | 35.9532   | 34.2327   | -0.0707423    | 0.415978  | 0.733677  |
| Mark2_j4         | 5.77383   | 8.039     | 0             | 1         | 1         |
| Mark2_j6         | 2.10491   | 1.9516    | 0             | 1         | 1         |
| Mark2_j7         | 1.17488   | 0.747363  | 0             | 1         | 1         |
| Rtn3_j2          | 100.602   | 67.3183   | 0             | 1         | 1         |
| Slc3a2_j2        | 4.84124   | 7.66235   | 0             | 1         | 1         |
| Slc3a2           | 14.0743   | 13.255    | 0             | 1         | 1         |
| Ttc9c            | 8.59571   | 7.93103   | 0             | 1         | 1         |
| Gng3_j2          | 0.642821  | 0.674533  | 0             | 1         | 1         |
| Gng3_j5          | 66.6322   | 84.2393   | 0             | 1         | 1         |
| Rom1             | 1.28502   | 1.11508   | 0             | 1         | 1         |
| Incenp_j2        | 0.501101  | 1.15009   | 0             | 1         | 1         |
| Gm98_j3          | 0.277006  | 0.489651  | 0             | 1         | 1         |
| Sdhaf2_j2        | 2.23429   | 2.25187   | 0             | 1         | 1         |
| Tmem216_j2       | 0.933343  | 1.90866   | 1.03208       | 0.0070832 | 0.0664784 |
| Dak_j1           | 0.186187  | 0         | 0             | 1         | 1         |
| Cd6_j2           | 0.133454  | 0.0034387 | -5.27833      | 0.499635  | 1         |
| Stx3             | 1.05015   | 1.08081   | 0.0415083     | 0.877486  | 0.96086   |
| Stx3_j4          | 0.302632  | 0.332305  | 0.134944      | 0.722149  | 0.900981  |
| Dtx4_j1          | 3.32105   | 3.03675   | 0             | 1         | 1         |

|                  |           |           |               |           |           |
|------------------|-----------|-----------|---------------|-----------|-----------|
| Tle4             | 2.50622   | 2.54275   | 0             | 1         | 1         |
| XLOC_017138      | 0.05873   | 0         | -1.79769e+308 | 0.13067   | 1         |
| XLOC_017144      | 0.0941913 | 0.0580258 | -0.698899     | 0.421286  | 1         |
| XLOC_017144      | 0.165633  | 0.076604  | -1.1125       | 0.124685  | 0.439929  |
| Ostf1_j2         | 58.5903   | 55.2635   | 0             | 1         | 1         |
| Ostf1_j5         | 4.85477   | 3.67102   | 0             | 1         | 1         |
| Mamdc2_j1        | 0.360759  | 0         | -1.79769e+308 | 6.69E-09  | 4.86E-07  |
| Fam189a2_j4      | 1.6342    | 1.28064   | 0             | 1         | 1         |
| Tjp2_j8          | 0.415793  | 0.594134  | 0.514924      | 0.104493  | 0.401025  |
| Fxn_j2           | 1.23543   | 1.48825   | 0.26861       | 0.587533  | 0.835056  |
| Pgm5_j1          | 0.21116   | 0         | -1.79769e+308 | 0.0054215 | 0.0539919 |
| 5033414D02Rik_j4 | 0.101249  | 0.0654844 | -0.628688     | 0.674283  | 1         |
| 9930021J03Rik    | 0.559961  | 0.516829  | 0             | 1         | 1         |
| Gldc_j1          | 0.38296   | 0.164044  | -1.22311      | 0.0210454 | 0.145976  |
| Asah2_j5         | 3.14458   | 2.36632   | -0.410225     | 0.0169877 | 0.125633  |
| Lipo1_j1         | 0.354442  | 0.216303  | -0.712491     | 0.179039  | 0.518638  |
| Slc16a12_j1      | 0.242046  | 0.167271  | -0.533089     | 0.225296  | 0.57244   |
| Cpeb3_j2         | 1.55428   | 0.44577   | 0             | 1         | 1         |
| Cpeb3_j3         | 0.928152  | 0.441171  | 0             | 1         | 1         |
| AK168860         | 0.218123  | 0.179429  | -0.281724     | 0.49304   | 0.78149   |
| 5730455O13Rik_j4 | 0.770118  | 0.117416  | 0             | 1         | 1         |
| Sorbs1_j4        | 1.14885   | 1.1192    | 0             | 1         | 1         |
| Sorbs1_j5        | 0.780271  | 0.173834  | 0             | 1         | 1         |
| Sorbs1_j6        | 2.47494   | 2.15251   | 0             | 1         | 1         |
| Sorbs1_j7        | 2.97084   | 3.01147   | 0             | 1         | 1         |
| Aldh18a1_j3      | 2.17647   | 2.76194   | 0             | 1         | 1         |
| Tll2_j2          | 0.0977675 | 0.0594297 | -0.718171     | 0.509068  | 1         |
| Pik3ap1_j5       | 0.11549   | 0.205008  | 0.827907      | 0.3023    | 0.648402  |
| Mms19_j4         | 1.88313   | 1.82484   | 0             | 1         | 1         |
| Sfrp5_j1         | 45.363    | 39.5019   | -0.199594     | 0.0715108 | 0.321492  |
| Crtac1_j1        | 6.1236    | 9.79537   | 0             | 1         | 1         |
| Pyroxd2_j6       | 0.168489  | 0         | -1.79769e+308 | 0.0003014 | 0.0053603 |
| Pyroxd2_j8       | 0.0574444 | 0         | -1.79769e+308 | 0.0605645 | 1         |
| Hps1_j1          | 0.10723   | 0         | -1.79769e+308 | 0.0017459 | 1         |
| Slc25a28_j2      | 1.90654   | 2.04059   | 0.0980324     | 0.639043  | 0.860252  |
| Dnmbp_j2         | 0.372555  | 0         | -1.79769e+308 | 9.48E-11  | 9.70E-09  |
| Dnmbp_j3         | 0.103412  | 0         | -1.79769e+308 | 1.68E-05  | 1         |
| Cwf19l1_j4       | 0.221487  | 0.0912155 | 0             | 1         | 1         |
| Cwf19l1_j5       | 0.522656  | 0.214264  | 0             | 1         | 1         |
| Bloc1s2_j2       | 0.805699  | 0.869234  | 0             | 1         | 1         |
| Pkd2l1_j1        | 0.0896112 | 0         | -1.79769e+308 | 0.0052344 | 1         |
| XLOC_017247      | 0.429245  | 0.247902  | -0.792032     | 0.142935  | 0.469839  |
| XLOC_017247      | 0.105451  | 0.114025  | 0.112782      | 0.88822   | 1         |
| Poll             | 1.11482   | 1.40462   | 0.333369      | 0.213848  | 0.559016  |
| Fbxw4_j1         | 0.138572  | 0.0817777 | -0.760855     | 0.116316  | 0.424391  |
| Mgea5_j4         | 0.198826  | 0         | 0             | 1         | 1         |
| 9130011E15Rik_j2 | 3.78044   | 4.73966   | 0             | 1         | 1         |

|                  |           |             |              |           |           |
|------------------|-----------|-------------|--------------|-----------|-----------|
| Ldb1_j3          | 0.649958  | 0.250223    | 0            | 1         | 1         |
| Psd_j2           | 0.698933  | 1.13028     | 0.693455     | 0.0007873 | 0.0118342 |
| Psd_j9           | 4.11197   | 4.27922     | 0.0575177    | 0.697984  | 0.888695  |
| 2310034G01Rik    | 0.600846  | 0.810706    | 0.432184     | 0.379523  | 0.710908  |
| Arl3_j2          | 37.9099   | 39.069      | 0.0434488    | 0.724582  | 0.901993  |
| Nt5c2            | 0.390099  | 0.435711    | 0            | 1         | 1         |
| Obfc1            | 4.06417   | 4.50804     | 0.149542     | 0.380253  | 0.711271  |
| Itprjp1_j1       | 0.189474  | 0.208083    | 0.135163     | 0.799356  | 0.933125  |
| Xpnpep1_j1       | 10.8108   | 13.0089     | 0            | 1         | 1         |
| 5830416P10Rik_j3 | 0.0995811 | 0.0375654   | -1.40647     | 0.313287  | 1         |
| 5830416P10Rik_j4 | 0.0358556 | 0.0709045   | 0.983679     | 0.528796  | 1         |
| Gpam_j4          | 11.0919   | 11.5854     | 0            | 1         | 1         |
| Gpam_j3          | 0.118004  | 0.0798565   | 0            | 1         | 1         |
| Gucy2g_j2        | 0.209768  | 0.0962918   | -1.12331     | 0.311609  | 0.656252  |
| Dclre1a          | 0.395339  | 0.606152    | 0.616588     | 0.0465623 | 0.247407  |
| A630007B06Rik_j3 | 0.446017  | 0.00020867  | 0            | 1         | 1         |
| Afap1l2          | 0.535978  | 0.583129    | 0            | 1         | 1         |
| Ablim1_j4        | 17.3972   | 17.8039     | 0            | 1         | 1         |
| Ablim1_j5        | 2.06329   | 1.66137     | 0            | 1         | 1         |
| 4930506M07Rik_j2 | 1.75543   | 1.77326     | 0            | 1         | 1         |
| Rab11fip2_j2     | 0.465775  | 0.195716    | 0            | 1         | 1         |
| D19Ert737e_j2    | 0.682938  | 0.707792    | 0.0515703    | 0.851526  | 0.952852  |
| D19Ert737e_j3    | 0.701559  | 0.646634    | -0.117616    | 0.688231  | 0.884104  |
| 2700078E11Rik_j2 | 7.71456   | 9.13778     | 0            | 1         | 1         |
| Eif3a_j2         | 7.27439   | 7.96998     | 0            | 1         | 1         |
| Eif3a_j3         | 17.0265   | 21.3076     | 0            | 1         | 1         |
| AK039536_j2      | 0.291092  | 0.000204465 | -10.4754     | 0.820139  | 0.941808  |
| Csf2ra_j10       | 0.331116  | 0.629561    | 0.927012     | 0.0670204 | 0.309529  |
| Csf2ra_j13       | 0         | 0.135041    | 1.79769e+308 | 0.0308319 | 1         |
| Mrpl21_j1        | 7.75031   | 8.0801      | 0            | 1         | 1         |
| Cpt1a_j1         | 34.2463   | 29.1094     | 0            | 1         | 1         |
| Unc93b1_j2       | 1.13632   | 3.41852     | 1.58901      | 3.16E-08  | 1.97E-06  |
| Acy3_j2          | 0.247486  | 0.415288    | 0.746763     | 0.252592  | 0.600518  |
| Nudt8            | 0.634536  | 0.632666    | -0.00425898  | 0.991252  | 0.997413  |
| Doc2g_j8         | 0.148896  | 0.136331    | -0.127189    | 0.849655  | 0.952228  |
| Doc2g_j12        | 0         | 0.0560152   | 1.79769e+308 | 0.089896  | 1         |
| Pitpnm1_j4       | 3.49777   | 3.62331     | 0            | 1         | 1         |
| Coro1b_j6        | 0.731035  | 1.4116      | 0            | 1         | 1         |
| Clcf1_j4         | 0.139236  | 0.44773     | 1.6851       | 0.0206064 | 0.143858  |
| Spnb3_j6         | 0.618365  | 1.00957     | 0.707214     | 0.0045461 | 0.0472744 |
| Zdhhc24          | 0.88761   | 0.930353    | 0            | 1         | 1         |
| Rin1_j6          | 0         | 0.151372    | 1.79769e+308 | 0.001527  | 1         |
| XLOC_016731      | 0.271831  | 0.317603    | 0            | 1         | 1         |
| Rnaseh2c_j3      | 13.4235   | 15.6419     | 0            | 1         | 1         |
| Map3k11_j1       | 0.774747  | 1.05265     | 0.442224     | 0.0856747 | 0.357343  |
| Ltbp3_j3         | 4.48546   | 2.48052     | 0            | 1         | 1         |
| Slc25a45_j1      | 0.059404  | 0.117421    | 0.983059     | 0.414166  | 1         |



|                  |           |           |               |           |           |
|------------------|-----------|-----------|---------------|-----------|-----------|
| Syvn1_j3         | 0.178045  | 0.205125  | 0             | 1         | 1         |
| Atg2a_j1         | 0.341449  | 0.371415  | 0.121362      | 0.728834  | 0.903836  |
| XLOC_016750      | 0.0450018 | 0.0753414 | 0.74346       | 0.485728  | 1         |
| Men1             | 0.465927  | 0.355014  | -0.392227     | 0.503973  | 0.787321  |
| Map4k2_j1        | 5.86054   | 5.09811   | 0             | 1         | 1         |
| Sf1_j2           | 11.6512   | 11.4561   | 0             | 1         | 1         |
| Rasgrp2_j3       | 0.106372  | 0.197001  | 0.889085      | 0.215086  | 0.560764  |
| Rasgrp2_j8       | 5.126     | 2.94012   | -0.801957     | 0.0084586 | 0.0756432 |
| Nrxn2_j3         | 2.71477   | 2.37126   | -0.195181     | 0.257006  | 0.605813  |
| Nrxn2_j5         | 9.12358   | 10.5497   | 0.209536      | 0.194767  | 0.537206  |
| Nxf1_j6          | 4.75662   | 5.80061   | 0             | 1         | 1         |
| Nxf1_j2          | 3.96034   | 5.13671   | 0             | 1         | 1         |
| Bsc12            | 36.6351   | 40.7009   | 0             | 1         | 1         |
| Lrrn4cl          | 0.102701  | 0.171954  | 0.743567      | 0.259354  | 0.608037  |
| Ganab_j1         | 0.063413  | 0.0451528 | 0             | 1         | 1         |
| Ganab_j6         | 0         | 0.724841  | 0             | 1         | 1         |
| B3gat3_j1        | 47.1294   | 49.4753   | 0             | 1         | 1         |
| B3gat3_j2        | 7.36289   | 11.6807   | 0             | 1         | 1         |
| Eml3_j4          | 0.0766326 | 0.0708297 | 0             | 1         | 1         |
| Eef1g_j2         | 3.89123   | 3.85077   | -0.0150787    | 0.912306  | 0.972389  |
| Eef1g_j8         | 0.460771  | 0.325228  | -0.502596     | 0.0857969 | 0.357639  |
| Syt7             | 4.59394   | 5.88378   | 0             | 1         | 1         |
| Slc15a3          | 0.461555  | 1.19192   | 0             | 1         | 1         |
| XLOC_016800      | 0         | 0.0909435 | 1.79769e+308  | 0.0832456 | 1         |
| AK044380_j1      | 0.213646  | 0.161899  | -0.400125     | 0.625992  | 0.854009  |
| XLOC_016817      | 0.213546  | 0.265094  | 0.311957      | 0.674545  | 0.877234  |
| XLOC_016818      | 0.0752562 | 0.0803826 | 0.0950743     | 0.926341  | 1         |
| XLOC_016821      | 0.021006  | 0.0969528 | 2.20648       | 0.278457  | 1         |
| Gnaq_j3          | 4.59592   | 3.5783    | 0             | 1         | 1         |
| XLOC_016824      | 0.0238105 | 0.117869  | 2.30752       | 0.212586  | 1         |
| Prune2_j3        | 8.09357   | 9.25927   | 0.194122      | 0.039857  | 0.223368  |
| Prune2_j9        | 0.130146  | 1.58302   | 3.60448       | 1.10E-11  | 1.33E-09  |
| 2410127L17Rik_j2 | 1.5101    | 1.61913   | 0             | 1         | 1         |
| Trpm6_j2         | 0.0246507 | 0.0471537 | 0.935742      | 0.53239   | 1         |
| Zfand5_j1        | 2.66582   | 4.01042   | 0             | 1         | 1         |
| Fam108b_j2       | 1.37      | 1.53727   | 0             | 1         | 1         |
| Trpm3_j4         | 0.463855  | 0.263201  | 0             | 1         | 1         |
| Kank1_j4         | 0.957661  | 0.551784  | 0             | 1         | 1         |
| Kank1_j6         | 0.36773   | 0.980925  | 0             | 1         | 1         |
| Kank1_j8         | 1.01668   | 0.580776  | 0             | 1         | 1         |
| Cdc37l1_j1       | 10.9291   | 9.62923   | 0             | 1         | 1         |
| Il33             | 0         | 0.344333  | 1.79769e+308  | 0.0001151 | 0.0024236 |
| Uhrf2_j2         | 0.103591  | 0.215028  | 1.05363       | 0.125832  | 0.441688  |
| Pten_j2          | 6.50138   | 5.96763   | -0.123589     | 0.269667  | 0.618744  |
| Pten_j5          | 0.153149  | 0         | -1.79769e+308 | 3.14E-07  | 1.48E-05  |
| AK142879         | 1.19E-05  | 0.0571414 | 12.2338       | 0.986525  | 1         |
| Kif20b_j9        | 0.0562821 | 0.147553  | 1.39048       | 0.342933  | 1         |

|                  |             |            |              |           |           |
|------------------|-------------|------------|--------------|-----------|-----------|
| Rpp30_j1         | 0           | 0.466923   | 1.79769e+308 | 0.0172482 | 0.127058  |
| Rpp30_j2         | 0.606164    | 0.522723   | -0.213661    | 0.767211  | 0.920598  |
| Btaf1_j3         | 0.9342      | 1.33058    | 0            | 1         | 1         |
| Exoc6_j2         | 0.227874    | 1.17453    | 0            | 1         | 1         |
| Cyp26a1_j1       | 0.0552832   | 0.249019   | 2.17135      | 0.0447427 | 0.241634  |
| Cep55_j1         | 0.019099    | 0.12765    | 2.74063      | 0.060339  | 1         |
| Plce1_j4         | 0.0214869   | 0.0656865  | 1.61214      | 0.0692663 | 1         |
| Hells_j5         | 7.95E-05    | 0.443056   | 12.4442      | 0.773317  | 0.923105  |
| Hells_j6         | 0.167401    | 0.172139   | 0.0402662    | 0.950157  | 0.985614  |
| XLOC_016894      | 0.146398    | 0.393659   | 1.42705      | 1         | 1         |
| XLOC_016896      | 0.0380639   | 0.126791   | 1.73595      | 0.496852  | 1         |
| XLOC_016900      | 0.0471575   | 0.11063    | 1.23018      | 0.235018  | 1         |
| Ccnj_j4          | 0           | 0.169833   | 1.79769e+308 | 0.0016805 | 0.0217149 |
| Zfp518a_j1       | 0           | 0.243157   | 0            | 1         | 1         |
| Lcor_j2          | 0.000510155 | 0.15866    | 0            | 1         | 1         |
| Lcor_j3          | 1.00226     | 0.809085   | 0            | 1         | 1         |
| Lcor_j9          | 0.61509     | 1.21858    | 0            | 1         | 1         |
| XLOC_016913      | 0.0263252   | 0.0783248  | 0            | 1         | 1         |
| Golga7b_j1       | 0           | 1.49256    | 0            | 1         | 1         |
| Cutc             | 1.34019     | 1.50992    | 0.17203      | 0.539598  | 0.808476  |
| Cutc_j1          | 0.345503    | 0.2784     | -0.311539    | 0.692339  | 0.886113  |
| Scd2_j5          | 3.63541     | 5.36772    | 0            | 1         | 1         |
| Scd2_j6          | 61.9132     | 108.326    | 0            | 1         | 1         |
| Fam178a_j4       | 1.01091     | 1.03995    | 0            | 1         | 1         |
| Peo1             | 0.171122    | 0.209484   | 0.291816     | 0.511741  | 0.79169   |
| Sfxn3_j2         | 22.8963     | 21.8472    | 0            | 1         | 1         |
| XLOC_016935      | 0.166651    | 0.353808   | 1.08614      | 0.0491521 | 0.25559   |
| XLOC_016941      | 0.0873902   | 0.179821   | 0            | 1         | 1         |
| Pprc1_j10        | 0.0719032   | 0.0994157  | 0            | 1         | 1         |
| Tmem180_j2       | 0           | 0.53665    | 1.79769e+308 | 0.0022171 | 0.0270497 |
| Trim8_j1         | 6.93212     | 7.70688    | 0.152851     | 0.239869  | 0.587219  |
| As3mt_j2         | 0.29599     | 0.31669    | 0.0975229    | 0.891234  | 0.965646  |
| Cnm2_j1          | 0.0572597   | 0.0511458  | 0            | 1         | 1         |
| Neurl1a_j1       | 1.90471     | 1.60365    | 0            | 1         | 1         |
| Slk_j6           | 1.07484     | 0.217689   | 0            | 1         | 1         |
| Gsto2_j5         | 0           | 0.265265   | 1.79769e+308 | 0.0160183 | 0.120474  |
| Add3_j1          | 0           | 0.286866   | 1.79769e+308 | 0.0030695 | 0.0350695 |
| Mxi1_j3          | 5.40641     | 6.47852    | 0            | 1         | 1         |
| XLOC_016971      | 0.221721    | 0.279013   | 0.331588     | 0.531236  | 0.803433  |
| Tcf7l2_j9        | 0.0385751   | 0.237849   | 2.62431      | 0.0020669 | 0.025641  |
| Tcf7l2_j6        | 0.136365    | 0.11494    | -0.246595    | 0.710772  | 1         |
| Tcf7l2_j8        | 0           | 0.0512503  | 1.79769e+308 | 0.0440559 | 1         |
| Tcf7l2_j7        | 0.0736729   | 0.00149189 | -5.62592     | 0.309511  | 1         |
| AK040090_j1      | 0.177       | 0.135904   | -0.381169    | 0.668008  | 0.874424  |
| 1700011F14Rik_j4 | 0.228271    | 0.524612   | 1.2005       | 0.0001426 | 0.0028835 |
| Pnliprp2         | 0.0735169   | 0.672416   | 3.19321      | 2.62E-06  | 9.61E-05  |
| XLOC_016995      | 4.35975     | 4.47327    | 0.0370842    | 0.852193  | 0.953098  |

|             |           |           |              |           |           |
|-------------|-----------|-----------|--------------|-----------|-----------|
| XLOC_017001 | 0.426315  | 0.323848  | -0.396602    | 0.514965  | 0.793855  |
| Ighmbp2_j2  | 2.15078   | 2.02085   | 0            | 1         | 1         |
| Lrp5_j3     | 0.0623978 | 0.183608  | 0            | 1         | 1         |
| Tcirg1_j4   | 0.102902  | 0.133441  | 0            | 1         | 1         |
| Tcirg1_j5   | 1.27599   | 2.19067   | 0            | 1         | 1         |
| Ndufs8_j1   | 46.1857   | 43.6452   | 0            | 1         | 1         |
| Carns1_j8   | 0.202601  | 0.802978  | 1.98672      | 2.47E-06  | 9.16E-05  |
| Carns1_j9   | 0.081978  | 0.146502  | 0.837615     | 0.187301  | 1         |
| Tbc1d10c_j5 | 0         | 0.0965745 | 0            | 1         | 1         |
| Rad9_j3     | 1.08449   | 1.30056   | 0            | 1         | 1         |
| Ankrd13d_j1 | 3.45725   | 4.14953   | 0            | 1         | 1         |
| Adrbk1_j3   | 0.533894  | 1.06975   | 0            | 1         | 1         |
| Adrbk1_j4   | 0.595242  | 0.419563  | 0            | 1         | 1         |
| Actn3       | 0.254273  | 0.263544  | 0.0516644    | 0.905548  | 0.969961  |
| Klc2_j3     | 12.4684   | 10.3706   | -0.265781    | 0.0087095 | 0.0773047 |
| Pacs1_j2    | 4.41539   | 5.35592   | 0.278591     | 0.124475  | 0.439692  |
| Sf3b2_j1    | 2.19427   | 0.795263  | 0            | 1         | 1         |
| Drap1_j5    | 39.8446   | 52.032    | 0.385015     | 0.0340109 | 0.201923  |
| Ctsw_j2     | 0.110839  | 0.159676  | 0.526676     | 0.467257  | 0.766636  |
| Ctsw_j1     | 0.0966971 | 0.117276  | 0.278358     | 0.725927  | 1         |
| Snx32_j3    | 0.295506  | 0.453119  | 0.616703     | 0.147664  | 0.476304  |
| Pcnxl3_j3   | 0.0442146 | 0.0783427 | 0.825275     | 0.19145   | 1         |
| Scyl1_j5    | 0.77366   | 0.440846  | 0            | 1         | 1         |
| Capn1       | 41.0045   | 41.6294   | 0            | 1         | 1         |
| Ppp2r5b_j5  | 0.382799  | 0.408443  | 0            | 1         | 1         |
| Ccdc88b_j10 | 0.0271765 | 0.0814645 | 1.58381      | 0.47922   | 1         |
| Kcnk4_j1    | 1.523     | 1.73065   | 0            | 1         | 1         |
| Gpr137_j1   | 6.68367   | 6.50229   | -0.039692    | 0.751105  | 0.913736  |
| Plcb3_j7    | 2.33489   | 1.57336   | -0.569508    | 0.0014045 | 0.0187498 |
| Plcb3_j8    | 0.623862  | 0.68483   | 0.134517     | 0.540292  | 0.808817  |
| Plcb3       | 61.0508   | 55.0467   | -0.149354    | 0.0848517 | 0.355554  |
| Vegfb_j1    | 0.441932  | 0.198869  | -1.15201     | 0.405127  | 0.726964  |
| Naa40_j2    | 0         | 0.798664  | 1.79769e+308 | 6.03E-08  | 3.48E-06  |
| Polr2g_j3   | 28.7968   | 37.6991   | 0            | 1         | 1         |
| Best1_j2    | 0.124787  | 0.0544669 | 0            | 1         | 1         |
| Best1_j4    | 0.282237  | 0.255713  | 0            | 1         | 1         |
| Gm98_j7     | 0.341808  | 0.580691  | 0            | 1         | 1         |
| Dagla_j1    | 2.39851   | 2.41025   | 0            | 1         | 1         |
| Stx3_j2     | 0.636632  | 0.776079  | 0.285742     | 0.231003  | 0.57801   |
| Tle4_j2     | 0.588649  | 0.651591  | 0            | 1         | 1         |
| XLOC_017138 | 0         | 0.0475405 | 1.79769e+308 | 0.170407  | 1         |
| XLOC_017144 | 0.113488  | 0.0406359 | -1.48171     | 0.178379  | 1         |
| Anxa1_j1    | 1.45789   | 6.25912   | 0            | 1         | 1         |
| AK089615_j2 | 0.134427  | 0.181607  | 0.433998     | 0.564629  | 0.823408  |
| Smc5        | 0.434201  | 0.322242  | 0            | 1         | 1         |
| Tjp2_j1     | 0         | 0.0804155 | 1.79769e+308 | 0.009952  | 1         |
| Rfx3_j1     | 0.077755  | 0.0576432 | -0.431784    | 0.75769   | 1         |

|                   |             |                       |             |           |           |
|-------------------|-------------|-----------------------|-------------|-----------|-----------|
| Glis3_j4          | 0.0633631   | 0.261473              | 2.04494     | 0.0004962 | 0.0080897 |
| Glis3_j6          | 0.0934619   | 0.252232              | 1.4323      | 0.0010202 | 0.0145269 |
| Glis3_j5          | 0.0124456   | 0.0710447             | 2.5131      | 0.033415  | 1         |
| 5033414D02Rik_j2  | 0.00337915  | 0.227535              | 6.07328     | 0.31923   | 0.662595  |
| Ermp1_j3          | 2.58483     | 3.4245                | 0.405824    | 0.0760255 | 0.333002  |
| Ermp1_j4          | 0.130667    | 0 -1.79769e+308       |             | 3.53E-05  | 1         |
| 9930021J03Rik_j10 | 0           | 0.109894              | 0           | 1         | 1         |
| Asah2_j7          | 0.197644    | 0.0494921             | -1.99764    | 0.017937  | 0.130623  |
| Sgms1_j5          | 0.532369    | 0.424861              | 0           | 1         | 1         |
| Sgms1_j4          | 0.0146725   | 0.270149              | 0           | 1         | 1         |
| Lipo1_j4          | 0.649465    | 1.19172               | 0.875718    | 0.0040021 | 0.0428983 |
| Lipo2_j3          | 1.22941     | 1.80478               | 0.553864    | 0.0240065 | 0.15981   |
| Lipa              | 3.92739     | 4.37946               | 0           | 1         | 1         |
| Ankrd1            | 0.0683605   | 0.433207              | 2.66382     | 3.39E-07  | 1.58E-05  |
| Ide_j4            | 2.66409     | 3.20559               | 0           | 1         | 1         |
| Myof_j5           | 0.0474567   | 0.0327846             | -0.533594   | 0.722907  | 1         |
| Myof_j4           | 0           | 0.109556 1.79769e+308 |             | 0.0098238 | 1         |
| 5730455O13Rik_j1  | 0.349175    | 0.428812              | 0           | 1         | 1         |
| Sorbs1_j13        | 0.452662    | 3.43484               | 0           | 1         | 1         |
| Sorbs1_j14        | 6.00677     | 5.58343               | 0           | 1         | 1         |
| Sorbs1_j16        | 1.31765     | 0.51816               | 0           | 1         | 1         |
| Blnk              | 0.396608    | 0.674666              | 0.766458    | 0.0336429 | 0.200495  |
| Tm9sf3_j1         | 4.67267     | 9.53365               | 0           | 1         | 1         |
| Pik3ap1           | 0.158224    | 0.435497              | 1.46069     | 0.0001078 | 0.0022968 |
| Arhgap19_j1       | 0.000971146 | 0.343462              | 0           | 1         | 1         |
| Mms19             | 12.2776     | 12.1864               | 0           | 1         | 1         |
| Pyroxd2_j1        | 0           | 0.100786 1.79769e+308 |             | 0.0631452 | 1         |
| Pyroxd2_j2        | 0.037388    | 0.166903              | 2.15836     | 0.0703171 | 0.318545  |
| Pyroxd2_j10       | 0.0786932   | 0.104179              | 0.404757    | 0.813619  | 1         |
| Hps1_j9           | 0.695376    | 0.793937              | 0.191231    | 0.632673  | 0.857248  |
| Hps1_j10          | 0.0288768   | 0.350333              | 3.60074     | 0.0007946 | 0.0119243 |
| Hps1_j11          | 0.0845576   | 0.478869              | 2.50163     | 2.98E-07  | 1.42E-05  |
| Slc25a28_j3       | 2.87546     | 3.00473               | 0.0634391   | 0.838947  | 0.948659  |
| Dnmbp_j4          | 0           | 0.214594 1.79769e+308 |             | 1.34E-05  | 0.0003995 |
| Chuk_j3           | 1.73735     | 1.93287               | 0.153856    | 0.502581  | 0.786557  |
| Chuk_j4           | 0.687776    | 0.683519              | -0.00895813 | 0.978281  | 0.993756  |
| Cwf19l1_j6        | 1.30431     | 1.47854               | 0           | 1         | 1         |
| Bloc1s2_j5        | 0.0486109   | 0.102765              | 0           | 1         | 1         |
| Sec31b_j7         | 0.0785624   | 0.0731391             | -0.103196   | 0.916185  | 1         |
| Sec31b_j8         | 0.0416963   | 0.185812              | 2.15585     | 0.0074827 | 0.0692411 |
| Ndufb8_j2         | 4.22218     | 3.88627               | 0           | 1         | 1         |
| Ndufb8_j3         | 67.6763     | 65.1385               | 0           | 1         | 1         |
| Pdzd7_j2          | 0.768871    | 0.847485              | 0.140446    | 0.630294  | 0.856283  |
| Mgea5_j2          | 1.28946     | 1.42992               | 0           | 1         | 1         |
| 9130011E15Rik_j3  | 7.29673     | 6.55858               | 0           | 1         | 1         |
| Ldb1_j5           | 9.51837     | 9.08278               | 0           | 1         | 1         |
| Psd_j6            | 0.0593578   | 0.0716386             | 0.2713      | 0.738271  | 1         |

|                  |           |                        |              |           |           |
|------------------|-----------|------------------------|--------------|-----------|-----------|
| Psd_j7           | 5.72634   | 5.25324                | -0.124408    | 0.320607  | 0.663843  |
| Pcgf6_j1         | 0.960109  | 0.492026               | -0.964465    | 0.01777   | 0.129725  |
| Obfc1_j2         | 1.6221    | 1.66767                | 0.0399709    | 0.873763  | 0.959888  |
| Sorcs1_j5        | 1.27518   | 1.21294                | 0            | 1         | 1         |
| Smndc1_j2        | 0.273235  | 0.437641               | 0.679605     | 0.226378  | 0.573555  |
| 5830416P10Rik_j2 | 0         | 0.0573754 1.79769e+308 |              | 0.0906139 | 1         |
| Gucy2g_j3        | 0.0525225 | 0.0727119              | 0.469256     | 0.756008  | 1         |
| Afap1l2_j4       | 0         | 0.364708               | 0            | 1         | 1         |
| XLOC_017291      | 0         | 0.0629618 1.79769e+308 |              | 0.0720108 | 1         |
| GDNFR-alpha_j1   | 0.0546668 | 0.556022               | 0            | 1         | 1         |
| GDNFR-alpha_j2   | 0.104323  | 0.24169                | 0            | 1         | 1         |
| GDNFR-alpha_j3   | 0.447786  | 0.264254               | 0            | 1         | 1         |
| 1700019N19Rik    | 0.104232  | 0.230218               | 1.1432       | 0.0997002 | 0.390914  |
| Hspa12a_j1       | 43.2483   | 39.4202                | 0            | 1         | 1         |
| Pdzd8_j1         | 11.7113   | 10.1979                | 0            | 1         | 1         |
| Csf2ra_j15       | 0.511662  | 0.661256               | 0.370019     | 0.353097  | 0.689667  |
| Csf2ra_j14       | 0.489283  | 0.634101               | 0.374042     | 0.402831  | 0.726002  |
| Cpt1a_j4         | 4.20611   | 5.23992                | 0            | 1         | 1         |
| XLOC_016695      | 0.111143  | 0.104578               | -0.087832    | 0.912266  | 1         |
| Suv420h1_j3      | 3.86309   | 4.12492                | 0.094614     | 0.441379  | 0.750188  |
| Clcf1_j2         | 0.0394561 | 0.283183               | 2.84342      | 0.122464  | 0.435588  |
| Clcf1_j5         | 0         | 0.334809 1.79769e+308  |              | 0.002619  | 0.0309461 |
| XLOC_016711      | 0.0717265 | 0.0974918              | 0            | 1         | 1         |
| Fosl1_j2         | 0         | 0.397547               | 0            | 1         | 1         |
| Fosl1_j1         | 2.85292   | 3.18674                | 0            | 1         | 1         |
| Fosl1_j3         | 3.02543   | 3.04648                | 0            | 1         | 1         |
| Ltbp3_j8         | 1.94594   | 2.09171                | 0            | 1         | 1         |
| Cdc42bpg_j3      | 0.035487  | 0.0651274              | 0.875974     | 0.294178  | 1         |
| Cdc42bpg_j10     | 0         | 0.0721464 1.79769e+308 |              | 0.0570997 | 1         |
| Pygm_j1          | 0         | 0.079741 1.79769e+308  |              | 0.021857  | 1         |
| Rasgrp2_j7       | 0.740299  | 0.329412               | -1.16821     | 0.0056663 | 0.0558933 |
| XLOC_016767      | 0.582419  | 0.316427               | -0.880183    | 0.656155  | 0.868853  |
| Stx5a_j2         | 5.56843   | 8.88215                | 0            | 1         | 1         |
| Zbtb3_j1         | 0         | 0.0587071 1.79769e+308 |              | 0.083088  | 1         |
| 1810009A15Rik_j2 | 0.221704  | 0.315663               | 0            | 1         | 1         |
| Ganab            | 18.7736   | 17.9114                | 0            | 1         | 1         |
| Ganab_j5         | 2.35103   | 1.56488                | 0            | 1         | 1         |
| Eml3_j5          | 0.362075  | 0.375357               | 0            | 1         | 1         |
| Eef1g_j3         | 0.692366  | 1.07236                | 0.63118      | 0.0126808 | 0.102195  |
| Syt7_j3          | 0.97322   | 1.57081                | 0            | 1         | 1         |
| Cpsf7            | 7.77226   | 7.05639                | 0            | 1         | 1         |
| Osbp_j3          | 10.4822   | 10.6046                | 0            | 1         | 1         |
| XLOC_016818      | 0.0865084 | 0.0864486              | -0.000998579 | 0.999282  | 1         |
| Gnaq_j1          | 1.63416   | 0.715139               | 0            | 1         | 1         |
| Rfk_j2           | 13.4067   | 8.31916                | 0            | 1         | 1         |
| Trpm6_j4         | 0.376321  | 0.439448               | 0.223729     | 0.671154  | 0.87565   |
| Aldh1a1_j6       | 0         | 0.300516 1.79769e+308  |              | 0.0012088 | 0.0166392 |

|                  |            |           |              |           |           |
|------------------|------------|-----------|--------------|-----------|-----------|
| Tmem2_j5         | 1.8746     | 2.46543   | 0            | 1         | 1         |
| Klf9_j1          | 9.61827    | 7.54205   | 0            | 1         | 1         |
| Ptar1_j1         | 0          | 0.0697419 | 1.79769e+308 | 0.0005057 | 1         |
| Dock8_j5         | 0.338868   | 0.348184  | 0            | 1         | 1         |
| Kank1_j7         | 0.66378    | 0.927466  | 0            | 1         | 1         |
| Smarca2_j1       | 3.06779    | 2.67671   | -0.196738    | 0.184013  | 0.524679  |
| Smarca2_j2       | 1.33697    | 1.91015   | 0.514722     | 0.004683  | 0.0483055 |
| Smarca2_j5       | 11.603     | 10.7431   | -0.111088    | 0.298371  | 0.64496   |
| Slc1a1_j1        | 0          | 0.084181  | 1.79769e+308 | 0.017313  | 1         |
| AK028012         | 0.11417    | 0.0975167 | -0.227459    | 0.887999  | 1         |
| Jak2_j1          | 0.597121   | 1.03598   | 0            | 1         | 1         |
| C030046E11Rik_j2 | 0.0435609  | 0.0535224 | 0.297107     | 0.727432  | 1         |
| 2700046G09Rik_j1 | 0.476185   | 0.599912  | 0.333231     | 0.58084   | 0.831827  |
| XLOC_016866      | 0.0691408  | 0.144016  | 1.05862      | 0.187173  | 1         |
| Pten_j7          | 31.7421    | 27.3864   | -0.212936    | 0.014797  | 0.113779  |
| Stambpl1_j1      | 2.08841    | 1.63005   | 0            | 1         | 1         |
| Stambpl1_j4      | 1.13974    | 0.410959  | 0            | 1         | 1         |
| Fas_j2           | 0.0922245  | 0.178871  | 0.9557       | 0.285149  | 0.633925  |
| Kif20b_j6        | 0          | 0.0959433 | 1.79769e+308 | 0.0263032 | 1         |
| Kif20b_j7        | 0.064997   | 0.04799   | -0.437641    | 0.723285  | 1         |
| XLOC_016879      | 0.228917   | 0.108235  | 0            | 1         | 1         |
| Hectd2_j1        | 0.0593396  | 0.0545158 | -0.122322    | 0.897698  | 1         |
| Hectd2_j2        | 0.0282168  | 0.0761476 | 1.43224      | 0.178691  | 1         |
| Tnks2_j1         | 0          | 0.0771104 | 0            | 1         | 1         |
| Btaf1_j4         | 0.421574   | 0.697075  | 0            | 1         | 1         |
| Kif11_j6         | 0          | 0.134172  | 1.79769e+308 | 0.0650553 | 1         |
| Kif11_j9         | 0.292652   | 0.137238  | -1.09251     | 0.10192   | 0.395606  |
| Kif11_j11        | 0.0768397  | 0.116182  | 0.596464     | 0.6025    | 1         |
| Exoc6_j1         | 0.419868   | 0.744402  | 0            | 1         | 1         |
| Lgi1_j2          | 18.6074    | 15.9899   | -0.218711    | 0.0236252 | 0.157919  |
| Tbc1d12_j3       | 2.86286    | 2.75301   | -0.0564479   | 0.737099  | 0.907482  |
| Hells_j2         | 0.31449    | 0.355131  | 0.17534      | 0.722296  | 0.90111   |
| Hells_j7         | 0.322648   | 0.131937  | -1.29011     | 0.085652  | 0.357343  |
| Ccnj_j3          | 0          | 0.0665339 | 1.79769e+308 | 0.0359811 | 1         |
| Zfp518a_j5       | 0          | 0.0671354 | 0            | 1         | 1         |
| Zdhhc16_j2       | 1.54966    | 1.48564   | 0            | 1         | 1         |
| Zdhhc16_j1       | 2.89402    | 3.58115   | 0            | 1         | 1         |
| Ubtd1_j3         | 0          | 0.0794682 | 0            | 1         | 1         |
| D19Ert386e_j1    | 2.422      | 2.3846    | -0.022451    | 0.906311  | 0.970331  |
| Scd2_j3          | 96.377     | 127.733   | 0            | 1         | 1         |
| Fam178a_j1       | 0.0169793  | 0.0874307 | 0            | 1         | 1         |
| Kazald1_j2       | 9.76E-05   | 0.542427  | 12.4401      | 0.945657  | 0.983787  |
| XLOC_016935      | 0.241108   | 0.249767  | 0.0509065    | 0.909258  | 0.971287  |
| XLOC_016935      | 0.271181   | 0.207168  | -0.388455    | 0.490781  | 0.780098  |
| XLOC_016936      | 0.00571577 | 0.0744412 | 3.70308      | 0.174982  | 1         |
| Pprc1_j15        | 0.189756   | 0.075682  | 0            | 1         | 1         |
| Gbf1_j5          | 8.17094    | 7.47513   | -0.128404    | 0.380807  | 0.711587  |

|                  |           |           |              |           |           |
|------------------|-----------|-----------|--------------|-----------|-----------|
| Tmem180_j1       | 3.03325   | 3.67551   | 0.277079     | 0.249785  | 0.597201  |
| Trim8_j2         | 1.97774   | 3.07209   | 0.635369     | 0.11921   | 0.429562  |
| Sfxn2_j5         | 0.0541182 | 0.0558193 | 0.0446503    | 0.969786  | 1         |
| Sfxn2_j4         | 0         | 0.0713875 | 1.79769e+308 | 0.0417158 | 1         |
| D19Wsu162e       | 0.145575  | 1.53362   | 0            | 1         | 1         |
| D19Wsu162e_j1    | 3.30588   | 4.39442   | 0            | 1         | 1         |
| Neurl1a_j2       | 0.431872  | 0.414767  | 0            | 1         | 1         |
| Slk_j3           | 1.92676   | 2.43953   | 0            | 1         | 1         |
| Gsto2_j2         | 0         | 0.122265  | 1.79769e+308 | 0.077206  | 1         |
| Ccdc147_j1       | 0.0523874 | 0.0838589 | 0.678745     | 0.547487  | 1         |
| AA387883         | 0.12706   | 0.286557  | 1.17331      | 0.0304936 | 0.187759  |
| Add3_j4          | 0.0521575 | 0.968215  | 4.21438      | 2.15E-05  | 0.0005877 |
| XLOC_016971      | 0.0452827 | 0.148511  | 1.71354      | 0.226448  | 1         |
| Acs5_j1          | 21.8716   | 24.1066   | 0.140366     | 0.169131  | 0.505835  |
| AK040090_j5      | 0.223564  | 0.337104  | 0.592509     | 0.347767  | 0.686337  |
| AK040090_j7      | 0.178785  | 0.995991  | 2.4779       | 0.0002203 | 0.0041522 |
| Atrnl1_j1        | 10.7966   | 10.1075   | 0            | 1         | 1         |
| Atrnl1_j6        | 0         | 0.258151  | 0            | 1         | 1         |
| Gm16277_j1       | 12.6228   | 28.5927   | 0            | 1         | 1         |
| XLOC_016991      | 0.0185341 | 0.0971117 | 2.38946      | 0.408771  | 1         |
| 1700011F14Rik_j6 | 0.985283  | 0.946419  | -0.0580588   | 0.844271  | 0.950736  |
| 1700011F14Rik_j7 | 2.02762   | 2.11413   | 0.0602763    | 0.677426  | 0.878715  |
| Kcnk18_j1        | 0.203145  | 0.587708  | 1.53259      | 5.02E-08  | 2.95E-06  |
| XLOC_017001      | 1.12759   | 1.19891   | 0.0884749    | 0.83168   | 0.945808  |
| Ppp6r3_j8        | 0         | 0.255831  | 0            | 1         | 1         |
| Tcirg1_j6        | 0.770581  | 1.06411   | 0            | 1         | 1         |
| Rps6kb2_j3       | 0.900209  | 1.40394   | 0            | 1         | 1         |
| Ankrd13d_j5      | 0.846909  | 4.07027   | 0            | 1         | 1         |
| Syt12_j1         | 3.30238   | 3.05941   | -0.110252    | 0.585192  | 0.833935  |
| XLOC_017026      | 0.140665  | 0.170104  | 0.274156     | 0.775767  | 0.924037  |
| AK134945_j1      | 0.07686   | 0.124358  | 0.694191     | 0.488012  | 1         |
| Rbm4_j3          | 1.35022   | 1.33743   | 0            | 1         | 1         |
| Rbm4_j2          | 1.91078   | 2.20088   | 0            | 1         | 1         |
| Bbs1_j3          | 0         | 0.181462  | 0            | 1         | 1         |
| Peli3_j2         | 1.127     | 0.783705  | -0.524103    | 0.0713623 | 0.32118   |
| Tmem151a_j1      | 0.201096  | 0.283933  | 0.497661     | 0.590149  | 0.836402  |
| Tmem151a_j1      | 82.9463   | 82.1224   | -0.0144005   | 0.8678    | 0.958158  |
| Cnih2            | 7.86878   | 7.32834   | -0.102652    | 0.558375  | 0.820094  |
| Klc2_j5          | 10.1048   | 13.2895   | 0.395242     | 0.0027579 | 0.0322439 |
| Pacs1_j3         | 0.109233  | 0.607949  | 2.47654      | 0.0029971 | 0.0343962 |
| Sf3b2            | 2.74092   | 3.83901   | 0            | 1         | 1         |
| Banf1_j2         | 20.173    | 30.1378   | 0.579149     | 0.0001268 | 0.0026163 |
| Mus81_j2         | 0.302827  | 0.462277  | 0            | 1         | 1         |
| Kat5             | 10.0554   | 9.60219   | 0            | 1         | 1         |
| Pcnx13_j7        | 6.01151   | 6.42191   | 0.0952741    | 0.409915  | 0.730017  |
| Sssca1_j3        | 0.303183  | 0.589662  | 0            | 1         | 1         |
| Scyl1_j3         | 7.54357   | 6.905     | 0            | 1         | 1         |

|                  |            |           |              |           |           |
|------------------|------------|-----------|--------------|-----------|-----------|
| Dpf2_j3          | 0.233031   | 1.59825   | 2.77789      | 9.14E-10  | 7.68E-08  |
| Pola2_j3         | 0.175944   | 0.32437   | 0            | 1         | 1         |
| Capn1_j1         | 0.20864    | 0.328974  | 0            | 1         | 1         |
| Arl2_j2          | 18.0237    | 14.7655   | 0            | 1         | 1         |
| Ppp2r5b_j1       | 19.4136    | 22.142    | 0            | 1         | 1         |
| Ccdc88b_j7       | 0          | 0.113319  | 1.79769e+308 | 0.0031342 | 1         |
| Esrra_j4         | 24.8403    | 24.2733   | -0.0333096   | 0.715594  | 0.897263  |
| Plcb3_j9         | 7.08927    | 11.1651   | 0.655291     | 5.65E-08  | 3.29E-06  |
| Plcb3_j10        | 6.40512    | 6.09963   | -0.0705029   | 0.563674  | 0.822792  |
| Plcb3_j11        | 0.3192     | 0.427846  | 0.422631     | 0.26869   | 0.617595  |
| Vegfb_j8         | 0.0538788  | 0.16602   | 1.62357      | 0.112348  | 0.417177  |
| Vegfb_j9         | 0          | 0.0494238 | 1.79769e+308 | 0.0190274 | 1         |
| Naa40_j7         | 1.1105     | 1.33329   | 0.263788     | 0.302188  | 0.648314  |
| Naa40_j8         | 0.308218   | 0.307049  | -0.00548214  | 0.990957  | 0.99726   |
| Mark2_j3         | 0.177119   | 0.19989   | 0            | 1         | 1         |
| Polr2g_j1        | 22.2683    | 27.1974   | 0            | 1         | 1         |
| Gng3_j1          | 0          | 0.0931712 | 0            | 1         | 1         |
| Sdhaf2_j3        | 1.88252    | 1.98389   | 0            | 1         | 1         |
| Tmem132a_j1      | 2.38309    | 2.87044   | 0            | 1         | 1         |
| Ms4a14_j1        | 0.170016   | 0.232079  | 0.448944     | 0.285108  | 0.633894  |
| A330040F15Rik_j1 | 0          | 0.0907712 | 1.79769e+308 | 0.0434996 | 1         |
| Tle4_j5          | 6.94228    | 6.01149   | 0            | 1         | 1         |
| XLOC_017138      | 0.180649   | 0.229673  | 0.346396     | 0.625869  | 0.854009  |
| Vps13a_j1        | 0.31755    | 0.370069  | 0.220813     | 0.464557  | 0.764829  |
| Vps13a_j3        | 5.80259    | 4.60789   | -0.332592    | 0.103212  | 0.398287  |
| Ostf1_j1         | 0.22077    | 0.623534  | 0            | 1         | 1         |
| Ostf1_j3         | 1.6047     | 0.904083  | 0            | 1         | 1         |
| Ostf1_j4         | 2.09704    | 1.31096   | 0            | 1         | 1         |
| Ostf1_j9         | 58.2378    | 61.8738   | 0            | 1         | 1         |
| Smc5_j3          | 0.150526   | 0.456658  | 0            | 1         | 1         |
| Tjp2_j4          | 0.267707   | 0.287786  | 0.104344     | 0.800541  | 0.93355   |
| D19Bwg1357e_j1   | 1.1504     | 1.71544   | 0.576442     | 0.0265209 | 0.17117   |
| 4430402118Rik_j5 | 0.0628031  | 0.0199364 | -1.65543     | 0.477306  | 1         |
| 5033414D02Rik_j1 | 4.27691    | 3.29693   | -0.375445    | 0.0873697 | 0.361658  |
| Ermp1_j2         | 2.0004     | 2.01066   | 0.00738065   | 0.973989  | 0.992504  |
| 9930021J03Rik_j6 | 0.00913448 | 0.159819  | 0            | 1         | 1         |
| Prkg1_j1         | 7.60044    | 6.32908   | 0            | 1         | 1         |
| Prkg1_j7         | 0.199338   | 0.892345  | 2.16238      | 0.0012329 | 0.0168983 |
| Asah2_j4         | 0.618165   | 0.539649  | -0.195972    | 0.509382  | 0.790813  |
| Lipo1_j2         | 4.92886    | 4.66606   | -0.0790491   | 0.700175  | 0.8896    |
| Lipo2_j1         | 0.265436   | 0.456767  | 0.783097     | 0.110151  | 0.412969  |
| Gm14446_j1       | 0.088296   | 0.13014   | 0            | 1         | 1         |
| Slc16a12_j3      | 0          | 0.0896322 | 1.79769e+308 | 0.0023325 | 1         |
| Pank1            | 1.49298    | 1.41957   | -0.0727445   | 0.66309   | 0.872404  |
| Ppp1r3c_j1       | 0.287887   | 0.442029  | 0.618638     | 0.138368  | 0.462545  |
| Cpeb3_j1         | 0.209062   | 1.13378   | 0            | 1         | 1         |
| Ide_j3           | 3.94187    | 5.18559   | 0            | 1         | 1         |



|                  |            |           |              |           |           |
|------------------|------------|-----------|--------------|-----------|-----------|
| Myof_j6          | 0.0535568  | 0.0906313 | 0.75894      | 0.583804  | 1         |
| 5730455013Rik_j2 | 0.348601   | 0.178077  | 0            | 1         | 1         |
| Sorbs1_j10       | 2.58498    | 3.28002   | 0            | 1         | 1         |
| Sorbs1_j9        | 2.24056    | 6.25269   | 0            | 1         | 1         |
| Sorbs1_j11       | 6.89509    | 6.96324   | 0            | 1         | 1         |
| Aldh18a1_j5      | 3.51612    | 3.91986   | 0            | 1         | 1         |
| Tctn3_j2         | 0.117231   | 0.289093  | 1.30218      | 0.0097384 | 0.0839896 |
| Tctn3_j3         | 1.52068    | 1.19117   | -0.352337    | 0.248804  | 0.596346  |
| Slit1_j8         | 6.56721    | 10.7777   | 0            | 1         | 1         |
| Arhgap19_j4      | 0.91637    | 1.66032   | 0            | 1         | 1         |
| Loxl4_j2         | 0.165997   | 0.270817  | 0.70616      | 0.189052  | 0.530662  |
| Pyroxd2_j4       | 0          | 0.0535608 | 1.79769e+308 | 0.0707259 | 1         |
| Pyroxd2          | 0.0607585  | 0.0956622 | 0.654863     | 0.493317  | 1         |
| Dnmbp_j5         | 0          | 0.0908294 | 1.79769e+308 | 0.0126775 | 1         |
| Cpn1_j1          | 0.967917   | 1.32496   | 0.452996     | 0.261202  | 0.610374  |
| Chuk_j5          | 1.07416    | 1.38311   | 0.364704     | 0.256594  | 0.605481  |
| Bloc1s2_j4       | 0.300554   | 1.05041   | 0            | 1         | 1         |
| Bloc1s2_j6       | 0.046175   | 0.0610181 | 0            | 1         | 1         |
| Ndufb8_j1        | 42.6885    | 39.2616   | 0            | 1         | 1         |
| Pdzd7_j3         | 0.00100278 | 0.342001  | 8.41386      | 0.327147  | 0.670083  |
| Npm3_j3          | 0.218981   | 0.27664   | 0            | 1         | 1         |
| Mgea5_j3         | 11.2775    | 10.0131   | 0            | 1         | 1         |
| Ldb1_j4          | 10.2399    | 11.1753   | 0            | 1         | 1         |
| Cuedc2           | 11.9225    | 13.4329   | 0.172081     | 0.300088  | 0.646692  |
| Actr1a_j1        | 102.196    | 105.756   | 0            | 1         | 1         |
| Pcgf6_j3         | 0.0537569  | 0.139789  | 1.37873      | 0.127217  | 1         |
| Sh3pxd2a_j3      | 0          | 0.30859   | 0            | 1         | 1         |
| XLOC_017274      | 0.0590879  | 0.110349  | 0.901135     | 0.592641  | 1         |
| Gpam_j6          | 0.344204   | 0.476322  | 0            | 1         | 1         |
| Ablim1_j3        | 0.259951   | 0.189627  | 0            | 1         | 1         |
| AK045643_j3      | 0.0857651  | 0.2678    | 0            | 1         | 1         |
| AK045643_j4      | 0.193548   | 0.313176  | 0            | 1         | 1         |
| Hspa12a          | 9.19499    | 6.93684   | 0            | 1         | 1         |
| Rab11fip2_j4     | 3.56296    | 2.7835    | 0            | 1         | 1         |
| Rab11fip2_j5     | 1.61593    | 1.87493   | 0            | 1         | 1         |
| Rab11fip2_j6     | 0.0957805  | 0.0542965 | 0            | 1         | 1         |
| Eif3a_j4         | 0          | 0.160582  | 0            | 1         | 1         |
| AK039536_j4      | 1.23874    | 2.05904   | 0.733107     | 0.0038411 | 0.0416791 |
| Csf2ra_j3        | 0.117529   | 0.113171  | -0.0545138   | 0.939745  | 1         |
| Csf2ra_j1        | 0.397228   | 0.613317  | 0.626665     | 0.0620837 | 0.294919  |
| Csf2ra_j2        | 0          | 0.0853287 | 1.79769e+308 | 0.0160698 | 1         |
| Mtl5_j1          | 0          | 0.0711263 | 1.79769e+308 | 0.134973  | 1         |
| Suv420h1_j1      | 0.526654   | 0.45937   | -0.1972      | 0.474561  | 0.770688  |
| Chka_j3          | 7.80916    | 11.6347   | 0            | 1         | 1         |
| Unc93b1_j1       | 0.994684   | 0.665395  | -0.580028    | 0.139219  | 0.463926  |
| Doc2g_j2         | 1.02925    | 1.14043   | 0.147982     | 0.545005  | 0.811904  |
| Doc2g_j7         | 0.12433    | 0.221118  | 0.830642     | 0.0977925 | 0.38642   |

|                  |             |                        |            |           |           |
|------------------|-------------|------------------------|------------|-----------|-----------|
| Ppp1ca_j3        | 0           | 0.132916               | 0          | 1         | 1         |
| Clcf1            | 0.0704627   | 0.0017503              | -5.33119   | 0.481572  | 1         |
| XLOC_016710      | 0.0890957   | 0.197055               | 1.14517    | 0.314032  | 0.658298  |
| Gal3st3_j1       | 0           | 0.0582221 1.79769e+308 |            | 0.110711  | 1         |
| Rela_j4          | 11.0311     | 15.8194                | 0.520127   | 3.89E-06  | 0.0001361 |
| Kcnk7_j1         | 0           | 0.100591 1.79769e+308  |            | 0.0790902 | 1         |
| Ltbp3_j6         | 11.6881     | 9.49767                | 0          | 1         | 1         |
| Slc25a45_j2      | 0.170771    | 0.243794               | 0.513599   | 0.419025  | 0.735751  |
| Syvn1_j2         | 4.10707     | 2.45753                | 0          | 1         | 1         |
| Syvn1            | 1.70609     | 1.48197                | 0          | 1         | 1         |
| Cdca5            | 0.145868    | 0.265866               | 0.866038   | 0.0665002 | 0.30809   |
| Naaladl1_j2      | 0.18879     | 0.310024               | 0.715596   | 0.146392  | 0.474685  |
| Atg2a_j2         | 0.845856    | 0.797996               | -0.0840306 | 0.73488   | 0.906496  |
| Cdc42bpg_j8      | 0.0358259   | 0.0598829              | 0.741142   | 0.491371  | 1         |
| Men1             | 2.08285     | 2.2809                 | 0.131041   | 0.611878  | 0.847155  |
| Sf1_j3           | 0           | 0.364202               | 0          | 1         | 1         |
| Nrxn2_j1         | 0.467797    | 0.311766               | -0.585417  | 0.138308  | 0.462436  |
| Ppp1r14b_j1      | 2.65742     | 3.96408                | 0.576958   | 0.0255118 | 0.166622  |
| Ppp1r14b_j3      | 0.150986    | 0.127767               | -0.240898  | 0.869456  | 0.958459  |
| XLOC_016767      | 0           | 0.182621 1.79769e+308  |            | 0.25311   | 0.601131  |
| 1810009A15Rik_j1 | 0.824476    | 1.14712                | 0          | 1         | 1         |
| Ganab_j10        | 15.1098     | 15.9505                | 0          | 1         | 1         |
| Eef1g_j4         | 3.50893     | 3.39039                | -0.0495805 | 0.844798  | 0.950919  |
| Eef1g_j7         | 0.241694    | 0.331107               | 0.454118   | 0.146716  | 0.475075  |
| Rab3il1_j2       | 0           | 0.052004 1.79769e+308  |            | 0.103561  | 1         |
| 1810006K21Rik_j1 | 29.7889     | 36.1722                | 0.28011    | 0.137573  | 0.461343  |
| Cybasc3_j1       | 1.63978     | 2.44035                | 0.573588   | 0.0162674 | 0.121888  |
| Vps37c_j3        | 4.94978     | 3.03759                | -0.704435  | 0.0358492 | 0.208909  |
| Slc15a3_j1       | 0.000677546 | 0.340746               | 0          | 1         | 1         |
| Slc15a3_j3       | 0.00767652  | 0.104412               | 0          | 1         | 1         |
| Ms4a4b           | 0.0276372   | 0.173088               | 2.64682    | 0.127029  | 0.444014  |
| Glyat_j2         | 0.12703     | 0.466395               | 1.87638    | 0.007817  | 0.0713725 |
| XLOC_016813      | 0.0196742   | 0.05318                | 1.43458    | 0.56697   | 1         |
| Gnaq_j2          | 5.72689     | 5.94492                | 0          | 1         | 1         |
| Prune2_j6        | 1.30014     | 2.358                  | 0.858892   | 0.0004634 | 0.0076457 |
| 2410127L17Rik_j3 | 4.97852     | 5.59832                | 0          | 1         | 1         |
| Trpm6_j1         | 7.89E-06    | 0.063387               | 12.9723    | 0.984761  | 1         |
| Aldh1a1_j3       | 0           | 0.158567 1.79769e+308  |            | 0.01203   | 0.0983906 |
| Zfand5_j6        | 16.4001     | 15.9074                | 0          | 1         | 1         |
| Trpm3_j5         | 0           | 0.580708               | 0          | 1         | 1         |
| Trpm3_j7         | 0           | 0.0634291              | 0          | 1         | 1         |
| XLOC_016839      | 0.177717    | 0.157485               | 0          | 1         | 1         |
| Dock8_j1         | 0.242965    | 0.143001               | 0          | 1         | 1         |
| Dock8_j3         | 0.239269    | 0.164587               | 0          | 1         | 1         |
| Dock8_j6         | 0.0142908   | 0.225346               | 0          | 1         | 1         |
| Smarca2_j8       | 0           | 0.974107 1.79769e+308  |            | 2.66E-05  | 0.0006975 |
| Vldlr_j9         | 2.43153     | 1.81279                | 0          | 1         | 1         |

|                  |             |           |              |           |           |
|------------------|-------------|-----------|--------------|-----------|-----------|
| AK028012_j1      | 0.106142    | 0.405865  | 1.935        | 0.207551  | 0.55198   |
| Rcl1_j1          | 0.00538961  | 0.561399  | 6.7027       | 0.0547326 | 0.272957  |
| Cd274_j1         | 0.405627    | 0.227902  | -0.831743    | 0.0395629 | 0.222296  |
| C030046E11Rik_j3 | 0.70197     | 1.1373    | 0.696126     | 0.0037684 | 0.0411078 |
| Pten_j4          | 0.234226    | 0.120753  | -0.955841    | 0.0465452 | 0.247393  |
| Lipn_j3          | 0           | 1.62482   | 0            | 1         | 1         |
| Ifit2_j4         | 0           | 0.136172  | 0            | 1         | 1         |
| Kif20b_j2        | 0           | 0.105811  | 1.79769e+308 | 0.00631   | 1         |
| Rpp30_j3         | 0.567274    | 0.78867   | 0.475376     | 0.434625  | 0.745734  |
| Hectd2_j4        | 0           | 0.115938  | 1.79769e+308 | 0.007132  | 1         |
| March5_j1        | 21.4089     | 22.4591   | 0            | 1         | 1         |
| Kif11_j7         | 0           | 0.0833172 | 1.79769e+308 | 0.0204058 | 1         |
| Kif11_j10        | 0           | 0.0782027 | 1.79769e+308 | 0.0366324 | 1         |
| Exoc6_j3         | 1.99669     | 2.94912   | 0            | 1         | 1         |
| XLOC_016887      | 0.0854615   | 0.121635  | 0.509216     | 0.559072  | 1         |
| Lgi1_j1          | 3.40632     | 4.14553   | 0.283344     | 0.304703  | 0.65013   |
| Plce1_j3         | 1.12279     | 1.10026   | -0.0292451   | 0.862124  | 0.956374  |
| Plce1_j7         | 2.49872     | 2.70686   | 0.115433     | 0.427784  | 0.741888  |
| Hells_j4         | 0           | 0.0509722 | 1.79769e+308 | 0.0822944 | 1         |
| XLOC_016894      | 0.0306018   | 0.100488  | 1.71534      | 0.404448  | 1         |
| Entpd1_j1        | 1.84639     | 1.55412   | 0            | 1         | 1         |
| Zfp518a_j4       | 0.120707    | 0.107207  | 0            | 1         | 1         |
| Zfp518a_j6       | 0.195952    | 0.31223   | 0            | 1         | 1         |
| Zdhhc16_j3       | 2.14042     | 2.42132   | 0            | 1         | 1         |
| Ubt1_j2          | 0           | 0.468799  | 0            | 1         | 1         |
| XLOC_016915      | 0           | 0.103372  | 0            | 1         | 1         |
| D19Ert386e_j2    | 1.86938     | 2.33567   | 0.321281     | 0.129586  | 0.448468  |
| Fam178a_j2       | 0.0536661   | 0.230723  | 0            | 1         | 1         |
| Sema4g_j4        | 0.236714    | 0.404691  | 0            | 1         | 1         |
| Sema4g_j3        | 1.18408     | 0.99672   | 0            | 1         | 1         |
| Sema4g_j1        | 0.784387    | 0.334688  | 0            | 1         | 1         |
| Sema4g_j2        | 3.12E-05    | 0.262024  | 0            | 1         | 1         |
| Kazald1_j5       | 0.739108    | 0.223129  | -1.72791     | 0.0607082 | 0.290452  |
| XLOC_016935      | 0.312867    | 0.215902  | -0.535175    | 0.18486   | 0.525128  |
| Btrc_j4          | 0           | 0.0562576 | 0            | 1         | 1         |
| Pprc1_j2         | 0.000153282 | 0.312259  | 0            | 1         | 1         |
| Pprc1_j7         | 1.28968     | 1.55047   | 0            | 1         | 1         |
| Pprc1_j12        | 0.92229     | 1.79384   | 0            | 1         | 1         |
| Gbf1_j7          | 22.1593     | 23.1693   | 0.0643046    | 0.573251  | 0.827482  |
| Sufu_j2          | 0.790031    | 1.18176   | 0            | 1         | 1         |
| Sfxn2_j3         | 0.317692    | 0.359687  | 0.179116     | 0.852005  | 0.952976  |
| Pdcd11_j3        | 1.66976     | 2.4512    | 0            | 1         | 1         |
| Slk_j1           | 0.784897    | 1.96443   | 0            | 1         | 1         |
| Slk_j5           | 1.16452     | 2.07961   | 0            | 1         | 1         |
| 6330577E15Rik_j1 | 4.42598     | 5.54894   | 0            | 1         | 1         |
| Gsto1_j1         | 24.3772     | 23.1305   | -0.0757381   | 0.560864  | 0.821348  |
| Ccdc147_j2       | 0.0121355   | 0.0565702 | 2.22081      | 0.318211  | 1         |

|                  |             |           |              |           |           |
|------------------|-------------|-----------|--------------|-----------|-----------|
| XLOC_016966      | 0.0450072   | 0.241927  | 2.42635      | 0.0068965 | 0.0650796 |
| Dusp5_j1         | 3.25179     | 3.19837   | 0            | 1         | 1         |
| XLOC_016971      | 0.188512    | 0.17213   | -0.131154    | 0.819813  | 0.941608  |
| Rbm20_j1         | 0.116993    | 0.073314  | -0.674258    | 0.442053  | 1         |
| Shoc2            | 25.5989     | 24.5534   | -0.0601565   | 0.509673  | 0.790813  |
| Tcf7l2_j13       | 0.00115944  | 0.07793   | 6.07068      | 0.378871  | 1         |
| AK040090_j4      | 0           | 0.500574  | 1.79769e+308 | 0.0009425 | 0.0136359 |
| Atrnl1_j3        | 0.687277    | 0.377482  | 0            | 1         | 1         |
| XLOC_016991      | 0.130717    | 0.149455  | 0.193271     | 0.84113   | 1         |
| 1700011F14Rik_j1 | 0.094887    | 0.473864  | 2.32019      | 0.0005352 | 0.0086354 |
| Pnliprp2_j1      | 1.22E-06    | 0.0666171 | 15.7383      | 0.998704  | 1         |
| XLOC_016995      | 0           | 0.128339  | 1.79769e+308 | 0.0907945 | 1         |
| Fam45a_j1        | 12.1877     | 11.5798   | -0.0738199   | 0.547551  | 0.813761  |
| XLOC_017001      | 0           | 0.0473055 | 1.79769e+308 | 0.280976  | 1         |
| Ighmbp2_j3       | 0.998666    | 0.675151  | 0            | 1         | 1         |
| Gal_j1           | 25.4182     | 111.844   | 2.13756      | 0         | 0         |
| Ppp6r3_j4        | 1.57282     | 2.72859   | 0            | 1         | 1         |
| Tcirg1_j2        | 0.0960106   | 0.292193  | 0            | 1         | 1         |
| Carns1_j7        | 0.442217    | 0.400401  | -0.143306    | 0.692429  | 0.886124  |
| Tbc1d10c         | 0           | 0.0840288 | 0            | 1         | 1         |
| Rad9_j2          | 3.28477     | 3.62342   | 0            | 1         | 1         |
| Ankrd13d_j6      | 6.00549     | 3.88106   | 0            | 1         | 1         |
| Kdm2a_j1         | 2.19025     | 2.49734   | 0            | 1         | 1         |
| AK134945_j2      | 0.0672585   | 0.090872  | 0.434118     | 0.751283  | 1         |
| Bbs1             | 0.554967    | 0.944344  | 0            | 1         | 1         |
| Dpp3_j4          | 0.000991018 | 3.18484   | 0            | 1         | 1         |
| XLOC_017036      | 0.0801409   | 0.146279  | 0.868109     | 0.362286  | 1         |
| Tmem151a_j2      | 0.0414266   | 0.153289  | 1.88762      | 0.295782  | 1         |
| Sart1_j2         | 8.29661     | 10.3313   | 0.316424     | 0.0369273 | 0.212724  |
| Snx32_j1         | 0.828944    | 1.01515   | 0.292342     | 0.156134  | 0.489534  |
| Kat5             | 3.88774     | 3.60843   | 0            | 1         | 1         |
| Sipa1_j1         | 0.461826    | 0.583866  | 0.338288     | 0.367061  | 0.700519  |
| Sipa1            | 0.224971    | 0.28117   | 0.321707     | 0.467051  | 0.766531  |
| Sipa1_j2         | 0           | 0.255133  | 1.79769e+308 | 0.0002443 | 0.0045319 |
| Sipa1_j3         | 0.29711     | 0.503351  | 0.760566     | 0.053476  | 0.269225  |
| Pcnxl3_j11       | 0.310947    | 0.459571  | 0.563616     | 0.11424   | 0.420612  |
| Ehbp1l1_j1       | 0.196236    | 0.37563   | 0            | 1         | 1         |
| Scyl1_j2         | 10.521      | 13.1173   | 0            | 1         | 1         |
| Pola2_j1         | 0.321415    | 0.358128  | 0            | 1         | 1         |
| Pola2_j5         | 0.0682705   | 0.0612846 | 0            | 1         | 1         |
| Capn1_j2         | 16.1275     | 20.8394   | 0            | 1         | 1         |
| 1110014N23Rik_j3 | 5.41032     | 6.00753   | 0            | 1         | 1         |
| Ppp2r5b_j4       | 2.76815     | 4.94175   | 0            | 1         | 1         |
| Rps6ka4_j1       | 5.19132     | 5.37338   | 0            | 1         | 1         |
| Ccdc88b_j3       | 0           | 0.190763  | 1.79769e+308 | 0.0231115 | 0.155673  |
| Ccdc88b_j5       | 0.0771044   | 0.144494  | 0.906124     | 0.26497   | 1         |
| Ccdc88b_j6       | 0.0300128   | 0.107275  | 1.83766      | 0.0236028 | 1         |

|                  |            |           |              |           |           |
|------------------|------------|-----------|--------------|-----------|-----------|
| Kcnk4_j6         | 2.13727    | 2.53325   | 0            | 1         | 1         |
| Kcnk4_j7         | 1.16596    | 1.8418    | 0            | 1         | 1         |
| Gpr137           | 42.9826    | 42.4657   | -0.0174517   | 0.855421  | 0.954239  |
| Fkbp2_j2         | 7.33566    | 7.34164   | 0.00117539   | 0.996106  | 0.998923  |
| Vegfb_j10        | 0          | 0.11842   | 1.79769e+308 | 0.189517  | 1         |
| Vegfb_j11        | 0.0883354  | 0.329469  | 1.89908      | 0.142376  | 0.469059  |
| Vegfb_j13        | 0.635533   | 0.523114  | -0.28084     | 0.296807  | 0.643452  |
| Vegfb_j12        | 0.190885   | 0.149279  | -0.354691    | 0.453667  | 0.758165  |
| Otub1_j2         | 22.2496    | 22.7411   | 0.0315182    | 0.777453  | 0.924734  |
| Naa40_j5         | 0.0695114  | 0.282885  | 2.0249       | 0.0059272 | 0.0579278 |
| Mark2_j5         | 8.99569    | 9.33024   | 0            | 1         | 1         |
| Rtn3_j3          | 2.86949    | 4.5358    | 0            | 1         | 1         |
| Polr2g_j2        | 19.0521    | 18.7044   | 0            | 1         | 1         |
| Best1_j5         | 0.391743   | 0.160331  | 0            | 1         | 1         |
| Fen1_j1          | 1.43975    | 1.2736    | -0.176912    | 0.535666  | 0.80631   |
| Gm98_j5          | 8.25E-05   | 0.266711  | 0            | 1         | 1         |
| Dak_j4           | 1.14588    | 1.64751   | 0            | 1         | 1         |
| Ms4a14_j2        | 0.0151818  | 0.0755903 | 2.31586      | 0.364179  | 1         |
| A330040F15Rik_j3 | 0          | 0.0974962 | 1.79769e+308 | 0.0340371 | 1         |
| A330040F15Rik_j2 | 0.0979258  | 0.102818  | 0.0703311    | 0.94152   | 1         |
| Zfp91_j2         | 8.23874    | 8.35889   | 0            | 1         | 1         |
| XLOC_017139      | 0.00983003 | 0.164772  | 4.06713      | 0.276998  | 0.626059  |
| AK089615_j1      | 0.00433102 | 0.0618925 | 3.83698      | 0.403361  | 1         |
| Mamdc2_j2        | 1.32914    | 1.14772   | -0.211715    | 0.4545    | 0.758678  |
| Pip5k1b_j3       | 2.86115    | 4.47706   | 0.645957     | 7.95E-05  | 0.0017655 |
| Glis3_j1         | 0          | 0.116004  | 1.79769e+308 | 0.0028225 | 1         |
| 9930021J03Rik_j2 | 0.0300547  | 0.0617617 | 0            | 1         | 1         |
| 9930021J03Rik_j1 | 0.0562458  | 0.0989067 | 0            | 1         | 1         |
| Asah2_j3         | 0.0719692  | 0.201655  | 1.48644      | 0.0157904 | 0.1192    |
| Sgms1_j2         | 1.7346     | 1.58091   | 0            | 1         | 1         |
| Lipo1_j3         | 0.708866   | 1.20088   | 0.760511     | 0.061593  | 0.293296  |
| Lipa_j1          | 4.32962    | 5.00478   | 0            | 1         | 1         |
| Gm14446          | 0.764626   | 1.03197   | 0            | 1         | 1         |
| Slc16a12         | 0          | 0.238506  | 1.79769e+308 | 3.31E-06  | 0.0001185 |
| Htr7_j2          | 0.253513   | 0.447754  | 0            | 1         | 1         |
| Cpeb3_j5         | 0.4983     | 0         | 0            | 1         | 1         |
| Cpeb3            | 0.677593   | 0.733109  | 0            | 1         | 1         |
| Ide_j2           | 8.84516    | 8.04385   | 0            | 1         | 1         |
| Noc3l_j1         | 2.70981    | 2.9134    | 0.104512     | 0.511055  | 0.791357  |
| Sorbs1_j1        | 3.98302    | 0         | 0            | 1         | 1         |
| Sorbs1_j2        | 0.685307   | 0.424488  | 0            | 1         | 1         |
| Sorbs1_j3        | 2.93494    | 2.98326   | 0            | 1         | 1         |
| Aldh18a1_j4      | 0.0738836  | 0.233112  | 0            | 1         | 1         |
| Pik3ap1_j1       | 0.188909   | 0.421399  | 1.1575       | 0.0225646 | 0.153205  |
| Pik3ap1_j3       | 0.140785   | 0.150292  | 0.0942799    | 0.863137  | 0.956634  |
| Pik3ap1_j2       | 0          | 0.131752  | 1.79769e+308 | 0.0011953 | 1         |
| Rrp12_j2         | 1.67193    | 2.04474   | 0.29041      | 0.069346  | 0.315721  |

|                  |           |                        |            |           |           |
|------------------|-----------|------------------------|------------|-----------|-----------|
| Mms19_j3         | 14.6637   | 18.0905                | 0          | 1         | 1         |
| Avpi1_j2         | 6.78031   | 10.007                 | 0          | 1         | 1         |
| Hps1_j7          | 0.170107  | 0 -1.79769e+308        | 0.0001363  | 0.002774  |           |
| Cox15_j1         | 0         | 0.0907433 1.79769e+308 | 0.0007769  | 1         |           |
| Dnmbp_j6         | 0         | 0.216267 1.79769e+308  | 1.65E-05   | 0.0004734 |           |
| Erlin1_j1        | 0         | 0.935764               | 0          | 1         | 1         |
| Pkd2l1_j2        | 0         | 0.0657637 1.79769e+308 | 0.102753   | 1         |           |
| Pkd2l1_j3        | 0.0090072 | 0.152974               | 4.08607    | 0.131516  | 1         |
| XLOC_017240      | 0.0440104 | 0.179681               | 0          | 1         | 1         |
| Scd1_j1          | 47.3402   | 66.4668                | 0          | 1         | 1         |
| XLOC_017248      | 0.150503  | 0.289076               | 0.941656   | 0.491971  | 0.780786  |
| Fbxw4_j3         | 2.3793    | 3.22584                | 0.439137   | 0.218802  | 0.565038  |
| Fbxw4_j4         | 3.70075   | 4.15372                | 0.166583   | 0.412453  | 0.731438  |
| 9130011E15Rik_j1 | 0.0596513 | 0.135298               | 0          | 1         | 1         |
| Ldb1_j2          | 0         | 0.393051               | 0          | 1         | 1         |
| Psd_j1           | 0.468143  | 0.37353                | -0.325725  | 0.261633  | 0.610795  |
| Actr1a_j2        | 55.4677   | 66.3268                | 0          | 1         | 1         |
| Arl3_j1          | 0         | 0.642652 1.79769e+308  | 0.0040548  | 0.0433306 |           |
| Pcgf6_j2         | 0.0468837 | 0.407241               | 3.11873    | 0.0034067 | 0.0381007 |
| Pcgf6            | 0.477547  | 1.13498                | 1.24895    | 0.0007562 | 0.0114442 |
| Sorcs1_j1        | 1.20557   | 1.43947                | 0          | 1         | 1         |
| XLOC_017270      | 0.570583  | 0.647221               | 0.181823   | 0.746649  | 0.911752  |
| Afap1l2_j3       | 4.04839   | 5.8201                 | 0          | 1         | 1         |
| XLOC_017290      | 0.210596  | 0.217878               | 0.0490386  | 0.933551  | 0.979831  |
| GDNFR-alpha_j4   | 1.63979   | 8.54961                | 0          | 1         | 1         |
| 4930506M07Rik_j1 | 2.04819   | 1.42798                | 0          | 1         | 1         |
| Csf2ra_j8        | 0.0534266 | 0.0647533              | 0.277396   | 0.850318  | 1         |
| Csf2ra_j7        | 0.391873  | 0.561952               | 0.520063   | 0.275962  | 0.624922  |
| Csf2ra_j9        | 0.378774  | 0.461779               | 0.285866   | 0.563552  | 0.822689  |
| Fam171a1         | 9.42598   | 8.02888                | 0          | 1         | 1         |
| Fam171a1         | 2.28103   | 2.07643                | 0          | 1         | 1         |
| Nmt2             | 5.52127   | 5.02019                | 0          | 1         | 1         |
| Dclre1c          | 1.16285   | 0.777329               | 0          | 1         | 1         |
| Cdnf_j2          | 0.289222  | 0.0757807              | -1.93228   | 0.0082349 | 0.0742319 |
| Cdnf             | 1.33556   | 1.07593                | -0.31186   | 0.135318  | 0.457656  |
| Fam107b          | 8.51015   | 7.07674                | 0          | 1         | 1         |
| Fam107b_j3       | 0.997765  | 0                      | 0          | 1         | 1         |
| Frmd4a_j2        | 1.11928   | 1.104                  | 0          | 1         | 1         |
| Frmd4a_j1        | 0.634478  | 0.506822               | 0          | 1         | 1         |
| Frmd4a_j7        | 5.30522   | 5.02696                | 0          | 1         | 1         |
| Bend7_j1         | 0.0533378 | 0 -1.79769e+308        | 0.0106549  | 1         |           |
| Bend7            | 0.221599  | 0.0024331              | -6.50901   | 0.126218  | 0.442417  |
| Bend7_j5         | 0.334881  | 0.115712               | -1.53311   | 0.0444281 | 0.240435  |
| Sephs1           | 3.00154   | 2.92738                | -0.036093  | 0.801222  | 0.933726  |
| Sephs1_j3        | 0.188861  | 0 -1.79769e+308        | 0.0020191  | 0.0251765 |           |
| Phyh             | 27.9064   | 26.7515                | -0.0609735 | 0.539479  | 0.808383  |
| Ccdc3            | 0.366732  | 0.837952               | 1.19214    | 6.89E-06  | 0.0002242 |

|             |           |                 |            |           |           |
|-------------|-----------|-----------------|------------|-----------|-----------|
| Upf2        | 2.25867   | 2.25551         | 0          | 1         | 1         |
| Upf2_j4     | 1.1983    | 1.12278         | 0          | 1         | 1         |
| Usp6nl      | 2.10084   | 1.56206         | 0          | 1         | 1         |
| Usp6nl_j2   | 0.202707  | 0.0516734       | 0          | 1         | 1         |
| Itih5       | 8.8715    | 8.06374         | -0.137729  | 0.148541  | 0.477406  |
| Sfmbt2_j1   | 0.13572   | 0.024668        | -2.45992   | 0.0949373 | 1         |
| Prkcq       | 6.34151   | 4.27838         | 0          | 1         | 1         |
| Prkcq_j1    | 1.16042   | 0.709485        | 0          | 1         | 1         |
| Prkcq_j4    | 2.5466    | 2.81019         | 0          | 1         | 1         |
| Il15ra      | 0.438435  | 0 -1.79769e+308 |            | 7.25E-08  | 4.08E-06  |
| Il15ra_j1   | 0.434695  | 0.481132        | 0.146428   | 0.732862  | 0.905765  |
| Il15ra_j4   | 0.250619  | 0.243632        | -0.0407957 | 0.963362  | 0.989786  |
| Il15ra_j6   | 0.0248427 | 0.111625        | 2.16776    | 0.250209  | 1         |
| Ankrd16_j6  | 0.490578  | 0.410411        | 0          | 1         | 1         |
| Ankrd16_j5  | 0.235324  | 0.14353         | 0          | 1         | 1         |
| Ankrd16_j4  | 1.28519   | 1.37831         | 0          | 1         | 1         |
| Pter_j2     | 0.206064  | 0.194444        | -0.0837391 | 0.897494  | 0.967361  |
| Vim_j3      | 0.748251  | 0.852655        | 0.188439   | 0.644924  | 0.863026  |
| Vim         | 258.158   | 310.984         | 0.268584   | 0.0024252 | 0.0291436 |
| Vim_j7      | 0.202621  | 0 -1.79769e+308 |            | 0.0217142 | 0.149093  |
| Stam        | 7.93237   | 8.5389          | 0          | 1         | 1         |
| Mrc1        | 0.942551  | 1.89724         | 1.00926    | 6.65E-09  | 4.84E-07  |
| Cacnb2_j3   | 0.449068  | 0.405754        | -0.146328  | 0.66465   | 0.873063  |
| Arl5b       | 1.58995   | 1.24846         | 0          | 1         | 1         |
| Gm13368     | 1.39336   | 1.49719         | 0.10369    | 0.77721   | 0.924662  |
| Plxdc2      | 0.557146  | 0.619836        | 0.153833   | 0.476563  | 0.772209  |
| Mllt10_j5   | 0.864165  | 0.414464        | -1.06006   | 1.93E-05  | 0.0005401 |
| Commd3_j1   | 4.06871   | 4.54291         | 0.159047   | 0.61432   | 0.847685  |
| Commd3      | 36.6907   | 38.3726         | 0.0646606  | 0.546281  | 0.81297   |
| Bmi1        | 1.40889   | 1.3506          | 0          | 1         | 1         |
| Bmi1_j4     | 4.31308   | 4.22067         | 0          | 1         | 1         |
| BC061194_j3 | 0.124986  | 0.114305        | -0.128877  | 0.872538  | 1         |
| AK076779_j4 | 0.121028  | 0.0919386       | -0.396594  | 0.70409   | 1         |
| AK076779_j3 | 0.0595553 | 0 -1.79769e+308 |            | 0.0388812 | 1         |
| AK076779_j1 | 0.0945954 | 0.0747306       | -0.34007   | 0.783219  | 1         |
| AK076779_j2 | 0.123254  | 0 -1.79769e+308 |            | 0.0054429 | 1         |
| Msrp2       | 20.3442   | 19.1919         | -0.0841208 | 0.488057  | 0.778581  |
| Etl4_j1     | 0.904944  | 0.576323        | 0          | 1         | 1         |
| Etl4_j3     | 1.70881   | 0.896069        | 0          | 1         | 1         |
| Etl4_j6     | 3.51835   | 2.99773         | 0          | 1         | 1         |
| Etl4_j10    | 0.292373  | 0.145877        | 0          | 1         | 1         |
| Gm13375_j2  | 0.910117  | 0.758426        | 0          | 1         | 1         |
| Gm13375     | 4.20442   | 3.32542         | 0          | 1         | 1         |
| Thns1       | 1.35387   | 1.65018         | 0.28553    | 0.318796  | 0.66209   |
| Thns1       | 3.51004   | 4.06383         | 0.211352   | 0.141673  | 0.46823   |
| Thns1_j2    | 0.295818  | 0 -1.79769e+308 |            | 1.80E-07  | 9.02E-06  |
| Gpr158      | 11.3058   | 11.0391         | -0.0344327 | 0.714479  | 0.89656   |

|                  |           |                 |            |           |           |
|------------------|-----------|-----------------|------------|-----------|-----------|
| Apbb1ip          | 0.130947  | 0.106024        | -0.304596  | 0.704876  | 1         |
| Acbd5_j3         | 5.11211   | 4.01356         | 0          | 1         | 1         |
| Acbd5_j2         | 20.9354   | 17.9272         | 0          | 1         | 1         |
| Yme1l1_j4        | 0.600091  | 0.930107        | 0          | 1         | 1         |
| Psd4_j1          | 0.484317  | 0.306317        | -0.660926  | 0.0381046 | 0.216941  |
| Zmynd19          | 3.79025   | 4.1715          | 0          | 1         | 1         |
| Pnpla7_j2        | 0.419285  | 0.289978        | -0.531987  | 0.127249  | 0.444464  |
| Pnpla7_j5        | 0.418572  | 0.24567         | -0.768754  | 0.0836335 | 0.352592  |
| Nelf             | 0.558516  | 0.532848        | 0          | 1         | 1         |
| Nelf             | 0.743585  | 0.727223        | 0          | 1         | 1         |
| Nrarp            | 8.1301    | 6.86006         | -0.245052  | 0.0590471 | 0.28563   |
| Tprn             | 4.91205   | 4.92929         | 0.00505544 | 0.969673  | 0.99148   |
| Anapc2           | 9.32038   | 9.11778         | -0.0317051 | 0.713546  | 0.896209  |
| Man1b1           | 20.5848   | 21.4997         | 0.0627337  | 0.532245  | 0.804111  |
| Npdc1_j1         | 143.381   | 163.24          | 0.187141   | 0.029613  | 0.184175  |
| Fut7_j2          | 0.12197   | 0.0649845       | -0.908355  | 0.463998  | 1         |
| Fut7_j1          | 0.108098  | 0.142886        | 0.402521   | 0.645341  | 1         |
| Abca2            | 14.5352   | 3.08158         | -2.23781   | 0         | 0         |
| Abca2_j9         | 2.22852   | 0.0117179       | -7.57122   | 0.0001975 | 0.0037992 |
| Clic3_j1         | 0.450413  | 0.489325        | 0.119545   | 0.666221  | 0.873541  |
| Fbxw5_j1         | 0.449285  | 0 -1.79769e+308 |            | 7.84E-06  | 0.000251  |
| Edf1             | 2.10856   | 1.85479         | -0.185003  | 0.582171  | 0.832693  |
| Edf1_j1          | 1.20958   | 1.05022         | -0.20381   | 0.654903  | 0.868233  |
| Kcnt1_j3         | 3.60294   | 2.46368         | 0          | 1         | 1         |
| Kcnt1_j6         | 1.99327   | 1.42974         | 0          | 1         | 1         |
| Gpsm1_j1         | 0.177124  | 0.0977228       | 0          | 1         | 1         |
| Pmpca_j3         | 1.17179   | 1.16163         | 0          | 1         | 1         |
| Egfl7            | 3.88974   | 3.58685         | -0.116958  | 0.631583  | 0.85674   |
| Egfl7            | 16.6175   | 16.4967         | -0.0105282 | 0.937231  | 0.980745  |
| Fam69b           | 18.3887   | 16.0943         | -0.192266  | 0.122707  | 0.436069  |
| 5930434B04Rik    | 0.762483  | 0.626891        | 0          | 1         | 1         |
| Adamtsl2_j1      | 0.166833  | 0.0418861       | -1.99386   | 0.0509965 | 0.261718  |
| Adamtsl2_j5      | 0.143536  | 0.215613        | 0.58703    | 0.40171   | 0.724971  |
| BC094334         | 4.12157   | 4.08325         | -0.0134755 | 0.940232  | 0.981805  |
| Wdr5             | 7.11981   | 7.72144         | 0.11703    | 0.323501  | 0.666549  |
| BC050122_j2      | 0.133476  | 0.284981        | 1.09429    | 0.0189989 | 0.136135  |
| Rxra             | 3.39304   | 2.08281         | 0          | 1         | 1         |
| Rxra_j2          | 1.02646   | 0.158413        | 0          | 1         | 1         |
| Col5a1_j1        | 0.749131  | 0.798804        | 0          | 1         | 1         |
| F730016J06Rik_j5 | 0.109908  | 0.0245244       | -2.164     | 0.0194825 | 1         |
| Olfm1            | 103.371   | 95.8192         | 0          | 1         | 1         |
| Olfm1_j2         | 2.95922   | 3.73061         | 0          | 1         | 1         |
| XLOC_017966      | 0.282844  | 0.149236        | -0.922412  | 0.191044  | 0.533209  |
| Mrps2            | 9.36463   | 8.81519         | -0.0872306 | 0.455979  | 0.759645  |
| Gbgt1_j3         | 0.0493328 | 0.0256989       | -0.940841  | 0.610895  | 1         |
| Ralgds           | 3.46809   | 3.98951         | 0          | 1         | 1         |
| Ralgds           | 6.38417   | 6.89538         | 0          | 1         | 1         |



|             |           |           |            |           |           |
|-------------|-----------|-----------|------------|-----------|-----------|
| Tsc1        | 0.648658  | 0.367199  | 0          | 1         | 1         |
| Tsc1        | 0.116819  | 0.200602  | 0          | 1         | 1         |
| Ak8         | 0.330474  | 0.220369  | -0.584617  | 0.307889  | 0.652963  |
| Ttf1_j6     | 0.151102  | 0.104544  | -0.531416  | 0.38884   | 0.716173  |
| Ttf1_j8     | 1.0404    | 1.07422   | 0.0461445  | 0.878325  | 0.961084  |
| Setx        | 1.91796   | 1.56675   | -0.291798  | 0.0292023 | 0.182342  |
| Med27       | 10.3032   | 9.80504   | -0.0714955 | 0.606575  | 0.845067  |
| Med27_j3    | 11.5253   | 11.238    | -0.0364238 | 0.834621  | 0.946855  |
| Rapgef1_j1  | 0.675105  | 0.263493  | 0          | 1         | 1         |
| Rapgef1_j11 | 0.609191  | 0.600591  | 0          | 1         | 1         |
| Rapgef1_j12 | 1.436     | 1.9182    | 0          | 1         | 1         |
| Coq4        | 4.29739   | 4.65611   | 0.115664   | 0.428574  | 0.742435  |
| Slc27a4     | 39.8567   | 40.8361   | 0          | 1         | 1         |
| Urm1        | 11.8032   | 15.1272   | 0          | 1         | 1         |
| Odf2_j1     | 0.218251  | 0.172294  | -0.341119  | 0.551569  | 0.815852  |
| Odf2_j3     | 0.0477916 | 0.139085  | 1.54114    | 0.051384  | 1         |
| Odf2_j15    | 2.39333   | 2.47267   | 0.0470487  | 0.839265  | 0.948853  |
| Gle1        | 12.2289   | 12.0905   | -0.0164285 | 0.877423  | 0.96086   |
| Spna2       | 23.2087   | 7.99493   | 0          | 1         | 1         |
| Spna2_j5    | 22.8357   | 20.5016   | 0          | 1         | 1         |
| Tbc1d13     | 20.4742   | 19.5015   | -0.0702211 | 0.454486  | 0.758678  |
| Tbc1d13_j1  | 3.42472   | 3.51838   | 0.0389244  | 0.811419  | 0.938053  |
| Slc39a1-ps  | 2.87938   | 3.62334   | 0.33156    | 0.124546  | 0.439858  |
| Endog_j1    | 1.92936   | 1.93639   | 0          | 1         | 1         |
| Lrrc8a_j2   | 7.6723    | 5.09829   | 0          | 1         | 1         |
| Fam73b      | 14.1799   | 11.5002   | -0.30219   | 0.0089573 | 0.0788679 |
| Ppp2r4      | 1.01046   | 0.279463  | 0          | 1         | 1         |
| Ppp2r4_j4   | 0.642129  | 0.265678  | 0          | 1         | 1         |
| Cstad       | 0.287934  | 0.180242  | -0.675801  | 0.387526  | 0.715266  |
| Mettl11a_j1 | 2.46407   | 2.65022   | 0.105071   | 0.417839  | 0.734891  |
| Usp20_j1    | 11.4394   | 6.91921   | 0          | 1         | 1         |
| Gpr107      | 2.19514   | 2.07306   | -0.0825493 | 0.438296  | 0.748108  |
| Ncs1        | 5.51559   | 5.33539   | 0          | 1         | 1         |
| Ncs1_j1     | 9.3616    | 7.64557   | 0          | 1         | 1         |
| Ncs1_j2     | 15.4915   | 19.8799   | 0          | 1         | 1         |
| Ass1_j1     | 0.137115  | 0.0417691 | -1.71488   | 0.528337  | 0.801996  |
| Ass1_j2     | 0.624257  | 0.109084  | -2.51669   | 0.127666  | 0.445344  |
| Ass1_j6     | 2.09005   | 2.59694   | 0.313274   | 0.400252  | 0.723786  |
| Fubp3       | 4.33047   | 3.09969   | 0          | 1         | 1         |
| Fubp3_j3    | 0.882764  | 0.775195  | 0          | 1         | 1         |
| Fubp3       | 0.411153  | 1.13367   | 0          | 1         | 1         |
| Fubp3_j6    | 0.319544  | 0         | 0          | 1         | 1         |
| Prdm12_j1   | 7.18946   | 5.02025   | 0          | 1         | 1         |
| Prdm12_j5   | 21.5382   | 19.0452   | 0          | 1         | 1         |
| Exosc2      | 8.68795   | 9.90251   | 0.188779   | 0.166925  | 0.503257  |
| Abl1        | 1.11577   | 1.08487   | -0.0405137 | 0.812988  | 0.938881  |
| Abl1        | 0.0780445 | 0.0871    | 0.158376   | 0.775444  | 1         |

|               |           |           |               |           |           |
|---------------|-----------|-----------|---------------|-----------|-----------|
| Abl1_j2       | 0.0908564 | 0.0853353 | -0.0904446    | 0.901234  | 1         |
| Lamc3_j2      | 0.226363  | 0         | -1.79769e+308 | 7.22E-07  | 3.13E-05  |
| Lamc3_j3      | 0.236154  | 1.86E-05  | -13.6326      | 0.94689   | 0.984306  |
| Aif1l         | 5.93938   | 5.53262   | -0.10235      | 0.416526  | 0.733896  |
| Nup214_j2     | 2.44172   | 2.46119   | 0.0114534     | 0.934261  | 0.979958  |
| Ppapdc3       | 7.20811   | 7.24558   | 0.0074802     | 0.956893  | 0.987617  |
| Prrc2b        | 11.5717   | 10.3903   | -0.155363     | 0.0880313 | 0.363224  |
| Prrc2b_j1     | 2.97811   | 2.75568   | -0.111992     | 0.441747  | 0.750327  |
| Pomt1         | 1.95692   | 2.10738   | 0.106863      | 0.430714  | 0.743283  |
| Gm13611       | 43.3175   | 53.0272   | 0.291781      | 0.021404  | 0.147524  |
| Ciz1_j6       | 2.50026   | 2.38694   | 0             | 1         | 1         |
| Ptges2_j1     | 1.75205   | 1.51764   | -0.207217     | 0.445959  | 0.753304  |
| Ptges2_j3     | 0.341244  | 0.397313  | 0.219474      | 0.809808  | 0.937853  |
| Naif1         | 0.907739  | 0.831838  | -0.125975     | 0.597373  | 0.840279  |
| Naif1_j1      | 0.903432  | 1.12998   | 0.32281       | 0.239048  | 0.586151  |
| Fam102a_j1    | 0.128778  | 0         | -1.79769e+308 | 2.43E-06  | 1         |
| St6galnac4_j2 | 2.12453   | 3.44044   | 0.69545       | 1.99E-05  | 0.0005525 |
| St6galnac6    | 23.678    | 22.4454   | -0.0771288    | 0.432853  | 0.744519  |
| Ak1           | 9.02484   | 7.28393   | 0             | 1         | 1         |
| Ak1           | 13.0572   | 14.7334   | 0             | 1         | 1         |
| Eng           | 0.449703  | 0.436852  | -0.0418301    | 0.872571  | 0.959686  |
| XLOC_018024   | 0.24607   | 0.21364   | -0.203887     | 0.602266  | 0.842795  |
| Tor2a         | 2.81858   | 3.81294   | 0.435938      | 0.0065316 | 0.0624382 |
| XLOC_018026   | 0.297613  | 0.278697  | -0.0947419    | 0.846616  | 0.951509  |
| Angptl2       | 2.95554   | 4.18292   | 0             | 1         | 1         |
| Gm13530       | 0.351618  | 0.185063  | -0.925989     | 0.168329  | 0.504956  |
| Mapkap1_j1    | 1.87829   | 2.60876   | 0             | 1         | 1         |
| Mapkap1       | 5.33277   | 5.09809   | 0             | 1         | 1         |
| Mapkap1_j3    | 8.16176   | 7.29331   | 0             | 1         | 1         |
| Hspa5         | 4.07951   | 4.2087    | 0             | 1         | 1         |
| Gsn           | 11.7826   | 13.9309   | 0             | 1         | 1         |
| Gsn_j3        | 1.80217   | 2.44428   | 0             | 1         | 1         |
| Gsn           | 39.4666   | 53.8367   | 0             | 1         | 1         |
| Dab2ip        | 1.65482   | 0.821799  | 0             | 1         | 1         |
| Dab2ip_j5     | 4.60058   | 4.20762   | 0             | 1         | 1         |
| Dab2ip_j6     | 2.48733   | 2.27291   | 0             | 1         | 1         |
| Mrrf          | 1.82962   | 1.15261   | 0             | 1         | 1         |
| XLOC_018042   | 0.128061  | 0.0702878 | 0             | 1         | 1         |
| Rabgap1       | 8.08085   | 4.51487   | 0             | 1         | 1         |
| XLOC_018045   | 0.19714   | 0.0804861 | -1.29241      | 0.25873   | 0.60751   |
| Olfml2a       | 4.83266   | 4.89003   | 0.0170241     | 0.8641    | 0.95675   |
| Arcp5l        | 7.7686    | 7.50394   | -0.0500058    | 0.613284  | 0.84748   |
| Arhgap15_j4   | 5.1624    | 5.02643   | -0.038508     | 0.824771  | 0.943424  |
| Arhgap15_j5   | 0.778527  | 0         | -1.79769e+308 | 6.78E-08  | 3.87E-06  |
| Acvr2a        | 2.01588   | 1.93911   | 0             | 1         | 1         |
| Mbd5_j3       | 2.78361   | 2.38946   | 0             | 1         | 1         |
| Epc2_j1       | 2.36408   | 2.27057   | -0.058229     | 0.733322  | 0.905875  |

|             |           |             |                 |            |           |           |
|-------------|-----------|-------------|-----------------|------------|-----------|-----------|
| Epc2        | 0.112034  |             | 0 -1.79769e+308 | 0.0002428  |           | 1         |
| Kif5c_j1    | 18.8255   | 14.4343     |                 | 0          | 1         | 1         |
| Kif5c_j3    | 7.90166   | 11.1244     |                 | 0          | 1         | 1         |
| Kif5c_j8    | 13.123    | 5.57794     |                 | 0          | 1         | 1         |
| Lypd6b_j1   | 1.04365   | 1.40101     |                 | 0.42483    | 0.135725  | 0.458381  |
| Lypd6b_j8   | 0.135687  | 0.000203192 |                 | -9.38322   | 0.874185  | 1         |
| Lypd6b_j10  | 0.11466   |             | 0 -1.79769e+308 | 0.0098837  |           | 1         |
| Lypd6       | 0.51848   | 0.722029    |                 | 0          | 1         | 1         |
| Lypd6_j1    | 0.351668  | 0.291001    |                 | 0          | 1         | 1         |
| Lypd6_j3    | 0.647097  | 0.367204    |                 | 0          | 1         | 1         |
| AK045825_j1 | 0.392621  | 0.320249    |                 | -0.293945  | 0.603388  | 0.843376  |
| XLOC_018066 | 0.188216  | 0.2483      |                 | 0.399692   | 0.672297  | 0.876227  |
| XLOC_018066 | 0.196665  | 0.437973    |                 | 1.1551     | 0.13881   | 0.463325  |
| Tnfaip6     | 0.712235  | 0.757389    |                 | 0.0886828  | 0.756012  | 0.915846  |
| Rif1_j4     | 0.162599  | 0.0316155   |                 | -2.36261   | 0.0019872 | 0.0248414 |
| Gm13540     | 13.0326   | 15.7844     |                 | 0          | 1         | 1         |
| XLOC_018073 | 0.129126  | 0.0527406   |                 | -1.2918    | 0.327184  | 1         |
| Fmnl2_j2    | 3.34776   | 3.82675     |                 | 0.192922   | 0.197774  | 0.540712  |
| Fmnl2_j7    | 1.54878   | 1.67182     |                 | 0.110283   | 0.720174  | 0.899588  |
| Arl6ip6     | 0.174113  | 0.132566    |                 | -0.393306  | 0.567028  | 0.82484   |
| Arl6ip6     | 0.367484  | 0.699251    |                 | 0.928127   | 0.0049004 | 0.0499353 |
| Gm13503     | 3.45969   | 3.28823     |                 | -0.0733336 | 0.78862   | 0.929506  |
| XLOC_018077 | 0.393231  | 0.17594     |                 | 0          | 1         | 1         |
| Galnt13     | 0.203078  | 0.212912    |                 | 0.0682242  | 0.85088   | 0.952632  |
| Galnt13_j4  | 5.97565   | 4.45853     |                 | -0.422529  | 0.0001142 | 0.0024074 |
| AK036371_j2 | 0.0798715 | 0.0639176   |                 | -0.321467  | 0.671838  | 1         |
| XLOC_018081 | 0.174038  | 0.0892096   |                 | 0          | 1         | 1         |
| Kcnj3_j7    | 0.358745  | 0.000108306 |                 | 0          | 1         | 1         |
| Kcnj3_j6    | 1.21164   | 1.01118     |                 | 0          | 1         | 1         |
| Kcnj3_j8    | 0.588318  | 0           |                 | 0          | 1         | 1         |
| Gpd2        | 5.55533   | 4.63453     |                 | 0          | 1         | 1         |
| Gpd2_j1     | 0.2607    | 0.289888    |                 | 0          | 1         | 1         |
| Galnt5      | 3.55171   | 3.17027     |                 | -0.163907  | 0.135855  | 0.458613  |
| Galnt5_j2   | 2.06542   | 1.47616     |                 | -0.484584  | 0.0159935 | 0.120344  |
| Upp2_j10    | 0.32929   | 0.204928    |                 | -0.684238  | 0.110548  | 0.413801  |
| Upp2_j14    | 1.13159   | 0.649391    |                 | -0.801197  | 0.0230707 | 0.155463  |
| Pkp4        | 6.37524   | 6.69771     |                 | 0.0711879  | 0.529857  | 0.802757  |
| Dapl1       | 0.30092   | 0.198703    |                 | -0.598769  | 0.429141  | 0.742566  |
| Tanc1_j1    | 2.05646   | 1.42758     |                 | 0          | 1         | 1         |
| Tanc1_j6    | 0.282347  | 0.825795    |                 | 0          | 1         | 1         |
| Tanc1_j9    | 1.24007   | 1.13504     |                 | 0          | 1         | 1         |
| March7_j1   | 2.48954   | 3.19793     |                 | 0          | 1         | 1         |
| March7      | 9.46016   | 7.37512     |                 | 0          | 1         | 1         |
| Tank_j5     | 0.368606  | 0.664722    |                 | 0.850669   | 0.175856  | 0.514347  |
| Tank_j4     | 0.0835728 |             | 0 -1.79769e+308 | 0.0468529  |           | 1         |
| Tank_j3     | 0.275609  | 0.0961271   |                 | -1.51961   | 0.23532   | 0.58252   |
| Psm14       | 50.7561   | 47.2292     |                 | 0          | 1         | 1         |

|               |           |                 |            |           |           |
|---------------|-----------|-----------------|------------|-----------|-----------|
| Slc4a10_j2    | 0.109452  | 0.015064        | -2.86112   | 0.0326081 | 1         |
| Slc4a10_j1    | 0.236542  | 0.156912        | -0.592145  | 0.19742   | 0.540321  |
| Slc4a10_j5    | 0.0654361 | 0.164306        | 1.32822    | 0.0465317 | 0.247371  |
| Gca_j2        | 0.262609  | 0.279345        | 0          | 1         | 1         |
| XLOC_018100   | 0.102248  | 0.0522848       | -0.967606  | 0.454515  | 1         |
| AK007819      | 0.196006  | 0.0541387       | -1.85616   | 0.112461  | 0.41729   |
| Scn2a1_j9     | 0.0804503 | 0 -1.79769e+308 |            | 0.0001773 | 1         |
| Scn2a1_j12    | 0.719381  | 0.586489        | -0.29465   | 0.338321  | 0.678723  |
| Csrnp3        | 0.635192  | 0.407526        | 0          | 1         | 1         |
| Csrnp3_j2     | 0.622802  | 0.348467        | 0          | 1         | 1         |
| Csrnp3        | 0.704594  | 0               | 0          | 1         | 1         |
| Csrnp3_j4     | 0.190241  | 0.0663674       | 0          | 1         | 1         |
| Gm13630_j4    | 0.114958  | 0.140759        | 0          | 1         | 1         |
| Gm13602       | 2.34103   | 3.05363         | 0.383382   | 0.226462  | 0.573564  |
| Gm13597       | 19.2128   | 24.0647         | 0.324856   | 0.0041756 | 0.0442527 |
| Lass6_j2      | 3.45898   | 4.18719         | 0.275635   | 0.0151981 | 0.116007  |
| Nostrin       | 0.597     | 0.624212        | 0.0643046  | 0.835204  | 0.946964  |
| Bbs5          | 5.50035   | 5.03261         | -0.128217  | 0.426654  | 0.741282  |
| Ppig_j2       | 0.0662448 | 0               | 0          | 1         | 1         |
| Ppig          | 1.3104    | 1.06045         | 0          | 1         | 1         |
| Klhl23_j2     | 0.354989  | 0.455228        | 0.358814   | 0.348085  | 0.686627  |
| Klhl23        | 0.183638  | 0.0217468       | -3.07799   | 0.0093264 | 0.0814163 |
| Ssb           | 26.7484   | 29.2493         | 0          | 1         | 1         |
| Ssb           | 4.06722   | 1.46536         | 0          | 1         | 1         |
| Ubr3          | 14.0108   | 12.6046         | -0.15259   | 0.116383  | 0.424447  |
| Ubr3_j5       | 12.5066   | 11.7327         | -0.0921647 | 0.469694  | 0.76771   |
| Rpl9-ps7      | 89.0145   | 101.056         | 0.18304    | 0.0525647 | 0.266344  |
| Gorasp2       | 17.6483   | 16.0908         | 0          | 1         | 1         |
| Dcaf17        | 0.699154  | 0.75406         | 0.109069   | 0.54532   | 0.81223   |
| Cybrd1        | 2.0418    | 1.78056         | -0.197511  | 0.223487  | 0.570621  |
| Dync1i2       | 74.0132   | 80.109          | 0          | 1         | 1         |
| Dync1i2_j7    | 1.37281   | 4.37348         | 0          | 1         | 1         |
| Hat1          | 6.87691   | 5.88345         | -0.225098  | 0.152698  | 0.484619  |
| Hat1_j1       | 2.90574   | 2.59037         | -0.165748  | 0.560438  | 0.821119  |
| Metap1d       | 1.94923   | 0.801525        | -1.28209   | 0.0080026 | 0.0725503 |
| Metap1d_j6    | 5.07536   | 5.15862         | 0.0234758  | 0.889567  | 0.964965  |
| AK144798_j1   | 0.187261  | 0.0840897       | -1.15505   | 0.0742201 | 0.328448  |
| Pdk1_j2       | 0.0683139 | 0               | 0          | 1         | 1         |
| Pdk1          | 3.47649   | 3.27466         | 0          | 1         | 1         |
| Rapgef4       | 3.76819   | 3.78405         | 0          | 1         | 1         |
| Rapgef4_j2    | 21.6004   | 20.9401         | 0          | 1         | 1         |
| Rapgef4_j4    | 15.3612   | 12.8543         | 0          | 1         | 1         |
| B230120H23Rik | 1.68209   | 2.08552         | 0.310146   | 0.0503576 | 0.259477  |
| Cdca7_j1      | 0.30517   | 0.0383112       | -2.99377   | 0.224233  | 0.571444  |
| Cdca7_j3      | 0.104947  | 0.0884423       | -0.246858  | 0.827405  | 1         |
| Scrn3         | 5.79658   | 4.01929         | 0          | 1         | 1         |
| AK029663      | 0.104001  | 0.149049        | 0.519188   | 0.477105  | 1         |

|             |           |                 |            |           |           |
|-------------|-----------|-----------------|------------|-----------|-----------|
| Gm13705     | 1.18227   | 0.720822        | -0.713846  | 0.157894  | 0.492102  |
| XLOC_018147 | 0.27454   | 0.257169        | -0.094302  | 0.821287  | 0.942238  |
| Mtx2        | 11.3852   | 9.8766          | -0.205076  | 0.196983  | 0.539845  |
| XLOC_018152 | 0.177251  | 0.0165394       | -3.42182   | 0.262267  | 0.611336  |
| XLOC_018152 | 0.133622  | 0.105504        | -0.340859  | 0.580591  | 1         |
| XLOC_018152 | 0.143666  | 0.00834433      | -4.10578   | 0.334122  | 0.674914  |
| XLOC_018152 | 0.279023  | 0.185349        | -0.590142  | 0.0518151 | 0.263999  |
| Hrnnpa3_j1  | 17.0371   | 18.7016         | 0          | 1         | 1         |
| Agps        | 3.73889   | 2.31245         | 0          | 1         | 1         |
| Rbm45       | 8.0762    | 9.24714         | 0.195331   | 0.105209  | 0.402703  |
| Osbpl6      | 0.744546  | 0.287617        | 0          | 1         | 1         |
| Osbpl6_j1   | 0         | 0.334082        | 0          | 1         | 1         |
| Plekha3     | 1.21087   | 0.860667        | -0.492519  | 0.163049  | 0.498226  |
| Ube2e3      | 14.7097   | 14.7332         | 0          | 1         | 1         |
| Ube2e3_j3   | 0.133922  | 0               | 0          | 1         | 1         |
| Ube2e3_j5   | 1.01481   | 0.70279         | 0          | 1         | 1         |
| Itga4_j1    | 0.120287  | 0 -1.79769e+308 |            | 0.0138558 | 1         |
| Itga4_j4    | 0.115621  | 0 -1.79769e+308 |            | 1.56E-06  | 1         |
| XLOC_018167 | 0.124587  | 0.0320861       | 0          | 1         | 1         |
| Ssfa2       | 1.16582   | 0.908889        | 0          | 1         | 1         |
| Ppp1r1c     | 31.6518   | 25.4829         | -0.312757  | 0.0037955 | 0.0413312 |
| Ppp1r1c_j2  | 0.361527  | 0.0789368       | -2.19533   | 0.0108123 | 0.0906686 |
| Dnajc10     | 24.7008   | 23.7225         | -0.0583018 | 0.518035  | 0.796161  |
| Nup35_j3    | 0.132212  | 0.066987        | -0.980899  | 0.354706  | 1         |
| Nup35_j5    | 0.118711  | 0.0715887       | -0.729646  | 0.441595  | 1         |
| Zfp804a_j1  | 0.117084  | 0               | 0          | 1         | 1         |
| Zfp804a     | 1.01464   | 0.475742        | 0          | 1         | 1         |
| Gm13675     | 4.51264   | 4.26091         | -0.082811  | 0.744433  | 0.910803  |
| Zc3h15      | 19.1195   | 19.6656         | 0.0406293  | 0.70634   | 0.8928    |
| Itgav_j1    | 0.321388  | 0.22456         | 0          | 1         | 1         |
| Fam171b     | 10.5699   | 8.17634         | 0          | 1         | 1         |
| Med19_j1    | 5.60817   | 6.30061         | 0          | 1         | 1         |
| Ypel4_j1    | 4.91516   | 6.21489         | 0.338492   | 0.0334639 | 0.199836  |
| Ypel4       | 13.4732   | 12.3172         | -0.129412  | 0.288295  | 0.636107  |
| Ube2l6      | 10.981    | 11.1743         | 0.0251777  | 0.830851  | 0.945436  |
| Timm10      | 20.5698   | 21.6341         | 0.0727775  | 0.567465  | 0.824883  |
| Slc43a3_j3  | 0.730318  | 0.890568        | 0.2862     | 0.463845  | 0.764328  |
| Slc43a3     | 16.1432   | 14.7975         | -0.125572  | 0.256618  | 0.605481  |
| Tnks1bp1_j1 | 3.32778   | 2.99692         | -0.151077  | 0.298644  | 0.645349  |
| Tnks1bp1    | 4.44016   | 3.92487         | -0.177967  | 0.176474  | 0.515213  |
| Tnks1bp1_j6 | 11.0109   | 13.5997         | 0.304645   | 0.0040913 | 0.0436312 |
| Aplnr       | 1.05175   | 1.07341         | 0.0294087  | 0.883111  | 0.962848  |
| Gm1826      | 2.12053   | 2.51162         | 0.244194   | 0.263281  | 0.612179  |
| Fnbp4       | 1.10724   | 0.247475        | 0          | 1         | 1         |
| Fnbp4_j6    | 1.18869   | 1.12737         | 0          | 1         | 1         |
| Agbl2_j2    | 0.0730496 | 0.0535915       | -0.44687   | 0.792053  | 1         |
| Mtch2       | 9.02497   | 6.91755         | 0          | 1         | 1         |

|             |           |            |               |           |           |
|-------------|-----------|------------|---------------|-----------|-----------|
| Kbtbd4_j2   | 0.811027  | 0.681176   | -0.251722     | 0.20172   | 0.545317  |
| Kbtbd4_j1   | 0.0222813 | 0.0645292  | 1.53412       | 0.0632166 | 1         |
| Celf1       | 9.37887   | 9.69477    | 0.0477928     | 0.656278  | 0.86886   |
| Psmc3_j2    | 2.089     | 2.24555    | 0             | 1         | 1         |
| Psmc3_j3    | 10.3558   | 8.41997    | 0             | 1         | 1         |
| Sfpi1_j2    | 0.401199  | 0.828506   | 1.0462        | 0.0378021 | 0.2158    |
| Sfpi1       | 0.641643  | 1.34394    | 1.06663       | 0.0014898 | 0.0196365 |
| Acp2        | 6.02261   | 5.73785    | 0             | 1         | 1         |
| Pacsin3     | 0.993743  | 1.16565    | 0             | 1         | 1         |
| Pacsin3     | 0.377551  | 0.416846   | 0             | 1         | 1         |
| Pacsin3     | 0.387266  | 0.355072   | 0             | 1         | 1         |
| Pacsin3_j4  | 0.633521  | 0.726997   | 0             | 1         | 1         |
| Pacsin3_j5  | 2.40179   | 2.21022    | 0             | 1         | 1         |
| Lrp4_j5     | 0.183873  | 0.0983361  | -0.902912     | 0.0905874 | 0.36964   |
| Ckap5_j1    | 4.57004   | 3.30639    | -0.466951     | 0.0006955 | 0.0106669 |
| Ckap5_j3    | 30.5574   | 27.0562    | -0.175565     | 0.0434108 | 0.236471  |
| Ckap5_j4    | 1.52906   | 1.57497    | 0.0426838     | 0.822423  | 0.942695  |
| Arhgap1     | 0.235709  | 0.196755   | 0             | 1         | 1         |
| Harbi1_j1   | 0.0758806 | 0.0617612  | -0.297029     | 0.719309  | 1         |
| Harbi1      | 0.347687  | 0.425801   | 0.29239       | 0.339686  | 0.679917  |
| Ambra1_j2   | 2.98722   | 2.25774    | 0             | 1         | 1         |
| Ambra1      | 4.33885   | 3.9461     | 0             | 1         | 1         |
| Ambra1      | 1.6188    | 2.19322    | 0             | 1         | 1         |
| Ambra1_j4   | 5.2114    | 6.66161    | 0             | 1         | 1         |
| Ambra1_j6   | 3.86524   | 3.87484    | 0             | 1         | 1         |
| AK039132    | 2.82753   | 1.7463     | -0.695241     | 0.0001026 | 0.0022056 |
| Phf21a_j1   | 0.719443  | 0.00033693 | 0             | 1         | 1         |
| Phf21a_j14  | 0.884832  | 0          | 0             | 1         | 1         |
| Pex16_j2    | 1.32882   | 1.32505    | 0             | 1         | 1         |
| Chst1       | 1.7696    | 2.77193    | 0             | 1         | 1         |
| Syt13       | 0.550109  | 0.41219    | -0.416406     | 0.101998  | 0.39572   |
| Trp53i11    | 0.273548  | 0.300701   | 0             | 1         | 1         |
| XLOC_018225 | 0.234381  | 0.0436632  | -2.42436      | 0.313014  | 0.657381  |
| Lrrc4c      | 3.97619   | 2.91925    | -0.44579      | 0.0018201 | 0.0232121 |
| XLOC_018226 | 0.132772  | 0          | -1.79769e+308 | 0.0024916 | 1         |
| Traf6       | 1.19698   | 1.0214     | 0             | 1         | 1         |
| Traf6       | 1.22083   | 1.29707    | 0             | 1         | 1         |
| Commd9      | 25.8877   | 26.372     | 0.0267411     | 0.805802  | 0.935848  |
| Apip_j1     | 4.24953   | 4.72159    | 0.15197       | 0.527148  | 0.801435  |
| Apip        | 7.22523   | 7.57892    | 0.0689485     | 0.711832  | 0.895422  |
| Apip_j2     | 1.06591   | 1.40879    | 0.402375      | 0.450029  | 0.755874  |
| Abtb2       | 4.9169    | 3.88582    | 0             | 1         | 1         |
| Lmo2        | 1.93689   | 2.02583    | 0             | 1         | 1         |
| Lmo2        | 1.56536   | 1.16746    | 0             | 1         | 1         |
| Fbxo3_j1    | 8.44182   | 7.24562    | -0.220446     | 0.207014  | 0.551484  |
| Fbxo3       | 22.5629   | 18.9928    | -0.248496     | 0.012676  | 0.102195  |
| Cd59a       | 21.0958   | 25.7094    | 0             | 1         | 1         |

|                  |           |                 |            |           |           |
|------------------|-----------|-----------------|------------|-----------|-----------|
| AK015665_j1      | 0.31618   | 0.42161         | 0.415162   | 0.39529   | 0.720455  |
| AK015665_j7      | 0.0858608 | 0.021731        | -1.98224   | 0.266055  | 1         |
| AK015665_j6      | 0.232487  | 0.343732        | 0.564136   | 0.326123  | 0.669404  |
| AK015665_j11     | 0.158841  | 0.249781        | 0.653076   | 0.200282  | 0.543585  |
| Cstf3            | 1.98993   | 1.36948         | 0          | 1         | 1         |
| XLOC_018242      | 0.348286  | 0.376973        | 0.11419    | 1         | 1         |
| O610012H03Rik    | 0.356712  | 0.167647        | -1.08933   | 0.120098  | 0.431454  |
| XLOC_018249      | 0.193407  | 0.0482204       | -2.00392   | 0.126144  | 0.442326  |
| Gm14013          | 10.4639   | 11.545          | 0.141845   | 0.573761  | 0.827772  |
| Dcdc5_j1         | 0.147743  | 0.0467329       | -1.66058   | 0.173966  | 0.512046  |
| Mpped2           | 0.700656  | 0.498715        | 0          | 1         | 1         |
| Mpped2_j1        | 5.92799   | 3.75104         | 0          | 1         | 1         |
| Mpped2_j4        | 1.15082   | 0.542369        | 0          | 1         | 1         |
| Kcna4_j2         | 0.959402  | 1.15487         | 0          | 1         | 1         |
| Kcna4            | 3.02315   | 2.31522         | 0          | 1         | 1         |
| Kif18a_j1        | 0.0756192 | 0.0905247       | 0.259559   | 0.756248  | 1         |
| Kif18a           | 0.312153  | 0.19118         | -0.707319  | 0.121053  | 0.433162  |
| Bdnf             | 3.43      | 3.8725          | 0          | 1         | 1         |
| Bdnf             | 5.78445   | 6.20921         | 0          | 1         | 1         |
| Lin7c            | 10.2934   | 10.0887         | -0.0289833 | 0.78459   | 0.92757   |
| Lgr4             | 7.43079   | 5.536           | 0          | 1         | 1         |
| Ccdc34           | 0.858605  | 0.648687        | -0.404472  | 0.204961  | 0.549271  |
| Lpcat4           | 38.4566   | 30.443          | -0.337119  | 0.0004333 | 0.007219  |
| Nop10            | 40.522    | 42.6977         | 0.0754515  | 0.447849  | 0.754581  |
| Slc12a6_j3       | 8.51711   | 8.14861         | 0          | 1         | 1         |
| Slc12a6_j4       | 0.264624  | 0 -1.79769e+308 |            | 0.015485  | 0.117492  |
| Slc12a6_j5       | 0.0992231 | 0.0480863       | -1.04505   | 0.368703  | 1         |
| 2900064A13Rik    | 13.0607   | 12.7093         | -0.0393437 | 0.671367  | 0.875764  |
| Aven             | 7.36286   | 7.50851         | 0.028261   | 0.817956  | 0.940936  |
| Fmn1             | 0.263015  | 0.113845        | 0          | 1         | 1         |
| Fmn1_j1          | 1.20043   | 1.22413         | 0          | 1         | 1         |
| A530058N18Rik    | 0.407635  | 0.135708        | -1.58678   | 0.0393707 | 0.221682  |
| A530058N18Rik    | 0.161865  | 3.14E-05        | -12.3302   | 0.984712  | 0.995478  |
| C130080G10Rik_j1 | 0.0985225 | 0.0883413       | -0.157366  | 0.905476  | 1         |
| BC052040_j1      | 0.40601   | 0.513772        | 0.339614   | 0.410753  | 0.730416  |
| BC052040         | 1.44021   | 1.04782         | -0.458887  | 0.053586  | 0.269557  |
| AK083230_j5      | 0.195451  | 0.155305        | -0.331699  | 0.614062  | 0.847685  |
| AK083230_j4      | 0.078501  | 0.114766        | 0.547911   | 0.544676  | 1         |
| Spred1           | 12.9745   | 10.9431         | -0.24566   | 0.0087674 | 0.0776917 |
| Fam98b           | 11.8376   | 11.2324         | -0.075704  | 0.575183  | 0.828142  |
| Thbs1_j4         | 0.0468493 | 0.00758459      | -2.62689   | 0.164505  | 1         |
| Eif2ak4          | 1.32283   | 1.22659         | 0          | 1         | 1         |
| Bub1b_j1         | 1.10368   | 0.708135        | -0.640227  | 0.0021538 | 0.0264365 |
| Bub1b            | 0.0557163 | 0.180524        | 1.69602    | 0.0241985 | 0.160606  |
| 5430417L22Rik    | 2.85181   | 2.59069         | -0.138539  | 0.372127  | 0.705073  |
| Disp2            | 17.1098   | 12.435          | 0          | 1         | 1         |
| Disp2_j3         | 15.1906   | 15.5661         | 0          | 1         | 1         |

|                  |           |                 |            |           |           |
|------------------|-----------|-----------------|------------|-----------|-----------|
| Disp2_j5         | 24.3962   | 30.1373         | 0          | 1         | 1         |
| D2Ert750e        | 0.23694   | 0.260006        | 0.134023   | 0.718407  | 0.898627  |
| D2Ert750e_j2     | 0.0587454 | 0.0317285       | -0.888697  | 0.478246  | 1         |
| Ivd              | 7.97397   | 7.01884         | -0.184065  | 0.104196  | 0.400425  |
| Bahd1            | 9.44673   | 9.53408         | 0.0132791  | 0.900719  | 0.968396  |
| Rpsd2            | 1.10589   | 1.11166         | 0.00749912 | 0.963745  | 0.989792  |
| Rad51            | 0.465423  | 0.209018        | -1.15492   | 0.021712  | 0.149093  |
| Gchfr            | 0.444018  | 0.521761        | 0.23277    | 0.649954  | 0.865569  |
| Zfyve19          | 3.3641    | 4.09027         | 0          | 1         | 1         |
| Zfyve19_j4       | 0.123787  | 0.343571        | 0          | 1         | 1         |
| Vps18            | 12.9206   | 12.242          | -0.0778264 | 0.442174  | 0.750452  |
| Dll4             | 0.579202  | 0.486337        | -0.252111  | 0.381645  | 0.71199   |
| Chac1            | 4.26587   | 6.85771         | 0.684888   | 2.19E-05  | 0.0005956 |
| Chac1_j2         | 3.13016   | 5.78651         | 0.886455   | 8.03E-05  | 0.0017797 |
| 1500003O03Rik    | 12.0874   | 9.8309          | 0          | 1         | 1         |
| 1500003O03Rik_j1 | 13.245    | 11.1457         | 0          | 1         | 1         |
| Nusap1           | 0.161618  | 0.154479        | -0.0651755 | 0.864111  | 0.95675   |
| Rtf1             | 8.11596   | 8.24251         | 0.0223218  | 0.829977  | 0.945085  |
| Tyro3            | 12.392    | 12.1694         | -0.0261469 | 0.797047  | 0.932581  |
| Mapkbp1_j4       | 0.447064  | 0.447577        | 0.001654   | 0.995396  | 0.998726  |
| Mapkbp1_j5       | 0.0860435 | 0.0370689       | -1.21486   | 0.209073  | 1         |
| Pla2g4b_j2       | 0.152889  | 0.0453937       | -1.75192   | 0.110869  | 0.414403  |
| Pla2g4b_j3       | 0.61747   | 0.414501        | -0.574996  | 0.187246  | 0.528218  |
| Pla2g4b_j5       | 0.186432  | 0.0504357       | -1.88613   | 0.156392  | 0.4898    |
| Capn3_j1         | 1.00892   | 0.844464        | 0          | 1         | 1         |
| Capn3_j7         | 0.0618843 | 0 -1.79769e+308 | 0.0454695  | 0.0454695 | 1         |
| Snap23_j1        | 0.563157  | 0.627619        | 0          | 1         | 1         |
| Snap23           | 0.751917  | 0.932604        | 0          | 1         | 1         |
| Snap23_j3        | 0.394215  | 0.308445        | 0          | 1         | 1         |
| Haus2            | 0.918395  | 0.859096        | 0          | 1         | 1         |
| Stard9_j1        | 0.192986  | 0.06953         | 0          | 1         | 1         |
| mKIAA1300_j1     | 0.241972  | 0.269797        | 0          | 1         | 1         |
| XLOC_018324      | 0.223191  | 0.189935        | 0          | 1         | 1         |
| mKIAA1300_j5     | 0.598854  | 0.571738        | 0          | 1         | 1         |
| Tmem62           | 0.643856  | 0.206435        | -1.64105   | 0.0058139 | 0.057084  |
| Ccndbp1          | 43.8073   | 43.4656         | -0.0112986 | 0.904135  | 0.9694    |
| Ckmt1            | 79.5537   | 58.0821         | 0          | 1         | 1         |
| Ckmt1            | 57.153    | 40.2934         | 0          | 1         | 1         |
| Pdia3            | 75.7169   | 77.2219         | 0.0283951  | 0.740081  | 0.908917  |
| Wdr76_j3         | 0.0904697 | 0 -1.79769e+308 | 0.0633906  | 0.0633906 | 1         |
| Casc4_j1         | 0.208083  | 0.153909        | 0          | 1         | 1         |
| Casc4            | 6.54878   | 5.01026         | 0          | 1         | 1         |
| Ctdspl2          | 0.262893  | 0.15685         | -0.745089  | 0.108374  | 0.409368  |
| Ctdspl2_j2       | 0.05679   | 0 -1.79769e+308 | 0.0022269  | 0.0022269 | 1         |
| Eif3j_j1         | 0.358266  | 0.331306        | -0.112868  | 0.886934  | 0.964085  |
| Eif3j_j2         | 0.179316  | 0.10909         | -0.716982  | 0.477196  | 0.772633  |
| B2m              | 34.954    | 34.6298         | -0.0134445 | 0.879635  | 0.961523  |



|             |            |                 |            |           |          |
|-------------|------------|-----------------|------------|-----------|----------|
| Sord_j1     | 0.21005    | 0.162204        | -0.372925  | 0.394989  | 0.720135 |
| Spata5l1    | 0.787191   | 0.948475        | 0.268897   | 0.247301  | 0.594858 |
| AA467197    | 0.148158   | 0.184861        | 0.319298   | 0.784199  | 0.927408 |
| Pldn        | 3.40287    | 2.93539         | -0.2132    | 0.206378  | 0.550869 |
| pa          | 0.138265   | 0.174559        | 0.336282   | 0.604586  | 0.843983 |
| Sqrdl       | 2.89378    | 3.42973         | 0.24514    | 0.183541  | 0.524115 |
| Ctxn2_j2    | 0.322272   | 0.22371         | -0.52665   | 0.650716  | 0.865956 |
| Ctxn2_j4    | 0.431131   | 0.313041        | -0.461778  | 0.444418  | 0.752113 |
| Dut         | 0.774244   | 0.651919        | -0.248096  | 0.496157  | 0.783139 |
| Dut         | 4.9302     | 3.78541         | -0.381195  | 0.0142927 | 0.111133 |
| Fgf7        | 0.317258   | 0.0945591       | -1.74637   | 0.0856723 | 0.357343 |
| Dtwd1       | 1.35235    | 1.35972         | 0.00784081 | 0.979282  | 0.993977 |
| Dtwd1_j1    | 0.00480804 | 0.534744        | 6.79725    | 0.19321   | 0.535528 |
| Usp8        | 14.8227    | 11.5937         | 0          | 1         | 1        |
| Usp8_j2     | 0.102765   | 0.0245213       | 0          | 1         | 1        |
| Ap4e1       | 2.10715    | 1.77771         | 0          | 1         | 1        |
| Blvra_j3    | 0.710745   | 0.863082        | 0          | 1         | 1        |
| Snrnp200_j2 | 5.42544    | 4.22938         | 0          | 1         | 1        |
| Tmem127     | 3.53913    | 3.15323         | 0          | 1         | 1        |
| Stard7      | 6.44818    | 5.96484         | -0.112409  | 0.377618  | 0.709363 |
| Mrps5_j1    | 4.49593    | 4.24014         | -0.0845061 | 0.531964  | 0.803902 |
| Bcl2l11     | 0.154204   | 0.102197        | -0.593488  | 0.342284  | 0.68209  |
| Bcl2l11     | 0.0992594  | 0.130963        | 0.399877   | 0.517861  | 1        |
| Mertk_j1    | 1.27215    | 1.04951         | -0.277551  | 0.194403  | 0.536757 |
| Mertk_j4    | 0.551314   | 0.51222         | -0.106112  | 0.794422  | 0.931431 |
| Tmem87b_j1  | 1.82812    | 1.59977         | -0.192496  | 0.269643  | 0.618744 |
| Tmem87b_j3  | 4.49614    | 3.85288         | -0.222751  | 0.248098  | 0.595431 |
| Fbln7_j5    | 0.0489274  | 0 -1.79769e+308 |            | 0.0477662 | 1        |
| Fbln7_j6    | 0.224109   | 0.156957        | -0.513829  | 0.465217  | 0.765114 |
| Fbln7_j8    | 0.103697   | 0 -1.79769e+308 |            | 0.008261  | 1        |
| Zc3h6       | 0.739943   | 0.262622        | -1.49442   | 2.55E-06  | 9.42E-05 |
| Ttl         | 77.7225    | 75.288          | -0.045913  | 0.595062  | 0.838618 |
| Polr1b      | 1.32567    | 1.54491         | 0.220795   | 0.264932  | 0.613821 |
| Polr1b_j1   | 0.323295   | 0.446839        | 0.466902   | 0.222334  | 0.569453 |
| Chchd5      | 5.19887    | 5.30543         | 0.0292726  | 0.855097  | 0.954157 |
| Slc20a1     | 9.1232     | 8.73663         | -0.0624634 | 0.539502  | 0.808383 |
| Slc20a1_j3  | 0.0495916  | 0 -1.79769e+308 |            | 0.102669  | 1        |
| Sirpa       | 6.6896     | 6.48588         | -0.0446181 | 0.77007   | 0.92169  |
| Stk35_j1    | 0.811854   | 0.711466        | -0.190426  | 0.352386  | 0.689283 |
| Stk35       | 0.724878   | 0.676922        | -0.0987486 | 0.649177  | 0.865184 |
| Stk35_j3    | 3.82415    | 4.22458         | 0.143668   | 0.284206  | 0.632886 |
| Nop56_j1    | 0.107212   | 0.0568561       | -0.915073  | 0.12371   | 1        |
| Ebf3_j1     | 0.583928   | 0.677508        | 0          | 1         | 1        |
| Ebf3_j7     | 1.75738    | 1.97733         | 0          | 1         | 1        |
| Vps16_j1    | 0.0681857  | 0.0281452       | 0          | 1         | 1        |
| Vps16_j4    | 1.67756    | 1.96174         | 0          | 1         | 1        |
| Ptpra_j1    | 0.509412   | 0.450142        | 0          | 1         | 1        |

|                  |           |            |               |           |           |
|------------------|-----------|------------|---------------|-----------|-----------|
| Ptpa_j3          | 23.3302   | 23.255     | 0             | 1         | 1         |
| Mrps26           | 1.12295   | 1.33168    | 0.245959      | 0.156522  | 0.490077  |
| ltpa_j2          | 0.148944  | 0.0842918  | -0.821301     | 0.594077  | 0.838368  |
| ltpa_j1          | 0.141421  | 0.0551612  | -1.35827      | 0.527523  | 0.801698  |
| ltpa_j6          | 0.36398   | 0.234609   | 0             | 1         | 1         |
| XLOC_018393      | 0.208187  | 0.134678   | -0.628365     | 0.449564  | 0.755642  |
| Atrn_j1          | 0.0667264 | 0.0138575  | -2.26759      | 0.177927  | 1         |
| Cdc25b           | 1.3223    | 1.23219    | -0.101828     | 0.670687  | 0.87546   |
| Cdc25b           | 0.278594  | 0.11855    | -1.23268      | 0.0786802 | 0.340223  |
| 2310035K24Rik    | 3.60673   | 3.60489    | -0.000738773  | 0.997144  | 0.999174  |
| 2310035K24Rik    | 3.63197   | 3.88979    | 0.0989365     | 0.650404  | 0.86582   |
| Mavs_j3          | 0.311139  | 0.185836   | -0.743532     | 0.169366  | 0.506291  |
| Mavs_j4          | 0.075879  | 0.00356366 | -4.41227      | 0.193514  | 1         |
| Mavs             | 0         | 0.215127   | 1.79769e+308  | 0.0005234 | 0.0084618 |
| XLOC_018399      | 0.14718   | 0.163888   | 0.155134      | 0.8082    | 0.936972  |
| Pank2            | 4.09367   | 4.18296    | 0.0311294     | 0.775482  | 0.923807  |
| Smox             | 0         | 0.121098   | 1.79769e+308  | 0.0318636 | 1         |
| Smox_j1          | 0.206198  | 0.121245   | -0.766098     | 0.357931  | 0.693676  |
| Smox_j2          | 0.546735  | 0.532406   | -0.0383147    | 0.937215  | 0.980745  |
| Cds2             | 81.6002   | 71.1895    | 0             | 1         | 1         |
| Chgb_j1          | 0.230802  | 0.0664676  | -1.79593      | 0.0819345 | 0.348758  |
| Chgb             | 28.5981   | 21.071     | -0.440661     | 7.68E-06  | 0.000246  |
| Chgb_j5          | 0.301175  | 0.195833   | -0.62098      | 0.346034  | 0.68522   |
| Mcm8             | 0.276166  | 0.234472   | 0             | 1         | 1         |
| Crls1            | 7.81611   | 8.17111    | 0.0640825     | 0.573548  | 0.827691  |
| Bmp2             | 0.276473  | 0.105859   | -1.385        | 0.0105266 | 0.0888226 |
| Bmp2_j2          | 0.0657836 | 0.0924639  | 0.491163      | 0.614031  | 1         |
| Plcb1            | 0.56716   | 0.290252   | 0             | 1         | 1         |
| Plcb1            | 1.50696   | 1.04552    | 0             | 1         | 1         |
| Plcb1_j3         | 2.35852   | 2.32099    | 0             | 1         | 1         |
| Plcb4_j1         | 2.0407    | 2.63616    | 0             | 1         | 1         |
| 6330527O06Rik_j2 | 0.131174  | 0          | -1.79769e+308 | 0.0266535 | 1         |
| Snap25           | 427.32    | 296.949    | -0.525099     | 7.95E-09  | 5.62E-07  |
| 2210009G21Rik_j1 | 0.874837  | 0.950047   | 0.118983      | 0.567513  | 0.824883  |
| Btbd3            | 2.74823   | 2.18717    | 0             | 1         | 1         |
| Btbd3            | 13.3922   | 10.1859    | 0             | 1         | 1         |
| lsm1             | 0.986183  | 0.932651   | -0.0805184    | 0.677742  | 0.878835  |
| 2310003L22Rik    | 11.0854   | 12.8597    | 0.2142        | 0.133775  | 0.455157  |
| Macro2_j1        | 1.00794   | 0.274082   | -1.87873      | 0.123386  | 0.437384  |
| Macro2           | 3.23634   | 3.01864    | -0.100464     | 0.661126  | 0.871504  |
| Macro2_j4        | 0.426559  | 0.117962   | -1.85442      | 0.207304  | 0.551795  |
| Macro2_j18       | 1.29762   | 0.552843   | -1.23092      | 0.0001322 | 0.0027132 |
| Macro2_j16       | 0         | 0.201414   | 1.79769e+308  | 0.0004154 | 0.0069818 |
| Snrpb2           | 5.64677   | 4.83526    | -0.223834     | 0.129343  | 0.448274  |
| Snrpb2_j1        | 17.8982   | 17.8701    | -0.002269     | 0.987372  | 0.996374  |
| Pcsk2            | 26.5825   | 21.2782    | 0             | 1         | 1         |
| Dstn             | 44.7048   | 45.9848    | 0             | 1         | 1         |

|                  |          |                 |            |           |           |
|------------------|----------|-----------------|------------|-----------|-----------|
| Dstn_j2          | 53.7086  | 60.4637         | 0          | 1         | 1         |
| Csrp2bp          | 5.70529  | 6.24752         | 0.130984   | 0.272548  | 0.621353  |
| LOC668917        | 0.155587 | 0.302242        | 0.95798    | 0.160347  | 0.494893  |
| LOC668917_j4     | 0.119073 | 0.105896        | -0.169197  | 0.864877  | 1         |
| LOC668917_j7     | 0.362994 | 0.0901105       | -2.01018   | 0.0458022 | 0.24486   |
| Sec23b           | 1.16443  | 1.0046          | 0          | 1         | 1         |
| Sec23b_j1        | 0.85736  | 1.30913         | 0          | 1         | 1         |
| Gm561            | 12.8273  | 14.9756         | 0.223395   | 0.154423  | 0.487616  |
| Dtd1             | 16.7959  | 17.8184         | 0          | 1         | 1         |
| Dtd1_j2          | 1.97711  | 0.330567        | 0          | 1         | 1         |
| Slc24a3          | 7.15111  | 6.51557         | -0.134276  | 0.259833  | 0.608517  |
| Rin2_j7          | 1.21878  | 0.354991        | -1.77959   | 3.77E-07  | 1.73E-05  |
| 4930529M08Rik_j5 | 0.883089 | 0.632018        | -0.482593  | 0.451601  | 0.756717  |
| 4930529M08Rik_j7 | 1.55852  | 1.50229         | -0.05301   | 0.891435  | 0.965687  |
| Insm1            | 3.47173  | 3.41186         | -0.0250964 | 0.873741  | 0.959888  |
| Plk1s1           | 7.45032  | 6.48407         | -0.200403  | 0.130713  | 0.450142  |
| Xrn2             | 8.30708  | 9.27227         | 0.158582   | 0.143115  | 0.470125  |
| Nxt1             | 0.749978 | 0.598533        | -0.325416  | 0.352573  | 0.689448  |
| Nxt1             | 1.5118   | 1.72073         | 0.186755   | 0.395504  | 0.720576  |
| XLOC_018445      | 0.032537 | 0.0498497       | 0.615502   | 0.69721   | 1         |
| Gzf1             | 1.30669  | 0.871447        | 0          | 1         | 1         |
| Cstl1_j2         | 0.216668 | 0.162914        | 0          | 1         | 1         |
| Cstl1_j6         | 0.191533 | 0.0287758       | 0          | 1         | 1         |
| Tmem90b          | 0.704039 | 0.572076        | -0.299447  | 0.443563  | 0.751387  |
| Tmem90b_j1       | 2.06303  | 1.89858         | -0.119841  | 0.614147  | 0.847685  |
| Entpd6_j1        | 0.50323  | 0.257203        | -0.968309  | 0.114979  | 0.421857  |
| Entpd6_j2        | 1.91594  | 1.96979         | 0.0399907  | 0.869571  | 0.958475  |
| Pygb             | 1.4158   | 1.50661         | 0.0896966  | 0.537977  | 0.807846  |
| Pygb_j3          | 0.137718 | 0.147047        | 0.0945614  | 0.89528   | 0.966918  |
| Gins1_j1         | 0.260667 | 0.236878        | -0.138061  | 0.874161  | 0.959954  |
| Gins1            | 1.45501  | 1.35511         | -0.102621  | 0.720978  | 0.900148  |
| Nsfl1c_j3        | 1.44336  | 0 -1.79769e+308 |            | 1.51E-23  | 4.63E-21  |
| Nsfl1c_j4        | 0.758777 | 1.27688         | 0.750875   | 0.028593  | 0.179892  |
| Fkbp1a           | 3.75136  | 2.76029         | -0.442596  | 0.0541856 | 0.271315  |
| Fkbp1a_j5        | 0.544233 | 0.606384        | 0.156006   | 0.765389  | 0.919757  |
| 5430405G05Rik    | 0.733042 | 0.999653        | 0.44753    | 0.252845  | 0.600908  |
| 5430405G05Rik_j4 | 0.244657 | 0 -1.79769e+308 |            | 0.0105509 | 0.0889661 |
| 5430405G05Rik_j5 | 0.130286 | 0.186384        | 0.516599   | 0.642416  | 0.862006  |
| Rspo4            | 2.25565  | 1.83815         | -0.295286  | 0.052503  | 0.266169  |
| 2310046K01Rik    | 2.37261  | 1.88832         | -0.32937   | 0.0885587 | 0.364628  |
| Scrt2_j2         | 0.895588 | 0 -1.79769e+308 |            | 2.70E-13  | 4.26E-11  |
| Srxn1            | 186.254  | 304.127         | 0.7074     | 3.11E-15  | 6.31E-13  |
| Csnk2a1_j3       | 3.33266  | 3.1168          | -0.096609  | 0.369916  | 0.703412  |
| Tbc1d20          | 8.98941  | 9.40988         | 0          | 1         | 1         |
| Tbc1d20_j2       | 0.578298 | 1.65739         | 0          | 1         | 1         |
| 6820408C15Rik_j3 | 0.28778  | 0.104067        | -1.46746   | 0.206975  | 0.551484  |
| 6820408C15Rik_j4 | 0.572351 | 0.293569        | -0.9632    | 0.0996542 | 0.390857  |

|                  |           |                 |            |           |           |
|------------------|-----------|-----------------|------------|-----------|-----------|
| H13              | 33.9741   | 34.0092         | 0          | 1         | 1         |
| H13              | 8.88724   | 11.0063         | 0          | 1         | 1         |
| H13_j1           | 8.24995   | 9.71607         | 0          | 1         | 1         |
| Id1              | 7.88364   | 7.22241         | -0.126381  | 0.444371  | 0.752081  |
| Cox4i2           | 0.780923  | 0.867725        | 0.152057   | 0.652788  | 0.867147  |
| Tpx2_j2          | 0.0835474 | 0.0321757       | -1.37662   | 0.221915  | 1         |
| Tpx2             | 0.201591  | 0.0407197       | -2.30764   | 0.0154907 | 0.117492  |
| Ttll9_j1         | 0.524048  | 0.436321        | 0          | 1         | 1         |
| Xkr7             | 0.637012  | 0.733587        | 0          | 1         | 1         |
| BC020535_j1      | 0.345333  | 0.296799        | -0.218503  | 0.70121   | 0.890242  |
| BC020535_j4      | 0.285014  | 0 -1.79769e+308 | 0.0001215  | 0.0025272 |           |
| BC020535_j5      | 0.214276  | 0.14485         | -0.56491   | 0.498951  | 0.784243  |
| BC020535_j7      | 0.248906  | 0.0794506       | -1.64747   | 0.160491  | 0.495096  |
| Hck              | 0.455275  | 0.836857        | 0          | 1         | 1         |
| Tm9sf4           | 5.01932   | 5.21545         | 0          | 1         | 1         |
| Tm9sf4_j1        | 9.76221   | 8.62198         | 0          | 1         | 1         |
| Pofut1           | 1.54303   | 1.43017         | -0.109586  | 0.495909  | 0.78296   |
| Kif3b            | 8.52237   | 7.02225         | 0          | 1         | 1         |
| Asxl1            | 3.45301   | 3.07318         | 0          | 1         | 1         |
| Asxl1_j1         | 0.112475  | 0               | 0          | 1         | 1         |
| Asxl1_j2         | 4.30417   | 4.69587         | 0          | 1         | 1         |
| Mapre1           | 23.973    | 24.7917         | 0.0484518  | 0.573719  | 0.827772  |
| Gm14495_j2       | 0.149265  | 0.051353        | -1.53935   | 0.183132  | 0.523669  |
| U46068           | 0.119386  | 0.111666        | -0.0964486 | 0.903985  | 1         |
| U46068_j2        | 0.103087  | 0.0695319       | -0.568117  | 0.611345  | 1         |
| 1700003F12Rik    | 0.77408   | 0.695496        | 0          | 1         | 1         |
| 1700003F12Rik_j1 | 0.0629608 | 0.0463948       | 0          | 1         | 1         |
| Zfp341           | 1.65918   | 1.32206         | -0.327683  | 0.106849  | 0.406092  |
| Chmp4b           | 86.2755   | 94.3963         | 0.129779   | 0.136251  | 0.45927   |
| Chmp4b_j2        | 38.3451   | 53.2887         | 0.474786   | 0.0006136 | 0.0096739 |
| Raly_j1          | 0.103616  | 0 -1.79769e+308 | 0.0313532  | 1         |           |
| Raly             | 5.78268   | 4.80127         | -0.268322  | 0.0234164 | 0.156933  |
| Raly_j4          | 13.8775   | 13.3536         | -0.05552   | 0.697772  | 0.888632  |
| Itch             | 6.14042   | 5.27329         | 0          | 1         | 1         |
| Itch_j1          | 0.62941   | 0.60165         | 0          | 1         | 1         |
| Itch_j3          | 6.4796    | 5.09685         | 0          | 1         | 1         |
| Map1lc3a         | 15.8662   | 18.4422         | 0.217054   | 0.018163  | 0.131804  |
| Trp53inp2        | 24.4828   | 31.4732         | 0.362356   | 6.88E-05  | 0.0015662 |
| Myh7b_j1         | 0.0504141 | 0.0410547       | 0          | 1         | 1         |
| Myh7b_j2         | 0.0365962 | 0.0696693       | 0          | 1         | 1         |
| Myh7b_j3         | 0.141113  | 0.00124093      | 0          | 1         | 1         |
| Myh7b_j10        | 0.101789  | 0.0253235       | 0          | 1         | 1         |
| Procr_j1         | 0.401335  | 1.11495         | 1.4741     | 0.000521  | 0.0084292 |
| Procr_j2         | 0.29321   | 0.543314        | 0.889852   | 0.118136  | 0.427877  |
| Procr            | 1.60847   | 4.98512         | 1.63194    | 5.33E-15  | 1.05E-12  |
| Mmp24            | 5.08565   | 5.12823         | 0.0120286  | 0.909333  | 0.971299  |
| Cep250_j3        | 0.395667  | 0.192367        | 0          | 1         | 1         |

|                  |           |            |            |           |           |
|------------------|-----------|------------|------------|-----------|-----------|
| Cep250_j6        | 0.138232  | 0.117381   | 0          | 1         | 1         |
| Ergic3_j6        | 32.0595   | 33.0319    | 0.0431081  | 0.672686  | 0.876452  |
| Ergic3           | 10.9278   | 12.8959    | 0.2389     | 0.0946463 | 0.379341  |
| Spag4_j3         | 0.313846  | 0.149561   | -1.06932   | 0.0881114 | 0.363421  |
| Spag4_j2         | 0.0657861 | 8.82E-06   | -12.8655   | 0.989316  | 1         |
| Spag4_j10        | 0.155278  | 0.137918   | -0.17105   | 0.814832  | 0.939608  |
| Romo1            | 11.416    | 13.517     | 0          | 1         | 1         |
| Epb4.1l1_j7      | 0.129485  | 0.0611888  | 0          | 1         | 1         |
| Epb4.1l1_j10     | 1.86277   | 1.91488    | 0          | 1         | 1         |
| 0610011L14Rik_j4 | 0.149736  | 0.0945383  | -0.663452  | 0.304007  | 0.649734  |
| Dlgap4           | 21.238    | 20.9373    | -0.0205723 | 0.843741  | 0.950584  |
| Myl9             | 1.57176   | 2.06419    | 0.393193   | 0.11087   | 0.414403  |
| 1110008F13Rik    | 2.31845   | 2.13175    | -0.121119  | 0.528099  | 0.80195   |
| 1110008F13Rik_j2 | 2.09277   | 2.33717    | 0.15935    | 0.705142  | 0.892225  |
| Gm1332_j1        | 0.150538  | 0.198977   | 0.40247    | 0.520785  | 0.797932  |
| Rpn2_j1          | 27.3671   | 27.47      | 0          | 1         | 1         |
| Rpn2_j2          | 21.0066   | 17.3729    | 0          | 1         | 1         |
| Manbal           | 8.73912   | 9.82121    | 0.168413   | 0.115676  | 0.423182  |
| Src_j2           | 1.18032   | 0.774356   | 0          | 1         | 1         |
| Src              | 1.39685   | 0.908455   | 0          | 1         | 1         |
| Src_j6           | 0.0733643 | 0          | 0          | 1         | 1         |
| Src_j9           | 0.452374  | 0.556805   | 0          | 1         | 1         |
| Peg5_j2          | 0.134076  | 0.00239359 | 0          | 1         | 1         |
| Peg5_j1          | 0.0123929 | 0.0539982  | 0          | 1         | 1         |
| Ctnnbl1_j1       | 4.36609   | 3.05771    | -0.513891  | 0.003331  | 0.037423  |
| Ctnnbl1          | 14.2441   | 14.8001    | 0.0552392  | 0.634387  | 0.858242  |
| Vstm2l           | 58.6274   | 49.0843    | -0.256315  | 0.0073171 | 0.0681226 |
| Vstm2l_j1        | 1.93265   | 3.24455    | 0.747441   | 0.0469527 | 0.24858   |
| Rprd1b           | 0.884886  | 0.658872   | 0          | 1         | 1         |
| Rprd1b_j1        | 0.0529276 | 0.0778748  | 0          | 1         | 1         |
| Lbp              | 1.19154   | 1.83111    | 0.619884   | 0.0083028 | 0.0746742 |
| Snhg11_j5        | 92.0508   | 91.3177    | -0.0115344 | 0.893265  | 0.966313  |
| Snhg11_j4        | 14.8891   | 14.5937    | -0.0289176 | 0.790383  | 0.930178  |
| Snhg11_j3        | 31.0311   | 25.8407    | -0.264067  | 0.0060279 | 0.0587582 |
| Ralgapb          | 3.3723    | 0.620933   | -2.44122   | 0         | 0         |
| Ralgapb_j3       | 1.09972   | 1.75205    | 0.671903   | 0.0020859 | 0.0258502 |
| Actr5            | 0.0991771 | 0.203773   | 1.03888    | 0.0280284 | 0.177633  |
| Actr5_j2         | 0.452188  | 0.490254   | 0.116605   | 0.756695  | 0.916122  |
| Ppp1r16b         | 1.19879   | 0.517403   | -1.21222   | 4.16E-07  | 1.90E-05  |
| Fam83d           | 1.12365   | 0.641683   | -0.808262  | 0.0073344 | 0.0682184 |
| Dhx35_j1         | 2.7661    | 2.5151     | 0          | 1         | 1         |
| Dhx35_j3         | 2.4535    | 3.48254    | 0          | 1         | 1         |
| XLOC_018534      | 0.19603   | 0.061702   | -1.66768   | 0.0081725 | 0.0737735 |
| Top1             | 10.6023   | 10.7289    | 0.0171328  | 0.868886  | 0.958389  |
| Plcg1_j1         | 3.31648   | 3.06193    | -0.115211  | 0.424421  | 0.739871  |
| XLOC_018538      | 0.2049    | 0.413448   | 1.01279    | 0.121373  | 0.433925  |
| XLOC_018538      | 0.158736  | 0.0349205  | -2.18448   | 0.230461  | 0.577483  |

|                  |           |                 |             |           |           |
|------------------|-----------|-----------------|-------------|-----------|-----------|
| Gm11448          | 2.92337   | 3.11099         | 0.0897399   | 0.711957  | 0.895487  |
| 9430021M05Rik_j5 | 1.98308   | 1.5509          | -0.35464    | 0.183905  | 0.524554  |
| 9430021M05Rik_j7 | 1.3189    | 0.448253        | -1.55695    | 0.0029769 | 0.0342529 |
| Srsf6_j1         | 6.62391   | 8.99224         | 0           | 1         | 1         |
| Srsf6            | 3.74939   | 3.09616         | 0           | 1         | 1         |
| L3mbtl_j3        | 0.468154  | 0.307981        | -0.604143   | 0.15298   | 0.48502   |
| L3mbtl_j11       | 0.206479  | 0.047913        | -2.1075     | 0.0397704 | 0.222986  |
| L3mbtl_j15       | 0.80913   | 0.551736        | -0.552394   | 0.122452  | 0.435577  |
| Ift52            | 6.96051   | 6.61075         | -0.0743782  | 0.467778  | 0.766747  |
| Tox2_j2          | 1.56591   | 0.00287479      | 0           | 1         | 1         |
| Tox2_j4          | 1.64796   | 1.33422         | 0           | 1         | 1         |
| Gdap1l1_j2       | 0.429648  | 2.8842          | 2.74694     | 9.17E-11  | 9.42E-09  |
| Gdap1l1_j1       | 6.60367   | 6.69116         | 0.0189892   | 0.915438  | 0.973599  |
| Gdap1l1          | 24.256    | 29.4206         | 0.278482    | 0.0048089 | 0.0492395 |
| Gdap1l1_j3       | 2.94628   | 2.84614         | -0.0498874  | 0.831297  | 0.945549  |
| XLOC_018552      | 0.268291  | 0.220279        | -0.284465   | 0.494738  | 0.782608  |
| Ttpal            | 0.220301  | 0.258888        | 0.23285     | 0.472582  | 0.769633  |
| Pkig             | 15.0368   | 17.4774         | 0.216997    | 0.172419  | 0.509941  |
| Ywhab            | 267.518   | 272.118         | 0.0245938   | 0.78643   | 0.928634  |
| Pabpc1l_j1       | 0.126417  | 0.0478923       | -1.40033    | 0.297278  | 1         |
| Stk4             | 4.58412   | 3.91013         | 0           | 1         | 1         |
| Sys1             | 1.44185   | 1.59144         | 0           | 1         | 1         |
| Sys1             | 1.36091   | 1.55862         | 0           | 1         | 1         |
| Dbnnd2           | 6.04237   | 6.72288         | 0           | 1         | 1         |
| Dbnnd2           | 9.78704   | 14.1319         | 0           | 1         | 1         |
| Pigt             | 0.954372  | 0.884144        | -0.11027    | 0.752685  | 0.914482  |
| AK043662         | 0.106936  | 0.116863        | 0.128067    | 0.864377  | 1         |
| AK043662_j1      | 0.128276  | 0.100286        | -0.355135   | 0.645247  | 1         |
| Wfdc2_j2         | 0.284865  | 0.131928        | -1.11052    | 0.387778  | 0.715426  |
| Wfdc2            | 1.55532   | 1.08515         | -0.519314   | 0.14914   | 0.478226  |
| Dnnttip1         | 3.69682   | 4.84609         | 0.390538    | 0.002334  | 0.0282012 |
| Ube2c            | 0.500377  | 0.768432        | 0.618901    | 0.0965252 | 0.383809  |
| Snx21_j1         | 1.35348   | 1.57042         | 0           | 1         | 1         |
| Snx21_j8         | 0.94833   | 0.923569        | 0           | 1         | 1         |
| Zswim3           | 1.85785   | 2.2668          | 0           | 1         | 1         |
| Ctsa             | 1.10684   | 1.2723          | 0.201001    | 0.466936  | 0.766531  |
| Pcif1_j3         | 1.20401   | 1.23615         | 0.0380084   | 0.847389  | 0.951757  |
| Mmp9_j1          | 0.0936899 | 0.0690542       | -0.440165   | 0.623309  | 1         |
| Slc12a5_j1       | 0.128841  | 0 -1.79769e+308 |             | 0.0038206 | 1         |
| Slc2a10_j1       | 0.132608  | 0.101982        | -0.37886    | 0.688905  | 1         |
| Eya2             | 1.22574   | 1.2264          | 0.000777408 | 0.997625  | 0.999228  |
| Eya2             | 1.0807    | 0.508911        | -1.08648    | 0.0062711 | 0.0606321 |
| Trp53rk          | 1.57952   | 1.55585         | -0.0217825  | 0.919762  | 0.97481   |
| Arfgef2          | 7.64218   | 5.70584         | 0           | 1         | 1         |
| Arfgef2_j1       | 0.457491  | 0.228917        | 0           | 1         | 1         |
| Cse1l            | 7.27012   | 7.05785         | 0           | 1         | 1         |
| Ddx27            | 7.75517   | 8.49279         | 0.131079    | 0.264839  | 0.613751  |

|                       |           |                 |            |           |           |
|-----------------------|-----------|-----------------|------------|-----------|-----------|
| Slc9a8_j1             | 6.41406   | 6.53933         | 0.0279065  | 0.853155  | 0.953428  |
| Rnf114                | 4.0318    | 3.05364         | 0          | 1         | 1         |
| Rnf114                | 1.0156    | 1.07446         | 0          | 1         | 1         |
| Rnf114_j2             | 0.199648  | 0.862836        | 0          | 1         | 1         |
| Ptpn1                 | 9.98315   | 14.0375         | 0.491714   | 6.03E-07  | 2.67E-05  |
| Pard6b                | 0.401534  | 0.413358        | 0          | 1         | 1         |
| Pard6b_j4             | 0.778465  | 0.756157        | 0          | 1         | 1         |
| XLOC_018596           | 0.128079  | 0.0470214       | -1.44565   | 0.0624417 | 1         |
| XLOC_018599           | 0.147933  | 0.163695        | 0.146067   | 0.768686  | 0.921133  |
| Gm9873                | 0.180249  | 0.273841        | 0.603349   | 0.271079  | 0.620091  |
| XLOC_018599           | 0.127434  | 0.0898177       | -0.504678  | 0.447559  | 1         |
| Tshz2_j1              | 1.88228   | 1.2282          | 0          | 1         | 1         |
| Tshz2_j5              | 1.40247   | 0.318285        | 0          | 1         | 1         |
| Pfdn4                 | 2.67725   | 2.54059         | -0.0755887 | 0.779527  | 0.925607  |
| Pfdn4_j3              | 0.811197  | 0.395544        | -1.03621   | 0.389862  | 0.716946  |
| Gm14637_j1            | 0.11683   | 0.122743        | 0.0712242  | 0.921443  | 1         |
| Dok5                  | 2.49612   | 2.33167         | -0.0983245 | 0.658931  | 0.870368  |
| BC049717_j1           | 0.0931741 | 0 -1.79769e+308 |            | 0.0139125 | 1         |
| Gm14273_j2            | 0.0771534 | 0.188488        | 1.28867    | 0.120351  | 0.43198   |
| Gm14273_j4            | 0.27805   | 0.359778        | 0.371761   | 0.611061  | 0.846733  |
| 2010011I20Rik         | 2.91323   | 4.30576         | 0          | 1         | 1         |
| Cstf1                 | 2.6544    | 2.34327         | 0          | 1         | 1         |
| Cstf1                 | 3.67819   | 4.07894         | 0          | 1         | 1         |
| 2410001C21Rik         | 18.9759   | 18.5574         | 0          | 1         | 1         |
| 1700029J11Rik         | 0.0984593 | 0.155036        | 0.655004   | 0.315725  | 1         |
| Rae1                  | 12.0102   | 13.8997         | 0.210789   | 0.0808121 | 0.346067  |
| Rbm38                 | 0.708311  | 0.902232        | 0.349117   | 0.282379  | 0.630923  |
| AK079954_j1           | 0.285826  | 0.262867        | -0.120802  | 0.697217  | 0.888506  |
| AK079954_j3           | 0.113426  | 0.119446        | 0.0746162  | 0.93357   | 1         |
| Rab22a                | 6.54351   | 7.12315         | 0.122449   | 0.225614  | 0.572661  |
| Vapb_j1               | 4.95871   | 3.67612         | -0.431782  | 0.0015174 | 0.0199144 |
| Stx16                 | 0.169551  | 0.574166        | 1.75975    | 0.0002525 | 0.0046577 |
| Stx16                 | 7.82123   | 6.08835         | -0.361346  | 0.0066493 | 0.0632836 |
| Npepl1_j1             | 2.83599   | 3.49165         | 0          | 1         | 1         |
| Npepl1                | 8.60948   | 9.41681         | 0          | 1         | 1         |
| Gnas                  | 82.4186   | 79.7696         | 0          | 1         | 1         |
| Gnas_j2               | 397.673   | 484.391         | 0          | 1         | 1         |
| Gnas_j4               | 792.202   | 800.916         | 0          | 1         | 1         |
| Th1l                  | 20.4249   | 22.4468         | 0.136185   | 0.160748  | 0.495357  |
| OTTMUSG00000016609_j2 | 6.30158   | 7.08404         | 0.168859   | 0.570047  | 0.826128  |
| OTTMUSG00000016609_j3 | 3.1168    | 0.984481        | -1.66263   | 0.0799271 | 0.343618  |
| Gm14322_j1            | 5.81274   | 3.79039         | -0.616872  | 2.63E-08  | 1.68E-06  |
| Phactr3               | 6.99517   | 5.36811         | 0          | 1         | 1         |
| Phactr3_j2            | 5.60722   | 7.70867         | 0          | 1         | 1         |
| 9030418K01Rik_j2      | 0.0487324 | 0.183263        | 0          | 1         | 1         |
| Cdh26_j1              | 0.135068  | 0.0827048       | -0.707643  | 0.542285  | 1         |
| 4921531C22Rik         | 0.326165  | 0.508019        | 0.639283   | 0.0162188 | 0.121626  |

|                  |           |                 |           |           |           |
|------------------|-----------|-----------------|-----------|-----------|-----------|
| Lsm14b_j1        | 24.9018   | 30.7102         | 0.30247   | 0.001082  | 0.0152025 |
| Ss18l1           | 1.52742   | 1.60045         | 0         | 1         | 1         |
| Gtpbp5_j4        | 1.74292   | 2.02872         | 0.219066  | 0.41966   | 0.73634   |
| Gtpbp5_j1        | 0.928923  | 0.63391         | -0.55128  | 0.25459   | 0.602805  |
| Gtpbp5_j8        | 0.7931    | 0.68998         | -0.200948 | 0.74443   | 0.910803  |
| Osbpl2_j2        | 6.44611   | 6.35136         | 0         | 1         | 1         |
| Osbpl2_j4        | 7.97455   | 6.76909         | 0         | 1         | 1         |
| Osbpl2_j3        | 6.35578   | 5.63015         | 0         | 1         | 1         |
| Adrm1_j3         | 0.291278  | 0.641455        | 1.13895   | 0.006204  | 0.0601382 |
| Adrm1_j2         | 1.75063   | 1.96468         | 0.166421  | 0.403755  | 0.726553  |
| Rps21            | 26.1556   | 29.5788         | 0.177439  | 0.258996  | 0.607774  |
| Slco4a1_j2       | 0.184774  | 0 -1.79769e+308 |           | 0.0004707 | 0.0077362 |
| 1600027N09Rik_j3 | 1.55167   | 3.0027          | 0         | 1         | 1         |
| 1600027N09Rik    | 0.805712  | 0.86897         | 0         | 1         | 1         |
| 1600027N09Rik_j6 | 3.3412    | 4.02354         | 0         | 1         | 1         |
| Ogfr             | 1.55635   | 1.78926         | 0.201198  | 0.285747  | 0.634532  |
| Ogfr_j1          | 9.98983   | 11.3353         | 0.182285  | 0.122343  | 0.435497  |
| Col9a3           | 0.30754   | 0.332958        | 0.114569  | 0.741825  | 0.909485  |
| 2310003C23Rik    | 11.448    | 10.6583         | -0.103123 | 0.303358  | 0.649038  |
| XLOC_018660      | 0.0941817 | 0.159978        | 0.764359  | 0.383857  | 0.71322   |
| XLOC_018660      | 0.0738023 | 3.73E-05        | -10.9514  | 0.969377  | 1         |
| Rtel1_j1         | 0.824433  | 0.638218        | 0         | 1         | 1         |
| Rtel1            | 1.53647   | 1.82501         | 0         | 1         | 1         |
| Rtel1_j3         | 1.56995   | 1.76579         | 0         | 1         | 1         |
| Zgpat_j1         | 0.0981529 | 0.13367         | 0         | 1         | 1         |
| Zgpat_j9         | 1.08384   | 1.14321         | 0         | 1         | 1         |
| Tpd52l2_j1       | 5.67182   | 6.55966         | 0         | 1         | 1         |
| Tpd52l2_j2       | 1.83839   | 2.02636         | 0         | 1         | 1         |
| Dnajc5_j3        | 25.0261   | 21.2561         | 0         | 1         | 1         |
| Prpf6            | 17.2542   | 17.5684         | 0         | 1         | 1         |
| XLOC_018666      | 0.0935692 | 0.0237002       | -1.98113  | 0.351683  | 1         |
| Tcea2_j1         | 4.15552   | 2.46686         | 0         | 1         | 1         |
| Tcea2_j7         | 0.775282  | 1.02484         | 0         | 1         | 1         |
| Oprl1            | 4.52912   | 3.21917         | 0         | 1         | 1         |
| Myt1_j2          | 0.128573  | 0 -1.79769e+308 |           | 2.10E-07  | 1         |
| Myt1_j6          | 0.064539  | 0 -1.79769e+308 |           | 1.72E-08  | 1         |
| Polr3k           | 5.85931   | 5.97287         | 0.0276923 | 0.82452   | 0.943346  |
| Rpp38            | 0.828589  | 0.815658        | 0         | 1         | 1         |
| Meig1            | 0.398186  | 0.590636        | 0         | 1         | 1         |
| Hspa14           | 10.9243   | 11.0912         | 0.0218738 | 0.853634  | 0.953747  |
| Prpf18_j1        | 10.6519   | 9.63768         | 0         | 1         | 1         |
| Mcm10            | 0.0560606 | 0 -1.79769e+308 |           | 0.0501544 | 1         |
| Optn_j2          | 3.97763   | 3.84464         | 0         | 1         | 1         |
| Optn_j1          | 4.88666   | 5.51899         | 0         | 1         | 1         |
| Optn             | 8.09464   | 8.35043         | 0         | 1         | 1         |
| Camk1d_j4        | 0.500946  | 0               | 0         | 1         | 1         |
| Camk1d           | 1.1324    | 0.683871        | 0         | 1         | 1         |



|                  |           |                 |            |           |           |
|------------------|-----------|-----------------|------------|-----------|-----------|
| Camk1d           | 1.99061   | 0.980328        | 0          | 1         | 1         |
| Cdc123           | 32.7294   | 31.4123         | -0.0592577 | 0.548502  | 0.814203  |
| Sec61a2          | 4.07068   | 3.88892         | -0.0659    | 0.613651  | 0.847685  |
| Dhtkd1_j1        | 0.112018  | 0 -1.79769e+308 |            | 7.01E-05  | 1         |
| Dhtkd1_j2        | 0.107928  | 0 -1.79769e+308 |            | 1.86E-05  | 1         |
| 5430407P10Rik_j1 | 0.0485294 | 0 -1.79769e+308 |            | 0.0187968 | 1         |
| 5430407P10Rik    | 0.13765   | 0.0861363       | -0.676309  | 0.379876  | 0.711076  |
| Celf2_j7         | 0.88226   | 0.000764771     | 0          | 1         | 1         |
| Gm13217          | 3.41862   | 3.0572          | -0.161203  | 0.434407  | 0.745518  |
| Taf3             | 2.57104   | 2.44853         | -0.0704363 | 0.616345  | 0.848764  |
| Atp5c1_j3        | 0.843205  | 0.228596        | -1.88308   | 0.0367862 | 0.212162  |
| Atp5c1           | 20.349    | 17.8168         | -0.191716  | 0.111669  | 0.415918  |
| Pfkfb3_j3        | 2.88748   | 1.32345         | 0          | 1         | 1         |
| Pfkfb3           | 7.33509   | 7.7122          | 0          | 1         | 1         |
| Pfkfb3           | 4.51629   | 5.38649         | 0          | 1         | 1         |
| Pfkfb3_j4        | 1.43492   | 1.29886         | 0          | 1         | 1         |
| Rbm17            | 13.251    | 14.1156         | 0.0911867  | 0.44973   | 0.755756  |
| Fbxo18_j1        | 3.05611   | 4.04808         | 0          | 1         | 1         |
| Fbxo18_j4        | 1.12367   | 0.36073         | 0          | 1         | 1         |
| Fbxo18_j2        | 0.470255  | 0               | 0          | 1         | 1         |
| Fam188a          | 28.7235   | 22.6826         | 0          | 1         | 1         |
| C1ql3            | 1.8235    | 1.63924         | -0.15368   | 0.382256  | 0.712312  |
| Rsu1             | 31.3337   | 27.0666         | 0          | 1         | 1         |
| Trdmt1           | 0.673988  | 0.707688        | 0.0703911  | 0.82845   | 0.944579  |
| Ptpla_j1         | 0.136321  | 0.0132861       | -3.35902   | 0.0157712 | 1         |
| Ptpla_j4         | 0.269478  | 0.184031        | -0.550217  | 0.155174  | 0.488311  |
| Gm13320          | 2.37556   | 2.49031         | 0.0680558  | 0.816049  | 0.94021   |
| Nabl_j1          | 0.372977  | 0.638066        | 0.77462    | 0.0110409 | 0.0922047 |
| Nabl_j2          | 0.180192  | 0 -1.79769e+308 |            | 5.24E-08  | 3.06E-06  |
| Nabl             | 1.37463   | 1.02618         | -0.42176   | 0.007734  | 0.0709201 |
| Nabl_j2          | 0.403827  | 0.196095        | -1.04219   | 0.0676181 | 0.31119   |
| Nabl_j3          | 0.179769  | 0.340252        | 0.920463   | 0.0867331 | 0.360002  |
| A930004D18Rik_j2 | 0.213259  | 0.192304        | -0.14922   | 0.763966  | 0.91894   |
| A930004D18Rik_j1 | 0.237956  | 0.332501        | 0.482661   | 0.230745  | 0.57771   |
| Dnajc1           | 1.23324   | 1.20706         | -0.03095   | 0.811445  | 0.938053  |
| Pip4k2a_j2       | 2.59506   | 0               | 0          | 1         | 1         |
| Pip4k2a          | 20.0398   | 12.738          | 0          | 1         | 1         |
| Gm13328          | 13.0053   | 12.7949         | 0          | 1         | 1         |
| Arhgap21_j3      | 4.10699   | 4.20104         | 0          | 1         | 1         |
| Arhgap21_j6      | 1.34567   | 0.95968         | 0          | 1         | 1         |
| Arhgap21_j4      | 2.86486   | 1.97126         | 0          | 1         | 1         |
| Enkur            | 0.136008  | 0.344526        | 1.34092    | 0.042422  | 0.232811  |
| Abi1_j5          | 9.94182   | 8.87149         | 0          | 1         | 1         |
| Mastl            | 0.410275  | 0.356913        | 0          | 1         | 1         |
| Spopl_j5         | 1.65488   | 2.22163         | 0          | 1         | 1         |
| Spopl            | 2.08691   | 0.811223        | 0          | 1         | 1         |
| Hnmt             | 3.1408    | 1.01843         | -1.62478   | 1.02E-06  | 4.20E-05  |

|                  |           |           |               |           |           |
|------------------|-----------|-----------|---------------|-----------|-----------|
| Pax8_j4          | 0.100623  | 0         | -1.79769e+308 | 0.0060991 | 1         |
| Pax8_j5          | 0.347152  | 0.3512    | 0.0167223     | 0.968744  | 0.991159  |
| Gm13416          | 3.45631   | 3.17965   | -0.120366     | 0.458109  | 0.7608    |
| Cacna1b_j8       | 0.160979  | 0.358588  | 0             | 1         | 1         |
| Cacna1b_j11      | 0.0621471 | 0         | 0             | 1         | 1         |
| Cacna1b_j10      | 3.1245    | 3.19374   | 0             | 1         | 1         |
| Ehmt1_j6         | 0.164009  | 0.196636  | 0.261755      | 0.604107  | 0.843725  |
| Ehmt1            | 1.48886   | 0.633622  | -1.23252      | 2.04E-06  | 7.70E-05  |
| Arrdc1           | 9.8639    | 8.74575   | 0             | 1         | 1         |
| Arrdc1_j2        | 5.66396   | 6.57508   | 0             | 1         | 1         |
| Mrpl41_j1        | 15.0214   | 8.34395   | -0.848222     | 0.0005734 | 0.00914   |
| Mrpl41           | 8.91912   | 8.51366   | -0.0671218    | 0.616622  | 0.84894   |
| A830007P12Rik    | 0.213821  | 0.246288  | 0.203944      | 0.659331  | 0.870715  |
| Cobra1           | 25.453    | 27.266    | 0.0992673     | 0.292494  | 0.639479  |
| Tubb2c           | 22.1981   | 27.1483   | 0             | 1         | 1         |
| Ndor1_j1         | 0.339961  | 0.243789  | 0             | 1         | 1         |
| Ndor1            | 0.875214  | 0.157438  | 0             | 1         | 1         |
| Grin1_j6         | 0.381428  | 0.132325  | -1.52733      | 0.0182167 | 0.132057  |
| Dpp7_j3          | 10.3798   | 12.9837   | 0             | 1         | 1         |
| Uap1l1           | 6.78233   | 6.81055   | 0.00599054    | 0.965581  | 0.990085  |
| BC029214_j5      | 12.1437   | 12.584    | 0.0513875     | 0.730192  | 0.904705  |
| Ptgds_j2         | 11.0544   | 7.14332   | -0.62996      | 0.0007341 | 0.0111511 |
| Ptgds_j1         | 6.10058   | 3.68858   | -0.725883     | 0.0054293 | 0.0540236 |
| Traf2_j4         | 0.350235  | 0.194766  | -0.846583     | 0.0600905 | 0.288687  |
| Traf2            | 2.238     | 2.29168   | 0.0341927     | 0.817947  | 0.940936  |
| Mamdc4_j2        | 0.155663  | 0.0620544 | -1.32682      | 0.223001  | 0.570022  |
| Phpt1            | 16.1752   | 17.5235   | 0.115507      | 0.368448  | 0.701715  |
| Phpt1_j3         | 2.45537   | 0.914024  | -1.42564      | 9.49E-11  | 9.70E-09  |
| B230208H17Rik_j1 | 5.8001    | 5.37203   | 0             | 1         | 1         |
| B230208H17Rik    | 12.8872   | 10.9571   | 0             | 1         | 1         |
| Tmem141_j4       | 2.74213   | 1.24384   | 0             | 1         | 1         |
| Tmem141          | 5.40891   | 5.6389    | 0             | 1         | 1         |
| Tmem141          | 2.59861   | 2.38241   | 0             | 1         | 1         |
| Camsap1_j1       | 1.95499   | 3.92346   | 0             | 1         | 1         |
| Camsap1_j3       | 4.83413   | 4.72042   | 0             | 1         | 1         |
| Ubac1            | 27.7111   | 31.32     | 0.176624      | 0.0755214 | 0.331778  |
| Nacc2_j5         | 26.8995   | 24.609    | 0             | 1         | 1         |
| Nacc2            | 37.6748   | 25.927    | 0             | 1         | 1         |
| Qsox2            | 4.77089   | 4.95156   | 0.0536266     | 0.666927  | 0.873997  |
| Card9_j1         | 1.072     | 1.21843   | 0             | 1         | 1         |
| Card9_j2         | 2.15995   | 2.90513   | 0             | 1         | 1         |
| Notch1_j4        | 0.33756   | 0.166697  | -1.01791      | 0.006404  | 0.061569  |
| Notch1           | 0.903353  | 1.08685   | 0.266786      | 0.14629   | 0.474549  |
| Agpat2_j3        | 0.563686  | 0.174964  | -1.68783      | 0.0849262 | 0.355652  |
| Agpat2           | 0.318509  | 0.371034  | 0.220218      | 0.396273  | 0.721006  |
| Snhg7            | 2.2755    | 2.61832   | 0.202456      | 0.495063  | 0.782736  |
| Surf6            | 4.97401   | 6.20405   | 0.3188        | 0.0133028 | 0.105757  |

|                  |           |                 |            |           |           |
|------------------|-----------|-----------------|------------|-----------|-----------|
| Surf1_j2         | 0.480454  | 0.363609        | -0.402009  | 0.112865  | 0.418139  |
| Rexo4            | 8.82533   | 9.5256          | 0.11016    | 0.364764  | 0.698781  |
| Slc2a6_j1        | 0.355844  | 0.328419        | 0          | 1         | 1         |
| Slc2a6           | 8.83832   | 9.28885         | 0          | 1         | 1         |
| Tmem8c           | 0.62489   | 0.551449        | -0.180374  | 0.630271  | 0.856283  |
| Fam163b          | 1.02356   | 0.567415        | -0.851125  | 0.0047236 | 0.0485971 |
| Fam163b_j1       | 0.66135   | 0.214976        | -1.62124   | 0.0020281 | 0.0252558 |
| Sardh_j1         | 0.0830487 | 0.0478118       | -0.796589  | 0.430705  | 1         |
| VAV2_j10         | 0.657639  | 1.12233         | 0          | 1         | 1         |
| VAV2_j11         | 0.460738  | 0               | 0          | 1         | 1         |
| VAV2_j12         | 2.16953   | 2.3428          | 0          | 1         | 1         |
| VAV2_j2          | 0.828141  | 0.547824        | 0          | 1         | 1         |
| Brd3_j1          | 0.263137  | 0               | 0          | 1         | 1         |
| Brd3_j6          | 0.621074  | 0.557151        | 0          | 1         | 1         |
| Gm13373_j3       | 0.586778  | 0.396694        | -0.564786  | 0.0191687 | 0.136921  |
| 1700007K13Rik    | 0.423931  | 0.233148        | -0.862582  | 0.0967193 | 0.384126  |
| Gtf3c5_j1        | 2.78979   | 4.12243         | 0          | 1         | 1         |
| Gtf3c5           | 4.61086   | 4.00289         | 0          | 1         | 1         |
| Ntng2_j6         | 7.36182   | 5.52884         | 0          | 1         | 1         |
| Ntng2_j7         | 0.550826  | 0.289032        | 0          | 1         | 1         |
| Ntng2_j1         | 4.79045   | 3.43658         | 0          | 1         | 1         |
| Ntng2_j4         | 2.44709   | 1.68486         | 0          | 1         | 1         |
| Trub2_j1         | 0.93137   | 0.707047        | 0          | 1         | 1         |
| Trub2            | 3.15911   | 3.14342         | 0          | 1         | 1         |
| Wdr34            | 5.64985   | 5.33359         | -0.0831062 | 0.568045  | 0.825218  |
| Zer1             | 1.78554   | 0.585255        | 0          | 1         | 1         |
| D2Wsu81e_j3      | 0.0592992 | 0.0510328       | 0          | 1         | 1         |
| D2Wsu81e         | 4.20463   | 5.48331         | 0          | 1         | 1         |
| Ccbl1            | 0.204662  | 0 -1.79769e+308 |            | 0.0009095 | 0.0132606 |
| Ccbl1            | 1.86916   | 1.62812         | -0.199189  | 0.39686   | 0.721313  |
| Sh3glb2_j2       | 42.348    | 40.555          | 0          | 1         | 1         |
| Sh3glb2_j4       | 16.1604   | 13.9978         | 0          | 1         | 1         |
| Crat             | 1.82689   | 1.56885         | 0          | 1         | 1         |
| XLOC_018806      | 0.124336  | 0.0954382       | -0.381604  | 0.603171  | 1         |
| 1700001O22Rik_j1 | 0.260835  | 0 -1.79769e+308 |            | 0.0012484 | 0.0170681 |
| Asb6_j2          | 0.0761582 | 0 -1.79769e+308 |            | 0.0296124 | 1         |
| Asb6             | 8.92303   | 9.45765         | 0.0839482  | 0.459439  | 0.761406  |
| Ptges            | 2.80819   | 2.87595         | 0.0343984  | 0.811636  | 0.938187  |
| BC005624_j1      | 5.64738   | 5.77198         | 0.0314847  | 0.745443  | 0.911284  |
| Fnbp1_j7         | 3.74864   | 2.98437         | 0          | 1         | 1         |
| Fnbp1_j1         | 0.844765  | 0               | 0          | 1         | 1         |
| Fnbp1            | 9.3455    | 6.26508         | 0          | 1         | 1         |
| Fibcd1_j2        | 0.187904  | 0 -1.79769e+308 |            | 1.66E-07  | 8.37E-06  |
| Fam78a           | 0.0686374 | 0.0602445       | -0.188164  | 0.846927  | 1         |
| Uck1_j4          | 0.0287983 | 0.0516618       | 0.843115   | 0.470246  | 1         |
| Dnm1_j2          | 0.850733  | 0.7004          | 0          | 1         | 1         |
| Dnm1_j1          | 0.250265  | 0.193998        | 0          | 1         | 1         |

|               |           |                 |            |           |           |
|---------------|-----------|-----------------|------------|-----------|-----------|
| Dnm1_j15      | 0.983492  | 0.602553        | 0          | 1         | 1         |
| 1110008P14Rik | 131.929   | 125.043         | -0.0773414 | 0.40432   | 0.726779  |
| Lcn2          | 1.32066   | 0.908705        | -0.539371  | 0.120994  | 0.433078  |
| Slc25a25_j1   | 16.6393   | 14.0981         | 0          | 1         | 1         |
| Slc25a25_j3   | 3.75797   | 2.73463         | 0          | 1         | 1         |
| Slc25a25      | 12.0884   | 9.89607         | 0          | 1         | 1         |
| Fpgs          | 3.34573   | 5.73244         | 0.776827   | 1.62E-08  | 1.09E-06  |
| Fpgs_j1       | 0.854413  | 0.133193        | -2.68142   | 1.51E-05  | 0.0004408 |
| Cdk9_j3       | 1.15485   | 0 -1.79769e+308 |            | 2.30E-11  | 2.61E-09  |
| Cdk9_j4       | 20.2821   | 24.1382         | 0.25111    | 0.0226819 | 0.153721  |
| Ttc16_j2      | 0.0885616 | 0.101128        | 0.191424   | 0.816368  | 1         |
| Stxbp1        | 276.496   | 243.364         | -0.18414   | 0.0443996 | 0.240368  |
| Garnl3_j7     | 0.575682  | 0.822818        | 0          | 1         | 1         |
| Garnl3_j8     | 1.41388   | 0.662591        | 0          | 1         | 1         |
| Ralgps1       | 3.22085   | 3.40417         | 0          | 1         | 1         |
| Zbtb34_j1     | 0.946232  | 0.780727        | -0.277376  | 0.169693  | 0.506699  |
| Zbtb43_j2     | 0.063022  | 0.0217818       | 0          | 1         | 1         |
| Zbtb43        | 0.460228  | 0.643747        | 0          | 1         | 1         |
| Zbtb43_j3     | 0.105711  | 0.0784781       | 0          | 1         | 1         |
| Zbtb43        | 0.602806  | 0.915537        | 0          | 1         | 1         |
| Lmx1b_j1      | 0.0478638 | 0.0303947       | -0.655116  | 0.738282  | 1         |
| Fam125b_j2    | 0.140775  | 0               | 0          | 1         | 1         |
| Fam125b       | 11.3132   | 10.3768         | 0          | 1         | 1         |
| Pbx3_j5       | 1.97832   | 1.47782         | 0          | 1         | 1         |
| Pbx3          | 3.39431   | 2.41929         | 0          | 1         | 1         |
| Gapvd1_j4     | 7.82639   | 7.88669         | 0          | 1         | 1         |
| Gapvd1_j5     | 1.62049   | 2.25436         | 0          | 1         | 1         |
| Gapvd1_j9     | 0.369293  | 0.189275        | 0          | 1         | 1         |
| Fbxw2         | 8.4973    | 5.88516         | 0          | 1         | 1         |
| Fbxw2_j3      | 3.3002    | 2.36665         | 0          | 1         | 1         |
| Psm5          | 1.57005   | 1.34376         | -0.224543  | 0.234541  | 0.581922  |
| Traf1         | 0.327806  | 0.568291        | 0.793789   | 0.0596164 | 0.287307  |
| Traf1_j1      | 0.0702061 | 0 -1.79769e+308 |            | 0.0188609 | 1         |
| Traf1_j5      | 0.144076  | 0.0161895       | -3.15371   | 0.160789  | 0.495357  |
| Rab14_j3      | 42.7916   | 42.5977         | 0          | 1         | 1         |
| Rab14         | 8.94831   | 0.00084054      | 0          | 1         | 1         |
| Stom          | 6.75181   | 5.82216         | 0          | 1         | 1         |
| Ggta1_j7      | 0.7832    | 0.753879        | 0          | 1         | 1         |
| Ggta1         | 1.03576   | 0.791704        | 0          | 1         | 1         |
| Ttll11_j1     | 2.66758   | 2.89301         | 0          | 1         | 1         |
| Ttll11        | 1.21002   | 0.985942        | 0          | 1         | 1         |
| Ndufa8_j1     | 6.66805   | 5.11963         | 0          | 1         | 1         |
| Ndufa8        | 39.2767   | 39.6379         | 0          | 1         | 1         |
| Rbm18_j2      | 0         | 0.761955        | 0          | 1         | 1         |
| Rbm18         | 10.5963   | 10.6005         | 0          | 1         | 1         |
| Gm13436       | 81.6098   | 100.105         | 0.2947     | 0.0023544 | 0.0284256 |
| Pdcl          | 5.50973   | 5.00315         | 0          | 1         | 1         |

|             |           |                 |             |           |           |
|-------------|-----------|-----------------|-------------|-----------|-----------|
| Rc3h2       | 1.81892   | 1.2925          | -0.492926   | 0.0021254 | 0.0262016 |
| Rc3h2_j5    | 0.102996  | 0.144822        | 0.491694    | 0.319386  | 1         |
| Zbtb6_j2    | 0.289593  | 0.564409        | 0           | 1         | 1         |
| Zbtb6_j3    | 1.00062   | 0.738088        | 0           | 1         | 1         |
| Zbtb26      | 1.03981   | 0.9654          | 0           | 1         | 1         |
| Strbp_j1    | 2.53415   | 0.932189        | 0           | 1         | 1         |
| Strbp       | 14.791    | 11.8787         | 0           | 1         | 1         |
| Dennd1a_j7  | 2.98002   | 3.89367         | 0           | 1         | 1         |
| Dennd1a_j2  | 2.22828   | 2.39723         | 0           | 1         | 1         |
| Psmb7_j1    | 30.4585   | 33.0106         | 0.116086    | 0.190798  | 0.533079  |
| Nr6a1_j2    | 1.04702   | 1.22839         | 0.23048     | 0.274334  | 0.62342   |
| Nr6a1_j5    | 0.227453  | 0.236182        | 0.0543326   | 0.893161  | 0.966313  |
| Golga1      | 0.42874   | 0.643662        | 0.586201    | 0.0042869 | 0.0451964 |
| Golga1_j4   | 0.160426  | 0.214305        | 0.417759    | 0.317737  | 0.661018  |
| Scai_j4     | 0.733915  | 1.07943         | 0           | 1         | 1         |
| Scai        | 0.600764  | 0.333232        | 0           | 1         | 1         |
| Ppp6c_j1    | 8.4123    | 8.30748         | 0           | 1         | 1         |
| Ppp6c       | 9.46176   | 9.63276         | 0           | 1         | 1         |
| Lrp1b_j4    | 0.0677042 | 0 -1.79769e+308 |             | 0.0007744 | 1         |
| Lrp1b_j3    | 0.187238  | 0.185978        | -0.00973737 | 0.982101  | 0.994587  |
| Gm13461     | 95.5858   | 108.758         | 0.186247    | 0.0445902 | 0.241024  |
| Lrp1b       | 0.282512  | 0.253063        | -0.158817   | 0.686289  | 0.883078  |
| Gtdc1_j3    | 4.57718   | 5.20872         | 0.186472    | 0.196114  | 0.538877  |
| Zeb2_j2     | 1.14608   | 1.3167          | 0           | 1         | 1         |
| Zeb2        | 0.150994  | 0.163955        | 0           | 1         | 1         |
| Zeb2_j3     | 0.466236  | 0.239001        | 0           | 1         | 1         |
| MuORC4      | 1.06973   | 0.616071        | 0           | 1         | 1         |
| Mmadhc      | 25.6903   | 23.9392         | 0           | 1         | 1         |
| Rnd3        | 3.46621   | 3.06313         | 0           | 1         | 1         |
| Rbm43       | 1.90946   | 1.82817         | 0           | 1         | 1         |
| Neb_j12     | 0.0836746 | 0.00667106      | -3.6488     | 1         | 1         |
| Neb_j14     | 0.0875179 | 0.0638912       | -0.45396    | 0.566068  | 1         |
| Arl5a_j1    | 0.364101  | 0.313405        | 0           | 1         | 1         |
| Arl5a       | 6.6436    | 5.69269         | 0           | 1         | 1         |
| Cacnb4_j4   | 0.28373   | 0.0449257       | 0           | 1         | 1         |
| Cacnb4_j3   | 6.61053   | 4.82365         | 0           | 1         | 1         |
| Stam2_j1    | 0.462912  | 0.000110966     | -12.0264    | 0.827888  | 0.944579  |
| Stam2       | 1.26935   | 1.04546         | -0.279945   | 0.209663  | 0.55399   |
| XLOC_018884 | 0.125757  | 0.057778        | -1.12205    | 0.423294  | 1         |
| Prpf40a_j9  | 0.423912  | 0.209989        | 0           | 1         | 1         |
| Prpf40a_j8  | 2.16112   | 2.33356         | 0           | 1         | 1         |
| Prpf40a_j7  | 0.626432  | 0.883269        | 0           | 1         | 1         |
| Nr4a2_j5    | 0.074428  | 0.152014        | 1.03028     | 0.197287  | 1         |
| Nr4a2       | 0.285142  | 0.187421        | -0.605395   | 0.260491  | 0.609208  |
| Cytip       | 0.0842636 | 0.1205          | 0.516054    | 0.564434  | 1         |
| Acvr1       | 2.34983   | 2.22602         | 0           | 1         | 1         |
| Acvr1       | 3.6425    | 4.44753         | 0           | 1         | 1         |

|             |           |                 |            |           |           |
|-------------|-----------|-----------------|------------|-----------|-----------|
| Ccdc148_j3  | 0.482957  | 0.123178        | -1.97115   | 0.00079   | 0.0118667 |
| Ccdc148_j2  | 0.445219  | 0.420088        | -0.0838247 | 0.808273  | 0.936972  |
| Wdsub1_j7   | 0.134391  | 0.716902        | 0          | 1         | 1         |
| Wdsub1_j9   | 0.508168  | 0.370347        | 0          | 1         | 1         |
| Baz2b_j1    | 1.18992   | 1.16553         | -0.029881  | 0.915993  | 0.973828  |
| Baz2b_j11   | 0.469603  | 0.371916        | -0.336466  | 0.252254  | 0.600258  |
| Baz2b_j14   | 0.179327  | 0.0267439       | -2.74531   | 0.0011489 | 0.0159772 |
| Baz2b_j13   | 0.543317  | 0.000118216     | -12.1662   | 0.573784  | 0.827772  |
| Cd302       | 0.708255  | 0.873213        | 0          | 1         | 1         |
| Ly75_j3     | 0.249534  | 0 -1.79769e+308 |            | 7.69E-07  | 3.31E-05  |
| Ly75_j6     | 0.0469594 | 0 -1.79769e+308 |            | 0.0269234 | 1         |
| Ly75_j7     | 0.257041  | 0.321892        | 0.32458    | 0.483425  | 0.77601   |
| Pla2r1      | 0.289817  | 0.293992        | 0.0206367  | 0.941359  | 0.982153  |
| Pla2r1_j2   | 0.0688787 | 0 -1.79769e+308 |            | 3.73E-05  | 1         |
| Itgb6       | 0.235687  | 0.103845        | -1.18244   | 0.0346744 | 0.204533  |
| Rbms1       | 4.85581   | 4.3519          | 0          | 1         | 1         |
| Fap_j1      | 0.149832  | 0.128466        | -0.221954  | 0.848375  | 0.952095  |
| Fap_j2      | 0.239973  | 0.102933        | -1.22117   | 0.238894  | 0.586097  |
| Fap_j3      | 0.0892128 | 0 -1.79769e+308 |            | 0.0063896 | 1         |
| Fap         | 0.0474605 | 0.0533359       | 0.16838    | 0.894495  | 1         |
| Ifih1       | 0.629143  | 0.607125        | -0.0513953 | 0.806933  | 0.936272  |
| Kcnh7_j1    | 2.88318   | 1.91216         | 0          | 1         | 1         |
| erg3        | 0.368615  | 0.081999        | -2.16844   | 0.152493  | 0.484211  |
| Grb14_j1    | 11.7409   | 11.2877         | -0.0567901 | 0.681188  | 0.880213  |
| Grb14       | 9.03236   | 7.25936         | -0.315261  | 0.01544   | 0.117321  |
| Cobll1_j5   | 0.279326  | 0.203138        | 0          | 1         | 1         |
| Cobll1_j7   | 0.541025  | 0.000336368     | 0          | 1         | 1         |
| Cobll1_j6   | 0.590113  | 0.617945        | 0          | 1         | 1         |
| Slc38a11_j3 | 0.784706  | 0.144414        | -2.44194   | 1.05E-06  | 4.32E-05  |
| Slc38a11    | 0.230578  | 0.0692154       | -1.73609   | 0.0116984 | 0.0962435 |
| Scn3a_j3    | 0.118861  | 0.250442        | 1.0752     | 0.0162712 | 0.121888  |
| Scn3a_j5    | 0.0847383 | 0 -1.79769e+308 |            | 4.48E-05  | 1         |
| Scn3a_j4    | 0.169155  | 0 -1.79769e+308 |            | 5.56E-09  | 4.09E-07  |
| Galnt3      | 0.935255  | 0.773764        | -0.273467  | 0.309133  | 0.653865  |
| Ttc21b      | 2.51528   | 1.88344         | -0.417347  | 0.0094874 | 0.0823742 |
| Scn1a_j2    | 6.98569   | 4.55001         | 0          | 1         | 1         |
| Scn9a_j5    | 6.67133   | 7.59016         | 0          | 1         | 1         |
| Scn7a       | 6.75397   | 5.32876         | 0          | 1         | 1         |
| Stk39       | 38.2212   | 24.6423         | 0          | 1         | 1         |
| Spc25       | 0.293572  | 0.378216        | 0.3655     | 0.452698  | 0.757746  |
| Fastkd1     | 3.21505   | 3.13976         | 0          | 1         | 1         |
| Tlk1        | 10.4992   | 9.63407         | 0          | 1         | 1         |
| Mettl8      | 0.846892  | 0.867316        | 0          | 1         | 1         |
| Mettl8_j5   | 2.09331   | 1.69171         | 0          | 1         | 1         |
| Slc25a12    | 23.2942   | 21.3012         | -0.129038  | 0.136926  | 0.460113  |
| Sp3         | 0.677488  | 0.693351        | 0.0333889  | 0.86666   | 0.957738  |
| Sp3_j1      | 0.214121  | 0.207373        | -0.0461987 | 0.895808  | 0.96693   |

|            |           |                 |            |           |           |
|------------|-----------|-----------------|------------|-----------|-----------|
| Ola1       | 28.7887   | 27.1333         | -0.0854366 | 0.389054  | 0.716324  |
| Cir1_j2    | 0.133811  | 0.0698382       | -0.938105  | 0.384348  | 1         |
| Cir1_j3    | 0.109634  | 0.0587733       | -0.899461  | 0.452002  | 1         |
| Gpr155_j4  | 1.78813   | 2.32465         | 0          | 1         | 1         |
| Gpr155     | 4.37684   | 4.64799         | 0          | 1         | 1         |
| Wipf1      | 1.81266   | 1.94882         | 0          | 1         | 1         |
| Chrna1_j1  | 0.0867394 | 2.15E-05        | -11.981    | 0.973159  | 1         |
| Chn1       | 11.3882   | 6.50597         | 0          | 1         | 1         |
| Chn1       | 10.116    | 11.1826         | 0          | 1         | 1         |
| Atf2_j2    | 2.28386   | 2.23531         | 0          | 1         | 1         |
| Atf2       | 1.53337   | 2.06352         | 0          | 1         | 1         |
| Atp5g3_j1  | 349.96    | 370.042         | 0.0804985  | 0.353597  | 0.68999   |
| Lnp        | 4.23586   | 3.70387         | 0          | 1         | 1         |
| Lnp        | 10.5314   | 8.94435         | 0          | 1         | 1         |
| Mrpl23-ps1 | 25.7557   | 31.5885         | 0.294506   | 0.0257225 | 0.167616  |
| Gm13654    | 253.271   | 292.016         | 0.205366   | 0.0165845 | 0.123589  |
| Nfe2l2_j4  | 10.5147   | 0.00609283      | -10.753    | 0.0010547 | 0.0148929 |
| Nfe2l2     | 1.4828    | 1.32208         | -0.165512  | 0.382022  | 0.712175  |
| Ttc30b     | 2.857     | 2.3669          | -0.271501  | 0.092207  | 0.373682  |
| Pde11a     | 2.7979    | 1.87045         | 0          | 1         | 1         |
| Pde11a_j2  | 1.2146    | 1.12272         | 0          | 1         | 1         |
| Prkra      | 5.75486   | 5.38464         | 0          | 1         | 1         |
| Fkbp7      | 2.32123   | 1.87244         | -0.309974  | 0.284239  | 0.632886  |
| Fkbp7_j1   | 0.677622  | 0.893185        | 0.398478   | 0.402867  | 0.726036  |
| Fkbp7_j4   | 0.44199   | 0.082054        | -2.42937   | 0.195256  | 0.537581  |
| Ccdc141_j1 | 5.34603   | 2.90563         | 0          | 1         | 1         |
| Ccdc141_j2 | 0.226042  | 0.115081        | 0          | 1         | 1         |
| Ccdc141    | 3.55702   | 1.39602         | 0          | 1         | 1         |
| Sestd1_j1  | 0.188136  | 0               | 0          | 1         | 1         |
| Sestd1_j5  | 0.176486  | 0.121068        | 0          | 1         | 1         |
| Zfp385b    | 7.6318    | 6.88583         | 0          | 1         | 1         |
| Zfp385b    | 3.35623   | 2.24374         | 0          | 1         | 1         |
| Cwc22_j4   | 0.152739  | 0.0275567       | -2.4706    | 0.310792  | 0.655474  |
| Cwc22_j10  | 0.0940123 | 0 -1.79769e+308 |            | 0.124627  | 1         |
| Cerkl_j3   | 0.154264  | 0.119522        | -0.368135  | 0.44046   | 0.749669  |
| Neurod1    | 0.301572  | 0.297899        | -0.0176815 | 0.964957  | 0.990054  |
| Pde1a_j3   | 0.203873  | 0.034945        | 0          | 1         | 1         |
| Pde1a      | 0.213724  | 0.755681        | 0          | 1         | 1         |
| Pde1a_j4   | 0.610298  | 0.830009        | 0          | 1         | 1         |
| Frzb       | 3.80824   | 2.59918         | -0.551066  | 0.002486  | 0.029709  |
| Nckap1_j2  | 0.132118  | 0               | 0          | 1         | 1         |
| Nckap1_j3  | 0.0841307 | 0.00868016      | 0          | 1         | 1         |
| Nckap1     | 3.52918   | 3.17172         | 0          | 1         | 1         |
| Gm13680    | 72.7429   | 84.7124         | 0.219767   | 0.0195968 | 0.139035  |
| Calcr1_j1  | 0.608359  | 0.599392        | 0          | 1         | 1         |
| Calcr1     | 1.31799   | 0.780491        | 0          | 1         | 1         |
| Tfpi_j4    | 0.0680827 | 0 -1.79769e+308 |            | 0.0570862 | 1         |

|               |           |            |            |           |           |
|---------------|-----------|------------|------------|-----------|-----------|
| Tfpi_j3       | 0.382914  | 0.653453   | 0.771062   | 0.121471  | 0.433987  |
| Tfpi          | 0.104714  | 0.0726737  | -0.526953  | 0.693789  | 1         |
| Ctnnd1_j1     | 3.73311   | 3.97779    | 0.0915887  | 0.520316  | 0.797861  |
| XLOC_018972   | 1.69959   | 1.61031    | -0.0778496 | 0.526179  | 0.800979  |
| Ctnnd1        | 0.0664743 | 0.0478954  | -0.472909  | 0.382189  | 1         |
| Tmx2_j5       | 0.999901  | 2.21569    | 0          | 1         | 1         |
| Zdhhc5        | 9.48479   | 7.66822    | 0          | 1         | 1         |
| Clp1          | 3.02513   | 3.25165    | 0.104176   | 0.559866  | 0.820916  |
| XLOC_018976   | 0.252588  | 0.349732   | 0.469462   | 0.405156  | 0.726989  |
| Serping1_j3   | 17.5722   | 23.607     | 0          | 1         | 1         |
| Serping1      | 17.2331   | 13.7736    | 0          | 1         | 1         |
| Rtn4rl2       | 9.14443   | 5.49037    | 0          | 1         | 1         |
| P2rx3_j8      | 4.80594   | 15.8782    | 0          | 1         | 1         |
| P2rx3_j9      | 0.953263  | 0.864541   | 0          | 1         | 1         |
| P2rx3         | 7.52368   | 7.82141    | 0          | 1         | 1         |
| Ndufs3        | 0.302288  | 1.0399     | 1.78245    | 0.0054984 | 0.0545575 |
| Ptpmt1        | 1.88409   | 1.79367    | -0.0709596 | 0.660021  | 0.871013  |
| AK020549_j1   | 0.165413  | 0.148695   | 0          | 1         | 1         |
| Slc39a13      | 8.00752   | 6.86681    | 0          | 1         | 1         |
| Madd_j1       | 1.2465    | 1.30067    | 0          | 1         | 1         |
| Madd_j2       | 7.80194   | 8.39142    | 0          | 1         | 1         |
| 1110051M20Rik | 11.2208   | 13.5431    | 0.271382   | 0.0214732 | 0.147938  |
| 1110051M20Rik | 51.2846   | 46.0681    | -0.154755  | 0.100508  | 0.392473  |
| F2_j1         | 0.0887176 | 0.0483497  | -0.875714  | 0.605105  | 1         |
| Zfp408_j3     | 0.555288  | 0.3959     | 0          | 1         | 1         |
| Zfp408_j1     | 0.334422  | 0.269307   | 0          | 1         | 1         |
| Zfp408        | 0.373331  | 0.620113   | 0          | 1         | 1         |
| Atg13         | 1.71382   | 1.38472    | 0          | 1         | 1         |
| Dgkz_j2       | 7.11563   | 6.91326    | 0          | 1         | 1         |
| Dgkz_j6       | 8.03074   | 6.21639    | 0          | 1         | 1         |
| Dgkz_j10      | 48.4591   | 36.5615    | 0          | 1         | 1         |
| Creb3l1_j1    | 4.12039   | 3.10725    | -0.407143  | 0.135284  | 0.457605  |
| Creb3l1       | 3.00828   | 2.8283     | -0.0890053 | 0.606683  | 0.845067  |
| Gylt1b_j1     | 0.0610488 | 0.100091   | 0.713275   | 0.550769  | 1         |
| Mapk8ip1_j2   | 82.3476   | 74.2352    | 0          | 1         | 1         |
| Mapk8ip1_j5   | 18.4504   | 9.48151    | 0          | 1         | 1         |
| Cry2          | 5.62181   | 5.17009    | 0          | 1         | 1         |
| Slc35c1       | 3.35834   | 3.66174    | 0          | 1         | 1         |
| Slc35c1       | 0.685418  | 0.619872   | 0          | 1         | 1         |
| Prdm11_j4     | 0.180991  | 0.23908    | 0.401579   | 0.539459  | 0.808383  |
| Tspan18       | 5.04739   | 4.85147    | 0          | 1         | 1         |
| Cd82_j2       | 20.3096   | 18.0224    | 0          | 1         | 1         |
| Cd82          | 15.2537   | 16.1819    | 0          | 1         | 1         |
| Ext2_j4       | 11.2023   | 15.2463    | 0          | 1         | 1         |
| Ext2          | 2.92736   | 3.24621    | 0          | 1         | 1         |
| Accs_j1       | 0.147511  | 0.00107826 | 0          | 1         | 1         |
| Accs_j8       | 0.150013  | 0.245431   | 0          | 1         | 1         |



|                  |           |                 |              |           |           |
|------------------|-----------|-----------------|--------------|-----------|-----------|
| Accsl_j6         | 0.0772566 | 0.0178268       | -2.11561     | 0.29765   | 1         |
| Alkbh3_j5        | 0.958629  | 0.614324        | -0.641974    | 0.221449  | 0.568621  |
| Alkbh3_j4        | 8.47359   | 6.24726         | -0.43975     | 0.013327  | 0.105888  |
| Hsd17b12         | 38.9932   | 33.8454         | -0.204265    | 0.0346887 | 0.204568  |
| AK140370         | 0.536051  | 0.369179        | -0.53805     | 0.234318  | 0.581678  |
| Ttc17_j2         | 1.22959   | 1.0701          | 0            | 1         | 1         |
| B230118H07Rik    | 24.4712   | 21.3194         | -0.198918    | 0.106654  | 0.405742  |
| Ldlrad3_j2       | 0.520618  | 0.542762        | 0.0600942    | 0.865536  | 0.957106  |
| Ldlrad3          | 2.21186   | 2.47466         | 0.161973     | 0.328071  | 0.670635  |
| Ldlrad3          | 0.195719  | 0.0629255       | -1.63706     | 0.0635115 | 0.298841  |
| Trim44           | 0.522779  | 0.0562027       | 0            | 1         | 1         |
| Fjx1             | 2.87545   | 2.78303         | -0.0471273   | 0.773646  | 0.923158  |
| Cd44_j2          | 16.8951   | 5.59645         | 0            | 1         | 1         |
| Cd44             | 2.29187   | 2.33077         | 0            | 1         | 1         |
| Pdhx             | 13.1235   | 12.583          | -0.0606726   | 0.573634  | 0.827718  |
| Ehf              | 0.400802  | 0.297113        | -0.431879    | 0.154028  | 0.486968  |
| Cat_j2           | 13.4783   | 9.50789         | 0            | 1         | 1         |
| Cat              | 46.7662   | 43.5018         | 0            | 1         | 1         |
| Nat10_j1         | 1.9627    | 2.65721         | 0            | 1         | 1         |
| Nat10            | 1.00017   | 0.958294        | 0            | 1         | 1         |
| Nat10_j5         | 1.85159   | 1.72382         | 0            | 1         | 1         |
| Caprin1          | 2.63178   | 0.317513        | 0            | 1         | 1         |
| Caprin1          | 10.7383   | 10.9054         | 0            | 1         | 1         |
| D430041D05Rik_j3 | 1.11507   | 0.206753        | -2.43116     | 1.07E-11  | 1.30E-09  |
| D430041D05Rik_j4 | 0.0568518 | 0 -1.79769e+308 |              | 0.0005156 | 1         |
| D430041D05Rik_j5 | 0.204352  | 0.150548        | -0.440832    | 0.1634    | 0.498674  |
| Hipk3_j1         | 10.7195   | 11.1527         | 0            | 1         | 1         |
| Hipk3            | 5.18361   | 4.46476         | 0            | 1         | 1         |
| Tcp11l1_j1       | 2.08123   | 1.84812         | 0            | 1         | 1         |
| Depdc7           | 2.55684   | 2.17295         | -0.234708    | 0.248319  | 0.595624  |
| Qser1            | 1.98106   | 1.97986         | -0.000875115 | 0.994687  | 0.998469  |
| Eif3m_j2         | 0.164006  | 4.86E-05        | -11.7203     | 0.900655  | 0.968396  |
| Rcn1             | 8.56342   | 8.19965         | -0.062624    | 0.574392  | 0.828005  |
| Elp4             | 0.118052  | 0.088815        | -0.410551    | 0.479935  | 1         |
| Elp4_j3          | 3.86741   | 3.66946         | -0.0757995   | 0.726852  | 0.90322   |
| Dnajc24          | 0.768795  | 0.719531        | -0.095541    | 0.534308  | 0.805503  |
| AK084494_j6      | 0.30268   | 0.0338523       | -3.16047     | 0.2067    | 0.551333  |
| 2700007P21Rik_j4 | 2.25612   | 2.23537         | 0            | 1         | 1         |
| 2700007P21Rik_j3 | 4.84993   | 3.88066         | 0            | 1         | 1         |
| Mett5d1          | 0.284157  | 0.311104        | 0.13071      | 0.836506  | 0.947639  |
| Mett5d1_j2       | 1.24178   | 0.703164        | -0.820472    | 0.0191515 | 0.136838  |
| Mett5d1_j1       | 0.642597  | 0.33499         | -0.939797    | 0.072601  | 0.32418   |
| Fibin            | 1.59571   | 1.07964         | -0.56365     | 0.0091492 | 0.0802284 |
| Ano3             | 12.4004   | 9.54499         | 0            | 1         | 1         |
| Ano3_j1          | 14.909    | 9.25268         | 0            | 1         | 1         |
| Tmem85_j2        | 0.174331  | 0.168643        | 0            | 1         | 1         |
| Tmem85           | 0.342314  | 0.302149        | 0            | 1         | 1         |

|                  |           |                 |            |           |           |
|------------------|-----------|-----------------|------------|-----------|-----------|
| Ryr3_j4          | 0.773466  | 0.910253        | 0.234929   | 0.350284  | 0.687781  |
| Ryr3_j13         | 0.094408  | 0 -1.79769e+308 |            | 0.0390322 | 1         |
| Ryr3_j17         | 0.247097  | 0.11811         | -1.06495   | 0.104304  | 0.400632  |
| Ryr3_j21         | 0.124128  | 0.200138        | 0.68917    | 0.383943  | 0.71322   |
| Ryr3_j24         | 0.204236  | 0.0637261       | -1.68028   | 0.182551  | 0.522997  |
| Scg5             | 1.51371   | 1.45137         | 0          | 1         | 1         |
| Arhgap11a_j1     | 0.0653568 | 0 -1.79769e+308 |            | 0.0017702 | 1         |
| Arhgap11a        | 0.414746  | 0.637646        | 0.620527   | 0.0154884 | 0.117492  |
| Gjd2             | 1.21438   | 0.495107        | -1.29441   | 3.71E-07  | 1.71E-05  |
| Aqr              | 7.48649   | 7.28059         | -0.0402333 | 0.700148  | 0.8896    |
| Zfp770           | 4.05477   | 3.71525         | -0.12616   | 0.326004  | 0.669299  |
| Atpbd4           | 3.31218   | 3.73826         | 0          | 1         | 1         |
| Atpbd4           | 5.40633   | 4.62697         | 0          | 1         | 1         |
| Meis2            | 2.43073   | 1.12203         | 0          | 1         | 1         |
| Rasgrp1_j2       | 6.51365   | 5.69807         | 0          | 1         | 1         |
| Rasgrp1_j3       | 3.77954   | 2.21279         | 0          | 1         | 1         |
| Rasgrp1_j7       | 1.01217   | 1.84312         | 0          | 1         | 1         |
| Gpr176_j2        | 0.108804  | 0.169444        | 0          | 1         | 1         |
| Gpr176           | 0.979046  | 0.846061        | 0          | 1         | 1         |
| Srp14            | 53.9347   | 57.958          | 0          | 1         | 1         |
| Bmf              | 0.630954  | 0.494217        | -0.352388  | 0.209481  | 0.553795  |
| Bmf_j3           | 0.0974122 | 1.09E-05        | -13.1203   | 0.976462  | 1         |
| A430105I19Rik_j4 | 0.588294  | 0.727602        | 0          | 1         | 1         |
| A430105I19Rik    | 0.952328  | 0.909581        | 0          | 1         | 1         |
| Ccdc32_j1        | 6.25824   | 5.14836         | 0          | 1         | 1         |
| Ccdc32           | 10.8974   | 11.7498         | 0          | 1         | 1         |
| Fam82a2          | 6.09039   | 6.83221         | 0.165818   | 0.222696  | 0.569646  |
| Rhov             | 21.3218   | 27.8904         | 0.387441   | 0.000137  | 0.0027865 |
| Ino80            | 0.461732  | 0.436903        | 0          | 1         | 1         |
| Oip5             | 0.662859  | 0.376364        | -0.816572  | 0.0193614 | 0.137812  |
| Ndufaf1_j1       | 1.14332   | 1.05881         | 0          | 1         | 1         |
| Ndufaf1          | 1.76974   | 1.93756         | 0          | 1         | 1         |
| Rpap1_j1         | 2.10508   | 2.07189         | 0          | 1         | 1         |
| Rpap1            | 2.35119   | 1.82709         | 0          | 1         | 1         |
| Spnb5_j1         | 0.0805356 | 0.0281592       | -1.51602   | 0.0895493 | 1         |
| Spnb5_j2         | 0.0317396 | 0.0620852       | 0.967964   | 0.18467   | 1         |
| Spnb5_j1         | 0.245743  | 0.0484403       | -2.34287   | 0.0747655 | 0.329944  |
| Spnb5_j7         | 0.0770551 | 0.000280035     | -8.10414   | 0.755322  | 1         |
| Spnb5_j5         | 0.119402  | 0.0275312       | -2.11668   | 0.0909163 | 1         |
| Ehd4             | 13.6935   | 14.1302         | 0          | 1         | 1         |
| Pla2g4e_j3       | 0.188838  | 0.0485996       | -1.95814   | 0.0786364 | 0.340127  |
| Pla2g4e_j4       | 0.0487205 | 0 -1.79769e+308 |            | 0.0172759 | 1         |
| Vps39_j1         | 1.44452   | 1.42365         | 0          | 1         | 1         |
| Vps39            | 3.81279   | 2.99606         | 0          | 1         | 1         |
| Vps39            | 10.1804   | 9.11477         | 0          | 1         | 1         |
| Tmem87a          | 3.40825   | 3.5074          | 0          | 1         | 1         |
| Tmem87a_j3       | 3.46807   | 3.47993         | 0          | 1         | 1         |

|                  |           |                       |            |           |           |
|------------------|-----------|-----------------------|------------|-----------|-----------|
| Zfp106           | 4.77672   | 4.10652               | 0          | 1         | 1         |
| Zfp106_j1        | 8.12415   | 6.15962               | 0          | 1         | 1         |
| Lrrc57           | 0.321362  | 0.323639              | 0          | 1         | 1         |
| Lrrc57           | 9.16706   | 6.30467               | 0          | 1         | 1         |
| Cdan1            | 1.04625   | 1.05929               | 0          | 1         | 1         |
| Ttbk2            | 0.77294   | 0.78913               | 0          | 1         | 1         |
| Ubr1_j3          | 6.26985   | 5.69882               | 0          | 1         | 1         |
| Ubr1_j4          | 3.16207   | 2.4188                | 0          | 1         | 1         |
| Ubr1             | 1.92681   | 1.51816               | 0          | 1         | 1         |
| Tgm5_j4          | 0.0694581 | 0 -1.79769e+308       | 0.0117781  |           | 1         |
| Tgm5_j5          | 0.0975584 | 0.0245348             | -1.99144   | 0.160653  | 1         |
| Tgm5_j8          | 0.0680084 | 0.0600887             | -0.178618  | 0.885482  | 1         |
| Ppip5k1_j5       | 22.8195   | 25.2438               | 0          | 1         | 1         |
| Serinc4_j1       | 6.2187    | 7.12964               | 0.197215   | 0.168485  | 0.505081  |
| Mfap1a           | 3.07004   | 3.08367               | 0.00639108 | 0.965279  | 0.990054  |
| Frmd5_j3         | 0.2445    | 0.25708               | 0          | 1         | 1         |
| Frmd5_j2         | 0.2323    | 0.438619              | 0          | 1         | 1         |
| Spg11            | 0.0655981 | 0.0626199             | -0.0670319 | 0.888916  | 1         |
| Spg11_j6         | 0.263066  | 0.0778208             | -1.7572    | 0.0018353 | 0.0233382 |
| Patl2_j2         | 0.193232  | 0 -1.79769e+308       | 0.0027631  | 0.0322654 |           |
| Duoxa1_j6        | 0.055783  | 0 -1.79769e+308       | 0.0759768  |           | 1         |
| Shf_j2           | 14.1876   | 14.0665               | -0.0123686 | 0.920023  | 0.974931  |
| Shf_j1           | 3.47014   | 2.33895               | -0.569131  | 0.0265182 | 0.17117   |
| Bambi-ps1        | 0.835957  | 1.82955               | 1.12999    | 3.46E-06  | 0.0001228 |
| Gatm             | 36.7127   | 36.3379               | -0.0148037 | 0.870208  | 0.958714  |
| Slc30a4          | 3.26851   | 3.08898               | -0.0815022 | 0.546484  | 0.81297   |
| Myef2_j2         | 23.0168   | 23.925                | 0.0558301  | 0.581907  | 0.832581  |
| Cep152_j1        | 0.09792   | 0.270429              | 1.46557    | 0.0546221 | 0.272571  |
| Cep152_j8        | 0.159791  | 0.216319              | 0.436979   | 0.440171  | 0.749556  |
| Secisbp2l_j1     | 3.63858   | 3.42391               | 0          | 1         | 1         |
| Secisbp2l_j2     | 3.81198   | 3.84649               | 0          | 1         | 1         |
| Secisbp2l        | 5.06763   | 3.21844               | 0          | 1         | 1         |
| Cops2            | 22.2685   | 17.0972               | 0          | 1         | 1         |
| Cops2            | 19.2342   | 16.253                | 0          | 1         | 1         |
| Hdc_j1           | 0.247746  | 0.21457               | -0.207415  | 0.738722  | 0.908177  |
| Hdc              | 0.043616  | 0.362665              | 3.05571    | 0.0010376 | 0.0147108 |
| Gabpb1_j4        | 2.24105   | 2.11917               | 0          | 1         | 1         |
| Gabpb1           | 1.20674   | 0.818348              | 0          | 1         | 1         |
| Trpm7_j3         | 2.6573    | 2.72227               | 0          | 1         | 1         |
| Trpm7            | 1.83788   | 1.38871               | 0          | 1         | 1         |
| Trpm7_j5         | 0.205302  | 0.0651341             | 0          | 1         | 1         |
| 2010106G01Rik_j5 | 0         | 0.149465              | 0          | 1         | 1         |
| 2010106G01Rik    | 3.94123   | 2.87963               | 0          | 1         | 1         |
| Ncaph            | 0         | 0.136139 1.79769e+308 | 0.0048884  |           | 1         |
| Itpril1          | 1.89672   | 2.25571               | 0.250077   | 0.15699   | 0.490805  |
| 1810024B03Rik    | 0.763912  | 0.815217              | 0.0937787  | 0.846322  | 0.951433  |
| Ciao1_j2         | 6.42575   | 6.20383               | 0          | 1         | 1         |

|                  |           |                 |           |           |           |
|------------------|-----------|-----------------|-----------|-----------|-----------|
| Fahd2a           | 6.8367    | 5.89393         | -0.21407  | 0.170746  | 0.507662  |
| Kcni3_j6         | 10.5914   | 8.6773          | 0         | 1         | 1         |
| Kcni3            | 10.9812   | 7.67292         | 0         | 1         | 1         |
| Zfp661_j4        | 0.207847  | 0.172355        | -0.270137 | 0.648163  | 0.864472  |
| Zfp661_j5        | 0.22577   | 0.0522731       | -2.11072  | 0.012189  | 0.0993569 |
| Zfp661_j6        | 0.0701351 | 0.0344314       | -1.02641  | 0.41395   | 1         |
| Mal              | 25.2443   | 29.395          | 0.219616  | 0.0188857 | 0.135535  |
| Mall             | 0.261828  | 0.338063        | 0.368672  | 0.378704  | 0.710354  |
| Nphp1            | 1.03793   | 0.937806        | 0         | 1         | 1         |
| Nphp1_j1         | 0.26906   | 0.539469        | 0         | 1         | 1         |
| Nphp1            | 0.608094  | 0.776029        | 0         | 1         | 1         |
| 1500011K16Rik    | 23.4495   | 21.7687         | -0.107302 | 0.383854  | 0.71322   |
| Gm14012_j2       | 0.137985  | 0 -1.79769e+308 |           | 0.0071646 | 0.0670356 |
| Gm14005          | 0.24189   | 0.190374        | -0.34552  | 0.644123  | 0.862786  |
| Gm14005_j4       | 0.361835  | 0.0371098       | -3.28546  | 0.0962375 | 0.38304   |
| Gm14005          | 0.914762  | 0.751441        | -0.283736 | 0.474503  | 0.770688  |
| Anapc1_j2        | 0.0687415 | 0 -1.79769e+308 |           | 0.0008455 | 1         |
| Zc3h8_j3         | 0.512053  | 0.155712        | -1.71741  | 0.03866   | 0.219025  |
| Zc3h8_j1         | 1.93425   | 1.69286         | -0.192315 | 0.430744  | 0.743283  |
| Gm14025_j1       | 0.630602  | 0.227028        | -1.47386  | 1.04E-05  | 0.0003198 |
| Al847159_j2      | 0.191773  | 0.12695         | -0.595135 | 0.42744   | 0.741759  |
| Al847159_j1      | 0.133534  | 0.105019        | -0.346559 | 0.696903  | 1         |
| Il1b             | 0.239751  | 0.613382        | 1.35525   | 0.0009389 | 0.0135959 |
| Gm14045          | 5.28502   | 5.40087         | 0.0312807 | 0.873632  | 0.959888  |
| Snrpb            | 39.1323   | 42.7308         | 0.126915  | 0.192037  | 0.534179  |
| Idh3b_j5         | 0.150346  | 0.087644        | -0.778555 | 0.470996  | 0.768613  |
| Ubox5            | 2.04154   | 2.23393         | 0         | 1         | 1         |
| Ubox5_j2         | 1.32419   | 1.35373         | 0         | 1         | 1         |
| Prosap1_j2       | 0.0511409 | 0               | 0         | 1         | 1         |
| Ddrk1_j2         | 7.34004   | 10.1431         | 0.466644  | 0.0059153 | 0.0578696 |
| Ddrk1            | 9.21133   | 9.36331         | 0.0236091 | 0.849916  | 0.952228  |
| Slc4a11_j6       | 0.316717  | 0.622843        | 0         | 1         | 1         |
| Slc4a11_j7       | 0.813317  | 0.263833        | 0         | 1         | 1         |
| 4930402H24Rik_j2 | 1.17016   | 1.66349         | 0         | 1         | 1         |
| 4930402H24Rik    | 2.70903   | 2.85259         | 0         | 1         | 1         |
| Gfra4_j2         | 0.702173  | 0.831489        | 0.24387   | 0.633817  | 0.857971  |
| Gfra4_j3         | 1.04962   | 1.13703         | 0.115394  | 0.779302  | 0.925607  |
| Gfra4            | 2.98803   | 2.2834          | -0.388012 | 0.135613  | 0.458263  |
| Adam33_j1        | 0.140043  | 0 -1.79769e+308 |           | 0.0388795 | 0.219888  |
| Adam33_j2        | 0.091229  | 0 -1.79769e+308 |           | 0.0245265 | 1         |
| Adam33_j3        | 0.182195  | 0.145924        | -0.32026  | 0.643316  | 0.862314  |
| 1700037H04Rik    | 10.1701   | 11.8934         | 0         | 1         | 1         |
| Spf1             | 3.28168   | 3.61628         | 0         | 1         | 1         |
| Rnf24            | 2.8799    | 3.14152         | 0.125442  | 0.338782  | 0.679008  |
| Adra1d           | 1.15053   | 0.813623        | -0.499869 | 0.0088858 | 0.0784132 |
| Rassf2_j4        | 0.61669   | 1.01707         | 0         | 1         | 1         |
| Rassf2_j3        | 0.564049  | 1.3145          | 0         | 1         | 1         |

|                  |           |                 |            |           |           |
|------------------|-----------|-----------------|------------|-----------|-----------|
| Rassf2           | 0.514277  | 0.419588        | 0          | 1         | 1         |
| Slc23a2          | 4.8496    | 4.41168         | 0          | 1         | 1         |
| 5730494N06Rik_j4 | 1.88441   | 1.56871         | 0          | 1         | 1         |
| 5730494N06Rik_j3 | 1.68979   | 1.70055         | 0          | 1         | 1         |
| Pcna_j7          | 0.157639  | 0 -1.79769e+308 | 0.0320865  | 0.194253  |           |
| Prokr2           | 0.069116  | 0.189929        | 0          | 1         | 1         |
| Prokr2           | 1.36874   | 1.67972         | 0          | 1         | 1         |
| Gpcpd1_j3        | 9.69981   | 8.90345         | 0          | 1         | 1         |
| Gpcpd1_j4        | 5.72624   | 4.41454         | 0          | 1         | 1         |
| Gpcpd1           | 3.74594   | 3.13914         | 0          | 1         | 1         |
| Trmt6            | 1.48273   | 1.38863         | 0          | 1         | 1         |
| Hao1_j1          | 0.177811  | 0.845451        | 2.24938    | 7.13E-13  | 1.04E-10  |
| Tmx4             | 4.90596   | 3.90069         | -0.330808  | 0.0057547 | 0.0566506 |
| Gm14038          | 4.58776   | 4.22209         | -0.119834  | 0.471582  | 0.769092  |
| Pak7_j5          | 0.0797174 | 6.54E-06        | -13.5738   | 0.986053  | 1         |
| Pak7             | 0.219342  | 0.149391        | -0.554087  | 0.252717  | 0.600773  |
| Mkks             | 0         | 0.243356        | 0          | 1         | 1         |
| Mkks_j4          | 0.251648  | 0.415458        | 0          | 1         | 1         |
| Jag1_j3          | 1.78196   | 1.95061         | 0          | 1         | 1         |
| Jag1             | 1.24761   | 0.621802        | 0          | 1         | 1         |
| Gm14066_j6       | 0.263123  | 0 -1.79769e+308 | 0.0025964  | 0.0307386 |           |
| Gm14066_j7       | 0.229549  | 0.119515        | -0.941619  | 0.353761  | 0.690034  |
| Gm14066_j8       | 0.227563  | 0.0890552       | -1.3535    | 0.179874  | 0.519509  |
| Tasp1            | 3.40492   | 3.09319         | 0          | 1         | 1         |
| Esf1             | 1.47122   | 1.61833         | 0.137489   | 0.485904  | 0.777385  |
| Flrt3            | 10.3551   | 26.1554         | 1.33677    | 0         | 0         |
| Kif16b_j5        | 0.526593  | 0 -1.79769e+308 | 5.97E-07   | 2.64E-05  |           |
| Kif16b_j6        | 4.29985   | 2.81909         | -0.609054  | 1.45E-05  | 0.0004252 |
| Kif16b           | 1.75702   | 1.50268         | -0.225588  | 0.199372  | 0.542324  |
| Bfsp1            | 0.405469  | 0.270439        | -0.584291  | 0.285828  | 0.634576  |
| Bfsp1_j1         | 0.294127  | 0 -1.79769e+308 | 3.53E-05   | 0.0008864 |           |
| Snx5_j2          | 0.245277  | 0.0268532       | -3.19125   | 0.0389767 | 0.220157  |
| Snx5             | 3.92045   | 4.18306         | 0.0935379  | 0.583157  | 0.833121  |
| Ovol2            | 0.525018  | 0.605659        | 0.206141   | 0.572544  | 0.827161  |
| Rbbp9            | 3.74411   | 3.77263         | 0          | 1         | 1         |
| Crnk11           | 0.615514  | 0.623247        | 0.0180138  | 0.918707  | 0.974658  |
| Ralgapa2_j7      | 1.20704   | 0.530221        | -1.18681   | 1.29E-08  | 8.85E-07  |
| Thbd             | 5.31677   | 5.81046         | 0.128103   | 0.263139  | 0.611993  |
| Cd93             | 0.383395  | 0.33985         | -0.173933  | 0.57745   | 0.829703  |
| Napb             | 31.7084   | 28.5151         | 0          | 1         | 1         |
| Cst3             | 312.74    | 371.213         | 0.247286   | 0.0039698 | 0.042668  |
| Zfp120_j2        | 0.299572  | 0.25546         | 0          | 1         | 1         |
| Gm14127          | 1.97675   | 2.13246         | 0.109394   | 0.740508  | 0.909073  |
| Gm14121          | 16.7086   | 15.5152         | -0.106913  | 0.361736  | 0.696116  |
| 2310001A20Rik_j1 | 15.0528   | 15.7515         | 0          | 1         | 1         |
| 2310001A20Rik    | 13.1738   | 12.4464         | 0          | 1         | 1         |
| Acss1            | 0.973119  | 0.94765         | -0.0382621 | 0.864613  | 0.956931  |

|                  |           |                 |            |           |           |
|------------------|-----------|-----------------|------------|-----------|-----------|
| Abhd12           | 3.03796   | 2.3705          | -0.357908  | 0.0014367 | 0.0190759 |
| Ninl_j1          | 0.528065  | 0.110791        | -2.25287   | 0.02253   | 0.15314   |
| Ninl             | 0.276572  | 0.229058        | -0.271938  | 0.470017  | 0.767947  |
| Snph             | 0.982889  | 0.303492        | 0          | 1         | 1         |
| Snph_j4          | 1.93304   | 1.93911         | 0          | 1         | 1         |
| Snph_j7          | 9.02402   | 6.77508         | 0          | 1         | 1         |
| Psmf1            | 19.4903   | 18.7597         | -0.0551267 | 0.564188  | 0.823148  |
| Fam110a          | 1.66482   | 1.61218         | -0.0463528 | 0.82948   | 0.944941  |
| Gm14166          | 66.8918   | 80.7225         | 0.271141   | 0.0134681 | 0.106609  |
| Rbck1            | 12.0713   | 11.0419         | 0          | 1         | 1         |
| Rbck1_j3         | 7.78335   | 6.4704          | 0          | 1         | 1         |
| Trib3_j2         | 1.17431   | 0.690419        | 0          | 1         | 1         |
| Trib3_j3         | 0.403704  | 1.33176         | 0          | 1         | 1         |
| Trib3            | 1.18958   | 2.03179         | 0          | 1         | 1         |
| Nrsn2            | 2.70058   | 2.35588         | -0.196999  | 0.365947  | 0.699851  |
| Sox12            | 6.11078   | 5.89671         | -0.0514456 | 0.653699  | 0.867558  |
| Bcl2l1           | 15.7306   | 12.2355         | 0          | 1         | 1         |
| Bcl2l1           | 2.11832   | 2.21179         | 0          | 1         | 1         |
| Foxs1            | 0.161031  | 0.0750232       | -1.10193   | 0.352128  | 0.689187  |
| Dusp15           | 2.04622   | 1.61727         | 0          | 1         | 1         |
| Pdrg1_j3         | 11.0367   | 0.279639        | 0          | 1         | 1         |
| Pdrg1_j4         | 2.47942   | 12.1122         | 0          | 1         | 1         |
| Pdrg1_j5         | 0.384495  | 0               | 0          | 1         | 1         |
| Tspyl3           | 4.23154   | 4.08253         | -0.0517199 | 0.676988  | 0.878628  |
| Plagl2           | 0.401959  | 0.369521        | -0.121393  | 0.716056  | 0.897492  |
| AK010870_j1      | 0.0871003 | 0 -1.79769e+308 |            | 0.0276374 | 1         |
| AK010870_j6      | 0.19218   | 0.222799        | 0.213283   | 0.769646  | 0.921491  |
| AK010870_j2      | 0.0791378 | 0 -1.79769e+308 |            | 0.0185413 | 1         |
| 8430427H17Rik_j5 | 9.17506   | 8.35331         | 0          | 1         | 1         |
| 8430427H17Rik    | 5.63895   | 1.50478         | 0          | 1         | 1         |
| 8430427H17Rik_j2 | 1.62369   | 0.932806        | 0          | 1         | 1         |
| Commd7           | 10.246    | 11.4606         | 0.161623   | 0.124564  | 0.439858  |
| Cdk5rap1_j2      | 0.348812  | 0.31991         | -0.124783  | 0.835421  | 0.947056  |
| Cdk5rap1         | 1.65238   | 1.7311          | 0.0671458  | 0.771072  | 0.922274  |
| Snta1            | 5.08032   | 5.87624         | 0.209976   | 0.140729  | 0.466597  |
| Necab3_j10       | 1.99031   | 1.13732         | 0          | 1         | 1         |
| Pxmp4            | 5.24897   | 5.32772         | 0.0214859  | 0.87336   | 0.959842  |
| Ahcy_j3          | 0.121499  | 0.0173195       | -2.81048   | 0.157486  | 1         |
| Pigu             | 2.09482   | 2.00084         | -0.0662219 | 0.690091  | 0.885202  |
| Ncoa6_j3         | 5.09915   | 5.10016         | 0.00028622 | 0.997864  | 0.999228  |
| Ggt7             | 21.0178   | 21.753          | 0.0495999  | 0.609071  | 0.84604   |
| Gss              | 4.79892   | 4.73923         | 0          | 1         | 1         |
| Trpc4ap          | 44.4736   | 38.7371         | 0          | 1         | 1         |
| Edem2            | 10.6307   | 10.0785         | -0.0769457 | 0.553766  | 0.817269  |
| Uqcc_j4          | 7.33127   | 7.73045         | 0          | 1         | 1         |
| Uqcc_j7          | 12.948    | 12.8817         | 0          | 1         | 1         |
| Uqcc             | 5.28024   | 4.73976         | 0          | 1         | 1         |

|                  |           |           |              |           |           |
|------------------|-----------|-----------|--------------|-----------|-----------|
| 6430550D23Rik_j1 | 0.0363638 | 0.0604222 | 0.732575     | 0.637997  | 1         |
| Cpne1_j1         | 0.339533  | 0.286796  | 0            | 1         | 1         |
| Cpne1            | 10.9749   | 9.99314   | 0            | 1         | 1         |
| Nfs1             | 6.40566   | 5.8062    | 0            | 1         | 1         |
| Rbm39            | 0.108033  | 0.0306637 | 0            | 1         | 1         |
| AK015092_j3      | 0.0822817 | 0.11305   | 0.458323     | 0.64079   | 1         |
| AK015092_j9      | 0.773179  | 0.542     | -0.512508    | 0.170256  | 0.507195  |
| Gm14230          | 0.140283  | 0.319748  | 1.1886       | 0.021614  | 0.148698  |
| Gm14230_j3       | 0.199572  | 0.175305  | -0.187042    | 0.75961   | 0.91718   |
| Gm14230_j1       | 0.193382  | 0.0737142 | -1.39144     | 0.0988988 | 0.388994  |
| Ndr3             | 9.51453   | 8.23697   | 0            | 1         | 1         |
| Ndr3             | 39.1776   | 29.2092   | 0            | 1         | 1         |
| Dsn1             | 0.220895  | 0.26319   | 0.252743     | 0.557817  | 0.819817  |
| 9830001H06Rik    | 0.685308  | 0.853516  | 0            | 1         | 1         |
| Samhd1_j1        | 1.04515   | 0.92405   | -0.177672    | 0.56698   | 0.82484   |
| Samhd1           | 7.19297   | 6.88701   | -0.0627095   | 0.591575  | 0.837138  |
| 4922505G16Rik_j1 | 0.178766  | 0.167016  | -0.0980855   | 0.865792  | 0.957235  |
| Gm14286          | 0.084293  | 0.062323  | -0.435648    | 0.583068  | 1         |
| Blcap            | 10.7163   | 9.71768   | 0            | 1         | 1         |
| Blcap            | 3.33466   | 4.52681   | 0            | 1         | 1         |
| Tti1             | 2.13875   | 1.99662   | 0            | 1         | 1         |
| Tgm2             | 2.83626   | 3.86628   | 0.446956     | 0.0010763 | 0.015147  |
| D630003M21Rik_j7 | 0         | 0.117308  | 1.79769e+308 | 0.044761  | 1         |
| 9430008C03Rik_j4 | 0.780582  | 0.929272  | 0.251552     | 0.397227  | 0.721634  |
| 9430008C03Rik    | 0.276145  | 0.134181  | -1.04125     | 0.0773974 | 0.336753  |
| 9430008C03Rik_j8 | 0.402171  | 0.469821  | 0.224301     | 0.659457  | 0.870731  |
| Mafb             | 0.692653  | 1.0917    | 0.656368     | 0.0013541 | 0.0182323 |
| Zhx3_j2          | 2.75434   | 2.80943   | 0.0285749    | 0.811884  | 0.938322  |
| Chd6_j2          | 3.2765    | 2.59154   | 0            | 1         | 1         |
| Ptptr_j4         | 0.134415  | 0.207853  | 0            | 1         | 1         |
| Ptptr_j5         | 0.571733  | 0.807713  | 0            | 1         | 1         |
| Gm11451          | 7.86621   | 8.86513   | 0.172474     | 0.302661  | 0.648644  |
| Fitm2_j1         | 3.07038   | 0.267138  | 0            | 1         | 1         |
| Fitm2_j2         | 1.02529   | 0.237719  | 0            | 1         | 1         |
| Fitm2            | 7.8322    | 6.62764   | 0            | 1         | 1         |
| Serinc3          | 29.9444   | 30.9707   | 0.0486137    | 0.571736  | 0.827078  |
| Ada_j1           | 0.101171  | 0.0396869 | -1.35005     | 0.365954  | 1         |
| Ada              | 0.96839   | 0.860162  | -0.170979    | 0.583147  | 0.833121  |
| Rims4_j2         | 0.323457  | 0.713207  | 0            | 1         | 1         |
| Rims4            | 1.18502   | 1.02369   | 0            | 1         | 1         |
| Tomm34_j2        | 21.1322   | 18.4472   | 0            | 1         | 1         |
| Tomm34           | 14.9593   | 9.22553   | 0            | 1         | 1         |
| Wfdc5_j2         | 0.148811  | 0.110736  | -0.426354    | 0.726274  | 0.902924  |
| Slpi             | 0.463786  | 0.300286  | -0.62712     | 0.23547   | 0.582685  |
| Matn4            | 0.942656  | 0.748619  | -0.332499    | 0.175309  | 0.513687  |
| Sdc4             | 14.45     | 15.0533   | 0.0590096    | 0.585744  | 0.83407   |
| Spinlw1          | 0.330088  | 0.253621  | -0.380177    | 0.411544  | 0.730729  |

|               |           |                 |            |           |           |
|---------------|-----------|-----------------|------------|-----------|-----------|
| Wfdc3         | 1.58215   | 3.83211         | 1.27625    | 9.55E-08  | 5.16E-06  |
| Wfdc3_j1      | 0.0169914 | 0.0603759       | 1.82917    | 0.455273  | 1         |
| Acot8         | 2.04172   | 2.21342         | 0          | 1         | 1         |
| Pltp_j1       | 13.6825   | 16.6488         | 0.283091   | 0.010796  | 0.0905627 |
| Zfp335_j5     | 0.0820876 | 0 -1.79769e+308 |            | 2.46E-09  | 1         |
| Zfp335_j4     | 0.139546  | 0.23795         | 0.769916   | 0.00847   | 0.0757175 |
| Zfp335_j7     | 1.3034    | 1.03156         | -0.337457  | 0.112258  | 0.416968  |
| Ncoa5_j2      | 2.94832   | 2.96217         | 0.00676106 | 0.970663  | 0.99168   |
| Ncoa5         | 6.91941   | 7.65391         | 0.145547   | 0.242538  | 0.590017  |
| Cdh22         | 0.636932  | 0.546625        | -0.220588  | 0.398979  | 0.72264   |
| Slc35c2_j3    | 1.30739   | 2.79555         | 0          | 1         | 1         |
| Slc35c2_j4    | 0.945871  | 0.868924        | 0          | 1         | 1         |
| Slc35c2_j5    | 3.44663   | 2.87504         | 0          | 1         | 1         |
| Elmo2_j1      | 9.45319   | 9.59839         | 0          | 1         | 1         |
| Elmo2         | 1.2251    | 2.3441          | 0          | 1         | 1         |
| Elmo2         | 5.66986   | 5.20569         | 0          | 1         | 1         |
| Zfp663_j1     | 0.0823929 | 0 -1.79769e+308 |            | 0.0034716 | 1         |
| Zfp663_j2     | 0.337091  | 0 -1.79769e+308 |            | 3.91E-10  | 3.51E-08  |
| Zfp334        | 0.55694   | 0.48821         | 0          | 1         | 1         |
| Slc13a3       | 2.33632   | 1.94935         | -0.261241  | 0.129172  | 0.447938  |
| 2810408M09Rik | 1.68003   | 1.72384         | 0          | 1         | 1         |
| Gm11460       | 49.635    | 54.29           | 0.12933    | 0.316394  | 0.660085  |
| Zmynd8_j11    | 0.230675  | 0               | 0          | 1         | 1         |
| Zmynd8_j12    | 0.548542  | 1.00682         | 0          | 1         | 1         |
| Sulf2_j1      | 5.27356   | 5.38855         | 0          | 1         | 1         |
| Sulf2         | 0.469134  | 0.494338        | 0          | 1         | 1         |
| Gm14267_j1    | 0.0962465 | 0 -1.79769e+308 |            | 0.029798  | 1         |
| Prex1_j2      | 4.30468   | 4.33153         | 0.00897217 | 0.960932  | 0.988919  |
| Prex1_j3      | 0.0883261 | 0 -1.79769e+308 |            | 0.0002477 | 1         |
| Prex1         | 3.07436   | 2.25214         | -0.448989  | 0.0015332 | 0.0201046 |
| Stau1         | 12.0807   | 13.1206         | 0          | 1         | 1         |
| Gm11470       | 8.41278   | 8.08019         | -0.0581943 | 0.698345  | 0.888784  |
| Znfx1_j1      | 1.10804   | 0.739989        | 0          | 1         | 1         |
| Znfx1         | 4.18104   | 2.89136         | 0          | 1         | 1         |
| Kcnb1_j6      | 1.16705   | 0.780866        | 0          | 1         | 1         |
| B4galt5_j3    | 0.954703  | 0.000341408     | 0          | 1         | 1         |
| B4galt5_j5    | 0.76849   | 0               | 0          | 1         | 1         |
| B4galt5       | 15.0665   | 12.8359         | 0          | 1         | 1         |
| Spata2_j2     | 5.33727   | 3.95338         | 0          | 1         | 1         |
| Tmem189       | 44.0625   | 43.4281         | 0          | 1         | 1         |
| Fam65c_j6     | 0.166196  | 0 -1.79769e+308 |            | 3.68E-05  | 0.0009201 |
| Fam65c        | 0.0690625 | 0.0704311       | 0.0283095  | 0.965582  | 1         |
| Fam65c_j8     | 0.197194  | 0.0246621       | -2.99924   | 0.0199272 | 0.140434  |
| Adnp          | 5.67556   | 5.15636         | 0          | 1         | 1         |
| Kcng1_j1      | 0.917064  | 1.12777         | 0.298382   | 0.141439  | 0.467806  |
| Atp9a_j3      | 40.327    | 36.1607         | 0          | 1         | 1         |
| Atp9a_j4      | 7.61738   | 26.1882         | 0          | 1         | 1         |



|               |             |                 |             |           |           |
|---------------|-------------|-----------------|-------------|-----------|-----------|
| Atp9a         | 64.8485     | 54.8048         | 0           | 1         | 1         |
| Zfp64         | 4.12983     | 4.46868         | 0.113765    | 0.438     | 0.747865  |
| XLOC_019370   | 0.16306     | 0.0865252       | -0.914213   | 0.24209   | 0.589516  |
| Zfp217_j2     | 0.0674406   | 0 -1.79769e+308 |             | 0.0044714 | 1         |
| Bcas1_j2      | 0.998381    | 1.20545         | 0           | 1         | 1         |
| Bcas1_j1      | 0.830957    | 1.0386          | 0           | 1         | 1         |
| Aurka         | 2.20336     | 2.09957         | 0           | 1         | 1         |
| Bmp7          | 0.216197    | 0.267746        | 0.308521    | 0.473806  | 0.770193  |
| Ctcf_l_j1     | 0.108558    | 0.0823989       | -0.397766   | 0.751846  | 1         |
| Zbp1_j4       | 0.0485961   | 0.0196697       | -1.30486    | 0.559263  | 1         |
| Zbp1          | 0.232214    | 0.222885        | -0.0591539  | 0.925362  | 0.976852  |
| Pmepa1        | 18.5648     | 19.5189         | 0.072307    | 0.431833  | 0.743877  |
| Ppp4r1l-ps_j1 | 0.0682571   | 0.020704        | 0           | 1         | 1         |
| Ppp4r1l-ps_j2 | 0.389655    | 0.344397        | 0           | 1         | 1         |
| Ppp4r1l-ps_j6 | 0.0508589   | 0               | 0           | 1         | 1         |
| Ppp4r1l-ps_j7 | 0.177906    | 0.125613        | 0           | 1         | 1         |
| Ctsz          | 26.443      | 34.486          | 0.383125    | 0.0002152 | 0.0040741 |
| Atp5e         | 125.916     | 131.431         | 0.0618443   | 0.525223  | 0.8006    |
| Slmo2_j1      | 13.3004     | 13.7937         | 0           | 1         | 1         |
| Slmo2         | 9.17915     | 7.79634         | 0           | 1         | 1         |
| Gm14326_j1    | 0.499243    | 0.470631        | -0.0851451  | 0.709571  | 0.894305  |
| Ppp1r3d       | 2.41608     | 2.8061          | 0.215897    | 0.158208  | 0.492412  |
| Taf4a_j4      | 1.65649     | 1.58027         | 0           | 1         | 1         |
| Taf4a_j5      | 0.251652    | 0.0879261       | 0           | 1         | 1         |
| Taf4a_j6      | 0.182476    | 0.0546329       | 0           | 1         | 1         |
| Taf4a_j2      | 1.98574     | 2.54115         | 0           | 1         | 1         |
| Psm7          | 24.9918     | 27.2157         | 0           | 1         | 1         |
| Psm7_j1       | 110.34      | 116.135         | 0           | 1         | 1         |
| Hrh3_j3       | 0.722132    | 0.0941208       | -2.93968    | 0.0007816 | 0.0117553 |
| Hrh3          | 0.312116    | 0.118712        | -1.39461    | 0.0553009 | 0.274555  |
| Hrh3_j2       | 0.113376    | 2.89E-05        | -11.9356    | 0.967247  | 1         |
| Lama5_j3      | 0.0524495   | 0.175961        | 1.74626     | 0.0020516 | 0.0255028 |
| Cables2_j6    | 0.483742    | 0.287102        | 0           | 1         | 1         |
| Cables2_j5    | 2.01944     | 0.927642        | 0           | 1         | 1         |
| AK045814_j4   | 0.484216    | 0.248537        | -0.962188   | 0.100024  | 0.391628  |
| AK045814      | 0.000887003 | 0.0496742       | 5.80741     | 0.662473  | 1         |
| AK045814_j1   | 0.305461    | 0.304327        | -0.00536614 | 0.993278  | 0.997985  |
| AK045814_j9   | 0.839107    | 0.454367        | -0.884995   | 0.0464707 | 0.247267  |
| AK045814_j10  | 0.242054    | 0.0769671       | -1.65301    | 0.17349   | 0.511284  |
| Dido1         | 0.80447     | 0.512723        | 0           | 1         | 1         |
| Dido1         | 0.483801    | 0.483175        | 0           | 1         | 1         |
| Ythdf1_j1     | 0.245448    | 0 -1.79769e+308 |             | 1.17E-05  | 0.0003535 |
| Ythdf1        | 2.81247     | 2.62846         | -0.0976224  | 0.623074  | 0.852674  |
| Nkain4        | 7.16438     | 7.05035         | -0.023147   | 0.889103  | 0.964761  |
| Chrna4        | 0.917072    | 0.355754        | -1.36616    | 1.54E-05  | 0.0004475 |
| Eef1a2_j3     | 426.836     | 399.199         | 0           | 1         | 1         |
| Eef1a2_j4     | 146.688     | 120.599         | 0           | 1         | 1         |

|              |            |                 |              |           |           |
|--------------|------------|-----------------|--------------|-----------|-----------|
| Srms         | 0.246108   | 0.279668        | 0.184424     | 0.661446  | 0.871676  |
| BC006779_j5  | 0.128079   | 0.0172743       | -2.89034     | 0.0091621 | 1         |
| BC006779_j15 | 0.0851026  | 0.0492955       | -0.787747    | 0.54779   | 1         |
| Gmeb2        | 4.29969    | 4.29852         | -0.000394234 | 0.997505  | 0.999228  |
| Stmn3_j2     | 2.60821    | 2.15279         | 0            | 1         | 1         |
| Stmn3        | 206.553    | 214.181         | 0            | 1         | 1         |
| Stmn3_j6     | 2.70769    | 4.05935         | 0            | 1         | 1         |
| Arfrp1_j1    | 6.19164    | 6.21075         | 0.00444618   | 0.975692  | 0.992948  |
| Zbtb46_j2    | 0.461014   | 1.05569         | 1.1953       | 4.17E-06  | 0.0001444 |
| Zbtb46       | 1.13017    | 0.259454        | -2.12299     | 2.72E-05  | 0.0007112 |
| Znf512b_j1   | 1.65294    | 1.29803         | 0            | 1         | 1         |
| Znf512b_j3   | 4.01386    | 4.52715         | 0            | 1         | 1         |
| Samd10_j1    | 6.53999    | 7.96959         | 0            | 1         | 1         |
| Samd10_j2    | 3.12475    | 2.62642         | 0            | 1         | 1         |
| Samd10       | 4.38875    | 3.28423         | 0            | 1         | 1         |
| Samd10       | 3.43742    | 3.28022         | 0            | 1         | 1         |
| Rgs19        | 1.86202    | 1.59955         | 0            | 1         | 1         |
| Fam171a1_j3  | 4.34356    | 3.72107         | 0            | 1         | 1         |
| Acbd7_j2     | 0.165422   | 0.164475        | 0            | 1         | 1         |
| Acbd7_j1     | 0.372487   | 0.254637        | 0            | 1         | 1         |
| Acbd7_j3     | 0.795076   | 0.663959        | 0            | 1         | 1         |
| Dclre1c_j2   | 0.754381   | 1.05138         | 0            | 1         | 1         |
| Cdnf_j1      | 0.0853478  | 0 -1.79769e+308 | 0.0010304    |           | 1         |
| Frmd4a_j4    | 0          | 0.0831499       | 0            | 1         | 1         |
| Frmd4a_j2    | 2.30462    | 1.16565         | 0            | 1         | 1         |
| Bend7        | 0.300849   | 0.242408        | -0.311598    | 0.495691  | 0.782921  |
| Bend7_j6     | 0.494145   | 0.0132466       | -5.22124     | 0.023263  | 0.1563    |
| Nudt5_j2     | 1.51483    | 1.62662         | 0.102722     | 0.508617  | 0.790419  |
| Ankrd16      | 0.801888   | 0.743748        | 0            | 1         | 1         |
| Ankrd16_j13  | 0.555829   | 0.64421         | 0            | 1         | 1         |
| Stam_j3      | 0.0534219  | 0.132938        | 0            | 1         | 1         |
| Cacnb2_j5    | 0.248695   | 0.176214        | -0.497052    | 0.407705  | 0.728185  |
| XLOC_017895  | 0.116338   | 0.132817        | 0.191108     | 0.876662  | 1         |
| Plxdc2_j2    | 3.07339    | 3.93911         | 0.358038     | 0.0029795 | 0.0342587 |
| XLOC_017896  | 1.10138    | 1.14031         | 0.0501202    | 0.794683  | 0.931482  |
| Mllt10_j1    | 3.30757    | 2.7207          | -0.281793    | 0.145899  | 0.473936  |
| Mllt10_j3    | 1.01916    | 1.16255         | 0.189904     | 0.367691  | 0.701085  |
| Bmi1_j2      | 0.6496     | 1.39209         | 0            | 1         | 1         |
| Etl4_j13     | 0.604212   | 0.383563        | 0            | 1         | 1         |
| Etl4_j14     | 2.35763    | 0.903999        | 0            | 1         | 1         |
| XLOC_017921  | 0.0556935  | 0.159919        | 0            | 1         | 1         |
| XLOC_017921  | 0.00553018 | 0.0860662       | 0            | 1         | 1         |
| Wdr85        | 2.19473    | 2.15025         | -0.029536    | 0.863914  | 0.956651  |
| Pnpla7_j7    | 0.159347   | 0.114945        | -0.471231    | 0.584269  | 0.833357  |
| Nelf         | 6.73531    | 6.23903         | 0            | 1         | 1         |
| Npdc1_j2     | 26.5415    | 30.3619         | 0.194012     | 0.113429  | 0.419202  |
| Fut7         | 0.092775   | 0.0419493       | -1.14509     | 0.324989  | 1         |

|                  |             |                        |            |           |           |
|------------------|-------------|------------------------|------------|-----------|-----------|
| Abca2_j7         | 0.885199    | 1.00085                | 0.177158   | 0.388167  | 0.715717  |
| Fbxw5            | 20.0659     | 19.6256                | -0.0320067 | 0.772786  | 0.922935  |
| Kcnt1_j4         | 12.4936     | 10.6458                | 0          | 1         | 1         |
| mKIAA1422        | 20.899      | 17.9867                | 0          | 1         | 1         |
| Gpsm1_j2         | 0.000175175 | 0.120277               | 0          | 1         | 1         |
| XLOC_017948      | 0.640399    | 0.604844               | 0          | 1         | 1         |
| Pmpca_j1         | 1.83081     | 1.6108                 | 0          | 1         | 1         |
| Pmpca_j4         | 11.1181     | 11.8177                | 0          | 1         | 1         |
| AK075572_j1      | 1.48044     | 1.53621                | 0.053349   | 0.810922  | 0.938047  |
| Surf2            | 3.62383     | 3.80464                | 0.0702444  | 0.597536  | 0.840303  |
| Gm711_j2         | 0.0578302   | 0 -1.79769e+308        | 0.0845567  |           | 1         |
| Adamts12         | 0.161566    | 0.224459               | 0.474327   | 0.327797  | 0.670398  |
| Rxra_j1          | 0.00436188  | 0.628229               | 0          | 1         | 1         |
| Col5a1_j5        | 0.00204449  | 0.0957256              | 0          | 1         | 1         |
| F730016J06Rik_j4 | 0.281165    | 0.268655               | -0.0656664 | 0.831795  | 0.945814  |
| Gm347_j3         | 0.0329646   | 0.0604744              | 0.875407   | 0.316272  | 1         |
| Gm347_j4         | 0.216849    | 0.0464966              | -2.22149   | 0.0031855 | 0.0361665 |
| Ak8_j1           | 0           | 0.0923732 1.79769e+308 | 0.0389113  |           | 1         |
| Ak8_j2           | 0.900382    | 0.852732               | -0.0784443 | 0.814594  | 0.939483  |
| Ddx31            | 1.23893     | 1.25521                | 0          | 1         | 1         |
| Ddx31_j4         | 0.256376    | 0.481817               | 0          | 1         | 1         |
| Setx             | 0.784279    | 0.729712               | -0.104039  | 0.752434  | 0.914477  |
| Med27_j1         | 2.54827     | 2.28932                | -0.154598  | 0.75651   | 0.91608   |
| Rapgef1_j2       | 0.311715    | 0.538327               | 0          | 1         | 1         |
| Rapgef1          | 3.06577     | 3.18716                | 0          | 1         | 1         |
| Rapgef1_j7       | 0.761782    | 0.715585               | 0          | 1         | 1         |
| Odf2_j7          | 0           | 0.184222 1.79769e+308  | 0.0112424  | 0.0935025 |           |
| Odf2_j8          | 0.372027    | 0.249061               | -0.578908  | 0.286641  | 0.635431  |
| Odf2_j10         | 3.15693     | 3.45857                | 0.131653   | 0.455232  | 0.759015  |
| Odf2_j14         | 0.789958    | 1.13232                | 0.519434   | 0.261816  | 0.610988  |
| Spna2_j7         | 0.952164    | 0.58892                | 0          | 1         | 1         |
| Spna2_j11        | 68.5341     | 60.7565                | 0          | 1         | 1         |
| Set_j2           | 0.632252    | 0.746826               | 0          | 1         | 1         |
| Set_j6           | 2.48095     | 8.26606                | 0          | 1         | 1         |
| Endog            | 0.283037    | 0.206552               | 0          | 1         | 1         |
| Lrrc8a           | 3.69285     | 4.95295                | 0          | 1         | 1         |
| Lrrc8a_j3        | 3.47655     | 0.939735               | 0          | 1         | 1         |
| Phyhd1_j1        | 1.115       | 1.49928                | 0          | 1         | 1         |
| Ppp2r4_j7        | 9.61695     | 23.5869                | 0          | 1         | 1         |
| Usp20_j3         | 13.6275     | 12.0257                | 0          | 1         | 1         |
| Usp20_j5         | 1.58555     | 1.08164                | 0          | 1         | 1         |
| Fubp3_j2         | 0.835617    | 0.37786                | 0          | 1         | 1         |
| Exosc2_j1        | 1.97812     | 1.34723                | -0.554135  | 0.154338  | 0.487404  |
| Lamc3_j5         | 0.436414    | 0.548722               | 0.330378   | 0.304421  | 0.650023  |
| Nup214           | 2.27764     | 1.96492                | -0.213066  | 0.157065  | 0.490842  |
| Golga2           | 2.41951     | 2.22405                | -0.121524  | 0.259936  | 0.608587  |
| Ciz1             | 0           | 0.119358               | 0          | 1         | 1         |

|                  |           |                 |              |           |           |
|------------------|-----------|-----------------|--------------|-----------|-----------|
| Ciz1_j5          | 0.58217   | 0.601605        | 0            | 1         | 1         |
| Ptges2_j2        | 6.09658   | 5.02051         | -0.280167    | 0.214901  | 0.560432  |
| Ptges2_j6        | 12.002    | 11.8147         | -0.0226972   | 0.875471  | 0.960411  |
| Fam102a_j2       | 19.6378   | 17.0434         | -0.204419    | 0.0215216 | 0.148188  |
| St6galnac4       | 0.323928  | 0.615175        | 0.925323     | 0.0017484 | 0.0224505 |
| St6galnac6_j4    | 0.72609   | 0.690717        | -0.0720529   | 0.900614  | 0.968396  |
| Ak1_j1           | 40.0669   | 34.2058         | 0            | 1         | 1         |
| XLOC_018026      | 0.148822  | 0.09215         | -0.691533    | 0.468051  | 0.766788  |
| Angptl2_j2       | 2.06713   | 2.60176         | 0            | 1         | 1         |
| Mapkap1          | 2.45092   | 1.96926         | 0            | 1         | 1         |
| Mapkap1_j4       | 4.16475   | 6.65569         | 0            | 1         | 1         |
| D730039F16Rik_j1 | 0.0768705 | 0.0687925       | -0.160179    | 0.932363  | 1         |
| Gsn              | 12.3469   | 16.9971         | 0            | 1         | 1         |
| Rabgap1_j2       | 3.07233   | 5.67348         | 0            | 1         | 1         |
| XLOC_018045      | 0.0998026 | 0.124669        | 0.320954     | 0.736181  | 1         |
| AK163151         | 0.604351  | 0.608           | 0.00868465   | 0.984606  | 0.995392  |
| Gm13474_j2       | 0.183621  | 0.064388        | -1.51187     | 0.355261  | 0.691216  |
| Kif5c            | 28.3873   | 25.4536         | 0            | 1         | 1         |
| Kif5c_j5         | 21.9721   | 16.063          | 0            | 1         | 1         |
| Kif5c_j6         | 1.26473   | 12.2209         | 0            | 1         | 1         |
| Lypd6b_j2        | 0.588814  | 0 -1.79769e+308 |              | 8.64E-10  | 7.32E-08  |
| Lypd6b_j6        | 0.281596  | 0 -1.79769e+308 |              | 5.05E-05  | 0.0012017 |
| XLOC_018073      | 0.185483  | 0.193667        | 0.0622882    | 0.951017  | 0.985865  |
| Upp2             | 0.0670128 | 0.12561         | 0.906448     | 0.205894  | 1         |
| Upp2_j6          | 0.575955  | 0.428277        | -0.42741     | 0.19696   | 0.539831  |
| Gm13558_j1       | 1.38622   | 1.02565         | -0.434609    | 0.193772  | 0.536037  |
| Upp2_j15         | 0.18859   | 0.000291323     | -9.33842     | 0.789429  | 0.92976   |
| Pkp4_j1          | 0.0394719 | 0.0767551       | 0.959437     | 0.335111  | 1         |
| Tanc1_j3         | 3.24424   | 2.29166         | 0            | 1         | 1         |
| Tanc1_j7         | 7.52568   | 6.05629         | 0            | 1         | 1         |
| AK050909_j1      | 0.13025   | 0.231357        | 0.828835     | 0.249784  | 0.597201  |
| Tank             | 7.54626   | 7.86494         | 0.0596737    | 0.662624  | 0.872127  |
| Psm14_j3         | 25.0268   | 26.3937         | 0            | 1         | 1         |
| Gca              | 3.46763   | 3.32078         | 0            | 1         | 1         |
| Scn2a1_j7        | 0         | 0.0664536       | 1.79769e+308 | 0.10613   | 1         |
| Scn2a1_j11       | 0.192558  | 0.0431108       | -2.15917     | 0.0984397 | 0.387939  |
| XLOC_018108      | 0.246309  | 0.340036        | 0            | 1         | 1         |
| Ppig             | 3.11151   | 3.76025         | 0            | 1         | 1         |
| Ppig_j1          | 1.09389   | 1.66186         | 0            | 1         | 1         |
| Ppig             | 4.59989   | 3.56691         | 0            | 1         | 1         |
| Phospho2         | 3.93065   | 3.34516         | 0            | 1         | 1         |
| Ubr3_j1          | 0.16567   | 0.1126          | -0.557104    | 0.30864   | 0.653546  |
| Ubr3             | 3.82738   | 2.70411         | -0.501205    | 0.0007278 | 0.0110786 |
| Gorasp2_j1       | 0.0512072 | 3.57384         | 0            | 1         | 1         |
| Dcaf17_j3        | 0.0144961 | 0.43199         | 4.89726      | 0.001858  | 0.0235843 |
| Dcaf17_j1        | 0.164326  | 0.0217023       | -2.92065     | 0.0332024 | 0.198786  |
| Dcaf17_j5        | 0.221917  | 0 -1.79769e+308 |              | 0.001131  | 0.0157876 |

|                  |           |           |              |           |           |
|------------------|-----------|-----------|--------------|-----------|-----------|
| Dync1i2_j4       | 0.0499105 | 0         | 0            | 1         | 1         |
| Dync1i2_j8       | 2.60535   | 3.16176   | 0            | 1         | 1         |
| Metap1d_j7       | 0.497105  | 0.432126  | -0.202101    | 0.695009  | 0.887479  |
| XLOC_018136      | 0.0596012 | 0.0745819 | 0.323486     | 0.675463  | 1         |
| B230120H23Rik_j1 | 0         | 0.119398  | 1.79769e+308 | 0.0010816 | 1         |
| B230120H23Rik_j2 | 2.47303   | 4.03985   | 0.708022     | 1.43E-07  | 7.36E-06  |
| Cdca7_j2         | 0         | 0.0936386 | 1.79769e+308 | 0.101906  | 1         |
| AK013593         | 3.79214   | 4.05241   | 0.0957693    | 0.614597  | 0.847757  |
| AK029663_j1      | 0.297616  | 0.379147  | 0.349306     | 0.497729  | 0.783786  |
| Hoxd9_j1         | 4.02682   | 4.30921   | 0.0977812    | 0.610935  | 0.84666   |
| Hoxd9            | 5.87674   | 5.59232   | -0.0715701   | 0.640017  | 0.860827  |
| Hoxd4_j1         | 2.07003   | 2.45441   | 0.245721     | 0.0312559 | 0.190848  |
| Hoxd1            | 5.49724   | 3.7454    | -0.553589    | 0.0010845 | 0.0152202 |
| Mtx2_j3          | 27.5925   | 26.7445   | -0.0450312   | 0.7527    | 0.914482  |
| Agps_j2          | 2.74244   | 4.45811   | 0            | 1         | 1         |
| Plekha3_j4       | 13.8072   | 12.6411   | -0.1273      | 0.363021  | 0.697184  |
| Ube2e3_j1        | 0         | 0.0756475 | 0            | 1         | 1         |
| Ssfa2            | 4.18863   | 3.78275   | 0            | 1         | 1         |
| Ssfa2            | 3.03899   | 3.56433   | 0            | 1         | 1         |
| XLOC_018168      | 0.0602747 | 0.0673516 | 0.160161     | 0.888225  | 1         |
| Ppp1r1c          | 44.8199   | 31.6499   | -0.501938    | 1.61E-08  | 1.09E-06  |
| Ppp1r1c_j1       | 94.251    | 82.7924   | -0.18701     | 0.0452411 | 0.243436  |
| SKRP1            | 2.55801   | 3.1735    | 0            | 1         | 1         |
| Dusp19_j2        | 1.80594   | 2.72482   | 0            | 1         | 1         |
| Dusp19           | 0.323393  | 0.358676  | 0            | 1         | 1         |
| Nup35_j2         | 0.0824513 | 0.146869  | 0.832916     | 0.431065  | 1         |
| Zc3h15_j1        | 22.6052   | 24.6689   | 0.12604      | 0.332596  | 0.673845  |
| Itgav_j5         | 0         | 0.127483  | 0            | 1         | 1         |
| Itgav_j6         | 0.0490401 | 0.0438594 | 0            | 1         | 1         |
| Med19            | 1.39697   | 1.37773   | 0            | 1         | 1         |
| Slc43a3_j1       | 0.103953  | 0.179015  | 0.784142     | 0.445138  | 0.752824  |
| Ssrp1            | 0.25744   | 0.0648409 | 0            | 1         | 1         |
| BC027685_j1      | 0.0284047 | 0.247627  | 3.12396      | 0.0009181 | 0.0133511 |
| Nup160_j1        | 0.129994  | 0.129308  | -0.00763524  | 0.986943  | 1         |
| Nup160_j2        | 0.0198332 | 0.0513323 | 1.37195      | 0.19935   | 1         |
| Psmc3            | 56.7933   | 56.4674   | 0            | 1         | 1         |
| Sfpi1_j1         | 0.129973  | 0.229671  | 0.821352     | 0.30983   | 0.654431  |
| A330069E16Rik    | 0.545047  | 0.538042  | -0.0186614   | 0.975626  | 0.99292   |
| Pacsin3_j1       | 0.662403  | 0.69323   | 0            | 1         | 1         |
| Pacsin3_j2       | 0.577213  | 0.441001  | 0            | 1         | 1         |
| Arfgap2_j2       | 0.432674  | 0.323423  | -0.419858    | 0.245666  | 0.593119  |
| Arhgap1          | 0.691691  | 0.874874  | 0            | 1         | 1         |
| Chrm4            | 0.699615  | 0.650435  | 0            | 1         | 1         |
| Phf21a_j17       | 0.57761   | 0.214546  | 0            | 1         | 1         |
| Chst1_j4         | 0.525477  | 0.660949  | 0            | 1         | 1         |
| Abtb2_j1         | 14.252    | 12.7622   | 0            | 1         | 1         |
| Lmo2_j1          | 0         | 0.096451  | 0            | 1         | 1         |

|                  |           |           |               |           |           |
|------------------|-----------|-----------|---------------|-----------|-----------|
| Cd59a_j4         | 1.27165   | 1.28132   | 0             | 1         | 1         |
| Cd59a_j6         | 1.499     | 2.14733   | 0             | 1         | 1         |
| Cstf3_j2         | 4.51529   | 6.20756   | 0             | 1         | 1         |
| Cstf3_j5         | 0.0386116 | 0.095273  | 0             | 1         | 1         |
| Wt1_j3           | 0.0263904 | 0.214846  | 3.02522       | 0.0278843 | 0.177062  |
| Mpped2           | 1.65628   | 1.43139   | 0             | 1         | 1         |
| Mpped2_j2        | 3.95172   | 6.23347   | 0             | 1         | 1         |
| Kcna4_j1         | 0.0856377 | 0.0709857 | 0             | 1         | 1         |
| Lgr4_j2          | 9.37099   | 9.39788   | 0             | 1         | 1         |
| Ccdc34_j3        | 2.5589    | 3.36514   | 0.395145      | 0.136257  | 0.45927   |
| Slc12a6_j1       | 0.749189  | 0.726049  | 0             | 1         | 1         |
| 2410042D21Rik    | 1.55971   | 0.84938   | -0.876793     | 0.0030051 | 0.034463  |
| 2900064A13Rik_j1 | 27.7484   | 24.9093   | -0.155718     | 0.401188  | 0.724522  |
| Fmn1_j2          | 0.807943  | 2.13528   | 0             | 1         | 1         |
| Fmn1_j3          | 8.66738   | 5.42628   | 0             | 1         | 1         |
| AK083230_j2      | 0.104039  | 0.0704296 | -0.562874     | 0.629722  | 1         |
| Disp2_j1         | 0.0846958 | 0         | 0             | 1         | 1         |
| Disp2_j2         | 5.06427   | 3.64674   | 0             | 1         | 1         |
| D2Ert750e_j1     | 0.0678912 | 0.117668  | 0.793424      | 0.497938  | 1         |
| Ivd_j1           | 1.87065   | 1.02455   | -0.868544     | 0.0456152 | 0.244446  |
| XLOC_018297      | 0.182331  | 0.0254863 | -2.83876      | 0.0679959 | 0.3122    |
| Gm14088          | 11.8811   | 12.7935   | 0.106739      | 0.683979  | 0.881899  |
| Tyro3_j1         | 1.78831   | 1.06806   | -0.743612     | 0.0037942 | 0.0413312 |
| Mga_j10          | 0         | 0.0863217 | 1.79769e+308  | 0.0004071 | 1         |
| Mga_j11          | 0.357113  | 0.162182  | -1.13877      | 0.0071161 | 0.0667355 |
| Mapkbp1_j9       | 0.930231  | 1.9525    | 1.06967       | 2.94E-09  | 2.26E-07  |
| Mapkbp1_j8       | 0.114572  | 0.161003  | 0.490835      | 0.346866  | 0.685763  |
| Pla2g4b_j6       | 1.05028   | 0.90063   | -0.221763     | 0.556849  | 0.819299  |
| Capn3_j3         | 1.09282   | 1.18209   | 0             | 1         | 1         |
| Haus2_j1         | 7.73417   | 7.93695   | 0             | 1         | 1         |
| Tmem62_j1        | 4.08115   | 3.99602   | -0.0304091    | 0.847204  | 0.951638  |
| Tmem62_j2        | 8.76325   | 8.75088   | -0.00203866   | 0.988051  | 0.996422  |
| Adal_j2          | 0.400216  | 0.481195  | 0.265844      | 0.479206  | 0.773541  |
| Adal_j1          | 3.27194   | 3.05464   | -0.0991416    | 0.467516  | 0.766717  |
| Ckmt1_j1         | 24.6783   | 20.3675   | 0             | 1         | 1         |
| Serf2_j1         | 0.314322  | 0         | -1.79769e+308 | 7.02E-10  | 6.06E-08  |
| Casc4            | 6.07932   | 5.8546    | 0             | 1         | 1         |
| Pldn_j1          | 6.74302   | 6.36249   | -0.0838034    | 0.557134  | 0.819417  |
| Sema6d_j2        | 4.76821   | 4.2042    | 0             | 1         | 1         |
| Ctxn2_j3         | 0.62252   | 1.04294   | 0.744461      | 0.214652  | 0.560036  |
| Galk2            | 2.76679   | 2.46612   | 0             | 1         | 1         |
| Galk2_j2         | 0.119982  | 0.052314  | 0             | 1         | 1         |
| Galk2            | 3.06108   | 3.6502    | 0             | 1         | 1         |
| Fgf7             | 0.123889  | 0.190272  | 0.619018      | 0.407016  | 0.727764  |
| Fgf7_j3          | 0.278569  | 0.149633  | -0.896605     | 0.263917  | 0.612664  |
| Usp8_j4          | 12.0902   | 11.6541   | 0             | 1         | 1         |
| Ap4e1_j2         | 1.43101   | 1.59498   | 0             | 1         | 1         |

|                  |           |           |              |           |           |
|------------------|-----------|-----------|--------------|-----------|-----------|
| Blvra            | 10.3792   | 10.0976   | 0            | 1         | 1         |
| Snrnp200         | 0.434432  | 0.331766  | 0            | 1         | 1         |
| Gpat2_j1         | 0.0903352 | 0.060414  | -0.580405    | 0.62082   | 1         |
| Mrps5_j4         | 1.7979    | 2.02617   | 0.172437     | 0.621274  | 0.851544  |
| Mertk            | 0         | 0.0916581 | 1.79769e+308 | 0.0080185 | 1         |
| Mertk_j5         | 0.708494  | 1.03642   | 0.548785     | 0.110404  | 0.413489  |
| Tmem87b_j2       | 3.88435   | 3.42714   | -0.180665    | 0.240848  | 0.588146  |
| Zc3h6_j6         | 0.155884  | 0.298974  | 0.939545     | 0.146488  | 0.474802  |
| Zc3h6_j8         | 0.531322  | 0.351104  | -0.597688    | 0.160864  | 0.495486  |
| Zc3h6_j7         | 0.0826649 | 0.308843  | 1.90153      | 0.002418  | 0.0290788 |
| Polr1b_j2        | 1.84314   | 2.09514   | 0.184887     | 0.414599  | 0.732858  |
| Chchd5_j1        | 0.582271  | 1.63908   | 1.49312      | 0.07107   | 0.320489  |
| Slc20a1_j1       | 0.215858  | 0.0578842 | -1.89884     | 0.0092849 | 0.0811268 |
| Sirpa            | 0.518582  | 0.452259  | -0.197424    | 0.705191  | 0.892225  |
| Ebf3_j6          | 0.0785696 | 0.143984  | 0            | 1         | 1         |
| Vps16_j2         | 3.41787   | 3.22167   | 0            | 1         | 1         |
| Ptpa             | 0.662065  | 0.519625  | 0            | 1         | 1         |
| Mrps26_j2        | 22.9032   | 26.5058   | 0.210756     | 0.0703168 | 0.318545  |
| Itpa_j4          | 0.0706396 | 0.121292  | 0.77994      | 0.526781  | 1         |
| Itpa_j9          | 0.0666363 | 0.168977  | 0            | 1         | 1         |
| Atrn_j2          | 1.75373   | 5.12387   | 0            | 1         | 1         |
| Atrn_j3          | 4.49507   | 5.93116   | 0            | 1         | 1         |
| Hspa12b_j1       | 2.58901   | 2.39786   | 0            | 1         | 1         |
| Mavs             | 0.259778  | 0.126413  | -1.03913     | 0.0580058 | 0.2826    |
| Smox             | 13.1151   | 16.3536   | 0.318377     | 0.0041988 | 0.044419  |
| Prnp             | 205.084   | 198.483   | -0.0471962   | 0.586337  | 0.83433   |
| Gm14051_j1       | 0.0197902 | 0.0566676 | 0            | 1         | 1         |
| 1110034G24Rik    | 8.20157   | 8.57814   | 0.0647642    | 0.672566  | 0.876366  |
| Mcm8_j2          | 0.526569  | 0.473003  | 0            | 1         | 1         |
| Plcb4_j4         | 2.83841   | 0.986681  | 0            | 1         | 1         |
| Plcb4_j3         | 0.028219  | 0.071534  | 0            | 1         | 1         |
| Snap25_j2        | 39.0723   | 36.5825   | -0.0949928   | 0.437419  | 0.747672  |
| AK042765_j1      | 0.0525474 | 0.0676631 | 0.36475      | 0.788638  | 1         |
| Macro2_j3        | 0.0773079 | 0.109523  | 0.502541     | 0.797012  | 1         |
| XLOC_018427      | 0.269812  | 0.0281467 | -3.26092     | 0.0507437 | 0.26086   |
| Csrp2bp_j3       | 1.04711   | 0.617169  | -0.762676    | 0.013848  | 0.108638  |
| Csrp2bp_j2       | 0.156181  | 0.151432  | -0.0445495   | 0.946961  | 0.98431   |
| Sec23b           | 15.8055   | 15.1614   | 0            | 1         | 1         |
| Slc24a3_j1       | 2.85184   | 3.37507   | 0.243024     | 0.254504  | 0.602758  |
| Rin2_j6          | 0.393857  | 0.276468  | -0.51056     | 0.206746  | 0.551364  |
| 4930529M08Rik_j3 | 0.361054  | 0.320289  | -0.172841    | 0.73476   | 0.906438  |
| Gzf1_j1          | 2.46232   | 1.98344   | 0            | 1         | 1         |
| Gzf1_j2          | 2.30048   | 2.87424   | 0            | 1         | 1         |
| Cstl1_j9         | 0.162324  | 0.270057  | 0            | 1         | 1         |
| Cstl1_j11        | 0.106172  | 0.0180112 | 0            | 1         | 1         |
| Zfp937_j1        | 0.47042   | 0.458389  | 0            | 1         | 1         |
| Entpd6           | 8.54508   | 7.40834   | -0.205943    | 0.111941  | 0.416333  |

|                  |           |             |               |           |           |
|------------------|-----------|-------------|---------------|-----------|-----------|
| Nsf1c_j6         | 0.566556  | 0.844378    | 0.57567       | 0.0737146 | 0.327189  |
| Fkbp1a_j2        | 0.960291  | 1.44875     | 0.593265      | 0.153018  | 0.48502   |
| Sdcbp2           | 0.0282493 | 0.195993    | 2.79452       | 0.0366937 | 0.211804  |
| Sdcbp2_j1        | 0.674096  | 0.825338    | 0.29203       | 0.376607  | 0.70856   |
| 5430405G05Rik_j1 | 0.0651822 | 0.231585    | 1.82899       | 0.149838  | 0.479601  |
| Rspo4_j1         | 0.133152  | 0.226037    | 0.763485      | 0.129552  | 0.448468  |
| Scrt2            | 3.91573   | 3.57956     | -0.129501     | 0.352562  | 0.689448  |
| Srxn1_j1         | 5.97637   | 14.2431     | 1.25292       | 0         | 0         |
| Csnk2a1_j2       | 1.39232   | 1.1292      | -0.302197     | 0.256862  | 0.60573   |
| 6820408C15Rik_j1 | 2.17032   | 2.1865      | 0.010713      | 0.954578  | 0.986881  |
| 6820408C15Rik_j6 | 0         | 0.0516299   | 1.79769e+308  | 0.22879   | 1         |
| Rem1_j1          | 0.0685848 | 0.0601506   | -0.189308     | 0.898827  | 1         |
| Rem1             | 0.223677  | 0.127194    | -0.814387     | 0.205752  | 0.550218  |
| Tpx2_j7          | 0.326074  | 0.395609    | 0.278874      | 0.515316  | 0.794119  |
| Tpx2_j6          | 0.0386356 | 0.0854802   | 1.14566       | 0.307952  | 1         |
| Ttll9_j2         | 0.11268   | 0.0178643   | 0             | 1         | 1         |
| Ttll9_j3         | 0.40431   | 0.414487    | 0             | 1         | 1         |
| BC020535_j2      | 0         | 0.134217    | 1.79769e+308  | 0.0337724 | 1         |
| BC020535_j3      | 0.0649591 | 0.170929    | 1.3958        | 0.235991  | 0.583321  |
| BC020535_j8      | 0.0647681 | 0.000474786 | -7.09186      | 0.888001  | 1         |
| Kif3b_j1         | 2.4957    | 4.54809     | 0             | 1         | 1         |
| Kif3b_j3         | 1.963     | 3.56615     | 0             | 1         | 1         |
| XLOC_018486      | 0.0729493 | 0.078764    | 0.110642      | 0.949105  | 1         |
| U46068_j1        | 0.289173  | 0           | -1.79769e+308 | 5.29E-06  | 0.0001778 |
| Cbfa2t2_j4       | 1.33594   | 1.5484      | 0             | 1         | 1         |
| Chmp4b_j1        | 4.81175   | 3.54832     | -0.439424     | 0.0549494 | 0.273423  |
| Raly_j2          | 77.7584   | 78.7985     | 0.0191694     | 0.832175  | 0.945814  |
| Itch             | 1.42203   | 0.96298     | 0             | 1         | 1         |
| Dynlrb1          | 34.4274   | 41.5687     | 0.27194       | 0.0206226 | 0.143909  |
| Dynlrb1_j2       | 7.29463   | 0           | -1.79769e+308 | 6.70E-12  | 8.50E-10  |
| Dynlrb1_j3       | 114.147   | 115.163     | 0.0127826     | 0.908088  | 0.971038  |
| XLOC_018498      | 0.0507622 | 0.0288337   | -0.816        | 0.567874  | 1         |
| Trp53inp2_j3     | 12.7998   | 9.14069     | -0.485747     | 2.92E-05  | 0.0007568 |
| Acss2            | 23.0532   | 26.7018     | 0             | 1         | 1         |
| Myh7b_j11        | 1.26774   | 0.750227    | 0             | 1         | 1         |
| Cep250_j7        | 0.339195  | 0.595919    | 0             | 1         | 1         |
| Phf20_j7         | 0.281269  | 0.252267    | 0             | 1         | 1         |
| Phf20_j12        | 2.24983   | 2.33895     | 0             | 1         | 1         |
| Epb4.1l1_j4      | 2.56629   | 2.35602     | 0             | 1         | 1         |
| Epb4.1l1_j9      | 12.6397   | 10.6759     | 0             | 1         | 1         |
| Dlgap4           | 1.91857   | 3.02325     | 0.656067      | 0.0296862 | 0.184452  |
| Rpn2_j6          | 5.84537   | 10.9006     | 0             | 1         | 1         |
| Src_j3           | 0.992539  | 0.750271    | 0             | 1         | 1         |
| Nnat             | 0.221538  | 0.415115    | 0             | 1         | 1         |
| Nnat             | 0.622792  | 1.02423     | 0             | 1         | 1         |
| Ctnnbl1_j2       | 18.7775   | 16.7007     | -0.169097     | 0.375998  | 0.708112  |
| Rprd1b           | 0.629418  | 0.61407     | 0             | 1         | 1         |



|                  |           |          |               |           |           |
|------------------|-----------|----------|---------------|-----------|-----------|
| Actr5_j4         | 0.394695  | 0.550547 | 0.480125      | 0.299683  | 0.646333  |
| Fam83d_j2        | 0.265965  | 0        | -1.79769e+308 | 0.0002276 | 0.0042745 |
| Dhx35_j2         | 1.11909   | 0.603376 | 0             | 1         | 1         |
| XLOC_018534      | 0.246189  | 0.114308 | -1.10684      | 0.420655  | 0.736821  |
| Plcg1_j4         | 0.796979  | 0.796386 | -0.00107348   | 0.994994  | 0.998626  |
| XLOC_018538      | 0.201382  | 0.161974 | -0.314169     | 0.839881  | 0.949215  |
| 9430021M05Rik    | 0.0839771 | 0        | -1.79769e+308 | 0.0180991 | 1         |
| 9430021M05Rik_j6 | 3.20764   | 3.52832  | 0.13747       | 0.497364  | 0.783786  |
| Srsf6_j2         | 12.2623   | 12.6613  | 0             | 1         | 1         |
| Srsf6_j4         | 2.93595   | 2.50163  | 0             | 1         | 1         |
| Srsf6_j6         | 0         | 0.857926 | 0             | 1         | 1         |
| L3mbtl_j13       | 0.565988  | 0.326961 | -0.791652     | 0.0414885 | 0.229503  |
| Ift52            | 0.62806   | 0.62921  | 0.00263876    | 0.992245  | 0.997671  |
| Tox2_j1          | 2.02696   | 2.78005  | 0             | 1         | 1         |
| Tox2_j3          | 4.45647   | 4.84162  | 0             | 1         | 1         |
| Ttpal            | 0.958726  | 1.055    | 0.138052      | 0.463571  | 0.764005  |
| Ywhab_j1         | 0.497082  | 0.376903 | -0.39929      | 0.56023   | 0.821025  |
| Pabpc1l_j4       | 0.283702  | 0.342792 | 0.272959      | 0.754761  | 0.915405  |
| Wfdc2_j1         | 0.0798586 | 0.165617 | 1.05233       | 0.427294  | 0.741741  |
| Snx21_j6         | 4.44218   | 4.68748  | 0             | 1         | 1         |
| Zswim1_j2        | 4.99566   | 5.01603  | 0             | 1         | 1         |
| Zswim1_j1        | 3.25241   | 3.09083  | 0             | 1         | 1         |
| Ctsa             | 0.223455  | 0.17537  | -0.349578     | 0.560936  | 0.821428  |
| Pcif1_j1         | 0.257475  | 0.259795 | 0.0129409     | 0.965118  | 0.990054  |
| Ncoa3_j1         | 0.787676  | 0.782361 | 0             | 1         | 1         |
| 1500012F01Rik_j1 | 7.53132   | 8.16691  | 0             | 1         | 1         |
| 1500012F01Rik    | 11.5875   | 13.2465  | 0             | 1         | 1         |
| AY672066_j1      | 2.3221    | 1.97065  | 0             | 1         | 1         |
| AY672066_j2      | 1.28006   | 1.04534  | 0             | 1         | 1         |
| Slc9a8           | 0.293354  | 0.328592 | 0.163655      | 0.731442  | 0.904975  |
| Slc9a8_j2        | 5.39577   | 4.75452  | -0.182529     | 0.364056  | 0.698263  |
| Rnf114_j1        | 3.49494   | 5.45015  | 0             | 1         | 1         |
| Snai1            | 0.344519  | 0.404355 | 0.231041      | 0.55449   | 0.817566  |
| Gm14321_j1       | 0.34303   | 0.201218 | -0.769577     | 0.264795  | 0.613677  |
| XLOC_018597      | 0.187917  | 0.159555 | 0             | 1         | 1         |
| Tshz2            | 8.72185   | 7.65732  | 0             | 1         | 1         |
| Tshz2_j1         | 9.34839   | 8.32584  | 0             | 1         | 1         |
| Pfdn4_j4         | 7.71768   | 6.76413  | -0.190262     | 0.70697   | 0.893169  |
| BC049717_j3      | 0.0972256 | 0.149894 | 0.624531      | 0.419786  | 1         |
| 2410001C21Rik_j3 | 1.88872   | 2.21711  | 0             | 1         | 1         |
| Rab22A           | 0.681011  | 0.931093 | 0.451248      | 0.0510297 | 0.261833  |
| Vapb             | 12.4082   | 11.3204  | -0.13237      | 0.16467   | 0.500686  |
| Stx16_j1         | 0.153434  | 0        | -1.79769e+308 | 0.0001559 | 0.0031172 |
| Stx16            | 8.66455   | 9.57889  | 0.144734      | 0.218369  | 0.564804  |
| Stx16            | 1.14131   | 1.96542  | 0.784144      | 0.0009945 | 0.0142529 |
| Npepl1_j3        | 1.11174   | 2.09006  | 0             | 1         | 1         |
| Gnas_j1          | 0.350175  | 0.619495 | 0             | 1         | 1         |

|                  |            |           |              |           |           |
|------------------|------------|-----------|--------------|-----------|-----------|
| Gnas_j3          | 1.0333     | 1.19066   | 0            | 1         | 1         |
| Th1l_j1          | 2.11388    | 3.53382   | 0.741339     | 0.0024677 | 0.0295306 |
| Gm14403_j1       | 0.11156    | 0.0996908 | 0            | 1         | 1         |
| Gm14403_j2       | 1.75472    | 1.48797   | 0            | 1         | 1         |
| Phactr3          | 2.26935    | 3.78771   | 0            | 1         | 1         |
| XLOC_018636      | 4.7975     | 5.16574   | 0            | 1         | 1         |
| Osbpl2           | 2.36867    | 2.65985   | 0            | 1         | 1         |
| Rps21_j2         | 76.0096    | 76.8417   | 0.0157089    | 0.905414  | 0.969961  |
| Slco4a1_j3       | 0.212843   | 0.0493877 | -2.10757     | 0.114674  | 0.421286  |
| Col9a3_j1        | 0.472393   | 0.351768  | -0.425363    | 0.382014  | 0.712175  |
| 2310003C23Rik_j1 | 0.336307   | 0.562661  | 0.742489     | 0.044322  | 0.24008   |
| Arfgap1_j2       | 0.14127    | 0.0578881 | -1.28712     | 0.0469469 | 0.24858   |
| Arfgap1_j5       | 1.10414    | 1.02401   | -0.108688    | 0.587767  | 0.835072  |
| Ppdpf_j5         | 3.12797    | 4.09709   | 0            | 1         | 1         |
| Ppdpf            | 2.23759    | 2.71315   | 0            | 1         | 1         |
| Ppdpf_j7         | 3.25044    | 3.62095   | 0            | 1         | 1         |
| Rtel1            | 0.280654   | 0.407166  | 0            | 1         | 1         |
| Rtel1_j2         | 1.00935    | 1.14863   | 0            | 1         | 1         |
| Zgpat_j4         | 0.990966   | 0.978231  | 0            | 1         | 1         |
| Tpd52l2_j3       | 14.4717    | 17.6699   | 0            | 1         | 1         |
| Dnajc5           | 6.59815    | 5.80955   | 0            | 1         | 1         |
| Dnajc5_j2        | 1.81613    | 2.40443   | 0            | 1         | 1         |
| Prpf6_j3         | 0.0498245  | 0         | 0            | 1         | 1         |
| Tcea2_j3         | 6.57716    | 6.64135   | 0            | 1         | 1         |
| Tcea2_j4         | 6.31667    | 5.206     | 0            | 1         | 1         |
| Myt1             | 1.09747    | 0.76371   | -0.523088    | 0.0363612 | 0.210784  |
| Myt1_j16         | 9.20593    | 9.48281   | 0.0427519    | 0.740488  | 0.909073  |
| Pcmdt2_j2        | 9.53726    | 9.14917   | -0.0599331   | 0.616166  | 0.84872   |
| Suv39h2          | 0.369246   | 0.349773  | 0            | 1         | 1         |
| Suv39h2_j1       | 0.915264   | 0.821741  | 0            | 1         | 1         |
| Prpf18           | 1.08034    | 1.1188    | 0            | 1         | 1         |
| Camk1d_j3        | 0.834985   | 0.854939  | 0            | 1         | 1         |
| Sec61a2_j2       | 7.76618    | 7.73189   | -0.00638383  | 0.953501  | 0.98654   |
| Taf3_j1          | 0.00844048 | 0.22283   | 4.72247      | 0.0036664 | 0.0403837 |
| Atp5c1_j1        | 0.404861   | 0.273278  | -0.567055    | 0.472161  | 0.769302  |
| Atp5c1_j5        | 0          | 0.235614  | 1.79769e+308 | 0.0676377 | 0.31119   |
| Fbxo18           | 0.417665   | 0.415675  | 0            | 1         | 1         |
| Fam188a_j6       | 13.677     | 10.4619   | 0            | 1         | 1         |
| Rsu1_j2          | 9.47089    | 12.6282   | 0            | 1         | 1         |
| Cubn_j1          | 0          | 0.0491963 | 1.79769e+308 | 0.174066  | 1         |
| Trdmt1_j7        | 0.290538   | 0.12419   | -1.22618     | 0.334789  | 0.675569  |
| Ptpla_j6         | 0.201137   | 0.224016  | 0.155424     | 0.828024  | 0.944579  |
| Ptpla_j8         | 0.457393   | 0.46202   | 0.014523     | 0.979401  | 0.994006  |
| Nsun6_j6         | 0.399606   | 0.846713  | 1.08329      | 0.0772654 | 0.336407  |
| Nsun6            | 0.57791    | 0.557933  | -0.0507537   | 0.823115  | 0.942983  |
| Nabl_j1          | 0.512952   | 0.47091   | -0.123371    | 0.900385  | 0.968327  |
| Nabl_j1          | 0.579691   | 0.83244   | 0.522063     | 0.0777213 | 0.337517  |

|                  |           |           |               |           |           |
|------------------|-----------|-----------|---------------|-----------|-----------|
| Pip4k2a_j1       | 0.633495  | 0.317201  | 0             | 1         | 1         |
| Arhgap21_j1      | 1.60767   | 1.53065   | 0             | 1         | 1         |
| Mastl_j1         | 0.0964133 | 0.197976  | 0             | 1         | 1         |
| Mastl_j2         | 0.156955  | 0.154145  | 0             | 1         | 1         |
| Pax8_j2          | 0         | 0.0616163 | 1.79769e+308  | 0.115277  | 1         |
| Cacna1b_j7       | 0.871773  | 1.59197   | 0             | 1         | 1         |
| Ehmt1_j1         | 0.317381  | 0.40231   | 0.342092      | 0.379596  | 0.710915  |
| Ehmt1_j2         | 0.146547  | 0.135114  | -0.117189     | 0.841491  | 0.949916  |
| Tubb2c_j3        | 5.90279   | 5.06334   | 0             | 1         | 1         |
| Ndor1_j7         | 0.0986775 | 0.986839  | 0             | 1         | 1         |
| Ndor1_j8         | 0.554418  | 0.665681  | 0             | 1         | 1         |
| Ndor1_j9         | 0.465459  | 0.794534  | 0             | 1         | 1         |
| Ssna1_j1         | 2.30069   | 4.22008   | 0.875201      | 0.0103067 | 0.0874818 |
| Ssna1            | 23.0136   | 27.6292   | 0.263704      | 0.0586579 | 0.284695  |
| Grin1            | 28.9347   | 20.8088   | -0.475605     | 2.51E-07  | 1.21E-05  |
| C8g              | 0.87817   | 0.660457  | -0.411037     | 0.229792  | 0.576876  |
| Traf2_j1         | 0.0819701 | 0         | -1.79769e+308 | 0.0006036 | 1         |
| B230208H17Rik_j2 | 5.28338   | 6.32148   | 0             | 1         | 1         |
| B230208H17Rik_j4 | 3.69447   | 2.25109   | 0             | 1         | 1         |
| Tmem141_j1       | 1.93502   | 2.7203    | 0             | 1         | 1         |
| Ubac1_j1         | 18.5936   | 22.1726   | 0.253976      | 0.157933  | 0.49215   |
| Ubac1_j3         | 0.808709  | 0.489088  | -0.725526     | 0.178084  | 0.517525  |
| Nacc2_j1         | 11.7963   | 7.70751   | 0             | 1         | 1         |
| Nacc2_j2         | 1.39008   | 1.67001   | 0             | 1         | 1         |
| Qsox2            | 0.134248  | 0.120175  | -0.159766     | 0.85371   | 1         |
| Dnlz_j1          | 2.26198   | 4.12782   | 0             | 1         | 1         |
| Sdccag3_j2       | 4.33191   | 6.65714   | 0             | 1         | 1         |
| Inpp5e_j4        | 6.97039   | 5.90093   | 0             | 1         | 1         |
| Sec16a_j7        | 1.34828   | 2.03665   | 0             | 1         | 1         |
| Sec16a           | 3.00577   | 2.77624   | 0             | 1         | 1         |
| Agpat2_j1        | 0.502511  | 0.240416  | -1.06362      | 0.183472  | 0.524089  |
| Snhg7_j1         | 0.195938  | 0.226627  | 0.209922      | 0.888988  | 0.964761  |
| Snhg7_j4         | 0.76794   | 0.898704  | 0.226853      | 0.61785   | 0.849638  |
| Med22            | 0.660226  | 0.824628  | 0.320783      | 0.290752  | 0.638092  |
| Surf1_j4         | 6.21216   | 6.89362   | 0.150167      | 0.365846  | 0.699768  |
| Surf1            | 8.96076   | 5.99577   | -0.579675     | 0.0006329 | 0.0099044 |
| Surf4            | 25.2401   | 28.1007   | 0.154887      | 0.0758921 | 0.332821  |
| Rexo4_j1         | 4.49629   | 5.24376   | 0.221867      | 0.270737  | 0.61996   |
| Slc2a6_j2        | 0.392313  | 0.457395  | 0             | 1         | 1         |
| Slc2a6_j3        | 8.21165   | 7.91677   | 0             | 1         | 1         |
| Sardh            | 0.472214  | 0.630054  | 0.416036      | 0.13829   | 0.462436  |
| VAV2_j4          | 3.71584   | 2.81502   | 0             | 1         | 1         |
| Brd3             | 2.56757   | 2.22177   | 0             | 1         | 1         |
| Gtf3c4           | 0.790407  | 0.576157  | 0             | 1         | 1         |
| Ntng2_j2         | 0.145215  | 0.12095   | 0             | 1         | 1         |
| Zer1_j2          | 2.40135   | 2.70291   | 0             | 1         | 1         |
| Zer1_j1          | 0.730557  | 0.563944  | 0             | 1         | 1         |

|               |             |                        |            |           |           |
|---------------|-------------|------------------------|------------|-----------|-----------|
| Ccbl1_j1      | 0.411433    | 0.363756               | -0.177686  | 0.771375  | 0.922323  |
| Ccbl1_j2      | 0.000323938 | 0.211672               | 9.3519     | 0.813613  | 0.939161  |
| Sh3glb2_j5    | 1.33728     | 0.906723               | 0          | 1         | 1         |
| Sh3glb2       | 18.0609     | 13.738                 | 0          | 1         | 1         |
| Crat_j2       | 5.67222     | 7.52958                | 0          | 1         | 1         |
| Fnbp1_j9      | 0.931779    | 0.93632                | 0          | 1         | 1         |
| Fnbp1_j8      | 0.701088    | 0.434994               | 0          | 1         | 1         |
| Fnbp1         | 9.2054      | 7.132                  | 0          | 1         | 1         |
| AK076583      | 9.60028     | 9.96748                | 0.0541528  | 0.660715  | 0.871339  |
| Uck1_j2       | 0.0892022   | 0.0646482              | -0.464469  | 0.608922  | 1         |
| 2900010J23Rik | 134.772     | 163.977                | 0.282966   | 0.0015546 | 0.0203315 |
| Dnm1_j5       | 0.147884    | 0.165919               | 0          | 1         | 1         |
| Cdk9          | 2.46882     | 1.92166                | -0.361464  | 0.149698  | 0.47931   |
| Stxbp1_j1     | 0           | 11.8834 1.79769e+308   |            | 1.11E-46  | 3.88E-44  |
| Lrsam1_j2     | 33.5674     | 27.1036                | 0          | 1         | 1         |
| Slc2a8_j1     | 0.17405     | 0.318251               | 0          | 1         | 1         |
| Garnl3_j5     | 11.9152     | 15.8259                | 0          | 1         | 1         |
| Pbx3_j4       | 0.0640049   | 0                      | 0          | 1         | 1         |
| Gapvd1_j3     | 1.29204     | 1.54281                | 0          | 1         | 1         |
| Gapvd1_j2     | 3.74761     | 3.13502                | 0          | 1         | 1         |
| Rabepk        | 3.2877      | 3.30914                | 0          | 1         | 1         |
| Fbxw2_j2      | 0.735588    | 1.77171                | 0          | 1         | 1         |
| Psm5_j1       | 6.40452     | 6.23542                | -0.0386022 | 0.833428  | 0.946358  |
| Traf1_j2      | 0.213453    | 0.0837746              | -1.34934   | 0.112277  | 0.416976  |
| Traf1_j4      | 0           | 0.108875 1.79769e+308  |            | 0.0455403 | 1         |
| Rab14_j1      | 6.93572     | 5.54123                | 0          | 1         | 1         |
| Ggta1_j5      | 0.280011    | 0.386794               | 0          | 1         | 1         |
| Ggta1_j6      | 0.0838326   | 0                      | 0          | 1         | 1         |
| XLOC_018851   | 0.0750879   | 0.0629716              | -0.253879  | 0.866481  | 1         |
| Ttll11_j2     | 0.899827    | 1.07617                | 0          | 1         | 1         |
| Pdcl_j1       | 9.0207      | 9.17053                | 0          | 1         | 1         |
| Zbtb6         | 0.265751    | 0.247931               | 0          | 1         | 1         |
| Dennd1a_j4    | 0.594397    | 0.610664               | 0          | 1         | 1         |
| Psm7          | 0.0663873   | 0.256092               | 1.94769    | 0.0040594 | 0.0433603 |
| Psm7_j2       | 65.1835     | 64.6815                | -0.0111538 | 0.918851  | 0.974658  |
| Nr6a1_j8      | 0.149307    | 0.0314917              | -2.24524   | 0.133237  | 0.454201  |
| Gtdc1_j2      | 0.143669    | 0.131491               | -0.127781  | 0.866918  | 0.957889  |
| Zeb2          | 1.80099     | 1.47217                | 0          | 1         | 1         |
| Orc4          | 4.58142     | 3.94951                | 0          | 1         | 1         |
| Orc4_j1       | 1.83066     | 2.30429                | 0          | 1         | 1         |
| Rbm43_j1      | 0.637128    | 1.05497                | 0          | 1         | 1         |
| Rbm43         | 0.321748    | 0.393352               | 0          | 1         | 1         |
| Nmi           | 0.639133    | 0.653159               | 0          | 1         | 1         |
| Neb_j9        | 0           | 0.0614923 1.79769e+308 |            | 0.0266448 | 1         |
| Arl5a_j2      | 17.507      | 17.9767                | 0          | 1         | 1         |
| Stam2_j2      | 6.98672     | 7.37982                | 0.0789709  | 0.494265  | 0.782488  |
| Prpf40a_j2    | 0.0174016   | 0.0630262              | 0          | 1         | 1         |

|                  |           |             |               |           |          |
|------------------|-----------|-------------|---------------|-----------|----------|
| XLOC_018887      | 0.217048  | 0.1749      | -0.311483     | 0.713348  | 0.896209 |
| Nr4a2_j3         | 0         | 0.111531    | 1.79769e+308  | 0.0103831 | 1        |
| AK044432         | 0.237565  | 0.29243     | 0.299772      | 0.544091  | 0.811218 |
| Wdsub1_j1        | 1.34305   | 0.855737    | 0             | 1         | 1        |
| Cd302            | 1.52138   | 1.6571      | 0             | 1         | 1        |
| Pla2r1_j5        | 0.541188  | 0.546687    | 0.0145844     | 0.963199  | 0.989775 |
| Pla2r1_j7        | 0.0176552 | 0.0667092   | 1.9178        | 0.108108  | 1        |
| Rbms1_j1         | 2.54193   | 2.43581     | 0             | 1         | 1        |
| Rbms1_j2         | 16.1487   | 16.9018     | 0             | 1         | 1        |
| Rbms1_j8         | 4.45863   | 6.09894     | 0             | 1         | 1        |
| Slc38a11_j6      | 0.10874   | 0.0150452   | -2.85351      | 0.206143  | 1        |
| Scn3a_j11        | 0.107379  | 0           | -1.79769e+308 | 0.147329  | 1        |
| Ttc21b_j2        | 1.00853   | 1.21251     | 0.265745      | 0.411521  | 0.730729 |
| Scn9a_j2         | 12.7298   | 7.66388     | 0             | 1         | 1        |
| Fastkd1_j1       | 2.54691   | 2.42615     | 0             | 1         | 1        |
| 4930578N16Rik_j4 | 0.23365   | 0.448896    | 0.942036      | 0.0768677 | 0.335214 |
| 4930578N16Rik    | 0.528163  | 0.344091    | -0.61819      | 0.176363  | 0.515042 |
| mKIAA0137_j3     | 0.50915   | 0.0715231   | 0             | 1         | 1        |
| Mettl8_j1        | 0.164824  | 0.000834978 | 0             | 1         | 1        |
| Mettl8_j4        | 0.572264  | 0.337955    | 0             | 1         | 1        |
| AK086439_j2      | 0         | 0.0772701   | 1.79769e+308  | 0.180422  | 1        |
| Sp3_j2           | 0.29566   | 0.190129    | -0.636963     | 0.390796  | 0.717578 |
| Gpr155_j3        | 0.884109  | 0.599315    | 0             | 1         | 1        |
| Chrna1           | 0.14391   | 0.237852    | 0.724899      | 0.128681  | 0.446996 |
| Atf2             | 5.04013   | 4.97454     | 0             | 1         | 1        |
| Atp5g3_j2        | 82.2836   | 49.4836     | -0.733653     | 7.72E-08  | 4.31E-06 |
| Atp5g3_j3        | 0.852675  | 0.898089    | 0.0748627     | 0.912211  | 0.972333 |
| Atp5g3           | 19.7732   | 22.0396     | 0.156555      | 0.201852  | 0.545319 |
| 6720416L17Rik_j1 | 3.7701    | 2.0811      | -0.857257     | 0.0027764 | 0.032374 |
| Pde11a_j3        | 2.43629   | 3.43274     | 0             | 1         | 1        |
| Prkra_j1         | 0.980722  | 0.566747    | 0             | 1         | 1        |
| Prkra_j2         | 3.95813   | 5.54145     | 0             | 1         | 1        |
| Ccdc141_j3       | 0.486693  | 1.69377     | 0             | 1         | 1        |
| Sestd1_j6        | 0.711568  | 0.413696    | 0             | 1         | 1        |
| Zfp385b          | 2.53754   | 2.25936     | 0             | 1         | 1        |
| Zfp385b_j1       | 2.75886   | 1.96231     | 0             | 1         | 1        |
| Cwc22_j11        | 0.610656  | 0.618899    | 0.0193439     | 0.98077   | 0.994152 |
| Pde1a_j1         | 0         | 0.384505    | 0             | 1         | 1        |
| Nckap1_j8        | 2.62705   | 2.13269     | 0             | 1         | 1        |
| Nckap1           | 22.243    | 26.2652     | 0             | 1         | 1        |
| Tfpi_j2          | 0.0556026 | 0.149759    | 1.42942       | 0.310268  | 1        |
| Ctnnd1           | 5.42602   | 4.348       | -0.319542     | 0.0153923 | 0.117147 |
| Serping1         | 3.75614   | 4.0759      | 0             | 1         | 1        |
| Rtn4rl2_j2       | 1.38585   | 3.05408     | 0             | 1         | 1        |
| P2rx3_j1         | 2.53766   | 4.8419      | 0             | 1         | 1        |
| P2rx3_j2         | 6.3244    | 6.22173     | 0             | 1         | 1        |
| Madd_j4          | 32.3388   | 41.3802     | 0             | 1         | 1        |

|                  |           |            |               |           |          |
|------------------|-----------|------------|---------------|-----------|----------|
| Madd_j14         | 0.975894  | 0.419622   | 0             | 1         | 1        |
| Madd_j6          | 1.33903   | 0.821755   | 0             | 1         | 1        |
| Madd_j5          | 4.42874   | 4.71107    | 0             | 1         | 1        |
| Nr1h3_j3         | 0.522269  | 1.12008    | 1.10074       | 0.0759643 | 0.332913 |
| Nr1h3            | 0.149078  | 0.141937   | -0.0708189    | 0.941503  | 0.982178 |
| Nr1h3_j4         | 0.0350038 | 0.129943   | 1.8923        | 0.191564  | 1        |
| Ddb2_j1          | 5.79792   | 5.65964    | 0             | 1         | 1        |
| Zfp408_j2        | 0.312607  | 0.250098   | 0             | 1         | 1        |
| Atg13_j2         | 9.10444   | 8.14288    | 0             | 1         | 1        |
| Atg13_j1         | 3.99538   | 4.48643    | 0             | 1         | 1        |
| Mdk              | 0.330775  | 0.345296   | 0             | 1         | 1        |
| Dgkz_j4          | 85.1595   | 85.6756    | 0             | 1         | 1        |
| Dgkz_j5          | 98.6829   | 90.8884    | 0             | 1         | 1        |
| Creb3l1_j2       | 0.183784  | 0.151851   | -0.275354     | 0.819512  | 0.941524 |
| Mapk8ip1         | 12.0206   | 10.9926    | 0             | 1         | 1        |
| Mapk8ip1_j4      | 0.0883295 | 0.211023   | 0             | 1         | 1        |
| Slc35c1_j2       | 6.06059   | 4.5813     | 0             | 1         | 1        |
| Prdm11_j2        | 0.118817  | 0.215401   | 0.858288      | 0.16967   | 0.506699 |
| Accs             | 0.420232  | 0.234632   | 0             | 1         | 1        |
| Accsl_j3         | 0.234097  | 0.00988815 | -4.56526      | 0.305185  | 0.650262 |
| Alkbh3_j6        | 1.01861   | 1.36992    | 0.427494      | 0.28358   | 0.631938 |
| Ttc17            | 0.188422  | 0.0699268  | 0             | 1         | 1        |
| XLOC_019024      | 0.41945   | 0.391903   | -0.0980038    | 0.837262  | 0.947974 |
| XLOC_019035      | 0.0876883 | 0.100575   | 0.197812      | 0.848853  | 1        |
| Cat_j1           | 28.4777   | 26.7549    | 0             | 1         | 1        |
| Caprin1_j4       | 9.04529   | 8.39669    | 0             | 1         | 1        |
| D430041D05Rik_j1 | 0.278333  | 0.220583   | -0.335488     | 0.352499  | 0.68942  |
| Hipk3            | 0.948737  | 1.26267    | 0             | 1         | 1        |
| Eif3m_j1         | 0.256991  | 0.327696   | 0.350643      | 0.349879  | 0.687507 |
| Eif3m            | 3.24652   | 2.99471    | -0.116475     | 0.557867  | 0.819817 |
| Elp4_j1          | 2.24633   | 2.25371    | 0.00473577    | 0.972065  | 0.991962 |
| XLOC_019054      | 0.0451382 | 0.0510375  | 0.177212      | 0.926706  | 1        |
| AK084494_j8      | 0.0989906 | 0.12035    | 0.281868      | 0.830388  | 1        |
| AK084494_j7      | 0.0872272 | 0.0713792  | -0.289276     | 0.851284  | 1        |
| 2700007P21Rik    | 0.488348  | 0.539367   | 0             | 1         | 1        |
| Tmem85_j4        | 1.57895   | 0          | 0             | 1         | 1        |
| Ryr3_j1          | 0.0357132 | 0.0585774  | 0.713885      | 0.581977  | 1        |
| Ryr3_j19         | 0         | 0.059098   | 1.79769e+308  | 0.0925652 | 1        |
| Ryr3             | 0.158502  | 0.284504   | 0.843943      | 0.0782876 | 0.339176 |
| Scg5_j1          | 27.6059   | 27.7112    | 0             | 1         | 1        |
| Rasgrp1          | 2.24012   | 1.47295    | 0             | 1         | 1        |
| Gpr176_j1        | 1.42094   | 1.48868    | 0             | 1         | 1        |
| A430105I19Rik_j2 | 0.483747  | 0.462747   | 0             | 1         | 1        |
| A430105I19Rik_j3 | 0.381326  | 0.990715   | 0             | 1         | 1        |
| Fam82a2_j2       | 1.17475   | 1.82019    | 0.631739      | 0.0896047 | 0.367183 |
| Exd1             | 0.155726  | 0          | -1.79769e+308 | 2.57E-07  | 1.24E-05 |
| Ndufaf1_j2       | 0.0770312 | 0.172119   | 0             | 1         | 1        |

|                  |           |           |              |           |          |
|------------------|-----------|-----------|--------------|-----------|----------|
| Rpap1            | 0.363384  | 0.432805  | 0            | 1         | 1        |
| Rpap1_j5         | 0.219745  | 0.617486  | 0            | 1         | 1        |
| Spnb5_j7         | 0.135105  | 0.185992  | 0.46116      | 0.432761  | 0.74445  |
| Spnb5_j15        | 0.289838  | 0.269795  | -0.103382    | 0.855374  | 0.954239 |
| Vps39_j2         | 6.73899   | 7.93016   | 0            | 1         | 1        |
| Zfp106_j2        | 0.159512  | 0.050685  | 0            | 1         | 1        |
| Lrrc57           | 4.69521   | 6.2303    | 0            | 1         | 1        |
| Cdan1_j2         | 0.13412   | 0.30221   | 0            | 1         | 1        |
| Ttbk2_j1         | 6.0978    | 6.40251   | 0            | 1         | 1        |
| Tgm5_j2          | 0.0677206 | 0.17097   | 1.33608      | 0.408806  | 0.729001 |
| Trp53bp1_j1      | 2.8598    | 2.69761   | 0            | 1         | 1        |
| Trp53bp1         | 3.66924   | 2.33218   | 0            | 1         | 1        |
| Serinc4_j4       | 0.804056  | 0.854915  | 0.0884848    | 0.754305  | 0.915328 |
| Mfap1a_j2        | 7.788     | 8.01434   | 0.0413303    | 0.814299  | 0.939438 |
| Mfap1a_j3        | 3.16816   | 3.27231   | 0.0466682    | 0.845705  | 0.951231 |
| Spg11_j2         | 3.87292   | 4.15597   | 0.101765     | 0.550002  | 0.815068 |
| Spg11_j5         | 2.51151   | 2.44706   | -0.0375068   | 0.768946  | 0.921317 |
| Duoxa1_j4        | 0         | 0.0637605 | 1.79769e+308 | 0.0765104 | 1        |
| Cep152_j12       | 0.113023  | 0.0297612 | -1.92512     | 0.170171  | 1        |
| Shc4_j5          | 29.1029   | 28.1058   | -0.0502919   | 0.598479  | 0.840825 |
| Gabpb1_j1        | 0.247239  | 0.566981  | 0            | 1         | 1        |
| Usp50_j1         | 0.0790536 | 0.0693901 | -0.188102    | 0.888895  | 1        |
| Trpm7_j1         | 3.42147   | 4.32681   | 0            | 1         | 1        |
| Ncaph_j2         | 0.149648  | 0.111712  | -0.421795    | 1         | 1        |
| Ciao1            | 0         | 0.168725  | 0            | 1         | 1        |
| Kcnip3_j3        | 0.758198  | 0.388501  | 0            | 1         | 1        |
| Kcnip3_j4        | 0         | 0.222157  | 0            | 1         | 1        |
| Anapc1           | 3.75985   | 3.19819   | -0.233423    | 0.0517972 | 0.263999 |
| Anapc1_j6        | 2.06818   | 1.77464   | -0.220835    | 0.145593  | 0.473519 |
| XLOC_019158      | 0.298634  | 0.38383   | 0.362086     | 0.54102   | 0.809122 |
| AI847159         | 0.216825  | 0.122106  | -0.828394    | 0.538234  | 0.807862 |
| AI847159         | 0.0784622 | 0.226693  | 1.53067      | 0.189591  | 0.531397 |
| Idh3b_j2         | 0.453206  | 0.64518   | 0.509536     | 0.0532815 | 0.268698 |
| Idh3b_j6         | 0.32913   | 0.32459   | -0.0200416   | 0.969565  | 0.991454 |
| Ubox5            | 1.7556    | 1.48709   | 0            | 1         | 1        |
| Ubox5_j1         | 1.61304   | 1.3237    | 0            | 1         | 1        |
| Prosapip1_j3     | 0         | 0.059573  | 0            | 1         | 1        |
| Prosapip1        | 5.13207   | 5.66813   | 0            | 1         | 1        |
| Ddrk1_j1         | 13.9482   | 13.803    | -0.0150941   | 0.94841   | 0.985052 |
| Slc4a11_j3       | 0         | 0.287658  | 0            | 1         | 1        |
| Slc4a11_j4       | 0.552706  | 0.292598  | 0            | 1         | 1        |
| 4930402H24Rik_j4 | 1.441     | 2.04799   | 0            | 1         | 1        |
| A730017L22Rik_j3 | 0.381381  | 0.403672  | 0.081952     | 0.829635  | 0.944941 |
| mADAM33-alpha    | 0.103992  | 0.0921672 | -0.174141    | 0.886522  | 1        |
| Adam33_j9        | 0         | 0.212519  | 1.79769e+308 | 0.0224406 | 0.15274  |
| 1700037H04Rik_j1 | 5.49781   | 5.38764   | 0            | 1         | 1        |
| 1700037H04Rik_j4 | 23.6174   | 31.2098   | 0            | 1         | 1        |

|                  |           |                 |            |           |           |
|------------------|-----------|-----------------|------------|-----------|-----------|
| 1700037H04Rik_j5 | 28.8308   | 30.8322         | 0          | 1         | 1         |
| 5730494N06Rik_j1 | 24.1849   | 16.6401         | 0          | 1         | 1         |
| 5730494N06Rik    | 2.18915   | 1.47332         | 0          | 1         | 1         |
| Pcna_j4          | 0.0916259 | 0.426574        | 2.21897    | 0.0338378 | 0.201353  |
| Pcna_j2          | 0.0807521 | 0.166698        | 1.04567    | 0.239045  | 0.586151  |
| Prokr2_j1        | 0.0529093 | 0               | 0          | 1         | 1         |
| Gpcpd1_j1        | 0.868695  | 0.912846        | 0          | 1         | 1         |
| Gpcpd1_j2        | 4.42342   | 2.94207         | 0          | 1         | 1         |
| Trmt6_j1         | 2.02145   | 2.36224         | 0          | 1         | 1         |
| Lrrn4_j1         | 0.264467  | 0.242818        | -0.123216  | 0.812027  | 0.938348  |
| Pak7_j1          | 0.201145  | 0 -1.79769e+308 |            | 2.34E-05  | 0.000629  |
| Mkks_j2          | 0.544716  | 0.632503        | 0          | 1         | 1         |
| Jag1_j4          | 0.0578515 | 0.0600338       | 0          | 1         | 1         |
| Jag1_j5          | 0.739733  | 1.1037          | 0          | 1         | 1         |
| Tasp1            | 1.64619   | 1.92474         | 0          | 1         | 1         |
| Tasp1_j1         | 0.81499   | 1.24533         | 0          | 1         | 1         |
| AK035754_j2      | 0.868833  | 0.602323        | 0          | 1         | 1         |
| AK035754_j1      | 0.746081  | 0.527652        | 0          | 1         | 1         |
| Rrbp1_j1         | 8.83847   | 8.65281         | 0          | 1         | 1         |
| Snx5_j1          | 11.3223   | 11.7803         | 0.0572108  | 0.630625  | 0.85639   |
| Ovol2_j1         | 0.0699006 | 0.134847        | 0.947945   | 0.477689  | 1         |
| 6330439K17Rik    | 2.77671   | 0.139749        | 0          | 1         | 1         |
| 6330439K17Rik_j4 | 2.58639   | 3.32829         | 0          | 1         | 1         |
| Crnk11_j1        | 3.66836   | 3.70857         | 0.0157296  | 0.905841  | 0.970104  |
| Ralgapa2_j1      | 3.37691   | 2.87491         | -0.232186  | 0.150898  | 0.481603  |
| Napb_j1          | 25.4767   | 17.2845         | 0          | 1         | 1         |
| Napb_j2          | 39.5413   | 48.1446         | 0          | 1         | 1         |
| Zfp120           | 0.786765  | 0.000182626     | 0          | 1         | 1         |
| Ninl_j7          | 0.139506  | 0.554996        | 1.99215    | 0.0075032 | 0.0693786 |
| Ninl_j9          | 0.0461935 | 0.0522617       | 0.178062   | 0.925021  | 1         |
| Snph_j5          | 1.07969   | 1.56744         | 0          | 1         | 1         |
| AA387200_j3      | 0.811675  | 0.604591        | -0.424943  | 0.171945  | 0.509034  |
| Pdrg1_j2         | 0         | 3.20663         | 0          | 1         | 1         |
| Plagl2_j1        | 0.174687  | 0.163964        | -0.0913922 | 0.850349  | 0.952392  |
| AK010870         | 0.0571486 | 0.239234        | 2.06563    | 0.0336785 | 0.200659  |
| Necab3_j6        | 6.80574   | 3.1646          | 0          | 1         | 1         |
| Necab3_j2        | 1.11664   | 1.29513         | 0          | 1         | 1         |
| Necab3_j7        | 5.58888   | 4.04148         | 0          | 1         | 1         |
| Necab3_j8        | 7.7771    | 5.84029         | 0          | 1         | 1         |
| Pigu_j1          | 7.61542   | 7.28895         | -0.0632124 | 0.616249  | 0.848764  |
| Trpc4ap_j3       | 6.6709    | 9.89299         | 0          | 1         | 1         |
| Uqcc_j1          | 0.965736  | 0.745757        | 0          | 1         | 1         |
| 6430550D23Rik_j2 | 0.143509  | 0.0543568       | -1.40061   | 0.504808  | 0.787868  |
| Cpne1_j3         | 5.63194   | 8.49007         | 0          | 1         | 1         |
| Rbm39_j1         | 0.0728666 | 0.122204        | 0          | 1         | 1         |
| AK015092_j2      | 0.110357  | 0.251564        | 1.18875    | 0.191302  | 0.533463  |
| AK015092_j5      | 0.103208  | 0.0416051       | -1.31072   | 0.436144  | 1         |



|                  |             |                       |            |           |           |
|------------------|-------------|-----------------------|------------|-----------|-----------|
| AK015092_j8      | 0.21835     | 0.270947              | 0.311368   | 0.622432  | 0.852322  |
| 5430405H02Rik_j1 | 1.98543     | 2.0296                | 0.0317404  | 0.870221  | 0.958714  |
| 9830001H06Rik_j1 | 0.305291    | 0.218274              | 0          | 1         | 1         |
| Samhd1           | 0.0906724   | 0 -1.79769e+308       |            | 0.0014286 | 1         |
| Gm14286_j2       | 0.416242    | 0.526551              | 0.339151   | 0.259926  | 0.608587  |
| Gm14286_j5       | 0.216263    | 0.239638              | 0.148065   | 0.859174  | 0.955489  |
| Gm14286_j4       | 0.280267    | 0.33088               | 0.239505   | 0.721845  | 0.900739  |
| 9430008C03Rik    | 9.43E-05    | 0.167524              | 10.7948    | 0.882398  | 0.962629  |
| Gm826_j1         | 0.170894    | 0.122938              | -0.475169  | 0.569596  | 0.825926  |
| Chd6_j6          | 1.16927     | 1.2435                | 0          | 1         | 1         |
| Jph2_j3          | 0.0271086   | 0.117805              | 2.11958    | 0.120871  | 1         |
| Serinc3_j1       | 121.253     | 112.688               | -0.105685  | 0.23789   | 0.584725  |
| Rims4_j1         | 0           | 0.0566988             | 0          | 1         | 1         |
| Wfdc5_j1         | 0.177685    | 0.121899              | -0.543634  | 0.52598   | 0.800977  |
| XLOC_019330      | 0.0423214   | 0.142413              | 1.75062    | 0.106976  | 1         |
| Wfdc6a           | 0.200692    | 0.0839284             | -1.25775   | 0.358435  | 0.693853  |
| Pltp             | 1.41772     | 1.53582               | 0.115442   | 0.57809   | 0.830224  |
| Zfp335_j2        | 0.799832    | 0.754983              | -0.0832532 | 0.680553  | 0.879921  |
| Zfp335_j6        | 0.820099    | 0.892971              | 0.122816   | 0.623707  | 0.853007  |
| Cdh22_j2         | 0           | 0.157336 1.79769e+308 |            | 0.0013496 | 0.0181825 |
| Slc35c2_j2       | 1.87496     | 1.40887               | 0          | 1         | 1         |
| Zmynd8_j3        | 0.163948    | 0.819461              | 0          | 1         | 1         |
| Zmynd8_j4        | 0.697955    | 1.38674               | 0          | 1         | 1         |
| Zmynd8_j5        | 0.128015    | 0                     | 0          | 1         | 1         |
| Sulf2_j2         | 0.137447    | 0.0426131             | 0          | 1         | 1         |
| Gm14267_j5       | 0.0382447   | 0.0549217             | 0.522117   | 0.779885  | 1         |
| Prex1_j4         | 0.29498     | 0.175201              | -0.751608  | 0.312763  | 0.657266  |
| Prex1_j6         | 0.334929    | 1.08343               | 1.69368    | 1.23E-09  | 1.02E-07  |
| Stau1            | 9.42634     | 8.79077               | 0          | 1         | 1         |
| Gm11470_j1       | 0.996532    | 1.31126               | 0.395962   | 0.37955   | 0.710911  |
| Znfx1_j4         | 5.13579     | 5.03536               | 0          | 1         | 1         |
| Kcnb1_j4         | 3.07848     | 2.68                  | 0          | 1         | 1         |
| B4galt5_j6       | 0.000401626 | 2.5964                | 0          | 1         | 1         |
| Spata2_j1        | 4.0335      | 3.46025               | 0          | 1         | 1         |
| Spata2           | 1.15889     | 1.40249               | 0          | 1         | 1         |
| Fam65c_j2        | 0.60136     | 0.413221              | -0.541316  | 0.229141  | 0.57622   |
| Fam65c_j1        | 0.485658    | 0.325921              | -0.575417  | 0.133182  | 0.454201  |
| Atp9a_j5         | 0           | 0.249821              | 0          | 1         | 1         |
| XLOC_019370      | 0.223372    | 0.11677               | -0.93578   | 0.157308  | 0.491229  |
| Bcas1_j3         | 0.134365    | 0.00108742            | 0          | 1         | 1         |
| Bcas1            | 0.770552    | 1.56922               | 0          | 1         | 1         |
| Bmp7_j1          | 0.209894    | 0.0419999             | -2.3212    | 0.148785  | 0.477613  |
| Ppp4r1l-ps_j3    | 0.0168263   | 0.304141              | 0          | 1         | 1         |
| Ppp4r1l-ps_j13   | 0.560363    | 0.443587              | 0          | 1         | 1         |
| Ppp4r1l-ps_j14   | 0.174775    | 0.17854               | 0          | 1         | 1         |
| Slmo2_j2         | 1.64385     | 3.71533               | 0          | 1         | 1         |
| Gm14325_j1       | 8.84752     | 9.73742               | 0.138266   | 0.157541  | 0.491628  |

|              |             |                 |            |           |          |
|--------------|-------------|-----------------|------------|-----------|----------|
| Gm14326_j2   | 2.62407     | 2.56199         | -0.0345382 | 0.9226    | 0.975904 |
| Psm7_j5      | 1.26113     | 7.30945         | 0          | 1         | 1        |
| Hrh3_j4      | 0.000512023 | 0.142416        | 8.11969    | 0.612313  | 1        |
| Lama5_j6     | 1.07718     | 2.19985         | 1.03014    | 8.96E-08  | 4.87E-06 |
| Cables2_j4   | 8.01045     | 5.47999         | 0          | 1         | 1        |
| AK045814_j7  | 0.514306    | 0.0820009       | -2.64891   | 0.020156  | 0.141606 |
| AK045814_j8  | 0.47281     | 0.0975119       | -2.27761   | 0.0206379 | 0.143975 |
| Tcf15_j1     | 0.092626    | 0.184588        | 0.994822   | 0.276087  | 0.624922 |
| Dido1_j1     | 0.0282028   | 0.131198        | 0          | 1         | 1        |
| Ythdf1_j3    | 0.783418    | 0.786771        | 0.00616159 | 0.989117  | 0.996607 |
| Kcnq2_j9     | 35.0785     | 34.4593         | 0          | 1         | 1        |
| BC006779_j7  | 0.205743    | 0.231954        | 0.17299    | 0.679159  | 0.879478 |
| BC006779_j13 | 0.0363745   | 0.055046        | 0.597709   | 0.71012   | 1        |
| Stmn3_j3     | 0.175626    | 0.345536        | 0          | 1         | 1        |
| Arfrp1       | 1.86169     | 2.41266         | 0.374013   | 0.0642586 | 0.300996 |
| Zbtb46_j4    | 2.12951     | 2.5054          | 0.234522   | 0.158752  | 0.49323  |
| Zbtb46_j5    | 0.759128    | 1.97003         | 1.3758     | 1.51E-07  | 7.70E-06 |
| Uckl1_j1     | 0.754451    | 1.05805         | 0          | 1         | 1        |
| Nmt2         | 0.918003    | 0.381681        | 0          | 1         | 1        |
| Frmd4a_j3    | 0.2452      | 0.0670622       | 0          | 1         | 1        |
| Frmd4a_j6    | 0.102898    | 0               | 0          | 1         | 1        |
| Frmd4a_j3    | 0.21233     | 0               | 0          | 1         | 1        |
| Frmd4a_j6    | 0.350733    | 0               | 0          | 1         | 1        |
| Frmd4a       | 1.4369      | 1.52163         | 0          | 1         | 1        |
| Bend7_j2     | 0.095059    | 0.0120805       | -2.97614   | 0.0871045 | 1        |
| Sephs1_j1    | 0.456785    | 0.259088        | -0.818074  | 0.21915   | 0.565521 |
| XLOC_017869  | 0.224944    | 0.110287        | 0          | 1         | 1        |
| Nudt5_j1     | 1.13929     | 0.979842        | -0.217509  | 0.124039  | 0.438882 |
| Upf2_j2      | 0.0711917   | 0.0378395       | 0          | 1         | 1        |
| Usp6nl_j1    | 0.992127    | 0.236927        | 0          | 1         | 1        |
| Usp6nl_j5    | 2.3936      | 0.787716        | 0          | 1         | 1        |
| Sfmbt2       | 0.0834373   | 0.123334        | 0.563806   | 0.475356  | 1        |
| Prkcq_j3     | 14.8813     | 12.9995         | 0          | 1         | 1        |
| Il15ra_j2    | 0.243578    | 0.246076        | 0.01472    | 0.981843  | 0.994455 |
| Vim_j2       | 0.101135    | 0 -1.79769e+308 | 0.0239922  | 0.0239922 | 1        |
| Stam_j2      | 0.113341    | 0.0538057       | 0          | 1         | 1        |
| Mrc1_j2      | 2.26704     | 4.75555         | 1.06881    | 6.35E-10  | 5.50E-08 |
| Arl5b_j3     | 0.906012    | 1.21305         | 0          | 1         | 1        |
| XLOC_017891  | 0.0871224   | 0.0612294       | 0          | 1         | 1        |
| Gm13318_j1   | 0.238976    | 0.0704038       | -1.76314   | 0.084317  | 0.354323 |
| Bmi1_j3      | 0.45028     | 0.398896        | 0          | 1         | 1        |
| BC061194_j1  | 0.0496588   | 0 -1.79769e+308 | 0.0399644  | 0.0399644 | 1        |
| BC061194_j5  | 0.192442    | 0.129222        | -0.574575  | 0.458438  | 0.761003 |
| BC061194_j7  | 0.0585788   | 0 -1.79769e+308 | 0.0286402  | 0.0286402 | 1        |
| AK076779_j5  | 0.214723    | 0.221352        | 0.0438665  | 0.949019  | 0.985323 |
| Msr2_j2      | 0.214585    | 0.251369        | 0.228258   | 0.797955  | 0.932929 |
| XLOC_017906  | 0.235276    | 0.12487         | -0.913919  | 0.324452  | 0.667503 |

|                  |           |                 |             |           |           |
|------------------|-----------|-----------------|-------------|-----------|-----------|
| Etl4_j4          | 0.333686  | 0.495598        | 0           | 1         | 1         |
| Etl4_j9          | 1.38118   | 1.58759         | 0           | 1         | 1         |
| Thnsl1_j1        | 0.407029  | 0.366074        | -0.152996   | 0.772266  | 0.922699  |
| Yme1l1_j5        | 17.6945   | 15.7103         | 0           | 1         | 1         |
| XLOC_017921      | 0.112045  | 0.0923535       | 0           | 1         | 1         |
| XLOC_017921      | 0.214084  | 0.0156004       | 0           | 1         | 1         |
| Il1f9            | 0.186127  | 0.411974        | 1.14627     | 0.0181922 | 0.131957  |
| Il1f9_j1         | 0.107628  | 0.100955        | -0.0923414  | 0.93996   | 1         |
| Psd4             | 0.202263  | 0.412008        | 1.02644     | 0.0024204 | 0.0291004 |
| Psd4_j4          | 0.37358   | 0.371035        | -0.00986296 | 0.982677  | 0.9947    |
| Zmynd19_j1       | 0.441502  | 0.337507        | 0           | 1         | 1         |
| Wdr85            | 2.14166   | 2.14231         | 0.000440867 | 0.997963  | 0.999228  |
| Pnpla7_j2        | 0.0825646 | 0.0192822       | -2.09825    | 0.116024  | 1         |
| Pnpla7_j9        | 0.783595  | 0.99235         | 0.340741    | 0.27212   | 0.620886  |
| Nelf_j4          | 1.45871   | 1.46378         | 0           | 1         | 1         |
| Nelf             | 7.5498    | 6.02596         | 0           | 1         | 1         |
| Nelf_j3          | 0.469917  | 0.431001        | 0           | 1         | 1         |
| Npdc1            | 5.4588    | 6.54224         | 0.261201    | 0.187402  | 0.528344  |
| Abca2_j11        | 23.909    | 30.177          | 0.335896    | 0.0021899 | 0.0267913 |
| Kcnt1            | 0.202601  | 0.207863        | 0           | 1         | 1         |
| Gpsm1_j5         | 5.10135   | 6.64165         | 0           | 1         | 1         |
| 5930434B04Rik    | 5.34926   | 5.78436         | 0           | 1         | 1         |
| 5930434B04Rik    | 4.62413   | 3.80249         | 0           | 1         | 1         |
| Adamtsl2_j8      | 0.0644709 | 0 -1.79769e+308 | 0.0435805   |           | 1         |
| BC050122         | 0.0870559 | 0 -1.79769e+308 | 0.0014803   |           | 1         |
| Col5a1           | 0.397746  | 0.595282        | 0           | 1         | 1         |
| F730016J06Rik_j3 | 0.104173  | 0.0963079       | -0.113254   | 0.844135  | 1         |
| XLOC_017964      | 0.087468  | 0.0728771       | -0.263291   | 0.813774  | 1         |
| Gm347_j1         | 0.111964  | 0 -1.79769e+308 | 8.14E-06    |           | 1         |
| Gm347_j2         | 0.329169  | 0.393207        | 0.256461    | 0.408256  | 0.728619  |
| Gm347            | 0.20081   | 0.31747         | 0.660789    | 0.0510788 | 0.261892  |
| Gbgt1_j1         | 0.131061  | 0.237336        | 0.856693    | 0.18287   | 0.523288  |
| Ralgds           | 2.40317   | 3.36863         | 0           | 1         | 1         |
| Tsc1             | 1.33559   | 1.23699         | 0           | 1         | 1         |
| Tsc1_j4          | 0.29015   | 0.445974        | 0           | 1         | 1         |
| Ddx31_j2         | 0.0734843 | 0.0614139       | 0           | 1         | 1         |
| Ttf1             | 0.791439  | 0.919082        | 0.215716    | 0.357168  | 0.693052  |
| Setx_j3          | 1.07882   | 1.10679         | 0.0369262   | 0.898953  | 0.967647  |
| Rapgef1_j5       | 2.67623   | 2.84473         | 0           | 1         | 1         |
| Rapgef1_j4       | 0.639208  | 0.820983        | 0           | 1         | 1         |
| Rapgef1_j10      | 0.0908423 | 0               | 0           | 1         | 1         |
| Odf2_j9          | 0.873809  | 0.731682        | -0.256101   | 0.491076  | 0.780237  |
| Spna2_j9         | 92.1712   | 106.678         | 0           | 1         | 1         |
| Spna2_j8         | 7.97437   | 7.09276         | 0           | 1         | 1         |
| Set_j4           | 0.383178  | 0.443817        | 0           | 1         | 1         |
| Pkn3_j1          | 0.208521  | 0.257176        | 0.302564    | 0.386052  | 0.714332  |
| Tbc1d13_j2       | 0.15064   | 0 -1.79769e+308 | 0.0226763   |           | 0.153721  |

|             |           |                 |             |           |           |
|-------------|-----------|-----------------|-------------|-----------|-----------|
| Nup188      | 0.175349  | 0.0964489       | 0           | 1         | 1         |
| Dolpp1      | 3.02944   | 2.87926         | 0           | 1         | 1         |
| Usp20_j2    | 21.2432   | 18.3975         | 0           | 1         | 1         |
| Usp20_j4    | 27.4568   | 13.631          | 0           | 1         | 1         |
| Gpr107_j2   | 6.24384   | 6.37558         | 0.030124    | 0.787233  | 0.92902   |
| Ass1_j5     | 1.59492   | 1.27246         | -0.325868   | 0.452187  | 0.757333  |
| Lamc3       | 0.264812  | 0.50505         | 0.931461    | 0.0002551 | 0.0046935 |
| Nup214_j4   | 0.0940478 | 0 -1.79769e+308 |             | 3.68E-05  | 1         |
| Nup214_j3   | 1.32082   | 1.52558         | 0.207927    | 0.267406  | 0.616277  |
| Ciz1_j1     | 0.217243  | 0.0612528       | 0           | 1         | 1         |
| Ptges2      | 0.246038  | 0.38026         | 0.628104    | 0.264348  | 0.613314  |
| Sh2d3c_j2   | 2.13325   | 1.75612         | 0           | 1         | 1         |
| Sh2d3c_j3   | 0.534255  | 0.61314         | 0           | 1         | 1         |
| Angptl2_j1  | 2.71076   | 3.61502         | 0           | 1         | 1         |
| AK147796    | 0.605319  | 0.610335        | 0.0119061   | 0.958425  | 0.988063  |
| Hspa5_j2    | 56.8448   | 60.6827         | 0           | 1         | 1         |
| Morn5       | 0.523764  | 0.553354        | 0           | 1         | 1         |
| Morn5_j1    | 0.520835  | 0.242979        | 0           | 1         | 1         |
| Arhgap15_j2 | 0.191579  | 0 -1.79769e+308 |             | 0.0010507 | 0.0148592 |
| Mbd5_j2     | 0.516643  | 0.355992        | 0           | 1         | 1         |
| Lypd6b_j3   | 1.05194   | 0.261609        | -2.00756    | 0.0005041 | 0.0081967 |
| Lypd6b_j5   | 0.441153  | 0.246997        | -0.836784   | 0.178388  | 0.517883  |
| AK142467_j1 | 0.269442  | 0.337201        | 0.323636    | 0.561599  | 0.821809  |
| Rif1_j1     | 0.0958606 | 0.104335        | 0.122214    | 0.931298  | 1         |
| Rif1_j7     | 0.0838629 | 3.17E-05        | -11.3714    | 0.898902  | 1         |
| AK079699_j1 | 7.61144   | 6.64979         | 0           | 1         | 1         |
| XLOC_018073 | 0.101369  | 0.0975574       | -0.0552939  | 0.949552  | 1         |
| Fmnl2_j3    | 0.240145  | 0 -1.79769e+308 |             | 1.10E-06  | 4.47E-05  |
| Fmnl2_j6    | 0.693376  | 0.400415        | -0.792141   | 0.137201  | 0.460677  |
| Arl6ip6_j1  | 0.914072  | 0.582645        | -0.649692   | 0.030391  | 0.18734   |
| Galnt13_j1  | 0.83418   | 0.558058        | -0.579944   | 0.0092314 | 0.0807464 |
| Galnt13_j3  | 0.117941  | 0.117322        | -0.00758832 | 0.989193  | 1         |
| Kcnj3_j2    | 0.276901  | 0.125536        | 0           | 1         | 1         |
| Kcnj3_j3    | 0.274335  | 0.0838419       | 0           | 1         | 1         |
| Galnt5_j1   | 0.250175  | 0.129044        | -0.955072   | 0.101248  | 0.394004  |
| Upp2_j1     | 0.308279  | 0.19092         | -0.691267   | 0.183502  | 0.524111  |
| Upp2_j7     | 0.172221  | 0.131213        | -0.392347   | 0.50993   | 0.790883  |
| Upp2_j9     | 0.206572  | 0.0245595       | -3.07229    | 0.0037152 | 0.0407099 |
| Upp2_j8     | 0.164608  | 0.122639        | -0.424621   | 0.434057  | 0.745221  |
| XLOC_018090 | 0.260612  | 0.256093        | 0           | 1         | 1         |
| Tanc1_j2    | 0.0541869 | 0.0168443       | 0           | 1         | 1         |
| AK050909_j2 | 0.0841826 | 0.117959        | 0.486697    | 0.655727  | 1         |
| Tank_j1     | 1.96798   | 1.57618         | -0.320289   | 0.320041  | 0.663346  |
| Psmc14_j2   | 11.8087   | 17.1942         | 0           | 1         | 1         |
| XLOC_018101 | 0.262644  | 3.91E-06        | -16.0338    | 0.997849  | 0.999228  |
| Scn2a1_j1   | 0.5399    | 0.271268        | -0.992975   | 0.180769  | 0.520609  |
| Scn2a1_j6   | 0.0709414 | 0 -1.79769e+308 |             | 5.03E-05  | 1         |

|             |           |                 |            |           |           |
|-------------|-----------|-----------------|------------|-----------|-----------|
| Scn2a1_j10  | 0.709508  | 0.907992        | 0.35586    | 0.15084   | 0.481595  |
| Csrnp3      | 1.49385   | 0.502915        | 0          | 1         | 1         |
| Gm13630_j1  | 0.22056   | 0.0896289       | 0          | 1         | 1         |
| Gm13630_j5  | 0.0809475 | 0.0324756       | 0          | 1         | 1         |
| XLOC_018108 | 0.469853  | 0.394383        | 0          | 1         | 1         |
| XLOC_018112 | 0.150368  | 0.0414647       | 0          | 1         | 1         |
| XLOC_018113 | 0.163443  | 0.114874        | -0.508743  | 0.486462  | 0.777646  |
| Bbs5_j1     | 0.507805  | 1.1661          | 1.19935    | 0.0271674 | 0.174098  |
| Phospho2    | 1.09307   | 1.14659         | 0          | 1         | 1         |
| Klhl23_j3   | 0.156215  | 0 -1.79769e+308 |            | 1.65E-05  | 0.0004734 |
| Ubr3_j3     | 2.09399   | 2.15902         | 0.044128   | 0.796333  | 0.932066  |
| Dcaf17_j4   | 0.0811889 | 0 -1.79769e+308 |            | 1.11E-05  | 1         |
| Metap1d_j4  | 2.47057   | 3.54621         | 0.521434   | 0.056156  | 0.277219  |
| Pdk1_j4     | 2.08549   | 2.26686         | 0          | 1         | 1         |
| Rapgef4_j5  | 0.189701  | 0               | 0          | 1         | 1         |
| Scrn3_j1    | 10.9831   | 10.0738         | 0          | 1         | 1         |
| Hoxd10_j1   | 1.58228   | 0.921468        | -0.779998  | 0.0254424 | 0.166347  |
| Hoxd10      | 1.60753   | 2.14165         | 0.413879   | 0.0758308 | 0.332688  |
| Hoxd8       | 6.40458   | 5.99868         | 0          | 1         | 1         |
| Mtx2_j1     | 13.1618   | 12.9799         | -0.0200797 | 0.919152  | 0.974692  |
| XLOC_018152 | 0.212113  | 0.0296329       | -2.83956   | 0.0449848 | 0.242431  |
| XLOC_018152 | 0.0599842 | 0 -1.79769e+308 |            | 0.0316634 | 1         |
| Ube2e3_j2   | 0.749958  | 0.418908        | 0          | 1         | 1         |
| Ssfa2_j5    | 0.202807  | 0.0754509       | 0          | 1         | 1         |
| XLOC_018169 | 0.200847  | 0.0916564       | -1.13179   | 0.230328  | 0.577332  |
| Nup35_j1    | 0.364865  | 0.316473        | 0          | 1         | 1         |
| Nup35_j4    | 1.00632   | 1.59851         | 0.667638   | 0.169205  | 0.505902  |
| Itgav_j3    | 0.0755099 | 0               | 0          | 1         | 1         |
| Itgav_j2    | 0.07429   | 0.0903923       | 0          | 1         | 1         |
| Ypel4_j3    | 0.819502  | 0.193318        | -2.08377   | 0.0011547 | 0.0160308 |
| Ssrp1       | 18.2112   | 20.0395         | 0          | 1         | 1         |
| Fnbp4_j5    | 1.05193   | 0.707179        | 0          | 1         | 1         |
| Fnbp4_j8    | 2.36213   | 2.31444         | 0          | 1         | 1         |
| Kbtbd4      | 0.0734222 | 0.154858        | 1.07666    | 0.0394885 | 1         |
| Psmc3_j1    | 59.8965   | 73.9695         | 0          | 1         | 1         |
| Arfgap2_j1  | 0.565454  | 0.46731         | -0.275031  | 0.187021  | 0.528005  |
| Lrp4        | 0.241581  | 0.283872        | 0.232735   | 0.453104  | 0.757983  |
| Lrp4_j9     | 0.437744  | 0.712252        | 0.702301   | 0.035807  | 0.208738  |
| Lrp4_j11    | 0.398513  | 0.210291        | -0.922237  | 0.0956974 | 0.38192   |
| Harbi1_j2   | 2.25024   | 2.2726          | 0.0142613  | 0.941416  | 0.982159  |
| Phf21a_j3   | 0.0673866 | 0.0597736       | 0          | 1         | 1         |
| Phf21a_j8   | 0.126316  | 0.0891172       | 0          | 1         | 1         |
| Phf21a_j16  | 0.183845  | 0               | 0          | 1         | 1         |
| Pex16_j1    | 6.11177   | 6.67719         | 0          | 1         | 1         |
| Chst1_j1    | 0.133482  | 0               | 0          | 1         | 1         |
| Lmo2        | 0.655991  | 0.557635        | 0          | 1         | 1         |
| Lmo2_j2     | 3.1016    | 3.10971         | 0          | 1         | 1         |

|                  |           |                 |             |           |           |
|------------------|-----------|-----------------|-------------|-----------|-----------|
| Gm13884          | 0.29633   | 0.358958        | 0.276609    | 0.619218  | 0.850543  |
| AK015665_j2      | 0.199813  | 0.104178        | -0.939601   | 0.162996  | 0.498208  |
| AK019067         | 0.564751  | 0.912532        | 0.69226     | 0.106548  | 0.405473  |
| Wt1_j2           | 0.0284639 | 0.138066        | 2.27816     | 0.0920611 | 1         |
| O610012H03Rik_j1 | 0.103217  | 0 -1.79769e+308 |             | 0.0449789 | 1         |
| Kcna4_j4         | 0.418798  | 0.0156498       | 0           | 1         | 1         |
| Bdnf             | 2.15039   | 2.62213         | 0           | 1         | 1         |
| AK083230_j1      | 0.189501  | 0.156667        | -0.274505   | 0.706473  | 0.892923  |
| AK083230_j6      | 0.0705346 | 0 -1.79769e+308 |             | 0.0249754 | 1         |
| Spred1_j1        | 0.234174  | 0 -1.79769e+308 |             | 3.05E-09  | 2.33E-07  |
| Thbs1_j1         | 0.245185  | 0 -1.79769e+308 |             | 9.37E-13  | 1.35E-10  |
| Eif2ak4_j2       | 1.28514   | 1.49961         | 0           | 1         | 1         |
| Disp2_j4         | 0.117863  | 0.0638847       | 0           | 1         | 1         |
| D2Ert750e_j3     | 0.0968387 | 0.0427041       | -1.18121    | 0.352694  | 1         |
| Zfyve19_j1       | 3.60953   | 2.79592         | 0           | 1         | 1         |
| Spint1           | 0.443361  | 0.21078         | -1.07274    | 0.0456721 | 0.244674  |
| Vps18_j1         | 10.9177   | 11.2832         | 0.0475055   | 0.744189  | 0.910695  |
| Chac1_j1         | 0.383085  | 0.467991        | 0.288817    | 0.601102  | 0.841992  |
| 1700020114Rik_j1 | 0.728639  | 0.453874        | -0.682913   | 0.146846  | 0.475271  |
| Tyro3_j4         | 0.134808  | 0 -1.79769e+308 |             | 0.0454135 | 1         |
| Mga_j3           | 0.125555  | 0.0640132       | -0.971874   | 0.0348722 | 1         |
| Mapkbp1          | 0.5505    | 0.9045          | 0.716377    | 0.0018217 | 0.0232172 |
| Mapkbp1_j11      | 0.576186  | 0.924022        | 0.681393    | 0.0083742 | 0.0750531 |
| Pla2g4b_j10      | 0.339292  | 0.289799        | -0.227477   | 0.607474  | 0.845325  |
| Capn3_j2         | 0.75077   | 0.762874        | 0           | 1         | 1         |
| Tubgcp4          | 5.6579    | 3.89938         | 0           | 1         | 1         |
| Mtap1a_j2        | 145.33    | 137.353         | 0           | 1         | 1         |
| Mtap1a           | 88.0123   | 67.0849         | 0           | 1         | 1         |
| Serf2_j2         | 34.5097   | 42.873          | 0.313069    | 0.0006165 | 0.0097101 |
| 2310003F16Rik_j3 | 5.24387   | 5.10612         | -0.0384028  | 0.726888  | 0.90324   |
| Ctdspl2_j1       | 0.112746  | 0.0498334       | -1.1779     | 0.455502  | 1         |
| Ctdspl2_j8       | 0.871914  | 0.436325        | -0.998784   | 0.0014947 | 0.0196906 |
| Eif3j_j3         | 0.222349  | 0 -1.79769e+308 |             | 2.62E-10  | 2.45E-08  |
| B2m_j1           | 34.0535   | 33.8347         | -0.00929858 | 0.942673  | 0.982647  |
| AA467197         | 0.315208  | 0.150541        | -1.06615    | 0.394479  | 0.719811  |
| Ctxn2_j1         | 0.539173  | 0.0457943       | -3.55751    | 0.101109  | 0.393651  |
| Dtwd1_j4         | 0.672778  | 0 -1.79769e+308 |             | 6.55E-08  | 3.75E-06  |
| Blvra_j4         | 1.03563   | 0               | 0           | 1         | 1         |
| Snrnp200_j3      | 0.0833295 | 0               | 0           | 1         | 1         |
| Mrps5_j2         | 0.209334  | 0 -1.79769e+308 |             | 0.0098263 | 0.0846277 |
| XLOC_018370      | 0.265126  | 0.244411        | -0.117366   | 0.769921  | 0.921534  |
| Mertk_j2         | 0.856328  | 0.745076        | -0.200777   | 0.52959   | 0.80255   |
| Fbln7            | 0.285626  | 0.269339        | -0.084705   | 0.847349  | 0.951744  |
| Zc3h6_j2         | 0.129768  | 0 -1.79769e+308 |             | 4.27E-07  | 1         |
| Slc20a1_j2       | 34.7664   | 36.2291         | 0.059456    | 0.531451  | 0.803508  |
| AK042010_j3      | 0.113783  | 0 -1.79769e+308 |             | 0.0208186 | 1         |
| Nop56_j2         | 0.196451  | 0.137877        | -0.510787   | 0.162626  | 0.498056  |

|                  |            |                 |            |           |           |
|------------------|------------|-----------------|------------|-----------|-----------|
| Nop56_j5         | 21.5801    | 23.266          | 0.108521   | 0.370808  | 0.703864  |
| Ebf3_j4          | 2.99123    | 2.21774         | 0          | 1         | 1         |
| Vps16_j5         | 11.1891    | 12.1102         | 0          | 1         | 1         |
| Ptpra_j4         | 9.16911    | 12.5723         | 0          | 1         | 1         |
| Itpa_j8          | 13.5187    | 15.0208         | 0          | 1         | 1         |
| 2310035K24Rik_j2 | 0.528875   | 0.704232        | 0.413124   | 0.59295   | 0.83794   |
| Mavs_j2          | 0.104965   | 0 -1.79769e+308 |            | 0.0010427 | 1         |
| Mavs_j1          | 0.146843   | 0 -1.79769e+308 |            | 0.0003309 | 0.0057911 |
| Mavs_j6          | 0.928082   | 0.715417        | -0.375468  | 0.312441  | 0.657026  |
| Pank2_j1         | 0.924709   | 0.893216        | -0.0499907 | 0.797639  | 0.932743  |
| XLOC_018401      | 0.102775   | 0.0521244       | -0.979457  | 0.449164  | 1         |
| Cds2_j1          | 0.476189   | 3.78459         | 0          | 1         | 1         |
| Mcm8             | 0.823537   | 0.717246        | 0          | 1         | 1         |
| Plcb4_j6         | 0.147391   | 0               | 0          | 1         | 1         |
| Ankrd5           | 0.240497   | 0.100082        | -1.26483   | 0.0046694 | 0.048196  |
| Ism1_j1          | 0.332481   | 0.229338        | -0.535792  | 0.449954  | 0.755805  |
| 2310003L22Rik_j1 | 0.365976   | 0.565374        | 0.627457   | 0.482874  | 0.77583   |
| 2310003L22Rik_j4 | 0.913369   | 0.890114        | -0.0372063 | 0.896125  | 0.966989  |
| 2310003L22Rik_j3 | 1.18324    | 1.22512         | 0.0501752  | 0.842906  | 0.950302  |
| 2310003L22Rik_j2 | 0.213598   | 0.128757        | -0.730245  | 0.290191  | 0.637573  |
| Macro2_j2        | 5.64252    | 4.49597         | -0.327707  | 0.235007  | 0.582228  |
| Macro2_j8        | 0.922649   | 0.0497916       | -4.21181   | 0.06968   | 0.31665   |
| Pcsk2_j1         | 23.7934    | 21.5379         | 0          | 1         | 1         |
| Pcsk2_j2         | 0.535435   | 0.138785        | 0          | 1         | 1         |
| Dstn_j1          | 0.119994   | 0.043516        | 0          | 1         | 1         |
| LOC668917_j1     | 0.057899   | 0 -1.79769e+308 |            | 0.0464526 | 1         |
| Polr3f           | 1.70064    | 1.51687         | 0          | 1         | 1         |
| Sec23b_j2        | 0.480352   | 0.130783        | 0          | 1         | 1         |
| Dtd1_j3          | 11.1138    | 10.3059         | 0          | 1         | 1         |
| Rin2_j1          | 0.167411   | 0.166165        | -0.0107809 | 0.986525  | 0.996133  |
| Rin2_j2          | 0.273318   | 0.105915        | -1.36767   | 0.0370954 | 0.213277  |
| RP23-125A1.2_j1  | 0.202292   | 0.0452612       | -2.16009   | 0.0851421 | 0.356159  |
| 4930529M08Rik_j2 | 0.130031   | 0.123165        | -0.0782685 | 0.929953  | 1         |
| 4930529M08Rik_j1 | 0.0700775  | 0 -1.79769e+308 |            | 0.0172191 | 1         |
| Plk1s1_j1        | 0.921302   | 1.16421         | 0.337601   | 0.292178  | 0.639     |
| XLOC_018443      | 0.0969131  | 0.107928        | 0.155306   | 0.822829  | 1         |
| Cst1_j5          | 0.07938    | 0               | 0          | 1         | 1         |
| Cst1_j8          | 0.211613   | 0               | 0          | 1         | 1         |
| Cst1_j7          | 0.00578757 | 0.117672        | 0          | 1         | 1         |
| Tmem90b_j2       | 0.325795   | 0 -1.79769e+308 |            | 3.14E-05  | 0.000805  |
| Tmem90b_j3       | 0.534938   | 0.703532        | 0.395246   | 0.367009  | 0.700519  |
| Gm10130_j1       | 0.270526   | 0.0773375       | 0          | 1         | 1         |
| Pygb_j4          | 203.09     | 165.47          | -0.295548  | 0.0008611 | 0.0126848 |
| Nsfl1c_j1        | 1.1929     | 0.550913        | -1.11458   | 9.20E-05  | 0.0019995 |
| Nsfl1c_j2        | 14.1806    | 16.4063         | 0.210328   | 0.164585  | 0.500613  |
| Fkbp1a_j4        | 3.70288    | 4.11333         | 0.15166    | 0.485298  | 0.776978  |
| Gm14165          | 4.28542    | 4.62896         | 0.111251   | 0.543278  | 0.810795  |

|                  |           |           |               |           |           |
|------------------|-----------|-----------|---------------|-----------|-----------|
| Tpx2_j4          | 0.0630355 | 0         | -1.79769e+308 | 0.0036587 | 1         |
| Xkr7_j3          | 1.30751   | 1.0901    | 0             | 1         | 1         |
| Dnmt3b_j2        | 0.15216   | 0.0737243 | -1.04538      | 0.295141  | 0.64172   |
| U46068_j3        | 0.410751  | 0.143237  | -1.51986      | 0.0425717 | 0.233262  |
| Itch_j2          | 5.10369   | 5.1002    | 0             | 1         | 1         |
| Trp53inp2_j2     | 1.26673   | 0.791813  | -0.677875     | 0.0213419 | 0.147284  |
| Acss2_j2         | 1.7605    | 1.32126   | 0             | 1         | 1         |
| Myh7b_j4         | 0.058841  | 0.0145225 | 0             | 1         | 1         |
| Procr_j3         | 0.28432   | 0.143979  | -0.981656     | 0.299176  | 0.646115  |
| Cep250_j2        | 2.93749   | 2.62097   | 0             | 1         | 1         |
| Ergic3_j5        | 0.0229515 | 0.0559299 | 1.28503       | 0.418044  | 1         |
| Ergic3_j2        | 0.0578341 | 0.0248342 | -1.21959      | 0.437462  | 1         |
| Ergic3_j3        | 0.0575873 | 0.0704309 | 0.290458      | 0.80195   | 1         |
| Spag4_j1         | 0.209747  | 0.142484  | -0.557851     | 0.597925  | 0.840519  |
| Phf20_j8         | 0.271382  | 0.250465  | 0             | 1         | 1         |
| Phf20_j11        | 0.197305  | 0.335282  | 0             | 1         | 1         |
| Epb4.1l1_j6      | 12.1008   | 9.93565   | 0             | 1         | 1         |
| 1110008F13Rik_j1 | 29.4573   | 31.7953   | 0.11019       | 0.357477  | 0.693341  |
| Rpn2_j5          | 1.61682   | 5.90587   | 0             | 1         | 1         |
| Src_j4           | 1.25607   | 1.8398    | 0             | 1         | 1         |
| Src_j5           | 1.31136   | 0.524548  | 0             | 1         | 1         |
| Src_j7           | 4.20563   | 5.33212   | 0             | 1         | 1         |
| Rprd1b           | 3.7894    | 3.66981   | 0             | 1         | 1         |
| Ralgapb          | 4.08269   | 3.23411   | -0.336152     | 0.0060061 | 0.0585925 |
| Ralgapb_j5       | 11.2987   | 12.182    | 0.108585      | 0.286719  | 0.635459  |
| Actr5_j3         | 0.458439  | 0.330086  | -0.473889     | 0.30711   | 0.652144  |
| Ppp1r16b_j1      | 0.451792  | 0.804541  | 0.832506      | 0.0004858 | 0.0079551 |
| XLOC_018534      | 0.196373  | 0.128454  | -0.612344     | 0.449014  | 0.755281  |
| Plcg1_j2         | 0.536654  | 0         | -1.79769e+308 | 2.93E-11  | 3.30E-09  |
| Plcg1_j6         | 6.66229   | 7.51097   | 0.172981      | 0.215631  | 0.561479  |
| Lpin3_j3         | 0.0805641 | 0.091539  | 0.18425       | 0.888674  | 1         |
| XLOC_018538      | 0.330892  | 0.125129  | -1.40295      | 0.108488  | 0.409522  |
| 9430021M05Rik_j1 | 2.2127    | 1.69075   | -0.388146     | 0.313684  | 0.658007  |
| 9430021M05Rik_j3 | 0.399969  | 0.471097  | 0.236135      | 0.609973  | 0.846292  |
| Gm14246_j1       | 0.191362  | 0         | -1.79769e+308 | 2.85E-06  | 0.000104  |
| Gm14246          | 0.264219  | 0.121219  | -1.12412      | 0.0163347 | 0.122251  |
| L3mbtl_j5        | 0.387013  | 0.244617  | -0.661857     | 0.172207  | 0.50947   |
| L3mbtl_j12       | 0.163686  | 0.0456467 | -1.84235      | 0.0792191 | 0.341707  |
| XLOC_018552      | 0.0622203 | 0.0590389 | -0.0757207    | 0.944708  | 1         |
| Pkig             | 3.54518   | 4.3996    | 0.311515      | 0.38011   | 0.71114   |
| Ywhab_j2         | 0.220256  | 0         | -1.79769e+308 | 0.010388  | 0.0879576 |
| Rbpjl_j1         | 0.111044  | 0         | -1.79769e+308 | 0.0224926 | 1         |
| Rbpjl_j3         | 0.193708  | 0.0572417 | -1.75875      | 0.240795  | 0.588146  |
| Sys1_j1          | 6.90745   | 8.25581   | 0             | 1         | 1         |
| AK043662_j4      | 0.205224  | 1.65E-05  | -13.6057      | 0.983744  | 0.995196  |
| Wfdc2_j4         | 1.74013   | 1.73296   | -0.00595838   | 0.987647  | 0.996374  |
| Snx21_j4         | 7.98022   | 7.53525   | 0             | 1         | 1         |



|                  |           |                       |             |           |          |
|------------------|-----------|-----------------------|-------------|-----------|----------|
| Snx21_j7         | 15.7491   | 15.1842               | 0           | 1         | 1        |
| Zswim3_j1        | 1.62219   | 1.41107               | 0           | 1         | 1        |
| Pcif1            | 1.15317   | 1.31342               | 0.187719    | 0.209226  | 0.553495 |
| Cd40_j1          | 0.085694  | 0.0383012             | -1.1618     | 0.425084  | 1        |
| Rnf114_j4        | 8.50926   | 7.34745               | 0           | 1         | 1        |
| Rnf114_j5        | 0.571358  | 0                     | 0           | 1         | 1        |
| XLOC_018599      | 0.167023  | 0.0913778             | -0.870128   | 0.53061   | 0.80314  |
| Tshz2_j3         | 16.2549   | 7.39243               | 0           | 1         | 1        |
| Pfdn4_j1         | 0.088897  | 0.0742236             | -0.260256   | 0.926659  | 1        |
| 2410001C21Rik_j2 | 32.443    | 38.7751               | 0           | 1         | 1        |
| Rbm38_j2         | 0.15572   | 0.323058              | 1.05284     | 0.168983  | 0.505754 |
| XLOC_018620      | 0.382531  | 0.331105              | -0.208288   | 0.501218  | 0.785345 |
| Vapb_j2          | 0.0480738 | 0 -1.79769e+308       | 0.0052969   |           | 1        |
| Npepl1_j2        | 0.495782  | 0.392659              | 0           | 1         | 1        |
| Gnas_j5          | 2.82228   | 3.15089               | 0           | 1         | 1        |
| Phactr3_j1       | 0.480491  | 0.722501              | 0           | 1         | 1        |
| 9030418K01Rik_j1 | 3.66997   | 3.96839               | 0           | 1         | 1        |
| Gtpbp5_j7        | 1.23998   | 1.5412                | 0.313736    | 0.431297  | 0.743572 |
| Rps21_j1         | 1.66367   | 1.65898               | -0.00407385 | 0.994406  | 0.998387 |
| Slco4a1_j1       | 0.124476  | 0.0395726             | -1.6533     | 0.152031  | 1        |
| 1600027N09Rik_j7 | 0.574478  | 0.599958              | 0           | 1         | 1        |
| Col20a1_j8       | 0.102384  | 0.075553              | -0.438434   | 0.578789  | 1        |
| Ppdpf_j1         | 6.20896   | 6.96423               | 0           | 1         | 1        |
| XLOC_018659      | 0.246016  | 0.140417              | -0.809034   | 0.123957  | 0.438661 |
| Zgpat_j2         | 0.0823485 | 0                     | 0           | 1         | 1        |
| Zgpat_j8         | 2.53815   | 2.28879               | 0           | 1         | 1        |
| Oprl1            | 1.01333   | 0.360018              | 0           | 1         | 1        |
| Myt1_j3          | 0.550968  | 0.3733                | -0.561634   | 0.0364802 | 0.211122 |
| Myt1_j12         | 0         | 0.158398 1.79769e+308 | 7.32E-06    | 0.0002363 |          |
| Mcm10_j2         | 0.0751826 | 0.027472              | -1.45244    | 0.50768   | 1        |
| Mcm10_j5         | 0.112774  | 0.0146633             | -2.94316    | 0.0849003 | 1        |
| Mcm10_j6         | 0.0486746 | 0 -1.79769e+308       | 0.0362133   |           | 1        |
| Optrn_j3         | 0.54758   | 0.399265              | 0           | 1         | 1        |
| Dhtkd1_j5        | 0.0318385 | 0.114802              | 1.85031     | 0.0271922 | 1        |
| Celf2_j1         | 0.352868  | 0.466531              | 0           | 1         | 1        |
| Celf2_j2         | 0.233939  | 0                     | 0           | 1         | 1        |
| Celf2_j3         | 0.176366  | 0.0274284             | 0           | 1         | 1        |
| Celf2_j4         | 0.828912  | 1.12418               | 0           | 1         | 1        |
| Atp5c1_j4        | 3.97352   | 5.78428               | 0.54172     | 0.0353886 | 0.207291 |
| Itih2_j1         | 0.152457  | 0.0706779             | -1.10907    | 0.163378  | 0.498669 |
| Fbxo18_j5        | 0.967561  | 0.918289              | 0           | 1         | 1        |
| Fam188a_j2       | 6.54069   | 5.21506               | 0           | 1         | 1        |
| Fam188a_j1       | 12.515    | 10.9979               | 0           | 1         | 1        |
| Fam188a_j5       | 2.4949    | 2.77306               | 0           | 1         | 1        |
| Cubn_j3          | 0.0674882 | 0 -1.79769e+308       | 0.0135526   |           | 1        |
| Cubn_j4          | 0.24842   | 0.0410488             | -2.59737    | 0.023145  | 0.155815 |
| Trdmt1_j6        | 0.172133  | 0.0467211             | -1.88138    | 0.193757  | 0.536028 |

|                  |           |                 |           |           |           |
|------------------|-----------|-----------------|-----------|-----------|-----------|
| Trdmt1_j5        | 0.35236   | 0.212184        | -0.731736 | 0.346386  | 0.685483  |
| Ptpla_j3         | 0.118796  | 0.0272111       | -2.12622  | 0.0820866 | 1         |
| Nsun6_j1         | 0.0780754 | 0 -1.79769e+308 |           | 0.0005345 | 1         |
| Nabl_j4          | 14.0091   | 11.3603         | -0.302371 | 0.001286  | 0.0174852 |
| XLOC_018712      | 0.0694418 | 0 -1.79769e+308 |           | 0.0466845 | 1         |
| Enkur_j1         | 0.198178  | 0.132421        | -0.581668 | 0.630423  | 0.856283  |
| Enkur_j2         | 0.103454  | 0.0277439       | -1.89875  | 0.406141  | 1         |
| Abi1_j6          | 1.08074   | 0.769557        | 0         | 1         | 1         |
| Abi1_j10         | 0.558492  | 0.399347        | 0         | 1         | 1         |
| Abi1_j9          | 0.238838  | 0               | 0         | 1         | 1         |
| Abi1_j8          | 1.068     | 0.42611         | 0         | 1         | 1         |
| Spopl_j1         | 3.22422   | 2.39496         | 0         | 1         | 1         |
| Pax8_j1          | 0.0986859 | 0.112024        | 0.182891  | 0.803     | 1         |
| Cacna1b_j5       | 9.28307   | 10.9717         | 0         | 1         | 1         |
| Cacna1b_j6       | 10.1379   | 11.6944         | 0         | 1         | 1         |
| Cacna1b_j17      | 3.20778   | 2.57174         | 0         | 1         | 1         |
| Cacna1b_j19      | 0.398561  | 0               | 0         | 1         | 1         |
| Cacna1b_j18      | 1.28438   | 1.4359          | 0         | 1         | 1         |
| Ehmt1_j3         | 2.17859   | 3.02178         | 0.472007  | 0.0473968 | 0.250038  |
| Ehmt1_j4         | 0.148201  | 0.0228301       | -2.69855  | 0.0312664 | 0.190877  |
| A830007P12Rik_j1 | 0.279262  | 0.146842        | -0.927354 | 0.100109  | 0.391665  |
| Tubb2c_j2        | 266.704   | 283.398         | 0         | 1         | 1         |
| Ndor1_j2         | 0.0863772 | 0               | 0         | 1         | 1         |
| Grin1_j1         | 0.140501  | 0.0719692       | -0.965126 | 0.0064429 | 0.0618508 |
| Grin1_j4         | 0.543583  | 0.257278        | -1.07917  | 0.0237553 | 0.158528  |
| Phpt1_j2         | 1.83983   | 1.71209         | -0.103809 | 0.549194  | 0.814518  |
| Camsap1_j6       | 0.379998  | 0.0871431       | 0         | 1         | 1         |
| Camsap1_j7       | 0.233742  | 0               | 0         | 1         | 1         |
| Ubac1_j5         | 1.51402   | 1.82058         | 0.266017  | 0.38682   | 0.714802  |
| Nacc2_j4         | 3.62249   | 2.06788         | 0         | 1         | 1         |
| Qsox2_j2         | 0.786119  | 0.662133        | -0.247626 | 0.547861  | 0.813899  |
| Card9_j4         | 3.67276   | 2.55432         | 0         | 1         | 1         |
| Inpp5e_j2        | 0.677194  | 0.671564        | 0         | 1         | 1         |
| Sec16a_j2        | 0.264788  | 0.100806        | 0         | 1         | 1         |
| Agpat2           | 0.193104  | 0.2032          | 0.0735244 | 0.93468   | 0.97999   |
| Snhg7_j2         | 0.415708  | 0 -1.79769e+308 |           | 0.0144661 | 0.112052  |
| Sardh_j3         | 0.303212  | 0 -1.79769e+308 |           | 8.04E-07  | 3.44E-05  |
| Gm13373_j7       | 0.223921  | 0.193883        | -0.207802 | 0.811394  | 0.938053  |
| Ntng2_j3         | 9.66354   | 7.16682         | 0         | 1         | 1         |
| Zdhhc12          | 5.8567    | 6.62845         | 0.178582  | 0.228461  | 0.575589  |
| Zer1_j4          | 5.17919   | 6.14916         | 0         | 1         | 1         |
| Zer1_j6          | 5.3336    | 6.03127         | 0         | 1         | 1         |
| Zer1_j5          | 1.34271   | 0.558717        | 0         | 1         | 1         |
| D2Wsu81e_j2      | 0.828019  | 0.866691        | 0         | 1         | 1         |
| D2Wsu81e         | 4.14083   | 3.58228         | 0         | 1         | 1         |
| Ccbl1_j5         | 1.19461   | 1.0024          | -0.253086 | 0.479654  | 0.773715  |
| Ccbl1            | 1.1677    | 0.933979        | -0.322212 | 0.326931  | 0.66996   |

|                  |           |                 |           |           |           |
|------------------|-----------|-----------------|-----------|-----------|-----------|
| 1700001O22Rik_j7 | 0.175328  | 0.0431963       | -2.02108  | 0.504507  | 0.787732  |
| 1700001O22Rik_j8 | 0.281272  | 0.0577244       | -2.28472  | 0.240818  | 0.588146  |
| Fam78a_j1        | 0.126152  | 0.0972316       | -0.375665 | 0.583626  | 1         |
| Dnm1_j12         | 11.2021   | 0.614849        | 0         | 1         | 1         |
| Dnm1_j14         | 0.029347  | 0.0533658       | 0         | 1         | 1         |
| Dnm1_j13         | 7.15072   | 4.69901         | 0         | 1         | 1         |
| Lcn2_j1          | 0.172019  | 0.0869114       | -0.98495  | 0.424736  | 0.740102  |
| Cdk9_j1          | 1.24154   | 1.2743          | 0.0375656 | 0.895759  | 0.96693   |
| Slc2a8_j8        | 1.2558    | 0.967285        | 0         | 1         | 1         |
| Garnl3_j3        | 0.27855   | 0.100737        | 0         | 1         | 1         |
| Garnl3           | 3.12746   | 2.58089         | 0         | 1         | 1         |
| Garnl3_j4        | 0.948162  | 0.899255        | 0         | 1         | 1         |
| Zbtb43           | 0.0825765 | 0.108271        | 0         | 1         | 1         |
| Fam125b_j4       | 0.132647  | 0               | 0         | 1         | 1         |
| Pbx3_j1          | 0.188864  | 0               | 0         | 1         | 1         |
| Pbx3_j3          | 0.252354  | 0.39568         | 0         | 1         | 1         |
| Gapvd1_j7        | 0         | 0.196927        | 0         | 1         | 1         |
| Gapvd1_j6        | 0.432002  | 0               | 0         | 1         | 1         |
| Fbxw2_j1         | 12.9813   | 15.3001         | 0         | 1         | 1         |
| Fbxw2            | 6.63014   | 7.01881         | 0         | 1         | 1         |
| Traf1_j3         | 0.147837  | 6.12E-05        | -11.2383  | 0.949636  | 0.985371  |
| Traf1            | 0.223204  | 0.0595047       | -1.90729  | 0.0973904 | 0.385743  |
| Hc_j2            | 0.170679  | 0.0529061       | -1.68978  | 0.10744   | 0.407525  |
| Ggta1_j8         | 0.45487   | 1.26962         | 0         | 1         | 1         |
| Ttll11_j4        | 0.160493  | 0               | 0         | 1         | 1         |
| Lhx6_j2          | 0.140121  | 0.0766589       | -0.87015  | 0.305595  | 0.650753  |
| Rbm18_j1         | 12.4325   | 11.4898         | 0         | 1         | 1         |
| Zbtb6            | 0.491965  | 0.317835        | 0         | 1         | 1         |
| Strbp_j2         | 1.81054   | 2.29329         | 0         | 1         | 1         |
| Strbp_j4         | 1.5838    | 1.31937         | 0         | 1         | 1         |
| Strbp_j7         | 1.47635   | 1.08802         | 0         | 1         | 1         |
| Dennd1a_j8       | 0.366775  | 0.152289        | 0         | 1         | 1         |
| Nr6a1_j4         | 0.307269  | 0.0605779       | -2.34264  | 0.0011844 | 0.0163815 |
| Golga1_j2        | 0.257477  | 0.094654        | -1.44371  | 0.0034131 | 0.0381544 |
| Scai_j1          | 0.747608  | 0.418079        | 0         | 1         | 1         |
| Lrp1b_j6         | 0.268472  | 0.149033        | -0.849136 | 0.0328178 | 0.197332  |
| Lrp1b_j12        | 0.141003  | 0.0782434       | -0.849684 | 0.435852  | 0.746551  |
| Gtdc1_j1         | 0.996778  | 0.227521        | -2.13128  | 0.0001149 | 0.00242   |
| Zeb2             | 1.37274   | 1.22676         | 0         | 1         | 1         |
| Gm13470          | 0.261795  | 0.313698        | 0.260937  | 0.714922  | 0.896786  |
| Nmi_j2           | 0.999223  | 0.551369        | 0         | 1         | 1         |
| Nmi              | 3.32814   | 3.05208         | 0         | 1         | 1         |
| Neb_j10          | 0.293925  | 0.34156         | 0.216692  | 0.767617  | 0.920744  |
| Neb_j11          | 0.185802  | 0 -1.79769e+308 |           | 0.0004349 | 0.0072372 |
| Neb_j1           | 0.143257  | 0.132168        | -0.116234 | 0.838249  | 0.948409  |
| Prpf40a_j6       | 0.023089  | 0.124613        | 0         | 1         | 1         |
| Prpf40a_j4       | 0.503716  | 0.37415         | 0         | 1         | 1         |

|                  |           |                 |            |           |           |
|------------------|-----------|-----------------|------------|-----------|-----------|
| Nr4a2_j1         | 0.280115  | 0.431846        | 0.6245     | 0.281207  | 0.629634  |
| Nr4a2_j2         | 0.285054  | 0.293399        | 0.0416264  | 0.934535  | 0.979958  |
| Acvr1_j1         | 3.01221   | 6.09081         | 0          | 1         | 1         |
| Ccdc148_j8       | 0.102942  | 0.363431        | 1.81985    | 0.00085   | 0.0125546 |
| Ccdc148_j1       | 0.123598  | 0.0801706       | -0.624511  | 0.434939  | 1         |
| Baz2b_j10        | 2.44182   | 2.51011         | 0.0397928  | 0.86521   | 0.957045  |
| Baz2b_j7         | 0.453549  | 0.126253        | -1.84494   | 8.04E-06  | 0.0002558 |
| Baz2b_j6         | 0.308963  | 0.263838        | -0.227783  | 0.487164  | 0.778145  |
| Ly75             | 0.533107  | 0.144361        | -1.88474   | 3.89E-06  | 0.0001362 |
| Pla2r1_j8        | 0.106793  | 0.147404        | 0.464955   | 0.678     | 1         |
| Rbms1_j3         | 3.8169    | 3.05145         | 0          | 1         | 1         |
| Rbms1_j4         | 1.80797   | 0.77853         | 0          | 1         | 1         |
| Kcnh7_j6         | 1.28118   | 0.978568        | -0.388732  | 0.350102  | 0.687688  |
| Fign             | 0.0647255 | 0.0308513       | -1.069     | 0.361876  | 1         |
| Cobll1_j1        | 0.641108  | 0.548159        | 0          | 1         | 1         |
| Cobll1_j2        | 0.16021   | 0               | 0          | 1         | 1         |
| Cobll1           | 0.184441  | 0               | 0          | 1         | 1         |
| Slc38a11_j2      | 0.759833  | 0.702208        | -0.113783  | 0.687672  | 0.883901  |
| Scn3a_j6         | 0.308336  | 0 -1.79769e+308 |            | 1.96E-11  | 2.27E-09  |
| Scn3a_j7         | 0.0160839 | 0.0600715       | 1.90107    | 0.0628952 | 1         |
| 4930578N16Rik_j6 | 0.0721336 | 0 -1.79769e+308 |            | 0.0268501 | 1         |
| 4930578N16Rik_j5 | 0.0544956 | 0 -1.79769e+308 |            | 0.051181  | 1         |
| 4930578N16Rik_j3 | 0.0897049 | 0.0179502       | -2.32119   | 0.306042  | 1         |
| mKIAA0137_j5     | 0.648104  | 0.56236         | 0          | 1         | 1         |
| Mettl8_j2        | 0.479492  | 0.245529        | 0          | 1         | 1         |
| AK086439_j1      | 0.110361  | 0 -1.79769e+308 |            | 0.0191956 | 1         |
| Ola1_j2          | 9.00639   | 8.74032         | -0.0432625 | 0.792435  | 0.930853  |
| Cir1_j1          | 7.73634   | 7.03216         | -0.137683  | 0.294175  | 0.640979  |
| Gpr155_j1        | 5.36668   | 3.46468         | 0          | 1         | 1         |
| Gpr155_j2        | 0.71372   | 0.291973        | 0          | 1         | 1         |
| Wipf1            | 4.44439   | 4.15964         | 0          | 1         | 1         |
| Atf2_j3          | 3.92623   | 3.04782         | 0          | 1         | 1         |
| Atf2_j4          | 0.0733949 | 0               | 0          | 1         | 1         |
| Nfe2l2_j2        | 6.63015   | 20.3305         | 1.61653    | 0         | 0         |
| Nfe2l2_j3        | 4.24781   | 1.79654         | -1.2415    | 5.04E-07  | 2.27E-05  |
| Sestd1_j3        | 0.114985  | 0.056976        | 0          | 1         | 1         |
| Sestd1           | 1.7394    | 0.516243        | 0          | 1         | 1         |
| Sestd1           | 3.04772   | 3.30154         | 0          | 1         | 1         |
| Cwc22_j1         | 0.183798  | 0.236732        | 0.365132   | 0.648513  | 0.864697  |
| Cwc22_j6         | 0.141731  | 0.0827936       | -0.77556   | 0.605012  | 0.844161  |
| Cwc22_j8         | 0.0975525 | 0.0910254       | -0.0999089 | 0.94944   | 1         |
| Pde1a            | 0.711041  | 2.66257         | 0          | 1         | 1         |
| Frzb_j2          | 1.62747   | 0.000150242     | -13.4031   | 0.817764  | 0.940908  |
| Nckap1_j1        | 0.144521  | 0.109252        | 0          | 1         | 1         |
| Tfpi_j1          | 0.159677  | 0.0746506       | -1.09693   | 0.387657  | 0.715419  |
| Tfpi_j7          | 0.234765  | 0.116832        | -1.00678   | 0.448762  | 0.755217  |
| Ctnnd1_j1        | 17.3661   | 19.639          | 0.177448   | 0.101064  | 0.393603  |

|                   |           |             |               |           |          |
|-------------------|-----------|-------------|---------------|-----------|----------|
| Ctnnd1_j2         | 0.265573  | 0           | -1.79769e+308 | 2.55E-09  | 1.98E-07 |
| Ctnnd1_j3         | 0.184717  | 0.198256    | 0.102052      | 0.831944  | 0.945814 |
| Tmx2_j4           | 30.9449   | 25.9535     | 0             | 1         | 1        |
| Zdhhc5_j2         | 2.44939   | 3.34226     | 0             | 1         | 1        |
| Serping1_j4       | 17.5767   | 19.3236     | 0             | 1         | 1        |
| Rtn4rl2_j1        | 0.524044  | 0           | 0             | 1         | 1        |
| P2rx3_j10         | 73.4419   | 86.1047     | 0             | 1         | 1        |
| Lrrc55_j1         | 0.357438  | 0.189118    | -0.918402     | 0.0280727 | 0.177818 |
| XLOC_018989       | 0.305714  | 0.248637    | -0.298143     | 0.765123  | 0.919657 |
| Ndufs3_j1         | 6.1579    | 4.80643     | -0.357472     | 0.0865915 | 0.359682 |
| Slc39a13_j1       | 1.18204   | 2.14136     | 0             | 1         | 1        |
| Madd_j11          | 0.891137  | 1.69059     | 0             | 1         | 1        |
| Madd_j9           | 2.13758   | 3.33487     | 0             | 1         | 1        |
| Dgkz_j1           | 0.418059  | 0.187501    | 0             | 1         | 1        |
| Dgkz_j3           | 5.36845   | 5.04222     | 0             | 1         | 1        |
| Dgkz_j7           | 0.644664  | 0.509991    | 0             | 1         | 1        |
| Dgkz_j9           | 0.914431  | 0.722058    | 0             | 1         | 1        |
| Creb3l1_j3        | 0.423272  | 0.353932    | -0.258114     | 0.706285  | 0.8928   |
| Mapk8ip1_j1       | 50.3269   | 60.578      | 0             | 1         | 1        |
| Cry2_j1           | 3.20915   | 4.20462     | 0             | 1         | 1        |
| Cry2_j2           | 0.909712  | 0.0361766   | 0             | 1         | 1        |
| Prdm11_j1         | 0.106397  | 0.0516306   | -1.04317      | 0.284423  | 1        |
| Prdm11_j3         | 0.301846  | 7.33E-05    | -12.0073      | 0.936652  | 0.980567 |
| Ext2_j3           | 0.141006  | 0.0857236   | 0             | 1         | 1        |
| Accs_j2           | 0.488292  | 0.42792     | 0             | 1         | 1        |
| Alkbh3_j3         | 2.02189   | 1.59643     | -0.340852     | 0.162106  | 0.497468 |
| Alkbh3            | 11.1999   | 10.9556     | -0.0318164    | 0.835313  | 0.946983 |
| Api5_j1           | 6.85256   | 8.00792     | 0             | 1         | 1        |
| Prr5l_j1          | 0.170462  | 0.0683856   | -1.31768      | 0.289082  | 0.63673  |
| Trim44_j2         | 16.4301   | 13.0662     | 0             | 1         | 1        |
| Cd44_j4           | 12.6473   | 0           | 0             | 1         | 1        |
| Cd44_j5           | 32.2078   | 33.3563     | 0             | 1         | 1        |
| Caprin1_j1        | 0.839945  | 0.042185    | 0             | 1         | 1        |
| Caprin1_j2        | 0.677889  | 0.775284    | 0             | 1         | 1        |
| Caprin1_j5        | 0.609449  | 0.289212    | 0             | 1         | 1        |
| D430041D05Rik_j10 | 0.0664697 | 9.87E-05    | -9.39609      | 0.615628  | 1        |
| D430041D05Rik_j9  | 0.0549096 | 0           | -1.79769e+308 | 1.32E-05  | 1        |
| Qser1_j2          | 1.04619   | 1.01171     | -0.0483425    | 0.846609  | 0.951509 |
| AK084494_j5       | 1.01336   | 0.282384    | -1.84341      | 0.102822  | 0.39727  |
| Tmem85_j3         | 25.9458   | 16.4448     | 0             | 1         | 1        |
| Ryr3_j3           | 0.10764   | 0           | -1.79769e+308 | 1.59E-06  | 1        |
| Ryr3_j14          | 0.100646  | 0.00349365  | -4.84841      | 0.300379  | 1        |
| Arhgap11a         | 0.445521  | 0.0763573   | -2.54466      | 6.72E-05  | 0.001535 |
| Zfp770_j1         | 0.217998  | 0           | -1.79769e+308 | 8.20E-07  | 3.49E-05 |
| Meis2_j1          | 3.23849   | 2.87359     | 0             | 1         | 1        |
| Rasgrp1_j4        | 17.5336   | 13.5066     | 0             | 1         | 1        |
| Rasgrp1_j5        | 0.725202  | 0.000296904 | 0             | 1         | 1        |

|                  |           |                 |           |           |           |
|------------------|-----------|-----------------|-----------|-----------|-----------|
| Rasgrp1_j6       | 5.83602   | 3.19683         | 0         | 1         | 1         |
| Fsip1_j1         | 0.179834  | 0.0958323       | -0.908086 | 0.267476  | 0.616277  |
| Srp14_j2         | 56.4506   | 59.4139         | 0         | 1         | 1         |
| Srp14_j3         | 0.0524783 | 0               | 0         | 1         | 1         |
| A430105I19Rik_j1 | 0.597984  | 0.426819        | 0         | 1         | 1         |
| XLOC_019083      | 0.454088  | 0.110842        | -2.03447  | 0.0294007 | 0.183205  |
| Ino80_j3         | 2.60027   | 3.06396         | 0         | 1         | 1         |
| Ndufaf1_j3       | 2.72046   | 5.55735         | 0         | 1         | 1         |
| Ndufaf1          | 11.17     | 8.32364         | 0         | 1         | 1         |
| Spnb5_j11        | 0.561677  | 0.596285        | 0.0862613 | 0.765552  | 0.919813  |
| Pla2g4e          | 0.224601  | 0.102575        | -1.13069  | 0.0531272 | 0.268218  |
| Tmem87a_j4       | 2.50851   | 3.39991         | 0         | 1         | 1         |
| Zfp106_j3        | 0.900201  | 3.04154         | 0         | 1         | 1         |
| Ttbk2_j3         | 5.26755   | 4.16453         | 0         | 1         | 1         |
| Ttbk2_j4         | 0.102307  | 0               | 0         | 1         | 1         |
| Trp53bp1_j6      | 5.19578   | 5.73849         | 0         | 1         | 1         |
| Trp53bp1_j7      | 0.683885  | 0.493804        | 0         | 1         | 1         |
| Mfap1a_j5        | 1.08927   | 0.290772        | -1.9054   | 2.60E-07  | 1.26E-05  |
| Duoxa1_j7        | 0.100502  | 0.00481615      | -4.38321  | 0.491121  | 1         |
| Slc30a4_j1       | 0.935659  | 0.829237        | -0.174198 | 0.537458  | 0.807604  |
| Fbn1_j1          | 0.173357  | 0.197131        | 0.185406  | 0.641142  | 0.861592  |
| Fbn1_j2          | 0.143704  | 0 -1.79769e+308 |           | 9.14E-11  | 9.41E-09  |
| Cep152_j5        | 0.115987  | 0.0691452       | -0.746263 | 0.26561   | 1         |
| Shc4_j4          | 0.0761686 | 0.0142656       | -2.41666  | 0.0512591 | 1         |
| Secisbp2l_j3     | 1.44109   | 0.97065         | 0         | 1         | 1         |
| Hdc_j4           | 0.123018  | 0 -1.79769e+308 |           | 0.0011627 | 1         |
| Gabpb1_j2        | 0.881618  | 0.83893         | 0         | 1         | 1         |
| Gabpb1_j3        | 0.339356  | 0.317445        | 0         | 1         | 1         |
| Trpm7_j2         | 0.0638867 | 0               | 0         | 1         | 1         |
| Trpm7            | 1.31564   | 1.15808         | 0         | 1         | 1         |
| Kcnip3           | 1.05702   | 1.19117         | 0         | 1         | 1         |
| Nphp1_j4         | 1.14187   | 1.12035         | 0         | 1         | 1         |
| Anapc1_j7        | 5.45064   | 6.83253         | 0.325995  | 0.0082734 | 0.074505  |
| XLOC_019158      | 0.384688  | 0.218988        | -0.812837 | 0.14625   | 0.474508  |
| Ckap2l           | 0.24625   | 0.330494        | 0.424499  | 0.254027  | 0.602331  |
| Idh3b_j1         | 0.85729   | 0.478175        | -0.842245 | 0.0013918 | 0.0186367 |
| Prosapip1        | 0.706767  | 0.943564        | 0         | 1         | 1         |
| Slc4a11_j5       | 0.855627  | 0.726145        | 0         | 1         | 1         |
| 4930402H24Rik_j5 | 0.102635  | 0.0143574       | 0         | 1         | 1         |
| 4930402H24Rik    | 0.165412  | 0               | 0         | 1         | 1         |
| 4930402H24Rik_j6 | 0.917541  | 0.764927        | 0         | 1         | 1         |
| Gfra4_j4         | 1.628     | 1.16034         | -0.488551 | 0.118393  | 0.428427  |
| Adam33_j6        | 0.288649  | 0.398761        | 0.466208  | 0.554057  | 0.817298  |
| Adam33_j11       | 0.0596242 | 0.0124766       | -2.25668  | 0.285224  | 1         |
| Adam33_j10       | 0.0760314 | 0 -1.79769e+308 |           | 0.0118776 | 1         |
| Siglec1_j3       | 0.0667067 | 0.236828        | 1.82793   | 0.0336829 | 0.200659  |
| Siglec1_j4       | 0.0645807 | 0 -1.79769e+308 |           | 0.0059684 | 1         |

|                  |           |                 |            |           |           |
|------------------|-----------|-----------------|------------|-----------|-----------|
| Rassf2_j1        | 0.622579  | 0.275268        | 0          | 1         | 1         |
| Slc23a2_j2       | 0.786764  | 1.04526         | 0          | 1         | 1         |
| Jag1_j2          | 0.559932  | 0.152156        | 0          | 1         | 1         |
| Gm14066_j1       | 0.048005  | 0 -1.79769e+308 | 0.0505878  |           | 1         |
| Gm14066_j2       | 0.0916816 | 0.0273138       | -1.747     | 0.251512  | 1         |
| Gm14066_j9       | 0.292556  | 0.156849        | -0.899336  | 0.365637  | 0.699507  |
| Kif16b_j7        | 0.380944  | 0.347178        | -0.133903  | 0.76382   | 0.91888   |
| Bfsp1_j2         | 0.134454  | 7.88E-05        | -10.7364   | 0.946624  | 1         |
| Bfsp1_j3         | 0.210967  | 0.234216        | 0.150824   | 0.828721  | 0.944654  |
| 6330439K17Rik_j7 | 4.11531   | 2.54654         | 0          | 1         | 1         |
| Cd93_j1          | 0.565122  | 0.585109        | 0.0501418  | 0.860001  | 0.955711  |
| Napb_j3          | 0.134824  | 1.22991         | 0          | 1         | 1         |
| Mzf31            | 0.658695  | 0.569065        | 0          | 1         | 1         |
| ZIPO-III_j1      | 0.915612  | 0.703767        | 0          | 1         | 1         |
| Acss1_j3         | 1.26678   | 1.10523         | -0.196823  | 0.495248  | 0.782763  |
| Ninl_j3          | 0.0526534 | 0 -1.79769e+308 | 0.0024421  |           | 1         |
| Snph_j2          | 1.80572   | 0.609148        | 0          | 1         | 1         |
| Snph_j3          | 0.0740697 | 0.0514254       | 0          | 1         | 1         |
| Rbck1_j2         | 1.00361   | 0.790231        | 0          | 1         | 1         |
| Nrsn2_j1         | 2.18976   | 2.63952         | 0.269505   | 0.302867  | 0.648644  |
| Bcl2l1_j3        | 2.75759   | 3.63076         | 0          | 1         | 1         |
| Pdrg1_j1         | 12.1649   | 12.0646         | 0          | 1         | 1         |
| Pdrg1            | 41.517    | 55.3813         | 0          | 1         | 1         |
| Plagl2_j3        | 0.0528402 | 0 -1.79769e+308 | 0.0042233  |           | 1         |
| AK010870_j3      | 0.0233971 | 0.157835        | 2.75401    | 0.0777506 | 0.337584  |
| XLOC_019266      | 3.01946   | 2.71142         | -0.155244  | 0.764138  | 0.919014  |
| Necab3_j1        | 1.19835   | 0.369433        | 0          | 1         | 1         |
| Pxmp4_j2         | 3.30086   | 2.32991         | -0.502566  | 0.216806  | 0.562926  |
| Eif2s2_j1        | 0.150347  | 0 -1.79769e+308 | 0.0003433  |           | 0.005955  |
| Ahcy_j4          | 2.28581   | 2.20138         | -0.054295  | 0.854153  | 0.953758  |
| Pigu_j2          | 83.6128   | 97.1885         | 0.217061   | 0.0140168 | 0.109582  |
| Edem2_j3         | 0.972657  | 0.83981         | -0.211868  | 0.604826  | 0.8441    |
| Eif6_j1          | 10.6944   | 13.0011         | 0.281772   | 0.0035833 | 0.039682  |
| Uqcc_j8          | 0.145908  | 0.0775342       | 0          | 1         | 1         |
| Rbm12            | 0.652951  | 0.501891        | 0          | 1         | 1         |
| Cpne1            | 4.1652    | 3.08988         | 0          | 1         | 1         |
| Rbm39            | 17.9159   | 18.4056         | 0          | 1         | 1         |
| Gm14230_j2       | 0.0870741 | 0.0855876       | -0.0248407 | 0.972916  | 1         |
| 5430405H02Rik_j2 | 1.34932   | 1.29199         | -0.0626416 | 0.8185    | 0.941118  |
| Dsn1             | 0.0705131 | 0.0546605       | -0.367392  | 0.685935  | 1         |
| 9830001H06Rik_j3 | 0.994454  | 1.07984         | 0          | 1         | 1         |
| Rbl1_j1          | 0.123465  | 0.101629        | -0.280785  | 0.69941   | 1         |
| Rbl1_j2          | 0.188889  | 0.0351312       | -2.42671   | 0.0122305 | 0.0995624 |
| Gm14286_j3       | 0.654588  | 0.509096        | -0.36265   | 0.521561  | 0.79829   |
| Tti1_j1          | 3.30359   | 2.82327         | 0          | 1         | 1         |
| D630003M21Rik_j4 | 0.0477449 | 0 -1.79769e+308 | 0.0829053  |           | 1         |
| D630003M21Rik_j5 | 0.0707596 | 0.145312        | 1.03815    | 0.293189  | 1         |

|                  |           |           |               |           |           |
|------------------|-----------|-----------|---------------|-----------|-----------|
| D630003M21Rik    | 0.254591  | 0.632612  | 1.31314       | 2.18E-05  | 0.0005935 |
| D630003M21Rik_j6 | 0.101044  | 0         | -1.79769e+308 | 0.0002366 | 1         |
| 9430008C03Rik_j3 | 0.125652  | 0.0717896 | -0.807582     | 0.296184  | 1         |
| 9430008C03Rik_j2 | 0.220031  | 0.336782  | 0.614111      | 0.227936  | 0.575019  |
| Chd6_j4          | 0.279097  | 0.0882043 | 0             | 1         | 1         |
| Chd6_j5          | 0.170145  | 0.0807934 | 0             | 1         | 1         |
| Ptprt_j3         | 0.151583  | 0         | 0             | 1         | 1         |
| Ptprt            | 1.411102  | 1.46761   | 0             | 1         | 1         |
| Ada_j4           | 0.130238  | 0         | -1.79769e+308 | 0.0158219 | 1         |
| Matn4_j4         | 3.31269   | 3.12001   | -0.0864515    | 0.647791  | 0.86433   |
| Sdc4_j2          | 1.82236   | 2.06581   | 0.180896      | 0.486593  | 0.777721  |
| Wfdc3            | 0.22985   | 0.315086  | 0.455056      | 0.634428  | 0.858242  |
| Ncoa5_j3         | 0.443756  | 0.835305  | 0.912536      | 0.0114124 | 0.0945238 |
| Slc35c2          | 5.51496   | 6.46687   | 0             | 1         | 1         |
| Elmo2_j2         | 4.50425   | 3.56597   | 0             | 1         | 1         |
| Zfp334_j4        | 1.83957   | 1.25009   | 0             | 1         | 1         |
| Zmynd8_j10       | 0.330151  | 0.25241   | 0             | 1         | 1         |
| Zmynd8_j13       | 0.200168  | 0         | 0             | 1         | 1         |
| Sulf2_j3         | 4.66402   | 2.48851   | 0             | 1         | 1         |
| Prex1_j1         | 0.0842327 | 0         | -1.79769e+308 | 0.0004965 | 1         |
| Znfx1_j2         | 12.2234   | 12.4458   | 0             | 1         | 1         |
| Kcnb1_j3         | 1.57738   | 0.557466  | 0             | 1         | 1         |
| Kcnb1_j1         | 0.13675   | 0.0238261 | 0             | 1         | 1         |
| Tmem189_j1       | 28.5177   | 30.9467   | 0             | 1         | 1         |
| Atp9a_j1         | 74.4149   | 82.736    | 0             | 1         | 1         |
| Atp9a_j6         | 1.18195   | 0         | 0             | 1         | 1         |
| XLOC_019370      | 0.0511872 | 0         | -1.79769e+308 | 0.0425698 | 1         |
| Cbln4            | 0.158755  | 0.173437  | 0.127612      | 0.871238  | 0.959097  |
| Zbp1_j1          | 0.130438  | 0.0782017 | -0.738095     | 0.609486  | 1         |
| Zbp1_j6          | 0.0727629 | 0         | -1.79769e+308 | 0.0643833 | 1         |
| Ppp4r1l-ps_j8    | 0.0453017 | 0.0500454 | 0             | 1         | 1         |
| XLOC_019397      | 0.08751   | 0.0357783 | -1.29036      | 0.235828  | 1         |
| Psm7_j3          | 4.93568   | 5.97705   | 0             | 1         | 1         |
| Hrh3_j6          | 0.118427  | 0         | -1.79769e+308 | 0.0083948 | 1         |
| Hrh3_j8          | 0.161881  | 0.208354  | 0.364098      | 0.61854   | 0.850136  |
| Hrh3_j7          | 0.0409619 | 0.0520538 | 0.34572       | 0.825516  | 1         |
| Lama5_j8         | 0.0636497 | 0.131194  | 1.04347       | 0.0415689 | 1         |
| Lama5_j11        | 0.172781  | 0.0649238 | -1.41212      | 0.156067  | 0.489534  |
| Cables2_j10      | 2.29956   | 2.57389   | 0             | 1         | 1         |
| Cables2_j11      | 0.380566  | 0.300798  | 0             | 1         | 1         |
| Cables2_j12      | 0.252525  | 0         | 0             | 1         | 1         |
| AK045814_j6      | 0.0759892 | 0         | -1.79769e+308 | 0.0101983 | 1         |
| Dido1            | 1.99243   | 1.97863   | 0             | 1         | 1         |
| Kcnq2_j8         | 18.982    | 19.9863   | 0             | 1         | 1         |
| BC006779_j3      | 0.0737414 | 0.021913  | -1.75069      | 0.0391608 | 1         |
| BC006779_j2      | 0.0322673 | 0.0605283 | 0.907535      | 0.177714  | 1         |
| Stmn3_j1         | 491.151   | 540.689   | 0             | 1         | 1         |



|                  |             |           |               |           |           |
|------------------|-------------|-----------|---------------|-----------|-----------|
| Zbtb46_j1        | 0.427922    | 0         | -1.79769e+308 | 4.03E-06  | 0.0001401 |
| Znf512b_j4       | 0.309384    | 0.744469  | 0             | 1         | 1         |
| Znf512b_j5       | 1.06639     | 0.695741  | 0             | 1         | 1         |
| Sox18            | 1.78951     | 2.25747   | 0.335142      | 0.106293  | 0.40481   |
| Nmt2_j1          | 2.09269     | 1.87015   | 0             | 1         | 1         |
| Fam107b_j2       | 12.4079     | 15.5597   | 0             | 1         | 1         |
| Bend7_j4         | 0.000342925 | 0.258541  | 9.55828       | 0.554811  | 0.817792  |
| Sephs1           | 4.34176     | 3.84336   | -0.17591      | 0.291284  | 0.638477  |
| AK140161_j1      | 0.0957486   | 0.181514  | 0.922754      | 0.46933   | 0.767474  |
| Ankrd16_j3       | 0.181052    | 0.1202    | 0             | 1         | 1         |
| Vim_j1           | 0           | 0.113728  | 1.79769e+308  | 0.0602135 | 1         |
| Stam_j1          | 22.0464     | 21.1821   | 0             | 1         | 1         |
| Cacnb2_j2        | 0.0740647   | 0.280643  | 1.92188       | 0.0152389 | 0.116243  |
| Arl5b_j1         | 0.0572277   | 0.155625  | 0             | 1         | 1         |
| Mllt10           | 0.778824    | 0.676132  | -0.203992     | 0.513451  | 0.792725  |
| BC061194_j6      | 0.0689832   | 0.186924  | 1.43813       | 0.105805  | 0.4039    |
| AK076779_j8      | 0           | 0.15028   | 1.79769e+308  | 0.0207235 | 1         |
| AK076779_j7      | 0           | 0.0576407 | 1.79769e+308  | 0.118108  | 1         |
| AK076779_j6      | 0.0511621   | 0.210192  | 2.03856       | 0.0503511 | 0.259471  |
| Msr2_j3          | 0.0264091   | 0.204955  | 2.9562        | 0.340398  | 0.680503  |
| Msr2_j4          | 0.338172    | 0.447968  | 0.405639      | 0.612847  | 0.847359  |
| Etl4_j2          | 1.56436     | 1.98292   | 0             | 1         | 1         |
| Etl4_j5          | 0.516636    | 0.172578  | 0             | 1         | 1         |
| Apbb1ip_j3       | 0           | 0.0901821 | 1.79769e+308  | 0.0561697 | 1         |
| Yme1l1_j1        | 1.25161     | 2.3025    | 0             | 1         | 1         |
| Yme1l1_j6        | 4.76101     | 5.06769   | 0             | 1         | 1         |
| XLOC_017926      | 0.202834    | 0.210017  | 0.0502033     | 0.882089  | 0.962591  |
| Pnpla7_j4        | 0.345888    | 0.573433  | 0.729319      | 0.0209116 | 0.145317  |
| Ang              | 0           | 0.0523712 | 1.79769e+308  | 0.148403  | 1         |
| Fut7             | 0.0487378   | 0.131238  | 1.42907       | 0.150698  | 1         |
| Abca2_j3         | 0.731749    | 3.76779   | 2.3643        | 0         | 0         |
| Abca2_j4         | 0.862098    | 0.169144  | -2.3496       | 3.08E-10  | 2.82E-08  |
| Fbxw5_j5         | 1.8899      | 1.99836   | 0.0805063     | 0.778781  | 0.925532  |
| Fbxw5_j3         | 1.49522     | 1.87301   | 0.325001      | 0.295741  | 0.642495  |
| Fbxw5_j6         | 0.778364    | 0.63406   | -0.295825     | 0.536247  | 0.806648  |
| Edf1_j2          | 40.7729     | 47.3869   | 0.21688       | 0.0528269 | 0.267061  |
| Gpsm1_j3         | 0.152809    | 0.207075  | 0             | 1         | 1         |
| Pmpca            | 3.55496     | 3.51978   | 0             | 1         | 1         |
| Egfl7_j2         | 3.04675     | 3.67187   | 0.269243      | 0.307169  | 0.652174  |
| 5930434B04Rik_j1 | 3.31525     | 2.6012    | 0             | 1         | 1         |
| Rxra_j3          | 0           | 0.286176  | 0             | 1         | 1         |
| Col5a1_j6        | 0.972795    | 1.32539   | 0             | 1         | 1         |
| Olfm1            | 50.3037     | 49.9221   | 0             | 1         | 1         |
| Olfm1_j1         | 32.8236     | 25.4395   | 0             | 1         | 1         |
| XLOC_017966      | 0.110014    | 0.0763219 | -0.527522     | 0.610584  | 1         |
| Gbgt1            | 0.141277    | 0.0445842 | -1.66392      | 0.111289  | 0.415334  |
| Ralgds_j3        | 14.2123     | 17.8263   | 0             | 1         | 1         |

|               |             |           |              |           |           |
|---------------|-------------|-----------|--------------|-----------|-----------|
| Tsc1_j2       | 0.000146534 | 0.124334  | 0            | 1         | 1         |
| Ddx31_j1      | 0.343924    | 0.248884  | 0            | 1         | 1         |
| Ttf1_j3       | 0.0223848   | 0.0483567 | 1.1112       | 0.37575   | 1         |
| Ttf1_j7       | 0.0733454   | 0.130318  | 0.829254     | 0.297139  | 1         |
| Setx_j2       | 0           | 0.0596271 | 1.79769e+308 | 0.0023424 | 1         |
| Med27_j2      | 2.08608     | 2.49722   | 0.259526     | 0.583694  | 0.833136  |
| Rapgef1_j8    | 0.171083    | 0.174678  | 0            | 1         | 1         |
| Rapgef1_j13   | 8.06646     | 10.1709   | 0            | 1         | 1         |
| Slc27a4_j4    | 11.4685     | 10.2701   | 0            | 1         | 1         |
| Urm1_j3       | 1.05699     | 0.967898  | 0            | 1         | 1         |
| Odf2_j5       | 2.11552     | 3.02912   | 0.517889     | 0.00889   | 0.0784217 |
| Spna2_j6      | 9.71598     | 15.8473   | 0            | 1         | 1         |
| Ppp2r4_j3     | 12.4578     | 12.0145   | 0            | 1         | 1         |
| Ppp2r4_j6     | 51.8384     | 49.4766   | 0            | 1         | 1         |
| Tor1b         | 1.04393     | 1.08841   | 0.0601957    | 0.75525   | 0.915526  |
| Tor1b_j1      | 1.0233      | 1.10731   | 0.113831     | 0.615116  | 0.848106  |
| Usp20_j6      | 3.01614     | 18.7272   | 0            | 1         | 1         |
| Gpr107_j3     | 6.01788     | 7.733     | 0.361773     | 0.0149751 | 0.114845  |
| Hmcn2_j1      | 0.0160745   | 0.0817767 | 2.34691      | 0.114554  | 1         |
| Ass1_j4       | 0.894131    | 1.07641   | 0.267668     | 0.631351  | 0.85652   |
| Fubp3_j5      | 2.19158     | 2.88641   | 0            | 1         | 1         |
| Prdm12        | 12.1151     | 11.4047   | 0            | 1         | 1         |
| Lamc3_j4      | 0           | 0.294367  | 1.79769e+308 | 7.34E-06  | 0.0002368 |
| Ciz1_j3       | 7.09629     | 7.27861   | 0            | 1         | 1         |
| Ciz1_j7       | 4.61837     | 4.41498   | 0            | 1         | 1         |
| Fam102a_j3    | 0.240615    | 0.221602  | -0.118755    | 0.803414  | 0.934749  |
| St6galnac6_j5 | 1.6224      | 1.33982   | -0.276091    | 0.441226  | 0.750061  |
| St6galnac6_j6 | 0           | 0.078491  | 1.79769e+308 | 0.175741  | 1         |
| St6galnac6_j7 | 2.1106      | 1.10775   | -0.930028    | 0.0589854 | 0.285529  |
| XLOC_018024   | 0.122898    | 0.0997346 | -0.30129     | 0.820351  | 1         |
| Sh2d3c        | 4.93878     | 4.4886    | 0            | 1         | 1         |
| Mapkap1_j2    | 0           | 0.10068   | 0            | 1         | 1         |
| Dab2ip_j4     | 0.361126    | 1.34106   | 0            | 1         | 1         |
| Mrrf_j2       | 1.64738     | 2.04312   | 0            | 1         | 1         |
| XLOC_018042   | 0.037572    | 0.0934056 | 0            | 1         | 1         |
| Ptgs1_j1      | 0           | 0.140194  | 1.79769e+308 | 0.0064399 | 1         |
| Ptgs1         | 0.341441    | 0.423544  | 0.310877     | 0.402258  | 0.725446  |
| Rabgap1_j4    | 1.12739     | 1.95586   | 0            | 1         | 1         |
| Gm13474_j1    | 0.060542    | 0.191569  | 1.66185      | 0.211826  | 0.556596  |
| Arhgap15      | 0.142402    | 0.322082  | 1.17746      | 0.0426007 | 0.233377  |
| Arhgap15_j1   | 0.174462    | 0.409103  | 1.22955      | 0.0515833 | 0.263342  |
| Arhgap15_j3   | 0.0410458   | 0.201831  | 2.29784      | 0.0881924 | 0.36355   |
| Mbd5_j1       | 0.927892    | 1.02148   | 0            | 1         | 1         |
| Epc2_j2       | 2.37078     | 2.66911   | 0.171        | 0.320743  | 0.663974  |
| Lypd6b_j7     | 0           | 0.371151  | 1.79769e+308 | 0.0006755 | 0.0104296 |
| Lypd6_j2      | 4.68E-05    | 0.322488  | 0            | 1         | 1         |
| AK045825_j2   | 0.0413301   | 0.170396  | 2.04363      | 0.273168  | 0.622221  |

|             |            |           |              |           |           |
|-------------|------------|-----------|--------------|-----------|-----------|
| Rif1_j6     | 0.189787   | 0.242329  | 0.352589     | 0.317705  | 0.66098   |
| XLOC_018073 | 0.0788927  | 0.13401   | 0.764374     | 0.552445  | 1         |
| Fmnl2_j4    | 0.10337    | 0.460138  | 2.15426      | 0.0004263 | 0.0071279 |
| Galnt13_j5  | 0          | 0.0693845 | 1.79769e+308 | 0.0065283 | 1         |
| Kcnj3_j9    | 2.10756    | 2.13695   | 0            | 1         | 1         |
| Gpd2_j2     | 0          | 0.290352  | 0            | 1         | 1         |
| Upp2_j2     | 0.309893   | 0.260774  | -0.248967    | 0.677591  | 0.878807  |
| Upp2_j4     | 0.31481    | 0.332757  | 0.0799856    | 0.766052  | 0.920177  |
| Upp2_j11    | 0.216717   | 0.366011  | 0.756074     | 0.0495796 | 0.256996  |
| Pkp4_j4     | 1.00976    | 1.15591   | 0.195008     | 0.416464  | 0.733896  |
| XLOC_018092 | 0.0352976  | 0.084862  | 0            | 1         | 1         |
| Tank_j2     | 1.01633    | 1.2607    | 0.310845     | 0.38415   | 0.71322   |
| Gca_j3      | 1.48973    | 0.287715  | 0            | 1         | 1         |
| XLOC_018100 | 0.0910167  | 0.0748367 | -0.282385    | 0.782425  | 1         |
| XLOC_018101 | 0.0534426  | 0.0939248 | 0.813517     | 0.573027  | 1         |
| Scn2a1_j2   | 0.395129   | 0.466958  | 0.240968     | 0.315777  | 0.659788  |
| Scn2a1_j8   | 0.158731   | 0.257505  | 0.698019     | 0.0657099 | 0.305649  |
| Csrnp3_j1   | 0          | 0.0475079 | 0            | 1         | 1         |
| Gm13630_j2  | 0          | 0.14259   | 0            | 1         | 1         |
| Nostrin_j3  | 0          | 0.355359  | 1.79769e+308 | 0.0160981 | 0.120889  |
| Klhl23_j1   | 0.0167573  | 0.617917  | 5.20455      | 6.87E-06  | 0.0002239 |
| Ssb_j3      | 17.6623    | 19.2457   | 0            | 1         | 1         |
| Gad1_j1     | 0.00193251 | 0.140404  | 6.18297      | 0.273224  | 1         |
| Dcaf17_j2   | 0.151474   | 0.0702102 | -1.10932     | 0.297052  | 0.64365   |
| Dync1i2_j5  | 8.04478    | 12.465    | 0            | 1         | 1         |
| Metap1d_j1  | 2.20351    | 2.05704   | -0.0992316   | 0.774294  | 0.923546  |
| Metap1d_j2  | 0          | 0.232761  | 1.79769e+308 | 0.0556521 | 0.275793  |
| Pdk1_j1     | 1.90355    | 1.25157   | 0            | 1         | 1         |
| Gm13705_j1  | 0.29271    | 0.321105  | 0.133577     | 0.897273  | 0.967349  |
| Hoxd8       | 4.18965    | 5.09733   | 0            | 1         | 1         |
| Mtx2_j2     | 0.0675124  | 0.154747  | 1.19668      | 0.565113  | 1         |
| Agps_j1     | 0.0804041  | 0.124318  | 0            | 1         | 1         |
| Ube2e3_j6   | 1.53034    | 1.75287   | 0            | 1         | 1         |
| Itga4       | 0.16523    | 0.131261  | -0.332029    | 0.680917  | 0.880014  |
| Itga4_j2    | 0          | 0.0899213 | 1.79769e+308 | 0.0005148 | 1         |
| XLOC_018166 | 0.602391   | 0.681918  | 0.178899     | 0.636098  | 0.858939  |
| Ssfa2_j2    | 0.0875601  | 0.0891218 | 0            | 1         | 1         |
| Ppp1r1c_j3  | 3.18844    | 1.64883   | -0.95141     | 0.0081234 | 0.0734541 |
| Fam171b_j2  | 2.06929    | 0.226666  | 0            | 1         | 1         |
| Fam171b_j3  | 0.0416181  | 0.557684  | 0            | 1         | 1         |
| Slc43a1_j1  | 0.122954   | 0.119338  | -0.0430715   | 0.959846  | 1         |
| Slc43a3_j4  | 0.0494272  | 0.0683193 | 0.466988     | 0.768956  | 1         |
| Tnks1bp1_j5 | 0.17924    | 1.06738   | 2.57411      | 1.17E-12  | 1.65E-10  |
| Tnks1bp1_j8 | 0.193938   | 0.208606  | 0.10518      | 0.918702  | 0.974658  |
| Fnbp4_j3    | 0.594967   | 0.684636  | 0            | 1         | 1         |
| Fnbp4_j4    | 0.611844   | 0.590217  | 0            | 1         | 1         |
| Mtch2_j1    | 17.6246    | 17.1252   | 0            | 1         | 1         |

|                  |             |           |              |           |           |
|------------------|-------------|-----------|--------------|-----------|-----------|
| Sfp1             | 0.0894996   | 0.237834  | 1.41         | 0.069768  | 0.316921  |
| Pacsin3_j3       | 0           | 0.35137   | 0            | 1         | 1         |
| Ckap5_j5         | 0           | 0.0780324 | 1.79769e+308 | 0.005664  | 1         |
| Ambra1_j5        | 0           | 0.0832048 | 0            | 1         | 1         |
| Phf21a_j2        | 0.24981     | 0.881752  | 0            | 1         | 1         |
| Phf21a_j11       | 0.269823    | 0.431145  | 0            | 1         | 1         |
| Phf21a_j10       | 0.135139    | 0.288847  | 0            | 1         | 1         |
| Chst1_j2         | 1.77639     | 2.87125   | 0            | 1         | 1         |
| XLOC_018225      | 0.0655907   | 0.112561  | 0.779139     | 0.598143  | 1         |
| XLOC_018226      | 0.00610153  | 0.203845  | 5.06216      | 0.360363  | 0.695396  |
| Commd9_j1        | 0.620809    | 1.20288   | 0.954269     | 0.115104  | 0.422038  |
| Fba              | 2.079       | 2.38323   | 0.197025     | 0.495677  | 0.782921  |
| Cd59a_j3         | 0.649359    | 0.733914  | 0            | 1         | 1         |
| Kcna4_j3         | 0.466928    | 0.489423  | 0            | 1         | 1         |
| Lin7c_j1         | 5.51635     | 5.74985   | 0.0598108    | 0.740842  | 0.909129  |
| Ccdc34_j2        | 0           | 0.261917  | 1.79769e+308 | 0.0009499 | 0.0137229 |
| Lpcat4_j2        | 0           | 0.125983  | 1.79769e+308 | 0.106018  | 1         |
| Slc12a6_j6       | 0.000150251 | 0.847805  | 12.4621      | 0.812997  | 0.938881  |
| XLOC_018282      | 0.123991    | 0.1351    | 0.123802     | 0.903646  | 1         |
| Thbs1            | 2.96E-05    | 0.173104  | 12.5141      | 0.910092  | 0.971581  |
| Thbs1_j2         | 0           | 0.0915745 | 1.79769e+308 | 0.0022949 | 1         |
| Disp2_j7         | 4.15732     | 4.55309   | 0            | 1         | 1         |
| XLOC_018295      | 0.285214    | 0.156094  | -0.869627    | 0.0888239 | 0.365257  |
| Rad51_j1         | 0.29838     | 0.365277  | 0.291842     | 0.512012  | 0.79188   |
| Gm14138          | 0.470746    | 0.516801  | 0.134661     | 0.752087  | 0.9143    |
| Zfyve19_j2       | 3.25341     | 3.97392   | 0            | 1         | 1         |
| Spint1           | 0           | 0.0972514 | 1.79769e+308 | 0.0246882 | 1         |
| Dll4_j1          | 0.499562    | 0.502267  | 0.00779183   | 0.983608  | 0.995188  |
| 1500003O03Rik_j3 | 122.178     | 111.723   | 0            | 1         | 1         |
| 1700020I14Rik    | 18.5041     | 13.5839   | -0.445947    | 8.28E-07  | 3.52E-05  |
| Rtf1_j1          | 0.549817    | 0.949554  | 0.7883       | 0.0487245 | 0.254316  |
| Mga_j1           | 0.0398838   | 0.149044  | 1.90186      | 7.20E-05  | 1         |
| Mga_j6           | 0.100841    | 0.167329  | 0.730604     | 0.0690862 | 0.315156  |
| Pla2g4b_j4       | 0.124566    | 0.144095  | 0.210117     | 0.752231  | 1         |
| Pla2g4b_j8       | 0.314598    | 0.375006  | 0.253407     | 0.479274  | 0.773547  |
| Pla2g4b_j11      | 0.183074    | 0.295595  | 0.691192     | 0.2037    | 0.547888  |
| Ganc             | 0.333978    | 0.229041  | 0            | 1         | 1         |
| mKIAA1300_j2     | 0.133433    | 0.229043  | 0            | 1         | 1         |
| mKIAA1300_j6     | 0.028601    | 0.0960387 | 0            | 1         | 1         |
| Ctdspl2_j4       | 0           | 0.112405  | 1.79769e+308 | 0.002137  | 1         |
| Ctdspl2_j5       | 0.0565511   | 0.194228  | 1.78012      | 0.0076555 | 0.0704465 |
| Ctdspl2_j6       | 0.149002    | 0.172315  | 0.209717     | 0.696617  | 0.88816   |
| Eif3j_j5         | 2.5691      | 2.15139   | -0.255995    | 0.0965789 | 0.383897  |
| Sord_j2          | 0.13861     | 0.0529779 | -1.38757     | 0.269708  | 0.618771  |
| Sema6d           | 3.30008     | 2.93162   | 0            | 1         | 1         |
| Slc24a5_j1       | 0.287713    | 0.249945  | -0.20302     | 0.568822  | 0.825693  |
| Fgf7_j2          | 0           | 0.0502866 | 1.79769e+308 | 0.105691  | 1         |

|                  |             |           |              |           |           |
|------------------|-------------|-----------|--------------|-----------|-----------|
| Dtwd1_j2         | 0.111758    | 0.235586  | 1.07588      | 0.264428  | 0.613354  |
| Usp8_j1          | 13.7227     | 14.0042   | 0            | 1         | 1         |
| Ap4e1_j1         | 0.573975    | 0.944241  | 0            | 1         | 1         |
| Blvra_j1         | 4.71817     | 4.43274   | 0            | 1         | 1         |
| Tmem127_j1       | 16.084      | 13.4409   | 0            | 1         | 1         |
| Stard7_j1        | 21.0955     | 21.0281   | -0.00461285  | 0.964608  | 0.989999  |
| Dusp2            | 7.20E-06    | 0.05736   | 12.9607      | 0.996079  | 1         |
| Dusp2_j1         | 0           | 0.17706   | 1.79769e+308 | 0.0325454 | 0.196107  |
| Bcl2l11_j1       | 0.479739    | 0.526184  | 0.133318     | 0.663049  | 0.872404  |
| Fbln7_j4         | 0           | 0.0631858 | 1.79769e+308 | 0.0653345 | 1         |
| Zc3h6_j1         | 0           | 0.40435   | 1.79769e+308 | 6.36E-10  | 5.50E-08  |
| Slc20a1_j4       | 0.443155    | 0.650683  | 0.554145     | 0.237385  | 0.584096  |
| AK042010_j1      | 0.155706    | 0.280537  | 0.849366     | 0.25796   | 0.606629  |
| Sirpa_j1         | 0.288075    | 0.369155  | 0.357781     | 0.398489  | 0.722606  |
| Sirpa_j4         | 12.6504     | 13.9131   | 0.137267     | 0.218151  | 0.56451   |
| Stk35_j2         | 0.1406      | 0.170642  | 0.279371     | 0.51568   | 0.794419  |
| Ebf3_j5          | 1.00145     | 1.13957   | 0            | 1         | 1         |
| ltpa_j7          | 0           | 0.735078  | 0            | 1         | 1         |
| Cdc25b_j4        | 0.998227    | 0.933958  | -0.0960097   | 0.807877  | 0.936731  |
| Plcb1_j1         | 0.91901     | 1.20956   | 0            | 1         | 1         |
| Plcb4_j2         | 0.234242    | 0.119334  | 0            | 1         | 1         |
| 6330527O06Rik    | 0.206814    | 0.211352  | 0.0313098    | 0.959222  | 0.988355  |
| Snap25_j1        | 9.87115     | 13.8714   | 0.490826     | 0.0166214 | 0.123769  |
| Btbd3_j1         | 0           | 0.203772  | 0            | 1         | 1         |
| Btbd3_j3         | 12.8446     | 12.648    | 0            | 1         | 1         |
| Macro2_j5        | 0.834037    | 0.740313  | -0.171975    | 0.814511  | 0.939456  |
| Macro2_j7        | 0.389533    | 0.632959  | 0.700366     | 0.298846  | 0.645614  |
| Macro2_j17       | 0.165141    | 0.212994  | 0.367114     | 0.520346  | 0.797861  |
| Pcsk2_j3         | 12.7543     | 11.8871   | 0            | 1         | 1         |
| XLOC_018427      | 0.153873    | 0.267421  | 0.797375     | 0.135384  | 0.457784  |
| 8430406I07Rik    | 2.50092     | 2.42801   | -0.0426823   | 0.797247  | 0.932581  |
| LOC668917_j3     | 0.19564     | 0.181385  | -0.109146    | 0.905438  | 0.969961  |
| Dtd1_j1          | 2.35137     | 4.47646   | 0            | 1         | 1         |
| Rin2_j3          | 0.444393    | 0.349115  | -0.348136    | 0.34423   | 0.684009  |
| Rin2_j5          | 0.000246036 | 0.699681  | 11.4736      | 0.501485  | 0.785549  |
| Naa20_j1         | 0.84645     | 0.773979  | -0.129132    | 0.673938  | 0.877026  |
| Plk1s1_j2        | 0           | 0.589062  | 1.79769e+308 | 3.46E-05  | 0.000873  |
| Cstl1_j1         | 0.0480693   | 0.132582  | 0            | 1         | 1         |
| XLOC_018456      | 0.0668988   | 0.0913143 | 0.448861     | 0.768197  | 1         |
| Nsfl1c           | 4.58911     | 6.53939   | 0.510941     | 0.0001881 | 0.0036463 |
| Nsfl1c_j5        | 1.45483     | 1.30763   | -0.153898    | 0.508234  | 0.790152  |
| Fkbp1a_j1        | 57.1701     | 72.7289   | 0.347268     | 0.000506  | 0.008225  |
| Fkbp1a_j6        | 4.65305     | 7.18698   | 0.62721      | 0.07512   | 0.33088   |
| 5430405G05Rik_j2 | 0.305797    | 0.430206  | 0.492452     | 0.528352  | 0.801996  |
| 5430405G05Rik_j3 | 0           | 0.344301  | 1.79769e+308 | 0.0108273 | 0.090747  |
| 2310046K01Rik    | 0.802079    | 0.296911  | -1.43371     | 0.0034272 | 0.0382719 |
| Csnk2a1_j5       | 41.5768     | 42.68     | 0.0377831    | 0.676501  | 0.878299  |

|                  |            |           |              |           |           |
|------------------|------------|-----------|--------------|-----------|-----------|
| Tbc1d20_j3       | 4.65754    | 6.71888   | 0            | 1         | 1         |
| H13_j2           | 19.5869    | 22.8897   | 0            | 1         | 1         |
| Tpx2             | 0.0811427  | 0.169307  | 1.06111      | 0.0966313 | 0.383949  |
| Xkr7_j1          | 0          | 0.0842116 | 0            | 1         | 1         |
| Kif3b_j2         | 7.11974    | 7.30081   | 0            | 1         | 1         |
| Dnmt3b_j1        | 0.0496886  | 0.121975  | 1.2956       | 0.259679  | 1         |
| XLOC_018486      | 0.0946818  | 0.129743  | 0.454496     | 0.77183   | 1         |
| Dynlrb1_j4       | 0          | 8.39631   | 1.79769e+308 | 2.45E-07  | 1.19E-05  |
| Map1lc3a_j1      | 23.8078    | 24.4856   | 0.0404983    | 0.679274  | 0.879479  |
| Acss2_j1         | 0.277953   | 0.43418   | 0            | 1         | 1         |
| Myh7b_j9         | 0          | 0.106286  | 0            | 1         | 1         |
| Cep250_j8        | 2.0705     | 2.09046   | 0            | 1         | 1         |
| Gm14240          | 0.22974    | 0.342409  | 0.575718     | 0.525885  | 0.800977  |
| Spag4_j6         | 0.13922    | 0.163175  | 0.229054     | 0.724418  | 0.901947  |
| Spag4_j7         | 0.424686   | 0.314423  | -0.433691    | 0.51301   | 0.792379  |
| Romo1            | 30.8856    | 36.0922   | 0            | 1         | 1         |
| Phf20_j6         | 5.89589    | 6.69337   | 0            | 1         | 1         |
| O610011L14Rik_j1 | 0.358461   | 0.414127  | 0.208259     | 0.467609  | 0.766717  |
| Dlgap4_j2        | 3.65421    | 3.46865   | -0.0751857   | 0.76822   | 0.921044  |
| Dlgap4_j3        | 0.0168623  | 0.33692   | 4.32053      | 0.0078129 | 0.0713527 |
| Myl9_j1          | 3.54075    | 4.71633   | 0.41361      | 0.0672158 | 0.309991  |
| Src_j1           | 0          | 0.154297  | 0            | 1         | 1         |
| Lbp_j1           | 1.00822    | 2.06999   | 1.03782      | 0.0047909 | 0.0491379 |
| Snhg11_j2        | 8.28641    | 6.21266   | -0.415538    | 0.0040188 | 0.0430404 |
| Snhg11_j1        | 0.0400472  | 0.11226   | 1.48707      | 0.0758077 | 1         |
| Ralgapb_j1       | 1.52169    | 2.72627   | 0.841259     | 1.39E-08  | 9.51E-07  |
| Actr5_j1         | 0.0859438  | 0.183483  | 1.09418      | 0.0925474 | 0.374371  |
| Dhx35_j4         | 0.650676   | 0.701244  | 0            | 1         | 1         |
| Top1_j1          | 0.00160605 | 0.478418  | 8.21861      | 0.166633  | 0.502965  |
| Plcg1_j3         | 0.302005   | 0.460074  | 0.607291     | 0.13296   | 0.453791  |
| Lpin3_j2         | 0.0721142  | 0.127086  | 0.817452     | 0.213608  | 1         |
| 9430021M05Rik    | 1.34398    | 1.03649   | -0.37481     | 0.236624  | 0.583799  |
| L3mbtl_j1        | 0.0458338  | 0.079611  | 0.796557     | 0.433789  | 1         |
| L3mbtl_j7        | 0          | 0.181284  | 1.79769e+308 | 0.0021882 | 0.0267849 |
| XLOC_018552      | 0.0247685  | 0.0550628 | 1.15257      | 0.505747  | 1         |
| Wisp2            | 0.112069   | 0.160638  | 0.519423     | 0.473164  | 0.769998  |
| Wisp2_j1         | 0          | 0.0768736 | 1.79769e+308 | 0.0803465 | 1         |
| Ywhab_j3         | 0          | 0.602645  | 1.79769e+308 | 0.0029492 | 0.0340068 |
| Ywhab_j4         | 9.81113    | 10.8119   | 0.140135     | 0.665099  | 0.873092  |
| Stk4_j2          | 0.248911   | 0         | 0            | 1         | 1         |
| Rbpjl_j2         | 0.0600952  | 0.159428  | 1.40758      | 0.116568  | 0.424591  |
| Sys1_j2          | 1.09167    | 1.17339   | 0            | 1         | 1         |
| Pigt_j1          | 8.3041     | 8.87263   | 0.0955389    | 0.607425  | 0.845325  |
| AK043662_j3      | 6.10E-06   | 0.111911  | 14.1643      | 0.992384  | 1         |
| Wfdc2_j3         | 1.13331    | 0.753091  | -0.589648    | 0.429255  | 0.742566  |
| Dnttip1_j1       | 3.46501    | 5.1391    | 0.568658     | 0.0191721 | 0.136925  |
| Zswim3_j2        | 0          | 0.545151  | 0            | 1         | 1         |

|                  |             |           |              |           |           |
|------------------|-------------|-----------|--------------|-----------|-----------|
| Ctsa_j2          | 38.8192     | 39.2744   | 0.016818     | 0.853956  | 0.953758  |
| Pcif1_j2         | 0.82028     | 0.656021  | -0.322374    | 0.240547  | 0.588007  |
| Arfgef2_j2       | 9.69024     | 10.7656   | 0            | 1         | 1         |
| Snai1_j1         | 0           | 0.0918579 | 1.79769e+308 | 0.131931  | 1         |
| Gm14249_j1       | 0.130014    | 0.162942  | 0.325692     | 0.699678  | 0.889447  |
| Tshz2_j4         | 0.0748216   | 6.63118   | 0            | 1         | 1         |
| XLOC_018612      | 0.012463    | 0.1657    | 3.73285      | 0.191897  | 0.534088  |
| 2410001C21Rik_j1 | 0           | 0.424938  | 0            | 1         | 1         |
| Rbm38_j1         | 0.0500652   | 0.103106  | 1.04225      | 0.446607  | 1         |
| XLOC_018620      | 0.0989987   | 0.121965  | 0.300986     | 0.785801  | 1         |
| XLOC_018620      | 0.0631205   | 0.113285  | 0.843778     | 0.354813  | 1         |
| Edn3_j1          | 0           | 0.0662086 | 1.79769e+308 | 0.0404871 | 1         |
| Edn3             | 0.292283    | 0.198166  | -0.560657    | 0.20819   | 0.552263  |
| Edn3_j2          | 8.98E-06    | 0.0808565 | 13.1366      | 0.988137  | 1         |
| XLOC_018630      | 0.0636557   | 0.114002  | 0.840703     | 0.500869  | 1         |
| Gm14403_j3       | 1.01786     | 0.705506  | 0            | 1         | 1         |
| Cdh26_j2         | 0.0127984   | 0.0593654 | 2.21366      | 0.345115  | 1         |
| Lsm14b_j2        | 0.00310905  | 2.67643   | 9.74962      | 0.0466331 | 0.247617  |
| Gtpbp5_j6        | 0.196775    | 0.225446  | 0.196231     | 0.845658  | 0.951227  |
| Osbpl2_j1        | 0           | 0.148435  | 0            | 1         | 1         |
| Slco4a1_j6       | 0.0414546   | 0.325398  | 2.9726       | 0.0015022 | 0.0197677 |
| Slco4a1_j7       | 0.245956    | 0.178355  | -0.463653    | 0.482343  | 0.775514  |
| Ntsr1_j1         | 0.111853    | 0.125996  | 0.171776     | 0.76657   | 1         |
| 1600027N09Rik_j4 | 0.0802248   | 0.0322056 | 0            | 1         | 1         |
| 1600027N09Rik_j5 | 0.342817    | 0.983104  | 0            | 1         | 1         |
| Arfgap1_j3       | 1.4799      | 0.848439  | -0.802616    | 7.10E-05  | 0.0016032 |
| Arfgap1_j4       | 0.526419    | 0.751202  | 0.51299      | 0.0363559 | 0.210778  |
| Arfgap1_j6       | 0.000102161 | 0.487724  | 12.221       | 0.631356  | 0.85652   |
| Col20a1_j11      | 0.0896617   | 0.102658  | 0.195285     | 0.780818  | 1         |
| Pdpf_j2          | 2.69979     | 2.951     | 0            | 1         | 1         |
| Pdpf_j3          | 1.24866     | 1.2475    | 0            | 1         | 1         |
| Pdpf_j4          | 3.5553      | 4.11522   | 0            | 1         | 1         |
| Zgpat_j7         | 0.534645    | 0.630007  | 0            | 1         | 1         |
| Dnajc5_j1        | 0.117028    | 0.14054   | 0            | 1         | 1         |
| Oprl1_j1         | 0           | 0.407983  | 0            | 1         | 1         |
| Myt1_j10         | 0.467716    | 0.568755  | 0.282174     | 0.131877  | 0.451884  |
| Myt1_j14         | 0           | 0.051672  | 1.79769e+308 | 0.00037   | 1         |
| Rpp38_j1         | 4.24004     | 4.38635   | 0            | 1         | 1         |
| Mcm10_j4         | 0           | 0.0630884 | 1.79769e+308 | 0.0901958 | 1         |
| Camk1d_j1        | 0.00661883  | 1.16421   | 0            | 1         | 1         |
| Dhtkd1_j13       | 0.254636    | 0.180959  | -0.492772    | 0.246992  | 0.594488  |
| 5430407P10Rik    | 0.095948    | 0.0610023 | -0.653389    | 0.496143  | 1         |
| 5430407P10Rik_j5 | 0.0996094   | 0.108253  | 0.120057     | 0.867331  | 1         |
| Celf2_j5         | 9.22E-05    | 0.736874  | 0            | 1         | 1         |
| Celf2            | 0.584972    | 0.786755  | 0            | 1         | 1         |
| Pfkfb3           | 0.973471    | 1.49683   | 0            | 1         | 1         |
| Rbm17_j1         | 2.68934     | 2.8508    | 0.0841173    | 0.780284  | 0.925835  |

|             |            |           |               |           |           |
|-------------|------------|-----------|---------------|-----------|-----------|
| Fbxo18_j6   | 3.62832    | 4.06335   | 0             | 1         | 1         |
| Fbxo18      | 5.92061    | 6.52217   | 0             | 1         | 1         |
| Cubn_j6     | 0.403616   | 0.413519  | 0.0349709     | 0.961231  | 0.988989  |
| Cubn_j5     | 0.0530206  | 0.201881  | 1.92888       | 0.0089601 | 0.0788679 |
| Cubn_j10    | 0.104731   | 0.189895  | 0.858507      | 0.137988  | 0.461751  |
| Ptpla_j10   | 0.0293977  | 0.172192  | 2.55024       | 0.0060922 | 0.0592898 |
| Ptpla_j9    | 1.94328    | 2.05667   | 0.0818131     | 0.785587  | 0.928253  |
| Nsun6_j3    | 0.292582   | 0.359694  | 0.297927      | 0.422674  | 0.738516  |
| Nsun6_j2    | 0.116779   | 0.0835414 | -0.483216     | 0.496762  | 1         |
| Pip4k2a_j3  | 3.1322     | 6.05109   | 0             | 1         | 1         |
| Abi1_j1     | 2.45068    | 3.46282   | 0             | 1         | 1         |
| Abi1_j4     | 11.12      | 11.2917   | 0             | 1         | 1         |
| Abi1_j3     | 0.00504659 | 0.907097  | 0             | 1         | 1         |
| Abi1_j2     | 4.58012    | 6.04037   | 0             | 1         | 1         |
| Spopl_j2    | 0          | 0.0513    | 0             | 1         | 1         |
| Hnmt_j1     | 2.99158    | 3.63732   | 0.28197       | 0.172229  | 0.509505  |
| Cacna1b_j9  | 1.48176    | 1.86797   | 0             | 1         | 1         |
| Ehmt1_j5    | 0.127585   | 0.0468767 | -1.44452      | 0.286676  | 1         |
| Arrdc1_j3   | 2.05025    | 2.46015   | 0             | 1         | 1         |
| Ndor1_j10   | 1.46438    | 1.38174   | 0             | 1         | 1         |
| BC029214_j3 | 0.427835   | 0.652353  | 0.608599      | 0.0787945 | 0.340448  |
| BC029214_j1 | 0.848414   | 0.865146  | 0.0281765     | 0.91959   | 0.974745  |
| BC029214_j2 | 0.355045   | 0.517436  | 0.543376      | 0.394064  | 0.719809  |
| Traf2_j5    | 0          | 0.322823  | 1.79769e+308  | 3.36E-06  | 0.0001199 |
| Tmem141_j2  | 0.0401339  | 0.832283  | 0             | 1         | 1         |
| Tmem141_j3  | 2.35526    | 1.56057   | 0             | 1         | 1         |
| Camsap1_j4  | 2.19271    | 2.03705   | 0             | 1         | 1         |
| Ubac1_j4    | 1.73177    | 2.50869   | 0.534687      | 0.0507137 | 0.260788  |
| Nacc2_j3    | 4.13554    | 7.16663   | 0             | 1         | 1         |
| Sdccag3_j1  | 5.27634    | 5.80241   | 0             | 1         | 1         |
| Sdccag3     | 8.77602    | 9.67944   | 0             | 1         | 1         |
| Inpp5e_j3   | 0.0612586  | 0.194202  | 0             | 1         | 1         |
| Sec16a_j6   | 3.89367    | 3.94992   | 0             | 1         | 1         |
| Notch1_j2   | 0.0711533  | 0         | -1.79769e+308 | 2.21E-05  | 1         |
| Snhg7_j3    | 0.732906   | 1.15757   | 0.659395      | 0.387159  | 0.714995  |
| Rexo4_j2    | 0.0633979  | 0.106197  | 0.744231      | 0.500701  | 1         |
| Fam163b_j2  | 4.22E-05   | 0.164341  | 11.9275       | 0.944379  | 0.983433  |
| Gm13399_j1  | 0.0515523  | 0.321181  | 2.63928       | 0.0024863 | 0.029709  |
| VAV2_j5     | 5.19992    | 6.35875   | 0             | 1         | 1         |
| VAV2_j6     | 2.55337    | 3.04546   | 0             | 1         | 1         |
| Brd3_j2     | 0.0544985  | 0.150116  | 0             | 1         | 1         |
| Brd3_j3     | 0          | 0.408451  | 0             | 1         | 1         |
| Gm13373_j5  | 0.405146   | 0.371577  | -0.124783     | 0.817919  | 0.940936  |
| Cel_j1      | 0.0774346  | 0.126592  | 0.709139      | 0.396923  | 1         |
| Gtf3c5_j2   | 0.734811   | 1.04251   | 0             | 1         | 1         |
| Ntng2_j8    | 1.86759    | 1.15117   | 0             | 1         | 1         |
| XLOC_018793 | 0          | 0.0668002 | 1.79769e+308  | 0.0960603 | 1         |



|                  |             |           |              |           |          |
|------------------|-------------|-----------|--------------|-----------|----------|
| Trub2            | 1.49155     | 1.5487    | 0            | 1         | 1        |
| Sh3glb2_j6       | 42.5704     | 39.8337   | 0            | 1         | 1        |
| Sh3glb2          | 2.94195     | 3.43281   | 0            | 1         | 1        |
| Crat_j1          | 0.0856264   | 0.125994  | 0            | 1         | 1        |
| AK138941_j1      | 0.127073    | 0.284722  | 1.1639       | 0.116801  | 0.425026 |
| 1700001O22Rik_j6 | 0.165391    | 0.106895  | -0.629692    | 0.553894  | 0.817269 |
| 1700001O22Rik_j5 | 0           | 0.141888  | 1.79769e+308 | 0.0281567 | 1        |
| Tor1a            | 0.5875      | 0.77139   | 0.39287      | 0.0515092 | 0.263177 |
| Fnbp1_j3         | 11.4687     | 12.5504   | 0            | 1         | 1        |
| Fnbp1_j4         | 0           | 0.0853611 | 0            | 1         | 1        |
| Fnbp1_j6         | 1.79493     | 1.34903   | 0            | 1         | 1        |
| Fibcd1_j1        | 0.11674     | 0.133114  | 0.189365     | 0.751498  | 1        |
| Uck1_j5          | 2.20549     | 2.06366   | -0.095896    | 0.657196  | 0.869349 |
| Dnm1_j11         | 57.6862     | 57.9809   | 0            | 1         | 1        |
| Slc25a25_j2      | 2.15831     | 2.83127   | 0            | 1         | 1        |
| Slc2a8_j4        | 3.02378     | 1.89993   | 0            | 1         | 1        |
| GLUTX1           | 2.1114      | 2.05263   | 0            | 1         | 1        |
| Garnl3_j2        | 1.79679     | 2.81823   | 0            | 1         | 1        |
| Garnl3_j1        | 12.0266     | 11.1401   | 0            | 1         | 1        |
| Zbtb43_j1        | 0.32099     | 0.31994   | 0            | 1         | 1        |
| Fam125b_j3       | 1.53754     | 1.99986   | 0            | 1         | 1        |
| Pbx3_j2          | 0           | 0.424041  | 0            | 1         | 1        |
| Hc_j1            | 0.126354    | 0.113545  | -0.154198    | 0.903955  | 1        |
| Rab14_j5         | 20.3436     | 23.7277   | 0            | 1         | 1        |
| Rab14_j4         | 0.435114    | 0.566179  | 0            | 1         | 1        |
| Ggta1            | 1.17464     | 1.5251    | 0            | 1         | 1        |
| Ggta1_j9         | 0.371472    | 0.722523  | 0            | 1         | 1        |
| Ttll11_j3        | 0.000110935 | 0.189476  | 0            | 1         | 1        |
| Ndufa8_j2        | 41.6        | 43.752    | 0            | 1         | 1        |
| Rc3h2_j3         | 0           | 0.0583842 | 1.79769e+308 | 0.0060087 | 1        |
| Zbtb6_j1         | 0.301782    | 0.192225  | 0            | 1         | 1        |
| Strbp_j6         | 0           | 0.67105   | 0            | 1         | 1        |
| Dennd1a_j5       | 0.0786889   | 0.0440112 | 0            | 1         | 1        |
| Nr6a1_j7         | 0           | 0.0878684 | 1.79769e+308 | 0.0034346 | 1        |
| Golga1_j3        | 1.94133     | 1.77752   | -0.127181    | 0.403233  | 0.726214 |
| Golga1           | 4.77042     | 4.23206   | -0.172759    | 0.245758  | 0.593119 |
| Scai_j6          | 0           | 0.271168  | 0            | 1         | 1        |
| Scai_j7          | 0.256279    | 0.141537  | 0            | 1         | 1        |
| Lrp1b_j10        | 0.196415    | 0.142441  | -0.463545    | 0.481221  | 0.774906 |
| Zeb2_j5          | 2.12809     | 2.70584   | 0            | 1         | 1        |
| Mmadhc_j1        | 3.8859      | 3.73306   | 0            | 1         | 1        |
| Mmadhc_j2        | 1.31362     | 3.29458   | 0            | 1         | 1        |
| Rnd3_j1          | 0           | 0.349617  | 0            | 1         | 1        |
| Nmi_j3           | 0.671679    | 0.384761  | 0            | 1         | 1        |
| Nmi_j4           | 0.0218361   | 0.857072  | 0            | 1         | 1        |
| Neb_j3           | 0.163945    | 0.0958974 | -0.773652    | 0.2107    | 0.555375 |
| Neb_j13          | 0.0191441   | 0.0742488 | 1.95547      | 0.299149  | 1        |

|                  |             |           |              |           |           |
|------------------|-------------|-----------|--------------|-----------|-----------|
| Cacnb4           | 1.04487     | 0.705305  | 0            | 1         | 1         |
| Prpf40a_j5       | 1.19296     | 0.955908  | 0            | 1         | 1         |
| Acvr1_j2         | 0.267606    | 0.736395  | 0            | 1         | 1         |
| Acvr1_j3         | 0           | 1.59306   | 0            | 1         | 1         |
| Wdsub1_j6        | 1.30978     | 1.51493   | 0            | 1         | 1         |
| Wdsub1_j4        | 1.09868     | 1.30111   | 0            | 1         | 1         |
| Wdsub1_j5        | 0.864966    | 0.806499  | 0            | 1         | 1         |
| Baz2b_j9         | 0.137029    | 1.02266   | 2.89977      | 0         | 0         |
| AK166079_j1      | 0.238772    | 0.168287  | -0.504707    | 0.689479  | 0.884848  |
| AK166079_j2      | 0.305893    | 0.303387  | -0.0118649   | 0.991302  | 0.997429  |
| Ly75_j4          | 0.0257043   | 0.117803  | 2.19629      | 0.0064281 | 1         |
| Rbms1            | 12.0765     | 8.05737   | 0            | 1         | 1         |
| Fap_j5           | 0           | 0.0472856 | 1.79769e+308 | 0.0815479 | 1         |
| Slc38a11_j4      | 0           | 0.092097  | 1.79769e+308 | 0.0204618 | 1         |
| Slc38a11_j5      | 0.246306    | 0.108571  | -1.18181     | 0.0922351 | 0.373713  |
| Scn3a_j1         | 0.310406    | 0.381142  | 0.29617      | 0.428934  | 0.742566  |
| Scn3a_j8         | 4.46E-05    | 0.478172  | 13.3889      | 0.886134  | 0.963821  |
| Scn3a_j9         | 0.142102    | 0.15855   | 0.158016     | 0.711875  | 0.895433  |
| Galnt3_j1        | 0.519134    | 0.884892  | 0.769395     | 0.0138177 | 0.108513  |
| Scn1a_j1         | 10.1992     | 7.09429   | 0            | 1         | 1         |
| Scn7a_j4         | 26.3875     | 21.9112   | 0            | 1         | 1         |
| Stk39_j3         | 14.1267     | 19.8654   | 0            | 1         | 1         |
| Stk39_j5         | 11.876      | 14.3578   | 0            | 1         | 1         |
| Spc25            | 0.0749272   | 0.132761  | 0.825264     | 0.432253  | 1         |
| Fastkd1_j2       | 0.000698566 | 0.704601  | 0            | 1         | 1         |
| mKIAA0137_j4     | 5.45356     | 6.36988   | 0            | 1         | 1         |
| Mettl8_j6        | 0.877754    | 1.83737   | 0            | 1         | 1         |
| Chrna1_j3        | 0.271384    | 0.638044  | 1.23332      | 0.012304  | 0.0999771 |
| Chn1_j2          | 0.222926    | 0.25877   | 0            | 1         | 1         |
| Atf2_j1          | 0.112101    | 0         | 0            | 1         | 1         |
| Atf2             | 4.2179      | 3.15854   | 0            | 1         | 1         |
| 1700109F18Rik_j1 | 0.136073    | 0.161474  | 0.24692      | 0.743441  | 0.910275  |
| Nfe2l2_j1        | 0           | 1.62818   | 1.79769e+308 | 1.86E-10  | 1.77E-08  |
| Pde11a_j1        | 2.17181     | 1.51206   | 0            | 1         | 1         |
| Sestd1_j2        | 2.45549     | 4.16089   | 0            | 1         | 1         |
| Cwc22_j3         | 0.264394    | 0.274374  | 0.0534532    | 0.950272  | 0.985635  |
| Cwc22_j9         | 0.169913    | 0.278468  | 0.712714     | 0.559423  | 0.820619  |
| Pde1a_j2         | 0           | 0.218997  | 0            | 1         | 1         |
| Pde1a_j5         | 0           | 0.856652  | 0            | 1         | 1         |
| Nckap1_j6        | 14.5306     | 14.6502   | 0            | 1         | 1         |
| Ctnnd1_j4        | 0.215953    | 0.293086  | 0.440604     | 0.320388  | 0.66367   |
| Rtn4rl2_j3       | 2.10944     | 1.64619   | 0            | 1         | 1         |
| P2rx3_j7         | 0.323967    | 1.08208   | 0            | 1         | 1         |
| P2rx3_j6         | 0.758217    | 0.43398   | 0            | 1         | 1         |
| Ptprj            | 1.30489     | 1.43637   | 0.138501     | 0.397336  | 0.721699  |
| Ptpmt1_j1        | 8.40683     | 8.93017   | 0.0871256    | 0.483952  | 0.776148  |
| Slc39a13_j3      | 1.46711     | 1.41142   | 0            | 1         | 1         |

|                  |            |                        |           |           |           |
|------------------|------------|------------------------|-----------|-----------|-----------|
| Madd_j10         | 0.0333845  | 0.808068               | 0         | 1         | 1         |
| Zfp408           | 0.171873   | 0.257049               | 0         | 1         | 1         |
| Dgkz_j8          | 25.5011    | 26.2004                | 0         | 1         | 1         |
| Cry2_j3          | 9.25573    | 11.4073                | 0         | 1         | 1         |
| Cry2_j4          | 4.8267     | 3.19947                | 0         | 1         | 1         |
| Cry2_j5          | 9.37234    | 10.5952                | 0         | 1         | 1         |
| Slc35c1_j1       | 0.635176   | 0.623268               | 0         | 1         | 1         |
| Prdm11_j5        | 0          | 0.114821 1.79769e+308  | 0.0289132 | 1         | 1         |
| Accs_j4          | 0          | 0.222723               | 0         | 1         | 1         |
| Hsd17b12_j1      | 10.6751    | 12.5868                | 0.237663  | 0.110634  | 0.413936  |
| XLOC_019019      | 0.0677335  | 0.289084               | 2.09355   | 0.247397  | 0.594944  |
| Api5_j1          | 2.88373    | 2.71696                | 0         | 1         | 1         |
| Ldlrad3_j1       | 0          | 0.228925 1.79769e+308  | 0.00048   | 0.0078693 | 1         |
| Cd44_j3          | 0.0395276  | 30.4175                | 0         | 1         | 1         |
| Ehf_j1           | 0          | 0.0750858 1.79769e+308 | 0.0133415 | 1         | 1         |
| Nat10_j2         | 0.777825   | 0.760893               | 0         | 1         | 1         |
| Caprin1          | 11.4479    | 11.8037                | 0         | 1         | 1         |
| D430041D05Rik_j6 | 0.050713   | 0.0411336              | -0.30204  | 0.663563  | 1         |
| D430041D05Rik_j7 | 0.112395   | 0.0645038              | -0.801119 | 0.131102  | 1         |
| Pin1-ps1         | 0          | 0.271101 1.79769e+308  | 0.0285286 | 0.17974   | 1         |
| Qser1_j1         | 0.0267721  | 0.123185               | 2.20203   | 0.0019876 | 1         |
| Dnajc24_j1       | 4.25981    | 3.52705                | -0.272328 | 0.316366  | 0.660085  |
| AK084494_j3      | 0          | 0.266737 1.79769e+308  | 0.0416812 | 0.23036   | 1         |
| AK084494_j4      | 0.0779826  | 0.104453               | 0.421631  | 0.744309  | 1         |
| 2700007P21Rik_j2 | 0.00207933 | 0.331546               | 0         | 1         | 1         |
| Ryr3_j5          | 0.0823423  | 0.0940592              | 0.191936  | 0.740205  | 1         |
| Ryr3_j12         | 0.0436775  | 0.117938               | 1.43307   | 0.2243    | 1         |
| Scg5_j2          | 18.0314    | 15.3116                | 0         | 1         | 1         |
| Meis2            | 2.20463    | 2.38547                | 0         | 1         | 1         |
| Rasgrp1_j1       | 3.96755    | 4.24514                | 0         | 1         | 1         |
| Fsip1            | 0.0659442  | 0.124038               | 0.911464  | 0.324054  | 1         |
| Plcb2_j2         | 0          | 0.0869256 1.79769e+308 | 0.0789648 | 1         | 1         |
| A430105I19Rik_j6 | 0          | 0.0938421              | 0         | 1         | 1         |
| Dnajc17_j1       | 0.148361   | 0.11694                | -0.343347 | 0.765041  | 0.919641  |
| Spnb5_j13        | 0.125545   | 0.133873               | 0.0926636 | 0.85881   | 1         |
| Spnb5_j8         | 0          | 0.112037 1.79769e+308  | 0.0141709 | 1         | 1         |
| Spnb5_j9         | 0.0281507  | 0.0770545              | 1.45271   | 0.260733  | 1         |
| Spnb5_j11        | 0.0335646  | 0.0785897              | 1.2274    | 0.422168  | 1         |
| Spnb5_j3         | 0.0940407  | 0.173655               | 0.88487   | 0.245316  | 0.592781  |
| Pla2g4e_j1       | 0          | 0.0495508 1.79769e+308 | 0.0473449 | 1         | 1         |
| Tmem87a_j2       | 0.0858576  | 0.232432               | 0         | 1         | 1         |
| Cdan1_j1         | 0.147338   | 0.204411               | 0         | 1         | 1         |
| Tgm5_j1          | 0.0181335  | 0.0682368              | 1.91189   | 0.291949  | 1         |
| Tgm5             | 0.112101   | 0.349411               | 1.64012   | 0.004436  | 0.0464363 |
| Tgm5_j6          | 0          | 0.0958914 1.79769e+308 | 0.01792   | 1         | 1         |
| Ppip5k1_j3       | 0.0458354  | 0.0572341              | 0         | 1         | 1         |
| Duox2_j1         | 0.0253042  | 0.0625386              | 1.30537   | 0.397872  | 1         |

|                  |             |           |              |           |           |
|------------------|-------------|-----------|--------------|-----------|-----------|
| Shf              | 1.74376     | 2.07151   | 0.248476     | 0.398563  | 0.722606  |
| Fbn1_j4          | 0           | 0.0880433 | 1.79769e+308 | 0.0001961 | 1         |
| Cep152_j2        | 0.336197    | 0.29852   | -0.171478    | 0.772921  | 0.922948  |
| Cep152_j3        | 0.078144    | 0.0983639 | 0.331993     | 0.696992  | 1         |
| Cep152_j13       | 0           | 0.0791587 | 1.79769e+308 | 0.0108591 | 1         |
| Shc4             | 1.33229     | 1.2559    | -0.0851825   | 0.684196  | 0.881956  |
| Secisbp2l_j4     | 0.000278929 | 2.58341   | 0            | 1         | 1         |
| Hdc_j3           | 0.16021     | 0.0253847 | -2.65793     | 0.0969246 | 0.384612  |
| Usp50_j2         | 0.154946    | 0.19003   | 0.294457     | 0.707209  | 0.893223  |
| Trpm7_j6         | 3.31951     | 3.14451   | 0            | 1         | 1         |
| 2010106G01Rik_j3 | 2.36061     | 2.40218   | 0            | 1         | 1         |
| 2010106G01Rik_j2 | 0.00208131  | 0.743386  | 0            | 1         | 1         |
| Ciao1_j1         | 0.713626    | 0.601933  | 0            | 1         | 1         |
| Kcnip3_j1        | 14.02       | 10.0208   | 0            | 1         | 1         |
| Kcnip3_j2        | 49.398      | 25.3668   | 0            | 1         | 1         |
| Zfp661_j2        | 0.105407    | 0.195067  | 0.887991     | 0.108833  | 0.410409  |
| Nphp1_j2         | 0.0793428   | 0.0681916 | 0            | 1         | 1         |
| Nphp1_j3         | 0.256201    | 0.195861  | 0            | 1         | 1         |
| Gm14005_j3       | 0           | 0.0705086 | 1.79769e+308 | 0.131272  | 1         |
| XLOC_019156      | 0.0393847   | 0.130417  | 1.72743      | 0.146945  | 1         |
| Gm14029          | 0.0135597   | 0.115671  | 3.09263      | 0.164837  | 1         |
| Ckap2l_j1        | 0           | 0.132823  | 1.79769e+308 | 0.0229331 | 1         |
| Idh3b_j4         | 24.7834     | 26.486    | 0.0958569    | 0.329109  | 0.671446  |
| Idh3b_j7         | 65.4298     | 66.7389   | 0.0285789    | 0.762367  | 0.918113  |
| Cpxm1            | 4.28099     | 5.08998   | 0.249715     | 0.0890673 | 0.365734  |
| XLOC_019171      | 0.0716628   | 0.0776313 | 0.115413     | 0.943343  | 1         |
| Fastkd5          | 0.447273    | 0.363022  | 0            | 1         | 1         |
| Slc4a11_j1       | 0.0677107   | 0.145086  | 0            | 1         | 1         |
| A730017L22Rik_j2 | 0.126234    | 0.0776315 | -0.701386    | 0.303641  | 1         |
| Adam33_j4        | 0.285554    | 0.207207  | -0.46269     | 0.582621  | 0.832835  |
| Siglec1_j1       | 0.201559    | 0.417224  | 1.04962      | 0.0144034 | 0.111726  |
| 1700037H04Rik_j2 | 0.238627    | 0.263937  | 0            | 1         | 1         |
| Spef1_j1         | 0.0533173   | 1.07627   | 0            | 1         | 1         |
| 5730494N06Rik_j2 | 6.61078     | 9.67789   | 0            | 1         | 1         |
| Gpcpd1_j6        | 2.44976     | 2.43189   | 0            | 1         | 1         |
| Gpcpd1           | 1.27892     | 2.11898   | 0            | 1         | 1         |
| Tmx4_j1          | 29.3491     | 27.3481   | -0.101879    | 0.250044  | 0.597613  |
| XLOC_019201      | 0.11883     | 0.166431  | 0.486022     | 0.570222  | 0.826188  |
| Jag1_j6          | 0.279783    | 0.778311  | 0            | 1         | 1         |
| Jag1_j7          | 0.122121    | 0.57865   | 0            | 1         | 1         |
| Tasp1_j2         | 0.786143    | 0.276112  | 0            | 1         | 1         |
| Esf1_j1          | 5.1696      | 5.05415   | -0.0325833   | 0.806282  | 0.935928  |
| Bfsp1_j4         | 0           | 0.18799   | 1.79769e+308 | 0.0110655 | 0.0923465 |
| Bfsp1_j5         | 0.110978    | 0.159558  | 0.523803     | 0.539447  | 0.808383  |
| Rrbp1_j7         | 3.89178     | 5.32633   | 0            | 1         | 1         |
| XLOC_019220      | 0.0252043   | 0.10325   | 2.0344       | 0.287898  | 1         |
| Ralgapa2_j3      | 0           | 0.0980002 | 1.79769e+308 | 0.0002501 | 1         |

|                  |           |                        |            |           |           |
|------------------|-----------|------------------------|------------|-----------|-----------|
| Zfp120           | 0         | 0.657602               | 0          | 1         | 1         |
| 2310001A20Rik_j3 | 1.09151   | 2.13352                | 0          | 1         | 1         |
| Ninl_j2          | 0         | 0.0885837 1.79769e+308 | 0.0034014  |           | 1         |
| Snph_j1          | 7.87661   | 6.97011                | 0          | 1         | 1         |
| Rbck1_j4         | 2.05708   | 2.40082                | 0          | 1         | 1         |
| Dusp15_j1        | 6.06929   | 5.515                  | 0          | 1         | 1         |
| AK010870_j4      | 0.884575  | 0.450639               | -0.973012  | 0.0560723 | 0.276974  |
| AK010870_j5      | 0         | 0.114315 1.79769e+308  | 0.0528465  |           | 1         |
| 8430427H17Rik    | 1.03158   | 1.73916                | 0          | 1         | 1         |
| Necab3_j3        | 24.0832   | 16.3698                | 0          | 1         | 1         |
| Necab3_j5        | 0.0947685 | 0.0971137              | 0          | 1         | 1         |
| Ncoa6_j1         | 0.302886  | 0.260852               | -0.215542  | 0.542042  | 0.8099    |
| Trpc4ap_j2       | 1.05394   | 1.59441                | 0          | 1         | 1         |
| Edem2_j1         | 5.9338    | 6.92435                | 0.222722   | 0.305535  | 0.650747  |
| BC029722         | 7.53645   | 7.29165                | -0.0476382 | 0.658836  | 0.870345  |
| Uqcc_j5          | 0.448626  | 0                      | 0          | 1         | 1         |
| Uqcc_j6          | 1.53098   | 0.515579               | 0          | 1         | 1         |
| 6430550D23Rik_j4 | 0.0830982 | 0.0306575              | -1.43858   | 0.0618848 | 1         |
| Nfs1_j1          | 10.0934   | 8.01877                | 0          | 1         | 1         |
| Ndr3_j2          | 20.1681   | 21.1489                | 0          | 1         | 1         |
| Ndr3_j1          | 3.92124   | 2.68321                | 0          | 1         | 1         |
| Dsn1_j3          | 0.489642  | 0.485578               | -0.0120252 | 0.977049  | 0.993297  |
| Samhd1_j2        | 0.947773  | 1.76804                | 0.899535   | 0.0012041 | 0.0165938 |
| 9430008C03Rik_j5 | 0.230261  | 0.23281                | 0.015882   | 0.976873  | 0.993246  |
| Ptp1b_j2         | 0.492459  | 0.0234217              | 0          | 1         | 1         |
| Ptp1b            | 1.79704   | 1.61968                | 0          | 1         | 1         |
| XLOC_019314      | 0.0433133 | 0.304947               | 2.81568    | 0.189661  | 0.531545  |
| Jph2_j2          | 0.0686165 | 0.0226555              | -1.5987    | 0.349783  | 1         |
| Fitm2_j3         | 4.66996   | 9.18347                | 0          | 1         | 1         |
| Ada_j3           | 0         | 0.0768393 1.79769e+308 | 0.0935131  |           | 1         |
| Kcns1_j2         | 18.5735   | 10.3315                | -0.84619   | 1.78E-15  | 3.74E-13  |
| Kcns1_j1         | 2.62899   | 1.88999                | -0.476124  | 0.0660325 | 0.30674   |
| Slc35c2_j1       | 6.22035   | 5.5162                 | 0          | 1         | 1         |
| Zfp663           | 5.20E-05  | 0.338638               | 12.6682    | 0.906722  | 0.970429  |
| Zfp334_j3        | 1.18848   | 1.70557                | 0          | 1         | 1         |
| Slc13a3_j1       | 0         | 0.089141 1.79769e+308  | 0.0226353  |           | 1         |
| Zmynd8_j14       | 0.62358   | 1.36589                | 0          | 1         | 1         |
| Zmynd8_j16       | 0.219511  | 0.348737               | 0          | 1         | 1         |
| Sulf2            | 1.5113    | 1.66522                | 0          | 1         | 1         |
| Kcnc1_j5         | 6.72493   | 5.83257                | 0          | 1         | 1         |
| B4galt5_j2       | 0.668892  | 6.18128                | 0          | 1         | 1         |
| B4galt5_j4       | 5.03899   | 4.14104                | 0          | 1         | 1         |
| Spata2_j3        | 3.45827   | 5.28087                | 0          | 1         | 1         |
| Adnp_j2          | 1.23707   | 1.21618                | 0          | 1         | 1         |
| Kcng1_j2         | 0.0681632 | 0.297851               | 2.12753    | 0.0008048 | 0.0120371 |
| Atp9a_j7         | 0         | 0.137309               | 0          | 1         | 1         |
| Atp9a            | 10.0915   | 8.73032                | 0          | 1         | 1         |

|                |           |           |              |           |           |
|----------------|-----------|-----------|--------------|-----------|-----------|
| Aurka_j1       | 0.0958579 | 1.7193    | 0            | 1         | 1         |
| Zbp1           | 0.0961289 | 0.331181  | 1.78458      | 0.0158072 | 0.11926   |
| Ppp4r1l-ps_j5  | 1.03023   | 0.960129  | 0            | 1         | 1         |
| Ppp4r1l-ps_j4  | 0.165222  | 0.233732  | 0            | 1         | 1         |
| Ppp4r1l-ps_j10 | 0.0909613 | 0.228811  | 0            | 1         | 1         |
| XLOC_019397    | 1.28511   | 1.08604   | -0.242818    | 0.513912  | 0.793006  |
| XLOC_019397    | 0.278522  | 0.259736  | -0.100744    | 0.903127  | 0.969087  |
| Sycp2_j4       | 0         | 0.0673307 | 1.79769e+308 | 0.172212  | 1         |
| Taf4a_j1       | 0.693856  | 0.745577  | 0            | 1         | 1         |
| Taf4a          | 0.468962  | 0.615272  | 0            | 1         | 1         |
| Psm7_j2        | 2.14863   | 5.31147   | 0            | 1         | 1         |
| Hrh3_j1        | 0         | 0.514329  | 1.79769e+308 | 4.52E-06  | 0.0001543 |
| Lama5_j4       | 0.142686  | 0.42341   | 1.56921      | 1.44E-08  | 9.80E-07  |
| Cables2_j3     | 0.0373757 | 0.229046  | 0            | 1         | 1         |
| Cables2_j2     | 0.0478441 | 0.0879802 | 0            | 1         | 1         |
| Tcf15          | 0.148007  | 0.317794  | 1.10243      | 0.0393541 | 0.221621  |
| Dido1_j3       | 0.705777  | 0.672308  | 0            | 1         | 1         |
| Chrna4_j1      | 0         | 0.300192  | 1.79769e+308 | 3.16E-06  | 0.000114  |
| Kcnq2_j1       | 4.62224   | 5.40197   | 0            | 1         | 1         |
| Kcnq2_j2       | 0.696518  | 0.427457  | 0            | 1         | 1         |
| BC006779_j4    | 1.14449   | 1.45277   | 0.344096     | 0.191927  | 0.534088  |
| BC006779       | 0.0596082 | 0.124034  | 1.05716      | 0.0301144 | 1         |
| Znf512b_j7     | 3.38994   | 3.57928   | 0            | 1         | 1         |
| Znf512b_j8     | 0.146678  | 0.119801  | 0            | 1         | 1         |
| Rgs19          | 1.2291    | 1.82569   | 0            | 1         | 1         |
| Fam171a1_j2    | 0         | 0.993309  | 0            | 1         | 1         |
| Nmt2_j2        | 1.523     | 1.40861   | 0            | 1         | 1         |
| Nudt5_j3       | 0.0395483 | 0.0475173 | 0.264836     | 0.630251  | 1         |
| Usp6nl_j4      | 0         | 0.967745  | 0            | 1         | 1         |
| Kin            | 5.5332    | 6.96594   | 0.332202     | 0.0298175 | 0.184928  |
| Itih5_j1       | 0.544659  | 1.25949   | 1.20942      | 2.09E-08  | 1.38E-06  |
| Il15ra         | 0.608223  | 0.910355  | 0.581828     | 0.251872  | 0.59988   |
| Il15ra_j7      | 0.503666  | 0.522138  | 0.0519645    | 0.931483  | 0.979142  |
| Ankrd16_j8     | 0.0832346 | 0.0962668 | 0            | 1         | 1         |
| Ankrd16_j11    | 0.500285  | 0.398198  | 0            | 1         | 1         |
| Vim_j4         | 0.320584  | 1.03772   | 1.69464      | 0.0002523 | 0.0046543 |
| Vim_j5         | 0         | 1.13945   | 1.79769e+308 | 8.28E-05  | 0.0018274 |
| Cacnb2_j4      | 0.399861  | 0.216796  | -0.883157    | 0.0500063 | 0.258405  |
| Plxdc2_j1      | 1.17614   | 1.19319   | 0.0207615    | 0.942257  | 0.982456  |
| Mllt10_j2      | 0.376092  | 0.467215  | 0.313001     | 0.427709  | 0.741858  |
| BC061194_j2    | 0.102108  | 0.125632  | 0.299111     | 0.798552  | 1         |
| BC061194_j8    | 0.0221598 | 0.0794401 | 1.84192      | 0.332726  | 1         |
| AK076779_j9    | 0.0576522 | 0.22859   | 1.98731      | 0.0613376 | 0.292429  |
| Etl4_j7        | 0.407066  | 0.372602  | 0            | 1         | 1         |
| Etl4_j8        | 0.839666  | 1.55012   | 0            | 1         | 1         |
| Etl4_j11       | 0.221176  | 0.221144  | 0            | 1         | 1         |
| XLOC_017912    | 0.0763214 | 0.0916783 | 0.264492     | 0.781999  | 1         |

|               |           |           |              |           |           |
|---------------|-----------|-----------|--------------|-----------|-----------|
| Apbb1ip_j1    | 0         | 0.0527542 | 1.79769e+308 | 0.0825978 | 1         |
| Yme1l1_j2     | 7.44683   | 6.38635   | 0            | 1         | 1         |
| Il1rn         | 0.0349358 | 0.117122  | 1.74524      | 0.258024  | 1         |
| Psd4_j3       | 0         | 0.122666  | 1.79769e+308 | 0.0004181 | 1         |
| Pnpla7_j1     | 0         | 0.0755887 | 1.79769e+308 | 0.0053944 | 1         |
| Nelf_j1       | 0.111691  | 0.146339  | 0            | 1         | 1         |
| Entpd2        | 14.0757   | 15.3      | 0.12032      | 0.293009  | 0.640079  |
| Abca2_j2      | 0.0725562 | 0.15374   | 1.08332      | 0.0169426 | 1         |
| Abca2_j10     | 11.1909   | 14.1822   | 0.341752     | 0.0036917 | 0.0405533 |
| Kcnt1_j7      | 4.13439   | 2.81012   | 0            | 1         | 1         |
| Adamts12_j4   | 0.449044  | 0.120102  | -1.9026      | 0.0116497 | 0.095923  |
| Adamts12_j7   | 0         | 0.0915067 | 1.79769e+308 | 0.049844  | 1         |
| BC050122_j1   | 0         | 0.0854066 | 1.79769e+308 | 0.0771332 | 1         |
| Tsc1_j5       | 3.10657   | 2.34119   | 0            | 1         | 1         |
| Ddx31_j3      | 2.46148   | 2.25275   | 0            | 1         | 1         |
| Ttf1_j5       | 0.0824335 | 0.242418  | 1.55619      | 0.0154916 | 0.117492  |
| Rapgef1_j6    | 0.127326  | 0.0930633 | 0            | 1         | 1         |
| Slc27a4_j1    | 0.320172  | 0.227142  | 0            | 1         | 1         |
| Urm1_j1       | 24.6054   | 22.1588   | 0            | 1         | 1         |
| Urm1_j2       | 1.69352   | 1.10746   | 0            | 1         | 1         |
| Odf2_j11      | 0.083283  | 0.101698  | 0.288199     | 0.737979  | 1         |
| Odf2_j12      | 0.80685   | 0.72076   | -0.16278     | 0.586739  | 0.834589  |
| Spna2_j1      | 37.8123   | 40.2942   | 0            | 1         | 1         |
| Spna2_j10     | 12.5588   | 27.4427   | 0            | 1         | 1         |
| Set_j3        | 7.95883   | 8.22345   | 0            | 1         | 1         |
| Lrrc8a_j1     | 7.43441   | 12.8925   | 0            | 1         | 1         |
| Nup188_j2     | 0.479229  | 0.819664  | 0            | 1         | 1         |
| Ppp2r4_j1     | 3.55872   | 3.34649   | 0            | 1         | 1         |
| Ppp2r4_j2     | 2.53352   | 1.25345   | 0            | 1         | 1         |
| Ppp2r4_j5     | 0.245796  | 0.596654  | 0            | 1         | 1         |
| Ppp2r4_j8     | 6.97203   | 0         | 0            | 1         | 1         |
| Mettl11a_j2   | 0.190919  | 0.150219  | -0.345889    | 0.396336  | 0.721081  |
| Ass1_j3       | 0         | 0.0687585 | 1.79769e+308 | 0.194421  | 1         |
| Fubp3_j1      | 0.781354  | 0.768058  | 0            | 1         | 1         |
| Fubp3_j4      | 2.10126   | 1.67164   | 0            | 1         | 1         |
| Prdm12_j3     | 0         | 0.549429  | 0            | 1         | 1         |
| Ciz1_j4       | 0.0775256 | 0.240208  | 0            | 1         | 1         |
| Ptges2_j5     | 0.278782  | 0.297365  | 0.0930947    | 0.917018  | 0.97399   |
| St6galnac4_j1 | 1.36998   | 2.17314   | 0.665631     | 0.028099  | 0.177892  |
| St6galnac6_j3 | 1.4991    | 1.39671   | -0.10207     | 0.789009  | 0.929615  |
| St6galnac6    | 0.130158  | 0.206774  | 0.667798     | 0.523192  | 0.799177  |
| Sh2d3c_j4     | 3.73863   | 4.22547   | 0            | 1         | 1         |
| Fam129b_j1    | 5.96295   | 8.44322   | 0            | 1         | 1         |
| Gsn_j1        | 0.0333711 | 0.142828  | 0            | 1         | 1         |
| Gsn_j2        | 0         | 0.142828  | 0            | 1         | 1         |
| Mrrf_j1       | 0.0393469 | 0.137612  | 0            | 1         | 1         |
| Rabgap1_j1    | 0.111947  | 0.640933  | 0            | 1         | 1         |

|             |             |           |              |           |           |
|-------------|-------------|-----------|--------------|-----------|-----------|
| Arhgap15_j6 | 0           | 0.079517  | 1.79769e+308 | 0.128925  | 1         |
| XLOC_018060 | 0.204063    | 0.181515  |              | 0 1       | 1         |
| Kif5c_j2    | 0.11017     | 0.126762  |              | 0 1       | 1         |
| Kif5c_j7    | 65.4983     | 66.4079   |              | 0 1       | 1         |
| Lypd6b_j4   | 0.277679    | 0.388978  | 0.48627      | 0.370284  | 0.703609  |
| Rif1_j2     | 0.0654157   | 0.0979078 | 0.581786     | 0.283341  | 1         |
| Rif1_j10    | 0.0543859   | 0.0948735 | 0.802774     | 0.2307    | 1         |
| Fmnl2_j1    | 2.2254      | 1.93383   | -0.202605    | 0.292553  | 0.639555  |
| Fmnl2_j5    | 4.24146     | 4.29896   | 0.0194259    | 0.923245  | 0.976086  |
| XLOC_018078 | 0.266781    | 0.152271  | -0.809017    | 0.321533  | 0.664637  |
| Galnt13_j6  | 0           | 0.0720354 | 1.79769e+308 | 0.0075954 | 1         |
| AK036371_j1 | 0.0342185   | 0.148681  | 2.11937      | 0.0776034 | 1         |
| Kcnj3_j1    | 0.083479    | 0.181538  | 0            | 1         | 1         |
| Upp2_j12    | 0.0580472   | 0.547918  | 3.23866      | 6.31E-05  | 0.0014558 |
| Upp2_j13    | 0.154031    | 0.0104391 | -3.88315     | 0.0195675 | 0.138914  |
| Pkp4_j3     | 0.280749    | 0.244938  | -0.196864    | 0.673492  | 0.876948  |
| AK050909_j4 | 0.0892755   | 0.0762918 | -0.226737    | 0.862648  | 1         |
| Slc4a10_j8  | 0.382376    | 0.40816   | 0.0941434    | 0.862788  | 0.956568  |
| Gca_j1      | 4.88888     | 3.69115   | 0            | 1         | 1         |
| XLOC_018100 | 0.193331    | 0.106381  | -0.861836    | 0.123745  | 0.438193  |
| Csrnp3_j3   | 0.0379701   | 0.108123  | 0            | 1         | 1         |
| XLOC_018110 | 0.0816129   | 0.0521682 | -0.645627    | 0.575662  | 1         |
| Lass6_j1    | 5.29E-05    | 0.340864  | 12.6534      | 0.819482  | 0.941524  |
| Phospho2_j1 | 2.65647     | 2.51886   | 0            | 1         | 1         |
| Dync1i2_j3  | 6.67967     | 5.79408   | 0            | 1         | 1         |
| Dync1i2_j6  | 1.0825      | 0.660337  | 0            | 1         | 1         |
| Pdk1_j3     | 0           | 0.224793  | 0            | 1         | 1         |
| XLOC_018152 | 0.11898     | 0.083176  | -0.516481    | 0.516459  | 1         |
| Osbpl6_j4   | 3.39077     | 3.16911   | 0            | 1         | 1         |
| Plekha3_j3  | 1.96686     | 4.91621   | 1.32165      | 7.43E-07  | 3.21E-05  |
| Ube2e3_j4   | 16.236      | 15.7826   | 0            | 1         | 1         |
| Ube2e3_j7   | 0.0222302   | 0.286644  | 0            | 1         | 1         |
| Zfp804a_j2  | 0.908669    | 1.64174   | 0            | 1         | 1         |
| Fam171b_j1  | 1.90515     | 2.93687   | 0            | 1         | 1         |
| Tnks1bp1_j3 | 2.15309     | 3.14928   | 0.54861      | 0.000399  | 0.0067558 |
| Tnks1bp1_j4 | 0           | 0.408861  | 1.79769e+308 | 2.78E-07  | 1.33E-05  |
| Tnks1bp1_j7 | 0           | 0.191526  | 1.79769e+308 | 0.0010899 | 0.0152782 |
| Mtch2_j2    | 29.2219     | 30.3876   | 0            | 1         | 1         |
| Kbtbd4      | 0.356945    | 0.349443  | -0.0306445   | 0.918745  | 0.974658  |
| Lrp4_j7     | 0.0784268   | 0.17716   | 1.17564      | 0.0345313 | 0.203985  |
| Lrp4_j10    | 0           | 0.122038  | 1.79769e+308 | 0.009768  | 1         |
| Phf21a_j9   | 0.0924352   | 0.491771  | 0            | 1         | 1         |
| Phf21a_j15  | 0.0853841   | 0.173577  | 0            | 1         | 1         |
| Chst1_j3    | 0.000338957 | 0.238087  | 0            | 1         | 1         |
| Trp53i11_j1 | 0.464169    | 1.29728   | 0            | 1         | 1         |
| Trp53i11    | 0.253256    | 1.0726    | 0            | 1         | 1         |
| Cd59a_j2    | 0           | 0.0770205 | 0            | 1         | 1         |



|                  |           |           |              |           |           |
|------------------|-----------|-----------|--------------|-----------|-----------|
| AK015665_j5      | 0         | 0.0585964 | 1.79769e+308 | 0.0404737 | 1         |
| Wt1_j1           | 0.0539745 | 0.0931861 | 0.787837     | 0.506156  | 1         |
| 0610012H03Rik    | 0.101648  | 0.190204  | 0.903968     | 0.448722  | 0.755217  |
| XLOC_018249      | 0.0725524 | 0.147059  | 1.0193       | 0.564977  | 1         |
| Mpped2_j3        | 0.368186  | 0.546523  | 0            | 1         | 1         |
| Mpped2_j6        | 0         | 0.518506  | 0            | 1         | 1         |
| Kif18a_j2        | 0         | 0.0694151 | 1.79769e+308 | 0.050652  | 1         |
| Bdnf             | 1.74338   | 2.06599   | 0            | 1         | 1         |
| Lgr4_j1          | 1.49355   | 2.03843   | 0            | 1         | 1         |
| Thbs1            | 0.0502058 | 0.0348697 | -0.525877    | 0.59898   | 1         |
| XLOC_018295      | 0.0235694 | 0.100851  | 2.09724      | 0.415223  | 1         |
| Bahd1_j2         | 4.07209   | 3.66539   | -0.151801    | 0.301971  | 0.648141  |
| Spint1_j2        | 1.24E-05  | 0.168509  | 13.726       | 0.98625   | 0.995937  |
| Spint1_j1        | 0         | 0.230037  | 1.79769e+308 | 0.0031545 | 0.0358897 |
| XLOC_018309      | 0.294572  | 0.369022  | 0.325086     | 0.488675  | 0.779261  |
| 1700020114Rik_j3 | 10.1097   | 8.80884   | -0.198713    | 0.135116  | 0.457301  |
| Nusap1_j1        | 0.527206  | 0.623319  | 0.241604     | 0.374786  | 0.707307  |
| Itpka            | 0.135326  | 0.129373  | -0.0648999   | 0.916722  | 1         |
| Mga_j2           | 0.427131  | 0.314067  | -0.443606    | 0.067636  | 0.31119   |
| Mga_j7           | 1.5143    | 1.35157   | -0.164011    | 0.295428  | 0.642035  |
| Mapkbp1_j12      | 0.408064  | 0.897239  | 1.13669      | 0.027269  | 0.174471  |
| Pla2g4b_j1       | 0.129509  | 0.258866  | 0.999151     | 0.0547883 | 0.273012  |
| Pla2g4b_j9       | 0.204995  | 0.246102  | 0.263665     | 0.609625  | 0.846288  |
| Pla2g4b_j12      | 0.0936947 | 0.317282  | 1.75972      | 0.0122921 | 0.0999302 |
| Capn3_j4         | 0.0482585 | 0.114711  | 1.24915      | 0.310566  | 1         |
| XLOC_018324      | 0.0242176 | 0.131183  | 0            | 1         | 1         |
| XLOC_018324      | 0.36804   | 0.270023  | 0            | 1         | 1         |
| mKIAA1300_j3     | 0.316457  | 0.286739  | 0            | 1         | 1         |
| mKIAA1300_j4     | 0.264527  | 0.274601  | 0            | 1         | 1         |
| Ccndbp1_j1       | 0.54353   | 0.734951  | 0.435289     | 0.440919  | 0.749828  |
| Adal_j3          | 2.69364   | 2.65663   | -0.0199597   | 0.925531  | 0.976854  |
| Mtap1a_j1        | 11.6626   | 6.04305   | 0            | 1         | 1         |
| 2310003F16Rik_j1 | 1.45264   | 1.76897   | 0.284234     | 0.0621166 | 0.295046  |
| 2310003F16Rik_j2 | 0.281134  | 0.954665  | 1.76374      | 1.40E-10  | 1.38E-08  |
| Wdr76_j1         | 0         | 0.0505422 | 1.79769e+308 | 0.0440374 | 1         |
| Wdr76            | 0.472721  | 0.139513  | -1.76059     | 0.0005144 | 0.008334  |
| Wdr76_j2         | 6.38E-05  | 0.354603  | 12.4402      | 0.870581  | 0.958745  |
| Ctdspl2_j9       | 0         | 0.428653  | 1.79769e+308 | 3.03E-07  | 1.44E-05  |
| Sqrdl_j1         | 0.568656  | 0.561973  | -0.0170544   | 0.976807  | 0.993246  |
| Sema6d_j1        | 0.97416   | 1.2627    | 0            | 1         | 1         |
| Dut_j1           | 13.8034   | 15.1133   | 0.130796     | 0.507353  | 0.789639  |
| Galk2_j3         | 1.60147   | 1.24384   | 0            | 1         | 1         |
| Galk2_j4         | 2.88638   | 3.20764   | 0            | 1         | 1         |
| Fgf7_j1          | 0         | 0.253438  | 1.79769e+308 | 0.0027047 | 0.0317962 |
| Usp8_j3          | 0.130285  | 0.0915892 | 0            | 1         | 1         |
| Snrnp200_j1      | 4.70044   | 5.09245   | 0            | 1         | 1         |
| Snrnp200_j4      | 9.41595   | 9.43233   | 0            | 1         | 1         |

|                  |             |           |               |           |           |
|------------------|-------------|-----------|---------------|-----------|-----------|
| Mrps5_j3         | 3.19422     | 4.04944   | 0.342259      | 0.236404  | 0.583594  |
| Mrps5_j5         | 2.43654     | 2.01829   | -0.271704     | 0.156314  | 0.4898    |
| XLOC_018370      | 0.0811485   | 0.175925  | 1.11632       | 0.317175  | 0.66048   |
| Sirpa_j3         | 1.6299      | 2.10033   | 0.36583       | 0.135361  | 0.457747  |
| Nop56_j3         | 2.76447     | 2.86674   | 0.0524066     | 0.680561  | 0.879921  |
| XLOC_018386      | 0.086286    | 0.125048  | 0.535288      | 0.525338  | 1         |
| XLOC_018386      | 0.139435    | 0.183297  | 0.394586      | 0.357724  | 0.693571  |
| Ebf3_j3          | 0.107123    | 0.297246  | 0             | 1         | 1         |
| Ebf3_j2          | 0.589283    | 1.09959   | 0             | 1         | 1         |
| XLOC_018390      | 0.0999265   | 0.137759  | 0             | 1         | 1         |
| Vps16_j3         | 0.342419    | 0.466022  | 0             | 1         | 1         |
| XLOC_018390      | 0.134805    | 0.163768  | 0             | 1         | 1         |
| Cdc25b_j3        | 0.450404    | 0.349739  | -0.364943     | 0.516899  | 0.795275  |
| Pank2_j2         | 0.136846    | 0.159758  | 0.223339      | 0.581911  | 0.832581  |
| Gm14051          | 0.1152      | 0.206029  | 0             | 1         | 1         |
| Chgb_j2          | 6.91336     | 7.93605   | 0.199035      | 0.188866  | 0.530536  |
| Chgb_j3          | 0.142674    | 0.112344  | -0.34479      | 0.653051  | 0.867264  |
| Plcb1_j2         | 0.539137    | 0.965457  | 0             | 1         | 1         |
| 6330527006Rik_j1 | 0.0152528   | 0.0561118 | 1.87923       | 0.42476   | 1         |
| Btd3_j2          | 0.155793    | 0.312052  | 0             | 1         | 1         |
| Macro2_j6        | 0.26438     | 0.165713  | -0.673925     | 0.337933  | 0.678515  |
| Macro2_j11       | 3.28033     | 2.70683   | -0.277235     | 0.101281  | 0.3941    |
| Macro2_j13       | 0.342668    | 0.185532  | -0.885142     | 0.0873187 | 0.361539  |
| Macro2_j19       | 0.000325276 | 0.737251  | 11.1463       | 0.495241  | 0.782763  |
| Dstn_j3          | 77.8621     | 77.59     | 0             | 1         | 1         |
| LOC668917_j6     | 0.295654    | 0.39506   | 0.418161      | 0.394623  | 0.719811  |
| Sec23b           | 3.87608     | 3.78078   | 0             | 1         | 1         |
| Naa20            | 1.90137     | 1.41258   | -0.428713     | 0.0640135 | 0.300252  |
| Cst11_j10        | 0           | 0.0955371 | 0             | 1         | 1         |
| Fkbp1a_j3        | 193.885     | 232.822   | 0.264027      | 0.0021321 | 0.0262697 |
| 5430405G05Rik_j7 | 0.784486    | 1.74261   | 1.15143       | 0.0123299 | 0.100153  |
| Scrt2_j4         | 32.7225     | 31.9071   | -0.0364065    | 0.694573  | 0.887364  |
| Tbc1d20_j1       | 0           | 0.100862  | 0             | 1         | 1         |
| Tpx2             | 0.152623    | 0.16764   | 0.135399      | 0.804829  | 0.935454  |
| Tpx2             | 0.0451825   | 0.0985438 | 1.125         | 0.188255  | 1         |
| Xkr7_j2          | 0.214987    | 0.117985  | 0             | 1         | 1         |
| BC020535_j6      | 0.0538845   | 0.38541   | 2.83845       | 0.0298084 | 0.184895  |
| XLOC_018486      | 0           | 0.116305  | 1.79769e+308  | 0.0939542 | 1         |
| Cbfa2t2_j3       | 0.156931    | 0.309949  | 0             | 1         | 1         |
| Cbfa2t2_j2       | 1.3272      | 1.34367   | 0             | 1         | 1         |
| Zfp341_j4        | 0.665447    | 1.13559   | 0.771048      | 0.0724647 | 0.323898  |
| Raly_j5          | 0           | 0.210431  | 1.79769e+308  | 0.0340734 | 0.202163  |
| Raly_j6          | 1.5387      | 6.67805   | 2.11772       | 4.26E-14  | 7.47E-12  |
| Trp53inp2_j1     | 0.733321    | 0         | -1.79769e+308 | 0.0066112 | 0.0629702 |
| Acss2            | 0.795934    | 0.794126  | 0             | 1         | 1         |
| Myh7b_j7         | 0.119544    | 0.0286795 | 0             | 1         | 1         |
| Cep250_j4        | 0           | 0.0540921 | 0             | 1         | 1         |

|                  |           |           |              |           |           |
|------------------|-----------|-----------|--------------|-----------|-----------|
| XLOC_018506      | 1.03252   | 1.36544   | 0.403185     | 0.39668   | 0.721313  |
| Phf20            | 5.89879   | 5.58413   | 0            | 1         | 1         |
| Phf20_j1         | 0.413758  | 0.309582  | 0            | 1         | 1         |
| Epb4.1l1_j5      | 0.87264   | 0.958817  | 0            | 1         | 1         |
| 0610011L14Rik_j3 | 9.47184   | 9.11996   | -0.0546167   | 0.610667  | 0.846532  |
| Dlgap4_j1        | 0.606598  | 1.26989   | 1.0659       | 0.0033167 | 0.0373028 |
| Rpn2_j3          | 1.07685   | 1.44398   | 0            | 1         | 1         |
| Rpn2_j4          | 0.0410361 | 0.209401  | 0            | 1         | 1         |
| Src              | 1.71391   | 2.5955    | 0            | 1         | 1         |
| Ralgapb_j4       | 0         | 0.208559  | 1.79769e+308 | 1.58E-06  | 6.13E-05  |
| Actr5_j5         | 0.953651  | 1.2817    | 0.426523     | 0.27567   | 0.624585  |
| Fam83d_j1        | 0.521219  | 0.627714  | 0.268218     | 0.523603  | 0.799432  |
| Top1_j2          | 4.33542   | 5.22502   | 0.269265     | 0.164007  | 0.499741  |
| XLOC_018538      | 0.144696  | 0.103638  | -0.481476    | 0.69584   | 0.887819  |
| 9430021M05Rik_j4 | 0.0815479 | 0.129715  | 0.669621     | 0.45962   | 1         |
| Gm14246_j2       | 8.51E-06  | 0.307947  | 15.1437      | 0.983779  | 0.995196  |
| Srsf6_j3         | 15.0906   | 15.1581   | 0            | 1         | 1         |
| L3mbtl_j4        | 0.26778   | 0.249333  | -0.102973    | 0.826534  | 0.944076  |
| Mybl2_j1         | 0.0907139 | 0.146618  | 0.692665     | 0.334435  | 1         |
| AK082432_j1      | 0.143696  | 0.27393   | 0.930787     | 0.071475  | 0.321458  |
| XLOC_018549      | 0.197239  | 0.262737  | 0.413677     | 0.425366  | 0.740539  |
| XLOC_018552      | 0.0062163 | 0.0685822 | 3.46371      | 0.300443  | 1         |
| 1810053B01Rik    | 0         | 0.212152  | 1.79769e+308 | 0.046935  | 0.24858   |
| Stk4_j3          | 0.0424646 | 0.466522  | 0            | 1         | 1         |
| Dbndd2_j1        | 2.18924   | 4.93395   | 0            | 1         | 1         |
| Snx21_j5         | 5.31914   | 9.49372   | 0            | 1         | 1         |
| Eya2_j1          | 0.164691  | 0.325692  | 0.983752     | 0.136325  | 0.459356  |
| Gm14291_j1       | 0.246337  | 0.25298   | 0.0383897    | 0.902389  | 0.968814  |
| Slc9a8_j3        | 1.36865   | 0.625265  | -1.13021     | 0.0083189 | 0.0747414 |
| Rnf114_j3        | 6.67853   | 6.05874   | 0            | 1         | 1         |
| AK027991_j1      | 0.354659  | 0.355803  | 0.00464702   | 0.991734  | 0.997561  |
| Pard6b_j1        | 0         | 0.180597  | 0            | 1         | 1         |
| Pard6b_j2        | 0.919691  | 0.596434  | 0            | 1         | 1         |
| XLOC_018599      | 0.105094  | 0.129254  | 0.298531     | 0.801578  | 1         |
| Tshz2_j2         | 0.165711  | 4.01789   | 0            | 1         | 1         |
| XLOC_018605      | 0.0446347 | 0.112381  | 1.33216      | 0.194084  | 1         |
| Pfdn4_j2         | 30.81     | 34.7235   | 0.172513     | 0.271077  | 0.620091  |
| Dok5_j1          | 1.73986   | 2.17693   | 0.323321     | 0.252135  | 0.600172  |
| XLOC_018612      | 0.078472  | 0.140326  | 0.838535     | 0.527207  | 1         |
| 2410001C21Rik_j4 | 0.89612   | 1.49461   | 0            | 1         | 1         |
| Vapb_j4          | 0.266125  | 0.251555  | -0.081235    | 0.843896  | 0.950627  |
| Vapb_j5          | 85.4701   | 86.8735   | 0.0234953    | 0.790442  | 0.930178  |
| BC086906_j2      | 1.4306    | 1.10264   | -0.375661    | 0.0811898 | 0.346922  |
| Etohi1_j1        | 0.310636  | 0.421035  | 0.438713     | 0.659377  | 0.870718  |
| 9030418K01Rik_j3 | 6.06198   | 5.18627   | 0            | 1         | 1         |
| Ss18l1_j1        | 3.01805   | 3.52277   | 0            | 1         | 1         |
| Slco4a1_j12      | 0         | 0.336354  | 1.79769e+308 | 0.0129903 | 0.104077  |

|                  |             |            |              |           |           |
|------------------|-------------|------------|--------------|-----------|-----------|
| 1600027N09Rik_j1 | 0.273633    | 0.477198   | 0            | 1         | 1         |
| Col20a1_j1       | 0.11044     | 0.117259   | 0.0864337    | 0.875609  | 1         |
| Col20a1_j7       | 0.0708722   | 0.159612   | 1.17127      | 0.28185   | 0.630397  |
| Col20a1_j10      | 0           | 0.128219   | 1.79769e+308 | 0.0218235 | 1         |
| Col20a1_j13      | 0           | 0.0471492  | 1.79769e+308 | 0.116722  | 1         |
| Zgpat_j11        | 1.5099      | 1.84322    | 0            | 1         | 1         |
| Prpf6_j1         | 1.34329     | 2.49619    | 0            | 1         | 1         |
| XLOC_018666      | 0.0666494   | 0.100358   | 0.590492     | 0.584146  | 1         |
| Tcea2_j6         | 9.15533     | 7.10812    | 0            | 1         | 1         |
| Myt1_j1          | 0.203224    | 0.119974   | -0.760351    | 0.0194826 | 0.138412  |
| Myt1_j8          | 4.19953     | 4.31214    | 0.0381764    | 0.749093  | 0.912835  |
| Myt1_j13         | 0.957719    | 0.675941   | -0.502706    | 0.001615  | 0.0209917 |
| Meig1_j1         | 0           | 0.0921861  | 0            | 1         | 1         |
| Hspa14_j1        | 0           | 0.194691   | 1.79769e+308 | 0.0221211 | 0.151056  |
| Camk1d_j2        | 0           | 0.189916   | 0            | 1         | 1         |
| 5430407P10Rik_j3 | 0.238564    | 0.173875   | -0.456321    | 0.430494  | 0.743178  |
| 5430407P10Rik_j4 | 1.25E-05    | 0.141177   | 13.4598      | 0.977387  | 1         |
| Celf2_j8         | 0.448275    | 0.00119432 | 0            | 1         | 1         |
| Atp5c1_j2        | 72.6579     | 70.8885    | -0.0355683   | 0.713684  | 0.896209  |
| Pfkfb3_j2        | 8.55043     | 13.5433    | 0            | 1         | 1         |
| Fam188a_j4       | 1.70128     | 1.62589    | 0            | 1         | 1         |
| Fam188a_j3       | 10.5519     | 10.2243    | 0            | 1         | 1         |
| Trdmt1_j1        | 0.429889    | 0.490385   | 0.189951     | 0.587791  | 0.835082  |
| Trdmt1_j2        | 0           | 0.0607925  | 1.79769e+308 | 0.0357688 | 1         |
| Ptpla_j2         | 0.011267    | 0.0546678  | 2.27858      | 0.179114  | 1         |
| Nsun6_j7         | 0.790399    | 1.00735    | 0.349918     | 0.276609  | 0.625543  |
| Nabl_j5          | 0.143576    | 0.398934   | 1.47433      | 0.0133633 | 0.106021  |
| Arhgap21_j2      | 0.000298739 | 0.646311   | 0            | 1         | 1         |
| Gm13340          | 75.6499     | 69.2401    | -0.12773     | 0.149339  | 0.478596  |
| Cacna1b_j2       | 0.67496     | 0.737635   | 0            | 1         | 1         |
| Cacna1b_j1       | 1.39234     | 1.19987    | 0            | 1         | 1         |
| Cacna1b_j4       | 0.591158    | 0.652862   | 0            | 1         | 1         |
| Ehmt1_j9         | 0.708982    | 0.853769   | 0.268098     | 0.472725  | 0.769673  |
| Ehmt1_j10        | 1.10496     | 1.14096    | 0.0462536    | 0.877532  | 0.96086   |
| Ehmt1_j11        | 0.000156321 | 0.805984   | 12.332       | 0.610935  | 0.84666   |
| Ehmt1            | 0.518399    | 0.640592   | 0.305343     | 0.300338  | 0.646972  |
| A830007P12Rik_j2 | 0.0140696   | 0.300411   | 4.41629      | 0.0013402 | 0.0180811 |
| Ndor1_j3         | 0           | 0.223511   | 0            | 1         | 1         |
| Ndor1_j4         | 1.02697     | 1.237      | 0            | 1         | 1         |
| Ndor1_j5         | 0.49306     | 0.426536   | 0            | 1         | 1         |
| Ndor1_j6         | 0           | 0.0593919  | 0            | 1         | 1         |
| Grin1_j5         | 1.58678     | 1.1173     | -0.506084    | 0.0600608 | 0.288627  |
| Dpp7_j1          | 9.30142     | 9.6475     | 0            | 1         | 1         |
| Dpp7_j2          | 1.85457     | 1.89079    | 0            | 1         | 1         |
| C8g_j1           | 0           | 0.107067   | 1.79769e+308 | 0.0607778 | 1         |
| Mamdc4_j1        | 0.0418896   | 0.0790435  | 0.916056     | 0.251295  | 1         |
| Mamdc4_j3        | 0           | 0.0789655  | 1.79769e+308 | 0.0588645 | 1         |

|                  |           |           |              |           |           |
|------------------|-----------|-----------|--------------|-----------|-----------|
| Mamdc4_j4        | 0         | 0.062732  | 1.79769e+308 | 0.0840799 | 1         |
| Phpt1_j4         | 0         | 0.199186  | 1.79769e+308 | 8.03E-05  | 0.0017797 |
| B230208H17Rik_j3 | 3.97734   | 4.91553   |              | 0         | 1         |
| B230208H17Rik_j5 | 4.22815   | 4.82113   |              | 0         | 1         |
| Camsap1_j9       | 0.383563  | 0.342641  |              | 0         | 1         |
| Card9_j5         | 0.107771  | 0.14584   |              | 0         | 1         |
| Snpc4_j1         | 0.931201  | 1.05415   |              | 0         | 1         |
| Inpp5e_j1        | 0.0779566 | 0.0638591 |              | 0         | 1         |
| Notch1_j3        | 4.13288   | 5.05538   | 0.290674     | 0.042114  | 0.231937  |
| Tmem8c_j1        | 0         | 0.0862437 | 1.79769e+308 | 0.0993812 | 1         |
| Gm13399_j2       | 0.0403597 | 0.132073  | 1.71035      | 0.197726  | 1         |
| Sardh_j2         | 0         | 0.108835  | 1.79769e+308 | 0.0431506 | 1         |
| Brd3_j4          | 0.0177197 | 0.66749   | 0            | 1         | 1         |
| Brd3_j5          | 0         | 0.0529204 | 0            | 1         | 1         |
| Gm13373_j1       | 0.0276618 | 0.0470071 | 0.764984     | 0.437512  | 1         |
| Ntng2_j5         | 0.897333  | 1.04938   | 0            | 1         | 1         |
| XLOC_018793      | 0.0861972 | 0.158648  | 0.880115     | 0.327156  | 0.670083  |
| Zer1_j3          | 8.12337   | 9.23969   | 0            | 1         | 1         |
| D2Wsu81e_j1      | 5.26927   | 5.51521   | 0            | 1         | 1         |
| Ccbl1_j3         | 0.0822211 | 0.110265  | 0.423395     | 0.725088  | 1         |
| 1700001O22Rik_j2 | 0.0168149 | 0.21653   | 3.68675      | 0.195151  | 0.537411  |
| Asb6_j1          | 8.90769   | 10.5679   | 0.246571     | 0.0831301 | 0.351361  |
| Fnbp1_j2         | 10.9506   | 8.61028   | 0            | 1         | 1         |
| Fnbp1_j5         | 1.49894   | 5.68782   | 0            | 1         | 1         |
| Dnm1_j7          | 18.824    | 19.284    | 0            | 1         | 1         |
| Dnm1_j16         | 14.6255   | 10.0397   | 0            | 1         | 1         |
| Cdk9_j2          | 1.00239   | 1.66613   | 0.733058     | 0.0231703 | 0.155908  |
| Ttc16_j1         | 0.0773519 | 0.0673951 | -0.198793    | 0.855438  | 1         |
| Lrsam1_j3        | 1.70396   | 2.05695   | 0            | 1         | 1         |
| Slc2a8_j3        | 0.329834  | 0.752168  | 0            | 1         | 1         |
| Slc2a8_j2        | 2.74547   | 1.41394   | 0            | 1         | 1         |
| Fam125b_j1       | 5.28538   | 6.6696    | 0            | 1         | 1         |
| Pbx1             | 0.186954  | 0.848359  | 0            | 1         | 1         |
| Gapvd1_j11       | 0.368888  | 0.238676  | 0            | 1         | 1         |
| Rabepk_j1        | 0.854201  | 0.878405  | 0            | 1         | 1         |
| Psm5_j2          | 14.5988   | 13.4727   | -0.115802    | 0.258152  | 0.606767  |
| Traf1            | 1.85E-05  | 0.451501  | 14.5785      | 0.978065  | 0.993721  |
| Traf1_j6         | 0.198726  | 0.271814  | 0.451838     | 0.428425  | 0.742311  |
| Hc_j4            | 0.127541  | 0.181933  | 0.512453     | 0.627489  | 0.854629  |
| Rab14_j6         | 0.0212344 | 0.570698  | 0            | 1         | 1         |
| Rab14_j7         | 0         | 0.514103  | 0            | 1         | 1         |
| Ggta1_j1         | 0.881018  | 1.15514   | 0            | 1         | 1         |
| Ggta1_j2         | 0         | 0.440025  | 0            | 1         | 1         |
| Ggta1_j3         | 0.882771  | 0.512036  | 0            | 1         | 1         |
| AK138201_j1      | 0.283539  | 0.326656  | 0            | 1         | 1         |
| AK138201_j3      | 1.51921   | 0.680169  | 0            | 1         | 1         |
| AK138201_j2      | 0.0993107 | 0.0921851 | 0            | 1         | 1         |

|                  |           |                        |            |           |          |
|------------------|-----------|------------------------|------------|-----------|----------|
| Rc3h2_j2         | 7.66642   | 7.6778                 | 0.00214023 | 0.983164  | 0.994966 |
| Strbp_j5         | 0.101643  | 0.223636               | 0          | 1         | 1        |
| Dennd1a          | 0.277185  | 0.518982               | 0          | 1         | 1        |
| Dennd1a_j6       | 0.0891478 | 0.121581               | 0          | 1         | 1        |
| Lrp1b_j5         | 0         | 0.055752 1.79769e+308  |            | 0.0087264 | 1        |
| Lrp1b_j11        | 0.041393  | 0.154587               | 1.90096    | 0.25269   | 1        |
| Zeb2_j4          | 0.110549  | 0.874725               | 0          | 1         | 1        |
| Rnd3_j2          | 1.32375   | 1.70609                | 0          | 1         | 1        |
| Rbm43_j2         | 6.14322   | 7.42761                | 0          | 1         | 1        |
| Neb_j5           | 0         | 0.0741551 1.79769e+308 |            | 0.0801399 | 1        |
| Cacnb4_j2        | 0.136566  | 0.0867814              | 0          | 1         | 1        |
| Prpf40a_j3       | 0.0334167 | 0.146138               | 0          | 1         | 1        |
| Acvr1_j4         | 1.35491   | 3.50352                | 0          | 1         | 1        |
| Wdsub1_j3        | 1.42878   | 1.24816                | 0          | 1         | 1        |
| Wdsub1_j2        | 1.01359   | 1.05536                | 0          | 1         | 1        |
| Baz2b_j2         | 0.645636  | 0.855578               | 0.406178   | 0.117494  | 0.426469 |
| AK166079_j3      | 0.016132  | 0.13224                | 3.03516    | 0.250729  | 1        |
| Ly75_j5          | 0         | 0.0661251 1.79769e+308 |            | 0.0058333 | 1        |
| Pla2r1_j4        | 0.0698519 | 0.180996               | 1.37359    | 0.0364536 | 0.211118 |
| Rbms1_j5         | 0         | 0.627253               | 0          | 1         | 1        |
| Fap_j4           | 0.0248711 | 0.180762               | 2.86155    | 0.0190093 | 0.136137 |
| Kcnh7_j4         | 1.29638   | 1.37062                | 0          | 1         | 1        |
| Kcnh7_j5         | 0.192437  | 0.151623               | -0.343891  | 0.72078   | 0.900079 |
| Cobll1           | 4.52E-05  | 0.492716               | 0          | 1         | 1        |
| Cobll1_j3        | 0.061939  | 0.040619               | 0          | 1         | 1        |
| Slc38a11_j1      | 0         | 0.0553079 1.79769e+308 |            | 0.021861  | 1        |
| Scn3a_j12        | 0.1144    | 0.156329               | 0.450495   | 0.491867  | 1        |
| Ttc21b_j3        | 0.176392  | 0.283929               | 0.686748   | 0.146272  | 0.474547 |
| Scn9a_j1         | 6.17961   | 3.45806                | 0          | 1         | 1        |
| Scn9a_j4         | 0.415806  | 0.574136               | 0          | 1         | 1        |
| Scn9a_j3         | 0.433245  | 0.227834               | 0          | 1         | 1        |
| Scn7a_j3         | 0.743853  | 0.888563               | 0          | 1         | 1        |
| Stk39_j1         | 33.6813   | 42.2702                | 0          | 1         | 1        |
| Stk39_j4         | 9.00282   | 16.3019                | 0          | 1         | 1        |
| Lrp2_j1          | 0.177019  | 0.1538                 | -0.202853  | 0.743594  | 0.910278 |
| Lrp2_j3          | 0         | 0.130436 1.79769e+308  |            | 0.0051103 | 1        |
| Fastkd1_j3       | 0.723851  | 0.603916               | 0          | 1         | 1        |
| 4930578N16Rik_j2 | 0         | 0.095673 1.79769e+308  |            | 0.0449788 | 1        |
| Mettl5_j2        | 4.18884   | 3.52736                | 0          | 1         | 1        |
| mKIAA0137_j1     | 9.54347   | 9.47643                | 0          | 1         | 1        |
| Mettl8_j3        | 0         | 0.0566123              | 0          | 1         | 1        |
| XLOC_018931      | 0         | 0.0980487 1.79769e+308 |            | 0.0477379 | 1        |
| Sp3_j4           | 7.01572   | 7.40137                | 0.077201   | 0.579849  | 0.831214 |
| Wipf1_j1         | 0         | 0.646038               | 0          | 1         | 1        |
| Chrna1_j2        | 0.331622  | 0.895578               | 1.43328    | 0.023931  | 0.159454 |
| Chn1_j1          | 0.448721  | 0.356441               | 0          | 1         | 1        |
| Atf2             | 0.76028   | 0.696697               | 0          | 1         | 1        |

|                   |             |           |              |           |           |
|-------------------|-------------|-----------|--------------|-----------|-----------|
| Lnp_j2            | 0.529778    | 0.828716  | 0            | 1         | 1         |
| XLOC_018948       | 0.0819829   | 0.150425  | 0            | 1         | 1         |
| Prkra_j3          | 4.86236     | 3.56979   | 0            | 1         | 1         |
| Fkbp7_j2          | 0.0396524   | 0.0508598 | 0.359121     | 0.865527  | 1         |
| Cerkl             | 0.175946    | 0.129087  | -0.446791    | 0.327906  | 0.670433  |
| Frzb_j1           | 2.9616      | 5.47465   | 0.886392     | 7.44E-08  | 4.18E-06  |
| Nckap1_j4         | 8.74315     | 7.09047   | 0            | 1         | 1         |
| Nckap1_j7         | 26.4851     | 27.503    | 0            | 1         | 1         |
| Calcr1_j2         | 0.000262254 | 0.448798  | 0            | 1         | 1         |
| Tfpi              | 0.0690087   | 0.0954682 | 0.468242     | 0.662437  | 1         |
| Ctnnd1_j5         | 2.40982     | 1.88516   | -0.354241    | 0.0579123 | 0.282427  |
| Ctnnd1_j6         | 0           | 1.46261   | 1.79769e+308 | 3.31E-17  | 8.57E-15  |
| Tmx2_j6           | 29.1353     | 29.3826   | 0            | 1         | 1         |
| Serping1_j1       | 8.82514     | 13.6726   | 0            | 1         | 1         |
| Rtn4rl2_j4        | 2.357       | 1.07452   | 0            | 1         | 1         |
| Lrrc55_j2         | 0.880263    | 1.2429    | 0.497704     | 0.0082397 | 0.0742574 |
| Ptprj_j1          | 3.37E-05    | 0.146252  | 12.0828      | 0.882006  | 1         |
| Ndufs3_j2         | 4.71078     | 4.07547   | -0.208998    | 0.397764  | 0.722115  |
| Slc39a13_j2       | 1.10968     | 0.860429  | 0            | 1         | 1         |
| Madd_j7           | 0.205954    | 0.908497  | 0            | 1         | 1         |
| Madd_j15          | 2.13081     | 1.44976   | 0            | 1         | 1         |
| Nr1h3             | 0.19089     | 0.482673  | 1.3383       | 0.022798  | 0.154209  |
| Nr1h3_j1          | 0           | 0.14827   | 1.79769e+308 | 0.0272366 | 1         |
| Nr1h3             | 0.856673    | 0.641467  | -0.417371    | 0.274604  | 0.623743  |
| Nr1h3_j2          | 0.12708     | 0.0725654 | -0.80838     | 0.521445  | 1         |
| Ddb2_j2           | 0.100584    | 0.139606  | 0            | 1         | 1         |
| Mdk               | 0.0233931   | 0.0556408 | 0            | 1         | 1         |
| Mapk8ip1_j6       | 0.348827    | 0.233557  | 0            | 1         | 1         |
| Prdm11_j6         | 0           | 0.0675692 | 1.79769e+308 | 0.102836  | 1         |
| Cd82              | 3.52899     | 4.53759   | 0            | 1         | 1         |
| Ext2_j2           | 4.82658     | 7.15764   | 0            | 1         | 1         |
| Accs_j6           | 0.054052    | 0.1139    | 0            | 1         | 1         |
| Accs_j5           | 0           | 0.095323  | 0            | 1         | 1         |
| Accs_j7           | 0.275028    | 0.107727  | 0            | 1         | 1         |
| Accsl_j1          | 0.416035    | 0.227485  | -0.870935    | 0.0875679 | 0.362171  |
| XLOC_019019       | 0.0651788   | 0.170344  | 1.38598      | 0.125093  | 0.440565  |
| Ttc17_j3          | 3.69969     | 3.64833   | 0            | 1         | 1         |
| Ttc17_j1          | 2.56406     | 2.22811   | 0            | 1         | 1         |
| Trim44_j1         | 13.8418     | 14.7116   | 0            | 1         | 1         |
| Cd44_j1           | 0           | 0.855692  | 0            | 1         | 1         |
| Nat10_j4          | 0.0246043   | 0.0727865 | 0            | 1         | 1         |
| Caprin1_j3        | 35.742      | 40.2336   | 0            | 1         | 1         |
| Caprin1_j6        | 0           | 1.44301   | 0            | 1         | 1         |
| D430041D05Rik_j11 | 0           | 0.0478947 | 1.79769e+308 | 0.144517  | 1         |
| Tcp11l1_j2        | 6.49193     | 6.62905   | 0            | 1         | 1         |
| Prrg4_j1          | 0.0899033   | 0.195683  | 1.12207      | 0.226112  | 0.573388  |
| Eif3m_j3          | 0           | 0.23796   | 1.79769e+308 | 1.62E-05  | 0.0004679 |

|                  |           |           |              |           |           |
|------------------|-----------|-----------|--------------|-----------|-----------|
| AK084494_j2      | 0.0836338 | 0.14046   | 0.748        | 0.510407  | 1         |
| 2700007P21Rik_j1 | 0.699578  | 1.25037   | 0            | 1         | 1         |
| Tmem85_j1        | 13.263    | 22.8129   | 0            | 1         | 1         |
| Ryr3_j6          | 0.185194  | 0.379611  | 1.03549      | 0.0119    | 0.0975729 |
| Ryr3_j8          | 0.118849  | 0.139375  | 0.229844     | 0.810181  | 1         |
| Ryr3_j9          | 0.127723  | 0.198151  | 0.63358      | 0.242791  | 0.590221  |
| Ryr3_j10         | 0.2072    | 0.0756628 | -1.45337     | 0.0568085 | 0.27897   |
| Ryr3_j15         | 0.0417956 | 0.102691  | 1.29688      | 0.142989  | 1         |
| Ryr3_j18         | 0.0564107 | 0.140348  | 1.31497      | 0.0926525 | 1         |
| Meis2_j2         | 1.46634   | 0.790777  | 0            | 1         | 1         |
| Meis2_j3         | 2.09147   | 0.539216  | 0            | 1         | 1         |
| Meis2            | 0.76391   | 0.370274  | 0            | 1         | 1         |
| Bmf_j2           | 0.0272841 | 0.0562782 | 1.04452      | 0.338602  | 1         |
| A430105I19Rik_j7 | 0         | 0.271921  | 0            | 1         | 1         |
| A430105I19Rik_j8 | 0.323335  | 0.0795905 | 0            | 1         | 1         |
| Ino80_j1         | 0.102969  | 0.256101  | 0            | 1         | 1         |
| Exd1_j2          | 0.0327868 | 0.0633749 | 0.950795     | 0.497012  | 1         |
| Exd1_j3          | 0.0539879 | 0.0364518 | -0.566647    | 0.671714  | 1         |
| Exd1_j4          | 0.0509026 | 0.0613751 | 0.269915     | 0.814343  | 1         |
| Rpap1_j2         | 1.28121   | 1.90815   | 0            | 1         | 1         |
| Spnb5_j3         | 0.0457173 | 0.0546418 | 0.257265     | 0.661724  | 1         |
| Spnb5_j10        | 0.0385759 | 0.0504713 | 0.387762     | 0.811418  | 1         |
| Spnb5_j1         | 0.08731   | 0.151922  | 0.799116     | 0.317891  | 1         |
| Ehd4_j1          | 2.22721   | 3.40001   | 0            | 1         | 1         |
| Cdan1_j3         | 0.617666  | 0.685137  | 0            | 1         | 1         |
| Ubr1_j5          | 0.25012   | 0.889204  | 0            | 1         | 1         |
| Ubr1_j6          | 0.315465  | 1.15476   | 0            | 1         | 1         |
| Trp53bp1_j5      | 0.0185032 | 0.797437  | 0            | 1         | 1         |
| Ppip5k1_j1       | 1.91027   | 1.67932   | 0            | 1         | 1         |
| Ppip5k1_j2       | 9.19677   | 7.68575   | 0            | 1         | 1         |
| Spg11_j1         | 0         | 0.109627  | 1.79769e+308 | 0.0003582 | 1         |
| Patl2_j1         | 0.0350913 | 0.181161  | 2.36809      | 0.0839784 | 0.353567  |
| Duoxa1_j1        | 0.0555506 | 0.200506  | 1.85177      | 0.0881166 | 0.363421  |
| Duoxa1_j2        | 0.0621165 | 0.136471  | 1.13555      | 0.383335  | 1         |
| Duoxa1           | 0.30084   | 0.131003  | -1.1994      | 0.166203  | 0.502787  |
| AK030357_j1      | 0.192104  | 0.199676  | 0.055773     | 0.948338  | 0.985052  |
| Fbn1_j3          | 0         | 0.127838  | 1.79769e+308 | 0.0003864 | 1         |
| Fbn1_j6          | 0.0309253 | 0.0806904 | 1.38361      | 0.272469  | 1         |
| Cep152_j4        | 0.081874  | 0.0452118 | -0.856707    | 0.540955  | 1         |
| Cep152_j7        | 0.0425353 | 0.137659  | 1.69437      | 0.1608    | 1         |
| Cep152_j14       | 0         | 0.079092  | 1.79769e+308 | 0.0308619 | 1         |
| Cep152_j15       | 0.069374  | 0.0427548 | -0.698308    | 1         | 1         |
| Shc4_j2          | 3.2086    | 3.30334   | 0.0419839    | 0.778808  | 0.925532  |
| Secisbp2l_j5     | 0.747331  | 0.380785  | 0            | 1         | 1         |
| Cops2_j1         | 13.03     | 15.8209   | 0            | 1         | 1         |
| Trpm7_j4         | 0.0297187 | 0.219783  | 0            | 1         | 1         |
| Kcnip3_j5        | 10.808    | 18.5636   | 0            | 1         | 1         |



|                  |           |           |              |           |           |
|------------------|-----------|-----------|--------------|-----------|-----------|
| Prom2_j1         | 0.33877   | 0.13746   | -1.30129     | 0.0160208 | 0.120475  |
| Gm14005          | 0         | 0.114969  | 1.79769e+308 | 0.0650638 | 1         |
| Zc3h8_j2         | 0.101527  | 0.325534  | 1.68095      | 0.0641604 | 0.300651  |
| Gm14025_j2       | 0.475468  | 0.42972   | -0.145951    | 0.609447  | 0.846192  |
| XLOC_019158      | 0.307002  | 0.263764  | -0.219001    | 0.388943  | 0.71624   |
| ldh3b            | 8.38578   | 6.15311   | -0.446629    | 0.0046983 | 0.0484224 |
| Cpxm1_j1         | 2.29534   | 3.09955   | 0.433348     | 0.0434101 | 0.236471  |
| Prosapip1_j1     | 0.426803  | 0.168361  | 0            | 1         | 1         |
| Slc4a11_j8       | 2.23703   | 3.94374   | 0            | 1         | 1         |
| Slc4a11_j9       | 0.365122  | 0.292551  | 0            | 1         | 1         |
| Slc4a11_j10      | 0.0421737 | 0.171078  | 0            | 1         | 1         |
| 4930402H24Rik_j3 | 1.01465   | 0.934107  | 0            | 1         | 1         |
| A730017L22Rik_j1 | 0.195653  | 0.234981  | 0.264246     | 0.419412  | 0.736103  |
| Adam33_j7        | 0.0302114 | 0.0694903 | 1.20172      | 0.280518  | 1         |
| 1700037H04Rik_j3 | 4.73991   | 3.4532    | 0            | 1         | 1         |
| Spef1_j2         | 18.562    | 19.917    | 0            | 1         | 1         |
| Pcna_j1          | 3.33385   | 3.73065   | 0.162241     | 0.554651  | 0.817684  |
| Prokr2           | 0.233161  | 1.07778   | 0            | 1         | 1         |
| Lrrn4_j2         | 0.744307  | 0.510811  | -0.543109    | 0.0580196 | 0.282639  |
| Pak7_j4          | 0         | 0.0799856 | 1.79769e+308 | 0.0094792 | 1         |
| Mkks_j1          | 11.6048   | 8.90622   | 0            | 1         | 1         |
| Kif16b_j4        | 0.407018  | 0.885041  | 1.12065      | 0.0003782 | 0.0064781 |
| Rrbp1_j3         | 0.522297  | 1.43947   | 0            | 1         | 1         |
| Rrbp1_j6         | 1.35451   | 2.71674   | 0            | 1         | 1         |
| Rrbp1_j5         | 0.426439  | 0.263848  | 0            | 1         | 1         |
| Rrbp1_j4         | 1.30865   | 1.0022    | 0            | 1         | 1         |
| 6330439K17Rik_j3 | 1.63091   | 0.537322  | 0            | 1         | 1         |
| 6330439K17Rik_j2 | 0.45207   | 1.0014    | 0            | 1         | 1         |
| 6330439K17Rik_j1 | 1.0347    | 1.85199   | 0            | 1         | 1         |
| Ralgapa2_j6      | 0.173543  | 0.133901  | -0.374131    | 0.403502  | 0.726353  |
| Ralgapa2_j4      | 0.0536555 | 0.186835  | 1.79997      | 0.0008189 | 0.012198  |
| Zfp120_j3        | 0         | 0.220082  | 0            | 1         | 1         |
| Acss1_j1         | 0.293572  | 0.558301  | 0.927326     | 0.0523119 | 0.265559  |
| Ninl_j4          | 0.249373  | 0.119403  | -1.06247     | 0.073474  | 0.326641  |
| Ninl_j5          | 0.14431   | 0.153585  | 0.0898688    | 0.873015  | 0.959782  |
| AA387200_j4      | 0.159795  | 0.288398  | 0.851839     | 0.194943  | 0.537285  |
| Rbck1_j1         | 13.4967   | 12.4833   | 0            | 1         | 1         |
| Rbck1            | 0         | 2.50822   | 0            | 1         | 1         |
| Bcl2l1_j2        | 4.66291   | 3.7498    | 0            | 1         | 1         |
| Dusp15_j2        | 3.49751   | 3.63448   | 0            | 1         | 1         |
| Pdrg1_j6         | 4.32346   | 8.38273   | 0            | 1         | 1         |
| 8430427H17Rik_j3 | 2.09751   | 3.97238   | 0            | 1         | 1         |
| 8430427H17Rik_j4 | 0         | 1.49485   | 0            | 1         | 1         |
| Cdk5rap1_j1      | 1.14315   | 1.86805   | 0.708516     | 0.0360089 | 0.209396  |
| Necab3_j9        | 5.74003   | 5.67733   | 0            | 1         | 1         |
| Pxmp4_j1         | 2.05103   | 1.32703   | -0.628151    | 0.109002  | 0.410746  |
| Eif2s2_j2        | 0.166611  | 0.220621  | 0.405084     | 0.392758  | 0.718932  |

|                  |           |           |              |           |           |
|------------------|-----------|-----------|--------------|-----------|-----------|
| Ahcy_j1          | 0.482821  | 0.677834  | 0.489443     | 0.0643605 | 0.30127   |
| Ggt7_j1          | 51.2192   | 56.6764   | 0.146063     | 0.113841  | 0.419484  |
| Uqcc_j2          | 0         | 0.0500434 | 0            | 1         | 1         |
| Cpne1_j2         | 0.0577317 | 0.115189  | 0            | 1         | 1         |
| Nfs1_j2          | 7.13945   | 9.23723   | 0            | 1         | 1         |
| Rbm39            | 13.2325   | 15.7142   | 0            | 1         | 1         |
| AK015092_j6      | 0.319762  | 0.0370727 | -3.10857     | 0.0192729 | 0.137424  |
| AK015092_j7      | 0.0683293 | 0.238986  | 1.80635      | 0.0483731 | 0.253052  |
| Dsn1_j2          | 0         | 0.0636325 | 1.79769e+308 | 0.0301846 | 1         |
| 9830001H06Rik_j2 | 0.0895209 | 0.0596294 | 0            | 1         | 1         |
| Rbl1_j3          | 0         | 0.071163  | 1.79769e+308 | 0.0430936 | 1         |
| Gm14286_j7       | 0.166953  | 0.252373  | 0.596111     | 0.0572296 | 0.280348  |
| D630003M21Rik_j1 | 0.0762854 | 0.258163  | 1.7588       | 0.0565356 | 0.278163  |
| 9430008C03Rik_j7 | 0.0992978 | 0.1928    | 0.957269     | 0.268944  | 0.61796   |
| Zhx3_j3          | 0.313198  | 0.452533  | 0.530946     | 0.0700502 | 0.31768   |
| Tomm34_j4        | 3.24712   | 9.45152   | 0            | 1         | 1         |
| Tomm34           | 9.3836    | 8.80501   | 0            | 1         | 1         |
| Matn4_j1         | 3.62311   | 3.55417   | -0.0277173   | 0.914758  | 0.973386  |
| Sdc4_j1          | 0         | 0.622055  | 1.79769e+308 | 1.78E-05  | 0.0005038 |
| Zfp335_j3        | 0.199     | 0.308525  | 0.632617     | 0.0199226 | 0.140432  |
| Zfp335_j8        | 3.5611    | 3.72773   | 0.0659715    | 0.713564  | 0.896209  |
| Zmynd8_j1        | 4.67929   | 4.35085   | 0            | 1         | 1         |
| Zmynd8_j2        | 3.02638   | 2.65709   | 0            | 1         | 1         |
| Gm14267_j2       | 0.0431082 | 0.174197  | 2.01469      | 0.193508  | 0.535786  |
| Gm14267          | 0.0640178 | 0.0792638 | 0.308187     | 0.80056   | 1         |
| Prex1_j5         | 2.01458   | 2.02958   | 0.0107028    | 0.952167  | 0.986165  |
| Stau1_j1         | 0.76683   | 0.753758  | 0            | 1         | 1         |
| Znfx1_j3         | 0.0209119 | 1.03986   | 0            | 1         | 1         |
| Ptgis_j1         | 0.0709581 | 0.121293  | 0.773461     | 0.368838  | 1         |
| Ptgis_j2         | 0.197962  | 0.204102  | 0.0440676    | 0.928091  | 0.977771  |
| B4galt5_j1       | 4.37044   | 5.02875   | 0            | 1         | 1         |
| Fam65c_j7        | 0.224552  | 0.194625  | -0.206354    | 0.63728   | 0.859508  |
| Adnp_j1          | 8.02768   | 10.4917   | 0            | 1         | 1         |
| Adnp             | 5.9705    | 4.37477   | 0            | 1         | 1         |
| Zfp217_j1        | 0.606141  | 0.511908  | -0.243771    | 0.456129  | 0.759706  |
| Zfp217           | 0.0075886 | 0.519479  | 6.09709      | 2.35E-05  | 0.0006318 |
| Bmp7_j2          | 0.29606   | 0.323951  | 0.129885     | 0.846934  | 0.951557  |
| Bmp7_j3          | 0.31121   | 0.389756  | 0.324684     | 0.533123  | 0.804862  |
| Zbp1_j5          | 0.0796876 | 0.0641017 | -0.313994    | 0.784156  | 1         |
| Ppp4r1l-ps_j9    | 0.124108  | 0.0965629 | 0            | 1         | 1         |
| AK166773_j2      | 0.262711  | 0.145945  | -0.848056    | 0.161197  | 0.496146  |
| Sycp2_j1         | 0.0194429 | 0.0761542 | 1.96968      | 0.303619  | 1         |
| Sycp2_j3         | 0.0865784 | 0.219882  | 1.34465      | 0.341957  | 0.681825  |
| Taf4a_j3         | 0         | 0.45225   | 0            | 1         | 1         |
| Psm7_j4          | 30.5196   | 37.4347   | 0            | 1         | 1         |
| Hrh3_j5          | 0.0569358 | 0.0541408 | -0.0726194   | 0.951766  | 1         |
| Lama5_j1         | 0.37693   | 0.441577  | 0.228368     | 0.313174  | 0.657504  |

|              |           |           |              |           |           |
|--------------|-----------|-----------|--------------|-----------|-----------|
| Cables2_j9   | 0         | 0.356514  | 0            | 1         | 1         |
| AK045814_j3  | 0.459462  | 0.7362    | 0.680151     | 0.297509  | 0.644154  |
| AK045814_j5  | 0.504324  | 0.0676449 | -2.8983      | 0.012563  | 0.101556  |
| Ythdf1_j2    | 19.5905   | 18.1538   | -0.109886    | 0.26905   | 0.618001  |
| Kcnq2_j5     | 0.678554  | 0.661933  | 0            | 1         | 1         |
| Kcnq2_j4     | 0.202407  | 0.213184  | 0            | 1         | 1         |
| Kcnq2_j6     | 2.9531    | 2.4973    | 0            | 1         | 1         |
| Eef1a2_j2    | 15.9872   | 24.0172   | 0            | 1         | 1         |
| BC006779_j8  | 0.0747295 | 0.186411  | 1.31874      | 0.0068321 | 0.0645944 |
| BC006779_j14 | 0.0346893 | 0.113432  | 1.70927      | 0.369113  | 1         |
| Gmeb2_j1     | 0         | 0.0904093 | 1.79769e+308 | 0.014197  | 1         |
| Stmn3_j5     | 0.307568  | 0.541573  | 0            | 1         | 1         |
| Zbtb46_j3    | 0         | 0.146507  | 1.79769e+308 | 0.0008723 | 1         |
| Znf512b_j6   | 0.155132  | 0.328288  | 0            | 1         | 1         |
| Fam171a1_j1  | 2.21142   | 4.08069   | 0            | 1         | 1         |
| Dclre1c_j3   | 0.519171  | 0.570453  | 0            | 1         | 1         |
| Cdnf_j3      | 0.644705  | 0.749439  | 0.217172     | 0.461707  | 0.762973  |
| Fam107b_j1   | 0         | 0.575885  | 0            | 1         | 1         |
| Frmd4a_j4    | 0.682377  | 1.58891   | 0            | 1         | 1         |
| Bend7_j3     | 0         | 0.299703  | 1.79769e+308 | 1.87E-05  | 0.0005257 |
| Sephs1_j2    | 0.36294   | 0.749198  | 1.04561      | 0.0317251 | 0.192861  |
| Upf2_j5      | 1.31503   | 1.73294   | 0            | 1         | 1         |
| Usp6nl_j3    | 0.0242476 | 1.54979   | 0            | 1         | 1         |
| Usp6nl_j6    | 0         | 0.29403   | 0            | 1         | 1         |
| Il15ra       | 0.32864   | 0.268272  | -0.292813    | 0.690452  | 0.885326  |
| Il15ra_j5    | 0.589345  | 0.349694  | -0.753021    | 0.300885  | 0.647316  |
| Pter_j1      | 0.149071  | 0.148385  | -0.00665166  | 0.993229  | 0.997985  |
| Vim_j6       | 13.1632   | 33.2463   | 1.33668      | 0         | 0         |
| Mllt10       | 0         | 0.175339  | 1.79769e+308 | 2.24E-06  | 8.41E-05  |
| Mllt10_j4    | 0.217789  | 0.312313  | 0.520063     | 0.0989927 | 0.389269  |
| BC061194_j9  | 0.0437939 | 0.0884972 | 1.0149       | 0.543226  | 1         |
| Msrp2_j1     | 5.26165   | 5.17234   | -0.0246969   | 0.918     | 0.974435  |
| Etl4_j12     | 2.54784   | 2.19476   | 0            | 1         | 1         |
| Gm13375_j1   | 3.74226   | 5.12707   | 0            | 1         | 1         |
| Acdb5_j1     | 1.78631   | 2.2031    | 0            | 1         | 1         |
| Yme1l1_j3    | 0         | 0.210812  | 0            | 1         | 1         |
| XLOC_017926  | 0         | 0.117345  | 1.79769e+308 | 0.0205003 | 1         |
| Pnpla7_j3    | 0         | 0.142111  | 1.79769e+308 | 0.0011085 | 1         |
| Pnpla7_j8    | 0         | 0.0669757 | 1.79769e+308 | 0.102615  | 1         |
| Nelf_j6      | 1.3509    | 1.36857   | 0            | 1         | 1         |
| Nelf_j8      | 5.50227   | 7.35854   | 0            | 1         | 1         |
| Entpd2_j1    | 0.787175  | 2.10599   | 1.41974      | 4.05E-05  | 0.0009956 |
| Abca2_j6     | 0         | 0.448253  | 1.79769e+308 | 3.29E-10  | 2.98E-08  |
| Abca2_j8     | 4.81975   | 9.69797   | 1.00872      | 0         | 0         |
| Edf1_j3      | 58.3789   | 35.0027   | -0.737978    | 6.58E-05  | 0.0015071 |
| Edf1_j4      | 0.0134967 | 35.0027   | 11.3406      | 0.125213  | 0.440797  |
| Kcnt1_j2     | 3.10169   | 1.78121   | 0            | 1         | 1         |

|               |           |           |               |           |          |
|---------------|-----------|-----------|---------------|-----------|----------|
| Kcnt1_j5      | 8.07258   | 6.63383   | 0             | 1         | 1        |
| Kcnt1_j8      | 0.834676  | 1.55258   | 0             | 1         | 1        |
| XLOC_017947   | 0.0768969 | 0.0796323 | 0             | 1         | 1        |
| Gpsm1_j4      | 0.22843   | 0.1869    | 0             | 1         | 1        |
| Pmpca_j2      | 0.104807  | 0.0570617 | 0             | 1         | 1        |
| Pmpca_j5      | 13.3742   | 14.6239   | 0             | 1         | 1        |
| Egfl7_j1      | 0.413927  | 0.336286  | -0.299687     | 0.711238  | 0.89506  |
| Gm711_j1      | 0.0479153 | 0.151074  | 1.6567        | 0.136494  | 1        |
| Adamtsl2_j2   | 0         | 0.113971  | 1.79769e+308  | 0.0082931 | 1        |
| Adamtsl2_j6   | 0         | 0.0598358 | 1.79769e+308  | 0.106675  | 1        |
| Rxra_j4       | 2.22078   | 2.63167   | 0             | 1         | 1        |
| Ralgds_j1     | 0         | 0.251081  | 0             | 1         | 1        |
| Ralgds_j4     | 4.4651    | 8.36665   | 0             | 1         | 1        |
| Tsc1_j1       | 0.233165  | 0.281033  | 0             | 1         | 1        |
| Tsc1_j3       | 0.433161  | 0.170064  | 0             | 1         | 1        |
| Ttf1_j2       | 0.0499898 | 0         | -1.79769e+308 | 0.0309578 | 1        |
| Ttf1_j4       | 0.0376813 | 0.0920544 | 1.28864       | 0.283699  | 1        |
| Slc27a4_j2    | 3.13845   | 8.44141   | 0             | 1         | 1        |
| Slc27a4_j3    | 11.4447   | 20.5918   | 0             | 1         | 1        |
| Cercam_j2     | 0.459093  | 0.488338  | 0.0890961     | 0.810189  | 0.937876 |
| Cercam_j1     | 0.632124  | 0.392912  | -0.686001     | 0.0874886 | 0.361997 |
| Cercam_j3     | 0.639132  | 0.820925  | 0.361135      | 0.169203  | 0.505902 |
| Odf2_j6       | 0.292268  | 0.283454  | -0.0441747    | 0.931951  | 0.97932  |
| Odf2_j13      | 0.10581   | 0.193326  | 0.869558      | 0.211893  | 0.556681 |
| Gle1_j1       | 6.06182   | 6.91195   | 0.189342      | 0.384854  | 0.713552 |
| Spna2_j4      | 35.5957   | 39.8416   | 0             | 1         | 1        |
| Spna2_j3      | 28.9108   | 35.2205   | 0             | 1         | 1        |
| Nup188_j1     | 0.743063  | 0.67796   | 0             | 1         | 1        |
| Nup188_j3     | 0.0350723 | 0.0628616 | 0             | 1         | 1        |
| Nup188_j4     | 0.0729653 | 0.0679418 | 0             | 1         | 1        |
| Prrx2         | 0.0299727 | 0.0738911 | 1.30175       | 0.510844  | 1        |
| Prdm12_j4     | 12.4616   | 10.9959   | 0             | 1         | 1        |
| Golga2_j1     | 10.7195   | 11.1891   | 0.0618682     | 0.534304  | 0.805503 |
| Ptges2_j7     | 0         | 0.334632  | 1.79769e+308  | 0.0172362 | 0.127027 |
| St6galnac6_j1 | 0.568878  | 1.45048   | 1.35034       | 4.54E-08  | 2.71E-06 |
| Eng_j1        | 1.72723   | 1.77318   | 0.0378756     | 0.798809  | 0.933125 |
| Sh2d3c_j1     | 0.122267  | 0.0940017 | -0.379279     | 0.682246  | 1        |
| Hspa5_j1      | 34.1694   | 41.3886   | 0             | 1         | 1        |
| Dab2ip_j1     | 0.077061  | 0.0533952 | 0             | 1         | 1        |
| Rabgap1_j3    | 0         | 0.392473  | 0             | 1         | 1        |
| Rabgap1_j5    | 8.64257   | 9.26211   | 0             | 1         | 1        |
| XLOC_018045   | 0.10692   | 0.098064  | -0.124733     | 0.886495  | 1        |
| Lypd6b_j9     | 0.0562713 | 0.265806  | 2.2399        | 0.0168812 | 0.125138 |
| Rif1_j5       | 0.0364511 | 0.0711019 | 0.963926      | 0.535733  | 1        |
| Rif1_j9       | 0.0848406 | 0.136121  | 0.682064      | 0.565769  | 1        |
| Rif1_j12      | 1.02581   | 1.05242   | 0.0369417     | 0.85133   | 0.952833 |
| Rif1_j11      | 0         | 0.058419  | 1.79769e+308  | 0.0182802 | 1        |

|                  |             |                        |            |           |           |
|------------------|-------------|------------------------|------------|-----------|-----------|
| XLOC_018073      | 0.0734723   | 0.0959427              | 0.384972   | 0.841314  | 1         |
| XLOC_018077      | 0.0435256   | 0.212485               | 0          | 1         | 1         |
| Galnt13_j8       | 0.0598501   | 0.055079               | -0.11985   | 0.892801  | 1         |
| Upp2_j3          | 0.152542    | 0.207326               | 0.442693   | 0.551404  | 0.815825  |
| Upp2_j5          | 0.483372    | 0.297197               | -0.701711  | 0.189371  | 0.5311    |
| AK050909_j3      | 7.28E-05    | 0.213907               | 11.5217    | 0.95165   | 0.986029  |
| Slc4a10_j6       | 0.0118085   | 0.092729               | 2.9732     | 0.176406  | 1         |
| Scn2a1_j4        | 0.0628288   | 0.143996               | 1.19653    | 0.0153725 | 1         |
| Scn2a1_j5        | 0.0771625   | 0 -1.79769e+308        |            | 5.04E-06  | 1         |
| Gm13630_j3       | 0.0124611   | 0.0532551              | 0          | 1         | 1         |
| Klhl23_j4        | 0           | 0.0614259 1.79769e+308 |            | 0.0381705 | 1         |
| Ssb_j1           | 1.67332     | 1.81289                | 0          | 1         | 1         |
| Ssb_j2           | 7.30884     | 8.25921                | 0          | 1         | 1         |
| 4933404M02Rik_j1 | 0.055307    | 0.236497               | 2.09629    | 0.115759  | 0.423327  |
| Dync1i2_j1       | 10.9935     | 4.96409                | 0          | 1         | 1         |
| Dync1i2_j9       | 50.2656     | 53.7169                | 0          | 1         | 1         |
| Metap1d_j3       | 1.43974     | 1.37165                | -0.0698909 | 0.856803  | 0.954683  |
| Metap1d_j5       | 1.46783     | 1.15503                | -0.345749  | 0.465925  | 0.765799  |
| Rapgef4_j1       | 4.86227     | 3.72774                | 0          | 1         | 1         |
| Cdca7_j4         | 0.0739493   | 0.111034               | 0.586394   | 0.620699  | 1         |
| Scrn3_j2         | 0.825208    | 0.928887               | 0          | 1         | 1         |
| Gm13705_j2       | 2.06E-05    | 0.187792               | 13.1572    | 0.995192  | 0.998726  |
| Hoxd10_j2        | 1.83184     | 3.30575                | 0.851687   | 0.0006251 | 0.0098101 |
| XLOC_018152      | 0.0873078   | 0.144524               | 0.727122   | 0.623731  | 1         |
| Osbpl6_j2        | 0           | 0.0794176              | 0          | 1         | 1         |
| Osbpl6_j3        | 4.16545     | 3.10246                | 0          | 1         | 1         |
| Plekha3_j1       | 1.9368      | 1.67505                | -0.209474  | 0.580524  | 0.831595  |
| Plekha3_j2       | 9.94489     | 12.7377                | 0.357083   | 0.0185946 | 0.134058  |
| XLOC_018163      | 0.292483    | 0.665503               | 1.18609    | 0.177051  | 0.516175  |
| Ssfa2_j4         | 0           | 0.0669218              | 0          | 1         | 1         |
| Ssfa2_j6         | 5.33027     | 5.1361                 | 0          | 1         | 1         |
| Dusp19_j1        | 0.0891521   | 0.115735               | 0          | 1         | 1         |
| SKRP1            | 0.121501    | 0.22027                | 0          | 1         | 1         |
| Zfp804a_j3       | 3.76138     | 2.18695                | 0          | 1         | 1         |
| Itgav            | 1.36753     | 1.08955                | 0          | 1         | 1         |
| Fam171b_j4       | 7.56446     | 11.9243                | 0          | 1         | 1         |
| Slc43a3_j2       | 0.422899    | 0.546216               | 0.369158   | 0.471679  | 0.769131  |
| Ssrp1_j1         | 3.78734     | 4.20366                | 0          | 1         | 1         |
| Gm13715_j1       | 0.264159    | 0.278376               | 0.0756277  | 0.908667  | 0.97121   |
| Fnbp4_j1         | 0.74154     | 0.721915               | 0          | 1         | 1         |
| Fnbp4_j7         | 0.459308    | 0.880926               | 0          | 1         | 1         |
| Agbl2_j3         | 0           | 0.10717 1.79769e+308   |            | 0.0961462 | 1         |
| Arfgap2_j4       | 3.31856     | 3.25148                | -0.0294619 | 0.831172  | 0.945525  |
| Ambra1_j3        | 0.0527988   | 0.0645754              | 0          | 1         | 1         |
| Phf21a_j6        | 0.24107     | 0.382582               | 0          | 1         | 1         |
| Phf21a_j7        | 0.000752725 | 0.311732               | 0          | 1         | 1         |
| Phf21a_j12       | 0.0783686   | 0.442112               | 0          | 1         | 1         |

|                  |             |           |              |           |           |
|------------------|-------------|-----------|--------------|-----------|-----------|
| Cd59a_j1         | 48.2069     | 60.3741   | 0            | 1         | 1         |
| AK015665_j8      | 0.0484592   | 0.119071  | 1.29698      | 0.127929  | 1         |
| Cstf3_j1         | 1.90324     | 2.12843   | 0            | 1         | 1         |
| Cstf3_j4         | 0.573682    | 1.03045   | 0            | 1         | 1         |
| Cstf3_j3         | 0.0603306   | 0.0784343 | 0            | 1         | 1         |
| XLOC_018244      | 0.0438883   | 0.148532  | 1.75886      | 0.104989  | 1         |
| Mpped2           | 4.26533     | 2.55929   | 0            | 1         | 1         |
| Kif18a_j3        | 0.0793573   | 0.0846215 | 0.0926605    | 0.925343  | 1         |
| XLOC_018273      | 0.0910385   | 0.0860956 | 0            | 1         | 1         |
| Slc12a6_j2       | 0.29747     | 0.0827382 | 0            | 1         | 1         |
| Eif2ak4_j1       | 0.651362    | 0.493182  | 0            | 1         | 1         |
| Eif2ak4_j3       | 1.38127     | 0.95506   | 0            | 1         | 1         |
| Disp2_j6         | 2.9964      | 2.87197   | 0            | 1         | 1         |
| Bahd1_j3         | 0.27661     | 0.211589  | -0.386586    | 0.519736  | 0.797285  |
| Rad51            | 0.0574422   | 0.17755   | 1.62805      | 0.0877646 | 0.362622  |
| Zfyve19_j3       | 2.46094     | 3.62994   | 0            | 1         | 1         |
| 1500003O03Rik_j2 | 3.33212     | 4.07097   | 0            | 1         | 1         |
| 1700020I14Rik_j2 | 29.8233     | 26.6561   | -0.161976    | 0.10213   | 0.396046  |
| XLOC_018316      | 0.106218    | 0.382016  | 1.8466       | 0.134565  | 0.456567  |
| Mga_j9           | 0.0181369   | 0.0612747 | 1.75637      | 0.0515432 | 1         |
| Mga_j12          | 1.2241      | 1.56543   | 0.354843     | 0.0494047 | 0.256438  |
| Capn3_j5         | 0           | 0.0600623 | 1.79769e+308 | 0.107861  | 1         |
| Capn3_j6         | 0.000940113 | 0.0949807 | 6.65866      | 0.701522  | 1         |
| Snap23_j2        | 0           | 0.135155  | 0            | 1         | 1         |
| Stard9_j2        | 0.12434     | 0.0921272 | 0            | 1         | 1         |
| XLOC_018324      | 0.054908    | 0.109657  | 0            | 1         | 1         |
| XLOC_018324      | 0           | 0.0542387 | 0            | 1         | 1         |
| XLOC_018324      | 0.0729398   | 0.19275   | 0            | 1         | 1         |
| Ctdspl2_j3       | 0.0573449   | 0.15735   | 1.45624      | 0.0315868 | 0.192231  |
| Ctdspl2_j7       | 0.283679    | 0.111291  | -1.34992     | 0.0243293 | 0.161277  |
| Eif3j_j4         | 0.0476375   | 0.0314099 | -0.600876    | 0.736084  | 1         |
| Sord_j3          | 0.308649    | 0.227659  | -0.43909     | 0.489149  | 0.779521  |
| Gm14085_j1       | 0           | 0.151858  | 1.79769e+308 | 0.0480742 | 1         |
| AA467197_j1      | 2.87E-05    | 0.859368  | 14.8685      | 0.990472  | 0.997044  |
| XLOC_018349      | 0           | 0.218114  | 1.79769e+308 | 0.0063406 | 0.0611707 |
| Slc12a1_j1       | 0           | 0.0470461 | 1.79769e+308 | 0.0978501 | 1         |
| Dtwd1_j3         | 0           | 0.0973306 | 1.79769e+308 | 0.106209  | 1         |
| Dtwd1_j5         | 0.0669707   | 0.190519  | 1.50833      | 0.252848  | 0.600908  |
| Blvra_j2         | 1.55586     | 2.32279   | 0            | 1         | 1         |
| Mrps5_j6         | 1.06397     | 1.90403   | 0.839603     | 0.131477  | 0.451384  |
| Bcl2l11          | 0.505434    | 0.737887  | 0.545876     | 0.0454925 | 0.244195  |
| Mertk_j3         | 0.0381796   | 0.193996  | 2.34515      | 0.0169508 | 0.125455  |
| Tmem87b_j5       | 9.01537     | 8.78032   | -0.0381133   | 0.7499    | 0.913026  |
| Zc3h6_j5         | 0.000132278 | 0.09492   | 9.48699      | 0.643612  | 1         |
| Zc3h6_j3         | 0.110429    | 0.173627  | 0.652873     | 0.169044  | 0.505791  |
| AK042010_j2      | 0.0180478   | 0.0989818 | 2.45534      | 0.322616  | 1         |
| Sirpa_j2         | 0.217097    | 0.14931   | -0.540026    | 0.563155  | 0.822428  |

|                  |            |           |              |                     |           |
|------------------|------------|-----------|--------------|---------------------|-----------|
| Nop56_j4         | 0          | 0.0834616 | 1.79769e+308 | 0.0010618           | 1         |
| XLOC_018390      | 0.120572   | 0.186647  |              | 0 1                 | 1         |
| Ptpa_j2          | 16.7427    | 15.5936   |              | 0 1                 | 1         |
| ltpa_j5          | 0.0696411  | 0.0771507 |              | 0.14774 0.94594     | 1         |
| XLOC_018395      | 0.0405565  | 0.392222  |              | 3.27367 0.122206    | 0.435235  |
| Cdc25b_j1        | 0.164201   | 0.290137  |              | 0.821272 0.142782   | 0.469635  |
| Cdc25b_j2        | 0.388563   | 0.422506  |              | 0.120821 0.78868    | 0.929506  |
| Mavs_j5          | 0.18201    | 0.133333  |              | -0.448991 0.546201  | 0.812921  |
| Prnd_j1          | 7.75835    | 19.551    |              | 1.33342 0           | 0         |
| Cds2_j2          | 0.733658   | 2.06216   |              | 0 1                 | 1         |
| Chgb_j4          | 4.14211    | 4.53994   |              | 0.132304 0.459658   | 0.761548  |
| Mcm8_j3          | 0.0819348  | 0.218813  |              | 0 1                 | 1         |
| Plcb4_j7         | 3.50354    | 3.17856   |              | 0 1                 | 1         |
| 2310003L22Rik_j5 | 14.8682    | 18.7049   |              | 0.33119 0.0577473   | 0.281811  |
| Macro2_j9        | 4.27525    | 1.78393   |              | -1.26095 0.0128104  | 0.102975  |
| Macro2_j14       | 0.0858035  | 0.0805819 |              | -0.0905811 0.910989 | 1         |
| Pcsk2_j4         | 15.0129    | 20.6881   |              | 0 1                 | 1         |
| Csrp2bp_j1       | 0          | 0.394989  | 1.79769e+308 | 4.95E-05            | 0.0011845 |
| LOC668917_j2     | 0          | 0.158447  | 1.79769e+308 | 0.0392271           | 0.221085  |
| LOC668917_j5     | 0.546794   | 0.768415  |              | 0.490887 0.413451   | 0.732276  |
| Sec23b_j3        | 1.17961    | 1.93796   |              | 0 1                 | 1         |
| Rin2_j4          | 0.0151825  | 0.179281  |              | 3.56174 0.0024473   | 0.0293373 |
| Rin2_j8          | 5.517      | 5.57898   |              | 0.0161185 0.909989  | 0.971581  |
| Naa20_j3         | 4.50467    | 5.08107   |              | 0.173709 0.231626   | 0.578702  |
| RP23-125A1.2_j2  | 0.052745   | 0.146386  |              | 1.47267 0.0852803   | 1         |
| 4930529M08Rik_j4 | 0.034037   | 0.100248  |              | 1.5584 0.308692     | 1         |
| 4930529M08Rik_j6 | 0          | 0.319249  | 1.79769e+308 | 0.0409621           | 0.227417  |
| Pygb_j1          | 64.1564    | 47.3551   |              | -0.438073 2.58E-06  | 9.50E-05  |
| Scrt2_j3         | 0.0977969  | 0.0682742 |              | -0.518447 0.6376    | 1         |
| Csnk2a1_j1       | 0.117235   | 0.160703  |              | 0.454997 0.603334   | 0.843376  |
| Rem1_j2          | 0.062986   | 0.262115  |              | 2.0571 0.0496306    | 0.2572    |
| Tpx2             | 0          | 0.0536992 | 1.79769e+308 | 0.0369415           | 1         |
| Hck_j1           | 0          | 0.157504  |              | 0 1                 | 1         |
| Pofut1_j2        | 4.40283    | 4.44117   |              | 0.0125111 0.918331  | 0.974532  |
| Gm14495_j4       | 0          | 0.0475862 | 1.79769e+308 | 0.13658             | 1         |
| Gm14495_j3       | 0.00318047 | 0.0847062 |              | 4.73516 0.365743    | 1         |
| XLOC_018486      | 0.0541932  | 0.257255  |              | 2.24702 0.118842    | 0.428914  |
| Cbfa2t2_j1       | 0.779632   | 0.527448  |              | -0.563766 0.406024  | 0.727612  |
| Zfp341_j1        | 4.15E-05   | 0.0868253 |              | 11.0325 0.939363    | 1         |
| Zfp341_j2        | 0.0230298  | 0.0995573 |              | 2.11202 0.080171    | 1         |
| Raly_j3          | 1.49853    | 1.82098   |              | 0.281161 0.407181   | 0.727764  |
| Raly_j7          | 6.14903    | 7.06434   |              | 0.200196 0.316439   | 0.660085  |
| Dynlrb1_j1       | 39.8935    | 50.8423   |              | 0.349875 0.038643   | 0.218957  |
| Acss2_j3         | 9.85036    | 13.0765   |              | 0 1                 | 1         |
| Myh7b_j6         | 0.0571786  | 0.112825  |              | 0 1                 | 1         |
| Myh7b_j8         | 0.185359   | 0.196034  |              | 0 1                 | 1         |
| Cep250_j1        | 0.175894   | 0.126846  |              | 0 1                 | 1         |

|                       |             |           |              |           |           |
|-----------------------|-------------|-----------|--------------|-----------|-----------|
| Cep250_j9             | 0.554797    | 0.560453  | 0            | 1         | 1         |
| Spag4_j5              | 0.106317    | 0.197856  | 0.896077     | 0.180548  | 0.520279  |
| Phf20_j3              | 0.690751    | 0.402079  | 0            | 1         | 1         |
| Phf20_j2              | 1.00055     | 0.889979  | 0            | 1         | 1         |
| Epb4.1l1_j3           | 0.0207995   | 0.0653063 | 0            | 1         | 1         |
| Epb4.1l1_j2           | 0.984254    | 1.21177   | 0            | 1         | 1         |
| Tgif2_j1              | 0           | 0.235501  | 1.79769e+308 | 0.0427646 | 0.234064  |
| Tgif2_j2              | 0.150472    | 0.186795  | 0.311962     | 0.815076  | 0.939756  |
| Src_j8                | 5.60864     | 7.4989    | 0            | 1         | 1         |
| Rprd1b_j3             | 0           | 0.170176  | 0            | 1         | 1         |
| Snhg11_j7             | 2.45083     | 2.88576   | 0.235683     | 0.222344  | 0.569453  |
| Snhg11_j6             | 0.763296    | 0.541695  | -0.494763    | 0.110146  | 0.412969  |
| Plcg1_j5              | 1.2829      | 2.26019   | 0.817034     | 1.20E-05  | 0.0003614 |
| XLOC_018538           | 0.000214461 | 0.108347  | 8.98073      | 0.862927  | 1         |
| XLOC_018538           | 0.0693755   | 0.115409  | 0.734254     | 0.515393  | 1         |
| 9430021M05Rik_j2      | 0.601894    | 0.71339   | 0.245182     | 0.609058  | 0.84604   |
| L3mbtl_j10            | 1.21417     | 0.987844  | -0.297618    | 0.234076  | 0.581478  |
| L3mbtl_j14            | 0.116458    | 0.14438   | 0.310058     | 0.629994  | 1         |
| L3mbtl_j17            | 3.19522     | 2.31057   | -0.467664    | 0.0095363 | 0.0826638 |
| L3mbtl_j18            | 1.63111     | 1.41807   | -0.201927    | 0.45117   | 0.756435  |
| XLOC_018552           | 0.0421518   | 0.0998512 | 1.24418      | 0.387704  | 1         |
| XLOC_018552           | 0.0486483   | 0.0533394 | 0.132812     | 0.927562  | 1         |
| Pabpc1l_j2            | 0.0443102   | 0.130572  | 1.55914      | 0.161339  | 1         |
| Stk4_j4               | 1.10747     | 2.25864   | 0            | 1         | 1         |
| Pigt_j2               | 0.0827841   | 0.12596   | 0.605537     | 0.635072  | 1         |
| Eya2_j2               | 0           | 0.0816108 | 1.79769e+308 | 0.0528068 | 1         |
| Ncoa3_j2              | 2.61846     | 2.78106   | 0            | 1         | 1         |
| Arfgef2_j3            | 0.897243    | 0.549184  | 0            | 1         | 1         |
| Ddx27_j1              | 1.95511     | 3.64375   | 0.898175     | 0.0090404 | 0.0794179 |
| 9230111E07Rik_j1      | 0.150393    | 0.201247  | 0.420235     | 0.439226  | 0.748796  |
| AK027991              | 0.107865    | 0.160782  | 0.575886     | 0.471913  | 0.769247  |
| Pard6b_j3             | 0.170562    | 0.46866   | 0            | 1         | 1         |
| XLOC_018599           | 0.211872    | 0.15799   | -0.423359    | 0.513757  | 0.793006  |
| Tshz2_j6              | 1.47981     | 0.880576  | 0            | 1         | 1         |
| Gm14273_j1            | 0.0768921   | 0.172331  | 1.16428      | 0.189793  | 0.53164   |
| Gm14273_j3            | 0.219077    | 0.439773  | 1.00532      | 0.0811448 | 0.34681   |
| OTTMUSG00000016609_j1 | 0.80206     | 0.998893  | 0.316619     | 0.642028  | 0.86192   |
| BC086906_j1           | 2.41154     | 2.07735   | -0.215211    | 0.128327  | 0.44647   |
| Lsm14b_j3             | 0.841971    | 1.7215    | 1.03182      | 0.0100778 | 0.086004  |
| Gtpbp5_j2             | 0.437401    | 0.398006  | -0.136167    | 0.824201  | 0.943114  |
| Gtpbp5_j3             | 0.215657    | 0.645985  | 1.58276      | 0.0156768 | 0.118446  |
| Adrm1_j1              | 2.83246     | 3.15423   | 0.155229     | 0.374354  | 0.707086  |
| Slco4a1_j4            | 0.0964976   | 0.139521  | 0.531916     | 0.606927  | 1         |
| Slco4a1_j8            | 0.0192948   | 0.106671  | 2.46688      | 0.158166  | 1         |
| 1600027N09Rik_j2      | 0           | 0.158995  | 0            | 1         | 1         |
| Col20a1_j4            | 8.713       | 8.72357   | 0.00174832   | 0.988388  | 0.996486  |
| Col20a1_j6            | 2.03485     | 2.23433   | 0.134919     | 0.534618  | 0.805772  |



|             |            |                        |            |           |           |
|-------------|------------|------------------------|------------|-----------|-----------|
| Pdpf_j6     | 2.51669    | 3.50576                | 0          | 1         | 1         |
| Zgpat_j5    | 0.295743   | 0.599833               | 0          | 1         | 1         |
| Tpd52l2_j4  | 12.4232    | 14.9547                | 0          | 1         | 1         |
| Oprl1_j2    | 0.76132    | 0.371082               | 0          | 1         | 1         |
| Myt1_j5     | 0          | 0.125761 1.79769e+308  |            | 0.0014165 | 1         |
| Myt1_j11    | 0.340607   | 0.311642               | -0.128218  | 0.759762  | 0.917259  |
| Myt1_j15    | 1.05584    | 1.59644                | 0.596466   | 0.0043629 | 0.0458187 |
| Pcmt2_j1    | 2.17018    | 1.98488                | -0.128767  | 0.437004  | 0.747347  |
| Suv39h2     | 0.255874   | 0.255262               | 0          | 1         | 1         |
| Prpf18_j2   | 4.06731    | 4.27183                | 0          | 1         | 1         |
| Mcm10_j1    | 0          | 0.150264 1.79769e+308  |            | 0.0496379 | 1         |
| Camk1d_j5   | 0          | 0.145595               | 0          | 1         | 1         |
| Camk1d_j6   | 0          | 0.0923689              | 0          | 1         | 1         |
| Dhtkd1_j7   | 0.0708577  | 0.102817               | 0.537085   | 0.540502  | 1         |
| Dhtkd1_j8   | 0          | 0.0493161 1.79769e+308 |            | 0.0441725 | 1         |
| Dhtkd1_j10  | 0.144964   | 0.141218               | -0.0377693 | 0.946318  | 0.98402   |
| Echdc3      | 0.118599   | 0.252635               | 1.09097    | 0.127978  | 0.445765  |
| Celf2_j10   | 0.21216    | 0.267009               | 0          | 1         | 1         |
| XLOC_018693 | 0.105398   | 0.229384               | 1.12192    | 0.309666  | 0.654275  |
| Fbxo18_j3   | 0          | 0.36011                | 0          | 1         | 1         |
| Rsu1_j1     | 3.04313    | 9.33874                | 0          | 1         | 1         |
| Cubn_j7     | 0.112594   | 0.351245               | 1.64135    | 0.0273681 | 0.174855  |
| Trdmt1_j3   | 0.346675   | 0.138983               | -1.31867   | 0.145893  | 0.473936  |
| Ptpla_j11   | 0.344652   | 0.132527               | -1.37886   | 0.173483  | 0.511284  |
| Ptpla_j12   | 0.435965   | 0.544728               | 0.321324   | 0.579808  | 0.83118   |
| Nsun6_j4    | 0.938066   | 1.09681                | 0.225554   | 0.457304  | 0.760373  |
| Nabl_j3     | 0          | 0.471742 1.79769e+308  |            | 6.76E-09  | 4.89E-07  |
| Pip4k2a_j4  | 0          | 1.62041                | 0          | 1         | 1         |
| Arhgap21_j5 | 2.62583    | 4.11268                | 0          | 1         | 1         |
| Spopl       | 0.78943    | 1.04178                | 0          | 1         | 1         |
| Spopl_j4    | 0.00820454 | 0.66049                | 0          | 1         | 1         |
| Cacna1b_j16 | 1.13222    | 1.35953                | 0.263957   | 1         | 1         |
| Cacna1b_j15 | 0.179694   | 0.497719               | 0          | 1         | 1         |
| Ehmt1_j8    | 0          | 0.158811 1.79769e+308  |            | 0.0005277 | 0.0085261 |
| Arrdc1_j1   | 1.83043    | 2.50919                | 0          | 1         | 1         |
| Cobra1_j1   | 6.11547    | 8.57825                | 0.488219   | 0.0244056 | 0.161584  |
| Tubb2c_j1   | 97.1576    | 121.598                | 0          | 1         | 1         |
| Ndor1_j12   | 0.275153   | 0.575581               | 0          | 1         | 1         |
| Ndor1_j13   | 0.957813   | 1.10385                | 0          | 1         | 1         |
| Dpp7_j4     | 6.04184    | 5.7692                 | 0          | 1         | 1         |
| BC029214_j4 | 3.11662    | 3.52926                | 0.179384   | 0.485507  | 0.777082  |
| Mamdc4_j5   | 0.0525521  | 0.0694353              | 0.401921   | 0.697962  | 1         |
| Gm996       | 1.02056    | 1.38378                | 0.439249   | 0.0506168 | 0.26051   |
| Camsap1_j8  | 2.48962    | 1.9043                 | 0          | 1         | 1         |
| Nacc2       | 2.13799    | 1.1039                 | 0          | 1         | 1         |
| Nacc2_j6    | 0.504927   | 0.324453               | 0          | 1         | 1         |
| Qsox2_j1    | 0.386187   | 0.699522               | 0.857069   | 0.0712959 | 0.321059  |

|                  |           |           |              |           |           |
|------------------|-----------|-----------|--------------|-----------|-----------|
| Card9_j3         | 0.0332659 | 0.207881  | 0            | 1         | 1         |
| Snapc4_j2        | 1.84591   | 2.28668   | 0            | 1         | 1         |
| Snapc4_j3        | 0.947457  | 0.92423   | 0            | 1         | 1         |
| Snapc4           | 1.05122   | 0.946595  | 0            | 1         | 1         |
| Inpp5e_j5        | 3.64162   | 3.30413   | 0            | 1         | 1         |
| Sec16a_j3        | 0.0637045 | 0.0550266 | 0            | 1         | 1         |
| Sec16a_j4        | 2.94819   | 3.3976    | 0            | 1         | 1         |
| Sec16a_j5        | 2.76968   | 3.16708   | 0            | 1         | 1         |
| Notch1_j1        | 0.0527011 | 0.20958   | 1.99159      | 7.51E-05  | 0.0016803 |
| Agpat2_j2        | 0.637112  | 1.70682   | 1.42169      | 0.000255  | 0.0046922 |
| Surf1_j3         | 12.5935   | 15.049    | 0.256987     | 0.0063989 | 0.0615382 |
| Gm13399_j3       | 0         | 0.0875625 | 1.79769e+308 | 0.124913  | 1         |
| VAV2_j7          | 0.129839  | 0.753369  | 0            | 1         | 1         |
| VAV2_j9          | 2.78504   | 2.88503   | 0            | 1         | 1         |
| Gm13373_j6       | 0.200274  | 0.152667  | -0.391582    | 0.725207  | 0.902439  |
| Ccbl1_j4         | 0         | 0.29501   | 1.79769e+308 | 0.0063814 | 0.0614449 |
| Sh3glb2_j3       | 7.30912   | 6.74711   | 0            | 1         | 1         |
| 1700001O22Rik_j4 | 0.0579671 | 0.158848  | 1.45434      | 0.270398  | 0.61953   |
| Fnbp1            | 6.75518   | 5.73459   | 0            | 1         | 1         |
| Dnm1_j8          | 19.9961   | 19.3461   | 0            | 1         | 1         |
| Dnm1_j10         | 21.7275   | 15.9597   | 0            | 1         | 1         |
| Dnm1_j9          | 81.9093   | 67.3751   | 0            | 1         | 1         |
| Cdk9_j5          | 0         | 0.0961565 | 1.79769e+308 | 0.0735322 | 1         |
| Lrsam1_j1        | 3.76266   | 16.8171   | 0            | 1         | 1         |
| Slc2a8_j7        | 0.566402  | 0.54953   | 0            | 1         | 1         |
| Slc2a8_j6        | 1.53909   | 1.43337   | 0            | 1         | 1         |
| Slc2a8_j5        | 0.873545  | 1.49038   | 0            | 1         | 1         |
| AK048710_j1      | 0         | 0.109891  | 1.79769e+308 | 0.0478861 | 1         |
| Gapvd1_j10       | 0         | 0.150914  | 0            | 1         | 1         |
| Hc_j3            | 0.0283512 | 0.0690204 | 1.28362      | 0.342992  | 1         |
| Rab14_j2         | 6.19182   | 9.12171   | 0            | 1         | 1         |
| Stom_j1          | 6.53459   | 9.84812   | 0            | 1         | 1         |
| Ggta1_j4         | 0.70294   | 0.238113  | 0            | 1         | 1         |
| Rbm18            | 1.03515   | 1.11131   | 0            | 1         | 1         |
| Rc3h2_j1         | 0.457445  | 0.456745  | -0.00220839  | 0.993264  | 0.997985  |
| Strbp_j3         | 0.566153  | 0.339185  | 0            | 1         | 1         |
| Dennd1a_j1       | 0.437447  | 1.06168   | 0            | 1         | 1         |
| Nr6a1_j1         | 0.142131  | 0.284564  | 1.00153      | 0.0479244 | 0.25165   |
| Nr6a1            | 0.211194  | 0.238355  | 0.174545     | 0.670836  | 0.8755    |
| Scai_j3          | 0.0271064 | 0.0600742 | 0            | 1         | 1         |
| Lrp1b_j1         | 0         | 0.0670626 | 1.79769e+308 | 0.0938411 | 1         |
| Lrp1b_j2         | 0.319965  | 0.251728  | -0.34605     | 0.392979  | 0.718965  |
| Lrp1b_j8         | 0.0618715 | 0.0816259 | 0.399752     | 0.75558   | 1         |
| Mmadhc_j3        | 1.65622   | 3.66015   | 0            | 1         | 1         |
| Mmadhc_j4        | 0.583703  | 0.560743  | 0            | 1         | 1         |
| Nmi_j5           | 0         | 0.0825707 | 0            | 1         | 1         |
| Nmi              | 0.367554  | 1.01233   | 0            | 1         | 1         |

|                  |            |           |              |           |           |
|------------------|------------|-----------|--------------|-----------|-----------|
| Cacnb4_j1        | 5.71729    | 4.09965   | 0            | 1         | 1         |
| Nr4a2            | 0.236339   | 0.528667  | 1.16151      | 0.0053683 | 0.0535281 |
| Ccdc148_j4       | 0.317952   | 0.28033   | -0.181683    | 0.764211  | 0.919079  |
| Baz2b_j12        | 0.112191   | 0.198926  | 0.826275     | 0.0564399 | 0.278029  |
| Ly75_j1          | 1.12651    | 0.640497  | -0.814593    | 0.0078297 | 0.0714618 |
| Ly75_j2          | 0.113775   | 0.514294  | 2.17642      | 1.94E-05  | 0.0005401 |
| Pla2r1_j3        | 0.00373259 | 0.0659303 | 4.14269      | 0.0402172 | 1         |
| Rbms1_j9         | 0.246593   | 0.0802335 | 0            | 1         | 1         |
| Gm13582_j1       | 0.0607496  | 0.146451  | 1.26947      | 0.216479  | 1         |
| Ifih1_j1         | 0.350376   | 0.528589  | 0.593241     | 0.0335074 | 0.200047  |
| Kcnh7_j3         | 0.401366   | 0.277964  | 0            | 1         | 1         |
| Cobl1_j9         | 0          | 0.0724016 | 0            | 1         | 1         |
| Cobl1_j10        | 0          | 0.145837  | 0            | 1         | 1         |
| Scn7a_j2         | 53.7658    | 54.2212   | 0            | 1         | 1         |
| Stk39_j2         | 0          | 0.464897  | 0            | 1         | 1         |
| AK086439_j3      | 0.0578653  | 0.16748   | 1.53322      | 0.191495  | 0.533648  |
| Sp3_j3           | 1.26531    | 0.550357  | -1.20105     | 0.0039846 | 0.042749  |
| Ola1_j1          | 0.143292   | 0.111682  | -0.359565    | 0.750849  | 0.913583  |
| Wipf1_j2         | 5.02882    | 4.99276   | 0            | 1         | 1         |
| Chn1_j3          | 51.785     | 49.1198   | 0            | 1         | 1         |
| Lnp_j1           | 0.361705   | 0.378782  | 0            | 1         | 1         |
| Fkbp7_j3         | 0.539475   | 0.815195  | 0.595589     | 0.262432  | 0.611546  |
| Ccdc141_j4       | 0.841674   | 2.28919   | 0            | 1         | 1         |
| Ccdc141_j5       | 9.21E-05   | 0.375011  | 0            | 1         | 1         |
| Sestd1_j4        | 0.208293   | 0.309588  | 0            | 1         | 1         |
| Zfp385b_j1       | 1.67553    | 2.10088   | 0            | 1         | 1         |
| Cwc22_j2         | 0.0610768  | 0.10067   | 0.720944     | 0.570973  | 1         |
| Cerkl_j4         | 0.208033   | 0.168147  | -0.307092    | 0.716136  | 0.897523  |
| XLOC_018962      | 0.0592545  | 0.0807352 | 0.446272     | 0.707471  | 1         |
| Nckap1_j5        | 42.3823    | 54.2609   | 0            | 1         | 1         |
| Tfpi_j6          | 0          | 0.0803716 | 1.79769e+308 | 0.127304  | 1         |
| Tmx2_j2          | 0.975423   | 1.02269   | 0            | 1         | 1         |
| Tmx2_j1          | 3.73047    | 3.68902   | 0            | 1         | 1         |
| Clp1             | 0.300885   | 0.60907   | 1.0174       | 0.134412  | 0.456305  |
| Serping1_j2      | 0.0320379  | 0.270014  | 0            | 1         | 1         |
| P2rx3_j3         | 14.2483    | 15.314    | 0            | 1         | 1         |
| P2rx3_j4         | 0.394506   | 1.13368   | 0            | 1         | 1         |
| P2rx3_j5         | 0.100102   | 0.773003  | 0            | 1         | 1         |
| Madd_j8          | 0.255233   | 0.414624  | 0            | 1         | 1         |
| Madd_j12         | 2.43379    | 2.08436   | 0            | 1         | 1         |
| 1110051M20Rik_j2 | 0.695291   | 1.83922   | 1.4034       | 0.0003047 | 0.0054133 |
| 1110051M20Rik_j1 | 0.93607    | 0.847923  | -0.142683    | 0.750439  | 0.913404  |
| Creb3l1_j4       | 1.06903    | 1.43162   | 0.421343     | 0.309205  | 0.653897  |
| Mapk8ip1_j7      | 5.25456    | 10.8755   | 0            | 1         | 1         |
| Tspan18_j1       | 0.0874009  | 0.24206   | 0            | 1         | 1         |
| Ext2_j1          | 0.751348   | 3.63118   | 0            | 1         | 1         |
| Accsl_j2         | 0.0478182  | 0.239143  | 2.32224      | 0.0203259 | 0.14243   |

|                  |             |           |              |           |           |
|------------------|-------------|-----------|--------------|-----------|-----------|
| Alkbh3_j1        | 0.0382849   | 0.0501511 | 0.389508     | 0.770332  | 1         |
| XLOC_019031      | 0.129444    | 0.234207  | 0.85546      | 0.428605  | 0.742464  |
| Trim44_j3        | 15.4862     | 16.5086   | 0            | 1         | 1         |
| Cat_j3           | 7.11383     | 12.5254   | 0            | 1         | 1         |
| Nat10_j3         | 0.523607    | 0.456603  | 0            | 1         | 1         |
| Caprin1_j7       | 1.03618     | 2.66974   | 0            | 1         | 1         |
| D430041D05Rik_j2 | 0.000560933 | 0.45672   | 9.66927      | 0.071043  | 0.320458  |
| Depdc7_j1        | 0.175036    | 0.444801  | 1.34551      | 0.0646296 | 0.302211  |
| Depdc7_j2        | 0.0154087   | 0.272627  | 4.14511      | 0.106461  | 0.405199  |
| Elp4_j2          | 0           | 0.148432  | 1.79769e+308 | 0.0677888 | 1         |
| AK084494_j1      | 0           | 0.138618  | 1.79769e+308 | 0.101748  | 1         |
| Mett5d1_j3       | 0           | 0.622924  | 1.79769e+308 | 1.63E-05  | 0.0004693 |
| Ryr3_j7          | 0.535547    | 0.497399  | -0.106609    | 0.703665  | 0.891515  |
| Ryr3_j11         | 0           | 0.0484203 | 1.79769e+308 | 0.125349  | 1         |
| Meis2_j5         | 0           | 0.671095  | 0            | 1         | 1         |
| Srp14_j1         | 39.523      | 38.313    | 0            | 1         | 1         |
| Bmf_j4           | 0.238379    | 0.592326  | 1.31313      | 0.0002793 | 0.0050423 |
| Plcb2_j1         | 0.0325786   | 0.0577867 | 0.826814     | 0.564376  | 1         |
| Fam82a2_j1       | 0.628839    | 0.783239  | 0.316762     | 0.527737  | 0.801757  |
| Ino80_j2         | 0.213459    | 0.48629   | 0            | 1         | 1         |
| Exd1_j5          | 0.0204814   | 0.106435  | 2.37758      | 0.160711  | 1         |
| Rpap1_j3         | 0           | 0.165776  | 0            | 1         | 1         |
| Rpap1_j4         | 0.180111    | 0.13533   | 0            | 1         | 1         |
| Spnb5_j8         | 0.111117    | 0.148405  | 0.41747      | 0.451462  | 1         |
| Spnb5_j10        | 0.106607    | 0.11361   | 0.0917852    | 0.854938  | 1         |
| Spnb5_j9         | 0           | 0.0847451 | 1.79769e+308 | 0.0010189 | 1         |
| Spnb5_j4         | 0.0503119   | 0.178112  | 1.82381      | 0.0651502 | 0.303974  |
| Spnb5_j2         | 0.11159     | 0.190554  | 0.771987     | 0.390233  | 0.717194  |
| Pla2g4e_j6       | 0.0636228   | 0.109234  | 0.779801     | 0.448197  | 1         |
| Pla2g4e_j7       | 0.112525    | 0.027233  | -2.04682     | 0.140466  | 1         |
| Tmem87a_j1       | 7.48429     | 6.37288   | 0            | 1         | 1         |
| Ubr1_j2          | 0.261574    | 0.865229  | 0            | 1         | 1         |
| Trp53bp1_j3      | 2.1945      | 2.23132   | 0            | 1         | 1         |
| Trp53bp1_j4      | 0.52305     | 0.764339  | 0            | 1         | 1         |
| Ppip5k1_j4       | 0.11178     | 0.0844096 | 0            | 1         | 1         |
| Mfap1a_j1        | 2.01631     | 2.3045    | 0.192733     | 0.385106  | 0.713848  |
| Mfap1a_j4        | 0.12611     | 0.219061  | 0.796643     | 0.133289  | 0.454257  |
| Frmf5_j1         | 0.301144    | 0.514749  | 0            | 1         | 1         |
| Spg11_j3         | 2.76492     | 2.3436    | -0.238513    | 0.287831  | 0.635813  |
| Spg11_j4         | 3.54415     | 4.57195   | 0.367371     | 0.0196585 | 0.139199  |
| Duoxa1_j5        | 0.159458    | 0.292571  | 0.875611     | 0.488027  | 0.778578  |
| Shf_j3           | 7.35572     | 8.63049   | 0.230576     | 0.285641  | 0.634449  |
| Slc30a4          | 0.213553    | 0.229201  | 0.102017     | 0.827904  | 0.944579  |
| Myef2_j1         | 1.96431     | 1.73974   | -0.175151    | 0.235592  | 0.582812  |
| Fbn1_j8          | 0.0571588   | 0.0338478 | -0.755913    | 0.61255   | 1         |
| Fbn1_j7          | 0           | 0.0811289 | 1.79769e+308 | 0.0352102 | 1         |
| 4930525F21Rik_j1 | 0.75883     | 0.651287  | 0            | 1         | 1         |

|                  |             |           |              |           |           |
|------------------|-------------|-----------|--------------|-----------|-----------|
| Hdc_j2           | 0           | 0.323586  | 1.79769e+308 | 0.0001465 | 0.002953  |
| Gabpb1_j5        | 0.0546817   | 0.138621  |              | 0         | 1         |
| Gabpb1_j6        | 0.0266208   | 0.546226  |              | 0         | 1         |
| 2010106G01Rik_j1 | 0           | 0.139395  |              | 0         | 1         |
| Itpripl1         | 0.0963576   | 0.117057  | 0.280736     | 0.728112  | 1         |
| Zfp661           | 0.323883    | 0.711037  | 1.13445      | 0.0009523 | 0.013746  |
| Mall_j1          | 0.000286118 | 0.119352  | 8.70439      | 0.880736  | 1         |
| Gm14012_j1       | 0           | 0.0521734 | 1.79769e+308 | 0.111114  | 1         |
| Gm14005_j2       | 0           | 0.269322  | 1.79769e+308 | 0.0438328 | 0.238299  |
| Anapc1_j1        | 0.100868    | 0.125062  | 0.310175     | 0.590246  | 1         |
| Anapc1_j4        | 0           | 0.126021  | 1.79769e+308 | 4.11E-05  | 1         |
| Gm14029_j1       | 0.262333    | 0.352315  | 0.42547      | 0.621929  | 0.852009  |
| Slc4a11          | 4.04783     | 4.09905   | 0            | 1         | 1         |
| 4930402H24Rik_j1 | 1.67162     | 1.95654   | 0            | 1         | 1         |
| A730017L22Rik_j4 | 0.225662    | 0.26883   | 0.252527     | 0.637964  | 0.859883  |
| Gfra4_j5         | 11.5269     | 9.79164   | -0.235381    | 0.197594  | 0.540596  |
| Adam33_j15       | 0.0348211   | 0.102275  | 1.55442      | 0.160105  | 1         |
| Slc23a2_j1       | 7.698       | 8.75643   | 0            | 1         | 1         |
| Pcna_j6          | 0.163943    | 0.26305   | 0.682145     | 0.225392  | 0.572498  |
| Gpcpd1_j5        | 0.280474    | 0.137733  | 0            | 1         | 1         |
| Pak7_j2          | 0.0220152   | 0.362285  | 4.04055      | 0.0022401 | 0.0272481 |
| Pak7_j6          | 0           | 0.0482037 | 1.79769e+308 | 0.122151  | 1         |
| Mkks             | 1.6419      | 2.44293   | 0            | 1         | 1         |
| Mkks             | 1.70336     | 1.21671   | 0            | 1         | 1         |
| Jag1_j1          | 0.0359595   | 0.0816056 | 0            | 1         | 1         |
| Tasp1_j3         | 0.130906    | 0.55663   | 0            | 1         | 1         |
| Flrt3_j1         | 0           | 0.909847  | 1.79769e+308 | 1.37E-09  | 1.13E-07  |
| Kif16b_j2        | 3.78257     | 3.34956   | -0.175394    | 0.405793  | 0.727432  |
| Kif16b_j3        | 0.446175    | 0.653303  | 0.550143     | 0.107702  | 0.407901  |
| Rrbp1_j2         | 0.936661    | 0.932784  | 0            | 1         | 1         |
| 6330439K17Rik_j9 | 0.0243716   | 0.0933275 | 0            | 1         | 1         |
| 6330439K17Rik_j8 | 0           | 0.296141  | 0            | 1         | 1         |
| XLOC_019220      | 0           | 0.112029  | 1.79769e+308 | 0.047286  | 1         |
| Zfp120_j1        | 0           | 0.204642  | 0            | 1         | 1         |
| Acss1_j2         | 0.389466    | 0.471245  | 0.27498      | 0.535795  | 0.80631   |
| Abhd12_j1        | 97.4652     | 82.3948   | -0.242334    | 0.0051282 | 0.0516948 |
| Ninl_j8          | 0.0879485   | 0.139027  | 0.66063      | 0.385168  | 1         |
| Snph             | 0           | 0.102021  | 0            | 1         | 1         |
| Bcl2l1_j1        | 0           | 2.77539   | 0            | 1         | 1         |
| Plagl2_j2        | 0           | 0.0568753 | 1.79769e+308 | 0.0215436 | 1         |
| 8430427H17Rik_j1 | 0.0449206   | 0.0744402 | 0            | 1         | 1         |
| Snta1_j1         | 2.51305     | 3.4237    | 0.446119     | 0.122176  | 0.435216  |
| Eif2s2_j3        | 0           | 0.0645096 | 1.79769e+308 | 0.114472  | 1         |
| Eif2s2_j5        | 0.0990654   | 0.0822658 | -0.26809     | 0.837133  | 1         |
| Eif2s2_j6        | 1.57456     | 1.25569   | -0.326466    | 0.506029  | 0.788576  |
| Ahcy_j2          | 0           | 0.611912  | 1.79769e+308 | 0.0002764 | 0.004999  |
| Ahcy_j5          | 0.182072    | 0.251067  | 0.463565     | 0.349179  | 0.687028  |

|                  |           |           |              |           |           |
|------------------|-----------|-----------|--------------|-----------|-----------|
| Ncoa6_j2         | 4.93448   | 6.56971   | 0.412932     | 0.0725802 | 0.32416   |
| Trpc4ap_j1       | 21.1394   | 24.5614   | 0            | 1         | 1         |
| Edem2_j2         | 0.320243  | 0.316731  | -0.0159107   | 0.985795  | 0.995741  |
| Uqcc_j3          | 0.341534  | 0.416969  | 0            | 1         | 1         |
| 6430550D23Rik_j3 | 0.187465  | 0.19013   | 0.0203633    | 0.98063   | 0.994152  |
| Rbm39_j4         | 19.377    | 19.2375   | 0            | 1         | 1         |
| AK015092_j1      | 0.326624  | 0.257525  | -0.342921    | 0.535249  | 0.806124  |
| AK015092         | 0.0616065 | 0.0479548 | -0.361407    | 0.855341  | 1         |
| Rbl1_j5          | 0         | 0.0940585 | 1.79769e+308 | 0.0396159 | 1         |
| Rbl1_j7          | 0.0920782 | 0.186619  | 1.01916      | 0.345171  | 0.684606  |
| Bicap_j1         | 18.8346   | 27.416    | 0            | 1         | 1         |
| 9430008C03Rik_j9 | 0.241358  | 0.296193  | 0.29536      | 0.732948  | 0.90578   |
| Chd6_j3          | 6.6679    | 5.5355    | 0            | 1         | 1         |
| Ptprt_j1         | 0.0996343 | 0         | 0            | 1         | 1         |
| Ada_j5           | 0.547698  | 0.97457   | 0.831386     | 0.0571432 | 0.280101  |
| Tomm34_j1        | 0.342146  | 1.19288   | 0            | 1         | 1         |
| Matn4_j2         | 4.42631   | 5.4546    | 0.301367     | 0.125705  | 0.441571  |
| Cdh22_j3         | 0         | 0.059092  | 1.79769e+308 | 0.0410055 | 1         |
| Zfp663_j3        | 0.445254  | 0.312766  | -0.509543    | 0.226619  | 0.573689  |
| Slc13a3_j2       | 0.108551  | 0.11759   | 0.115396     | 0.887936  | 1         |
| Zmynd8_j8        | 0.561318  | 1.01118   | 0            | 1         | 1         |
| Zmynd8_j6        | 0.0698728 | 0.237713  | 0            | 1         | 1         |
| Zmynd8_j7        | 0.616627  | 1.2765    | 0            | 1         | 1         |
| Zmynd8_j9        | 0.655048  | 0.367604  | 0            | 1         | 1         |
| Gm14267_j3       | 0         | 0.0500985 | 1.79769e+308 | 0.121263  | 1         |
| Gm14267_j6       | 0.126415  | 0.109608  | -0.205805    | 0.809251  | 1         |
| Ptgis_j3         | 0.265402  | 0.231288  | -0.198489    | 0.685679  | 0.882783  |
| Fam65c_j3        | 0.0531844 | 0.187708  | 1.81941      | 0.0190781 | 0.136374  |
| Dpm1             | 20.2951   | 19.2918   | 0            | 1         | 1         |
| Nfatc2_j1        | 0.0420494 | 0.103987  | 1.30625      | 0.09031   | 1         |
| Atp9a_j8         | 10.4366   | 10.458    | 0            | 1         | 1         |
| Zfp64_j1         | 0.984972  | 0.920133  | -0.0982397   | 0.6982    | 0.888784  |
| Zfp64_j1         | 1.70751   | 2.06753   | 0.276009     | 0.320225  | 0.663587  |
| Cyp24a1          | 0.0850077 | 1.02949   | 3.59819      | 0         | 0         |
| Zbp1_j3          | 0         | 0.0572408 | 1.79769e+308 | 0.138717  | 1         |
| Ppp4r1l-ps_j11   | 0.510336  | 0.8803    | 0            | 1         | 1         |
| Ppp4r1l-ps_j12   | 0.989746  | 1.14901   | 0            | 1         | 1         |
| Ctsz_j1          | 17.1205   | 21.509    | 0.329219     | 0.0338113 | 0.20127   |
| AK166773_j1      | 0.383945  | 0.508229  | 0.404578     | 0.571245  | 0.826767  |
| Gm14326_j3       | 2.32044   | 2.06914   | -0.165362    | 0.779055  | 0.925601  |
| Gm14326_j4       | 2.80277   | 2.99439   | 0.0954062    | 0.861687  | 0.956305  |
| Sycp2_j2         | 9.01E-06  | 0.108971  | 13.5627      | 0.993429  | 1         |
| Lama5_j2         | 0.0589456 | 0.177158  | 1.58758      | 0.0025601 | 0.0304195 |
| Cables2_j13      | 0         | 0.0670041 | 0            | 1         | 1         |
| AK045814_j2      | 0         | 0.199403  | 1.79769e+308 | 0.0149213 | 0.114486  |
| Dido1_j2         | 0.742743  | 0.555961  | 0            | 1         | 1         |
| Eef1a2_j1        | 8.01752   | 5.95596   | 0            | 1         | 1         |

|                  |           |           |               |           |           |
|------------------|-----------|-----------|---------------|-----------|-----------|
| Srms_j2          | 0.0635613 | 0.0418952 | -0.601362     | 0.755736  | 1         |
| BC006779_j12     | 0.0811101 | 0.155293  | 0.937042      | 0.0690296 | 1         |
| Stmn3_j4         | 316.408   | 321.476   | 0             | 1         | 1         |
| Zbtb46_j6        | 0         | 0.378145  | 1.79769e+308  | 0.0001749 | 0.0034389 |
| Znf512b_j2       | 0.466164  | 0.235949  | 0             | 1         | 1         |
| Zfhx4_j1         | 0.129786  | 0.0721114 | -0.847838     | 0.365157  | 1         |
| Pkia             | 10.4937   | 11.5753   | 0             | 1         | 1         |
| Pkia_j1          | 18.2197   | 14.8001   | 0             | 1         | 1         |
| Fam164a          | 26.0159   | 23.4699   | -0.148584     | 0.180322  | 0.519982  |
| Stmn2            | 770.372   | 1138.54   | 0.563552      | 3.78E-07  | 1.74E-05  |
| Zbtb10           | 2.06025   | 2.12381   | 0.043832      | 0.763338  | 0.918505  |
| XLOC_020752      | 0.0766304 | 0.111153  | 0.536552      | 0.520787  | 1         |
| Fabp5            | 5.66112   | 7.08205   | 0             | 1         | 1         |
| Fabp5_j1         | 7.29774   | 14.0698   | 0             | 1         | 1         |
| Raly1_j8         | 26.1848   | 23.8772   | -0.133099     | 1         | 1         |
| Lrrcc1           | 2.63609   | 2.23985   | -0.234999     | 0.096119  | 0.38285   |
| Lrrcc1           | 0.865242  | 0.857836  | -0.0124021    | 0.964586  | 0.989999  |
| E2f5             | 1.93545   | 2.04895   | 0             | 1         | 1         |
| Car13_j1         | 0.35496   | 7.72E-05  | 0             | 1         | 1         |
| Car13            | 2.17878   | 1.97858   | 0             | 1         | 1         |
| Car13_j2         | 0.839894  | 1.54547   | 0             | 1         | 1         |
| Car3             | 1.44173   | 9.40874   | 2.70621       | 0         | 0         |
| Car2_j1          | 0.546641  | 0.558859  | 0.0318903     | 0.963673  | 0.989789  |
| Car2             | 36.9901   | 26.1554   | -0.500031     | 6.77E-07  | 2.96E-05  |
| Ythdf3           | 7.72004   | 7.8941    | 0.0321663     | 0.807202  | 0.936458  |
| Ythdf3           | 1.73062   | 1.4657    | -0.239696     | 0.374085  | 0.706953  |
| Ythdf3           | 2.18496   | 1.1348    | -0.945169     | 0.0009586 | 0.0138288 |
| 2610100L16Rik_j1 | 0.308676  | 0.068685  | -2.16803      | 0.0586773 | 0.284705  |
| 2610100L16Rik_j4 | 0.128765  | 0         | -1.79769e+308 | 0.0506928 | 1         |
| 2610100L16Rik_j5 | 0.132926  | 0.0845425 | -0.652873     | 0.619283  | 1         |
| Mtfr1            | 1.26655   | 0.727229  | 0             | 1         | 1         |
| Mtfr1            | 3.01314   | 2.86071   | 0             | 1         | 1         |
| Mtfr1_j1         | 1.4865    | 1.5974    | 0             | 1         | 1         |
| Dnajc5b          | 0.120339  | 0.0632447 | -0.928084     | 0.469977  | 1         |
| Dnajc5b_j1       | 0.203677  | 0.233164  | 0.195064      | 0.803234  | 0.934684  |
| Dnajc5b          | 0.256151  | 0.251542  | -0.0261954    | 0.967462  | 0.990788  |
| Cp_j1            | 2.75425   | 3.64837   | 0             | 1         | 1         |
| XLOC_020778      | 0.141442  | 0.0459719 | -1.62139      | 0.174886  | 0.513197  |
| XLOC_020778      | 0.0763893 | 0         | -1.79769e+308 | 0.00701   | 1         |
| Tbl1xr1_j4       | 1.20594   | 2.20398   | 0             | 1         | 1         |
| Nceh1            | 17.0814   | 19.2518   | 0.172566      | 0.0550762 | 0.27383   |
| Tnfsf10_j1       | 0.133506  | 0.0420618 | -1.66632      | 0.071025  | 1         |
| Tnfsf10          | 0.225692  | 0.197151  | -0.195053     | 0.614492  | 0.847708  |
| Tnfsf10_j4       | 0.148503  | 1.98E-05  | -12.872       | 0.95986   | 0.988566  |
| Pld1             | 0.431567  | 0.591082  | 0.453774      | 0.130694  | 0.450129  |
| Pld1_j3          | 0.134218  | 0.0708073 | -0.922607     | 0.203991  | 1         |
| Pld1             | 0.0778992 | 0.0738164 | -0.0776675    | 0.92038   | 1         |

|             |           |                 |            |           |           |
|-------------|-----------|-----------------|------------|-----------|-----------|
| Pld1_j7     | 0.146249  | 0.442901        | 1.59856    | 0.002562  | 0.0304205 |
| Tnik        | 1.09843   | 1.47843         | 0          | 1         | 1         |
| Eif5a2_j1   | 6.01334   | 5.59271         | 0          | 1         | 1         |
| Eif5a2      | 38.3672   | 25.2875         | 0          | 1         | 1         |
| Rpl22l1_j4  | 1.27653   | 0.000133964     | -13.2181   | 0.953693  | 0.98654   |
| Rpl22l1_j7  | 1.70668   | 1.65729         | -0.0423622 | 0.923914  | 0.976306  |
| XLOC_020790 | 0.233926  | 0.113598        | -1.04211   | 0.049435  | 0.256513  |
| XLOC_020790 | 0.295069  | 0.13781         | -1.09838   | 0.0261492 | 0.169726  |
| Egfem1_j1   | 0.239196  | 0.0393896       | -2.60231   | 0.0424481 | 0.232829  |
| Egfem1_j3   | 0.373322  | 0.544896        | 0.54556    | 0.14475   | 0.472185  |
| Egfem1_j8   | 0.0700848 | 0.0333298       | -1.07229   | 0.463078  | 1         |
| Egfem1_j7   | 0.220061  | 0.164793        | -0.417249  | 0.570486  | 0.82635   |
| Egfem1_j15  | 1.10318   | 0.649174        | -0.764991  | 0.0213829 | 0.147441  |
| Mynn        | 1.39045   | 1.34679         | -0.0460244 | 0.797655  | 0.932743  |
| Sec62       | 40.1186   | 40.3402         | 0.00794672 | 0.929631  | 0.978386  |
| Gpr160_j5   | 0.565316  | 0.644678        | 0.18952    | 0.63804   | 0.859938  |
| Gpr160_j7   | 0.452362  | 0.42775         | -0.0807118 | 0.864613  | 0.956931  |
| Prkci       | 2.5758    | 1.94333         | 0          | 1         | 1         |
| Prkci_j3    | 1.79876   | 1.29591         | 0          | 1         | 1         |
| Skil        | 0.772699  | 0.454732        | -0.764891  | 0.0056173 | 0.0555114 |
| Cldn11      | 0.997798  | 1.51742         | 0.604797   | 0.0096457 | 0.0834561 |
| AK162138_j1 | 0.133095  | 0.081841        | 0          | 1         | 1         |
| AK162138_j3 | 0.0526154 | 0               | 0          | 1         | 1         |
| AK162138_j4 | 0.254923  | 0.240834        | 0          | 1         | 1         |
| Kcnmb2      | 0.54135   | 0.527885        | -0.0363384 | 0.921278  | 0.975363  |
| Kcnmb2_j2   | 1.04574   | 1.30804         | 0.322885   | 0.219456  | 0.566015  |
| Kcnmb2_j3   | 0.201788  | 0 -1.79769e+308 | 0.0003063  | 0.0003063 | 0.0054388 |
| Pik3ca_j1   | 10.3191   | 9.82822         | -0.0703158 | 0.466994  | 0.766531  |
| Zfp639      | 0.351136  | 0.378494        | 0          | 1         | 1         |
| Zfp639_j1   | 0.0594534 | 0.104588        | 0          | 1         | 1         |
| Mfn1_j2     | 0.131601  | 0.0949728       | 0          | 1         | 1         |
| Mfn1_j4     | 0.165925  | 0.159772        | 0          | 1         | 1         |
| Actl6a      | 4.18015   | 4.2015          | 0          | 1         | 1         |
| Ndufb5      | 13.7418   | 11.6813         | 0          | 1         | 1         |
| Usp13       | 1.28479   | 0.941891        | 0          | 1         | 1         |
| Usp13_j4    | 1.54855   | 2.64698         | 0          | 1         | 1         |
| Ttc14       | 3.80749   | 3.68892         | -0.0456429 | 0.675956  | 0.878059  |
| Fxr1        | 6.41138   | 3.1996          | 0          | 1         | 1         |
| Fxr1        | 25.6116   | 23.7355         | 0          | 1         | 1         |
| Sox2ot      | 0.146998  | 0.00204518      | -6.16742   | 0.154864  | 0.488084  |
| Sox2        | 7.35779   | 6.97187         | -0.0777279 | 0.535812  | 0.80631   |
| Atp11b_j6   | 2.49835   | 2.51004         | 0.00673259 | 0.965572  | 0.990085  |
| Atp11b_j5   | 2.05551   | 1.19744         | -0.779549  | 7.54E-05  | 0.0016839 |
| Atp11b      | 2.66169   | 3.80453         | 0.515373   | 0.0007682 | 0.0115852 |
| Gm15952_j1  | 0.360452  | 0.138211        | -1.38294   | 0.155871  | 0.489175  |
| Acad9       | 3.13041   | 3.08214         | -0.0224205 | 0.841443  | 0.949916  |
| D3Erttd254e | 1.26144   | 1.15096         | 0          | 1         | 1         |



|                   |           |                       |            |           |           |
|-------------------|-----------|-----------------------|------------|-----------|-----------|
| Exosc9            | 17.321    | 19.3017               | 0.156203   | 0.153528  | 0.486123  |
| 4932438A13Rik_j4  | 0.227391  | 0.291104              | 0.356358   | 0.169843  | 0.506815  |
| 4932438A13Rik_j10 | 0.114129  | 0 -1.79769e+308       |            | 4.84E-06  | 1         |
| 4932438A13Rik_j12 | 5.25595   | 4.67848               | -0.167909  | 0.200901  | 0.544315  |
| Gm12582           | 1.91015   | 2.36748               | 0.309662   | 0.253157  | 0.601203  |
| Bbs12             | 0         | 0.613111 1.79769e+308 |            | 1.55E-07  | 7.91E-06  |
| Bbs12_j1          | 0.214907  | 0.18727               | -0.198594  | 0.759611  | 0.91718   |
| Fgf2              | 0.313728  | 0.441865              | 0.494089   | 0.113111  | 0.418638  |
| Spata5            | 0.488096  | 0.525634              | 0.106893   | 0.66181   | 0.871768  |
| Spata5_j5         | 0.632406  | 0.427338              | -0.565474  | 0.393951  | 0.719791  |
| Intu_j4           | 0.165639  | 0.16346               | -0.0191058 | 0.973979  | 0.992504  |
| Hspa4l            | 10.2235   | 4.43188               | 0          | 1         | 1         |
| 3110057O12Rik     | 0.460311  | 0.312825              | 0          | 1         | 1         |
| 3110057O12Rik_j2  | 0.190636  | 0.0184722             | -3.36739   | 0.0144236 | 0.111847  |
| Larp1b            | 5.99065   | 6.052                 | 0.0146992  | 0.902509  | 0.968921  |
| Larp1b_j1         | 0.0982625 | 0.064995              | -0.596312  | 0.59726   | 1         |
| Larp1b_j4         | 0.185573  | 0.271104              | 0.546863   | 0.646371  | 0.863665  |
| Phf17_j1          | 1.22776   | 1.00762               | 0          | 1         | 1         |
| Phf17             | 0.0485776 | 0                     | 0          | 1         | 1         |
| D3Ert751e         | 2.4729    | 1.1324                | 0          | 1         | 1         |
| D3Ert751e         | 0.149353  | 0.0454356             | 0          | 1         | 1         |
| Pcdh10            | 5.38969   | 4.19349               | 0          | 1         | 1         |
| Pcdh10            | 3.08178   | 2.69513               | 0          | 1         | 1         |
| Pcdh10            | 0.919405  | 0.730265              | 0          | 1         | 1         |
| XLOC_020839       | 0.249035  | 0.173056              | 0          | 1         | 1         |
| Ccrn4l            | 7.03853   | 7.45289               | 0.0825255  | 0.481713  | 0.775249  |
| Naa15             | 2.23164   | 2.17035               | 0          | 1         | 1         |
| Naa15_j4          | 3.51841   | 3.25142               | 0          | 1         | 1         |
| Rab33b            | 2.04823   | 1.48928               | 0          | 1         | 1         |
| Mgst2_j1          | 0.266585  | 0.205052              | -0.378603  | 0.724721  | 0.902067  |
| Foxo1             | 3.25311   | 3.31563               | 0.0274624  | 0.826758  | 0.944222  |
| Lhfp              | 8.98216   | 8.36445               | 0          | 1         | 1         |
| Lhfp_j1           | 4.14242   | 3.46149               | 0          | 1         | 1         |
| 2810046L04Rik     | 4.71924   | 4.76635               | 0.0143281  | 0.909297  | 0.971287  |
| Trpc4_j4          | 0.152113  | 0.116525              | -0.384507  | 0.480033  | 0.77397   |
| Trpc4             | 0.108017  | 0 -1.79769e+308       |            | 3.32E-05  | 1         |
| Postn             | 0.118735  | 0.436482              | 1.87817    | 0.0024959 | 0.0298018 |
| Postn_j1          | 8.0293    | 7.09494               | -0.178482  | 0.144838  | 0.472377  |
| Alg5              | 11.4687   | 12.4295               | 0.116074   | 0.350942  | 0.688199  |
| Smad9             | 3.9268    | 2.22375               | -0.820361  | 3.01E-12  | 3.98E-10  |
| Spg20             | 8.80719   | 8.78027               | 0          | 1         | 1         |
| Spg20_j1          | 3.64421   | 3.26189               | 0          | 1         | 1         |
| Dclk1             | 6.40197   | 7.21295               | 0          | 1         | 1         |
| Dclk1_j1          | 4.54189   | 2.94964               | 0          | 1         | 1         |
| Dclk1             | 0.176786  | 0                     | 0          | 1         | 1         |
| Rnf13             | 42.6264   | 36.0842               | -0.240381  | 0.0175688 | 0.128641  |
| Tsc22d2           | 1.49879   | 1.63987               | 0          | 1         | 1         |

|                  |          |           |               |           |           |
|------------------|----------|-----------|---------------|-----------|-----------|
| Tsc22d2          | 2.05994  | 1.89308   | 0             | 1         | 1         |
| Eif2a_j1         | 15.2164  | 12.0849   | 0             | 1         | 1         |
| 2810407C02Rik    | 7.81749  | 7.0053    | 0             | 1         | 1         |
| 2810407C02Rik_j1 | 13.3985  | 12.7947   | 0             | 1         | 1         |
| 2810407C02Rik_j3 | 0.547802 | 0         | 0             | 1         | 1         |
| AK016388_j1      | 0.106616 | 0.0370126 | -1.52634      | 0.266933  | 1         |
| Med12l_j1        | 0.128059 | 0         | -1.79769e+308 | 3.57E-08  | 1         |
| Arhgef26         | 1.72096  | 1.73831   | 0.0144702     | 0.922505  | 0.975867  |
| Mme_j1           | 0.414378 | 0         | 0             | 1         | 1         |
| Mme              | 0.391838 | 0         | 0             | 1         | 1         |
| Mme              | 0.22747  | 0.380419  | 0             | 1         | 1         |
| Gmps             | 6.64895  | 5.9743    | -0.154357     | 0.129651  | 0.448547  |
| Kcnab1           | 0.365492 | 0.387943  | 0.0860058     | 0.75674   | 0.916138  |
| Kcnab1_j3        | 6.14576  | 3.92384   | -0.647328     | 0.0262556 | 0.170111  |
| Tiparp           | 0.710473 | 0.74451   | 0.0675111     | 0.805639  | 0.935739  |
| Lekr1            | 0.515207 | 0.297154  | -0.793944     | 0.0795688 | 0.342609  |
| Lekr1_j6         | 0.150107 | 0         | -1.79769e+308 | 0.0139351 | 0.109101  |
| Lekr1_j7         | 0.318517 | 0.337216  | 0.0823029     | 0.779126  | 0.925601  |
| Ptx3_j3          | 0.068075 | 0.0569524 | -0.25737      | 0.836418  | 1         |
| Rsrc1            | 11.4323  | 9.63152   | -0.24728      | 0.0233834 | 0.156776  |
| Mlf1             | 2.31339  | 2.45561   | 0.0860681     | 0.717315  | 0.89803   |
| Gfm1             | 7.94513  | 6.6021    | -0.267147     | 0.0049955 | 0.050703  |
| Mfsd1            | 17.2552  | 18.1572   | 0.0735101     | 0.455411  | 0.75921   |
| lqcj-schip1_j2   | 0.283021 | 0.354616  | 0.325347      | 0.701243  | 0.890261  |
| lqcj             | 0.319545 | 0.118453  | -1.4317       | 0.160513  | 0.495117  |
| Schip1           | 38.7253  | 50.0506   | 0.370111      | 8.13E-05  | 0.0017976 |
| Smc4_j1          | 0.626274 | 0.0544219 | 0             | 1         | 1         |
| Ppm1l_j1         | 10.0281  | 4.99374   | 0             | 1         | 1         |
| Ppm1l            | 3.56925  | 3.0968    | 0             | 1         | 1         |
| Nmd3             | 12.2607  | 12.559    | 0.0346856     | 0.772746  | 0.922935  |
| Serpini1         | 8.8863   | 7.25654   | -0.292301     | 0.0176881 | 0.129321  |
| XLOC_020896      | 0.223578 | 0.158     | -0.500852     | 0.460359  | 0.761959  |
| Fstl5            | 3.65417  | 1.73444   | 0             | 1         | 1         |
| 4930579G24Rik    | 0.726732 | 0.508991  | -0.513783     | 0.133724  | 0.455139  |
| Fam198b_j1       | 2.48378  | 2.17116   | 0             | 1         | 1         |
| Pdgfc            | 0.894051 | 0.942996  | 0.0768941     | 0.762159  | 0.918113  |
| Pdgfc_j1         | 0.95231  | 1.11654   | 0.229529      | 0.449617  | 0.755705  |
| Ctso             | 5.36162  | 4.80691   | -0.157561     | 0.280066  | 0.62888   |
| Mtap9            | 3.58173  | 3.17421   | 0             | 1         | 1         |
| Fgg_j1           | 0.554114 | 0.793506  | 0.518057      | 0.316921  | 0.660306  |
| Fgg_j2           | 0.709485 | 0.579341  | -0.292361     | 0.615883  | 0.848594  |
| Plrg1            | 17.8776  | 17.5741   | -0.0246988    | 0.822389  | 0.942695  |
| Tmem154          | 0.507233 | 0.802631  | 0.662088      | 0.0132324 | 0.105325  |
| Fbxw7_j1         | 5.81219  | 1.31373   | 0             | 1         | 1         |
| Fbxw7            | 12.3513  | 9.14559   | 0             | 1         | 1         |
| Pet112l          | 1.68128  | 1.89325   | 0.171307      | 0.222207  | 0.569397  |
| Sh3d19_j1        | 1.91343  | 1.77164   | 0             | 1         | 1         |

|                  |           |                 |            |           |           |
|------------------|-----------|-----------------|------------|-----------|-----------|
| AK080030         | 0.211723  | 0.2523          | 0.252962   | 0.566379  | 0.824486  |
| Lrba_j1          | 0.420176  | 0.415532        | -0.0160352 | 0.972317  | 0.991962  |
| Etv3             | 2.75538   | 1.83014         | 0          | 1         | 1         |
| Etv3             | 1.63925   | 1.34205         | 0          | 1         | 1         |
| XLOC_020921      | 0.0943025 | 0.121323        | 0.363482   | 0.768747  | 1         |
| Arhgef11_j5      | 21.6108   | 16.0811         | 0          | 1         | 1         |
| Arhgef11_j2      | 0.293262  | 0.0932847       | 0          | 1         | 1         |
| Insrr_j1         | 0.428592  | 0.333338        | -0.36262   | 0.267975  | 0.616595  |
| Insrr_j7         | 0.455106  | 0.54041         | 0.247852   | 0.638355  | 0.860038  |
| Hdgf_j3          | 0.845152  | 0.645491        | 0          | 1         | 1         |
| Isg20l2          | 1.7979    | 1.53038         | -0.232425  | 0.312929  | 0.657313  |
| Crabp2           | 1.14199   | 1.44168         | 0.336205   | 0.232695  | 0.579823  |
| Nes              | 1.78429   | 1.88769         | 0          | 1         | 1         |
| Gpatch4          | 1.49757   | 1.57241         | 0          | 1         | 1         |
| Iqgap3_j2        | 0.393811  | 0.455458        | 0.209813   | 0.53427   | 0.805503  |
| Mef2d_j7         | 0.452535  | 0.0716782       | 0          | 1         | 1         |
| Cct3             | 96.4766   | 100.98          | 0.0658181  | 0.443701  | 0.751594  |
| 0610031J06Rik    | 10.9709   | 11.1445         | 0          | 1         | 1         |
| Smg5             | 2.33431   | 2.24106         | 0          | 1         | 1         |
| Paqr6_j2         | 1.01842   | 1.78462         | 0          | 1         | 1         |
| Paqr6_j1         | 1.15908   | 0.674409        | 0          | 1         | 1         |
| Paqr6_j5         | 0.489396  | 0.371174        | 0          | 1         | 1         |
| Mex3a            | 0.103787  | 0.121376        | 0.225856   | 0.754434  | 1         |
| Ubqln4           | 12.7559   | 11.7773         | 0          | 1         | 1         |
| Ssr2             | 41.7287   | 42.6343         | 0.0309759  | 0.762961  | 0.918329  |
| Arhgef2_j2       | 0.996822  | 1.15972         | 0          | 1         | 1         |
| Arhgef2_j3       | 0.584758  | 0.714611        | 0          | 1         | 1         |
| Arhgef2_j4       | 0.171131  | 0.37301         | 0          | 1         | 1         |
| 2810403A07Rik_j5 | 0.15941   | 0.0788989       | 0          | 1         | 1         |
| 2810403A07Rik_j2 | 2.85662   | 2.86464         | 0          | 1         | 1         |
| 2810403A07Rik_j1 | 0.491726  | 1.76712         | 0          | 1         | 1         |
| Rit1             | 22.3364   | 26.5013         | 0          | 1         | 1         |
| Ash1l_j2         | 1.38134   | 1.19778         | 0          | 1         | 1         |
| Ash1l_j4         | 3.32155   | 3.39862         | 0          | 1         | 1         |
| Clk2_j5          | 70.1263   | 68.4174         | 0          | 1         | 1         |
| Fam189b_j2       | 115.507   | 127.839         | 0          | 1         | 1         |
| Thbs3_j1         | 0.826326  | 0.7584          | 0          | 1         | 1         |
| Dpm3_j2          | 6.156     | 5.74749         | -0.0990595 | 0.613762  | 0.847685  |
| Shc1_j2          | 0.101332  | 0.0488004       | -1.05413   | 0.308095  | 1         |
| Shc1_j9          | 0.138222  | 0 -1.79769e+308 | 0.0001729  | 0.0001729 | 0.0034027 |
| Pbxip1           | 2.1162    | 2.7697          | 0.388254   | 0.0156395 | 0.118265  |
| Pbxip1_j2        | 1.16047   | 0.393766        | -1.5593    | 1.99E-06  | 7.56E-05  |
| Pbxip1_j4        | 0.360292  | 0.604503        | 0.746581   | 0.0284922 | 0.179542  |
| Pmvk             | 44.2385   | 49.5715         | 0.16421    | 0.0990405 | 0.389423  |
| Pmvk             | 5.17976   | 4.22424         | -0.294192  | 0.404642  | 0.726779  |
| Kcnn3_j1         | 0.0947704 | 0.0256006       | -1.88826   | 0.0516065 | 1         |
| Adar             | 5.64319   | 4.69325         | -0.265925  | 0.0138937 | 0.108864  |

|               |           |                 |             |           |           |
|---------------|-----------|-----------------|-------------|-----------|-----------|
| Ube2q1        | 4.60237   | 4.39914         | -0.0651582  | 0.548001  | 0.813959  |
| Ube2q1_j1     | 16.9726   | 16.6487         | -0.0277924  | 0.85395   | 0.953758  |
| She           | 0.302007  | 0.387791        | 0.360697    | 0.228478  | 0.575589  |
| 4933434E20Rik | 0.195151  | 0.294378        | 0           | 1         | 1         |
| Nup210l_j2    | 0.354038  | 0.040044        | -3.14425    | 0.0181111 | 0.131624  |
| Nup210l_j3    | 1.6243    | 0.864212        | -0.910362   | 0.0090833 | 0.0797801 |
| Nup210l_j5    | 1.08217   | 1.27665         | 0.238438    | 0.46626   | 0.765976  |
| Nup210l_j9    | 0.120078  | 0.0825457       | -0.540708   | 0.531594  | 1         |
| Rab13         | 0.41296   | 0.263447        | -0.648488   | 0.171475  | 0.50851   |
| Rab13         | 1.92961   | 1.98213         | 0.0387401   | 0.854787  | 0.954015  |
| Jtb           | 16.7185   | 19.0516         | 0.188468    | 0.133502  | 0.454638  |
| Slc39a1       | 8.66051   | 8.88529         | 0           | 1         | 1         |
| Crtc2         | 5.07607   | 4.67114         | -0.119938   | 0.459224  | 0.761406  |
| Dennd4b_j2    | 0.22353   | 0.262122        | 0.229772    | 0.599702  | 0.841292  |
| Gatad2b_j1    | 6.26237   | 6.29047         | 0.00645817  | 0.950511  | 0.985701  |
| Ilf2          | 22.1693   | 22.0224         | -0.00959075 | 0.9204    | 0.975089  |
| S100a13_j1    | 0.300393  | 0.229554        | -0.388021   | 0.638248  | 0.85998   |
| S100a16       | 15.1979   | 11.5892         | 0           | 1         | 1         |
| S100a3_j3     | 0.189061  | 0.0664487       | -1.50854    | 0.181019  | 0.520897  |
| S100a3_j6     | 0.33548   | 0.534927        | 0.673113    | 0.331447  | 0.673024  |
| S100a4        | 5.92329   | 6.28188         | 0           | 1         | 1         |
| S100a4_j2     | 14.1197   | 15.1841         | 0           | 1         | 1         |
| S100a6_j1     | 0.257486  | 1.28128         | 2.31502     | 0.0035304 | 0.0391871 |
| S100a11       | 0.190361  | 0.522504        | 1.4567      | 0.0071305 | 0.0668458 |
| S100a10       | 116.98    | 182.651         | 0.642821    | 1.87E-13  | 3.00E-11  |
| S100a10_j1    | 413.339   | 643.703         | 0.639067    | 3.94E-13  | 6.01E-11  |
| Them4         | 17.7927   | 24.9843         | 0.489734    | 3.71E-06  | 0.0001303 |
| Them5         | 0.855839  | 0.842156        | -0.023251   | 0.937313  | 0.980746  |
| Rorc          | 0.326134  | 0.308785        | -0.0788625  | 0.859412  | 0.955525  |
| Lingo4        | 0.949666  | 0.193818        | 0           | 1         | 1         |
| Tdrkh         | 5.15853   | 5.10484         | 0           | 1         | 1         |
| XLOC_020993   | 0.1243    | 0.0806828       | 0           | 1         | 1         |
| Mrpl9         | 21.9049   | 24.478          | 0.160231    | 0.115452  | 0.422552  |
| Celf3_j1      | 2.18654   | 3.28614         | 0           | 1         | 1         |
| Celf3_j11     | 0.368934  | 0.371982        | 0           | 1         | 1         |
| Celf3_j10     | 0.758243  | 0.692962        | 0           | 1         | 1         |
| Celf3_j9      | 1.72816   | 2.48163         | 0           | 1         | 1         |
| Pogz_j3       | 1.4592    | 1.12274         | 0           | 1         | 1         |
| Pogz          | 0.526604  | 0               | 0           | 1         | 1         |
| Pogz          | 1.23783   | 1.00137         | 0           | 1         | 1         |
| Selenbp1      | 1.03829   | 1.26855         | 0           | 1         | 1         |
| Rfx5          | 0.0752973 | 0 -1.79769e+308 | 0.0008645   |           | 1         |
| Rfx5_j2       | 0.36228   | 0.305686        | -0.245053   | 0.487372  | 0.778303  |
| Rfx5_j1       | 0.615722  | 0.825318        | 0.422669    | 0.158696  | 0.493167  |
| 4930481B07Rik | 0.146687  | 0.146535        | -0.00149239 | 0.998817  | 0.99946   |
| Vps72         | 10.8333   | 13.1811         | 0           | 1         | 1         |
| Tmod4_j3      | 0.15003   | 0.0489203       | -1.61674    | 0.308133  | 0.653037  |

|             |           |                 |            |           |           |
|-------------|-----------|-----------------|------------|-----------|-----------|
| Sema6c_j6   | 0.47125   | 0.613465        | 0          | 1         | 1         |
| Sema6c_j3   | 1.47854   | 0.72707         | 0          | 1         | 1         |
| Cdc42se1    | 3.07124   | 3.29913         | 0          | 1         | 1         |
| Fam63a_j1   | 1.94577   | 3.02416         | 0          | 1         | 1         |
| Lass2       | 2.75381   | 2.8949          | 0          | 1         | 1         |
| Gm4349_j1   | 0.56189   | 0.625969        | 0.155804   | 0.682263  | 0.880712  |
| Arnt        | 0.745866  | 1.21916         | 0          | 1         | 1         |
| Arnt        | 1.5601    | 1.51655         | 0          | 1         | 1         |
| Arnt_j1     | 0         | 0.19206         | 0          | 1         | 1         |
| Ctsk        | 1.18351   | 1.31954         | 0.156962   | 0.5857    | 0.834044  |
| Ctss        | 2.06075   | 4.65263         | 1.17488    | 1.73E-07  | 8.66E-06  |
| Ctss        | 4.62542   | 13.416          | 1.5363     | 0         | 0         |
| Golph3l     | 7.36381   | 7.02025         | -0.0689296 | 0.566723  | 0.824698  |
| Ensa        | 56.7554   | 54.8073         | -0.0503905 | 0.560394  | 0.821103  |
| Mcl1        | 6.04706   | 6.28553         | 0.055801   | 0.650695  | 0.865956  |
| Aph1a_j4    | 2.79501   | 2.58111         | -0.114864  | 0.498131  | 0.783887  |
| Aph1a_j3    | 0.423376  | 0.160463        | -1.3997    | 0.011624  | 0.0957862 |
| Anp32e      | 17.4584   | 16.5452         | -0.0775057 | 0.429718  | 0.742964  |
| Anp32e_j1   | 0.558409  | 0 -1.79769e+308 |            | 2.44E-05  | 0.000649  |
| AK028005_j1 | 0.104956  | 0.0848129       | -0.307431  | 0.751464  | 1         |
| Otud7b_j3   | 0.364953  | 0.397771        | 0          | 1         | 1         |
| Otud7b      | 1.25954   | 1.50339         | 0          | 1         | 1         |
| Otud7b_j9   | 0.957839  | 0.842265        | 0          | 1         | 1         |
| Mtmr11      | 2.01086   | 2.28229         | 0.182669   | 0.35363   | 0.68999   |
| Mtmr11_j7   | 2.66989   | 3.07566         | 0.204113   | 0.348381  | 0.686685  |
| Sf3b4_j1    | 2.40888   | 1.90841         | 0          | 1         | 1         |
| Sf3b4_j7    | 0.0644143 | 0.140561        | 0          | 1         | 1         |
| Sv2a        | 11.354    | 8.37526         | 0          | 1         | 1         |
| Hist2h2be   | 1.42021   | 1.55176         | 0.127803   | 0.496319  | 0.783222  |
| Txnip       | 5.90251   | 7.28594         | 0          | 1         | 1         |
| Txnip       | 9.51224   | 10.8586         | 0          | 1         | 1         |
| Lix1l       | 6.82711   | 7.18409         | 0.073532   | 0.503714  | 0.78721   |
| Rbm8a       | 4.0816    | 3.64382         | 0          | 1         | 1         |
| Rbm8a_j4    | 0.560087  | 0.59232         | 0          | 1         | 1         |
| Rbm8a_j3    | 1.41106   | 1.14121         | 0          | 1         | 1         |
| Itga10_j1   | 9.90263   | 8.79361         | -0.171355  | 0.129613  | 0.448478  |
| Itga10_j2   | 0.0805616 | 0.0635063       | -0.343193  | 0.811032  | 1         |
| Itga10_j5   | 0.0586455 | 0.0808945       | 0.464021   | 0.710216  | 1         |
| Ankrd35     | 0.771041  | 0.507602        | -0.603109  | 0.0688795 | 0.314596  |
| Pias3       | 0.397555  | 0.560191        | 0.494766   | 0.33058   | 0.672467  |
| Rnf115      | 25.1213   | 22.5114         | 0          | 1         | 1         |
| Acp6        | 2.73575   | 3.04301         | 0.153558   | 0.400676  | 0.724115  |
| Fmo5        | 0.488002  | 0.298762        | -0.707889  | 0.0401046 | 0.224138  |
| Prkab2      | 4.82441   | 5.606           | 0          | 1         | 1         |
| Prkab2_j1   | 6.27581   | 4.90159         | 0          | 1         | 1         |
| Sec22b      | 28.7807   | 30.4785         | 0.0826882  | 0.368247  | 0.701598  |
| Notch2_j3   | 0.785192  | 1.25148         | 0          | 1         | 1         |

|               |           |                 |            |           |           |
|---------------|-----------|-----------------|------------|-----------|-----------|
| Zfp697        | 0.243372  | 0.397096        | 0          | 1         | 1         |
| Zfp697_j2     | 0.331869  | 0.35299         | 0          | 1         | 1         |
| Zfp697_j3     | 0.136137  | 0.15062         | 0          | 1         | 1         |
| Wars2         | 1.16052   | 1.00659         | -0.205296  | 0.211618  | 0.556439  |
| Gdap2         | 5.69294   | 5.65291         | -0.0101797 | 0.923164  | 0.976043  |
| Trim45        | 3.0911    | 3.01117         | -0.0377963 | 0.773717  | 0.923197  |
| Igsf3_j3      | 3.77493   | 2.31165         | 0          | 1         | 1         |
| Igsf3_j4      | 0.705828  | 1.33406         | 0          | 1         | 1         |
| Nhlh2         | 0.598824  | 0.522109        | -0.197782  | 0.544968  | 0.811878  |
| Ngf           | 0.161192  | 1.21471         | 2.91375    | 2.69E-05  | 0.0007054 |
| Ngf_j1        | 0.254187  | 0 -1.79769e+308 |            | 0.0012189 | 0.0167549 |
| Tspan2        | 10.8857   | 8.19743         | 0          | 1         | 1         |
| Sike1         | 2.84196   | 2.72088         | 0          | 1         | 1         |
| Sike1_j1      | 0.667865  | 0.870409        | 0          | 1         | 1         |
| Csde1         | 50.4391   | 47.524          | 0          | 1         | 1         |
| Nras          | 5.77579   | 6.34752         | 0.136176   | 0.199262  | 0.542218  |
| Dennd2c_j1    | 0.0616644 | 0.0164921       | -1.90266   | 0.327661  | 1         |
| Bcas2         | 26.1358   | 24.6991         | -0.0815652 | 0.451177  | 0.756435  |
| Trim33        | 1.43432   | 1.88932         | 0          | 1         | 1         |
| Trim33        | 3.21418   | 2.87622         | 0          | 1         | 1         |
| Syt6_j1       | 0.182179  | 0.000361982     | 0          | 1         | 1         |
| Syt6_j3       | 0.202549  | 0.559638        | 0          | 1         | 1         |
| Syt6_j6       | 2.15645   | 1.96313         | 0          | 1         | 1         |
| Syt6_j10      | 1.58395   | 0.879046        | 0          | 1         | 1         |
| Ap4b1         | 3.25808   | 3.61046         | 0          | 1         | 1         |
| Ap4b1         | 6.44829   | 6.38639         | 0          | 1         | 1         |
| Ptpn22_j1     | 0.104798  | 0.115666        | 0.142355   | 0.871094  | 1         |
| Ptpn22_j2     | 0.117682  | 0.0599514       | -0.973032  | 0.349839  | 1         |
| Ptpn22_j6     | 0.127329  | 0 -1.79769e+308 |            | 0.0019068 | 1         |
| Phtf1_j5      | 0.336063  | 0.330992        | 0          | 1         | 1         |
| Phtf1         | 0.134076  | 0.0303214       | 0          | 1         | 1         |
| Phtf1_j12     | 22.9521   | 21.5401         | 0          | 1         | 1         |
| Slc16a1       | 15.2868   | 13.6753         | 0          | 1         | 1         |
| Ppm1j         | 30.1806   | 23.8949         | 0          | 1         | 1         |
| Ppm1j_j3      | 0.0539032 | 0.454097        | 0          | 1         | 1         |
| Rhoc          | 13.8617   | 24.2917         | 0          | 1         | 1         |
| Rhoc_j3       | 0.070054  | 0.173482        | 0          | 1         | 1         |
| St7l          | 3.13955   | 3.27362         | 0.0603319  | 0.641491  | 0.86175   |
| St7l_j1       | 0.984538  | 1.03801         | 0.0762956  | 0.679812  | 0.879585  |
| XLOC_021076   | 0.0762203 | 0 -1.79769e+308 |            | 0.0025547 | 1         |
| XLOC_021076   | 0.359313  | 0.104822        | -1.7773    | 0.0829461 | 0.350926  |
| XLOC_021076   | 0.125091  | 0.0999231       | -0.32409   | 0.594246  | 1         |
| Kcnd3_j1      | 1.19306   | 0.946588        | -0.333857  | 0.109653  | 0.412055  |
| Kcnd3_j2      | 1.50789   | 1.6305          | 0.112786   | 0.538072  | 0.807846  |
| Kcnd3_j3      | 5.22056   | 2.96448         | -0.816425  | 5.63E-05  | 0.0013192 |
| 6530418L21Rik | 5.97745   | 5.84367         | -0.0326541 | 0.771124  | 0.922274  |
| 6530418L21Rik | 0.453812  | 0.6149          | 0.438256   | 0.170236  | 0.507195  |

|                  |           |           |               |           |           |
|------------------|-----------|-----------|---------------|-----------|-----------|
| Wdr77            | 8.06243   | 8.02448   | 0             | 1         | 1         |
| Chia_j2          | 0.831972  | 0.661792  | -0.330158     | 0.447028  | 0.753744  |
| Chia_j1          | 2.30519   | 1.83782   | -0.32689      | 0.171921  | 0.509035  |
| Dram2            | 13.5794   | 13.4878   | 0             | 1         | 1         |
| 4933421E11Rik    | 1.99867   | 2.568     | 0             | 1         | 1         |
| 4933421E11Rik_j1 | 0.791134  | 1.16766   | 0             | 1         | 1         |
| 4933421E11Rik    | 3.03021   | 2.77189   | 0             | 1         | 1         |
| 4933421E11Rik    | 0.992291  | 0.960472  | 0             | 1         | 1         |
| AI504432         | 0.241223  | 0.173397  | -0.47629      | 0.264956  | 0.613825  |
| Kcna2_j4         | 16.6977   | 10.5791   | 0             | 1         | 1         |
| Kcna2_j5         | 0.344943  | 0.140134  | 0             | 1         | 1         |
| Hbxip            | 32.164    | 31.4287   | -0.0333619    | 0.772426  | 0.922804  |
| Slc16a4          | 0.415461  | 0.30524   | -0.444769     | 0.380973  | 0.711636  |
| XLOC_021090      | 0.226119  | 0.163546  | -0.467383     | 0.350355  | 0.687781  |
| Gstm5_j1         | 67.8308   | 66.9363   | -0.0191499    | 0.853472  | 0.953605  |
| Amigo1           | 16.9573   | 16.9366   | 0             | 1         | 1         |
| Amigo1           | 11.2298   | 9.11303   | 0             | 1         | 1         |
| Psm5_j1          | 0.1803    | 0.180993  | 0.00553193    | 0.992016  | 0.997581  |
| Psm5_j6          | 0.419249  | 0.249773  | -0.74719      | 0.151911  | 0.48322   |
| Sort1_j2         | 2.39251   | 1.85636   | 0             | 1         | 1         |
| Psrc1_j7         | 0.124607  | 0.0454077 | -1.45638      | 0.38002   | 1         |
| Taf13_j2         | 0.240158  | 0.158387  | -0.600527     | 0.413742  | 0.732496  |
| Taf13_j3         | 1.3509    | 1.1087    | -0.285047     | 0.285774  | 0.63454   |
| Wdr47            | 4.77621   | 6.55489   | 0             | 1         | 1         |
| Clcc1            | 4.22606   | 3.93684   | -0.102277     | 0.4988    | 0.78413   |
| Slc25a24         | 2.91083   | 3.98737   | 0.454009      | 0.0022285 | 0.0271413 |
| Vav3             | 2.17265   | 1.43956   | 0             | 1         | 1         |
| Vav3_j2          | 0.191417  | 0         | 0             | 1         | 1         |
| Col11a1          | 1.93613   | 1.07211   | 0             | 1         | 1         |
| Col11a1_j2       | 0.642098  | 0.5493    | 0             | 1         | 1         |
| Olfm3            | 0.753027  | 0.430284  | -0.807413     | 0.0097777 | 0.0842836 |
| Dph5             | 7.83135   | 8.34144   | 0.0910351     | 0.535017  | 0.806052  |
| Extl2            | 9.90586   | 5.43962   | 0             | 1         | 1         |
| Dbt              | 2.9049    | 2.73448   | -0.0872237    | 0.603363  | 0.843376  |
| Dbt_j2           | 1.1749    | 0.501244  | -1.22895      | 0.0006824 | 0.0105092 |
| XLOC_021118      | 0.327521  | 0         | 0             | 1         | 1         |
| 4833424O15Rik    | 0.788419  | 0.824289  | 0.0641877     | 0.79561   | 0.931953  |
| 4833424O15Rik    | 0.464525  | 0.248518  | -0.902407     | 0.0326228 | 0.19642   |
| 4833424O15Rik_j1 | 0.0665022 | 0         | -1.79769e+308 | 0.0054933 | 1         |
| XLOC_021122      | 0.306321  | 0.319046  | 0             | 1         | 1         |
| XLOC_021122      | 0.119604  | 0.0737225 | 0             | 1         | 1         |
| Dpyd_j1          | 0.383632  | 0.0470723 | -3.02677      | 0.0007681 | 0.0115852 |
| Dpyd_j2          | 0.625391  | 0.21857   | -1.51666      | 0.0432243 | 0.235971  |
| Alg14_j2         | 2.11311   | 2.42301   | 0             | 1         | 1         |
| Alg14            | 4.83275   | 4.10918   | 0             | 1         | 1         |
| Cnn3             | 63.2943   | 75.8385   | 0             | 1         | 1         |
| F3               | 4.54876   | 6.10388   | 0.424254      | 0.0052634 | 0.0526764 |

|                   |            |                 |            |           |           |
|-------------------|------------|-----------------|------------|-----------|-----------|
| Arhgap29_j2       | 0.152849   | 0.0144004       | 0          | 1         | 1         |
| Arhgap29_j4       | 0.335654   | 0.158051        | 0          | 1         | 1         |
| Gclm              | 20.4843    | 16.4881         | -0.313096  | 0.0004678 | 0.0076978 |
| Dnttip2           | 6.79126    | 7.1816          | 0.0806267  | 0.532168  | 0.804093  |
| Bcar3_j1          | 5.00587    | 3.15823         | 0          | 1         | 1         |
| Bcar3_j2          | 5.69018    | 4.95031         | 0          | 1         | 1         |
| 1810037117Rik     | 14.4838    | 13.9883         | -0.0502242 | 0.726299  | 0.902924  |
| Sec24d            | 3.10381    | 4.0103          | 0          | 1         | 1         |
| Prss12            | 3.98644    | 6.96104         | 0.804204   | 2.29E-09  | 1.80E-07  |
| Tram111           | 1.98824    | 1.56213         | -0.347975  | 0.158154  | 0.492398  |
| Ndst4             | 7.18705    | 2.90798         | -1.30538   | 0         | 0         |
| Ndst4_j1          | 1.12867    | 0.44979         | -1.3273    | 5.79E-06  | 0.0001922 |
| Arsj              | 0.296641   | 0.344639        | 0.216369   | 0.455197  | 0.758984  |
| Camk2d_j2         | 21.6191    | 21.1653         | 0          | 1         | 1         |
| 4930422G04Rik     | 0.13939    | 0.167612        | 0.266005   | 0.625489  | 0.853933  |
| 4930422G04Rik_j5  | 0.0565905  | 0 -1.79769e+308 | 0.0032445  | 0.0032445 | 1         |
| 4930422G04Rik_j14 | 0.196041   | 0 -1.79769e+308 | 0.0012891  | 0.0012891 | 0.0175173 |
| Tifa_j1           | 0.855006   | 2.00163         | 1.22717    | 8.11E-08  | 4.47E-06  |
| Tifa              | 2.51499    | 4.53234         | 0.849706   | 6.53E-09  | 4.76E-07  |
| Elovl6            | 1.04698    | 0.95562         | 0          | 1         | 1         |
| Elovl6            | 1.52944    | 0.000128935     | 0          | 1         | 1         |
| Cfi               | 0.182488   | 0.174148        | -0.0674885 | 0.916649  | 0.97399   |
| Pla2g12a          | 6.68403    | 8.06426         | 0.270823   | 0.0332368 | 0.198919  |
| Casp6_j1          | 0.339777   | 0.345999        | 0.0261821  | 0.945861  | 0.983787  |
| Col25a1_j2        | 0.124066   | 0.0648449       | -0.936049  | 0.174965  | 1         |
| Col25a1_j5        | 1.01836    | 0.41435         | -1.29733   | 1.13E-05  | 0.0003444 |
| XLOC_021153       | 0.0760651  | 0.234227        | 1.6226     | 0.0354078 | 0.207359  |
| XLOC_021153       | 0.0828132  | 0.000434383     | -7.57475   | 0.778118  | 1         |
| Lef1              | 0.457315   | 0.423508        | -0.110797  | 0.746139  | 0.911606  |
| Papss1            | 10.7303    | 9.62177         | 0          | 1         | 1         |
| Papss1            | 4.17072    | 3.63303         | 0          | 1         | 1         |
| Tbck              | 2.02677    | 1.85427         | 0          | 1         | 1         |
| Tbck_j2           | 1.82679    | 1.99057         | 0          | 1         | 1         |
| Ints12_j1         | 3.09631    | 1.95886         | 0          | 1         | 1         |
| Ints12            | 0.669005   | 0.447955        | 0          | 1         | 1         |
| Ppa2              | 1.57408    | 1.25719         | 0          | 1         | 1         |
| Ppa2_j2           | 0.412046   | 1.22906         | 0          | 1         | 1         |
| Ppa2_j4           | 2.7925     | 1.4596          | 0          | 1         | 1         |
| BC065149_j1       | 0.384275   | 0.324017        | -0.246071  | 0.679305  | 0.879479  |
| Cxxc4             | 2.64724    | 2.21655         | -0.256171  | 0.115608  | 0.422966  |
| Cxxc4_j3          | 1.36003    | 0.970257        | -0.487196  | 0.0570573 | 0.279855  |
| Nhedc2            | 0.155462   | 0.26543         | 0.771769   | 0.211236  | 0.555994  |
| Nhedc2_j2         | 0.0829773  | 0 -1.79769e+308 | 0.0153266  | 0.0153266 | 1         |
| Nhedc2_j5         | 0.106657   | 0.052941        | -1.01052   | 0.414758  | 1         |
| Manba             | 0.986148   | 0.377709        | -1.38453   | 7.11E-05  | 0.0016051 |
| Manba_j4          | 0.00753225 | 0.158792        | 4.39792    | 0.0397236 | 0.222871  |
| Slc39a8           | 0.28621    | 0.619002        | 1.11287    | 0.0039884 | 0.0427801 |



|                  |           |                 |            |           |           |
|------------------|-----------|-----------------|------------|-----------|-----------|
| Slc39a8          | 1.15371   | 0.619569        | -0.896948  | 0.0021204 | 0.0261653 |
| Slc39a8          | 0.0430468 | 0.104508        | 1.27963    | 0.201196  | 1         |
| XLOC_021171      | 0.130029  | 0.0850418       | -0.612585  | 0.533283  | 1         |
| XLOC_021172      | 0.184041  | 0.106142        | 0          | 1         | 1         |
| Ppp3ca           | 66.0377   | 60.9655         | 0          | 1         | 1         |
| Ppp3ca_j4        | 91.9775   | 87.533          | 0          | 1         | 1         |
| Emcn             | 6.18539   | 5.83427         | -0.0843138 | 0.591932  | 0.837449  |
| Ddit4l           | 0.922529  | 0.956087        | 0.051547   | 0.821991  | 0.942583  |
| Dnajb14          | 11.7767   | 9.85953         | -0.25634   | 0.0048959 | 0.0499109 |
| Mapksp1_j6       | 10.8188   | 10.397          | -0.0573741 | 0.675239  | 0.877609  |
| Mapksp1_j12      | 0.435006  | 0.353195        | -0.300569  | 0.505313  | 0.788165  |
| Rg9mtd2          | 1.024     | 0.824684        | 0          | 1         | 1         |
| Rg9mtd2          | 2.57571   | 2.40972         | 0          | 1         | 1         |
| Adh1             | 0.583072  | 1.06209         | 0.865162   | 0.0133311 | 0.105889  |
| Adh1_j2          | 0.26216   | 0.49094         | 0.905101   | 0.175706  | 0.514267  |
| Adh5             | 33.5376   | 34.2566         | 0.030604   | 0.765754  | 0.920003  |
| Adh5_j1          | 11.5935   | 10.3778         | -0.159818  | 0.39074   | 0.71753   |
| Eif4e_j4         | 0.260882  | 0.0389519       | 0          | 1         | 1         |
| XLOC_021183      | 0.0635783 | 0.0405848       | 0          | 1         | 1         |
| Tspan5           | 17.2614   | 16.3668         | 0          | 1         | 1         |
| Tspan5_j1        | 0.116519  | 0               | 0          | 1         | 1         |
| Unc5c            | 0.825438  | 0.880464        | 0.0931044  | 0.604383  | 0.843983  |
| Gbp6             | 0.266561  | 0.426177        | 0          | 1         | 1         |
| Gbp3_j1          | 0.68484   | 0.800178        | 0          | 1         | 1         |
| Gbp3_j2          | 0.275031  | 0               | 0          | 1         | 1         |
| Gbp2_j1          | 0.90316   | 0.259017        | -1.80194   | 0.0005315 | 0.0085823 |
| Gbp2             | 3.08181   | 2.0641          | -0.578263  | 0.0041484 | 0.0440696 |
| Ccbl2            | 0.677073  | 0.515141        | -0.394343  | 0.198035  | 0.541135  |
| Gtf2b            | 28.7443   | 27.4293         | -0.0675571 | 0.515447  | 0.794245  |
| XLOC_021191      | 0.0946244 | 0.0298144       | -1.6662    | 0.446885  | 1         |
| XLOC_021191      | 0.0771497 | 0.117957        | 0.612526   | 0.665601  | 1         |
| Sept15           | 58.0746   | 59.2188         | 0          | 1         | 1         |
| Sep15_j3         | 52.245    | 41.7053         | 0          | 1         | 1         |
| Odf2l_j2         | 0.268804  | 0.263874        | -0.0267061 | 0.963096  | 0.989724  |
| Odf2l_j7         | 0.0808134 | 0 -1.79769e+308 | 0.0180412  | 0.0180412 | 1         |
| Odf2l_j8         | 0.0881091 | 0.0421501       | -1.06376   | 0.456313  | 1         |
| Col24a1_j1       | 0.742658  | 0.468663        | 0          | 1         | 1         |
| Col24a1_j6       | 0.898714  | 0.777493        | 0          | 1         | 1         |
| Znhit6           | 2.2021    | 2.08267         | -0.0804495 | 0.560075  | 0.821011  |
| FJ422280         | 0.195269  | 0.102577        | -0.928754  | 0.250468  | 0.59819   |
| Ddah1            | 8.1782    | 8.96797         | 0          | 1         | 1         |
| Bcl10            | 5.72271   | 7.48762         | 0.38781    | 0.0076687 | 0.0705338 |
| Bcl10_j2         | 0.995023  | 0.659627        | -0.59308   | 0.184853  | 0.525128  |
| 2410004B18Rik_j2 | 1.65735   | 1.29572         | -0.35513   | 0.398767  | 0.722631  |
| 2410004B18Rik_j1 | 1.95884   | 1.81283         | -0.11176   | 0.774135  | 0.923447  |
| 2410004B18Rik    | 6.91468   | 6.28217         | -0.138401  | 0.534182  | 0.805439  |
| Syde2            | 0.340781  | 0.306432        | -0.15328   | 0.596697  | 0.839661  |

|                   |             |                 |            |           |           |
|-------------------|-------------|-----------------|------------|-----------|-----------|
| Mcoln2_j4         | 0.0645893   | 0.0145184       | -2.15341   | 0.521652  | 1         |
| Mcoln2_j7         | 0.166479    | 0.168988        | 0.0215774  | 0.978617  | 0.993756  |
| Lpar3_j1          | 0.246843    | 0 -1.79769e+308 |            | 0.0158652 | 0.119563  |
| Lpar3             | 10.8979     | 7.9602          | -0.453172  | 0.0004303 | 0.0071813 |
| Lpar3_j2          | 0.438161    | 0 -1.79769e+308 |            | 0.001874  | 0.0237193 |
| Ssx2ip            | 4.03494     | 3.21563         | 0          | 1         | 1         |
| Ssx2ip_j1         | 11.6854     | 8.03569         | 0          | 1         | 1         |
| Ctbs              | 0.677222    | 0.557409        | -0.280892  | 0.358753  | 0.694048  |
| Ctbs_j1           | 1.01977     | 0.758896        | -0.426274  | 0.186019  | 0.526394  |
| Gng5_j1           | 0.173561    | 0.149567        | -0.214654  | 0.746717  | 0.911779  |
| Ttll7_j1          | 49.9506     | 29.521          | 0          | 1         | 1         |
| Ttll7_j2          | 9.57133     | 14.235          | 0          | 1         | 1         |
| Ttll7_j4          | 99.138      | 77.4068         | 0          | 1         | 1         |
| AK133793_j2       | 0.351961    | 0.255904        | -0.459815  | 0.394411  | 0.719811  |
| AK133793_j1       | 0.202933    | 0.0111987       | -4.1796    | 0.131692  | 0.451686  |
| AK133793          | 0.115944    | 0.112649        | -0.0415894 | 0.966788  | 1         |
| Fubp1             | 2.58908     | 1.24722         | 0          | 1         | 1         |
| Fubp1_j3          | 1.05586     | 0.877677        | 0          | 1         | 1         |
| Fubp1_j5          | 0.000248538 | 0.379252        | 0          | 1         | 1         |
| Fubp1_j4          | 0.545764    | 1.00941         | 0          | 1         | 1         |
| Usp33             | 26.473      | 21.1908         | 0          | 1         | 1         |
| Pigk              | 19.9486     | 19.703          | -0.0178718 | 0.844158  | 0.950736  |
| XLOC_021219       | 0.170903    | 0.0958466       | -0.834377  | 0.220605  | 0.567463  |
| XLOC_021220       | 0.136006    | 0.0286898       | -2.24506   | 0.261637  | 1         |
| 4922501L14Rik_j4  | 0.473747    | 0.112782        | 0          | 1         | 1         |
| 4922501L14Rik_j11 | 0.185687    | 0.108161        | 0          | 1         | 1         |
| Lrriq3            | 0.185341    | 0.231238        | 0.319199   | 0.746884  | 0.911809  |
| Lrriq3            | 0.00816211  | 0.0755517       | 3.21045    | 0.16803   | 1         |
| Negr1             | 4.88188     | 4.35107         | -0.166068  | 0.162183  | 0.497506  |
| Zranb2            | 30.5946     | 27.215          | -0.168871  | 0.0698894 | 0.317312  |
| Ptger3            | 10.0385     | 8.4931          | -0.241181  | 0.0131198 | 0.104703  |
| Ankrd13c          | 6.99278     | 7.4095          | 0.08351    | 0.41423   | 0.732813  |
| Ankrd13c_j1       | 3.17398     | 4.08664         | 0.364626   | 0.245534  | 0.592921  |
| Wls               | 14.2747     | 11.6275         | -0.295912  | 0.0038907 | 0.042075  |
| Pxmp3_j5          | 0.263437    | 0.0918719       | 0          | 1         | 1         |
| Pxmp3             | 0.193584    | 0.199679        | 0          | 1         | 1         |
| Pxmp3             | 0.213623    | 0.217188        | 0          | 1         | 1         |
| Pxmp3_j2          | 1.21956     | 0.831906        | 0          | 1         | 1         |
| Il7_j5            | 0.302932    | 0.0698267       | -2.11715   | 0.0519745 | 0.264536  |
| Il7               | 1.32038     | 1.41443         | 0.0992655  | 0.679728  | 0.879568  |
| Hey1_j1           | 4.99063     | 3.66877         | 0          | 1         | 1         |
| Hey1_j2           | 2.28632     | 2.55133         | 0          | 1         | 1         |
| Hey1              | 8.23868     | 7.62242         | 0          | 1         | 1         |
| Tpd52_j2          | 1.54541     | 0.705608        | 0          | 1         | 1         |
| Tpd52_j3          | 1.39643     | 0.859596        | 0          | 1         | 1         |
| Tpd52             | 8.40738     | 7.66612         | 0          | 1         | 1         |
| Zfp704            | 0.741678    | 0.677058        | -0.131513  | 0.446797  | 0.753538  |

|                 |           |             |               |           |           |
|-----------------|-----------|-------------|---------------|-----------|-----------|
| Pag1            | 0.228201  | 0.0663581   | 0             | 1         | 1         |
| Pag1            | 0.924816  | 1.36748     | 0             | 1         | 1         |
| Pmp2            | 1.80521   | 1.43575     | -0.330361     | 0.160964  | 0.495702  |
| Impa1           | 1.60466   | 1.40483     | -0.191866     | 0.166514  | 0.502925  |
| Zfand1_j4       | 0.329608  | 0.191896    | -0.780421     | 0.368365  | 0.701715  |
| Zfand1_j9       | 0.188974  | 0.18992     | 0.00721027    | 0.99529   | 0.998726  |
| Zfand1_j6       | 0.409758  | 0.423907    | 0.0489738     | 0.932176  | 0.979434  |
| Snx16           | 6.64345   | 6.47696     | 0             | 1         | 1         |
| AK140446        | 1.82045   | 1.42531     | -0.353015     | 0.122594  | 0.4357    |
| Car1_j1         | 0.363516  | 0.803548    | 1.14436       | 0.022553  | 0.15319   |
| LOC100038947_j2 | 0.0717155 | 0           | -1.79769e+308 | 0.0432171 | 1         |
| Cyp7b1          | 1.01282   | 0.718372    | -0.495575     | 0.145646  | 0.473555  |
| Armc1           | 21.5859   | 17.8149     | -0.277006     | 0.0058744 | 0.0575644 |
| Pde7a_j2        | 0.568441  | 0.609763    | 0.101237      | 0.726501  | 0.903104  |
| Pde7a           | 2.88116   | 4.20873     | 0.546738      | 2.26E-05  | 0.0006115 |
| Crh             | 2.5045    | 5.75114     | 1.19932       | 8.29E-11  | 8.61E-09  |
| XLOC_021266     | 0.059674  | 0.0418086   | -0.513303     | 0.6877    | 1         |
| Hps3_j1         | 6.53091   | 6.76614     | 0             | 1         | 1         |
| Hps3            | 7.23343   | 5.51067     | 0             | 1         | 1         |
| Gyg_j1          | 32.2818   | 25.3586     | 0             | 1         | 1         |
| Gyg             | 48.9655   | 33.3561     | 0             | 1         | 1         |
| Cpb1_j5         | 0.0665151 | 0           | -1.79769e+308 | 0.0376661 | 1         |
| Cpb1_j2         | 0.756081  | 1.14843     | 0.60305       | 0.0731356 | 0.325612  |
| Agtr1b          | 2.19276   | 1.77716     | -0.303176     | 0.190112  | 0.531948  |
| Nlgn1_j6        | 0.130581  | 0.170284    | 0.382998      | 0.597951  | 0.840519  |
| Fndc3b_j2       | 0.345388  | 0.443076    | 0             | 1         | 1         |
| AK007174_j8     | 0.602568  | 0.60233     | -0.000571396  | 0.999307  | 0.999645  |
| AK046440        | 0.221694  | 0.128612    | -0.78554      | 0.308982  | 0.653841  |
| Mecom_j3        | 0.0479685 | 0           | -1.79769e+308 | 0.0089373 | 1         |
| Mecom_j4        | 0         | 0.0711969   | 1.79769e+308  | 0.017329  | 1         |
| Lrrc31_j4       | 0.337326  | 0.0852153   | -1.98496      | 0.0020958 | 0.0259469 |
| Lrrc31_j3       | 0.959139  | 0.449446    | -1.09359      | 0.0001524 | 0.0030554 |
| Phc3_j2         | 0.267602  | 0.149373    | 0             | 1         | 1         |
| Phc3_j3         | 0.23158   | 0.000226949 | 0             | 1         | 1         |
| Slc7a14         | 6.78774   | 5.87427     | 0             | 1         | 1         |
| Zmat3_j5        | 0.308924  | 0.149303    | 0             | 1         | 1         |
| Zmat3           | 1.18307   | 1.16374     | 0             | 1         | 1         |
| Gnb4            | 2.80899   | 2.7249      | 0             | 1         | 1         |
| Pex5l_j4        | 3.11262   | 2.58543     | -0.267724     | 0.0695245 | 0.316209  |
| Ccdc39_j4       | 0.491527  | 0.401756    | -0.29095      | 0.236564  | 0.583799  |
| Dcun1d1_j3      | 0.151596  | 0           | -1.79769e+308 | 0.189504  | 0.531344  |
| Dcun1d1_j4      | 0.343419  | 0.398875    | 0.215965      | 0.762875  | 0.918329  |
| Mccc1_j2        | 0.709077  | 0.770364    | 0.119599      | 0.678514  | 0.879095  |
| Mccc1           | 0.208182  | 0.000245807 | -9.7261       | 0.468024  | 0.766788  |
| Qrfpr           | 0.440823  | 0.926125    | 1.07101       | 0.002729  | 0.0320207 |
| Anxa5           | 211.765   | 213.504     | 0             | 1         | 1         |
| AK043581_j1     | 1.06171   | 1.01832     | 0             | 1         | 1         |

|               |            |           |               |           |           |
|---------------|------------|-----------|---------------|-----------|-----------|
| AK043581      | 0.351299   | 0.465916  | 0             | 1         | 1         |
| Ccna2         | 1.33022    | 1.43555   | 0.109932      | 0.522319  | 0.798827  |
| Bbs7          | 5.75808    | 5.63819   | -0.0303566    | 0.821204  | 0.942206  |
| Trpc3         | 5.27377    | 3.14016   | 0             | 1         | 1         |
| Trpc3_j2      | 7.26529    | 4.17368   | 0             | 1         | 1         |
| Trpc3_j1      | 0.129404   | 0         | 0             | 1         | 1         |
| Cetn4_j1      | 0.209266   | 0.107138  | -0.965867     | 0.241186  | 0.588314  |
| Ankrd50_j2    | 3.86251    | 1.95549   | 0             | 1         | 1         |
| Ankrd50_j1    | 5.82648    | 6.50824   | 0             | 1         | 1         |
| Mfsd8         | 0.655646   | 0.623739  | 0             | 1         | 1         |
| Mfsd8_j4      | 0.916549   | 0.677249  | 0             | 1         | 1         |
| Mfsd8_j3      | 0.968311   | 0.421009  | 0             | 1         | 1         |
| Pgrmc2        | 16.3487    | 17.1841   | 0             | 1         | 1         |
| Sclt1         | 0.970528   | 1.10281   | 0.184337      | 0.465924  | 0.765799  |
| AK012035_j1   | 0.00346317 | 0.127537  | 5.20268       | 0.123062  | 1         |
| Pcdh18        | 1.50551    | 1.43874   | -0.0654514    | 0.715655  | 0.897263  |
| Pcdh18        | 0.375065   | 0.215966  | -0.796334     | 0.0597104 | 0.287541  |
| Elf2          | 2.13041    | 1.90133   | 0             | 1         | 1         |
| Elf2          | 1.64051    | 1.26519   | 0             | 1         | 1         |
| Elf2_j3       | 0.561517   | 0.64011   | 0             | 1         | 1         |
| 4930583H14Rik | 0.129413   | 0.151607  | 0.228354      | 0.802339  | 1         |
| Ndufc1_j1     | 1.46643    | 1.49684   | 0             | 1         | 1         |
| Setd7         | 3.40831    | 3.33597   | -0.0309522    | 0.790536  | 0.930178  |
| Maml3         | 0.232974   | 0.298744  | 0             | 1         | 1         |
| Cog6          | 14.725     | 12.7824   | -0.204111     | 0.048502  | 0.253535  |
| Nhlrc3        | 0.534916   | 0.530946  | -0.0107467    | 0.969653  | 0.99148   |
| Frem2_j9      | 0.168916   | 0.140074  | -0.270118     | 0.56488   | 0.82359   |
| Ufm1          | 14.1372    | 13.6456   | -0.0510609    | 0.587372  | 0.835002  |
| Rfxap         | 6.60972    | 5.03433   | -0.392789     | 0.0001832 | 0.0035674 |
| 6030405A18Rik | 2.29839    | 3.94306   | 0.778691      | 1.52E-06  | 5.95E-05  |
| Nbea_j4       | 3.92317    | 2.96751   | 0             | 1         | 1         |
| Tm4sf1_j1     | 1.55863    | 2.31382   | 0.569998      | 0.0024931 | 0.0297761 |
| Wwtr1         | 2.39892    | 2.56864   | 0.0986184     | 0.519174  | 0.796856  |
| Commd2        | 0.758943   | 0.803878  | 0.0829853     | 0.605976  | 0.84481   |
| Pfn2_j2       | 2.01657    | 1.66324   | 0             | 1         | 1         |
| Pfn2          | 33.3386    | 26.9195   | 0             | 1         | 1         |
| Pfn2          | 61.6252    | 51.3783   | 0             | 1         | 1         |
| XLOC_021349   | 0.294942   | 0.144041  | -1.03395      | 0.0810065 | 0.346508  |
| XLOC_021350   | 0.0532832  | 0         | -1.79769e+308 | 0.0666428 | 1         |
| AK005707_j3   | 0.0863271  | 0.0138655 | -2.63831      | 0.1543    | 1         |
| AK005707_j1   | 0.150585   | 0.0310213 | -2.27925      | 0.112107  | 0.416662  |
| Serp1         | 12.7857    | 14.3078   | 0             | 1         | 1         |
| Fam194a_j1    | 1.88623    | 1.63083   | -0.209905     | 0.516786  | 0.795273  |
| Siah2         | 6.53372    | 6.99447   | 0.0983087     | 0.441116  | 0.749926  |
| AK030561      | 2.12947    | 1.94844   | 0             | 1         | 1         |
| AK030561_j2   | 3.50046    | 3.98205   | 0             | 1         | 1         |
| AK030561_j3   | 0.455234   | 0.565634  | 0             | 1         | 1         |

|                  |           |                 |            |           |           |
|------------------|-----------|-----------------|------------|-----------|-----------|
| Clrn1            | 1.77869   | 1.17501         | 0          | 1         | 1         |
| P2ry14           | 0.10418   | 0.0756829       | -0.461034  | 0.688586  | 1         |
| P2ry14_j1        | 0.110882  | 0.132726        | 0.259427   | 0.787568  | 1         |
| P2ry14           | 0.664355  | 1.05096         | 0.66168    | 0.0508722 | 0.261327  |
| P2ry12_j2        | 0.431972  | 0.331765        | 0          | 1         | 1         |
| P2ry12_j1        | 0.789313  | 0.724157        | 0          | 1         | 1         |
| P2ry12           | 0.529772  | 0.596443        | 0          | 1         | 1         |
| Dhx36            | 10.1713   | 8.98336         | 0          | 1         | 1         |
| Gpr149_j1        | 2.50156   | 3.971           | 0          | 1         | 1         |
| Gpr149_j4        | 0.722784  | 0.672683        | 0          | 1         | 1         |
| Gpr149           | 3.91647   | 3.41461         | 0          | 1         | 1         |
| Plch1_j3         | 0.0891581 | 0.0516439       | -0.787768  | 0.408617  | 1         |
| E130311K13Rik    | 3.63906   | 3.98623         | 0.13146    | 0.442075  | 0.750452  |
| Slc33a1          | 6.78262   | 5.81292         | -0.22258   | 0.0764781 | 0.334147  |
| Ssr3_j2          | 4.86389   | 5.6845          | 0          | 1         | 1         |
| Ssr3             | 38.2715   | 36.8121         | 0          | 1         | 1         |
| Ccnl1_j6         | 0.768875  | 0 -1.79769e+308 |            | 3.82E-14  | 6.77E-12  |
| Ccnl1            | 0.45944   | 0.418395        | -0.135011  | 0.644989  | 0.863026  |
| Shox2            | 1.18894   | 0.806317        | 0          | 1         | 1         |
| Shox2            | 4.56107   | 3.00442         | 0          | 1         | 1         |
| Lxn              | 37.7339   | 38.5597         | 0.0312291  | 0.736316  | 0.907153  |
| Rarres1          | 5.52896   | 4.4048          | -0.327931  | 0.0026562 | 0.031309  |
| XLOC_021379      | 0.118831  | 0.0283045       | -2.06982   | 0.152798  | 1         |
| Gm5848           | 17.7511   | 18.5934         | 0.0668836  | 0.71208   | 0.895583  |
| Ift80_j2         | 6.11136   | 4.90349         | 0          | 1         | 1         |
| Ift80_j3         | 0.14813   | 0.0803429       | 0          | 1         | 1         |
| Kpna4            | 11.3673   | 8.25501         | 0          | 1         | 1         |
| B3galnt1_j1      | 3.00339   | 3.32499         | 0.14676    | 0.565367  | 0.823805  |
| B3galnt1         | 12.2416   | 12.3581         | 0.0136689  | 0.903149  | 0.969087  |
| 1110032A04Rik    | 0.248719  | 0.0430387       | -2.53081   | 0.0169207 | 0.125327  |
| 1110032A04Rik_j3 | 0.643638  | 0.278023        | -1.21105   | 0.0095802 | 0.0829776 |
| 1110032A04Rik    | 0.233964  | 0.147393        | -0.666613  | 0.257839  | 0.606586  |
| Slitrk3_j1       | 2.12066   | 1.16697         | -0.861738  | 0.0009092 | 0.0132606 |
| Slitrk3_j3       | 3.16042   | 1.95457         | -0.693263  | 4.22E-06  | 0.0001459 |
| Bche_j2          | 0.123576  | 0.0383998       | -1.68623   | 0.109249  | 1         |
| Bche             | 1.91749   | 1.51237         | -0.342413  | 0.0420356 | 0.231635  |
| Pdcd10_j1        | 0.252087  | 0.160359        | -0.652618  | 0.0926497 | 0.374542  |
| Golim4_j2        | 11.927    | 9.32614         | -0.354879  | 0.0011609 | 0.0161023 |
| Golim4           | 2.9289    | 2.144           | -0.450059  | 0.0005756 | 0.0091657 |
| Rapgef2_j2       | 1.29935   | 0.936576        | 0          | 1         | 1         |
| Rapgef2_j1       | 1.56204   | 1.63616         | 0          | 1         | 1         |
| Rapgef2          | 1.33129   | 0.888138        | 0          | 1         | 1         |
| Rapgef2_j3       | 0.0551401 | 0.0341131       | -0.692777  | 0.763784  | 1         |
| Fnip2            | 0.371282  | 0.201088        | 0          | 1         | 1         |
| Fnip2_j2         | 0.385333  | 0.276155        | 0          | 1         | 1         |
| Etfdh            | 3.38458   | 3.17118         | -0.0939578 | 0.391401  | 0.717908  |
| Rxfp1_j1         | 6.06563   | 5.62382         | -0.109105  | 0.57432   | 0.828005  |

|                  |           |             |            |           |           |
|------------------|-----------|-------------|------------|-----------|-----------|
| Rxfp1_j5         | 0.0814826 | 0.0202579   | -2.00801   | 0.280175  | 1         |
| Tmem144_j3       | 0.54447   | 0.849899    | 0.64244    | 0.0454153 | 0.243949  |
| Gria2_j6         | 0.264212  | 0.0704539   | -1.90695   | 0.0027067 | 0.0318128 |
| Gria2_j4         | 0.169246  | 0.159449    | -0.0860266 | 0.855316  | 0.954239  |
| Gria2_j11        | 0.94655   | 0.388032    | -1.2865    | 1.74E-05  | 0.0004959 |
| Glrj_j4          | 0.490442  | 0           | 0          | 1         | 1         |
| Glrj_j5          | 13.6656   | 10.031      | 0          | 1         | 1         |
| Glrj_j1          | 4.98776   | 3.58951     | 0          | 1         | 1         |
| Gucy1b3          | 0.881491  | 0.894314    | 0.0208352  | 0.929261  | 0.978343  |
| Gucy1a3          | 0.569125  | 0.76579     | 0.428202   | 0.0680298 | 0.312296  |
| Npy2r_j1         | 2.93635   | 3.95483     | 0          | 1         | 1         |
| Npy2r            | 1.254     | 2.28779     | 0          | 1         | 1         |
| Rbm46_j2         | 0.11518   | 0.154687    | 0.425468   | 0.48454   | 1         |
| Rbm46_j1         | 0.27263   | 0.146624    | -0.894825  | 0.092905  | 0.374921  |
| Lrat             | 0.309148  | 0.793255    | 1.35949    | 3.95E-10  | 3.53E-08  |
| Tlr2_j2          | 0.0405554 | 0.0909356   | 1.16495    | 0.278608  | 1         |
| D930015E06Rik_j4 | 1.48254   | 1.20107     | -0.303753  | 0.217243  | 0.563457  |
| D930015E06Rik    | 9.01717   | 7.67113     | -0.233236  | 0.0236372 | 0.157956  |
| Mnd1_j4          | 0.114791  | 0.103831    | -0.144778  | 0.952277  | 1         |
| Trim2_j3         | 13.1115   | 13.225      | 0          | 1         | 1         |
| Trim2_j4         | 0.256165  | 0           | 0          | 1         | 1         |
| Trim2            | 10.6723   | 8.69144     | 0          | 1         | 1         |
| Trim2            | 6.33914   | 4.53316     | 0          | 1         | 1         |
| Trim2            | 2.68856   | 2.43548     | 0          | 1         | 1         |
| Fhdc1_j3         | 0.243911  | 0.000190982 | 0          | 1         | 1         |
| Fhdc1_j4         | 0.646925  | 0.387202    | 0          | 1         | 1         |
| Arfp1            | 0.432019  | 0.366272    | 0          | 1         | 1         |
| Fam160a1         | 2.60E-05  | 0.126621    | 12.252     | 0.963993  | 1         |
| Fam160a1_j2      | 0.167152  | 0.101347    | -0.721851  | 0.344042  | 0.683976  |
| Rps3a_j1         | 0.556382  | 0.505945    | -0.137094  | 0.713124  | 0.896209  |
| Dclk2_j3         | 5.64387   | 5.69946     | 0          | 1         | 1         |
| Dclk2            | 6.49468   | 4.34817     | 0          | 1         | 1         |
| Cd1d1            | 2.12041   | 3.03669     | 0.518157   | 0.0078134 | 0.0713527 |
| Kirrel_j1        | 0.509086  | 0.384149    | 0          | 1         | 1         |
| Kirrel_j2        | 0.904211  | 0.436508    | 0          | 1         | 1         |
| Kirrel           | 0.966411  | 0.785656    | 0          | 1         | 1         |
| Fcrls            | 1.60926   | 4.11598     | 1.35484    | 1.91E-12  | 2.60E-10  |
| 4933430H15Rik_j1 | 0.131897  | 0.0914751   | -0.527965  | 0.383016  | 1         |
| Pear1            | 0.182949  | 0.0555498   | 0          | 1         | 1         |
| Ntrk1_j3         | 39.7711   | 41.4318     | 0          | 1         | 1         |
| Ntrk1            | 75.9022   | 65.987      | 0          | 1         | 1         |
| Prcc_j4          | 2.15448   | 1.82883     | -0.236419  | 0.467137  | 0.766568  |
| Prcc             | 16.1386   | 15.4492     | -0.0629833 | 0.568767  | 0.825676  |
| BC023814_j1      | 0.368088  | 0.31917     | 0          | 1         | 1         |
| Bcan_j6          | 0.273796  | 0.0335876   | 0          | 1         | 1         |
| Bcan             | 2.67095   | 1.71279     | 0          | 1         | 1         |
| Apoa1bp          | 2.2962    | 2.05156     | 0          | 1         | 1         |

|            |           |                       |            |           |          |
|------------|-----------|-----------------------|------------|-----------|----------|
| Tmem79_j1  | 50.8042   | 50.109                | 0          | 1         | 1        |
| Tmem79     | 5.51998   | 4.65724               | 0          | 1         | 1        |
| Pmf1       | 3.05315   | 3.65597               | 0.259958   | 0.208973  | 0.553157 |
| Pmf1       | 0.660044  | 0.460391              | -0.519702  | 0.428992  | 0.742566 |
| Slc25a44   | 4.56353   | 4.74395               | 0          | 1         | 1        |
| Sema4a     | 0.440782  | 0.524802              | 0          | 1         | 1        |
| Sema4a     | 1.44482   | 1.6707                | 0          | 1         | 1        |
| Sema4a     | 0.580561  | 0.961801              | 0          | 1         | 1        |
| Lmna_j3    | 0.0492844 | 0 -1.79769e+308       | 0.0448222  |           | 1        |
| Lmna       | 0.382032  | 0.307335              | -0.313879  | 0.560207  | 0.821025 |
| Robld3     | 18.0628   | 18.9254               | 0.0672971  | 0.569948  | 0.826089 |
| Gm10704    | 58.1708   | 57.2725               | -0.022453  | 0.817814  | 0.940908 |
| Syt11_j5   | 95.2522   | 107.261               | 0          | 1         | 1        |
| Syt11_j7   | 2.64565   | 0                     | 0          | 1         | 1        |
| Syt11_j6   | 0.204814  | 0                     | 0          | 1         | 1        |
| Dap3_j5    | 1.59253   | 1.43705               | -0.148213  | 0.629043  | 0.85574  |
| Dap3_j4    | 1.2164    | 0.960219              | -0.341178  | 0.351594  | 0.688851 |
| Rusc1_j1   | 44.2091   | 46.2895               | 0          | 1         | 1        |
| Rusc1      | 31.3674   | 37.2389               | 0          | 1         | 1        |
| Rusc1      | 12.4583   | 5.57203               | 0          | 1         | 1        |
| Fdps_j3    | 0.195762  | 0.293681              | 0.585149   | 0.207408  | 0.551923 |
| Fdps_j12   | 0         | 0.844604 1.79769e+308 | 1.71E-05   | 0.0004877 |          |
| Fdps_j11   | 0.0104335 | 0.439866              | 5.39777    | 0.0488006 | 0.254523 |
| Fdps_j15   | 9.56844   | 9.21511               | -0.0542822 | 1         | 1        |
| Hcn3       | 6.0611    | 6.51338               | 0          | 1         | 1        |
| Mtx1       | 1.72685   | 1.66116               | 0          | 1         | 1        |
| Trim46_j1  | 6.32197   | 3.82268               | 0          | 1         | 1        |
| Slc50a1_j1 | 4.96247   | 3.0432                | -0.705468  | 0.0240822 | 0.160082 |
| Slc50a1    | 15.7875   | 16.0121               | 0.0203848  | 0.891958  | 0.965687 |
| Efna1      | 18.2125   | 21.9185               | 0.267224   | 0.0141386 | 0.110251 |
| Efna3_j1   | 0.488739  | 0.355588              | -0.458858  | 0.321733  | 0.664845 |
| Efna3      | 1.13758   | 0.735863              | -0.628461  | 0.0319043 | 0.193578 |
| Efna4      | 0.317385  | 0.485631              | 0.613627   | 0.16686   | 0.503246 |
| Adam15_j3  | 0.423202  | 0.325985              | 0          | 1         | 1        |
| Zbtb7b     | 4.66378   | 4.70997               | 0.0142183  | 0.916087  | 0.973886 |
| Flad1_j1   | 8.15978   | 7.13471               | -0.193677  | 0.140993  | 0.466982 |
| Flad1      | 2.62833   | 2.86348               | 0.123622   | 0.461522  | 0.762822 |
| Cks1b      | 0.770752  | 0.716596              | -0.105106  | 0.480677  | 0.774441 |
| Chrn2      | 1.13413   | 0.93648               | -0.276264  | 0.170045  | 0.507178 |
| Atp8b2_j6  | 0.211538  | 0                     | 0          | 1         | 1        |
| Atp8b2_j1  | 6.64251   | 3.90926               | 0          | 1         | 1        |
| Ubp2l_j4   | 2.23586   | 2.4595                | 0          | 1         | 1        |
| Ubp2l_j10  | 0.496858  | 0.827327              | 0          | 1         | 1        |
| Ints3_j1   | 2.11562   | 2.28871               | 0          | 1         | 1        |
| Ints3_j5   | 1.62963   | 2.60999               | 0          | 1         | 1        |
| Npr1       | 0.0476796 | 0.0174889             | -1.44694   | 0.272711  | 1        |
| Snapin     | 24.0537   | 22.3495               | -0.106015  | 0.3019    | 0.648067 |

|                  |           |                        |            |           |           |
|------------------|-----------|------------------------|------------|-----------|-----------|
| 2500003M10Rik_j1 | 7.44853   | 5.92488                | -0.330169  | 0.136186  | 0.45922   |
| 2500003M10Rik_j6 | 0.892833  | 0.727918               | -0.294614  | 0.347118  | 0.685818  |
| S100a9           | 1.11133   | 0.540456               | -1.04004   | 0.262043  | 0.611255  |
| S100a9           | 9.73229   | 3.63605                | -1.42041   | 2.40E-07  | 1.17E-05  |
| 9130204L05Rik_j1 | 0.114387  | 0.16965                | 0.568638   | 0.718927  | 0.898913  |
| 9130204L05Rik_j2 | 0.275732  | 0.0637775              | -2.11215   | 0.265467  | 0.614358  |
| Sprr1a           | 87.4151   | 587.069                | 2.74758    | 0         | 0         |
| XLOC_021484      | 0.256383  | 0 -1.79769e+308        |            | 0.0182979 | 0.132527  |
| Lce6a_j2         | 0.236005  | 0.665372               | 1.49534    | 0.11112   | 0.414977  |
| Lce6a_j3         | 0.119152  | 0.0304528              | -1.96816   | 0.426768  | 1         |
| Lce6a_j4         | 0.112389  | 0.05901                | -0.929473  | 0.603364  | 1         |
| Riiad1_j1        | 0.118759  | 0.0470993              | -1.33426   | 0.137517  | 1         |
| Snx27            | 2.1734    | 2.14287                | 0          | 1         | 1         |
| Tuft1_j3         | 0.0943389 | 0.0408181              | 0          | 1         | 1         |
| Tuft1_j4         | 0.224563  | 0.103822               | 0          | 1         | 1         |
| Cgn_j6           | 0.175217  | 0.105655               | 0          | 1         | 1         |
| Psmb4            | 111.702   | 117.646                | 0          | 1         | 1         |
| Zfp687_j6        | 0.450232  | 0.550622               | 0.290394   | 0.187129  | 0.528052  |
| Psm4             | 8.67086   | 8.39521                | 0          | 1         | 1         |
| Psm4             | 0.591932  | 0.663725               | 0          | 1         | 1         |
| Psm4_j7          | 3.66938   | 4.14658                | 0          | 1         | 1         |
| Pip5k1a          | 1.48587   | 1.49441                | 0          | 1         | 1         |
| Pip5k1a          | 1.77309   | 1.34101                | 0          | 1         | 1         |
| Pip5k1a_j6       | 0.382526  | 0.705546               | 0          | 1         | 1         |
| Scnm1            | 0.114154  | 0.175392               | 0.619602   | 0.25469   | 0.602933  |
| Tnfaip8l2        | 0.323571  | 0.351225               | 0.118316   | 0.77354   | 0.923145  |
| XLOC_021499      | 4.28658   | 4.50638                | 0.0721411  | 0.677788  | 0.878835  |
| Mllt11           | 62.8914   | 68.6401                | 0          | 1         | 1         |
| Mllt11_j3        | 160.283   | 182.09                 | 0          | 1         | 1         |
| Bnip1_j3         | 0.0822678 | 0.0589466              | -0.48092   | 0.573698  | 1         |
| Prune            | 4.09833   | 4.47053                | 0          | 1         | 1         |
| Adamtsl4_j2      | 0         | 0.0743605 1.79769e+308 |            | 0.0248347 | 1         |
| Adamtsl4         | 0.674164  | 1.29244                | 0.938925   | 0.0001435 | 0.0029004 |
| Prpf3_j1         | 2.89588   | 3.18128                | 0.135605   | 0.446476  | 0.753343  |
| Prpf3            | 1.42585   | 1.85655                | 0.3808     | 0.0775073 | 0.337068  |
| Mrps21           | 1.58865   | 1.69408                | 0.0927011  | 0.669166  | 0.87479   |
| Gm129_j2         | 0.19923   | 0.063611               | -1.64709   | 0.162896  | 0.498174  |
| Gm129            | 0.353313  | 0.112161               | -1.65537   | 0.105613  | 0.403642  |
| Gm129_j4         | 0.613819  | 0.0723068              | -3.08561   | 0.133452  | 0.454533  |
| BC028528_j3      | 0.294828  | 0.0788968              | -1.90183   | 0.223669  | 0.570905  |
| BC028528_j2      | 1.079     | 1.01802                | -0.0839287 | 0.852941  | 0.953424  |
| BC028528         | 0.36145   | 0.380481               | 0.0740286  | 0.921291  | 0.975363  |
| BC028528_j4      | 0.903199  | 0.859636               | -0.0713187 | 0.923005  | 0.975988  |
| Car14_j2         | 0.631881  | 0.954045               | 0.594405   | 0.0431322 | 0.235574  |
| Car14_j1         | 0.971555  | 0.736102               | -0.400391  | 0.179636  | 0.519346  |
| Plekho1_j4       | 7.09626   | 11.4729                | 0          | 1         | 1         |
| Plekho1          | 6.05795   | 8.38003                | 0          | 1         | 1         |



|             |           |             |               |           |           |
|-------------|-----------|-------------|---------------|-----------|-----------|
| Vps45       | 4.92839   | 4.9371      | 0.00254813    | 0.98528   | 0.995689  |
| Bola1       | 0.374052  | 0           | -1.79769e+308 | 0.007679  | 0.0706004 |
| Bola1_j3    | 3.57358   | 4.69459     | 0.393631      | 0.246783  | 0.594321  |
| Fcgr1       | 0.52819   | 1.46456     | 1.47134       | 2.28E-11  | 2.59E-09  |
| Polr3gl     | 1.26501   | 1.3022      | 0.0418028     | 0.896665  | 0.967058  |
| Nudt17      | 0.749972  | 1.13277     | 0.594942      | 0.0040708 | 0.0434634 |
| Polr3c_j2   | 1.57118   | 1.75335     | 0             | 1         | 1         |
| Polr3c      | 4.1703    | 3.56272     | 0             | 1         | 1         |
| Gpr89       | 4.27694   | 3.57284     | -0.259507     | 0.0083609 | 0.0749898 |
| Bcl9_j1     | 1.07703   | 0.908242    | 0             | 1         | 1         |
| Bcl9        | 0.602012  | 0.000376065 | 0             | 1         | 1         |
| Bcl9_j4     | 0.664563  | 0.288038    | 0             | 1         | 1         |
| Bcl9_j6     | 0.504779  | 0           | 0             | 1         | 1         |
| Chd1l       | 2.54306   | 2.57029     | 0.015368      | 0.921919  | 0.975553  |
| Pde4dip_j10 | 5.31209   | 5.37751     | 0             | 1         | 1         |
| Pde4dip_j11 | 1.79464   | 1.85565     | 0             | 1         | 1         |
| Phgdh_j3    | 2.02992   | 3.06901     | 0             | 1         | 1         |
| Wdr3        | 2.2932    | 2.49893     | 0.123945      | 0.411583  | 0.73074   |
| Fam46c      | 0.613777  | 0.42351     | -0.535319     | 0.0420937 | 0.231851  |
| Man1a2      | 11.4611   | 9.69965     | 0             | 1         | 1         |
| Ttf2        | 2.55851   | 2.49748     | -0.0348326    | 0.808404  | 0.937029  |
| Ptgfrn_j2   | 8.96146   | 8.386       | 0             | 1         | 1         |
| Ptgfrn      | 4.26129   | 3.80977     | 0             | 1         | 1         |
| Atp1a1_j1   | 156.975   | 170.414     | 0             | 1         | 1         |
| Atp1a1_j2   | 584.725   | 533.67      | 0             | 1         | 1         |
| Atp1a1      | 0.189972  | 0.0853557   | 0             | 1         | 1         |
| XLOC_021543 | 0.168512  | 0.0750604   | -1.16673      | 0.332768  | 0.673875  |
| BC037703    | 0.129682  | 0.185676    | 0.517805      | 0.334777  | 0.675569  |
| Slc22a15    | 0.474105  | 0.382056    | -0.311423     | 0.221907  | 0.569069  |
| Slc22a15    | 0.589988  | 0.590448    | 0.00112439    | 0.996779  | 0.999085  |
| Vangl1      | 0.368021  | 0.576211    | 0             | 1         | 1         |
| Vangl1_j5   | 0.877801  | 0.860109    | 0             | 1         | 1         |
| XLOC_021547 | 0.125302  | 0.069543    | -0.849433     | 0.359361  | 1         |
| XLOC_021547 | 0.192747  | 0.0441089   | -2.12757      | 0.15519   | 0.488329  |
| Olfml3      | 10.931    | 12.0239     | 0.137492      | 0.259291  | 0.608037  |
| Hipk1_j2    | 2.05287   | 0.00174794  | 0             | 1         | 1         |
| Hipk1_j1    | 2.82825   | 2.71627     | 0             | 1         | 1         |
| Dclre1b     | 0.0923964 | 0.100956    | 0.12782       | 0.863888  | 1         |
| Dclre1b     | 0.899297  | 0.760075    | -0.242655     | 0.292106  | 0.638961  |
| Magi3       | 15.0196   | 9.59251     | 0             | 1         | 1         |
| Lrig2_j1    | 8.04236   | 8.27769     | 0.0416085     | 0.724452  | 0.901947  |
| Lrig2       | 3.07412   | 2.68423     | -0.195664     | 0.160837  | 0.495474  |
| Mov10_j2    | 0.159662  | 0.484981    | 0             | 1         | 1         |
| Mov10_j4    | 0.279158  | 0.152261    | 0             | 1         | 1         |
| Capza1_j4   | 0.217044  | 0.172398    | -0.33225      | 0.599362  | 0.841181  |
| Wnt2b       | 3.06612   | 3.17218     | 0.0490598     | 0.663775  | 0.872653  |
| Cttnbp2nl   | 8.03487   | 6.43539     | 0             | 1         | 1         |

|                  |          |           |            |           |           |
|------------------|----------|-----------|------------|-----------|-----------|
| Ddx20_j1         | 1.14974  | 1.39053   | 0.274328   | 0.377139  | 0.708986  |
| Ddx20            | 2.91782  | 2.94258   | 0.0121922  | 0.941906  | 0.982346  |
| Rap1a_j2         | 0.232032 | 0.115076  | -1.01173   | 0.0324223 | 0.195606  |
| 1700027A23Rik    | 0.364953 | 0.364065  | -0.0035176 | 0.994065  | 0.998317  |
| Cept1            | 2.18882  | 2.24636   | 0          | 1         | 1         |
| Cd53             | 1.10755  | 2.59846   | 1.23029    | 1.70E-07  | 8.53E-06  |
| Rbm15            | 0.291588 | 0.4992    | 0.775686   | 0.0028441 | 0.0329978 |
| Kcnc4_j2         | 10.027   | 8.93794   | -0.165871  | 0.0761312 | 0.333255  |
| Slc6a17_j2       | 5.89616  | 3.14053   | 0          | 1         | 1         |
| Slc6a17          | 16.5346  | 11.1431   | 0          | 1         | 1         |
| Fam40a_j3        | 5.49143  | 4.93758   | -0.153376  | 0.398792  | 0.722631  |
| Fam40a           | 11.1238  | 10.9389   | -0.0241869 | 0.823898  | 0.943114  |
| Ahcyl1           | 37.3466  | 33.1484   | 0          | 1         | 1         |
| Csf1_j6          | 0.252362 | 0.272515  | 0          | 1         | 1         |
| Csf1             | 2.70811  | 7.14297   | 0          | 1         | 1         |
| Csf1             | 2.30034  | 3.16441   | 0          | 1         | 1         |
| 4933431E20Rik    | 1.41646  | 0.463657  | -1.61116   | 6.04E-08  | 3.48E-06  |
| 4933431E20Rik    | 1.68377  | 1.09344   | -0.622831  | 0.0038294 | 0.0415871 |
| Gstm4_j2         | 0.139107 | 0.0886336 | -0.650264  | 0.622683  | 0.852399  |
| Gstm4            | 4.45453  | 4.3718    | -0.027044  | 0.880795  | 0.962091  |
| Ampd2_j6         | 5.55093  | 4.80427   | 0          | 1         | 1         |
| Ampd2_j4         | 3.67081  | 2.76612   | 0          | 1         | 1         |
| Gnai3            | 13.0275  | 14.7166   | 0          | 1         | 1         |
| Cyb561d1         | 1.11907  | 1.06695   | 0          | 1         | 1         |
| Cyb561d1         | 0.670411 | 0.746121  | 0          | 1         | 1         |
| Atxn7l2_j1       | 0.471014 | 0.380176  | 0          | 1         | 1         |
| Atxn7l2_j3       | 0.110576 | 0.0350262 | 0          | 1         | 1         |
| AK144267_j1      | 0.122652 | 0.121016  | -0.0193686 | 0.97732   | 1         |
| Celsr2           | 2.22451  | 1.53445   | -0.535762  | 9.25E-05  | 0.0020106 |
| Sars_j1          | 35.2547  | 42.8622   | 0          | 1         | 1         |
| Sars             | 34.7023  | 40.2823   | 0          | 1         | 1         |
| Sars             | 28.2059  | 26.7201   | 0          | 1         | 1         |
| 5330417C22Rik_j3 | 1.69276  | 1.47819   | -0.195552  | 0.240158  | 0.58746   |
| Tmem167b         | 2.91772  | 2.09596   | -0.477233  | 0.0370977 | 0.213277  |
| Tmem167b         | 19.118   | 20.1508   | 0.0759051  | 0.44308   | 0.751132  |
| Gpsm2_j1         | 0.814386 | 0.871128  | 0.0971724  | 0.681878  | 0.880565  |
| Gpsm2            | 2.72409  | 2.66322   | -0.032602  | 0.81136   | 0.938053  |
| Stxbp3a_j1       | 1.02934  | 0.722831  | -0.509985  | 0.203201  | 0.547149  |
| Prpf38b_j3       | 3.92026  | 3.82616   | 0          | 1         | 1         |
| Prpf38b          | 3.99594  | 3.87699   | 0          | 1         | 1         |
| Fam102b          | 24.8847  | 20.8751   | 0          | 1         | 1         |
| XLOC_021596      | 0.103228 | 8.75E-05  | -10.2044   | 0.89281   | 1         |
| Ntng1_j3         | 0.712695 | 0.213998  | 0          | 1         | 1         |
| Ntng1_j4         | 0.872365 | 1.1847    | 0          | 1         | 1         |
| Prmt6            | 1.09206  | 1.22173   | 0.16187    | 0.408788  | 0.729001  |
| Gm5548           | 1.47547  | 1.75688   | 0.251839   | 0.459578  | 0.761442  |
| Rnpc3_j2         | 3.05556  | 2.32111   | 0          | 1         | 1         |

|               |           |                 |            |           |           |
|---------------|-----------|-----------------|------------|-----------|-----------|
| S1pr1_j1      | 3.99451   | 3.54533         | 0          | 1         | 1         |
| S1pr1         | 2.07736   | 2.24609         | 0          | 1         | 1         |
| A930005H10Rik | 2.42205   | 2.61446         | 0.110285   | 0.673461  | 0.876946  |
| Slc30a7       | 1.04995   | 0.840622        | 0          | 1         | 1         |
| Vcam1         | 1.37457   | 1.70496         | 0.31076    | 0.0868282 | 0.36018   |
| Cdc14a        | 0.571784  | 0.38795         | -0.5596    | 0.0890392 | 0.365707  |
| Rtcd1         | 43.8631   | 43.0846         | -0.0258339 | 0.789184  | 0.929678  |
| Gm4596        | 78.4263   | 79.4919         | 0.0194707  | 0.863465  | 0.956634  |
| Ccdc76_j3     | 0.598591  | 0.573528        | -0.0617056 | 0.866906  | 0.957889  |
| Hiat1         | 15.5083   | 11.8256         | 0          | 1         | 1         |
| Slc35a3_j2    | 0.268074  | 0.132377        | -1.01798   | 0.104467  | 0.401025  |
| Agl_j2        | 14.424    | 11.6546         | 0          | 1         | 1         |
| Agl_j3        | 5.6485    | 3.92223         | 0          | 1         | 1         |
| Agl           | 3.25608   | 2.10227         | 0          | 1         | 1         |
| Palmd_j3      | 5.04241   | 4.94298         | 0          | 1         | 1         |
| Palmd         | 10.2977   | 9.4172          | 0          | 1         | 1         |
| Palmd_j4      | 0.603288  | 0.353704        | 0          | 1         | 1         |
| D3Bwg0562e    | 1.36415   | 0.895791        | 0          | 1         | 1         |
| Snx7          | 59.6434   | 55.5714         | -0.102019  | 0.245747  | 0.593119  |
| XLOC_021619   | 0.067998  | 0.0690348       | 0.0218306  | 0.988467  | 1         |
| Ptbp2_j5      | 3.60415   | 5.90083         | 0          | 1         | 1         |
| Ptbp2         | 8.22321   | 6.53565         | 0          | 1         | 1         |
| Ptbp2         | 12.8689   | 11.5387         | 0          | 1         | 1         |
| XLOC_021623   | 0.161798  | 0.0935368       | -0.790587  | 0.235824  | 0.583087  |
| Rwdd3_j5      | 0.244006  | 0 -1.79769e+308 | 0.0003012  | 0.0003012 | 0.0053603 |
| Rwdd3_j6      | 0.368847  | 0.295704        | -0.318869  | 0.613326  | 0.847491  |
| Rwdd3         | 0.688852  | 0.451284        | -0.610159  | 0.166994  | 0.503276  |
| Tmem56        | 10.3659   | 6.87353         | 0          | 1         | 1         |
| Tmem56        | 1.26335   | 0.317762        | 0          | 1         | 1         |
| Abcd3_j2      | 0.202542  | 0.210555        | 0          | 1         | 1         |
| Fnbp1l_j7     | 2.0889    | 2.93273         | 0          | 1         | 1         |
| Fnbp1l_j5     | 1.80399   | 1.62013         | 0          | 1         | 1         |
| Fnbp1l        | 1.55605   | 1.70399         | 0          | 1         | 1         |
| AK016661_j1   | 4.59287   | 7.5315          | 0.713542   | 0.0105855 | 0.089165  |
| Usp53_j4      | 0.0799044 | 0 -1.79769e+308 | 0.0002385  | 0.0002385 | 1         |
| Usp53         | 0.278771  | 0.137033        | -1.02456   | 0.0263982 | 0.170737  |
| Mettl14_j2    | 0.545753  | 0.792622        | 0.538386   | 0.162153  | 0.497486  |
| Mettl14       | 7.16405   | 7.19856         | 0.00693239 | 0.95648   | 0.987617  |
| BC096391      | 2.6235    | 2.71814         | 0.0511276  | 0.772834  | 0.922935  |
| Ndst3_j4      | 0.69414   | 0.558196        | 0          | 1         | 1         |
| Ndst3_j5      | 1.73276   | 1.26233         | 0          | 1         | 1         |
| Ndst3         | 0.250158  | 0.0226656       | 0          | 1         | 1         |
| XLOC_021641   | 0.269298  | 0.114679        | -1.2316    | 0.132149  | 0.452308  |
| Ugt8a         | 0.954504  | 0.971595        | 0.0256039  | 0.886964  | 0.964085  |
| Ank2_j2       | 0.164665  | 0.0459875       | 0          | 1         | 1         |
| Larp7_j2      | 0.62172   | 0.159187        | -1.96554   | 0.0038821 | 0.0420187 |
| Ap1ar_j6      | 5.02142   | 17.7276         | 0          | 1         | 1         |

|             |            |           |            |           |           |
|-------------|------------|-----------|------------|-----------|-----------|
| Ap1ar_j2    | 26.7334    | 19.2168   | 0          | 1         | 1         |
| Gm9387      | 2.63991    | 2.27893   | -0.212133  | 0.34417   | 0.683975  |
| Enpep_j2    | 1.18845    | 0.792654  | -0.584319  | 0.238516  | 0.585436  |
| Enpep       | 0.906585   | 0.470518  | -0.946193  | 0.0012075 | 0.0166308 |
| Egf_j3      | 0.100482   | 0.0366956 | -1.45326   | 0.206677  | 1         |
| Gar1_j1     | 2.60758    | 3.0868    | 0.243398   | 0.347959  | 0.686605  |
| Gar1        | 3.34925    | 3.5928    | 0.101268   | 0.663068  | 0.872404  |
| Ccdc109b    | 10.0982    | 11.9135   | 0.238501   | 0.0723087 | 0.323616  |
| Sec24b_j2   | 4.47247    | 5.83865   | 0          | 1         | 1         |
| Sec24b      | 5.46769    | 4.6047    | 0          | 1         | 1         |
| Ostc        | 45.5046    | 45.8176   | 0.00988989 | 0.921667  | 0.975486  |
| Rpl34_j4    | 0.641544   | 0.753402  | 0.231872   | 0.712296  | 0.895662  |
| Hadh        | 22.3016    | 24.2063   | 0.118236   | 0.246776  | 0.594321  |
| Cyp2u1_j1   | 0.537355   | 0.56269   | 0.0664636  | 0.824187  | 0.943114  |
| Cyp2u1      | 1.7382     | 1.24088   | -0.486228  | 0.0130662 | 0.10448   |
| Cyp2u1_j2   | 0.396203   | 0.0852211 | -2.21696   | 0.0239581 | 0.159576  |
| Cyp2u1_j4   | 1.16788    | 1.12505   | -0.0539081 | 0.844994  | 0.950963  |
| Sgms2_j1    | 3.61143    | 2.76068   | 0          | 1         | 1         |
| Sgms2_j2    | 0.988116   | 0.639717  | 0          | 1         | 1         |
| Aimp1_j1    | 24.5589    | 25.7504   | 0.0683507  | 0.561709  | 0.821809  |
| Aimp1       | 8.49299    | 10.0059   | 0.236502   | 0.134595  | 0.4566    |
| Gstcd       | 0.838033   | 0.948123  | 0          | 1         | 1         |
| Tet2_j1     | 0.505896   | 0.425772  | 0          | 1         | 1         |
| Tet2        | 0.296087   | 0.166721  | 0          | 1         | 1         |
| Cisd2       | 2.86672    | 2.95951   | 0.0459586  | 0.782344  | 0.926474  |
| Nfkb1       | 2.48358    | 0.309893  | -3.00258   | 8.88E-15  | 1.68E-12  |
| Dapp1_j1    | 0.0873051  | 0.124407  | 0.510925   | 0.550912  | 1         |
| Gm5105_j1   | 0.158335   | 0.100289  | -0.658813  | 0.221634  | 0.568841  |
| Metap1      | 16.3221    | 15.8897   | 0          | 1         | 1         |
| Rap1gds1    | 97.1452    | 103.575   | 0          | 1         | 1         |
| Rap1gds1_j1 | 0.0823259  | 0.172019  | 0          | 1         | 1         |
| Pdlim5_j3   | 4.47874    | 4.299     | 0          | 1         | 1         |
| Pdlim5_j2   | 1.51491    | 0.846958  | 0          | 1         | 1         |
| Pkn2_j3     | 2.27081    | 2.56027   | 0.173087   | 0.400761  | 0.724158  |
| Pkn2        | 2.86177    | 2.68992   | -0.0893437 | 0.511739  | 0.79169   |
| XLOC_021687 | 0.398318   | 0.108654  | -1.87418   | 0.0535862 | 0.269557  |
| Lmo4        | 13.7368    | 14.4033   | 0.0683574  | 0.621887  | 0.851999  |
| Lmo4        | 6.61557    | 6.68914   | 0.015955   | 0.91878   | 0.974658  |
| Hs2st1      | 10.0042    | 10.9485   | 0.130128   | 0.177967  | 0.517317  |
| Sh3glb1_j1  | 16.3697    | 20.6161   | 0          | 1         | 1         |
| Sh3glb1_j2  | 1.55268    | 2.07672   | 0          | 1         | 1         |
| Sh3glb1     | 0.00648969 | 0.242399  | 0          | 1         | 1         |
| Sh3glb1     | 3.61343    | 4.20814   | 0          | 1         | 1         |
| Cyr61       | 0.526768   | 0.447393  | -0.235623  | 0.549788  | 0.814949  |
| Spata1_j2   | 0.810467   | 0.362374  | -1.16127   | 0.0034594 | 0.0385782 |
| Rpf1        | 1.00134    | 1.17802   | 0.234436   | 0.241356  | 0.588455  |
| Prkacb      | 7.17926    | 4.57794   | 0          | 1         | 1         |

|                  |           |           |              |           |           |
|------------------|-----------|-----------|--------------|-----------|-----------|
| Prkacb_j1        | 30.1382   | 26.6782   | 0            | 1         | 1         |
| Prkacb           | 25.3747   | 19.3013   | 0            | 1         | 1         |
| Prkacb           | 8.60007   | 6.86523   | 0            | 1         | 1         |
| Gm10288          | 263.296   | 293.265   | 0.155517     | 0.0731018 | 0.325521  |
| Lphn2_j7         | 1.22336   | 1.58469   | 0.373349     | 0.218677  | 0.564944  |
| Lphn2_j8         | 1.03548   | 0.552827  | -0.905396    | 0.0013105 | 0.017754  |
| Lphn2_j9         | 0.348287  | 0.214861  | -0.696875    | 0.0942532 | 0.378356  |
| Lphn2_j10        | 0.152991  | 0.0448139 | -1.77143     | 0.0347601 | 0.204791  |
| Rpsa-ps10        | 115.387   | 139.547   | 0            | 1         | 1         |
| Ifi44_j4         | 0.0718958 | 0.0515337 | -0.48039     | 0.730088  | 1         |
| Ptgfr            | 0.457109  | 0.247844  | -0.883104    | 0.0007122 | 0.010879  |
| Gipc2_j1         | 0.148122  | 0.011562  | -3.67932     | 0.0616557 | 0.293515  |
| Semcap2          | 0.114343  | 0.0385137 | -1.56993     | 0.161562  | 1         |
| Dnajb4           | 15.9381   | 12.9939   | 0            | 1         | 1         |
| Dnajb4_j5        | 0.492065  | 0         | 0            | 1         | 1         |
| Nexn_j4          | 0.289247  | 0.307139  | 0            | 1         | 1         |
| Nexn_j3          | 2.88792   | 2.49314   | 0            | 1         | 1         |
| Fam73a           | 13.4003   | 11.65     | 0            | 1         | 1         |
| Ak5              | 0.47284   | 0.430222  | 0            | 1         | 1         |
| Ak5_j3           | 9.31949   | 5.36075   | 0            | 1         | 1         |
| St6galnac5       | 2.79391   | 2.34857   | 0            | 1         | 1         |
| St6galnac3_j5    | 0.3977    | 0.373796  | -0.0894308   | 0.74791   | 0.912311  |
| St6galnac3       | 0.569943  | 0.306678  | -0.894091    | 0.0022148 | 0.0270289 |
| Rabggtb          | 2.6944    | 2.5756    | -0.0650565   | 0.805354  | 0.935633  |
| Rabggtb          | 25.9415   | 26.2237   | 0.0156063    | 0.884496  | 0.963396  |
| Acadm_j1         | 1.07045   | 0.71795   | -0.576257    | 0.277026  | 0.626093  |
| Acadm            | 15.8497   | 13.7378   | -0.20631     | 0.0632967 | 0.298383  |
| Fpgt_j2          | 2.43963   | 2.30503   | 0            | 1         | 1         |
| Fpgt_j3          | 0.981187  | 0.274729  | 0            | 1         | 1         |
| Fpgt             | 3.90652   | 3.81502   | 0            | 1         | 1         |
| AK016265_j1      | 0.12071   | 0.0474834 | -1.34605     | 0.199173  | 1         |
| BC048612         | 0.141614  | 0.204517  | 0.530255     | 0.561323  | 0.821749  |
| AK076987_j1      | 0.352287  | 0.376178  | 0.0946617    | 0.885863  | 0.963769  |
| Srsf11_j4        | 5.43625   | 4.24489   | 0            | 1         | 1         |
| Srsf11           | 8.57965   | 8.43577   | 0            | 1         | 1         |
| Fabp5_j2         | 27.1035   | 31.3098   | 0            | 1         | 1         |
| Raly1_j7         | 7.4497    | 5.3926    | -0.466202    | 0.0588886 | 0.285332  |
| E2f5_j1          | 2.46404   | 2.15144   | 0            | 1         | 1         |
| Car3_j2          | 0.137965  | 0.425143  | 1.62365      | 0.0388231 | 0.219672  |
| Ythdf3_j1        | 0         | 0.133893  | 1.79769e+308 | 0.0225348 | 1         |
| 2610100L16Rik_j3 | 0.0824614 | 0.120641  | 0.548934     | 0.62317   | 1         |
| Dnajc5b_j2       | 0.227043  | 0.259     | 0.189988     | 0.833406  | 0.946357  |
| Dnajc5b_j4       | 0         | 0.0536674 | 1.79769e+308 | 0.137229  | 1         |
| Cp               | 3.42515   | 3.53448   | 0            | 1         | 1         |
| XLOC_020778      | 0.0911346 | 0.05891   | -0.629488    | 0.756708  | 1         |
| Pld1_j5          | 0.453427  | 0.270365  | -0.745962    | 0.0624677 | 0.295763  |
| Pld1_j8          | 1.56502   | 1.7262    | 0.14142      | 0.576777  | 0.829176  |

|                  |            |                 |              |           |           |
|------------------|------------|-----------------|--------------|-----------|-----------|
| Tnik_j1          | 8.07224    | 15.7155         | 0            | 1         | 1         |
| Rpl22l1_j5       | 2.44579    | 3.20153         | 0.388463     | 0.212647  | 0.557702  |
| Egfem1_j6        | 0.279132   | 0 -1.79769e+308 |              | 1.11E-05  | 0.0003383 |
| Egfem1_j13       | 0.111308   | 0 -1.79769e+308 |              | 0.0064897 | 1         |
| Gpr160_j4        | 0.110421   | 5.37E-05        | -11.0054     | 0.962784  | 1         |
| Gpr160_j8        | 0.0690763  | 0 -1.79769e+308 |              | 0.0388153 | 1         |
| Gpr160_j12       | 0.0792957  | 0.07306         | -0.118161    | 0.926027  | 1         |
| Prkci_j1         | 6.3442     | 6.14824         | 0            | 1         | 1         |
| AK162138_j2      | 0.0816939  | 0.0924852       | 0            | 1         | 1         |
| Pik3ca_j3        | 1.47946    | 1.8863          | 0.350485     | 0.103127  | 0.398042  |
| Zfp639_j2        | 3.15771    | 4.52712         | 0            | 1         | 1         |
| Mfn1             | 7.12993    | 7.33417         | 0            | 1         | 1         |
| XLOC_020802      | 0.0840663  | 0.102884        | 0.291421     | 0.739565  | 1         |
| Ndufb5_j1        | 70.9133    | 61.9261         | 0            | 1         | 1         |
| Usp13_j2         | 3.31772    | 3.82468         | 0            | 1         | 1         |
| Ttc14_j2         | 0.076789   | 0.478066        | 2.63824      | 4.15E-11  | 4.55E-09  |
| XLOC_020809      | 0.112743   | 0.06622         | -0.7677      | 0.395494  | 1         |
| Fxr1_j3          | 12.0965    | 16.7481         | 0            | 1         | 1         |
| Sox2ot_j3        | 0.583099   | 0.461908        | -0.336134    | 0.37714   | 0.708986  |
| Atp11b_j9        | 2.76568    | 2.37188         | -0.221603    | 0.211116  | 0.555924  |
| 4932438A13Rik_j6 | 0.218773   | 0.228228        | 0.0610448    | 0.935441  | 0.980308  |
| 4932438A13Rik_j9 | 0.373998   | 0.25633         | -0.545028    | 0.351596  | 0.688851  |
| Spata5_j4        | 0.316012   | 0.228899        | -0.465264    | 0.488873  | 0.779314  |
| Spata5_j3        | 0.150962   | 0.231326        | 0.615748     | 0.353283  | 0.689807  |
| Spata5           | 2.0898     | 2.44926         | 0.228983     | 0.213942  | 0.5592    |
| Fat4_j1          | 1.03894    | 1.07113         | 0.0440095    | 0.818167  | 0.941026  |
| Intu_j1          | 0.0830899  | 0.226709        | 1.4481       | 0.158832  | 0.49326   |
| AK009813         | 0.0335184  | 0.0603458       | 0            | 1         | 1         |
| 3110057O12Rik    | 0.600197   | 0.864811        | 0.526948     | 0.321015  | 0.664122  |
| Phf17_j2         | 0.915145   | 1.09895         | 0            | 1         | 1         |
| Phf17_j3         | 0.467114   | 0.314891        | 0            | 1         | 1         |
| Phf17_j5         | 0.0576236  | 0.303945        | 0            | 1         | 1         |
| Pcdh10_j2        | 1.1413     | 1.95483         | 0            | 1         | 1         |
| Naa15_j2         | 0.727277   | 1.04614         | 0            | 1         | 1         |
| XLOC_020844      | 0.196015   | 0.0901614       | -1.12038     | 0.231284  | 0.578377  |
| Mgst2_j3         | 0.0430301  | 0.174721        | 2.02163      | 0.113804  | 0.419484  |
| 2810046L04Rik_j1 | 0.944396   | 0.529777        | -0.834008    | 0.0086419 | 0.0769123 |
| Trpc4_j2         | 0.495927   | 0.513036        | 0.0489318    | 0.885511  | 0.963679  |
| Trpc4_j1         | 0.00151675 | 0.108868        | 6.16546      | 0.308088  | 1         |
| Fam48a_j2        | 1.66768    | 1.1391          | -0.54995     | 0.0338886 | 0.201508  |
| Eif2a            | 2.23301    | 2.11844         | 0            | 1         | 1         |
| Eif2a_j2         | 0.394177   | 0.652826        | 0            | 1         | 1         |
| Gm8234           | 0.0523781  | 0 -1.79769e+308 |              | 0.0568059 | 1         |
| Med12l_j8        | 0.0840196  | 0.0292079       | -1.52437     | 0.289336  | 1         |
| Med12l_j9        | 0          | 0.315942        | 1.79769e+308 | 0.0001567 | 0.0031299 |
| Med12l_j10       | 0.445336   | 0.0991449       | -2.16728     | 0.0151759 | 0.115892  |
| Med12l_j11       | 3.45427    | 3.0429          | -0.182933    | 0.175576  | 0.514069  |

|               |           |           |               |           |          |
|---------------|-----------|-----------|---------------|-----------|----------|
| Mbnl1_j7      | 2.33795   | 2.55595   | 0.128618      | 0.649713  | 0.86543  |
| Mbnl1_j6      | 3.76305   | 2.78481   | -0.434322     | 0.0454977 | 0.244196 |
| Mbnl1_j10     | 2.24985   | 1.71569   | -0.391037     | 0.210847  | 0.555568 |
| Mbnl1_j12     | 4.70278   | 4.08374   | -0.203625     | 0.323127  | 0.666115 |
| P2ry1_j1      | 2.99408   | 1.79134   | 0             | 1         | 1        |
| P2ry1         | 1.17132   | 1.02532   | 0             | 1         | 1        |
| P2ry1         | 2.55745   | 1.88904   | 0             | 1         | 1        |
| Lekr1_j1      | 0         | 0.154066  | 1.79769e+308  | 0.0094346 | 1        |
| Smc4          | 0.358159  | 0.311719  | 0             | 1         | 1        |
| Ppm1_j2       | 0         | 0.0752276 | 0             | 1         | 1        |
| Serpini1_j2   | 42.6658   | 37.8299   | -0.173554     | 0.0775469 | 0.337104 |
| Fstl5_j1      | 2.47483   | 1.75871   | 0             | 1         | 1        |
| Fam198b       | 0.721459  | 0.588631  | 0             | 1         | 1        |
| Mtap9_j3      | 7.63771   | 7.73365   | 0             | 1         | 1        |
| Tmem154_j2    | 0.130487  | 0.0526315 | -1.3099       | 0.236288  | 1        |
| Tmem154_j3    | 0         | 0.125309  | 1.79769e+308  | 0.0145816 | 1        |
| Fbxw7_j3      | 5.69771   | 7.30094   | 0             | 1         | 1        |
| Sh3d19_j2     | 3.14336   | 3.77118   | 0             | 1         | 1        |
| Sh3d19_j5     | 0.58639   | 0.414395  | 0             | 1         | 1        |
| Lba           | 0.158269  | 0.14054   | -0.171397     | 0.851846  | 0.952976 |
| Lrba_j9       | 0.0752492 | 0.0712386 | -0.0790171    | 0.952041  | 1        |
| Lrba_j10      | 0.268794  | 0.116016  | -1.21217      | 0.159027  | 0.493518 |
| Arhgef11_j4   | 6.63202   | 6.45291   | 0             | 1         | 1        |
| Arhgef11_j12  | 3.80669   | 7.43477   | 0             | 1         | 1        |
| Insrr_j6      | 0.36245   | 0.449843  | 0.311638      | 0.574831  | 0.828142 |
| Hdgf          | 1.57632   | 1.38802   | 0             | 1         | 1        |
| Nes_j1        | 0.935181  | 1.17684   | 0             | 1         | 1        |
| Iqgap3_j1     | 0.0902384 | 0         | -1.79769e+308 | 0.0004436 | 1        |
| Iqgap3_j4     | 0.286825  | 0.159456  | -0.847009     | 0.138132  | 0.462105 |
| Mef2d_j4      | 4.02433   | 3.73134   | 0             | 1         | 1        |
| Mef2d_j6      | 4.50122   | 2.85404   | 0             | 1         | 1        |
| Smg5_j3       | 15.0591   | 15.746    | 0             | 1         | 1        |
| Paqr6         | 5.51706   | 4.80757   | 0             | 1         | 1        |
| Paqr6_j7      | 2.56228   | 3.03851   | 0             | 1         | 1        |
| Ubqln4_j1     | 0.356664  | 0.601685  | 0             | 1         | 1        |
| Arhgef2_j1    | 0.170672  | 0.0975311 | 0             | 1         | 1        |
| Arhgef2       | 0         | 0.077366  | 0             | 1         | 1        |
| 2810403A07Rik | 5.8975    | 5.41013   | 0             | 1         | 1        |
| Fam189b_j1    | 103.581   | 107.54    | 0             | 1         | 1        |
| Muc1_j1       | 0         | 0.0612216 | 1.79769e+308  | 0.164193  | 1        |
| Krtcap2       | 12.4093   | 14.9388   | 0.267638      | 0.0689339 | 0.314786 |
| Krtcap2_j1    | 41.6632   | 48.9114   | 0.231398      | 0.091598  | 0.371965 |
| Dpm3_j1       | 1.46037   | 2.32797   | 0.672744      | 0.0525905 | 0.266364 |
| Shc1_j1       | 1.16081   | 1.2646    | 0.123552      | 0.593269  | 0.83794  |
| Shc1_j10      | 1.23235   | 1.12556   | -0.130763     | 0.619368  | 0.850656 |
| Adar          | 3.63392   | 3.89386   | 0.0996742     | 0.398576  | 0.722606 |
| Dennd4b       | 5.8794    | 5.58178   | -0.0749446    | 0.500314  | 0.785042 |

|             |           |                       |           |           |           |
|-------------|-----------|-----------------------|-----------|-----------|-----------|
| Gatad2b_j2  | 1.25481   | 1.07391               | -0.224606 | 0.278453  | 0.627426  |
| S100a13     | 19.4909   | 22.4215               | 0.202082  | 0.106761  | 0.405895  |
| S100a2_j1   | 0.0597991 | 0 -1.79769e+308       |           | 0.104629  | 1         |
| S100a3      | 0.100404  | 0.281853              | 1.48913   | 0.302152  | 0.648301  |
| S100a4_j1   | 5.44527   | 7.70659               | 0         | 1         | 1         |
| S100a5      | 0.127952  | 0 -1.79769e+308       |           | 0.039572  | 1         |
| S100a6_j2   | 314.068   | 525.022               | 0.741301  | 0         | 0         |
| S100a8      | 13.0207   | 4.93174               | -1.40063  | 3.77E-08  | 2.29E-06  |
| Rorc_j1     | 0.148579  | 0.242149              | 0.704665  | 0.285677  | 0.634462  |
| Rorc_j3     | 0.20676   | 0.100959              | -1.03418  | 0.309891  | 0.654446  |
| Tdrkh_j1    | 0.107486  | 0.0642381             | 0         | 1         | 1         |
| Tdrkh_j4    | 7.14763   | 7.60201               | 0         | 1         | 1         |
| Selenbp2_j1 | 0.451555  | 0.683451              | 0         | 1         | 1         |
| Pogz_j1     | 0.190762  | 0.639018              | 0         | 1         | 1         |
| Pogz_j8     | 3.18007   | 3.28148               | 0         | 1         | 1         |
| Rfx5_j3     | 0.436049  | 0.388397              | -0.166958 | 0.642949  | 0.862213  |
| Pi4kb_j1    | 2.59955   | 2.33521               | -0.154713 | 0.29977   | 0.64635   |
| Pi4kb_j4    | 1.60083   | 2.34729               | 0.552175  | 0.001673  | 0.0216419 |
| Sema6c_j1   | 0.226704  | 0.530537              | 0         | 1         | 1         |
| Sema6c_j7   | 0.827466  | 0.356902              | 0         | 1         | 1         |
| Fam63a_j3   | 5.0306    | 5.24348               | 0         | 1         | 1         |
| Fam63a      | 14.3925   | 14.6359               | 0         | 1         | 1         |
| Ctss_j1     | 0.359371  | 0.48553               | 0.434087  | 0.533518  | 0.805159  |
| Anp32e      | 0.909003  | 1.3431                | 0.563205  | 0.0446396 | 0.241238  |
| Sf3b4_j5    | 0.477836  | 0.391198              | 0         | 1         | 1         |
| Sv2a_j2     | 1.24843   | 0.904186              | 0         | 1         | 1         |
| Sv2a_j3     | 6.8615    | 6.3919                | 0         | 1         | 1         |
| Rbm8a       | 2.21727   | 3.1724                | 0         | 1         | 1         |
| Itga10_j7   | 0.15864   | 0.0519345             | -1.61099  | 0.389109  | 0.716374  |
| Ankrd35     | 0         | 0.243285 1.79769e+308 |           | 0.0002041 | 0.0039027 |
| Pias3       | 6.13303   | 6.28358               | 0.0349863 | 0.792822  | 0.931005  |
| XLOC_021040 | 0.154183  | 0.111409              | -0.468774 | 0.562354  | 0.822121  |
| Fmo5        | 0.0618553 | 0 -1.79769e+308       |           | 0.0026586 | 1         |
| Gm5544_j1   | 0.289472  | 0.576442              | 0.993754  | 0.0551666 | 0.274103  |
| Csde1_j2    | 15.7803   | 16.7424               | 0         | 1         | 1         |
| Nras_j1     | 13.4693   | 17.0779               | 0.342455  | 0.0008583 | 0.0126504 |
| Syt6        | 2.54576   | 1.79286               | 0         | 1         | 1         |
| Syt6_j5     | 1.18148   | 1.70731               | 0         | 1         | 1         |
| Syt6_j8     | 2.27697   | 1.86473               | 0         | 1         | 1         |
| Rsb1        | 2.60523   | 1.99275               | 0         | 1         | 1         |
| Phtf1_j10   | 0.37983   | 0.328659              | 0         | 1         | 1         |
| Slc16a1_j2  | 4.33699   | 5.12182               | 0         | 1         | 1         |
| Ppm1j_j1    | 10.1653   | 13.3146               | 0         | 1         | 1         |
| Ppm1j_j5    | 4.44029   | 4.37833               | 0         | 1         | 1         |
| Ppm1j_j8    | 17.5255   | 18.6846               | 0         | 1         | 1         |
| Rhoc_j4     | 1.76368   | 6.72292               | 0         | 1         | 1         |
| Slc16a4_j2  | 0.369348  | 0.09915               | -1.8973   | 0.0462429 | 0.246485  |



|                  |           |                       |            |           |           |
|------------------|-----------|-----------------------|------------|-----------|-----------|
| Gstm5            | 8.40623   | 8.27637               | -0.02246   | 0.815792  | 0.940076  |
| Psm5_j5          | 0.713309  | 1.26841               | 0.830425   | 0.201582  | 0.54514   |
| Sort1            | 1.76913   | 1.66965               | 0          | 1         | 1         |
| Sort1            | 1.99086   | 1.61332               | 0          | 1         | 1         |
| Taf13_j1         | 24.3343   | 26.9019               | 0.144714   | 0.169548  | 0.506525  |
| Slc25a24_j1      | 0.990541  | 1.72754               | 0.802431   | 0.0036894 | 0.0405456 |
| Extl2            | 7.90289   | 4.32176               | 0          | 1         | 1         |
| Dbt_j1           | 0.0833155 | 0.0549506             | -0.600449  | 0.590236  | 1         |
| Sass6            | 1.37427   | 1.12552               | 0          | 1         | 1         |
| AK076759_j2      | 0.383899  | 0.399741              | 0          | 1         | 1         |
| XLOC_021122      | 0.378734  | 0.506851              | 0          | 1         | 1         |
| XLOC_021122      | 0.125027  | 0.148204              | 0          | 1         | 1         |
| Dpyd             | 2.36787   | 2.4826                | 0.0682638  | 0.646748  | 0.863884  |
| Arhgap29_j3      | 0.301136  | 0.0312286             | 0          | 1         | 1         |
| Arhgap29_j6      | 0.768072  | 1.04391               | 0          | 1         | 1         |
| Prss12_j2        | 6.37617   | 11.4654               | 0.846525   | 2.95E-05  | 0.0007625 |
| Cfi_j2           | 0.177549  | 0.25046               | 0.49636    | 0.419197  | 0.735872  |
| Casp6            | 1.47973   | 2.16701               | 0.55037    | 0.0037901 | 0.0413077 |
| Lef1_j2          | 0.196949  | 0.18084               | -0.123109  | 0.829212  | 0.944898  |
| Tbck_j1          | 1.00564   | 1.1084                | 0          | 1         | 1         |
| Ppa2_j3          | 15.2223   | 15.2033               | 0          | 1         | 1         |
| Ppa2_j6          | 6.44333   | 4.73957               | 0          | 1         | 1         |
| XLOC_021160      | 0.0781918 | 0.0264358             | -1.56452   | 0.595638  | 1         |
| Bdh2             | 0.313803  | 0.0288416             | -3.44364   | 0.0518154 | 0.263999  |
| Ube2d2b_j7       | 64.8396   | 67.6071               | 0.0602983  | 0.48939   | 0.779561  |
| Manba_j5         | 1.2192    | 1.3373                | 0.133387   | 0.651482  | 0.866264  |
| Ppp3ca_j8        | 0         | 0.0973887             | 0          | 1         | 1         |
| XLOC_021173      | 0.460101  | 0.271694              | -0.759969  | 0.452465  | 0.757592  |
| Emcn_j1          | 0.275144  | 0.199099              | -0.466701  | 0.605943  | 0.844806  |
| XLOC_021177      | 0.158104  | 0.133999              | -0.238656  | 0.785337  | 0.928086  |
| Mapksp1_j11      | 0.692661  | 0.646423              | -0.0996689 | 0.773149  | 0.923046  |
| Rg9mtd2_j2       | 2.62084   | 2.63732               | 0          | 1         | 1         |
| Adh7             | 0.179754  | 0.509874              | 1.50412    | 0.0005739 | 0.0091439 |
| Tspan5_j3        | 7.1191    | 8.61056               | 0          | 1         | 1         |
| Unc5c_j2         | 0.180903  | 0 -1.79769e+308       | 0.0002672  | 0.0002672 | 0.0048656 |
| Gbp3_j3          | 1.17797   | 1.57805               | 0          | 1         | 1         |
| Gbp1_j1          | 0.825488  | 0.859779              | 0.058718   | 0.876574  | 0.960772  |
| XLOC_021191      | 0.0614353 | 0 -1.79769e+308       | 0.116952   | 0.116952  | 1         |
| Odf2l_j3         | 0.0494656 | 0.0338526             | -0.547159  | 0.721466  | 1         |
| Col24a1_j11      | 0.323349  | 0.134815              | 0          | 1         | 1         |
| Col24a1_j12      | 4.83769   | 6.38663               | 0          | 1         | 1         |
| Ddah1_j2         | 5.26524   | 6.64016               | 0          | 1         | 1         |
| Bcl10_j1         | 0.842215  | 0.97381               | 0.209452   | 0.615411  | 0.848303  |
| 2410004B18Rik_j3 | 0.117507  | 0.346676              | 1.56084    | 0.222595  | 0.569566  |
| Mcoln2_j6        | 0.143286  | 0.176522              | 0.300949   | 0.665401  | 0.873092  |
| Mcoln2_j8        | 0.0719988 | 0.228759              | 1.66779    | 0.120936  | 0.433073  |
| Mcoln2_j9        | 0         | 0.115481 1.79769e+308 | 0.0877998  | 0.0877998 | 1         |

|                  |           |                 |             |           |           |
|------------------|-----------|-----------------|-------------|-----------|-----------|
| Ssx2ip           | 4.10484   | 9.61026         | 0           | 1         | 1         |
| Ctbs_j2          | 0.0680071 | 0.0242478       | -1.48783    | 0.275318  | 1         |
| Elt1d1_j1        | 0.402102  | 0.449805        | 0           | 1         | 1         |
| Fubp1            | 4.08082   | 4.53329         | 0           | 1         | 1         |
| Fubp1_j11        | 1.08205   | 0.461614        | 0           | 1         | 1         |
| Fubp1_j10        | 1.31718   | 0.618217        | 0           | 1         | 1         |
| Usp33_j1         | 0.186396  | 0.174871        | 0           | 1         | 1         |
| Zzz3_j1          | 0.379675  | 0.348314        | 0           | 1         | 1         |
| Zzz3_j4          | 1.69683   | 1.27583         | 0           | 1         | 1         |
| XLOC_021218      | 0.255731  | 0.0948704       | -1.4306     | 0.0809671 | 0.346426  |
| XLOC_021218      | 0.121408  | 0.179024        | 0.560288    | 0.63761   | 0.859668  |
| Pigk_j2          | 3.7244    | 1.47197         | -1.33926    | 3.37E-06  | 0.0001202 |
| Gm3076           | 1.39508   | 1.39409         | -0.00102556 | 0.997819  | 0.999228  |
| Cryz             | 1.87863   | 1.6368          | -0.198804   | 0.366598  | 0.700205  |
| Cryz_j2          | 0.244651  | 0.213378        | -0.197319   | 0.774721  | 0.923737  |
| 4922501L14Rik_j8 | 0.0746234 | 0               | 0           | 1         | 1         |
| Lrriq3_j4        | 0.220392  | 0.0516132       | -2.09426    | 0.0826191 | 0.350326  |
| Lrrc40_j1        | 3.66542   | 3.71234         | 0           | 1         | 1         |
| Lrrc40           | 0.54502   | 0.429497        | 0           | 1         | 1         |
| AK012506         | 0.228185  | 0.129746        | -0.814513   | 0.408794  | 0.729001  |
| Il7_j7           | 0.145761  | 0.218758        | 0.585735    | 0.476439  | 0.77213   |
| Tpd52_j1         | 1.27912   | 1.21016         | 0           | 1         | 1         |
| XLOC_021248      | 0.212689  | 0.198908        | -0.096644   | 0.854984  | 0.954077  |
| Fabp4            | 0.627066  | 0.156278        | -2.0045     | 0.0054635 | 0.0542882 |
| Zfand1_j8        | 0.0486163 | 0.120255        | 1.30659     | 0.415425  | 1         |
| 1810022K09Rik_j3 | 0.934649  | 0.99094         | 0           | 1         | 1         |
| Armc1_j3         | 1.00222   | 0.885014        | -0.179423   | 0.628636  | 0.855546  |
| Armc1_j4         | 0.102751  | 0 -1.79769e+308 |             | 0.0113    | 1         |
| Armc1_j2         | 0.0270246 | 0.0601684       | 1.15474     | 0.46603   | 1         |
| Pde7a_j1         | 0.271113  | 0.0592515       | -2.19397    | 0.0013738 | 0.0184472 |
| Hps3_j4          | 0.732216  | 0.686392        | 0           | 1         | 1         |
| Gyg_j4           | 0.233118  | 0.329779        | 0           | 1         | 1         |
| Cpb1_j1          | 0.18152   | 0.319481        | 0.815601    | 0.216979  | 0.563119  |
| Agtr1b_j1        | 1.83233   | 1.60217         | -0.193653   | 0.470582  | 0.768381  |
| Fndc3b_j5        | 0.555934  | 0.590011        | 0           | 1         | 1         |
| AK007174_j1      | 0.0178348 | 0.0827599       | 2.21424     | 0.392421  | 1         |
| Mecom_j1         | 0.12597   | 0.0864598       | -0.542973   | 0.529301  | 1         |
| Arpm1            | 0.119368  | 0.127437        | 0.0943746   | 0.876356  | 1         |
| Phc3_j1          | 0.238296  | 0.194553        | 0           | 1         | 1         |
| Zmat3_j1         | 8.31981   | 4.59787         | 0           | 1         | 1         |
| Zmat3_j2         | 0.045644  | 0.0668528       | 0           | 1         | 1         |
| Mrpl47           | 1.42496   | 1.36389         | 0           | 1         | 1         |
| Pex5l_j1         | 1.86466   | 0.961135        | -0.956098   | 2.93E-07  | 1.40E-05  |
| Pex5l_j2         | 1.66798   | 1.21025         | -0.462801   | 0.0088789 | 0.0783943 |
| Dcun1d1_j1       | 4.59949   | 3.46261         | -0.409615   | 0.324641  | 0.667642  |
| Mccc1_j1         | 4.94127   | 6.23686         | 0.335937    | 0.0196099 | 0.13906   |
| Mccc1_j3         | 2.00439   | 2.43171         | 0.278805    | 0.0633033 | 0.298385  |

|                  |             |           |               |           |           |
|------------------|-------------|-----------|---------------|-----------|-----------|
| Qrfpr_j1         | 0.279718    | 0.799041  | 1.5143        | 0.0081321 | 0.0735052 |
| Anxa5_j3         | 3.96184     | 4.38002   | 0             | 1         | 1         |
| AK043581_j2      | 1.34901     | 1.9958    | 0             | 1         | 1         |
| Trpc3_j7         | 11.9232     | 12.2817   | 0             | 1         | 1         |
| Nudt6_j2         | 1.71263     | 2.44878   | 0.515843      | 0.106855  | 0.406092  |
| Nudt6            | 2.12824     | 1.96153   | -0.117685     | 0.669661  | 0.874991  |
| Ankrd50_j3       | 0.73        | 1.00161   | 0             | 1         | 1         |
| AK012035_j2      | 0.295394    | 0.325635  | 0.140615      | 0.798091  | 0.932954  |
| AK012035_j7      | 0           | 0.233643  | 1.79769e+308  | 0.0297313 | 0.184675  |
| Elf2             | 1.00563     | 0.869599  | 0             | 1         | 1         |
| Elf2_j1          | 0.419511    | 0.113986  | 0             | 1         | 1         |
| Ndufc1           | 10.2739     | 12.7546   | 0             | 1         | 1         |
| Maml3_j3         | 0.122648    | 0.19816   | 0             | 1         | 1         |
| Exosc8           | 3.23265     | 3.49509   | 0.112611      | 0.422186  | 0.738253  |
| Tm4sf1_j3        | 5.0143      | 8.33032   | 0.732322      | 0.0004435 | 0.0073634 |
| Clrn1            | 0.624221    | 0.473009  | 0             | 1         | 1         |
| P2ry12_j4        | 1.05073     | 0.868138  | 0             | 1         | 1         |
| Gpr149_j2        | 3.03264     | 1.834     | 0             | 1         | 1         |
| Ssr3_j1          | 0.22685     | 0         | 0             | 1         | 1         |
| Lxn_j2           | 121.656     | 138.651   | 0.188649      | 0.039006  | 0.220297  |
| XLOC_021380      | 0.142901    | 0.0879652 | -0.700006     | 0.649585  | 0.865374  |
| XLOC_021380      | 0.139432    | 0.17726   | 0.346308      | 0.810683  | 0.937953  |
| Ift80            | 0.511713    | 0.527783  | 0             | 1         | 1         |
| snoU90           | 0.64444     | 0.418157  | 0             | 1         | 1         |
| Rpl32-ps         | 1.43586     | 1.64508   | 0.19625       | 0.585222  | 0.833935  |
| 1110032A04Rik_j2 | 0.0934262   | 0         | -1.79769e+308 | 0.0106072 | 1         |
| 1110032A04Rik_j1 | 0           | 0.0487282 | 1.79769e+308  | 0.101094  | 1         |
| Slitrk3_j4       | 1.38591     | 0.706148  | -0.972796     | 3.38E-05  | 0.0008576 |
| Slitrk3_j2       | 0.121465    | 0         | -1.79769e+308 | 4.97E-06  | 1         |
| Slitrk3          | 0.000210788 | 0.107948  | 9.00034       | 0.525001  | 1         |
| Pdcd10_j2        | 0.333108    | 0.308234  | -0.111964     | 0.812029  | 0.938348  |
| Pdcd10_j7        | 0.956576    | 1.12733   | 0.23696       | 0.647763  | 0.86433   |
| Pdcd10_j9        | 9.34481     | 7.6419    | -0.290233     | 0.32603   | 0.669299  |
| Golim4_j1        | 0.0789332   | 0.059592  | -0.405513     | 0.701793  | 1         |
| Rapgef2_j3       | 4.51102     | 3.80314   | 0             | 1         | 1         |
| Fnip2_j3         | 0.0197258   | 0.176533  | 0             | 1         | 1         |
| Gria2_j12        | 1.22929     | 0.831317  | -0.564351     | 0.0604397 | 0.289793  |
| Glrb             | 9.20505     | 5.27041   | 0             | 1         | 1         |
| Gucy1a3_j2       | 0.141572    | 0.0230437 | -2.61909      | 0.0398623 | 0.223368  |
| Npy2r_j3         | 0.437162    | 0.39599   | 0             | 1         | 1         |
| D930015E06Rik_j1 | 0.604471    | 0.854455  | 0.499331      | 0.0751095 | 0.33088   |
| Mnd1_j3          | 0.339682    | 0.19745   | -0.782696     | 0.47142   | 0.768965  |
| Trim2_j1         | 11.534      | 8.84603   | 0             | 1         | 1         |
| Fhdc1            | 1.32666     | 1.2172    | 0             | 1         | 1         |
| Arfip1_j1        | 1.62494     | 2.45705   | 0             | 1         | 1         |
| Arfip1_j3        | 0.806417    | 0.367566  | 0             | 1         | 1         |
| Arfip1_j2        | 6.43113     | 5.42552   | 0             | 1         | 1         |

|                  |           |           |              |           |           |
|------------------|-----------|-----------|--------------|-----------|-----------|
| Rps3a_j2         | 6.20622   | 6.01849   | -0.0443119   | 0.746028  | 0.911565  |
| Rps3a_j9         | 0         | 0.846246  | 1.79769e+308 | 1.38E-07  | 7.15E-06  |
| Fclrs_j1         | 1.05452   | 4.35128   | 2.04485      | 0         | 0         |
| Pear1_j1         | 0.0723061 | 0.112477  | 0            | 1         | 1         |
| Ntrk1_j2         | 24.2811   | 35.7424   | 0            | 1         | 1         |
| Bcan_j5          | 10.3218   | 7.5991    | 0            | 1         | 1         |
| Hapln2_j1        | 0.114074  | 0.0654921 | 0            | 1         | 1         |
| AK008852         | 0.526924  | 0.665655  | 0            | 1         | 1         |
| 1700021C14Rik_j1 | 0.71897   | 0.744459  | 0.0502621    | 0.948152  | 0.984981  |
| 1700021C14Rik    | 1.40697   | 1.28619   | -0.129481    | 0.715342  | 0.897128  |
| Tmem79           | 4.82534   | 2.38271   | 0            | 1         | 1         |
| Sema4a           | 0.354709  | 0.374445  | 0            | 1         | 1         |
| Robld3_j2        | 38.2749   | 37.4296   | -0.0322207   | 0.862605  | 0.956533  |
| Syt11            | 122.697   | 121.09    | 0            | 1         | 1         |
| Dap3_j1          | 0         | 0.224775  | 1.79769e+308 | 0.0215549 | 0.148387  |
| Rusc1_j3         | 2.71719   | 0         | 0            | 1         | 1         |
| Fdps_j2          | 41.8602   | 52.0537   | 0.314421     | 0.0073515 | 0.0683123 |
| Hcn3_j1          | 0.651853  | 0.71772   | 0            | 1         | 1         |
| Hcn3_j3          | 2.80077   | 3.81961   | 0            | 1         | 1         |
| Mtx1_j2          | 6.82233   | 7.64869   | 0            | 1         | 1         |
| Adam15_j1        | 0.135797  | 0.0655085 | 0            | 1         | 1         |
| Atp8b2_j5        | 7.03301   | 4.67803   | 0            | 1         | 1         |
| Ubp2l_j5         | 2.27649   | 2.17516   | 0            | 1         | 1         |
| Ubp2l            | 4.72495   | 4.39993   | 0            | 1         | 1         |
| Ints3_j4         | 1.84566   | 1.69495   | 0            | 1         | 1         |
| Ints3            | 7.95686   | 8.57369   | 0            | 1         | 1         |
| Npr1_j8          | 0.714041  | 0.639392  | -0.159306    | 0.744573  | 0.910838  |
| 2500003M10Rik_j2 | 6.62606   | 7.66782   | 0.210665     | 0.27765   | 0.626539  |
| 2500003M10Rik_j3 | 0         | 0.0633675 | 1.79769e+308 | 0.0365933 | 1         |
| S100a1           | 4.36851   | 5.11321   | 0.227087     | 0.0877298 | 0.362594  |
| Prr9             | 0.0298244 | 0.209757  | 2.81416      | 0.0004779 | 0.0078385 |
| Oaz3_j1          | 1.01964   | 1.03942   | 0            | 1         | 1         |
| Tuft1_j1         | 0.121988  | 0.0758486 | 0            | 1         | 1         |
| Tuft1_j2         | 0.514402  | 0.656329  | 0            | 1         | 1         |
| Zfp687_j7        | 0.184118  | 0.250251  | 0.442745     | 0.244974  | 0.592383  |
| Psm4_j4          | 57.1683   | 63.2178   | 0            | 1         | 1         |
| Pip5k1a_j2       | 0.0961221 | 0.0931674 | 0            | 1         | 1         |
| Pip5k1a_j4       | 1.12936   | 0.718445  | 0            | 1         | 1         |
| Mllt11_j1        | 0.525059  | 0.728665  | 0            | 1         | 1         |
| Prune_j2         | 8.11232   | 7.55252   | 0            | 1         | 1         |
| Anxa9_j2         | 5.21893   | 5.7649    | 0            | 1         | 1         |
| Setdb1_j3        | 6.56439   | 9.21331   | 0            | 1         | 1         |
| Setdb1           | 0.0543039 | 0.0345712 | 0            | 1         | 1         |
| Tars2_j6         | 3.89303   | 4.88568   | 0.327666     | 0.0110634 | 0.092346  |
| Gm129_j3         | 0.108552  | 0.17605   | 0.697595     | 0.605712  | 0.844635  |
| Vps45_j2         | 0.625702  | 0.77571   | 0.310042     | 0.740065  | 0.908917  |
| Polr3c_j1        | 0.302236  | 0.358874  | 0            | 1         | 1         |

|                  |             |            |               |           |          |
|------------------|-------------|------------|---------------|-----------|----------|
| Bcl9_j8          | 0.248824    | 0.909131   | 0             | 1         | 1        |
| Pde4dip_j1       | 0           | 0.672209   | 0             | 1         | 1        |
| Pde4dip_j2       | 3.74979     | 3.27213    | 0             | 1         | 1        |
| Pde4dip          | 1.10239     | 1.32565    | 0             | 1         | 1        |
| Phgdh_j2         | 1.61168     | 1.48366    | 0             | 1         | 1        |
| Phgdh_j4         | 1.18208     | 1.16994    | 0             | 1         | 1        |
| Atp1a1_j4        | 157.509     | 126.264    | 0             | 1         | 1        |
| 2410057H14Rik    | 0.10551     | 0.178196   | 0             | 1         | 1        |
| 2410057H14Rik_j1 | 0.202191    | 0.139609   | 0             | 1         | 1        |
| Lrig2_j5         | 0.436344    | 0.272061   | -0.681535     | 0.0501294 | 0.258726 |
| Fam19a3_j1       | 0.103128    | 0.0486389  | 0             | 1         | 1        |
| Mov10_j3         | 0.13741     | 0          | 0             | 1         | 1        |
| Mov10            | 0.164353    | 0.00325734 | 0             | 1         | 1        |
| Capza1_j3        | 31.0672     | 33.6604    | 0.115662      | 0.212861  | 0.557744 |
| AK018929_j2      | 0.0929863   | 0          | -1.79769e+308 | 0.100164  | 1        |
| AK018929_j3      | 0.170929    | 0.141516   | -0.272427     | 0.782324  | 0.926474 |
| Rap1a_j1         | 5.51222     | 4.93314    | -0.160128     | 0.208312  | 0.552336 |
| Rap1a_j6         | 0.761779    | 0.732745   | -0.0560615    | 0.931322  | 0.979067 |
| Atp5f1_j4        | 25.5914     | 26.4809    | 0             | 1         | 1        |
| Kcnc4            | 2.72239     | 2.04199    | -0.414898     | 0.0275158 | 0.175523 |
| Kcnc4_j1         | 2.19481     | 2.26683    | 0.0465853     | 0.802642  | 0.934384 |
| Fam40a_j5        | 1.01463     | 0.834744   | -0.281547     | 0.516519  | 0.795093 |
| Csf1_j3          | 1.80062     | 8.79539    | 0             | 1         | 1        |
| Gstm1            | 0.789009    | 0.618031   | -0.352361     | 0.473531  | 0.770096 |
| Ampd2_j3         | 0.396489    | 0.289536   | 0             | 1         | 1        |
| Gnai3_j5         | 0.0863251   | 0.0356589  | 0             | 1         | 1        |
| Gpr61            | 3.24229     | 3.03738    | 0             | 1         | 1        |
| Cyb561d1_j1      | 0.0515729   | 0.0191986  | 0             | 1         | 1        |
| Atxn7l2_j7       | 0.563214    | 1.07659    | 0             | 1         | 1        |
| Celsr2_j5        | 2.8886      | 2.92375    | 0.0174479     | 0.893786  | 0.966325 |
| 5330417C22Rik_j5 | 0.0815172   | 0          | -1.79769e+308 | 0.0827334 | 1        |
| Stxbp3a_j3       | 3.17711     | 2.89464    | -0.134329     | 0.634211  | 0.858133 |
| Prpf38b_j4       | 0.975463    | 2.58925    | 0             | 1         | 1        |
| Ntng1_j7         | 0.000348793 | 0.109439   | 0             | 1         | 1        |
| Rnpc3_j8         | 2.0324      | 2.03693    | 0             | 1         | 1        |
| A930005H10Rik    | 2.59196     | 2.41371    | -0.10279      | 0.680383  | 0.879921 |
| Cdc14a_j5        | 0.145373    | 0.263537   | 0.858242      | 0.414668  | 0.732858 |
| Rtcd1_j1         | 37.3164     | 30.5952    | -0.286505     | 0.047542  | 0.250343 |
| Slc35a3_j6       | 0.873107    | 0.741264   | -0.236172     | 0.688082  | 0.884102 |
| Slc35a3_j7       | 0.242016    | 0.1134     | -1.09369      | 0.346     | 0.685212 |
| Palmd_j5         | 5.76638     | 5.25852    | 0             | 1         | 1        |
| XLOC_021619      | 0.167964    | 2.73E-05   | -12.585       | 0.981224  | 0.994152 |
| Abcd3_j4         | 15.1732     | 14.4283    | 0             | 1         | 1        |
| Usp53_j5         | 0.779607    | 0.927394   | 0.250435      | 0.314183  | 0.658401 |
| Usp53            | 0.207525    | 0.420226   | 1.01788       | 0.0655323 | 0.305143 |
| Mettl14_j1       | 1.69623     | 0.93974    | -0.851997     | 0.0158514 | 0.119478 |
| Ndst3_j3         | 1.09296     | 1.23061    | 0             | 1         | 1        |

|               |           |                 |             |           |           |
|---------------|-----------|-----------------|-------------|-----------|-----------|
| Ank2_j6       | 0.093145  | 0.0912443       | 0           | 1         | 1         |
| Ank2_j7       | 0.116516  | 0.0179585       | 0           | 1         | 1         |
| Larp7         | 6.82151   | 7.2181          | 0.0815288   | 0.540909  | 0.809097  |
| Alpk1         | 0.546215  | 0.393159        | 0           | 1         | 1         |
| Alpk1_j7      | 0.151564  | 0.194612        | 0           | 1         | 1         |
| Alpk1_j12     | 0.075621  | 0.108389        | 0           | 1         | 1         |
| 5730508B09Rik | 1.15289   | 1.34218         | 0.219331    | 0.456337  | 0.759792  |
| 5730508B09Rik | 2.15628   | 1.52372         | -0.500943   | 0.0434114 | 0.236471  |
| Rpl34         | 1.14626   | 1.12543         | -0.0264606  | 0.928822  | 0.978142  |
| Gstcd_j1      | 0.0777455 | 0.0789711       | 0           | 1         | 1         |
| Gstcd_j2      | 0.107531  | 0.0766822       | 0           | 1         | 1         |
| Bank1_j1      | 0.486884  | 0.623668        | 0.357201    | 0.351156  | 0.688314  |
| Metap1_j1     | 0.514065  | 0.591662        | 0           | 1         | 1         |
| Metap1_j2     | 6.67119   | 8.56442         | 0           | 1         | 1         |
| Bmpr1b_j9     | 0.0924889 | 0.312937        | 1.75852     | 0.0046427 | 0.0479821 |
| Pdlim5_j5     | 0.513679  | 0.913355        | 0           | 1         | 1         |
| Pdlim5_j6     | 2.36427   | 2.64749         | 0           | 1         | 1         |
| Hs2st1_j1     | 0.627869  | 0.757345        | 0.270487    | 0.319575  | 0.662889  |
| Sh3glb1_j5    | 5.396     | 7.14551         | 0           | 1         | 1         |
| Spata1_j1     | 0.099143  | 0.122555        | 0.305846    | 0.763504  | 1         |
| Rpf1_j2       | 5.06537   | 5.05678         | -0.00244741 | 0.989702  | 0.996781  |
| Gipc2_j3      | 0.65815   | 0.70521         | 0.0996374   | 1         | 1         |
| Nexn_j2       | 0.474703  | 0.428096        | 0           | 1         | 1         |
| Fam73a_j1     | 0.0577331 | 0.14383         | 0           | 1         | 1         |
| Ak5_j2        | 9.27813   | 5.85839         | 0           | 1         | 1         |
| St6galnac3_j4 | 0.0603171 | 0.225447        | 1.90215     | 0.0001051 | 0.0022488 |
| Tnni3k_j1     | 0.14058   | 0.0333447       | -2.07587    | 0.311596  | 0.656252  |
| Srsf11_j1     | 8.92538   | 9.03753         | 0           | 1         | 1         |
| Lrrc7_j2      | 0.0835096 | 0.100959        | 0.273753    | 0.84215   | 1         |
| Zbtb10_j1     | 0.0795419 | 8.82E-05        | -9.81617    | 0.808082  | 1         |
| XLOC_020752   | 0.175623  | 0.120512        | -0.543308   | 0.331798  | 0.67329   |
| Raly1_j2      | 1.47132   | 1.25937         | -0.224416   | 0.476468  | 0.772134  |
| Raly1_j3      | 0.448062  | 0.0388865       | -3.52636    | 0.0182453 | 0.132224  |
| Raly1_j9      | 0.140152  | 0 -1.79769e+308 | 0.0666003   | 0.0666003 | 0.308319  |
| Car13_j3      | 0.624508  | 0.31069         | 0           | 1         | 1         |
| XLOC_020763   | 0.106815  | 0.0527528       | -1.01779    | 0.417846  | 1         |
| XLOC_020764   | 0.266991  | 0.0405541       | -2.71887    | 0.227079  | 0.574277  |
| Cp            | 0.567461  | 0.812324        | 0           | 1         | 1         |
| Hltf_j1       | 0.531859  | 0.285889        | -0.895586   | 0.0227047 | 0.153825  |
| Hltf          | 0.124343  | 0.525914        | 2.0805      | 4.87E-06  | 0.0001652 |
| XLOC_020778   | 0.0873619 | 0.0853251       | -0.0340345  | 0.969776  | 1         |
| XLOC_020778   | 0.285891  | 0 -1.79769e+308 | 0.0221982   | 0.0221982 | 0.151467  |
| Tbl1xr1       | 1.5743    | 1.58292         | 0           | 1         | 1         |
| Tbl1xr1_j3    | 0.174781  | 0               | 0           | 1         | 1         |
| Pld1_j2       | 0.212188  | 0.0844962       | -1.32839    | 0.0435801 | 0.237208  |
| Tnik_j3       | 0.396493  | 0.591208        | 0           | 1         | 1         |
| XLOC_020790   | 0.0985175 | 0.0748206       | -0.396944   | 0.594335  | 1         |

|                   |           |            |               |           |           |
|-------------------|-----------|------------|---------------|-----------|-----------|
| Egfem1_j4         | 0.151062  | 0.125273   | -0.270068     | 0.789025  | 0.929615  |
| Egfem1_j5         | 0.849032  | 0          | -1.79769e+308 | 5.48E-07  | 2.45E-05  |
| Egfem1_j10        | 0.534217  | 0.397056   | -0.428082     | 0.328694  | 0.671184  |
| Gpr160_j1         | 0.158678  | 0.298361   | 0.910957      | 0.212298  | 0.557296  |
| Gpr160_j2         | 0.241884  | 0.0970327  | -1.31777      | 0.16892   | 0.505733  |
| Skil_j3           | 0.452819  | 0.350782   | -0.36836      | 0.24343   | 0.590641  |
| XLOC_020799       | 0.211863  | 0.204456   | -0.0513423    | 0.933094  | 0.979673  |
| XLOC_020800       | 0.0536468 | 0.00873397 | 0             | 1         | 1         |
| XLOC_020802       | 0.135339  | 0.149384   | 0.142451      | 0.860708  | 1         |
| Actl6a_j1         | 2.10633   | 2.39658    | 0             | 1         | 1         |
| Usp13_j6          | 0.184684  | 0.0336993  | 0             | 1         | 1         |
| XLOC_020809       | 0.126447  | 0.101324   | -0.319564     | 0.693057  | 1         |
| Sox2ot_j9         | 0.328266  | 0.0642756  | -2.35252      | 0.0166089 | 0.123733  |
| Sox2ot_j10        | 0.982477  | 1.48309    | 0.594112      | 0.0230388 | 0.155364  |
| Atp11b_j7         | 0.777455  | 0.635952   | -0.289841     | 0.297985  | 0.64461   |
| 4932438A13Rik_j2  | 0.67088   | 0.515612   | -0.379767     | 0.0435871 | 0.237208  |
| 4932438A13Rik_j11 | 2.06305   | 2.11406    | 0.0352396     | 0.822872  | 0.942847  |
| Bbs12             | 0.762013  | 0.0286305  | -4.73419      | 0.0012306 | 0.0168867 |
| Fat4              | 0.140056  | 0.0708265  | -0.983642     | 0.141818  | 0.468486  |
| Intu_j2           | 0.223333  | 0.105848   | -1.0772       | 0.0730991 | 0.325521  |
| Intu              | 0.15367   | 0.152032   | -0.0154624    | 0.973521  | 0.99239   |
| Hspa4l_j2         | 13.7388   | 12.9578    | 0             | 1         | 1         |
| Larp1b_j2         | 0.50817   | 0.23976    | -1.08372      | 0.0254254 | 0.166281  |
| Phf17             | 0.175425  | 0.117371   | 0             | 1         | 1         |
| Phf17_j4          | 0.2084    | 0          | 0             | 1         | 1         |
| Phf17_j6          | 0.155609  | 0.115951   | 0             | 1         | 1         |
| Naa15_j3          | 1.15001   | 2.055      | 0             | 1         | 1         |
| Mgst2             | 0.186456  | 0.0466725  | -1.99819      | 0.420093  | 0.736557  |
| Trpc4_j3          | 0.0544993 | 0.0205784  | -1.40511      | 0.280694  | 1         |
| Fam48a_j4         | 1.49453   | 0.122092   | -3.61366      | 5.96E-07  | 2.64E-05  |
| Mbnl1             | 4.50432   | 4.18791    | -0.10508      | 0.568984  | 0.825725  |
| Mbnl1_j1          | 0.080723  | 0.0638044  | -0.339323     | 0.822345  | 1         |
| Mbnl1_j9          | 2.49612   | 1.66028    | -0.588259     | 0.0164575 | 0.12283   |
| Mme_j4            | 0.517725  | 0.497303   | 0             | 1         | 1         |
| Kcnab1_j5         | 0.191132  | 0.150998   | -0.340035     | 0.792379  | 0.930832  |
| Lekr1_j3          | 0.238455  | 0.160641   | -0.569876     | 0.302637  | 0.648636  |
| Mlf1_j1           | 0.921447  | 1.19712    | 0.377591      | 0.524202  | 0.799783  |
| Fstl5_j3          | 3.26685   | 3.38738    | 0             | 1         | 1         |
| Fam198b_j3        | 0.92242   | 1.21432    | 0             | 1         | 1         |
| Pdgfc             | 0.126745  | 0.165335   | 0.383455      | 0.557934  | 0.819817  |
| Mtap9_j1          | 1.08133   | 0.620839   | 0             | 1         | 1         |
| Sfrp2_j1          | 0.0626527 | 0.0608306  | -0.0425802    | 0.975156  | 1         |
| XLOC_020907       | 0.0614542 | 0          | -1.79769e+308 | 0.0804657 | 1         |
| Tmem154_j1        | 0.389668  | 0.257847   | -0.59573      | 0.250734  | 0.598486  |
| Lrba_j3           | 0.283953  | 0.166729   | -0.768145     | 0.012312  | 0.100025  |
| Etv3_j2           | 1.46574   | 2.53173    | 0             | 1         | 1         |
| Arhgef11_j6       | 0.785162  | 0.602776   | 0             | 1         | 1         |

|                  |           |                 |            |           |           |
|------------------|-----------|-----------------|------------|-----------|-----------|
| Arhgef11_j10     | 0.325208  | 0.178313        | 0          | 1         | 1         |
| Hdgf_j1          | 18.1342   | 17.4395         | 0          | 1         | 1         |
| Hdgf_j2          | 10.5767   | 16.0066         | 0          | 1         | 1         |
| Mrpl24           | 4.54578   | 4.50064         | 0          | 1         | 1         |
| Gpatch4_j2       | 5.4606    | 6.6271          | 0          | 1         | 1         |
| Smg5_j2          | 1.31347   | 1.45053         | 0          | 1         | 1         |
| Paqr6_j4         | 0.441191  | 0.244589        | 0          | 1         | 1         |
| Paqr6_j6         | 0.93765   | 1.70935         | 0          | 1         | 1         |
| Ssr2             | 3.27856   | 3.71383         | 0.179843   | 0.583534  | 0.833132  |
| Arhgef2_j6       | 0.100527  | 0               | 0          | 1         | 1         |
| Rit1_j1          | 21.6201   | 23.3887         | 0          | 1         | 1         |
| Gon4l            | 1.76274   | 2.0536          | 0          | 1         | 1         |
| Ash1l_j1         | 1.22619   | 1.3143          | 0          | 1         | 1         |
| Clk2_j1          | 6.36879   | 6.81917         | 0          | 1         | 1         |
| Clk2_j6          | 7.81706   | 7.22743         | 0          | 1         | 1         |
| Thbs3_j4         | 0.0924754 | 0               | 0          | 1         | 1         |
| Thbs3_j10        | 0.223244  | 0.0807234       | 0          | 1         | 1         |
| Thbs3_j11        | 0.929427  | 1.17042         | 0          | 1         | 1         |
| Shc1_j5          | 16.3635   | 17.9162         | 0.130777   | 0.147365  | 0.476     |
| Pygo2_j1         | 12.9966   | 12.502          | -0.0559797 | 0.652917  | 0.867181  |
| Pbxip1_j1        | 0.0571619 | 0 -1.79769e+308 | 0.0048225  | 0.0048225 | 1         |
| Adar_j2          | 1.35121   | 2.16089         | 0.677369   | 3.03E-05  | 0.0007803 |
| 4933434E20Rik_j1 | 0.477397  | 0.420564        | 0          | 1         | 1         |
| Tpm3_j2          | 0.888858  | 0 -1.79769e+308 | 3.89E-16   | 3.89E-16  | 9.25E-14  |
| Tpm3_j4          | 16.3623   | 23.2321         | 0.505747   | 1.52E-05  | 0.0004446 |
| Gatad2b_j3       | 0.51703   | 0.106309        | -2.28198   | 3.48E-06  | 0.0001234 |
| S100a13_j3       | 0.479749  | 0.685507        | 0.51489    | 0.62254   | 0.852369  |
| S100a6_j3        | 185.484   | 89.1725         | -1.05662   | 0         | 0         |
| S100a11_j1       | 0.139482  | 0.349172        | 1.32385    | 0.385549  | 0.714167  |
| Rorc_j2          | 0.291829  | 0.15487         | -0.914068  | 0.373459  | 0.706317  |
| Celf3_j3         | 0.373178  | 0               | 0          | 1         | 1         |
| Celf3_j8         | 0.0832229 | 0               | 0          | 1         | 1         |
| Selenbp1_j1      | 0.079873  | 0               | 0          | 1         | 1         |
| Tmod4_j1         | 0.090718  | 0.0179465       | -2.33769   | 0.252538  | 1         |
| Lysmd1_j1        | 0.153226  | 0.151549        | -0.0158709 | 0.969105  | 0.991369  |
| Sema6c_j5        | 0.467152  | 0.000489856     | 0          | 1         | 1         |
| AK020406_j1      | 0.342796  | 0.527649        | 0          | 1         | 1         |
| Fam63a           | 0.256123  | 0.145827        | 0          | 1         | 1         |
| Lass2_j4         | 27.4913   | 31.4657         | 0          | 1         | 1         |
| Arnt_j2          | 1.20279   | 0.564566        | 0          | 1         | 1         |
| Arnt_j4          | 1.07556   | 1.46975         | 0          | 1         | 1         |
| Aph1a_j1         | 1.52906   | 1.69233         | 0.14637    | 0.513981  | 0.793015  |
| Aph1a_j2         | 1.2179    | 1.37081         | 0.170634   | 0.477099  | 0.772601  |
| Otud7b_j2        | 1.60256   | 1.59176         | 0          | 1         | 1         |
| Otud7b_j1        | 0.0828714 | 0.0599837       | 0          | 1         | 1         |
| Otud7b_j7        | 0.211659  | 0               | 0          | 1         | 1         |
| Sf3b4            | 2.40874   | 2.2781          | 0          | 1         | 1         |



|                   |           |                 |            |           |           |
|-------------------|-----------|-----------------|------------|-----------|-----------|
| Ankrd34a          | 2.06243   | 1.34366         | -0.618178  | 0.0016514 | 0.0214013 |
| Rbm8a_j2          | 0.324394  | 0.394223        | 0          | 1         | 1         |
| Pias3             | 0.7723    | 0.889624        | 0.204035   | 0.596994  | 0.83999   |
| XLOC_021036       | 0.239377  | 0.181126        | 0          | 1         | 1         |
| Pdzk1_j1          | 2.60522   | 2.64751         | 0.0232341  | 0.895306  | 0.966918  |
| Fmo5_j1           | 0.0573638 | 0 -1.79769e+308 |            | 0.0035019 | 1         |
| Notch2_j2         | 0.410848  | 0.441462        | 0          | 1         | 1         |
| Zfp697            | 0.251912  | 0.30134         | 0          | 1         | 1         |
| Zfp697_j1         | 0.0712402 | 0.084857        | 0.252343   | 0.855494  | 1         |
| Tbx15_j1          | 0.135662  | 0.0910498       | -0.575286  | 0.470745  | 1         |
| Igsf3             | 2.00201   | 0.78576         | 0          | 1         | 1         |
| Igsf3_j2          | 0.212418  | 0.271244        | 0          | 1         | 1         |
| XLOC_021053       | 0.217003  | 0.139211        | -0.640439  | 0.170449  | 0.507472  |
| Nhlh2_j5          | 0.390191  | 0.200961        | -0.957265  | 0.152224  | 0.483673  |
| Tspan2_j1         | 14.7948   | 12.9002         | 0          | 1         | 1         |
| Csde1_j4          | 0.112463  | 0               | 0          | 1         | 1         |
| Syt6_j2           | 0.829067  | 1.00315         | 0          | 1         | 1         |
| Phtf1_j6          | 0.526615  | 0.43445         | 0          | 1         | 1         |
| Phtf1_j11         | 0.0933991 | 0.0284551       | 0          | 1         | 1         |
| Ppm1j_j2          | 0.117266  | 0               | 0          | 1         | 1         |
| Ppm1j_j7          | 2.79713   | 4.10885         | 0          | 1         | 1         |
| Rhoc_j2           | 32.1826   | 56.1001         | 0          | 1         | 1         |
| XLOC_021076       | 0.117349  | 0.364034        | 1.63326    | 0.0596255 | 0.287307  |
| XLOC_021076       | 0.062309  | 0.0015323       | -5.34567   | 0.234123  | 1         |
| XLOC_021078       | 0.168241  | 0.0968068       | -0.79735   | 0.175129  | 0.513373  |
| Chia_j3           | 0.304826  | 0.235741        | -0.370779  | 0.493843  | 0.782252  |
| Kcna2_j3          | 6.76867   | 1.07548         | 0          | 1         | 1         |
| Psm5_j3           | 0.282727  | 0.170451        | -0.730051  | 0.122852  | 0.436393  |
| Psrc1             | 0.223001  | 2.03E-05        | -13.4261   | 0.985448  | 0.995689  |
| Wdr47_j3          | 0         | 0.167437        | 0          | 1         | 1         |
| Wdr47_j6          | 0.398308  | 0.278581        | 0          | 1         | 1         |
| Clcc1             | 0.902433  | 0.868102        | -0.0559552 | 0.883944  | 0.963268  |
| Col11a1_j1        | 0.906695  | 1.147           | 0          | 1         | 1         |
| Col11a1_j7        | 2.31928   | 2.32719         | 0          | 1         | 1         |
| Extl2_j1          | 0.513095  | 0.0471003       | 0          | 1         | 1         |
| XLOC_021114       | 0.217883  | 0.179879        | 0          | 1         | 1         |
| XLOC_021122       | 0.346562  | 0.256528        | 0          | 1         | 1         |
| XLOC_021122       | 1.26591   | 0.982468        | 0          | 1         | 1         |
| F3_j1             | 0.146955  | 0 -1.79769e+308 |            | 0.007761  | 0.071037  |
| Arhgap29          | 0.430263  | 0.689354        | 0          | 1         | 1         |
| Arhgap29_j7       | 0.755343  | 0.668061        | 0          | 1         | 1         |
| Gclm_j1           | 28.3458   | 27.4967         | -0.0438788 | 0.753399  | 0.914745  |
| Sec24d_j1         | 0.818459  | 0.789623        | 0          | 1         | 1         |
| 4930422G04Rik_j4  | 0.116813  | 0.0633476       | -0.882839  | 0.524871  | 1         |
| 4930422G04Rik_j11 | 0.0819791 | 0 -1.79769e+308 |            | 0.0026393 | 1         |
| 4930422G04Rik_j10 | 0.127241  | 1.41E-05        | -13.1355   | 0.978486  | 1         |
| Tifa_j3           | 12.099    | 22.0055         | 0.862984   | 3.60E-14  | 6.44E-12  |

|                  |           |                       |             |           |           |
|------------------|-----------|-----------------------|-------------|-----------|-----------|
| XLOC_021145      | 0.143251  | 0.107525              | -0.413871   | 0.641113  | 0.861592  |
| Elovl6_j1        | 5.94564   | 5.82549               | 0           | 1         | 1         |
| Col25a1_j1       | 0.293836  | 0.0271063             | -3.43831    | 0.0428544 | 0.234451  |
| Papss1_j1        | 12.2741   | 14.0892               | 0           | 1         | 1         |
| XLOC_021160      | 0.226697  | 0.150405              | -0.591917   | 0.505427  | 0.78827   |
| XLOC_021160      | 0.129405  | 0.101977              | -0.343644   | 0.656976  | 1         |
| AK050464_j1      | 0.461157  | 0.435518              | -0.0825252  | 0.836978  | 0.947826  |
| AK050464         | 0.173304  | 0.0276707             | -2.64688    | 0.0666953 | 0.308554  |
| BC065149_j2      | 0.262411  | 0.117125              | -1.16378    | 0.372252  | 0.705185  |
| Cxxc4_j2         | 0.19047   | 0 -1.79769e+308       |             | 4.18E-06  | 0.0001447 |
| Cenpe_j1         | 0.0791556 | 0.0423635             | -0.901872   | 0.572388  | 1         |
| Nhedc2_j4        | 0.172065  | 0 -1.79769e+308       |             | 0.0003352 | 0.005853  |
| Slc39a8_j1       | 0.166693  | 0 -1.79769e+308       |             | 5.41E-05  | 0.0012764 |
| Ppp3ca_j3        | 9.49188   | 11.0968               | 0           | 1         | 1         |
| XLOC_021173      | 0.391563  | 0.00362958            | -6.7533     | 0.465956  | 0.765799  |
| Mapksp1_j2       | 0.29562   | 0.214339              | -0.463849   | 0.510911  | 0.79135   |
| Mapksp1_j9       | 0.244529  | 0.262815              | 0.104044    | 0.849308  | 0.952228  |
| Adh7_j2          | 0.0710141 | 0 -1.79769e+308       |             | 0.0175787 | 1         |
| Adh1_j1          | 0.447965  | 0.0126545             | -5.14566    | 0.0788241 | 0.340456  |
| Eif4e_j1         | 9.12704   | 8.63345               | 0           | 1         | 1         |
| Eif4e_j5         | 3.39673   | 2.99647               | 0           | 1         | 1         |
| Tspan5           | 0.435359  | 0.183868              | 0           | 1         | 1         |
| Tspan5_j2        | 0.275161  | 0.0973822             | 0           | 1         | 1         |
| Gbp5             | 0.321603  | 0.165268              | -0.960478   | 0.0960436 | 0.382706  |
| Gbp3             | 1.44064   | 1.14084               | 0           | 1         | 1         |
| Gbp1_j2          | 2.90742   | 1.76627               | -0.719029   | 0.023101  | 0.155633  |
| XLOC_021191      | 0.136535  | 0.0886436             | -0.623183   | 0.649451  | 1         |
| Sep15_j1         | 64.0624   | 71.6878               | 0           | 1         | 1         |
| Odf2l_j4         | 2.13366   | 1.92982               | -0.144866   | 0.513135  | 0.792387  |
| Odf2l_j9         | 0.0571577 | 0 -1.79769e+308       |             | 0.0400761 | 1         |
| Odf2l_j10        | 0.0826134 | 0 -1.79769e+308       |             | 0.0156522 | 1         |
| Col24a1_j2       | 1.61156   | 1.69133               | 0           | 1         | 1         |
| Col24a1_j7       | 0.143365  | 0.534366              | 0           | 1         | 1         |
| Col24a1_j10      | 0.882178  | 1.79668               | 0           | 1         | 1         |
| Mcoln2_j1        | 0.11847   | 0.108644              | -0.124917   | 0.905193  | 1         |
| Mcoln2_j2        | 0.0627554 | 0.0623932             | -0.00834955 | 0.995244  | 1         |
| Mcoln2_j3        | 0.109101  | 0.0979519             | -0.155517   | 0.890129  | 1         |
| Lpar3_j8         | 13.2529   | 12.3802               | -0.0982664  | 0.489996  | 0.779734  |
| Ctbs_j3          | 0         | 0.543439 1.79769e+308 |             | 5.57E-05  | 0.0013072 |
| Elt1             | 0.4376    | 0.666404              | 0           | 1         | 1         |
| Fubp1_j7         | 0.104187  | 0.0212781             | 0           | 1         | 1         |
| Usp33            | 11.125    | 11.7734               | 0           | 1         | 1         |
| XLOC_021219      | 0.274617  | 0.18773               | -0.548756   | 0.12545   | 0.441203  |
| XLOC_021220      | 0.0977562 | 0.0827651             | -0.240166   | 0.79936   | 1         |
| Cryz_j1          | 1.44114   | 1.43703               | -0.00411734 | 0.989693  | 0.996781  |
| 4922501L14Rik_j3 | 0.469208  | 0.129028              | 0           | 1         | 1         |
| Lrriq3           | 0.328771  | 0.116574              | -1.49583    | 0.0842167 | 0.354146  |

|                  |           |                       |            |           |           |
|------------------|-----------|-----------------------|------------|-----------|-----------|
| Lrriq3_j3        | 0.101235  | 2.12E-05              | -12.2236   | 0.988516  | 1         |
| Ptger3_j1        | 4.69848   | 5.21392               | 0.150174   | 0.357209  | 0.693069  |
| XLOC_021232      | 0.503362  | 0.514397              | 0.0312837  | 0.923109  | 0.976043  |
| Pxmp3_j1         | 0.897271  | 0.559812              | 0          | 1         | 1         |
| Il7_j3           | 0.0738343 | 0 -1.79769e+308       | 0.0182527  |           | 1         |
| Hey1_j3          | 0.0710162 | 0.103657              | 0          | 1         | 1         |
| Tpd52_j6         | 7.39675   | 1.20358               | 0          | 1         | 1         |
| Tpd52_j7         | 14.4044   | 25.8729               | 0          | 1         | 1         |
| Impa1_j1         | 36.2397   | 32.1245               | -0.173899  | 0.0694238 | 0.315947  |
| Snx16            | 2.12486   | 2.10686               | 0          | 1         | 1         |
| 1810022K09Rik_j1 | 0.204309  | 0.138088              | 0          | 1         | 1         |
| 1810022K09Rik_j2 | 0.190935  | 0.194526              | 0          | 1         | 1         |
| Car1             | 0.798382  | 5.55396               | 2.79836    | 0         | 0         |
| XLOC_021260      | 0.208685  | 0.0811441             | -1.36277   | 0.241349  | 0.588455  |
| Crh_j1           | 0.234409  | 0.126492              | -0.889977  | 0.301679  | 0.648     |
| Cpb1_j3          | 2.03799   | 1.7604                | -0.211248  | 0.425098  | 0.740393  |
| Cpb1_j4          | 1.45313   | 0.266258              | -2.44827   | 4.49E-06  | 0.0001533 |
| Naaladl2_j1      | 0.318339  | 0.0592746             | -2.42508   | 0.0117048 | 0.0962802 |
| Nlgn1_j4         | 0.350871  | 0.285394              | -0.297986  | 0.680097  | 0.879617  |
| Nlgn1_j5         | 0.0734184 | 0 -1.79769e+308       | 0.0143123  |           | 1         |
| Ect2_j1          | 0.384754  | 3.11E-05              | -13.5934   | 0.974951  | 0.992819  |
| Ect2_j2          | 0.168855  | 0.130542              | -0.371268  | 0.581388  | 0.8323    |
| AK007174_j5      | 0         | 0.095789 1.79769e+308 | 0.109209   |           | 1         |
| AK007174_j4      | 0.191605  | 0.0390203             | -2.29584   | 0.241595  | 0.588692  |
| AK007174_j6      | 0.0708507 | 0.0410426             | -0.787658  | 0.701281  | 1         |
| AK007174_j7      | 0.173096  | 0.0998168             | -0.794215  | 0.527815  | 0.801757  |
| Gm6505           | 1.83802   | 1.94017               | 0.0780326  | 0.718266  | 0.898598  |
| Mecom_j2         | 0.195237  | 0.245959              | 0.33319    | 0.5888    | 0.835785  |
| Mecom_j7         | 0.145023  | 0.0993169             | -0.546166  | 0.43302   | 0.744598  |
| Lrrc34           | 0.216531  | 0.110477              | -0.970827  | 0.21556   | 0.561479  |
| Lrrc34_j1        | 0.0690051 | 0.117744              | 0.770878   | 0.453301  | 1         |
| Lrrc31_j2        | 0.111803  | 0 -1.79769e+308       | 7.92E-05   |           | 1         |
| Phc3             | 0.86406   | 0.567918              | 0          | 1         | 1         |
| Phc3_j4          | 0.0966189 | 0.0135508             | 0          | 1         | 1         |
| Slc7a14_j2       | 0.309147  | 0.114533              | 0          | 1         | 1         |
| Pex5l_j6         | 6.82466   | 4.99334               | -0.450753  | 0.0001476 | 0.0029744 |
| Pex5l_j5         | 1.33476   | 1.07634               | -0.310447  | 0.146497  | 0.474802  |
| Ccdc39_j12       | 0.830018  | 0.797803              | -0.0571092 | 0.810099  | 0.937876  |
| Ccdc39_j14       | 0.316421  | 0.385638              | 0.285401   | 0.29676   | 0.643452  |
| Dnajc19_j5       | 0.719222  | 0.568569              | 0          | 1         | 1         |
| Dcun1d1_j1       | 0.0978875 | 0.135244              | 0.46637    | 1         | 1         |
| Qrfpr_j4         | 0.0691673 | 0 -1.79769e+308       | 0.0387195  |           | 1         |
| Qrfpr_j2         | 0.0605022 | 0 -1.79769e+308       | 0.0657878  |           | 1         |
| Anxa5_j4         | 124.838   | 125.648               | 0          | 1         | 1         |
| Trpc3_j3         | 0.405447  | 0.183658              | 0          | 1         | 1         |
| Cetn4_j2         | 1.06433   | 0.990286              | -0.104027  | 0.846523  | 0.951509  |
| Mfsd8_j1         | 1.31488   | 0.903234              | 0          | 1         | 1         |

|                  |           |                 |            |           |           |
|------------------|-----------|-----------------|------------|-----------|-----------|
| Sc1t1_j1         | 0.591219  | 1.20068         | 1.02209    | 0.0099115 | 0.0851515 |
| Sc1t1_j2         | 0.646177  | 0.235738        | -1.45475   | 0.0302458 | 0.186728  |
| Sc1t1_j3         | 0.822082  | 0.472803        | -0.798045  | 0.0974269 | 0.38582   |
| XLOC_021321      | 0.485525  | 0.122842        | -1.98274   | 0.0195007 | 0.1385    |
| AK012035         | 0.959388  | 0.555652        | -0.787931  | 0.179154  | 0.518763  |
| Elf2_j2          | 1.03035   | 1.50245         | 0          | 1         | 1         |
| Maml3_j1         | 0.673295  | 0.576327        | 0          | 1         | 1         |
| Nhlrc3           | 0.0686064 | 0.107022        | 0.641497   | 0.373435  | 1         |
| Frem2_j8         | 0.0468423 | 0 -1.79769e+308 |            | 0.0553103 | 1         |
| XLOC_021346      | 0.123872  | 0.0797036       | -0.63613   | 0.324273  | 1         |
| AK005707_j4      | 0.319693  | 0.317463        | -0.0101026 | 0.988706  | 0.996605  |
| AK030561_j1      | 0.439413  | 0.206189        | 0          | 1         | 1         |
| Clrn1_j1         | 2.50604   | 1.61763         | 0          | 1         | 1         |
| P2ry14           | 0.306583  | 0.544786        | 0.829412   | 0.109015  | 0.410746  |
| P2ry13           | 0.214886  | 0 -1.79769e+308 |            | 1.46E-06  | 5.76E-05  |
| P2ry12           | 0.368396  | 0.361279        | 0          | 1         | 1         |
| Dhx36_j1         | 4.70108   | 4.59445         | 0          | 1         | 1         |
| Dhx36_j2         | 4.92832   | 4.27145         | 0          | 1         | 1         |
| Plch1_j1         | 0.0590169 | 0.0799971       | 0.438821   | 0.576902  | 1         |
| Ccn1_j7          | 0.483581  | 0.434475        | -0.154485  | 0.740275  | 0.909014  |
| Shox2_j1         | 0.107773  | 0               | 0          | 1         | 1         |
| Ift80_j1         | 4.69228   | 3.78852         | 0          | 1         | 1         |
| Trim59           | 0.37864   | 0.252762        | -0.583048  | 0.243061  | 0.590533  |
| Kpna4_j1         | 2.34878   | 4.50215         | 0          | 1         | 1         |
| XLOC_021391      | 0.26204   | 0.056627        | -2.21023   | 0.133649  | 0.455013  |
| Bche_j1          | 2.30163   | 1.76643         | -0.381822  | 0.0395556 | 0.222296  |
| Pdcd10_j8        | 0.560192  | 0.416191        | -0.428677  | 0.688595  | 0.884271  |
| Rapgef2_j1       | 0.160034  | 0 -1.79769e+308 |            | 0.0546711 | 0.272706  |
| Tmem144_j4       | 0.127964  | 0 -1.79769e+308 |            | 0.0056907 | 1         |
| Gria2_j2         | 0.133854  | 0.0262291       | -2.35143   | 0.005455  | 1         |
| Gucy1a3_j1       | 0.214262  | 0.111823        | -0.938156  | 0.110643  | 0.413936  |
| Npy2r_j2         | 0.476449  | 0.526056        | 0          | 1         | 1         |
| Lrat_j1          | 0.140676  | 0.194774        | 0.469417   | 0.705106  | 0.892225  |
| AK137033_j1      | 0.25687   | 0.121485        | -1.08026   | 0.256329  | 0.605242  |
| Tlr2             | 0.278633  | 0.76984         | 1.46619    | 1.14E-05  | 0.0003459 |
| D930015E06Rik_j3 | 0.592771  | 0.892656        | 0.590628   | 0.0539712 | 0.270767  |
| Mnd1_j1          | 0.152121  | 0.0779539       | -0.96453   | 0.453164  | 0.758028  |
| Fhdc1            | 0.356911  | 0.600475        | 0          | 1         | 1         |
| Fhdc1_j1         | 0.529929  | 0.139864        | 0          | 1         | 1         |
| Arfip1_j6        | 0.115322  | 0.0352115       | 0          | 1         | 1         |
| Arfip1           | 1.58742   | 1.74735         | 0          | 1         | 1         |
| AK158189_j1      | 0.0556995 | 0.0328888       | -0.760066  | 0.521566  | 1         |
| AK158189         | 0.180862  | 0.099876        | -0.856676  | 0.204126  | 0.548338  |
| Rps3a_j7         | 0.726521  | 0.538788        | -0.431288  | 0.178774  | 0.518294  |
| Cd1d1_j1         | 0.843256  | 0.981925        | 0.219642   | 0.583387  | 0.833129  |
| 4933430H15Rik_j2 | 0.144963  | 0.0660484       | -1.13409   | 0.248916  | 0.596414  |
| BC023814         | 0.37979   | 0.386883        | 0          | 1         | 1         |

|                  |           |                 |            |           |           |
|------------------|-----------|-----------------|------------|-----------|-----------|
| Bcan_j4          | 12.1365   | 10.5522         | 0          | 1         | 1         |
| Bcan_j2          | 7.49789   | 6.92503         | 0          | 1         | 1         |
| Hapln2_j2        | 33.2798   | 30.9409         | 0          | 1         | 1         |
| AK007191_j1      | 1.20258   | 0.968707        | 0          | 1         | 1         |
| Slc25a44_j1      | 0.204469  | 0.427873        | 0          | 1         | 1         |
| Lmna_j1          | 12.031    | 17.9965         | 0.580961   | 2.32E-07  | 1.13E-05  |
| Lmna_j4          | 29.0521   | 36.021          | 0.310195   | 0.0011072 | 0.0154907 |
| Robld3_j1        | 1.59598   | 1.73851         | 0.12341    | 0.802468  | 0.934285  |
| Syt11_j1         | 2.95402   | 2.34113         | 0          | 1         | 1         |
| Syt11_j3         | 33.0809   | 37.7841         | 0          | 1         | 1         |
| Rusc1_j5         | 14.5922   | 19.1277         | 0          | 1         | 1         |
| Fdps_j4          | 1.37398   | 1.35721         | -0.0177093 | 0.921699  | 0.975486  |
| Fdps_j10         | 4.39059   | 4.83787         | 0.139958   | 0.519717  | 0.797285  |
| Hcn3_j2          | 0.415175  | 0.119641        | 0          | 1         | 1         |
| Trim46_j2        | 1.13577   | 0.557137        | 0          | 1         | 1         |
| Adam15_j6        | 1.83699   | 2.41446         | 0          | 1         | 1         |
| Adam15_j7        | 0.210581  | 0.174176        | 0          | 1         | 1         |
| Zbtb7b_j1        | 1.52791   | 1.60934         | 0.0749029  | 0.732186  | 0.905282  |
| Chrb2_j2         | 4.92278   | 5.55631         | 0.174654   | 0.126786  | 0.443479  |
| Il6ra_j3         | 0.141244  | 0 -1.79769e+308 | 0.0364636  | 0.211122  |           |
| Atp8b2_j2        | 0.161512  | 0               | 0          | 1         | 1         |
| Ubp2l_j7         | 0.708923  | 0.00490291      | 0          | 1         | 1         |
| Npr1_j5          | 0.0789274 | 0 -1.79769e+308 | 0.0013991  | 0.0013991 | 1         |
| 2500003M10Rik_j8 | 31.4745   | 31.9292         | 0.0206954  | 0.86347   | 0.956634  |
| 2500003M10Rik    | 3.50867   | 3.67514         | 0.0668718  | 0.679496  | 0.879493  |
| 9130204L05Rik_j3 | 0.567537  | 0.0597408       | -3.24792   | 0.08881   | 0.365257  |
| 9130204L05Rik_j4 | 0.0941661 | 0.0538079       | -0.80739   | 0.708208  | 1         |
| Lce6a_j5         | 0.143099  | 0.0866657       | -0.723483  | 0.696062  | 0.887968  |
| Snx27_j2         | 0.116284  | 0.0389459       | 0          | 1         | 1         |
| Snx27            | 5.41978   | 4.48597         | 0          | 1         | 1         |
| Cgn_j7           | 0.109008  | 0               | 0          | 1         | 1         |
| Zfp687_j4        | 2.26337   | 1.78014         | -0.346481  | 0.0230625 | 0.155463  |
| Psm4_j1          | 0.296582  | 0.257702        | 0          | 1         | 1         |
| Psm4_j3          | 0.833245  | 2.71641         | 0          | 1         | 1         |
| Scnm1_j4         | 0.426364  | 0 -1.79769e+308 | 1.69E-06   | 6.50E-05  |           |
| Gabpb2_j3        | 1.05213   | 1.05018         | 0          | 1         | 1         |
| Tars2_j13        | 0.979451  | 0.695041        | -0.494875  | 0.0152223 | 0.116137  |
| Mrps21_j1        | 35.8256   | 37.2885         | 0.0577388  | 0.713271  | 0.896209  |
| Plekho1_j1       | 0.709322  | 0.579868        | 0          | 1         | 1         |
| Bcl9_j9          | 0.233586  | 0.180992        | 0          | 1         | 1         |
| Bcl9_j10         | 0.82677   | 0.920426        | 0          | 1         | 1         |
| Bcl9_j7          | 0.154875  | 0.407078        | 0          | 1         | 1         |
| Pde4dip_j9       | 12.343    | 13.397          | 0          | 1         | 1         |
| Phgdh_j5         | 0.225281  | 0               | 0          | 1         | 1         |
| Phgdh_j8         | 0.221945  | 0.229073        | 0          | 1         | 1         |
| Wdr3_j2          | 2.00103   | 1.44073         | -0.473945  | 0.120001  | 0.431269  |
| Ttf2_j1          | 2.49553   | 2.15651         | -0.210646  | 0.449417  | 0.755499  |

|                  |           |           |               |           |           |
|------------------|-----------|-----------|---------------|-----------|-----------|
| Atp1a1_j5        | 4.68211   | 3.22304   | 0             | 1         | 1         |
| Slc22a15_j2      | 0.0481066 | 0         | -1.79769e+308 | 0.0026851 | 1         |
| Slc22a15_j3      | 0.590025  | 0.899249  | 0.607944      | 0.004179  | 0.0442693 |
| Vangl1_j3        | 0.127664  | 0         | 0             | 1         | 1         |
| Vangl1_j6        | 0.114226  | 0         | 0             | 1         | 1         |
| Gm16520_j1       | 0.127707  | 0.0587362 | -1.12052      | 0.208503  | 1         |
| Hipk1_j3         | 0.165896  | 0         | 0             | 1         | 1         |
| Magi3_j4         | 7.75686   | 7.43665   | 0             | 1         | 1         |
| Lrig2_j2         | 0.919029  | 0.0977543 | -3.23288      | 2.98E-10  | 2.74E-08  |
| Mov10_j1         | 0.428662  | 0.170296  | 0             | 1         | 1         |
| Capza1_j2        | 0.144427  | 0.0587046 | -1.2988       | 0.121764  | 0.434527  |
| Chi3l3_j1        | 0.171592  | 0.0996063 | -0.784671     | 0.694342  | 0.887232  |
| Cd53_j2          | 0.2959    | 0.246942  | -0.260938     | 0.731314  | 0.904922  |
| Fam40a_j2        | 0.783609  | 0.788852  | 0.00962134    | 0.983947  | 0.995283  |
| Ampd2_j1         | 3.81878   | 2.97311   | 0             | 1         | 1         |
| Ampd2_j2         | 5.05543   | 4.17469   | 0             | 1         | 1         |
| Gnai3_j2         | 2.67313   | 1.52856   | 0             | 1         | 1         |
| Gpr61_j1         | 0.319604  | 0.441465  | 0             | 1         | 1         |
| Atxn7l2_j4       | 0.0376834 | 0.135879  | 0             | 1         | 1         |
| Celsr2_j2        | 0.110679  | 0.0741178 | -0.578494     | 0.254348  | 1         |
| 5330417C22Rik_j1 | 1.07035   | 0.602288  | -0.829558     | 0.001036  | 0.0146926 |
| Prpf38b_j6       | 0.476683  | 0.326935  | 0             | 1         | 1         |
| Prpf38b_j5       | 0.18483   | 0.486922  | 0             | 1         | 1         |
| Ntng1_j1         | 0.522861  | 8.49E-05  | 0             | 1         | 1         |
| Ntng1_j2         | 2.81335   | 1.84244   | 0             | 1         | 1         |
| Prmt6_j1         | 0.915948  | 0.574192  | -0.673732     | 0.0084897 | 0.0758125 |
| Rnpc3_j7         | 3.31272   | 2.64045   | 0             | 1         | 1         |
| Cdc14a_j1        | 0.610819  | 0.761922  | 0.318898      | 0.405013  | 0.726949  |
| Cdc14a_j2        | 0.392433  | 0.407435  | 0.0541217     | 0.907916  | 0.971006  |
| Cdc14a_j3        | 0.187851  | 0.2284    | 0.281967      | 0.611207  | 0.846796  |
| Cdc14a_j4        | 0.141355  | 0.147738  | 0.0637158     | 0.913906  | 0.972962  |
| Ccdc76_j1        | 0.354081  | 0.249306  | -0.506161     | 0.365256  | 0.699065  |
| Ccdc76           | 0.709838  | 0.924759  | 0.381587      | 0.267485  | 0.616277  |
| Ccdc76_j2        | 0.390547  | 0.268541  | -0.540354     | 0.38161   | 0.711979  |
| Slc35a3_j3       | 0.448829  | 0.261688  | -0.778319     | 0.0629808 | 0.297262  |
| Agl_j1           | 0.0900362 | 0.0194615 | 0             | 1         | 1         |
| Agl_j6           | 0.603674  | 0.189702  | 0             | 1         | 1         |
| Palmd_j1         | 0.84298   | 0.871134  | 0             | 1         | 1         |
| Ptbp2_j2         | 1.94196   | 1.69944   | 0             | 1         | 1         |
| Ptbp2_j3         | 2.91917   | 1.94958   | 0             | 1         | 1         |
| Abcd3_j5         | 10.7313   | 11.0905   | 0             | 1         | 1         |
| Abcd3            | 2.85426   | 2.15134   | 0             | 1         | 1         |
| Fnbp1_j4         | 0.140524  | 0.0510872 | 0             | 1         | 1         |
| Usp53_j1         | 0.13176   | 0         | -1.79769e+308 | 0.0003056 | 1         |
| Usp53_j2         | 0.0350858 | 0.13178   | 1.90917       | 0.0094751 | 1         |
| AK041310         | 0.381008  | 0.293522  | 0             | 1         | 1         |
| Ank2_j8          | 1.10377   | 0.478701  | 0             | 1         | 1         |

|               |           |                 |            |           |           |
|---------------|-----------|-----------------|------------|-----------|-----------|
| Ank2_j9       | 8.17219   | 7.76279         | 0          | 1         | 1         |
| Ank2_j10      | 6.36906   | 5.59933         | 0          | 1         | 1         |
| Larp7_j3      | 1.29584   | 1.51816         | 0.228433   | 0.513803  | 0.793006  |
| Alpk1_j1      | 0.0884497 | 0.329211        | 0          | 1         | 1         |
| Alpk1_j11     | 0.395398  | 0.0234502       | 0          | 1         | 1         |
| Ap1ar_j4      | 22.0984   | 8.27687         | 0          | 1         | 1         |
| Egf_j2        | 0.0576376 | 0.00351544      | -4.03523   | 0.264052  | 1         |
| Egf_j1        | 0.0624896 | 0 -1.79769e+308 |            | 0.0049502 | 1         |
| Ccdc109b_j1   | 9.07615   | 10.3998         | 0.196401   | 0.325307  | 0.66849   |
| Sec24b_j5     | 1.84795   | 1.21955         | 0          | 1         | 1         |
| Sec24b_j7     | 0.981476  | 1.76644         | 0          | 1         | 1         |
| Sec24b_j6     | 2.51252   | 2.71599         | 0          | 1         | 1         |
| Rpl34_j2      | 0.334727  | 0.438668        | 0.390145   | 0.638876  | 0.860184  |
| Aimp1_j2      | 0.294835  | 0 -1.79769e+308 |            | 0.0029795 | 0.0342587 |
| Bank1_j5      | 0.130288  | 0 -1.79769e+308 |            | 0.0036206 | 1         |
| Bank1_j4      | 0.440174  | 0.00762284      | -5.8516    | 0.0573828 | 0.280663  |
| Gm15688       | 0.0609999 | 0 -1.79769e+308 |            | 0.114699  | 1         |
| Bmpr1b_j8     | 0.0695178 | 0 -1.79769e+308 |            | 0.0014969 | 1         |
| Bmpr1b_j6     | 0.0963972 | 0 -1.79769e+308 |            | 0.0002269 | 1         |
| Bmpr1b_j7     | 0.0707516 | 0 -1.79769e+308 |            | 0.0013637 | 1         |
| Bmpr1b        | 0.16827   | 0.067066        | -1.32712   | 0.0672359 | 0.310054  |
| Pdlim5        | 0.0817889 | 0.306554        | 0          | 1         | 1         |
| Clca5_j3      | 0.0955058 | 0.0725366       | -0.396879  | 0.636251  | 1         |
| Lphn2_j1      | 2.02334   | 2.02966         | 0.00449326 | 0.98553   | 0.995706  |
| Lphn2_j3      | 0.442789  | 0.324899        | -0.44663   | 0.202252  | 0.545802  |
| Ifi44_j1      | 0.151477  | 0.0746357       | -1.02116   | 0.411814  | 0.730902  |
| Ifi44_j2      | 0.0516583 | 1.44E-05        | -11.8072   | 0.989298  | 1         |
| Ifi44_j3      | 0.314362  | 0.235264        | -0.418146  | 0.353168  | 0.689667  |
| Ptgfr_j2      | 0.687167  | 0.0345186       | -4.31521   | 3.80E-08  | 2.30E-06  |
| XLOC_021707   | 0.319736  | 0.168499        | -0.924147  | 0.0088593 | 0.0782746 |
| Dnajb4_j2     | 1.31201   | 0.628324        | 0          | 1         | 1         |
| Fam73a_j3     | 13.8682   | 12.5037         | 0          | 1         | 1         |
| St6galnac5_j1 | 0.265581  | 0.572549        | 0          | 1         | 1         |
| St6galnac3_j2 | 0.338119  | 0.233322        | -0.535208  | 0.108734  | 0.410101  |
| Tyw3          | 1.32513   | 1.09095         | -0.28055   | 0.164411  | 0.500371  |
| Fpgt_j1       | 0.198451  | 0.433609        | 0          | 1         | 1         |
| Srsf11_j2     | 0.92863   | 0.625951        | 0          | 1         | 1         |
| Lrrc7_j4      | 0.0712235 | 0.062256        | -0.19414   | 0.872059  | 1         |
| Chmp4c_j1     | 0.105954  | 0.107183        | 0.0166389  | 0.981998  | 1         |
| Raly1_j1      | 0.167746  | 0.0981535       | -0.773169  | 0.349488  | 0.687145  |
| Car3_j1       | 4.04021   | 31.3693         | 2.95685    | 0         | 0         |
| Car2_j2       | 7.64045   | 7.08991         | -0.10789   | 0.646414  | 0.863677  |
| XLOC_020763   | 0.147397  | 0.152073        | 0.0450593  | 0.957905  | 0.987996  |
| XLOC_020770   | 0.0907041 | 0.193974        | 1.09663    | 0.311154  | 0.655926  |
| Hltf_j3       | 0.243079  | 0.150624        | -0.690478  | 0.366229  | 0.700066  |
| XLOC_020778   | 0.0509408 | 0.0538793       | 0.0809078  | 0.945729  | 1         |
| Tbl1xr1_j2    | 0.436159  | 0.250624        | 0          | 1         | 1         |

|                  |           |                        |           |           |           |
|------------------|-----------|------------------------|-----------|-----------|-----------|
| XLOC_020782      | 0.192662  | 0.399743               | 1.053     | 0.0019877 | 0.0248414 |
| Tnfsf10_j2       | 0.0285754 | 0.240302               | 3.072     | 0.0004636 | 0.0076457 |
| Pld1_j4          | 0         | 0.13996 1.79769e+308   |           | 0.0009011 | 1         |
| Rpl22l1_j8       | 0         | 0.0736625 1.79769e+308 |           | 0.128918  | 1         |
| Egfm1_j2         | 0.196357  | 0.764079               | 1.96024   | 0.0081049 | 0.0733282 |
| Egfm1_j11        | 0         | 0.188176 1.79769e+308  |           | 0.0073547 | 0.0683294 |
| Mynn             | 0.946671  | 1.01815                | 0.10501   | 0.647345  | 0.864073  |
| Gpr160_j3        | 0.277398  | 0.354845               | 0.35523   | 0.568865  | 0.825693  |
| Gpr160_j11       | 0.116388  | 0.140102               | 0.267527  | 0.775324  | 1         |
| Skil_j1          | 1.41269   | 1.6081                 | 0.186915  | 0.274238  | 0.623353  |
| Kcnmb2_j1        | 0         | 0.0600981 1.79769e+308 |           | 0.0728302 | 1         |
| Usp13_j3         | 0.031804  | 0.294137               | 0         | 1         | 1         |
| Sox2ot_j4        | 0.389052  | 0.303063               | -0.360345 | 0.417816  | 0.734876  |
| XLOC_020811      | 0.17288   | 0.236304               | 0.450878  | 0.379971  | 0.711076  |
| Fgf2_j1          | 1.67701   | 2.19833                | 0.390516  | 0.0134603 | 0.106582  |
| Spry1_j1         | 0.100497  | 0.328485               | 1.70868   | 0.0246115 | 0.162594  |
| Hspa4l_j1        | 1.77495   | 6.51809                | 0         | 1         | 1         |
| Plk4_j4          | 0         | 0.130382 1.79769e+308  |           | 0.016981  | 1         |
| Phf17            | 0         | 0.678222               | 0         | 1         | 1         |
| Pcdh10_j1        | 3.3208    | 2.9449                 | 0         | 1         | 1         |
| Naa15_j1         | 8.90716   | 8.8405                 | 0         | 1         | 1         |
| Rab33b_j1        | 5.43835   | 6.85304                | 0         | 1         | 1         |
| XLOC_020844      | 0.126146  | 0.22435                | 0.830654  | 0.167504  | 0.504072  |
| 2810046L04Rik_j2 | 1.0951    | 0.7236                 | -0.597792 | 0.108987  | 0.410746  |
| Trpc4_j5         | 0.173184  | 0.0934549              | -0.889966 | 0.238368  | 0.585308  |
| Fam48a_j1        | 5.81616   | 6.46239                | 0.152001  | 0.228178  | 0.575243  |
| Spg20            | 2.55828   | 2.20832                | 0         | 1         | 1         |
| Spg20            | 0.246169  | 0.321728               | 0         | 1         | 1         |
| Spg20_j2         | 0         | 0.23764                | 0         | 1         | 1         |
| Tsc22d2          | 0.263593  | 0.293593               | 0         | 1         | 1         |
| 2810407C02Rik_j2 | 34.1408   | 34.0547                | 0         | 1         | 1         |
| Med12l_j3        | 0.0934783 | 0.0986444              | 0.0776054 | 0.883495  | 1         |
| Med12l_j7        | 0.0104566 | 0.0586201              | 2.48699   | 0.034984  | 1         |
| XLOC_020874      | 0.188701  | 0.131475               | -0.521312 | 0.565048  | 0.823689  |
| Mme_j2           | 0.376484  | 0.313117               | 0         | 1         | 1         |
| Kcnab1_j2        | 0         | 0.291194 1.79769e+308  |           | 0.0001166 | 0.0024454 |
| Kcnab1_j4        | 40.7582   | 32.5699                | -0.323554 | 0.0003133 | 0.005536  |
| Ptx3_j1          | 0.033445  | 0.0687678              | 1.03994   | 0.604598  | 1         |
| Rsrc1_j1         | 0.53713   | 0.684799               | 0.350409  | 0.556039  | 0.818663  |
| lqcj-schip1_j1   | 0.221932  | 0.380815               | 0.778971  | 0.271896  | 0.620718  |
| Schip1           | 2.59629   | 3.4329                 | 0.40298   | 0.0563265 | 0.277694  |
| Ppm1l_j3         | 4.4907    | 7.57633                | 0         | 1         | 1         |
| Otol1_j1         | 0.0701353 | 0.186644               | 1.41208   | 0.163243  | 0.498589  |
| Otol1            | 0.032896  | 0.110808               | 1.75208   | 0.404061  | 1         |
| Serpini1_j1      | 34.7794   | 29.8265                | -0.221637 | 0.0370691 | 0.213238  |
| Fstl5_j2         | 0.0449402 | 0.0790292              | 0         | 1         | 1         |
| Mtap9_j2         | 0.636736  | 0.865607               | 0         | 1         | 1         |



|                  |           |           |              |           |           |
|------------------|-----------|-----------|--------------|-----------|-----------|
| Plrg1_j1         | 4.60869   | 6.81645   | 0.564662     | 0.0081739 | 0.0737736 |
| Sh3d19_j3        | 0.54021   | 0.42516   | 0            | 1         | 1         |
| Lrba_j6          | 0.0431881 | 0.0476902 | 0.143059     | 0.848777  | 1         |
| Lrba_j12         | 0.190604  | 0.670509  | 1.81468      | 0.0051416 | 0.0517901 |
| Arhgef11_j11     | 1.402     | 1.34107   | 0            | 1         | 1         |
| Insrr_j3         | 0.4069    | 0.381883  | -0.0915455   | 0.741319  | 0.909259  |
| Mrpl24           | 4.46817   | 5.07128   | 0            | 1         | 1         |
| Mef2d_j1         | 0         | 0.236136  | 0            | 1         | 1         |
| Cct3_j4          | 0         | 1.15048   | 1.79769e+308 | 4.46E-05  | 0.0010828 |
| Cct3_j6          | 10.2153   | 14.4774   | 0.50307      | 0.0117695 | 0.0967472 |
| Arhgef2          | 0.135403  | 0.386851  | 0            | 1         | 1         |
| 2810403A07Rik_j4 | 0.0569991 | 0.0217077 | 0            | 1         | 1         |
| Ash1l_j3         | 0.0170788 | 0.103887  | 0            | 1         | 1         |
| Clk2_j2          | 0.202856  | 0.042408  | 0            | 1         | 1         |
| Gba              | 5.1227    | 5.23303   | 0            | 1         | 1         |
| Gba_j1           | 7.50763   | 5.78392   | 0            | 1         | 1         |
| Thbs3_j7         | 0.0363881 | 0.060492  | 0            | 1         | 1         |
| Thbs3_j5         | 0.315328  | 0.485685  | 0            | 1         | 1         |
| Thbs3_j6         | 0.0845124 | 0.260411  | 0            | 1         | 1         |
| Thbs3_j12        | 0.642476  | 0.75933   | 0            | 1         | 1         |
| Adar_j1          | 0         | 0.175502  | 1.79769e+308 | 1.35E-05  | 0.0003996 |
| She_j1           | 0.0910654 | 0.0993646 | 0.125828     | 0.918397  | 1         |
| 4933434E20Rik    | 6.7308    | 4.18547   | 0            | 1         | 1         |
| Dennd4b_j5       | 0.0710257 | 0.0603471 | -0.235056    | 0.775982  | 1         |
| S100a13_j2       | 0.585619  | 0.628492  | 0.101931     | 0.720334  | 0.899707  |
| S100a16_j1       | 12.8693   | 4.76376   | 0            | 1         | 1         |
| S100a16_j2       | 19.436    | 26.9521   | 0            | 1         | 1         |
| Sprr2i           | 0.101457  | 0.335784  | 1.72667      | 0.0410736 | 0.227829  |
| Sprr2j-ps        | 0.0655332 | 0.65264   | 3.31599      | 0.001826  | 0.0232422 |
| S100a11_j2       | 12.2802   | 35.3901   | 1.52701      | 6.66E-16  | 1.51E-13  |
| XLOC_020987      | 0.0904755 | 0.257746  | 1.51035      | 0.0006664 | 0.0103286 |
| S100a10_j4       | 171.936   | 325.251   | 0.919683     | 0         | 0         |
| Tdrkh_j2         | 1.08658   | 0.512208  | 0            | 1         | 1         |
| Tdrkh_j5         | 0.250694  | 0.192416  | 0            | 1         | 1         |
| Celf3_j7         | 0.487096  | 0.499929  | 0            | 1         | 1         |
| Pogz_j4          | 0.0522999 | 0.0743782 | 0            | 1         | 1         |
| Pogz_j7          | 0.0903941 | 0.125384  | 0            | 1         | 1         |
| Sema6c_j2        | 0.393233  | 0.600007  | 0            | 1         | 1         |
| Sema6c           | 0.250594  | 0.469369  | 0            | 1         | 1         |
| Sema6c_j8        | 0.0849181 | 0.131854  | 0            | 1         | 1         |
| Cdc42se1_j2      | 22.7307   | 28.9015   | 0            | 1         | 1         |
| Lass2_j2         | 0.308894  | 0.270468  | 0            | 1         | 1         |
| Ctsk_j1          | 1.60818   | 1.42398   | -0.175497    | 0.593242  | 0.83794   |
| Ctsk_j2          | 2.63393   | 2.63166   | -0.00124332  | 0.996877  | 0.999112  |
| Mcl1_j1          | 21.1707   | 24.6723   | 0.220827     | 0.0264397 | 0.170811  |
| Aph1a_j6         | 0.0381608 | 0.0693311 | 0.86141      | 0.321414  | 1         |
| Otud7b_j6        | 0         | 0.0832747 | 0            | 1         | 1         |

|                  |           |                       |            |           |           |
|------------------|-----------|-----------------------|------------|-----------|-----------|
| Otud7b_j8        | 0         | 0.083538              | 0          | 1         | 1         |
| Mtmr11_j1        | 0.334714  | 0.294688              | -0.183738  | 0.698905  | 0.889085  |
| Sf3b4_j4         | 0.515221  | 0.548656              | 0          | 1         | 1         |
| Sf3b4_j8         | 0.713248  | 0.259375              | 0          | 1         | 1         |
| Itga10_j3        | 0.116159  | 0.170598              | 0.554498   | 0.307721  | 0.652771  |
| Itga10_j8        | 0.0589617 | 0.106775              | 0.856724   | 0.425586  | 1         |
| Fmo5_j2          | 0.115486  | 0.0706688             | -0.70857   | 0.332552  | 1         |
| Prkab2_j2        | 14.791    | 18.2808               | 0          | 1         | 1         |
| Notch2           | 0.432049  | 0.445273              | 0          | 1         | 1         |
| Hmgcs2_j1        | 22.1155   | 21.5913               | -0.0346064 | 0.702786  | 0.891161  |
| Zfp697_j1        | 0.230256  | 0.333175              | 0          | 1         | 1         |
| Nhlh2_j4         | 6.00E-05  | 0.489299              | 12.9927    | 0.938338  | 0.981145  |
| Csde1_j3         | 1.10704   | 1.58984               | 0          | 1         | 1         |
| Bcas2_j1         | 6.13955   | 7.30183               | 0.250125   | 0.283037  | 0.631561  |
| Trim33_j1        | 1.18797   | 1.21401               | 0          | 1         | 1         |
| Syt6             | 1.46016   | 1.45535               | 0          | 1         | 1         |
| Rsb1_j1          | 1.35523   | 1.50509               | 0          | 1         | 1         |
| Phtf1_j9         | 0.238944  | 0.293249              | 0          | 1         | 1         |
| Slc16a1_j1       | 1.2243    | 2.55726               | 0          | 1         | 1         |
| XLOC_021071      | 0.0519077 | 0.105196              | 1.01905    | 0.399065  | 1         |
| Ppm1j_j6         | 42.5071   | 40.9014               | 0          | 1         | 1         |
| Rhoc_j1          | 12.6961   | 22.3924               | 0          | 1         | 1         |
| St7l_j2          | 0.479884  | 0.271604              | -0.821177  | 0.0080125 | 0.0726135 |
| Kcnd3_j4         | 14.819    | 11.6041               | -0.352815  | 0.0002807 | 0.0050648 |
| XLOC_021078      | 0.102293  | 0.114621              | 0.164161   | 0.866659  | 1         |
| Kcna2_j6         | 8.91385   | 8.09945               | 0          | 1         | 1         |
| Slc16a4_j1       | 0.49502   | 0.617885              | 0.319851   | 0.43047   | 0.743178  |
| XLOC_021094      | 0.292282  | 0.44749               | 0.614496   | 0.0242229 | 0.160746  |
| Psrc1_j2         | 0.0222141 | 0.115612              | 2.37974    | 0.134262  | 1         |
| Psrc1_j6         | 0.0704567 | 0.208932              | 1.56823    | 0.337382  | 0.677935  |
| Wdr47_j1         | 2.31755   | 0.208422              | 0          | 1         | 1         |
| Wdr47_j4         | 11.6673   | 10.6104               | 0          | 1         | 1         |
| Vav3_j4          | 1.43665   | 0.878302              | 0          | 1         | 1         |
| Col11a1_j3       | 0.151035  | 0.03801               | 0          | 1         | 1         |
| Olfm3_j1         | 1.01686   | 0.8838                | -0.202324  | 0.406025  | 0.727612  |
| Dbt_j3           | 0.234389  | 0.738984              | 1.65664    | 0.0001596 | 0.0031791 |
| XLOC_021118      | 0         | 0.125854              | 0          | 1         | 1         |
| XLOC_021121      | 0.0782334 | 0.177085              | 1.17858    | 0.329212  | 0.671446  |
| XLOC_021122      | 1.45064   | 1.32787               | 0          | 1         | 1         |
| XLOC_021122      | 1.0636    | 1.01193               | 0          | 1         | 1         |
| Cnn3_j1          | 40.3432   | 44.7825               | 0          | 1         | 1         |
| Arhgap29_j1      | 0.412325  | 0.684846              | 0          | 1         | 1         |
| Sec24d_j3        | 0.181966  | 0.417614              | 0          | 1         | 1         |
| 4930422G04Rik_j3 | 0         | 0.046747 1.79769e+308 |            | 0.0250631 | 1         |
| Elovl6_j2        | 0.316101  | 2.39681               | 0          | 1         | 1         |
| Cfi_j1           | 0         | 0.34773 1.79769e+308  |            | 7.62E-05  | 0.0017011 |
| Col25a1_j6       | 0         | 0.10322 1.79769e+308  |            | 0.0049748 | 1         |

|                  |            |                        |            |           |           |
|------------------|------------|------------------------|------------|-----------|-----------|
| Ints12_j2        | 0.352974   | 1.68842                | 0          | 1         | 1         |
| Nhedc2_j3        | 0          | 0.10279 1.79769e+308   | 0.0531884  |           | 1         |
| Nhedc2_j8        | 0.119018   | 0.113563               | -0.0676846 | 0.952078  | 1         |
| Ube2d2b          | 0          | 0.0538768 1.79769e+308 | 0.0348454  |           | 1         |
| Manba_j1         | 0          | 0.0711618 1.79769e+308 | 0.0313901  |           | 1         |
| Manba_j3         | 0          | 0.131556 1.79769e+308  | 0.0087421  |           | 1         |
| Ppp3ca_j1        | 0.819674   | 2.77228                | 0          | 1         | 1         |
| Ppp3ca_j7        | 0          | 0.241381               | 0          | 1         | 1         |
| Mapksp1_j1       | 0.0182667  | 0.0505799              | 1.46935    | 0.333478  | 1         |
| Mapksp1_j8       | 0.574312   | 0.442734               | -0.375397  | 0.229046  | 0.576167  |
| Eif4e_j7         | 0.25415    | 0.423246               | 0          | 1         | 1         |
| XLOC_021183      | 0          | 0.160168               | 0          | 1         | 1         |
| Gbp6_j1          | 1.49113    | 1.11114                | 0          | 1         | 1         |
| Ccb12            | 1.29648    | 1.17585                | -0.140896  | 0.547793  | 0.813886  |
| XLOC_021191      | 0.244501   | 0.224039               | -0.126091  | 0.73917   | 0.908403  |
| Sep15_j2         | 0.166567   | 0.227902               | 0          | 1         | 1         |
| Odf2l            | 0.915638   | 0.885644               | -0.0480504 | 0.888521  | 0.964658  |
| Odf2l_j5         | 0          | 0.311642 1.79769e+308  | 0.0016854  | 0.0217615 |           |
| Col24a1_j9       | 0.217068   | 0.411298               | 0          | 1         | 1         |
| Syde2_j1         | 0.00456626 | 0.0861537              | 4.23783    | 0.220622  | 1         |
| Mcoln2           | 0          | 0.529624 1.79769e+308  | 3.33E-06   | 0.000119  |           |
| Lpar3_j6         | 0          | 0.379852 1.79769e+308  | 0.0232136  | 0.156068  |           |
| Gng5             | 0.81641    | 0.999119               | 0.291362   | 0.315583  | 0.659632  |
| Uox_j1           | 0.0433132  | 0.257035               | 2.56908    | 7.29E-05  | 0.0016388 |
| Ttll7_j3         | 8.86227    | 6.3749                 | 0          | 1         | 1         |
| Elt1_j2          | 0.15174    | 0.238438               | 0          | 1         | 1         |
| Fubp1            | 5.50451    | 4.81904                | 0          | 1         | 1         |
| Zzz3_j2          | 0.0678407  | 0.00158896             | 0          | 1         | 1         |
| Zzz3_j3          | 0.285944   | 0.265012               | 0          | 1         | 1         |
| XLOC_021218      | 0.290927   | 0.196259               | -0.567898  | 0.617333  | 0.84948   |
| Pigk_j1          | 0.507894   | 0.144089               | -1.81757   | 0.0233076 | 0.156505  |
| Pigk_j4          | 0.657624   | 0.536039               | -0.294924  | 0.527984  | 0.801874  |
| Pigk_j3          | 0.668908   | 0.496083               | -0.431228  | 0.341173  | 0.681074  |
| 4922501L14Rik_j2 | 0.260737   | 0.507859               | 0          | 1         | 1         |
| 4922501L14Rik_j1 | 0.676329   | 0.299643               | 0          | 1         | 1         |
| Lrriq3_j2        | 0          | 0.0639149 1.79769e+308 | 0.0791235  |           | 1         |
| Il7_j4           | 0          | 0.388887 1.79769e+308  | 0.0003828  | 0.0065433 |           |
| Mrps28           | 15.7487    | 16.2833                | 0.0481612  | 0.741454  | 0.909295  |
| Tpd52_j11        | 0.668195   | 0.366245               | 0          | 1         | 1         |
| Tpd52_j9         | 4.12005    | 5.11593                | 0          | 1         | 1         |
| Tpd52_j12        | 0          | 3.01532                | 0          | 1         | 1         |
| Pag1_j1          | 0.229859   | 0.162817               | 0          | 1         | 1         |
| Snx16_j1         | 7.68773    | 7.52292                | 0          | 1         | 1         |
| AK140446_j1      | 0.167164   | 0.223198               | 0.417061   | 0.545018  | 0.811904  |
| Cyp7b1_j1        | 1.28291    | 1.54275                | 0.266084   | 0.320964  | 0.664116  |
| Crh_j2           | 0          | 0.0925327 1.79769e+308 | 0.0553701  |           | 1         |
| Cpb1_j7          | 0          | 0.116252 1.79769e+308  | 0.0391116  |           | 1         |

|                  |           |           |              |           |           |
|------------------|-----------|-----------|--------------|-----------|-----------|
| Cpb1_j6          | 0.496868  | 0.783327  | 0.656751     | 0.123399  | 0.437384  |
| XLOC_021273      | 0.0306183 | 0.217557  | 2.82893      | 0.105527  | 0.403518  |
| Nlgn1_j1         | 2.69E-05  | 0.400733  | 0            | 1         | 1         |
| Nlgn1_j3         | 0.165936  | 0.186021  | 0.164836     | 0.801169  | 0.933726  |
| Nlgn1_j7         | 0         | 0.100303  | 1.79769e+308 | 0.105057  | 1         |
| Fndc3b_j1        | 1.0702    | 1.22361   | 0            | 1         | 1         |
| Fndc3b           | 1.09431   | 1.04291   | 0            | 1         | 1         |
| XLOC_021279      | 0.0168092 | 0.179923  | 3.42005      | 0.101054  | 0.393603  |
| Phc3_j7          | 0.0298758 | 0.167903  | 0            | 1         | 1         |
| Phc3_j9          | 0.030817  | 0.3257    | 0            | 1         | 1         |
| Slc7a14_j1       | 0.0880217 | 0.282295  | 0            | 1         | 1         |
| Zmat3_j4         | 0         | 2.50545   | 0            | 1         | 1         |
| Pex5l            | 2.61173   | 3.02647   | 0.212629     | 0.14493   | 0.472616  |
| Ccdc39_j8        | 0.544033  | 0.396166  | -0.457589    | 0.0594253 | 0.286621  |
| Dnajc19          | 0.491981  | 0.193413  | 0            | 1         | 1         |
| Dnajc19_j1       | 0         | 0.0928739 | 0            | 1         | 1         |
| RP24-396D16.1_j1 | 0         | 0.12845   | 1.79769e+308 | 0.0617181 | 1         |
| Mccc1_j8         | 0.951307  | 0.856378  | -0.151663    | 0.664065  | 0.872733  |
| Anxa5_j5         | 10.7274   | 21.9172   | 0            | 1         | 1         |
| Anxa5_j7         | 9.1487    | 18.3438   | 0            | 1         | 1         |
| AK043581_j3      | 0         | 0.0565215 | 0            | 1         | 1         |
| AK043581_j4      | 1.71888   | 2.61641   | 0            | 1         | 1         |
| Trpc3_j4         | 0.856     | 0.857825  | 0            | 1         | 1         |
| Pgrmc2_j1        | 12.9608   | 13.3835   | 0            | 1         | 1         |
| AK012035_j8      | 0.143137  | 0.112854  | -0.342941    | 0.755328  | 0.915526  |
| AK012035_j9      | 0.188295  | 0.125386  | -0.586618    | 0.594467  | 0.838528  |
| Ndufc1_j2        | 7.35798   | 7.78523   | 0            | 1         | 1         |
| AK144834_j1      | 0.115727  | 0.325884  | 1.49363      | 0.131422  | 0.451337  |
| Nhlrc3_j2        | 0.0949135 | 0.0523455 | -0.858547    | 0.329941  | 1         |
| Nbea_j5          | 0.632893  | 0.32691   | 0            | 1         | 1         |
| XLOC_021350      | 0.123945  | 0.155427  | 0.326535     | 0.808717  | 1         |
| Plch1_j4         | 0.0649761 | 0.107938  | 0.732221     | 0.387769  | 1         |
| AK161073_j2      | 0         | 0.0514268 | 1.79769e+308 | 0.110342  | 1         |
| AK161073_j1      | 0.164046  | 0.232206  | 0.501304     | 0.423065  | 0.738643  |
| Ccnl1_j5         | 0.453662  | 1.83664   | 2.01738      | 2.99E-07  | 1.42E-05  |
| Lxn_j1           | 6.72498   | 8.02696   | 0.255323     | 0.266496  | 0.615602  |
| Ift80_j4         | 0.60373   | 0.909995  | 0            | 1         | 1         |
| XLOC_021391      | 0.100872  | 0.441379  | 2.12949      | 0.0193549 | 0.137786  |
| Pdcd10_j4        | 0.575282  | 0.394435  | -0.544483    | 0.668593  | 0.874544  |
| Pdcd10_j5        | 0.749516  | 0.509687  | -0.556346    | 0.51886   | 0.796709  |
| Pdcd10_j6        | 1.48781   | 0.5277    | -1.4954      | 0.140927  | 0.466904  |
| Golim4_j3        | 0         | 0.160003  | 1.79769e+308 | 0.0033504 | 0.0375832 |
| Fnip2_j1         | 0.516226  | 0.350467  | 0            | 1         | 1         |
| Etfdh_j1         | 9.27017   | 9.16373   | -0.0166613   | 0.920899  | 0.97524   |
| Rxfp1_j4         | 0.126416  | 0.150155  | 0.248275     | 0.699708  | 1         |
| Tmem144_j2       | 0.188481  | 0.302291  | 0.681519     | 0.191926  | 0.534088  |
| Tmem144_j1       | 0.0584767 | 0.126124  | 1.10891      | 0.260164  | 1         |

|                  |            |                 |           |           |           |
|------------------|------------|-----------------|-----------|-----------|-----------|
| Gria2_j7         | 2.15155    | 1.48317         | -0.536689 | 0.0029023 | 0.0335293 |
| Gria2_j8         | 0.7275     | 0.508068        | -0.517926 | 0.157932  | 0.49215   |
| Gria2_j9         | 0.0629232  | 0.0278748       | -1.17463  | 0.286965  | 1         |
| Glrj2            | 38.1385    | 28.0085         | 0         | 1         | 1         |
| Gucy1b3_j1       | 0.12772    | 0.162829        | 0.35037   | 0.612608  | 0.847359  |
| Trim2_j2         | 0          | 1.25271         | 0         | 1         | 1         |
| Arfp1_j4         | 0          | 0.143987        | 0         | 1         | 1         |
| AK158189_j2      | 0.136346   | 0.294873        | 1.11282   | 0.0247838 | 0.163268  |
| Rps3a_j5         | 0.539998   | 1.13125         | 1.06689   | 0.0006712 | 0.010387  |
| Dclk2_j1         | 4.56642    | 3.73395         | 0         | 1         | 1         |
| Dclk2_j2         | 5.95285    | 5.1362          | 0         | 1         | 1         |
| Kirrel_j3        | 1.77093    | 2.34829         | 0         | 1         | 1         |
| Kirrel           | 0.712774   | 0.50887         | 0         | 1         | 1         |
| Pear1_j5         | 0.206397   | 0.239515        | 0         | 1         | 1         |
| BC023814_j2      | 1.67951    | 1.79272         | 0         | 1         | 1         |
| Bcan_j3          | 0.203506   | 0.204304        | 0         | 1         | 1         |
| Lmna_j2          | 4.90856    | 6.0368          | 0.298486  | 0.0448177 | 0.241879  |
| Lmna_j5          | 0.0660884  | 0.354278        | 2.42241   | 0.0056575 | 0.0558291 |
| Syt11            | 0.756526   | 0.641181        | 0         | 1         | 1         |
| Syt11_j4         | 15.6837    | 22.712          | 0         | 1         | 1         |
| Rusc1_j2         | 0.990483   | 0.745429        | 0         | 1         | 1         |
| Fdps_j8          | 0.29587    | 0.553929        | 0.904739  | 0.139952  | 0.46539   |
| Fdps_j7          | 0.917712   | 0.553211        | -0.730212 | 0.142671  | 0.469414  |
| Trim46           | 4.91005    | 4.47863         | 0         | 1         | 1         |
| Trim46           | 3.65528    | 6.16002         | 0         | 1         | 1         |
| Flad1_j2         | 1.31578    | 1.97001         | 0.582278  | 0.0211994 | 0.146549  |
| Atp8b2_j3        | 7.82058    | 8.50784         | 0         | 1         | 1         |
| Atp8b2_j4        | 0.00371012 | 1.72349         | 0         | 1         | 1         |
| Ubap2l_j3        | 1.04463    | 1.49749         | 0         | 1         | 1         |
| Ubap2l_j8        | 5.80796    | 5.08861         | 0         | 1         | 1         |
| Ubap2l_j9        | 0.636062   | 0               | 0         | 1         | 1         |
| Ubap2l_j11       | 1.43427    | 1.8072          | 0         | 1         | 1         |
| Creb3l4_j2       | 0.0745304  | 0.0938087       | 0.331893  | 0.824337  | 1         |
| Slc27a3_j1       | 3.10895    | 3.28005         | 0         | 1         | 1         |
| Ints3_j2         | 2.15569    | 4.80422         | 0         | 1         | 1         |
| Npr1_j2          | 0.0766554  | 0.11961         | 0.641875  | 0.321617  | 1         |
| 2500003M10Rik_j4 | 0.164972   | 0 -1.79769e+308 | 0.0006663 | 0.0103286 |           |
| 2500003M10Rik_j5 | 3.88302    | 3.53948         | -0.133643 | 0.405569  | 0.727261  |
| 2500003M10Rik_j7 | 5.10961    | 4.57653         | -0.158959 | 0.344282  | 0.684009  |
| Lce6a_j1         | 0.0596549  | 0.364986        | 2.61313   | 0.0439046 | 0.238536  |
| Lce6a_j6         | 0.0905376  | 0.616887        | 2.76842   | 0.0453757 | 0.243891  |
| Lce1f_j1         | 0.0919733  | 0.0723912       | -0.3454   | 0.80548   | 1         |
| Lce1g            | 0.0993647  | 0.22435         | 1.17494   | 0.148691  | 0.477528  |
| Tuft1_j5         | 0.32836    | 0.743501        | 0         | 1         | 1         |
| Cgn_j3           | 0.0514723  | 0.0697618       | 0         | 1         | 1         |
| Cgn_j2           | 0.00728208 | 0.0691517       | 0         | 1         | 1         |
| Zfp687_j1        | 0.13522    | 0.175653        | 0.377417  | 0.308579  | 0.653487  |

|              |             |           |              |           |          |
|--------------|-------------|-----------|--------------|-----------|----------|
| Zfp687_j2    | 0.277395    | 0.223584  | -0.311124    | 0.30294   | 0.648734 |
| Psm4_j5      | 1.11733     | 0.473985  | 0            | 1         | 1        |
| Psm4_j8      | 27.2234     | 30.3869   | 0            | 1         | 1        |
| Scnm1_j3     | 8.67632     | 9.45195   | 0.123529     | 0.340552  | 0.680526 |
| Scnm1_j2     | 1.8487      | 1.67725   | -0.140415    | 0.619635  | 0.850756 |
| Tnfaip8l2_j1 | 2.3014      | 2.86539   | 0.31622      | 0.0694029 | 0.315891 |
| Mllt11_j5    | 0           | 0.26991   | 0            | 1         | 1        |
| Bnpl_j4      | 0.0253946   | 0.0559352 | 1.13924      | 0.688163  | 1        |
| Adamts4_j1   | 1.07878     | 1.5769    | 0.547688     | 0.0585587 | 0.284356 |
| Tars2_j3     | 0.486137    | 0.57633   | 0.245532     | 0.492771  | 0.78126  |
| Tars2_j5     | 0.212918    | 0.332748  | 0.644133     | 0.115719  | 0.423274 |
| Rprd2_j1     | 1.92088     | 1.82575   | -0.0732786   | 0.599477  | 0.841292 |
| BC028528_j1  | 0.0596899   | 0.0652785 | 0.129121     | 0.945215  | 1        |
| Vps45_j4     | 0           | 0.0596396 | 1.79769e+308 | 0.197897  | 1        |
| Polr3gl_j1   | 0.971246    | 1.31596   | 0.438211     | 0.236729  | 0.583799 |
| Polr3gl_j2   | 4.36917     | 3.73133   | -0.227671    | 0.28117   | 0.629634 |
| Polr3c_j3    | 3.04754     | 4.97593   | 0            | 1         | 1        |
| Bcl9_j3      | 0           | 0.132244  | 0            | 1         | 1        |
| Bcl9_j5      | 5.91E-05    | 0.0881781 | 0            | 1         | 1        |
| Pde4dip_j7   | 0.000455047 | 0.545932  | 0            | 1         | 1        |
| Pde4dip_j8   | 2.50902     | 2.11123   | 0            | 1         | 1        |
| Phgdh_j6     | 0           | 0.506382  | 0            | 1         | 1        |
| Phgdh_j10    | 0.531876    | 0.70906   | 0            | 1         | 1        |
| Phgdh_j11    | 0.114751    | 0.247408  | 0            | 1         | 1        |
| Man1a2_j1    | 0.160635    | 0.240956  | 0            | 1         | 1        |
| Ptgfrn_j3    | 2.70901     | 2.26949   | 0            | 1         | 1        |
| XLOC_021542  | 0.0475531   | 0.0246174 | -0.949858    | 0.64577   | 1        |
| XLOC_021542  | 0.0309054   | 0.0580135 | 0.90853      | 0.609018  | 1        |
| Slc22a15_j1  | 0.423598    | 0.308343  | -0.458159    | 0.121889  | 0.434788 |
| Hipk1_j4     | 5.60263     | 7.21097   | 0            | 1         | 1        |
| Magi3_j2     | 0.621846    | 0.555654  | 0            | 1         | 1        |
| Lrig2_j3     | 0.475151    | 0.43541   | -0.126011    | 0.704972  | 0.892212 |
| Lrig2_j4     | 0           | 0.600235  | 1.79769e+308 | 4.45E-11  | 4.86E-09 |
| Mov10_j6     | 0.176674    | 0.242247  | 0            | 1         | 1        |
| Mov10_j7     | 0.0857844   | 0.0974342 | 0            | 1         | 1        |
| Capza1_j5    | 0.233709    | 0.184507  | -0.341035    | 0.726854  | 0.90322  |
| Cttnbp2nl    | 0           | 1.22554   | 0            | 1         | 1        |
| Rap1a_j5     | 0.279698    | 0.229378  | -0.286143    | 0.750755  | 0.913558 |
| Atp5f1_j1    | 34.8975     | 29.2      | 0            | 1         | 1        |
| Cept1_j2     | 4.22168     | 6.88821   | 0            | 1         | 1        |
| Csf1_j1      | 0.0517534   | 0.684095  | 0            | 1         | 1        |
| Csf1_j2      | 3.78982     | 8.09521   | 0            | 1         | 1        |
| Gstm1_j1     | 0.423503    | 0.651255  | 0.62085      | 0.183759  | 0.524378 |
| Gstm4        | 1.72987     | 1.92209   | 0.152009     | 0.613442  | 0.847579 |
| Ampd2_j5     | 1.12744     | 1.3314    | 0            | 1         | 1        |
| Ampd2        | 0.893187    | 0.669381  | 0            | 1         | 1        |
| Celsr2_j4    | 0           | 0.179662  | 1.79769e+308 | 1.05E-06  | 4.30E-05 |

|               |             |           |               |           |           |
|---------------|-------------|-----------|---------------|-----------|-----------|
| Prpf38b_j2    | 1.96207     | 1.59202   | 0             | 1         | 1         |
| Fam102b_j2    | 0.963829    | 1.85996   | 0             | 1         | 1         |
| Ntng1_j6      | 3.61315     | 2.34269   | 0             | 1         | 1         |
| Rnpc3_j1      | 0           | 0.241394  | 0             | 1         | 1         |
| Rnpc3_j9      | 0.0626682   | 0.279263  | 0             | 1         | 1         |
| Rnpc3_j11     | 0.18876     | 0.357019  | 0             | 1         | 1         |
| Rnpc3_j10     | 0.463698    | 0.983267  | 0             | 1         | 1         |
| Ccdc76_j5     | 0.173349    | 0.383534  | 1.14567       | 0.0975095 | 0.385892  |
| Hiat1_j2      | 0.841074    | 0.83546   | 0             | 1         | 1         |
| Slc35a3_j1    | 7.52494     | 6.45642   | -0.220946     | 0.0484376 | 0.253307  |
| D3Bwg0562e_j2 | 0.334555    | 0.897627  | 0             | 1         | 1         |
| D3Bwg0562e_j1 | 0.617788    | 1.9127    | 0             | 1         | 1         |
| XLOC_021623   | 0.137167    | 0.0303083 | -2.17814      | 0.0818475 | 1         |
| XLOC_021623   | 0.0401699   | 0.130015  | 1.69449       | 0.0657191 | 1         |
| Rwdd3_j4      | 0.000166184 | 0.466546  | 11.455        | 0.878932  | 0.961379  |
| Tmem56_j1     | 0.901004    | 0.944927  | 0             | 1         | 1         |
| Slc44a3_j1    | 0           | 0.0604515 | 1.79769e+308  | 0.147478  | 1         |
| Synpo2_j3     | 0.610808    | 0.559045  | -0.127755     | 0.54724   | 0.813536  |
| XLOC_021637   | 0.0171844   | 0.118826  | 2.78968       | 0.177464  | 1         |
| Ndst3_j2      | 0.326863    | 0.937056  | 0             | 1         | 1         |
| XLOC_021640   | 74.2022     | 84.0127   | 0.179146      | 0.142843  | 0.469772  |
| Ugt8a_j1      | 0           | 0.0894425 | 1.79769e+308  | 0.0012715 | 1         |
| Ank2_j1       | 32.7609     | 22.645    | 0             | 1         | 1         |
| Ank2_j3       | 0.49042     | 0.446755  | 0             | 1         | 1         |
| Ank2_j4       | 4.02113     | 3.73123   | 0             | 1         | 1         |
| Alpk1_j8      | 0.0840104   | 0.352705  | 0             | 1         | 1         |
| Alpk1_j9      | 0.0602792   | 0.143896  | 0             | 1         | 1         |
| Ap1ar_j1      | 3.58195     | 0.494025  | 0             | 1         | 1         |
| Egf_j5        | 0.100609    | 0.0853311 | -0.237612     | 0.839971  | 1         |
| Cyp2u1_j3     | 0.134561    | 0.173625  | 0.367717      | 0.546565  | 0.81304   |
| Cyp2u1_j5     | 0.0623412   | 0         | -1.79769e+308 | 0.003539  | 1         |
| Sgms2_j3      | 0.900368    | 0.799998  | 0             | 1         | 1         |
| Cisd2_j1      | 10.5804     | 9.58025   | -0.143257     | 0.234108  | 0.581507  |
| Dapp1_j2      | 0.0872023   | 0.0688013 | -0.341931     | 0.757747  | 1         |
| Dapp1_j3      | 0           | 0.0582354 | 1.79769e+308  | 0.0580144 | 1         |
| Dapp1         | 0.0778541   | 0.175211  | 1.17025       | 0.0820304 | 0.349075  |
| Mttp_j1       | 0.692951    | 0.692062  | -0.00185151   | 0.994185  | 0.998344  |
| Rap1gds1      | 14.401      | 15.904    | 0             | 1         | 1         |
| Bmpr1b_j1     | 0           | 0.119089  | 1.79769e+308  | 0.0033315 | 1         |
| Bmpr1b_j2     | 0.558974    | 0.201407  | -1.47267      | 0.0009442 | 0.0136487 |
| Bmpr1b_j3     | 0.205721    | 0.193956  | -0.084955     | 0.854082  | 0.953758  |
| Bmpr1b_j4     | 3.72E-05    | 0.189523  | 12.3132       | 0.90863   | 0.971192  |
| Pdlim5_j1     | 0.249478    | 0.221645  | 0             | 1         | 1         |
| Pdlim5        | 1.56797     | 1.46021   | 0             | 1         | 1         |
| Clca3_j1      | 0.00720503  | 0.347888  | 5.59347       | 0.294292  | 0.641033  |
| Clca3_j2      | 0.106073    | 0.275503  | 1.37701       | 0.0042142 | 0.0445322 |
| Clca5_j2      | 0.0457198   | 0.0981593 | 1.1023        | 0.394899  | 1         |

|                   |           |           |              |           |           |
|-------------------|-----------|-----------|--------------|-----------|-----------|
| Cyr61_j1          | 0.0430995 | 0.0832526 | 0.949826     | 0.471086  | 1         |
| Wdr63_j1          | 0.0464845 | 0.114773  | 1.30397      | 0.198929  | 1         |
| Lphn2_j11         | 0.385007  | 0.579272  | 0.589357     | 0.0654301 | 0.304784  |
| Lphn2_j14         | 0.439241  | 0.31032   | -0.501256    | 0.165707  | 0.50238   |
| Lphn2_j5          | 0         | 0.610362  | 1.79769e+308 | 2.01E-10  | 1.91E-08  |
| Lphn2_j15         | 0.732986  | 0.82237   | 0.166002     | 0.508963  | 0.790628  |
| Ifi44_j5          | 0         | 0.15077   | 1.79769e+308 | 0.0139258 | 1         |
| Ptgrf_j4          | 0.0679653 | 0.0961357 | 0.500275     | 0.444955  | 1         |
| Dnajb4_j4         | 5.49954   | 6.84056   | 0            | 1         | 1         |
| Ak5_j1            | 7.35789   | 7.06984   | 0            | 1         | 1         |
| Ak5_j4            | 6.65444   | 6.28554   | 0            | 1         | 1         |
| Cth               | 0.12707   | 0.382967  | 1.5916       | 0.0070271 | 0.0660538 |
| Srsf11_j5         | 1.4074    | 2.93583   | 0            | 1         | 1         |
| Lrrc7_j1          | 1.14E-05  | 0.0590275 | 12.3331      | 0.994863  | 1         |
| Gm8935            | 1.11741   | 0.958758  | -0.220921    | 0.659631  | 0.870768  |
| Raly1_j1          | 0.112931  | 0.0570947 | -0.984019    | 0.613331  | 1         |
| Raly1_j6          | 0         | 0.861561  | 1.79769e+308 | 0.001652  | 0.0214033 |
| 2610100L16Rik_j2  | 0         | 0.167935  | 1.79769e+308 | 0.0268603 | 0.172652  |
| Tbl1xr1_j5        | 4.72108   | 5.13408   | 0            | 1         | 1         |
| XLOC_020782       | 0.0922179 | 0.139585  | 0.598029     | 0.497361  | 1         |
| Tnfsf10_j3        | 0.0574427 | 0.0464662 | -0.305942    | 0.759048  | 1         |
| Pld1_j6           | 0         | 0.063702  | 1.79769e+308 | 0.0203465 | 1         |
| Tnik_j2           | 0         | 0.144843  | 0            | 1         | 1         |
| Slc2a2_j1         | 0.030534  | 0.0667281 | 1.12788      | 0.345654  | 1         |
| Rpl22l1_j2        | 0.107049  | 0.10847   | 0.0190183    | 0.988694  | 1         |
| Rpl22l1_j3        | 3.13241   | 3.07348   | -0.0274002   | 0.92954   | 0.978386  |
| Rpl22l1_j6        | 1.08307   | 1.17631   | 0.119151     | 0.835897  | 0.94731   |
| XLOC_020790       | 0.181508  | 0.176136  | -0.0433408   | 0.945261  | 0.983703  |
| Gpr160_j6         | 0.180482  | 0.142307  | -0.342843    | 0.670911  | 0.875546  |
| Gpr160_j9         | 0         | 0.0669323 | 1.79769e+308 | 0.113576  | 1         |
| Prkci_j4          | 1.15989   | 1.44737   | 0            | 1         | 1         |
| XLOC_020799       | 0.076551  | 0.104353  | 0.446983     | 0.595065  | 1         |
| Zfp639_j3         | 6.46014   | 6.85543   | 0            | 1         | 1         |
| Usp13_j1          | 5.40698   | 4.81628   | 0            | 1         | 1         |
| Usp13_j5          | 1.88668   | 1.85268   | 0            | 1         | 1         |
| Sox2ot_j2         | 0.618271  | 0.500926  | -0.303643    | 0.402833  | 0.726002  |
| Sox2ot_j7         | 0         | 0.162517  | 1.79769e+308 | 0.0044138 | 0.0463002 |
| XLOC_020811       | 0.0298622 | 0.107604  | 1.84934      | 0.211248  | 1         |
| Acad9_j1          | 7.79316   | 6.99259   | -0.156381    | 0.298208  | 0.644835  |
| 4932438A13Rik_j13 | 0.264388  | 0.497211  | 0.911204     | 0.0196629 | 0.139199  |
| 4932438A13Rik_j14 | 0         | 0.123889  | 1.79769e+308 | 0.0067886 | 1         |
| 4932438A13Rik_j15 | 6.19075   | 6.76404   | 0.127772     | 0.403252  | 0.72622   |
| Spata5_j1         | 0         | 0.0496828 | 1.79769e+308 | 0.0141899 | 1         |
| Plk4_j2           | 0.278206  | 0.376185  | 0.435286     | 0.368256  | 0.701598  |
| D3Ertd751e_j2     | 0.523227  | 0.824942  | 0            | 1         | 1         |
| Rab33b_j2         | 4.3462    | 3.04903   | 0            | 1         | 1         |
| XLOC_020844       | 0.170654  | 0.209341  | 0.294782     | 0.624395  | 0.853349  |



|             |           |           |              |           |           |
|-------------|-----------|-----------|--------------|-----------|-----------|
| Mgst2_j2    | 0         | 0.132356  | 1.79769e+308 | 0.10808   | 1         |
| Lhfp_j2     | 4.1928    | 4.41646   | 0            | 1         | 1         |
| Postn       | 0.131624  | 0.0876466 | -0.586653    | 0.548121  | 1         |
| Postn       | 0.149451  | 0.0922414 | -0.696188    | 0.464288  | 0.764619  |
| Fam48a_j5   | 1.6845    | 2.61931   | 0.636864     | 0.0037949 | 0.0413312 |
| Dclk1_j2    | 10.5613   | 8.20423   | 0            | 1         | 1         |
| Eif2a_j4    | 4.64404   | 6.73904   | 0            | 1         | 1         |
| Mbnl1_j3    | 4.21893   | 4.09427   | -0.0432685   | 0.818279  | 0.941038  |
| Mbnl1_j2    | 1.41485   | 0.798964  | -0.824444    | 0.0628835 | 0.296948  |
| Mbnl1_j8    | 0.598331  | 0.470454  | -0.346891    | 0.579555  | 0.830975  |
| XLOC_020874 | 0.0783061 | 0.191042  | 1.28669      | 0.198824  | 0.541954  |
| XLOC_020874 | 0.0645944 | 0.0653095 | 0.0158846    | 0.991257  | 1         |
| XLOC_020874 | 0.0721087 | 0.191537  | 1.40937      | 0.130162  | 0.449228  |
| XLOC_020874 | 0.0655335 | 0.0961291 | 0.55274      | 0.398522  | 1         |
| XLOC_020874 | 0         | 0.132684  | 1.79769e+308 | 0.0853233 | 1         |
| Gmps_j2     | 4.61098   | 5.55127   | 0.267743     | 0.110905  | 0.414459  |
| Kcnab1_j1   | 10.122    | 7.69752   | -0.395034    | 0.0007005 | 0.010727  |
| Tiparp_j1   | 5.83706   | 5.63397   | -0.0510888   | 0.691535  | 0.885739  |
| Lekr1_j8    | 0.120432  | 0.175857  | 0.54618      | 0.254529  | 0.602758  |
| Ptx3        | 0.128076  | 0.317552  | 1.30999      | 0.0412683 | 0.228493  |
| Rsrc1_j2    | 2.98355   | 2.77264   | -0.105771    | 0.611327  | 0.846879  |
| Smc4_j2     | 6.67001   | 7.22078   | 0            | 1         | 1         |
| XLOC_020892 | 0.215587  | 0.255883  | 0            | 1         | 1         |
| Fgg_j3      | 0.659173  | 0.32962   | -0.999851    | 0.32889   | 0.671231  |
| Lrba_j11    | 0.958925  | 0.869697  | -0.140905    | 0.570114  | 0.826154  |
| XLOC_020921 | 0.128345  | 0.228288  | 0.830831     | 0.358577  | 0.693917  |
| Arhgef11_j7 | 0.0296984 | 0.0580169 | 0            | 1         | 1         |
| Insrr_j5    | 0.578731  | 0.454423  | -0.348855    | 0.385897  | 0.714331  |
| Isg20l2_j1  | 2.43947   | 2.836     | 0.217291     | 0.246511  | 0.594158  |
| Mef2d_j2    | 7.92095   | 7.25317   | 0            | 1         | 1         |
| Cct3_j5     | 0         | 0.295776  | 1.79769e+308 | 0.005224  | 0.0524084 |
| Arhgef2_j5  | 0.535685  | 0.456019  | 0            | 1         | 1         |
| Arhgef2_j8  | 0.208972  | 1.25847   | 0            | 1         | 1         |
| Rit1        | 4.00931   | 5.52144   | 0            | 1         | 1         |
| Clk2_j7     | 4.3564    | 4.70754   | 0            | 1         | 1         |
| Pbxip1_j3   | 0.0594667 | 0.0935469 | 0.653607     | 0.481469  | 1         |
| Pmvk_j1     | 11.4265   | 13.1346   | 0.200994     | 0.261447  | 0.610687  |
| Nup210l_j8  | 0.0406718 | 0.0508522 | 0.322282     | 0.809716  | 1         |
| Dennd4b_j1  | 0.450137  | 0.238513  | -0.9163      | 0.0280854 | 0.177852  |
| S100a16     | 2.13305   | 1.59475   | 0            | 1         | 1         |
| S100a5_j1   | 3.13E-06  | 0.367067  | 16.8373      | 0.999267  | 0.999636  |
| XLOC_020978 | 0.178347  | 0.232561  | 0.382915     | 0.525923  | 0.800977  |
| S100a10_j2  | 45.2773   | 74.7117   | 0.722548     | 0.0018094 | 0.0230926 |
| S100a10_j3  | 17.1043   | 54.0539   | 1.66004      | 5.48E-08  | 3.19E-06  |
| Celf3_j4    | 0.360732  | 0.856617  | 1.24772      | 1         | 1         |
| Pogz_j6     | 0.359498  | 0.195883  | 0            | 1         | 1         |
| Pi4kb_j3    | 5.94564   | 6.39741   | 0.105657     | 0.445314  | 0.752905  |

|                   |             |           |              |           |           |
|-------------------|-------------|-----------|--------------|-----------|-----------|
| Lysmd1_j2         | 0.87482     | 0.548679  | -0.673024    | 0.0215951 | 0.148631  |
| Sema6c_j9         | 0.181584    | 0.290475  | 0            | 1         | 1         |
| Cdc42se1_j1       | 0.182944    | 0.130083  | 0            | 1         | 1         |
| Fam63a_j2         | 0.0820218   | 0.0689608 | 0            | 1         | 1         |
| Lass2_j1          | 0.0365204   | 0.474522  | 0            | 1         | 1         |
| Arnt_j5           | 2.18096     | 2.65678   | 0            | 1         | 1         |
| Otud7b_j5         | 0           | 0.30866   | 0            | 1         | 1         |
| Sf3b4_j6          | 0.360944    | 0.510047  | 0            | 1         | 1         |
| Ankrd35_j1        | 0.239122    | 0.172492  | -0.471216    | 0.418666  | 0.735429  |
| Wars2             | 0           | 0.108176  | 1.79769e+308 | 0.0004588 | 1         |
| Trim45            | 0.151791    | 0.220027  | 0.535591     | 0.272683  | 0.621524  |
| Igsf3_j1          | 0.208408    | 1.98536   | 0            | 1         | 1         |
| Nhlh2_j2          | 0           | 0.205449  | 1.79769e+308 | 0.004558  | 0.0473672 |
| Sike1_j2          | 1.27372     | 1.5336    | 0            | 1         | 1         |
| Syt6_j4           | 0.000178809 | 0.370715  | 0            | 1         | 1         |
| Phtf1_j4          | 0.0839111   | 0.128968  | 0            | 1         | 1         |
| Ppm1j_j4          | 0           | 0.624951  | 0            | 1         | 1         |
| XLOC_021076       | 0.0570172   | 0.137358  | 1.26847      | 0.529919  | 1         |
| Wdr77_j1          | 9.0087      | 9.69964   | 0            | 1         | 1         |
| Chia_j4           | 0           | 0.234342  | 1.79769e+308 | 0.0134082 | 0.106274  |
| Pma5_j4           | 1.86186     | 1.73037   | -0.10567     | 0.834881  | 0.946943  |
| Psrc1_j1          | 0           | 0.0920706 | 1.79769e+308 | 0.0429769 | 1         |
| Wdr47_j2          | 0.0697389   | 0.150487  | 0            | 1         | 1         |
| Wdr47_j9          | 3.32234     | 5.0024    | 0            | 1         | 1         |
| Vav3_j5           | 0.103283    | 0.246294  | 0            | 1         | 1         |
| XLOC_021113       | 0.0298727   | 0.0522669 | 0.807071     | 0.623732  | 1         |
| Extl2_j3          | 11.1627     | 9.68274   | 0            | 1         | 1         |
| XLOC_021118       | 0           | 0.181872  | 0            | 1         | 1         |
| XLOC_021121       | 0.0754097   | 0.285144  | 1.91887      | 0.102677  | 0.396998  |
| XLOC_021122       | 0.549485    | 0.601131  | 0            | 1         | 1         |
| Arhgap29_j5       | 0           | 0.0751426 | 0            | 1         | 1         |
| Dnttip2_j1        | 3.13778     | 3.77243   | 0.26575      | 0.191586  | 0.533749  |
| Bcar3             | 0.930758    | 0.975294  | 0            | 1         | 1         |
| Gm9364            | 0.520899    | 0.718288  | 0.46356      | 0.289537  | 0.637026  |
| Sec24d_j2         | 0.0307991   | 0.0739577 | 0            | 1         | 1         |
| Prss12_j1         | 4.24758     | 8.55555   | 1.01022      | 2.98E-08  | 1.87E-06  |
| AK029402_j1       | 0.318011    | 0.19986   | 0            | 1         | 1         |
| 4930422G04Rik_j1  | 0.0901386   | 0.0519124 | -0.796065    | 0.314318  | 1         |
| 4930422G04Rik_j12 | 0.161655    | 0.29292   | 0.857589     | 0.140254  | 0.465809  |
| 4930422G04Rik_j13 | 0.0253924   | 0.20746   | 3.03037      | 0.102276  | 0.396324  |
| Tifa_j4           | 0           | 0.119895  | 1.79769e+308 | 0.036788  | 1         |
| XLOC_021144       | 0.0259391   | 0.208187  | 3.00468      | 0.158586  | 0.492904  |
| Col25a1_j3        | 0.124537    | 0.358405  | 1.52501      | 0.0009669 | 0.0139194 |
| Col25a1_j7        | 0           | 0.0719638 | 1.79769e+308 | 0.0166978 | 1         |
| Ppa2_j1           | 0.124914    | 0.179233  | 0            | 1         | 1         |
| Ppa2_j5           | 6.82229     | 7.05911   | 0            | 1         | 1         |
| AK050464_j3       | 0           | 0.0996234 | 1.79769e+308 | 0.039406  | 1         |

|                 |            |           |              |           |           |
|-----------------|------------|-----------|--------------|-----------|-----------|
| AK050464_j2     | 0          | 0.129062  | 1.79769e+308 | 0.031681  | 1         |
| Bdh2            | 0.00362234 | 0.273761  | 6.23985      | 0.301714  | 0.648004  |
| Nhedc2_j7       | 0          | 0.0635564 | 1.79769e+308 | 0.154024  | 1         |
| Ube2d2b_j2      | 1.38916    | 1.26107   | -0.139562    | 0.524177  | 0.799783  |
| Ube2d2b_j3      | 0.251832   | 0.158832  | -0.664964    | 0.190735  | 0.533053  |
| Ube2d2b_j6      | 0.367483   | 0.517997  | 0.495267     | 0.141881  | 0.46851   |
| XLOC_021171     | 1.33E-05   | 0.0843033 | 12.63        | 0.990537  | 1         |
| Ppp3ca_j2       | 13.5123    | 20.3615   | 0            | 1         | 1         |
| Ppp3ca_j6       | 31.5777    | 25.5551   | 0            | 1         | 1         |
| XLOC_021173     | 0.154686   | 0.269373  | 0.800257     | 0.541899  | 0.809832  |
| XLOC_021173     | 0.0765824  | 0.0851461 | 0.152927     | 0.893874  | 1         |
| H2afz_j1        | 0.251273   | 0.221784  | -0.180099    | 0.869081  | 0.958391  |
| Mapksp1_j5      | 0.0810385  | 0.101619  | 0.326484     | 0.775619  | 1         |
| Mapksp1_j7      | 0.126609   | 0.10827   | -0.22575     | 0.696544  | 1         |
| Eif4e_j3        | 0.0531865  | 0.0210226 | 0            | 1         | 1         |
| XLOC_021183     | 0.192881   | 0.11178   | 0            | 1         | 1         |
| Tspan5_j5       | 1.30395    | 1.31065   | 0            | 1         | 1         |
| Gbp5_j1         | 0.164387   | 0.243038  | 0.564086     | 0.433239  | 0.744702  |
| Gbp5_j2         | 0.269277   | 0.195878  | -0.459138    | 0.407851  | 0.728232  |
| Sep15_j4        | 2.01796    | 1.14061   | 0            | 1         | 1         |
| Odf2l_j12       | 0.0470105  | 0.511057  | 3.44243      | 0.0053889 | 0.0537111 |
| Col24a1_j5      | 0.537311   | 0.131926  | 0            | 1         | 1         |
| Col24a1_j8      | 0.270186   | 0.517308  | 0            | 1         | 1         |
| Znhit6_j2       | 0.104042   | 0.023982  | -2.11714     | 0.0429947 | 1         |
| Znhit6_j1       | 0          | 0.0544161 | 1.79769e+308 | 0.0135653 | 1         |
| Mcoln2          | 0          | 0.247769  | 1.79769e+308 | 0.0013306 | 0.0179903 |
| Mcoln2_j5       | 0.081727   | 0.0954976 | 0.224651     | 0.867476  | 1         |
| Lpar3_j4        | 7.70007    | 5.98322   | -0.363949    | 0.117152  | 0.425668  |
| Fubp1_j1        | 1.38998    | 4.32763   | 0            | 1         | 1         |
| Fubp1_j2        | 1.29767    | 0.751868  | 0            | 1         | 1         |
| XLOC_021218     | 0.181061   | 0.102841  | -0.816054    | 0.491725  | 0.780573  |
| Lrriq3_j5       | 0.00559616 | 0.10155   | 4.18161      | 0.223532  | 1         |
| Pxmp3_j3        | 2.55517    | 3.18531   | 0            | 1         | 1         |
| XLOC_021239     | 0.0504363  | 0.112322  | 1.15511      | 0.267646  | 1         |
| Il7_j1          | 0          | 0.0596079 | 1.79769e+308 | 0.0960945 | 1         |
| Il7_j2          | 0.208852   | 0.207982  | -0.00602594  | 0.992182  | 0.997649  |
| XLOC_021244     | 0.172881   | 0.149247  | -0.212081    | 0.804966  | 0.935545  |
| Tpd52_j8        | 35.8092    | 33.5455   | 0            | 1         | 1         |
| Tpd52_j10       | 0          | 0.282836  | 0            | 1         | 1         |
| Pag1_j2         | 0          | 0.135438  | 0            | 1         | 1         |
| Zfand1_j2       | 0.0553444  | 0.131203  | 1.24529      | 0.245407  | 1         |
| Zfand1_j7       | 0.273196   | 0.182902  | -0.578867    | 0.507955  | 0.789986  |
| Car1_j3         | 0          | 0.08873   | 1.79769e+308 | 0.126046  | 1         |
| LOC100038947_j1 | 0          | 0.0781045 | 1.79769e+308 | 0.0523434 | 1         |
| Armc1_j1        | 5.2199     | 5.30548   | 0.0234609    | 0.888267  | 0.964649  |
| Hps3_j5         | 0          | 0.0784961 | 0            | 1         | 1         |
| Hps3            | 0.663024   | 0.853559  | 0            | 1         | 1         |

|                  |             |           |              |           |           |
|------------------|-------------|-----------|--------------|-----------|-----------|
| XLOC_021274      | 0.864991    | 1.64217   | 0.924848     | 0.0016135 | 0.0209772 |
| Nlgn1_j8         | 0.383121    | 0.063711  | -2.58819     | 0.0893857 | 0.36655   |
| Fndc3b_j4        | 0.000105457 | 0.352183  | 0            | 1         | 1         |
| Mecom_j8         | 0           | 0.0543173 | 1.79769e+308 | 0.0928509 | 1         |
| Phc3_j6          | 3.00054     | 2.67038   | 0            | 1         | 1         |
| Zmat3_j3         | 5.43753     | 8.81959   | 0            | 1         | 1         |
| Mrpl47_j1        | 0.568251    | 1.07455   | 0            | 1         | 1         |
| Pex5l_j8         | 4.33096     | 2.84015   | -0.608722    | 2.14E-05  | 0.0005858 |
| Pex5l_j7         | 2.70153     | 2.60978   | -0.0498496   | 0.747827  | 0.912276  |
| Dnajc19_j2       | 0           | 0.227725  | 0            | 1         | 1         |
| Dnajc19_j6       | 0.0731125   | 0.0868959 | 0            | 1         | 1         |
| Dcun1d1_j2       | 0           | 0.0571774 | 1.79769e+308 | 0.300225  | 1         |
| Mccc1_j6         | 0           | 0.0595484 | 1.79769e+308 | 0.0344483 | 1         |
| Qrfpr            | 0.204343    | 0.888193  | 2.11988      | 0.0027835 | 0.032434  |
| Bbs7_j2          | 1.10141     | 1.67442   | 0.604303     | 0.116192  | 0.424224  |
| Trpc3_j6         | 2.41975     | 4.43283   | 0            | 1         | 1         |
| EG381438         | 145         | 172.058   | 0.246844     | 0.0146278 | 0.112856  |
| AK012035_j4      | 0.124763    | 0.139638  | 0.162501     | 0.897415  | 1         |
| Pcdh18_j2        | 0           | 0.0584322 | 1.79769e+308 | 0.0942241 | 1         |
| Setd7_j1         | 24.7214     | 27.5292   | 0.155203     | 0.0751902 | 0.33096   |
| Nhlrc3_j1        | 0.039212    | 0.0694532 | 0.824745     | 0.381291  | 1         |
| Frem2_j2         | 0.292805    | 0.609614  | 1.05795      | 0.0019983 | 0.0249359 |
| Nbea_j6          | 0.241721    | 0.194142  | -0.31623     | 0.537341  | 0.807503  |
| Commd2_j1        | 8.46578     | 9.07723   | 0.10061      | 0.53831   | 0.807888  |
| Pfn2_j1          | 177.973     | 176.504   | 0            | 1         | 1         |
| XLOC_021350      | 0.0279577   | 0.226336  | 3.01715      | 0.131095  | 0.450672  |
| Gpr149_j3        | 0.000154285 | 0.629202  | 0            | 1         | 1         |
| Plch1_j2         | 0.05842     | 0.112183  | 0.941317     | 0.2911    | 1         |
| Ccnl1_j2         | 1.76351     | 1.87181   | 0.0859881    | 0.655501  | 0.868365  |
| Ccnl1_j3         | 0           | 0.0521096 | 1.79769e+308 | 0.123604  | 1         |
| Ccnl1_j4         | 0.795009    | 1.59691   | 1.00624      | 0.0003077 | 0.0054588 |
| Ccnl1_j11        | 0.69449     | 0.712566  | 0.0370701    | 0.871563  | 0.959237  |
| Rapgef2          | 1.92023     | 1.66733   | 0            | 1         | 1         |
| Rapgef2_j4       | 0.645228    | 0.634434  | -0.0243405   | 1         | 1         |
| Rxfp1_j3         | 0           | 0.0985924 | 1.79769e+308 | 0.0201275 | 1         |
| Gria2_j3         | 0.205583    | 0.168808  | -0.284336    | 0.577961  | 0.83012   |
| Gria2_j10        | 0.363031    | 0.186396  | -0.96172     | 0.0229365 | 0.154827  |
| Glr3_j3          | 0           | 0.119779  | 0            | 1         | 1         |
| D930015E06Rik_j2 | 0           | 0.0531014 | 1.79769e+308 | 0.0328728 | 1         |
| Mnd1_j2          | 0.20994     | 0.317775  | 0.598029     | 0.572109  | 0.827134  |
| Arfp1_j5         | 0.345076    | 0.759311  | 0            | 1         | 1         |
| Rps3a_j6         | 0.108874    | 0.161367  | 0.567684     | 0.451635  | 0.75674   |
| Dclk2_j4         | 0.00173619  | 0.888425  | 0            | 1         | 1         |
| Kirrel_j4        | 0.0816182   | 0.311     | 0            | 1         | 1         |
| Pear1_j6         | 1.19321     | 0.954767  | 0            | 1         | 1         |
| Pear1_j9         | 0.667548    | 0.729227  | 0            | 1         | 1         |
| Pear1_j8         | 0.174443    | 0.534111  | 0            | 1         | 1         |

|             |           |           |            |           |           |
|-------------|-----------|-----------|------------|-----------|-----------|
| Pear1_j7    | 0.507679  | 0.655563  | 0          | 1         | 1         |
| Prcc_j3     | 13.0475   | 16.43     | 0.332558   | 0.0916366 | 0.371989  |
| Prcc_j5     | 3.85242   | 7.88048   | 1.03252    | 3.84E-06  | 0.0001348 |
| BC023814_j4 | 1.97543   | 1.96228   | 0          | 1         | 1         |
| Bcan_j1     | 6.25303   | 5.59357   | 0          | 1         | 1         |
| Apoa1bp_j1  | 14.4905   | 13.0136   | 0          | 1         | 1         |
| Sema4a_j1   | 0.365378  | 1.33675   | 0          | 1         | 1         |
| Sema4a_j2   | 0.876634  | 0.299491  | 0          | 1         | 1         |
| Syt11_j8    | 39.8351   | 44.7344   | 0          | 1         | 1         |
| Dap3_j3     | 24.4326   | 25.8954   | 0.0838889  | 0.460133  | 0.761714  |
| Rusc1_j6    | 0.261319  | 0.46235   | 0          | 1         | 1         |
| Rusc1_j7    | 4.23716   | 5.97627   | 0          | 1         | 1         |
| Fdps_j1     | 0.756023  | 0.417331  | -0.857237  | 0.0605028 | 0.290023  |
| Adam15_j5   | 7.40263   | 9.25323   | 0          | 1         | 1         |
| Chrn2_j3    | 1.6564    | 2.10788   | 0.347745   | 0.0331906 | 0.198764  |
| Chrn2_j4    | 4.34726   | 2.58681   | -0.748933  | 1.90E-08  | 1.26E-06  |
| Il6ra_j1    | 1.57E-05  | 0.162906  | 13.3429    | 0.964622  | 0.989999  |
| Atp8b2_j7   | 4.55557   | 5.39385   | 0          | 1         | 1         |
| Ubp2l_j1    | 2.12244   | 2.46761   | 0          | 1         | 1         |
| Ubp2l_j6    | 2.67114   | 3.26614   | 0          | 1         | 1         |
| Creb3l4_j1  | 0.0856598 | 0.143661  | 0.745973   | 0.39361   | 1         |
| Npr1_j6     | 0.0295745 | 0.157636  | 2.41417    | 0.207125  | 0.551651  |
| Npr1_j7     | 0.376551  | 0.287738  | -0.388087  | 0.277949  | 0.626763  |
| XLOC_021476 | 0.0717775 | 0.220205  | 1.61724    | 0.278341  | 0.627262  |
| Lor_j1      | 0.0999745 | 0.3028    | 1.59873    | 0.039947  | 0.223616  |
| Lelp1_j1    | 0.121986  | 0.416479  | 1.77152    | 0.0002452 | 0.0045452 |
| Lce1f       | 0.0746522 | 0.183023  | 1.29377    | 0.40333   | 0.726254  |
| Snx27_j1    | 10.535    | 9.87228   | 0          | 1         | 1         |
| Cgn_j1      | 0.563212  | 0.232832  | 0          | 1         | 1         |
| Psm4_j1     | 94.4109   | 101.219   | 0          | 1         | 1         |
| Zfp687_j3   | 0.131384  | 0.210671  | 0.681203   | 0.110578  | 0.413852  |
| Pip5k1a_j1  | 2.56592   | 2.97483   | 0          | 1         | 1         |
| Gabpb2_j1   | 0.116816  | 0.272794  | 0          | 1         | 1         |
| Bnip1_j1    | 0.0569294 | 0.0965118 | 0.761531   | 0.525785  | 1         |
| Prune_j1    | 7.54408   | 8.02215   | 0          | 1         | 1         |
| Anxa9_j3    | 0.0888054 | 0.109912  | 0.307624   | 0.733314  | 1         |
| Anxa9_j4    | 0.105908  | 0.161103  | 0.605173   | 0.400011  | 0.723563  |
| Setdb1_j1   | 0.94836   | 1.19421   | 0          | 1         | 1         |
| Setdb1_j4   | 2.22844   | 2.33076   | 0          | 1         | 1         |
| Adamts4_j4  | 0.406498  | 0.389635  | -0.0611262 | 0.868901  | 0.958389  |
| Tars2_j2    | 0.356463  | 0.388817  | 0.125337   | 0.58333   | 0.833121  |
| Tars2_j1    | 0.0881447 | 0.0678475 | -0.377579  | 0.410501  | 1         |
| Plekho1_j2  | 8.21058   | 12.2887   | 0          | 1         | 1         |
| Vps45_j1    | 3.38868   | 3.28278   | -0.0458038 | 0.878219  | 0.96104   |
| Bola1_j1    | 8.70158   | 8.51885   | -0.0306193 | 0.871114  | 0.959006  |
| XLOC_021517 | 0.282959  | 0.481435  | 0.766747   | 0.0269455 | 0.173063  |
| Bcl9_j2     | 0         | 0.0765138 | 0          | 1         | 1         |

|                  |            |           |              |           |           |
|------------------|------------|-----------|--------------|-----------|-----------|
| Pde4dip_j3       | 9.21134    | 9.56325   | 0            | 1         | 1         |
| Man1a2_j2        | 10.5781    | 9.27256   | 0            | 1         | 1         |
| Ptgrn_j1         | 0          | 0.194146  | 0            | 1         | 1         |
| Atp1a1_j3        | 318.95     | 312.106   | 0            | 1         | 1         |
| Hipk1_j5         | 1.16146    | 3.17401   | 0            | 1         | 1         |
| Magi3_j3         | 8.63818    | 9.56599   | 0            | 1         | 1         |
| Fam19a3_j3       | 2.15369    | 2.66032   | 0            | 1         | 1         |
| Mov10_j5         | 0.257703   | 0.206446  | 0            | 1         | 1         |
| Mov10            | 0          | 0.211516  | 0            | 1         | 1         |
| Rap1a_j3         | 0.00279438 | 0.103896  | 5.21647      | 0.0283581 | 1         |
| Atp5f1_j3        | 1.80271    | 1.35831   | 0            | 1         | 1         |
| Atp5f1_j5        | 0.161519   | 0.0840436 | 0            | 1         | 1         |
| Cept1_j3         | 4.27604    | 4.19225   | 0            | 1         | 1         |
| Slc6a17_j1       | 28.4317    | 22.6105   | 0            | 1         | 1         |
| Fam40a_j1        | 0          | 1.39722   | 1.79769e+308 | 3.21E-07  | 1.50E-05  |
| Ahcyl1_j1        | 19.1687    | 20.7433   | 0            | 1         | 1         |
| Csf1_j4          | 2.73887    | 9.28971   | 0            | 1         | 1         |
| 4933431E20Rik_j1 | 0.321304   | 0.374039  | 0.219249     | 0.549619  | 0.814872  |
| Gnai3_j1         | 0          | 0.144708  | 0            | 1         | 1         |
| Cyb561d1_j2      | 3.6895     | 4.09145   | 0            | 1         | 1         |
| Atxn7l2_j5       | 1.30844    | 1.15437   | 0            | 1         | 1         |
| Stxbp3a_j2       | 0          | 0.414591  | 1.79769e+308 | 0.0046141 | 0.0477981 |
| Prpf38b_j1       | 0          | 0.0863701 | 0            | 1         | 1         |
| Fam102b_j1       | 20.6124    | 23.4917   | 0            | 1         | 1         |
| Ntng1_j5         | 0          | 0.369253  | 0            | 1         | 1         |
| Rnpc3_j5         | 0          | 0.111221  | 0            | 1         | 1         |
| XLOC_021601      | 0.0265401  | 0.167955  | 2.66183      | 0.267766  | 0.616423  |
| Ccdc76_j6        | 0.491773   | 0.356129  | -0.465594    | 0.485099  | 0.776871  |
| XLOC_021619      | 0.0782468  | 0.236417  | 1.59523      | 0.0955514 | 0.381587  |
| XLOC_021623      | 0.0583742  | 0.0910897 | 0.641956     | 0.520721  | 1         |
| Tmem56_j2        | 6.20225    | 3.51669   | 0            | 1         | 1         |
| Fnbp1l_j6        | 0          | 0.109578  | 0            | 1         | 1         |
| Usp53_j6         | 0.378212   | 0.349117  | -0.115483    | 0.743746  | 0.910328  |
| XLOC_021640      | 63.8654    | 71.3531   | 0.15994      | 0.360963  | 0.69571   |
| Ank2_j3          | 28.3357    | 54.4781   | 0            | 1         | 1         |
| Ank2_j11         | 19.6514    | 21.3718   | 0            | 1         | 1         |
| Larp7_j1         | 0          | 0.194554  | 1.79769e+308 | 0.0083672 | 0.075018  |
| Ap1ar_j7         | 5.26055    | 11.3498   | 0            | 1         | 1         |
| Ap1ar_j8         | 0          | 0.644594  | 0            | 1         | 1         |
| Enpep_j1         | 0.569293   | 0.731542  | 0.361771     | 0.206646  | 0.551278  |
| Egf_j6           | 0.0616897  | 0.12903   | 1.0646       | 0.35021   | 1         |
| Gar1_j3          | 0.0658124  | 0.0631837 | -0.0588078   | 0.972631  | 1         |
| Sec24b_j1        | 3.98774    | 6.51836   | 0            | 1         | 1         |
| Rpl34_j1         | 0.106104   | 0.179781  | 0.760771     | 0.265276  | 0.614091  |
| Npnt_j1          | 0.0167416  | 0.0895214 | 2.4188       | 0.0986811 | 1         |
| Tet2_j2          | 0.0771519  | 0.25109   | 0            | 1         | 1         |
| Bank1_j3         | 0.274406   | 0.238458  | -0.202576    | 0.833344  | 0.946329  |

|                  |             |           |              |           |           |
|------------------|-------------|-----------|--------------|-----------|-----------|
| Mttp             | 0.269347    | 0.372961  | 0.469561     | 0.196328  | 0.539086  |
| Rap1gds1_j2      | 17.5579     | 29.9117   | 0            | 1         | 1         |
| Pkn2_j2          | 0           | 0.0917256 | 1.79769e+308 | 0.003938  | 1         |
| Clca1_j1         | 0.0913917   | 0.128706  | 0.493948     | 0.596472  | 1         |
| Wdr63_j3         | 0.0324538   | 0.0504139 | 0.635434     | 0.736212  | 1         |
| Lphn2_j4         | 0.337199    | 0.309152  | -0.125283    | 0.737571  | 0.907523  |
| Ptgfr_j5         | 3.48085     | 2.64627   | -0.395477    | 0.0013471 | 0.0181634 |
| Dnajb4_j1        | 0           | 0.351539  | 0            | 1         | 1         |
| Dnajb4_j3        | 3.98079     | 3.09435   | 0            | 1         | 1         |
| St6galnac5_j2    | 0.0375635   | 0.0589672 | 0            | 1         | 1         |
| Acadm_j2         | 11.5298     | 11.9355   | 0.0498957    | 0.763237  | 0.918454  |
| Pkia_j2          | 0           | 1.19191   | 0            | 1         | 1         |
| XLOC_020750      | 0.0783356   | 0.132855  | 0.762113     | 0.467005  | 1         |
| Raly1_j4         | 0           | 0.268035  | 1.79769e+308 | 0.0220003 | 0.150539  |
| AK020793_j1      | 0.0631644   | 0.173538  | 1.45807      | 0.201683  | 0.545292  |
| Dnajc5b_j3       | 0           | 0.0687328 | 1.79769e+308 | 0.0835417 | 1         |
| Hltf_j2          | 0.481015    | 0.575197  | 0.257973     | 1         | 1         |
| Hltf_j5          | 0           | 0.171312  | 1.79769e+308 | 0.0032025 | 0.0363258 |
| Hltf_j8          | 1.33066     | 1.33366   | 0.00325369   | 0.993305  | 0.997985  |
| XLOC_020778      | 0.0904105   | 0.188428  | 1.05945      | 0.329478  | 0.671707  |
| Tbl1xr1_j1       | 0.000175939 | 0.16851   | 0            | 1         | 1         |
| XLOC_020782      | 0.0189363   | 0.174787  | 3.20637      | 0.102419  | 0.396457  |
| XLOC_020782      | 0.067868    | 0.124407  | 0.874262     | 0.336218  | 1         |
| Plid1_j9         | 0           | 0.103366  | 1.79769e+308 | 0.0296691 | 1         |
| Plid1_j10        | 0.385673    | 0.158203  | -1.2856      | 0.0804302 | 0.344996  |
| Tnik_j4          | 0.0224246   | 0.0574342 | 0            | 1         | 1         |
| Egfm1_j9         | 0           | 0.0976444 | 1.79769e+308 | 0.049059  | 1         |
| Gpr160_j10       | 0           | 0.135782  | 1.79769e+308 | 0.0361514 | 1         |
| Pik3ca_j2        | 0.861966    | 0.78774   | -0.129912    | 0.56682   | 0.824722  |
| Mfn1_j1          | 5.13785     | 4.69094   | 0            | 1         | 1         |
| Ndufb5_j2        | 2.2815      | 2.41709   | 0            | 1         | 1         |
| Ttc14_j1         | 0.482848    | 0.0961303 | -2.3285      | 4.72E-08  | 2.80E-06  |
| Ttc14_j3         | 0.699023    | 0.577203  | -0.27626     | 0.236602  | 0.583799  |
| Fxr1_j1          | 6.60598     | 6.85141   | 0            | 1         | 1         |
| Fxr1_j2          | 2.19134     | 6.79667   | 0            | 1         | 1         |
| Atp11b_j1        | 0.524806    | 0.675056  | 0.363223     | 0.370018  | 0.703535  |
| A330050B17Rik_j1 | 0.410439    | 0.44299   | 0.110107     | 0.849543  | 0.952228  |
| Plk4_j1          | 0.703371    | 0.478125  | -0.556899    | 0.125835  | 0.441688  |
| Plk4_j3          | 0.00013648  | 0.161745  | 10.2108      | 0.850178  | 0.952363  |
| Plk4_j5          | 0.286091    | 0.347977  | 0.282519     | 0.589007  | 0.835956  |
| 3110057O12Rik    | 0.377381    | 0.376487  | -0.00342278  | 0.9944    | 0.998387  |
| 3110057O12Rik_j1 | 0.0606843   | 0.0676382 | 0.156515     | 0.91327   | 1         |
| Larp1b_j1        | 0.266451    | 0.344131  | 0.369084     | 0.431975  | 0.74396   |
| Larp1b_j2        | 0.508557    | 0.525407  | 0.0470262    | 0.923339  | 0.97612   |
| D3Erttd751e_j1   | 0           | 0.0861629 | 0            | 1         | 1         |
| Trpc4_j6         | 0.411696    | 0.241952  | -0.766856    | 0.0985628 | 0.388048  |
| XLOC_020851      | 0.284678    | 0.194604  | -0.548786    | 0.360808  | 0.695583  |

|                  |           |           |              |           |           |
|------------------|-----------|-----------|--------------|-----------|-----------|
| Postn_j2         | 1.57287   | 1.50596   | -0.0627119   | 0.822361  | 0.942695  |
| Fam48a_j3        | 0.617479  | 0.829582  | 0.425994     | 0.237035  | 0.583799  |
| Eif2a_j3         | 0.203594  | 2.00583   | 0            | 1         | 1         |
| Med12l_j5        | 0.643211  | 0.325634  | -0.982042    | 8.02E-05  | 0.0017771 |
| Med12l           | 0.640733  | 0.604468  | -0.0840573   | 0.679966  | 0.879611  |
| Med12l_j12       | 0.647124  | 0.744733  | 0.20268      | 0.457341  | 0.760373  |
| Mbnl1_j4         | 1.05286   | 1.50692   | 0.517291     | 0.193267  | 0.535585  |
| Mbnl1_j11        | 8.41509   | 8.11867   | -0.0517365   | 0.791632  | 0.930476  |
| XLOC_020873      | 0.0795932 | 0.159687  | 1.00453      | 0.261761  | 0.610917  |
| XLOC_020874      | 0.160648  | 0.535409  | 1.73674      | 0.0501098 | 0.258665  |
| Mme_j3           | 0         | 0.345655  | 0            | 1         | 1         |
| Lekr1_j2         | 0.0800984 | 0.187026  | 1.2234       | 0.420838  | 0.736999  |
| Lekr1_j4         | 0.0373199 | 0.139437  | 1.9016       | 0.298407  | 1         |
| Ptx3_j2          | 0         | 0.482591  | 1.79769e+308 | 1.91E-05  | 0.0005348 |
| Iqcj-schip1_j3   | 2.73293   | 6.97177   | 1.35108      | 3.59E-06  | 0.0001265 |
| Otol1_j2         | 0         | 0.09505   | 1.79769e+308 | 0.109976  | 1         |
| Ppid             | 5.69124   | 5.79323   | 0.0256249    | 0.86991   | 0.958673  |
| 4930579G24Rik_j1 | 0.404683  | 0.482008  | 0.252265     | 0.592829  | 0.8379    |
| Fam198b_j2       | 0.196156  | 0.257275  | 0            | 1         | 1         |
| Ctso_j1          | 0         | 0.600775  | 1.79769e+308 | 5.87E-05  | 0.0013639 |
| Fbxw7_j2         | 0.692833  | 4.78655   | 0            | 1         | 1         |
| Sh3d19_j4        | 1.55807   | 2.24098   | 0            | 1         | 1         |
| Lrba_j7          | 0.45123   | 0.520646  | 0.20644      | 0.382947  | 0.712835  |
| Lrba_j13         | 0.663184  | 0.385387  | -0.783102    | 0.218053  | 0.564432  |
| XLOC_020921      | 0.448647  | 0.564305  | 0.330894     | 0.688185  | 0.884104  |
| Arhgef11_j8      | 1.4709    | 5.03701   | 0            | 1         | 1         |
| Arhgef11_j9      | 1.97603   | 1.3842    | 0            | 1         | 1         |
| Hdgf_j4          | 46.6505   | 43.1095   | 0            | 1         | 1         |
| Iqgap3_j5        | 0.271629  | 0.252307  | -0.106456    | 0.878739  | 0.961284  |
| XLOC_020931      | 0.097879  | 0.105204  | 0.104112     | 0.903066  | 1         |
| Cct3_j1          | 0.652611  | 0.683867  | 0.0674921    | 0.894744  | 0.966783  |
| Cct3_j3          | 0         | 0.130679  | 1.79769e+308 | 0.0350547 | 1         |
| Cct3_j2          | 0         | 0.267655  | 1.79769e+308 | 0.0034897 | 0.0388507 |
| 0610031J06Rik_j1 | 11.4673   | 13.6413   | 0            | 1         | 1         |
| Smg5_j1          | 4.43677   | 4.42627   | 0            | 1         | 1         |
| Paqr6_j3         | 5.24412   | 5.06761   | 0            | 1         | 1         |
| Ubqln4_j2        | 9.85873   | 11.5045   | 0            | 1         | 1         |
| Clk2_j4          | 0.187038  | 0.340047  | 0            | 1         | 1         |
| Clk2_j3          | 0.299933  | 0.185192  | 0            | 1         | 1         |
| Gba_j2           | 3.86287   | 3.15834   | 0            | 1         | 1         |
| Shc1_j7          | 2.92862   | 1.01474   | -1.52911     | 3.78E-10  | 3.40E-08  |
| Shc1_j6          | 0.759326  | 0.415046  | -0.871449    | 0.023268  | 0.156304  |
| 4933434E20Rik_j2 | 5.95281   | 8.36139   | 0            | 1         | 1         |
| 4933434E20Rik_j3 | 0         | 0.0849068 | 0            | 1         | 1         |
| Tpm3_j1          | 2.12678   | 2.39108   | 0.16899      | 0.459226  | 0.761406  |
| Tpm3_j3          | 2.24953   | 2.78222   | 0.306612     | 0.129709  | 0.448649  |
| Tpm3_j5          | 0.649279  | 1.31657   | 1.01987      | 0.0013244 | 0.0179197 |



|                  |           |           |              |           |           |
|------------------|-----------|-----------|--------------|-----------|-----------|
| Nup210l_j10      | 0.05022   | 0.116682  | 1.21625      | 0.0863089 | 1         |
| Crtc2_j1         | 11.1922   | 11.5356   | 0.0436072    | 0.743721  | 0.910328  |
| S100a13_j4       | 120.609   | 146.773   | 0.283248     | 0.0039701 | 0.042668  |
| S100a3_j4        | 0         | 0.112355  | 1.79769e+308 | 0.0444605 | 1         |
| S100a3_j5        | 0.0707915 | 0.117155  | 0.726777     | 0.603258  | 1         |
| S100a7a_j1       | 0.396949  | 0.621331  | 0.64641      | 0.131399  | 0.451294  |
| S100a7a          | 0.455702  | 0.516786  | 0.181477     | 0.641052  | 0.861567  |
| Sprr2g           | 0.103875  | 0.253021  | 1.2844       | 0.277958  | 0.626763  |
| Celf3_j2         | 0.0713753 | 0.0720129 | 0            | 1         | 1         |
| Celf3_j5         | 0.06875   | 0.145101  | 0            | 1         | 1         |
| Celf3_j6         | 0.0145709 | 0.369165  | 0            | 1         | 1         |
| Pogz_j2          | 0.054754  | 0.067601  | 0            | 1         | 1         |
| Tmod4_j2         | 0.0316879 | 0.0853745 | 1.42987      | 0.204183  | 1         |
| Sema6c_j4        | 0.0711155 | 0.598712  | 0            | 1         | 1         |
| Fam63a_j5        | 9.49063   | 10.0175   | 0            | 1         | 1         |
| Lass2_j3         | 2.04638   | 1.59809   | 0            | 1         | 1         |
| Arnt             | 0.384669  | 0.317664  | 0            | 1         | 1         |
| Aph1a_j8         | 0.0375708 | 0.0541546 | 0.527471     | 0.643046  | 1         |
| Otud7b_j10       | 2.92464   | 4.68176   | 0            | 1         | 1         |
| Mtmr11_j2        | 0.628955  | 0.524122  | -0.263054    | 0.465407  | 0.765323  |
| Sf3b4_j2         | 0.20168   | 1.08366   | 0            | 1         | 1         |
| Sf3b4_j3         | 5.4339    | 5.66193   | 0            | 1         | 1         |
| Sv2a_j1          | 1.53656   | 1.90457   | 0            | 1         | 1         |
| Fmo5_j3          | 0.0174711 | 1.24901   | 6.15967      | 2.75E-05  | 0.0007185 |
| Fmo5             | 2.3443    | 1.26472   | -0.890346    | 0.0004089 | 0.0068925 |
| Csde1_j1         | 0.586777  | 0.812194  | 0            | 1         | 1         |
| Ptpn22_j7        | 0         | 0.0686662 | 1.79769e+308 | 0.071426  | 1         |
| Phtf1_j8         | 0.0154979 | 0.221255  | 0            | 1         | 1         |
| Phtf1_j7         | 3.42289   | 2.74083   | 0            | 1         | 1         |
| XLOC_021071      | 0.0378884 | 0.115069  | 1.60268      | 0.271275  | 1         |
| XLOC_021076      | 0         | 0.171113  | 1.79769e+308 | 0.0008389 | 0.0124502 |
| XLOC_021078      | 0.0975513 | 0.0638066 | -0.612456    | 0.559663  | 1         |
| Dennd2d_j1       | 0.0169733 | 0.133591  | 2.97648      | 0.314814  | 1         |
| Kcna2_j1         | 0.251611  | 0.175099  | 0            | 1         | 1         |
| Kcna2_j2         | 0.156033  | 0.314505  | 0            | 1         | 1         |
| Slc16a4_j3       | 0.067851  | 0.0978069 | 0.527566     | 0.637948  | 1         |
| Psm5_j2          | 0.879229  | 1.15229   | 0.390197     | 0.188827  | 0.530536  |
| Psrc1            | 0         | 0.12238   | 1.79769e+308 | 0.0337629 | 1         |
| Taf13            | 0.0144996 | 0.0577363 | 1.99347      | 0.306914  | 1         |
| Vav3_j3          | 1.6473    | 2.14172   | 0            | 1         | 1         |
| Col11a1_j5       | 1.87134   | 1.61497   | 0            | 1         | 1         |
| Col11a1_j6       | 0.0606998 | 0.118602  | 0            | 1         | 1         |
| Extl2_j2         | 0         | 0.10489   | 0            | 1         | 1         |
| AK076759_j1      | 0.32444   | 0.230306  | 0            | 1         | 1         |
| Alg14_j1         | 12.1152   | 11.972    | 0            | 1         | 1         |
| Camk2d_j1        | 25.9712   | 32.9053   | 0            | 1         | 1         |
| 4930422G04Rik_j7 | 0.0259188 | 0.0466745 | 0.848637     | 0.536592  | 1         |

|                   |             |            |               |           |           |
|-------------------|-------------|------------|---------------|-----------|-----------|
| XLOC_021146       | 0.178702    | 0.187544   | 0.0696772     | 0.920314  | 0.975019  |
| Lef1_j1           | 0.295891    | 0.391603   | 0.404326      | 0.30111   | 0.64749   |
| Cenpe_j3          | 0           | 0.0487492  | 1.79769e+308  | 0.0820877 | 1         |
| Cenpe_j2          | 0.0479615   | 0          | -1.79769e+308 | 0.050764  | 1         |
| Nhedc2_j6         | 0           | 0.0524841  | 1.79769e+308  | 0.171572  | 1         |
| Ube2d2b_j4        | 14.6451     | 11.7489    | -0.317895     | 0.003366  | 0.0377322 |
| Manba_j2          | 0.10015     | 0.173      | 0.788607      | 0.245764  | 0.593119  |
| XLOC_021173       | 0.653436    | 0.394085   | -0.729539     | 0.384716  | 0.713387  |
| Ddit4l_j1         | 0.0187231   | 0.062921   | 1.74872       | 0.369734  | 1         |
| Mapksp1_j4        | 0.440246    | 0.445387   | 0.0167524     | 0.972966  | 0.992104  |
| Rg9mtd2_j3        | 0.208201    | 0.244781   | 0             | 1         | 1         |
| Eif4e_j2          | 1.22334     | 2.3617     | 0             | 1         | 1         |
| Eif4e_j6          | 0.432339    | 0.80681    | 0             | 1         | 1         |
| Tspan5_j6         | 0.550741    | 0.35886    | 0             | 1         | 1         |
| Gbp3              | 0.707418    | 0.610484   | 0             | 1         | 1         |
| Odf2l_j6          | 0.660832    | 0.424492   | -0.638546     | 0.184483  | 0.524945  |
| Odf2l_j11         | 0.0700287   | 0.173264   | 1.30696       | 0.238148  | 0.585036  |
| Col24a1_j3        | 0.18236     | 0.962478   | 0             | 1         | 1         |
| Znhit6            | 3.23659     | 3.7333     | 0.205976      | 0.400496  | 0.723924  |
| Ddah1_j1          | 0.151327    | 0.801055   | 0             | 1         | 1         |
| Lpar3_j5          | 0.384568    | 0.412746   | 0.102014      | 0.842935  | 0.950311  |
| Ssx2ip            | 4.78038     | 6.00892    | 0             | 1         | 1         |
| Ssx2ip_j3         | 1.55508     | 1.00055    | 0             | 1         | 1         |
| Fubp1_j6          | 0.0409392   | 0.47696    | 0             | 1         | 1         |
| 4922501L14Rik_j10 | 1.30554     | 1.15519    | -0.17652      | 1         | 1         |
| 4922501L14Rik_j9  | 0.00034914  | 0.164165   | 0             | 1         | 1         |
| Zranb2_j1         | 10.8741     | 8.72837    | -0.317113     | 0.0332609 | 0.199014  |
| Ankrd13c          | 0.4465      | 0.793273   | 0.829156      | 0.0317259 | 0.192861  |
| Pxmp3_j4          | 1.95102     | 1.75562    | 0             | 1         | 1         |
| Pxmp3             | 0.280873    | 0.880619   | 0             | 1         | 1         |
| XLOC_021244       | 0.018349    | 0.0921309  | 2.32799       | 0.334217  | 1         |
| Tpd52_j4          | 21.0276     | 22.5328    | 0             | 1         | 1         |
| Tpd52_j5          | 39.58       | 22.7212    | 0             | 1         | 1         |
| Zfp704_j1         | 0.0795827   | 0.173189   | 1.12182       | 0.527355  | 0.801527  |
| Pag1_j3           | 2.66851     | 2.60956    | 0             | 1         | 1         |
| Car1_j2           | 0.191479    | 1.16728    | 2.60789       | 0.0004871 | 0.0079703 |
| Pde7a_j3          | 0.327728    | 0.509095   | 0.635435      | 0.0535228 | 0.269378  |
| Hps3_j2           | 4.02468     | 4.53214    | 0             | 1         | 1         |
| Hps3_j3           | 0.207004    | 0.193862   | 0             | 1         | 1         |
| Gyg_j2            | 0           | 0.305618   | 0             | 1         | 1         |
| Gyg_j3            | 28.5243     | 23.4517    | 0             | 1         | 1         |
| Cpa3              | 0.180757    | 0.339561   | 0.909621      | 0.101038  | 0.393603  |
| Cpb1_j9           | 0.000338097 | 0.305505   | 9.81954       | 0.722859  | 0.901299  |
| Cpb1_j8           | 0.153741    | 0.00663587 | -4.53407      | 0.21093   | 0.555649  |
| XLOC_021272       | 0.187343    | 0.558342   | 1.57547       | 0.0204814 | 0.143252  |
| AK080657_j1       | 0.0335064   | 0.125354   | 1.9035        | 0.182716  | 1         |
| XLOC_021273       | 0.0347406   | 0.148925   | 2.0999        | 0.0235301 | 1         |

|                  |            |           |              |           |           |
|------------------|------------|-----------|--------------|-----------|-----------|
| XLOC_021273      | 0.00116449 | 0.244884  | 7.71626      | 0.807388  | 0.936475  |
| Nlgn1_j2         | 0.0555298  | 0.0545226 | -0.0264089   | 0.984266  | 1         |
| Lrrc31_j6        | 0.0784218  | 0.0853085 | 0.121436     | 0.874321  | 1         |
| Lrrc31_j5        | 0          | 0.172831  | 1.79769e+308 | 0.0004247 | 0.0071077 |
| Phc3_j5          | 0.150045   | 0.254955  | 0            | 1         | 1         |
| Mrpl47_j2        | 2.99227    | 2.51095   | 0            | 1         | 1         |
| Ccdc39_j16       | 0.355567   | 0.42701   | 0.264146     | 0.366831  | 0.700361  |
| Dnajc19_j4       | 2.29429    | 2.5831    | 0            | 1         | 1         |
| RP24-396D16.1_j2 | 0.187314   | 0.271667  | 0.536378     | 0.468086  | 0.766788  |
| Mccc1_j7         | 0.741318   | 0.640471  | -0.210959    | 0.58013   | 0.831409  |
| Anxa5_j1         | 173.979    | 163.791   | 0            | 1         | 1         |
| Anxa5_j2         | 0.0688263  | 42.2915   | 0            | 1         | 1         |
| Anxa5_j6         | 102.119    | 125.238   | 0            | 1         | 1         |
| Bbs7_j1          | 0.845555   | 0.870541  | 0.0420141    | 0.913652  | 0.972914  |
| Trpc3_j5         | 2.23147    | 2.17486   | 0            | 1         | 1         |
| XLOC_021309      | 0.280595   | 0.272792  | 0            | 1         | 1         |
| Ankrd50_j4       | 1.64375    | 2.50419   | 0            | 1         | 1         |
| Mfsd8_j2         | 0.270956   | 1.2662    | 0            | 1         | 1         |
| AK012035_j3      | 0.624458   | 0.575674  | -0.117354    | 0.770695  | 0.922052  |
| AK012035_j6      | 0.0788486  | 0.054878  | -0.522857    | 0.833641  | 1         |
| AK012035_j5      | 0.0784272  | 0.0538216 | -0.543169    | 0.795751  | 1         |
| Pcdh18_j1        | 1.72919    | 1.5076    | -0.197843    | 0.445558  | 0.753013  |
| Elf2_j4          | 0          | 0.224625  | 0            | 1         | 1         |
| Elf2_j6          | 0.210468   | 0.841442  | 0            | 1         | 1         |
| Elf2_j5          | 0.00709594 | 0.424914  | 0            | 1         | 1         |
| Maml3_j2         | 0.139122   | 0.179718  | 0            | 1         | 1         |
| Frem2_j5         | 0.163634   | 0.0869138 | -0.912817    | 0.456789  | 0.760049  |
| Frem2_j7         | 0          | 0.0611748 | 1.79769e+308 | 0.0668627 | 1         |
| Nbea_j1          | 0.406832   | 0.584306  | 0            | 1         | 1         |
| Nbea_j2          | 0.69756    | 1.27878   | 0            | 1         | 1         |
| Tm4sf1_j2        | 1.51234    | 2.84888   | 0.913607     | 0.0001032 | 0.0022146 |
| P2ry12_j3        | 0          | 0.162531  | 0            | 1         | 1         |
| Slc33a1_j1       | 4.37705    | 4.15836   | -0.0739437   | 0.737896  | 0.907728  |
| Ssr3_j3          | 7.8099     | 8.4795    | 0            | 1         | 1         |
| Ccnl1_j9         | 0          | 0.460408  | 1.79769e+308 | 0.0014125 | 0.0188209 |
| Ccnl1_j10        | 0.140106   | 0.2087    | 0.574915     | 0.217409  | 0.563545  |
| Shox2_j2         | 4.11205    | 3.11767   | 0            | 1         | 1         |
| XLOC_021380      | 0.235971   | 0.342201  | 0.536236     | 0.647923  | 0.864358  |
| Trim59_j1        | 0          | 0.175524  | 1.79769e+308 | 0.0031094 | 0.0354341 |
| Pdcd10_j3        | 0.103257   | 0.188288  | 0.866702     | 0.262617  | 0.611643  |
| Rapgef2_j2       | 0.709911   | 0.363287  | -0.96653     | 0.334968  | 0.675691  |
| Fnip2_j5         | 0          | 0.0682489 | 0            | 1         | 1         |
| Fnip2_j6         | 0          | 0.239749  | 0            | 1         | 1         |
| Gria2            | 0.241022   | 0.407234  | 0.756695     | 0.0303192 | 0.186992  |
| Tlr2_j1          | 0.138893   | 0.203838  | 0.553446     | 0.411566  | 0.73074   |
| Trim2_j5         | 10.6749    | 13.2461   | 0            | 1         | 1         |
| Fhdc1_j2         | 1.85275    | 1.73086   | 0            | 1         | 1         |

|             |           |           |              |           |           |
|-------------|-----------|-----------|--------------|-----------|-----------|
| Rps3a_j3    | 0         | 0.180196  | 1.79769e+308 | 0.0015922 | 0.0207562 |
| Pear1_j3    | 0.209107  | 0.427491  |              | 0         | 1         |
| Pear1_j4    | 0         | 0.0499182 |              | 0         | 1         |
| Ntrk1_j1    | 25.3164   | 26.6645   |              | 0         | 1         |
| Bcan_j7     | 0         | 0.755123  |              | 0         | 1         |
| Slc25a44    | 2.03491   | 1.70451   |              | 0         | 1         |
| Sema4a_j3   | 0.394557  | 0.519317  |              | 0         | 1         |
| Sema4a_j4   | 0.163914  | 0.251717  |              | 0         | 1         |
| Syt11_j2    | 37.6263   | 23.8136   |              | 0         | 1         |
| Dap3        | 11.4184   | 10.8523   | -0.0733659   | 0.618683  | 0.850216  |
| Rusc1_j4    | 0.282484  | 0.838379  | 0            | 1         | 1         |
| Fdps_j14    | 0.567524  | 0.254525  | -1.15687     | 0.100525  | 0.392504  |
| Fdps_j13    | 1.6969    | 1.11669   | -0.603672    | 0.0928482 | 0.374785  |
| Mtx1_j1     | 0.510319  | 0.674563  | 0            | 1         | 1         |
| Trim46      | 1.77782   | 3.57989   | 0            | 1         | 1         |
| Adam15_j4   | 11.1647   | 14.6301   | 0            | 1         | 1         |
| Adam15_j8   | 14.8503   | 16.8323   | 0            | 1         | 1         |
| Atp8b2_j8   | 0.0188824 | 0.094128  | 0            | 1         | 1         |
| Atp8b2_j9   | 0         | 0.146261  | 0            | 1         | 1         |
| Ubp2l_j2    | 4.62      | 4.46307   | 0            | 1         | 1         |
| Ints3_j3    | 0.458199  | 0.496497  | 0            | 1         | 1         |
| Npr1_j9     | 0.155404  | 0.233439  | 0.587019     | 0.289732  | 0.637061  |
| Zfp687_j5   | 0.847692  | 0.525874  | -0.688823    | 0.0069924 | 0.0658037 |
| Psm4_j6     | 8.2445    | 10.1799   | 0            | 1         | 1         |
| Pip5k1a_j3  | 0         | 0.113299  | 0            | 1         | 1         |
| Pip5k1a_j5  | 0.456869  | 1.00823   | 0            | 1         | 1         |
| Scnm1_j1    | 0.345447  | 0.266532  | -0.374156    | 0.567111  | 0.82484   |
| Gabpb2_j2   | 0.124984  | 0.102761  | 0            | 1         | 1         |
| Bnip1_j2    | 0.10805   | 0.203681  | 0.914609     | 0.281029  | 0.629591  |
| Anxa9_j1    | 0.327999  | 0.434377  | 0            | 1         | 1         |
| Setdb1_j2   | 3.24015   | 2.95378   | 0            | 1         | 1         |
| Adamts14_j3 | 0.0478631 | 0.152214  | 1.66911      | 0.050474  | 1         |
| Tars2_j11   | 0.212465  | 0.104202  | -1.02784     | 0.0927165 | 0.37475   |
| Tars2_j9    | 0.440679  | 0.789458  | 0.841134     | 0.0049699 | 0.0504971 |
| Tars2_j10   | 0.426076  | 0.394284  | -0.111875    | 0.752022  | 0.914258  |
| Tars2_j12   | 0         | 0.0847547 | 1.79769e+308 | 0.0085755 | 1         |
| Prpf3_j2    | 0.0681045 | 0.294655  | 2.11321      | 0.007301  | 0.0680375 |
| Gm129_j1    | 0.026262  | 0.149259  | 2.50677      | 0.253364  | 1         |
| Vps45_j3    | 6.05364   | 7.29235   | 0.26858      | 0.144543  | 0.471765  |
| Nudt17_j1   | 1.54933   | 3.35726   | 1.11564      | 1.99E-07  | 9.84E-06  |
| Pde4dip_j5  | 0.654496  | 0.107517  | 0            | 1         | 1         |
| Pde4dip_j4  | 4.06421   | 4.13536   | 0            | 1         | 1         |
| Pde4dip_j6  | 1.22449   | 0.911645  | 0            | 1         | 1         |
| Pde4dip_j12 | 13.2566   | 14.5212   | 0            | 1         | 1         |
| Phgdh_j1    | 0         | 0.291089  | 0            | 1         | 1         |
| Wdr3_j1     | 0.503299  | 1.09533   | 1.12188      | 0.017843  | 0.130129  |
| XLOC_021542 | 0.141144  | 0.242248  | 0.779312     | 0.537918  | 0.807831  |

|                  |            |           |              |           |          |
|------------------|------------|-----------|--------------|-----------|----------|
| Vangl1_j2        | 0          | 0.11861   | 0            | 1         | 1        |
| Magi3_j1         | 10.075     | 8.18841   | 0            | 1         | 1        |
| Lrig2_j6         | 1.47526    | 1.61979   | 0.134829     | 0.483476  | 0.77601  |
| Fam19a3_j2       | 1.82154    | 0.87116   | 0            | 1         | 1        |
| Mov10_j8         | 0.00114085 | 0.0485831 | 0            | 1         | 1        |
| Capza1_j1        | 0.701026   | 0.720392  | 0.0393159    | 0.898849  | 0.967647 |
| AK018929_j1      | 0.261582   | 0.297146  | 0.18391      | 0.842993  | 0.950311 |
| Atp5f1_j2        | 80.9266    | 78.8893   | 0            | 1         | 1        |
| Cept1_j1         | 18.3059    | 14.8127   | 0            | 1         | 1        |
| Fam40a_j4        | 0.558001   | 0.484877  | -0.202647    | 0.708548  | 0.893803 |
| Csf1_j5          | 0          | 0.497012  | 0            | 1         | 1        |
| Ampd2_j7         | 0.107921   | 0.950415  | 0            | 1         | 1        |
| Gnai3_j3         | 6.82619    | 8.85761   | 0            | 1         | 1        |
| Gnai3_j4         | 0.0413695  | 0.105977  | 0            | 1         | 1        |
| Atxn7l2_j6       | 0.693781   | 0.885953  | 0            | 1         | 1        |
| Celsr2_j3        | 0.117661   | 0.0917705 | -0.358528    | 0.45641   | 1        |
| 5330417C22Rik_j2 | 0          | 0.0791314 | 1.79769e+308 | 0.006516  | 1        |
| Amy1             | 1.08946    | 2.81087   | 0            | 1         | 1        |
| Slc30a7_j1       | 0.145167   | 0.374592  | 0            | 1         | 1        |
| Hiat1_j3         | 2.77071    | 5.88683   | 0            | 1         | 1        |
| Slc35a3_j4       | 1.1421     | 0.617394  | -0.887421    | 0.132797  | 0.453607 |
| Slc35a3_j5       | 0.105843   | 0.507455  | 2.26136      | 0.0309589 | 0.189737 |
| Agl_j4           | 0          | 0.142342  | 0            | 1         | 1        |
| Agl_j5           | 3.27245    | 2.97059   | 0            | 1         | 1        |
| Palmd_j6         | 0.874204   | 1.15568   | 0            | 1         | 1        |
| Ptbp2_j4         | 7.52355    | 9.25496   | 0            | 1         | 1        |
| Rwdd3_j1         | 0.543596   | 0.323952  | -0.746755    | 0.214469  | 0.559858 |
| Abcd3_j3         | 0.0506357  | 0.142586  | 0            | 1         | 1        |
| Fnbp1l_j1        | 0.262665   | 0.225785  | 0            | 1         | 1        |
| Usp53_j3         | 0.643038   | 0.711639  | 0.146241     | 0.62786   | 0.855023 |
| Ndst3_j1         | 0.349086   | 0.356681  | 0            | 1         | 1        |
| Ugt8a_j2         | 2.12756    | 2.80487   | 0.398736     | 0.02649   | 0.171062 |
| Ank2_j2          | 30.3667    | 23.1421   | 0            | 1         | 1        |
| Ank2_j5          | 0.133093   | 0.0378547 | 0            | 1         | 1        |
| Ank2_j1          | 0.86144    | 0.785914  | -0.132378    | 0.619043  | 0.85046  |
| Alpk1_j3         | 1.02845    | 0.557324  | 0            | 1         | 1        |
| Alpk1_j5         | 0.101778   | 0.191055  | 0            | 1         | 1        |
| Alpk1_j4         | 0.0374715  | 0.113152  | 0            | 1         | 1        |
| Ap1ar            | 3.21939    | 4.84517   | 0            | 1         | 1        |
| Ap1ar_j3         | 0.013133   | 0.186601  | 0            | 1         | 1        |
| Sec24b_j3        | 1.30041    | 0.174591  | 0            | 1         | 1        |
| Rpl34_j3         | 0.331534   | 0.173863  | -0.931202    | 0.48012   | 0.77397  |
| XLOC_021663      | 0.159828   | 0.195554  | 0            | 1         | 1        |
| Tet2_j3          | 0.262696   | 0.542495  | 0            | 1         | 1        |
| AK034519_j1      | 0          | 0.117363  | 1.79769e+308 | 0.0033184 | 1        |
| Nfkb1            | 1.45723    | 2.0938    | 0.52289      | 0.0417539 | 0.230484 |
| Bank1_j2         | 0          | 0.049499  | 1.79769e+308 | 0.0992719 | 1        |

|                   |            |                 |              |           |           |
|-------------------|------------|-----------------|--------------|-----------|-----------|
| Bmpr1b_j5         | 0          | 0.0738575       | 1.79769e+308 | 0.0157194 | 1         |
| Pdlim5_j7         | 0.909315   | 0.60642         | 0            | 1         | 1         |
| Pkn2_j1           | 0.0926541  | 0.0493729       | -0.908136    | 0.40781   | 1         |
| Hs2st1_j2         | 0          | 0.292612        | 1.79769e+308 | 6.65E-06  | 0.0002175 |
| Sh3glb1_j4        | 4.46727    | 4.96106         | 0            | 1         | 1         |
| Cyr61_j2          | 0.240645   | 0.307337        | 0.352918     | 0.646765  | 0.863884  |
| Cyr61_j3          | 0.11305    | 0.228573        | 1.01569      | 0.145303  | 0.473206  |
| Wdr63_j2          | 0          | 0.120472        | 1.79769e+308 | 0.0074099 | 1         |
| Spata1_j3         | 0          | 0.455931        | 1.79769e+308 | 1.53E-05  | 0.0004447 |
| Lphn2_j12         | 0.481332   | 0.286667        | -0.747657    | 0.0453672 | 0.243872  |
| Lphn2_j13         | 0.105249   | 0.199556        | 0.922987     | 0.0596794 | 0.287448  |
| AK077587          | 0.363628   | 0.419144        | 0            | 1         | 1         |
| Nexn_j1           | 3.80412    | 4.03961         | 0            | 1         | 1         |
| Fam73a_j2         | 1.10739    | 1.45352         | 0            | 1         | 1         |
| Rabggtb           | 0.487339   | 1.0318          | 1.08216      | 0.0237141 | 0.158361  |
| Tyw3_j1           | 0.357215   | 0.548163        | 0.617812     | 0.0785039 | 0.339794  |
| Srsf11_j3         | 1.17118    | 1.59172         | 0            | 1         | 1         |
| Lrrc7_j3          | 0.00564875 | 0.161379        | 4.83637      | 0.366397  | 0.700164  |
| AI838599_j4       | 0.10894    | 0.0156564       | -2.79871     | 0.289891  | 1         |
| Tgs1              | 1.90139    | 2.38024         | 0            | 1         | 1         |
| Lyn               | 0.889231   | 1.07393         | 0.272276     | 0.246169  | 0.593752  |
| Lyn               | 0.499858   | 0.577947        | 0.209419     | 0.520781  | 0.797932  |
| Chchd7_j5         | 0.0900799  | 0               | 0            | 1         | 1         |
| Fam110b_j1        | 0.960156   | 0.927864        | 0            | 1         | 1         |
| Fam110b           | 0.876252   | 0.963861        | 0            | 1         | 1         |
| Fam110b           | 0.0459543  | 0.0719972       | 0            | 1         | 1         |
| Ubxn2b            | 2.52685    | 2.40578         | -0.0708331   | 0.583166  | 0.833121  |
| Sdcbp_j5          | 1.55074    | 0.197287        | 0            | 1         | 1         |
| Rab2a             | 22.7101    | 21.2944         | 0            | 1         | 1         |
| Chd7              | 0.151401   | 0.0892769       | -0.762018    | 0.366102  | 0.700015  |
| Chd7_j3           | 0.0885506  | 0.0215513       | -2.03873     | 0.0239862 | 1         |
| Clvs1             | 6.28618    | 5.38618         | 0            | 1         | 1         |
| 4930412C18Rik_j7  | 0.0356732  | 0.0611889       | 0.778427     | 0.419118  | 1         |
| 4930412C18Rik_j6  | 0.0593761  | 0.0444414       | -0.417978    | 0.668522  | 1         |
| 4930412C18Rik_j5  | 0.0855414  | 0.0356076       | -1.26444     | 0.202069  | 1         |
| 4930412C18Rik_j13 | 0.0797369  | 0.053222        | -0.583224    | 0.498071  | 1         |
| 2610301B20Rik     | 6.11971    | 5.57155         | 0            | 1         | 1         |
| 2610301B20Rik_j1  | 3.66099    | 1.6102          | 0            | 1         | 1         |
| Gm11828           | 5.10756    | 5.75175         | 0.171368     | 0.431273  | 0.743572  |
| Trp53inp1         | 0.602447   | 0.624834        | 0            | 1         | 1         |
| Trp53inp1         | 1.79381    | 1.57541         | 0            | 1         | 1         |
| 1110037F02Rik     | 4.80173    | 4.60983         | -0.0588418   | 0.595081  | 0.838618  |
| Gem_j1            | 0.0695142  | 0 -1.79769e+308 | 0.0277625    | 0.0277625 | 1         |
| Gem               | 0.896317   | 0.780908        | -0.198855    | 0.432859  | 0.744519  |
| AK005538          | 0.243738   | 0.313945        | 0            | 1         | 1         |
| AK007255_j1       | 0.267683   | 0.133677        | 0            | 1         | 1         |
| XLOC_022711       | 0.184566   | 0.162952        | 0            | 1         | 1         |

|               |           |                 |            |           |           |
|---------------|-----------|-----------------|------------|-----------|-----------|
| XLOC_022711   | 0.18811   | 0.108566        | 0          | 1         | 1         |
| XLOC_022713   | 0.0766445 | 0 -1.79769e+308 | 0.137946   |           | 1         |
| Gm11818       | 4.11821   | 3.18625         | 0          | 1         | 1         |
| Gm11818       | 2.96816   | 2.87344         | 0          | 1         | 1         |
| Runx1t1_j1    | 0.446465  | 0.0496759       | 0          | 1         | 1         |
| Runx1t1       | 0.491941  | 0.766877        | 0          | 1         | 1         |
| Runx1t1_j2    | 1.19958   | 0.284642        | 0          | 1         | 1         |
| Tmem55a       | 35.7334   | 32.7486         | -0.125839  | 0.170595  | 0.507473  |
| Tmem64        | 12.5705   | 9.8842          | -0.346842  | 0.0005968 | 0.0094446 |
| Calb1         | 8.46449   | 6.11106         | -0.470002  | 3.89E-05  | 0.0009635 |
| Nbn           | 6.37395   | 7.02149         | 0.139589   | 0.243746  | 0.591067  |
| AK171183      | 0.560451  | 0.533927        | -0.0699452 | 0.871341  | 0.959126  |
| AK080160_j3   | 0.0779544 | 0.0418665       | -0.896834  | 0.552356  | 1         |
| AK080160_j2   | 0.350462  | 0.247906        | -0.499465  | 0.534702  | 0.805843  |
| mt3-mmp_j1    | 1.31615   | 3.44131         | 0          | 1         | 1         |
| Fam82b        | 0.931342  | 0.935579        | 0.00654862 | 0.971849  | 0.991962  |
| Fam82b_j1     | 4.2414    | 3.69432         | -0.19923   | 0.100314  | 0.391964  |
| Ttpa_j2       | 0.564548  | 0.418018        | -0.433531  | 0.428651  | 0.742474  |
| Ggh           | 9.96941   | 10.6432         | 0.0943524  | 0.497396  | 0.783786  |
| Ccnc_j1       | 0.323991  | 0.0583686       | 0          | 1         | 1         |
| Usp45         | 1.48156   | 0.16204         | 0          | 1         | 1         |
| Usp45         | 6.20684   | 4.89703         | 0          | 1         | 1         |
| Sfrs18_j2     | 3.8571    | 3.99661         | 0          | 1         | 1         |
| Sfrs18_j8     | 1.44242   | 1.369           | 0          | 1         | 1         |
| Sfrs18_j9     | 4.063     | 3.55743         | 0          | 1         | 1         |
| 6230409E13Rik | 0         | 0.105047        | 0          | 1         | 1         |
| 6230409E13Rik | 0.728113  | 0.142392        | 0          | 1         | 1         |
| XLOC_022734   | 0.135193  | 0.106206        | 0          | 1         | 1         |
| Fbxl4_j1      | 1.4461    | 1.19252         | 0          | 1         | 1         |
| Fbxl4         | 0.996225  | 0.770533        | 0          | 1         | 1         |
| F730047E07Rik | 0.371415  | 0.31396         | -0.24245   | 0.651211  | 0.866096  |
| Mms22l_j4     | 0.0749934 | 0.0682631       | -0.135659  | 0.910341  | 1         |
| Mms22l_j5     | 0.0851051 | 0 -1.79769e+308 | 0.0180627  |           | 1         |
| Ndufaf4       | 6.48204   | 7.03864         | 0.11885    | 0.294127  | 0.640961  |
| Epha7         | 0.477613  | 0.378724        | -0.334696  | 0.36889   | 0.702119  |
| Epha7         | 0.222307  | 0.121857        | -0.867363  | 0.0608207 | 0.29079   |
| Map3k7_j2     | 1.59747   | 1.27656         | 0          | 1         | 1         |
| Map3k7_j5     | 2.43532   | 2.67497         | 0          | 1         | 1         |
| XLOC_022743   | 0.229835  | 0.120728        | -0.928843  | 0.141031  | 0.467017  |
| Casp8ap2      | 1.16009   | 5.72E-05        | 0          | 1         | 1         |
| Lymr2         | 11.1659   | 11.6355         | 0.0594311  | 0.626392  | 0.854124  |
| Rragd         | 7.83759   | 6.70243         | 0          | 1         | 1         |
| Ube2j1        | 38.1396   | 38.6197         | 0          | 1         | 1         |
| Ube2j1_j1     | 34.6433   | 31.207          | 0          | 1         | 1         |
| Srsf13b_j3    | 2.02149   | 1.33359         | 0          | 1         | 1         |
| Srsf13b_j1    | 1.04564   | 0.607041        | 0          | 1         | 1         |
| Rngtt         | 5.25598   | 5.34929         | 0.0253886  | 0.83405   | 0.946622  |

|               |           |                 |            |           |           |
|---------------|-----------|-----------------|------------|-----------|-----------|
| Cnr1_j3       | 0.60503   | 0.0843854       | -2.84194   | 9.45E-06  | 0.0002961 |
| Cnr1          | 1.95569   | 1.36023         | -0.523822  | 0.0064657 | 0.0619602 |
| Cnr1_j5       | 0.786466  | 0.519042        | -0.599534  | 0.0531134 | 0.268178  |
| Akirin2_j1    | 40.6488   | 47.433          | 0.222678   | 0.0505109 | 0.26013   |
| Akirin2       | 2.59999   | 2.67244         | 0.0396513  | 0.708809  | 0.893906  |
| Rars2         | 6.79679   | 6.91947         | 0.0258071  | 0.84076   | 0.94973   |
| Aco1          | 1.11699   | 1.12768         | 0.0137434  | 0.936028  | 0.980349  |
| Chmp5         | 23.9809   | 23.8727         | 0          | 1         | 1         |
| Nfx1          | 2.81955   | 2.49933         | 0          | 1         | 1         |
| Nfx1          | 1.95722   | 1.51146         | 0          | 1         | 1         |
| Ube2r2        | 47.2554   | 50.0436         | 0.0827076  | 0.360766  | 0.695583  |
| Ubap1         | 9.1846    | 9.74591         | 0.0855812  | 0.396031  | 0.720998  |
| Nudt2         | 6.99594   | 7.71101         | 0          | 1         | 1         |
| Nudt2_j4      | 1.15748   | 0.49088         | 0          | 1         | 1         |
| Ccl21b_j1     | 0.0866359 | 0 -1.79769e+308 |            | 0.131562  | 1         |
| Gm2506_j2     | 1.30613   | 1.33063         | 0.0268081  | 0.952167  | 0.986165  |
| N28178_j1     | 4.00897   | 2.0754          | 0          | 1         | 1         |
| N28178_j10    | 1.31027   | 2.22692         | 0          | 1         | 1         |
| N28178_j9     | 0.761589  | 0.434203        | 0          | 1         | 1         |
| N28178_j8     | 6.19148   | 4.87974         | 0          | 1         | 1         |
| N28178_j13    | 10.5376   | 8.45045         | 0          | 1         | 1         |
| Dnajb5        | 8.08271   | 10.0951         | 0.320743   | 0.0076039 | 0.0700847 |
| Unc13b_j4     | 0.605981  | 0.392291        | -0.627348  | 0.0347348 | 0.204691  |
| Unc13b_j3     | 0.191569  | 0.575392        | 1.58668    | 1.64E-06  | 6.34E-05  |
| Unc13b_j6     | 0.142625  | 0.0965244       | -0.563259  | 0.416738  | 0.733896  |
| Unc13b_j12    | 0.434724  | 0.25451         | -0.77238   | 0.103887  | 0.399846  |
| Unc13b_j15    | 0.503715  | 0.685341        | 0.444215   | 0.297941  | 0.644572  |
| Atp8b5_j2     | 0.148498  | 0.147033        | -0.0142983 | 0.986676  | 0.99622   |
| Atp8b5_j3     | 0.0637771 | 0.11541         | 0.855652   | 0.517067  | 1         |
| Atp8b5_j8     | 0.203448  | 0.105186        | -0.951716  | 0.201803  | 0.545319  |
| Atp8b5_j9     | 0.0858125 | 0 -1.79769e+308 |            | 0.0014166 | 1         |
| Rusc2_j5      | 1.33966   | 0.950001        | 0          | 1         | 1         |
| Rusc2_j7      | 3.03996   | 0.936793        | 0          | 1         | 1         |
| Rusc2_j12     | 1.08258   | 2.04391         | 0          | 1         | 1         |
| Tesk1         | 14.0494   | 13.1866         | -0.0914372 | 0.416461  | 0.733896  |
| Ccdc107       | 18.1231   | 18.8283         | 0.0550788  | 0.684804  | 0.882239  |
| XLOC_022796   | 0.0762103 | 3.08E-06        | -14.5965   | 0.997178  | 1         |
| XLOC_022796   | 0.218283  | 0.288187        | 0.400808   | 0.376503  | 0.708503  |
| Npr2_j1       | 4.20312   | 6.16995         | 0          | 1         | 1         |
| Npr2_j2       | 0.354877  | 0.249969        | 0          | 1         | 1         |
| Npr2_j3       | 1.18195   | 0.81764         | 0          | 1         | 1         |
| 5430416O09Rik | 0.30926   | 0.226919        | -0.44664   | 0.431699  | 0.743752  |
| Reck_j2       | 0.248175  | 0.377659        | 0.605725   | 0.129572  | 0.448468  |
| Reck_j1       | 0.186871  | 3.34E-05        | -12.4511   | 0.937068  | 0.980727  |
| Reck          | 0.569075  | 0.338031        | -0.751464  | 0.0381003 | 0.216941  |
| Reck_j6       | 0.308815  | 0.237136        | -0.381027  | 0.46968   | 0.76771   |
| Glipr2        | 5.27348   | 7.23247         | 0.455733   | 0.0008195 | 0.0122013 |



|                  |           |                       |             |           |           |
|------------------|-----------|-----------------------|-------------|-----------|-----------|
| Clta             | 23.3629   | 21.4067               | 0           | 1         | 1         |
| Clta             | 5.9583    | 4.99117               | 0           | 1         | 1         |
| Zcchc7           | 4.33502   | 4.32892               | -0.00203284 | 0.985626  | 0.995707  |
| Grhpr            | 5.6658    | 5.40428               | -0.0681776  | 0.68067   | 0.879921  |
| Polr1e           | 0.941858  | 0.928018              | -0.0213556  | 0.935302  | 0.980235  |
| Frmpd1_j1        | 0.264516  | 0.146886              | 0           | 1         | 1         |
| Frmpd1_j2        | 2.8166    | 2.16022               | 0           | 1         | 1         |
| Rg9mtd3          | 0.144978  | 0.133503              | -0.118961   | 0.793469  | 0.931169  |
| Wdr32            | 0.50524   | 0.495313              | 0           | 1         | 1         |
| Dcaf10           | 2.99646   | 2.41158               | 0           | 1         | 1         |
| AK044089         | 0.359938  | 0.123629              | -1.54173    | 0.116397  | 0.424447  |
| Aldh1b1          | 1.86725   | 1.8471                | -0.0156538  | 0.933915  | 0.979958  |
| Tdrd7            | 20.4781   | 18.4442               | -0.150915   | 0.109818  | 0.412338  |
| Tdrd7_j2         | 0.707173  | 0.232118              | -1.60721    | 0.0008557 | 0.012621  |
| Tmod1_j3         | 0.070681  | 0 -1.79769e+308       | 0.0681223   | 0.0681223 | 1         |
| Ncbp1            | 8.27313   | 8.15865               | -0.0201041  | 0.849819  | 0.952228  |
| Anp32b_j1        | 0.119774  | 0 -1.79769e+308       | 0.0428903   | 0.0428903 | 1         |
| Nans             | 10.1938   | 10.9283               | 0.100373    | 0.41106   | 0.730561  |
| Galnt12_j6       | 0.0620849 | 0.0685029             | 0.141922    | 0.925378  | 1         |
| Col15a1_j1       | 1.06922   | 0.7004                | -0.610312   | 0.0303272 | 0.187018  |
| Col15a1          | 2.81674   | 4.06841               | 0.530441    | 6.58E-05  | 0.0015071 |
| Tgfbr1           | 1.02868   | 1.00025               | -0.0404251  | 0.86052   | 0.955855  |
| Tgfbr1           | 0.637082  | 0.911883              | 0.51737     | 0.0421396 | 0.231999  |
| Sec61b           | 8.57785   | 10.5577               | 0.299614    | 0.105757  | 0.403811  |
| XLOC_022831      | 0.220526  | 0.214376              | -0.0408035  | 0.957592  | 0.987942  |
| XLOC_022832      | 0.456415  | 0.649036              | 0.507951    | 0.0754304 | 0.331468  |
| Nr4a3            | 0.149091  | 0.155341              | 0.059238    | 0.921387  | 0.975363  |
| Stx17            | 0.858184  | 1.57042               | 0           | 1         | 1         |
| Stx17_j2         | 2.16303   | 1.34148               | 0           | 1         | 1         |
| 5730528L13Rik    | 0.860066  | 0.513727              | 0           | 1         | 1         |
| 5730528L13Rik    | 0.224102  | 0.172067              | 0           | 1         | 1         |
| 5730528L13Rik_j2 | 1.49644   | 1.5355                | 0           | 1         | 1         |
| Tmeff1_j3        | 0.538627  | 0.43003               | 0           | 1         | 1         |
| Tmeff1           | 7.79238   | 7.21209               | 0           | 1         | 1         |
| E130309F12Rik_j1 | 0.171719  | 0.090303              | -0.927207   | 0.359655  | 0.69491   |
| Zfp189           | 1.40292   | 1.44372               | 0.0413509   | 0.798779  | 0.933125  |
| Rnf20            | 0.297964  | 0.164876              | 0           | 1         | 1         |
| Rnf20_j4         | 6.39161   | 5.8672                | 0           | 1         | 1         |
| Smc2             | 0.200751  | 1.22E-05              | -14.0075    | 0.967861  | 0.990963  |
| Smc2             | 0         | 0.154668 1.79769e+308 | 0.0002179   | 0.0002179 | 1         |
| Nipsnap3a_j1     | 16.6424   | 21.9271               | 0.397857    | 0.0114161 | 0.0945277 |
| Nipsnap3b        | 9.92564   | 11.3905               | 0.1986      | 0.10443   | 0.400973  |
| Slc44a1          | 34.4267   | 31.0582               | 0           | 1         | 1         |
| Slc44a1_j3       | 16.7328   | 17.4914               | 0           | 1         | 1         |
| Slc44a1_j5       | 32.9714   | 38.2967               | 0           | 1         | 1         |
| Fsd1l_j1         | 4.43854   | 3.36385               | 0           | 1         | 1         |
| Fsd1l_j2         | 2.02068   | 1.60899               | 0           | 1         | 1         |

|                  |           |                 |             |           |           |
|------------------|-----------|-----------------|-------------|-----------|-----------|
| Fktn             | 1.3343    | 1.4606          | 0           | 1         | 1         |
| Fktn_j3          | 0.676868  | 0.371594        | 0           | 1         | 1         |
| Fktn_j5          | 0.97948   | 0.515768        | 0           | 1         | 1         |
| Tmem38b          | 2.52404   | 2.36683         | -0.0927801  | 0.580276  | 0.831506  |
| Zfp462           | 0.326522  | 0.261292        | 0           | 1         | 1         |
| Zfp462_j4        | 0.0961766 | 0.075214        | 0           | 1         | 1         |
| XLOC_022856      | 0.140283  | 0.0923353       | -0.603391   | 0.55554   | 0.818323  |
| Rad23b           | 29.6664   | 27.8318         | 0           | 1         | 1         |
| BC026590         | 2.51644   | 2.30426         | -0.12708    | 0.37418   | 0.706986  |
| XLOC_022860      | 0.147874  | 0.0590728       | -1.3238     | 0.274634  | 0.623754  |
| Gm12530_j2       | 0.14505   | 0.0779992       | -0.895014   | 0.411539  | 0.730729  |
| Palm2_j1         | 2.66698   | 2.21551         | -0.267568   | 0.0707159 | 0.319662  |
| Palm2_j4         | 0.649454  | 0 -1.79769e+308 |             | 7.77E-14  | 1.31E-11  |
| Musk_j1          | 0.674613  | 0.508279        | -0.408439   | 0.540241  | 0.808768  |
| Dnajc25          | 0.507323  | 0.312718        | -0.698044   | 0.0527575 | 0.266888  |
| Gng10            | 14.2347   | 16.5727         | 0.219396    | 0.099914  | 0.39147   |
| Ugcg             | 20.0552   | 18.4771         | 0           | 1         | 1         |
| Hsd12            | 13.0493   | 10.4735         | -0.317227   | 0.0098752 | 0.0849295 |
| Hsd12_j1         | 18.6582   | 17.2995         | -0.109081   | 0.383186  | 0.712878  |
| E130308A19Rik    | 0.140022  | 0.115484        | -0.277961   | 0.652986  | 0.867224  |
| E130308A19Rik    | 0.427841  | 0.284212        | -0.590105   | 0.11142   | 0.415473  |
| E130308A19Rik_j1 | 0.0865609 | 0 -1.79769e+308 |             | 0.001424  | 1         |
| XLOC_022870      | 0.355804  | 0.354451        | -0.00549643 | 0.984393  | 0.995386  |
| Snx30            | 1.07475   | 1.50493         | 0.485697    | 0.0009179 | 0.0133511 |
| Gm12543          | 29.1234   | 31.3703         | 0.107218    | 0.384468  | 0.713264  |
| Slc31a2          | 2.29601   | 3.08616         | 0           | 1         | 1         |
| Slc31a1          | 11.9391   | 11.6734         | -0.032478   | 0.749853  | 0.913026  |
| Prpf4            | 0.87334   | 0.76406         | -0.192858   | 0.285957  | 0.63471   |
| Prpf4_j1         | 2.79542   | 2.48531         | -0.169644   | 0.256567  | 0.605481  |
| Bspry_j2         | 0.167883  | 7.22E-05        | -11.1829    | 0.984269  | 0.995386  |
| Rgs3_j1          | 0.667354  | 0.684909        | 0.0374594   | 0.854129  | 0.953758  |
| Rgs3_j2          | 0.217933  | 0.186359        | -0.225798   | 0.509869  | 0.790859  |
| Zfp618_j3        | 0.11672   | 0.0941394       | -0.310184   | 0.742492  | 1         |
| Zfp618_j8        | 9.53E-05  | 0.407987        | 12.0645     | 0.648085  | 0.864393  |
| Col27a1_j7       | 0.94682   | 0.993822        | 0.0698971   | 0.724798  | 0.902137  |
| Atp6v1g1         | 18.735    | 20.1847         | 0.10753     | 0.262448  | 0.611555  |
| 6330416G13Rik_j8 | 0.249601  | 0.123112        | 0           | 1         | 1         |
| Pappa_j4         | 0.103177  | 3.08E-05        | 0           | 1         | 1         |
| Pappa_j3         | 0.189309  | 0.202969        | 0           | 1         | 1         |
| Trim32           | 7.28757   | 6.20364         | 0           | 1         | 1         |
| Trim32           | 6.28488   | 8.21491         | 0           | 1         | 1         |
| Tlr4             | 0.776299  | 0.692724        | -0.164332   | 0.383186  | 0.712878  |
| Gm11221          | 15.6147   | 18.4656         | 0.24194     | 0.0869615 | 0.360489  |
| Gm11222          | 7.07903   | 7.69512         | 0.120391    | 0.492201  | 0.780855  |
| Frmd3            | 9.94514   | 7.73271         | 0           | 1         | 1         |
| Frmd3            | 8.58263   | 7.71453         | 0           | 1         | 1         |
| Frmd3_j1         | 10.0633   | 9.37912         | 0           | 1         | 1         |

|                  |           |           |               |           |           |
|------------------|-----------|-----------|---------------|-----------|-----------|
| Tyrp1_j1         | 0.134598  | 0         | 0             | 1         | 1         |
| Tyrp1            | 2.39095   | 2.65614   | 0             | 1         | 1         |
| Tyrp1_j2         | 1.38422   | 2.65117   | 0             | 1         | 1         |
| D4Bwg0951e       | 8.00898   | 5.25195   | -0.608765     | 0.0001058 | 0.0022615 |
| D4Bwg0951e_j2    | 5.34068   | 4.67465   | -0.192164     | 0.53455   | 0.805719  |
| Gm11266          | 0.101748  | 0.295509  | 0             | 1         | 1         |
| 4930473A06Rik_j4 | 0.215025  | 0.140607  | -0.61283      | 0.222581  | 0.569566  |
| 4930473A06Rik    | 0.0843429 | 0.0797441 | -0.0808888    | 0.921351  | 1         |
| XLOC_022910      | 0.0602323 | 0         | -1.79769e+308 | 0.0352746 | 1         |
| XLOC_022911      | 0.126816  | 0.0460453 | 0             | 1         | 1         |
| Cntln_j3         | 0.450557  | 0         | -1.79769e+308 | 1.00E-15  | 2.22E-13  |
| Cntln            | 0.101456  | 0         | -1.79769e+308 | 5.93E-05  | 1         |
| Gm12418          | 6.27338   | 5.92763   | -0.0817895    | 0.622122  | 0.85221   |
| Cntln_j8         | 0.299631  | 0.613909  | 1.03484       | 0.0710936 | 0.320562  |
| Sh3gl2           | 9.35073   | 4.54636   | 0             | 1         | 1         |
| Dennd4c_j3       | 0.237308  | 0.197891  | -0.262051     | 0.458406  | 0.761003  |
| Acer2_j1         | 0.415739  | 0         | -1.79769e+308 | 8.48E-15  | 1.62E-12  |
| Acer2            | 0.109286  | 0.0560076 | -0.96442      | 0.316194  | 1         |
| Acer2_j3         | 0.266243  | 0.189044  | -0.494018     | 0.331344  | 0.673024  |
| BC057079         | 2.52807   | 2.01357   | -0.328278     | 0.0386978 | 0.219141  |
| BC057079_j6      | 1.43509   | 0.68148   | -1.0744       | 0.0037102 | 0.0406824 |
| Mtap             | 9.74406   | 7.67659   | -0.344058     | 0.0041972 | 0.0444142 |
| XLOC_022924      | 0.216302  | 0.32691   | 0.595842      | 0.370779  | 0.703864  |
| Ift74            | 9.09473   | 8.79922   | -0.0476547    | 0.689851  | 0.885136  |
| Tek              | 0.118362  | 0.156778  | 0.40552       | 0.476648  | 1         |
| Tek              | 0.431362  | 0.673873  | 0.643579      | 0.018108  | 0.131624  |
| XLOC_022928      | 0.141268  | 0.185773  | 0.395104      | 0.53116   | 0.803433  |
| Fggy_j3          | 0.199528  | 0         | -1.79769e+308 | 0.0008348 | 0.0123979 |
| Fggy_j2          | 0.11836   | 0         | -1.79769e+308 | 0.0073596 | 1         |
| Fggy_j5          | 1.53299   | 1.31131   | -0.225336     | 0.558042  | 0.819826  |
| Hook1            | 0.760404  | 0.603493  | -0.333429     | 0.168794  | 0.505572  |
| Hook1_j6         | 0.715237  | 0.536962  | -0.413601     | 0.224025  | 0.571228  |
| Nfia             | 2.27995   | 1.879     | -0.279037     | 0.0517129 | 0.263703  |
| Nfia_j5          | 2.3913    | 1.85037   | -0.369983     | 0.0545589 | 0.272453  |
| Inadl_j7         | 9.29535   | 6.53058   | 0             | 1         | 1         |
| Inadl_j8         | 1.57184   | 0.672287  | 0             | 1         | 1         |
| Usp1_j1          | 0.187474  | 0.155634  | -0.268538     | 0.592775  | 0.8379    |
| Atg4c            | 4.55847   | 3.82382   | -0.253534     | 0.0890459 | 0.365707  |
| Alg6_j2          | 1.88504   | 1.70271   | -0.146758     | 0.488781  | 0.779309  |
| Alg6             | 0.903164  | 0.520039  | -0.796369     | 0.0159292 | 0.120027  |
| Pgm2             | 16.6888   | 14.5571   | 0             | 1         | 1         |
| Pgm2             | 38.1426   | 37.6238   | 0             | 1         | 1         |
| Cachd1           | 3.84131   | 3.55331   | -0.112436     | 0.37961   | 0.710915  |
| Cachd1_j1        | 5.60919   | 5.79118   | 0.046064      | 0.72918   | 0.904035  |
| AK002929_j2      | 0.066675  | 0         | -1.79769e+308 | 0.0506803 | 1         |
| Dnajc6_j1        | 0.935958  | 0.365854  | 0             | 1         | 1         |
| Dnajc6           | 10.7375   | 7.22691   | 0             | 1         | 1         |

|                  |           |                 |            |           |           |
|------------------|-----------|-----------------|------------|-----------|-----------|
| Dnajc6           | 4.83234   | 4.35408         | 0          | 1         | 1         |
| Dnajc6_j5        | 21.4983   | 19.2462         | 0          | 1         | 1         |
| Leprot           | 6.67328   | 6.41889         | 0          | 1         | 1         |
| Lepr_j2          | 0.114568  | 0.0043663       | -4.71365   | 0.0823983 | 1         |
| XLOC_022952      | 0.220438  | 0.182561        | -0.271998  | 0.567571  | 0.824883  |
| Pde4b_j1         | 0.853062  | 0.946016        | 0          | 1         | 1         |
| Pde4b            | 1.07852   | 0.815776        | 0          | 1         | 1         |
| Pde4b            | 1.87955   | 4.35817         | 0          | 1         | 1         |
| Sgip1_j4         | 0.112314  | 0.0299144       | 0          | 1         | 1         |
| Sgip1_j7         | 2.8994    | 2.81953         | 0          | 1         | 1         |
| Tctex1d1_j1      | 0.132916  | 0.0117852       | -3.49547   | 0.142271  | 1         |
| Tctex1d1_j5      | 0.646803  | 0.307484        | -1.07281   | 0.0229913 | 0.155086  |
| Mier1            | 0.776749  | 0.540389        | -0.523449  | 0.0965563 | 0.38387   |
| Mier1_j4         | 0.59655   | 0 -1.79769e+308 |            | 3.50E-13  | 5.41E-11  |
| Oma1             | 2.50193   | 2.08614         | -0.262205  | 0.211588  | 0.55642   |
| Dab1_j6          | 0.0773373 | 0.12416         | 0.682959   | 0.279446  | 1         |
| Ppap2b           | 12.3263   | 11.8408         | 0          | 1         | 1         |
| Gm12727          | 2.27083   | 2.62848         | 0.21101    | 0.529205  | 0.802396  |
| Usp24            | 0.676796  | 0.581021        | -0.22013   | 0.298641  | 0.645349  |
| Usp24_j1         | 0.058673  | 0 -1.79769e+308 |            | 6.60E-05  | 1         |
| Dhcr24           | 130.714   | 139.984         | 0.0988492  | 0.261456  | 0.610687  |
| Pars2            | 1.30954   | 0.895454        | -0.548367  | 0.063081  | 0.297625  |
| Ssbp3_j1         | 21.7018   | 21.4373         | 0          | 1         | 1         |
| Ssbp3_j4         | 14.7767   | 15.6242         | 0          | 1         | 1         |
| Ssbp3_j6         | 27.8525   | 31.6879         | 0          | 1         | 1         |
| mFLJ00377_j1     | 0.681258  | 0.691166        | 0.0208304  | 0.89196   | 0.965687  |
| Tmem59           | 17.5059   | 16.8192         | -0.0577288 | 0.591548  | 0.837134  |
| Tmem59_j1        | 112.777   | 102.402         | -0.139234  | 0.11489   | 0.421764  |
| Hspb11           | 6.42701   | 6.1978          | -0.0523917 | 0.836116  | 0.94739   |
| Yipf1            | 20.6563   | 20.3725         | -0.0199564 | 0.86353   | 0.956634  |
| Tmem48_j1        | 4.142     | 4.08337         | 0          | 1         | 1         |
| Lrp8_j1          | 1.38358   | 1.79944         | 0.379148   | 0.0601711 | 0.288818  |
| Lrp8_j3          | 0.0928494 | 0.163438        | 0.815783   | 0.315087  | 0.659071  |
| Lrp8_j8          | 0.349189  | 0 -1.79769e+308 |            | 1.06E-05  | 0.0003246 |
| Magoh            | 17.3479   | 17.6773         | 0.0271405  | 0.838748  | 0.948621  |
| 0610037L13Rik    | 0.121462  | 0.131116        | 0          | 1         | 1         |
| 0610037L13Rik_j3 | 3.7749    | 2.99157         | 0          | 1         | 1         |
| Slc1a7           | 0.158264  | 0.295142        | 0.89908    | 0.0394964 | 0.222094  |
| Echdc2           | 0.814676  | 1.24323         | 0.609789   | 0.115371  | 0.422416  |
| Echdc2           | 0.68607   | 0.50646         | -0.437907  | 0.4334    | 0.744785  |
| Echdc2_j1        | 1.72453   | 1.48403         | -0.21668   | 0.434518  | 0.745636  |
| 2010305A19Rik    | 1.75107   | 1.89028         | 0.110367   | 0.445178  | 0.752854  |
| Zcchc11_j5       | 0.236576  | 0.213071        | -0.150969  | 0.734547  | 0.906406  |
| Zcchc11_j4       | 0.0493047 | 0 -1.79769e+308 |            | 0.005103  | 1         |
| Cc2d1b_j2        | 0.364374  | 0.294244        | -0.308408  | 0.568665  | 0.825638  |
| Cc2d1b           | 0.267319  | 0.212413        | -0.331694  | 0.319119  | 0.662469  |
| Nrd1_j2          | 12.9311   | 15.1836         | 0          | 1         | 1         |

|                  |           |                 |            |           |           |
|------------------|-----------|-----------------|------------|-----------|-----------|
| Nrd1             | 4.81771   | 4.95858         | 0          | 1         | 1         |
| Calr4_j6         | 0.0705816 | 0.117048        | 0.729743   | 0.415864  | 1         |
| Calr4            | 0.13233   | 0.0965531       | -0.454741  | 0.625439  | 1         |
| Eps15_j1         | 7.81607   | 6.81146         | 0          | 1         | 1         |
| Eps15_j5         | 0.0531946 | 0.0322917       | 0          | 1         | 1         |
| Ttc39a_j1        | 0.638863  | 0.419971        | 0          | 1         | 1         |
| Ttc39a_j2        | 3.67378   | 2.66322         | 0          | 1         | 1         |
| Faf1             | 0.254059  | 0.0461608       | -2.46042   | 0.0024491 | 0.0293507 |
| Bend5            | 0.254941  | 0.335795        | 0.397417   | 0.430606  | 0.743283  |
| Bend5            | 1.40011   | 1.9596          | 0.485024   | 0.0597568 | 0.287655  |
| Spata6           | 0.269459  | 0.513245        | 0          | 1         | 1         |
| Gm12821          | 5.70337   | 7.46912         | 0.389123   | 0.0575842 | 0.281219  |
| 9130206I24Rik_j1 | 0.405159  | 0.224562        | -0.851376  | 0.342781  | 0.68269   |
| Stil_j1          | 0.0865322 | 0.0724438       | -0.256376  | 0.790604  | 1         |
| Gm12833          | 2.02196   | 1.80108         | -0.166892  | 0.664738  | 0.873063  |
| 4732418C07Rik    | 5.80274   | 5.37336         | 0          | 1         | 1         |
| Atpaf1_j1        | 0.126176  | 0.0149359       | -3.07858   | 0.071465  | 1         |
| Mobkl2c          | 0.331438  | 0.322771        | -0.0382247 | 0.929696  | 0.978418  |
| Mknk1            | 8.18514   | 7.73045         | -0.0824536 | 0.525968  | 0.800977  |
| Mknk1_j6         | 3.54751   | 2.54312         | -0.480206  | 0.0518157 | 0.263999  |
| Lrrc41_j1        | 12.6618   | 9.68882         | 0          | 1         | 1         |
| Lrrc41_j4        | 6.49553   | 8.36263         | 0          | 1         | 1         |
| Pomgnt1_j1       | 0.0581464 | 0.052929        | -0.135634  | 0.922175  | 1         |
| Pik3r3           | 4.19892   | 2.94742         | 0          | 1         | 1         |
| Pik3r3_j4        | 0.12665   | 0.0339568       | 0          | 1         | 1         |
| Ipp              | 1.5879    | 1.11945         | -0.504328  | 0.0103451 | 0.0877012 |
| Gppb111          | 4.77955   | 4.2392          | -0.173085  | 0.202483  | 0.546123  |
| Ccdc17_j1        | 0.469351  | 0.487249        | 0.0539926  | 0.851538  | 0.952852  |
| Prdx1            | 21.519    | 21.6679         | 0.00995078 | 0.916999  | 0.97399   |
| Ccdc163_j1       | 0.0671634 | 0.393497        | 2.55061    | 0.0145302 | 0.112352  |
| Ccdc163_j4       | 0.148238  | 0.0366133       | -2.01748   | 0.241964  | 0.589269  |
| Ccdc163_j3       | 0.658826  | 0.295943        | -1.15458   | 0.0981327 | 0.387205  |
| Ccdc163_j2       | 0.0841072 | 0 -1.79769e+308 | 0.0327865  | 0.0327865 | 1         |
| Ccdc163_j12      | 0.139564  | 0.0314505       | -2.14977   | 0.245688  | 0.593119  |
| Ccdc163_j13      | 0.283197  | 0.385746        | 0.445844   | 0.548331  | 0.814125  |
| Tesk2            | 0.388474  | 0.40477         | 0          | 1         | 1         |
| Mutyh_j2         | 0.329993  | 0.311716        | 0          | 1         | 1         |
| Mutyh_j1         | 0.090113  | 0.147581        | 0          | 1         | 1         |
| Mutyh            | 0.364741  | 0.398043        | 0          | 1         | 1         |
| Zswim5           | 2.32178   | 2.05922         | -0.173137  | 0.177269  | 0.516511  |
| Hectd3_j1        | 0.0976732 | 0.14366         | 0.556623   | 0.446262  | 1         |
| Eif2b3           | 10.0214   | 9.71329         | -0.0450536 | 0.738532  | 0.908119  |
| Tmem53           | 2.7218    | 2.41822         | 0          | 1         | 1         |
| Eri3_j1          | 10.1633   | 8.89928         | 0          | 1         | 1         |
| Eri3             | 17.8085   | 20.8498         | 0          | 1         | 1         |
| Slc6a9_j1        | 0.790805  | 0.95928         | 0.27863    | 0.27766   | 0.626539  |
| Slc6a9           | 0.0995695 | 0.254455        | 1.35363    | 0.0290689 | 0.181719  |

|             |            |           |               |           |           |
|-------------|------------|-----------|---------------|-----------|-----------|
| Med8        | 6.61785    | 7.10409   | 0             | 1         | 1         |
| XLOC_023033 | 0.114722   | 0.0953258 | 0             | 1         | 1         |
| Elov1       | 0.291122   | 0.272407  | 0             | 1         | 1         |
| Elov1       | 18.5882    | 22.2367   | 0             | 1         | 1         |
| Ebna1bp2    | 1.98705    | 1.69855   | 0             | 1         | 1         |
| Slc2a1      | 20.265     | 25.8194   | 0             | 1         | 1         |
| Slc2a1_j2   | 2.14688    | 7.23365   | 0             | 1         | 1         |
| Ccdc23      | 11.1024    | 13.4445   | 0.276145      | 0.0686974 | 0.314116  |
| Cldn19      | 2.28402    | 3.30674   | 0.533829      | 0.0002712 | 0.0049278 |
| Foxj3       | 0.803421   | 1.10594   | 0             | 1         | 1         |
| Foxj3_j4    | 5.30265    | 4.75033   | 0             | 1         | 1         |
| Hivep3_j2   | 0.164192   | 0         | 0             | 1         | 1         |
| Krc_j3      | 0.398959   | 0         | 0             | 1         | 1         |
| XLOC_023043 | 0.0658312  | 0.0112547 | 0             | 1         | 1         |
| Edn2        | 0.386833   | 0.242831  | -0.671759     | 0.13152   | 0.451411  |
| Scmh1       | 2.1867     | 2.92453   | 0             | 1         | 1         |
| Scmh1_j2    | 2.34646    | 1.69423   | 0             | 1         | 1         |
| Scmh1_j1    | 3.21881    | 2.89411   | 0             | 1         | 1         |
| Cited4      | 0.278054   | 0.121935  | -1.18925      | 0.0609508 | 0.291245  |
| Rims3_j1    | 3.67077    | 2.14654   | 0             | 1         | 1         |
| Rims3       | 6.08586    | 3.26503   | 0             | 1         | 1         |
| Col9a2_j2   | 0.347711   | 0.258286  | -0.42892      | 0.401366  | 0.724661  |
| Gm12892     | 207.229    | 199.465   | -0.0550914    | 0.521061  | 0.798005  |
| Ppt1        | 2.94272    | 2.8667    | 0             | 1         | 1         |
| Mycl1       | 0.159282   | 0.137104  | -0.216307     | 0.705395  | 0.892269  |
| Trit1_j4    | 0.467848   | 0.714687  | 0.611272      | 0.140861  | 0.466831  |
| Trit1_j3    | 0.157894   | 0.458181  | 1.53696       | 0.0158293 | 0.119366  |
| Trit1       | 0.933673   | 0.631891  | -0.563243     | 0.110107  | 0.41294   |
| XLOC_023052 | 0.0839109  | 0.0368078 | -1.18885      | 0.347063  | 1         |
| Hpcal4      | 0.00557803 | 0.0855412 | 3.93879       | 0.0513324 | 1         |
| Hpcal4_j1   | 0.156789   | 0.11021   | -0.508572     | 0.391825  | 0.718161  |
| Heyl        | 3.68754    | 3.56359   | -0.0493262    | 0.705885  | 0.892502  |
| Pabpc4_j1   | 2.14675    | 3.23486   | 0.591548      | 0.0061886 | 0.0600123 |
| Pabpc4_j7   | 0.76299    | 0.288407  | -1.40356      | 0.0828253 | 0.350803  |
| Pabpc4_j6   | 1.79646    | 3.17591   | 0.822017      | 0.0040506 | 0.0433082 |
| Pabpc4_j11  | 0.453266   | 0.110777  | -2.0327       | 0.0167547 | 0.124514  |
| Pabpc4_j13  | 0.986901   | 0.693844  | -0.508295     | 0.288668  | 0.636345  |
| Mycbp       | 3.56693    | 2.97633   | -0.261149     | 0.0321349 | 0.194449  |
| Fhl3_j10    | 0.189064   | 0.108321  | -0.803563     | 0.164826  | 0.500895  |
| Sf3a3       | 0.18056    | 0.126871  | 0             | 1         | 1         |
| Inpp5b      | 6.58221    | 6.30148   | -0.0628812    | 0.5769    | 0.829228  |
| Yrdc        | 3.77258    | 2.46998   | -0.611055     | 0.0010319 | 0.0146507 |
| Yrdc_j2     | 0.233447   | 0.0694008 | -1.75007      | 0.0680579 | 0.312396  |
| Epha10_j1   | 0.188196   | 0.132044  | -0.511215     | 0.550259  | 0.815296  |
| Epha10_j2   | 0.137707   | 0         | -1.79769e+308 | 0.0148732 | 0.114225  |
| AK134673_j1 | 0.221512   | 0.0352295 | -2.65253      | 0.0209075 | 0.145317  |
| AK134673    | 0.181705   | 0.0844387 | -1.10562      | 0.136662  | 0.459682  |

|                  |           |                 |            |           |           |
|------------------|-----------|-----------------|------------|-----------|-----------|
| 9930104L06Rik_j1 | 0.801787  | 1.11603         | 0.47708    | 0.0898869 | 0.367952  |
| 9930104L06Rik_j3 | 1.91848   | 1.46278         | -0.391251  | 0.0841832 | 0.354093  |
| Rspo1            | 4.05306   | 6.00134         | 0.566273   | 0.0001538 | 0.0030805 |
| Gnl2             | 3.52543   | 3.69656         | 0          | 1         | 1         |
| Gnl2_j5          | 10.3053   | 14.8372         | 0          | 1         | 1         |
| Snip1            | 4.79138   | 4.92135         | 0.0386127  | 0.779696  | 0.925661  |
| 2310005N01Rik_j3 | 4.41162   | 4.17662         | -0.0789719 | 0.542127  | 0.809999  |
| Grik3            | 1.24158   | 0.680976        | -0.866506  | 1.64E-05  | 0.000472  |
| Grik3_j3         | 0.0814793 | 0 -1.79769e+308 |            | 3.60E-05  | 1         |
| Oscp1_j2         | 1.73723   | 1.52963         | -0.183612  | 0.319471  | 0.662774  |
| Oscp1_j1         | 1.66815   | 1.58909         | -0.070049  | 0.701618  | 0.890412  |
| Stk40_j3         | 4.11799   | 4.82614         | 0          | 1         | 1         |
| Stk40            | 0.947813  | 0.824245        | 0          | 1         | 1         |
| Stk40_j6         | 2.06739   | 2.5502          | 0          | 1         | 1         |
| Fam176b          | 0.307568  | 0.454469        | 0.563276   | 0.175216  | 0.513531  |
| Fam176b          | 1.56371   | 1.7755          | 0.183255   | 0.529031  | 0.802307  |
| Trappc3          | 16.7536   | 20.9912         | 0.325316   | 0.0247004 | 0.16296   |
| 5730409E04Rik    | 23.6386   | 18.5301         | 0          | 1         | 1         |
| 5730409E04Rik    | 6.43771   | 6.02566         | 0          | 1         | 1         |
| Psmb2            | 110.588   | 111.175         | 0.00763915 | 0.934954  | 0.980088  |
| Sfpq_j1          | 9.10077   | 9.75959         | 0          | 1         | 1         |
| Sfpq_j2          | 0.657717  | 1.33122         | 0          | 1         | 1         |
| Zmym6_j3         | 0.382678  | 0.409229        | 0.0967788  | 0.739507  | 0.908632  |
| Zmym6_j5         | 0.854204  | 0.460909        | -0.890099  | 0.0036761 | 0.0404731 |
| Zmym6_j8         | 0.45539   | 0.239497        | -0.927092  | 0.0424115 | 0.232786  |
| Dlgap3           | 19.4142   | 17.8647         | -0.119998  | 0.197464  | 0.540362  |
| Dlgap3_j1        | 2.32269   | 2.15962         | -0.105022  | 0.617559  | 0.84951   |
| BC003266         | 36.9347   | 36.1648         | -0.0303907 | 0.754647  | 0.915367  |
| XLOC_023094      | 0.0788985 | 0 -1.79769e+308 |            | 0.0017765 | 1         |
| Csmd2_j1         | 0.273936  | 0.24073         | 0          | 1         | 1         |
| Phc2             | 2.72256   | 3.08053         | 0          | 1         | 1         |
| XLOC_023096      | 0.0603254 | 0.0376319       | 0          | 1         | 1         |
| A3galt2          | 4.5243    | 3.26103         | 0          | 1         | 1         |
| Trim62           | 3.76303   | 3.42465         | -0.135939  | 0.379129  | 0.710597  |
| Ak2              | 13.714    | 15.503          | 0.176903   | 0.218125  | 0.564496  |
| Ak2_j3           | 0.0617574 | 0 -1.79769e+308 |            | 0.074952  | 1         |
| Rnf19b_j1        | 0.107222  | 0.333462        | 0          | 1         | 1         |
| Rnf19b           | 15.7793   | 22.9816         | 0          | 1         | 1         |
| Tmem54_j1        | 1.04793   | 0.524096        | -0.999639  | 0.0088453 | 0.0782138 |
| Tmem54_j4        | 0.347045  | 0.28544         | -0.281936  | 0.652368  | 0.866801  |
| Fndc5_j1         | 0.0585747 | 0 -1.79769e+308 |            | 0.123229  | 1         |
| Fndc5_j2         | 3.1323    | 1.38778         | -1.17445   | 0.0077908 | 0.0712134 |
| Fndc5_j3         | 0.156963  | 0.0888476       | -0.821023  | 0.566871  | 0.824741  |
| Yars             | 6.84261   | 7.32229         | 0          | 1         | 1         |
| AK077492_j1      | 0.321797  | 0.674934        | 1.06859    | 0.112105  | 0.416662  |
| Sync             | 6.2427    | 6.90307         | 0.145069   | 0.237391  | 0.584096  |
| Bsd1             | 18.0229   | 17.8493         | -0.0139643 | 0.884839  | 0.963475  |

|             |           |                 |            |           |           |
|-------------|-----------|-----------------|------------|-----------|-----------|
| Marcks1     | 10.4242   | 16.1484         | 0.631458   | 4.64E-07  | 2.10E-05  |
| Ptp4a2      | 12.2177   | 11.9905         | -0.0270802 | 0.804638  | 0.935336  |
| Ptp4a2_j3   | 24.0741   | 25.5001         | 0.0830234  | 0.38816   | 0.715717  |
| Bai2_j8     | 0.466972  | 0.226492        | -1.04388   | 0.0188286 | 0.135304  |
| Bai2_j6     | 0.517438  | 0.163476        | -1.6623    | 0.0008007 | 0.0119976 |
| Bai2_j4     | 0.602879  | 0.317397        | -0.925582  | 0.0112467 | 0.0935084 |
| Col16a1_j3  | 3.81022   | 4.07024         | 0          | 1         | 1         |
| Col16a1_j5  | 0.590669  | 0.865873        | 0          | 1         | 1         |
| Pef1_j3     | 38.0398   | 40.558          | 0          | 1         | 1         |
| Snrnp40     | 8.56101   | 9.76887         | 0.19041    | 0.171122  | 0.507955  |
| Snrnp40_j1  | 2.62961   | 3.31124         | 0.332526   | 0.278688  | 0.627544  |
| Nkain1      | 3.82504   | 6.76621         | 0.822872   | 5.43E-09  | 4.01E-07  |
| Pum1_j7     | 0.37928   | 0.362633        | -0.0647514 | 0.87953   | 0.96152   |
| Pum1        | 1.96996   | 2.5052          | 0.346757   | 0.0394916 | 0.222094  |
| Pum1_j10    | 0.0669221 | 0.0501872       | -0.415163  | 0.72633   | 1         |
| Sdc3        | 7.38878   | 8.15748         | 0          | 1         | 1         |
| XLOC_023127 | 0.135126  | 0.00913273      | -3.88711   | 0.451781  | 1         |
| XLOC_023128 | 0.182473  | 0               | 0          | 1         | 1         |
| Mecr        | 21.0988   | 21.6038         | 0.0341216  | 0.761165  | 0.917801  |
| Srsf4       | 8.35939   | 9.556           | 0.193008   | 0.126242  | 0.44247   |
| Srsf4_j1    | 2.79419   | 2.17768         | -0.359641  | 0.0790445 | 0.341105  |
| Taf12       | 2.33478   | 2.51907         | 0.109604   | 0.471425  | 0.768965  |
| Snhg12      | 9.02328   | 10.9671         | 0.281462   | 0.110939  | 0.414534  |
| Dnajc8      | 4.50645   | 4.51407         | 0          | 1         | 1         |
| Dnajc8_j2   | 3.79196   | 3.69387         | 0          | 1         | 1         |
| Dnajc8_j3   | 0.245003  | 0.070183        | 0          | 1         | 1         |
| Ptafr_j1    | 0.630463  | 0.696972        | 0          | 1         | 1         |
| Eya3_j1     | 4.20619   | 3.1118          | 0          | 1         | 1         |
| Eya3_j2     | 4.8615    | 4.57345         | 0          | 1         | 1         |
| Rpa2        | 4.93876   | 5.1211          | 0          | 1         | 1         |
| Ahdc1_j3    | 1.06193   | 1.42024         | 0          | 1         | 1         |
| Ahdc1_j2    | 1.00323   | 0.421087        | 0          | 1         | 1         |
| Wasf2       | 6.5788    | 6.01833         | 0          | 1         | 1         |
| XLOC_023144 | 0.198368  | 0.227322        | 0.196555   | 0.814714  | 0.939556  |
| Map3k6_j2   | 0.0498284 | 0 -1.79769e+308 | 0.0040485  |           | 1         |
| Map3k6_j4   | 0.132312  | 0.185819        | 0.489948   | 0.415609  | 0.733384  |
| Slc9a1      | 6.12563   | 4.84126         | 0          | 1         | 1         |
| Gpatch3_j2  | 0.376043  | 0.673279        | 0.840306   | 0.0103998 | 0.0880425 |
| Ubxn11_j2   | 0.0974587 | 0.154298        | 0.662855   | 0.547225  | 1         |
| Ubxn11      | 0.0318753 | 0.0550513       | 0.788341   | 0.654645  | 1         |
| Ubxn11_j5   | 0.10723   | 0 -1.79769e+308 | 0.0133571  |           | 1         |
| Pafah2      | 2.70723   | 4.01704         | 0          | 1         | 1         |
| Pafah2_j5   | 0.63874   | 0.609848        | 0          | 1         | 1         |
| Pafah2_j6   | 1.23458   | 1.5312          | 0          | 1         | 1         |
| Stmn1_j10   | 0.567834  | 1.03988         | 0.872875   | 0.267128  | 0.616108  |
| Paqr7       | 7.43572   | 5.07919         | -0.549873  | 4.92E-05  | 0.001177  |
| Paqr7_j1    | 4.17124   | 2.13538         | -0.965983  | 8.64E-07  | 3.65E-05  |



|               |           |                 |            |           |           |
|---------------|-----------|-----------------|------------|-----------|-----------|
| Rhd           | 0.0872602 | 0.149054        | 0.77244    | 0.31581   | 1         |
| Rhd_j2        | 0.0495186 | 0.0149582       | -1.72703   | 0.469933  | 1         |
| Syf2          | 13.4366   | 13.5966         | 0.0170703  | 0.89339   | 0.966325  |
| Runx3_j2      | 0.0863812 | 0 -1.79769e+308 |            | 0.0044991 | 1         |
| Srsf10_j1     | 0.914579  | 0.719771        | -0.345569  | 0.487465  | 0.778377  |
| Hmgcl_j1      | 2.09982   | 2.58719         | 0.301117   | 0.156923  | 0.49074   |
| Hmgcl         | 6.71731   | 6.75103         | 0.00722495 | 0.964779  | 0.990042  |
| Gale          | 3.77499   | 3.78012         | 0.00196008 | 0.990347  | 0.997044  |
| Id3           | 28.9316   | 28.6697         | -0.0131183 | 0.899819  | 0.968081  |
| E2f2_j2       | 0.247997  | 0.317092        | 0.354581   | 0.379866  | 0.711076  |
| Asap3_j3      | 0.189573  | 0.13331         | -0.507963  | 0.523311  | 0.799177  |
| Tcea3_j1      | 0.11422   | 0.0394658       | -1.53314   | 0.353097  | 1         |
| Tcea3         | 0.646615  | 0.365629        | -0.822525  | 0.0698686 | 0.3173    |
| Zfp46_j1      | 0.824     | 0.287975        | 0          | 1         | 1         |
| Zfp46_j3      | 2.4754    | 3.50212         | 0          | 1         | 1         |
| Zfp46_j4      | 0.293379  | 0.203015        | 0          | 1         | 1         |
| Zfp46         | 1.9331    | 1.42811         | 0          | 1         | 1         |
| Hnrnpr        | 1.84789   | 1.27585         | -0.534424  | 0.0012706 | 0.0173193 |
| Hnrnpr        | 0.487961  | 0.633206        | 0.375908   | 0.128722  | 0.447079  |
| Gm17388_j1    | 0.168205  | 0.0518146       | -1.69879   | 0.0641155 | 0.300498  |
| Htr1d_j1      | 1.02204   | 1.11337         | 0.123482   | 0.536472  | 0.806869  |
| Htr1d         | 2.81046   | 1.34355         | -1.06475   | 8.62E-11  | 8.94E-09  |
| Htr1d_j5      | 0.226978  | 0.136617        | -0.732413  | 0.106416  | 0.405059  |
| Htr1d_j6      | 1.20624   | 0.880818        | -0.453595  | 0.0314146 | 0.191494  |
| 6030445D17Rik | 0.172701  | 0.138717        | -0.316133  | 0.559332  | 0.820587  |
| Luzp1         | 2.53819   | 1.15033         | 0          | 1         | 1         |
| Wnt4          | 0.233239  | 0.884278        | 1.92269    | 1.23E-10  | 1.23E-08  |
| Gm13004       | 0.704975  | 0.826051        | 0.228659   | 0.665014  | 0.873063  |
| Hspg2_j1      | 1.1231    | 1.05575         | -0.0892175 | 0.548191  | 0.814092  |
| Hspg2_j5      | 0.686448  | 0.980271        | 0.514031   | 0.0092155 | 0.0806507 |
| Hspg2_j7      | 1.2996    | 1.04223         | -0.318386  | 0.065455  | 0.304871  |
| Usp48_j4      | 0.0711885 | 0 -1.79769e+308 |            | 0.0051665 | 1         |
| Usp48_j11     | 2.55552   | 2.73886         | 0.0999585  | 0.560214  | 0.821025  |
| Rap1gap_j2    | 20.7508   | 15.4109         | 0          | 1         | 1         |
| Rap1gap_j7    | 0.395961  | 0.310726        | 0          | 1         | 1         |
| Ece1_j1       | 8.32677   | 7.85041         | 0          | 1         | 1         |
| Ece1_j3       | 11.0461   | 11.7988         | 0          | 1         | 1         |
| Eif4g3_j4     | 3.44006   | 0.723545        | -2.24928   | 0         | 0         |
| Eif4g3_j11    | 3.19347   | 3.44106         | 0.107725   | 0.457021  | 0.760235  |
| Eif4g3_j15    | 10.0818   | 12.0588         | 0.258333   | 0.0108317 | 0.0907682 |
| Hp1bp3        | 4.35855   | 4.77548         | 0.131799   | 0.492055  | 0.78083   |
| Hp1bp3        | 4.39578   | 3.64435         | -0.270457  | 0.214843  | 0.560355  |
| Hp1bp3_j3     | 1.67922   | 1.09957         | -0.610861  | 0.0890359 | 0.365707  |
| Hp1bp3_j5     | 0.0728921 | 0 -1.79769e+308 |            | 0.0316451 | 1         |
| Sh2d5_j1      | 1.20641   | 0.447498        | 0          | 1         | 1         |
| Kif17_j5      | 0.505802  | 0.0686543       | 0          | 1         | 1         |
| Kif17_j3      | 0.556704  | 0.395838        | -0.492001  | 0.163548  | 0.498858  |

|               |           |                 |            |           |           |
|---------------|-----------|-----------------|------------|-----------|-----------|
| Ddost         | 31.5964   | 31.8241         | 0          | 1         | 1         |
| Mul1_j1       | 1.20544   | 1.3035          | 0.112834   | 0.537272  | 0.807424  |
| Mul1          | 5.43011   | 5.47716         | 0.0124461  | 0.906254  | 0.970331  |
| Camk2n1_j1    | 2.2633    | 1.94168         | -0.221122  | 0.237828  | 0.584631  |
| Pla2g2d       | 0.768173  | 1.74415         | 1.18303    | 2.17E-07  | 1.07E-05  |
| Tmco4_j4      | 0.0728879 | 0 -1.79769e+308 |            | 0.0075523 | 1         |
| Tmco4_j1      | 0.174774  | 0.0761195       | -1.19915   | 0.148505  | 0.477341  |
| Tmco4         | 0.563873  | 0.617894        | 0.131989   | 0.673568  | 0.877015  |
| Capzb         | 175.9     | 196.291         | 0.158239   | 0.0646998 | 0.302393  |
| Akr7a5        | 13.1561   | 12.4586         | -0.0785867 | 0.523079  | 0.799177  |
| C230096C10Rik | 14.7427   | 14.4654         | -0.0274002 | 0.759836  | 0.917276  |
| Ubr4_j2       | 0.286824  | 0.362261        | 0.336865   | 0.161963  | 0.497121  |
| Ubr4_j1       | 1.0751    | 0.666921        | -0.688884  | 6.42E-05  | 0.0014756 |
| Ubr4_j13      | 0.894029  | 0.0444348       | -4.33056   | 0.000273  | 0.0049504 |
| Iffo2         | 0.332922  | 0.545096        | 0          | 1         | 1         |
| Iffo2_j1      | 0.336611  | 0.275003        | 0          | 1         | 1         |
| Aldh4a1       | 3.98335   | 4.12535         | 0          | 1         | 1         |
| Aldh4a1_j1    | 5.05833   | 5.742           | 0          | 1         | 1         |
| Gm1667_j2     | 1.58109   | 1.65465         | 0.065607   | 0.83462   | 0.946855  |
| XLOC_023207   | 0.18476   | 0.0415771       | -2.15179   | 0.0061247 | 0.0595357 |
| Rcc2_j2       | 2.98564   | 0.956318        | 0          | 1         | 1         |
| Rcc2_j4       | 6.78251   | 8.67768         | 0          | 1         | 1         |
| Sdhb          | 34.0554   | 37.3026         | 0.131392   | 0.17576   | 0.514267  |
| Sdhb_j1       | 53.0154   | 61.7086         | 0.21906    | 0.0410086 | 0.227624  |
| Atp13a2       | 1.49094   | 0               | 0          | 1         | 1         |
| Atp13a2_j4    | 0.31259   | 0.216464        | 0          | 1         | 1         |
| Fbxo42        | 5.46962   | 4.68442         | 0          | 1         | 1         |
| Fbxo42_j4     | 0.467227  | 1.04003         | 0          | 1         | 1         |
| 6330545A04Rik | 0.427776  | 0.149274        | -1.5189    | 0.00047   | 0.0077293 |
| XLOC_023214   | 0.180061  | 0.0938999       | -0.939287  | 0.164336  | 0.500271  |
| Arhgef19_j1   | 0.187133  | 0.196912        | 0          | 1         | 1         |
| Arhgef19_j4   | 0.0738739 | 0               | 0          | 1         | 1         |
| Arhgef19_j8   | 2.82439   | 3.31633         | 0          | 1         | 1         |
| Fam131c       | 1.53039   | 1.7929          | 0.228396   | 0.349359  | 0.687112  |
| Hspb7         | 0.203139  | 0.14292         | -0.507259  | 0.444446  | 0.752113  |
| Zbtb17        | 5.62218   | 5.50527         | -0.0303171 | 0.814495  | 0.939456  |
| Casp9         | 8.17434   | 7.69128         | 0          | 1         | 1         |
| XLOC_023226   | 0.101685  | 0.0316489       | -1.68388   | 0.366013  | 1         |
| Anp32b-ps1    | 13.9661   | 16.9194         | 0.276744   | 0.0189047 | 0.135632  |
| Pramef8       | 0.652404  | 0.426461        | -0.613352  | 0.103246  | 0.398343  |
| Pramef8       | 4.15029   | 3.52074         | -0.237334  | 0.0930275 | 0.375197  |
| Gm13082       | 78.3339   | 70.3767         | -0.154538  | 0.13775   | 0.461659  |
| Dhrs3         | 2.52782   | 2.48705         | -0.0234633 | 0.90202   | 0.968734  |
| Gm13152_j1    | 0.176231  | 0.167001        | -0.0776096 | 0.946808  | 0.984298  |
| Gm13152_j2    | 0.57156   | 0.443419        | -0.366236  | 0.43347   | 0.744803  |
| Gm13152_j4    | 0.160221  | 0 -1.79769e+308 |            | 0.0320331 | 0.194047  |
| 2510039O18Rik | 8.88195   | 9.03755         | 0.0250544  | 0.842223  | 0.950214  |

|               |          |           |               |           |           |
|---------------|----------|-----------|---------------|-----------|-----------|
| Nppb          | 8.63076  | 8.179     | -0.0775636    | 0.641845  | 0.861896  |
| Mthfr_j6      | 1.68354  | 2.04907   | 0             | 1         | 1         |
| Mad2l2_j4     | 0.86396  | 0.763552  | 0             | 1         | 1         |
| Fbxo2         | 171.648  | 171.169   | 0             | 1         | 1         |
| Mtor          | 8.9396   | 8.59386   | -0.0569046    | 0.543745  | 0.811058  |
| Mtor_j4       | 16.9105  | 17.0383   | 0.0108625     | 0.925345  | 0.976852  |
| Exosc10       | 6.47031  | 7.39549   | 0.192811      | 0.115719  | 0.423274  |
| Srm           | 21.8961  | 25.3759   | 0.212786      | 0.0658886 | 0.306275  |
| Gm13203_j1    | 0.660053 | 2.21552   | 1.74699       | 1.40E-05  | 0.0004131 |
| Dffa          | 1.48161  | 0.946106  | 0             | 1         | 1         |
| Lzic_j1       | 0.154174 | 0.29935   | 0             | 1         | 1         |
| Lzic          | 1.86957  | 1.70532   | 0             | 1         | 1         |
| Ctnnbip1      | 6.67035  | 5.88233   | 0             | 1         | 1         |
| Ctnnbip1_j1   | 0.636559 | 0         | 0             | 1         | 1         |
| Clstn1        | 3.61514  | 3.9637    | 0             | 1         | 1         |
| Clstn1_j4     | 31.7004  | 19.4307   | 0             | 1         | 1         |
| Clstn1_j5     | 13.3315  | 18.2674   | 0             | 1         | 1         |
| Gm13067_j1    | 0.775799 | 0.389947  | -0.992403     | 7.96E-06  | 0.0002536 |
| XLOC_023268   | 0.163206 | 0.0592829 | -1.46101      | 0.267068  | 0.616066  |
| XLOC_023268   | 0.296592 | 0.114069  | -1.37857      | 0.0002885 | 0.0051761 |
| Gpr157        | 3.51276  | 2.91745   | -0.267895     | 0.0399419 | 0.223613  |
| Gm5506_j1     | 0.25574  | 0.343565  | 0             | 1         | 1         |
| Rere_j2       | 3.85152  | 3.21827   | -0.259142     | 0.0397444 | 0.222943  |
| Rere_j8       | 2.12329  | 1.24076   | -0.775075     | 4.47E-05  | 0.0010847 |
| Rere_j10      | 5.17231  | 4.41215   | -0.229327     | 0.0622681 | 0.295391  |
| Rere_j13      | 8.78208  | 11.3382   | 0.368555      | 0.0015914 | 0.0207562 |
| Errfi1        | 7.29309  | 7.16584   | -0.0253927    | 0.820907  | 0.942065  |
| Dnajc11       | 16.8163  | 17.3523   | 0.0452722     | 0.644122  | 0.862786  |
| Klhl21        | 6.15     | 5.57963   | -0.140418     | 0.24758   | 0.595013  |
| No19          | 1.35285  | 1.377     | 0.025524      | 0.905772  | 0.970052  |
| mKIAA0720_j2  | 0.576901 | 0.0299584 | 0             | 1         | 1         |
| mKIAA0720_j5  | 0.762305 | 0.793892  | 0             | 1         | 1         |
| mKIAA0720_j6  | 1.98029  | 2.1449    | 0             | 1         | 1         |
| mKIAA0720_j10 | 0.670851 | 0         | 0             | 1         | 1         |
| Tnfrsf25_j4   | 0.37052  | 0.337245  | 0             | 1         | 1         |
| Acot7         | 56.4021  | 64.1306   | 0.185265      | 0.0442612 | 0.239938  |
| Acot7_j2      | 13.1534  | 0         | -1.79769e+308 | 7.52E-47  | 2.65E-44  |
| Gpr153_j1     | 0.301302 | 0.112524  | 0             | 1         | 1         |
| Gpr153        | 4.98219  | 3.44659   | 0             | 1         | 1         |
| lcmt_j1       | 0.273057 | 0.135277  | 0             | 1         | 1         |
| lcmt_j2       | 16.7417  | 18.7099   | 0             | 1         | 1         |
| Chd5_j3       | 0.970508 | 0.855408  | 0             | 1         | 1         |
| A430005L14Rik | 5.52713  | 5.58679   | 0.0154894     | 0.931437  | 0.979142  |
| BC046331      | 2.28017  | 1.87973   | 0             | 1         | 1         |
| Lrrc47        | 8.33276  | 8.2865    | -0.00803142   | 0.937762  | 0.980993  |
| Megf6_j1      | 0.197355 | 0.237187  | 0.265234      | 0.658936  | 0.870368  |
| AK083203      | 2.1644   | 2.3248    | 0.103142      | 0.541879  | 0.809832  |

|                   |           |           |               |           |           |
|-------------------|-----------|-----------|---------------|-----------|-----------|
| Ttc34_j2          | 0.148284  | 0         | -1.79769e+308 | 3.60E-05  | 0.0009019 |
| Hes5              | 2.24312   | 2.3513    | 0.0679524     | 0.764874  | 0.91949   |
| Pank4_j1          | 2.12711   | 1.63194   | -0.382314     | 0.0634754 | 0.298841  |
| Pex10             | 1.51726   | 1.49874   | 0             | 1         | 1         |
| Morn1_j1          | 0.13217   | 0.0292922 | -2.1738       | 0.0213025 | 1         |
| Morn1             | 0.815303  | 0.728705  | -0.162002     | 0.630463  | 0.856286  |
| 2610002J02Rik     | 6.01472   | 3.97451   | 0             | 1         | 1         |
| 2610002J02Rik     | 21.521    | 25.6423   | 0             | 1         | 1         |
| 2010015L04Rik     | 0.971037  | 0.676675  | -0.521064     | 0.0374843 | 0.214638  |
| 2010015L04Rik_j2  | 0.222427  | 0.209306  | -0.087715     | 0.898133  | 0.967613  |
| 2010015L04Rik_j5  | 0.0728086 | 0.0952412 | 0.387476      | 0.726425  | 1         |
| 2010015L04Rik_j7  | 0.126319  | 0.11008   | -0.198517     | 0.811471  | 1         |
| Gnb1              | 90.5758   | 70.5653   | 0             | 1         | 1         |
| Nadk              | 6.23081   | 6.1997    | 0             | 1         | 1         |
| XLOC_023310       | 0.0927128 | 0.0583236 | 0             | 1         | 1         |
| Cdk11b_j1         | 0.501605  | 0.452143  | 0             | 1         | 1         |
| Cdk11b_j8         | 8.62091   | 9.80521   | 0             | 1         | 1         |
| B930041F14Rik     | 2.17627   | 1.94367   | 0             | 1         | 1         |
| Ssu72_j5          | 1.69678   | 1.09377   | 0             | 1         | 1         |
| Ssu72_j4          | 9.55249   | 9.89724   | 0             | 1         | 1         |
| Mrpl20_j2         | 0.221146  | 0.590669  | 1.41735       | 0.0590674 | 0.28563   |
| Aurkaip1_j3       | 0.19018   | 0.28736   | 0             | 1         | 1         |
| Aurkaip1          | 17.1885   | 16.492    | 0             | 1         | 1         |
| Mxra8_j4          | 0.0720624 | 0         | 0             | 1         | 1         |
| Dvl1              | 11.5023   | 12.7269   | 0.145961      | 0.246381  | 0.594086  |
| Acap3_j1          | 2.17279   | 2.59161   | 0.254295      | 0.0565976 | 0.278347  |
| Ube2j2_j1         | 0.80699   | 0.841694  | 0.0607464     | 0.846128  | 0.951378  |
| Fam132a           | 4.79522   | 4.83071   | 0.010638      | 0.952488  | 0.986299  |
| Sdf4_j8           | 17.7526   | 15.4064   | 0             | 1         | 1         |
| 9430015G10Rik_j6  | 0.599318  | 0.576255  | -0.0566142    | 0.830993  | 0.945521  |
| 9430015G10Rik_j10 | 0.713416  | 0.914155  | 0.357694      | 0.304778  | 0.65013   |
| XLOC_023328       | 0.584813  | 0.421128  | -0.473718     | 0.363531  | 0.697532  |
| Tmem68            | 3.93546   | 3.56227   | 0             | 1         | 1         |
| Plag1_j1          | 0.150042  | 0.0884594 | -0.76228      | 0.181146  | 0.521088  |
| Plag1_j2          | 0.0793823 | 0.0238185 | -1.73673      | 0.126505  | 1         |
| Penk_j1           | 3.22162   | 5.49635   | 0.770686      | 0.000763  | 0.0115254 |
| Penk              | 5.3856    | 6.9512    | 0.368153      | 0.0284653 | 0.179488  |
| Impad1            | 6.01322   | 5.47245   | 0             | 1         | 1         |
| Nsmaf_j2          | 0.0679151 | 0.0726697 | 0             | 1         | 1         |
| Nsmaf_j3          | 0.07085   | 0.0609123 | 0             | 1         | 1         |
| Tox_j2            | 0.426409  | 0.776354  | 0.864476      | 0.0104628 | 0.0883916 |
| Car8              | 1.54896   | 1.50033   | 0             | 1         | 1         |
| Asph              | 20.9478   | 15.7724   | -0.409403     | 4.47E-05  | 0.0010851 |
| Plekhf2           | 3.10509   | 3.19609   | 0.0416733     | 0.788135  | 0.929506  |
| 2310030N02Rik     | 2.24681   | 2.27085   | 0.0153512     | 0.95829   | 0.988063  |
| 2310030N02Rik_j2  | 1.81714   | 1.63666   | -0.150917     | 0.659599  | 0.870764  |
| AK080292_j1       | 0.155707  | 0.2035    | 0.386203      | 0.335614  | 0.676294  |

|               |           |                 |           |           |           |
|---------------|-----------|-----------------|-----------|-----------|-----------|
| Ints8         | 1.51946   | 1.41227         | -0.105541 | 0.568883  | 0.825693  |
| Dpy19l4       | 2.49885   | 1.61207         | 0         | 1         | 1         |
| Pdp1_j1       | 2.91881   | 2.3188          | 0         | 1         | 1         |
| Pdp1          | 5.88034   | 5.1486          | 0         | 1         | 1         |
| Pdp1          | 1.70022   | 0.707513        | 0         | 1         | 1         |
| Tmem67        | 0.944175  | 0.822222        | -0.199526 | 0.448659  | 0.755215  |
| Tmem67_j6     | 0.282779  | 0.233081        | -0.278845 | 0.602347  | 0.842837  |
| Gm11843       | 0.844367  | 0.670457        | 0         | 1         | 1         |
| Fam92a_j6     | 0         | 0.118307        | 0         | 1         | 1         |
| Fam92a_j11    | 1.42097   | 0               | 0         | 1         | 1         |
| Gm11826       | 15.7439   | 16.6206         | 0.0781803 | 0.633073  | 0.857438  |
| Slc26a7_j1    | 0.655401  | 0.766242        | 0.225422  | 0.434995  | 0.745922  |
| Slc26a7_j3    | 0.598153  | 0.217187        | -1.46157  | 0.0006154 | 0.0096983 |
| Otud6b_j4     | 10.4696   | 10.753          | 0         | 1         | 1         |
| Necab1_j3     | 8.74624   | 8.24291         | 0         | 1         | 1         |
| Necab1        | 17.4164   | 12.2077         | 0         | 1         | 1         |
| Decr1         | 13.8185   | 13.9181         | 0.0103634 | 0.917023  | 0.97399   |
| Osgin2_j1     | 0.211206  | 0               | 0         | 1         | 1         |
| Osgin2        | 4.07174   | 3.46767         | 0         | 1         | 1         |
| Rip2_j2       | 0.398469  | 0.378813        | 0         | 1         | 1         |
| Rip2_j1       | 0.265759  | 0.387885        | 0         | 1         | 1         |
| Cpne3         | 18.2753   | 13.3858         | 0         | 1         | 1         |
| Wwp1_j8       | 1.05772   | 0.38586         | -1.45481  | 0.0009643 | 0.0138988 |
| Wwp1_j7       | 0.396426  | 0.318541        | -0.315571 | 0.562013  | 0.821919  |
| Wwp1_j6       | 0.407342  | 0.296931        | -0.456112 | 0.402371  | 0.725465  |
| Nkain3        | 0.354019  | 0.492614        | 0.476631  | 0.225094  | 0.572335  |
| 2610029I01Rik | 17.8856   | 15.2262         | -0.232238 | 0.0433283 | 0.236221  |
| Klhl32_j5     | 0.100438  | 0 -1.79769e+308 |           | 2.42E-05  | 1         |
| Klhl32        | 0.500811  | 0.211666        | -1.24248  | 0.000263  | 0.0048062 |
| Klhl32_j7     | 0.256622  | 0.348829        | 0.442873  | 0.437517  | 0.747721  |
| Ufl1_j1       | 0.0853171 | 0.178458        | 1.06467   | 0.0409476 | 0.227363  |
| 1810074P20Rik | 6.24287   | 6.47564         | 0.0528119 | 0.677587  | 0.878807  |
| Manea         | 1.67393   | 1.5228          | 0         | 1         | 1         |
| Manea_j2      | 6.19372   | 4.14367         | 0         | 1         | 1         |
| Gm11914       | 1.00588   | 0.848616        | -0.245276 | 0.525966  | 0.800977  |
| XLOC_023380   | 0.109764  | 0 -1.79769e+308 |           | 0.089573  | 1         |
| XLOC_023381   | 0.0701068 | 0.0001085       | -9.33571  | 0.955864  | 1         |
| XLOC_023381   | 0.0813859 | 0.0229038       | -1.82919  | 0.417519  | 1         |
| XLOC_023381   | 0.0553122 | 0 -1.79769e+308 |           | 0.0832602 | 1         |
| XLOC_023381   | 0.0499193 | 0 -1.79769e+308 |           | 0.105916  | 1         |
| Ankrd6_j4     | 0.237194  | 0.401959        | 0         | 1         | 1         |
| Ankrd6_j5     | 0.440432  | 0.080056        | 0         | 1         | 1         |
| Ankrd6_j1     | 1.03759   | 0.943322        | 0         | 1         | 1         |
| Ankrd6        | 0.896388  | 0.991095        | 0         | 1         | 1         |
| Ankrd6        | 1.13554   | 1.13578         | 0         | 1         | 1         |
| Pm20d2        | 0.649014  | 0.560649        | -0.211152 | 0.425994  | 0.74082   |
| Pnrc1         | 7.13004   | 7.38975         | 0.0516162 | 0.717666  | 0.898239  |

|                  |           |                        |            |           |           |
|------------------|-----------|------------------------|------------|-----------|-----------|
| Pnrc1_j3         | 0.460749  | 0.455494               | -0.016546  | 0.980245  | 0.994006  |
| Orc3             | 0.0974323 | 0.0669008              | -0.542377  | 0.253277  | 1         |
| Slc35a1          | 3.41352   | 3.36219                | -0.0218581 | 0.900509  | 0.968352  |
| 1700003M02Rik_j3 | 2.13637   | 1.49624                | -0.513816  | 0.0225636 | 0.153205  |
| 1810030N24Rik    | 5.24915   | 4.57911                | -0.197017  | 0.40636   | 0.727764  |
| Zfp292_j1        | 0.155434  | 0 -1.79769e+308        |            | 0.0707626 | 0.319729  |
| Zfp292           | 0.623902  | 0.27736                | -1.16956   | 2.54E-05  | 0.0006731 |
| Mobkl2b          | 0.912578  | 1.00529                | 0.139593   | 0.489812  | 0.779571  |
| Mobkl2b_j1       | 0.202293  | 0 -1.79769e+308        |            | 1.78E-08  | 1.19E-06  |
| 3110043O21Rik_j1 | 1.05703   | 0.642094               | -0.719167  | 0.0349128 | 0.205291  |
| 3110043O21Rik_j2 | 0.706994  | 0.426081               | -0.73057   | 0.0762773 | 0.333677  |
| Lingo2_j2        | 0.0447391 | 0.0747422              | 0          | 1         | 1         |
| Lingo2_j3        | 0.0622432 | 0.15915                | 0          | 1         | 1         |
| Lingo2_j4        | 0.30906   | 0.154348               | 0          | 1         | 1         |
| Ddx58            | 3.96271   | 4.00589                | 0.0156331  | 0.903332  | 0.969103  |
| Topors           | 1.00224   | 0.994693               | -0.0109103 | 0.964141  | 0.989941  |
| Ndufb6           | 97.3511   | 89.3208                | -0.124201  | 0.198099  | 0.541214  |
| Smu1             | 7.9151    | 8.22548                | 0          | 1         | 1         |
| B4galt1          | 4.15521   | 3.50161                | 0          | 1         | 1         |
| Bag1             | 0.496816  | 0.567636               | 0          | 1         | 1         |
| Nol6             | 8.11122   | 6.89976                | 0          | 1         | 1         |
| Ubp2_j3          | 11.2539   | 11.8396                | 0          | 1         | 1         |
| Ubp2_j4          | 2.14775   | 2.76007                | 0          | 1         | 1         |
| Ubp2             | 4.08512   | 4.32132                | 0          | 1         | 1         |
| Dcaf12           | 0         | 0.0959482 1.79769e+308 |            | 0.0003682 | 1         |
| Kif24_j1         | 0.084082  | 0.031447               | -1.41888   | 0.212787  | 1         |
| Al464131         | 3.78299   | 3.84621                | 0.0239095  | 0.834905  | 0.946943  |
| Smrp1_j4         | 2.85E-05  | 0.0609274              | 11.0631    | 0.973955  | 1         |
| Smrp1_j10        | 0.199471  | 0 -1.79769e+308        |            | 0.0021255 | 0.0262016 |
| 2310028H24Rik_j3 | 12.4583   | 12.1268                | 0          | 1         | 1         |
| 2310028H24Rik    | 34.319    | 29.7456                | 0          | 1         | 1         |
| Enho             | 21.8298   | 34.8698                | 0.675683   | 1.88E-10  | 1.79E-08  |
| Cntfr_j1         | 19.1746   | 20.7602                | 0          | 1         | 1         |
| Cntfr            | 12.1646   | 6.29091                | 0          | 1         | 1         |
| 2810432D09Rik    | 3.48308   | 3.70086                | 0.0874939  | 0.619609  | 0.850756  |
| Dctn3            | 118       | 121.564                | 0.0429336  | 0.628426  | 0.855356  |
| Sigmar1          | 54.9817   | 64.8813                | 0.238852   | 0.0078727 | 0.0717138 |
| XLOC_023426      | 0.211377  | 0.0809548              | -1.38463   | 0.113557  | 0.419331  |
| Vcp_j9           | 0.976752  | 1.10469                | 0.177584   | 0.707224  | 0.893223  |
| Vcp_j10          | 0.377074  | 0.254887               | -0.564988  | 0.162506  | 0.498004  |
| Vcp_j13          | 2.21162   | 2.2588                 | 0.030453   | 0.943357  | 0.982934  |
| Fancg            | 2.2507    | 2.87835                | 0.354867   | 0.0612457 | 0.292138  |
| Fancg_j2         | 1.03962   | 0.498586               | -1.06014   | 0.0039263 | 0.0423286 |
| Pigo_j7          | 0.0773105 | 0.0431905              | -0.83995   | 0.528465  | 1         |
| Pigo_j8          | 0         | 0.243225 1.79769e+308  |            | 0.0001418 | 0.0028695 |
| Pigo             | 0.599561  | 0.0801974              | -2.90228   | 1.96E-05  | 0.0005465 |
| Stoml2           | 6.31025   | 5.34579                | -0.239293  | 0.204581  | 0.548743  |

|                  |          |                 |            |           |           |
|------------------|----------|-----------------|------------|-----------|-----------|
| B230312A22Rik_j2 | 0.099569 | 0               | 0          | 1         | 1         |
| B230312A22Rik    | 4.94152  | 7.46354         | 0          | 1         | 1         |
| B230312A22Rik_j3 | 0.799631 | 1.48981         | 0          | 1         | 1         |
| B230312A22Rik_j4 | 3.82967  | 2.51785         | 0          | 1         | 1         |
| Fam166b_j1       | 0.209277 | 0.133657        | 0          | 1         | 1         |
| Rmrp             | 1.48151  | 2.81438         | 0.92575    | 0.0419757 | 0.231358  |
| E130306D19Rik_j2 | 0.153054 | 0.123834        | -0.305632  | 0.740675  | 0.909129  |
| Tpm2             | 0.176055 | 0 -1.79769e+308 |            | 0.0074668 | 0.0691206 |
| Tpm2_j4          | 0.304783 | 0.255637        | -0.253685  | 0.695209  | 0.887572  |
| Tln1_j1          | 12.1826  | 16.025          | 0          | 1         | 1         |
| Gne              | 0.219772 | 0.227233        | 0          | 1         | 1         |
| Rnf38_j1         | 1.10328  | 0.763694        | 0          | 1         | 1         |
| Rnf38_j3         | 3.71007  | 2.38845         | 0          | 1         | 1         |
| Rnf38_j2         | 0.676313 | 0.188443        | 0          | 1         | 1         |
| Zbtb5            | 0.602467 | 1.02934         | 0          | 1         | 1         |
| Zbtb5            | 0.395026 | 0.393929        | 0          | 1         | 1         |
| Zbtb5            | 0.181748 | 0.14971         | 0          | 1         | 1         |
| Fbxo10_j2        | 0.762692 | 0.679126        | -0.167421  | 0.583932  | 0.833209  |
| Fbxo10           | 2.19041  | 2.13715         | -0.0355175 | 0.825588  | 0.943748  |
| Tomm5_j3         | 4.27558  | 4.8504          | 0.181985   | 0.557201  | 0.819456  |
| Tomm5            | 3.90107  | 3.48544         | -0.162528  | 0.627471  | 0.854629  |
| Tomm5            | 0.509942 | 0.201495        | -1.33959   | 0.266126  | 0.615299  |
| Exosc3_j1        | 1.08937  | 1.23447         | 0.180388   | 0.430699  | 0.743283  |
| Exosc3           | 0.272724 | 0.292246        | 0.099743   | 0.791859  | 0.930476  |
| Mcart1           | 8.70217  | 7.34409         | 0          | 1         | 1         |
| Shb_j1           | 0.547699 | 0.514487        | -0.0902484 | 0.848776  | 0.952149  |
| Shb              | 0.510231 | 0.474733        | -0.104036  | 0.762725  | 0.918312  |
| Tstd2            | 0.666038 | 0.612352        | -0.121244  | 0.486     | 0.777413  |
| Tstd2_j2         | 3.21857  | 3.39668         | 0.0777063  | 0.540524  | 0.808873  |
| 5830415F09Rik    | 0.592353 | 0.699267        | 0.239387   | 0.497246  | 0.783771  |
| Trim14           | 0.619978 | 0.639261        | 0.0441898  | 0.895447  | 0.96693   |
| Coro2a           | 40.7207  | 38.2963         | 0          | 1         | 1         |
| Tbc1d2_j1        | 0.111648 | 0.0253733       | -2.13758   | 0.0989241 | 1         |
| Tbc1d2_j2        | 0.121611 | 0 -1.79769e+308 |            | 6.95E-05  | 1         |
| Gabbr2           | 23.1128  | 17.423          | 0          | 1         | 1         |
| Anks6_j1         | 0.338772 | 0.270404        | -0.325201  | 0.362995  | 0.697185  |
| Anks6_j9         | 0.304375 | 0.20577         | -0.564812  | 0.284646  | 0.633366  |
| Alg2             | 47.8234  | 49.41           | 0.0470882  | 0.588375  | 0.835489  |
| Erp44            | 3.36679  | 2.66658         | 0          | 1         | 1         |
| Tex10            | 1.90736  | 1.59787         | 0          | 1         | 1         |
| Baat_j1          | 0.1548   | 0 -1.79769e+308 |            | 0.0022363 | 0.0272162 |
| 2810432L12Rik_j3 | 0.149854 | 0               | 0          | 1         | 1         |
| 2810432L12Rik_j2 | 28.3683  | 27.4042         | 0          | 1         | 1         |
| Grin3a_j1        | 0.187544 | 0.121068        | 0          | 1         | 1         |
| Grin3a           | 0.973802 | 0.750779        | 0          | 1         | 1         |
| AK012547         | 0.361302 | 0.45279         | 0.325637   | 0.608347  | 0.845647  |
| Abca1            | 2.59955  | 5.34752         | 0          | 1         | 1         |

|                  |           |                 |            |           |           |
|------------------|-----------|-----------------|------------|-----------|-----------|
| Al427809_j1      | 0.333512  | 0.525953        | 0.657196   | 0.124792  | 0.440142  |
| XLOC_023480      | 0.188055  | 0.173626        | 0          | 1         | 1         |
| Klf4             | 1.19551   | 1.41199         | 0.2401     | 0.249337  | 0.596796  |
| Ikbkap_j7        | 0.0641212 | 0.0408114       | -0.651831  | 0.527094  | 1         |
| Ikbkap           | 0.550625  | 0.422447        | -0.382302  | 0.129863  | 0.448865  |
| Ctnnal1_j5       | 1.63373   | 1.33266         | 0          | 1         | 1         |
| Ctnnal1          | 7.37208   | 6.69371         | 0          | 1         | 1         |
| D730040F13Rik    | 0.333149  | 0.401483        | 0          | 1         | 1         |
| 6430704M03Rik    | 3.27605   | 2.71573         | 0          | 1         | 1         |
| 6430704M03Rik    | 3.25856   | 1.33285         | 0          | 1         | 1         |
| Epb4.1l4b_j10    | 0.31702   | 0 -1.79769e+308 |            | 1.91E-12  | 2.60E-10  |
| Epb4.1l4b_j9     | 0.168229  | 7.33E-05        | -11.165    | 0.825532  | 0.943705  |
| Epb4.1l4b_j5     | 0.172912  | 0.750523        | 2.11786    | 7.67E-10  | 6.59E-08  |
| Epb4.1l4b        | 3.27413   | 3.33762         | 0.0277078  | 0.871423  | 0.959195  |
| Ptpn3_j6         | 1.1213    | 0.140068        | 0          | 1         | 1         |
| Ptpn3_j3         | 8.57827   | 7.76572         | 0          | 1         | 1         |
| Txn1_j2          | 3.76365   | 2.36702         | -0.66906   | 0.379728  | 0.711031  |
| Txn1             | 24.5768   | 26.2972         | 0.0976121  | 0.460728  | 0.762129  |
| Svep1_j4         | 0.15648   | 0 -1.79769e+308 |            | 4.98E-05  | 0.0011885 |
| Lpar1_j4         | 10.5571   | 5.62593         | 0          | 1         | 1         |
| Lpar1            | 16.5183   | 14.2176         | 0          | 1         | 1         |
| Ptgr1            | 10.5225   | 9.47281         | -0.151615  | 0.289658  | 0.637033  |
| Susd1            | 0.250571  | 0.157013        | -0.674336  | 0.243461  | 0.590641  |
| Rod1_j3          | 0.0474067 | 0.0291494       | -0.701623  | 0.549276  | 1         |
| Rod1_j4          | 0.302085  | 0 -1.79769e+308 |            | 5.43E-11  | 5.83E-09  |
| Rod1             | 2.13083   | 1.80143         | -0.242271  | 0.153768  | 0.486555  |
| 1110054O05Rik    | 3.09566   | 3.29141         | 0.0884568  | 0.575208  | 0.828142  |
| 1110054O05Rik_j2 | 5.2687    | 4.42996         | -0.250155  | 0.137643  | 0.461429  |
| Zfp37_j4         | 0.669722  | 0.405959        | -0.722226  | 0.0579703 | 0.28254   |
| Zfp37            | 0.37299   | 0.247492        | -0.591756  | 0.145044  | 0.472862  |
| Fkbp15           | 1.49099   | 1.33011         | 0          | 1         | 1         |
| Fkbp15_j2        | 0.346588  | 0.183628        | 0          | 1         | 1         |
| Fkbp15_j6        | 5.01006   | 4.75016         | 0          | 1         | 1         |
| Cdc26_j1         | 0.380807  | 0.364451        | -0.0633345 | 0.841164  | 0.949877  |
| Wdr31            | 0.37573   | 0.164773        | -1.18921   | 0.0190458 | 0.136262  |
| Hdhd3            | 3.38535   | 2.76847         | -0.290214  | 0.155406  | 0.488472  |
| Alad             | 0.0558788 | 0.225013        | 2.00964    | 0.0011472 | 0.0159621 |
| Alad             | 3.97751   | 3.44722         | -0.206435  | 0.0805325 | 0.345294  |
| Pole3            | 5.03395   | 5.06019         | 0.00750138 | 0.961567  | 0.989122  |
| Akna_j5          | 0.65298   | 0.533824        | -0.290676  | 0.490928  | 0.780156  |
| Akna_j7          | 0.112052  | 0 -1.79769e+308 |            | 9.72E-06  | 1         |
| Akna_j8          | 0.120673  | 0.0185959       | -2.69805   | 0.0496342 | 1         |
| Whrn             | 2.55124   | 1.0635          | 0          | 1         | 1         |
| Tnc_j2           | 0.0865302 | 0.113639        | 0.393182   | 0.508752  | 1         |
| Astn2_j1         | 4.7525    | 3.91748         | 0          | 1         | 1         |
| Dbc1             | 3.87384   | 2.76535         | 0          | 1         | 1         |
| Gm11223          | 111.449   | 144.182         | 0          | 1         | 1         |



|                  |            |                 |            |           |           |
|------------------|------------|-----------------|------------|-----------|-----------|
| Gm11224          | 10.8288    | 12.1441         | 0.165388   | 0.234798  | 0.582023  |
| Cdk5rap2         | 1.44771    | 1.24233         | -0.220721  | 0.179171  | 0.518765  |
| Megf9            | 18.3729    | 14.3955         | -0.351955  | 7.16E-05  | 0.0016136 |
| Tle1_j2          | 1.93651    | 1.72396         | 0          | 1         | 1         |
| Tle1_j3          | 3.22104    | 1.7158          | 0          | 1         | 1         |
| Tle1             | 0.802663   | 0.503751        | 0          | 1         | 1         |
| Tle1_j12         | 3.75712    | 3.01638         | 0          | 1         | 1         |
| Rasef_j4         | 0.171039   | 0 -1.79769e+308 |            | 5.66E-08  | 3.29E-06  |
| Rasef_j2         | 0.00870014 | 0.233313        | 4.74509    | 0.0006218 | 0.0097715 |
| 3110001D03Rik_j1 | 0.619508   | 0.693729        | 0.163249   | 0.521142  | 0.798005  |
| 3110001D03Rik    | 6.82248    | 7.57146         | 0.150274   | 0.240976  | 0.588146  |
| Ptprd_j2         | 0.127883   | 0.0233835       | -2.45126   | 0.0284557 | 1         |
| Mpdz_j12         | 1.28194    | 1.00664         | -0.348786  | 0.0829045 | 0.350922  |
| Nfib             | 2.43422    | 2.70806         | 0          | 1         | 1         |
| Zdhhc21_j2       | 4.38815    | 1.48224         | 0          | 1         | 1         |
| Zdhhc21          | 2.20142    | 1.41735         | 0          | 1         | 1         |
| Cer1             | 0.38413    | 0.301584        | -0.349037  | 0.181349  | 0.521294  |
| Frem1_j2         | 0.248507   | 0.207545        | -0.259862  | 0.651708  | 0.866378  |
| Frem1_j4         | 0.0688085  | 0.135374        | 0.97629    | 0.0725364 | 1         |
| Frem1_j3         | 0.05843    | 0 -1.79769e+308 |            | 0.0004078 | 1         |
| Ttc39b_j2        | 3.31926    | 2.03106         | 0          | 1         | 1         |
| Psip1_j3         | 11.0362    | 8.84569         | 0          | 1         | 1         |
| Psip1            | 8.06205    | 9.62189         | 0          | 1         | 1         |
| XLOC_023541      | 0.0974511  | 0.0178781       | -2.44649   | 0.286231  | 1         |
| XLOC_023541      | 0.0701778  | 0 -1.79769e+308 |            | 0.0007701 | 1         |
| Bnc2_j3          | 0.884697   | 0.0172068       | 0          | 1         | 1         |
| Bnc2_j4          | 0.160255   | 0.0141939       | 0          | 1         | 1         |
| Bnc2_j6          | 0.630812   | 0.586221        | 0          | 1         | 1         |
| Bnc2_j2          | 1.15298    | 0.709857        | 0          | 1         | 1         |
| Haus6            | 0.334184   | 0.175186        | -0.931755  | 0.0126281 | 0.101902  |
| Plin2_j2         | 0.185049   | 0.0498361       | 0          | 1         | 1         |
| Slc24a2_j5       | 16.4783    | 16.3059         | 0          | 1         | 1         |
| Mllt3_j2         | 0.92448    | 0.000680863     | 0          | 1         | 1         |
| Mllt3            | 2.97301    | 2.35569         | 0          | 1         | 1         |
| Ptplad2_j1       | 0.355292   | 0.379702        | 0.0958632  | 0.755857  | 0.915824  |
| Klhl9            | 24.6541    | 22.0176         | -0.163172  | 0.067258  | 0.310074  |
| Cdkn2a           | 0.704105   | 0.950886        | 0.433482   | 0.385307  | 0.713951  |
| Cdkn2a           | 0.693332   | 1.00613         | 0.537193   | 0.189984  | 0.531833  |
| Cdkn2b           | 3.19701    | 3.70896         | 0.214293   | 0.251739  | 0.599666  |
| XLOC_023557      | 0.562079   | 0.532449        | -0.0781288 | 0.884314  | 0.963396  |
| XLOC_023557      | 0.486737   | 0.601838        | 0.306234   | 0.346599  | 0.685483  |
| XLOC_023559      | 0.0846019  | 0.081084        | -0.0612723 | 0.949316  | 1         |
| Elavl2_j3        | 1.66114    | 6.76919         | 0          | 1         | 1         |
| Elavl2_j2        | 11.0024    | 11.4625         | 0          | 1         | 1         |
| Elavl2           | 18.1263    | 15.5264         | 0          | 1         | 1         |
| Gm12669          | 95.1207    | 100.202         | 0.0750742  | 0.396227  | 0.721006  |
| Tusc1            | 1.79431    | 2.48041         | 0.467148   | 0.0352728 | 0.206787  |

|                  |           |                 |            |           |           |
|------------------|-----------|-----------------|------------|-----------|-----------|
| AK080222         | 0.700362  | 0.571618        | -0.293051  | 0.402075  | 0.725226  |
| 5830433M19Rik_j2 | 0.729582  | 0.649202        | -0.168404  | 0.673954  | 0.877026  |
| 5830433M19Rik    | 2.14282   | 2.2793          | 0.0890816  | 0.664222  | 0.87286   |
| Plaa_j1          | 21.2863   | 23.697          | 0          | 1         | 1         |
| Plaa             | 7.92051   | 7.37352         | 0          | 1         | 1         |
| 4930579C15Rik_j1 | 0.174744  | 0.0404464       | -2.11116   | 0.0977285 | 0.386304  |
| Mysm1            | 1.12052   | 0.825025        | 0          | 1         | 1         |
| Cyp2j13_j1       | 0.156817  | 0.169951        | 0.116037   | 0.781867  | 0.926329  |
| Cyp2j13_j3       | 0.141953  | 0.0239812       | -2.56544   | 0.158385  | 0.492583  |
| Cyp2j6           | 17.2398   | 15.9947         | -0.108147  | 0.259988  | 0.608587  |
| Cyp2j9           | 13.278    | 13.4343         | 0.0168847  | 0.879567  | 0.96152   |
| E130114P18Rik    | 0.0895145 | 0 -1.79769e+308 |            | 0.0346547 | 1         |
| E130114P18Rik    | 0.534888  | 0.433336        | -0.303751  | 0.521146  | 0.798005  |
| Tm2d1_j1         | 0.23342   | 0.369777        | 0.663729   | 0.498158  | 0.783887  |
| Tm2d1_j4         | 7.44648   | 7.33402         | -0.0219531 | 0.933126  | 0.979673  |
| Kank4            | 8.4622    | 4.76365         | 0          | 1         | 1         |
| Dock7_j8         | 2.5064    | 3.78695         | 0.595419   | 0.0299749 | 0.185644  |
| Dock7_j5         | 0.323194  | 0.446362        | 0.465816   | 0.15708   | 0.490842  |
| Dock7_j7         | 4.14171   | 4.34032         | 0.0675747  | 0.560174  | 0.821025  |
| Gm12688_j3       | 0.536547  | 0.44882         | 0          | 1         | 1         |
| Gm12688_j2       | 0.439514  | 0.529514        | 0          | 1         | 1         |
| Itgb3bp          | 0.212146  | 0.215161        | 0.0203612  | 0.965701  | 0.990168  |
| Itgb3bp          | 1.0892    | 0.862402        | -0.336842  | 0.108204  | 0.408949  |
| Gm12699          | 1.5656    | 1.66753         | 0.0909985  | 0.716381  | 0.897624  |
| Jak1_j2          | 46.6531   | 56.9998         | 0          | 1         | 1         |
| Jak1             | 9.577     | 8.78141         | 0          | 1         | 1         |
| Gm12799          | 0.922942  | 1.53203         | 0          | 1         | 1         |
| Insl5            | 0.124207  | 0.191685        | 0.62599    | 0.487844  | 0.778453  |
| Slc35d1          | 0.549627  | 0.495062        | 0          | 1         | 1         |
| Prkaa2_j3        | 5.50839   | 5.10442         | 0          | 1         | 1         |
| Prkaa2           | 1.77893   | 1.85897         | 0          | 1         | 1         |
| Gm12722          | 12.403    | 14.1276         | 0.18783    | 0.270338  | 0.619522  |
| Pcsk9            | 0.790562  | 0.767064        | -0.0435311 | 0.869126  | 0.958391  |
| Pcsk9_j3         | 0.110221  | 0.0160035       | -2.78393   | 0.0893406 | 1         |
| Pcsk9_j4         | 0.126816  | 0 -1.79769e+308 |            | 0.000191  | 1         |
| BC055111_j1      | 0.14641   | 0 -1.79769e+308 |            | 0.0083921 | 0.0751587 |
| Ttc4_j3          | 0.103146  | 0.0788966       | 0          | 1         | 1         |
| Ttc4             | 3.06461   | 3.28435         | 0          | 1         | 1         |
| Gm1027_j2        | 0.0938306 | 0 -1.79769e+308 |            | 0.0016279 | 1         |
| Gm1027_j12       | 0.103645  | 0.0844846       | -0.294895  | 0.801159  | 1         |
| Acot11           | 1.90709   | 1.63078         | 0          | 1         | 1         |
| Acot11_j2        | 0.404917  | 0.402602        | 0          | 1         | 1         |
| Mrpl37           | 14.7755   | 14.8943         | 0.0115539  | 0.910157  | 0.971586  |
| Lrrc42           | 9.45579   | 11.3434         | 0.262581   | 0.0449701 | 0.242379  |
| Gm12908          | 0.678383  | 0.4211          | -0.687938  | 0.0724864 | 0.323935  |
| Cpt2             | 15.2634   | 14.4568         | -0.0783356 | 0.457566  | 0.760488  |
| Podn_j4          | 0.0795685 | 0.0564751       | -0.494581  | 0.684932  | 1         |

|                  |          |           |               |           |           |
|------------------|----------|-----------|---------------|-----------|-----------|
| Podn_j5          | 0.10546  | 0         | -1.79769e+308 | 0.0670428 | 1         |
| Scp2_j4          | 3.16588  | 1.59775   | -0.986568     | 0.0011229 | 0.0156877 |
| Zyg11b           | 8.16454  | 6.77499   | 0             | 1         | 1         |
| Zyg11b_j1        | 0.342176 | 0.270018  | 0             | 1         | 1         |
| Fam159a          | 0.173105 | 0.509716  | 1.55805       | 0.0134751 | 0.10663   |
| Gpx7_j2          | 0.103396 | 0.120134  | 0.21647       | 0.874054  | 1         |
| Gpx7             | 0.820308 | 1.01081   | 0.301273      | 0.348205  | 0.686627  |
| Zfyve9_j1        | 5.45478  | 4.64086   | 0             | 1         | 1         |
| Zfyve9_j2        | 0.486143 | 0.238904  | 0             | 1         | 1         |
| Osbpl9_j1        | 13.679   | 16.1453   | 0             | 1         | 1         |
| AK148461_j2      | 1.50969  | 0.742333  | 0             | 1         | 1         |
| AK148461_j3      | 2.58401  | 2.39134   | 0             | 1         | 1         |
| Rnf11            | 69.7694  | 70.8945   | 0             | 1         | 1         |
| Cdkn2c           | 1.67448  | 1.55549   | -0.106342     | 0.731292  | 0.904922  |
| Cdkn2c           | 0.508911 | 0.553729  | 0.121767      | 0.742802  | 0.909993  |
| Elavl4_j5        | 29.1328  | 31.3325   | 0             | 1         | 1         |
| Elavl4           | 16.1773  | 14.7426   | 0             | 1         | 1         |
| Elavl4_j1        | 36.2894  | 27.2325   | 0             | 1         | 1         |
| Gm12818          | 3.46314  | 4.20719   | 0.280775      | 0.13291   | 0.453791  |
| Cmpk1            | 25.3378  | 24.5966   | 0             | 1         | 1         |
| Cyp4x1           | 2.19343  | 2.06104   | 0             | 1         | 1         |
| Cyp4b1           | 1.22114  | 2.29668   | 0.911323      | 0.0001525 | 0.0030566 |
| 4930544O15Rik_j1 | 0.123445 | 0.0474743 | -1.37865      | 0.183591  | 1         |
| Faah             | 5.37095  | 4.40546   | -0.285885     | 0.0168823 | 0.125138  |
| Nsun4_j3         | 5.58242  | 4.97908   | 0             | 1         | 1         |
| Nsun4            | 1.6198   | 1.54376   | 0             | 1         | 1         |
| Uqcrh_j1         | 117.899  | 116.063   | 0             | 1         | 1         |
| Uqcrh            | 12.2492  | 10.7832   | 0             | 1         | 1         |
| 1520402A15Rik    | 2.26252  | 1.71043   | -0.403567     | 0.0064935 | 0.0621533 |
| Tspan1_j1        | 0.189893 | 0         | -1.79769e+308 | 0.0035387 | 0.03927   |
| Tspan1           | 0.104639 | 0.0530948 | -0.978777     | 0.333861  | 1         |
| Mast2_j5         | 0.147179 | 0         | -1.79769e+308 | 1.04E-05  | 0.0003208 |
| Mast2_j6         | 4.48204  | 3.07544   | -0.543361     | 0.0001359 | 0.0027676 |
| Tmem69           | 3.4014   | 3.54472   | 0.0595417     | 0.715449  | 0.897199  |
| Tmem69_j1        | 0.695036 | 0.628975  | -0.144085     | 0.688412  | 0.88417   |
| Akr1a4_j2        | 3.23914  | 3.62306   | 0.161598      | 0.533109  | 0.804862  |
| Akr1a4_j1        | 0.471617 | 0.507622  | 0.106137      | 0.858752  | 0.95526   |
| Mmachc           | 8.93959  | 9.35433   | 0.0654263     | 0.585833  | 0.834076  |
| Toe1             | 1.16285  | 0.812039  | 0             | 1         | 1         |
| Btbd19_j4        | 0.103179 | 0         | -1.79769e+308 | 0.0173034 | 1         |
| Btbd19_j5        | 0.111536 | 0.0849847 | -0.392229     | 0.682359  | 1         |
| Plk3             | 3.95522  | 3.65953   | -0.1121       | 0.49661   | 0.783429  |
| Kif2c_j1         | 0.184083 | 0         | -1.79769e+308 | 0.0037369 | 0.0408742 |
| Rnf220_j2        | 20.1597  | 18.306    | 0             | 1         | 1         |
| Rnf220_j3        | 7.20102  | 5.38932   | 0             | 1         | 1         |
| B4galt2          | 7.27871  | 8.76217   | 0.267606      | 0.0362963 | 0.210507  |
| Atp6v0b          | 78.5226  | 98.3802   | 0             | 1         | 1         |

|             |           |           |             |           |           |
|-------------|-----------|-----------|-------------|-----------|-----------|
| Dph2        | 4.67549   | 4.89812   | 0.0671093   | 0.646076  | 0.863528  |
| Ipo13       | 1.82756   | 1.86662   | 0           | 1         | 1         |
| Ipo13_j3    | 0.268392  | 0.0602719 | 0           | 1         | 1         |
| St3gal3     | 3.09747   | 2.79998   | 0           | 1         | 1         |
| St3gal3     | 1.67873   | 1.89708   | 0           | 1         | 1         |
| Kdm4a_j2    | 4.01762   | 4.97771   | 0           | 1         | 1         |
| Kdm4a_j3    | 4.47854   | 4.37201   | 0           | 1         | 1         |
| Kdm4a       | 2.83505   | 2.62456   | 0           | 1         | 1         |
| Ptprf_j7    | 39.7253   | 40.187    | 0           | 1         | 1         |
| Ptprf_j6    | 1.24304   | 2.33994   | 0           | 1         | 1         |
| Ptprf_j5    | 4.86295   | 11.8344   | 0           | 1         | 1         |
| Szt2        | 0.633961  | 0.646792  | 0           | 1         | 1         |
| Szt2_j8     | 0.615349  | 0.327343  | 0           | 1         | 1         |
| Cdc20       | 0.166849  | 0.435121  | 1.38287     | 0.0077454 | 0.0709858 |
| Gm12858     | 1.72633   | 2.62266   | 0.603326    | 0.215525  | 0.561474  |
| Tie1        | 2.47371   | 2.79032   | 0.173756    | 0.235013  | 0.582228  |
| Zfp691      | 0.398461  | 0.398121  | -0.00123012 | 0.997501  | 0.999228  |
| Zfp691      | 0.53418   | 0.590479  | 0.144559    | 0.692898  | 0.8862    |
| Zfp691      | 0.578474  | 0.780791  | 0.432684    | 0.246946  | 0.594488  |
| AU022252_j1 | 0.482778  | 0.320858  | -0.589426   | 0.0218228 | 0.14967   |
| AU022252    | 0.543425  | 0.63412   | 0.222675    | 0.283619  | 0.631995  |
| Ybx1_j1     | 22.1133   | 27.3941   | 0.30895     | 0.0326489 | 0.196535  |
| Ybx1_j5     | 3.86622   | 5.26967   | 0.44679     | 0.0131545 | 0.104906  |
| Ccdc30      | 1.06326   | 1.0395    | -0.0326002  | 0.902033  | 0.968734  |
| Ccdc30_j2   | 0.680594  | 0.572473  | -0.249588   | 0.475765  | 0.771627  |
| Ppcs        | 0.916158  | 1.27559   | 0           | 1         | 1         |
| Ppcs        | 4.97104   | 4.34189   | 0           | 1         | 1         |
| Ppcs_j2     | 0.603123  | 0.384679  | 0           | 1         | 1         |
| Rimkla_j3   | 22.7076   | 17.7643   | 0           | 1         | 1         |
| Rimkla      | 19.7667   | 11.167    | 0           | 1         | 1         |
| Foxo6       | 0.50155   | 0.519783  | 0.0515181   | 0.877664  | 0.96086   |
| Ctps_j2     | 2.43579   | 1.72776   | 0           | 1         | 1         |
| Kcnq4_j2    | 1.80752   | 1.7886    | 0           | 1         | 1         |
| Kcnq4_j1    | 7.08297   | 4.02421   | 0           | 1         | 1         |
| Dem1        | 2.23404   | 2.94051   | 0.39641     | 0.0379786 | 0.216437  |
| Dem1        | 0.834404  | 0.681038  | -0.293011   | 0.443105  | 0.751132  |
| Smap2_j3    | 5.57728   | 7.39805   | 0           | 1         | 1         |
| Smap2       | 27.7662   | 22.9599   | 0           | 1         | 1         |
| Zmpste24    | 17.0328   | 16.6024   | -0.0369259  | 0.702357  | 0.890916  |
| Rlf_j3      | 0.0727279 | 0         | 0           | 1         | 1         |
| Rlf_j2      | 1.15282   | 0.814412  | 0           | 1         | 1         |
| Rlf         | 0.393736  | 0.147746  | 0           | 1         | 1         |
| Gm12873_j2  | 0.371045  | 0.273356  | -0.440814   | 0.450516  | 0.756158  |
| Cap1        | 26.5026   | 28.8929   | 0           | 1         | 1         |
| Cap1        | 80.7977   | 82.4008   | 0           | 1         | 1         |
| Mfsd2a_j1   | 0.749253  | 0.69999   | 0           | 1         | 1         |
| Mfsd2a      | 1.04539   | 1.13178   | 0           | 1         | 1         |

|                  |           |           |               |           |           |
|------------------|-----------|-----------|---------------|-----------|-----------|
| Ppie             | 5.62627   | 6.70102   | 0.252203      | 0.166917  | 0.503257  |
| Macf1_j12        | 4.17956   | 2.45607   | -0.767        | 0.0008375 | 0.012435  |
| Macf1_j1         | 0.148836  | 0.013254  | -3.48923      | 0.0036829 | 0.0405203 |
| Macf1_j2         | 0         | 0.0625729 | 1.79769e+308  | 7.39E-05  | 1         |
| Ndufs5_j1        | 6.64811   | 5.43396   | -0.29094      | 0.363173  | 0.697228  |
| Ndufs5           | 1.71995   | 1.31922   | -0.382684     | 0.51195   | 0.791859  |
| Akirin1_j3       | 0.452254  | 0.566346  | 0             | 1         | 1         |
| Akirin1_j2       | 1.73328   | 0.769401  | 0             | 1         | 1         |
| Akirin1          | 4.9342    | 5.83815   | 0             | 1         | 1         |
| Utp11l           | 4.83196   | 5.16915   | 0.0973178     | 0.467528  | 0.766717  |
| Cdca8            | 1.01295   | 1.437     | 0.504495      | 0.0323521 | 0.195255  |
| Zc3h12a          | 0.564494  | 0.501143  | -0.171737     | 0.558617  | 0.82019   |
| 1700029G01Rik_j9 | 0.0325307 | 0.0612801 | 0.913615      | 0.540926  | 1         |
| 1700029G01Rik_j8 | 0.148315  | 0         | -1.79769e+308 | 0.0007572 | 0.0114554 |
| Thrap3_j4        | 3.61864   | 4.25992   | 0.235379      | 0.20889   | 0.552995  |
| Thrap3_j5        | 0.218781  | 0.126088  | -0.795059     | 0.373203  | 0.706135  |
| Thrap3_j18       | 0.492482  | 0.0880626 | -2.48347      | 0.0276883 | 0.176253  |
| Mtap7d1_j3       | 39.2683   | 68.6939   | 0             | 1         | 1         |
| Adprhl2_j1       | 1.49569   | 0.386776  | 0             | 1         | 1         |
| Tekt2_j1         | 0.102806  | 0.0957156 | 0             | 1         | 1         |
| Eif2c3           | 0.364769  | 0.22699   | -0.684353     | 0.010756  | 0.0903045 |
| Eif2c3_j2        | 0.0567163 | 0         | -1.79769e+308 | 1.53E-06  | 1         |
| Eif2c1           | 1.80056   | 1.33191   | 0             | 1         | 1         |
| Ncdn_j4          | 0.144044  | 0         | 0             | 1         | 1         |
| Ncdn_j5          | 2.33526   | 0.517238  | 0             | 1         | 1         |
| Ncdn_j1          | 88.1759   | 75.2365   | 0             | 1         | 1         |
| Ncdn             | 20.8412   | 17.5093   | 0             | 1         | 1         |
| Zmym4            | 1.54241   | 1.15241   | -0.42053      | 0.0155157 | 0.117584  |
| Gja4             | 0.543072  | 0.518014  | -0.0681523    | 0.871511  | 0.959237  |
| XLOC_023729      | 0.164199  | 0.0924466 | -0.828757     | 0.24528   | 0.592751  |
| Zscan20          | 0.303209  | 0.228606  | -0.407447     | 0.23036   | 0.57734   |
| Zfp362_j2        | 0.371905  | 0         | 0             | 1         | 1         |
| Zfp362           | 0.993017  | 0.900065  | 0             | 1         | 1         |
| Zfp362_j4        | 0.28785   | 0.27973   | 0             | 1         | 1         |
| Adc_j2           | 1.46919   | 1.78648   | 0             | 1         | 1         |
| Adc              | 34.5229   | 39.2041   | 0             | 1         | 1         |
| Hpca             | 7.70793   | 7.48098   | -0.0431161    | 0.768054  | 0.921018  |
| S100pbp_j3       | 0.321199  | 0.152331  | 0             | 1         | 1         |
| S100pbp_j5       | 0.539587  | 0.859925  | 0             | 1         | 1         |
| S100pbp_j4       | 3.89533   | 3.56358   | 0             | 1         | 1         |
| C77080           | 27.5834   | 21.359    | 0             | 1         | 1         |
| Rbbp4            | 20.0176   | 19.2102   | -0.0593929    | 0.510193  | 0.791002  |
| Zbtb8b           | 0.303193  | 0.137726  | -1.13843      | 0.0176633 | 0.129159  |
| Hdac1_j1         | 0.210218  | 0.311065  | 0.565329      | 0.390939  | 0.717624  |
| Hdac1_j3         | 0.53892   | 0.291478  | -0.886682     | 0.183086  | 0.523605  |
| Hdac1_j9         | 0.102556  | 0.0418319 | -1.29374      | 0.246213  | 1         |
| Hdac1_j8         | 0.163414  | 0.0728344 | -1.16584      | 0.161276  | 0.496147  |

|             |           |                 |            |           |           |
|-------------|-----------|-----------------|------------|-----------|-----------|
| Lck_j1      | 0.770731  | 0.798521        | 0.0511019  | 0.863814  | 0.956651  |
| Lck         | 0.122337  | 0.2846          | 1.21807    | 0.0819624 | 0.348847  |
| Fam167b     | 1.45057   | 1.29634         | -0.162177  | 0.588404  | 0.835489  |
| Eif3i_j5    | 0.673894  | 0.781291        | 0          | 1         | 1         |
| Txlna_j3    | 1.00544   | 1.22307         | 0          | 1         | 1         |
| Kpna6_j1    | 4.87812   | 3.38475         | 0          | 1         | 1         |
| Kpna6       | 5.63282   | 4.20399         | 0          | 1         | 1         |
| Tmem39b     | 2.12957   | 2.24558         | 0.0765251  | 0.731926  | 0.905184  |
| Tmem39b_j2  | 0.192878  | 0 -1.79769e+308 |            | 0.0017269 | 0.0222194 |
| Khdrbs1     | 30.3618   | 28.121          | -0.110609  | 0.221025  | 0.568055  |
| Hcrtr1      | 0.750353  | 0.935267        | 0.317809   | 0.33275   | 0.673866  |
| Hcrtr1_j1   | 0.300008  | 0.0514067       | -2.54497   | 0.0330657 | 0.198211  |
| Tinagl1     | 2.69819   | 3.19628         | 0.2444     | 0.156143  | 0.489534  |
| Serinc2_j1  | 9.0457    | 11.0336         | 0          | 1         | 1         |
| Zcchc17     | 1.06906   | 1.24451         | 0          | 1         | 1         |
| XLOC_023758 | 0.129141  | 0.10431         | -0.308071  | 0.729495  | 1         |
| Ptpru_j9    | 0.0871121 | 0.0399207       | -1.12574   | 0.244091  | 1         |
| AK047558_j1 | 0.232788  | 0.261524        | 0.167928   | 0.635277  | 0.858544  |
| Epb4.1_j4   | 1.22046   | 0.932446        | -0.388329  | 0.0122283 | 0.0995614 |
| Epb4.1_j7   | 0.436279  | 0.0303806       | -3.84403   | 3.09E-10  | 2.83E-08  |
| Epb4.1_j5   | 0.175888  | 0.365916        | 1.05685    | 8.75E-05  | 0.0019115 |
| Oprd1       | 3.48141   | 2.40052         | -0.536327  | 3.87E-06  | 0.0001355 |
| Ythdf2      | 8.72036   | 8.45001         | -0.0454345 | 0.651427  | 0.86624   |
| Gmeb1_j2    | 0.143317  | 0.0497654       | 0          | 1         | 1         |
| Rab42-ps    | 0.114576  | 0.107997        | -0.0853095 | 0.934572  | 1         |
| Trnau1ap    | 4.07534   | 4.20461         | 0.045054   | 0.835819  | 0.947255  |
| Trnau1ap_j5 | 0.245692  | 0.180754        | -0.442824  | 0.649707  | 0.86543   |
| Rcc1        | 3.35044   | 4.88432         | 0          | 1         | 1         |
| Snhg3       | 8.10917   | 9.45825         | 0.222019   | 0.273634  | 0.62279   |
| Phactr4_j3  | 0.154536  | 0.147412        | 0          | 1         | 1         |
| Phactr4     | 0.702837  | 0.667235        | 0          | 1         | 1         |
| Med18       | 2.43656   | 2.27994         | -0.0958491 | 0.626254  | 0.854124  |
| Sesn2       | 2.44038   | 3.41906         | 0.48649    | 0.000755  | 0.0114285 |
| Atpif1      | 59.5389   | 59.9197         | 0          | 1         | 1         |
| Xkr8        | 1.15082   | 0.799799        | 0          | 1         | 1         |
| Ppp1r8_j2   | 0.162093  | 0.0720804       | 0          | 1         | 1         |
| Ppp1r8_j3   | 5.64338   | 6.35775         | 0          | 1         | 1         |
| Ppp1r8      | 1.60299   | 0.955999        | 0          | 1         | 1         |
| Stx12_j5    | 4.73904   | 1.74733         | 0          | 1         | 1         |
| Stx12       | 14.9319   | 13.4191         | 0          | 1         | 1         |
| Fam76a_j1   | 3.60456   | 4.13882         | 0          | 1         | 1         |
| Fam76a      | 4.56067   | 4.52484         | 0          | 1         | 1         |
| Gpr3        | 0.311928  | 0.264469        | -0.238114  | 0.617725  | 0.84955   |
| Gpr3_j1     | 0.103825  | 0.154384        | 0.572376   | 0.39481   | 1         |
| Tmem222_j2  | 23.9558   | 25.6407         | 0.0980612  | 0.395385  | 0.72052   |
| Tmem222     | 5.89403   | 5.76744         | -0.0313229 | 0.847721  | 0.951788  |
| Wdtdc1_j5   | 7.59802   | 7.64933         | 0          | 1         | 1         |

|            |             |           |            |           |           |
|------------|-------------|-----------|------------|-----------|-----------|
| Wdtdc1     | 8.46044     | 6.3049    | 0          | 1         | 1         |
| Wdtdc1_j3  | 7.42361     | 8.5545    | 0          | 1         | 1         |
| Trnp1_j1   | 316.199     | 283.184   | -0.159089  | 0.0705683 | 0.319287  |
| Trnp1      | 36.3802     | 30.3975   | -0.259201  | 0.0028637 | 0.0331929 |
| Nudc_j1    | 0.425818    | 0.421445  | 0          | 1         | 1         |
| Zdhhc18_j9 | 38.3507     | 49.958    | 0          | 1         | 1         |
| Zdhhc18_j3 | 4.9103      | 5.67708   | 0          | 1         | 1         |
| Pigv       | 0           | 0.136662  | 0          | 1         | 1         |
| Pigv_j1    | 0.277182    | 0.144346  | 0          | 1         | 1         |
| Arid1a_j2  | 1.05923     | 0.540747  | 0          | 1         | 1         |
| Rps6ka1_j1 | 2.15742     | 4.47155   | 0          | 1         | 1         |
| Rps6ka1    | 1.5335      | 2.65599   | 0          | 1         | 1         |
| Rps6ka1    | 3.05066     | 3.5564    | 0          | 1         | 1         |
| Hmgn2_j7   | 0.674721    | 0.537566  | -0.32785   | 0.565571  | 0.823908  |
| Dhdds      | 4.90315     | 5.02291   | 0          | 1         | 1         |
| Dhdds      | 18.0167     | 14.527    | 0          | 1         | 1         |
| Sh3bgrl3   | 83.2462     | 99.3961   | 0.255804   | 0.0039402 | 0.0424438 |
| Ccdc21_j2  | 0.066711    | 0.0562955 | -0.244905  | 0.81346   | 1         |
| Ccdc21     | 3.074       | 3.01893   | -0.0260781 | 0.857953  | 0.954916  |
| Gm7534_j3  | 0.529156    | 0.985273  | 0.896831   | 0.0006673 | 0.0103356 |
| Zfp593     | 5.13759     | 5.91407   | 0.203061   | 0.144056  | 0.471055  |
| Grrp1      | 0.899539    | 1.18369   | 0.396028   | 0.282949  | 0.631512  |
| Grrp1_j2   | 0.141629    | 0.165395  | 0.223801   | 0.748429  | 0.91244   |
| Grrp1_j1   | 0.133249    | 0.129592  | -0.040147  | 0.963914  | 1         |
| Pdik1l     | 1.89338     | 1.77996   | -0.0891205 | 0.592129  | 0.837679  |
| Fam54b_j3  | 14.1121     | 20.3307   | 0          | 1         | 1         |
| Fam54b     | 20.3425     | 17.5252   | 0          | 1         | 1         |
| Fam54b     | 24.1818     | 21.2064   | 0          | 1         | 1         |
| Sepn1_j2   | 0.0808055   | 0         | 0          | 1         | 1         |
| Sepn1_j3   | 0.687138    | 0.886946  | 0          | 1         | 1         |
| Man1c1_j1  | 0.498677    | 0.516947  | 0          | 1         | 1         |
| Man1c1     | 5.32901     | 6.30804   | 0          | 1         | 1         |
| Ldlrap1_j1 | 0.165685    | 0.0924798 | -0.84123   | 0.274739  | 0.623768  |
| Ldlrap1    | 0.237209    | 0.356842  | 0.589129   | 0.126743  | 0.443429  |
| Tmem57_j1  | 1.39093     | 1.40707   | 0          | 1         | 1         |
| Tmem57_j2  | 2.16046     | 2.98058   | 0          | 1         | 1         |
| Tmem57     | 8.25935     | 8.11034   | 0          | 1         | 1         |
| Tmem50a    | 78.0021     | 77.0185   | 0          | 1         | 1         |
| Clic4      | 22.2425     | 28.4908   | 0          | 1         | 1         |
| Srrm1_j3   | 2.82837     | 2.89396   | 0          | 1         | 1         |
| Srrm1      | 10.8249     | 10.6375   | 0          | 1         | 1         |
| Rcan3_j2   | 4.89613     | 5.11871   | 0          | 1         | 1         |
| Rcan3_j1   | 4.08781     | 2.59685   | 0          | 1         | 1         |
| Grhl3_j4   | 1.88606     | 1.28524   | -0.55333   | 0.0158271 | 0.119366  |
| Grhl3      | 0.000189221 | 0.0623344 | 8.36381    | 0.810164  | 1         |
| Pnrc2      | 11.6816     | 13.6853   | 0.22839    | 0.0556929 | 0.275839  |
| Lypla2     | 54.2458     | 56.344    | 0.0547522  | 0.543315  | 0.810795  |

|                  |           |                 |             |           |           |
|------------------|-----------|-----------------|-------------|-----------|-----------|
| 1110049F12Rik_j3 | 1.2699    | 1.26098         | 0           | 1         | 1         |
| 1110049F12Rik_j2 | 6.98125   | 9.3792          | 0           | 1         | 1         |
| 1110049F12Rik    | 8.76533   | 8.95719         | 0           | 1         | 1         |
| Tceb3            | 6.76434   | 7.4163          | 0.13275     | 0.21657   | 0.562689  |
| Rpl11_j4         | 0.532696  | 0.569771        | 0.0970721   | 0.785399  | 0.928136  |
| Kdm1a_j1         | 5.85753   | 7.32176         | 0           | 1         | 1         |
| Kdm1a_j2         | 5.00203   | 4.20026         | 0           | 1         | 1         |
| Ephb2_j3         | 0.0844782 | 0 -1.79769e+308 | 0.0006789   |           | 1         |
| C1qb             | 1.60941   | 3.75363         | 0           | 1         | 1         |
| C1qc_j1          | 7.46897   | 18.8568         | 1.3361      | 0         | 0         |
| C1qc             | 1.89141   | 4.30217         | 1.18561     | 2.86E-08  | 1.81E-06  |
| C1qa             | 1.54653   | 3.81101         | 1.30113     | 6.02E-06  | 0.0001992 |
| Epha8_j2         | 0.108602  | 0.0758414       | -0.517995   | 0.558246  | 1         |
| Epha8_j4         | 0.0777283 | 0.0143136       | -2.44105    | 0.142702  | 1         |
| Zbtb40_j3        | 0.15572   | 0.455432        | 1.54828     | 0.0064754 | 0.0620406 |
| Zbtb40_j4        | 0.128619  | 0.159127        | 0.307074    | 0.546833  | 0.81317   |
| Zbtb40_j1        | 0.609402  | 0.607334        | -0.00490456 | 0.982065  | 0.994576  |
| Cdc42_j1         | 9.79531   | 6.76646         | 0           | 1         | 1         |
| Cdc42_j2         | 2.9488    | 1.74297         | 0           | 1         | 1         |
| Cdc42_j6         | 41.6057   | 29.1747         | 0           | 1         | 1         |
| Alpl             | 3.96994   | 3.45716         | -0.19953    | 0.236651  | 0.583799  |
| Pink1_j2         | 38.591    | 34.3713         | 0           | 1         | 1         |
| Pink1_j1         | 47.5292   | 46.2401         | 0           | 1         | 1         |
| Cda              | 4.97832   | 6.11221         | 0.296034    | 0.184637  | 0.525051  |
| Otud3            | 3.01439   | 3.00232         | -0.00578632 | 0.963442  | 0.989786  |
| Htr6             | 0.140602  | 0.202483        | 0.526181    | 0.415231  | 0.733161  |
| Nbl1_j1          | 54.0007   | 64.4931         | 0           | 1         | 1         |
| Nbl1             | 29.7348   | 31.1489         | 0           | 1         | 1         |
| 2310028O11Rik    | 5.38565   | 4.16172         | 0           | 1         | 1         |
| Gm16287_j1       | 0.267765  | 0.163355        | -0.712953   | 0.367636  | 0.701064  |
| Pqlc2_j2         | 1.78758   | 1.89824         | 0           | 1         | 1         |
| Pqlc2            | 0.228411  | 0.0957977       | 0           | 1         | 1         |
| Igsf21_j1        | 3.29865   | 1.78697         | 0           | 1         | 1         |
| Igsf21_j3        | 0.338964  | 0.985536        | 0           | 1         | 1         |
| Igsf21           | 7.0234    | 4.04215         | 0           | 1         | 1         |
| Arhgef10_j6      | 0.337819  | 0.220964        | 0           | 1         | 1         |
| Arhgef10_j3      | 16.1236   | 14.5635         | 0           | 1         | 1         |
| Padi4_j1         | 0.169869  | 0.0746083       | -1.18701    | 0.294361  | 0.641101  |
| Crocc_j8         | 0.220899  | 9.27E-05        | -11.2181    | 0.745269  | 0.911274  |
| Crocc            | 0.116566  | 0.126862        | 0.122115    | 0.813886  | 1         |
| Crocc_j12        | 0.421348  | 0.131545        | -1.67946    | 0.0555733 | 0.275486  |
| Necap2_j2        | 0.403416  | 0               | 0           | 1         | 1         |
| Necap2_j1        | 1.74711   | 2.34452         | 0           | 1         | 1         |
| Necap2           | 4.47578   | 4.99239         | 0           | 1         | 1         |
| D4Ertd22e_j3     | 0.517171  | 0.795935        | 0           | 1         | 1         |
| D4Ertd22e_j4     | 0.614516  | 0.717267        | 0           | 1         | 1         |
| D4Ertd22e        | 6.84861   | 6.16964         | 0           | 1         | 1         |



|                  |           |                 |            |           |           |
|------------------|-----------|-----------------|------------|-----------|-----------|
| Gm694            | 0.244092  | 0.340981        | 0.482268   | 0.341626  | 0.681532  |
| Spen_j4          | 0.590323  | 0.719897        | 0          | 1         | 1         |
| Spen_j5          | 0.811625  | 0.912794        | 0          | 1         | 1         |
| Fblim1_j1        | 0.501464  | 0.384873        | -0.381764  | 0.344263  | 0.684009  |
| Plekhm2_j5       | 9.06971   | 10.7661         | 0          | 1         | 1         |
| Plekhm2          | 4.65339   | 5.27237         | 0          | 1         | 1         |
| Plekhm2_j7       | 11.4437   | 11.8213         | 0          | 1         | 1         |
| Ddi2_j2          | 0.103815  | 0.149059        | 0          | 1         | 1         |
| Ddi2             | 5.71505   | 4.18171         | 0          | 1         | 1         |
| Dnajc16          | 3.1459    | 1.46525         | 0          | 1         | 1         |
| Dnajc16_j3       | 2.05256   | 2.47173         | 0          | 1         | 1         |
| Efhd2            | 3.1384    | 3.62836         | 0          | 1         | 1         |
| Tmem51           | 6.95416   | 6.09954         | -0.189174  | 0.199672  | 0.542685  |
| Tmem51_j3        | 0.800407  | 0.712507        | -0.167829  | 0.639066  | 0.860252  |
| 9030409G11Rik_j5 | 0.280115  | 0.00338277      | 0          | 1         | 1         |
| 9030409G11Rik_j4 | 5.44099   | 5.50551         | 0          | 1         | 1         |
| 9030409G11Rik    | 1.13376   | 0.637438        | 0          | 1         | 1         |
| AK018156_j3      | 0.0523846 | 0.0806986       | 0.623403   | 0.547813  | 1         |
| AK018156_j5      | 0.220372  | 0 -1.79769e+308 | 0.005466   | 0.0543019 |           |
| Prdm2_j1         | 0.0947349 | 0               | 0          | 1         | 1         |
| Prdm2_j2         | 0.910281  | 0.362999        | 0          | 1         | 1         |
| Pdpn             | 9.23787   | 10.8778         | 0.235753   | 0.0663975 | 0.307848  |
| Vps13d_j8        | 1.0355    | 1.04064         | 0          | 1         | 1         |
| Vps13d_j7        | 0.113938  | 0.194111        | 0          | 1         | 1         |
| Vps13d_j9        | 0.663746  | 0.574046        | 0          | 1         | 1         |
| Tnfrsf1b_j1      | 0.906004  | 1.20337         | 0          | 1         | 1         |
| Tnfrsf1b         | 0.266097  | 0.992656        | 0          | 1         | 1         |
| Tnfrsf8_j1       | 9.32E-06  | 0.578518        | 15.9219    | 0.984391  | 0.995386  |
| 2610305D13Rik_j1 | 0.457674  | 0.0351613       | 0          | 1         | 1         |
| Gm13157_j6       | 1.27348   | 0.428242        | 0          | 1         | 1         |
| Zfp933           | 1.12498   | 1.01659         | 0          | 1         | 1         |
| Miip_j4          | 7.05E-05  | 0.0903801       | 0          | 1         | 1         |
| Miip_j3          | 1.98099   | 2.01624         | 0          | 1         | 1         |
| Miip             | 1.33741   | 1.32458         | 0          | 1         | 1         |
| Mfn2_j1          | 22.4949   | 28.0769         | 0          | 1         | 1         |
| Mfn2             | 27.7259   | 23.5025         | 0          | 1         | 1         |
| Plod1            | 5.93455   | 6.21648         | 0.0669582  | 0.61762   | 0.849545  |
| Agtrap           | 10.2076   | 10.5342         | 0.0454402  | 0.661154  | 0.871517  |
| 2610109H07Rik    | 0.656667  | 1.76687         | 1.42797    | 6.66E-15  | 1.30E-12  |
| Fbxo44           | 25.5176   | 20.6394         | 0          | 1         | 1         |
| Fbxo44_j2        | 0.769708  | 0.675528        | 0          | 1         | 1         |
| Ptchd2           | 6.43272   | 4.88095         | -0.398265  | 6.59E-05  | 0.0015096 |
| Tardbp           | 7.0226    | 5.8207          | 0          | 1         | 1         |
| Pex14            | 28.166    | 27.7497         | -0.0214802 | 0.825753  | 0.943781  |
| Apitd1           | 2.18148   | 2.4454          | 0.164763   | 0.526193  | 0.800979  |
| Rpsa-ps12        | 20.4506   | 22.9757         | 0.167961   | 0.153152  | 0.485324  |
| Pgd              | 20.6712   | 17.9179         | 0          | 1         | 1         |

|                  |           |           |               |           |           |
|------------------|-----------|-----------|---------------|-----------|-----------|
| Kif1b            | 17.5819   | 10.0458   | 0             | 1         | 1         |
| Kif1b_j7         | 10.255    | 12.178    | 0             | 1         | 1         |
| Ube4b            | 9.53103   | 9.1098    | 0             | 1         | 1         |
| Rbp7             | 0.880451  | 0.416358  | -1.08042      | 0.0112983 | 0.0938069 |
| Nmnat1           | 1.10362   | 0.741213  | 0             | 1         | 1         |
| XLOC_023915      | 0.268187  | 0.112156  | -1.25773      | 0.181919  | 0.522252  |
| Pik3cd_j1        | 10.0025   | 10.438    | 0.0614885     | 0.514938  | 0.793837  |
| Pik3cd           | 1.11833   | 0.787706  | -0.505617     | 0.0658758 | 0.306245  |
| Tmem201_j4       | 2.24773   | 1.9751    | 0             | 1         | 1         |
| Tmem201          | 5.14307   | 4.81414   | 0             | 1         | 1         |
| Slc25a33         | 18.0864   | 14.1906   | -0.349974     | 0.0030623 | 0.0350039 |
| Gm13073_j1       | 0.107067  | 0.0768064 | -0.479215     | 0.544618  | 1         |
| Spsb1_j1         | 1.60281   | 2.10512   | 0             | 1         | 1         |
| Spsb1_j3         | 2.70324   | 1.02875   | 0             | 1         | 1         |
| Spsb1            | 4.04728   | 4.9957    | 0             | 1         | 1         |
| H6pd             | 0.35264   | 0.348998  | -0.0149768    | 0.95801   | 0.987996  |
| Slc45a1          | 33.6825   | 29.9872   | -0.167652     | 0.0731877 | 0.325768  |
| Park7_j1         | 2.66591   | 3.29455   | 0.305455      | 0.349447  | 0.687145  |
| Park7_j2         | 0.438272  | 0.615753  | 0.490524      | 0.474854  | 0.77086   |
| Per3_j2          | 0.348618  | 0.193024  | -0.852868     | 0.0689657 | 0.314824  |
| Per3_j3          | 0.288272  | 0         | -1.79769e+308 | 7.76E-13  | 1.12E-10  |
| Vamp3            | 1.88256   | 1.27499   | 0             | 1         | 1         |
| Camta1_j5        | 3.21287   | 1.07102   | 0             | 1         | 1         |
| Camta1_j4        | 11.2005   | 7.07367   | 0             | 1         | 1         |
| Thap3            | 6.02413   | 6.3295    | 0.07134       | 0.669054  | 0.874746  |
| Phf13_j2         | 2.07517   | 2.92018   | 0             | 1         | 1         |
| Phf13            | 0.886371  | 0.650505  | 0             | 1         | 1         |
| Zbtb48_j1        | 0.290401  | 0.19565   | -0.569769     | 0.456797  | 0.760049  |
| Espn_j2          | 0.0626121 | 0.0354639 | 0             | 1         | 1         |
| Hes3_j5          | 0.114717  | 0.073259  | -0.646998     | 0.533752  | 1         |
| Kcnab2_j3        | 88.3723   | 57.8775   | 0             | 1         | 1         |
| Ajap1_j1         | 0.0510361 | 0.0721064 | 0.498609      | 0.69342   | 1         |
| Dffb_j1          | 0.812647  | 0.491352  | -0.725871     | 0.0739224 | 0.327783  |
| Dffb_j3          | 0.308735  | 0.201261  | -0.617299     | 0.301855  | 0.648067  |
| 1190007F08Rik_j1 | 0.0840684 | 0.0703995 | -0.255998     | 0.720244  | 1         |
| 1190007F08Rik    | 0.564231  | 0.459499  | -0.296222     | 0.288239  | 0.636106  |
| Tprgl_j3         | 2.7048    | 4.57317   | 0             | 1         | 1         |
| Tprgl            | 23.6478   | 25.0132   | 0             | 1         | 1         |
| Arhgef16_j1      | 0.382748  | 0.556224  | 0.539272      | 0.0503102 | 0.259342  |
| 5930403L14Rik    | 5.60511   | 4.87137   | -0.202416     | 0.0780936 | 0.338561  |
| 2810405K02Rik    | 17.4222   | 18.472    | 0.0844128     | 0.411221  | 0.730635  |
| Tnfrsf14_j1      | 0.0869054 | 0         | -1.79769e+308 | 0.0035557 | 1         |
| Plch2_j3         | 0.40082   | 0.368712  | -0.120459     | 0.792019  | 0.930585  |
| Plch2_j5         | 0.0495076 | 0         | -1.79769e+308 | 0.0050649 | 1         |
| Plch2_j8         | 0.28829   | 0.490476  | 0.766663      | 0.196334  | 0.539086  |
| Rer1             | 27.0316   | 26.7408   | 0             | 1         | 1         |
| Ski              | 5.25371   | 4.95292   | 0             | 1         | 1         |

|                  |           |           |              |           |           |
|------------------|-----------|-----------|--------------|-----------|-----------|
| Ski_j2           | 1.72598   | 1.92938   | 0            | 1         | 1         |
| Prkcj_j1         | 0.281046  | 0.294648  | 0.0681884    | 0.852071  | 0.953028  |
| Prkcj_j8         | 0.236582  | 0.160292  | -0.561633    | 0.121764  | 0.434527  |
| Gabrd            | 0.272834  | 0.211264  | -0.368973    | 0.520864  | 0.797932  |
| Mib2_j4          | 0.0219932 | 0.321389  | 3.86919      | 3.50E-05  | 0.0008803 |
| Mib2_j5          | 0.316231  | 0.0931797 | -1.76289     | 0.0016507 | 0.0213986 |
| Atad3a_j7        | 2.35313   | 2.97123   | 0            | 1         | 1         |
| Atad3a_j5        | 0.782145  | 1.40388   | 0            | 1         | 1         |
| Atad3a_j1        | 1.03109   | 1.11005   | 0            | 1         | 1         |
| Atad3a           | 1.21889   | 1.23518   | 0            | 1         | 1         |
| Vwa1             | 5.08876   | 4.51933   | 0            | 1         | 1         |
| Vwa1_j1          | 15.6516   | 17.6802   | 0            | 1         | 1         |
| Gltpd1           | 32.9175   | 30.6175   | -0.104501    | 0.261808  | 0.610988  |
| Agrn_j15         | 5.47331   | 9.21189   | 0            | 1         | 1         |
| Agrn_j16         | 1.97771   | 2.65506   | 0            | 1         | 1         |
| Agrn_j17         | 2.38141   | 2.00897   | 0            | 1         | 1         |
| Agrn_j18         | 2.24438   | 3.53653   | 0            | 1         | 1         |
| lsg15            | 2.57441   | 3.4832    | 0.436169     | 0.141924  | 0.46851   |
| Plekhn1_j9       | 0.122667  | 0.187719  | 0            | 1         | 1         |
| Al838599_j3      | 0.088364  | 0.0701211 | -0.333609    | 0.793556  | 1         |
| Tgs1_j3          | 1.75969   | 1.72107   | 0            | 1         | 1         |
| Lyn_j1           | 0.27943   | 0.552384  | 0.983185     | 0.0414518 | 0.229352  |
| Chchd7           | 6.27578   | 7.8022    | 0            | 1         | 1         |
| Chchd7           | 4.20219   | 4.8884    | 0            | 1         | 1         |
| Sdcbp            | 40.589    | 40.4426   | 0            | 1         | 1         |
| Sdcbp_j1         | 0.395571  | 0.484794  | 0            | 1         | 1         |
| Rab2a_j1         | 8.69549   | 11.1801   | 0            | 1         | 1         |
| Chd7_j5          | 0.397712  | 0.341832  | -0.218436    | 1         | 1         |
| Clvs1_j1         | 2.89748   | 3.33714   | 0            | 1         | 1         |
| 4930412C18Rik_j4 | 0.24758   | 0.279273  | 0.17378      | 0.708344  | 0.893803  |
| 4930412C18Rik_j9 | 0.304512  | 0.174978  | -0.799327    | 0.120587  | 0.432541  |
| 4930412C18Rik_j8 | 0.220839  | 0.119317  | -0.888199    | 0.160755  | 0.495357  |
| XLOC_022700      | 0.0791542 | 0.0627966 | -0.33398     | 0.743852  | 1         |
| Rbm12b           | 0.269303  | 0.360291  | 0            | 1         | 1         |
| Tmem55a_j1       | 0         | 0.811777  | 1.79769e+308 | 4.48E-06  | 0.0001533 |
| AK080160_j4      | 0.104983  | 0.375512  | 1.83871      | 0.0202149 | 0.141938  |
| Mmp16            | 0.808362  | 2.28015   | 0            | 1         | 1         |
| Ggh_j1           | 1.58047   | 2.40079   | 0.603155     | 0.227577  | 0.574755  |
| Ccnc             | 9.12719   | 8.78491   | 0            | 1         | 1         |
| Usp45_j3         | 0.117567  | 0.0952953 | 0            | 1         | 1         |
| Sfrs18_j10       | 8.51955   | 8.38696   | 0            | 1         | 1         |
| Coq3             | 1.6832    | 1.82861   | 0            | 1         | 1         |
| XLOC_022742      | 0.109957  | 0.0887679 | 0            | 1         | 1         |
| Map3k7           | 0.713641  | 0.703089  | 0            | 1         | 1         |
| Bach2_j6         | 0.163027  | 0.305261  | 0.904936     | 0.0395795 | 0.222296  |
| Mdn1_j6          | 2.43946   | 3.34374   | 0            | 1         | 1         |
| Rragd_j1         | 1.2247    | 2.58106   | 0            | 1         | 1         |

|             |             |           |               |           |           |
|-------------|-------------|-----------|---------------|-----------|-----------|
| Srsf13b_j2  | 0.542355    | 0.55774   | 0             | 1         | 1         |
| Gm12371     | 1.08867     | 0.654482  | 0             | 1         | 1         |
| Dnaja1_j3   | 0.432881    | 0.292549  | 0             | 1         | 1         |
| Nfx1_j3     | 1.89763     | 2.60951   | 0             | 1         | 1         |
| Ube2r2_j3   | 3.83989     | 6.55934   | 0.772487      | 0.0457464 | 0.24483   |
| Ubap1_j1    | 16.403      | 16.1435   | -0.0230123    | 0.854583  | 0.953957  |
| Nudt2_j3    | 0.127076    | 0.278631  | 0             | 1         | 1         |
| Il11ra1_j1  | 5.20138     | 5.3883    | 0.050936      | 0.704678  | 0.892088  |
| Gm2506_j1   | 1.16373     | 1.18638   | 0.0278108     | 0.959754  | 0.988566  |
| Gm2506      | 4.34259     | 3.89231   | -0.157932     | 0.499441  | 0.784604  |
| XLOC_022782 | 1.0513      | 0.798089  | -0.397546     | 0.0279125 | 0.177103  |
| N28178_j4   | 74.2597     | 60.8045   | 0             | 1         | 1         |
| N28178_j3   | 0.458403    | 0.897364  | 0             | 1         | 1         |
| N28178_j5   | 1.77803     | 1.35231   | 0             | 1         | 1         |
| N28178_j16  | 37.1526     | 28.5786   | 0             | 1         | 1         |
| Unc13b_j1   | 0.331979    | 0.0831434 | -1.99742      | 0.0019525 | 0.0245338 |
| Unc13b_j14  | 0.821764    | 1.05368   | 0.358646      | 0.29193   | 0.638801  |
| Atp8b5_j12  | 0.0884422   | 0.136384  | 0.62487       | 0.688329  | 1         |
| Rusc2_j2    | 0.1709      | 0         | 0             | 1         | 1         |
| Rusc2_j1    | 0.0927734   | 0         | 0             | 1         | 1         |
| Npr2        | 26.9945     | 24.4502   | 0             | 1         | 1         |
| Npr2_j6     | 0.181901    | 0.425313  | 0             | 1         | 1         |
| Tmem8b_j2   | 0           | 0.0602509 | 1.79769e+308  | 0.0083064 | 1         |
| Frmpr1      | 17.9737     | 12.237    | 0             | 1         | 1         |
| AK044089_j1 | 0           | 0.161375  | 1.79769e+308  | 0.0433637 | 0.236335  |
| Tmod1_j2    | 0.766995    | 0         | -1.79769e+308 | 6.35E-07  | 2.79E-05  |
| XLOC_022822 | 0.0900764   | 0.0453451 | -0.990204     | 0.704962  | 1         |
| Nans_j2     | 8.54985     | 7.76828   | -0.138304     | 0.467941  | 0.766747  |
| Stx17_j1    | 1.15267     | 1.7061    | 0             | 1         | 1         |
| Invs_j1     | 0.753154    | 0.810505  | 0.105877      | 0.73981   | 0.908775  |
| Invs_j2     | 1.18907     | 1.27763   | 0             | 1         | 1         |
| Rnf20_j2    | 1.44832     | 1.29789   | 0             | 1         | 1         |
| Smc2_j7     | 0.556022    | 0.451552  | -0.300249     | 0.494837  | 0.782608  |
| Gm12482     | 3.02664     | 3.42815   | 0.179711      | 0.412324  | 0.731395  |
| Fktn_j6     | 0           | 0.429786  | 0             | 1         | 1         |
| Zfp462_j2   | 0.104286    | 0.0423573 | 0             | 1         | 1         |
| Zfp462_j6   | 0.526921    | 1.22914   | 0             | 1         | 1         |
| Rad23b_j1   | 48.6082     | 54.7257   | 0             | 1         | 1         |
| Akap2_j2    | 3.24385     | 5.03296   | 0.633699      | 3.43E-07  | 1.59E-05  |
| Akap2_j5    | 0.125768    | 0.401308  | 1.67395       | 0.0045563 | 0.0473672 |
| Bspry       | 0.000693636 | 0.0852508 | 6.94139       | 0.669285  | 1         |
| Rgs3_j3     | 8.46412     | 8.56352   | 0             | 1         | 1         |
| Rgs3_j1     | 3.77262     | 3.825     | 0             | 1         | 1         |
| Rgs3_j2     | 12.1207     | 11.8351   | 0             | 1         | 1         |
| XLOC_022880 | 0.0362675   | 0.0788014 | 1.11954       | 0.401157  | 1         |
| XLOC_022880 | 0.101566    | 0.0718225 | -0.499907     | 0.60174   | 1         |
| Col27a1_j12 | 0.229692    | 0.24942   | 0.118875      | 0.780225  | 0.925835  |

|                  |           |           |               |            |           |           |
|------------------|-----------|-----------|---------------|------------|-----------|-----------|
| Col27a1_j13      | 0         | 0.243463  | 1.79769e+308  |            | 0.0003354 | 0.0058544 |
| Col27a1_j15      | 0.0909898 | 0.231673  |               | 1.34831    | 0.0740005 | 0.327958  |
| 6330416G13Rik_j3 | 2.32684   | 2.17326   |               | 0          | 1         | 1         |
| 6330416G13Rik_j7 | 0.247374  | 0.469123  |               | 0          | 1         | 1         |
| AK131821         | 0.138351  | 0.108316  |               | -0.353082  | 0.746921  | 0.911809  |
| XLOC_022897      | 0.122641  | 0.183387  |               | 0.580448   | 0.687175  | 0.883705  |
| Kdm4c            | 2.92209   | 2.562     |               | -0.18973   | 0.215964  | 0.561743  |
| Kdm4c_j3         | 2.31974   | 1.83461   |               | -0.338488  | 0.273092  | 0.622078  |
| Tyrp1            | 0.469884  | 0.618063  |               | 0          | 1         | 1         |
| XLOC_022910      | 0.0620996 | 0.0624678 |               | 0.00852726 | 0.994013  | 1         |
| XLOC_022911      | 0.257861  | 0.0317895 |               | 0          | 1         | 1         |
| Cntln_j5         | 1.56761   | 1.04103   |               | -0.590562  | 0.0034475 | 0.038478  |
| Cntln_j6         | 0         | 0.29931   | 1.79769e+308  |            | 2.01E-05  | 0.0005568 |
| Sh3gl2_j3        | 28.217    | 15.1413   |               | 0          | 1         | 1         |
| Acer2_j2         | 0.171421  | 0.0920501 |               | -0.897054  | 0.462018  | 0.763059  |
| BC042782_j1      | 0.202664  | 0.340172  |               | 0          | 1         | 1         |
| BC042782_j3      | 0.0893589 | 0.180639  |               | 0          | 1         | 1         |
| XLOC_022929      | 0.238774  | 0.293353  |               | 0          | 1         | 1         |
| Fggy_j7          | 0.176311  | 0.548571  |               | 1.63756    | 0.0192629 | 0.137392  |
| Fggy_j6          | 1.38406   | 0.975958  |               | -0.504012  | 0.125723  | 0.441571  |
| Fggy             | 2.46938   | 3.31662   |               | 0.425564   | 0.0389626 | 0.220129  |
| Hook1_j4         | 0         | 0.0802988 | 1.79769e+308  |            | 0.0501116 | 1         |
| Nfia_j1          | 0.0524573 | 0.14762   |               | 1.49268    | 0.0071805 | 1         |
| Nfia_j2          | 0.0735442 | 0.0874205 |               | 0.249361   | 0.67099   | 1         |
| Inadl            | 7.56056   | 4.69245   |               | 0          | 1         | 1         |
| Foxd3            | 2.21246   | 2.56308   |               | 0          | 1         | 1         |
| Efcab7_j2        | 0         | 0.0482769 | 1.79769e+308  |            | 0.142971  | 1         |
| AK002929_j5      | 0.0804962 | 0.0997365 |               | 0.3092     | 0.777712  | 1         |
| Sgip1_j2         | 0.316196  | 0.798456  |               | 0          | 1         | 1         |
| Sgip1            | 1.12546   | 0.430366  |               | 0          | 1         | 1         |
| Sgip1_j9         | 0.0876678 | 0         |               | 0          | 1         | 1         |
| Tctex1d1_j7      | 0.0688025 | 0.0169122 |               | -2.0244    | 0.355871  | 1         |
| Mier1            | 0.354866  | 0.188083  |               | -0.915907  | 0.0462427 | 0.246485  |
| Mier1            | 0.109443  | 0.11328   |               | 0.0497134  | 0.938709  | 1         |
| Oma1_j3          | 0         | 0.330165  | 1.79769e+308  |            | 0.0549124 | 0.273295  |
| 1700024P16Rik_j7 | 0.164676  | 0.127876  |               | -0.364878  | 0.728356  | 0.903681  |
| Ppap2b_j1        | 9.40292   | 8.96648   |               | 0          | 1         | 1         |
| Ttc22            | 0.0709461 | 0.0242339 |               | -1.54969   | 0.30085   | 1         |
| Ttc22_j1         | 0.273883  | 0         | -1.79769e+308 |            | 1.76E-06  | 6.76E-05  |
| Ttc22_j2         | 0.235641  | 0.346039  |               | 0.554345   | 0.215937  | 0.561703  |
| Pars2_j1         | 0.379917  | 0.62758   |               | 0.724117   | 0.091495  | 0.371729  |
| Fam151a_j3       | 0.76799   | 0.514197  |               | 0          | 1         | 1         |
| Fam151a_j1       | 1.86966   | 2.87293   |               | 0          | 1         | 1         |
| Ssbp3            | 1.99704   | 2.66745   |               | 0          | 1         | 1         |
| mFLJ00377_j3     | 0.345675  | 0.859749  |               | 1.3145     | 0.0006701 | 0.0103725 |
| XLOC_022974      | 0.243197  | 0.278592  |               | 0.196032   | 0.677697  | 0.878835  |
| Tmem48           | 1.36609   | 1.00507   |               | 0          | 1         | 1         |

|                  |           |                       |            |           |           |
|------------------|-----------|-----------------------|------------|-----------|-----------|
| Glis1_j4         | 0.0560348 | 0.0712783             | 0.347141   | 0.777152  | 1         |
| Txndc12          | 10.2611   | 11.283                | 0.136965   | 0.304741  | 0.65013   |
| Eps15            | 0.362518  | 0.44282               | 0          | 1         | 1         |
| Ttc39a           | 4.42422   | 4.12336               | 0          | 1         | 1         |
| Bend5_j2         | 0.477599  | 0.6392                | 0.420469   | 0.3789    | 0.710432  |
| Agbl4_j2         | 0.533164  | 0.580984              | 0.12392    | 0.833212  | 0.946329  |
| 9130206I24Rik_j7 | 0.0741447 | 0 -1.79769e+308       |            | 0.104156  | 1         |
| 4732418C07Rik    | 1.2282    | 1.95208               | 0          | 1         | 1         |
| Atpaf1_j3        | 0.0896582 | 0.0117378             | -2.93327   | 0.408471  | 1         |
| Lrrc41_j2        | 0.785783  | 1.53631               | 0          | 1         | 1         |
| Pomgnt1          | 21.5355   | 21.347                | -0.0126868 | 0.895302  | 0.966918  |
| Pik3r3_j1        | 0.142446  | 0.0525988             | 0          | 1         | 1         |
| Ipp_j1           | 0.317151  | 0.29993               | -0.0805445 | 0.893979  | 0.966325  |
| Prdx1_j1         | 1.12473   | 1.34588               | 0.258974   | 0.349267  | 0.687028  |
| AK078255_j1      | 0.0490726 | 0.0542857             | 0.145657   | 0.913598  | 1         |
| Hectd3           | 13.7197   | 13.1538               | -0.0607712 | 0.533844  | 0.805306  |
| Ptch2_j5         | 0.0470165 | 0.0267647             | -0.812834  | 0.721338  | 1         |
| Ptch2_j6         | 0         | 0.232374 1.79769e+308 |            | 0.027024  | 0.173499  |
| XLOC_023028      | 0.0970597 | 0.147884              | 0.607521   | 0.55785   | 1         |
| Eri3_j4          | 9.36847   | 11.9833               | 0          | 1         | 1         |
| Slc6a9_j3        | 0.155082  | 0.216146              | 0.478972   | 0.380943  | 0.711636  |
| Hyi              | 2.2347    | 2.44826               | 0.131676   | 0.498809  | 0.78413   |
| Ebna1bp2_j2      | 0.542922  | 0.0776803             | 0          | 1         | 1         |
| Slc2a1_j1        | 0.394954  | 2.91103               | 0          | 1         | 1         |
| Foxj3            | 0.213479  | 0.000835382           | 0          | 1         | 1         |
| Krc_j1           | 1.25232   | 3.7581                | 0          | 1         | 1         |
| Krc              | 3.09974   | 3.41717               | 0          | 1         | 1         |
| Krc_j2           | 2.84967   | 1.98992               | 0          | 1         | 1         |
| XLOC_023043      | 0.772121  | 0.860924              | 0          | 1         | 1         |
| Scmh1_j3         | 0.398545  | 0.465484              | 0          | 1         | 1         |
| Rims3_j2         | 16.9627   | 17.2513               | 0          | 1         | 1         |
| Rims3_j3         | 11.5782   | 11.7779               | 0          | 1         | 1         |
| Col9a2           | 2.01127   | 1.96746               | -0.0317729 | 0.873806  | 0.959888  |
| Trit1_j2         | 0.2307    | 0.341897              | 0.567543   | 0.387468  | 0.715266  |
| Trit1_j1         | 0.0525586 | 0.0733421             | 0.480714   | 0.757909  | 1         |
| Pabpc4_j8        | 0         | 0.506914 1.79769e+308 |            | 8.47E-06  | 0.0002682 |
| Fhl3_j3          | 0.0961945 | 3.93E-05              | -11.2582   | 0.973212  | 1         |
| Fhl3_j2          | 0.344798  | 0.453815              | 0.39635    | 0.456095  | 0.759674  |
| Mtf1_j1          | 1.72874   | 1.85676               | 0.103059   | 0.432578  | 0.744293  |
| AK134673_j5      | 0.0626241 | 0 -1.79769e+308       |            | 0.0108381 | 1         |
| AK134673_j8      | 0.131448  | 0.218367              | 0.732269   | 0.267763  | 0.616423  |
| Rspo1_j1         | 0         | 0.370119 1.79769e+308 |            | 0.0023131 | 0.0280173 |
| Gnl2_j4          | 0.0639951 | 0                     | 0          | 1         | 1         |
| 2310005N01Rik_j2 | 0.940203  | 1.48527               | 0.659682   | 0.0031519 | 0.0358763 |
| Grik3_j2         | 0.175433  | 0.764134              | 2.1229     | 1         | 1         |
| Mrps15           | 16.0408   | 17.5246               | 0.127633   | 0.294079  | 0.640914  |
| Oscp1            | 0.313517  | 0.00789969            | -5.3106    | 0.0006582 | 0.0102217 |

|                  |           |           |              |           |           |
|------------------|-----------|-----------|--------------|-----------|-----------|
| Oscp1_j3         | 3.58417   | 2.94462   | -0.28356     | 0.132871  | 0.453727  |
| Lsm10            | 0         | 0.313737  | 0            | 1         | 1         |
| Lsm10            | 0.501626  | 0.191223  | 0            | 1         | 1         |
| XLOC_023076      | 0.142319  | 0.19943   | 0            | 1         | 1         |
| Fam176b_j2       | 0.143834  | 0.136057  | -0.080201    | 0.942151  | 0.982391  |
| Fam176b_j1       | 0.187701  | 0.120025  | -0.645103    | 0.570677  | 0.826452  |
| Zmym6_j1         | 0.80796   | 0.163462  | -2.30533     | 1.38E-07  | 7.15E-06  |
| Zmym6_j4         | 0.48771   | 1.17585   | 1.26961      | 9.66E-08  | 5.21E-06  |
| Zmym6_j7         | 0.0287351 | 0.0678225 | 1.23895      | 0.279076  | 1         |
| Dlgap3_j3        | 0.267403  | 0.239516  | -0.158896    | 0.746054  | 0.911572  |
| XLOC_023094      | 2.34918   | 2.62192   | 0.158469     | 0.587755  | 0.835072  |
| XLOC_023094      | 0.306982  | 0.320267  | 0.0611176    | 0.876233  | 0.960645  |
| mKIAA1884_j1     | 0.9729    | 1.57366   | 0            | 1         | 1         |
| mKIAA1884_j2     | 0.131885  | 0.100295  | 0            | 1         | 1         |
| Csmd2_j6         | 0         | 0.0740103 | 0            | 1         | 1         |
| Csmd2_j7         | 1.4584    | 1.4535    | 0            | 1         | 1         |
| Phc2_j1          | 0.64193   | 1.1014    | 0            | 1         | 1         |
| Phc2_j2          | 9.32506   | 9.13495   | 0            | 1         | 1         |
| A3galt2_j1       | 4.23782   | 4.35893   | 0            | 1         | 1         |
| Ak2              | 5.55564   | 7.96682   | 0.52005      | 0.0005995 | 0.0094781 |
| Tmem54           | 0.433916  | 0.630092  | 0.538147     | 0.17633   | 0.515018  |
| Fndc5            | 12.2951   | 9.60873   | -0.355668    | 0.0024517 | 0.029375  |
| XLOC_023107      | 0.129822  | 0.0370088 | -1.81059     | 0.355864  | 1         |
| Zbtb8os_j1       | 1.15894   | 1.09444   | -0.0826064   | 0.81603   | 0.94021   |
| Zbtb8os_j5       | 0.0678514 | 0.176574  | 1.37982      | 0.0531672 | 0.268364  |
| 2510006D16Rik_j2 | 19.9148   | 25.1028   | 0            | 1         | 1         |
| AK005651_j1      | 0.179159  | 0.113365  | -0.660268    | 0.437747  | 0.747827  |
| Bai2_j1          | 0.848564  | 0.783928  | -0.114304    | 0.663019  | 0.872395  |
| Bai2_j10         | 0.272489  | 0.311733  | 0.194109     | 0.646433  | 0.863677  |
| Bai2_j12         | 1.61406   | 1.48216   | -0.122995    | 0.686202  | 0.883052  |
| Col16a1_j4       | 1.37052   | 2.68802   | 0            | 1         | 1         |
| Col16a1_j6       | 0         | 1.42298   | 0            | 1         | 1         |
| Col16a1_j7       | 2.82055   | 2.35731   | 0            | 1         | 1         |
| Pum1_j8          | 0         | 0.119215  | 1.79769e+308 | 0.0043743 | 1         |
| Pum1_j9          | 0.503101  | 0.602048  | 0.25903      | 0.401731  | 0.724982  |
| XLOC_023128      | 0.114944  | 0.0921573 | 0            | 1         | 1         |
| Cd164l2_j2       | 0.877126  | 0.69227   | -0.341451    | 0.525549  | 0.800806  |
| Cd164l2_j3       | 0.727856  | 0.565209  | -0.364869    | 0.487673  | 0.77841   |
| Cd164l2_j4       | 1.59516   | 1.27789   | -0.319935    | 0.34474   | 0.684354  |
| Map3k6_j1        | 0.223981  | 0.361664  | 0.69127      | 0.014068  | 0.109877  |
| ASK2             | 1.46497   | 2.03786   | 0.476184     | 0.11907   | 0.429308  |
| Fam46b           | 0.643154  | 0.383088  | -0.747487    | 0.0354406 | 0.207411  |
| Nr0b2            | 0.388157  | 0.211129  | -0.878514    | 0.0947592 | 0.379546  |
| Gpatch3_j1       | 0.320556  | 0.375341  | 0.227627     | 0.552739  | 0.816696  |
| Gpatch3_j4       | 2.81938   | 3.17174   | 0.1699       | 0.321789  | 0.664878  |
| Ubxn11_j7        | 0.177018  | 0.296819  | 0.745692     | 0.226431  | 0.573564  |
| Pafah2_j4        | 0.481518  | 0.649813  | 0            | 1         | 1         |

|               |           |           |               |            |           |
|---------------|-----------|-----------|---------------|------------|-----------|
| 2610002D18Rik | 0         | 0.186081  | 1.79769e+308  | 0.0076973  | 0.0707122 |
| D4Wsu53e      | 9.96746   | 12.809    |               | 0.361858   | 0.000423  |
| Runx3_j1      | 1.55497   | 0.953763  |               | -0.705181  | 0.0059719 |
| Srsf10_j4     | 4.3486    | 4.17221   |               | -0.0597398 | 0.697142  |
| Srsf10_j5     | 10.6861   | 10.5218   |               | -0.022362  | 0.856734  |
| Fuca1         | 20.2874   | 20.2639   |               | -0.0016707 | 0.98825   |
| XLOC_023166   | 0.0278311 | 0.08711   |               | 1.64614    | 0.301217  |
| E2f2_j1       | 3.86E-05  | 0.391289  |               | 13.3066    | 0.918398  |
| E2f2_j3       | 0.350579  | 0.151909  |               | -1.20653   | 0.0232546 |
| Asap3         | 1.74803   | 1.98983   |               | 0.186918   | 0.245454  |
| Hnrnpr_j1     | 1.05131   | 1.07969   |               | 0.0384244  | 0.872996  |
| Hnrnpr_j2     | 8.32873   | 9.1354    |               | 0.133371   | 0.304674  |
| Gm17388       | 0.177067  | 0.222592  |               | 0.330107   | 0.628715  |
| Htr1d_j3      | 0.204081  | 0.222637  |               | 0.125552   | 0.748221  |
| Htr1d_j4      | 6.85965   | 5.15192   |               | -0.413027  | 0.0020686 |
| Luzp1_j1      | 0.766958  | 0.925005  |               | 0          | 1         |
| XLOC_023182   | 0.214964  | 0.159834  |               | -0.427527  | 0.667405  |
| Hspg2_j3      | 0.0816606 | 0.0556076 |               | -0.554358  | 0.701783  |
| Usp48_j10     | 1.06525   | 0.820638  |               | -0.376372  | 0.185553  |
| Rap1gap_j3    | 9.15405   | 6.6505    |               | 0          | 1         |
| Eif4g3_j3     | 3.07872   | 3.47225   |               | 0.173541   | 0.154642  |
| Eif4g3_j2     | 5.22186   | 3.55488   |               | -0.554761  | 1.14E-06  |
| Eif4g3_j7     | 3.17051   | 2.49772   |               | -0.344103  | 0.0081818 |
| Eif4g3_j18    | 14.3057   | 14.8791   |               | 0.0566953  | 0.554007  |
| Kif17_j2      | 0.652086  | 0.913584  |               | 0          | 1         |
| Kif17_j1      | 0         | 0.294077  |               | 0          | 1         |
| Kif17_j2      | 0.132538  | 0.0702864 |               | -0.915087  | 0.220092  |
| Kif17_j1      | 0.0927289 | 0.0455794 |               | -1.02464   | 0.355148  |
| Camk2n1_j2    | 8.91149   | 9.11313   |               | 0.0322795  | 0.790185  |
| Pla2g2d       | 0.0588371 | 0.20678   |               | 1.8133     | 0.0634965 |
| Ubr4_j8       | 0.353499  | 0         | -1.79769e+308 | 0.0013363  | 0.0180505 |
| Ubr4_j9       | 0.863237  | 0.765932  |               | -0.17254   | 0.635693  |
| Ubr4_j10      | 7.62135   | 6.96668   |               | -0.129577  | 0.166986  |
| Ubr4_j14      | 35.4571   | 41.8526   |               | 0.239243   | 0.0091151 |
| Iffo2_j3      | 0.993612  | 0.862844  |               | 0          | 1         |
| Rcc2_j5       | 4.17167   | 2.93466   |               | 0          | 1         |
| Padi2_j4      | 1.43E-05  | 0.13151   |               | 13.1713    | 0.976121  |
| Atp13a2       | 44.6595   | 46.3574   |               | 0          | 1         |
| Atp13a2_j3    | 23.242    | 27.935    |               | 0          | 1         |
| Atp13a2_j5    | 9.00202   | 13.666    |               | 0          | 1         |
| Mfap2_j1      | 0.54469   | 0.609479  |               | 0.162143   | 0.748219  |
| Fbxo42_j1     | 0         | 0.0498596 |               | 0          | 1         |
| Arhgef19_j3   | 0.875395  | 0.804935  |               | 0          | 1         |
| Arhgef19_j2   | 1.24072   | 1.23987   |               | 0          | 1         |
| Zbtb17_j1     | 0.630007  | 0.660231  |               | 0.0676046  | 0.791704  |
| Casp9_j1      | 0.903572  | 1.65417   |               | 0          | 1         |
| AK019631_j1   | 0.138865  | 0.112314  |               | -0.306143  | 0.674923  |



|                  |           |           |            |           |           |
|------------------|-----------|-----------|------------|-----------|-----------|
| AK019631         | 0.0153104 | 0.0782842 | 2.35421    | 0.150895  | 1         |
| Gm10565_j1       | 0.123771  | 0.0757254 | -0.708828  | 0.439918  | 1         |
| Gm10565_j2       | 0.0688861 | 0.117378  | 0.768881   | 0.373113  | 1         |
| Lrrc38           | 0.043374  | 0.272259  | 2.65008    | 0.0007273 | 0.011075  |
| Dhrs3_j1         | 0.433381  | 1.05278   | 1.2805     | 0.0015951 | 0.0207882 |
| Fbxo2_j2         | 23.2406   | 17.0529   | 0          | 1         | 1         |
| Mtor_j1          | 1.03716   | 0.276039  | -1.9097    | 2.66E-10  | 2.48E-08  |
| Masp2_j1         | 5.68629   | 6.17504   | 0.11896    | 0.46615   | 0.765927  |
| Casz1_j2         | 7.50728   | 5.08866   | 0          | 1         | 1         |
| Casz1_j3         | 2.60939   | 2.9136    | 0          | 1         | 1         |
| Dffa             | 11.4873   | 20.6423   | 0          | 1         | 1         |
| Ctnnbip1_j4      | 0.131221  | 1.0246    | 0          | 1         | 1         |
| Clstn1_j3        | 97.9959   | 82.3054   | 0          | 1         | 1         |
| Clstn1_j2        | 0.198833  | 0.209485  | 0          | 1         | 1         |
| XLOC_023268      | 0.211535  | 0.0580586 | -1.86531   | 0.206936  | 0.551484  |
| Gm5506_j5        | 3.64281   | 1.89582   | 0          | 1         | 1         |
| Gm5506_j7        | 31.1149   | 45.0143   | 0          | 1         | 1         |
| Dnajc11_j1       | 5.58932   | 6.01081   | 0.104887   | 0.693571  | 0.886804  |
| NoI9_j1          | 3.03801   | 3.15342   | 0.053789   | 0.744853  | 0.910906  |
| mKIAA0720_j3     | 0.0199367 | 0.161614  | 0          | 1         | 1         |
| Acot7_j6         | 0.639535  | 0.625     | -0.0331681 | 0.957291  | 0.987778  |
| Gpr153_j3        | 9.61256   | 13.2593   | 0          | 1         | 1         |
| Icmt             | 13.8946   | 11.4858   | 0          | 1         | 1         |
| Rpl22            | 32.5904   | 33.3979   | 0.0353123  | 0.706503  | 0.892937  |
| Rpl22_j1         | 1.68744   | 1.49517   | -0.174532  | 0.631136  | 0.8565    |
| Rpl22_j2         | 4.61878   | 4.99656   | 0.113423   | 0.629988  | 0.856283  |
| A430005L14Rik_j1 | 0.813166  | 0.397437  | -1.03283   | 0.126352  | 0.442698  |
| BC046331_j2      | 5.08807   | 5.18885   | 0          | 1         | 1         |
| Wdr8             | 8.29353   | 7.67869   | 0          | 1         | 1         |
| Megf6_j8         | 0.225454  | 0.336486  | 0.577712   | 1         | 1         |
| Ttc34_j1         | 0.0939041 | 0.0508315 | -0.885465  | 0.387493  | 1         |
| Ttc34            | 0.119834  | 0.227826  | 0.926891   | 0.0849444 | 0.355671  |
| Hes5_j1          | 0.4626    | 0.301777  | -0.616286  | 0.49531   | 0.78277   |
| Morn1_j4         | 0.0561534 | 0.0357521 | -0.651345  | 0.633822  | 1         |
| Morn1_j6         | 0.0978168 | 0.0362598 | -1.43171   | 0.224892  | 1         |
| 2610002J02Rik_j2 | 15.2844   | 17.8973   | 0          | 1         | 1         |
| 2010015L04Rik_j6 | 0.0429366 | 0.0849804 | 0.984922   | 0.443334  | 1         |
| Gnb1             | 35.082    | 32.8349   | 0          | 1         | 1         |
| Gnb1_j7          | 0.346588  | 0.57863   | 0          | 1         | 1         |
| Nadk_j1          | 0.766274  | 1.2911    | 0          | 1         | 1         |
| Slc35e2_j1       | 0.452863  | 0.607348  | 0          | 1         | 1         |
| Cdk11b_j7        | 0.78465   | 1.211     | 0          | 1         | 1         |
| Cdk11b_j10       | 2.05094   | 1.33165   | 0          | 1         | 1         |
| Ssu72_j1         | 7.58061   | 7.52088   | 0          | 1         | 1         |
| Ssu72            | 26.5762   | 26.5422   | 0          | 1         | 1         |
| Gm5151_j1        | 1.90311   | 2.22358   | 0          | 1         | 1         |
| Gm5151_j2        | 0.422133  | 0.217236  | 0          | 1         | 1         |

|                  |             |             |               |           |           |
|------------------|-------------|-------------|---------------|-----------|-----------|
| Gm5151           | 0.842198    | 0.738294    | 0             | 1         | 1         |
| 2610204G22Rik_j3 | 0           | 0.122863    | 1.79769e+308  | 0.0502989 | 1         |
| Mrpl20           | 49.4231     | 53.6514     | 0.11843       | 0.262149  | 0.611283  |
| Ccnl2_j1         | 2.63779     | 3.91769     | 0.570676      | 0.000487  | 0.0079703 |
| Aurkaip1_j1      | 11.9872     | 12.4714     | 0             | 1         | 1         |
| Mxra8_j3         | 0.000257889 | 0.343259    | 0             | 1         | 1         |
| Mxra8_j2         | 0.410001    | 0.000200506 | 0             | 1         | 1         |
| Dvl1_j5          | 0.532017    | 0.767228    | 0.528183      | 0.203565  | 0.547765  |
| Dvl1_j3          | 1.9074      | 1.5598      | -0.290246     | 0.320662  | 0.663889  |
| Dvl1_j4          | 1.00457     | 1.53088     | 0.607791      | 0.0507263 | 0.260798  |
| Acap3_j2         | 4.88755     | 5.17713     | 0.0830409     | 0.444174  | 0.752041  |
| Acap3_j5         | 2.30177     | 2.45543     | 0.0932362     | 0.685159  | 0.882509  |
| Ube2j2_j3        | 0.670396    | 0.828341    | 0.305209      | 0.520482  | 0.797892  |
| Ube2j2_j5        | 0.0537708   | 0.131313    | 1.28811       | 0.241736  | 1         |
| Sdf4_j1          | 0.178608    | 0.430506    | 0             | 1         | 1         |
| Sdf4_j6          | 0.100835    | 0.097606    | 0             | 1         | 1         |
| 9430015G10Rik_j5 | 0.590938    | 0.458656    | -0.365596     | 0.357951  | 0.693676  |
| 9430015G10Rik_j9 | 0.19774     | 0           | -1.79769e+308 | 0.0001578 | 0.0031456 |
| AK172315         | 0.0923366   | 0.099731    | 0.111139      | 0.897871  | 1         |
| AW011738         | 0.680137    | 0.669466    | -0.0228159    | 0.927145  | 0.977499  |
| 2310042D19Rik    | 0.443667    | 0.355088    | -0.321301     | 0.263266  | 0.612179  |
| Tmem68_j2        | 0.070789    | 0.0279441   | 0             | 1         | 1         |
| Nsmaf_j4         | 12.1312     | 15.0264     | 0             | 1         | 1         |
| Tox_j1           | 0.310291    | 0.612918    | 0.982075      | 0.0054886 | 0.0544821 |
| Car8_j1          | 1.44286     | 1.67526     | 0             | 1         | 1         |
| Asph_j1          | 2.00951     | 2.66215     | 0.405748      | 0.0679236 | 0.312003  |
| 2310030N02Rik_j4 | 0.903858    | 0.581844    | -0.635464     | 0.280458  | 0.629124  |
| Ints8_j2         | 0.0708363   | 0.0854197   | 0.27008       | 0.757568  | 1         |
| Ints8_j4         | 0.741096    | 0.215541    | -1.7817       | 0.0010873 | 0.0152508 |
| Pdp1_j2          | 2.26989     | 3.27269     | 0             | 1         | 1         |
| Tmem67_j2        | 0.72149     | 0.877072    | 0.281715      | 0.543354  | 0.8108    |
| Fam92a_j4        | 4.66571     | 1.84136     | 0             | 1         | 1         |
| Fam92a_j2        | 10.1305     | 10.6658     | 0             | 1         | 1         |
| Fam92a_j3        | 1.33197     | 0.266068    | 0             | 1         | 1         |
| Slc26a7_j2       | 0.104283    | 4.15E-05    | -11.2952      | 0.946411  | 1         |
| Otud6b_j6        | 0.258709    | 1.16012     | 0             | 1         | 1         |
| Necab1_j1        | 0.631697    | 0.717477    | 0             | 1         | 1         |
| Wwp1             | 0.449638    | 0.109488    | -2.03799      | 2.02E-07  | 9.97E-06  |
| Nkain3_j1        | 0.389741    | 0.171749    | -1.18221      | 0.292818  | 0.639822  |
| Nkain3           | 0.22782     | 0.681426    | 1.58067       | 0.0547665 | 0.273004  |
| Klhl32_j3        | 0.0908202   | 0.273661    | 1.59131       | 0.0004206 | 0.007053  |
| XLOC_023380      | 0.118035    | 0.125446    | 0.0878531     | 0.927281  | 1         |
| XLOC_023380      | 0.0233131   | 0.0671715   | 1.52671       | 0.680192  | 1         |
| XLOC_023381      | 0           | 0.0614496   | 1.79769e+308  | 0.190453  | 1         |
| Ankrd6_j2        | 0.314084    | 0.0361589   | 0             | 1         | 1         |
| 4933421O10Rik_j1 | 2.10612     | 2.19157     | 0             | 1         | 1         |
| Slc35a1_j1       | 3.10476     | 3.77211     | 0.28089       | 0.223939  | 0.571105  |

|                  |           |                        |            |           |           |
|------------------|-----------|------------------------|------------|-----------|-----------|
| 1700003M02Rik_j1 | 0.168913  | 0.000563274            | -8.22823   | 0.907535  | 0.970775  |
| 1700003M02Rik_j1 | 0         | 0.15292 1.79769e+308   |            | 0.0122419 | 1         |
| 1810030N24Rik_j1 | 7.4223    | 4.79071                | -0.631628  | 0.0231226 | 0.155713  |
| 3110043O21Rik    | 32.438    | 30.0348                | -0.111048  | 0.22062   | 0.567463  |
| Lingo2           | 0.651789  | 0.434126               | 0          | 1         | 1         |
| Ddx58_j1         | 1.76241   | 2.19544                | 0.316964   | 0.119726  | 0.430688  |
| Aptx_j3          | 0.0328904 | 0.10449                | 0          | 1         | 1         |
| Aptx_j4          | 1.22326   | 1.1795                 | 0          | 1         | 1         |
| Bag1_j1          | 77.8694   | 89.5872                | 0          | 1         | 1         |
| Nol6_j4          | 9.48897   | 9.39406                | 0          | 1         | 1         |
| Smrp1_j6         | 0         | 0.050141 1.79769e+308  |            | 0.175188  | 1         |
| Smrp1_j7         | 0.079906  | 0.114732               | 0.521894   | 0.724864  | 1         |
| Smrp1_j8         | 0.0942461 | 0 -1.79769e+308        |            | 0.0556031 | 1         |
| 2310028H24Rik_j1 | 13.3055   | 15.2499                | 0          | 1         | 1         |
| Cntfr_j5         | 6.41673   | 6.42622                | 0          | 1         | 1         |
| Cntfr_j2         | 1.28997   | 0.820989               | 0          | 1         | 1         |
| Ccl27a_j1        | 7.9493    | 8.56851                | 0.108217   | 0.595013  | 0.838618  |
| Ccl27a           | 1.84297   | 1.5658                 | -0.235133  | 0.339292  | 0.679562  |
| Gm1987_j5        | 0.193628  | 0.784898               | 2.01922    | 0.047636  | 0.250675  |
| Gm1987_j6        | 0.0227792 | 0.522047               | 4.51839    | 0.0836515 | 0.352594  |
| Gm1987_j3        | 0.301934  | 0.429795               | 0.509414   | 0.504758  | 0.787836  |
| Vcp_j11          | 6.25923   | 5.89574                | -0.0863111 | 1         | 1         |
| Vcp_j14          | 19.9351   | 20.569                 | 0.045162   | 0.793277  | 0.931082  |
| Pigo_j10         | 0.644099  | 1.31561                | 1.03038    | 1.11E-05  | 0.0003396 |
| Pigo_j9          | 1.61678   | 0.523151               | -1.62782   | 4.28E-09  | 3.22E-07  |
| B230312A22Rik_j5 | 8.65595   | 14.1811                | 0          | 1         | 1         |
| Tpm2_j2          | 1.11211   | 0.592587               | -0.908207  | 0.101557  | 0.394853  |
| Tpm2             | 0.343089  | 1.26081                | 1.8777     | 0.0001768 | 0.0034664 |
| Tpm2             | 0.28156   | 1.06139                | 1.91444    | 0.0001209 | 0.0025167 |
| Hint2            | 7.80397   | 7.49416                | -0.0584415 | 0.773174  | 0.923046  |
| 4930412F15Rik    | 0.25668   | 0.260879               | 0.023409   | 0.962581  | 0.989507  |
| Tomm5_j2         | 38.2436   | 33.2604                | -0.201416  | 0.170127  | 0.507178  |
| Trim14_j8        | 0.942185  | 0.182913               | -2.36485   | 0.0590789 | 0.28563   |
| XLOC_023464      | 0         | 0.0795762 1.79769e+308 |            | 0.0434284 | 1         |
| Alg2_j1          | 1.73475   | 1.91536                | 0.142888   | 0.545925  | 0.812733  |
| Tex10_j2         | 0.581482  | 0.540359               | 0          | 1         | 1         |
| Mrpl50           | 17.2336   | 17.8834                | 0.0533961  | 0.61052   | 0.846532  |
| Grin3a_j2        | 1.79425   | 1.70846                | 0          | 1         | 1         |
| Al427809         | 0.438105  | 0.258682               | -0.760094  | 0.196305  | 0.539086  |
| Ikbkap_j6        | 0         | 0.747296 1.79769e+308  |            | 1.76E-06  | 6.76E-05  |
| Ikbkap_j1        | 10.8143   | 10.6654                | -0.0199968 | 0.843793  | 0.950589  |
| Ctnnal1_j6       | 3.08483   | 2.78128                | 0          | 1         | 1         |
| D730040F13Rik_j4 | 0.997108  | 0.737393               | 0          | 1         | 1         |
| D730040F13Rik_j7 | 0.149977  | 0.0624839              | 0          | 1         | 1         |
| AK133010         | 9.78E-06  | 0.163322               | 14.0272    | 0.989101  | 0.996607  |
| Al314180_j2      | 18.1085   | 20.1652                | 0          | 1         | 1         |
| Susd1_j10        | 0.156045  | 0.00958241             | -4.02543   | 0.0941637 | 0.378121  |

|                  |           |                       |            |           |          |
|------------------|-----------|-----------------------|------------|-----------|----------|
| Rod1_j7          | 0.459556  | 0.498215              | 0.116528   | 0.784891  | 0.927751 |
| 1110054O05Rik_j1 | 0.231239  | 0.0574046             | -2.01014   | 0.0478874 | 0.251563 |
| Mup20_j1         | 0.0819495 | 0.0792344             | -0.0486084 | 0.958108  | 1        |
| Zfp37_j1         | 0.478585  | 0.472374              | -0.0188452 | 0.959712  | 0.98856  |
| Cdc26_j3         | 0.114092  | 0.085987              | -0.408011  | 0.636841  | 1        |
| Wdr31_j3         | 0.0722745 | 0 -1.79769e+308       |            | 0.0121751 | 1        |
| Whrn_j3          | 1.95518   | 1.15447               | 0          | 1         | 1        |
| Astn2            | 1.896     | 0.754647              | 0          | 1         | 1        |
| Dbc1_j1          | 0         | 0.105633              | 0          | 1         | 1        |
| Cdk5rap2_j6      | 2.63834   | 2.99753               | 0.18414    | 0.412645  | 0.731647 |
| Tle1_j1          | 7.55935   | 6.04418               | 0          | 1         | 1        |
| Tle1_j10         | 0.228493  | 0.317033              | 0          | 1         | 1        |
| Ptprd_j1         | 0         | 0.127158 1.79769e+308 |            | 0.0005618 | 1        |
| Ptprd            | 0.638934  | 0.296399              | -1.10813   | 0.0633762 | 0.298613 |
| Mpdz_j10         | 7.35035   | 8.06672               | 0.13417    | 0.367215  | 0.70072  |
| Mpdz_j9          | 2.66246   | 2.72898               | 0.0356001  | 0.828613  | 0.944635 |
| Ttc39b           | 1.0828    | 1.16855               | 0          | 1         | 1        |
| XLOC_023541      | 0.075028  | 0.06947               | -0.11104   | 0.910594  | 1        |
| XLOC_023541      | 0.0590417 | 0.0413434             | -0.514077  | 0.755397  | 1        |
| XLOC_023541      | 0.0650171 | 0.000448753           | -7.17875   | 0.823035  | 1        |
| XLOC_023541      | 0.0909959 | 0.0831418             | -0.130229  | 0.910974  | 1        |
| XLOC_023541      | 0.220022  | 0.166317              | -0.403711  | 0.677916  | 0.878919 |
| Gm12414_j3       | 0.0579138 | 0.103953              | 0.843946   | 0.373868  | 1        |
| Plin2_j3         | 8.84015   | 17.991                | 0          | 1         | 1        |
| Slc24a2          | 1.62742   | 0.325718              | 0          | 1         | 1        |
| Mllt3_j1         | 1.38885   | 2.98149               | 0          | 1         | 1        |
| XLOC_023557      | 0.159249  | 0.201012              | 0.335991   | 0.745347  | 0.91128  |
| Elavl2_j1        | 5.11326   | 5.58805               | 0          | 1         | 1        |
| AK080222_j1      | 0.264562  | 0.216489              | -0.289315  | 0.616272  | 0.848764 |
| 5830433M19Rik_j1 | 0.163603  | 0.318912              | 0.962957   | 0.0815348 | 0.347847 |
| 4930579C15Rik_j2 | 0.213878  | 0.172284              | -0.311998  | 0.63299   | 0.857376 |
| AK079280         | 0.302472  | 0.262885              | -0.202366  | 0.710872  | 0.894923 |
| Cyp2j12-ps       | 2.3738    | 1.96069               | -0.275841  | 0.199975  | 0.543147 |
| Cyp2j12-ps_j1    | 0.292042  | 0.431269              | 0.562411   | 0.534388  | 0.80555  |
| Cyp2j12-ps_j2    | 0.718366  | 0.551933              | -0.380225  | 0.55276   | 0.816696 |
| E130114P18Rik_j1 | 0.153161  | 0.215043              | 0.489576   | 0.538933  | 0.80821  |
| E130114P18Rik_j2 | 1.30455   | 1.19497               | -0.126579  | 0.713388  | 0.896209 |
| Tm2d1            | 2.26734   | 1.80014               | -0.332894  | 0.362481  | 0.696764 |
| Kank4_j1         | 7.76192   | 5.09325               | 0          | 1         | 1        |
| Kank4_j2         | 3.8422    | 2.34076               | 0          | 1         | 1        |
| Dock7_j1         | 0.152526  | 0.223359              | 0.550309   | 0.512027  | 0.79188  |
| Jak1_j3          | 0.870907  | 1.08481               | 0          | 1         | 1        |
| Jak1_j4          | 36.2618   | 37.9924               | 0          | 1         | 1        |
| Wdr78_j4         | 0.123528  | 0.0601705             | -1.03771   | 0.300356  | 1        |
| Prkaa2_j1        | 0.607217  | 0.579338              | 0          | 1         | 1        |
| Prkaa2_j2        | 0.69386   | 0.229417              | 0          | 1         | 1        |
| BC055111_j2      | 0.164666  | 0.0997554             | -0.72308   | 0.345695  | 0.684965 |

|                  |           |                 |            |           |           |
|------------------|-----------|-----------------|------------|-----------|-----------|
| Ttc4_j1          | 2.81786   | 2.89058         | 0          | 1         | 1         |
| Scp2_j1          | 8.96483   | 11.552          | 0.365799   | 0.0035089 | 0.0390115 |
| Fam159a_j3       | 0.112137  | 0.127212        | 0.181974   | 0.906535  | 1         |
| Gpx7_j1          | 2.24385   | 2.57622         | 0.199284   | 0.45603   | 0.759645  |
| Prpf38a          | 5.90698   | 6.24322         | 0          | 1         | 1         |
| Prpf38a_j1       | 0.166539  | 0.0515159       | 0          | 1         | 1         |
| Zfyve9_j3        | 1.76202   | 1.80998         | 0          | 1         | 1         |
| Zfyve9_j4        | 6.77911   | 3.80893         | 0          | 1         | 1         |
| Btf3l4_j2        | 7.5929    | 6.7565          | -0.168375  | 0.165378  | 0.501911  |
| Osbpl9_j2        | 1.1015    | 2.50625         | 0          | 1         | 1         |
| Osbpl9_j3        | 12.1251   | 9.43345         | 0          | 1         | 1         |
| AK148461_j4      | 0.0862823 | 0.582984        | 0          | 1         | 1         |
| Cyp4b1_j1        | 0.459723  | 3.14936         | 2.77622    | 4.97E-13  | 7.45E-11  |
| 4930544O15Rik_j2 | 0.26888   | 0.276336        | 0.0394624  | 0.941601  | 0.982193  |
| Mast2            | 2.4867    | 2.96414         | 0.253386   | 0.110989  | 0.414596  |
| Nasp             | 1.97451   | 2.06826         | 0.0669255  | 0.735675  | 0.906939  |
| Akr1a4           | 331.96    | 373.933         | 0.171773   | 0.0497345 | 0.257546  |
| Toe1_j2          | 1.0727    | 1.01737         | 0          | 1         | 1         |
| Urod_j3          | 26.3562   | 25.4189         | -0.0522395 | 0.676328  | 0.878168  |
| Urod             | 8.10163   | 7.1229          | -0.185747  | 0.0873835 | 0.361684  |
| Btbd19_j1        | 0.0975423 | 0.095406        | -0.0319471 | 0.975949  | 1         |
| Rps8_j1          | 2.51698   | 2.59665         | 0.0449566  | 0.938526  | 0.981236  |
| Rps8_j7          | 0.298725  | 0 -1.79769e+308 |            | 5.71E-05  | 0.0013345 |
| Gm1661_j2        | 0.109713  | 0.100471        | -0.126957  | 0.922892  | 1         |
| Rnf220_j4        | 6.72313   | 9.12313         | 0          | 1         | 1         |
| Dmap1            | 2.92142   | 3.15239         | 0          | 1         | 1         |
| Ccdc24_j1        | 0.128391  | 0.194403        | 0.598508   | 0.252324  | 0.600308  |
| Atp6v0b_j1       | 49.0821   | 60.9427         | 0          | 1         | 1         |
| Ipo13_j7         | 3.37685   | 3.41584         | 0          | 1         | 1         |
| Ipo13_j8         | 7.91207   | 8.53997         | 0          | 1         | 1         |
| Ipo13_j9         | 0.410899  | 1.09746         | 0          | 1         | 1         |
| St3gal3_j1       | 1.60697   | 1.37868         | 0          | 1         | 1         |
| St3gal3_j4       | 1.82161   | 1.47861         | 0          | 1         | 1         |
| Kdm4a_j1         | 2.42688   | 3.49986         | 0          | 1         | 1         |
| Ptprf_j1         | 5.38578   | 6.41812         | 0          | 1         | 1         |
| Szt2_j7          | 0.088218  | 0.000344903     | 0          | 1         | 1         |
| Tie1_j2          | 1.24835   | 1.02611         | -0.282839  | 0.559604  | 0.82076   |
| Wdr65_j1         | 0.515046  | 0.218782        | -1.23521   | 0.124607  | 0.439858  |
| Ybx1_j3          | 3.13997   | 3.76418         | 0.261582   | 0.203097  | 0.546932  |
| Ccdc30_j1        | 0.587676  | 0.662597        | 0.17311    | 0.672737  | 0.876472  |
| Rimkla_j2        | 8.13547   | 6.74384         | 0          | 1         | 1         |
| Rimkla_j1        | 0.86238   | 1.43511         | 0          | 1         | 1         |
| AA415398_j2      | 0.063487  | 0.0638155       | 0          | 1         | 1         |
| AA415398_j5      | 0.0476549 | 0               | 0          | 1         | 1         |
| Ctps_j1          | 1.89304   | 2.00102         | 0          | 1         | 1         |
| Nfyc_j2          | 3.66598   | 3.52758         | -0.0555211 | 0.753054  | 0.914675  |
| Nfyc_j8          | 0.699479  | 0.254985        | -1.45587   | 0.255207  | 0.6036    |

|                  |           |                       |           |           |           |
|------------------|-----------|-----------------------|-----------|-----------|-----------|
| Nfyc_j10         | 0.131618  | 0.0773431             | -0.767008 | 0.642508  | 1         |
| Rlf_j4           | 0.111469  | 0.481769              | 0         | 1         | 1         |
| Gm12873_j1       | 0.0693185 | 0 -1.79769e+308       |           | 0.120644  | 1         |
| Ppie_j1          | 3.01535   | 4.36621               | 0.534057  | 0.0208651 | 0.145186  |
| Macf1_j13        | 2.42303   | 2.09149               | -0.212281 | 0.170735  | 0.507662  |
| Macf1_j14        | 5.12795   | 5.30794               | 0.0497697 | 0.658182  | 0.869976  |
| Macf1_j15        | 0         | 0.132275 1.79769e+308 |           | 0.0843398 | 1         |
| Macf1_j17        | 0.0600836 | 0.0623945             | 0.0544477 | 0.966414  | 1         |
| Ndufs5_j2        | 13.9054   | 15.4541               | 0.152345  | 0.446126  | 0.75332   |
| Akirin1_j1       | 23.7225   | 26.5106               | 0         | 1         | 1         |
| 1110065P20Rik_j1 | 0.0569067 | 0.267349              | 2.23205   | 9.62E-05  | 0.0020842 |
| Zc3h12a          | 0.116826  | 0.112544              | -0.053875 | 0.939771  | 1         |
| 1700029G01Rik_j3 | 0.0463737 | 0.0604575             | 0.382615  | 0.775623  | 1         |
| Thrap3_j9        | 16.2032   | 16.4312               | 0.0201564 | 0.868612  | 0.958331  |
| Thrap3_j2        | 0.196718  | 0.0840767             | -1.22635  | 0.225043  | 0.572307  |
| Thrap3_j3        | 0.244323  | 0 -1.79769e+308       |           | 0.0002302 | 0.0043058 |
| Mtap7d1_j5       | 30.2299   | 63.0825               | 0         | 1         | 1         |
| Mtap7d1_j6       | 1.30913   | 2.75365               | 0         | 1         | 1         |
| Mtap7d1_j7       | 39.7942   | 56.4775               | 0         | 1         | 1         |
| Adprhl2_j3       | 1.25435   | 2.1211                | 0         | 1         | 1         |
| Adprhl2          | 5.14334   | 6.21776               | 0         | 1         | 1         |
| Eif2c1_j2        | 1.03387   | 1.16253               | 0         | 1         | 1         |
| Eif2c1_j1        | 0         | 0.0915093             | 0         | 1         | 1         |
| Eif2c4_j5        | 0.187576  | 0.164901              | -0.185878 | 0.849767  | 0.952228  |
| Eif2c4_j8        | 0.386401  | 0.538185              | 0.478003  | 0.294289  | 0.641033  |
| CK137956_j1      | 1.34879   | 1.48562               | 0         | 1         | 1         |
| Zfp362_j1        | 2.23306   | 2.63731               | 0         | 1         | 1         |
| Adc_j1           | 2.84178   | 3.46751               | 0         | 1         | 1         |
| AK019743         | 0.0934474 | 0.22785               | 1.28586   | 0.20197   | 0.545319  |
| C77080           | 4.50392   | 9.23037               | 0         | 1         | 1         |
| Zbtb8a           | 0.764819  | 0.812347              | 0.0869781 | 0.680928  | 0.880014  |
| Hdac1_j6         | 0.021204  | 0.0566235             | 1.41707   | 0.608313  | 1         |
| Hdac1_j13        | 0.275799  | 0.136953              | -1.00994  | 0.482094  | 0.775415  |
| Hdac1_j15        | 0.592702  | 0.467315              | -0.34291  | 0.575199  | 0.828142  |
| Tmem39b          | 0.496694  | 0.287296              | -0.789818 | 0.20906   | 0.553253  |
| Gm12963_j3       | 0.172544  | 0.0870579             | 0         | 1         | 1         |
| Gm12963_j2       | 0.273094  | 0.303941              | 0         | 1         | 1         |
| Gm12963_j1       | 0.0436104 | 0.140336              | 0         | 1         | 1         |
| Gm12963          | 0.790983  | 0.684249              | 0         | 1         | 1         |
| Hcrtr1           | 0.321006  | 0.417633              | 0.379637  | 0.431274  | 0.743572  |
| Serinc2          | 4.40651   | 4.31493               | 0         | 1         | 1         |
| Zcchc17_j2       | 5.01234   | 4.33736               | 0         | 1         | 1         |
| XLOC_023758      | 0.12624   | 0.115678              | -0.126051 | 0.870078  | 1         |
| Epb4.1_j2        | 1.56445   | 1.86953               | 0.257026  | 0.249052  | 0.596568  |
| Epb4.1_j16       | 6.78044   | 5.43893               | -0.318057 | 0.0018546 | 0.0235473 |
| Ythdf2_j1        | 2.23487   | 2.66704               | 0.255046  | 0.140291  | 0.465858  |
| Gmeb1_j3         | 0.259054  | 0.345268              | 0         | 1         | 1         |

|                  |           |                 |            |           |          |
|------------------|-----------|-----------------|------------|-----------|----------|
| Gmeb1_j4         | 0.36614   | 0.285394        | 0          | 1         | 1        |
| Trnau1ap_j3      | 0.237728  | 0.367966        | 0.630264   | 0.483304  | 0.775954 |
| Rcc1_j3          | 0.427224  | 1.73032         | 0          | 1         | 1        |
| Rcc1             | 0.664309  | 0.545402        | 0          | 1         | 1        |
| Phactr4_j2       | 0.952224  | 1.15898         | 0          | 1         | 1        |
| Phactr4_j1       | 0.0256158 | 0.200072        | 0          | 1         | 1        |
| Atpif1_j1        | 0         | 0.340915        | 0          | 1         | 1        |
| Ppp1r8_j1        | 3.96661   | 4.26752         | 0          | 1         | 1        |
| Stx12_j2         | 30.9829   | 33.3364         | 0          | 1         | 1        |
| Gpr3_j2          | 0.0794118 | 0 -1.79769e+308 | 0.0211617  |           | 1        |
| Wdte1_j1         | 0.506433  | 0.353165        | 0          | 1         | 1        |
| Trnp1_j2         | 0.142987  | 0.114876        | -0.315811  | 0.832284  | 0.945814 |
| Nudc_j3          | 12.2513   | 17.3042         | 0          | 1         | 1        |
| Zdhhc18_j8       | 2.98439   | 2.29866         | 0          | 1         | 1        |
| Zdhhc18_j6       | 37.9057   | 43.4658         | 0          | 1         | 1        |
| Zdhhc18_j2       | 0.0297124 | 0.342738        | 0          | 1         | 1        |
| Pigv             | 0.136113  | 0.174329        | 0          | 1         | 1        |
| Pigv_j2          | 0.610612  | 0.720064        | 0          | 1         | 1        |
| Hmgn2_j1         | 7.92275   | 8.47177         | 0.0966624  | 0.5528    | 0.816729 |
| Ccdc21_j1        | 1.52449   | 1.38989         | -0.133363  | 0.669922  | 0.875139 |
| Pdik1l           | 0.283369  | 0.277001        | -0.0327895 | 0.934876  | 0.980088 |
| Fam54b_j1        | 4.81767   | 3.90251         | 0          | 1         | 1        |
| Fam54b_j2        | 0.174981  | 0.233774        | 0          | 1         | 1        |
| Sepn1_j5         | 3.54251   | 5.62103         | 0          | 1         | 1        |
| Sepn1            | 5.09778   | 6.30399         | 0          | 1         | 1        |
| Tmem57_j4        | 1.22024   | 4.99165         | 0          | 1         | 1        |
| Tmem50a_j1       | 0.823743  | 0.750434        | 0          | 1         | 1        |
| Srrm1_j2         | 4.91066   | 5.40192         | 0          | 1         | 1        |
| Srrm1_j4         | 0.891884  | 0.940066        | 0          | 1         | 1        |
| A330049M08Rik_j3 | 0.199933  | 0.233173        | 0          | 1         | 1        |
| Rcan3            | 8.99104   | 10.0818         | 0          | 1         | 1        |
| Nipal3_j2        | 24.2769   | 8.70286         | 0          | 1         | 1        |
| Nipal3_j1        | 56.2944   | 55.5941         | 0          | 1         | 1        |
| Nipal3           | 22.3372   | 8.48295         | 0          | 1         | 1        |
| Rpl11_j5         | 1.53205   | 1.57116         | 0.0363653  | 0.877168  | 0.96086  |
| Kdm1a            | 2.03153   | 2.31276         | 0          | 1         | 1        |
| Ephb2_j1         | 0.0488323 | 0.117991        | 1.27277    | 0.102437  | 1        |
| C1qb_j1          | 5.55109   | 16.0747         | 0          | 1         | 1        |
| Epha8_j5         | 0.259696  | 0.283818        | 0.128138   | 0.836831  | 0.947789 |
| Zbtb40_j6        | 1.01313   | 0.942037        | -0.10497   | 0.672379  | 0.87624  |
| Cdc42_j4         | 1.08345   | 1.9525          | 0          | 1         | 1        |
| Cdc42            | 15.1966   | 21.3008         | 0          | 1         | 1        |
| Pink1            | 0.83339   | 0.556388        | 0          | 1         | 1        |
| Cda_j1           | 8.28547   | 8.735           | 0.0762246  | 0.717168  | 0.897916 |
| Pla2g5_j1        | 0.124376  | 0.110581        | -0.169608  | 0.849907  | 1        |
| Otud3_j1         | 0.203092  | 0.381062        | 0.907892   | 0.0212816 | 0.146992 |
| 2310028O11Rik_j2 | 3.20813   | 4.71453         | 0          | 1         | 1        |

|                  |           |                 |           |           |          |
|------------------|-----------|-----------------|-----------|-----------|----------|
| Pqlc2            | 1.21514   | 0.834795        | 0         | 1         | 1        |
| Pqlc2_j4         | 0.390479  | 0.496743        | 0         | 1         | 1        |
| Arhgef10l_j1     | 10.4997   | 12.1556         | 0         | 1         | 1        |
| Arhgef10l_j2     | 5.25564   | 4.29023         | 0         | 1         | 1        |
| AK040418_j1      | 0.0244521 | 0.0844455       | 1.78806   | 0.204822  | 1        |
| Crocc_j1         | 0.477286  | 0.053962        | -3.14484  | 0.0195988 | 0.139035 |
| Crocc_j2         | 0.0541676 | 0.0918631       | 0.762055  | 0.482794  | 1        |
| Crocc_j3         | 0.154279  | 0 -1.79769e+308 |           | 2.89E-07  | 1.38E-05 |
| Crocc_j15        | 0.112838  | 0.0712888       | -0.662509 | 0.601164  | 1        |
| Crocc_j17        | 0.0454288 | 0.058298        | 0.35984   | 0.798375  | 1        |
| D4Ertd22e_j2     | 1.08471   | 0.953404        | 0         | 1         | 1        |
| Spen_j8          | 0.466185  | 0.327931        | 0         | 1         | 1        |
| Spen             | 0.28162   | 0.224116        | 0         | 1         | 1        |
| Fhad1_j1         | 0.0590622 | 0.0431423       | -0.453131 | 0.683432  | 1        |
| 9030409G11Rik_j6 | 1.21404   | 1.2465          | 0         | 1         | 1        |
| Prdm2_j3         | 0.301457  | 0               | 0         | 1         | 1        |
| Prdm2_j8         | 5.89819   | 5.97256         | 0         | 1         | 1        |
| Vps13d_j10       | 0         | 1.33893         | 0         | 1         | 1        |
| Vps13d_j11       | 7.32348   | 7.65357         | 0         | 1         | 1        |
| Vps13d_j2        | 5.05514   | 3.19758         | 0         | 1         | 1        |
| Vps13d_j14       | 0.061683  | 0.0559144       | -0.141653 | 1         | 1        |
| Gm13240          | 0.725893  | 0.736072        | 0.0200902 | 0.962986  | 0.989715 |
| Gm13136          | 3.35892   | 3.4737          | 0         | 1         | 1        |
| Gm13157_j8       | 0.0290483 | 0.0720815       | 0         | 1         | 1        |
| Zfp933_j1        | 0.736532  | 0.329811        | 0         | 1         | 1        |
| Miip_j5          | 0.331339  | 0.969599        | 0         | 1         | 1        |
| Clcn6            | 22.3508   | 23.4296         | 0.0680065 | 0.438619  | 0.748213 |
| Agtrap_j1        | 1.29091   | 1.47441         | 0.191751  | 0.405081  | 0.726949 |
| Tardbp_j4        | 7.23737   | 7.75038         | 0         | 1         | 1        |
| Tardbp_j5        | 17.158    | 21.632          | 0         | 1         | 1        |
| Apitd1_j2        | 1.20105   | 1.03574         | -0.213635 | 0.653745  | 0.867564 |
| Apitd1_j1        | 0.354044  | 0.156405        | -1.17865  | 0.237377  | 0.584096 |
| Kif1b_j6         | 2.16051   | 2.06249         | 0         | 1         | 1        |
| Ube4b_j1         | 2.52402   | 3.64929         | 0         | 1         | 1        |
| Ube4b_j2         | 18.5018   | 17.4892         | 0         | 1         | 1        |
| Nmnat1           | 1.02525   | 1.29135         | 0         | 1         | 1        |
| Tmem201          | 0.201138  | 9.59E-05        | 0         | 1         | 1        |
| Spsb1            | 1.1157    | 0.434545        | 0         | 1         | 1        |
| H6pd_j1          | 0.483494  | 0.432337        | -0.161341 | 0.630652  | 0.856399 |
| Slc45a1_j1       | 3.41109   | 4.54153         | 0.412946  | 0.0418263 | 0.230822 |
| Park7            | 128.945   | 139.863         | 0.117256  | 0.186056  | 0.526451 |
| Camta1_j6        | 6.48321   | 7.99575         | 0         | 1         | 1        |
| Camta1_j7        | 5.57813   | 6.3312          | 0         | 1         | 1        |
| Espn_j7          | 0.076011  | 0.0363219       | 0         | 1         | 1        |
| Gm13077          | 6.26587   | 4.49145         | -0.480334 | 0.0714649 | 0.321458 |
| Dffb_j5          | 4.69E-05  | 0.0651209       | 10.4385   | 0.955483  | 1        |
| Tprgl_j1         | 49.8596   | 54.4815         | 0         | 1         | 1        |



|                  |           |           |               |           |           |
|------------------|-----------|-----------|---------------|-----------|-----------|
| Prdm16_j6        | 0.12731   | 0         | -1.79769e+308 | 5.49E-06  | 1         |
| Prdm16_j5        | 0.76608   | 0.596552  | -0.360848     | 0.162935  | 0.498187  |
| Prdm16_j4        | 0.891258  | 0.758155  | -0.233352     | 0.340011  | 0.680118  |
| Tnfrsf14_j5      | 0.115263  | 0.0852331 | -0.435445     | 0.577903  | 1         |
| Plch2_j2         | 2.21001   | 1.63574   | -0.434108     | 0.074019  | 0.327958  |
| Rer1_j1          | 15.4478   | 20.1944   | 0             | 1         | 1         |
| Ski_j4           | 0.526066  | 0.573284  | 0             | 1         | 1         |
| Ski_j5           | 7.26377   | 8.24349   | 0             | 1         | 1         |
| Prkcz_j2         | 0.474108  | 0.405595  | -0.225174     | 0.591555  | 0.837134  |
| Prkcz_j9         | 0.985846  | 0.272986  | -1.85254      | 0.0623716 | 0.295598  |
| Prkcz_j12        | 7.66993   | 6.88683   | -0.155373     | 0.330296  | 0.672202  |
| Mmp23_j2         | 0.175496  | 0.244792  | 0.480117      | 0.688331  | 0.884145  |
| Atad3a_j10       | 0.0610687 | 0.0540139 | 0             | 1         | 1         |
| Tmem88b          | 1.19565   | 4.52132   | 0             | 1         | 1         |
| Agrn_j1          | 1.00098   | 1.1481    | 0             | 1         | 1         |
| Agrn_j3          | 1.23423   | 0         | 0             | 1         | 1         |
| Plekhn1_j11      | 1.66368   | 1.95427   | 0             | 1         | 1         |
| Plekhn1_j12      | 0.278355  | 0.651427  | 0             | 1         | 1         |
| AI838599_j2      | 0.308986  | 0.248559  | -0.313954     | 0.566054  | 0.824301  |
| Fam110b_j2       | 5.17411   | 3.60546   | 0             | 1         | 1         |
| Fam110b_j4       | 3.54164   | 4.45991   | 0             | 1         | 1         |
| Sdcbp            | 26.0774   | 31.1157   | 0             | 1         | 1         |
| Rab2a_j2         | 116.206   | 110.067   | 0             | 1         | 1         |
| Chd7_j1          | 0.205145  | 0.0683154 | -1.58637      | 0.0010036 | 0.0143618 |
| 4930412C18Rik_j1 | 0.101557  | 0.0616702 | -0.719649     | 0.417114  | 1         |
| 4930412C18Rik    | 0.0964826 | 0.0379713 | -1.34536      | 0.219426  | 1         |
| XLOC_022700      | 0.110403  | 0.115542  | 0.0656294     | 0.925073  | 1         |
| Trp53inp1_j1     | 0.274474  | 0.100742  | 0             | 1         | 1         |
| Ccne2_j1         | 0.40477   | 0.394937  | -0.0354772    | 0.879759  | 0.961537  |
| C430048L16Rik_j1 | 1.89525   | 1.89526   | 0             | 1         | 1         |
| XLOC_022713      | 0.165836  | 0.0268442 | -2.62708      | 0.23465   | 0.582023  |
| XLOC_022713      | 0.075155  | 0.0370058 | -1.02212      | 0.583966  | 1         |
| AK080160_j7      | 0.358556  | 0.21045   | -0.76872      | 0.331116  | 0.67285   |
| Gm11872_j1       | 0.114765  | 0.0524217 | -1.13045      | 0.302172  | 1         |
| Ccnc_j3          | 0.456734  | 0.715426  | 0             | 1         | 1         |
| Ccnc             | 5.23741   | 4.45752   | 0             | 1         | 1         |
| Coq3_j1          | 1.48486   | 1.07132   | 0             | 1         | 1         |
| Coq3_j2          | 0.571075  | 0.477879  | 0             | 1         | 1         |
| 6230409E13Rik_j4 | 8.95887   | 6.1646    | 0             | 1         | 1         |
| XLOC_022734      | 0.139411  | 0.0616261 | 0             | 1         | 1         |
| Gpr63_j1         | 0.377249  | 0.448022  | 0.248051      | 0.317061  | 0.660456  |
| Epha7            | 0.163378  | 0.142486  | -0.197389     | 0.67008   | 0.875195  |
| Epha7_j3         | 0.149683  | 0.124357  | -0.267419     | 0.5967    | 0.839661  |
| Bach2_j1         | 0.896515  | 0.620955  | -0.529839     | 0.0112141 | 0.093347  |
| Mdn1_j1          | 0.170439  | 0.0774884 | 0             | 1         | 1         |
| AK045932_j1      | 0.120355  | 0         | -1.79769e+308 | 0.0125004 | 1         |
| Dnaja1_j4        | 0.550394  | 0.651388  | 0             | 1         | 1         |

|                  |           |           |               |           |           |
|------------------|-----------|-----------|---------------|-----------|-----------|
| Ube2r2_j1        | 0.108673  | 0         | -1.79769e+308 | 0.130475  | 1         |
| Nudt2_j2         | 0.931444  | 1.93363   | 0             | 1         | 1         |
| Dnaic1_j1        | 0.173644  | 0.131249  | -0.403822     | 0.60478   | 0.844071  |
| Dnaic1_j2        | 1.15852   | 1.73511   | 0.582746      | 0.0118324 | 0.0971661 |
| Il11ra1_j2       | 1.88864   | 2.13533   | 0.177106      | 0.205641  | 0.550043  |
| N28178_j2        | 4.89424   | 4.42688   | 0             | 1         | 1         |
| N28178_j7        | 61.3949   | 42.2309   | 0             | 1         | 1         |
| N28178_j6        | 29.7732   | 17.6034   | 0             | 1         | 1         |
| Unc13b_j9        | 0.536495  | 0.411406  | -0.383003     | 0.255799  | 0.604561  |
| Unc13b_j16       | 5.13261   | 5.48156   | 0.0948945     | 0.55345   | 0.817245  |
| Atp8b5_j1        | 0.208819  | 3.53E-05  | -12.5322      | 0.978492  | 0.993756  |
| Atp8b5_j10       | 0.161255  | 0.172583  | 0.0979469     | 0.876825  | 0.960844  |
| Rusc2_j3         | 9.12254   | 9.49236   | 0             | 1         | 1         |
| Rusc2_j4         | 7.29531   | 10.8127   | 0             | 1         | 1         |
| Car9_j2          | 0.249322  | 0.139716  | -0.835517     | 0.219986  | 0.566699  |
| Npr2             | 15.0156   | 14.7353   | 0             | 1         | 1         |
| Tmem8b_j1        | 9.07595   | 8.13183   | -0.158468     | 0.0977315 | 0.386304  |
| 5430416O09Rik_j1 | 0.0803347 | 0.190823  | 1.24814       | 0.228013  | 0.575066  |
| Clta_j1          | 53.1759   | 51.7221   | 0             | 1         | 1         |
| Clta             | 82.1712   | 88.3358   | 0             | 1         | 1         |
| Melk_j1          | 0.195133  | 0.0844456 | -1.20836      | 0.260794  | 0.609626  |
| XLOC_022806      | 0.139115  | 0.0346999 | -2.00327      | 0.0825155 | 0.350028  |
| Zcchc7           | 1.78578   | 2.03965   | 0.19177       | 0.348476  | 0.686685  |
| Zcchc7_j2        | 4.27019   | 5.24044   | 0.295388      | 0.13012   | 0.449148  |
| Rg9mtd3_j1       | 3.47133   | 4.00601   | 0.206678      | 0.36352   | 0.697532  |
| Tmod1            | 67.7702   | 68.9005   | 0.0238644     | 0.780645  | 0.925867  |
| Anp32b_j5        | 9.38997   | 11.3606   | 0.274845      | 0.152071  | 0.483508  |
| Galnt12_j3       | 0.140341  | 0         | -1.79769e+308 | 0.010923  | 0.0913602 |
| Col15a1_j2       | 0.114498  | 0.103493  | -0.145789     | 0.863418  | 1         |
| Tgfbr1_j2        | 0.42427   | 0         | -1.79769e+308 | 5.43E-14  | 9.32E-12  |
| Gm12430          | 6.32016   | 6.79179   | 0.103831      | 0.483022  | 0.775876  |
| Rnf20_j1         | 3.49993   | 3.7522    | 0             | 1         | 1         |
| Slc44a1_j1       | 1.42038   | 1.78959   | 0             | 1         | 1         |
| Slc44a1_j2       | 0.47228   | 0.482487  | 0             | 1         | 1         |
| Slc44a1_j4       | 0.229834  | 0         | 0             | 1         | 1         |
| Fktn_j1          | 0.547002  | 0.279084  | 0             | 1         | 1         |
| Fktn_j4          | 1.27377   | 1.14783   | 0             | 1         | 1         |
| Gm12530_j3       | 0.0914338 | 0.0393293 | -1.21712      | 0.498831  | 1         |
| XLOC_022861      | 0.0947934 | 0.097791  | 0.0449161     | 0.950506  | 1         |
| Musk_j2          | 0.24656   | 0.204268  | -0.271477     | 0.758939  | 0.917041  |
| Zkscan16_j2      | 0.253445  | 0         | -1.79769e+308 | 2.68E-15  | 5.52E-13  |
| Zkscan16_j3      | 0.313171  | 0.435816  | 0.476768      | 0.0494982 | 0.256787  |
| Dnajc25_j1       | 0.567157  | 0.89897   | 0.664524      | 0.0406155 | 0.226125  |
| Gng10_j1         | 3.71547   | 3.20194   | -0.214599     | 0.454946  | 0.758773  |
| 4933430I17Rik_j1 | 0.125179  | 0.179817  | 0.522538      | 0.437432  | 0.747672  |
| Gm11210_j1       | 0.108103  | 0.0885121 | -0.288458     | 0.790457  | 1         |
| Zfp618_j1        | 0.0826911 | 0         | -1.79769e+308 | 7.43E-06  | 1         |

|                  |             |            |               |           |           |
|------------------|-------------|------------|---------------|-----------|-----------|
| Zfp618_j2        | 0.141547    | 0          | -1.79769e+308 | 2.23E-09  | 1.76E-07  |
| Zfp618_j7        | 0.406921    | 0.00100751 | -8.65782      | 0.0734045 | 0.326393  |
| Zfp618_j6        | 0.195803    | 0.297738   | 0.604638      | 0.0677727 | 0.311637  |
| Col27a1_j6       | 0.302789    | 0.352601   | 0.219724      | 0.493448  | 0.781898  |
| Col27a1_j17      | 3.39489     | 4.04702    | 0.253498      | 0.115391  | 0.422424  |
| Atp6v1g1_j1      | 5.71127     | 4.54114    | -0.330756     | 0.0266445 | 0.171763  |
| 6330416G13Rik_j1 | 0.414074    | 0.427162   | 0             | 1         | 1         |
| Pappa            | 0.488413    | 0.346014   | 0             | 1         | 1         |
| Tlr4_j2          | 0.0574886   | 0          | -1.79769e+308 | 0.0003049 | 1         |
| C630043F03Rik    | 0.21363     | 0.323615   | 0             | 1         | 1         |
| AK131821_j1      | 0.207498    | 0.154598   | -0.424574     | 0.442615  | 0.750693  |
| Kdm4c_j4         | 0.588008    | 0.808539   | 0.45948       | 0.401294  | 0.724568  |
| XLOC_022903      | 0.0497564   | 0.047515   | -0.0664995    | 0.964519  | 1         |
| Tyrp1            | 0.812107    | 1.03837    | 0             | 1         | 1         |
| Gm11266_j1       | 0.177815    | 0.109915   | 0             | 1         | 1         |
| 4930473A06Rik_j2 | 0.221319    | 0.19547    | -0.179182     | 0.635004  | 0.858387  |
| 4930473A06Rik_j6 | 0.0934073   | 0          | -1.79769e+308 | 0.0001276 | 1         |
| 4930473A06Rik_j7 | 0.296478    | 0.40279    | 0.442103      | 0.29317   | 0.640163  |
| XLOC_022910      | 0.184362    | 0.13298    | -0.471328     | 0.499321  | 0.784504  |
| Cntln_j7         | 0.524019    | 0.380428   | -0.461996     | 0.236766  | 0.583799  |
| Sh3gl2_j1        | 0.994791    | 2.21387    | 0             | 1         | 1         |
| Acer2            | 0.000317965 | 0.7403     | 11.185        | 0.468691  | 0.767193  |
| BC057079_j1      | 0.185514    | 0.151467   | -0.292528     | 0.560995  | 0.82146   |
| XLOC_022930      | 0.198201    | 0.0365087  | -2.44066      | 0.0720544 | 0.322792  |
| Hook1_j5         | 0.25915     | 0.141624   | -0.871722     | 0.16858   | 0.505242  |
| Inadl_j1         | 0.217633    | 0          | -1.79769e+308 | 0.0065028 | 0.0622175 |
| Efcab7_j4        | 0.185605    | 0.0314268  | -2.56217      | 0.241809  | 0.58895   |
| AK002929_j1      | 0.0891139   | 0          | -1.79769e+308 | 0.02779   | 1         |
| Lepr_j1          | 0.0397784   | 0.0957002  | 1.26654       | 0.128791  | 1         |
| Pde4b_j2         | 0.571318    | 0          | 0             | 1         | 1         |
| Sgip1_j1         | 0.739704    | 0.00437615 | 0             | 1         | 1         |
| Dab1_j1          | 0.156249    | 0          | -1.79769e+308 | 0.0134808 | 0.106641  |
| Dab1_j3          | 0.128916    | 0.198454   | 0.622372      | 0.504731  | 0.787836  |
| Dab1_j8          | 0.186912    | 0          | -1.79769e+308 | 0.0132274 | 0.105302  |
| 1700024P16Rik_j1 | 0.178278    | 0.0949025  | -0.909608     | 0.198743  | 0.541907  |
| 1700024P16Rik_j8 | 0.0903928   | 0.138059   | 0.611         | 0.557472  | 1         |
| Usp24_j6         | 1.93629     | 2.61893    | 0.435681      | 0.059926  | 0.288181  |
| Ssbp3            | 1.59184     | 1.32072    | 0             | 1         | 1         |
| Ssbp3_j2         | 3.61003     | 3.35053    | 0             | 1         | 1         |
| Ssbp3_j3         | 1.26616     | 0          | 0             | 1         | 1         |
| mFLJ00377_j2     | 0.521682    | 0.126001   | -2.04974      | 0.0035131 | 0.0390487 |
| Cyb5rl           | 0.353205    | 0.138434   | -1.35131      | 0.0612527 | 0.292139  |
| mFLJ00377_j4     | 0.176385    | 0          | -1.79769e+308 | 0.000623  | 0.00978   |
| Tmem59_j2        | 8.70885     | 13.4506    | 0.627118      | 0.0039893 | 0.0427804 |
| Glis1_j2         | 0.135994    | 0.0288731  | -2.23574      | 0.105576  | 1         |
| Glis1_j3         | 0.107771    | 0.0394102  | -1.45133      | 0.385229  | 1         |
| Lrp8_j4          | 0.0580974   | 0.238048   | 2.03471       | 0.0202232 | 0.141955  |

|                  |           |                 |            |           |           |
|------------------|-----------|-----------------|------------|-----------|-----------|
| Lrp8_j6          | 0.0833683 | 0.102848        | 0.302938   | 0.744545  | 1         |
| Lrp8_j7          | 0.188324  | 0.044919        | -2.06782   | 0.0922028 | 0.373682  |
| 0610037L13Rik_j6 | 11.4195   | 9.8186          | 0          | 1         | 1         |
| Zcchc11_j3       | 0.129592  | 0 -1.79769e+308 |            | 7.04E-06  | 1         |
| Zcchc11_j1       | 0.166267  | 0.11148         | -0.57671   | 0.307626  | 0.652717  |
| Zcchc11_j2       | 0.145964  | 0.0706738       | -1.04636   | 0.124429  | 0.43969   |
| Orc1_j1          | 0.458466  | 0.220867        | -1.05364   | 0.201725  | 0.545317  |
| Rab3b            | 2.72992   | 2.48405         | -0.13616   | 0.415258  | 0.733182  |
| Nrd1_j1          | 1.18354   | 1.07894         | 0          | 1         | 1         |
| Calr4_j1         | 0.124947  | 0 -1.79769e+308 |            | 0.019203  | 1         |
| Calr4_j2         | 0.242473  | 0.0796147       | -1.60672   | 0.101715  | 0.395032  |
| Faf1_j3          | 0.7166    | 0 -1.79769e+308 |            | 1.42E-08  | 9.67E-07  |
| Faf1_j5          | 7.0309    | 6.96302         | -0.0139964 | 0.902121  | 0.968734  |
| Agbl4_j1         | 0.393239  | 0.145298        | -1.4364    | 0.0124753 | 0.101066  |
| Spata6_j1        | 3.79577   | 3.51505         | 0          | 1         | 1         |
| Spata6_j2        | 1.51274   | 0.977094        | 0          | 1         | 1         |
| 9130206I24Rik_j5 | 0.0779    | 0.0200654       | -1.95691   | 0.440202  | 1         |
| Gm12833          | 0.746575  | 0.980528        | 0.393272   | 0.545429  | 0.81235   |
| Mobkl2c_j1       | 0.180588  | 0.144208        | -0.324554  | 0.642901  | 0.862213  |
| Mknk1_j3         | 0.366801  | 0.230385        | -0.67095   | 0.304136  | 0.649897  |
| Mknk1_j1         | 0.526064  | 0.129408        | -2.02331   | 0.0198055 | 0.13987   |
| Mknk1_j2         | 0.558387  | 0.776161        | 0.475091   | 0.28167   | 0.630218  |
| Mknk1_j4         | 0.414099  | 0 -1.79769e+308 |            | 0.0004574 | 0.0075614 |
| Mknk1_j5         | 0.575036  | 0.207213        | -1.47254   | 0.119884  | 0.431035  |
| XLOC_023009      | 0.202177  | 0.00829601      | -4.60706   | 0.166143  | 0.502787  |
| Lrrc41_j3        | 1.92749   | 2.58096         | 0          | 1         | 1         |
| AK010894_j1      | 0.270744  | 0.233132        | -0.215786  | 0.468541  | 0.767111  |
| Pik3r3_j2        | 0.329459  | 0.0345815       | 0          | 1         | 1         |
| Gpbp1l1_j3       | 4.27711   | 3.93297         | -0.121017  | 0.597003  | 0.83999   |
| Ccdc17_j2        | 0.058035  | 0.0306191       | -0.922493  | 0.542211  | 1         |
| Ccdc17_j9        | 0.0501452 | 0.0641715       | 0.355821   | 0.766161  | 1         |
| Ccdc17_j13       | 0.0498114 | 0 -1.79769e+308 |            | 0.187685  | 1         |
| Ccdc163_j5       | 0.0671518 | 0.155055        | 1.20728    | 0.251241  | 1         |
| Ccdc163_j7       | 0.0844285 | 0.191728        | 1.18326    | 0.25707   | 0.605894  |
| Ccdc163_j6       | 0.125535  | 0.0914571       | -0.456919  | 0.667436  | 1         |
| Ccdc163_j15      | 0.514185  | 0.301458        | -0.77033   | 0.326941  | 0.66996   |
| Ccdc163_j16      | 0.977364  | 1.04194         | 0.0923084  | 0.795216  | 0.931693  |
| AK078255         | 0.168054  | 0.100122        | -0.747164  | 0.28958   | 0.637033  |
| Ptch2_j1         | 0.15031   | 0.0737249       | -1.02772   | 0.304777  | 0.65013   |
| Ptch2_j2         | 0.17259   | 0.0234241       | -2.88128   | 0.123067  | 0.436713  |
| Eri3_j3          | 6.31942   | 1.83735         | 0          | 1         | 1         |
| Slc6a9_j2        | 0.0725074 | 0.0255038       | -1.50742   | 0.248156  | 1         |
| Med8             | 5.93719   | 7.66748         | 0          | 1         | 1         |
| Elovl1_j1        | 3.75977   | 5.06366         | 0          | 1         | 1         |
| Cldn19           | 0.657972  | 0.923666        | 0.489345   | 0.0790085 | 0.34104   |
| Foxj3_j1         | 0.558227  | 0.203347        | 0          | 1         | 1         |
| Col9a2_j1        | 0.150642  | 0.221382        | 0.555416   | 0.410834  | 0.730497  |

|                  |           |                 |             |           |           |
|------------------|-----------|-----------------|-------------|-----------|-----------|
| Trit1_j8         | 0.152826  | 0.0446202       | -1.77612    | 0.229685  | 0.576806  |
| Trit1_j9         | 0.886327  | 0.696443        | -0.347834   | 0.444181  | 0.752041  |
| XLOC_023052      | 0.131559  | 0.0898052       | -0.550839   | 0.556006  | 1         |
| Nt5c1a           | 0.245244  | 0.667935        | 1.44549     | 9.90E-13  | 1.41E-10  |
| Pabpc4_j3        | 0.536558  | 0.337105        | -0.670538   | 0.46204   | 0.763059  |
| Pabpc4_j10       | 0.892575  | 0.486322        | -0.876061   | 0.185463  | 0.525813  |
| Pabpc4_j12       | 0.148     | 0.184456        | 0.317685    | 0.655034  | 0.868237  |
| Rragd_j2         | 12.3317   | 11.7977         | -0.0638642  | 0.614352  | 0.847685  |
| Fhl3_j8          | 0.111435  | 0 -1.79769e+308 |             | 0.0159222 | 1         |
| Fhl3_j11         | 0.340342  | 0.185533        | -0.875312   | 0.188099  | 0.52933   |
| Sf3a3_j4         | 5.2483    | 6.91227         | 0           | 1         | 1         |
| Epha10           | 0.0715387 | 0.0335999       | -1.09027    | 0.551325  | 1         |
| AK134673_j9      | 0.712195  | 0.671102        | -0.0857414  | 0.803444  | 0.934749  |
| 9930104L06Rik_j4 | 0.881272  | 0.72898         | -0.273708   | 0.420461  | 0.736727  |
| Gnl2_j2          | 12.9849   | 10.8654         | 0           | 1         | 1         |
| 2310005N01Rik_j1 | 0.699561  | 0.769871        | 0.138166    | 0.834798  | 0.946943  |
| Csf3r_j6         | 0.0482365 | 0 -1.79769e+308 |             | 0.0470377 | 1         |
| Stk40_j5         | 2.27278   | 0.000658228     | 0           | 1         | 1         |
| Sfpq_j4          | 4.07955   | 3.81808         | 0           | 1         | 1         |
| Sfpq_j3          | 5.36847   | 4.76847         | 0           | 1         | 1         |
| AK019262         | 2.26883   | 1.23326         | 0           | 1         | 1         |
| Zmym6_j6         | 0.10444   | 0.541149        | 2.37335     | 5.53E-07  | 2.47E-05  |
| Zmym6_j10        | 0.193003  | 0.169644        | -0.186113   | 0.792984  | 0.931024  |
| XLOC_023094      | 0.580809  | 0.569666        | -0.0279466  | 0.912337  | 0.972389  |
| Csmd2_j3         | 0.21425   | 0.142985        | 0           | 1         | 1         |
| Csmd2_j2         | 0.285013  | 0.257449        | 0           | 1         | 1         |
| Ak2_j4           | 1.35179   | 1.84038         | 0.445133    | 0.116921  | 0.425121  |
| Rnf19b_j2        | 14.0078   | 19.7135         | 0           | 1         | 1         |
| Tmem54_j3        | 0.127474  | 0 -1.79769e+308 |             | 0.0016747 | 1         |
| Yars_j1          | 36.4482   | 42.9574         | 0           | 1         | 1         |
| AK077492         | 0.332287  | 0.409078        | 0.299943    | 0.701091  | 0.890145  |
| Zbtb8os_j4       | 0.64219   | 0.463166        | -0.47147    | 0.0960881 | 0.382758  |
| Ptp4a2_j1        | 0.206018  | 0 -1.79769e+308 |             | 0.0159495 | 0.120124  |
| Bai2             | 0.0642787 | 0.0576426       | -0.157205   | 0.867063  | 1         |
| Col16a1_j2       | 0.141663  | 0.087668        | 0           | 1         | 1         |
| Col16a1_j8       | 7.64484   | 7.44803         | 0           | 1         | 1         |
| Pef1_j4          | 0.0592408 | 0               | 0           | 1         | 1         |
| Fabp3_j2         | 6.79304   | 6.97867         | 0           | 1         | 1         |
| Pum1_j2          | 0.625168  | 0.622462        | -0.00625775 | 0.986975  | 0.996237  |
| Pum1_j1          | 0.717996  | 0.375943        | -0.933464   | 0.0210475 | 0.145976  |
| Pum1             | 1.67411   | 0.739337        | -1.17909    | 3.74E-05  | 0.0009326 |
| Sdc3_j4          | 0.0503875 | 0.0155454       | 0           | 1         | 1         |
| Laptm5_j1        | 1.74145   | 3.8124          | 0           | 1         | 1         |
| Laptm5_j3        | 1.09278   | 0.066898        | 0           | 1         | 1         |
| Ahdc1_j6         | 0.0683381 | 0               | 0           | 1         | 1         |
| Slc9a1_j2        | 1.27792   | 0.998891        | 0           | 1         | 1         |
| Gpatch3_j3       | 0.4459    | 0 -1.79769e+308 |             | 2.33E-12  | 3.13E-10  |

|                  |           |                 |            |           |           |
|------------------|-----------|-----------------|------------|-----------|-----------|
| Ubxn11_j3        | 0.19561   | 0.0569973       | -1.77901   | 0.246569  | 0.594158  |
| Ubxn11_j4        | 0.0951955 | 0.111608        | 0.22948    | 0.81352   | 1         |
| Ubxn11_j8        | 0.115484  | 0 -1.79769e+308 |            | 0.018314  | 1         |
| Ubxn11_j9        | 0.251231  | 0.263517        | 0.0688817  | 0.907736  | 0.970918  |
| Pafah2_j3        | 2.57952   | 2.5594          | 0          | 1         | 1         |
| Stmn1_j1         | 8.73358   | 13.0913         | 0.583967   | 7.39E-05  | 0.0016598 |
| Stmn1_j3         | 0.370993  | 0.0721837       | -2.36164   | 0.0533178 | 0.268707  |
| Stmn1_j4         | 0.387411  | 0 -1.79769e+308 |            | 5.51E-05  | 0.0012963 |
| Paqr7_j3         | 9.27997   | 11.3633         | 0.292185   | 0.0107589 | 0.0903139 |
| 2610002D18Rik_j1 | 0.087209  | 0 -1.79769e+308 |            | 0.0143092 | 1         |
| Rhd_j1           | 0.0583325 | 0.0477768       | -0.287991  | 0.812416  | 1         |
| Srsf10_j2        | 0.279676  | 0.19971         | -0.48585   | 0.209359  | 0.553704  |
| Gale_j2          | 5.26151   | 4.95639         | -0.086186  | 0.668601  | 0.874544  |
| Gale_j3          | 0.189741  | 0 -1.79769e+308 |            | 0.0520471 | 0.264795  |
| Asap3_j1         | 1.18901   | 1.19825         | 0.0111581  | 0.956881  | 0.987617  |
| Wnt4_j1          | 0.263155  | 0.402806        | 0.614173   | 0.338721  | 0.678961  |
| Hspg2_j9         | 0.314048  | 0.553902        | 0.818646   | 0.0013991 | 0.0186945 |
| Usp48_j2         | 2.97397   | 2.21739         | -0.423528  | 0.0078335 | 0.0714627 |
| Ece1_j2          | 1.5192    | 1.925           | 0          | 1         | 1         |
| Eif4g3_j17       | 9.56578   | 11.816          | 0.304786   | 0.0288969 | 0.181085  |
| Hp1bp3_j2        | 1.21206   | 2.17354         | 0.842585   | 0.0130426 | 0.1044    |
| XLOC_023195      | 2.50569   | 2.18874         | -0.195106  | 0.530367  | 0.803051  |
| Tmco4_j5         | 0.248622  | 0.198904        | -0.321883  | 0.607882  | 0.845362  |
| Ubr4_j6          | 0.0964276 | 0.126181        | 0.387974   | 0.29305   | 1         |
| Iffo2_j2         | 0.315562  | 0.296543        | 0          | 1         | 1         |
| Gm1667_j1        | 0.628671  | 0.421635        | -0.576312  | 0.201929  | 0.545319  |
| Atp13a2_j1       | 2.73361   | 2.22499         | 0          | 1         | 1         |
| Mfap2            | 0.188309  | 0.421362        | 1.16196    | 0.11487   | 0.421764  |
| XLOC_023214      | 0.107419  | 0.0602902       | -0.833256  | 0.344205  | 1         |
| Arhgef19_j5      | 1.62237   | 2.07289         | 0          | 1         | 1         |
| Epha2            | 0.307057  | 0.288002        | -0.0924256 | 0.799321  | 0.933125  |
| Epha2_j3         | 0.16193   | 0.0843262       | -0.941318  | 0.322209  | 0.665214  |
| Casp9_j2         | 7.61712   | 8.20779         | 0          | 1         | 1         |
| XLOC_023224      | 0.145412  | 0.0879029       | -0.726167  | 0.481471  | 0.775077  |
| XLOC_023226      | 0.126163  | 0.127737        | 0.0178845  | 0.982111  | 1         |
| Dffa_j1          | 27.7158   | 29.9739         | 0          | 1         | 1         |
| Ctnnbip1_j2      | 12.3415   | 11.7564         | 0          | 1         | 1         |
| XLOC_023268      | 0.153905  | 0.094808        | -0.698959  | 0.45077   | 0.756285  |
| XLOC_023268      | 0.327483  | 0.121086        | -1.43538   | 0.000258  | 0.0047423 |
| Gm5506_j6        | 27.3466   | 32.5501         | 0          | 1         | 1         |
| Rere_j12         | 4.93695   | 5.48499         | 0.151868   | 0.494437  | 0.782504  |
| mKIAA0720_j1     | 0.142299  | 0.323183        | 0          | 1         | 1         |
| Acot7_j5         | 12.7959   | 6.19209         | -1.04718   | 3.30E-06  | 0.0001183 |
| Gpr153_j4        | 6.83397   | 12.9388         | 0          | 1         | 1         |
| Chd5             | 8.20284   | 6.84979         | 0          | 1         | 1         |
| Chd5_j2          | 1.63595   | 1.13404         | 0          | 1         | 1         |
| Gm833_j1         | 0.15935   | 0.0719059       | -1.14802   | 0.361963  | 0.696333  |

|                  |           |            |               |           |           |
|------------------|-----------|------------|---------------|-----------|-----------|
| Morn1_j2         | 0.153545  | 0.123626   | -0.312674     | 0.728241  | 0.903676  |
| Morn1_j3         | 0.0604853 | 0          | -1.79769e+308 | 0.0037391 | 1         |
| 2010015L04Rik_j4 | 0.136599  | 0.121475   | -0.169297     | 0.801934  | 1         |
| Nadk             | 2.3547    | 4.99915    | 0             | 1         | 1         |
| Slc35e2          | 0.915273  | 0.550264   | 0             | 1         | 1         |
| Slc35e2          | 0.220404  | 0.0338586  | 0             | 1         | 1         |
| Slc35e2_j2       | 1.99531   | 2.00085    | 0             | 1         | 1         |
| Cdk11b_j6        | 0.570007  | 0.317651   | 0             | 1         | 1         |
| Cdk11b_j5        | 1.50247   | 1.32749    | 0             | 1         | 1         |
| 2610204G22Rik_j2 | 0.214295  | 0.0653861  | -1.71254      | 0.194181  | 0.536591  |
| Mrpl20_j1        | 0.140779  | 0          | -1.79769e+308 | 0.0500175 | 0.258408  |
| Dvl1_j6          | 2.3609    | 2.46347    | 0.0613553     | 0.803334  | 0.934749  |
| Dvl1_j7          | 2.48027   | 1.73809    | -0.512997     | 0.0580706 | 0.282831  |
| Ube2j2_j6        | 6.12062   | 7.52431    | 0.297883      | 0.0636432 | 0.299119  |
| Sdf4_j3          | 1.88136   | 0.338263   | 0             | 1         | 1         |
| Sdf4_j9          | 14.0845   | 15.7714    | 0             | 1         | 1         |
| Tnfrsf18_j1      | 0.0563003 | 0.0537623  | -0.0665483    | 0.911268  | 1         |
| 9430015G10Rik    | 0.150296  | 0.143557   | -0.066181     | 0.924019  | 0.976334  |
| Tmem68_j3        | 0.243717  | 0.202381   | 0             | 1         | 1         |
| Rps20_j2         | 37.5306   | 43.1829    | 0.202395      | 0.0678332 | 0.311775  |
| Plag1            | 0.258746  | 0.0130383  | -4.31072      | 0.000574  | 0.0091439 |
| Nsmaf            | 2.21391   | 1.85471    | 0             | 1         | 1         |
| Tox_j3           | 0.080855  | 0.110842   | 0.455091      | 0.617797  | 1         |
| Tox_j4           | 0.337944  | 0.0787992  | -2.10053      | 0.0136942 | 0.107839  |
| 2310030N02Rik_j3 | 0.68912   | 0.744181   | 0.110899      | 0.837399  | 0.948012  |
| AK080292_j2      | 0.0629005 | 0.00147941 | -5.40998      | 0.590637  | 1         |
| Ints8            | 0.613271  | 0.22758    | -1.43015      | 0.0022978 | 0.0278532 |
| Dpy19l4_j3       | 0.218756  | 0.331115   | 0             | 1         | 1         |
| Tmem67_j5        | 0.185668  | 0.237127   | 0.352932      | 0.602999  | 0.843234  |
| Fam92a_j1        | 0.22856   | 0.20711    | 0             | 1         | 1         |
| Fam92a_j9        | 1.73935   | 0.849547   | 0             | 1         | 1         |
| Otud6b_j3        | 0.23299   | 0.059718   | 0             | 1         | 1         |
| Otud6b_j1        | 0.532709  | 0.246628   | 0             | 1         | 1         |
| Rip2             | 1.34828   | 1.46551    | 0             | 1         | 1         |
| Cpne3_j2         | 18.5113   | 15.9715    | 0             | 1         | 1         |
| Wwp1_j2          | 0.278806  | 0          | -1.79769e+308 | 2.05E-17  | 5.41E-15  |
| Wwp1_j1          | 0.614059  | 1.03077    | 0.747267      | 5.49E-05  | 0.0012923 |
| Klhl32_j6        | 0.40495   | 0.316793   | -0.354203     | 0.602725  | 0.843123  |
| Klhl32_j8        | 0.507263  | 0.141988   | -1.83697      | 0.0829181 | 0.350922  |
| Ufl1_j3          | 2.57428   | 2.70586    | 0.0719216     | 0.742903  | 0.909993  |
| Manea_j3         | 0.557744  | 0.241576   | 0             | 1         | 1         |
| Manea_j4         | 1.30591   | 2.49522    | 0             | 1         | 1         |
| Ankrd6_j3        | 0.946054  | 1.58704    | 0             | 1         | 1         |
| Pm20d2_j1        | 0.538247  | 0.352202   | -0.611864     | 0.0701736 | 0.318092  |
| Orc3_j3          | 0         | 0.727902   | 1.79769e+308  | 4.18E-13  | 6.32E-11  |
| Orc3_j5          | 0.318293  | 0.435737   | 0.453101      | 0.141426  | 0.467795  |
| Orc3_j4          | 5.78561   | 5.10226    | -0.181331     | 0.0975183 | 0.385892  |

|                  |           |                        |           |           |           |
|------------------|-----------|------------------------|-----------|-----------|-----------|
| 1700003M02Rik_j2 | 0.632072  | 0.586403               | -0.108196 | 0.782428  | 0.926474  |
| Mobkl2b          | 0.224836  | 0.0550038              | -2.03127  | 0.213282  | 0.558495  |
| Lingo2_j1        | 0.478565  | 0.253333               | 0         | 1         | 1         |
| Ndufb6_j1        | 10.745    | 20.5051                | 0.932313  | 7.46E-05  | 0.0016733 |
| Nol6_j3          | 1.66351   | 1.63813                | 0         | 1         | 1         |
| Ubap2_j8         | 1.02988   | 0.968882               | 0         | 1         | 1         |
| Ubap2_j7         | 0.134194  | 0                      | 0         | 1         | 1         |
| Ubap2_j5         | 8.2574    | 9.10044                | 0         | 1         | 1         |
| 2310028H24Rik    | 0.306437  | 0.14961                | 0         | 1         | 1         |
| Gm1987_j4        | 0.649855  | 0 -1.79769e+308        |           | 5.30E-06  | 0.0001779 |
| Vcp_j3           | 0.503798  | 0 -1.79769e+308        |           | 2.29E-06  | 8.55E-05  |
| Fancg_j3         | 0.746341  | 0.565604               | -0.400043 | 0.278408  | 0.627354  |
| Pigo_j1          | 0.236178  | 0.540004               | 1.1931    | 0.0012544 | 0.0171367 |
| B230312A22Rik_j1 | 4.24819   | 5.95738                | 0         | 1         | 1         |
| Cd72             | 0.695659  | 0.979873               | 0.494214  | 0.140162  | 0.465682  |
| E130306D19Rik    | 0.132055  | 0.0512804              | -1.36466  | 0.134847  | 1         |
| Tpm2_j1          | 0.14071   | 0.185156               | 0.396021  | 0.749251  | 0.912938  |
| Tpm2_j6          | 0.998173  | 0 -1.79769e+308        |           | 1.25E-13  | 2.04E-11  |
| Tln1_j2          | 4.47545   | 3.93256                | 0         | 1         | 1         |
| Hint2_j1         | 17.5967   | 18.7432                | 0.0910626 | 0.589377  | 0.836031  |
| 4930412F15Rik_j1 | 0.409338  | 0.286658               | -0.513962 | 0.178259  | 0.517805  |
| Gne_j1           | 5.61516   | 5.10901                | 0         | 1         | 1         |
| Rnf38_j7         | 1.65717   | 2.57182                | 0         | 1         | 1         |
| Zbtb5_j1         | 0.796118  | 0.487442               | 0         | 1         | 1         |
| Fbxo10_j1        | 0.0956863 | 0.259276               | 1.4381    | 0.0804055 | 0.344932  |
| Mcart1_j3        | 17.7542   | 19.4543                | 0         | 1         | 1         |
| Mcart1_j1        | 0.23955   | 1.33646                | 0         | 1         | 1         |
| Igfbpl1          | 0.1697    | 0.253449               | 0.578708  | 0.325013  | 0.668195  |
| 5830415F09Rik_j1 | 0.0953506 | 0.0606609              | -0.652477 | 0.577395  | 1         |
| Coro2a_j1        | 0.484273  | 1.59321                | 0         | 1         | 1         |
| Tbc1d2_j5        | 0         | 0.0653468 1.79769e+308 |           | 0.0187547 | 1         |
| Tbc1d2_j6        | 0.135862  | 0.0381288              | -1.83319  | 0.10477   | 1         |
| Anks6_j4         | 0.241331  | 0.243101               | 0.010544  | 0.975472  | 0.992893  |
| Anks6_j3         | 0.0630652 | 0.012938               | -2.28523  | 0.088922  | 1         |
| XLOC_023464      | 0.219612  | 0.142896               | -0.619997 | 0.335792  | 0.676402  |
| XLOC_023465      | 0.216938  | 0.32008                | 0.561152  | 0.170548  | 0.507473  |
| Erp44_j1         | 3.24348   | 4.81726                | 0         | 1         | 1         |
| Tex10_j1         | 4.37726   | 4.25204                | 0         | 1         | 1         |
| Al427809_j4      | 0.187674  | 0.513783               | 1.45293   | 0.0176518 | 0.129113  |
| Ikbkap_j3        | 0.225082  | 0.296182               | 0.396032  | 0.647459  | 0.864124  |
| Ikbkap_j5        | 2.02487   | 2.29283                | 0.179299  | 0.449197  | 0.755415  |
| Ctnnal1_j1       | 1.17779   | 0.231478               | 0         | 1         | 1         |
| Ctnnal1_j3       | 0.157449  | 0.0651368              | 0         | 1         | 1         |
| Ctnnal1_j2       | 0.207669  | 0.207938               | 0         | 1         | 1         |
| D730040F13Rik_j1 | 0.265184  | 0.210845               | 0         | 1         | 1         |
| Epb4.1l4b_j1     | 0.147499  | 0 -1.79769e+308        |           | 9.94E-07  | 4.11E-05  |
| Txn1_j1          | 247.758   | 284.947                | 0.201763  | 0.0634086 | 0.298737  |



|             |           |                 |            |           |           |
|-------------|-----------|-----------------|------------|-----------|-----------|
| Txn1_j5     | 220.486   | 264.457         | 0.262345   | 0.0033438 | 0.0375262 |
| Al314180_j4 | 0.0546328 | 0.0468941       | 0          | 1         | 1         |
| Al314180_j6 | 0.665966  | 0               | 0          | 1         | 1         |
| Susd1_j3    | 0.194469  | 0.000927229     | -7.7124    | 0.435849  | 0.746551  |
| Susd1_j4    | 0.0703919 | 0 -1.79769e+308 |            | 0.0076698 | 1         |
| Rod1_j6     | 0.310876  | 0.589907        | 0.92415    | 0.0077073 | 0.0707682 |
| Fkbp15_j5   | 0.0849459 | 0.0133415       | 0          | 1         | 1         |
| Cdc26_j2    | 0.409217  | 0.400391        | -0.0314578 | 0.939618  | 0.981578  |
| Wdr31_j1    | 0.329866  | 0.228027        | -0.532674  | 0.43656   | 0.747163  |
| Tnc_j4      | 0.119715  | 0.11056         | -0.114765  | 0.896375  | 1         |
| Tnc_j5      | 0.115775  | 0.0435228       | -1.41148   | 0.282389  | 1         |
| Tnc_j1      | 0.19278   | 0.145166        | -0.409253  | 0.355701  | 0.691547  |
| Astn2       | 2.66332   | 1.88167         | 0          | 1         | 1         |
| Astn2       | 0.780102  | 1.15129         | 0          | 1         | 1         |
| Tle1_j4     | 5.18941   | 6.07885         | 0          | 1         | 1         |
| Tle1_j9     | 1.5478    | 1.3791          | 0          | 1         | 1         |
| Rasef_j3    | 0.704759  | 0.796501        | 0.176546   | 0.434892  | 0.745848  |
| Ptprd_j5    | 0.0721353 | 0 -1.79769e+308 |            | 0.0001361 | 1         |
| Ptprd_j4    | 0.0541852 | 0 -1.79769e+308 |            | 0.0008391 | 1         |
| Mpdz_j1     | 0.217294  | 0.0306537       | -2.82551   | 0.0497931 | 0.257695  |
| Mpdz_j2     | 0.728195  | 0.437121        | -0.736293  | 0.0069723 | 0.0656655 |
| Nfib_j4     | 0.267895  | 0.21262         | 0          | 1         | 1         |
| Frem1_j5    | 0.140308  | 0.00145258      | -6.59384   | 0.263468  | 0.612282  |
| Frem1_j6    | 0.0882001 | 0.0173714       | -2.34407   | 0.123843  | 1         |
| Frem1_j8    | 0.101836  | 0 -1.79769e+308 |            | 0.0035552 | 1         |
| Psip1_j2    | 8.06313   | 7.45559         | 0          | 1         | 1         |
| XLOC_023541 | 0.259014  | 0.0450921       | -2.52209   | 0.0028154 | 0.032751  |
| Bnc2_j1     | 0.0726601 | 0               | 0          | 1         | 1         |
| Slc24a2_j1  | 1.00866   | 1.4431          | 0          | 1         | 1         |
| Slc24a2_j2  | 0.259138  | 0.0483546       | 0          | 1         | 1         |
| Mllt3       | 0.341558  | 0               | 0          | 1         | 1         |
| XLOC_023557 | 0.187604  | 0.106897        | -0.811477  | 0.13553   | 0.458045  |
| Elavl2_j4   | 7.53697   | 5.31283         | 0          | 1         | 1         |
| Elavl2_j8   | 3.67883   | 2.39842         | 0          | 1         | 1         |
| XLOC_023564 | 0.136153  | 0.0979326       | -0.475367  | 0.624992  | 1         |
| Mysm1_j3    | 0.826756  | 0.813235        | 0          | 1         | 1         |
| AK079280_j1 | 0.0857076 | 0.0515446       | -0.733601  | 0.605386  | 1         |
| Tm2d1_j5    | 6.40739   | 6.78544         | 0.0827063  | 0.776636  | 0.924496  |
| Kank4_j3    | 12.6696   | 10.0049         | 0          | 1         | 1         |
| Dock7_j9    | 0.0894947 | 0.0304344       | -1.5561    | 0.101411  | 1         |
| Gm12688_j1  | 0.141527  | 0.064773        | 0          | 1         | 1         |
| Wdr78       | 0.593671  | 0.546789        | -0.118681  | 0.681212  | 0.880213  |
| Slc35d1_j1  | 0.701267  | 0.5262          | 0          | 1         | 1         |
| Pcsk9_j5    | 0.126034  | 0.0589426       | -1.09644   | 0.257802  | 1         |
| Ttc4_j6     | 4.1683    | 3.85363         | 0          | 1         | 1         |
| Gm1027_j3   | 0.112585  | 0 -1.79769e+308 |            | 0.0054401 | 1         |
| Gm1027_j4   | 0.116227  | 0.0278475       | -2.06132   | 0.120876  | 1         |

|                   |           |           |               |           |           |
|-------------------|-----------|-----------|---------------|-----------|-----------|
| Gm1027_j5         | 0.0260164 | 0.116207  | 2.15921       | 0.0454087 | 1         |
| Gm1027_j13        | 0.115291  | 0         | -1.79769e+308 | 0.0016507 | 1         |
| XLOC_023606       | 0.150832  | 0.138828  | -0.119636     | 0.861742  | 0.956305  |
| Lrrc42_j2         | 0.190201  | 0         | -1.79769e+308 | 0.003421  | 0.038217  |
| Scp2_j2           | 0.0642599 | 0.0788842 | 0.295819      | 0.811881  | 1         |
| Zyg11b_j2         | 0.116043  | 0         | 0             | 1         | 1         |
| Zfyve9_j5         | 0.0511625 | 0.0250824 | 0             | 1         | 1         |
| Elavl4            | 1.14397   | 0         | 0             | 1         | 1         |
| Elavl4_j4         | 9.31617   | 5.8281    | 0             | 1         | 1         |
| Cmpk1_j2          | 33.8552   | 41.3026   | 0             | 1         | 1         |
| Cmpk1_j1          | 0.107675  | 0.212268  | 0             | 1         | 1         |
| Mast2_j3          | 7.25878   | 7.03962   | -0.0442313    | 0.70827   | 0.893756  |
| Toe1_j1           | 0.923163  | 1.54922   | 0             | 1         | 1         |
| Btbd19_j7         | 0.0784559 | 5.24E-05  | -10.5494      | 0.966086  | 1         |
| Rps8_j6           | 0.17073   | 0.430696  | 1.33496       | 0.0334222 | 0.199636  |
| Rps8_j2           | 32.0179   | 37.4738   | 0.227003      | 0.067637  | 0.31119   |
| Dmap1_j1          | 0.137349  | 0.254636  | 0             | 1         | 1         |
| Dmap1_j2          | 0.0974732 | 0         | 0             | 1         | 1         |
| Ipo13_j2          | 1.31963   | 2.05149   | 0             | 1         | 1         |
| Ptprf_j4          | 16.7797   | 3.01434   | 0             | 1         | 1         |
| Szt2_j1           | 0.84425   | 1.18493   | 0             | 1         | 1         |
| Szt2_j9           | 0.688534  | 0.735737  | 0             | 1         | 1         |
| Cdc20_j2          | 0.24467   | 0         | -1.79769e+308 | 9.55E-06  | 0.0002982 |
| Tie1_j1           | 0.210481  | 0.0507741 | -2.05153      | 0.0328814 | 0.197493  |
| Ybx1_j4           | 0         | 0.490833  | 1.79769e+308  | 0.0110636 | 0.092346  |
| Ybx1_j6           | 0.590949  | 0.517276  | -0.192101     | 0.563664  | 0.822792  |
| Ybx1_j7           | 11.8818   | 16.1049   | 0.438739      | 0.022077  | 0.150882  |
| Ppcs_j1           | 2.75613   | 2.90347   | 0             | 1         | 1         |
| XLOC_023686       | 0.114243  | 0.125062  | 0.130537      | 0.870416  | 1         |
| Ctps              | 9.86391   | 9.1829    | 0             | 1         | 1         |
| Nfyc_j3           | 0.0918917 | 0.0595148 | -0.626685     | 0.40365   | 1         |
| Zfp69_j2          | 0.323092  | 0         | -1.79769e+308 | 0.007082  | 0.0664784 |
| Cap1_j1           | 5.14056   | 9.60359   | 0             | 1         | 1         |
| Macf1_j4          | 0.102869  | 0.055277  | -0.896056     | 0.181567  | 1         |
| Macf1_j6          | 0.908509  | 0.799317  | -0.184734     | 0.223254  | 0.570235  |
| Akirin1_j5        | 5.12789   | 5.47106   | 0             | 1         | 1         |
| Akirin1_j4        | 7.30061   | 9.38651   | 0             | 1         | 1         |
| Maneal_j2         | 1.12246   | 0.501207  | -1.16319      | 2.06E-09  | 1.64E-07  |
| XLOC_023717       | 0.0580958 | 0.0239577 | -1.27795      | 0.540831  | 1         |
| 1700029G01Rik_j12 | 0.0587716 | 0         | -1.79769e+308 | 0.0376898 | 1         |
| Thrap3_j1         | 0.927357  | 0.772782  | -0.263063     | 0.362365  | 0.696694  |
| Thrap3_j20        | 3.7727    | 3.16591   | -0.25298      | 0.329426  | 0.671701  |
| Mtap7d1_j8        | 0.127622  | 1.03761   | 0             | 1         | 1         |
| Mtap7d1_j9        | 0.710182  | 1.65588   | 0             | 1         | 1         |
| Adprh12_j2        | 1.14997   | 0.836839  | 0             | 1         | 1         |
| Eif2c3_j3         | 0.078263  | 0         | -1.79769e+308 | 2.44E-07  | 1         |
| Eif2c4_j3         | 0.419345  | 0.120634  | -1.7975       | 0.0003487 | 0.0060337 |

|             |           |                 |            |           |           |
|-------------|-----------|-----------------|------------|-----------|-----------|
| Eif2c4_j7   | 0.389225  | 0.128783        | -1.59566   | 0.0849826 | 0.355735  |
| Ncdn_j3     | 97.4904   | 107.766         | 0          | 1         | 1         |
| Ncdn_j2     | 26.4726   | 19.6324         | 0          | 1         | 1         |
| Zmym4_j3    | 3.88622   | 4.18898         | 0.10823    | 0.516435  | 0.795064  |
| Zmym4_j5    | 0.119032  | 0.175701        | 0.56177    | 0.211495  | 0.556206  |
| Zmym4_j6    | 0.109439  | 0.0127267       | -3.10421   | 0.0108174 | 1         |
| Adc_j4      | 2.17959   | 2.54841         | 0          | 1         | 1         |
| Adc_j7      | 0.105546  | 0               | 0          | 1         | 1         |
| Adc_j8      | 7.87638   | 18.2344         | 0          | 1         | 1         |
| Adc_j11     | 5.02456   | 10.3302         | 0          | 1         | 1         |
| AK019743_j1 | 0.160306  | 0 -1.79769e+308 |            | 0.0085764 | 0.0764582 |
| Hpca_j2     | 3.44502   | 1.16947         | -1.55865   | 9.71E-08  | 5.23E-06  |
| Hpca_j1     | 0.740521  | 0.760395        | 0.0382092  | 0.924472  | 0.976373  |
| C77080_j4   | 1.04228   | 0.0299353       | 0          | 1         | 1         |
| C77080_j1   | 0.692885  | 0.487217        | 0          | 1         | 1         |
| Hdac1_j5    | 0.160862  | 0.202081        | 0.329113   | 0.675724  | 0.877875  |
| Hdac1_j14   | 0.0633712 | 0.00185153      | -5.09704   | 0.334489  | 1         |
| Hdac1_j16   | 0.0606955 | 0.0641061       | 0.0788721  | 0.917039  | 1         |
| Eif3i_j4    | 4.63426   | 4.0103          | 0          | 1         | 1         |
| Txlna_j1    | 0.309652  | 0.256566        | 0          | 1         | 1         |
| Kpna6_j3    | 1.0154    | 0.000273826     | 0          | 1         | 1         |
| Serinc2_j3  | 7.88187   | 11.0924         | 0          | 1         | 1         |
| Ptpru_j1    | 0.0912829 | 0.0551195       | -0.727782  | 0.54674   | 1         |
| Ptpru_j2    | 0.132833  | 7.53E-05        | -10.7837   | 0.925308  | 1         |
| AK047558_j2 | 0.570203  | 0.451044        | -0.338208  | 0.241365  | 0.588455  |
| Epb4.1_j10  | 0.693512  | 0.615819        | -0.171414  | 0.38754   | 0.715266  |
| Gmeb1       | 1.48879   | 1.18731         | 0          | 1         | 1         |
| Trnau1ap_j2 | 0.968551  | 0.930454        | -0.057894  | 0.914421  | 0.973283  |
| Rcc1_j1     | 0.872861  | 2.24453         | 0          | 1         | 1         |
| Rcc1_j2     | 0.293686  | 0.150656        | 0          | 1         | 1         |
| Phactr4     | 0.315471  | 0.289382        | 0          | 1         | 1         |
| Atpif1_j2   | 20.6568   | 24.7662         | 0          | 1         | 1         |
| Atpif1_j3   | 26.3125   | 15.5219         | 0          | 1         | 1         |
| Atpif1_j4   | 8.13617   | 4.54394         | 0          | 1         | 1         |
| Wdtc1_j4    | 0.262004  | 0.0347926       | 0          | 1         | 1         |
| Nudc        | 21.6984   | 21.0565         | 0          | 1         | 1         |
| Zdhhc18_j7  | 5.76213   | 0.236657        | 0          | 1         | 1         |
| Pigv_j3     | 0.0830502 | 0.0761617       | 0          | 1         | 1         |
| Arid1a_j1   | 1.2439    | 0.734278        | 0          | 1         | 1         |
| Hmgn2_j3    | 0.701702  | 0.629881        | -0.15578   | 0.68681   | 0.883468  |
| Hmgn2_j4    | 0.64866   | 0.913771        | 0.49437    | 0.204652  | 0.548845  |
| Gm7534_j1   | 0.119572  | 0.0244869       | -2.2878    | 0.0849684 | 1         |
| Gm7534      | 0.252601  | 0.448616        | 0.82862    | 0.0522103 | 0.265265  |
| Grrp1_j3    | 0.154874  | 0.145609        | -0.0889944 | 0.92837   | 0.977919  |
| Sepn1_j4    | 1.43236   | 1.70997         | 0          | 1         | 1         |
| Man1c1_j4   | 0.678317  | 2.02921         | 0          | 1         | 1         |
| Tmem50a_j2  | 30.4359   | 36.0034         | 0          | 1         | 1         |

|                  |           |             |               |           |           |
|------------------|-----------|-------------|---------------|-----------|-----------|
| A330049M08Rik_j2 | 0.22683   | 0.168877    | 0             | 1         | 1         |
| Nipal3_j1        | 33.6099   | 44.4767     | 0             | 1         | 1         |
| Rpl11_j1         | 0.725043  | 0.461593    | -0.651446     | 0.0470331 | 0.248626  |
| Rpl11_j2         | 0.151313  | 0.151377    | 0.00061759    | 0.999408  | 0.999695  |
| Ephb2            | 0.916154  | 1.32727     | 0.534797      | 0.0054698 | 0.0543288 |
| Epha8_j11        | 0.224647  | 0.0479718   | -2.2274       | 0.113024  | 0.418515  |
| Zbtb40_j2        | 0.216462  | 0           | -1.79769e+308 | 6.10E-06  | 0.0002015 |
| Nbl1_j3          | 2.87684   | 2.33969     | 0             | 1         | 1         |
| Arhgef10l_j4     | 6.36451   | 6.45949     | 0             | 1         | 1         |
| Padi1_j1         | 0.0821618 | 0           | -1.79769e+308 | 0.0301686 | 1         |
| Crocc_j4         | 0.534836  | 0.777284    | 0.539345      | 0.122749  | 0.436124  |
| Crocc_j5         | 0.0503485 | 0.052198    | 0.0520474     | 0.946206  | 1         |
| Crocc_j6         | 0.241221  | 0.199275    | -0.275594     | 0.459293  | 0.761406  |
| Crocc_j7         | 0.330044  | 0           | -1.79769e+308 | 2.13E-16  | 5.27E-14  |
| Necap2_j3        | 1.24027   | 1.57943     | 0             | 1         | 1         |
| D4Ertd22e        | 1.52841   | 3.66626     | 0             | 1         | 1         |
| D4Ertd22e_j1     | 0.368013  | 0.000181968 | 0             | 1         | 1         |
| Plekhn2_j6       | 0.171617  | 0.401788    | 0             | 1         | 1         |
| Ddi2_j1          | 2.33668   | 2.49027     | 0             | 1         | 1         |
| Dnajc16_j1       | 0.918628  | 1.01919     | 0             | 1         | 1         |
| Fhad1_j4         | 0.131345  | 0.0730238   | -0.846926     | 0.504059  | 1         |
| Fhad1_j5         | 0.0556818 | 0           | -1.79769e+308 | 0.0086242 | 1         |
| Fhad1_j10        | 0.0248894 | 0.0890388   | 1.8389        | 0.182678  | 1         |
| Tmem51_j4        | 0.12781   | 0           | -1.79769e+308 | 0.0101469 | 1         |
| 9030409G11Rik_j2 | 2.52104   | 2.09496     | 0             | 1         | 1         |
| 9030409G11Rik_j3 | 0.747899  | 0.315352    | 0             | 1         | 1         |
| XLOC_023867      | 0.0745734 | 0.0642265   | -0.215491     | 0.865764  | 1         |
| XLOC_023867      | 0.165877  | 0.0428762   | -1.95187      | 0.208071  | 0.55225   |
| AK018156_j1      | 1.14754   | 0           | -1.79769e+308 | 8.80E-11  | 9.11E-09  |
| AK018156_j4      | 1.09301   | 1.57789     | 0.529681      | 0.120533  | 0.432452  |
| Vps13d_j1        | 0.853894  | 0.616601    | 0             | 1         | 1         |
| Tnfrsf8_j3       | 0.122818  | 0.125733    | 0.0338445     | 0.964564  | 1         |
| Gm13157_j1       | 0.15024   | 0.0125216   | 0             | 1         | 1         |
| Gm13157_j7       | 0.353765  | 0.314949    | 0             | 1         | 1         |
| Zfp933_j2        | 0.157846  | 0.298749    | 0             | 1         | 1         |
| Miip_j6          | 1.25853   | 0.862745    | 0             | 1         | 1         |
| Miip_j2          | 0.49461   | 0.552288    | 0             | 1         | 1         |
| 2610109H07Rik_j3 | 0.224817  | 0.918212    | 2.03007       | 2.00E-09  | 1.61E-07  |
| Fbxo44_j3        | 6.00864   | 6.63576     | 0             | 1         | 1         |
| Tardbp           | 0.467696  | 0.476076    | 0             | 1         | 1         |
| Pex14_j2         | 1.00887   | 0.287218    | -1.81253      | 0.0015157 | 0.0199027 |
| Pgd_j1           | 19.5549   | 19.4536     | 0             | 1         | 1         |
| Kif1b_j2         | 0.817243  | 0.487055    | 0             | 1         | 1         |
| Kif1b_j3         | 28.303    | 24.409      | 0             | 1         | 1         |
| Ube4b_j3         | 19.7934   | 21.818      | 0             | 1         | 1         |
| Nmnat1_j2        | 0.620901  | 0           | 0             | 1         | 1         |
| Nmnat1_j1        | 0.570224  | 0.728929    | 0             | 1         | 1         |

|                  |             |           |              |           |           |
|------------------|-------------|-----------|--------------|-----------|-----------|
| Tmem201_j3       | 0.132014    | 0.217989  | 0            | 1         | 1         |
| Spsb1_j2         | 1.00562     | 0.661922  | 0            | 1         | 1         |
| Per3_j5          | 0.107895    | 4.81E-05  | -11.1315     | 0.847457  | 1         |
| Per3_j4          | 0.0298955   | 0.134001  | 2.16425      | 0.0019057 | 1         |
| XLOC_023929      | 0.181842    | 0.0773005 | -1.23414     | 0.316749  | 0.660102  |
| Zbtb48_j4        | 0.157397    | 0.216193  | 0.457914     | 0.640738  | 0.861264  |
| Tas1r1_j1        | 0.120528    | 0.0462676 | -1.3813      | 0.208297  | 1         |
| Rnf207_j1        | 1.2656      | 1.13361   | 0            | 1         | 1         |
| Kcnab2_j7        | 0.168183    | 0         | 0            | 1         | 1         |
| Dffb_j2          | 0.241655    | 0.357769  | 0.566078     | 0.362695  | 0.697013  |
| Tnfrsf14_j2      | 0.0572845   | 0.0524198 | -0.128033    | 0.913257  | 1         |
| Tnfrsf14_j4      | 0.0328202   | 0.0678076 | 1.04686      | 0.413739  | 1         |
| Plch2_j1         | 0.25273     | 0.23935   | -0.0784719   | 0.849351  | 0.952228  |
| Ski_j3           | 0.462856    | 0         | 0            | 1         | 1         |
| Prkcz_j10        | 0.14327     | 0.0141542 | -3.33944     | 0.12538   | 0.441136  |
| Prkcz_j11        | 0.1054      | 0.036094  | -1.54604     | 0.247722  | 1         |
| Gabrd_j1         | 0.0840089   | 0.0468119 | -0.843669    | 0.606929  | 1         |
| Gabrd_j3         | 0.117663    | 0.0206241 | -2.51226     | 0.486807  | 1         |
| Mib2_j1          | 0.190236    | 0.0100019 | -4.24944     | 0.0039096 | 0.0422322 |
| Atad3a_j3        | 1.94243     | 0.821165  | 0            | 1         | 1         |
| Atad3a_j4        | 0.589387    | 0.644995  | 0            | 1         | 1         |
| Agrn_j10         | 0.117061    | 0.0882915 | 0            | 1         | 1         |
| Agrn_j11         | 0.0970223   | 0.14588   | 0            | 1         | 1         |
| Plekhn1_j13      | 1.4686      | 0.501257  | 0            | 1         | 1         |
| Tgs1_j2          | 0.0499328   | 0.210903  | 0            | 1         | 1         |
| Chchd7_j1        | 2.6805      | 1.49725   | 0            | 1         | 1         |
| Fam110b_j5       | 0.116001    | 0.100735  | 0            | 1         | 1         |
| Sdcbp_j2         | 0           | 0.136148  | 0            | 1         | 1         |
| Chd7_j2          | 0           | 0.0609304 | 1.79769e+308 | 0.065912  | 1         |
| Chd7_j8          | 0.479763    | 0.663653  | 0.468109     | 0.233811  | 0.581176  |
| 4930412C18Rik_j2 | 0.000458153 | 0.077054  | 7.3939       | 0.528546  | 1         |
| 4930412C18Rik_j3 | 0.0526441   | 0.250093  | 2.24812      | 0.0025434 | 0.0302506 |
| Fsbp             | 0.0424581   | 0.182326  | 2.10241      | 0.0517081 | 0.263703  |
| C430048L16Rik    | 0.467144    | 0.677259  | 0            | 1         | 1         |
| C430048L16Rik_j2 | 0.350234    | 0.518445  | 0            | 1         | 1         |
| XLOC_022711      | 0.131963    | 0.082062  | 0            | 1         | 1         |
| XLOC_022711      | 0.32896     | 0.507503  | 0            | 1         | 1         |
| XLOC_022711      | 0.147359    | 0.232927  | 0            | 1         | 1         |
| XLOC_022712      | 0.120241    | 0.136554  | 0            | 1         | 1         |
| XLOC_022713      | 0.279052    | 0.331774  | 0.249665     | 0.613174  | 0.847467  |
| XLOC_022713      | 0.121537    | 0.217185  | 0.837531     | 0.319346  | 0.662717  |
| Sfrs18_j1        | 0.512915    | 0.274076  | 0            | 1         | 1         |
| Sfrs18_j6        | 2.99738     | 2.7224    | 0            | 1         | 1         |
| Sfrs18_j7        | 3.43143     | 3.61999   | 0            | 1         | 1         |
| Fbxl4_j5         | 6.5544      | 6.48101   | 0            | 1         | 1         |
| Mms22l_j2        | 0.0395826   | 0.0506802 | 0.356555     | 0.744303  | 1         |
| Epha7_j4         | 0           | 0.0778641 | 1.79769e+308 | 0.048536  | 1         |

|                  |             |           |              |           |           |
|------------------|-------------|-----------|--------------|-----------|-----------|
| Map3k7_j3        | 1.54229     | 1.73155   | 0            | 1         | 1         |
| Bach2_j8         | 1.00803     | 0.564563  | -0.836333    | 0.009885  | 0.08499   |
| Casp8ap2         | 0.0683309   | 0.822654  | 0            | 1         | 1         |
| Mdn1_j3          | 0.150177    | 0.240428  | 0            | 1         | 1         |
| Srsf13b          | 0.112221    | 0.282052  | 0            | 1         | 1         |
| Cnr1_j1          | 0           | 0.393439  | 1.79769e+308 | 6.32E-07  | 2.78E-05  |
| Dnaja1_j2        | 0.138044    | 0.0675445 | 0            | 1         | 1         |
| Chmp5_j1         | 6.42924     | 12.0271   | 0            | 1         | 1         |
| Gm2506_j1        | 1.67636     | 1.20475   | -0.476599    | 0.348116  | 0.686627  |
| N28178           | 4.4277      | 3.83875   | 0            | 1         | 1         |
| N28178_j15       | 26.4825     | 38.3722   | 0            | 1         | 1         |
| Dnajb5_j1        | 0.197134    | 0.442262  | 1.16572      | 0.117352  | 0.426112  |
| Unc13b_j2        | 0.0992419   | 0.12612   | 0.345779     | 0.531102  | 1         |
| Unc13b_j10       | 0.169106    | 0.270186  | 0.676021     | 0.144641  | 0.471991  |
| Atp8b5_j7        | 0.17514     | 0.238131  | 0.443247     | 0.670044  | 0.875195  |
| Rusc2_j8         | 6.47217     | 4.95065   | 0            | 1         | 1         |
| Tesk1_j1         | 7.38293     | 7.58937   | 0.0397863    | 0.808659  | 0.937148  |
| Creb3            | 18.1771     | 21.5357   | 0            | 1         | 1         |
| Hrct1            | 0.187833    | 0.34906   | 0.894027     | 0.154657  | 0.487817  |
| Reck_j8          | 0.529126    | 0.287957  | -0.877758    | 0.101639  | 0.395002  |
| XLOC_022807      | 0.0198581   | 0.0797181 | 2.00518      | 0.513058  | 1         |
| Frmpd1_j4        | 21.6096     | 18.9256   | 0            | 1         | 1         |
| Rg9mtd3_j2       | 2.04655     | 1.98721   | -0.0424478   | 0.811964  | 0.938348  |
| Tmod1_j1         | 0           | 0.172264  | 1.79769e+308 | 0.0415225 | 0.229665  |
| Anp32b_j6        | 6.67182     | 8.82332   | 0.403243     | 0.0694814 | 0.316099  |
| Galnt12_j1       | 0           | 0.0896762 | 1.79769e+308 | 0.0753974 | 1         |
| Col15a1_j3       | 4.28264     | 6.84308   | 0.676145     | 1.02E-05  | 0.0003145 |
| Tmeff1_j2        | 2.062       | 1.79602   | 0            | 1         | 1         |
| Tmeff1           | 0.00110713  | 1.42966   | 0            | 1         | 1         |
| Tmeff1_j4        | 2.32443     | 0.921934  | 0            | 1         | 1         |
| E130309F12Rik_j2 | 0.227871    | 0.233762  | 0.036822     | 0.955474  | 0.987197  |
| Rnf20            | 0.738914    | 0.662211  | 0            | 1         | 1         |
| AK019691_j1      | 0.0487113   | 0.167813  | 1.78452      | 0.0885006 | 0.364451  |
| Fsd1l_j3         | 9.77175     | 9.24422   | 0            | 1         | 1         |
| Zfp462_j1        | 1.62248     | 1.28      | 0            | 1         | 1         |
| Akap2_j3         | 0           | 0.195016  | 1.79769e+308 | 0.0032004 | 0.0363106 |
| E130308A19Rik_j2 | 0.000117505 | 0.0668227 | 9.15147      | 0.83144   | 1         |
| XLOC_022870      | 0.115282    | 0.0820773 | -0.490116    | 0.548471  | 1         |
| Zfp618_j5        | 0           | 0.12107   | 1.79769e+308 | 0.0001062 | 1         |
| Col27a1_j4       | 0           | 0.0573718 | 1.79769e+308 | 0.0184078 | 1         |
| Col27a1_j5       | 0           | 0.0823752 | 1.79769e+308 | 0.0036108 | 1         |
| Col27a1_j2       | 0.355404    | 0.27896   | -0.349402    | 0.333593  | 0.67451   |
| Col27a1_j14      | 0.327154    | 0.395721  | 0.274514     | 0.536772  | 0.80709   |
| Pappa_j1         | 0           | 0.110395  | 0            | 1         | 1         |
| Tlr4_j1          | 0           | 0.0758444 | 1.79769e+308 | 0.0018026 | 1         |
| D4Bwg0951e_j1    | 0           | 0.181269  | 1.79769e+308 | 0.102484  | 0.39663   |
| Cntln_j1         | 0.00144418  | 0.235402  | 7.34873      | 0.0352425 | 0.206683  |

|                  |           |           |               |           |           |
|------------------|-----------|-----------|---------------|-----------|-----------|
| Cntln            | 1.63927   | 1.08853   | -0.590671     | 0.0540135 | 0.270834  |
| BC057079_j4      | 0         | 0.0642014 | 1.79769e+308  | 0.0297071 | 1         |
| XLOC_022929      | 0.272878  | 0.426491  | 0             | 1         | 1         |
| Fggy_j1          | 0.194839  | 0.216694  | 0.153373      | 0.838506  | 0.948612  |
| Fggy_j4          | 0.170193  | 0.360485  | 1.08277       | 0.136443  | 0.459421  |
| Hook1_j1         | 0         | 0.0601323 | 1.79769e+308  | 0.0143755 | 1         |
| Hook1_j3         | 0.0991336 | 0.111036  | 0.163587      | 0.82044   | 1         |
| Inadl_j2         | 0.0438731 | 0.104673  | 1.25448       | 0.470996  | 1         |
| Inadl_j3         | 0.240799  | 0.215657  | -0.159092     | 0.783626  | 0.9271    |
| Inadl_j5         | 0.145132  | 0.159527  | 0.136428      | 0.9055    | 0.969961  |
| Inadl_j9         | 4.81632   | 2.77038   | 0             | 1         | 1         |
| Usp1_j2          | 0.150697  | 0.141809  | -0.0877093    | 0.940456  | 0.981888  |
| Usp1_j3          | 1.41965   | 1.2331    | -0.203251     | 0.491081  | 0.780238  |
| Efcab7_j3        | 0.202207  | 0.492206  | 1.28343       | 0.0701054 | 0.317872  |
| Ak4_j1           | 0.068103  | 0.147359  | 1.11354       | 0.301875  | 1         |
| Dnajc6           | 5.67667   | 4.50055   | 0             | 1         | 1         |
| Pde4b_j3         | 0.462977  | 0.830738  | 0             | 1         | 1         |
| Tctex1d1_j3      | 0.137877  | 0.266907  | 0.952956      | 0.175102  | 0.513344  |
| Tctex1d1_j2      | 3.66E-05  | 0.10387   | 11.4688       | 0.96695   | 1         |
| Mier1_j2         | 0.469351  | 0.671093  | 0.515847      | 0.0994054 | 0.390293  |
| Mier1_j3         | 0.0637684 | 0.427934  | 2.74647       | 1.05E-05  | 0.0003212 |
| Mier1_j5         | 2.75209   | 3.22041   | 0.226716      | 0.18452   | 0.524945  |
| Dab1             | 0         | 0.0556418 | 1.79769e+308  | 0.0210319 | 1         |
| Dab1_j4          | 0.0810998 | 0.0163139 | -2.31359      | 0.0779347 | 1         |
| Dab1_j10         | 2.19E-05  | 0.0651139 | 11.5358       | 0.957318  | 1         |
| Dab1_j11         | 0.204051  | 0.256488  | 0.329962      | 0.511311  | 0.791501  |
| 1700024P16Rik_j3 | 0.335517  | 0.883197  | 1.39635       | 1.74E-05  | 0.0004959 |
| Usp24_j5         | 0         | 0.343269  | 1.79769e+308  | 3.08E-08  | 1.93E-06  |
| Hspb11           | 5.4305    | 7.47359   | 0.460718      | 0.0848996 | 0.355652  |
| Yipf1_j1         | 14.0537   | 12.0268   | -0.224695     | 0.180946  | 0.520814  |
| Glis1_j1         | 0         | 0.0865189 | 1.79769e+308  | 0.0440834 | 1         |
| Glis1_j7         | 0.103622  | 0.165103  | 0.672043      | 0.356146  | 0.692054  |
| Slc1a7_j2        | 0         | 0.0691334 | 1.79769e+308  | 0.0459523 | 1         |
| Zcchc11_j9       | 0.256452  | 0.346036  | 0.432233      | 0.189597  | 0.531397  |
| Cc2d1b_j1        | 6.78147   | 6.92759   | 0.030756      | 0.754603  | 0.915367  |
| Txndc12_j2       | 2.88574   | 3.27508   | 0.182589      | 0.361203  | 0.695804  |
| Nrd1_j4          | 0.479554  | 1.62957   | 0             | 1         | 1         |
| Calr4_j7         | 0.25053   | 0.269875  | 0.107309      | 0.868928  | 0.958391  |
| Eps15_j2         | 26.6963   | 26.4747   | 0             | 1         | 1         |
| Eps15_j4         | 24.0881   | 22.1582   | 0             | 1         | 1         |
| Faf1_j4          | 18.471    | 20.4188   | 0.144634      | 0.187531  | 0.528451  |
| Gm12824          | 0.118179  | 0.225258  | 0.930607      | 0.0823151 | 0.349548  |
| 9130206I24Rik_j2 | 0         | 0.0878989 | 1.79769e+308  | 0.078238  | 1         |
| 9130206I24Rik_j6 | 0.0748622 | 0.101747  | 0.442678      | 0.696092  | 1         |
| Gm12848          | 0.427977  | 0.497589  | 0.21742       | 0.746567  | 0.911752  |
| Atpaf1_j2        | 0.0507146 | 0.20737   | 2.03174       | 0.0510778 | 0.261892  |
| Mobkl2c_j3       | 0.21428   | 0         | -1.79769e+308 | 3.06E-05  | 0.0007862 |

|               |             |           |              |           |           |
|---------------|-------------|-----------|--------------|-----------|-----------|
| XLOC_023009   | 0           | 0.162618  | 1.79769e+308 | 0.0126605 | 0.102108  |
| Pik3r3_j3     | 6.11551     | 6.36743   | 0            | 1         | 1         |
| Gbbp1l1_j1    | 0.242202    | 0.329664  | 0.444787     | 0.220384  | 0.567249  |
| Ccdc17_j3     | 0.0321885   | 0.066432  | 1.04533      | 0.549799  | 1         |
| Ccdc17_j4     | 0.0396567   | 0.064723  | 0.706714     | 0.642213  | 1         |
| Ccdc163_j8    | 0.231473    | 0.128354  | -0.850713    | 0.329891  | 0.671905  |
| Ccdc163       | 0.472125    | 0.619229  | 0.391305     | 0.388982  | 0.716261  |
| Ccdc163_j14   | 0           | 0.319006  | 1.79769e+308 | 0.025711  | 0.167586  |
| Hectd3_j2     | 5.01827     | 5.41037   | 0.108536     | 0.566442  | 0.824486  |
| Eif2b3_j1     | 0.320248    | 0.993396  | 1.63318      | 0.0029793 | 0.0342587 |
| Eri3_j2       | 29.3554     | 27.0317   | 0            | 1         | 1         |
| XLOC_023033   | 0.160066    | 0.123028  | 0            | 1         | 1         |
| XLOC_023033   | 0.178868    | 0.162845  | 0            | 1         | 1         |
| Hivep3_j3     | 0.371548    | 0.93572   | 0            | 1         | 1         |
| Hivep3_j5     | 1.21914     | 1.15655   | 0            | 1         | 1         |
| Col9a2_j5     | 0.758942    | 1.04068   | 0.455467     | 0.188713  | 0.530379  |
| Heyl_j1       | 6.49E-05    | 0.189941  | 11.5153      | 0.874894  | 0.960222  |
| Pabpc4_j2     | 2.8202      | 3.28909   | 0.221888     | 0.689785  | 0.885099  |
| Pabpc4_j4     | 1.45555     | 2.29091   | 0.654356     | 0.0255791 | 0.166927  |
| Pabpc4_j5     | 0.131921    | 0.0491212 | -1.42526     | 0.194629  | 1         |
| Fhl3_j1       | 0.124985    | 0.189719  | 0.60211      | 0.489119  | 0.77951   |
| Fhl3_j6       | 0.243017    | 0.499355  | 1.03901      | 0.087031  | 0.360685  |
| Yrdc_j3       | 17.7072     | 15.5067   | -0.191449    | 0.074474  | 0.329105  |
| AK134673_j3   | 0.164059    | 0.122359  | -0.423099    | 0.487752  | 0.778451  |
| AK134673_j4   | 0.291753    | 0.239543  | -0.284464    | 0.538518  | 0.807929  |
| Gnl2_j3       | 0           | 0.254843  | 0            | 1         | 1         |
| Gnl2_j6       | 0.0429262   | 0.34154   | 0            | 1         | 1         |
| Meaf6         | 8.15753     | 9.66274   | 0.2443       | 0.21988   | 0.566614  |
| Csf3r_j8      | 0.000308207 | 0.0568531 | 7.5272       | 0.834933  | 1         |
| Trappc3_j1    | 31.7127     | 33.0212   | 0.0583323    | 0.666305  | 0.873605  |
| Sfpq_j5       | 8.7917      | 8.47884   | 0            | 1         | 1         |
| Zmym6_j9      | 0.228602    | 0.504615  | 1.14234      | 0.0156781 | 0.118446  |
| XLOC_023094   | 0.648998    | 0.805405  | 0.3115       | 0.117004  | 0.425262  |
| Phc2          | 2.28636     | 2.15107   | 0            | 1         | 1         |
| Trim62_j2     | 7.64148     | 7.39577   | -0.0471513   | 0.715658  | 0.897263  |
| Rnf19b_j3     | 4.29791     | 8.44272   | 0            | 1         | 1         |
| Tmem54_j2     | 1.17278     | 1.04585   | -0.165263    | 0.562852  | 0.822297  |
| Fndc5_j4      | 0           | 0.378205  | 1.79769e+308 | 0.026707  | 0.171984  |
| Sync          | 5.92987     | 5.32955   | -0.153986    | 0.381508  | 0.711932  |
| Zbtb8os_j3    | 0.236183    | 0.187745  | -0.331137    | 0.398552  | 0.722606  |
| Marcks1_j1    | 1.63213     | 3.76041   | 1.20414      | 1.74E-05  | 0.0004948 |
| 2510006D16Rik | 13.1293     | 12.9074   | 0            | 1         | 1         |
| Ptp4a2_j4     | 0           | 0.174512  | 1.79769e+308 | 0.0106205 | 0.0894136 |
| Bai2_j3       | 0.683603    | 0.327427  | -1.06199     | 0.0046612 | 0.0481423 |
| Fabp3_j1      | 1.68773     | 1.66845   | 0            | 1         | 1         |
| Pum1_j6       | 0.362165    | 0.538036  | 0.571057     | 0.112826  | 0.418103  |
| Pum1_j12      | 0.313872    | 0.0494546 | -2.666       | 0.0019841 | 0.0248178 |



|                  |            |           |              |           |           |
|------------------|------------|-----------|--------------|-----------|-----------|
| Fgr_j3           | 4.55E-05   | 0.127052  | 11.4462      | 0.973734  | 1         |
| Cd164l2_j1       | 0.316414   | 0.349321  | 0.142741     | 0.811979  | 0.938348  |
| Map3k6_j3        | 0.105349   | 0.358285  | 1.76593      | 0.0001236 | 0.0025623 |
| Slc9a1_j1        | 12.0707    | 11.1418   | 0            | 1         | 1         |
| Ubxn11_j1        | 0.0322635  | 0.18609   | 2.52803      | 0.0583115 | 0.283551  |
| Stmn1_j9         | 25.753     | 38.0583   | 0.563472     | 1.34E-07  | 6.96E-06  |
| Paqr7_j2         | 1.25114    | 1.36654   | 0.127284     | 0.621555  | 0.851784  |
| Syf2_j1          | 4.21821    | 5.90633   | 0.485632     | 0.0249014 | 0.163777  |
| Srsf10_j3        | 0          | 0.0787074 | 1.79769e+308 | 0.0465111 | 1         |
| Hnrnpr_j3        | 0.124875   | 0.0332499 | -1.90907     | 0.0204782 | 1         |
| XLOC_023173      | 0.0866365  | 0.114046  | 0.396567     | 0.615969  | 1         |
| XLOC_023181      | 0.146335   | 0.279222  | 0.932141     | 0.114407  | 0.420859  |
| XLOC_023183      | 0.196916   | 0.210473  | 0.096057     | 0.885619  | 0.963692  |
| Hspg2_j10        | 4.32944    | 5.38016   | 0.313471     | 0.0232069 | 0.156065  |
| Hspg2_j11        | 2.2231     | 3.17158   | 0.512627     | 0.0145249 | 0.112329  |
| Usp48_j6         | 0.888633   | 1.00968   | 0.184232     | 0.449848  | 0.755765  |
| Eif4g3_j6        | 2.29007    | 1.57432   | -0.540665    | 0.0049084 | 0.0499755 |
| Eif4g3_j5        | 0.895649   | 0.767557  | -0.222661    | 0.398689  | 0.722617  |
| Eif4g3_j16       | 0          | 0.0832174 | 1.79769e+308 | 0.0103788 | 1         |
| Hp1bp3           | 1.06261    | 0.96777   | -0.134871    | 0.719861  | 0.899373  |
| Kif17_j4         | 0.388013   | 0.518891  | 0            | 1         | 1         |
| Kif17_j7         | 0.0146957  | 0.122798  | 0            | 1         | 1         |
| XLOC_023199      | 0.00673691 | 0.0946329 | 3.81218      | 0.336628  | 1         |
| XLOC_023199      | 0.258066   | 0.346752  | 0.426162     | 0.237048  | 0.583799  |
| Ubr4_j11         | 7.15198    | 7.90912   | 0.145174     | 0.157229  | 0.491067  |
| Padi2_j1         | 0.201737   | 0.0462255 | -2.12571     | 0.0156998 | 0.118591  |
| Padi2_j3         | 0          | 0.0846984 | 1.79769e+308 | 0.0184829 | 1         |
| Atp13a2_j2       | 0.749298   | 0.593192  | 0            | 1         | 1         |
| Fbxo42_j2        | 0          | 0.217243  | 0            | 1         | 1         |
| Fbxo42_j5        | 0.433013   | 0.524526  | 0            | 1         | 1         |
| 6330545A04Rik_j1 | 0          | 0.152616  | 1.79769e+308 | 0.0422173 | 1         |
| Zbtb17_j3        | 0.116426   | 0.12223   | 0.0701788    | 0.846347  | 1         |
| AK145533_j1      | 0.298387   | 0.350333  | 0.231543     | 0.769321  | 0.921491  |
| Gm13152_j3       | 0.366544   | 0.348335  | -0.0735136   | 0.901155  | 0.968642  |
| Gm13152_j5       | 0          | 0.143075  | 1.79769e+308 | 0.0962953 | 1         |
| Mthfr_j3         | 1.37771    | 1.35953   | 0            | 1         | 1         |
| Mthfr_j2         | 0.192784   | 0.350457  | 0            | 1         | 1         |
| Mad2l2_j2        | 2.98254    | 4.92008   | 0            | 1         | 1         |
| Mad2l2_j1        | 1.34109    | 2.19112   | 0            | 1         | 1         |
| Fbxo2_j3         | 2.02625    | 2.20147   | 0            | 1         | 1         |
| Ctnnbip1_j3      | 2.2773     | 2.49209   | 0            | 1         | 1         |
| XLOC_023268      | 0.231208   | 0.156053  | -0.567157    | 0.461684  | 0.76296   |
| Slc2a5_j5        | 0.287904   | 0.0657454 | -2.13063     | 0.0448887 | 0.242154  |
| Gm5506_j2        | 0.322949   | 0.368403  | 0            | 1         | 1         |
| Rere_j11         | 0          | 0.0530712 | 1.79769e+308 | 0.0136427 | 1         |
| mKIAA0720_j4     | 0.0227763  | 0.0935875 | 0            | 1         | 1         |
| mKIAA0720_j7     | 0.112194   | 0         | 0            | 1         | 1         |

|                  |             |           |              |           |           |
|------------------|-------------|-----------|--------------|-----------|-----------|
| mKIAA0720_j9     | 0.000121466 | 0.0705955 | 0            | 1         | 1         |
| Acot7_j3         | 80.0251     | 112.803   | 0.495283     | 2.56E-07  | 1.24E-05  |
| Gpr153_j2        | 3.14281     | 6.79638   | 0            | 1         | 1         |
| Wdr8_j1          | 0.0277032   | 0.0531501 | 0            | 1         | 1         |
| Wdr8_j3          | 0.047132    | 0.100896  | 1.09809      | 0.403494  | 1         |
| Megf6_j4         | 0           | 0.0982907 | 1.79769e+308 | 0.0006471 | 1         |
| Megf6_j3         | 0.11844     | 0.138669  | 0.227491     | 0.622891  | 1         |
| Mmel1_j1         | 0.0133599   | 0.055069  | 2.04333      | 0.191299  | 1         |
| Pex10_j1         | 2.5905      | 2.58365   | 0            | 1         | 1         |
| 2610002J02Rik_j1 | 3.06286     | 7.13971   | 0            | 1         | 1         |
| 2610002J02Rik_j3 | 0           | 0.359308  | 0            | 1         | 1         |
| C030017K20Rik_j1 | 0.102864    | 0.0827612 | -0.313718    | 0.66877   | 1         |
| Gnb1_j8          | 58.7496     | 58.6788   | 0            | 1         | 1         |
| Cdk11b_j2        | 0.644808    | 0.954004  | 0            | 1         | 1         |
| Gm5151_j3        | 0           | 0.220532  | 0            | 1         | 1         |
| AK035229_j1      | 1.26221     | 1.52213   | 0.270137     | 0.181257  | 0.521122  |
| Ccnl2_j2         | 2.64206     | 3.26919   | 0.307272     | 0.0876475 | 0.362377  |
| Ccnl2            | 3.09172     | 3.45719   | 0.161186     | 0.492207  | 0.780855  |
| Aurkaip1_j4      | 50.0368     | 51.3785   | 0            | 1         | 1         |
| Mxra8            | 4.16459     | 3.20355   | 0            | 1         | 1         |
| Mxra8            | 1.17299     | 2.13046   | 0            | 1         | 1         |
| Mxra8_j7         | 4.61228     | 4.05662   | 0            | 1         | 1         |
| asp3             | 1.85205     | 3.54729   | 0            | 1         | 1         |
| Dvl1_j1          | 2.08468     | 2.53165   | 0.280254     | 0.2165    | 0.562566  |
| Acap3_j6         | 0.862755    | 2.16729   | 1.32887      | 1.64E-05  | 0.000472  |
| Acap3_j7         | 0.0558166   | 0.434606  | 2.96094      | 0.00145   | 0.0191955 |
| Ube2j2_j2        | 1.84854     | 2.49241   | 0.431152     | 0.148452  | 0.477336  |
| Fam132a_j3       | 0.64246     | 0.98298   | 0.613556     | 0.316219  | 0.660027  |
| Sdf4_j5          | 5.98988     | 6.51798   | 0            | 1         | 1         |
| Sdf4_j4          | 0.0329637   | 0.309848  | 0            | 1         | 1         |
| Plag1_j4         | 0.0766738   | 0.201928  | 1.39703      | 0.0095054 | 0.0824333 |
| Nsmaf_j5         | 13.3582     | 11.0011   | 0            | 1         | 1         |
| Car8_j2          | 3.85724     | 4.20093   | 0            | 1         | 1         |
| 2310030N02Rik_j1 | 0.0996949   | 0.198836  | 0.99599      | 0.430011  | 0.743005  |
| Ints8_j3         | 0           | 0.0821652 | 1.79769e+308 | 0.023425  | 1         |
| Ints8_j5         | 0.421561    | 0.635761  | 0.592744     | 0.126355  | 0.442698  |
| Ints8_j6         | 0           | 0.0528843 | 1.79769e+308 | 0.0795511 | 1         |
| Dpy19l4_j2       | 0.149848    | 0.536356  | 0            | 1         | 1         |
| Dpy19l4_j4       | 0           | 0.185074  | 0            | 1         | 1         |
| Tmem67_j1        | 0.0438944   | 0.0911655 | 1.05445      | 0.38415   | 1         |
| Fam92a_j7        | 4.28583     | 5.87303   | 0            | 1         | 1         |
| Fam92a_j10       | 1.25405     | 2.11419   | 0            | 1         | 1         |
| Otud6b           | 1.50841     | 1.40601   | 0            | 1         | 1         |
| Necab1_j4        | 4.11389     | 3.95169   | 0            | 1         | 1         |
| Rip2_j5          | 0.163737    | 0.248138  | 0            | 1         | 1         |
| Cpne3_j1         | 0.183224    | 0.182764  | 0            | 1         | 1         |
| Wwp1_j3          | 0.139308    | 0.11085   | -0.32967     | 0.701091  | 0.890145  |

|                  |           |           |               |           |           |
|------------------|-----------|-----------|---------------|-----------|-----------|
| Wwp1_j4          | 0         | 0.0860214 | 1.79769e+308  | 0.0384387 | 1         |
| Klhl32_j4        | 0         | 0.211473  | 1.79769e+308  | 5.65E-06  | 0.000188  |
| Ufl1_j2          | 0.371703  | 0.380557  | 0.0339624     | 0.921908  | 0.975553  |
| XLOC_023381      | 0.0367168 | 0.239269  | 2.70412       | 1         | 1         |
| Pnrc1_j2         | 0         | 0.282977  | 1.79769e+308  | 0.024845  | 0.163552  |
| Orc3_j6          | 0.148455  | 0.146238  | -0.0217034    | 0.961035  | 0.988961  |
| Lingo2_j5        | 0.603977  | 0.333801  | 0             | 1         | 1         |
| Aptx_j1          | 0.0630017 | 0.0554879 | 0             | 1         | 1         |
| Aptx             | 0.334333  | 0.445984  | 0             | 1         | 1         |
| Aptx             | 0.206535  | 0.222378  | 0             | 1         | 1         |
| B4galt1_j1       | 3.79563   | 4.32715   | 0             | 1         | 1         |
| Nol6_j2          | 1.01815   | 0.776042  | 0             | 1         | 1         |
| Udap2_j9         | 0.0428407 | 0.13038   | 0             | 1         | 1         |
| Dcaf12_j3        | 0         | 0.137913  | 1.79769e+308  | 0.0090155 | 1         |
| Smrp1_j5         | 0.107856  | 0.13548   | 0.328975      | 0.687322  | 1         |
| 2310028H24Rik_j4 | 32.5228   | 35.5331   | 0             | 1         | 1         |
| Cntfr_j3         | 1.30617   | 1.60708   | 0             | 1         | 1         |
| Cntfr_j4         | 0         | 0.619676  | 0             | 1         | 1         |
| Gm13307_j1       | 0.992967  | 0.889003  | -0.159557     | 0.766823  | 0.920508  |
| Vcp_j7           | 3.40644   | 4.09879   | 0.266934      | 0.251458  | 0.599331  |
| Vcp_j8           | 0.433506  | 0.463651  | 0.0969878     | 0.78134   | 0.926147  |
| Vcp_j12          | 0.603482  | 0.79788   | 0.402862      | 0.472125  | 0.769302  |
| Fancg_j1         | 0.67395   | 0.555714  | -0.278297     | 0.464671  | 0.764888  |
| Stoml2_j1        | 10.7323   | 10.2538   | -0.0657983    | 0.687592  | 0.883891  |
| B230312A22Rik_j7 | 3.96316   | 5.4728    | 0             | 1         | 1         |
| B230312A22Rik_j8 | 0.791845  | 1.61211   | 0             | 1         | 1         |
| Spag8_j1         | 0.100855  | 0.154654  | 0.616757      | 0.512082  | 1         |
| Rnf38_j6         | 0         | 0.527914  | 0             | 1         | 1         |
| 5830415F09Rik    | 0         | 0.195545  | 1.79769e+308  | 0.0111776 | 0.0931224 |
| 5830415F09Rik_j2 | 0.698491  | 0.842297  | 0.270088      | 0.440833  | 0.749739  |
| Trim14_j1        | 0.11831   | 0         | -1.79769e+308 | 0.0574606 | 1         |
| Trim14_j2        | 0         | 0.0717132 | 1.79769e+308  | 0.152193  | 1         |
| Tbc1d2_j3        | 0.33896   | 0.280086  | -0.275247     | 0.612179  | 0.847323  |
| Gabbr2_j1        | 12.3288   | 16.5616   | 0             | 1         | 1         |
| Anks6_j5         | 0.0939151 | 0.204915  | 1.1256        | 0.0156769 | 0.118446  |
| Anks6_j11        | 0.417261  | 0.37864   | -0.140126     | 0.662679  | 0.872159  |
| XLOC_023464      | 0.0799834 | 0.0655855 | -0.286324     | 0.814467  | 1         |
| XLOC_023465      | 0.0251838 | 0.111524  | 2.14678       | 0.157726  | 1         |
| Abca1_j2         | 4.97244   | 10.7013   | 0             | 1         | 1         |
| AK141187_j1      | 0.037339  | 0.131376  | 1.81495       | 0.0929527 | 1         |
| AK141187_j4      | 0.0234057 | 0.154301  | 2.72081       | 0.11497   | 1         |
| lkbkap_j4        | 7.22629   | 9.08128   | 0.32964       | 0.0750607 | 0.330768  |
| Ctnnal1_j4       | 1.39459   | 2.97698   | 0             | 1         | 1         |
| Epb4.1l4b_j8     | 0         | 0.200003  | 1.79769e+308  | 5.82E-05  | 0.0013554 |
| Ptpn3_j5         | 0         | 0.132387  | 0             | 1         | 1         |
| AK133010_j1      | 0.0778653 | 0.328247  | 2.07573       | 0.0002262 | 0.0042503 |
| Lpar1_j1         | 1.01513   | 3.80705   | 0             | 1         | 1         |

|             |            |           |              |           |           |
|-------------|------------|-----------|--------------|-----------|-----------|
| Al314180_j1 | 8.03798    | 5.56491   | 0            | 1         | 1         |
| Susd1_j1    | 0.0110404  | 0.235695  | 4.41606      | 0.051361  | 0.262648  |
| Rod1_j1     | 0          | 0.0609031 | 1.79769e+308 | 0.0118303 | 1         |
| Rod1_j2     | 1.31969    | 1.51521   | 0.19932      | 0.293981  | 0.640842  |
| Mup20       | 0.09194    | 0.148878  | 0.695367     | 0.522891  | 1         |
| Zfp37_j2    | 1.1247     | 1.28912   | 0.196847     | 0.396728  | 0.721313  |
| Fkbp15_j1   | 6.03131    | 6.23803   | 0            | 1         | 1         |
| Cdc26_j4    | 5.10011    | 5.38351   | 0.0780172    | 0.63635   | 0.859038  |
| Wdr31       | 0.096127   | 0.204433  | 1.08862      | 0.152997  | 0.48502   |
| Akna_j1     | 0.0903829  | 0.225602  | 1.31966      | 0.0045755 | 0.0475091 |
| Whrn_j5     | 0.366842   | 0.0390948 | 0            | 1         | 1         |
| XLOC_023520 | 0.0360789  | 0.155836  | 2.1108       | 0.0292848 | 1         |
| Dbc1_j2     | 4.38585    | 4.54075   | 0            | 1         | 1         |
| Cdk5rap2_j4 | 0.302169   | 0.10551   | -1.51797     | 0.0017246 | 0.0222032 |
| Tle1_j7     | 4.69207    | 6.64388   | 0            | 1         | 1         |
| Tle1_j13    | 0.265677   | 0.285136  | 0            | 1         | 1         |
| Ptprd_j3    | 0          | 0.102691  | 1.79769e+308 | 0.0011428 | 1         |
| Mpdz_j8     | 1.87477    | 2.31883   | 0.30668      | 0.121536  | 0.434092  |
| Zdhhc21_j1  | 0.0258323  | 0.650437  | 0            | 1         | 1         |
| Frem1_j1    | 0.0537404  | 0.0582608 | 0.116519     | 0.893306  | 1         |
| Gm12414_j2  | 0.161076   | 0.123904  | -0.37852     | 0.484083  | 0.776282  |
| Gm12414_j1  | 0.00048563 | 0.0997195 | 7.68187      | 0.328997  | 1         |
| Bnc2_j7     | 0.0367839  | 0.232906  | 0            | 1         | 1         |
| Plin2_j4    | 1.69258    | 3.41899   | 0            | 1         | 1         |
| Plin2_j5    | 16.0496    | 44.9345   | 0            | 1         | 1         |
| Plin2_j6    | 3.13793    | 10.9506   | 0            | 1         | 1         |
| Slc24a2_j7  | 0          | 0.247306  | 0            | 1         | 1         |
| XLOC_023558 | 0.10634    | 0.0650708 | -0.708595    | 0.616145  | 1         |
| Elavl2_j7   | 14.9207    | 7.70805   | 0            | 1         | 1         |
| Mysm1_j2    | 0.810919   | 1.00168   | 0            | 1         | 1         |
| XLOC_023578 | 0.365163   | 0.539292  | 0.562526     | 0.645489  | 0.863342  |
| Tm2d1_j2    | 0.00078458 | 0.445448  | 9.14912      | 0.785985  | 0.928311  |
| Tm2d1_j6    | 0.796231   | 0.727275  | -0.130687    | 0.865893  | 0.957262  |
| Itgb3bp_j1  | 0.13785    | 0.10853   | -0.344999    | 0.598182  | 0.840629  |
| Jak1_j1     | 0          | 0.0563209 | 0            | 1         | 1         |
| Jak1_j7     | 1.47606    | 3.4697    | 0            | 1         | 1         |
| Wdr78_j3    | 0.673913   | 0.574159  | -0.231112    | 0.52054   | 0.79793   |
| Slc35d1_j2  | 0.457117   | 0.980658  | 0            | 1         | 1         |
| Pcsk9_j2    | 0.0389432  | 0.0943333 | 1.27639      | 0.209107  | 1         |
| Ttc4_j4     | 4.56803    | 4.05402   | 0            | 1         | 1         |
| Lrrc42_j1   | 4.71377    | 5.23528   | 0.151385     | 0.447437  | 0.754174  |
| Podn        | 0          | 0.207393  | 1.79769e+308 | 0.0006079 | 0.0095863 |
| Zyg11b_j4   | 0.0834304  | 0.230475  | 0            | 1         | 1         |
| Fam159a_j1  | 0.135295   | 0.779413  | 2.52628      | 0.0278579 | 0.176964  |
| Fam159a_j2  | 0          | 0.265022  | 1.79769e+308 | 0.0088534 | 0.0782415 |
| Prpf38a_j2  | 0          | 0.0503578 | 0            | 1         | 1         |
| Btf3l4      | 0.715649   | 1.0599    | 0.566608     | 0.021193  | 0.146549  |

|                  |           |             |              |           |           |
|------------------|-----------|-------------|--------------|-----------|-----------|
| Elavl4_j6        | 1.04772   | 1.86493     | 0            | 1         | 1         |
| Nsun4_j2         | 3.25163   | 3.09051     | 0            | 1         | 1         |
| Mast2_j1         | 13.0115   | 13.7772     | 0.0824964    | 0.518561  | 0.796493  |
| Btbd19_j2        | 0.243224  | 0.16014     | -0.602948    | 0.481359  | 0.775     |
| Plk3_j1          | 2.47798   | 3.5451      | 0.516664     | 0.0218324 | 0.149715  |
| Rps8_j3          | 0.495555  | 0.899898    | 0.860716     | 0.0535539 | 0.269451  |
| Rps8_j9          | 0.397225  | 0.19536     | -1.02382     | 0.403706  | 0.726546  |
| Kif2c_j2         | 0.125386  | 0.0926716   | -0.43618     | 0.668937  | 1         |
| Gm1661_j1        | 0.150781  | 0.231623    | 0.619325     | 0.319823  | 0.663233  |
| Dmap1_j5         | 2.57958   | 2.11442     | 0            | 1         | 1         |
| B4galt2_j1       | 1.15596   | 2.97721     | 1.36487      | 0.0004512 | 0.0074731 |
| Dph2_j1          | 0.858465  | 1.39064     | 0.695919     | 0.0474425 | 0.250092  |
| Ipo13_j6         | 0.202697  | 0.243156    | 0            | 1         | 1         |
| Ipo13_j5         | 0.212136  | 0.452334    | 0            | 1         | 1         |
| Ipo13_j11        | 0.598695  | 0.000316237 | 0            | 1         | 1         |
| Szt2_j4          | 0.287165  | 0.273329    | 0            | 1         | 1         |
| Szt2_j10         | 0.348302  | 0.293853    | 0            | 1         | 1         |
| Wdr65            | 0.234275  | 0.270543    | 0.20765      | 0.571988  | 0.827134  |
| AU022252_j3      | 0.055868  | 0.0792845   | 0.505015     | 0.375841  | 1         |
| AK005616         | 0.558365  | 0.62884     | 0.171483     | 0.698454  | 0.88879   |
| AA415398_j1      | 0.215856  | 0.0445705   | 0            | 1         | 1         |
| Nfyc_j1          | 0.12237   | 0.0285847   | -2.09794     | 0.176004  | 1         |
| Nfyc_j5          | 0.388107  | 0.252876    | -0.618026    | 0.0331323 | 0.198464  |
| Rif_j5           | 0.153759  | 0.38318     | 0            | 1         | 1         |
| Macf1_j7         | 15.399    | 18.8621     | 0.292655     | 0.0025465 | 0.0302729 |
| Macf1_j9         | 1.15334   | 1.03286     | -0.159177    | 0.312561  | 0.657095  |
| Macf1_j8         | 0.683544  | 0.606949    | -0.171459    | 0.383954  | 0.71322   |
| Maneal_j1        | 3.26412   | 3.70127     | 0.181324     | 0.109369  | 0.41154   |
| 1700029G01Rik_j1 | 0         | 0.0768072   | 1.79769e+308 | 0.0586096 | 1         |
| Thrap3_j14       | 0         | 0.634447    | 1.79769e+308 | 2.27E-05  | 0.0006131 |
| Thrap3_j11       | 1.49097   | 1.37399     | -0.117884    | 0.741259  | 0.909259  |
| Tekt2_j3         | 0.0402865 | 0.165804    | 0            | 1         | 1         |
| Eif2c3_j1        | 0         | 0.0884979   | 1.79769e+308 | 3.63E-05  | 1         |
| Eif2c4_j1        | 0.871321  | 0.808235    | -0.10843     | 0.670413  | 0.875338  |
| Eif2c4_j2        | 0.132506  | 0.167617    | 0.33911      | 0.46836   | 0.767019  |
| Ncdn_j6          | 15.6425   | 10.3647     | 0            | 1         | 1         |
| Zmym4_j1         | 0.341616  | 0.434667    | 0.347536     | 0.302794  | 0.648644  |
| Zmym4_j2         | 2.64381   | 2.71175     | 0.0366065    | 0.794985  | 0.931557  |
| Zfp362_j3        | 2.9666    | 3.37166     | 0            | 1         | 1         |
| Adc_j6           | 7.8435    | 14.5841     | 0            | 1         | 1         |
| C77080           | 1.67912   | 2.81139     | 0            | 1         | 1         |
| Zbtb8b_j1        | 0         | 0.0865235   | 1.79769e+308 | 0.024905  | 1         |
| Hdac1_j10        | 0         | 0.158947    | 1.79769e+308 | 0.0001489 | 0.0029974 |
| Fam167b_j1       | 0         | 0.209001    | 1.79769e+308 | 0.0947166 | 0.379466  |
| Eif3i_j6         | 41.0031   | 42.1998     | 0            | 1         | 1         |
| Txlna_j2         | 0.131062  | 0.0845069   | 0            | 1         | 1         |
| Txlna_j4         | 0         | 0.0746201   | 0            | 1         | 1         |

|                  |             |           |              |           |          |
|------------------|-------------|-----------|--------------|-----------|----------|
| Kpna6_j2         | 3.8506      | 4.54066   | 0            | 1         | 1        |
| Hcrtr1_j4        | 0.0985289   | 0.133951  | 0.443085     | 0.636575  | 1        |
| Ptpru_j6         | 0.0386038   | 0.106396  | 1.46263      | 0.0837348 | 1        |
| Ptpru_j7         | 0           | 0.0748175 | 1.79769e+308 | 0.0104288 | 1        |
| Epb4.1_j1        | 2.34384     | 1.99222   | -0.234498    | 0.183724  | 0.524378 |
| Trnau1ap_j4      | 2.97822     | 3.68647   | 0.307791     | 0.32973   | 0.671845 |
| Atpif1_j6        | 113.002     | 134.749   | 0            | 1         | 1        |
| Stx12_j4         | 0           | 0.0714442 | 0            | 1         | 1        |
| Arid1a_j4        | 9.37836     | 10.4331   | 0            | 1         | 1        |
| Sh3bgrl3_j1      | 509.224     | 596.797   | 0.228942     | 0.0077606 | 0.071037 |
| Extl1_j5         | 0.19584     | 0.13946   | -0.489827    | 0.500381  | 0.785042 |
| Sepn1_j6         | 0.549847    | 0.481643  | 0            | 1         | 1        |
| Sepn1_j1         | 0.652206    | 1.07564   | 0            | 1         | 1        |
| Man1c1_j2        | 2.70264     | 3.45664   | 0            | 1         | 1        |
| A330049M08Rik_j1 | 3.17931     | 3.97063   | 0            | 1         | 1        |
| Nipal3_j2        | 16.2967     | 16.8993   | 0            | 1         | 1        |
| Nipal3_j3        | 29.8661     | 27.0064   | 0            | 1         | 1        |
| C1qa_j1          | 10.4279     | 25.6295   | 1.29736      | 0         | 0        |
| Epha8_j7         | 0.0744877   | 0.112175  | 0.590672     | 0.527913  | 1        |
| Epha8_j8         | 0           | 0.138753  | 1.79769e+308 | 0.0048042 | 1        |
| Cdc42_j5         | 45.9197     | 48.2219   | 0            | 1         | 1        |
| Cdc42_j7         | 88.2407     | 96.1199   | 0            | 1         | 1        |
| Alpl_j1          | 2.60786     | 2.38143   | -0.131035    | 0.582478  | 0.832778 |
| 2310028O11Rik_j1 | 0.236873    | 0.217331  | 0            | 1         | 1        |
| Pqlc2_j6         | 0.0811474   | 0.173894  | 0            | 1         | 1        |
| Pqlc2_j5         | 1.11401     | 1.2948    | 0            | 1         | 1        |
| Igsf21_j2        | 0.254441    | 0.156043  | 0            | 1         | 1        |
| Padi4_j2         | 0.0244019   | 0.0845667 | 1.7931       | 0.429958  | 1        |
| Padi3_j1         | 0.0420606   | 0.165621  | 1.97734      | 0.099965  | 0.391607 |
| Dnajc16_j2       | 0.000676287 | 0.559177  | 0            | 1         | 1        |
| Tmem51_j1        | 0           | 0.123534  | 1.79769e+308 | 0.0265609 | 1        |
| AK018156_j2      | 0           | 0.159175  | 1.79769e+308 | 0.0439642 | 0.238753 |
| Vps13d_j12       | 0.0828785   | 0.142821  | 0            | 1         | 1        |
| Vps13d_j13       | 2.74007     | 2.68767   | 0            | 1         | 1        |
| Tnfrsf1b_j2      | 0.75997     | 1.72243   | 0            | 1         | 1        |
| Tnfrsf8          | 0.120623    | 0.962268  | 2.99594      | 3.71E-14  | 6.59E-12 |
| Gm13157_j2       | 0           | 0.295798  | 0            | 1         | 1        |
| Gm13157_j3       | 0.241762    | 0.207247  | 0            | 1         | 1        |
| Zfp933_j3        | 0.197052    | 0.388075  | 0            | 1         | 1        |
| Fbxo44           | 8.08009     | 9.89608   | 0            | 1         | 1        |
| Ubiad1           | 1.04245     | 1.36924   | 0.393392     | 0.0746659 | 0.329595 |
| XLOC_023904      | 0.169706    | 0.21768   | 0.359169     | 0.672252  | 0.876215 |
| Pex14_j1         | 0           | 0.599195  | 1.79769e+308 | 7.90E-05  | 0.001756 |
| Pgd_j2           | 4.16474     | 5.29038   | 0            | 1         | 1        |
| Kif1b_j4         | 46.8304     | 38.8313   | 0            | 1         | 1        |
| H6pd_j2          | 1.07766     | 1.37479   | 0.351307     | 0.0835429 | 0.352338 |
| H6pd             | 0           | 0.0504807 | 1.79769e+308 | 0.010967  | 1        |

|                   |             |                        |           |           |           |
|-------------------|-------------|------------------------|-----------|-----------|-----------|
| Per3_j6           | 0.218611    | 0.230841               | 0.0785357 | 0.823676  | 0.943114  |
| Per3_j7           | 0.0559858   | 0.11263                | 1.00846   | 0.135221  | 1         |
| Camta1_j1         | 4.41274     | 5.81796                | 0         | 1         | 1         |
| Camta1_j2         | 28.396      | 29.5847                | 0         | 1         | 1         |
| Camta1_j3         | 1.60594     | 1.0812                 | 0         | 1         | 1         |
| Camta1            | 4.51636     | 2.87888                | 0         | 1         | 1         |
| Zbtb48_j9         | 0.191715    | 0 -1.79769e+308        |           | 0.000175  | 0.0034399 |
| Zbtb48_j8         | 0.0221558   | 0.0972867              | 2.13456   | 0.167745  | 1         |
| Zbtb48_j11        | 0.163924    | 0.191716               | 0.225947  | 0.829264  | 0.944935  |
| Zbtb48_j12        | 0           | 0.296453 1.79769e+308  |           | 0.0008879 | 0.0130166 |
| Tas1r1_j3         | 0           | 0.0565422 1.79769e+308 |           | 0.0822016 | 1         |
| Espn_j1           | 0.196265    | 0.203717               | 0         | 1         | 1         |
| Hes3_j3           | 0.149221    | 0.0791988              | -0.913896 | 0.27729   | 0.626342  |
| Hes3_j1           | 0           | 0.0724367 1.79769e+308 |           | 0.0423649 | 1         |
| Kcnab2_j1         | 113.753     | 115.326                | 0         | 1         | 1         |
| Kcnab2_j4         | 7.04875     | 4.97494                | 0         | 1         | 1         |
| Ajap1             | 0.188882    | 0.555887               | 1.55731   | 5.03E-05  | 0.001199  |
| Prdm16            | 0.139623    | 0.319636               | 1.19489   | 0.0004939 | 0.0080574 |
| Ski_j1            | 0.303572    | 0.354475               | 0         | 1         | 1         |
| Prkcz_j7          | 0.120286    | 0.129064               | 0.101616  | 0.88333   | 1         |
| Mib2_j2           | 0.0889853   | 0.22528                | 1.34008   | 0.0126881 | 0.102195  |
| Atad3a_j8         | 2.24688     | 2.62725                | 0         | 1         | 1         |
| Vwa1_j2           | 0.728307    | 3.49356                | 0         | 1         | 1         |
| Vwa1_j3           | 0.168796    | 1.64012                | 0         | 1         | 1         |
| Tas1r3_j2         | 0.00443947  | 0.103075               | 4.53716   | 0.163569  | 1         |
| Agrn_j8           | 3.96766     | 4.42152                | 0         | 1         | 1         |
| Agrn_j12          | 0.42444     | 1.04947                | 0         | 1         | 1         |
| Agrn_j13          | 1.16232     | 2.50223                | 0         | 1         | 1         |
| Agrn_j14          | 0.696613    | 0.53884                | 0         | 1         | 1         |
| Plekhn1_j3        | 0.234788    | 0.201443               | 0         | 1         | 1         |
| Plekhn1_j4        | 0.0671832   | 0.0629957              | 0         | 1         | 1         |
| Tgs1_j1           | 0.897698    | 0.641595               | 0         | 1         | 1         |
| Chchd7_j6         | 0.262467    | 0.341899               | 0         | 1         | 1         |
| Chchd7_j3         | 0           | 0.40911                | 0         | 1         | 1         |
| 4930412C18Rik_j12 | 0.0681115   | 0.0661379              | -0.042421 | 0.962968  | 1         |
| Trp53inp1_j2      | 0.000172087 | 0.596842               | 0         | 1         | 1         |
| XLOC_022711       | 0.276551    | 0.286987               | 0         | 1         | 1         |
| XLOC_022711       | 0.197124    | 0.315732               | 0         | 1         | 1         |
| XLOC_022711       | 0.0617831   | 0.160261               | 0         | 1         | 1         |
| Gm11841           | 0.915212    | 1.14836                | 0         | 1         | 1         |
| XLOC_022713       | 0.200982    | 0.11568                | -0.796928 | 0.429998  | 0.743005  |
| Calb1_j1          | 12.147      | 10.0007                | -0.280502 | 0.113271  | 0.418908  |
| AK080160_j1       | 0.115191    | 0.172754               | 0.584689  | 0.602498  | 0.842947  |
| Ccnc_j5           | 10.5502     | 11.6418                | 0         | 1         | 1         |
| Usp45_j4          | 3.81675     | 3.85163                | 0         | 1         | 1         |
| 6230409E13Rik_j1  | 8.34358     | 9.75161                | 0         | 1         | 1         |
| 6230409E13Rik_j2  | 2.50153     | 3.56964                | 0         | 1         | 1         |

|                  |             |           |              |           |           |
|------------------|-------------|-----------|--------------|-----------|-----------|
| 6230409E13Rik    | 3.80031     | 4.5024    | 0            | 1         | 1         |
| Fbxl4_j2         | 0           | 0.161592  | 0            | 1         | 1         |
| Mms22l_j1        | 0.0359393   | 0.158025  | 2.13652      | 0.0870044 | 0.360625  |
| Epha7_j1         | 1.24E-05    | 0.161078  | 13.6605      | 0.954764  | 0.986907  |
| Map3k7_j4        | 3.33452     | 3.06606   | 0            | 1         | 1         |
| XLOC_022743      | 0           | 0.0649867 | 1.79769e+308 | 0.14285   | 1         |
| Mdn1_j4          | 1.56836     | 1.61705   | 0            | 1         | 1         |
| Mdn1_j7          | 0.525442    | 0.372088  | 0            | 1         | 1         |
| Mdn1_j8          | 2.76483     | 2.28758   | 0            | 1         | 1         |
| Cnr1_j2          | 3.76568     | 4.54594   | 0.271668     | 0.0404573 | 0.225591  |
| XLOC_022757      | 0.121119    | 0.173873  | 0.52161      | 0.534006  | 0.805363  |
| Gm12371_j1       | 2.08211     | 1.22091   | 0            | 1         | 1         |
| Aco1_j1          | 7.13507     | 7.75493   | 0.120186     | 0.330436  | 0.672338  |
| Chmp5_j2         | 38.6463     | 33.4799   | 0            | 1         | 1         |
| Ube2r2_j2        | 7.68549     | 9.03495   | 0.233379     | 0.394985  | 0.720135  |
| Nudt2_j1         | 8.87994     | 8.41662   | 0            | 1         | 1         |
| Ccl21b           | 1.82451     | 3.27573   | 0.844308     | 0.0002168 | 0.0040968 |
| N28178_j12       | 0.260482    | 0.565409  | 0            | 1         | 1         |
| Unc13b_j7        | 0           | 0.144688  | 1.79769e+308 | 0.0019379 | 1         |
| Unc13b_j8        | 0           | 0.0528002 | 1.79769e+308 | 0.0557792 | 1         |
| Unc13b_j11       | 0.462223    | 0.611958  | 0.404845     | 0.326587  | 0.669796  |
| Rusc2_j6         | 3.487       | 3.77801   | 0            | 1         | 1         |
| Rusc2            | 6.57729     | 6.52549   | 0            | 1         | 1         |
| Car9_j1          | 0.0349436   | 0.0706511 | 1.01568      | 0.521571  | 1         |
| Reck_j3          | 0           | 0.116324  | 1.79769e+308 | 0.0036506 | 1         |
| Reck_j5          | 0           | 0.151577  | 1.79769e+308 | 0.0017202 | 1         |
| Reck_j7          | 0.334009    | 0.407619  | 0.287335     | 0.517481  | 0.795769  |
| XLOC_022806      | 0           | 0.0524574 | 1.79769e+308 | 0.0269025 | 1         |
| Zcchc7_j1        | 0.123553    | 0.115744  | -0.0941895   | 0.917127  | 1         |
| 1700055D18Rik    | 0.147823    | 0.179447  | 0            | 1         | 1         |
| Polr1e_j2        | 1.8381      | 2.50104   | 0.444307     | 0.0815938 | 0.347964  |
| Ncbp1_j1         | 1.46165     | 1.47171   | 0.00989501   | 0.945822  | 0.983787  |
| Anp32b           | 1.69293     | 1.75146   | 0.0490378    | 0.854344  | 0.953902  |
| Anp32b_j3        | 2.3544      | 2.96281   | 0.331605     | 0.259751  | 0.608472  |
| Nans_j1          | 6.85512     | 7.28766   | 0.088274     | 0.698505  | 0.888822  |
| Galnt12_j4       | 0.0846531   | 0.0595824 | -0.506678    | 0.743292  | 1         |
| Col15a1_j5       | 1.52107     | 1.53155   | 0.00990613   | 0.970617  | 0.99168   |
| Tgfbr1_j1        | 0           | 0.145325  | 1.79769e+308 | 0.0007221 | 1         |
| Tgfbr1_j3        | 2.96331     | 3.69353   | 0.317793     | 0.0279074 | 0.177093  |
| 5730528L13Rik_j1 | 0           | 0.126461  | 0            | 1         | 1         |
| E130309F12Rik_j3 | 0.0426176   | 0.142838  | 1.74485      | 0.249482  | 1         |
| XLOC_022843      | 0.380097    | 0.373489  | -0.0253013   | 0.957474  | 0.987884  |
| Rnf20_j5         | 2.36284     | 3.82998   | 0            | 1         | 1         |
| Smc2_j5          | 0           | 0.122937  | 1.79769e+308 | 0.0105215 | 1         |
| Smc2_j4          | 0.223654    | 0.335525  | 0.585151     | 0.225052  | 0.572307  |
| Fktn_j2          | 0.000115528 | 0.230507  | 0            | 1         | 1         |
| Zfp462_j3        | 0           | 0.0582999 | 0            | 1         | 1         |



|                  |             |           |              |           |           |
|------------------|-------------|-----------|--------------|-----------|-----------|
| Palm2_j2         | 3.61889     | 4.53053   | 0.324132     | 0.0079641 | 0.0722989 |
| Akap2_j6         | 4.47018     | 4.14862   | -0.107701    | 0.384829  | 0.713532  |
| Bspry_j1         | 0.00132587  | 0.0883209 | 6.05774      | 0.478208  | 1         |
| Rgs3_j4          | 9.04257     | 6.55591   | 0            | 1         | 1         |
| Zfp618_j4        | 0.0389579   | 0.0675284 | 0.793579     | 0.685044  | 1         |
| Col27a1_j16      | 0.0326993   | 0.0578534 | 0.823143     | 0.578943  | 1         |
| 6330416G13Rik_j6 | 0.196358    | 0.16908   | 0            | 1         | 1         |
| Pappa_j2         | 0           | 0.240515  | 0            | 1         | 1         |
| Tlr4_j3          | 0.034696    | 0.154773  | 2.15731      | 0.0007873 | 1         |
| Kdm4c_j1         | 0.000898116 | 0.405219  | 8.81758      | 0.201392  | 0.54481   |
| Snpc3_j1         | 2.20016     | 2.21524   | 0            | 1         | 1         |
| 4930473A06Rik_j1 | 0.0137619   | 0.0644273 | 2.227        | 0.091373  | 1         |
| XLOC_022910      | 0.12396     | 0.109071  | -0.184602    | 0.719437  | 1         |
| Cntln_j2         | 0           | 0.0886546 | 1.79769e+308 | 0.0058444 | 1         |
| Dennd4c_j2       | 0.107834    | 0.167211  | 0.632856     | 0.644888  | 0.863026  |
| Acer2            | 0.114954    | 0.115229  | 0.00344199   | 0.996105  | 1         |
| BC057079_j5      | 3.08869     | 3.27266   | 0.0834709    | 0.598431  | 0.840825  |
| XLOC_022924      | 0.0835057   | 0.347121  | 2.05549      | 0.0195857 | 0.138988  |
| BC042782_j1      | 0.10287     | 0.329967  | 0            | 1         | 1         |
| Hook1_j2         | 0.357107    | 0.45683   | 0.3553       | 0.314452  | 0.658629  |
| Inadl_j6         | 1.31458     | 1.20634   | 0            | 1         | 1         |
| Inadl_j11        | 1.38008     | 1.13948   | 0            | 1         | 1         |
| Atg4c_j1         | 1.68536     | 1.69393   | 0.00731811   | 0.97562   | 0.99292   |
| Alg6_j1          | 0.189455    | 0.213657  | 0.173438     | 0.768638  | 0.921133  |
| Dnajc6_j3        | 1.84949     | 2.59412   | 0            | 1         | 1         |
| Dnajc6_j4        | 0.378173    | 0.357125  | 0            | 1         | 1         |
| Leprot_j1        | 9.62475     | 10.7885   | 0            | 1         | 1         |
| Sgip1_j3         | 0.195766    | 0.147222  | 0            | 1         | 1         |
| Sgip1_j5         | 2.64441     | 2.27759   | 0            | 1         | 1         |
| Mier1_j1         | 0.55674     | 0.391467  | -0.508114    | 0.155584  | 0.488785  |
| Oma1_j1          | 0.374984    | 0.508889  | 0.440523     | 0.427351  | 0.741741  |
| Oma1_j2          | 0.471023    | 0.524429  | 0.154949     | 0.849024  | 0.95222   |
| 1700024P16Rik    | 0.0866139   | 0.105883  | 0.289804     | 0.728712  | 1         |
| 1700024P16Rik_j5 | 0           | 0.0596101 | 1.79769e+308 | 0.0610208 | 1         |
| Ppap2b_j2        | 0           | 0.229436  | 0            | 1         | 1         |
| Lrp8_j2          | 0.305484    | 0.246774  | -0.307904    | 0.587747  | 0.835072  |
| Lrp8             | 0.292542    | 0.0598902 | -2.28825     | 0.0319461 | 0.193716  |
| Lrp8_j5          | 0.118488    | 0.115642  | -0.0350802   | 0.966826  | 1         |
| Lrp8_j9          | 0.208875    | 0.834238  | 1.99782      | 8.31E-05  | 0.0018316 |
| O610037L13Rik_j1 | 3.64638     | 4.72652   | 0            | 1         | 1         |
| O610037L13Rik_j2 | 7.1918      | 8.66871   | 0            | 1         | 1         |
| Slc1a7_j3        | 0           | 0.168648  | 1.79769e+308 | 0.0037663 | 0.0411018 |
| 2010305A19Rik_j1 | 0.0679344   | 0.0459824 | -0.563061    | 0.539884  | 1         |
| Txndc12_j1       | 0.940123    | 0.458058  | -1.03732     | 0.0009413 | 0.0136276 |
| Calr4_j3         | 0.139816    | 0.211723  | 0.598644     | 0.459817  | 0.761657  |
| Faf1_j1          | 0.275581    | 2.59919   | 3.23751      | 1.95E-12  | 2.65E-10  |
| 4732418C07Rik_j1 | 0.606675    | 0.631246  | 0            | 1         | 1         |

|               |             |                        |            |           |           |
|---------------|-------------|------------------------|------------|-----------|-----------|
| Mobkl2c_j2    | 0.535954    | 0.604882               | 0.174545   | 0.617426  | 0.84948   |
| Ipp_j2        | 0           | 0.372799 1.79769e+308  |            | 1.03E-06  | 4.24E-05  |
| Ccdc17_j10    | 0.0403986   | 0.123592               | 1.61321    | 0.185737  | 1         |
| Ccdc17_j12    | 0           | 0.0760943 1.79769e+308 |            | 0.201838  | 1         |
| Ccdc163_j10   | 0.122023    | 0.128018               | 0.0691942  | 0.944772  | 1         |
| Ccdc163_j11   | 0.12876     | 0.487845               | 1.92173    | 0.0099565 | 0.0853736 |
| XLOC_023033   | 0           | 0.12469                | 0          | 1         | 1         |
| Ebna1bp2_j3   | 2.04754     | 2.23454                | 0          | 1         | 1         |
| Ebna1bp2_j4   | 0.657374    | 0.766104               | 0          | 1         | 1         |
| Foxj3_j3      | 1.6796      | 1.58266                | 0          | 1         | 1         |
| Hivep3_j8     | 1.96948     | 1.19804                | 0          | 1         | 1         |
| scmh1         | 2.21115     | 2.98606                | 0          | 1         | 1         |
| Col9a2_j3     | 0           | 0.169965 1.79769e+308  |            | 0.0149104 | 0.114438  |
| Col9a2_j4     | 0           | 0.17521 1.79769e+308   |            | 0.0267909 | 0.172374  |
| Ppt1_j2       | 0.506805    | 0.545601               | 0          | 1         | 1         |
| Rragd_j1      | 4.22823     | 3.99379                | -0.0822934 | 0.579783  | 0.831169  |
| Rragd_j3      | 47.9106     | 50.9915                | 0.0899119  | 0.332422  | 0.673735  |
| Fhl3_j5       | 0.137141    | 0.0961804              | -0.511845  | 0.647489  | 0.86414   |
| Fhl3_j7       | 0.142239    | 0.29032                | 1.02932    | 0.242665  | 0.590089  |
| Fhl3_j9       | 8.35E-05    | 0.193078               | 11.1751    | 0.951253  | 0.985869  |
| Sf3a3_j2      | 3.78913     | 2.99253                | 0          | 1         | 1         |
| Inpp5b_j1     | 0.0713849   | 0.228795               | 1.68036    | 0.0104093 | 0.0881074 |
| Yrdc_j1       | 1.97057     | 2.40305                | 0.286249   | 0.179975  | 0.519626  |
| AK134673_j7   | 0.268617    | 0.307611               | 0.195554   | 0.681221  | 0.880213  |
| Gnl2_j1       | 0           | 1.48044                | 0          | 1         | 1         |
| Csf3r_j2      | 0           | 0.100767 1.79769e+308  |            | 0.078362  | 1         |
| Csf3r_j3      | 0.0628814   | 0.106775               | 0.763868   | 0.427781  | 1         |
| Csf3r_j7      | 0           | 0.0650998 1.79769e+308 |            | 0.111262  | 1         |
| Stk40_j4      | 0.000157964 | 2.39796                | 0          | 1         | 1         |
| AK031234      | 0           | 0.362223               | 0          | 1         | 1         |
| XLOC_023094   | 1.00125     | 1.13873                | 0.185612   | 0.311092  | 0.655898  |
| XLOC_023094   | 0.103655    | 0.310131               | 1.58109    | 0.107065  | 0.406551  |
| XLOC_023094   | 1.11367     | 1.5494                 | 0.47638    | 0.136341  | 0.459359  |
| Csmd2_j4      | 0.157279    | 0.240336               | 0          | 1         | 1         |
| Ak2_j1        | 0.260239    | 0.459239               | 0.819407   | 0.155285  | 0.488418  |
| 2510006D16Rik | 11.4282     | 13.4452                | 0          | 1         | 1         |
| Ptp4a2_j5     | 0           | 0.127109 1.79769e+308  |            | 0.010451  | 1         |
| Col16a1_j1    | 5.31087     | 5.72444                | 0          | 1         | 1         |
| Pef1_j2       | 30.1767     | 30.2143                | 0          | 1         | 1         |
| Nkain1_j4     | 5.25202     | 10.2924                | 0.970636   | 2.01E-13  | 3.20E-11  |
| Pum1_j3       | 0.122169    | 0.315041               | 1.36666    | 0.0072232 | 0.0675013 |
| Pum1_j13      | 9.94085     | 9.15421                | -0.118935  | 0.355016  | 0.691015  |
| Laptm5_j2     | 1.32101     | 4.83926                | 0          | 1         | 1         |
| Mecr_j1       | 0.35025     | 0.742451               | 1.08391    | 0.121429  | 0.433976  |
| Fgr_j1        | 0.0669778   | 0.106376               | 0.667412   | 0.545542  | 1         |
| Ahdc1_j5      | 2.36784     | 2.68841                | 0          | 1         | 1         |
| Wasf2_j2      | 2.53612     | 3.88253                | 0          | 1         | 1         |

|                  |             |           |              |           |           |
|------------------|-------------|-----------|--------------|-----------|-----------|
| XLOC_023147      | 0.0583264   | 0.242687  | 2.05688      | 0.100242  | 0.391937  |
| Ubxn11_j11       | 0.0975977   | 0.205194  | 1.07207      | 0.288681  | 0.636345  |
| Pafah2           | 0.189603    | 0.0754986 | 0            | 1         | 1         |
| Stmn1_j8         | 0           | 0.79709   | 1.79769e+308 | 3.01E-05  | 0.0007768 |
| Stmn1_j11        | 50.3644     | 66.5646   | 0.402353     | 2.73E-05  | 0.0007145 |
| D4Wsu53e_j2      | 72.142      | 76.2703   | 0.0802823    | 0.350262  | 0.687781  |
| Gale_j4          | 21.1779     | 22.8767   | 0.111317     | 0.308037  | 0.653037  |
| Tcea3_j2         | 0.0854387   | 0.185237  | 1.11641      | 0.327918  | 0.670433  |
| Luzp1_j2         | 0.351119    | 0.538972  | 0            | 1         | 1         |
| Usp48_j1         | 4.29113     | 4.31832   | 0.00911183   | 0.943617  | 0.983025  |
| Usp48_j12        | 8.58798     | 9.46291   | 0.139966     | 0.199396  | 0.542329  |
| Rap1gap_j4       | 8.03294     | 9.83857   | 0            | 1         | 1         |
| Eif4g3_j10       | 0.0699385   | 0.0415964 | -0.74963     | 0.326183  | 1         |
| Eif4g3_j9        | 0.124902    | 0.090941  | -0.457797    | 0.401605  | 1         |
| Eif4g3_j13       | 0.0682684   | 0.186029  | 1.44624      | 0.0162035 | 0.12153   |
| Hp1bp3_j4        | 0.0362117   | 0.120669  | 1.73653      | 0.231253  | 1         |
| Sh2d5            | 1.1527      | 0.813594  | 0            | 1         | 1         |
| Kif17_j7         | 0           | 0.0619439 | 1.79769e+308 | 0.0391113 | 1         |
| Kif17_j4         | 0.162673    | 0.0947332 | -0.780031    | 0.292146  | 0.638961  |
| Mul1_j2          | 0.0544168   | 0.127891  | 1.2328       | 0.0517214 | 1         |
| Camk2n1_j3       | 7.57788     | 7.71451   | 0.0257798    | 0.938403  | 0.981171  |
| Tmco4_j6         | 0           | 0.113735  | 1.79769e+308 | 0.021436  | 1         |
| Ubr4_j5          | 0.329408    | 0.370564  | 0.169849     | 0.469888  | 0.767871  |
| Rcc2_j3          | 0           | 0.838892  | 0            | 1         | 1         |
| Fbxo42_j3        | 0.000258532 | 0.229159  | 0            | 1         | 1         |
| Arhgef19_j7      | 0           | 0.308556  | 0            | 1         | 1         |
| Epha2_j2         | 0           | 0.125937  | 1.79769e+308 | 0.0026558 | 1         |
| Zbtb17_j4        | 0           | 0.240765  | 1.79769e+308 | 0.0021043 | 0.0260117 |
| Gm13051_j1       | 0.552298    | 0.73106   | 0.404543     | 0.523976  | 0.799625  |
| Gm13152_j6       | 1.06781     | 1.41105   | 0.402124     | 0.372065  | 0.705023  |
| 2510039018Rik_j1 | 11.9447     | 13.6685   | 0.19449      | 0.129488  | 0.44845   |
| Mthfr_j5         | 0.299213    | 0.111089  | 0            | 1         | 1         |
| Mthfr_j4         | 0.468521    | 0.316243  | 0            | 1         | 1         |
| Mtor_j3          | 0.933281    | 2.04473   | 1.13153      | 0.0036866 | 0.0405333 |
| Clstn1_j1        | 4.69736     | 5.36618   | 0            | 1         | 1         |
| XLOC_023268      | 1.24461     | 0.68451   | -0.862556    | 1.20E-06  | 4.84E-05  |
| Gm13067_j4       | 0.390104    | 0.232942  | -0.743888    | 0.157158  | 0.490971  |
| Rere_j4          | 0.0849172   | 0.12452   | 0.552254     | 0.388898  | 1         |
| Rere_j9          | 0.157106    | 0.225723  | 0.522813     | 0.375108  | 0.707326  |
| mKIAA0720_j11    | 1.15645     | 1.68348   | 0            | 1         | 1         |
| Acot7_j4         | 0.29952     | 1.54122   | 2.36335      | 2.10E-05  | 0.0005771 |
| Acot7_j7         | 303.316     | 341.924   | 0.172852     | 0.0454558 | 0.244106  |
| Chd5_j4          | 0.427586    | 0.400129  | 0            | 1         | 1         |
| BC046331_j3      | 4.38004     | 5.07286   | 0            | 1         | 1         |
| Pank4_j2         | 4.59016     | 4.79737   | 0.0636994    | 0.722515  | 0.901138  |
| Pank4_j3         | 7.83904     | 8.12466   | 0.0516296    | 0.730656  | 0.904795  |
| Gnb1_j1          | 29.2366     | 26.5312   | 0            | 1         | 1         |

|                  |           |           |              |           |           |
|------------------|-----------|-----------|--------------|-----------|-----------|
| Gnb1_j2          | 44.4502   | 55.9052   | 0            | 1         | 1         |
| Gnb1_j10         | 160.281   | 173.293   | 0            | 1         | 1         |
| 2610204G22Rik    | 0.0591356 | 0.186297  | 1.65551      | 0.207705  | 0.552017  |
| XLOC_023314      | 0.169728  | 0.279062  | 0.717358     | 0.0759009 | 0.332821  |
| AK035229         | 3.79977   | 4.09626   | 0.108394     | 0.569174  | 0.825749  |
| Mxra8_j1         | 0         | 0.188323  | 0            | 1         | 1         |
| Mxra8_j6         | 0.281301  | 0.497131  | 0            | 1         | 1         |
| Acap3_j4         | 0.332929  | 0.669437  | 1.00773      | 0.003076  | 0.0351278 |
| Fam132a_j2       | 4.56949   | 4.0129    | -0.187388    | 0.448172  | 0.754733  |
| 9430015G10Rik_j3 | 1.04952   | 1.05274   | 0.00442925   | 0.986945  | 0.996237  |
| Tmem68_j4        | 2.28808   | 2.7607    | 0            | 1         | 1         |
| Rps20_j1         | 9.40259   | 13.0493   | 0.472843     | 0.0688342 | 0.314522  |
| Rps20_j3         | 2.12427   | 2.24459   | 0.0794836    | 0.59217   | 0.837692  |
| Ints8_j1         | 5.30163   | 5.8722    | 0.147466     | 0.278716  | 0.627544  |
| Fam92a_j8        | 0.420166  | 0.782784  | 0            | 1         | 1         |
| Otud6b_j7        | 1.6585    | 1.55627   | 0            | 1         | 1         |
| Necab1_j2        | 1.34972   | 3.53325   | 0            | 1         | 1         |
| Osgin2_j2        | 0.95805   | 1.09254   | 0            | 1         | 1         |
| Osgin2_j3        | 0.580207  | 0.883367  | 0            | 1         | 1         |
| Wwp1_j5          | 3.95707   | 3.56287   | -0.151391    | 0.361188  | 0.695804  |
| Nkain3_j2        | 0         | 0.0533581 | 1.79769e+308 | 0.114184  | 1         |
| Klhl32_j1        | 0.0537185 | 0.1045    | 0.960011     | 0.126789  | 1         |
| Manea_j1         | 0         | 0.490849  | 0            | 1         | 1         |
| XLOC_023381      | 0.135389  | 0.100477  | -0.430247    | 0.753202  | 1         |
| XLOC_023381      | 0.316782  | 0.332008  | 0.0677278    | 0.939337  | 0.981536  |
| XLOC_023381      | 0.151544  | 0.208924  | 0.463241     | 0.684045  | 0.881956  |
| XLOC_023381      | 0.0902898 | 0.0916174 | 0.0210601    | 0.989129  | 1         |
| Orc3_j2          | 0.618597  | 0.731046  | 0.240963     | 0.327807  | 0.670398  |
| Slc35a1_j2       | 0         | 0.0860174 | 1.79769e+308 | 0.117171  | 1         |
| Slc35a1_j3       | 0.412364  | 0.253411  | -0.702438    | 0.348272  | 0.686638  |
| 1810030N24Rik_j2 | 5.87972   | 9.01837   | 0.61712      | 0.0145733 | 0.112578  |
| Zfp292_j2        | 0.131737  | 0.331318  | 1.33056      | 9.98E-05  | 0.0021541 |
| Ddx58_j2         | 0         | 0.179867  | 1.79769e+308 | 0.0021773 | 0.0266706 |
| Aptx_j2          | 1.8179    | 1.77044   | 0            | 1         | 1         |
| B4galt1_j2       | 0.85853   | 0.548323  | 0            | 1         | 1         |
| Nol6_j1          | 5.94893   | 5.18636   | 0            | 1         | 1         |
| Smrp1_j9         | 0.130647  | 0.208743  | 0.676053     | 0.600981  | 0.841992  |
| Smrp1_j2         | 0.155716  | 0.239097  | 0.618681     | 0.431129  | 0.743472  |
| 2310028H24Rik_j2 | 2.88473   | 4.15975   | 0            | 1         | 1         |
| Cntfr_j6         | 2.46752   | 4.67784   | 0            | 1         | 1         |
| Gm13305_j1       | 0.983451  | 1.04888   | 0.0929271    | 0.766411  | 0.920335  |
| Vcp_j5           | 2.72186   | 2.71512   | -0.00357748  | 0.985714  | 0.995741  |
| Pigo_j11         | 0.591138  | 1.17085   | 0.985996     | 0.0003556 | 0.0061303 |
| Pigo_j4          | 0.615868  | 0.0629206 | -3.29102     | 1.96E-05  | 0.0005463 |
| Pigo_j12         | 0.490214  | 0.332364  | -0.56065     | 0.180794  | 0.520645  |
| Cd72             | 0.998803  | 1.83264   | 0.875652     | 0.0006283 | 0.0098511 |
| E130306D19Rik_j1 | 0.0462521 | 0.170151  | 1.87923      | 0.010029  | 0.0856946 |

|                  |             |           |              |           |           |
|------------------|-------------|-----------|--------------|-----------|-----------|
| Tln1_j3          | 9.20345     | 12.5419   | 0            | 1         | 1         |
| Rnf38_j4         | 2.0796      | 2.68018   | 0            | 1         | 1         |
| Rnf38_j5         | 1.43788     | 2.13058   | 0            | 1         | 1         |
| Mcart1_j2        | 0.04134     | 1.18991   | 0            | 1         | 1         |
| Trim14_j6        | 0.494828    | 0.612036  | 0.30669      | 0.565865  | 0.824141  |
| Trim14_j7        | 0.560392    | 1.01158   | 0.852096     | 0.147986  | 0.4767    |
| Coro2a_j2        | 0           | 2.12053   | 0            | 1         | 1         |
| Tbc1d2_j4        | 0           | 0.0697263 | 1.79769e+308 | 0.0259564 | 1         |
| Anks6_j7         | 1.167       | 1.41593   | 0.278946     | 0.23056   | 0.577519  |
| 2810432L12Rik_j1 | 4.11956     | 4.87213   | 0            | 1         | 1         |
| 2810432L12Rik    | 9.91065     | 8.42176   | 0            | 1         | 1         |
| AK141187_j5      | 0.0814484   | 0.260906  | 1.67957      | 0.034547  | 0.204029  |
| Klf4_j1          | 0.127028    | 0.219074  | 0.786276     | 0.257681  | 0.60645   |
| D730040F13Rik_j6 | 0.327401    | 0.372428  | 0            | 1         | 1         |
| Epb4.1l4b_j1     | 1.92469     | 2.01065   | 0.0630398    | 0.746642  | 0.911752  |
| Epb4.1l4b_j2     | 1.20708     | 1.77899   | 0.559538     | 0.0099985 | 0.0855854 |
| Epb4.1l4b_j2     | 1.09953     | 0.611467  | -0.846542    | 0.0012322 | 0.0168948 |
| Epb4.1l4b_j3     | 0           | 0.195891  | 1.79769e+308 | 6.56E-05  | 0.0015038 |
| Ptpn3_j7         | 5.23721     | 5.56813   | 0            | 1         | 1         |
| Svep1_j1         | 0           | 0.293662  | 1.79769e+308 | 0.031423  | 0.191514  |
| Svep1_j2         | 0           | 0.0729062 | 1.79769e+308 | 0.0225299 | 1         |
| Susd1_j11        | 0.06585     | 0.228155  | 1.79276      | 0.0205978 | 0.143839  |
| 1110054O05Rik    | 0.775143    | 0.997059  | 0.363216     | 0.224408  | 0.571535  |
| Fkbp15_j3        | 0.113158    | 0         | 0            | 1         | 1         |
| Wdr31_j5         | 0           | 0.0895052 | 1.79769e+308 | 0.0283157 | 1         |
| Akna_j2          | 0           | 0.104883  | 1.79769e+308 | 0.0015978 | 1         |
| Akna_j3          | 0.000585067 | 0.0627295 | 6.7444       | 0.26665   | 1         |
| Akna_j4          | 0.118327    | 0.106033  | -0.158263    | 0.797217  | 1         |
| Whrn_j2          | 0.154861    | 0.10816   | 0            | 1         | 1         |
| Tnc_j3           | 0.742745    | 0.915084  | 0.301037     | 0.328334  | 0.670862  |
| XLOC_023520      | 0.0233617   | 0.0849671 | 1.86276      | 0.32497   | 1         |
| XLOC_023520      | 0.0445896   | 0.139512  | 1.64561      | 0.124801  | 1         |
| Cdk5rap2_j2      | 0.817749    | 0.872289  | 0.0931481    | 0.695945  | 0.887907  |
| Cdk5rap2_j3      | 0.189101    | 0.126848  | -0.576053    | 0.220657  | 0.567463  |
| Tle1_j5          | 0.130683    | 0.250223  | 0            | 1         | 1         |
| Tle1             | 0.719507    | 0.849711  | 0            | 1         | 1         |
| Tle1_j6          | 1.0984      | 1.24508   | 0            | 1         | 1         |
| Tle1_j11         | 11.3159     | 11.5257   | 0            | 1         | 1         |
| Gm11488          | 4.80137     | 4.49159   | -0.0962184   | 0.634227  | 0.858133  |
| Rasef_j1         | 0           | 0.0712841 | 1.79769e+308 | 0.0095025 | 1         |
| Ptprd_j10        | 0.607281    | 0.295419  | -1.0396      | 0.0006821 | 0.0105083 |
| Mpdz_j11         | 1.92407     | 1.31987   | -0.543763    | 0.0368161 | 0.212234  |
| Mpdz             | 2.20581     | 1.91885   | -0.201067    | 0.191281  | 0.533463  |
| Nfib_j2          | 0.000217205 | 0.395247  | 0            | 1         | 1         |
| Nfib_j3          | 0.276666    | 0.53625   | 0            | 1         | 1         |
| Zdhhc21_j3       | 0           | 0.291928  | 0            | 1         | 1         |
| Zdhhc21_j4       | 5.22484     | 5.72646   | 0            | 1         | 1         |

|                  |            |           |              |           |           |
|------------------|------------|-----------|--------------|-----------|-----------|
| Frem1_j9         | 0.0188454  | 0.0751773 | 1.99609      | 0.383894  | 1         |
| Ttc39b_j1        | 0.698126   | 0.387093  | 0            | 1         | 1         |
| Gm11413_j1       | 0.0292723  | 0.205496  | 2.8115       | 0.27196   | 0.620776  |
| Psip1_j1         | 1.40043    | 1.27696   | 0            | 1         | 1         |
| XLOC_023541      | 0.408039   | 0.328512  | -0.312761    | 0.484525  | 0.776403  |
| Haus6_j3         | 0.805501   | 0.691083  | -0.221028    | 0.383343  | 0.713002  |
| Haus6            | 1.74028    | 1.72725   | -0.0108361   | 0.946664  | 0.984253  |
| Plin2_j1         | 0.382275   | 0.477923  | 0            | 1         | 1         |
| Ptplad2          | 0.404949   | 0.39898   | -0.0214246   | 0.966205  | 0.990343  |
| Elavl2_j5        | 1.31939    | 1.30866   | 0            | 1         | 1         |
| Gm12666_j1       | 0.949158   | 1.10067   | 0.213665     | 0.735674  | 0.906939  |
| 4930579C15Rik_j3 | 0          | 0.0823717 | 1.79769e+308 | 0.0889764 | 1         |
| 4930579C15Rik_j4 | 0.0261896  | 0.104342  | 1.99426      | 0.217404  | 1         |
| Dock7_j2         | 2.35387    | 2.86271   | 0.282346     | 0.0532202 | 0.268469  |
| Dock7_j12        | 1.07086    | 0.764536  | -0.486115    | 0.0397011 | 0.222777  |
| Insl5_j1         | 0          | 0.0535189 | 1.79769e+308 | 0.169135  | 1         |
| Insl5            | 0.0891993  | 0.14165   | 0.667225     | 0.531713  | 1         |
| Wdr78_j1         | 0.0867051  | 0.0990251 | 0.191679     | 0.793947  | 1         |
| Pcsk9_j1         | 0.0474324  | 0.147993  | 1.64159      | 0.0621479 | 1         |
| Ttc4_j5          | 0.0602552  | 0.118036  | 0            | 1         | 1         |
| Gm1027_j8        | 0.240742   | 0.119763  | -1.00731     | 0.241913  | 0.589174  |
| Gm1027_j9        | 0          | 0.0548597 | 1.79769e+308 | 0.0635548 | 1         |
| Gm1027_j10       | 0          | 0.0498832 | 1.79769e+308 | 0.0809815 | 1         |
| Zfyve9_j6        | 3.55972    | 4.06777   | 0            | 1         | 1         |
| 1520402A15Rik_j1 | 0          | 0.0521004 | 1.79769e+308 | 0.0225955 | 1         |
| Mast2_j4         | 0.677811   | 1.13831   | 0.747945     | 0.0376496 | 0.215332  |
| Nasp_j1          | 0          | 0.465422  | 1.79769e+308 | 0.000849  | 0.0125479 |
| Toe1_j3          | 0.00146785 | 0.0511099 | 0            | 1         | 1         |
| Toe1_j4          | 0.0922467  | 0.129128  | 0            | 1         | 1         |
| Toe1_j5          | 1.75999    | 1.72283   | 0            | 1         | 1         |
| Btbd19_j6        | 0          | 0.199424  | 1.79769e+308 | 0.0048075 | 0.0492359 |
| Rps8_j4          | 0          | 0.0995345 | 1.79769e+308 | 0.0901524 | 1         |
| Rps8_j10         | 0.0845179  | 0.164161  | 0.957784     | 0.362332  | 0.696685  |
| Dph2_j2          | 0.0589876  | 0.0894528 | 0.600715     | 0.477712  | 1         |
| Ipo13_j1         | 2.80506    | 2.38963   | 0            | 1         | 1         |
| Ipo13_j10        | 4.88516    | 3.36758   | 0            | 1         | 1         |
| St3gal3_j2       | 1.77358    | 2.58424   | 0            | 1         | 1         |
| Szt2_j2          | 0.26766    | 0.382191  | 0            | 1         | 1         |
| Szt2_j3          | 0.0853966  | 0.164099  | 0            | 1         | 1         |
| Wdr65_j3         | 0.096853   | 0.142169  | 0.553742     | 0.535196  | 1         |
| Ybx1_j2          | 1.48168    | 1.7273    | 0.221286     | 0.411323  | 0.730655  |
| Ppih_j2          | 0          | 0.229885  | 1.79769e+308 | 0.0468538 | 0.248302  |
| AA415398         | 0.280165   | 0.416247  | 0            | 1         | 1         |
| Kcnq4_j3         | 2.1988     | 2.81106   | 0            | 1         | 1         |
| Nfyc_j6          | 0.0788392  | 0.056037  | -0.492535    | 0.65563   | 1         |
| Nfyc_j7          | 0.0596883  | 0.135716  | 1.18507      | 0.184669  | 1         |
| Nfyc_j9          | 0.159596   | 0.257922  | 0.692505     | 0.587375  | 0.835002  |

|               |            |           |              |           |           |
|---------------|------------|-----------|--------------|-----------|-----------|
| Smap2_j4      | 12.9254    | 11.1909   | 0            | 1         | 1         |
| Mfsd2a_j3     | 3.72751    | 4.94712   | 0            | 1         | 1         |
| Bmp8a_j1      | 0.0796169  | 0.172838  | 1.11828      | 0.118305  | 0.42821   |
| Macf1_j10     | 0.341836   | 0.566958  | 0.729939     | 0.00715   | 0.0669529 |
| Thrap3_j6     | 0.509092   | 0.52067   | 0.0324417    | 0.898628  | 0.967622  |
| Thrap3_j7     | 0          | 0.123337  | 1.79769e+308 | 0.0005974 | 1         |
| Thrap3_j8     | 0.197107   | 0.170548  | -0.208801    | 0.649858  | 0.865521  |
| Mtap7d1_j4    | 26.2321    | 45.2021   | 0            | 1         | 1         |
| Eif2c3_j4     | 0.304351   | 0.443107  | 0.541919     | 0.0707644 | 0.319729  |
| XLOC_023729   | 1.83E-05   | 0.205387  | 13.4552      | 0.987908  | 0.996414  |
| Zscan20_j1    | 0.0337729  | 0.0639952 | 0.922098     | 0.336254  | 1         |
| Adc_j5        | 1.61081    | 2.42861   | 0            | 1         | 1         |
| Adc_j10       | 1.18735    | 2.59166   | 0            | 1         | 1         |
| Adc_j9        | 8.10065    | 13.608    | 0            | 1         | 1         |
| C77080_j5     | 0.074798   | 0.121623  | 0            | 1         | 1         |
| Hdac1_j2      | 0.439887   | 0.624571  | 0.505733     | 0.423707  | 0.739059  |
| Hdac1_j7      | 0.2946     | 0.297213  | 0.0127382    | 0.979242  | 0.993972  |
| Hdac1_j12     | 0.953265   | 1.2809    | 0.426211     | 0.376533  | 0.708503  |
| Eif3i_j3      | 0.326252   | 0.774028  | 0            | 1         | 1         |
| Txlna_j5      | 3.55535    | 4.30886   | 0            | 1         | 1         |
| Txlna_j7      | 3.36538    | 2.43759   | 0            | 1         | 1         |
| Kpna6_j5      | 0          | 0.44279   | 0            | 1         | 1         |
| Serinc2_j2    | 2.43558    | 2.78448   | 0            | 1         | 1         |
| Zcchc17_j1    | 14.1904    | 14.9455   | 0            | 1         | 1         |
| Ptpru_j3      | 0.258062   | 0.266132  | 0.0444232    | 0.933107  | 0.979673  |
| Ptpru_j4      | 0.00140492 | 0.106659  | 6.24637      | 0.3047    | 1         |
| Epb4.1_j11    | 0          | 0.123755  | 1.79769e+308 | 4.42E-06  | 1         |
| Epb4.1_j13    | 0.886318   | 0.807285  | -0.134746    | 0.43932   | 0.748911  |
| Trnau1ap_j1   | 0          | 0.0956533 | 1.79769e+308 | 0.102195  | 1         |
| Atpif1_j5     | 46.1181    | 54.7977   | 0            | 1         | 1         |
| Stx12_j1      | 2.97748    | 1.80214   | 0            | 1         | 1         |
| Fam76a_j2     | 1.59836    | 1.84916   | 0            | 1         | 1         |
| Gpr3_j3       | 2.15581    | 2.02349   | -0.0913812   | 0.665143  | 0.873092  |
| Wdtdc1_j2     | 6.27191    | 4.9624    | 0            | 1         | 1         |
| Arid1a_j3     | 0.372689   | 0.563211  | 0            | 1         | 1         |
| Rps6ka1_j2    | 0.645183   | 0.951967  | 0            | 1         | 1         |
| Dhdds_j1      | 0.331323   | 0.231289  | 0            | 1         | 1         |
| Dhdds_j2      | 0          | 0.529586  | 0            | 1         | 1         |
| Gm7534_j2     | 0          | 0.138258  | 1.79769e+308 | 0.0045891 | 1         |
| Extl1_j2      | 0          | 0.153679  | 1.79769e+308 | 0.0091735 | 1         |
| Tmem50a_j3    | 38.5073    | 46.8249   | 0            | 1         | 1         |
| A330049M08Rik | 0.395006   | 1.21058   | 0            | 1         | 1         |
| Grhl3_j3      | 0          | 0.322951  | 1.79769e+308 | 0.0002469 | 0.004572  |
| Zbtb40_j5     | 0          | 0.0974203 | 1.79769e+308 | 0.0071404 | 1         |
| Cdc42_j8      | 0.619213   | 0.371157  | 0            | 1         | 1         |
| Pqlc2_j1      | 1.33108    | 1.58804   | 0            | 1         | 1         |
| Arhgef10l_j5  | 1.36338    | 1.17433   | 0            | 1         | 1         |

|                  |            |           |              |           |           |
|------------------|------------|-----------|--------------|-----------|-----------|
| Crocc_j11        | 0.398055   | 0.542815  | 0.447492     | 0.25908   | 0.607838  |
| Crocc            | 0.2487     | 0.596884  | 1.26305      | 0.0120265 | 0.0983906 |
| Crocc_j13        | 0          | 0.257832  | 1.79769e+308 | 7.85E-06  | 0.0002511 |
| Crocc_j16        | 0.0222377  | 0.0975519 | 2.13316      | 0.188069  | 1         |
| Crocc_j18        | 0.158053   | 0.154634  | -0.0315466   | 0.965088  | 0.990054  |
| Spen_j3          | 0.290847   | 0.502989  | 0            | 1         | 1         |
| Spen_j2          | 0.549856   | 0.144318  | 0            | 1         | 1         |
| Slc25a34         | 0.242722   | 0.188727  | -0.363003    | 0.461371  | 0.762598  |
| Efh2_j1          | 14.2654    | 18.154    | 0            | 1         | 1         |
| AK018156_j7      | 0          | 0.108949  | 1.79769e+308 | 0.110608  | 1         |
| Prdm2_j4         | 0.41947    | 1.0966    | 0            | 1         | 1         |
| 2610305D13Rik_j3 | 0          | 0.693169  | 0            | 1         | 1         |
| Gm13157_j4       | 0.134947   | 0.334223  | 0            | 1         | 1         |
| Miip_j1          | 0.27507    | 0.443761  | 0            | 1         | 1         |
| Mfn2_j2          | 36.8602    | 40.9601   | 0            | 1         | 1         |
| Mfn2             | 4.5688     | 2.91914   | 0            | 1         | 1         |
| Plod1_j1         | 4.01347    | 5.30458   | 0.402387     | 0.0183438 | 0.132805  |
| Clcn6_j5         | 0.41988    | 0.791262  | 0.914178     | 0.0100564 | 0.0858816 |
| 2610109H07Rik_j1 | 0          | 0.225404  | 1.79769e+308 | 3.99E-05  | 0.0009853 |
| Tardbp_j3        | 2.96293    | 0         | 0            | 1         | 1         |
| Tardbp_j2        | 0.0520605  | 0.0683043 | 0            | 1         | 1         |
| Kif1b_j1         | 2.70991    | 1.97914   | 0            | 1         | 1         |
| Ube4b_j4         | 4.38432    | 7.27362   | 0            | 1         | 1         |
| Pik3cd_j2        | 0.541433   | 0.592779  | 0.130711     | 0.685255  | 0.88254   |
| Slc25a33_j1      | 9.24276    | 10.195    | 0.14147      | 0.410392  | 0.730298  |
| Gm13073_j2       | 0.13935    | 0.20976   | 0.590024     | 0.510157  | 0.790971  |
| Spsb1_j4         | 1.52682    | 1.39688   | 0            | 1         | 1         |
| Per3_j1          | 0.149716   | 0.218277  | 0.543926     | 0.281256  | 0.629634  |
| Per3             | 0.00628354 | 0.250151  | 5.31507      | 0.0008081 | 0.0120685 |
| Phf13_j1         | 0.39538    | 0.535202  | 0            | 1         | 1         |
| Zbtb48_j2        | 0.335293   | 0.644779  | 0.943382     | 0.0279055 | 0.177093  |
| Zbtb48           | 1.88856    | 1.4812    | -0.350521    | 0.140889  | 0.466872  |
| Kcnab2_j6        | 10.5698    | 7.00001   | 0            | 1         | 1         |
| Kcnab2           | 0.0657458  | 0.143501  | 0            | 1         | 1         |
| Dffb_j4          | 0.0365024  | 0.218153  | 2.57928      | 0.0286961 | 0.180302  |
| Dffb_j6          | 0.249286   | 0.49727   | 0.996225     | 0.0533355 | 0.268749  |
| Prdm16_j1        | 0.0565253  | 0.19804   | 1.80882      | 0.0042036 | 0.0444529 |
| Prdm16_j2        | 0.204202   | 0.309107  | 0.59811      | 0.0930102 | 0.375159  |
| Prkcz_j5         | 10.1434    | 11.2157   | 0            | 1         | 1         |
| Prkcz_j4         | 7.76528    | 5.55469   | 0            | 1         | 1         |
| Gabrd_j2         | 0.0655486  | 0.147249  | 1.16762      | 0.225248  | 1         |
| Mib2_j3          | 0.661155   | 0.662753  | 0.00348203   | 0.988903  | 0.996607  |
| Atad3a_j2        | 0.160682   | 0.995283  | 0            | 1         | 1         |
| Atad3a_j11       | 0.856154   | 0.644351  | 0            | 1         | 1         |
| Gltpd1_j1        | 0          | 0.12553   | 1.79769e+308 | 0.057167  | 1         |
| Agrn_j19         | 0.849445   | 0.725643  | 0            | 1         | 1         |
| Plekhn1_j6       | 0.0912491  | 0.067706  | 0            | 1         | 1         |



|                  |           |           |               |           |           |
|------------------|-----------|-----------|---------------|-----------|-----------|
| Plekhn1_j7       | 0.12407   | 0.232961  | 0             | 1         | 1         |
| Plekhn1_j10      | 0.575972  | 0.398752  | 0             | 1         | 1         |
| Al838599_j5      | 0.0384831 | 0.0741046 | 0.94534       | 0.557307  | 1         |
| Al838599_j6      | 0.074273  | 0.0499977 | -0.570977     | 0.71296   | 1         |
| Chchd7_j2        | 0.780295  | 0.312538  | 0             | 1         | 1         |
| Fam110b_j1       | 0.0112534 | 0.406853  | 0             | 1         | 1         |
| Sdcbp_j3         | 188.311   | 191.979   | 0             | 1         | 1         |
| Chd7_j4          | 0.030223  | 0.110411  | 1.86917       | 0.200554  | 1         |
| Chd7_j7          | 0         | 0.171942  | 1.79769e+308  | 0.0001022 | 0.0021979 |
| 2610301B20Rik_j3 | 3.05684   | 4.83313   | 0             | 1         | 1         |
| 1110037F02Rik    | 0.846876  | 0.782257  | -0.114507     | 0.668476  | 0.874474  |
| XLOC_022711      | 0.102861  | 0.144486  | 0             | 1         | 1         |
| Rbm12b_j2        | 2.13233   | 2.30115   | 0             | 1         | 1         |
| Tmem55a_j2       | 0.0986785 | 0.0214091 | -2.20451      | 0.541881  | 1         |
| AK005641_j1      | 2.02687   | 1.94474   | 0             | 1         | 1         |
| Ttpa_j1          | 0.100609  | 0.254791  | 1.34055       | 0.266416  | 0.615515  |
| Ccnc             | 0.973007  | 0.980715  | 0             | 1         | 1         |
| Ccnc_j4          | 0.900627  | 0.76387   | 0             | 1         | 1         |
| Usp45_j1         | 0.402788  | 0.572066  | 0             | 1         | 1         |
| 6230409E13Rik_j3 | 1.27569   | 1.80279   | 0             | 1         | 1         |
| Fbxl4_j3         | 0.0254674 | 0.0849298 | 0             | 1         | 1         |
| Fbxl4_j4         | 3.63008   | 4.33092   | 0             | 1         | 1         |
| Mms22l_j7        | 7.72E-05  | 0.0829171 | 10.0695       | 0.94649   | 1         |
| Mms22l_j6        | 0         | 0.110176  | 1.79769e+308  | 0.0380042 | 1         |
| Rngtt_j1         | 1.32811   | 1.08452   | -0.292312     | 0.333595  | 0.67451   |
| Cnr1_j4          | 0.891551  | 0         | -1.79769e+308 | 8.45E-23  | 2.56E-20  |
| XLOC_022761      | 0.148603  | 0.0833823 | 0             | 1         | 1         |
| Aco1_j2          | 2.90107   | 3.98997   | 0.459797      | 0.024856  | 0.163566  |
| Dnaja1_j1        | 15.8786   | 14.9121   | 0             | 1         | 1         |
| Nfx1_j1          | 3.32231   | 3.98088   | 0             | 1         | 1         |
| Nfx1_j2          | 2.7651    | 2.97504   | 0             | 1         | 1         |
| N28178_j11       | 0.520739  | 0.504657  | 0             | 1         | 1         |
| N28178_j14       | 0         | 0.212655  | 0             | 1         | 1         |
| Ccdc107_j2       | 0.992045  | 1.15379   | 0.217899      | 0.675351  | 0.877609  |
| Ccdc107_j1       | 0.567447  | 0.490339  | -0.210707     | 0.794258  | 0.931391  |
| Ccdc107_j3       | 0.0498069 | 0.192466  | 1.95019       | 0.321375  | 0.664445  |
| Npr2_j5          | 3.44254   | 8.08544   | 0             | 1         | 1         |
| XLOC_022806      | 0         | 0.15408   | 1.79769e+308  | 0.0538673 | 1         |
| Polr1e_j1        | 1.28236   | 1.41647   | 0.143501      | 0.671398  | 0.875764  |
| Wdr32_j1         | 0         | 0.807435  | 0             | 1         | 1         |
| Tdrd7_j1         | 0.232969  | 0.691096  | 1.56875       | 0.0010452 | 0.014793  |
| Anp32b_j4        | 2.25711   | 3.23612   | 0.519788      | 0.11896   | 0.429139  |
| Nans_j3          | 0         | 0.0725301 | 1.79769e+308  | 0.209522  | 1         |
| XLOC_022825      | 0.20521   | 0.192641  | 0             | 1         | 1         |
| Galnt12_j5       | 0         | 0.0519593 | 1.79769e+308  | 0.12933   | 1         |
| XLOC_022832      | 0.0568937 | 0.0726813 | 0.353317      | 0.737829  | 1         |
| Tmeff1_j1        | 1.6953    | 1.74324   | 0             | 1         | 1         |

|                  |             |                        |           |           |           |
|------------------|-------------|------------------------|-----------|-----------|-----------|
| E130309F12Rik_j4 | 0.218166    | 0.366621               | 0.748863  | 0.373035  | 0.705886  |
| Smc2_j3          | 0           | 0.17179 1.79769e+308   |           | 0.0019272 | 0.0242662 |
| Zfp462_j5        | 0.0633906   | 0.129025               | 0         | 1         | 1         |
| XLOC_022856      | 0.082324    | 0.0852076              | 0.04967   | 0.968741  | 1         |
| Ugcg_j1          | 14.3985     | 15.3042                | 0         | 1         | 1         |
| XLOC_022870      | 0.0239596   | 0.105553               | 2.13929   | 0.23891   | 1         |
| Rgs3_j3          | 0.356949    | 0.316472               | 0         | 1         | 1         |
| Col27a1_j1       | 0.350057    | 0.277135               | -0.336999 | 0.349478  | 0.687145  |
| 6330416G13Rik_j5 | 0.0944017   | 0.182574               | 0         | 1         | 1         |
| Pappa_j5         | 0.667563    | 0.921518               | 0         | 1         | 1         |
| AK042990_j1      | 0.262501    | 0.606881               | 0         | 1         | 1         |
| Frmd3_j2         | 4.72303     | 6.17011                | 0         | 1         | 1         |
| Kdm4c_j2         | 1.05514     | 1.30815                | 0.310087  | 0.473659  | 0.7701    |
| 4930473A06Rik_j3 | 0.0296119   | 0.0643092              | 1.11885   | 0.291989  | 1         |
| 4930473A06Rik_j5 | 0.0226707   | 0.0579487              | 1.35395   | 0.179277  | 1         |
| XLOC_022910      | 0.0736176   | 0.141588               | 0.94358   | 0.282267  | 1         |
| Cntln_j4         | 0           | 0.43186 1.79769e+308   |           | 7.14E-08  | 4.04E-06  |
| Sh3gl2_j4        | 5.52428     | 10.1448                | 0         | 1         | 1         |
| Dennd4c_j1       | 0           | 0.0992228 1.79769e+308 |           | 0.115639  | 1         |
| BC057079_j2      | 0.512311    | 0.215732               | -1.24778  | 0.0018713 | 0.0236912 |
| Tek_j1           | 0.484629    | 0.380798               | -0.347852 | 0.307422  | 0.652426  |
| BC042782_j2      | 0.341827    | 0.37976                | 0         | 1         | 1         |
| AK076859_j1      | 0.184916    | 0.500713               | 0         | 1         | 1         |
| Nfia             | 0.244703    | 0.121303               | -1.01242  | 0.156658  | 0.490184  |
| Inadl_j10        | 3.61944     | 4.0784                 | 0         | 1         | 1         |
| Atg4c_j2         | 0           | 0.0689796 1.79769e+308 |           | 0.114544  | 1         |
| Atg4c_j3         | 0.939414    | 0.26377                | -1.83248  | 0.0091403 | 0.0801654 |
| Alg6_j3          | 0.317164    | 0.490909               | 0.630227  | 0.173162  | 0.510747  |
| Efcab7_j1        | 0           | 0.067687 1.79769e+308  |           | 0.111013  | 1         |
| AK002929_j3      | 0           | 0.0681406 1.79769e+308 |           | 0.0766509 | 1         |
| AK002929_j4      | 0           | 0.0508006 1.79769e+308 |           | 0.158996  | 1         |
| Lepr_j3          | 0.112428    | 0.2555                 | 1.18432   | 0.0220983 | 0.150943  |
| Sgip1_j8         | 0.529684    | 1.24264                | 0         | 1         | 1         |
| Tctex1d1_j6      | 0.0430079   | 0.0612088              | 0.509136  | 0.736542  | 1         |
| Dab1_j2          | 0           | 0.0612727 1.79769e+308 |           | 0.122015  | 1         |
| Dab1_j9          | 0.256676    | 0.0935709              | -1.45582  | 0.0224374 | 0.15274   |
| 1700024P16Rik_j6 | 0           | 0.24774 1.79769e+308   |           | 0.0051269 | 0.0516926 |
| Usp24_j2         | 0.36796     | 0.468319               | 0.347941  | 0.187118  | 0.528052  |
| Usp24_j4         | 0           | 0.108494 1.79769e+308  |           | 0.0004207 | 1         |
| Ttc22_j3         | 1.65E-05    | 0.198295               | 13.5506   | 0.983262  | 0.995013  |
| XLOC_022974      | 0.137478    | 0.193507               | 0.493188  | 0.407718  | 0.728185  |
| Tmem48_j2        | 0.135793    | 0.0513908              | 0         | 1         | 1         |
| Tmem48_j3        | 3.56041     | 3.36864                | 0         | 1         | 1         |
| Glis1_j5         | 0.000153118 | 0.201828               | 10.3643   | 0.935844  | 0.98034   |
| 0610037L13Rik_j4 | 1.21045     | 1.31162                | 0         | 1         | 1         |
| 0610037L13Rik_j5 | 0.20416     | 0.455856               | 0         | 1         | 1         |
| Zcchc11_j8       | 0.0298917   | 0.107398               | 1.84514   | 0.0427655 | 1         |

|                  |             |           |              |           |          |
|------------------|-------------|-----------|--------------|-----------|----------|
| Cc2d1b_j3        | 10.9447     | 12.3823   | 0.178051     | 0.120603  | 0.432541 |
| Nrd1_j3          | 6.41006     | 4.76404   | 0            | 1         | 1        |
| Calr4_j4         | 0           | 0.0726508 | 1.79769e+308 | 0.118244  | 1        |
| Faf1_j2          | 5.04358     | 2.72673   | -0.887275    | 5.37E-05  | 0.001268 |
| Bend5_j3         | 1.18562     | 1.78906   | 0.593562     | 0.0568864 | 0.279296 |
| 9130206I24Rik_j3 | 0.0130973   | 0.47541   | 5.18183      | 0.0634608 | 0.298841 |
| Stil_j2          | 0           | 0.0474108 | 1.79769e+308 | 0.120615  | 1        |
| XLOC_023009      | 0.0312599   | 0.149993  | 2.26251      | 0.31785   | 1        |
| Tesk2_j1         | 0.829053    | 0.54395   | 0            | 1         | 1        |
| Hectd3_j3        | 5.05699     | 5.22577   | 0.047364     | 0.805037  | 0.935568 |
| Ptch2_j3         | 0           | 0.108034  | 1.79769e+308 | 0.0365104 | 1        |
| Hyi_j1           | 4.80464     | 6.24955   | 0.379324     | 0.200726  | 0.544177 |
| Ebna1bp2_j1      | 6.90464     | 7.86202   | 0            | 1         | 1        |
| Hivep3_j4        | 1.16022     | 1.56245   | 0            | 1         | 1        |
| Scmh1_j4         | 0           | 1.37556   | 0            | 1         | 1        |
| Ppt1_j1          | 19.7643     | 15.4745   | 0            | 1         | 1        |
| Trit1_j6         | 0.0320407   | 0.0832328 | 1.37725      | 0.364538  | 1        |
| Fhl3             | 0.114372    | 0.210288  | 0.878635     | 0.344158  | 0.683976 |
| Sf3a3_j1         | 1.83171     | 2.86202   | 0            | 1         | 1        |
| Sf3a3_j3         | 0.0185915   | 0.056288  | 0            | 1         | 1        |
| AK134673_j2      | 0.0176446   | 0.0783198 | 2.15015      | 0.0952656 | 1        |
| AK134673_j6      | 0.0862254   | 0.0407215 | -1.08232     | 0.355334  | 1        |
| Csf3r_j1         | 0.0560378   | 0.152207  | 1.44156      | 0.127709  | 1        |
| Csf3r_j5         | 0.153026    | 0.262788  | 0.780127     | 0.185439  | 0.525792 |
| Stk40_j1         | 0.221789    | 0.227351  | 0            | 1         | 1        |
| AU040320_j1      | 4.99206     | 4.43016   | 0            | 1         | 1        |
| Zmym6_j11        | 0.430818    | 0.75327   | 0.806087     | 0.02515   | 0.164961 |
| Dlgap3_j2        | 0           | 0.0601133 | 1.79769e+308 | 0.0634372 | 1        |
| Phc2_j3          | 18.3115     | 20.8807   | 0            | 1         | 1        |
| XLOC_023107      | 0.0596585   | 0.134682  | 1.17476      | 0.261843  | 1        |
| 2510006D16Rik_j1 | 0.338724    | 0.523426  | 0            | 1         | 1        |
| Bai2_j11         | 0           | 0.071204  | 1.79769e+308 | 0.0195162 | 1        |
| Pef1_j1          | 13.2622     | 13.5687   | 0            | 1         | 1        |
| Nkain1_j1        | 0.370598    | 0.220204  | -0.751019    | 0.462979  | 0.763417 |
| Nkain1_j3        | 2.45706     | 4.33483   | 0.81904      | 0.0138819 | 0.108789 |
| Pum1_j5          | 0           | 0.0609837 | 1.79769e+308 | 0.0526732 | 1        |
| Sdc3_j3          | 24.7516     | 29.4189   | 0            | 1         | 1        |
| XLOC_023127      | 0.0175365   | 0.156181  | 3.15479      | 0.12757   | 1        |
| Srsf4_j2         | 0.539816    | 1.00089   | 0.890738     | 0.009347  | 0.081531 |
| Taf12_j1         | 3.24926     | 3.76153   | 0.211208     | 0.520617  | 0.797932 |
| Dnajc8_j1        | 27.8821     | 27.6166   | 0            | 1         | 1        |
| Fgr_j2           | 0.0405055   | 0.0908723 | 1.16572      | 0.47439   | 1        |
| Ahdc1_j1         | 0.408915    | 0.426592  | 0            | 1         | 1        |
| Wasf2_j1         | 0.000164376 | 0.470048  | 0            | 1         | 1        |
| Pafah2_j2        | 0.0243181   | 0.0945176 | 0            | 1         | 1        |
| Pafah2_j1        | 0           | 0.15017   | 0            | 1         | 1        |
| Stmn1_j2         | 166.354     | 239.73    | 0.527154     | 1.62E-07  | 8.18E-06 |

|                  |            |           |              |           |           |
|------------------|------------|-----------|--------------|-----------|-----------|
| XLOC_023155      | 0.0367753  | 0.115361  | 0            | 1         | 1         |
| Myom3            | 0.149469   | 0.206362  | 0.465332     | 0.457072  | 0.760257  |
| nssr_1           | 1.39993    | 2.21568   | 0.662396     | 0.0630362 | 0.297471  |
| Gale_j1          | 0.0406228  | 0.0830048 | 1.0309       | 0.314331  | 1         |
| Zfp46_j2         | 0.263084   | 0.472794  | 0            | 1         | 1         |
| Hspg2_j4         | 0.297816   | 0.236114  | -0.33494     | 0.289445  | 0.63691   |
| Hspg2_j12        | 11.3062    | 13.8582   | 0.29362      | 0.0131609 | 0.104928  |
| Usp48_j9         | 0          | 0.116685  | 1.79769e+308 | 0.0092375 | 1         |
| Rap1gap          | 0.386413   | 0.233192  | 0            | 1         | 1         |
| Eif4g3_j19       | 8.95579    | 11.4866   | 0.35906      | 0.105183  | 0.402659  |
| Kif17_j3         | 0.00170058 | 0.0857043 | 0            | 1         | 1         |
| Sh2d5_j2         | 0          | 0.365481  | 0            | 1         | 1         |
| Tmco4_j3         | 0.0274052  | 0.0948534 | 1.79125      | 0.114306  | 1         |
| Tmco4_j2         | 0          | 0.0537757 | 1.79769e+308 | 0.053914  | 1         |
| Ubr4_j12         | 4.87154    | 3.92302   | -0.312412    | 0.0097385 | 0.0839896 |
| Rcc2_j1          | 0          | 0.904325  | 1.79769e+308 | 0.0514589 | 0.26301   |
| Fam131c_j1       | 0.174807   | 0.906921  | 2.37522      | 0.0013377 | 0.0180569 |
| XLOC_023236      | 0.0120417  | 0.235564  | 4.29001      | 0.137952  | 0.461744  |
| Mad2l2           | 0.523211   | 1.63974   | 0            | 1         | 1         |
| Mad2l2_j5        | 1.24372    | 1.60801   | 0            | 1         | 1         |
| Fbxo2_j1         | 2.5176     | 9.48585   | 0            | 1         | 1         |
| Exosc10          | 0.83035    | 0.850671  | 0.034882     | 0.91205   | 0.972306  |
| Casz1_j1         | 4.27713    | 4.36048   | 0            | 1         | 1         |
| Gm13067_j3       | 0.0835353  | 0.157638  | 0.91616      | 0.416012  | 0.733677  |
| Slc2a5_j1        | 0.121421   | 0.0745167 | -0.704382    | 0.551366  | 1         |
| Slc2a5_j4        | 0.0349667  | 0.170355  | 2.2845       | 0.318154  | 0.661603  |
| Slc2a5_j6        | 0          | 0.114366  | 1.79769e+308 | 0.0675204 | 1         |
| Gm5506_j4        | 2.23785    | 2.11441   | 0            | 1         | 1         |
| Gm5506_j8        | 69.5809    | 88.1565   | 0            | 1         | 1         |
| Rere_j5          | 0.177046   | 0.373992  | 1.07888      | 0.0253835 | 0.166073  |
| Rere_j7          | 0.0216884  | 0.322909  | 3.89613      | 0.0006947 | 0.0106585 |
| Tnfrsf25_j2      | 0.188313   | 0.261714  | 0            | 1         | 1         |
| Tnfrsf25_j3      | 0.0268432  | 0.134012  | 0            | 1         | 1         |
| XLOC_023283      | 0.189988   | 0.202385  | 0.0911953    | 0.869734  | 0.95857   |
| Acot7_j1         | 114.67     | 129.762   | 0.178369     | 0.0561329 | 0.277181  |
| Megf6_j7         | 0.0829714  | 0.107639  | 0.375516     | 0.557732  | 1         |
| Megf6_j6         | 0          | 0.104538  | 1.79769e+308 | 0.0019501 | 1         |
| Morn1_j7         | 0.323151   | 0.427725  | 0.404477     | 0.332307  | 0.67369   |
| 2010015L04Rik_j1 | 0.050524   | 0.0740056 | 0.550665     | 0.600413  | 1         |
| Nadk_j2          | 3.67302    | 2.22127   | 0            | 1         | 1         |
| Nadk_j3          | 3.36623    | 4.52559   | 0            | 1         | 1         |
| Cdk11b_j4        | 0.223391   | 0.124576  | 0            | 1         | 1         |
| Cdk11b_j9        | 6.44003    | 7.52905   | 0            | 1         | 1         |
| Ssu72_j2         | 8.5158     | 6.07827   | 0            | 1         | 1         |
| Ssu72_j3         | 3.21454    | 6.58839   | 0            | 1         | 1         |
| 2610204G22Rik_j1 | 0.0738251  | 0.319221  | 2.11237      | 0.132377  | 0.452706  |
| Dvl1             | 0.393722   | 0.928143  | 1.23717      | 0.0058048 | 0.0570402 |

|                  |           |           |               |           |           |
|------------------|-----------|-----------|---------------|-----------|-----------|
| Acap3_j8         | 9.34687   | 10.6735   | 0.191472      | 0.17079   | 0.507682  |
| Fam132a_j1       | 0         | 0.0863848 | 1.79769e+308  | 0.105383  | 1         |
| 9430015G10Rik_j7 | 0.0779297 | 0.0949318 | 0.28472       | 0.773347  | 1         |
| XLOC_023327      | 2.19505   | 2.69077   | 0.293765      | 0.205917  | 0.550399  |
| Tmem68_j1        | 0.954967  | 0.255464  | 0             | 1         | 1         |
| Dpy19l4_j1       | 1.76102   | 1.40499   | 0             | 1         | 1         |
| Tmem67_j4        | 0         | 0.212024  | 1.79769e+308  | 0.0008947 | 0.0131044 |
| Otud6b_j5        | 0         | 0.159048  | 0             | 1         | 1         |
| Necab1_j5        | 1.21409   | 3.93613   | 0             | 1         | 1         |
| Osgin2_j4        | 0.22137   | 0.54789   | 0             | 1         | 1         |
| Rip2_j3          | 0.605791  | 1.35348   | 0             | 1         | 1         |
| Rip2_j4          | 0.528282  | 0.517005  | 0             | 1         | 1         |
| Ufl1_j4          | 1.23447   | 2.21907   | 0.846062      | 0.030956  | 0.189737  |
| XLOC_023379      | 0         | 0.148022  | 1.79769e+308  | 0.0639618 | 1         |
| XLOC_023382      | 0.0573427 | 0.0391356 | -0.551129     | 0.695068  | 1         |
| Pm20d2_j2        | 0         | 0.0968627 | 1.79769e+308  | 0.0053233 | 1         |
| Pnrc1_j1         | 23.6313   | 23.8024   | 0.0104121     | 0.931248  | 0.979039  |
| Orc3_j8          | 3.987     | 3.72056   | -0.0997831    | 0.572104  | 0.827134  |
| Lingo2           | 0.65444   | 0.921302  | 0             | 1         | 1         |
| Lingo2_j7        | 2.36562   | 1.49007   | 0             | 1         | 1         |
| Aptx_j5          | 2.95023   | 3.03511   | 0             | 1         | 1         |
| Ubap2_j1         | 11.0791   | 14.1622   | 0             | 1         | 1         |
| Ubap2_j2         | 2.55499   | 1.62122   | 0             | 1         | 1         |
| Dcaf12_j2        | 23.554    | 24.4646   | 0.0547224     | 0.557775  | 0.819817  |
| Dcaf12_j4        | 2.17656   | 2.31767   | 0.0906262     | 0.495705  | 0.782921  |
| Smrp1_j1         | 0.188051  | 0.163356  | -0.203099     | 0.878956  | 0.961379  |
| Smrp1_j3         | 0.0728009 | 0.0447929 | -0.700687     | 0.684483  | 1         |
| Cntfr_j7         | 1.23729   | 2.03347   | 0             | 1         | 1         |
| AK048672_j1      | 1.39795   | 1.74787   | 0.322282      | 0.634116  | 0.858133  |
| AK048672_j2      | 3.49819   | 2.85883   | -0.291183     | 0.37624   | 0.70828   |
| Gm1987_j1        | 1.23153   | 2.0374    | 0.72628       | 0.0228226 | 0.154312  |
| Gm1987_j2        | 0         | 0.285309  | 1.79769e+308  | 0.0124197 | 0.100682  |
| Vcp_j1           | 0.24792   | 0.0640412 | -1.9528       | 0.0068186 | 0.0645171 |
| Vcp_j2           | 0.608248  | 0.766601  | 0.333815      | 0.200697  | 0.544177  |
| Pigo_j3          | 0.10462   | 0.432368  | 2.04711       | 0.0167886 | 0.124671  |
| B230312A22Rik_j6 | 0.790881  | 3.29897   | 0             | 1         | 1         |
| Cd72             | 0.241802  | 0         | -1.79769e+308 | 3.06E-05  | 0.0007872 |
| Rnf38_j8         | 0         | 0.676262  | 0             | 1         | 1         |
| Tomm5_j1         | 1.20643   | 1.39527   | 0.209797      | 0.734109  | 0.90626   |
| Anks6_j8         | 0.532416  | 0.371203  | -0.520346     | 0.147656  | 0.476304  |
| Anks6_j10        | 0.295345  | 0.453005  | 0.617129      | 0.139445  | 0.464425  |
| XLOC_023464      | 0.0399014 | 0.0732507 | 0.876403      | 0.553876  | 1         |
| Abca1_j1         | 10.9992   | 24.024    | 0             | 1         | 1         |
| AK141187_j3      | 0         | 0.0626306 | 1.79769e+308  | 0.0942097 | 1         |
| AK141187_j2      | 0         | 0.141359  | 1.79769e+308  | 0.0505511 | 1         |
| AI427809_j1      | 0         | 0.2137    | 1.79769e+308  | 0.007993  | 0.0724953 |
| AI427809_j2      | 0         | 0.181783  | 1.79769e+308  | 0.0133704 | 0.10606   |

|                  |             |           |              |           |           |
|------------------|-------------|-----------|--------------|-----------|-----------|
| Ikkkap_j2        | 2.21894     | 3.21581   | 0.535311     | 0.164234  | 0.500214  |
| D730040F13Rik_j5 | 0.376756    | 0.407797  | 0            | 1         | 1         |
| Epb4.1l4b_j4     | 0.243714    | 0.412782  | 0.76019      | 0.0317782 | 0.193034  |
| Ptpn3_j1         | 1.84408     | 1.22828   | 0            | 1         | 1         |
| Ptpn3_j2         | 0           | 0.459819  | 0            | 1         | 1         |
| Txn1_j3          | 60.823      | 53.3176   | -0.190007    | 0.354978  | 0.691013  |
| Txn1_j4          | 117.037     | 136.074   | 0.217428     | 0.0454924 | 0.244195  |
| Svep1_j3         | 0.192187    | 0.384718  | 1.00129      | 0.187105  | 0.528052  |
| Lpar1_j2         | 4.86267     | 6.67626   | 0            | 1         | 1         |
| Susd1_j7         | 0           | 0.0556865 | 1.79769e+308 | 0.070444  | 1         |
| Susd1_j6         | 0.0207632   | 0.0821189 | 1.98369      | 0.166014  | 1         |
| Rod1_j5          | 0.76999     | 0.809034  | 0.0713596    | 0.772441  | 0.922804  |
| Fkbp15_j4        | 0.727041    | 0.819567  | 0            | 1         | 1         |
| Rnf183           | 0.0682071   | 0.279048  | 2.03252      | 0.0273145 | 0.174604  |
| Wdr31_j7         | 0.00684224  | 0.178219  | 4.70304      | 0.395457  | 0.720543  |
| Akna             | 0.000282036 | 0.0728943 | 8.01378      | 0.522915  | 1         |
| Whrn_j6          | 2.94973     | 1.45421   | 0            | 1         | 1         |
| Whrn             | 4.32064     | 2.20553   | 0            | 1         | 1         |
| Tnc_j6           | 0.216609    | 0.231501  | 0.0959262    | 0.830868  | 0.945436  |
| XLOC_023520      | 0.0901793   | 0.321444  | 1.8337       | 0.304402  | 0.650023  |
| Dbc1_j3          | 2.4742      | 2.87012   | 0            | 1         | 1         |
| Ptprd_j8         | 0           | 0.0930815 | 1.79769e+308 | 0.0020491 | 1         |
| Ptprd_j7         | 0           | 0.109429  | 1.79769e+308 | 0.0009279 | 1         |
| Ptprd_j1         | 0           | 0.139394  | 1.79769e+308 | 0.0945495 | 1         |
| Mpdz_j5          | 0.19512     | 0.153825  | -0.343071    | 0.439727  | 0.749296  |
| Mpdz_j6          | 0.476714    | 0.622875  | 0.38582      | 0.138552  | 0.462905  |
| Cer1_j1          | 0.267676    | 0.249891  | -0.0991892   | 0.885835  | 0.963769  |
| Frem1_j7         | 0.0252365   | 0.218044  | 3.11104      | 0.0090159 | 0.0792162 |
| Frem1_j10        | 0.0937878   | 0.101662  | 0.116307     | 0.909912  | 1         |
| XLOC_023541      | 0.0768107   | 0.0523646 | -0.552717    | 0.594861  | 1         |
| Bnc2_j5          | 0.0705318   | 0.189653  | 0            | 1         | 1         |
| Plin2_j7         | 0           | 0.44452   | 0            | 1         | 1         |
| Slc24a2_j4       | 2.46469     | 1.70382   | 0            | 1         | 1         |
| XLOC_023557      | 0.862655    | 0.794874  | -0.118057    | 0.647022  | 0.863936  |
| Plaa_j4          | 6.15996     | 6.21238   | 0            | 1         | 1         |
| Plaa_j3          | 1.57168     | 2.29558   | 0            | 1         | 1         |
| Plaa_j2          | 2.54948     | 2.0465    | 0            | 1         | 1         |
| Cyp2j13_j2       | 0.0417932   | 0.0833046 | 0.995126     | 0.502472  | 1         |
| Cyp2j12-ps_j3    | 1.50702     | 1.22439   | -0.299637    | 0.359409  | 0.694666  |
| XLOC_023575      | 0.686399    | 0.733609  | 0.0959634    | 0.602831  | 0.843195  |
| XLOC_023575      | 0.41026     | 0.514411  | 0.326383     | 0.51569   | 0.794419  |
| XLOC_023578      | 1.41438     | 0.654372  | -1.11199     | 0.208329  | 0.552338  |
| Tm2d1_j3         | 3.02134     | 2.44343   | -0.306282    | 0.403948  | 0.72656   |
| Dock7_j4         | 11.922      | 12.0251   | 0.0124124    | 0.932492  | 0.97953   |
| Jak1_j5          | 2.14265     | 3.0304    | 0            | 1         | 1         |
| Jak1_j6          | 7.78684     | 3.16541   | 0            | 1         | 1         |
| AK021368         | 1.06624     | 2.15116   | 1.01259      | 4.75E-05  | 0.0011441 |

|                  |           |           |              |           |           |
|------------------|-----------|-----------|--------------|-----------|-----------|
| Ttc4_j2          | 10.0816   | 11.0382   | 0            | 1         | 1         |
| Gm1027_j6        | 0.117654  | 0.239137  | 1.02328      | 0.355513  | 0.691525  |
| Gm1027_j7        | 2.73E-05  | 0.134128  | 12.2631      | 0.961956  | 1         |
| Acot11_j1        | 0.194309  | 0.767166  | 0            | 1         | 1         |
| Podn_j3          | 0         | 0.0934508 | 1.79769e+308 | 0.0241512 | 1         |
| Zyg11b_j5        | 0.157098  | 0.0618656 | 0            | 1         | 1         |
| AK054420_j1      | 0.203548  | 0.221062  | 0            | 1         | 1         |
| Btf3l4_j1        | 1.24644   | 0.774054  | -0.687313    | 0.0162446 | 0.121777  |
| AK148461_j1      | 2.8404    | 2.24749   | 0            | 1         | 1         |
| Elavl4_j2        | 0.452337  | 0.603401  | 0            | 1         | 1         |
| Cyp4x1_j1        | 3.86411   | 3.8931    | 0            | 1         | 1         |
| Nsun4_j1         | 0.615111  | 0.99132   | 0            | 1         | 1         |
| Mast2            | 1.25273   | 1.37647   | 0.135898     | 0.524709  | 0.800294  |
| Btbd19_j3        | 0.0360183 | 0.151586  | 2.07333      | 0.103182  | 1         |
| Rps8_j5          | 0.753069  | 0.828206  | 0.137208     | 0.791018  | 0.930334  |
| Gm1661_j3        | 0.146686  | 0.277669  | 0.920636     | 0.069451  | 0.315993  |
| Rnf220_j1        | 4.7326    | 3.98006   | 0            | 1         | 1         |
| St3gal3_j3       | 0.121914  | 0.142703  | 0            | 1         | 1         |
| Ptprf_j2         | 6.45143   | 4.91104   | 0            | 1         | 1         |
| Ptprf_j3         | 0.193212  | 0.621221  | 0            | 1         | 1         |
| Szt2_j6          | 0.963034  | 0.929018  | 0            | 1         | 1         |
| Cdc20_j1         | 1.25051   | 1.2699    | 0.0221947    | 0.898875  | 0.967647  |
| AU022252_j4      | 6.08645   | 6.08914   | 0.000636933  | 0.99503   | 0.998626  |
| Ppih_j1          | 0.0813649 | 0.197335  | 1.27817      | 0.386389  | 0.714571  |
| Ppcs_j3          | 5.93408   | 3.80236   | 0            | 1         | 1         |
| Kcnq4_j4         | 0.0996315 | 0.233382  | 0            | 1         | 1         |
| Smap2_j2         | 0         | 0.164912  | 0            | 1         | 1         |
| Mfsd2a_j2        | 8.07325   | 7.73976   | 0            | 1         | 1         |
| Macf1_j3         | 0.104175  | 0.229939  | 1.14224      | 0.0002644 | 0.0048275 |
| Macf1_j18        | 0.0446248 | 0.223529  | 2.32455      | 0.0880212 | 0.363213  |
| 1700029G01Rik_j5 | 0.0331874 | 0.234267  | 2.81944      | 0.0902365 | 0.368817  |
| 1700029G01Rik_j7 | 0.0483139 | 0.170123  | 1.81607      | 0.0767349 | 0.334845  |
| Thrap3_j10       | 0.778412  | 0.718655  | -0.115235    | 0.895763  | 0.96693   |
| Thrap3_j21       | 5.21914   | 5.27258   | 0.014697     | 1         | 1         |
| Mtap7d1_j2       | 0.35151   | 0.403188  | 0            | 1         | 1         |
| Mtap7d1_j11      | 2.47385   | 3.52145   | 0            | 1         | 1         |
| Adprhl2_j4       | 1.57313   | 3.06605   | 0            | 1         | 1         |
| Tekt2_j2         | 0.304733  | 0.11885   | 0            | 1         | 1         |
| Eif2c4_j4        | 0.0588955 | 0.253559  | 2.10609      | 0.0002813 | 0.0050707 |
| Ncdn_j8          | 7.28553   | 8.60129   | 0            | 1         | 1         |
| Zscan20_j2       | 0.308289  | 0.244682  | -0.333379    | 0.436616  | 0.747163  |
| Rbbp4_j1         | 0.36214   | 1.48159   | 2.03253      | 1.54E-13  | 2.49E-11  |
| Eif3i_j1         | 1.11354   | 1.12326   | 0            | 1         | 1         |
| Eif3i_j2         | 0.321873  | 0.409487  | 0            | 1         | 1         |
| Txlna_j6         | 0.834619  | 0.866747  | 0            | 1         | 1         |
| Kpna6_j4         | 0.210304  | 1.69949   | 0            | 1         | 1         |
| Tmem39b_j1       | 1.34482   | 1.72617   | 0.360163     | 0.345931  | 0.685212  |

|                  |           |            |              |           |           |
|------------------|-----------|------------|--------------|-----------|-----------|
| Hcrtr1_j2        | 0.720171  | 0.98305    | 0.448925     | 0.362703  | 0.697013  |
| Serinc2_j4       | 2.4287    | 5.29573    | 0            | 1         | 1         |
| Ptpru_j5         | 0         | 0.106476   | 1.79769e+308 | 0.0250647 | 1         |
| Epb4.1_j3        | 0.0740327 | 0.145696   | 0.976727     | 0.0905017 | 1         |
| Epb4.1_j15       | 1.36003   | 1.02407    | -0.409323    | 0.0120793 | 0.0986779 |
| Gmeb1            | 0         | 0.0603608  | 0            | 1         | 1         |
| Gmeb1_j1         | 0.0786142 | 0.388461   | 0            | 1         | 1         |
| Phactr4_j4       | 0.0746468 | 0.287852   | 0            | 1         | 1         |
| Stx12_j3         | 16.0669   | 17.7153    | 0            | 1         | 1         |
| Tmem222_j1       | 0.69794   | 0.655188   | -0.0911937   | 0.85073   | 0.9526    |
| Nudc_j2          | 0.29666   | 0.37717    | 0            | 1         | 1         |
| Zdhhc18_j5       | 0.39641   | 1.3247     | 0            | 1         | 1         |
| Pigv_j4          | 1.04209   | 1.09779    | 0            | 1         | 1         |
| Arid1a           | 0.613896  | 0.798187   | 0            | 1         | 1         |
| Hmgn2_j5         | 0.243411  | 0.221226   | -0.137875    | 0.850248  | 0.952363  |
| Hmgn2_j6         | 0.0535356 | 0.109034   | 1.02621      | 0.429598  | 1         |
| Dhdds            | 6.62495   | 5.50571    | 0            | 1         | 1         |
| Cd52_j1          | 3.53007   | 6.88635    | 0.964043     | 1.02E-05  | 0.0003147 |
| Fam54b_j4        | 0         | 0.282425   | 0            | 1         | 1         |
| Tmem57_j3        | 3.69192   | 2.74326    | 0            | 1         | 1         |
| Srrm1_j1         | 0.245754  | 0.192759   | 0            | 1         | 1         |
| A330049M08Rik_j5 | 4.38669   | 5.46845    | 0            | 1         | 1         |
| Grhl3_j1         | 0.963656  | 1.08693    | 0.173665     | 0.703548  | 0.891491  |
| Grhl3_j2         | 1.51057   | 0.836516   | -0.85263     | 0.004096  | 0.0436524 |
| Pnrc2_j1         | 3.74861   | 2.28811    | -0.7122      | 0.0058093 | 0.0570614 |
| 1110049F12Rik_j1 | 27.7583   | 29.3225    | 0            | 1         | 1         |
| Rpl11_j6         | 1.16115   | 1.44402    | 0.314541     | 0.393405  | 0.71936   |
| Rpl11_j7         | 4.06684   | 4.73189    | 0.218509     | 0.304346  | 0.650023  |
| Ephb2_j2         | 0.0909877 | 0.293412   | 1.68919      | 0.0018214 | 0.0232172 |
| Epha8_j9         | 0.0457633 | 0.0934304  | 1.0297       | 0.280288  | 1         |
| Epha8_j10        | 0.149901  | 0.0755598  | -0.98832     | 0.185608  | 0.525906  |
| Cdc42_j3         | 19.7432   | 22.7808    | 0            | 1         | 1         |
| Cda_j2           | 30.6421   | 32.9059    | 0.102832     | 0.381531  | 0.711932  |
| Nbl1_j2          | 3.54978   | 2.66466    | 0            | 1         | 1         |
| 2310028O11Rik_j3 | 24.0479   | 25.4328    | 0            | 1         | 1         |
| Igsf21_j4        | 5.11047   | 4.07482    | 0            | 1         | 1         |
| Arhgef10_j7      | 0.101621  | 0.447052   | 0            | 1         | 1         |
| Arhgef10l        | 3.13028   | 3.50036    | 0            | 1         | 1         |
| Crocc_j9         | 0         | 0.205709   | 1.79769e+308 | 3.38E-06  | 0.0001204 |
| Crocc_j10        | 0         | 0.126305   | 1.79769e+308 | 0.0002476 | 1         |
| Spen             | 0.398127  | 0.385981   | 0            | 1         | 1         |
| Fblim1_j2        | 0.0970448 | 0.103627   | 0.094675     | 0.912784  | 1         |
| Slc25a34_j1      | 0.0305791 | 0.108027   | 1.82078      | 0.177315  | 1         |
| Plekhn2_j1       | 0.96872   | 1.14755    | 0            | 1         | 1         |
| Plekhn2_j3       | 0.115827  | 0.00180799 | 0            | 1         | 1         |
| Plekhn2_j2       | 0.313679  | 0.434724   | 0            | 1         | 1         |
| Ddi2_j4          | 0         | 0.0498118  | 0            | 1         | 1         |



|                  |            |           |               |           |           |
|------------------|------------|-----------|---------------|-----------|-----------|
| Ddi2_j3          | 0.539603   | 1.55549   | 0             | 1         | 1         |
| Fhad1_j8         | 0          | 0.13452   | 1.79769e+308  | 0.0432937 | 1         |
| Tmem51_j2        | 0          | 0.751286  | 1.79769e+308  | 3.55E-05  | 0.0008918 |
| Prdm2_j5         | 0.347852   | 0.403853  | 0             | 1         | 1         |
| Prdm2_j7         | 0.0900506  | 0.188665  | 0             | 1         | 1         |
| Prdm2_j6         | 3.10857    | 3.9686    | 0             | 1         | 1         |
| Pdpn_j1          | 1.31532    | 2.41531   | 0.876791      | 0.0094353 | 0.082073  |
| Vps13d_j3        | 0.211683   | 1.10292   | 0             | 1         | 1         |
| Vps13d_j4        | 0          | 0.0694861 | 0             | 1         | 1         |
| 2610305D13Rik_j2 | 1.09649    | 1.13258   | 0             | 1         | 1         |
| Gm13157_j5       | 0          | 0.171697  | 0             | 1         | 1         |
| Clcn6_j1         | 1.09869    | 1.04113   | -0.0776327    | 0.692275  | 0.886092  |
| Clcn6_j2         | 0.740107   | 0.755552  | 0.0297976     | 0.888317  | 0.964658  |
| Tardbp_j1        | 1.67212    | 5.32761   | 0             | 1         | 1         |
| Pex14_j4         | 0          | 0.0637932 | 1.79769e+308  | 0.111636  | 1         |
| Pgd_j3           | 4.46571    | 10.609    | 0             | 1         | 1         |
| Tmem201_j1       | 0.0842328  | 0.295201  | 0             | 1         | 1         |
| Tmem201_j2       | 1.01072    | 0.949003  | 0             | 1         | 1         |
| Camta1_j8        | 0.328302   | 0.419192  | 0             | 1         | 1         |
| Zbtb48_j7        | 0.00170927 | 0.219628  | 7.00553       | 0.577315  | 0.829534  |
| Tas1r1_j2        | 0.0605286  | 0.0708609 | 0.227374      | 0.814775  | 1         |
| Espn_j3          | 0.204943   | 0.262672  | 0             | 1         | 1         |
| Espn_j4          | 0.14212    | 0.21908   | 0             | 1         | 1         |
| Rnf207_j2        | 2.93803    | 2.45374   | 0             | 1         | 1         |
| Kcnab2_j2        | 96.397     | 76.0348   | 0             | 1         | 1         |
| Tprgl_j2         | 86.5096    | 89.6914   | 0             | 1         | 1         |
| Arhgef16_j2      | 0.0767786  | 0.147046  | 0.937488      | 0.396499  | 1         |
| Prdm16           | 0.441913   | 0.254894  | -0.793866     | 0.0087456 | 0.0775405 |
| Plch2_j7         | 0          | 0.0974779 | 1.79769e+308  | 0.0112329 | 1         |
| Prkcz_j6         | 0.5617     | 0.629347  | 0.164056      | 0.643683  | 0.862605  |
| Mmp23_j1         | 0.135523   | 0.259306  | 0.936122      | 0.144275  | 0.471393  |
| Mib2             | 7.08249    | 8.01503   | 0.178451      | 0.141302  | 0.467544  |
| Mib2_j7          | 1.67215    | 1.37326   | -0.284105     | 0.236413  | 0.583594  |
| Atad3a_j6        | 0.0602236  | 0.0585349 | 0             | 1         | 1         |
| Gm10560_j1       | 0.532802   | 0.672888  | 0.336767      | 0.156264  | 0.48978   |
| Agrn_j5          | 2.44678    | 2.47341   | 0             | 1         | 1         |
| Agrn_j6          | 0.0574921  | 0.0340661 | 0             | 1         | 1         |
| Plekhn1_j8       | 0.73459    | 0.628373  | 0             | 1         | 1         |
| Plekhn1_j14      | 0.954083   | 0.939204  | 0             | 1         | 1         |
| Gm15772          | 260.647    | 295.137   | 0.179291      | 0.041017  | 0.227643  |
| Cdk6             | 0.205865   | 0.108009  | -0.930556     | 0.0252412 | 0.165431  |
| Cdk6_j4          | 0.0474957  | 0         | -1.79769e+308 | 0.0002487 | 1         |
| Fam133b          | 8.71012    | 8.12724   | -0.0999266    | 0.424173  | 0.739562  |
| Krit1_j3         | 0.168891   | 0.0188822 | 0             | 1         | 1         |
| Akap9            | 0.387929   | 0.109804  | 0             | 1         | 1         |
| Gm9897           | 0.554958   | 0.317925  | -0.80369      | 0.162654  | 0.498056  |
| Gm8773           | 0.725291   | 0.412006  | -0.815893     | 0.159287  | 0.493926  |

|                  |           |                 |             |           |           |
|------------------|-----------|-----------------|-------------|-----------|-----------|
| XLOC_025083      | 0.324025  | 0.274927        | -0.237056   | 0.816663  | 0.940333  |
| Gm8802           | 6.2404    | 6.77312         | 0.118181    | 0.500887  | 0.785143  |
| Steap4           | 2.6814    | 4.26875         | 0.67083     | 1.88E-06  | 7.17E-05  |
| Sri              | 19.7478   | 19.4152         | -0.0245033  | 0.776839  | 0.924603  |
| Slc25a40_j2      | 0.617484  | 0.432803        | -0.512689   | 0.564786  | 0.823552  |
| Slc25a40_j6      | 4.6588    | 4.39979         | -0.0825219  | 0.625951  | 0.854009  |
| Slc25a40_j7      | 0.571944  | 0.502142        | -0.187779   | 0.565309  | 0.823793  |
| 4930420K17Rik    | 0.195727  | 0.360112        | 0           | 1         | 1         |
| 9330182L06Rik_j1 | 0.119216  | 0.351993        | 0           | 1         | 1         |
| 9330182L06Rik    | 6.56305   | 5.02879         | 0           | 1         | 1         |
| 4933402N22Rik    | 0.276972  | 0.752469        | 1.44189     | 0.0052329 | 0.0524682 |
| Sema3d           | 0.71602   | 0.879492        | 0.296671    | 0.159287  | 0.493926  |
| Sema3d_j1        | 0.449506  | 0.000194834     | -11.1719    | 0.574197  | 0.827934  |
| Sema3e           | 2.19715   | 1.52737         | -0.524589   | 0.0001224 | 0.002545  |
| Pclo             | 0.687313  | 0.568411        | 0           | 1         | 1         |
| Pclo_j8          | 1.15949   | 0.921195        | 0           | 1         | 1         |
| Cacna2d1         | 8.19434   | 6.95264         | 0           | 1         | 1         |
| Cacna2d1_j3      | 1.73511   | 6.99967         | 0           | 1         | 1         |
| Cacna2d1_j2      | 4.42208   | 12.6491         | 0           | 1         | 1         |
| Hgf              | 0.703487  | 0.491991        | -0.515892   | 0.0707848 | 0.319792  |
| Sema3c           | 4.3016    | 6.04965         | 0.491978    | 1.38E-05  | 0.0004071 |
| Magi2_j8         | 0.139926  | 0.109145        | -0.358417   | 0.61503   | 0.848043  |
| Magi2_j7         | 0.240781  | 0 -1.79769e+308 |             | 1.44E-07  | 7.41E-06  |
| Tmem60           | 11.2617   | 8.8352          | -0.350085   | 0.0150381 | 0.11511   |
| Tmem60_j1        | 3.24733   | 5.153           | 0.666157    | 0.0059226 | 0.0579171 |
| Pion_j2          | 0.398869  | 0.619924        | 0           | 1         | 1         |
| Pion             | 0.98997   | 0.966993        | 0           | 1         | 1         |
| Pion_j4          | 0.540901  | 0.508457        | 0           | 1         | 1         |
| Fgl2             | 2.30201   | 3.96481         | 0.784359    | 2.48E-08  | 1.59E-06  |
| Fam185a          | 4.08195   | 3.84562         | -0.0860428  | 0.571235  | 0.826767  |
| Lrrc17           | 0.970785  | 0.869108        | -0.159616   | 0.524898  | 0.800393  |
| Gm6543           | 2.63051   | 2.75159         | 0.0649235   | 0.784596  | 0.92757   |
| Armc10_j1        | 0.0568044 | 0 -1.79769e+308 |             | 0.0034986 | 1         |
| Pmpcb            | 21.716    | 21.151          | -0.0380317  | 0.723038  | 0.901397  |
| Psmc2            | 29.8327   | 29.6344         | -0.00962008 | 0.923558  | 0.976223  |
| AK044020_j1      | 0.313739  | 0.139064        | -1.17382    | 0.373955  | 0.70679   |
| Lhfp13_j1        | 0.840304  | 0.859282        | 0           | 1         | 1         |
| Lhfp13_j7        | 0.0942233 | 0               | 0           | 1         | 1         |
| Mll5             | 2.70945   | 2.47146         | 0           | 1         | 1         |
| Rint1            | 1.17794   | 1.24986         | 0           | 1         | 1         |
| Klhl7            | 17.8402   | 16.9953         | -0.0699914  | 0.488999  | 0.779368  |
| Nupl2            | 2.87324   | 2.95964         | 0.0427397   | 0.776294  | 0.92437   |
| Accn3            | 0.812699  | 0.863025        | 0.0866809   | 0.670176  | 0.875218  |
| Agap3_j2         | 21.5241   | 19.3563         | 0           | 1         | 1         |
| Agap3_j3         | 2.95848   | 2.89679         | 0           | 1         | 1         |
| Agap3_j4         | 20.7898   | 23.3792         | 0           | 1         | 1         |
| Chpf2            | 2.3055    | 1.23013         | -0.906267   | 4.11E-08  | 2.48E-06  |

|               |          |           |               |           |           |
|---------------|----------|-----------|---------------|-----------|-----------|
| Nub1          | 9.42429  | 7.22578   | 0             | 1         | 1         |
| Nub1_j2       | 11.782   | 16.6655   | 0             | 1         | 1         |
| XLOC_025135   | 0.145441 | 0.0898563 | 0             | 1         | 1         |
| Galnt11       | 10.5432  | 9.99103   | -0.0776114    | 0.495273  | 0.782763  |
| Actr3b        | 8.26294  | 7.95319   | 0             | 1         | 1         |
| Dpp6_j3       | 0.244929 | 0.262889  | 0.10209       | 0.906585  | 0.970402  |
| Dpp6_j1       | 1.39537  | 1.83439   | 0.394653      | 0.253075  | 0.601097  |
| Dpp6_j2       | 0.346287 | 0.0197053 | -4.13531      | 0.0710476 | 0.320458  |
| Dpp6_j8       | 19.815   | 17.0049   | 0             | 1         | 1         |
| Htr5a         | 0.61919  | 0.414974  | -0.577363     | 0.0455266 | 0.244264  |
| Htr5a_j1      | 0.157535 | 0.0513295 | -1.61781      | 0.0636378 | 0.299119  |
| Insig1        | 43.7244  | 49.2358   | 0.17127       | 0.0531931 | 0.268439  |
| Rbm33         | 1.59156  | 1.42025   | 0             | 1         | 1         |
| Rbm33_j1      | 0.123121 | 0         | 0             | 1         | 1         |
| Rbm33         | 1.07399  | 0.424299  | 0             | 1         | 1         |
| Rnf32_j2      | 0.907758 | 0.729078  | -0.316234     | 0.366197  | 0.700066  |
| Rnf32         | 0.549745 | 0.348924  | -0.655851     | 0.0480824 | 0.252235  |
| Nom1          | 3.35063  | 2.98166   | -0.168317     | 0.213746  | 0.558982  |
| Ube3c         | 17.0077  | 13.9089   | 0             | 1         | 1         |
| Ube3c_j5      | 1.7572   | 0         | 0             | 1         | 1         |
| Dnajb6_j1     | 0.559478 | 0.479308  | -0.223128     | 0.714398  | 0.89656   |
| Hadhb_j1      | 0.183245 | 0.147068  | -0.31729      | 0.584002  | 0.833245  |
| Hadhb_j6      | 12.6926  | 12.8437   | 0.0170723     | 0.89528   | 0.966918  |
| Ept1          | 9.08006  | 7.83536   | 0             | 1         | 1         |
| Ept1_j1       | 3.59997  | 3.02295   | 0             | 1         | 1         |
| Gm1060        | 0.521116 | 0.536817  | 0.0428243     | 0.901952  | 0.968734  |
| Gm1060_j5     | 0.189422 | 0         | -1.79769e+308 | 0.0003575 | 0.0061543 |
| Kcnk3         | 1.53279  | 1.55805   | 0.0235768     | 0.90997   | 0.971581  |
| Kcnk3_j1      | 0.71826  | 0.536663  | -0.42049      | 0.235211  | 0.582451  |
| 4930471M23Rik | 15.8954  | 19.5224   | 0.29652       | 0.002327  | 0.0281309 |
| Cenp-a        | 0.24789  | 0.232511  | -0.0924036    | 0.891922  | 0.965687  |
| Cenpa         | 0.321407 | 0.259466  | -0.308856     | 0.644137  | 0.862786  |
| Dpys15        | 17.5667  | 19.6914   | 0             | 1         | 1         |
| Tmem214_j3    | 1.04084  | 1.50155   | 0.528704      | 0.0063889 | 0.0614654 |
| Agbl5         | 0.701392 | 0.716413  | 0.0305708     | 0.910423  | 0.971772  |
| Emilin1_j2    | 0.195636 | 0.280672  | 0.520712      | 0.276067  | 0.624922  |
| Khk_j2        | 3.31778  | 2.92185   | -0.183336     | 0.17001   | 0.507178  |
| Khk_j1        | 2.14947  | 1.89253   | -0.183663     | 0.256955  | 0.605736  |
| Abhd1_j2      | 0.426966 | 0.255992  | -0.738024     | 0.0229015 | 0.154736  |
| 0610007C21Rik | 14.2667  | 15.7963   | 0             | 1         | 1         |
| Cad           | 0.110416 | 0.297179  | 0             | 1         | 1         |
| Snx17         | 0.371238 | 0.352537  | 0             | 1         | 1         |
| Snx17_j2      | 0.940211 | 1.26661   | 0             | 1         | 1         |
| Nrbp1_j1      | 3.71116  | 4.04454   | 0             | 1         | 1         |
| Nrbp1_j2      | 2.07923  | 1.49846   | 0             | 1         | 1         |
| Zfp512_j4     | 7.38006  | 7.36091   | 0             | 1         | 1         |
| Zfp512        | 0.439132 | 0.398363  | 0             | 1         | 1         |

|                  |           |            |               |           |           |
|------------------|-----------|------------|---------------|-----------|-----------|
| Gpn1             | 4.49064   | 4.56197    | 0.0227355     | 0.863887  | 0.956651  |
| Slc4a1ap_j1      | 2.02974   | 2.11911    | 0             | 1         | 1         |
| Slc4a1ap         | 2.1509    | 1.99069    | 0             | 1         | 1         |
| Mrpl33           | 32.2077   | 37.4919    | 0             | 1         | 1         |
| Bre              | 7.03986   | 6.21018    | 0             | 1         | 1         |
| Fosl2            | 1.15357   | 1.3877     | 0.266592      | 0.125609  | 0.441522  |
| Fosl2_j1         | 0.734097  | 0.13293    | -2.4653       | 7.98E-07  | 3.42E-05  |
| Ppp1cb           | 20.5309   | 18.0069    | 0             | 1         | 1         |
| Ppp1cb_j1        | 0.985908  | 0.101477   | 0             | 1         | 1         |
| Yes1             | 0.797484  | 0.280723   | -1.50631      | 4.19E-05  | 0.0010254 |
| Yes1             | 1.00465   | 1.24662    | 0.31133       | 0.148405  | 0.477304  |
| Gm2420_j1        | 0.147123  | 0.219199   | 0.57522       | 0.59537   | 0.838854  |
| Depdc5_j6        | 0.648685  | 0.487487   | -0.412154     | 0.203264  | 0.5472    |
| Depdc5_j5        | 6.67174   | 4.4519     | -0.583641     | 2.31E-06  | 8.63E-05  |
| XLOC_025181      | 0.215934  | 0.0937143  | -1.20425      | 0.0520235 | 0.26473   |
| Ywhah            | 286.735   | 270.576    | 0             | 1         | 1         |
| Ywhah_j5         | 599.999   | 637.596    | 0             | 1         | 1         |
| Maea             | 56.9024   | 52.2963    | -0.121781     | 0.165267  | 0.501638  |
| Maea_j1          | 0.130474  | 0          | -1.79769e+308 | 0.0258725 | 1         |
| 4933407H18Rik_j2 | 0.359203  | 0.229696   | -0.645074     | 0.0521283 | 0.264967  |
| Tacc3            | 0.794659  | 0.751962   | 0             | 1         | 1         |
| Fgfr3_j2         | 0.200462  | 0.222484   | 0.150378      | 0.583585  | 0.833132  |
| Whsc1_j1         | 0.179092  | 0.0291015  | 0             | 1         | 1         |
| Whsc1_j4         | 0.0601104 | 0.00101623 | 0             | 1         | 1         |
| Whsc1_j3         | 0.408727  | 0.634828   | 0             | 1         | 1         |
| Gm1673           | 7.08848   | 7.66548    | 0.112899      | 0.554905  | 0.817856  |
| Nat8l            | 7.30883   | 4.89441    | 0             | 1         | 1         |
| Nat8l_j1         | 70.9047   | 43.6941    | 0             | 1         | 1         |
| Rnf4_j2          | 18.8685   | 19.8032    | 0.0697517     | 0.483114  | 0.775896  |
| Add1_j3          | 35.0665   | 32.6401    | 0             | 1         | 1         |
| Grk4             | 0.120858  | 0.129827   | 0.10328       | 0.875573  | 1         |
| Rgs12            | 1.52348   | 1.39178    | 0             | 1         | 1         |
| Dok7_j3          | 0.693176  | 0.422622   | 0             | 1         | 1         |
| XLOC_025200      | 0.123038  | 5.54E-05   | -11.1172      | 0.956211  | 1         |
| XLOC_025200      | 0.48383   | 0.4425     | -0.128825     | 0.754662  | 0.915367  |
| XLOC_025200      | 0.073146  | 0          | -1.79769e+308 | 0.0296246 | 1         |
| Adra2c           | 8.24632   | 5.82434    | -0.501655     | 5.32E-05  | 0.001259  |
| XLOC_025201      | 0.18529   | 0.0837509  | -1.14561      | 0.13939   | 0.464357  |
| Hmx1_j1          | 0.670836  | 0.911005   | 0.4415        | 0.0091254 | 0.0800631 |
| Acox3            | 6.35931   | 5.28664    | 0             | 1         | 1         |
| Acox3_j3         | 0.513883  | 0.561607   | 0             | 1         | 1         |
| Ablim2_j4        | 4.25855   | 3.07432    | 0             | 1         | 1         |
| Afap1            | 0.68439   | 0.28001    | 0             | 1         | 1         |
| Afap1_j2         | 0.0514652 | 0          | 0             | 1         | 1         |
| Grpel1           | 9.06477   | 9.71295    | 0.0996383     | 0.296141  | 0.642962  |
| Ccdc96           | 0.591345  | 0.538781   | -0.134302     | 0.562766  | 0.822297  |
| Ppp2r2c_j2       | 0.294418  | 0          | -1.79769e+308 | 1.05E-06  | 4.31E-05  |

|               |           |                 |            |           |           |
|---------------|-----------|-----------------|------------|-----------|-----------|
| Ppp2r2c       | 96.7285   | 99.5311         | 0.0412057  | 0.631874  | 0.856815  |
| Jakmip1_j4    | 0.287634  | 0.664747        | 1.20857    | 0.0092218 | 0.0806914 |
| Crmp1_j1      | 10.8163   | 15.1648         | 0          | 1         | 1         |
| Crmp1         | 31.3129   | 39.5744         | 0          | 1         | 1         |
| Evc2          | 0.54072   | 0.682822        | 0.336629   | 0.198406  | 0.541602  |
| Evc2_j7       | 0.797767  | 0.850575        | 0.0924721  | 0.848075  | 0.951888  |
| XLOC_025216   | 0.571718  | 0.24717         | -1.2098    | 0.366483  | 0.700205  |
| XLOC_025217   | 0.16512   | 0.0749056       | -1.14037   | 0.12986   | 0.448865  |
| Stx18         | 4.87576   | 4.79754         | -0.0233334 | 0.826934  | 0.94428   |
| Lyar_j1       | 0.115028  | 0 -1.79769e+308 |            | 0.00954   | 1         |
| Lyar_j4       | 0.831676  | 0.253235        | -1.71555   | 0.0173821 | 0.12774   |
| Tmem128       | 17.7336   | 18.0256         | 0.0235591  | 0.839876  | 0.949215  |
| Otop1         | 0.504933  | 0.552818        | 0.130713   | 0.675242  | 0.877609  |
| Gm7816        | 78.9471   | 71.6378         | -0.140165  | 0.122546  | 0.435655  |
| Cpeb2         | 2.34118   | 1.90205         | 0          | 1         | 1         |
| Cpeb2_j3      | 10.9795   | 9.87303         | 0          | 1         | 1         |
| C1qtnf7_j1    | 0.428493  | 0.408683        | -0.0682894 | 0.844138  | 0.950736  |
| C1qtnf7       | 0.94824   | 0.649154        | -0.546692  | 0.027289  | 0.174556  |
| Cc2d2a_j1     | 1.33798   | 0.937803        | 0          | 1         | 1         |
| Cc2d2a_j5     | 0.152584  | 0               | 0          | 1         | 1         |
| Cd38          | 0.478882  | 0.543154        | 0.181693   | 0.585113  | 0.833924  |
| Cd38_j2       | 0.18883   | 0.216276        | 0.195784   | 0.793608  | 0.931169  |
| Clrn2         | 1.31554   | 0.868766        | -0.59862   | 0.0002089 | 0.0039788 |
| Lap3          | 0.380103  | 0               | 0          | 1         | 1         |
| Lap3_j2       | 14.0274   | 15.2696         | 0          | 1         | 1         |
| XLOC_025238   | 0.116927  | 0.0885759       | -0.400617  | 0.732859  | 1         |
| Med28         | 9.61873   | 10.612          | 0.141774   | 0.147232  | 0.475789  |
| Slit2         | 0.668038  | 0.245385        | 0          | 1         | 1         |
| Slit2_j1      | 0.122885  | 0.02242         | 0          | 1         | 1         |
| Slit2_j10     | 0.0630634 | 0               | 0          | 1         | 1         |
| Pacrgl_j1     | 0.81197   | 0.373357        | 0          | 1         | 1         |
| Gm5555        | 49.1766   | 54.941          | 0.159911   | 0.0911811 | 0.371149  |
| 9230114K14Rik | 0.512264  | 0.401871        | -0.350157  | 0.156015  | 0.489534  |
| Sod3          | 13.2032   | 13.7921         | 0.0629571  | 0.588505  | 0.835561  |
| Pi4k2b        | 0.921225  | 0.861393        | -0.0968825 | 0.731863  | 0.905184  |
| Zcchc4        | 3.05345   | 2.75304         | -0.149412  | 0.409495  | 0.729829  |
| XLOC_025248   | 0.0507019 | 0.0402079       | -0.33456   | 0.826945  | 1         |
| Anapc4        | 7.14631   | 7.28027         | 0.0267925  | 0.842582  | 0.950263  |
| Anapc4_j1     | 25.5305   | 25.7499         | 0.0123489  | 0.902029  | 0.968734  |
| Slc34a2       | 0.334254  | 0.321062        | -0.0580925 | 0.841977  | 0.950086  |
| XLOC_025250   | 0.1032    | 0.0818446       | 0          | 1         | 1         |
| XLOC_025250   | 0.53121   | 0.366344        | 0          | 1         | 1         |
| XLOC_025250   | 0.0838181 | 0.10363         | 0          | 1         | 1         |
| 1810013D10Rik | 8.60866   | 9.06911         | 0.0751719  | 0.435678  | 0.746463  |
| Tbc1d19       | 0.991448  | 1.7589          | 0          | 1         | 1         |
| Stim2         | 3.22544   | 3.37663         | 0.0660892  | 0.641356  | 0.861715  |
| Stim2_j2      | 0.106283  | 0 -1.79769e+308 |            | 0.0002156 | 1         |

|               |           |                 |             |           |           |
|---------------|-----------|-----------------|-------------|-----------|-----------|
| XLOC_025255   | 0.247206  | 0.0273926       | -3.17386    | 0.373333  | 0.706263  |
| Gm15975       | 3.66458   | 3.92167         | 0.0978216   | 0.561769  | 0.821809  |
| Cbfa2t2-ps1   | 1.08437   | 1.07709         | -0.00972159 | 0.976061  | 0.993119  |
| G6pd2         | 4.97051   | 5.96831         | 0.263929    | 0.0833292 | 0.351959  |
| 3110047P2ORik | 2.59727   | 2.0249          | 0           | 1         | 1         |
| 0610040J01Rik | 2.44226   | 2.28773         | -0.0942973  | 0.624763  | 0.853468  |
| Pgm1_j7       | 0.247647  | 0.611169        | 1.30329     | 0.002232  | 0.0271773 |
| Pgm1_j8       | 0.114928  | 0.160435        | 0.481259    | 0.574996  | 0.828142  |
| Pgm1_j10      | 1.45937   | 2.06789         | 0.502813    | 0.0284289 | 0.179282  |
| mKIAA1108     | 0.133821  | 0.112823        | 0           | 1         | 1         |
| Tbc1d1        | 0.0826347 | 0.321126        | 0           | 1         | 1         |
| Tbc1d1_j1     | 1.90243   | 1.34703         | 0           | 1         | 1         |
| Klf3          | 1.60454   | 1.25422         | 0           | 1         | 1         |
| Klf3_j3       | 0.243704  | 0               | 0           | 1         | 1         |
| Fam114a1      | 7.26608   | 6.57447         | -0.144302   | 0.195847  | 0.538405  |
| Klh5_j3       | 6.98308   | 6.90452         | 0           | 1         | 1         |
| Klh5          | 13.4696   | 9.71548         | 0           | 1         | 1         |
| Klh5_j6       | 6.70657   | 5.86487         | 0           | 1         | 1         |
| Wdr19_j5      | 0.436887  | 0.152555        | -1.51793    | 0.0020281 | 0.0252558 |
| Wdr19         | 0.234547  | 0.242689        | 0.0492326   | 0.903528  | 0.969103  |
| Lias          | 3.14506   | 2.55818         | 0           | 1         | 1         |
| Ube2k         | 6.80439   | 6.23207         | 0           | 1         | 1         |
| N4bp2_j2      | 0.0479705 | 0 -1.79769e+308 | 0.0038829   |           | 1         |
| Uchl1_j3      | 1042.52   | 1307.18         | 0           | 1         | 1         |
| Uchl1_j2      | 611.778   | 643.233         | 0           | 1         | 1         |
| Limch1        | 1.22173   | 1.48186         | 0           | 1         | 1         |
| Limch1_j1     | 0.151729  | 0               | 0           | 1         | 1         |
| Gm6517        | 9.83553   | 11.5777         | 0.23528     | 0.161341  | 0.496211  |
| Limch1        | 2.06175   | 2.393           | 0           | 1         | 1         |
| Tmem33        | 0.301721  | 0.26266         | -0.200022   | 0.561845  | 0.821818  |
| Slc30a9       | 14.7091   | 11.539          | 0           | 1         | 1         |
| XLOC_025279   | 0.137662  | 0.0681057       | -1.01528    | 0.257377  | 0.606261  |
| XLOC_025279   | 0.328835  | 0.181829        | -0.854782   | 0.0489455 | 0.254788  |
| Shisa3        | 0.901158  | 0.922616        | 0.0339512   | 0.865915  | 0.957262  |
| XLOC_025284   | 0.481002  | 0.230685        | -1.06012    | 0.280671  | 0.629224  |
| XLOC_025284   | 0.450503  | 0.0883061       | -2.35095    | 0.285262  | 0.634024  |
| Guf1_j2       | 0.476743  | 0.525291        | 0.139907    | 0.449107  | 0.755368  |
| Gabrb1        | 0.279363  | 0.480859        | 0.783471    | 0.0541206 | 0.271154  |
| Atp10d_j1     | 0.0730119 | 0.0122773       | -2.57214    | 0.0679949 | 1         |
| Atp10d        | 0.142108  | 0.175415        | 0.303785    | 0.506904  | 0.789319  |
| Atp10d_j10    | 0.0982301 | 0 -1.79769e+308 | 0.0019762   |           | 1         |
| Atp10d_j11    | 0.216116  | 0.325456        | 0.590654    | 0.238229  | 0.585115  |
| Slain2        | 4.25687   | 4.24019         | -0.00566497 | 0.96057   | 0.988869  |
| Slain2        | 1.23339   | 1.46387         | 0.247151    | 0.177386  | 0.516667  |
| Slc10a4_j1    | 0.0516504 | 0 -1.79769e+308 | 0.0543217   |           | 1         |
| Slc10a4       | 0.27452   | 0.298311        | 0.119904    | 0.79289   | 0.931005  |
| Ociad1        | 139.489   | 132.934         | -0.0694441  | 0.428356  | 0.74228   |

|                  |           |            |            |           |           |
|------------------|-----------|------------|------------|-----------|-----------|
| Ociad1_j1        | 14.6041   | 15.7368    | 0.107764   | 0.549512  | 0.814804  |
| Cwh43_j1         | 0.278649  | 0.1993     | -0.483509  | 0.39924   | 0.722895  |
| Dcun1d4          | 0.686     | 0.167816   | 0          | 1         | 1         |
| Dcun1d4          | 5.61262   | 3.71015    | 0          | 1         | 1         |
| 2700023E23Rik    | 1.86418   | 1.78073    | -0.0660726 | 0.861293  | 0.956144  |
| 2700023E23Rik_j1 | 0.504773  | 0.540296   | 0.0981133  | 0.890216  | 0.965187  |
| Rasl11b          | 4.97608   | 4.07322    | -0.288838  | 0.0671113 | 0.309734  |
| Fip1l1           | 6.50516   | 6.76288    | 0          | 1         | 1         |
| Kit              | 2.18655   | 1.87941    | 0          | 1         | 1         |
| Kit_j1           | 0.291901  | 0          | 0          | 1         | 1         |
| Kit_j2           | 0.103082  | 0.142078   | 0          | 1         | 1         |
| Kit_j5           | 8.59897   | 8.22437    | 0          | 1         | 1         |
| XLOC_025307      | 0.118047  | 0.0293087  | -2.00997   | 0.254565  | 1         |
| Srd5a3           | 3.82902   | 3.39754    | -0.172483  | 0.22527   | 0.57244   |
| XLOC_025308      | 0.0795081 | 0.0562633  | -0.498907  | 0.637383  | 1         |
| Tmem165          | 6.54849   | 6.27634    | -0.0612395 | 0.529557  | 0.802537  |
| Gm7271           | 4.79566   | 3.65616    | 0          | 1         | 1         |
| C530008M17Rik_j5 | 2.49435   | 2.50728    | 0          | 1         | 1         |
| C530008M17Rik_j7 | 1.70945   | 0.814665   | 0          | 1         | 1         |
| Paics_j3         | 15.5687   | 15.3382    | 0          | 1         | 1         |
| Paics            | 12.6619   | 9.12869    | 0          | 1         | 1         |
| Srp72            | 31.2612   | 29.2937    | -0.0937823 | 0.295762  | 0.642513  |
| Polr2b           | 2.0885    | 1.70308    | -0.294319  | 0.0994703 | 0.390422  |
| Lphn3_j1         | 1.21502   | 1.14866    | -0.0810245 | 0.665301  | 0.873092  |
| Lphn3_j11        | 3.0447    | 2.84473    | -0.0980087 | 0.477537  | 0.77269   |
| Ythdc1           | 3.02087   | 2.55505    | -0.241611  | 0.193713  | 0.535997  |
| Ythdc1_j2        | 0.374366  | 0.380328   | 0.0227946  | 0.963463  | 0.989786  |
| Smr2             | 7.36818   | 6.76102    | -0.124067  | 0.506584  | 0.789034  |
| Rufy3_j4         | 27.5982   | 24.9778    | 0          | 1         | 1         |
| Mobkl1a          | 2.75859   | 2.25782    | -0.289004  | 0.0340586 | 0.2021    |
| Dck              | 10.8203   | 10.1211    | -0.0963674 | 0.381177  | 0.711771  |
| XLOC_025332      | 0.19878   | 0.00111994 | -7.47161   | 0.842311  | 0.950233  |
| Pf4              | 2.12506   | 4.01504    | 0.917913   | 7.07E-05  | 0.0015966 |
| Mthfd2l          | 1.39142   | 1.21481    | -0.195824  | 0.49353   | 0.781988  |
| Mthfd2l_j1       | 0.395692  | 0.203341   | -0.960477  | 0.0705347 | 0.319224  |
| Mthfd2l_j7       | 0.344901  | 0.588708   | 0.77137    | 0.309859  | 0.654435  |
| Areg             | 0.219601  | 0.633591   | 1.52867    | 0.0003637 | 0.0062485 |
| Parm1            | 109.731   | 79.8151    | -0.459231  | 1.25E-07  | 6.56E-06  |
| Thap6            | 0.55398   | 0.608803   | 0.136142   | 0.457969  | 0.760743  |
| Uso1             | 20.5287   | 17.8212    | 0          | 1         | 1         |
| Art3_j2          | 9.96395   | 10.3667    | 0          | 1         | 1         |
| Art3_j5          | 2.65172   | 4.05412    | 0          | 1         | 1         |
| Stbd1_j1         | 1.52423   | 0.102747   | -3.89092   | 6.45E-05  | 0.0014813 |
| Stbd1            | 9.03682   | 7.31962    | -0.304048  | 0.0130899 | 0.104567  |
| Shroom3_j1       | 2.47381   | 1.86911    | -0.404384  | 0.007905  | 0.0719739 |
| Shroom3          | 1.06553   | 0.742269   | -0.52156   | 0.023203  | 0.15606   |
| Shroom3_j3       | 0.318207  | 0.144258   | -1.14131   | 0.0138538 | 0.108639  |

|                  |           |                 |            |           |           |
|------------------|-----------|-----------------|------------|-----------|-----------|
| Sept11_j1        | 0.0985273 | 0.0331252       | 0          | 1         | 1         |
| Sept11_j2        | 2.6184    | 2.59386         | 0          | 1         | 1         |
| Ccng2            | 8.23149   | 8.57513         | 0.0590049  | 0.606194  | 0.844912  |
| Mrpl1            | 1.81531   | 1.19872         | 0          | 1         | 1         |
| Mrpl1_j2         | 2.00876   | 2.27986         | 0          | 1         | 1         |
| Fras1_j3         | 0.0641434 | 0 -1.79769e+308 | 0.0208493  |           | 1         |
| Fras1_j5         | 0.184643  | 0 -1.79769e+308 | 2.90E-10   | 2.67E-08  |           |
| Anxa3            | 1.15496   | 1.70021         | 0.557868   | 0.0369576 | 0.212772  |
| Bmp2k_j4         | 0.144997  | 0.165066        | 0.187018   | 0.709859  | 0.894313  |
| Gm5560           | 47.4515   | 43.7949         | -0.115692  | 0.238127  | 0.585036  |
| Prdm8_j1         | 0.358766  | 0.468363        | 0          | 1         | 1         |
| Prdm8_j4         | 0.545774  | 0               | 0          | 1         | 1         |
| Prdm8            | 3.67488   | 2.79993         | 0          | 1         | 1         |
| Fgf5_j1          | 0.112785  | 3.00E-05        | -11.8761   | 0.966805  | 1         |
| Fgf5             | 0.219826  | 0.174077        | -0.336636  | 0.543914  | 0.811113  |
| Fgf5             | 0.397353  | 0.190084        | -1.06379   | 0.0357908 | 0.208693  |
| Enoph1           | 2.38609   | 2.34908         | -0.0225487 | 0.864223  | 0.95676   |
| Cops4            | 22.9389   | 20.7922         | 0          | 1         | 1         |
| Cops4_j2         | 1.27232   | 1.59063         | 0          | 1         | 1         |
| Cops4_j3         | 4.48668   | 6.26982         | 0          | 1         | 1         |
| Mrps18c          | 3.24584   | 3.98013         | 0          | 1         | 1         |
| Agpat9_j4        | 1.3041    | 0.922972        | -0.498692  | 0.0373352 | 0.214212  |
| AK020506         | 0.37504   | 0.193665        | -0.95348   | 0.0270891 | 0.173825  |
| Cds1             | 6.1513    | 3.89608         | 0          | 1         | 1         |
| Cds1_j1          | 10.6022   | 9.53258         | 0          | 1         | 1         |
| Cds1_j7          | 10.7655   | 11.0733         | 0          | 1         | 1         |
| Arhgap24_j1      | 0.850459  | 0.448112        | 0          | 1         | 1         |
| Arhgap24_j3      | 2.19902   | 1.34045         | 0          | 1         | 1         |
| Arhgap24_j5      | 3.12569   | 2.21221         | 0          | 1         | 1         |
| Arhgap24_j6      | 3.47443   | 2.12809         | 0          | 1         | 1         |
| Ptpn13_j3        | 0.13901   | 0.0534793       | -1.37813   | 0.0376912 | 0.215494  |
| Ptpn13           | 1.52223   | 1.36043         | -0.162128  | 0.317616  | 0.660907  |
| Ptpn13_j1        | 0.0677405 | 0 -1.79769e+308 | 0.0001128  |           | 1         |
| Ptpn13_j13       | 3.81783   | 4.10918         | 0.106095   | 0.567671  | 0.824883  |
| Aff1_j1          | 0.950141  | 0.662124        | 0          | 1         | 1         |
| Aff1             | 0.925022  | 0.655846        | 0          | 1         | 1         |
| Nudt9            | 26.0122   | 36.5502         | 0.490687   | 2.44E-06  | 9.08E-05  |
| Ibsp             | 3.50263   | 1.85433         | -0.917543  | 1.58E-05  | 0.0004573 |
| Spp1             | 28.8685   | 37.8029         | 0          | 1         | 1         |
| Pkd2_j1          | 0.0859438 | 0.0132476       | 0          | 1         | 1         |
| Pkd2             | 0.515608  | 0.529923        | 0          | 1         | 1         |
| D930016D06Rik_j3 | 0.106775  | 0.0992494       | 0          | 1         | 1         |
| D930016D06Rik_j2 | 0.0938746 | 0.0252618       | 0          | 1         | 1         |
| D930016D06Rik_j5 | 0.156968  | 0.183911        | 0          | 1         | 1         |
| D930016D06Rik_j8 | 0.283296  | 0.264284        | 0          | 1         | 1         |
| Lrrc8b           | 18.9101   | 17.8483         | -0.0833663 | 0.345943  | 0.685212  |
| Lrrc8c_j1        | 0.0720438 | 0               | 0          | 1         | 1         |



|                  |           |                 |            |           |           |
|------------------|-----------|-----------------|------------|-----------|-----------|
| Lrrc8c           | 5.04356   | 3.08802         | 0          | 1         | 1         |
| Zfp326           | 1.1691    | 1.44389         | 0          | 1         | 1         |
| Cdc7             | 0.913833  | 0.838635        | -0.123887  | 0.656612  | 0.869048  |
| Cdc7_j4          | 0.293959  | 0.311206        | 0.0822552  | 0.865088  | 0.957045  |
| Brdt_j3          | 7.53E-05  | 0.0934415       | 10.2763    | 0.919518  | 1         |
| Ephx4            | 8.71306   | 8.93948         | 0.0370107  | 0.803168  | 0.934684  |
| Btbd8_j2         | 0.723429  | 0.713329        | -0.0202848 | 0.936762  | 0.980653  |
| Btbd8_j4         | 0.346542  | 0.56893         | 0.715222   | 0.0378913 | 0.21608   |
| 1700028K03Rik_j1 | 0.214095  | 0.130411        | -0.715182  | 0.236823  | 0.583799  |
| Rpl5_j2          | 1.15617   | 1.43368         | 0          | 1         | 1         |
| Mtf2             | 1.26894   | 1.09546         | 0          | 1         | 1         |
| Dr1              | 12.0647   | 12.5838         | 0.0607735  | 0.565409  | 0.823805  |
| Pigg_j1          | 2.41676   | 2.41365         | 0          | 1         | 1         |
| Pigg_j2          | 0.394766  | 0.293174        | 0          | 1         | 1         |
| AK141638_j1      | 0.253089  | 0.20121         | 0          | 1         | 1         |
| AK141638_j8      | 1.71345   | 1.44061         | 0          | 1         | 1         |
| Pde6b            | 0.220197  | 0.86739         | 1.97789    | 4.82E-09  | 3.59E-07  |
| Pcgf3            | 4.38586   | 4.16874         | -0.0732492 | 0.521019  | 0.798005  |
| Idua_j2          | 1.99144   | 1.99379         | 0          | 1         | 1         |
| XLOC_025401      | 0.182679  | 0.104682        | 0          | 1         | 1         |
| Fgfr1            | 0.716111  | 1.13802         | 0          | 1         | 1         |
| Zfp932_j1        | 2.24406   | 1.99039         | 0          | 1         | 1         |
| Zfp605_j1        | 0.940162  | 1.09667         | 0          | 1         | 1         |
| Chfr             | 7.41781   | 8.45934         | 0.189551   | 0.109582  | 0.41203   |
| Golga3           | 2.07218   | 2.00943         | 0          | 1         | 1         |
| Golga3_j3        | 6.44988   | 6.99376         | 0          | 1         | 1         |
| Ankle2           | 1.67711   | 1.40865         | 0          | 1         | 1         |
| Pole_j2          | 0.0636285 | 0 -1.79769e+308 | 0.0004198  | 0.0004198 | 1         |
| Galnt9           | 14.7141   | 23.0643         | 0.648458   | 2.49E-11  | 2.82E-09  |
| Ddx51            | 1.80107   | 1.76219         | -0.0314881 | 0.820277  | 0.941821  |
| Chek2_j10        | 0.314846  | 0.000122704     | -11.3252   | 0.941581  | 0.982193  |
| Ttc28_j1         | 0.316325  | 0.208899        | -0.598601  | 0.0572834 | 0.280511  |
| Ttc28_j2         | 0.500525  | 0.379142        | -0.400705  | 0.0889528 | 0.365503  |
| Ttc28_j5         | 0.116511  | 0.0405622       | -1.52226   | 0.026222  | 1         |
| Pitpnb           | 5.3115    | 4.36234         | -0.284016  | 0.0862875 | 0.358916  |
| Pitpnb           | 13.5151   | 14.9383         | 0.144446   | 0.18467   | 0.525051  |
| Crybb1           | 2.10353   | 0.663994        | -1.66357   | 5.88E-05  | 0.0013639 |
| Tpst2            | 10.4534   | 9.82718         | -0.0891229 | 0.484294  | 0.776337  |
| Tpst2_j1         | 1.29126   | 1.84939         | 0.518263   | 0.120891  | 0.433025  |
| Tfip11           | 5.09456   | 4.99654         | 0          | 1         | 1         |
| Hps4_j1          | 0.849085  | 0.788787        | 0          | 1         | 1         |
| Wscd2            | 0.283875  | 0.268483        | -0.0804256 | 0.836326  | 0.94752   |
| Wscd2_j3         | 0.0739429 | 0 -1.79769e+308 | 0.0023236  | 0.0023236 | 1         |
| Ficd             | 0.783375  | 0.526663        | -0.572824  | 0.0689577 | 0.314824  |
| Iscu_j4          | 0.65973   | 0.214315        | -1.62215   | 0.0264296 | 0.170807  |
| Usp30            | 2.40655   | 1.93013         | 0          | 1         | 1         |
| Usp30_j6         | 1.09765   | 0.748312        | 0          | 1         | 1         |

|               |           |                 |            |           |           |
|---------------|-----------|-----------------|------------|-----------|-----------|
| Ung           | 0.616282  | 0.344942        | -0.837237  | 0.0468236 | 0.248242  |
| Acacb_j2      | 0.598984  | 0.135529        | -2.14392   | 1.57E-08  | 1.06E-06  |
| Acacb_j9      | 0.306326  | 0.291396        | -0.0720901 | 0.858049  | 0.95492   |
| Ube3b_j2      | 0.869673  | 0.310453        | 0          | 1         | 1         |
| Ube3b_j1      | 6.83676   | 9.4928          | 0          | 1         | 1         |
| Mvk_j3        | 0.158848  | 0.205576        | 0          | 1         | 1         |
| Mvk_j1        | 28.994    | 36.1262         | 0          | 1         | 1         |
| Mvk           | 2.48871   | 3.03835         | 0          | 1         | 1         |
| BC057022      | 2.71989   | 2.21802         | -0.294276  | 0.0924603 | 0.374117  |
| BC057022_j3   | 0.1458    | 0.0761264       | -0.937518  | 0.370639  | 0.703688  |
| Tchp          | 1.98933   | 1.80744         | -0.138336  | 0.484376  | 0.776394  |
| Ankrd13a      | 11.2087   | 16.3649         | 0.545988   | 8.91E-08  | 4.85E-06  |
| Oasl2         | 10.1987   | 11.9193         | 0          | 1         | 1         |
| Oasl1         | 0.313814  | 0.3407          | 0.118592   | 0.801118  | 0.933726  |
| 2210016L21Rik | 28.3225   | 31.6443         | 0.159993   | 0.0802844 | 0.344616  |
| Sppl3_j1      | 0.990933  | 0.57236         | -0.791866  | 0.287514  | 0.635646  |
| Sppl3_j5      | 9.13048   | 8.3571          | -0.127689  | 0.586271  | 0.834297  |
| Sppl3_j7      | 0.446877  | 0.00202488      | -7.7859    | 0.271823  | 0.620639  |
| Srsf9         | 1.98867   | 2.17326         | 0.128059   | 0.387499  | 0.715266  |
| Srsf9_j1      | 1.49097   | 1.66943         | 0.163099   | 0.326797  | 0.669906  |
| Triap1        | 16.8345   | 18.8585         | 0.163793   | 0.140045  | 0.465534  |
| Msi1_j1       | 1.28219   | 1.29622         | 0          | 1         | 1         |
| Msi1          | 2.44696   | 1.54355         | 0          | 1         | 1         |
| Pxn           | 4.88647   | 5.19498         | 0          | 1         | 1         |
| Rplp0_j2      | 0.500062  | 4.85063         | 0          | 1         | 1         |
| Rplp0_j3      | 0.461354  | 1.08346         | 0          | 1         | 1         |
| Gcn1l1        | 2.41761   | 1.45083         | 0          | 1         | 1         |
| Gcn1l1_j6     | 5.5402    | 7.33464         | 0          | 1         | 1         |
| Rab35         | 3.8113    | 4.54747         | 0.254779   | 0.090555  | 0.3696    |
| Cit_j6        | 0.660296  | 0.673509        | 0.0285843  | 0.891787  | 0.965687  |
| Cit_j10       | 0.204607  | 0 -1.79769e+308 |            | 5.44E-11  | 5.83E-09  |
| Taok3         | 2.31516   | 2.13939         | 0          | 1         | 1         |
| Vsig10        | 0.593365  | 0.315297        | -0.912207  | 0.0065801 | 0.0627603 |
| Wsb2_j5       | 0.13118   | 0.046496        | 0          | 1         | 1         |
| AK158973      | 0.145966  | 0.0949767       | -0.619984  | 0.468285  | 0.766949  |
| Ksr2_j1       | 0.665991  | 0.307376        | -1.1155    | 2.20E-06  | 8.27E-05  |
| Nos1_j2       | 7.94694   | 6.0692          | 0          | 1         | 1         |
| Fbxo21        | 1.1044    | 0.281787        | 0          | 1         | 1         |
| Fbxo21_j2     | 4.18749   | 4.56924         | 0          | 1         | 1         |
| Tesc          | 29.2406   | 19.5003         | 0          | 1         | 1         |
| Tesc_j1       | 2.29013   | 0.238584        | 0          | 1         | 1         |
| Hrk           | 0.413083  | 0.937583        | 1.18252    | 5.13E-09  | 3.80E-07  |
| 2410131K14Rik | 4.26567   | 4.58766         | 0          | 1         | 1         |
| Med13l_j7     | 0.591109  | 0.000295716     | 0          | 1         | 1         |
| Tbx3          | 1.94968   | 1.1646          | 0          | 1         | 1         |
| Rbm19         | 2.50902   | 3.08018         | 0.295889   | 0.0394974 | 0.222094  |
| Rbm19_j2      | 0.0989616 | 0.279204        | 1.49638    | 0.122727  | 0.43611   |

|               |           |           |               |           |          |
|---------------|-----------|-----------|---------------|-----------|----------|
| Slc24a6_j3    | 0.793818  | 0.793291  | -0.000958708  | 0.99765   | 0.999228 |
| Slc24a6_j2    | 0.120551  | 0         | -1.79769e+308 | 0.0016124 | 1        |
| Ddx54         | 0.281461  | 0.278867  | -0.0133612    | 0.969961  | 0.99148  |
| Oas1b         | 0.530744  | 0.605465  | 0             | 1         | 1        |
| Naa25         | 5.91288   | 5.81957   | -0.0229475    | 0.800814  | 0.93371  |
| Naa25_j1      | 0.244264  | 0.157315  | -0.634784     | 0.0780701 | 0.338489 |
| Brap          | 15.9959   | 14.81     | -0.11113      | 0.236079  | 0.583364 |
| Atxn2_j1      | 0.268734  | 0.0941181 | 0             | 1         | 1        |
| Fam109a       | 1.39277   | 1.52171   | 0             | 1         | 1        |
| Fam109a       | 0.748684  | 0.799086  | 0             | 1         | 1        |
| Pptc7         | 1.53239   | 1.43253   | -0.0972236    | 0.595035  | 0.838618 |
| Vps29         | 6.82598   | 7.34061   | 0.104865      | 0.512861  | 0.7923   |
| Arpc3         | 94.7247   | 98.0046   | 0             | 1         | 1        |
| Anapc7        | 14.0983   | 15.4686   | 0.13382       | 0.202298  | 0.545897 |
| XLOC_025488   | 0.239464  | 0.188591  | -0.344543     | 0.403635  | 0.726481 |
| P2rx7         | 0.767965  | 0.662433  | 0             | 1         | 1        |
| P2rx4_j1      | 0.260794  | 0.300802  | 0.205901      | 0.822199  | 0.942621 |
| P2rx4         | 10.2644   | 11.3328   | 0.14285       | 0.303046  | 0.648824 |
| Rnf34         | 3.0676    | 3.29184   | 0.101785      | 0.428824  | 0.742566 |
| Orai1_j1      | 6.65153   | 7.22183   | 0.118677      | 0.513839  | 0.793006 |
| Orai1         | 3.0576    | 2.68743   | -0.18617      | 0.356517  | 0.692479 |
| Tmem120b      | 3.45305   | 3.61786   | 0.0672644     | 0.588249  | 0.835413 |
| Psmc9         | 5.45232   | 6.04435   | 0.148716      | 0.282421  | 0.630971 |
| Psmc9_j1      | 3.82888   | 3.44623   | -0.151906     | 0.53967   | 0.808476 |
| XLOC_025500   | 0.156212  | 0.157248  | 0.00953766    | 0.990389  | 0.997044 |
| Wdr66_j3      | 0.0545757 | 0.03118   | -0.807641     | 0.545652  | 1        |
| Bcl7a         | 2.7336    | 2.04534   | -0.418463     | 0.0224729 | 0.15288  |
| XLOC_025501   | 0.146301  | 0.0673111 | -1.12002      | 0.3031    | 0.648824 |
| Mlxip_j1      | 0.600798  | 0.384043  | 0             | 1         | 1        |
| Mlxip         | 2.72801   | 2.42805   | 0             | 1         | 1        |
| Mlxip_j2      | 4.55299   | 4.83949   | 0             | 1         | 1        |
| Kntc1_j3      | 0.909688  | 0.816913  | -0.155191     | 0.698184  | 0.888784 |
| Denr          | 15.994    | 16.0993   | 0.00946564    | 0.930134  | 0.978611 |
| Hip1r_j7      | 0.341277  | 0.449524  | 0.397453      | 0.344234  | 0.684009 |
| Ogfod2        | 2.50563   | 2.60689   | 0.05716       | 0.757115  | 0.916197 |
| Arl6ip4       | 18.7959   | 20.833    | 0.148447      | 0.192577  | 0.534827 |
| Z810006K23Rik | 3.69751   | 3.64296   | 0             | 1         | 1        |
| Setd8         | 13.8109   | 13.2479   | 0             | 1         | 1        |
| Snrnp35       | 0.275028  | 0.25989   | 0             | 1         | 1        |
| Ddx55         | 1.58392   | 1.4047    | -0.173243     | 0.338118  | 0.678562 |
| Ddx55_j1      | 0.333689  | 0.408968  | 0.293486      | 0.384626  | 0.713346 |
| Gtf2h3        | 6.15213   | 6.62253   | 0.106298      | 0.451783  | 0.756943 |
| Tctn2         | 2.41178   | 2.54222   | 0.0759899     | 0.685901  | 0.882922 |
| Atp6v0a2      | 11.2308   | 12.1584   | 0.114488      | 0.237189  | 0.583975 |
| Zfp664        | 6.90644   | 8.05703   | 0             | 1         | 1        |
| Fam101a       | 1.90931   | 2.18262   | 0.193009      | 0.301357  | 0.647692 |
| Bri3bp        | 3.97601   | 3.37861   | -0.234892     | 0.0501322 | 0.258726 |

|               |             |                 |            |           |           |
|---------------|-------------|-----------------|------------|-----------|-----------|
| Bri3bp_j1     | 0.961961    | 0.850131        | -0.178294  | 0.45018   | 0.756025  |
| Aacs          | 26.0836     | 27.4091         | 0          | 1         | 1         |
| Aacs_j3       | 3.13501     | 3.34257         | 0          | 1         | 1         |
| XLOC_025525   | 0.0556605   | 0.0626646       | 0.170998   | 0.86765   | 1         |
| XLOC_025526   | 0.209915    | 0.179669        | -0.22446   | 0.496207  | 0.783139  |
| Tmem132c      | 1.99165     | 1.53373         | -0.376921  | 0.0126781 | 0.102195  |
| Glt1d1        | 1.78225     | 1.46226         | 0          | 1         | 1         |
| Ran           | 10.2116     | 10.5584         | 0          | 1         | 1         |
| Gpr133_j2     | 1.18469     | 2.32921         | 0.975335   | 2.44E-07  | 1.18E-05  |
| Mmp17_j1      | 0.426404    | 0.493678        | 0          | 1         | 1         |
| Mmp17         | 1.00901     | 0.498621        | 0          | 1         | 1         |
| Mrps17_j1     | 0.182798    | 0.229885        | 0.330665   | 0.438311  | 0.748108  |
| Mrps17        | 0.556692    | 0.67868         | 0.285852   | 0.277325  | 0.626363  |
| Mrps17        | 1.00175     | 1.03733         | 0.0503551  | 0.814107  | 0.939438  |
| Gbas          | 33.2963     | 30.9031         | -0.107608  | 0.261549  | 0.610714  |
| Cct6a_j9      | 1.88312     | 3.17607         | 0.754116   | 0.0015479 | 0.0202601 |
| Cct6a_j8      | 37.2929     | 38.1928         | 0.0343992  | 0.717407  | 0.89808   |
| 4930579G22Rik | 0.205086    | 0.275795        | 0.427368   | 0.564524  | 0.823408  |
| Crcp          | 4.04961     | 6.46152         | 0.674089   | 0.0184708 | 0.133461  |
| Crcp_j3       | 23.8001     | 28.8289         | 0.276548   | 0.0076023 | 0.0700847 |
| Tpst1         | 20.7261     | 24.0087         | 0.212106   | 0.0359455 | 0.209145  |
| Tpst1_j1      | 0.184148    | 0 -1.79769e+308 |            | 0.0083536 | 0.0749377 |
| Kctd7         | 4.87314     | 5.11564         | 0.0700618  | 0.517108  | 0.795422  |
| Rabgef1       | 0.000523413 | 0.959199        | 0          | 1         | 1         |
| Rabgef1_j1    | 1.57647     | 0.849127        | 0          | 1         | 1         |
| Gm15920       | 55.742      | 51.231          | 0          | 1         | 1         |
| 0610007L01Rik | 0.430541    | 0.457944        | 0.0890215  | 0.72285   | 0.901299  |
| Tyw1_j2       | 1.33864     | 1.00872         | -0.408249  | 0.304055  | 0.649781  |
| Tyw1_j3       | 0.820587    | 0.730817        | -0.167146  | 0.70168   | 0.890429  |
| Caln1_j1      | 0.246495    | 0.119106        | 0          | 1         | 1         |
| Caln1_j2      | 1.06263     | 0.687985        | 0          | 1         | 1         |
| Caln1         | 0.892843    | 0.667778        | 0          | 1         | 1         |
| Gatsl2        | 4.75403     | 3.51374         | 0          | 1         | 1         |
| Gatsl2_j2     | 5.20498     | 5.65822         | 0          | 1         | 1         |
| Gtf2ird2_j1   | 0.0812226   | 0.000120809     | 0          | 1         | 1         |
| Gtf2ird2_j6   | 0.870084    | 0.126892        | 0          | 1         | 1         |
| Rfc2          | 14.8781     | 15.0111         | 0.0128407  | 0.91682   | 0.97399   |
| Wbscr27_j3    | 2.09508     | 1.28528         | -0.704919  | 0.0429766 | 0.234987  |
| Wbscr27_j6    | 0.374899    | 0.246205        | -0.60664   | 0.489598  | 0.779561  |
| Abhd11        | 1.3738      | 1.72875         | 0.331554   | 0.294672  | 0.641359  |
| Abhd11_j3     | 2.16295     | 2.49892         | 0.208308   | 0.348803  | 0.686741  |
| Abhd11_j4     | 7.16672     | 7.06047         | -0.0215484 | 0.900644  | 0.968396  |
| Stx1a         | 19.0186     | 23.8629         | 0.32736    | 0.0012121 | 0.0166759 |
| Tbl2          | 3.75736     | 3.64095         | -0.0454007 | 0.683199  | 0.881383  |
| Bcl7b         | 17.1574     | 15.9378         | 0          | 1         | 1         |
| Baz1b         | 1.92047     | 1.84965         | 0          | 1         | 1         |
| Nsun5_j1      | 0.312259    | 0.248364        | 0          | 1         | 1         |

|                  |           |           |            |           |           |
|------------------|-----------|-----------|------------|-----------|-----------|
| Rhbdd2           | 2.38519   | 2.37638   | 0          | 1         | 1         |
| Rhbdd2           | 2.48214   | 2.00599   | 0          | 1         | 1         |
| Por_j3           | 0.117694  | 0         | 0          | 1         | 1         |
| Por              | 3.08244   | 3.26356   | 0          | 1         | 1         |
| Mdh2_j1          | 47.0718   | 67.9192   | 0.528954   | 1.17E-06  | 4.73E-05  |
| Mdh2             | 201.222   | 195.545   | -0.0412852 | 0.631827  | 0.856815  |
| 2900083111Rik_j2 | 0.092241  | 0.0422826 | -1.12534   | 0.375314  | 1         |
| 2900083111Rik_j1 | 0.245235  | 0.106263  | -1.20653   | 0.126052  | 0.442123  |
| Hspb1            | 57.3508   | 114.932   | 1.0029     | 0         | 0         |
| Zp3_j3           | 0.330888  | 0.517006  | 0.643837   | 0.205847  | 0.550382  |
| Dtx2             | 3.52715   | 3.32544   | 0          | 1         | 1         |
| Dtx2             | 1.80119   | 1.61586   | 0          | 1         | 1         |
| Rasa4            | 6.42304   | 6.66634   | 0.0536394  | 0.697169  | 0.888506  |
| Polr2j           | 3.43978   | 3.72171   | 0.113646   | 0.330657  | 0.672484  |
| Alkbh4           | 0.395373  | 0.216895  | -0.866219  | 0.208027  | 0.55225   |
| Alkbh4           | 3.43213   | 3.48689   | 0.0228388  | 0.89561   | 0.96693   |
| Alkbh4_j2        | 0.16047   | 0.333778  | 1.05658    | 0.108085  | 0.40873   |
| Rabl5            | 5.24117   | 5.37443   | 0.0362218  | 0.759998  | 0.917326  |
| Fis1             | 48.0697   | 44.6187   | -0.107479  | 0.315141  | 0.659106  |
| Fis1_j2          | 0.232084  | 0.0803255 | -1.53072   | 0.433466  | 0.744803  |
| Cldn15           | 0.082324  | 0.120355  | 0.547909   | 0.529911  | 1         |
| Plod3_j2         | 6.78301   | 9.88483   | 0          | 1         | 1         |
| Vgf_j4           | 67.5159   | 133.239   | 0.980716   | 0         | 0         |
| Ache             | 1.57031   | 1.51084   | 0          | 1         | 1         |
| Ache             | 19.7761   | 9.31072   | 0          | 1         | 1         |
| Ephb4            | 1.33239   | 1.43088   | 0.102887   | 0.578482  | 0.830421  |
| Gigyf1_j4        | 2.46637   | 2.68689   | 0.12355    | 0.298666  | 0.645356  |
| Actl6b           | 4.7256    | 5.21474   | 0          | 1         | 1         |
| Actl6b_j1        | 14.8087   | 14.918    | 0          | 1         | 1         |
| Actl6b_j3        | 3.98499   | 2.99783   | 0          | 1         | 1         |
| Trfr2_j2         | 0.146144  | 0.0240909 | -2.60083   | 0.0421195 | 0.231941  |
| Trfr2_j5         | 0.0572075 | 0.0580457 | 0.0209853  | 0.984768  | 1         |
| Lrch4_j3         | 0.496047  | 0.25327   | 0          | 1         | 1         |
| Lrch4_j2         | 0.965843  | 0.322422  | 0          | 1         | 1         |
| Lrch4_j1         | 2.24723   | 3.30055   | 0          | 1         | 1         |
| Tsc22d4          | 7.69296   | 7.96367   | 0.0498944  | 0.680404  | 0.879921  |
| Tsc22d4_j1       | 6.67996   | 8.27614   | 0.309118   | 0.174784  | 0.513075  |
| Tsc22d4_j2       | 25.9987   | 28.2602   | 0.12033    | 0.301903  | 0.648067  |
| 2010007H12Rik    | 5.43362   | 5.2071    | 0          | 1         | 1         |
| 2010007H12Rik_j2 | 7.76719   | 6.90602   | 0          | 1         | 1         |
| Zcwpw1           | 3.63037   | 3.28741   | -0.143163  | 0.361054  | 0.695733  |
| Azgp1            | 0.14089   | 0.104858  | -0.426133  | 0.496922  | 0.783617  |
| Zkscan1          | 3.74929   | 2.82      | 0          | 1         | 1         |
| Zkscan1_j1       | 2.095     | 2.49776   | 0          | 1         | 1         |
| Zscan21          | 3.68056   | 2.59421   | -0.504631  | 0.0168894 | 0.125161  |
| Zscan21          | 5.13624   | 6.76952   | 0.398339   | 0.0077288 | 0.0708994 |
| Cops6            | 65.6511   | 68.2914   | 0.0568856  | 0.542598  | 0.810405  |

|                  |           |           |            |           |           |
|------------------|-----------|-----------|------------|-----------|-----------|
| Ap4m1_j1         | 3.32551   | 3.39873   | 0          | 1         | 1         |
| Cnpy4            | 1.70968   | 1.86725   | 0.12719    | 0.484196  | 0.776305  |
| BC055004_j1      | 0.124847  | 0.0730674 | -0.772859  | 0.502182  | 1         |
| 0910001L09Rik_j4 | 0.604658  | 0.610196  | 0.0131545  | 0.959855  | 0.988566  |
| Stag3_j1         | 0.148649  | 0.0732187 | -1.02162   | 0.308647  | 0.653546  |
| Stag3_j2         | 0.173148  | 0.107007  | -0.694305  | 0.318668  | 0.662021  |
| Zfp157           | 0.61873   | 0.702967  | 0          | 1         | 1         |
| Zfp157_j2        | 0.458133  | 0.51935   | 0          | 1         | 1         |
| Zfp157_j3        | 2.07858   | 2.16746   | 0          | 1         | 1         |
| A430033K04Rik    | 0.368865  | 0.421734  | 0          | 1         | 1         |
| Fam20c           | 3.05635   | 2.46715   | -0.308963  | 0.0514137 | 0.262862  |
| Heatr2           | 1.94467   | 2.06301   | 0.0852247  | 0.645813  | 0.863418  |
| Heatr2_j1        | 0.933129  | 0.8807    | -0.0834261 | 0.816526  | 0.940275  |
| Sun1_j11         | 3.22759   | 2.4814    | -0.3793    | 0.0340947 | 0.20224   |
| Sun1_j10         | 3.31539   | 4.06765   | 0.295017   | 0.0629169 | 0.296995  |
| Sun1_j14         | 0.655191  | 0.634572  | -0.0461313 | 0.91317   | 0.972756  |
| Get4_j1          | 2.9977    | 3.50436   | 0          | 1         | 1         |
| Gpr146           | 1.52436   | 1.98433   | 0          | 1         | 1         |
| Gpr30_j1         | 0.186797  | 0.20325   | 0          | 1         | 1         |
| Gpr30            | 0.332045  | 0.409059  | 0          | 1         | 1         |
| Mafk             | 4.26887   | 5.62629   | 0.39833    | 0.0038266 | 0.0415662 |
| Mafk_j1          | 0.800584  | 0.604831  | -0.404521  | 0.289859  | 0.637188  |
| XLOC_025613      | 0.186434  | 0.144014  | -0.372455  | 0.406764  | 0.727764  |
| Elfn1_j1         | 1.58767   | 1.33204   | -0.253281  | 0.211856  | 0.556645  |
| Nudt1_j1         | 0.757805  | 0.719956  | -0.0739179 | 0.857707  | 0.954916  |
| Nudt1            | 2.33581   | 2.39509   | 0.0361582  | 0.876254  | 0.960645  |
| Nudt1_j2         | 0.595488  | 0.638608  | 0.100858   | 0.828287  | 0.944579  |
| Eif3b            | 39.0936   | 47.263    | 0.273779   | 0.0019172 | 0.0241522 |
| Eif3b_j3         | 5.42809   | 12.739    | 1.23074    | 9.74E-09  | 6.85E-07  |
| XLOC_025616      | 0.744611  | 1.11024   | 0.576313   | 0.0757644 | 0.332486  |
| Chst12           | 3.77256   | 3.06387   | 0          | 1         | 1         |
| Chst12_j4        | 0.751507  | 0.376644  | 0          | 1         | 1         |
| XLOC_025618      | 0.250625  | 0.163456  | -0.616627  | 0.454764  | 0.758773  |
| Lfng             | 0.629006  | 0.7242    | 0.203315   | 0.490211  | 0.77988   |
| AA881470_j1      | 0.212767  | 0.141365  | -0.589846  | 0.446117  | 0.75332   |
| Amz1_j2          | 0.0959254 | 0.0471404 | -1.02495   | 0.435784  | 1         |
| Amz1             | 0.314491  | 0.31049   | -0.0184703 | 0.971352  | 0.991962  |
| Amz1_j5          | 0.761044  | 1.36697   | 0.84493    | 0.0015592 | 0.0203808 |
| Sdk1_j2          | 0.596     | 0.917473  | 0          | 1         | 1         |
| Foxk1            | 3.60384   | 3.46755   | 0          | 1         | 1         |
| Wipi2            | 13.4253   | 13.5735   | 0          | 1         | 1         |
| Slc29a4          | 17.0238   | 17.4121   | 0          | 1         | 1         |
| Fscn1            | 4.35657   | 11.6126   | 0          | 1         | 1         |
| Fscn1_j1         | 2.75432   | 0.318885  | 0          | 1         | 1         |
| Zfp12            | 0.346709  | 0.353616  | 0.0284554  | 0.939575  | 0.981578  |
| Grid2ip          | 0.420687  | 0.444361  | 0          | 1         | 1         |
| Grid2ip          | 0.853536  | 0.189839  | 0          | 1         | 1         |

|               |           |                 |            |           |           |
|---------------|-----------|-----------------|------------|-----------|-----------|
| Kdelr2        | 19.5063   | 19.9523         | 0.0326131  | 0.752713  | 0.914482  |
| Daglb         | 3.4833    | 4.33079         | 0.314175   | 0.0291825 | 0.182289  |
| 2810453I06Rik | 5.45283   | 5.21346         | 0          | 1         | 1         |
| Cyth3         | 11.3917   | 11.266          | 0          | 1         | 1         |
| D130017N08Rik | 2.27608   | 2.21562         | -0.0388379 | 0.782638  | 0.926627  |
| Eif2ak1       | 17.698    | 17.4781         | 0          | 1         | 1         |
| Rsph10b2_j2   | 0.069761  | 0 -1.79769e+308 | 0.0059951  |           | 1         |
| Rsph10b2_j1   | 0.10902   | 0.0901504       | -0.274192  | 0.7143    | 1         |
| Rsph10b2_j9   | 0.20534   | 0.170182        | -0.270938  | 0.761897  | 0.918069  |
| Lmtk2_j2      | 0.689075  | 0.720766        | 0          | 1         | 1         |
| Lmtk2         | 0.304073  | 0.344172        | 0          | 1         | 1         |
| Bri3          | 12.8681   | 12.8939         | 0.00289195 | 0.979742  | 0.994006  |
| Nptx2         | 10.5988   | 9.53392         | -0.152752  | 0.177131  | 0.516263  |
| Trrap_j2      | 0.307191  | 0.13282         | -1.20966   | 0.0009669 | 0.0139194 |
| Trrap_j12     | 0.185279  | 0.303395        | 0.711499   | 0.131255  | 0.451034  |
| Arpc1a        | 104.18    | 116.67          | 0.163359   | 0.057508  | 0.280989  |
| Arpc1b        | 10.6813   | 13.0416         | 0          | 1         | 1         |
| Arpc1b_j2     | 5.46325   | 8.11892         | 0          | 1         | 1         |
| Cpsf4         | 1.19579   | 1.0756          | -0.15283   | 0.641697  | 0.861896  |
| Cpsf4         | 1.28977   | 1.49821         | 0.216116   | 0.449416  | 0.755499  |
| Zkscan5       | 2.31045   | 1.59419         | 0          | 1         | 1         |
| Zfp655        | 6.06161   | 6.85743         | 0.177967   | 0.100201  | 0.391868  |
| Zfp498_j3     | 2.96058   | 2.61624         | -0.178384  | 0.308852  | 0.653697  |
| Cdk8_j1       | 0.393446  | 0.080299        | -2.29271   | 0.171098  | 0.507955  |
| Cdk8_j8       | 0.177001  | 0.0923202       | -0.939037  | 0.333537  | 0.67451   |
| Cdk8_j12      | 0.69633   | 0.636798        | -0.128934  | 0.750665  | 0.913496  |
| Wasf3         | 8.99375   | 7.71611         | 0          | 1         | 1         |
| Wasf3_j2      | 1.38801   | 0.593169        | 0          | 1         | 1         |
| Wasf3_j3      | 2.68917   | 1.888           | 0          | 1         | 1         |
| XLOC_025657   | 0.110901  | 0.106927        | 0          | 1         | 1         |
| Rasl11a       | 2.48197   | 3.90602         | 0.654215   | 0.0011328 | 0.015803  |
| Gtf3a         | 12.3217   | 14.7812         | 0          | 1         | 1         |
| Polr1d_j1     | 0.551143  | 0.316759        | 0          | 1         | 1         |
| Polr1d        | 1.51281   | 1.53166         | 0          | 1         | 1         |
| Polr1d_j3     | 12.2264   | 13.5492         | 0.148212   | 0.330232  | 0.672176  |
| Pan3_j3       | 0.052727  | 0.0250187       | 0          | 1         | 1         |
| Pan3_j8       | 0.318291  | 0.226069        | 0          | 1         | 1         |
| Pomp          | 13.1059   | 14.1826         | 0          | 1         | 1         |
| Pomp_j3       | 8.11732   | 13.5643         | 0          | 1         | 1         |
| Mtus2         | 3.67758   | 6.28802         | 0          | 1         | 1         |
| AK087624_j1   | 0.0994598 | 0.0505319       | -0.976919  | 0.324066  | 1         |
| Uspl1         | 0.247212  | 0.215249        | 0          | 1         | 1         |
| Uspl1         | 6.87056   | 7.15299         | 0          | 1         | 1         |
| Alox5ap       | 0.612297  | 0.789312        | 0.366365   | 0.473586  | 0.770096  |
| Alox5ap_j5    | 0.754326  | 0.842902        | 0.160177   | 0.800593  | 0.93355   |
| Alox5ap_j6    | 0.392294  | 0.413462        | 0.0758204  | 0.929073  | 0.9783    |
| AK138849_j1   | 0.057257  | 0 -1.79769e+308 | 0.0076897  |           | 1         |

|                  |           |            |            |           |           |
|------------------|-----------|------------|------------|-----------|-----------|
| 633040615Rik     | 0.41231   | 0.418166   | 0.0203459  | 0.956111  | 0.987465  |
| B3galtl          | 2.15665   | 1.9056     | 0          | 1         | 1         |
| B3galtl_j2       | 0.324706  | 1.3518     | 0          | 1         | 1         |
| B3galtl          | 7.50064   | 6.36876    | 0          | 1         | 1         |
| Fry_j8           | 0.0875042 | 0.121119   | 0          | 1         | 1         |
| Fry_j7           | 0.187909  | 0.0224833  | 0          | 1         | 1         |
| Brca2_j1         | 0.202301  | 0.0642176  | -1.65546   | 0.0291465 | 0.182103  |
| Brca2_j2         | 0.13464   | 0.0230233  | -2.54794   | 0.102905  | 1         |
| Pds5b_j8         | 2.55549   | 2.55575    | 0          | 1         | 1         |
| Pds5b_j7         | 0.476189  | 0.413817   | 0          | 1         | 1         |
| Kl_j1            | 0.20515   | 0.0478667  | -2.09958   | 0.0134775 | 0.106632  |
| Gatad1           | 24.8022   | 25.2465    | 0.0256182  | 0.789144  | 0.929653  |
| Ankib1           | 1.71312   | 1.65377    | 0          | 1         | 1         |
| Mterf_j1         | 0.321254  | 0.0180493  | -4.1537    | 0.0937477 | 0.377256  |
| Cyp51            | 24.6849   | 25.1548    | 0          | 1         | 1         |
| Cdk14_j7         | 6.96801   | 9.27379    | 0          | 1         | 1         |
| Cdk14_j8         | 0.652313  | 0.10219    | 0          | 1         | 1         |
| Cdk14            | 27.3959   | 21.1772    | 0          | 1         | 1         |
| Cldn12           | 1.72191   | 1.54015    | 0          | 1         | 1         |
| Gtpbp10_j2       | 0.400768  | 0.309068   | -0.374844  | 0.508116  | 0.790069  |
| Gtpbp10_j1       | 1.06508   | 1.48473    | 0.479243   | 0.0715003 | 0.321474  |
| A330021E22Rik_j3 | 0.455881  | 0.320802   | -0.506975  | 0.222845  | 0.569878  |
| A330021E22Rik_j2 | 0.132122  | 0.123446   | -0.0979833 | 0.890794  | 1         |
| Steap2_j1        | 0.262648  | 0          | 0          | 1         | 1         |
| Steap2           | 0.0734416 | 0.0485155  | 0          | 1         | 1         |
| Steap1           | 0.84147   | 1.08953    | 0.372728   | 0.0591645 | 0.285901  |
| Dbf4             | 0.652965  | 0.690956   | 0.0815874  | 0.742426  | 0.909901  |
| Rundc3b          | 1.63414   | 1.50112    | 0          | 1         | 1         |
| Rundc3b_j3       | 1.40745   | 1.58327    | 0          | 1         | 1         |
| Crot             | 5.21922   | 4.27883    | 0          | 1         | 1         |
| Dmtf1            | 4.92641   | 3.89637    | 0          | 1         | 1         |
| Grm3_j1          | 0.11839   | 0.0389143  | 0          | 1         | 1         |
| Gm5152_j2        | 0.0272603 | 0.139376   | 2.35411    | 0.502758  | 1         |
| Speer4c_j2       | 0.0355291 | 0.381707   | 3.42539    | 0.0190979 | 0.136495  |
| Gm3510           | 0.193286  | 0.44063    | 1.18883    | 0.0083739 | 0.0750531 |
| Cd36             | 0.103839  | 0.235116   | 1.17902    | 0.0850987 | 0.356095  |
| Cd36_j2          | 0.193985  | 0.113668   | -0.771116  | 0.336055  | 0.676511  |
| Cd36             | 2.38E-05  | 0.152013   | 12.6428    | 0.96928   | 1         |
| Cd36_j3          | 0.338293  | 0.00028898 | -10.1931   | 0.745707  | 0.911379  |
| Gnai1_j2         | 0.439336  | 0          | 0          | 1         | 1         |
| Gnai1            | 24.4963   | 15.1961    | 0          | 1         | 1         |
| Phtf2_j3         | 1.83035   | 1.95496    | 0.0950138  | 0.695327  | 0.887572  |
| Phtf2_j4         | 0.487156  | 0.43442    | -0.165294  | 0.677434  | 0.878715  |
| Phtf2            | 3.12782   | 2.61145    | -0.260303  | 0.0832997 | 0.351865  |
| Rsb1l_j2         | 1.60525   | 1.17962    | 0          | 1         | 1         |
| Rsb1l            | 0.207609  | 0.42424    | 0          | 1         | 1         |
| Ptpn12_j3        | 0.410561  | 0          | 0          | 1         | 1         |



|                    |           |                        |             |           |           |
|--------------------|-----------|------------------------|-------------|-----------|-----------|
| Ptpn12             | 4.10186   | 3.93288                | 0           | 1         | 1         |
| Napepld_j1         | 0.307934  | 0.239428               | -0.363029   | 0.239589  | 0.586975  |
| Dnajc2             | 4.0012    | 4.46596                | 0.158537    | 0.150532  | 0.481009  |
| Reln_j2            | 0.110252  | 0.0354541              | -1.63679    | 0.0213558 | 1         |
| Orc5_j5            | 22.5221   | 25.2203                | 0.163239    | 0.213784  | 0.558982  |
| AK017143_j2        | 0.208921  | 0.114169               | 0           | 1         | 1         |
| Srpk2_j4           | 8.41762   | 7.46136                | 0           | 1         | 1         |
| Srpk2_j2           | 0.497979  | 0.446949               | 0           | 1         | 1         |
| ENSMUSG00000073777 | 3.60964   | 5.99965                | 0.733024    | 1.22E-07  | 6.38E-06  |
| Tomm7              | 12.1278   | 12.6889                | 0.0652513   | 0.587912  | 0.835176  |
| Fam126a            | 0.887295  | 0.739376               | 0           | 1         | 1         |
| XLOC_025735        | 0.0700139 | 0 -1.79769e+308        | 0.0178605   |           | 1         |
| XLOC_025735        | 0.0604216 | 0 -1.79769e+308        | 0.0905305   |           | 1         |
| Kcni2              | 9.46962   | 7.55179                | 0           | 1         | 1         |
| Kcni2              | 13.1814   | 7.52281                | 0           | 1         | 1         |
| Kcni2_j3           | 1.20237   | 0.573036               | 0           | 1         | 1         |
| Cdk5               | 54.0135   | 53.8523                | -0.00431437 | 0.961097  | 0.988976  |
| Tmub1_j3           | 0.730647  | 0.764499               | 0.0653405   | 0.895807  | 0.96693   |
| Tmub1              | 1.22483   | 1.57671                | 0.364333    | 0.171098  | 0.507955  |
| Gbx1_j2            | 0.0950749 | 0                      | 0           | 1         | 1         |
| Gbx1               | 0.411774  | 0.342226               | 0           | 1         | 1         |
| Abcf2              | 19.0756   | 17.6057                | -0.11569    | 0.261656  | 0.610795  |
| Abcf2_j4           | 8.93677   | 6.95736                | -0.361214   | 0.0002102 | 0.0039995 |
| Rheb_j1            | 59.8922   | 59.1476                | 0           | 1         | 1         |
| Rheb               | 63.3392   | 65.0114                | 0           | 1         | 1         |
| Prkag2_j4          | 2.81138   | 2.31257                | 0           | 1         | 1         |
| Prkag2_j2          | 9.88808   | 10.2199                | 0           | 1         | 1         |
| Mll3_j14           | 0.111677  | 0.0548669              | -1.02532    | 0.0564779 | 1         |
| Xrcc2              | 1.89794   | 1.28266                | -0.565298   | 0.006487  | 0.0621152 |
| Paxip1_j7          | 1.77155   | 1.52742                | 0           | 1         | 1         |
| Paxip1             | 4.14423   | 3.86347                | 0           | 1         | 1         |
| Shh                | 8.18046   | 6.48327                | -0.335459   | 0.0052928 | 0.0528825 |
| Lmbr1              | 0.758135  | 0.640612               | -0.243004   | 0.374235  | 0.706986  |
| Tyms_j1            | 0.11948   | 0.0322734              | -1.88835    | 0.302872  | 1         |
| Hadha              | 13.136    | 11.9365                | 0           | 1         | 1         |
| Gm16288            | 0.475846  | 0.351058               | 0           | 1         | 1         |
| Ost4               | 0.564834  | 0.472964               | -0.256097   | 0.205515  | 0.549925  |
| Ost4               | 0         | 0.0485303 1.79769e+308 | 0.0055661   |           | 1         |
| Cgref1             | 11.2568   | 19.0866                | 0.761765    | 6.70E-11  | 7.07E-09  |
| Preb               | 1.80447   | 2.0363                 | 0.174377    | 0.308306  | 0.653251  |
| Preb               | 11.2197   | 11.5119                | 0.0370954   | 0.696549  | 0.888142  |
| Slc5a6_j2          | 0.23846   | 0.220786               | -0.111096   | 0.870073  | 0.958679  |
| Ucn                | 0.730936  | 4.27321                | 2.5475      | 2.92E-13  | 4.58E-11  |
| Gtf3c2_j10         | 3.62964   | 7.30926                | 0           | 1         | 1         |
| Gtf3c2_j11         | 2.18871   | 3.30859                | 0           | 1         | 1         |
| Gtf3c2             | 0.575372  | 0.241322               | 0           | 1         | 1         |
| Eif2b4             | 3.66489   | 3.45087                | 0           | 1         | 1         |

|                  |           |                 |            |           |           |
|------------------|-----------|-----------------|------------|-----------|-----------|
| Ppm1g_j5         | 0.342303  | 0.090117        | 0          | 1         | 1         |
| Ppm1g_j3         | 0.266274  | 0.0492695       | 0          | 1         | 1         |
| Ift172_j7        | 1.97012   | 1.15171         | 0          | 1         | 1         |
| Ift172_j9        | 2.46436   | 1.99966         | 0          | 1         | 1         |
| Fndc4            | 5.06337   | 5.63579         | 0          | 1         | 1         |
| Fndc4            | 2.94195   | 2.85825         | 0          | 1         | 1         |
| Supt7l           | 0.339024  | 0.379366        | 0          | 1         | 1         |
| AK036733_j1      | 0.0906337 | 0.0786743       | -0.204155  | 0.80844   | 1         |
| XLOC_025779      | 0.09475   | 0.0899868       | -0.0744134 | 0.941203  | 1         |
| Pisd_j4          | 2.76428   | 3.58971         | 0          | 1         | 1         |
| Pisd             | 3.82676   | 3.88806         | 0          | 1         | 1         |
| Pisd             | 2.16134   | 1.87397         | 0          | 1         | 1         |
| C330019G07Rik_j5 | 0.212587  | 0.066789        | 0          | 1         | 1         |
| C330019G07Rik    | 0.86564   | 0.698798        | 0          | 1         | 1         |
| Spon2            | 0.311188  | 0.344423        | 0.146395   | 0.755245  | 0.915526  |
| Spon2_j1         | 0.179602  | 0 -1.79769e+308 | 0.0006384  | 0.0099691 |           |
| Ctbp1_j2         | 0.131942  | 0               | 0          | 1         | 1         |
| Ctbp1            | 12.3432   | 17.4675         | 0          | 1         | 1         |
| Ctbp1            | 7.37405   | 11.7554         | 0          | 1         | 1         |
| Fam53a_j4        | 0.665153  | 0.48512         | -0.455344  | 0.41347   | 0.732276  |
| Fam53a           | 1.97523   | 2.56011         | 0.374185   | 0.0760052 | 0.332943  |
| Slbp             | 7.36404   | 8.03055         | 0.125001   | 0.360823  | 0.695583  |
| Tmem129_j1       | 9.10101   | 9.98963         | 0          | 1         | 1         |
| Tmem129          | 1.57213   | 1.39824         | 0          | 1         | 1         |
| Letm1_j3         | 16.8819   | 18.2743         | 0          | 1         | 1         |
| Letm1            | 4.43259   | 3.8933          | 0          | 1         | 1         |
| Whsc2_j1         | 2.45104   | 3.2578          | 0          | 1         | 1         |
| Whsc2            | 0.872305  | 0.708452        | 0          | 1         | 1         |
| Poln_j1          | 0.069734  | 0 -1.79769e+308 | 0.0412075  |           | 1         |
| Poln_j2          | 0.0613776 | 0.1188          | 0.952746   | 0.269383  | 1         |
| Poln_j3          | 0.0910005 | 0.0597413       | -0.607145  | 0.512438  | 1         |
| Poln_j4          | 0.226885  | 0.149538        | -0.601453  | 0.309601  | 0.65423   |
| Poln_j5          | 0.0894051 | 0.0828303       | -0.110199  | 0.901219  | 1         |
| Poln_j8          | 0.161119  | 0 -1.79769e+308 | 0.0028831  | 0.0333469 |           |
| Mxd4_j1          | 8.71207   | 4.49115         | 0          | 1         | 1         |
| Mxd4             | 3.25472   | 3.04406         | 0          | 1         | 1         |
| Zfyve28_j4       | 5.72649   | 7.08516         | 0          | 1         | 1         |
| Tnip2_j1         | 0.0971496 | 0.0759445       | -0.355264  | 0.599127  | 1         |
| Tnip2_j2         | 0.272785  | 0.360351        | 0.401637   | 0.215895  | 0.561625  |
| Mfsd10           | 3.60986   | 4.30621         | 0          | 1         | 1         |
| Nop14            | 9.62038   | 11.4449         | 0.25054    | 0.0197571 | 0.139688  |
| Lrpap1           | 64.3007   | 61.3635         | -0.0674532 | 0.433117  | 0.744598  |
| 2310079F23Rik_j2 | 0.46016   | 0.443681        | -0.0526115 | 0.843356  | 0.950448  |
| Htra3_j1         | 0.914802  | 1.05103         | 0.200269   | 0.591     | 0.836786  |
| Htra3_j2         | 0.562457  | 0.244968        | -1.19915   | 0.0378401 | 0.21594   |
| Htra3            | 0.113821  | 0.542624        | 2.25319    | 0.0002519 | 0.0046503 |
| Sh3tc1_j5        | 0.0854001 | 0 -1.79769e+308 | 0.0505905  |           | 1         |

|              |          |             |               |           |          |
|--------------|----------|-------------|---------------|-----------|----------|
| Sh3tc1_j6    | 0.110256 | 0           | -1.79769e+308 | 0.0004465 | 1        |
| Sorcs2_j3    | 0.586804 | 0           | 0             | 1         | 1        |
| Sorcs2       | 1.60751  | 1.3073      | 0             | 1         | 1        |
| Sorcs2_j4    | 0.932919 | 1.05145     | 0             | 1         | 1        |
| AK144870_j2  | 0.524478 | 0.587443    | 0.163567      | 0.737636  | 0.907523 |
| AK043305     | 0.791514 | 0.477966    | -0.727707     | 0.208373  | 0.552338 |
| Tada2b       | 2.90634  | 2.52122     | -0.205079     | 0.171819  | 0.50891  |
| Tbc1d14_j1   | 0.290297 | 0.138424    | 0             | 1         | 1        |
| Tbc1d14      | 3.1234   | 3.4767      | 0             | 1         | 1        |
| Tbc1d14      | 2.77634  | 2.41748     | 0             | 1         | 1        |
| D5Ert579e_j1 | 2.23832  | 1.91483     | -0.225198     | 0.183598  | 0.52417  |
| D5Ert579e_j2 | 0.261116 | 0.181985    | -0.520871     | 0.411695  | 0.730802 |
| XLOC_025812  | 0.188202 | 0.0811148   | -1.21424      | 0.274905  | 0.623903 |
| Mrfap1       | 51.0116  | 55.4476     | 0.120299      | 0.19705   | 0.53985  |
| Man2b2       | 9.45499  | 10.4022     | 0.137741      | 0.206874  | 0.551484 |
| Wfs1         | 16.0938  | 16.9066     | 0             | 1         | 1        |
| Nsg1         | 7.95816  | 12.2466     | 0.621874      | 2.15E-09  | 1.71E-07 |
| Zbtb49_j5    | 0.165297 | 0           | -1.79769e+308 | 8.38E-07  | 3.55E-05 |
| Slc2a9       | 0.24397  | 0.226719    | -0.105794     | 0.826334  | 0.944003 |
| Slc2a9       | 0.314249 | 0.220557    | -0.510761     | 0.326192  | 0.669409 |
| Wdr1_j6      | 0.137054 | 0.146561    | 0             | 1         | 1        |
| Zfp518b      | 0.722237 | 0.397567    | 0             | 1         | 1        |
| Zfp518b_j5   | 0.213021 | 1.11162     | 0             | 1         | 1        |
| Zfp518b      | 1.01904  | 0.596437    | 0             | 1         | 1        |
| Hs3st1       | 1.22723  | 0.944752    | -0.377403     | 0.0164327 | 0.122727 |
| XLOC_025828  | 0.188831 | 0.000258732 | -9.51142      | 0.787143  | 0.928981 |
| Rab28        | 9.53755  | 9.64415     | 0.0160344     | 0.912566  | 0.972469 |
| Rab28_j2     | 0.892076 | 0.393848    | -1.17953      | 0.0281995 | 0.178204 |
| Bod1l_j6     | 0.921766 | 0.985528    | 0.096497      | 0.591499  | 0.837104 |
| Bod1l_j8     | 0.286717 | 0.274283    | -0.0639631    | 0.832041  | 0.945814 |
| Fbx15        | 15.4192  | 13.7556     | -0.164706     | 0.105861  | 0.403985 |
| Prom1_j7     | 0.211739 | 4.12E-05    | -12.3279      | 0.933488  | 0.979817 |
| Prom1        | 1.9782   | 1.77822     | -0.153757     | 0.421685  | 0.737856 |
| Tapt1        | 5.98488  | 4.48365     | 0             | 1         | 1        |
| Ldb2_j3      | 8.74807  | 8.24405     | 0             | 1         | 1        |
| Ldb2_j1      | 6.84172  | 4.925       | 0             | 1         | 1        |
| Ldb2         | 17.6134  | 14.6821     | 0             | 1         | 1        |
| Qdpr         | 32.8212  | 34.8944     | 0             | 1         | 1        |
| Qdpr_j1      | 62.8546  | 66.2888     | 0             | 1         | 1        |
| Fam184b      | 0.70642  | 0.898621    | 0.347187      | 0.0450249 | 0.242567 |
| Lcorl_j2     | 0.445199 | 0.370969    | 0             | 1         | 1        |
| Lcorl        | 2.04433  | 1.43788     | 0             | 1         | 1        |
| Kcnip4       | 16.6227  | 14.2859     | 0             | 1         | 1        |
| Kcnip4_j1    | 0.194173 | 0.193046    | -0.0084019    | 0.994329  | 0.998387 |
| Gpr125_j5    | 0.231723 | 0.109383    | 0             | 1         | 1        |
| Gpr125       | 3.44061  | 2.42115     | 0             | 1         | 1        |
| Ppargc1a     | 3.06453  | 2.10384     | 0             | 1         | 1        |

|               |           |                 |            |           |          |
|---------------|-----------|-----------------|------------|-----------|----------|
| Dhx15         | 32.8462   | 31.6728         | -0.0524842 | 0.560698  | 0.821153 |
| Lgi2_j2       | 5.99304   | 4.82388         | 0          | 1         | 1        |
| Lgi2          | 16.2967   | 9.94588         | 0          | 1         | 1        |
| Sepsecs_j4    | 0.311155  | 0.302158        | 0          | 1         | 1        |
| Sepsecs       | 1.59103   | 1.31638         | 0          | 1         | 1        |
| Sel1l3        | 8.51474   | 8.11161         | 0          | 1         | 1        |
| Cckar_j2      | 2.53152   | 4.40573         | 0          | 1         | 1        |
| Cckar         | 7.77938   | 10.5456         | 0          | 1         | 1        |
| Cckar_j5      | 2.19878   | 1.94505         | 0          | 1         | 1        |
| Arap2_j6      | 0.19363   | 0.261216        | 0.43194    | 0.644237  | 0.862839 |
| Arap2_j7      | 0.834612  | 0.556464        | -0.584817  | 0.254434  | 0.602729 |
| XLOC_025855   | 0.499209  | 0.235137        | 0          | 1         | 1        |
| Rell1         | 4.45746   | 4.46852         | 0.00357736 | 0.979352  | 0.993977 |
| Rfc1_j5       | 0.068338  | 0               | 0          | 1         | 1        |
| Rfc1_j6       | 1.66395   | 1.43093         | 0          | 1         | 1        |
| Rfc1          | 2.35547   | 2.19298         | 0          | 1         | 1        |
| Rfc1          | 0.267613  | 0.280006        | 0          | 1         | 1        |
| Ugdh          | 3.7763    | 4.00125         | 0          | 1         | 1        |
| 1110003E01Rik | 12.9116   | 12.0598         | 0          | 1         | 1        |
| Pds5a_j4      | 2.2109    | 2.99518         | 0          | 1         | 1        |
| Pds5a_j5      | 4.84894   | 3.62967         | 0          | 1         | 1        |
| Bend4         | 1.19292   | 0.934808        | 0          | 1         | 1        |
| Bend4_j2      | 0.440196  | 0.266034        | 0          | 1         | 1        |
| Atp8a1_j1     | 1.00004   | 0.701689        | 0          | 1         | 1        |
| Atp8a1_j2     | 5.5362    | 2.16663         | 0          | 1         | 1        |
| Atp8a1        | 11.5402   | 8.90167         | 0          | 1         | 1        |
| Kctd8_j3      | 3.11023   | 0 -1.79769e+308 |            | 2.14E-21  | 6.17E-19 |
| Kctd8         | 10.5474   | 10.3849         | -0.0224012 | 0.831323  | 0.945557 |
| Gnpda2_j4     | 2.5006    | 4.0746          | 0          | 1         | 1        |
| Gnpda2        | 0.446014  | 1.641           | 0          | 1         | 1        |
| Gabrg1        | 0.370418  | 0.248034        | 0          | 1         | 1        |
| Gabra2_j2     | 0.467751  | 0.0424409       | 0          | 1         | 1        |
| Gabra2_j1     | 0.799871  | 0.476198        | 0          | 1         | 1        |
| Gabra2        | 1.50351   | 0.901916        | 0          | 1         | 1        |
| Gabra4        | 0.0868526 | 0.0113103       | -2.94093   | 0.26945   | 1        |
| Gabra4        | 0.141804  | 0.130286        | -0.122214  | 0.87283   | 0.959747 |
| Commd8        | 0.221161  | 0.125531        | -0.817047  | 0.216601  | 0.562734 |
| Corin_j1      | 0.120823  | 0.0686532       | -0.815502  | 0.439366  | 1        |
| Nfxl1         | 1.41596   | 1.36708         | -0.0506806 | 0.801543  | 0.933853 |
| Tec_j4        | 0.872509  | 0.974895        | 0.160077   | 0.709236  | 0.894136 |
| Tec           | 2.21035   | 2.1323          | -0.0518651 | 0.792958  | 0.931024 |
| Tec_j2        | 0.0941447 | 0 -1.79769e+308 |            | 0.0073683 | 1        |
| Fryl_j8       | 6.77778   | 4.59912         | 0          | 1         | 1        |
| Fryl_j9       | 0.554342  | 0.121499        | 0          | 1         | 1        |
| Fryl_j10      | 1.89491   | 1.42953         | 0          | 1         | 1        |
| Ociad2        | 3.34522   | 4.15098         | 0.311354   | 0.0355431 | 0.207747 |
| Sgcb          | 24.4224   | 23.6885         | -0.0440136 | 0.628113  | 0.855168 |

|               |           |                        |            |           |           |
|---------------|-----------|------------------------|------------|-----------|-----------|
| Usp46_j1      | 5.49648   | 5.15163                | -0.0934776 | 0.526244  | 0.800979  |
| Usp46         | 15.3393   | 13.2202                | -0.214487  | 0.028531  | 0.17974   |
| Scfd2         | 3.22331   | 3.41894                | 0.0850086  | 0.551249  | 0.815749  |
| Chic2         | 3.1831    | 3.35813                | 0.0772248  | 0.605869  | 0.844806  |
| Kdr           | 1.25503   | 1.09248                | -0.200111  | 0.26277   | 0.611657  |
| Nmu           | 0.145308  | 0.109702               | -0.405521  | 0.773644  | 0.923158  |
| Nmu_j1        | 0.156721  | 0.0910079              | -0.784137  | 0.332154  | 0.673582  |
| AASDH_j5      | 0.256643  | 0.109191               | 0          | 1         | 1         |
| Ppat          | 2.47891   | 2.10504                | 0          | 1         | 1         |
| Hopx          | 90.4311   | 70.4737                | 0          | 1         | 1         |
| Hopx          | 10.523    | 7.96098                | 0          | 1         | 1         |
| Spink2        | 1.6778    | 1.64101                | -0.0319873 | 0.924575  | 0.97645   |
| Spink2_j1     | 0.810765  | 0.22222                | -1.8673    | 0.120175  | 0.431667  |
| 2610024G14Rik | 7.92647   | 7.6802                 | -0.0455353 | 0.702779  | 0.891161  |
| Gm2199        | 34.0157   | 32.2258                | -0.0779869 | 0.482191  | 0.775494  |
| Epha5_j5      | 0.363169  | 0 -1.79769e+308        |            | 1.41E-16  | 3.55E-14  |
| Epha5_j7      | 0.613838  | 0.438273               | -0.486028  | 0.1503    | 0.480451  |
| Cenpc1        | 2.16377   | 2.43078                | 0          | 1         | 1         |
| Cenpc1_j7     | 1.0371    | 0.704899               | 0          | 1         | 1         |
| Uba6          | 5.4433    | 5.072                  | 0          | 1         | 1         |
| Tmprss11c     | 0.246719  | 0.19247                | -0.358236  | 0.396598  | 0.721302  |
| Igj_j1        | 0.11082   | 0.15814                | 0.512982   | 0.490593  | 0.780069  |
| Igj           | 0.27986   | 0.186989               | -0.581748  | 0.437735  | 0.747827  |
| Grsf1         | 29.2637   | 25.0987                | 0          | 1         | 1         |
| Grsf1_j1      | 7.14664   | 4.65033                | 0          | 1         | 1         |
| Gc            | 0.207444  | 0.314857               | 0.601978   | 0.231864  | 0.578875  |
| Adamts3_j2    | 1.39766   | 1.10274                | -0.341921  | 0.137831  | 0.461663  |
| Adamts3       | 0.692558  | 0.384697               | -0.848212  | 0.0017096 | 0.0220499 |
| Cox18_j1      | 0.0551902 | 0.0447998              | -0.300919  | 0.861013  | 1         |
| Cox18         | 0         | 0.0525058 1.79769e+308 |            | 0.126725  | 1         |
| Ankrd17_j1    | 6.6403    | 5.98213                | 0          | 1         | 1         |
| XLOC_025917   | 0.155207  | 0.104058               | -0.576797  | 0.349884  | 0.687507  |
| Rassf6_j2     | 0.498165  | 0.26765                | -0.896274  | 0.0787902 | 0.340448  |
| Rchy1         | 4.41304   | 4.86382                | 0.140319   | 0.360209  | 0.695216  |
| Cdkl2         | 3.09661   | 1.88164                | 0          | 1         | 1         |
| Cdkl2         | 8.2755    | 7.23893                | 0          | 1         | 1         |
| Cdkl2         | 0.0251213 | 0.272503               | 0          | 1         | 1         |
| G3bp2         | 7.7465    | 5.90454                | 0          | 1         | 1         |
| Naaa          | 17.5674   | 16.0625                | -0.129204  | 0.207566  | 0.55198   |
| Sdad1         | 3.14319   | 3.10875                | -0.0158964 | 0.908761  | 0.971246  |
| Cxcl9         | 0.743432  | 0.654638               | -0.183504  | 0.562884  | 0.822297  |
| Cxcl10        | 1.55809   | 1.28104                | 0          | 1         | 1         |
| Nup54_j5      | 0.196012  | 0                      | 0          | 1         | 1         |
| Scarb2_j2     | 26.821    | 27.8129                | 0          | 1         | 1         |
| Scarb2        | 9.31853   | 8.67969                | 0          | 1         | 1         |
| Ankrd56       | 0.42484   | 0.183632               | 0          | 1         | 1         |
| Cnot6l_j2     | 0.157117  | 0.0870742              | -0.851526  | 0.114947  | 0.421857  |

|               |           |                 |            |           |           |
|---------------|-----------|-----------------|------------|-----------|-----------|
| Cnot6l        | 2.17076   | 1.94274         | -0.160112  | 0.239723  | 0.587096  |
| Paqr3         | 1.75811   | 1.57671         | -0.157109  | 0.502507  | 0.786492  |
| Antxr2_j8     | 0.590962  | 0               | 0          | 1         | 1         |
| Antxr2        | 2.27939   | 1.38946         | 0          | 1         | 1         |
| Prkg2         | 1.81619   | 1.26865         | -0.517617  | 0.0060603 | 0.0590265 |
| Rasgef1b_j5   | 0.163091  | 0 -1.79769e+308 |            | 0.0008513 | 0.0125668 |
| Rasgef1b_j4   | 0.79579   | 0.739225        | -0.106374  | 0.755338  | 0.915526  |
| Rasgef1b_j2   | 1.22048   | 1.17775         | -0.0514185 | 0.828545  | 0.944579  |
| Tmem150c_j1   | 5.33627   | 5.04596         | 0          | 1         | 1         |
| Tmem150c_j2   | 4.63341   | 5.1903          | 0          | 1         | 1         |
| Tmem150c      | 6.71264   | 4.06268         | 0          | 1         | 1         |
| Sec31a_j4     | 11.1681   | 8.87053         | 0          | 1         | 1         |
| Sec31a_j5     | 1.23336   | 0.793777        | 0          | 1         | 1         |
| Sec31a_j6     | 12.9361   | 9.66414         | 0          | 1         | 1         |
| 5430416N02Rik | 0.16742   | 0.249839        | 0.577526   | 0.296827  | 0.643452  |
| Lin54         | 1.46619   | 0.91635         | 0          | 1         | 1         |
| Lin54_j6      | 1.95781   | 1.95159         | 0          | 1         | 1         |
| Plac8         | 0.611909  | 1.10151         | 0.848091   | 0.0307822 | 0.188962  |
| Coq2_j3       | 3.29838   | 2.11164         | 0          | 1         | 1         |
| Coq2_j2       | 7.7107    | 7.60738         | 0          | 1         | 1         |
| Coq2          | 2.39462   | 1.34598         | 0          | 1         | 1         |
| Hpse          | 1.03008   | 0.276055        | -1.89972   | 4.98E-07  | 2.24E-05  |
| Fam175a_j1    | 0.795153  | 0.767973        | -0.0501772 | 0.786766  | 0.928716  |
| Nkx6-1_j1     | 0.074016  | 0.0556245       | -0.412116  | 0.834613  | 1         |
| Wdfy3_j1      | 0.785767  | 0 -1.79769e+308 |            | 1.67E-16  | 4.17E-14  |
| Wdfy3_j5      | 2.18543   | 1.51414         | -0.529417  | 5.78E-05  | 0.0013489 |
| Mapk10        | 4.13089   | 2.28809         | 0          | 1         | 1         |
| Slc10a6       | 3.78076   | 5.27775         | 0.481246   | 0.0010543 | 0.0148914 |
| Klhl8_j4      | 0.584836  | 6.16E-05        | 0          | 1         | 1         |
| Klhl8         | 1.91888   | 1.8731          | 0          | 1         | 1         |
| Hsd17b11_j1   | 0.0746303 | 0.0153047       | -2.28579   | 0.396728  | 1         |
| Hsd17b11      | 2.08986   | 1.90775         | -0.131537  | 0.605339  | 0.844416  |
| Sparcl1_j1    | 74.9948   | 31.0266         | 0          | 1         | 1         |
| Sparcl1       | 54.7697   | 47.501          | 0          | 1         | 1         |
| Zfp951_j7     | 0.233682  | 0.0391797       | -2.57637   | 0.243725  | 0.591047  |
| Zfp951        | 0.222116  | 0.16835         | -0.399847  | 0.575028  | 0.828142  |
| Gbp9_j1       | 0.342035  | 0.289963        | -0.238277  | 0.538404  | 0.807898  |
| Gbp4_j1       | 0.193679  | 0.119735        | -0.693828  | 0.189433  | 0.531183  |
| Gbp4_j6       | 0.0758237 | 0 -1.79769e+308 |            | 0.0046835 | 1         |
| AK138287      | 0.339378  | 0.352754        | 0.0557692  | 0.930139  | 0.978611  |
| AK138287_j2   | 0.546037  | 0.575508        | 0.0758372  | 0.899354  | 0.967837  |
| AK087483      | 1.99854   | 2.66924         | 0.417487   | 0.18403   | 0.524679  |
| Zfp644_j7     | 0.557246  | 0.468536        | 0          | 1         | 1         |
| Hfm1_j5       | 0.280769  | 0.20617         | -0.44555   | 0.439848  | 0.749306  |
| Hfm1_j6       | 0.148214  | 0.0501904       | -1.56219   | 0.0469646 | 0.24858   |
| Hfm1_j7       | 0.163598  | 0.0291389       | -2.48914   | 0.0216582 | 0.148897  |
| Tgfbr3        | 3.50614   | 3.01492         | 0          | 1         | 1         |

|                  |           |                 |            |           |           |
|------------------|-----------|-----------------|------------|-----------|-----------|
| Gm9727           | 16.6443   | 16.1142         | -0.0466908 | 0.757013  | 0.916197  |
| Glmn             | 6.03277   | 5.40221         | -0.159269  | 0.267886  | 0.616532  |
| Evi5_j8          | 0.539073  | 0.315929        | 0          | 1         | 1         |
| Evi5_j4          | 4.94123   | 4.80664         | 0          | 1         | 1         |
| Evi5_j10         | 1.82159   | 1.81324         | 0          | 1         | 1         |
| Evi5_j11         | 1.77771   | 1.62937         | 0          | 1         | 1         |
| Fam69a           | 0.148467  | 0.0893528       | 0          | 1         | 1         |
| Tmed5            | 7.31933   | 7.42339         | 0.0203678  | 0.855355  | 0.954239  |
| Atp5k_j1         | 8.72117   | 7.03936         | -0.309078  | 0.186254  | 0.526784  |
| Atp5k            | 4.55586   | 4.48976         | -0.0210826 | 0.895173  | 0.966918  |
| Mfsd7a_j7        | 0.134205  | 0 -1.79769e+308 |            | 0.0024475 | 1         |
| Mfsd7a_j8        | 0.0976662 | 0.0494308       | -0.982447  | 0.343889  | 1         |
| Mfsd7a_j9        | 0.172023  | 0.282021        | 0.713204   | 0.303673  | 0.649277  |
| Cplx1_j3         | 398.954   | 318.095         | -0.326763  | 0.0002601 | 0.004766  |
| Cplx1            | 33.9456   | 24.7476         | -0.455937  | 7.86E-07  | 3.38E-05  |
| Gak_j5           | 0.109287  | 0.0165668       | 0          | 1         | 1         |
| Gak              | 0.534602  | 0.571789        | 0          | 1         | 1         |
| Dgkq_j1          | 0.353658  | 0.260505        | 0          | 1         | 1         |
| Crlf2_j2         | 0.398674  | 0.524807        | 0.396578   | 0.212188  | 0.557126  |
| XLOC_025991      | 0.276962  | 0.360434        | 0.380048   | 0.575037  | 0.828142  |
| Crlf2_j9         | 0.819618  | 0.986826        | 0.267846   | 0.669222  | 0.874811  |
| 5430403G16Rik_j1 | 0.0913316 | 0.0136617       | -2.74098   | 0.432456  | 1         |
| Gtpbp6_j3        | 0         | 0.0489302       | 0          | 1         | 1         |
| Pgam5_j2         | 0.708992  | 0.520664        | 0          | 1         | 1         |
| P2rx2            | 1.49848   | 1.43008         | -0.0673979 | 0.792662  | 0.931005  |
| Fbrsl1           | 0.557002  | 0.217564        | -1.35624   | 0.0025384 | 0.0301991 |
| Fbrsl1_j5        | 0.85539   | 1.33906         | 0.646565   | 0.0072537 | 0.0676874 |
| Fbrsl1_j10       | 0.875408  | 0.94337         | 0.107868   | 0.716968  | 0.897819  |
| Noc4l            | 3.56558   | 3.84445         | 0.108643   | 0.34039   | 0.680503  |
| Ep400_j1         | 4.84865   | 4.51693         | -0.10224   | 0.443971  | 0.751894  |
| Ep400_j7         | 0.0354455 | 0.0700397       | 0.982569   | 0.280634  | 1         |
| Ep400_j8         | 0.0808741 | 0 -1.79769e+308 |            | 6.42E-05  | 1         |
| Ep400_j9         | 0.150602  | 0 -1.79769e+308 |            | 1.56E-08  | 1.05E-06  |
| Pus1             | 3.6318    | 3.82096         | 0.0732504  | 0.619561  | 0.850756  |
| Pus1             | 0.108773  | 0.153209        | 0.494188   | 0.501566  | 1         |
| Ulk1_j3          | 7.41341   | 8.74365         | 0          | 1         | 1         |
| Ulk1_j4          | 3.41342   | 1.69787         | 0          | 1         | 1         |
| Ulk1             | 5.85298   | 4.82818         | 0          | 1         | 1         |
| Hscb_j1          | 1.3745    | 0.667176        | -1.04277   | 0.0726981 | 0.324435  |
| Hscb             | 6.38873   | 6.71094         | 0.070986   | 0.713482  | 0.896209  |
| Miat_j13         | 35.9618   | 41.6063         | 0          | 1         | 1         |
| Miat_j14         | 0.187317  | 0.13425         | 0          | 1         | 1         |
| Miat_j15         | 0.13812   | 0.571136        | 0          | 1         | 1         |
| Miat_j12         | 1.89319   | 1.67278         | 0          | 1         | 1         |
| Cryba4_j2        | 0.245935  | 0 -1.79769e+308 |            | 0.0014078 | 0.0187798 |
| Asphd2_j3        | 3.10184   | 2.63962         | 0          | 1         | 1         |
| Sez6l_j3         | 1.84399   | 5.25122         | 0          | 1         | 1         |

|                  |           |                 |           |           |          |
|------------------|-----------|-----------------|-----------|-----------|----------|
| Sez6l_j4         | 2.28529   | 5.06935         | 0         | 1         | 1        |
| Adrbk2_j3        | 0.093268  | 0               | 0         | 1         | 1        |
| Adrbk2           | 1.15248   | 0.676371        | 0         | 1         | 1        |
| Crybb3           | 0.0805985 | 0.100668        | 0.320782  | 0.706574  | 1        |
| Crybb3           | 0.526768  | 0.481491        | -0.129657 | 0.699952  | 0.889482 |
| 2900026A02Rik    | 5.56034   | 7.05853         | 0.344195  | 0.0021998 | 0.026906 |
| 2900026A02Rik_j5 | 0.686113  | 0.48624         | -0.496779 | 0.0267032 | 0.171982 |
| 2900026A02Rik_j6 | 0.0950296 | 0 -1.79769e+308 |           | 1.84E-07  | 1        |
| Sgsm1            | 9.62336   | 7.76917         | 0         | 1         | 1        |
| Sart3_j3         | 0.952703  | 0.965973        | 0         | 1         | 1        |
| Sart3_j4         | 2.34124   | 2.63253         | 0         | 1         | 1        |
| Sart3_j5         | 2.03878   | 1.88516         | 0         | 1         | 1        |
| Sart3            | 2.33986   | 2.10302         | 0         | 1         | 1        |
| Selplg           | 0.653316  | 1.57414         | 1.26871   | 1.06E-07  | 5.69E-06 |
| Coro1c_j2        | 13.0835   | 16.8051         | 0         | 1         | 1        |
| Coro1c           | 19.0543   | 20.1316         | 0         | 1         | 1        |
| Ssh1_j3          | 3.60536   | 3.04444         | 0         | 1         | 1        |
| Ssh1_j1          | 0.904386  | 0.45696         | 0         | 1         | 1        |
| Ssh1             | 1.63877   | 1.90785         | 0         | 1         | 1        |
| Svop             | 12.7268   | 9.48888         | 0         | 1         | 1        |
| Alkbh2           | 1.26493   | 1.17378         | -0.107903 | 0.662831  | 0.872283 |
| Kctd10           | 38.4352   | 41.002          | 0         | 1         | 1        |
| Kctd10           | 6.63845   | 6.1741          | 0         | 1         | 1        |
| Mmab_j2          | 6.55702   | 6.93554         | 0         | 1         | 1        |
| Mmab             | 0.74821   | 0.831401        | 0         | 1         | 1        |
| Trpv4            | 0.158739  | 0.22772         | 0.520606  | 0.399407  | 0.723009 |
| Trpv4_j3         | 0.133659  | 0.0501862       | -1.41319  | 0.157358  | 1        |
| Gltp             | 13.6245   | 15.8374         | 0.217128  | 0.0580571 | 0.282793 |
| Git2_j4          | 0.0750726 | 0               | 0         | 1         | 1        |
| Git2_j5          | 0.393086  | 0.356835        | 0         | 1         | 1        |
| 2610524H06Rik    | 27.5918   | 25.1515         | 0         | 1         | 1        |
| 2610524H06Rik    | 7.18918   | 7.68831         | 0         | 1         | 1        |
| Acads            | 10.043    | 12.0824         | 0.266719  | 0.0320344 | 0.194047 |
| Unc119b          | 7.99272   | 9.55364         | 0.257363  | 0.018944  | 0.135853 |
| Mlec_j3          | 0.134713  | 0               | 0         | 1         | 1        |
| Mlec             | 11.3887   | 10.7347         | 0         | 1         | 1        |
| Cabp1_j6         | 1.40659   | 0               | 0         | 1         | 1        |
| Rnf10_j1         | 3.97394   | 5.04445         | 0         | 1         | 1        |
| Rnf10_j4         | 0.0755304 | 0.147563        | 0         | 1         | 1        |
| Dynll1           | 6.6706    | 8.4783          | 0.345958  | 0.0204065 | 0.142913 |
| Gatc             | 1.11414   | 1.18895         | 0.093756  | 0.582683  | 0.832835 |
| Cox6a1           | 185.528   | 192.199         | 0.0509631 | 0.553065  | 0.816949 |
| Sirt4_j2         | 0.886959  | 0.624405        | -0.506386 | 0.300913  | 0.647316 |
| Sirt4            | 0.145999  | 0.104641        | -0.4805   | 0.616094  | 0.848645 |
| Ccdc64_j2        | 8.17951   | 7.58768         | 0         | 1         | 1        |
| Ccdc64           | 3.16501   | 3.4826          | 0         | 1         | 1        |
| Prkab1_j2        | 0.632522  | 0.711324        | 0         | 1         | 1        |



|               |           |                 |            |           |           |
|---------------|-----------|-----------------|------------|-----------|-----------|
| Prkab1_j5     | 0.210402  | 0.292487        | 0          | 1         | 1         |
| Prkab1_j4     | 1.60656   | 2.14959         | 0          | 1         | 1         |
| Tmem233_j3    | 0.118466  | 0.135747        | 0          | 1         | 1         |
| Hspb8_j3      | 93.6181   | 90.8418         | 0          | 1         | 1         |
| Hspb8         | 0.404369  | 0.266064        | 0          | 1         | 1         |
| Srrm4         | 1.1217    | 1.32348         | 0          | 1         | 1         |
| Suds3         | 16.4734   | 17.0261         | 0          | 1         | 1         |
| Suds3         | 12.1184   | 10.6718         | 0          | 1         | 1         |
| Pebp1_j4      | 217.92    | 233.225         | 0.0979244  | 0.262796  | 0.611657  |
| Fbxw8         | 6.43406   | 6.85921         | 0          | 1         | 1         |
| Rnft2_j6      | 0.182565  | 0.256021        | 0          | 1         | 1         |
| Gm16065       | 0.694056  | 0.58551         | 0          | 1         | 1         |
| Sdsl_j3       | 0.702889  | 0.689481        | -0.0277868 | 0.949779  | 0.985431  |
| Sdsl_j4       | 0.388985  | 0.473327        | 0.283124   | 0.693015  | 0.886263  |
| Plbd2         | 74.4662   | 76.4407         | 0.0377547  | 0.659912  | 0.870917  |
| Tpcn1         | 8.62034   | 5.11097         | 0          | 1         | 1         |
| Oas2_j2       | 0.0143027 | 0.110219        | 2.94601    | 0.0374504 | 1         |
| Oas2_j7       | 0.0623401 | 0 -1.79769e+308 |            | 0.0625469 | 1         |
| Oas1c_j1      | 1.77326   | 2.4544          | 0          | 1         | 1         |
| Oas1c_j6      | 1.1811    | 0.561362        | 0          | 1         | 1         |
| Oas1c         | 1.11954   | 0.410243        | 0          | 1         | 1         |
| Oas1c_j7      | 0.282159  | 0.425495        | 0          | 1         | 1         |
| Oas1a         | 1.50618   | 2.06536         | 0          | 1         | 1         |
| Rph3a_j3      | 48.1516   | 32.6634         | 0          | 1         | 1         |
| Rph3a_j4      | 1.85302   | 0               | 0          | 1         | 1         |
| Rph3a         | 47.9221   | 27.887          | 0          | 1         | 1         |
| Rph3a_j5      | 12.7849   | 7.81074         | 0          | 1         | 1         |
| Ptpn11_j2     | 1.7018    | 1.94549         | 0          | 1         | 1         |
| Ptpn11        | 10.0902   | 9.01969         | 0          | 1         | 1         |
| Trafd1_j7     | 4.37723   | 5.04022         | 0.203469   | 0.217472  | 0.563556  |
| Erp29_j1      | 35.2745   | 41.8601         | 0.246952   | 0.022921  | 0.154783  |
| Erp29         | 8.55922   | 8.61146         | 0.0087791  | 0.948441  | 0.985052  |
| Mapkapk5_j4   | 0.713724  | 0.458756        | 0          | 1         | 1         |
| Mapkapk5_j3   | 0.163848  | 0.0604942       | 0          | 1         | 1         |
| Aldh2_j1      | 3.54268   | 3.12026         | 0          | 1         | 1         |
| Aldh2         | 17.206    | 13.55           | 0          | 1         | 1         |
| Cux2_j5       | 0.423066  | 0.0329559       | -3.68227   | 9.89E-06  | 0.0003071 |
| Tctn1_j1      | 0.981427  | 0.847805        | 0          | 1         | 1         |
| Tctn1_j2      | 0.504084  | 0.474985        | 0          | 1         | 1         |
| 1500011H22Rik | 5.56421   | 5.38183         | -0.0480788 | 0.619704  | 0.85078   |
| Atp2a2_j2     | 7.47073   | 7.86308         | 0          | 1         | 1         |
| Atp2a2_j3     | 0.373291  | 0.378623        | 0          | 1         | 1         |
| Ift81_j2      | 0.167087  | 0.26182         | 0.647974   | 0.27416   | 0.623288  |
| Ift81         | 3.12593   | 2.64983         | -0.238387  | 0.16778   | 0.504318  |
| Camkk2        | 4.27715   | 3.39126         | 0          | 1         | 1         |
| Anapc5_j6     | 1.66404   | 1.12353         | 0          | 1         | 1         |
| Kdm2b_j3      | 0.165851  | 0.126435        | -0.391498  | 0.518434  | 0.796491  |

|                  |           |                 |           |           |          |
|------------------|-----------|-----------------|-----------|-----------|----------|
| Kdm2b_j4         | 0.228069  | 0.258637        | 0.181464  | 0.659863  | 0.870883 |
| Morn3_j2         | 0.110613  | 0.0420865       | -1.39409  | 0.310446  | 1        |
| Rhof             | 6.12387   | 6.64708         | 0.118278  | 0.33989   | 0.68005  |
| Diablo_j2        | 15.7322   | 21.1089         | 0         | 1         | 1        |
| Vps33a_j8        | 5.75631   | 5.12894         | 0         | 1         | 1        |
| Vps33a_j7        | 0.212067  | 0.062498        | 0         | 1         | 1        |
| Vps33a_j11       | 0.238633  | 0.1707          | 0         | 1         | 1        |
| Clip1_j4         | 3.81782   | 4.03241         | 0         | 1         | 1        |
| Clip1_j3         | 4.34496   | 3.82617         | 0         | 1         | 1        |
| Zcchc8           | 2.21663   | 2.13233         | 0         | 1         | 1        |
| Zcchc8           | 1.541     | 1.43888         | 0         | 1         | 1        |
| Zcchc8_j1        | 0.708979  | 0.859342        | 0         | 1         | 1        |
| Rsrc2            | 9.73531   | 9.91958         | 0         | 1         | 1        |
| Vps37b           | 1.9018    | 2.14439         | 0.173204  | 0.235035  | 0.582228 |
| Abcb9            | 12.7774   | 11.0319         | 0         | 1         | 1        |
| Pitpnm2_j11      | 0.0474954 | 0.0139796       | 0         | 1         | 1        |
| Mphosph9_j1      | 0.238813  | 0.0663969       | 0         | 1         | 1        |
| Mphosph9_j2      | 0.30088   | 0.0435911       | 0         | 1         | 1        |
| Cdk2ap1_j3       | 5.83845   | 6.55106         | 0.166143  | 0.167877  | 0.50444  |
| Sbno1            | 4.70344   | 4.26829         | 0         | 1         | 1        |
| Sbno1_j3         | 1.50073   | 1.75082         | 0         | 1         | 1        |
| Sbno1_j2         | 2.92506   | 2.28094         | 0         | 1         | 1        |
| Rilpl2           | 4.40809   | 5.1758          | 0         | 1         | 1        |
| Rilpl1_j1        | 0.717166  | 0.786391        | 0         | 1         | 1        |
| Rilpl1           | 2.04358   | 2.11634         | 0         | 1         | 1        |
| Eif2b1           | 14.5789   | 14.6717         | 0.009152  | 0.940223  | 0.981805 |
| Ccdc92_j7        | 46.6114   | 57.0079         | 0         | 1         | 1        |
| Ncor2_j19        | 2.00868   | 2.16208         | 0.106173  | 0.558752  | 0.82019  |
| Ncor2_j21        | 0.129928  | 0 -1.79769e+308 |           | 5.07E-06  | 1        |
| Ncor2_j22        | 0.0744539 | 0.0207156       | -1.84563  | 0.0754109 | 1        |
| Scarb1           | 0.0275854 | 0.807946        | 0         | 1         | 1        |
| Scarb1           | 4.79636   | 4.62954         | 0         | 1         | 1        |
| Ubc              | 0.681347  | 0               | 0         | 1         | 1        |
| Dhx37            | 2.49993   | 2.65128         | 0.0848021 | 0.526936  | 0.801327 |
| Slc15a4          | 4.17684   | 3.66689         | 0         | 1         | 1        |
| Slc15a4_j2       | 3.29679   | 4.3575          | 0         | 1         | 1        |
| Tmem132d         | 0.359475  | 0.464034        | 0.368338  | 0.183007  | 0.523488 |
| 5930412G12Rik_j3 | 0.140723  | 0.230417        | 0.71139   | 0.219065  | 0.565463 |
| 5930412G12Rik    | 0.059726  | 0.080836        | 0.43664   | 0.694452  | 1        |
| Rimbp2_j4        | 0.811605  | 0.509682        | 0         | 1         | 1        |
| Rimbp2_j5        | 0.175909  | 0.0616471       | 0         | 1         | 1        |
| Stx2             | 29.8232   | 30.1174         | 0         | 1         | 1        |
| Zfp11            | 1.05671   | 1.12813         | 0.0943614 | 0.629028  | 0.85574  |
| Chchd2_j5        | 2.29616   | 2.40851         | 0.0689198 | 0.882495  | 0.962629 |
| Gusb             | 3.79188   | 4.83886         | 0         | 1         | 1        |
| Asl              | 2.46924   | 2.71655         | 0         | 1         | 1        |
| Sbds_j1          | 1.37818   | 1.00552         | -0.454821 | 0.0278039 | 0.176748 |

|             |            |                 |            |           |           |
|-------------|------------|-----------------|------------|-----------|-----------|
| Sbds        | 3.69653    | 4.71311         | 0.35051    | 0.0039608 | 0.0425871 |
| Wbscr17_j6  | 28.261     | 26.9995         | 0          | 1         | 1         |
| Wbscr17_j7  | 6.02935    | 6.66885         | 0          | 1         | 1         |
| XLOC_026147 | 0.106376   | 0.0807659       | -0.397357  | 0.739525  | 1         |
| Auts2_j2    | 0.00115263 | 0.0601324       | 0          | 1         | 1         |
| Auts2_j4    | 0.198928   | 0.12979         | 0          | 1         | 1         |
| Auts2_j3    | 0.19913    | 0               | 0          | 1         | 1         |
| Wbscr16     | 1.97472    | 1.95122         | -0.0172697 | 0.93008   | 0.97861   |
| Ncf1_j1     | 0.131432   | 0 -1.79769e+308 |            | 0.000513  | 1         |
| Ncf1        | 0.421325   | 0.469483        | 0.156137   | 0.677909  | 0.878919  |
| Gtf2i_j1    | 11.5739    | 13.893          | 0          | 1         | 1         |
| Gtf2i_j4    | 0.892367   | 0.601828        | 0          | 1         | 1         |
| Gtf2i       | 13.2732    | 11.6152         | 0          | 1         | 1         |
| Gtf2ird1    | 1.46385    | 1.77652         | 0          | 1         | 1         |
| Clip2_j1    | 13.3468    | 10.271          | 0          | 1         | 1         |
| Lat2_j4     | 0.176823   | 0 -1.79769e+308 |            | 0.0009963 | 0.0142755 |
| Eif4h_j2    | 31.3839    | 33.683          | 0          | 1         | 1         |
| Eif4h       | 75.13      | 70.2956         | 0          | 1         | 1         |
| Limk1_j1    | 0.31325    | 0 -1.79769e+308 |            | 0.000123  | 0.0025532 |
| Limk1       | 63.427     | 51.1279         | -0.310986  | 0.0003537 | 0.0061077 |
| Vps37d      | 4.28414    | 3.11838         | -0.458211  | 0.0211976 | 0.146549  |
| Fzd9        | 0.27134    | 0.382346        | 0.494776   | 0.171699  | 0.508832  |
| Pom121      | 3.69392    | 3.07718         | 0          | 1         | 1         |
| Hip1_j6     | 0.0650463  | 0               | 0          | 1         | 1         |
| Hip1_j2     | 2.33374    | 1.22833         | 0          | 1         | 1         |
| Tmem120a    | 1.14646    | 1.26771         | 0.145035   | 0.427179  | 0.741603  |
| Stylx1_j1   | 0.448734   | 0.3514          | -0.352746  | 0.510128  | 0.79097   |
| Ywhag       | 248.247    | 225.156         | 0          | 1         | 1         |
| Lrwd1_j1    | 0.0849798  | 0.0836448       | -0.0228439 | 0.969867  | 1         |
| Orai2_j1    | 1.91162    | 1.14772         | -0.736023  | 0.0016312 | 0.0211735 |
| Prkrip1     | 10.6996    | 13.222          | 0.305383   | 0.0444227 | 0.240435  |
| Cux1        | 0.987329   | 0.482091        | 0          | 1         | 1         |
| Cux1        | 6.83444    | 6.65452         | 0          | 1         | 1         |
| Emid2       | 0.62651    | 0.703993        | 0.168224   | 0.582059  | 0.832667  |
| Znhit1      | 3.52137    | 4.30314         | 0          | 1         | 1         |
| Ap1s1_j2    | 6.96067    | 10.5918         | 0          | 1         | 1         |
| Ap1s1       | 65.246     | 101.075         | 0          | 1         | 1         |
| Serpine1_j1 | 0.0729068  | 0 -1.79769e+308 |            | 0.0083431 | 1         |
| Serpine1    | 0.448898   | 1.16484         | 1.37568    | 5.15E-08  | 3.02E-06  |
| Trim56_j2   | 0.0691052  | 0.0916675       | 0.407615   | 0.684619  | 1         |
| Trim56_j1   | 0.666877   | 0.572396        | -0.220408  | 0.469109  | 0.767371  |
| Srrt        | 0.774921   | 0.511786        | 0          | 1         | 1         |
| Slc12a9_j1  | 3.69685    | 3.72709         | 0          | 1         | 1         |
| Slc12a9_j4  | 0.644165   | 0.631427        | 0          | 1         | 1         |
| Slc12a9_j2  | 0.889367   | 0.947407        | 0          | 1         | 1         |
| Pop7        | 4.41857    | 4.35235         | -0.0217874 | 0.889799  | 0.964993  |
| Gnb2_j1     | 0.209913   | 0.344208        | 0.713489   | 0.0640527 | 0.300291  |

|               |           |                 |            |           |           |
|---------------|-----------|-----------------|------------|-----------|-----------|
| Gnb2_j3       | 1.53718   | 1.33273         | -0.205908  | 0.29325   | 0.64028   |
| Mospd3        | 9.57508   | 9.37803         | -0.0299991 | 0.836901  | 0.947822  |
| Pcolce_j1     | 5.96432   | 9.51761         | 0.674242   | 8.69E-05  | 0.0019016 |
| Pcolce        | 1.93719   | 2.84769         | 0.555829   | 0.0020698 | 0.0256568 |
| Irs3          | 0.589587  | 0.479689        | 0          | 1         | 1         |
| Agfg2_j3      | 5.83401   | 5.89195         | 0          | 1         | 1         |
| Agfg2         | 9.36888   | 6.60383         | 0          | 1         | 1         |
| 6430598A04Rik | 8.03676   | 6.3868          | 0          | 1         | 1         |
| Mepce         | 3.90818   | 3.99385         | 0          | 1         | 1         |
| Mepce_j2      | 6.34738   | 6.89704         | 0          | 1         | 1         |
| Mepce_j3      | 7.59935   | 7.59323         | 0          | 1         | 1         |
| Pilra         | 0.0244645 | 0.19224         | 2.97414    | 0.151769  | 0.483048  |
| Pilrb2_j3     | 0.0783456 | 0.0611315       | -0.357936  | 0.844415  | 1         |
| Cyp3a13_j1    | 0.0933486 | 0.0721041       | -0.372546  | 0.749607  | 1         |
| Cyp3a13_j2    | 0.0522911 | 0.0648946       | 0.311534   | 0.788735  | 1         |
| Gjc3          | 1.83636   | 1.83926         | 0          | 1         | 1         |
| Taf6_j2       | 1.2826    | 1.47141         | 0          | 1         | 1         |
| Taf6_j3       | 0.34264   | 0.378957        | 0          | 1         | 1         |
| Taf6          | 5.75832   | 6.40838         | 0          | 1         | 1         |
| BC037034_j1   | 0.120559  | 0.164929        | 0.452104   | 0.404627  | 0.726779  |
| BC037034_j8   | 9.34975   | 9.08888         | -0.0408247 | 0.845167  | 0.951025  |
| Gpc2_j3       | 0.227809  | 0.328435        | 0.527786   | 0.323113  | 0.666115  |
| Gpc2_j4       | 0.0777341 | 0 -1.79769e+308 | 0.0110349  | 0.0110349 | 1         |
| Gpc2_j5       | 0.132132  | 0.218882        | 0.728173   | 0.271008  | 0.620042  |
| Zfp68         | 3.46117   | 3.84117         | 0          | 1         | 1         |
| Zfp68         | 2.51932   | 2.77976         | 0          | 1         | 1         |
| Pdgfa_j1      | 1.74226   | 2.73078         | 0          | 1         | 1         |
| Pdgfa         | 11.7479   | 10.6146         | 0          | 1         | 1         |
| Prkar1b_j6    | 0.237136  | 0               | 0          | 1         | 1         |
| Prkar1b       | 73.9351   | 69.1916         | 0          | 1         | 1         |
| Adap1         | 13.3233   | 12.3057         | 0          | 1         | 1         |
| Cox19         | 5.82183   | 6.75805         | 0.215134   | 0.0737953 | 0.327402  |
| 3110082117Rik | 2.64019   | 2.59344         | 0          | 1         | 1         |
| Zfand2a_j2    | 0.71187   | 0.980004        | 0          | 1         | 1         |
| Zfand2a       | 8.95174   | 8.94363         | 0          | 1         | 1         |
| Zfand2a       | 6.74782   | 7.00269         | 0          | 1         | 1         |
| Micall2_j3    | 0.143104  | 0.0901526       | -0.666625  | 0.412832  | 0.731839  |
| Ints1         | 8.46342   | 7.87737         | 0          | 1         | 1         |
| Psmg3         | 16.8883   | 18.4689         | 0.129077   | 0.316503  | 0.660085  |
| Ftsj2         | 0.264742  | 0.56262         | 1.08757    | 0.0323445 | 0.195244  |
| Snx8          | 4.50922   | 5.98187         | 0          | 1         | 1         |
| Ttyh3_j2      | 9.09975   | 8.17337         | 0          | 1         | 1         |
| Ttyh3         | 2.5349    | 3.14069         | 0          | 1         | 1         |
| Ttyh3_j1      | 3.24972   | 3.49825         | 0          | 1         | 1         |
| lqce          | 1.70168   | 1.68513         | -0.0140997 | 0.931738  | 0.979283  |
| Gna12         | 29.152    | 30.4564         | 0          | 1         | 1         |
| Card11_j1     | 0.0854152 | 0 -1.79769e+308 | 0.0041179  | 0.0041179 | 1         |

|               |             |             |              |           |           |
|---------------|-------------|-------------|--------------|-----------|-----------|
| Card11_j3     | 0.154137    | 0.0796487   | -0.952495    | 0.114309  | 0.420804  |
| Radil         | 3.15682     | 3.45771     | 0.131342     | 0.354751  | 0.690885  |
| Mmd2_j5       | 2.72309     | 1.89973     | -0.51945     | 0.0427239 | 0.233921  |
| Mmd2_j4       | 1.67701     | 2.70305     | 0.688699     | 0.0079531 | 0.0722495 |
| Tnrc18_j1     | 5.70688     | 5.70582     | -0.000266996 | 0.998145  | 0.999228  |
| Tnrc18_j7     | 0.841276    | 1.31184     | 0            | 1         | 1         |
| Tnrc18_j8     | 0.0683768   | 0.000195236 | 0            | 1         | 1         |
| Fbxl18        | 0.29117     | 0.237009    | 0            | 1         | 1         |
| Actb          | 561.389     | 678.296     | 0.272914     | 0.0041391 | 0.044019  |
| Rnf216        | 3.16661     | 2.64864     | 0            | 1         | 1         |
| Rnf216        | 1.43402     | 1.67319     | 0            | 1         | 1         |
| Rbak_j2       | 0.145826    | 0.050017    | -1.54376     | 0.0723742 | 0.32376   |
| Rbak_j1       | 0.21199     | 9.90E-05    | -11.0648     | 0.869178  | 0.958391  |
| Rbak          | 0.359488    | 0.600226    | 0.739561     | 0.0360878 | 0.209722  |
| Zfp316        | 1.10134     | 1.1184      | 0.0221831    | 0.904771  | 0.969711  |
| E130309D02Rik | 7.05906     | 7.2439      | 0.0372902    | 0.784934  | 0.927761  |
| Zdhhc4_j1     | 2.86657     | 0.667379    | 0            | 1         | 1         |
| Zdhhc4        | 4.90953     | 2.76073     | 0            | 1         | 1         |
| Rac1_j4       | 6.77858     | 0           | 0            | 1         | 1         |
| Rac1          | 23.0209     | 23.2623     | 0            | 1         | 1         |
| Usp42         | 1.6671      | 1.80626     | 0            | 1         | 1         |
| Aimp2         | 7.75422     | 10.285      | 0            | 1         | 1         |
| Aimp2         | 9.91305     | 10.4636     | 0            | 1         | 1         |
| Ccz1_j1       | 1.45855     | 3.50821     | 1.2662       | 6.10E-06  | 0.0002015 |
| Ccz1          | 14.0648     | 11.9329     | -0.237144    | 0.0488266 | 0.254579  |
| Tecpr1_j4     | 2.37217     | 3.14679     | 0            | 1         | 1         |
| Tmem130       | 2.67128     | 1.94535     | 0            | 1         | 1         |
| Smurf1        | 1.8034      | 1.10655     | 0            | 1         | 1         |
| Smurf1_j1     | 0.293506    | 0.0224984   | 0            | 1         | 1         |
| Pdap1         | 2.50552     | 0.828747    | 0            | 1         | 1         |
| Atp5j2        | 45.8048     | 48.3226     | 0.0771991    | 0.472744  | 0.769673  |
| Zkscan14      | 0.573448    | 6.91E-05    | -13.018      | 0.928195  | 0.977819  |
| Rnf6          | 9.04965     | 9.01003     | 0            | 1         | 1         |
| Rnf6          | 8.53151     | 6.90952     | 0            | 1         | 1         |
| Usp12         | 9.37564     | 8.21063     | 0            | 1         | 1         |
| Mtif3         | 3.21312     | 2.75257     | 0            | 1         | 1         |
| Mtif3         | 1.90786     | 2.16751     | 0            | 1         | 1         |
| XLOC_026263   | 0.128956    | 0.0491239   | -1.39238     | 0.141042  | 1         |
| Ln timer_j2   | 1.62891     | 1.4459      | 0            | 1         | 1         |
| Flt3          | 6.8367      | 5.02379     | -0.444525    | 0.0001762 | 0.0034613 |
| Flt1          | 0.000185564 | 0.147994    | 9.6394       | 0.50172   | 1         |
| Flt1          | 0.998508    | 0.83348     | -0.260626    | 0.263443  | 0.612269  |
| Slc7a1_j1     | 2.81327     | 1.51131     | 0            | 1         | 1         |
| Slc7a1        | 10.2592     | 10.586      | 0            | 1         | 1         |
| Ubl3_j2       | 0.352799    | 0           | 0            | 1         | 1         |
| Ubl3          | 28.2822     | 22.0315     | 0            | 1         | 1         |
| Katnal1_j5    | 0.109644    | 0           | 0            | 1         | 1         |

|                  |           |            |               |           |           |
|------------------|-----------|------------|---------------|-----------|-----------|
| Katnal1_j6       | 1.84099   | 1.78216    | 0             | 1         | 1         |
| Katnal1          | 4.51833   | 2.57321    | 0             | 1         | 1         |
| AK079377_j1      | 0.125705  | 0.0569181  | -1.14308      | 0.249825  | 1         |
| AK007907         | 0.172367  | 0.201934   | 0.228402      | 0.791296  | 0.930476  |
| AK036974         | 0.139993  | 0.160842   | 0.200287      | 0.732088  | 0.905282  |
| Gm15411_j2       | 0         | 0.218556   | 1.79769e+308  | 0.005392  | 0.0537202 |
| Gm15411_j3       | 0.367268  | 0.168297   | -1.12582      | 0.207753  | 0.552085  |
| Hmgb1_j1         | 5.59634   | 5.92597    | 0.0825673     | 0.465128  | 0.765045  |
| Hsph1            | 10.3842   | 8.82842    | 0             | 1         | 1         |
| Gm5              | 1.06427   | 0.850096   | -0.324167     | 0.333541  | 0.67451   |
| N4bp2l2_j2       | 0.958681  | 0.890074   | -0.107125     | 0.659211  | 0.870627  |
| Stard13_j3       | 0.217777  | 0          | 0             | 1         | 1         |
| Stard13          | 3.4135    | 4.26482    | 0             | 1         | 1         |
| Rfc3             | 3.1513    | 3.06386    | -0.0405957    | 0.840857  | 0.94973   |
| Rfc3_j1          | 0.376976  | 0.542828   | 0.52602       | 0.606324  | 0.844955  |
| Pex1_j1          | 1.85608   | 1.8397     | -0.0127875    | 0.917907  | 0.974435  |
| Krit1_j4         | 8.79691   | 8.51933    | 0             | 1         | 1         |
| Akap9_j4         | 0.980217  | 1.06764    | 0             | 1         | 1         |
| Gm8773_j1        | 1.23538   | 1.79887    | 0.542133      | 0.0744814 | 0.329108  |
| Slc25a40_j3      | 0.0717147 | 0.0567336  | -0.338065     | 0.879167  | 1         |
| Abcb4            | 1.90872   | 1.64813    | 0             | 1         | 1         |
| 9330182L06Rik_j4 | 2.50048   | 2.97129    | 0             | 1         | 1         |
| XLOC_025099      | 0.59401   | 0.727896   | 0.293247      | 0.584444  | 0.833461  |
| XLOC_025101      | 40.3649   | 41.5484    | 0.0416904     | 0.815553  | 0.93995   |
| XLOC_025101      | 8.11922   | 7.28726    | -0.155964     | 0.596376  | 0.83935   |
| Pclo_j6          | 0.563155  | 0.49699    | 0             | 1         | 1         |
| Cacna2d1_j1      | 5.79478   | 15.8646    | 0             | 1         | 1         |
| Magi2_j6         | 0         | 0.0632735  | 1.79769e+308  | 0.0358968 | 1         |
| Magi2_j5         | 0.246727  | 0.144253   | -0.774316     | 0.197634  | 0.540632  |
| Pion_j3          | 0.334691  | 0.10373    | 0             | 1         | 1         |
| Pion_j6          | 0.985541  | 0.938772   | 0             | 1         | 1         |
| Pion_j5          | 0.496511  | 0.496484   | 0             | 1         | 1         |
| Armc10_j2        | 0.10894   | 0.131663   | 0.273312      | 0.731227  | 1         |
| Armc10_j3        | 0.133924  | 0.00165964 | -6.3344       | 0.704904  | 1         |
| Rint1            | 2.39603   | 3.03863    | 0             | 1         | 1         |
| Nos3_j2          | 0.0612664 | 0          | -1.79769e+308 | 0.136891  | 1         |
| Slc4a2_j3        | 0         | 0.133925   | 0             | 1         | 1         |
| 1700096K18Rik    | 0.877445  | 0.891289   | 0.0225845     | 0.93379   | 0.979901  |
| Actr3b_j3        | 16.2468   | 14.9877    | 0             | 1         | 1         |
| Gm7361_j5        | 0.161666  | 0.0491732  | -1.71707      | 0.104978  | 0.402248  |
| Rbm33_j4         | 0.222415  | 0.392825   | 0             | 1         | 1         |
| Rbm33_j5         | 0.0855594 | 0          | 0             | 1         | 1         |
| 9530036O11Rik_j1 | 0.0734548 | 0.0696781  | -0.0761509    | 0.942442  | 1         |
| Ube3c_j6         | 3.56599   | 5.92661    | 0             | 1         | 1         |
| Ilf6             | 0.108336  | 0.0244422  | -2.14807      | 0.379546  | 1         |
| Hadhb_j5         | 3.5692    | 3.81203    | 0.0949569     | 0.792665  | 0.931005  |
| Ept1_j4          | 1.95131   | 2.32798    | 0             | 1         | 1         |

|                  |           |           |               |           |           |
|------------------|-----------|-----------|---------------|-----------|-----------|
| Gm1060_j1        | 1.06E-05  | 0.0803365 | 12.8821       | 0.984452  | 1         |
| Tmem214_j1       | 2.273     | 2.99613   | 0.398498      | 0.0047591 | 0.0488843 |
| Tmem214_j7       | 6.68932   | 6.61186   | -0.0168037    | 0.875519  | 0.960411  |
| Abhd1_j6         | 0.0541619 | 0.157769  | 1.54246       | 0.0038513 | 0.041732  |
| Cad_j2           | 1.0232    | 1.29117   | 0             | 1         | 1         |
| Cad_j5           | 0         | 0.130832  | 0             | 1         | 1         |
| Snx17_j1         | 6.53492   | 6.82843   | 0             | 1         | 1         |
| Nrbp1_j5         | 8.71638   | 8.80138   | 0             | 1         | 1         |
| Nrbp1_j11        | 0.0800707 | 0.028249  | 0             | 1         | 1         |
| Zfp512_j5        | 4.91005   | 5.11869   | 0             | 1         | 1         |
| Gpn1_j1          | 1.26481   | 1.01797   | -0.313219     | 0.413542  | 0.732302  |
| Gpn1_j2          | 6.42651   | 6.49007   | 0.0141978     | 0.941961  | 0.982346  |
| Slc4a1ap_j2      | 2.56122   | 3.0242    | 0             | 1         | 1         |
| Ppp1cb_j3        | 50.8402   | 49.3214   | 0             | 1         | 1         |
| Yes1_j3          | 0.329868  | 0.36874   | 0.160716      | 0.694542  | 0.887364  |
| Ywhah_j3         | 212.322   | 267.793   | 0             | 1         | 1         |
| 4933407H18Rik_j3 | 0.638505  | 0.69093   | 0.113843      | 0.610276  | 0.846482  |
| Fgfr3_j5         | 0         | 0.138867  | 1.79769e+308  | 0.0030069 | 1         |
| Whsc1_j6         | 2.35932   | 2.58769   | 0             | 1         | 1         |
| Nat8l_j2         | 1.61417   | 1.18941   | 0             | 1         | 1         |
| XLOC_025191      | 0.209162  | 0.139887  | 0             | 1         | 1         |
| XLOC_025191      | 0.53077   | 0.47569   | 0             | 1         | 1         |
| Rnf4             | 1.6094    | 1.7267    | 0.101502      | 0.492724  | 0.781218  |
| Fam193a_j2       | 2.45458   | 2.40082   | -0.0319466    | 0.845905  | 0.95135   |
| Sh3bp2           | 0.430991  | 0.660246  | 0.615346      | 0.0623964 | 0.295626  |
| Add1_j2          | 0.746099  | 0.455046  | 0             | 1         | 1         |
| Add1_j5          | 4.78553   | 4.42624   | 0             | 1         | 1         |
| Add1_j4          | 9.3796    | 8.40953   | 0             | 1         | 1         |
| Grk4_j3          | 0.0908818 | 8.61E-05  | -10.0436      | 0.917039  | 1         |
| Htt              | 1.18199   | 1.10921   | -0.0916775    | 0.553516  | 0.81725   |
| Htt_j5           | 8.27132   | 8.99697   | 0.121321      | 0.178729  | 0.518255  |
| A930005I04Rik    | 1.55941   | 1.90776   | 0.290878      | 0.259888  | 0.608587  |
| XLOC_025197      | 0.390346  | 0.457302  | 0.228395      | 0.50882   | 0.790568  |
| Dok7             | 0.838259  | 0.525588  | 0             | 1         | 1         |
| Dok7_j2          | 1.3422    | 1.42756   | 0             | 1         | 1         |
| Dok7             | 0.159798  | 0.154942  | 0             | 1         | 1         |
| Dok7_j4          | 0.288894  | 0.235041  | -0.297624     | 0.578719  | 0.830487  |
| Ablim2_j2        | 0.214278  | 0.0233377 | 0             | 1         | 1         |
| Afap1_j7         | 0.52076   | 0.256547  | 0             | 1         | 1         |
| Jakmip1_j1       | 28.9499   | 27.252    | -0.087197     | 0.353176  | 0.689667  |
| Jakmip1_j5       | 0.42538   | 0         | -1.79769e+308 | 4.96E-08  | 2.92E-06  |
| Cyt11            | 0.0108433 | 0.0601544 | 2.47187       | 0.290129  | 1         |
| XLOC_025216      | 0.995979  | 1.36354   | 0.453167      | 0.259481  | 0.608218  |
| Lyar             | 2.20702   | 2.43624   | 0.142556      | 0.551831  | 0.81604   |
| Cc2d2a_j2        | 0.0663752 | 0.0069183 | 0             | 1         | 1         |
| Cc2d2a_j8        | 0.537089  | 0.528548  | 0             | 1         | 1         |
| Slit2_j7         | 0.262103  | 0.355989  | 0             | 1         | 1         |

|                  |           |           |            |           |           |
|------------------|-----------|-----------|------------|-----------|-----------|
| Pacrgl           | 1.68792   | 1.92787   | 0          | 1         | 1         |
| 9230114K14Rik_j4 | 1.23139   | 1.04223   | -0.240617  | 0.301434  | 0.647787  |
| Zcchc4_j3        | 0.6556    | 1.16585   | 0.830495   | 0.0465732 | 0.247407  |
| Rbpj_j1          | 5.88463   | 6.5922    | 0.163809   | 0.15274   | 0.484689  |
| Tbc1d19_j5       | 14.105    | 15.1913   | 0          | 1         | 1         |
| Pcdh7            | 1.25802   | 1.23917   | 0          | 1         | 1         |
| Pcdh7_j4         | 0.391147  | 0.371452  | 0          | 1         | 1         |
| 0610040J01Rik_j1 | 0.363023  | 0.205409  | -0.821561  | 0.227578  | 0.574755  |
| Pgm1_j4          | 0.210196  | 0.0884504 | -1.24879   | 0.186895  | 0.527882  |
| Pgm1_j9          | 0.625584  | 0.859875  | 0.458923   | 0.164612  | 0.500613  |
| Tbc1d1_j6        | 4.45389   | 4.43688   | 0          | 1         | 1         |
| Klhl5_j1         | 0.137011  | 0.196658  | 0          | 1         | 1         |
| XLOC_025269      | 0.0763195 | 0.0596038 | -0.356647  | 0.850948  | 1         |
| Ube2k_j3         | 4.54645   | 4.62032   | 0          | 1         | 1         |
| Nsun7_j4         | 0.0993334 | 0.132128  | 0.411588   | 0.577944  | 1         |
| Uchl1_j1         | 0.111718  | 0.122971  | 0          | 1         | 1         |
| Uchl1_j5         | 18.5696   | 45.4121   | 0          | 1         | 1         |
| Limch1_j5        | 2.47985   | 2.40968   | 0          | 1         | 1         |
| XLOC_025279      | 0.0695192 | 0.0266177 | -1.38503   | 0.443579  | 1         |
| XLOC_025280      | 0.213549  | 0.124636  | -0.776846  | 0.509682  | 0.790813  |
| AK035785_j1      | 0.121609  | 0.0831654 | -0.548194  | 0.623344  | 1         |
| Guf1             | 0.844545  | 0.717962  | -0.234267  | 0.276428  | 0.625264  |
| Fip1l1           | 3.17091   | 3.20099   | 0          | 1         | 1         |
| Kit              | 4.83374   | 4.83288   | 0          | 1         | 1         |
| Kit_j3           | 4.44754   | 5.55285   | 0          | 1         | 1         |
| Kit_j4           | 0.300487  | 0.501044  | 0          | 1         | 1         |
| Srd5a3_j3        | 19.289    | 18.1096   | -0.0910235 | 0.477551  | 0.77269   |
| Gm7271_j2        | 7.37521   | 4.39996   | 0          | 1         | 1         |
| XLOC_025310      | 0.0877137 | 0.0915834 | 0          | 1         | 1         |
| Exoc1_j5         | 0.395678  | 0.439392  | 0          | 1         | 1         |
| Cep135_j1        | 0.0369257 | 0.145246  | 1.9758     | 0.111016  | 1         |
| Cep135_j9        | 0.209988  | 0.187282  | -0.165094  | 0.800296  | 0.933449  |
| Cep135_j11       | 0.483139  | 0.422527  | -0.193396  | 0.598938  | 0.84111   |
| C530008M17Rik_j1 | 0         | 0.412648  | 0          | 1         | 1         |
| C530008M17Rik_j9 | 0.178299  | 0.0130828 | 0          | 1         | 1         |
| Paics            | 1.59953   | 1.21574   | 0          | 1         | 1         |
| Lphn3_j10        | 0.164461  | 0.165298  | 0.00731905 | 0.987082  | 0.996282  |
| Ythdc1_j5        | 0.406184  | 0.96086   | 1.24219    | 0.0070515 | 0.0662511 |
| Ythdc1_j8        | 0.313117  | 1.1926    | 1.92934    | 0.0292505 | 0.182503  |
| Rufy3_j1         | 6.54268   | 1.92034   | 0          | 1         | 1         |
| Rufy3_j2         | 1.22775   | 6.41724   | 0          | 1         | 1         |
| Rufy3_j3         | 1.15691   | 0.801465  | 0          | 1         | 1         |
| Slc4a4           | 3.89429   | 3.04522   | 0          | 1         | 1         |
| Mthfd2l_j3       | 0.0471802 | 0.0407831 | -0.210211  | 0.879795  | 1         |
| Mthfd2l_j6       | 2.00311   | 1.81837   | -0.139597  | 0.678023  | 0.878946  |
| Uso1_j2          | 6.86963   | 6.72466   | 0          | 1         | 1         |
| Sept11           | 10.6543   | 11.7826   | 0          | 1         | 1         |



|                  |            |                 |            |           |           |
|------------------|------------|-----------------|------------|-----------|-----------|
| Fras1_j9         | 0.276087   | 0.315203        | 0.191157   | 0.661032  | 0.871471  |
| Anxa3_j2         | 0.0554311  | 0.181912        | 1.71447    | 0.187019  | 0.528005  |
| Prdm8_j3         | 1.48345    | 2.24628         | 0          | 1         | 1         |
| 1700007G11Rik    | 0.225531   | 0.201425        | -0.163087  | 0.849113  | 0.952225  |
| 4930524J08Rik    | 0.223973   | 0.221991        | -0.0128213 | 0.988326  | 0.996486  |
| Agpat9_j3        | 0.065393   | 0 -1.79769e+308 |            | 0.0073379 | 1         |
| Agpat9           | 0.082474   | 0.234348        | 1.50664    | 0.0142616 | 0.110939  |
| Cds1_j3          | 0.238782   | 0.192085        | 0          | 1         | 1         |
| Ptpn13_j5        | 0.931815   | 0.667517        | -0.481238  | 0.038344  | 0.21782   |
| Ptpn13_j6        | 0.276199   | 0.0971012       | -1.50815   | 0.0022135 | 0.0270197 |
| Aff1_j3          | 4.02884    | 4.18936         | 0          | 1         | 1         |
| Pkd2_j4          | 0.0931257  | 1.00109         | 0          | 1         | 1         |
| Pkd2_j2          | 1.43604    | 0.926778        | 0          | 1         | 1         |
| Pkd2_j3          | 0.956898   | 0.789956        | 0          | 1         | 1         |
| Lrrc8d_j1        | 0.104603   | 0.0576982       | 0          | 1         | 1         |
| Lrrc8d_j2        | 0.19516    | 0.122763        | 0          | 1         | 1         |
| Lrrc8d_j5        | 0.512941   | 0.264049        | 0          | 1         | 1         |
| AK085824_j1      | 0.0595433  | 0.0385498       | -0.627218  | 0.672083  | 1         |
| XLOC_025384      | 0.0498247  | 0.0951005       | 0.932591   | 0.459415  | 1         |
| A830010M20Rik_j1 | 3.8322     | 6.82802         | 0.833295   | 5.03E-11  | 5.43E-09  |
| Rpap2_j1         | 1.89979    | 2.04281         | 0.104714   | 0.627955  | 0.855072  |
| Rpl5_j5          | 0          | 0.049147        | 0          | 1         | 1         |
| Mtf2_j1          | 1.07288    | 1.07252         | 0          | 1         | 1         |
| AK141638_j6      | 0.00371847 | 0.643058        | 0          | 1         | 1         |
| AK141638_j5      | 1.98326    | 2.27206         | 0          | 1         | 1         |
| AK141638_j7      | 0.640439   | 0.717873        | 0          | 1         | 1         |
| Pcgf3_j1         | 8.71963    | 8.47912         | -0.0403529 | 0.738727  | 0.908177  |
| Idua             | 0.0234332  | 0.056675        | 0          | 1         | 1         |
| Zfp932_j2        | 0.394183   | 0.635148        | 0          | 1         | 1         |
| Zfp605_j3        | 0.174037   | 0.135464        | 0          | 1         | 1         |
| Chfr_j2          | 0.283253   | 0.467862        | 0.723994   | 0.131481  | 0.451384  |
| Chfr_j3          | 2.48826    | 2.63435         | 0.0823084  | 0.697707  | 0.888632  |
| Ankle2           | 1.51713    | 1.80268         | 0          | 1         | 1         |
| Pitpnb_j1        | 0.656556   | 0.883595        | 0.428466   | 0.427635  | 0.741838  |
| Crybb1_j1        | 0.13066    | 0.0939666       | -0.475598  | 0.766977  | 1         |
| Hps4_j2          | 1.27512    | 1.10729         | 0          | 1         | 1         |
| Gm3511           | 16.0537    | 20.2593         | 0          | 1         | 1         |
| Iscu_j6          | 3.41019    | 2.9552          | -0.206598  | 0.439439  | 0.748957  |
| Iscu_j2          | 2.78934    | 2.18576         | -0.351786  | 0.188051  | 0.529255  |
| Usp30_j1         | 0          | 0.1383          | 0          | 1         | 1         |
| Usp30_j3         | 2.96247    | 3.96468         | 0          | 1         | 1         |
| Ung              | 0.0467405  | 0.210386        | 2.17029    | 0.0623865 | 0.295626  |
| Ube3b_j3         | 8.48665    | 5.14159         | 0          | 1         | 1         |
| Tchp             | 0.5577     | 1.01037         | 0.857328   | 0.0147487 | 0.113519  |
| Tchp_j2          | 1.07644    | 0.836572        | -0.363712  | 0.350306  | 0.687781  |
| Oasl2_j1         | 3.34297    | 4.80555         | 0          | 1         | 1         |
| Sppl3_j3         | 3.34887    | 2.2948          | -0.545308  | 0.192472  | 0.534679  |

|                  |             |            |               |           |           |
|------------------|-------------|------------|---------------|-----------|-----------|
| Pop5_j1          | 0.640906    | 0.557113   | 0             | 1         | 1         |
| Coq5             | 12.6517     | 14.4066    | 0.187407      | 0.0411982 | 0.22826   |
| Pxn              | 0.844722    | 0.907809   | 0             | 1         | 1         |
| Pxn_j1           | 0.312019    | 0.659368   | 0             | 1         | 1         |
| Gcn11l_j3        | 2.33875     | 2.6445     | 0             | 1         | 1         |
| Gcn11l_j7        | 0.0966382   | 0.370277   | 0             | 1         | 1         |
| Rab35_j1         | 0.865027    | 1.23883    | 0.518157      | 0.204538  | 0.54869   |
| XLOC_025452      | 3.0276      | 3.43371    | 0.181595      | 0.324495  | 0.667503  |
| B230112J18Rik_j1 | 0.0877975   | 0.0175263  | -2.32466      | 0.289748  | 1         |
| XLOC_025455      | 0.408788    | 0.471876   | 0             | 1         | 1         |
| Taok3_j2         | 0.122343    | 0.0265043  | 0             | 1         | 1         |
| Taok3_j4         | 1.69642     | 1.28492    | 0             | 1         | 1         |
| Vsig10_j4        | 1.00952     | 1.10961    | 0.136382      | 0.575331  | 0.82827   |
| Wsb2             | 8.29358     | 8.45292    | 0             | 1         | 1         |
| Wsb2_j3          | 37.2771     | 39.1901    | 0             | 1         | 1         |
| Fbxo21           | 12.8419     | 9.10503    | 0             | 1         | 1         |
| Fbxo21_j3        | 5.42366     | 5.49471    | 0             | 1         | 1         |
| Tesc_j3          | 6.44428     | 5.40443    | 0             | 1         | 1         |
| Tesc             | 2.86742     | 1.26066    | 0             | 1         | 1         |
| Med13l_j9        | 0.828084    | 0.668      | 0             | 1         | 1         |
| Tbx3_j1          | 1.51271     | 1.56672    | 0             | 1         | 1         |
| Tbx3_j2          | 0.049748    | 0.0718271  | 0             | 1         | 1         |
| Slc24a6          | 0.644442    | 0.684838   | 0.0877113     | 0.834981  | 0.946943  |
| Gm15800_j5       | 0.240004    | 0.283759   | 0.241608      | 0.366761  | 0.700273  |
| Gm15800_j2       | 9.18217     | 7.75412    | -0.243871     | 0.0070195 | 0.0659957 |
| Atxn2_j5         | 0.714769    | 0.779914   | 0             | 1         | 1         |
| Myl2_j2          | 3.03E-05    | 0.403248   | 13.6984       | 0.993216  | 0.997985  |
| Ppp1cc_j1        | 1.38261     | 1.2193     | -0.181335     | 0.698813  | 0.889051  |
| Pptc7_j1         | 1.22667     | 1.51072    | 0.300487      | 0.207699  | 0.552017  |
| Vps29_j1         | 48.6161     | 45.8128    | -0.0856847    | 0.478885  | 0.773346  |
| P2rx7            | 0.880302    | 1.12625    | 0             | 1         | 1         |
| P2rx7_j2         | 0           | 0.117216   | 0             | 1         | 1         |
| Rnf34_j1         | 14.8034     | 15.7861    | 0.0927262     | 0.434068  | 0.745221  |
| AK079939_j1      | 0.154672    | 0.144588   | -0.0972596    | 0.923395  | 0.97612   |
| XLOC_025494      | 0.0677396   | 0.00125541 | -5.75377      | 0.629465  | 1         |
| XLOC_025495      | 0.0714648   | 0.0715339  | 0.00139405    | 0.998767  | 1         |
| Setd1b           | 1.14723     | 1.04048    | 0             | 1         | 1         |
| mKIAA1076_j2     | 2.07347     | 1.96112    | 0             | 1         | 1         |
| Psm9_j2          | 4.099       | 3.3445     | -0.293484     | 0.315006  | 0.659071  |
| Wdr66_j2         | 0.292735    | 0.223481   | -0.389443     | 0.385397  | 0.714041  |
| Ogfod2_j2        | 9.36558     | 10.3449    | 0.143481      | 0.24323   | 0.590533  |
| Setd8_j1         | 0.468974    | 0.30031    | 0             | 1         | 1         |
| Gtf2h3_j2        | 0.229197    | 0.227417   | -0.0112487    | 0.990227  | 0.997044  |
| Dnahc10_j5       | 0.116337    | 0.129191   | 0.151188      | 0.843492  | 1         |
| Dnahc10_j7       | 0.0407025   | 0.131119   | 1.68768       | 0.151617  | 1         |
| Dnahc10_j10      | 0.0860381   | 0          | -1.79769e+308 | 0.0088235 | 1         |
| Fam101a_j1       | 0.000737424 | 0.509439   | 9.4322        | 0.413058  | 0.73195   |

|                  |           |                      |            |           |           |
|------------------|-----------|----------------------|------------|-----------|-----------|
| Gpr133           | 1.66196   | 4.51988              | 1.4434     | 0         | 0         |
| Sfswap           | 5.60078   | 5.93806              | 0          | 1         | 1         |
| Srsf8_j6         | 0.880696  | 0.798837             | 0          | 1         | 1         |
| Srsf8_j7         | 0.483376  | 0.662952             | 0          | 1         | 1         |
| Gbas_j1          | 6.36789   | 5.4274               | -0.230555  | 0.196741  | 0.539504  |
| Cct6a_j1         | 30.1706   | 33.9201              | 0          | 1         | 1         |
| Vkorc1l1         | 0.728731  | 0.838392             | 0          | 1         | 1         |
| Rabgef1_j2       | 8.95517   | 7.534                | 0          | 1         | 1         |
| Tyw1_j1          | 0.18571   | 0.123766             | -0.58544   | 0.500485  | 0.785042  |
| Caln1            | 0.622331  | 0.304798             | 0          | 1         | 1         |
| Gtf2ird2         | 0.603723  | 0.771209             | 0          | 1         | 1         |
| Wbscr27_j1       | 0.228528  | 0.389204             | 0.768156   | 0.412442  | 0.731438  |
| Wbscr27          | 2.88069   | 1.47941              | -0.961394  | 0.0035154 | 0.0390655 |
| Wbscr27_j8       | 0.295835  | 0.257721             | -0.198982  | 0.825729  | 0.943781  |
| Wbscr27_j7       | 0.463249  | 0.442438             | -0.0663109 | 0.922485  | 0.975867  |
| Abhd11           | 0.7567    | 0.80799              | 0.0946156  | 0.701399  | 0.890328  |
| Stx1a_j1         | 3.71884   | 5.76846              | 0.633335   | 0.001879  | 0.0237702 |
| Bcl7b_j2         | 0.616834  | 0                    | 0          | 1         | 1         |
| Baz1b_j3         | 5.21893   | 5.21554              | 0          | 1         | 1         |
| Nsun5            | 3.38067   | 3.71844              | 0          | 1         | 1         |
| Rhbdd2_j1        | 19.5466   | 17.3947              | 0          | 1         | 1         |
| Por_j2           | 5.06626   | 6.28881              | 0          | 1         | 1         |
| 2900083l11Rik_j3 | 2.65699   | 3.50685              | 0.400383   | 0.0793005 | 0.341916  |
| Dtx2_j1          | 0.308339  | 0.412277             | 0          | 1         | 1         |
| Rasa4_j4         | 0.455163  | 0.505642             | 0.151732   | 0.720983  | 0.900148  |
| Rasa4_j2         | 0.261942  | 0.160732             | -0.704587  | 0.313953  | 0.658288  |
| XLOC_025573      | 0.133187  | 0.0577799            | -1.20482   | 0.57072   | 1         |
| Rab15_j1         | 8.85866   | 9.8347               | 0.150793   | 0.421579  | 0.737767  |
| Fis1             | 82.5167   | 95.2001              | 0.206277   | 0.035543  | 0.207747  |
| Cldn15_j2        | 0.133986  | 0 -1.79769e+308      | 0.0105579  |           | 1         |
| Cldn15_j3        | 0.138414  | 0.240245             | 0.795515   | 0.381257  | 0.711819  |
| Plod3            | 1.25071   | 1.60728              | 0          | 1         | 1         |
| Plod3_j4         | 9.11332   | 13.3981              | 0          | 1         | 1         |
| Vgf_j6           | 1.43111   | 2.47064              | 0.787754   | 0.0003975 | 0.006737  |
| Vgf_j7           | 0.728422  | 1.8672               | 1.35803    | 9.93E-07  | 4.11E-05  |
| Ache_j2          | 16.305    | 14.9873              | 0          | 1         | 1         |
| Ephb4_j2         | 0.490404  | 0.373783             | -0.391769  | 0.286547  | 0.635383  |
| AK134703_j1      | 0.0673161 | 0.0668515            | -0.0099901 | 0.993025  | 1         |
| Lrch4            | 1.55957   | 3.05719              | 0          | 1         | 1         |
| Ap4m1            | 1.64209   | 1.73758              | 0          | 1         | 1         |
| Cnpy4_j1         | 2.39831   | 2.66168              | 0.150322   | 0.392794  | 0.718937  |
| Fam20c_j3        | 0         | 3.20597 1.79769e+308 |            | 1.22E-14  | 2.30E-12  |
| Sun1_j15         | 6.39246   | 7.45171              | 0.2212     | 0.129027  | 0.447615  |
| Elfn1_j2         | 9.61106   | 9.37438              | -0.0359723 | 0.734129  | 0.90626   |
| XLOC_025616      | 0.0195025 | 0.0872122            | 2.16087    | 0.063078  | 1         |
| Chst12_j3        | 1.3681    | 0.0947283            | 0          | 1         | 1         |
| AA881470         | 8.06828   | 9.7196               | 0.268637   | 0.0138535 | 0.108639  |

|                  |           |             |               |           |           |
|------------------|-----------|-------------|---------------|-----------|-----------|
| C330006K01Rik    | 1.17996   | 1.29859     | 0             | 1         | 1         |
| Slc29a4_j1       | 1.08152   | 1.28878     | 0             | 1         | 1         |
| Fscn1_j3         | 0.467621  | 0           | 0             | 1         | 1         |
| O610040B10Rik_j1 | 0.832772  | 0.574084    | -0.536659     | 0.329892  | 0.671905  |
| Cyth3_j5         | 5.96451   | 6.3657      | 0             | 1         | 1         |
| Rsph10b2         | 0         | 0.187414    | 1.79769e+308  | 0.106663  | 0.405742  |
| Bri3_j1          | 0.161064  | 0.147996    | -0.122073     | 0.902566  | 0.968961  |
| Trrap_j8         | 1.06472   | 0.858286    | -0.310947     | 0.104484  | 0.401025  |
| Trrap_j7         | 0.294808  | 0.306554    | 0.0563639     | 0.854402  | 0.953902  |
| Trrap_j6         | 0.203083  | 0.186494    | -0.12294      | 0.741484  | 0.909295  |
| Trrap_j5         | 0.910564  | 0.876816    | -0.0544861    | 0.779561  | 0.925607  |
| Arpc1b_j1        | 59.5423   | 79.957      | 0             | 1         | 1         |
| Cpsf4_j1         | 0.540988  | 0.963975    | 0.833398      | 0.0279706 | 0.177379  |
| Zkscan5_j1       | 0.112598  | 0.337983    | 0             | 1         | 1         |
| Zfp655           | 4.89891   | 5.78371     | 0.239533      | 0.168974  | 0.505754  |
| Zfp498_j2        | 0.241811  | 0.155195    | -0.639805     | 0.332703  | 0.67386   |
| Cdk8_j4          | 0.0908507 | 0.225619    | 1.31232       | 0.383147  | 0.712878  |
| Cdk8_j5          | 0.844483  | 0.938672    | 0.152553      | 0.723332  | 0.901484  |
| Cdk8_j6          | 0.70486   | 0.512519    | -0.459732     | 0.393546  | 0.719561  |
| Wasf3_j1         | 0.463785  | 0.572673    | 0             | 1         | 1         |
| Rpl21_j1         | 1.38345   | 1.8273      | 0             | 1         | 1         |
| XLOC_025661      | 0.160829  | 0.10428     | -0.625072     | 0.755978  | 0.915846  |
| XLOC_025663      | 0.0777626 | 0.0478982   | -0.699104     | 0.44744   | 1         |
| Pan3_j6          | 0         | 0.0886325   | 0             | 1         | 1         |
| Pomp_j2          | 30.5342   | 42.8715     | 0             | 1         | 1         |
| Mtus2_j2         | 0.108195  | 0           | 0             | 1         | 1         |
| Usp1             | 0.615401  | 0.000310577 | 0             | 1         | 1         |
| AK009869_j3      | 0.0636665 | 0           | -1.79769e+308 | 0.0362894 | 1         |
| AK009869_j2      | 0         | 0.0577396   | 1.79769e+308  | 0.106029  | 1         |
| Alox5ap_j2       | 0.742028  | 0.585778    | -0.341119     | 0.6011    | 0.841992  |
| Alox5ap_j3       | 0.253558  | 0.771124    | 1.60465       | 0.0115734 | 0.0955056 |
| XLOC_025673      | 0.0877706 | 0.0579622   | -0.598625     | 0.615106  | 1         |
| XLOC_025674      | 0.184395  | 0.682771    | 1.8886        | 0.152765  | 0.484703  |
| XLOC_025674      | 0.130073  | 0.129299    | -0.00861897   | 0.994635  | 1         |
| AK138849_j2      | 0.185007  | 0.448437    | 1.27733       | 0.0229557 | 0.154886  |
| 6330406I15Rik_j1 | 0.194566  | 0.0171655   | -3.50268      | 0.0321254 | 0.194416  |
| Fry              | 7.50673   | 7.7893      | 0             | 1         | 1         |
| Fry_j11          | 5.57744   | 5.0041      | 0             | 1         | 1         |
| Pds5b            | 4.28452   | 3.65507     | 0             | 1         | 1         |
| Mterf            | 0.910164  | 0.857851    | -0.0854002    | 0.821994  | 0.942583  |
| Cyp51_j1         | 0.650976  | 0.691029    | 0             | 1         | 1         |
| A330021E22Rik_j4 | 0.301678  | 0.206788    | -0.544858     | 0.29404   | 0.640886  |
| Adam22_j1        | 0.120241  | 0.119       | -0.0149648    | 0.967108  | 1         |
| Adam22_j3        | 6.68669   | 5.4342      | -0.299225     | 0.0013896 | 0.0186173 |
| Rundc3b_j1       | 3.75567   | 3.86602     | 0             | 1         | 1         |
| Crot_j4          | 3.18603   | 3.47852     | 0             | 1         | 1         |
| Crot_j3          | 18.1246   | 17.9408     | 0             | 1         | 1         |

|                  |           |                 |            |           |           |
|------------------|-----------|-----------------|------------|-----------|-----------|
| Dmtf1            | 1.32734   | 1.44933         | 0          | 1         | 1         |
| Cd36_j1          | 0.121246  | 0 -1.79769e+308 | 0.0175696  |           | 1         |
| Gnai1_j1         | 16.6576   | 13.985          | 0          | 1         | 1         |
| AK046351_j2      | 0.0569556 | 0.0615278       | 0.1114     | 0.890108  | 1         |
| AK046351_j5      | 0.247828  | 0.239812        | -0.0474368 | 0.944166  | 0.983317  |
| Phtf2_j1         | 0.185725  | 0.193889        | 0.0620627  | 0.908619  | 0.971192  |
| Rsb1l_j3         | 0.962566  | 1.33256         | 0          | 1         | 1         |
| Rsb1l            | 1.06361   | 0.458815        | 0          | 1         | 1         |
| Ptpn12_j2        | 2.64804   | 3.16422         | 0          | 1         | 1         |
| Ptpn12_j1        | 4.7089    | 4.5821          | 0          | 1         | 1         |
| Fbxl13_j1        | 8.14399   | 6.70636         | -0.280207  | 0.251677  | 0.599616  |
| Napepld          | 0.409508  | 0.393131        | -0.0588813 | 0.877237  | 0.96086   |
| Napepld          | 1.00695   | 1.34351         | 0.416005   | 0.0560923 | 0.277016  |
| Reln_j1          | 4.34098   | 5.17646         | 0.253946   | 0.203024  | 0.546925  |
| Orc5_j2          | 6.97632   | 10.1302         | 0.538124   | 6.75E-05  | 0.0015403 |
| Orc5_j6          | 7.29214   | 5.41886         | -0.428353  | 0.0510787 | 0.261892  |
| A930003O13Rik    | 1.09505   | 0.862475        | -0.34444   | 0.303247  | 0.64898   |
| A930003O13Rik_j1 | 0.0627021 | 0.0395721       | -0.66403   | 0.550444  | 1         |
| Pus7             | 1.44843   | 1.30506         | -0.150364  | 0.475982  | 0.771778  |
| Fam126a_j1       | 0.139523  | 0.268324        | 0          | 1         | 1         |
| XLOC_025735      | 0.419255  | 0.403985        | -0.0535271 | 0.896213  | 0.967019  |
| Kcnh2_j2         | 12.2034   | 10.3146         | 0          | 1         | 1         |
| Tmub1_j2         | 10.6188   | 10.6936         | 0.0101302  | 0.944945  | 0.983684  |
| Gbx1_j3          | 0.0349686 | 0.159394        | 0          | 1         | 1         |
| Abcf2_j2         | 0.583926  | 0.810577        | 0.473165   | 0.0224429 | 0.15274   |
| Prkag2_j5        | 9.82152   | 16.8583         | 0          | 1         | 1         |
| Prkag2_j7        | 4.76717   | 5.20228         | 0          | 1         | 1         |
| Prkag2_j6        | 4.9287    | 9.62578         | 0          | 1         | 1         |
| Xrcc2_j2         | 0.38891   | 0.351567        | -0.145636  | 0.7481    | 0.912349  |
| Paxip1_j3        | 2.73391   | 2.71522         | 0          | 1         | 1         |
| Paxip1_j4        | 0.258027  | 0.411505        | 0          | 1         | 1         |
| Paxip1_j5        | 0.0334123 | 0.0494597       | 0          | 1         | 1         |
| Tyms_j2          | 0.11803   | 0 -1.79769e+308 | 0.0449769  |           | 1         |
| Tyms             | 0.365569  | 0.464717        | 0.346211   | 0.535352  | 0.806229  |
| Hadha_j1         | 0.293181  | 0.866729        | 0          | 1         | 1         |
| Slc5a6_j4        | 0.270726  | 0 -1.79769e+308 | 0.0052681  |           | 0.052712  |
| Slc5a6_j6        | 1.47117   | 1.00645         | -0.547682  | 0.274572  | 0.623743  |
| Gtf3c2_j5        | 0.987126  | 0.764001        | 0          | 1         | 1         |
| Ppm1g_j8         | 1.88534   | 2.46911         | 0          | 1         | 1         |
| Ift172_j2        | 0.6455    | 1.09997         | 0          | 1         | 1         |
| Ift172_j3        | 0.061389  | 0.0317034       | 0          | 1         | 1         |
| AK036733_j2      | 0.100329  | 0.112829        | 0.169392   | 0.867132  | 1         |
| Rbks             | 3.02312   | 2.35254         | 0          | 1         | 1         |
| Pisd_j2          | 0.699005  | 0.455619        | 0          | 1         | 1         |
| Pisd_j3          | 0.560699  | 0.720026        | 0          | 1         | 1         |
| Ctbp1            | 51.3709   | 38.3705         | 0          | 1         | 1         |
| Tmem129_j2       | 3.81507   | 4.14153         | 0          | 1         | 1         |

|                  |           |                 |            |           |           |
|------------------|-----------|-----------------|------------|-----------|-----------|
| Haus3            | 4.23253   | 3.50162         | -0.273498  | 0.112077  | 0.416662  |
| Zfyve28_j1       | 17.2749   | 15.6196         | 0          | 1         | 1         |
| Zfyve28_j2       | 18.4163   | 14.0091         | 0          | 1         | 1         |
| Tnip2_j5         | 1.07578   | 1.88078         | 0.805948   | 0.0038247 | 0.0415564 |
| Tnip2            | 0.472332  | 0.933801        | 0.983313   | 0.0003412 | 0.0059303 |
| Mfsd10_j3        | 0.0647928 | 0.0484315       | 0          | 1         | 1         |
| Mfsd10           | 1.45988   | 1.57894         | 0          | 1         | 1         |
| 2310079F23Rik_j6 | 0.537606  | 0.533312        | -0.0115677 | 0.971107  | 0.991879  |
| 2310079F23Rik    | 0.370916  | 0.379975        | 0.0348112  | 0.895889  | 0.96693   |
| Sorcs2_j1        | 0.0959189 | 0.000331802     | 0          | 1         | 1         |
| AK144870_j5      | 0.343449  | 0.189742        | -0.856057  | 0.256157  | 0.604997  |
| AK144870_j1      | 0.817891  | 0.559279        | -0.548342  | 0.179279  | 0.518924  |
| XLOC_025812      | 0.073696  | 0.043175        | -0.771391  | 0.658734  | 1         |
| Man2b2_j1        | 2.7612    | 2.8237          | 0.0322887  | 0.940779  | 0.982026  |
| Wfs1             | 3.99979   | 5.32676         | 0          | 1         | 1         |
| Evc_j4           | 0.0584041 | 0.0434895       | -0.425401  | 0.684847  | 1         |
| Evc              | 0.351615  | 0.0705307       | -2.31767   | 0.0012858 | 0.0174852 |
| Evc_j1           | 0.52374   | 0.450462        | -0.217445  | 0.487177  | 0.778145  |
| Nsg1_j1          | 0.620078  | 0.929764        | 0.584413   | 0.039438  | 0.221931  |
| Wdr1_j2          | 0.617888  | 0.883163        | 0          | 1         | 1         |
| Wdr1_j3          | 30.3638   | 39.484          | 0          | 1         | 1         |
| Hs3st1_j1        | 7.89      | 5.54372         | -0.50917   | 0.0023234 | 0.0281    |
| Bod1l_j5         | 2.62696   | 2.57295         | -0.0299703 | 0.805366  | 0.935633  |
| Bod1l_j9         | 0.802837  | 0.820452        | 0.0313122  | 0.875097  | 0.96023   |
| Gm7854_j1        | 0.114305  | 0.0797098       | -0.520053  | 0.676281  | 1         |
| Prom1_j1         | 0.468844  | 0.741976        | 0.662265   | 0.277135  | 0.626172  |
| Prom1_j2         | 0.313019  | 0.63693         | 1.02489    | 0.029383  | 0.183133  |
| Tapt1_j2         | 0.797539  | 2.00197         | 0          | 1         | 1         |
| Qdpr_j2          | 0         | 0.240306        | 0          | 1         | 1         |
| Fam184b_j2       | 0.889979  | 0.179405        | -2.31055   | 0.0048277 | 0.0493598 |
| Gpr125_j3        | 4.14619   | 4.00251         | 0          | 1         | 1         |
| Gpr125_j6        | 1.12091   | 0.863149        | 0          | 1         | 1         |
| C130083M11Rik_j1 | 0.0882553 | 0.12693         | 0.524274   | 0.414088  | 1         |
| Lgi2_j1          | 0.330207  | 0               | 0          | 1         | 1         |
| Sepsecs_j2       | 0.203877  | 0.160776        | 0          | 1         | 1         |
| Cckar_j1         | 4.24457   | 6.6134          | 0          | 1         | 1         |
| Arap2_j4         | 5.5517    | 3.3227          | 0          | 1         | 1         |
| Arap2_j5         | 0.109736  | 0.796355        | 0          | 1         | 1         |
| Arap2_j8         | 0.485919  | 0 -1.79769e+308 |            | 7.66E-05  | 0.0017075 |
| Rfc1_j1          | 5.20937   | 5.13251         | 0          | 1         | 1         |
| Rfc1             | 1.58609   | 1.39137         | 0          | 1         | 1         |
| Ugdh_j2          | 0.18466   | 0.392851        | 0          | 1         | 1         |
| XLOC_025863      | 1.22425   | 1.03958         | 0          | 1         | 1         |
| Pds5a_j1         | 0         | 0.153666        | 0          | 1         | 1         |
| Bend4_j3         | 0.0779981 | 0.0734333       | 0          | 1         | 1         |
| Bend4_j5         | 0.365002  | 0.191253        | 0          | 1         | 1         |
| Atp8a1_j5        | 2.42617   | 2.52027         | 0          | 1         | 1         |

|              |           |                        |            |           |           |
|--------------|-----------|------------------------|------------|-----------|-----------|
| Gnpda2_j3    | 19.8836   | 35.4981                | 0          | 1         | 1         |
| Gabra2_j4    | 0.553329  | 0.420269               | 0          | 1         | 1         |
| Commd8_j2    | 1.7556    | 1.80791                | 0.0423628  | 0.826998  | 0.94428   |
| Commd8_j3    | 10.0851   | 10.6768                | 0.0822543  | 0.543368  | 0.8108    |
| Nfxl1_j2     | 0.106195  | 0.25576                | 1.26807    | 0.27557   | 0.624571  |
| Tec_j3       | 0.193485  | 0 -1.79769e+308        |            | 0.0001186 | 0.0024789 |
| Fryl_j3      | 3.87342   | 5.18067                | 0          | 1         | 1         |
| Fryl_j4      | 10.8389   | 10.9015                | 0          | 1         | 1         |
| Fryl_j7      | 4.13912   | 3.37895                | 0          | 1         | 1         |
| Sgcb_j1      | 0.0519701 | 0.0994501              | 0.936291   | 0.374767  | 1         |
| LnX1         | 2.97983   | 2.84896                | 0          | 1         | 1         |
| Clock_j2     | 0.638132  | 0.325048               | -0.9732    | 0.228529  | 0.575589  |
| Aasdh_j1     | 3.14712   | 1.97266                | 0          | 1         | 1         |
| AASDH_j1     | 0.765553  | 0.953147               | 0          | 1         | 1         |
| Hopx_j1      | 18.8639   | 19.1107                | 0          | 1         | 1         |
| XLOC_025899  | 0.118713  | 0.0151642              | -2.96874   | 0.0796993 | 1         |
| Igfbp7       | 18.9257   | 22.1602                | 0.227624   | 0.0807575 | 0.345924  |
| Epha5_j6     | 0         | 0.175008 1.79769e+308  |            | 1.97E-05  | 0.0005485 |
| Epha5_j8     | 0.631749  | 0.825599               | 0.386089   | 0.181139  | 0.521088  |
| Cenpc1_j2    | 1.79801   | 1.82527                | 0          | 1         | 1         |
| Cenpc1_j4    | 1.15293   | 1.33589                | 0          | 1         | 1         |
| Uba6_j2      | 0.506766  | 0.14414                | 0          | 1         | 1         |
| Tmprss11c_j4 | 0.874527  | 0.527699               | -0.728789  | 0.0175748 | 0.128649  |
| Igj_j2       | 0.0500416 | 0.0179559              | -1.47867   | 0.440793  | 1         |
| XLOC_025910  | 0.146634  | 0.114312               | -0.359249  | 0.645702  | 0.863371  |
| Adamts3_j4   | 0         | 0.0467862 1.79769e+308 |            | 0.290942  | 1         |
| Cox18        | 3.53863   | 4.00694                | 0.179312   | 0.381892  | 0.712127  |
| Rassf6_j4    | 0.259367  | 0.0712439              | -1.86416   | 0.0715986 | 0.321738  |
| Cdkl2_j2     | 11.8248   | 12.7629                | 0          | 1         | 1         |
| Cdkl2_j1     | 5.75839   | 5.50377                | 0          | 1         | 1         |
| G3bp2_j2     | 27.0999   | 20.4431                | 0          | 1         | 1         |
| Ppef2_j1     | 0.0601983 | 0.0528972              | -0.186533  | 0.863915  | 1         |
| Cxcl10_j1    | 2.49074   | 2.74878                | 0          | 1         | 1         |
| Nup54_j9     | 1.31794   | 1.30339                | -0.0160187 | 1         | 1         |
| Nup54_j10    | 3.00665   | 3.23946                | 0.107595   | 1         | 1         |
| Scarb2_j1    | 7.09266   | 6.63583                | 0          | 1         | 1         |
| Ccni         | 25.6811   | 28.4018                | 0          | 1         | 1         |
| Cnot6l_j1    | 0         | 0.0509352 1.79769e+308 |            | 0.0105602 | 1         |
| Paqr3_j1     | 0.550977  | 0.23046                | -1.25748   | 0.0681844 | 0.312593  |
| Rasgef1b_j1  | 0.193443  | 0 -1.79769e+308        |            | 1.55E-05  | 0.0004491 |
| Hnrnpd_j3    | 12.1663   | 12.8513                | 0.0790244  | 0.63497   | 0.858364  |
| Hnrnpd_j4    | 2.13441   | 1.83702                | -0.216467  | 0.452832  | 0.757789  |
| Hnrpd_j6     | 0.062754  | 0.23867                | 1.92724    | 0.0268189 | 0.172435  |
| Hnrpd_j7     | 2.33135   | 1.66484                | -0.485777  | 0.0150841 | 0.115367  |
| Sec31a_j3    | 9.39624   | 9.49136                | 0          | 1         | 1         |
| Lin54_j4     | 0.137014  | 0.109985               | 0          | 1         | 1         |
| Lin54_j5     | 0.0488382 | 0.0144966              | 0          | 1         | 1         |

|                  |            |           |               |           |           |
|------------------|------------|-----------|---------------|-----------|-----------|
| Coq2_j4          | 0.113543   | 0.11587   | 0             | 1         | 1         |
| Mapk10_j3        | 14.6013    | 15.6909   | 0             | 1         | 1         |
| Mapk10_j4        | 1.18708    | 0.69365   | 0             | 1         | 1         |
| Mapk10           | 0.960267   | 0         | 0             | 1         | 1         |
| Gbp9_j2          | 0.0109265  | 0.315139  | 4.85009       | 0.176979  | 0.516097  |
| Gbp4_j4          | 0.328818   | 0.339301  | 0.0452771     | 0.925012  | 0.976705  |
| Mpa2l_j1         | 1.0924     | 0.543812  | -1.00632      | 0.0110957 | 0.0925507 |
| Mpa2l_j2         | 0.558721   | 0.232924  | -1.26227      | 0.0611088 | 0.291681  |
| Mpa2l_j4         | 0.58436    | 0.165187  | -1.82276      | 0.0665317 | 0.308148  |
| Zfp644_j4        | 3.98371    | 3.69291   | 0             | 1         | 1         |
| Zfp644_j5        | 0.0884253  | 0.0667073 | 0             | 1         | 1         |
| Hfm1_j3          | 0.0595612  | 0.35016   | 2.55557       | 0.0364492 | 0.211118  |
| Hfm1_j15         | 0.0374765  | 0.0526094 | 0.489335      | 0.727531  | 1         |
| Hfm1_j14         | 0.0568432  | 0         | -1.79769e+308 | 0.033411  | 1         |
| Tgfr3_j2         | 0.203144   | 0.0937519 | 0             | 1         | 1         |
| Mfsd7a_j11       | 0.050442   | 0.0211649 | -1.25295      | 0.507283  | 1         |
| Gak_j4           | 0.923177   | 0.665447  | 0             | 1         | 1         |
| Dgkq_j2          | 0          | 0.795686  | 0             | 1         | 1         |
| Dgkq             | 7.59108    | 7.66109   | 0             | 1         | 1         |
| Crlf2_j7         | 0.308464   | 0.327972  | 0.0884681     | 0.872884  | 0.959782  |
| Crlf2_j11        | 1.4961     | 1.4064    | -0.0892013    | 0.809596  | 0.937682  |
| AK019690_j1      | 0.233681   | 0.188941  | -0.306608     | 0.685414  | 0.882628  |
| XLOC_025996      | 0.239429   | 0.168388  | -0.507812     | 0.361706  | 0.696116  |
| Gtpbp6_j9        | 1.09667    | 2.51355   | 0             | 1         | 1         |
| Gtpbp6_j10       | 0          | 0.112728  | 0             | 1         | 1         |
| Gtpbp6_j11       | 0.964699   | 1.35318   | 0             | 1         | 1         |
| Pxmp2            | 3.90606    | 3.83975   | 0             | 1         | 1         |
| Fbrsl1_j1        | 0.353037   | 0.247986  | -0.50956      | 0.353864  | 0.690069  |
| Ep400_j11        | 0.473459   | 0.38017   | -0.316596     | 0.41019   | 0.730238  |
| Ulk1_j2          | 1.28052    | 1.15875   | 0             | 1         | 1         |
| Miat_j3          | 1.38925    | 0.286433  | 0             | 1         | 1         |
| Miat_j2          | 0.339756   | 0.171004  | 0             | 1         | 1         |
| Miat_j1          | 0.082082   | 0.0766905 | 0             | 1         | 1         |
| Cryba4           | 0          | 0.165272  | 1.79769e+308  | 0.0227653 | 0.154095  |
| Cryba4_j1        | 0.111988   | 0.137386  | 0.29489       | 0.833457  | 1         |
| Asphd2_j4        | 2.8165     | 2.10849   | 0             | 1         | 1         |
| Sez6l            | 1.43096    | 2.08597   | 0             | 1         | 1         |
| Sez6l_j6         | 0.00502583 | 0.628654  | 0             | 1         | 1         |
| Crybb3_j1        | 0.127136   | 0.255168  | 1.00508       | 0.0929455 | 0.375022  |
| 2900026A02Rik_j2 | 2.18824    | 2.07395   | -0.0773913    | 0.632244  | 0.857011  |
| 2900026A02Rik_j1 | 0.962748   | 0.57286   | -0.748976     | 0.0006002 | 0.0094841 |
| Sart3_j1         | 1.96832    | 2.91641   | 0             | 1         | 1         |
| Tmem119          | 0.23003    | 1.17189   | 2.34894       | 2.25E-08  | 1.46E-06  |
| Selplg           | 0          | 0.0922957 | 1.79769e+308  | 0.0717349 | 1         |
| Svop_j4          | 9.44316    | 10.5343   | 0             | 1         | 1         |
| Alkbh2_j3        | 1.06261    | 1.46791   | 0.466143      | 0.268776  | 0.617733  |
| Mmab_j1          | 4.16751    | 4.53652   | 0             | 1         | 1         |



|               |             |           |            |           |           |
|---------------|-------------|-----------|------------|-----------|-----------|
| Git2_j1       | 1.23804     | 0.921489  | 0          | 1         | 1         |
| Unc119b_j1    | 1.28879     | 1.21969   | -0.0795117 | 0.760515  | 0.917558  |
| Rnf10_j3      | 13.2666     | 16.856    | 0          | 1         | 1         |
| Rnf10         | 55.019      | 54.2803   | 0          | 1         | 1         |
| Prkab1_j1     | 0.31664     | 0.684488  | 0          | 1         | 1         |
| Tmem233_j2    | 92.3631     | 90.6359   | 0          | 1         | 1         |
| Hspb8_j2      | 70.264      | 79.1202   | 0          | 1         | 1         |
| Srrm4_j3      | 0.0891179   | 0.0283558 | 0          | 1         | 1         |
| Rfc5_j1       | 0.383859    | 0.910235  | 0          | 1         | 1         |
| Rfc5_j2       | 0.338413    | 0.341925  | 0          | 1         | 1         |
| Rfc5          | 0.1844      | 0.353484  | 0          | 1         | 1         |
| Fbxw8_j3      | 10.3882     | 11.6502   | 0          | 1         | 1         |
| Rnft2         | 2.96708     | 1.72258   | 0          | 1         | 1         |
| Tpcn1_j1      | 0.210805    | 0.182549  | 0          | 1         | 1         |
| Tpcn1_j2      | 3.4716      | 2.3397    | 0          | 1         | 1         |
| 1110008J03Rik | 3.78042     | 3.69434   | -0.0332293 | 0.837479  | 0.94802   |
| Oas1c_j5      | 0.976541    | 1.06892   | 0          | 1         | 1         |
| Oas1c_j2      | 0.224056    | 0.0175356 | 0          | 1         | 1         |
| Rph3a_j8      | 0.361714    | 0.756913  | 0          | 1         | 1         |
| Rph3a_j10     | 0.566729    | 0.454263  | 0          | 1         | 1         |
| Ptpn11        | 5.08783     | 3.30578   | 0          | 1         | 1         |
| Trafd1_j6     | 0.230473    | 0.556711  | 1.27233    | 0.0106719 | 0.0897998 |
| Trafd1        | 0.574263    | 0.544602  | -0.0765099 | 0.789862  | 0.929963  |
| Mapkapk5_j8   | 0.648631    | 0.394941  | 0          | 1         | 1         |
| Sh2b3         | 0.400249    | 0.209464  | 0          | 1         | 1         |
| Cux2_j6       | 0.31568     | 0.0509636 | -2.63092   | 0.0058802 | 0.0575951 |
| Cux2_j1       | 0.000550013 | 0.0731717 | 7.05568    | 0.166115  | 1         |
| Tctn1_j3      | 1.29267     | 1.13597   | 0          | 1         | 1         |
| Tect1         | 1.30492     | 1.26651   | 0          | 1         | 1         |
| Atp2a2_j1     | 3.02523     | 3.71688   | 0          | 1         | 1         |
| Camkk2_j2     | 0.963394    | 1.58081   | 0          | 1         | 1         |
| Anapc5_j3     | 32.643      | 39.9873   | 0          | 1         | 1         |
| Anapc5        | 16.612      | 15.8697   | 0          | 1         | 1         |
| Anapc5        | 19.7944     | 22.6621   | 0          | 1         | 1         |
| Kdm2b_j10     | 0.0730952   | 0.0317772 | -1.20179   | 0.270797  | 1         |
| Rhof          | 1.00473     | 1.06606   | 0.0854766  | 0.699274  | 0.889232  |
| AI480526_j2   | 0.0888153   | 0.0651287 | -0.447516  | 0.644048  | 1         |
| AI480526_j3   | 1.5738      | 1.49894   | -0.0703069 | 0.743022  | 0.910059  |
| AI480526_j2   | 0.92515     | 1.04438   | 0.174885   | 0.565912  | 0.824157  |
| Vps33a_j2     | 0.167578    | 0.229779  | 0          | 1         | 1         |
| Clip1_j1      | 1.04185     | 0.966474  | 0          | 1         | 1         |
| Clip1_j2      | 0.432212    | 0.233732  | 0          | 1         | 1         |
| Zcchc8_j2     | 0           | 0.232984  | 0          | 1         | 1         |
| Rsrc2_j1      | 2.88705     | 2.36544   | 0          | 1         | 1         |
| Abcb9_j2      | 0.226159    | 0.0812489 | 0          | 1         | 1         |
| Pitpnm2_j10   | 19.2678     | 19.184    | 0          | 1         | 1         |
| Pitpnm2_j1    | 11.2151     | 7.19097   | 0          | 1         | 1         |

|                  |           |           |           |           |           |
|------------------|-----------|-----------|-----------|-----------|-----------|
| Pitpnm2_j2       | 10.2555   | 7.8895    | 0         | 1         | 1         |
| Mphosph9_j4      | 0.219577  | 0.0237988 | 0         | 1         | 1         |
| Mphosph9_j8      | 0.0508211 | 0.141977  | 0         | 1         | 1         |
| Ccdc92_j1        | 22.5124   | 22.9939   | 0         | 1         | 1         |
| Ccdc92_j2        | 1.77584   | 1.91522   | 0         | 1         | 1         |
| Ccdc92_j3        | 22.2627   | 22.635    | 0         | 1         | 1         |
| XLOC_026125      | 0.0949455 | 0.229732  | 1.27478   | 0.0857018 | 0.357424  |
| Dhx37_j3         | 0.256727  | 0.159177  | -0.689598 | 0.527197  | 0.801453  |
| Slc15a4_j1       | 0.281508  | 0.665318  | 0         | 1         | 1         |
| 5930412G12Rik_j4 | 0.265391  | 0.410071  | 0.627752  | 0.20118   | 0.544548  |
| Rimbp2_j12       | 0.764873  | 0.246923  | 0         | 1         | 1         |
| Rimbp2_j9        | 0.357839  | 0.137692  | 0         | 1         | 1         |
| Chchd2_j4        | 33.1709   | 39.8818   | 0.265814  | 0.018463  | 0.133443  |
| Chchd2_j6        | 0.289325  | 0.277499  | -0.060208 | 0.965044  | 0.990054  |
| Asl_j2           | 8.77724   | 10.8909   | 0         | 1         | 1         |
| Wbscr17_j3       | 0.264021  | 0         | 0         | 1         | 1         |
| Wbscr17          | 8.50928   | 6.83522   | 0         | 1         | 1         |
| XLOC_026147      | 0.11914   | 0.0973731 | -0.291067 | 0.798099  | 1         |
| Auts2_j7         | 0.159802  | 0.363445  | 0         | 1         | 1         |
| Auts2_j17        | 0.237998  | 0.242157  | 0         | 1         | 1         |
| Ncf1_j2          | 0.606658  | 0.793446  | 0.387248  | 0.256256  | 0.605113  |
| Gtf2i_j7         | 1.34347   | 1.57912   | 0         | 1         | 1         |
| Gtf2ird1_j1      | 1.43723   | 1.99113   | 0         | 1         | 1         |
| Gtf2ird1_j3      | 0.414196  | 0.331375  | 0         | 1         | 1         |
| Gtf2ird1_j2      | 0.64026   | 0.477946  | 0         | 1         | 1         |
| Clip2            | 0.922585  | 0.351123  | 0         | 1         | 1         |
| Clip2_j6         | 0.833234  | 0.575567  | 0         | 1         | 1         |
| Eif4h            | 13.1303   | 13.6318   | 0         | 1         | 1         |
| Limk1_j2         | 33.5096   | 27.8407   | -0.267378 | 0.0177164 | 0.129412  |
| XLOC_026158      | 0.218364  | 0.228131  | 0.0631281 | 0.934422  | 0.979958  |
| Eln_j2           | 0.285957  | 0.0822458 | -1.79778  | 0.0181564 | 0.131804  |
| Eln              | 0.576766  | 0.986817  | 0.774796  | 0.0017545 | 0.0225051 |
| Wbscr22          | 3.98404   | 3.99379   | 0.003528  | 0.975905  | 0.993085  |
| Hip1_j3          | 2.07405   | 2.34215   | 0         | 1         | 1         |
| Hip1_j4          | 4.45614   | 2.95427   | 0         | 1         | 1         |
| Hip1_j5          | 0.591679  | 0.579742  | 0         | 1         | 1         |
| Hip1             | 1.60489   | 1.98812   | 0         | 1         | 1         |
| Ywhag_j1         | 36.0703   | 0.272513  | 0         | 1         | 1         |
| Srcrb4d_j1       | 1.46484   | 0.931396  | -0.653277 | 0.0650094 | 0.30355   |
| Lrwd1            | 2.23113   | 2.41823   | 0.116172  | 0.376722  | 0.708706  |
| Orai2_j4         | 0.0467616 | 0.233179  | 2.31804   | 0.316721  | 0.660102  |
| Sh2b2_j1         | 0.0991033 | 0.0306917 | -1.69108  | 0.352391  | 1         |
| Znhit1           | 7.88879   | 10.4811   | 0         | 1         | 1         |
| Ap1s1_j1         | 31.715    | 43.3469   | 0         | 1         | 1         |
| Serpine1_j2      | 0.0322867 | 0.216286  | 2.74393   | 0.0253128 | 0.165753  |
| Trim56           | 0.0723335 | 0.173562  | 1.26271   | 0.138582  | 0.462974  |
| Srrt_j1          | 1.31316   | 1.18539   | 0         | 1         | 1         |

|                  |             |            |               |           |          |
|------------------|-------------|------------|---------------|-----------|----------|
| Gnb2_j6          | 71.7143     | 84.4847    | 0.236429      | 0.0058189 | 0.057111 |
| Mospd3_j1        | 0.000637921 | 1.05609    | 10.6931       | 0.751806  | 0.914176 |
| Fbxo24_j1        | 0.0704074   | 0.122633   | 0.800544      | 0.41312   | 1        |
| 6430598A04Rik_j1 | 5.49263     | 4.25732    | 0             | 1         | 1        |
| 6430598A04Rik_j3 | 4.46362     | 6.95575    | 0             | 1         | 1        |
| Cyp3a13_j7       | 0.0547061   | 0.00178593 | -4.93696      | 0.685204  | 1        |
| Gjc3_j2          | 2.51995     | 4.13502    | 0             | 1         | 1        |
| Zfp113_j2        | 7.57E-05    | 0.205292   | 11.4057       | 0.842737  | 0.950279 |
| Mcm7_j2          | 0.35147     | 0.373439   | 0.0874731     | 0.845462  | 0.951174 |
| Gpc2_j2          | 0.0412502   | 0.186578   | 2.17731       | 0.049964  | 0.258241 |
| Pdgfa_j3         | 0           | 0.703247   | 0             | 1         | 1        |
| Pdgfa_j6         | 1.54885     | 1.17225    | 0             | 1         | 1        |
| Cox19_j2         | 4.93121     | 5.07829    | 0.0424028     | 0.896716  | 0.967071 |
| Micall2          | 3.16533     | 3.2335     | 0.0307432     | 0.838248  | 0.948409 |
| Ints1_j6         | 0.0626673   | 0.0254823  | 0             | 1         | 1        |
| Ints1_j5         | 0.194391    | 0.19921    | 0             | 1         | 1        |
| Psmg3            | 1.01976     | 1.62356    | 0.670932      | 0.129767  | 0.448694 |
| Mad1l1_j4        | 5.32318     | 4.91295    | 0             | 1         | 1        |
| Mad1l1           | 6.15537     | 5.65817    | 0             | 1         | 1        |
| Mad1l1_j3        | 0.876821    | 1.31178    | 0             | 1         | 1        |
| Snx8_j2          | 0.971271    | 0.637284   | 0             | 1         | 1        |
| Grifin_j1        | 0.113401    | 0.0738687  | -0.618397     | 0.419533  | 1        |
| Ttyh3_j3         | 0.826711    | 1.21758    | 0             | 1         | 1        |
| Gna12_j1         | 9.57052     | 9.69868    | 0             | 1         | 1        |
| Card11_j9        | 0.180876    | 0.125202   | -0.530743     | 0.338512  | 0.678819 |
| Mmd2             | 40.8086     | 35.9931    | -0.181156     | 0.0515599 | 0.263333 |
| Tnrc18_j6        | 1.00731     | 1.05648    | 0             | 1         | 1        |
| Fbxl18_j1        | 1.65443     | 1.84715    | 0             | 1         | 1        |
| Rnf216_j6        | 0.151352    | 0.130571   | 0             | 1         | 1        |
| Rbak_j5          | 0.1294      | 0.0802359  | -0.689512     | 0.423784  | 1        |
| Zdhhc4_j4        | 5.95389     | 8.8905     | 0             | 1         | 1        |
| Rac1_j3          | 0.81488     | 0.53296    | 0             | 1         | 1        |
| Usp42_j1         | 1.36713     | 1.54372    | 0             | 1         | 1        |
| Tecpr1_j1        | 0.0291417   | 0.0719945  | 0             | 1         | 1        |
| Tecpr1           | 3.20393     | 2.5436     | 0             | 1         | 1        |
| XLOC_026251      | 3.796       | 5.15039    | 0.4402        | 0.254609  | 0.602805 |
| Smurf1_j2        | 2.71243     | 3.05701    | 0             | 1         | 1        |
| Pdap1_j1         | 4.54477     | 6.70034    | 0             | 1         | 1        |
| Atp5j2_j2        | 28.9473     | 32.8971    | 0.184533      | 0.293692  | 0.640505 |
| Zkscan14_j2      | 1.44063     | 1.60843    | 0.15896       | 0.536758  | 0.80709  |
| Rnf6_j2          | 2.7315      | 2.53612    | 0             | 1         | 1        |
| Usp12_j2         | 0           | 0.0629665  | 0             | 1         | 1        |
| XLOC_026263      | 0           | 0.0755997  | 1.79769e+308  | 0.0621641 | 1        |
| XLOC_026263      | 0           | 0.056426   | 1.79769e+308  | 0.104387  | 1        |
| LnX2_j1          | 0.646165    | 0.461638   | 0             | 1         | 1        |
| Flt1_j1          | 1.33334     | 1.22314    | -0.124454     | 0.505767  | 0.788505 |
| Flt1_j2          | 0.122958    | 0          | -1.79769e+308 | 1.31E-06  | 1        |

|                  |           |                 |           |           |           |
|------------------|-----------|-----------------|-----------|-----------|-----------|
| Slc46a3          | 0.423308  | 0.45704         | 0         | 1         | 1         |
| Slc7a1_j2        | 0.248294  | 0.16532         | 0         | 1         | 1         |
| Ubl3_j4          | 18.0307   | 19.2086         | 0         | 1         | 1         |
| Katnal1_j3       | 0.422108  | 0.51865         | 0         | 1         | 1         |
| Katnal1_j2       | 3.76738   | 1.67738         | 0         | 1         | 1         |
| N4bp2l2_j6       | 0.084374  | 0.0652075       | -0.371762 | 0.742243  | 1         |
| Krit1_j2         | 0.139841  | 0.387627        | 0         | 1         | 1         |
| Slc25a40_j4      | 1.01136   | 0.516245        | -0.970176 | 0.272899  | 0.621813  |
| Slc25a40_j5      | 0.718223  | 0.00305816      | -7.87562  | 0.151567  | 0.4829    |
| Abcb1a_j1        | 3.19326   | 3.1711          | 0         | 1         | 1         |
| 9330182L06Rik_j3 | 5.82306   | 5.53848         | 0         | 1         | 1         |
| Pclo_j2          | 0.130648  | 0.0504439       | 0         | 1         | 1         |
| Cacna2d1_j4      | 7.45822   | 11.4937         | 0         | 1         | 1         |
| Cacna2d1_j5      | 26.7866   | 50.094          | 0         | 1         | 1         |
| Magi2_j1         | 0.113767  | 0.106264        | -0.09842  | 0.941959  | 1         |
| Magi2_j2         | 0.362754  | 0.2298          | -0.65861  | 0.107441  | 0.407525  |
| Fam185a_j2       | 2.5317    | 2.46402         | -0.039097 | 0.87647   | 0.960747  |
| Armc10           | 0.123143  | 0.0737292       | -0.740022 | 0.280725  | 1         |
| Armc10           | 0.116542  | 0.0265727       | -2.13283  | 0.0687109 | 1         |
| Lhfpl3_j3        | 0.405536  | 0.00823154      | 0         | 1         | 1         |
| Lhfpl3_j2        | 6.43206   | 1.35641         | 0         | 1         | 1         |
| AK002390         | 0.440397  | 0.658431        | 0.580226  | 0.136984  | 0.460194  |
| Klhl7_j1         | 0.335706  | 0.217889        | -0.6236   | 0.434317  | 0.74545   |
| Accn3_j2         | 3.19407   | 1.99662         | -0.677835 | 0.0063845 | 0.0614477 |
| Slc4a2_j1        | 2.98661   | 2.61638         | 0         | 1         | 1         |
| Agap3_j6         | 8.68995   | 3.89469         | 0         | 1         | 1         |
| Agap3_j8         | 9.8283    | 12.142          | 0         | 1         | 1         |
| Nub1             | 5.71924   | 5.53547         | 0         | 1         | 1         |
| Nub1_j3          | 7.45865   | 9.31878         | 0         | 1         | 1         |
| XLOC_025135      | 0.11458   | 0.132237        | 0         | 1         | 1         |
| Actr3b_j1        | 1.5853    | 0.904871        | 0         | 1         | 1         |
| Actr3b_j4        | 9.60523   | 7.955           | 0         | 1         | 1         |
| Dpp6_j1          | 0.129634  | 0.0708075       | -0.872465 | 0.527799  | 1         |
| Dpp6             | 27.5669   | 12.5911         | 0         | 1         | 1         |
| Htr5a_j3         | 0.0905567 | 0 -1.79769e+308 | 0.0006815 | 0.0006815 | 1         |
| Htr5a_j5         | 0.162915  | 0.271125        | 0.734837  | 0.158352  | 0.492583  |
| Rbm33_j3         | 0.0470123 | 0               | 0         | 1         | 1         |
| Rbm33_j7         | 1.68891   | 0.974697        | 0         | 1         | 1         |
| Rnf32_j3         | 0.507942  | 0.426587        | -0.251825 | 0.564521  | 0.823408  |
| Ube3c_j2         | 0         | 0.115918        | 0         | 1         | 1         |
| Ube3c_j1         | 2.55626   | 3.09969         | 0         | 1         | 1         |
| Ube3c_j4         | 6.32827   | 10.8059         | 0         | 1         | 1         |
| Gm1060_j2        | 0.213118  | 0.215354        | 0.0150578 | 0.980718  | 0.994152  |
| Cenp-a_j1        | 0.194384  | 0.253599        | 0.383644  | 0.650234  | 0.865694  |
| Emilin1          | 0.40752   | 0.411085        | 0.012566  | 0.968476  | 0.991077  |
| Emilin1_j4       | 0.241345  | 0.493369        | 1.03157   | 0.157182  | 0.490998  |
| Cad_j1           | 1.20327   | 0.892154        | 0         | 1         | 1         |

|                  |           |             |               |           |          |
|------------------|-----------|-------------|---------------|-----------|----------|
| Snx17_j3         | 4.16092   | 3.88407     | 0             | 1         | 1        |
| Nrbp1_j7         | 14.2945   | 14.6175     | 0             | 1         | 1        |
| Nrbp1_j9         | 15.8934   | 16.4568     | 0             | 1         | 1        |
| Zfp512_j1        | 0.216478  | 0.29669     | 0             | 1         | 1        |
| XLOC_025181      | 0.265157  | 0.217505    | -0.285799     | 0.481784  | 0.775249 |
| Ywhah_j1         | 0.386309  | 0.19509     | 0             | 1         | 1        |
| Ywhah_j2         | 7.17188   | 5.53353     | 0             | 1         | 1        |
| 4933407H18Rik_j1 | 0.274936  | 0.195428    | -0.49246      | 0.16012   | 0.49462  |
| 4933407H18Rik    | 0         | 0.0553583   | 1.79769e+308  | 0.0044689 | 1        |
| Whsc1_j2         | 3.63955   | 3.38639     | 0             | 1         | 1        |
| Whsc1_j8         | 0.503186  | 0.215345    | 0             | 1         | 1        |
| Gm1673           | 5.01066   | 5.35198     | 0.0950709     | 0.672056  | 0.87616  |
| Nat8l_j4         | 11.9736   | 1.29147     | 0             | 1         | 1        |
| XLOC_025191      | 0.248194  | 0.169743    | 0             | 1         | 1        |
| Fam193a_j1       | 3.73086   | 3.58221     | -0.0586588    | 0.671403  | 0.875764 |
| Sh3bp2           | 0.293552  | 0           | -1.79769e+308 | 5.85E-08  | 3.39E-06 |
| Add1_j6          | 16.2117   | 17.6186     | 0             | 1         | 1        |
| Grk4_j4          | 0.174085  | 0.0933539   | -0.899009     | 0.284263  | 0.632886 |
| XLOC_025197      | 0.0950483 | 0.104323    | 0.134325      | 0.886857  | 1        |
| Rgs12_j1         | 0.941942  | 1.10305     | 0             | 1         | 1        |
| Rgs12_j2         | 0.664685  | 0.603479    | 0             | 1         | 1        |
| XLOC_025200      | 0.0614775 | 0           | -1.79769e+308 | 0.0382519 | 1        |
| XLOC_025201      | 0.171654  | 0.0588157   | -1.54523      | 0.215521  | 0.561474 |
| Hmx1_j2          | 1.43788   | 1.80306     | 0.326507      | 0.361771  | 0.696128 |
| Acox3_j1         | 0.555076  | 0.739135    | 0             | 1         | 1        |
| Acox3            | 1.98202   | 1.19131     | 0             | 1         | 1        |
| Ablim2_j1        | 1.13896   | 0.968252    | 0             | 1         | 1        |
| Afap1_j1         | 0.39175   | 0.896015    | 0             | 1         | 1        |
| Ppp2r2c_j1       | 0.185149  | 0.0865284   | -1.09744      | 0.194789  | 0.537206 |
| Jakmip1          | 1.17666   | 0.937951    | -0.327111     | 0.314296  | 0.658565 |
| Evc2_j4          | 0.181522  | 0.168974    | -0.103344     | 0.885468  | 0.963679 |
| XLOC_025234      | 0.448132  | 0.288503    | -0.635339     | 0.511052  | 0.791357 |
| XLOC_025236      | 0.0625339 | 0.0463939   | -0.430703     | 0.598338  | 1        |
| Slit2_j6         | 1.10139   | 0.465832    | 0             | 1         | 1        |
| Slit2_j8         | 0.254709  | 0.000164696 | 0             | 1         | 1        |
| AK017706_j1      | 0.334453  | 0.238855    | 0             | 1         | 1        |
| 9230114K14Rik_j1 | 0.152069  | 0.0991515   | -0.617019     | 0.18995   | 0.531833 |
| Pi4k2b_j1        | 0.259736  | 0.0527456   | -2.29992      | 0.0275446 | 0.175637 |
| Pi4k2b_j2        | 0.740518  | 0.659238    | -0.167736     | 0.668212  | 0.874424 |
| XLOC_025248      | 0.0912702 | 0.0512101   | -0.833715     | 0.464644  | 1        |
| Anapc4_j2        | 0.54635   | 0           | -1.79769e+308 | 6.20E-08  | 3.56E-06 |
| Slc34a2_j1       | 0.159377  | 0           | -1.79769e+308 | 1.70E-06  | 6.55E-05 |
| XLOC_025250      | 0.389892  | 1.39044     | 0             | 1         | 1        |
| XLOC_025255      | 0.122567  | 0.0815747   | -0.587372     | 0.671179  | 1        |
| Pcdh7_j1         | 3.77686   | 1.92268     | 0             | 1         | 1        |
| Pcdh7_j5         | 9.63376   | 5.7173      | 0             | 1         | 1        |
| 3110047P20Rik_j1 | 3.8262    | 3.53011     | 0             | 1         | 1        |

|                  |           |           |               |           |           |
|------------------|-----------|-----------|---------------|-----------|-----------|
| Pgm1_j1          | 0.430904  | 0.601495  | 0.481186      | 0.222352  | 0.569453  |
| Pgm1_j2          | 0.174772  | 0         | -1.79769e+308 | 0.0008019 | 0.0120047 |
| Tbc1d1_j2        | 1.28967   | 1.39137   | 0             | 1         | 1         |
| Klhl5_j4         | 2.96061   | 1.12012   | 0             | 1         | 1         |
| Klhl5_j5         | 0.0873418 | 0.06858   | 0             | 1         | 1         |
| Wdr19_j1         | 0.404461  | 0.247331  | -0.709556     | 0.129565  | 0.448468  |
| Wdr19_j3         | 0.111407  | 0.0320952 | -1.79541      | 0.108116  | 1         |
| Ube2k_j2         | 16.1316   | 21.0416   | 0             | 1         | 1         |
| Nsun7_j1         | 0.155746  | 0.074678  | -1.06044      | 0.223529  | 0.570667  |
| Nsun7_j5         | 0.160703  | 0.16812   | 0.0650943     | 0.920304  | 0.975019  |
| Nsun7_j6         | 0.114261  | 0         | -1.79769e+308 | 0.0020247 | 1         |
| Uchl1            | 1.76151   | 1.56828   | 0             | 1         | 1         |
| Limch1_j4        | 1.43763   | 1.67697   | 0             | 1         | 1         |
| Tmem33_j3        | 0.333553  | 0.446745  | 0.421534      | 0.229138  | 0.57622   |
| Slc30a9_j2       | 0.69379   | 0         | 0             | 1         | 1         |
| Slc30a9_j4       | 0.152571  | 0.16891   | 0             | 1         | 1         |
| XLOC_025284      | 0.235893  | 0.0382    | -2.62649      | 0.194834  | 0.537206  |
| XLOC_025285      | 0.210864  | 0.10478   | -1.00894      | 0.314353  | 0.658565  |
| Atp10d_j12       | 0.199112  | 0.0846953 | -1.23322      | 0.235427  | 0.582638  |
| XLOC_025294      | 0.117008  | 0.0565979 | -1.04779      | 0.401586  | 1         |
| XLOC_025296      | 0.122224  | 0.0504694 | -1.27605      | 0.239584  | 1         |
| Dcun1d4_j3       | 1.65723   | 2.10226   | 0             | 1         | 1         |
| Pdgfra_j1        | 0.159546  | 0.139613  | 0             | 1         | 1         |
| Pdgfra           | 0.219352  | 0.187861  | 0             | 1         | 1         |
| Pdgfra_j4        | 0.245332  | 0.521449  | 0             | 1         | 1         |
| XLOC_025306      | 0.118793  | 0.141726  | 0.254661      | 0.749135  | 1         |
| XLOC_025307      | 0.12141   | 0.0964476 | -0.332076     | 0.779273  | 1         |
| Srd5a3_j1        | 0.189752  | 0         | -1.79769e+308 | 0.0537451 | 0.270102  |
| XLOC_025308      | 0.290059  | 0.229696  | -0.336619     | 0.33623   | 0.676695  |
| Exoc1_j2         | 5.24381   | 4.32928   | 0             | 1         | 1         |
| Cep135_j3        | 0.0981214 | 0.177265  | 0.853267      | 0.15757   | 0.491628  |
| C530008M17Rik_j2 | 0.928419  | 0.465753  | 0             | 1         | 1         |
| C530008M17Rik_j3 | 0         | 0.0850538 | 0             | 1         | 1         |
| C530008M17Rik_j6 | 0.361415  | 0.0917214 | 0             | 1         | 1         |
| Paics_j1         | 1.90425   | 1.81663   | 0             | 1         | 1         |
| Rest_j1          | 0.0551961 | 0         | -1.79769e+308 | 0.0033639 | 1         |
| Lphn3_j9         | 0.842075  | 0.733742  | -0.198675     | 0.359988  | 0.695038  |
| Rufy3            | 19.788    | 18.0709   | 0             | 1         | 1         |
| Slc4a4_j1        | 0.1163    | 0.102524  | 0             | 1         | 1         |
| XLOC_025332      | 1.01594   | 0.85166   | -0.254471     | 0.46711   | 0.766568  |
| Ppbp             | 0.258813  | 0.694851  | 1.42479       | 0.0021585 | 0.0264878 |
| Sept11_j3        | 0.668651  | 0.607565  | 0             | 1         | 1         |
| Fras1_j4         | 0.106048  | 0.0259694 | -2.02983      | 0.0299685 | 1         |
| Anxa3_j1         | 0.482018  | 0.0176827 | -4.76867      | 0.0383762 | 0.217927  |
| Anxa3_j4         | 0.447432  | 0.382927  | -0.224597     | 0.750294  | 0.913315  |
| 1700007G11Rik_j1 | 0.183394  | 0.0235392 | -2.96181      | 0.220793  | 0.567669  |
| Bmp3_j1          | 0.0716649 | 0.0202579 | -1.82278      | 0.264287  | 1         |

|                  |           |                 |            |           |           |
|------------------|-----------|-----------------|------------|-----------|-----------|
| 2310034O05Rik_j1 | 0.0874946 | 0.0710314       | -0.300738  | 0.762588  | 1         |
| Mrps18c_j1       | 2.64427   | 3.27292         | 0          | 1         | 1         |
| Arhgap24         | 1.89243   | 1.45533         | 0          | 1         | 1         |
| Arhgap24         | 1.05524   | 1.37095         | 0          | 1         | 1         |
| Arhgap24_j4      | 0.0794033 | 0.066223        | 0          | 1         | 1         |
| Ptpn13_j4        | 0.0463259 | 0.371629        | 3.00397    | 2.20E-08  | 1.42E-06  |
| Ptpn13_j12       | 1.1543    | 1.31065         | 0.183264   | 0.507921  | 0.789986  |
| Aff1_j2          | 0.458154  | 0.819315        | 0          | 1         | 1         |
| Spp1_j2          | 0.232933  | 0.135867        | 0          | 1         | 1         |
| D930016D06Rik_j1 | 0.302227  | 0.252839        | 0          | 1         | 1         |
| D930016D06Rik_j4 | 0.359468  | 0.407176        | 0          | 1         | 1         |
| D930016D06Rik    | 0.808939  | 0.61879         | 0          | 1         | 1         |
| D930016D06Rik_j6 | 0.136152  | 0               | 0          | 1         | 1         |
| Gm8258           | 1.79046   | 1.90971         | 0.0930271  | 0.757894  | 0.916639  |
| Lrrc8c_j2        | 2.53551   | 5.18994         | 0          | 1         | 1         |
| Lrrc8d           | 10.9817   | 7.7729          | 0          | 1         | 1         |
| Zfp326_j1        | 2.70314   | 2.02797         | 0          | 1         | 1         |
| Cdc7_j5          | 1.08763   | 1.14865         | 0.0787475  | 0.816717  | 0.940335  |
| Brdt_j1          | 0.160889  | 0.215819        | 0.423757   | 0.449287  | 0.755468  |
| A830010M20Rik_j2 | 0.84245   | 0.560536        | -0.587784  | 0.0616855 | 0.293593  |
| Rpap2_j2         | 5.20036   | 5.76885         | 0.149673   | 0.25789   | 0.606586  |
| Rpl5_j6          | 0.306419  | 0.465369        | 0          | 1         | 1         |
| Mtf2_j2          | 0.150705  | 0               | 0          | 1         | 1         |
| AK141638_j9      | 3.53363   | 3.95555         | 0          | 1         | 1         |
| Pde6b_j2         | 0.145036  | 0 -1.79769e+308 | 0.0196154  | 0.139072  |           |
| Idua_j3          | 0.474663  | 0.275812        | 0          | 1         | 1         |
| XLOC_025402      | 0.306696  | 0.0594775       | -2.36639   | 0.0001872 | 0.0036316 |
| Zfp605_j2        | 0.281667  | 0.165123        | 0          | 1         | 1         |
| Zfp605           | 0.083089  | 0.169835        | 0          | 1         | 1         |
| Golga3_j1        | 0.312754  | 0.216446        | 0          | 1         | 1         |
| Pole_j1          | 0.383685  | 0.236688        | -0.696932  | 0.02768   | 0.176224  |
| Chek2_j4         | 0.0797339 | 0.000887917     | -6.48862   | 0.629217  | 1         |
| Chek2_j8         | 0.0792626 | 0 -1.79769e+308 | 0.0093894  | 1         |           |
| Chek2_j12        | 0.0508918 | 0.203811        | 2.00173    | 0.166762  | 0.503133  |
| Pitpnb_j2        | 0.185828  | 0 -1.79769e+308 | 0.0133857  | 0.106164  |           |
| Usp30_j4         | 1.01674   | 0.726403        | 0          | 1         | 1         |
| Usp30_j5         | 0.642606  | 0               | 0          | 1         | 1         |
| Ube3b            | 23.894    | 22.2876         | 0          | 1         | 1         |
| BC057022_j1      | 1.77685   | 2.26626         | 0.35099    | 0.113735  | 0.419374  |
| XLOC_025434      | 0.0992501 | 0.0764914       | -0.375771  | 0.670704  | 1         |
| Sppl3            | 2.70619   | 2.56592         | -0.0767871 | 0.716673  | 0.897711  |
| Sppl3_j6         | 1.48933   | 1.59609         | 0.0998743  | 0.795988  | 0.932016  |
| Rplp0            | 10.0644   | 4.61881         | 0          | 1         | 1         |
| Rplp0_j5         | 29.0913   | 35.2129         | 0          | 1         | 1         |
| Rab35_j3         | 0.959323  | 0 -1.79769e+308 | 0.0003563  | 0.0061386 |           |
| Cit_j3           | 0.0487935 | 0 -1.79769e+308 | 0.0003194  | 1         |           |
| Cit_j12          | 0.143685  | 0.01936         | -2.89176   | 0.0066859 | 0.0635533 |

|             |           |                 |            |           |           |
|-------------|-----------|-----------------|------------|-----------|-----------|
| XLOC_025450 | 0.187608  | 0.117319        | -0.677282  | 0.244911  | 0.592357  |
| Taok3       | 0.793445  | 0.907842        | 0          | 1         | 1         |
| Taok3_j3    | 4.63675   | 4.69847         | 0          | 1         | 1         |
| Vsig10_j3   | 0.158831  | 0 -1.79769e+308 |            | 2.52E-05  | 0.0006672 |
| Wsb2_j1     | 0.700957  | 0.882673        | 0          | 1         | 1         |
| Wsb2_j4     | 9.09676   | 17.0969         | 0          | 1         | 1         |
| Nos1_j1     | 0.218164  | 0.172921        | -0.335299  | 0.462142  | 0.763147  |
| Fbxo21_j5   | 7.68799   | 7.97525         | 0          | 1         | 1         |
| Tesc_j2     | 1.1396    | 0.452623        | 0          | 1         | 1         |
| Tesc_j4     | 11.6797   | 9.20075         | 0          | 1         | 1         |
| Oas1b_j2    | 0.231819  | 0.362956        | 0          | 1         | 1         |
| Gm15800_j6  | 0.219315  | 0.10162         | -1.10982   | 0.0061217 | 0.0595298 |
| Atxn2_j7    | 0.178276  | 0.0968853       | 0          | 1         | 1         |
| Atxn2_j10   | 0.032727  | 0.0555642       | 0          | 1         | 1         |
| Fam109a_j3  | 0.678035  | 0.543971        | 0          | 1         | 1         |
| Fam109a_j4  | 1.82012   | 1.86189         | 0          | 1         | 1         |
| Myl2_j1     | 0.395998  | 0.102645        | -1.94782   | 0.190384  | 0.532443  |
| Hvcn1_j1    | 1.30544   | 1.7001          | 0.381084   | 0.177364  | 0.516664  |
| Pptc7_j2    | 8.25294   | 5.82642         | -0.502299  | 6.92E-05  | 0.0015708 |
| Gpn3        | 8.7023    | 8.36664         | -0.0567482 | 0.652669  | 0.867087  |
| P2rx7_j3    | 0.948085  | 0.582978        | 0          | 1         | 1         |
| AK079939    | 0.600722  | 0.53714         | -0.161399  | 0.673618  | 0.877015  |
| Setd1b_j1   | 0.193765  | 0.319436        | 0          | 1         | 1         |
| Bcl7a_j2    | 4.73115   | 4.75102         | 0.006047   | 0.964787  | 0.990042  |
| Kntc1_j2    | 0.0793069 | 0 -1.79769e+308 |            | 0.0008066 | 1         |
| Kntc1_j1    | 0.0892162 | 0.109073        | 0.289918   | 1         | 1         |
| Kntc1_j4    | 1.0882    | 0.960701        | -0.17979   | 0.74525   | 0.911274  |
| Ccdc62_j2   | 0.0696374 | 0.0375914       | -0.889458  | 0.632374  | 1         |
| Ccdc62_j4   | 0.0695457 | 0.103672        | 0.575991   | 0.647906  | 1         |
| Ccdc62_j3   | 0.109729  | 0.00440313      | -4.63927   | 0.368754  | 1         |
| Hip1r_j1    | 0.45275   | 0.30522         | -0.568867  | 0.0328522 | 0.197417  |
| Tctn2_j3    | 0.126258  | 0 -1.79769e+308 |            | 0.0037277 | 1         |
| Atp6v0a2_j1 | 3.24669   | 3.98851         | 0.296878   | 0.0804927 | 0.345164  |
| Dnahc10_j6  | 0.163649  | 0.102079        | -0.680913  | 0.418188  | 0.735053  |
| Dnahc10_j8  | 0.0622937 | 0.0654259       | 0.0707766  | 0.969276  | 1         |
| Zfp664_j1   | 28.0924   | 31.2515         | 0          | 1         | 1         |
| Aacs_j1     | 0.0652448 | 0               | 0          | 1         | 1         |
| XLOC_025526 | 0.182618  | 0.273381        | 0.58208    | 0.291893  | 0.638801  |
| XLOC_025526 | 0.347661  | 0.603009        | 0.794496   | 9.19E-05  | 0.0019973 |
| Glt1d1_j2   | 0.402038  | 0.239003        | 0          | 1         | 1         |
| Ran_j2      | 3.6645    | 3.34078         | 0          | 1         | 1         |
| XLOC_025532 | 0.128369  | 0.0904241       | 0          | 1         | 1         |
| Srsf8_j5    | 1.65748   | 1.64903         | 0          | 1         | 1         |
| Srsf8_j4    | 2.64961   | 2.44608         | 0          | 1         | 1         |
| Cct6a_j7    | 2.9559    | 4.6549          | 0.655154   | 0.0005342 | 0.0086228 |
| Cct6a_j6    | 0.230162  | 0.432916        | 0.911437   | 0.100099  | 0.391665  |
| Cct6a_j5    | 0.27429   | 0.423471        | 0.626558   | 0.0738349 | 0.327499  |



|                  |           |                       |            |           |          |
|------------------|-----------|-----------------------|------------|-----------|----------|
| Vkorc1l1_j1      | 12.9079   | 9.99503               | 0          | 1         | 1        |
| Rabgef1_j3       | 4.33253   | 5.38547               | 0          | 1         | 1        |
| Caln1_j3         | 0.159279  | 0                     | 0          | 1         | 1        |
| Gtf2ird2_j5      | 2.09736   | 2.03692               | 0          | 1         | 1        |
| Mlxipl_j1        | 0.0732361 | 0 -1.79769e+308       | 0.0707987  |           | 1        |
| Por_j1           | 0.0807133 | 0                     | 0          | 1         | 1        |
| Por_j5           | 0.103362  | 0.0448775             | 0          | 1         | 1        |
| 2900083l11Rik_j5 | 0.826575  | 0 -1.79769e+308       | 3.42E-08   | 2.12E-06  |          |
| 2900083l11Rik_j6 | 1.29217   | 1.36539               | 0.0795116  | 0.75388   | 0.915071 |
| 2900083l11Rik_j8 | 1.0538    | 0.392713              | -1.42406   | 0.0527628 | 0.266888 |
| Zp3_j1           | 0.0957818 | 0.0911751             | -0.0711124 | 0.951667  | 1        |
| Dtx2_j2          | 1.18387   | 1.75034               | 0          | 1         | 1        |
| Rasa4_j1         | 2.10895   | 2.27624               | 0.110128   | 0.610325  | 0.846502 |
| Alkbh4_j1        | 0.100744  | 0.0292936             | -1.78204   | 0.254328  | 1        |
| 4933404O12Rik    | 1.24415   | 1.00688               | -0.305262  | 0.117794  | 0.427133 |
| Fis1_j1          | 0.517108  | 0.213988              | -1.27294   | 0.314619  | 0.658749 |
| Vgf_j1           | 0.599403  | 1.69786               | 1.50212    | 1.16E-05  | 0.00035  |
| Ache_j3          | 14        | 9.67838               | 0          | 1         | 1        |
| Gigyf1_j1        | 0.613752  | 0.643601              | 0.0685093  | 0.817833  | 0.940908 |
| Gigyf1_j3        | 0.758011  | 0.501801              | -0.595103  | 0.061741  | 0.293749 |
| Gigyf1_j2        | 2.13602   | 1.89896               | -0.169719  | 0.352139  | 0.689187 |
| Gigyf1_j5        | 0.273943  | 0.25972               | -0.076915  | 0.893851  | 0.966325 |
| Act16b_j2        | 1.00689   | 0.478837              | 0          | 1         | 1        |
| Trfr2_j4         | 0.59591   | 0.544441              | -0.130318  | 0.70781   | 0.893525 |
| Trfr2_j1         | 0.150856  | 0.171448              | 0.184605   | 0.761614  | 0.917949 |
| XLOC_025595      | 0.118804  | 0.0715859             | 0          | 1         | 1        |
| BC055004_j2      | 0.0755752 | 0 -1.79769e+308       | 0.0088057  |           | 1        |
| BC055004_j6      | 0.281447  | 0.471958              | 0.745796   | 0.139609  | 0.464749 |
| Zfp157_j1        | 0.0907516 | 0.0543199             | 0          | 1         | 1        |
| Sun1_j5          | 0.333176  | 0.352045              | 0.0794735  | 0.874584  | 0.960128 |
| Sun1_j13         | 0.0646377 | 0 -1.79769e+308       | 0.0186468  |           | 1        |
| Eif3b_j2         | 12.1345   | 17.4715               | 0.525891   | 0.0014648 | 0.019365 |
| XLOC_025616      | 0         | 0.072172 1.79769e+308 | 0.02491    |           | 1        |
| Chst12_j1        | 25.0464   | 24.4932               | 0          | 1         | 1        |
| AA881470_j2      | 0.402411  | 0.418908              | 0.0579625  | 0.903352  | 0.969103 |
| Amz1_j3          | 0.094988  | 0 -1.79769e+308       | 0.0044907  |           | 1        |
| Slc29a4_j2       | 0.086993  | 0.0888901             | 0          | 1         | 1        |
| Slc29a4_j3       | 1.27572   | 1.83533               | 0          | 1         | 1        |
| Daglb_j1         | 4.69062   | 6.71181               | 0.516922   | 0.0010761 | 0.015147 |
| Cyth3_j2         | 0.183367  | 0.0955391             | 0          | 1         | 1        |
| Pms2             | 1.64608   | 1.3717                | 0          | 1         | 1        |
| Rsph10b2_j3      | 0.103478  | 0.0813978             | -0.34626   | 0.797757  | 1        |
| AK153727_j1      | 0.180732  | 0.167814              | -0.106991  | 0.880926  | 0.962093 |
| Trrap_j13        | 4.30712   | 4.09902               | -0.0714431 | 0.602486  | 0.842947 |
| Arpc1b           | 4.23465   | 3.28996               | 0          | 1         | 1        |
| XLOC_025653      | 0.232102  | 0 -1.79769e+308       | 0.0720445  |           | 0.322789 |
| Cdk8_j2          | 0.615982  | 0.596061              | -0.0474273 | 0.951368  | 0.985905 |

|                  |           |                 |            |           |           |
|------------------|-----------|-----------------|------------|-----------|-----------|
| XLOC_025661      | 0.0930638 | 0.111095        | 0.255507   | 0.779489  | 1         |
| Pan3_j4          | 0.680615  | 0.911204        | 0          | 1         | 1         |
| Pomp_j1          | 70.714    | 64.0613         | 0          | 1         | 1         |
| Mtus2_j3         | 3.36342   | 5.42403         | 0          | 1         | 1         |
| AK138849_j5      | 0.140396  | 0.163211        | 0.217236   | 0.692881  | 0.8862    |
| Fry_j5           | 0.0819385 | 0.058642        | 0          | 1         | 1         |
| Fry_j4           | 0.116221  | 0.0393577       | 0          | 1         | 1         |
| Fry_j9           | 0.500214  | 0.138591        | 0          | 1         | 1         |
| Fry_j12          | 10.0912   | 7.13795         | 0          | 1         | 1         |
| Kl               | 0.144426  | 0.199813        | 0.468316   | 0.286137  | 0.634849  |
| Cdk14_j4         | 0.467685  | 0               | 0          | 1         | 1         |
| Cdk14_j6         | 1.90394   | 0.464487        | 0          | 1         | 1         |
| Cldn12           | 0.588561  | 0.550683        | 0          | 1         | 1         |
| A330021E22Rik_j5 | 0.228001  | 0.000773826     | -8.20281   | 0.346191  | 0.685447  |
| A330021E22Rik_j6 | 0.0800229 | 0 -1.79769e+308 |            | 0.0012607 | 1         |
| A330021E22Rik_j7 | 0.111115  | 0.143927        | 0.373286   | 0.549232  | 1         |
| Steap2           | 0.884651  | 0.6448          | 0          | 1         | 1         |
| Crot_j1          | 8.90809   | 12.759          | 0          | 1         | 1         |
| Dmtf1_j4         | 0.768189  | 1.03718         | 0          | 1         | 1         |
| Dmtf1_j3         | 0.817868  | 0.705788        | 0          | 1         | 1         |
| XLOC_025706      | 4.67405   | 7.50628         | 0.683423   | 0.054331  | 0.271902  |
| XLOC_025706      | 4.51239   | 4.58334         | 0.0225075  | 0.952255  | 0.986195  |
| Cd36             | 0.0684681 | 0.0254474       | -1.42792   | 0.360345  | 1         |
| Gnai1_j3         | 0.16742   | 0               | 0          | 1         | 1         |
| Phf2_j2          | 0.183134  | 0.0694082       | -1.39972   | 0.0742339 | 0.328448  |
| Rsb1_j1          | 1.33314   | 1.40065         | 0          | 1         | 1         |
| Orc5_j1          | 4.43071   | 0.896373        | -2.30537   | 4.82E-12  | 6.19E-10  |
| Orc5_j3          | 0.384286  | 0.74351         | 0.952171   | 0.131102  | 0.450672  |
| Srp2_j3          | 3.61546   | 3.77993         | 0          | 1         | 1         |
| Pus7_j1          | 0.464353  | 0.446827        | -0.0555061 | 0.912365  | 0.972389  |
| Pus7             | 0.535909  | 0.611601        | 0.190603   | 0.567672  | 0.824883  |
| Prkag2_j3        | 13.8159   | 8.91971         | 0          | 1         | 1         |
| Mil3_j10         | 0.169531  | 0.0305215       | -2.47365   | 0.0002506 | 0.0046309 |
| Mil3_j11         | 0.155694  | 0 -1.79769e+308 |            | 1.65E-14  | 3.06E-12  |
| Pax1_j8          | 0.558734  | 1.10824         | 0          | 1         | 1         |
| Pax1_j2          | 0.169486  | 0.272985        | 0          | 1         | 1         |
| Lmbr1_j1         | 0.212668  | 0.128985        | -0.721395  | 0.218356  | 0.564799  |
| Lmbr1_j3         | 2.16319   | 1.85649         | -0.220583  | 0.218463  | 0.564868  |
| Tyms_j3          | 0.126727  | 0.0723443       | -0.808773  | 0.578221  | 1         |
| Hadha_j3         | 7.81589   | 7.15855         | 0          | 1         | 1         |
| Mpv17_j2         | 0.147794  | 0.219052        | 0          | 1         | 1         |
| Gtf3c2_j8        | 0.120006  | 0.0414487       | 0          | 1         | 1         |
| Ift172_j1        | 0.784531  | 0.737698        | 0          | 1         | 1         |
| Ift172_j6        | 0.86744   | 1.69903         | 0          | 1         | 1         |
| Fndc4_j1         | 9.31619   | 13.4457         | 0          | 1         | 1         |
| Supt7_j1         | 4.1171    | 4.20077         | 0          | 1         | 1         |
| Pisd_j5          | 2.60736   | 4.46355         | 0          | 1         | 1         |

|                  |           |                 |           |           |           |
|------------------|-----------|-----------------|-----------|-----------|-----------|
| C330019G07Rik_j3 | 0.366031  | 0.143162        | 0         | 1         | 1         |
| Ctbp1_j3         | 0.525358  | 0               | 0         | 1         | 1         |
| Fam53a_j3        | 0.251936  | 0 -1.79769e+308 | 0.0005299 | 0.008558  |           |
| Slbp_j1          | 4.48897   | 4.6644          | 0.0553044 | 0.817721  | 0.940908  |
| Letm1_j1         | 3.53025   | 4.09171         | 0         | 1         | 1         |
| Letm1_j4         | 0.0657203 | 0               | 0         | 1         | 1         |
| Poln_j7          | 0.35216   | 0.444249        | 0.335135  | 0.558933  | 0.820295  |
| Zfyve28          | 2.53235   | 2.05689         | 0         | 1         | 1         |
| Tnip2_j3         | 0.0891012 | 0.0284845       | -1.64527  | 0.124763  | 1         |
| Mfsd10           | 2.89755   | 2.74252         | 0         | 1         | 1         |
| Mfsd10_j2        | 3.69916   | 3.78433         | 0         | 1         | 1         |
| XLOC_025802      | 0.224424  | 0.0655612       | -1.77532  | 0.0109283 | 0.0913896 |
| Htra3_j3         | 0.166594  | 0.261844        | 0.652368  | 0.337942  | 0.678515  |
| Sh3tc1_j7        | 0.111658  | 0.0639087       | -0.805002 | 0.353122  | 1         |
| Msx1             | 0.152501  | 0.184135        | 0.271941  | 0.662539  | 0.872069  |
| Nsg1_j3          | 49.6414   | 76.9923         | 0.63317   | 1.05E-11  | 1.28E-09  |
| Zbtb49           | 0.209605  | 0.0840602       | -1.31818  | 0.0375508 | 0.21489   |
| Zfp509           | 0.365134  | 0.248996        | -0.552302 | 0.14576   | 0.473736  |
| Wdr1_j7          | 0.609734  | 0.417065        | 0         | 1         | 1         |
| Zfp518b_j2       | 0.440279  | 0.30386         | 0         | 1         | 1         |
| Rab28_j1         | 10.2692   | 8.77765         | -0.226414 | 0.155813  | 0.489025  |
| Rab28_j5         | 0.212137  | 0 -1.79769e+308 | 0.037854  | 0.215994  |           |
| Bod1l_j1         | 0.687844  | 0.522431        | -0.396841 | 0.405324  | 0.727023  |
| Bod1l_j3         | 0.0834426 | 0.0437658       | -0.93098  | 0.15077   | 1         |
| Bod1l_j2         | 0.191015  | 0 -1.79769e+308 | 8.14E-14  | 1.36E-11  |           |
| Fgfbp1           | 0.212843  | 0.0322501       | -2.72242  | 0.115235  | 0.422201  |
| Prom1_j4         | 0.425698  | 0 -1.79769e+308 | 3.73E-07  | 1.72E-05  |           |
| Prom1_j5         | 0.187217  | 0.210971        | 0.172335  | 0.759466  | 0.91718   |
| Ldb2             | 4.36945   | 3.24349         | 0         | 1         | 1         |
| Qdpr_j4          | 0.0542627 | 0.0598041       | 0         | 1         | 1         |
| Fam184b_j1       | 0.597408  | 1.65174         | 1.4672    | 6.90E-05  | 0.001569  |
| Lcorl_j1         | 0.472818  | 0.602378        | 0         | 1         | 1         |
| Lcorl            | 0.291453  | 0.078921        | 0         | 1         | 1         |
| Lcorl            | 1.31133   | 1.1664          | 0         | 1         | 1         |
| Kcnip4_j2        | 5.80346   | 4.31241         | -0.428417 | 0.084626  | 0.35511   |
| Gpr125_j1        | 0.512526  | 0               | 0         | 1         | 1         |
| Gpr125_j2        | 0.179678  | 0               | 0         | 1         | 1         |
| Sepsecs_j1       | 0.0852496 | 0               | 0         | 1         | 1         |
| Sel1l3_j3        | 0.474254  | 0.150187        | 0         | 1         | 1         |
| Arap2_j2         | 0.125209  | 0.0696112       | 0         | 1         | 1         |
| Arap2_j3         | 1.5908    | 0.912181        | 0         | 1         | 1         |
| Rfc1_j2          | 0.955843  | 0.972362        | 0         | 1         | 1         |
| Apbb2_j1         | 0.155443  | 0.0983905       | 0         | 1         | 1         |
| Apbb2_j2         | 0.961941  | 0.704314        | 0         | 1         | 1         |
| Atp8a1_j6        | 18.5226   | 17.9196         | 0         | 1         | 1         |
| Kctd8_j4         | 14.8687   | 12.2172         | -0.283375 | 0.0540695 | 0.271004  |
| Kctd8_j8         | 0.0788187 | 0.0194598       | -2.01804  | 0.217561  | 1         |

|                  |           |                 |            |           |           |
|------------------|-----------|-----------------|------------|-----------|-----------|
| Corin_j2         | 0.0571418 | 0.281199        | 2.29897    | 0.0128532 | 0.103285  |
| Nfxl1_j3         | 0.42567   | 0.523594        | 0.298714   | 0.60658   | 0.845067  |
| Gm5868_j1        | 0.0835078 | 0 -1.79769e+308 |            | 0.0468839 | 1         |
| Gm5868           | 0.369183  | 0.128872        | -1.5184    | 0.120544  | 0.432452  |
| Tec              | 0.226396  | 0 -1.79769e+308 |            | 5.04E-05  | 0.0012007 |
| Fryl_j1          | 0.727835  | 0.535701        | 0          | 1         | 1         |
| Fryl             | 0.900732  | 0.997682        | 0          | 1         | 1         |
| Fryl_j2          | 0.703284  | 0.17107         | 0          | 1         | 1         |
| Kdr_j1           | 1.83124   | 1.62392         | -0.173338  | 0.47791   | 0.77269   |
| Clock            | 0.349242  | 0.343399        | -0.0243448 | 0.913508  | 0.972842  |
| Igfbp7_j1        | 1.60467   | 1.89033         | 0.236368   | 0.240648  | 0.588061  |
| Cenpc1_j6        | 0.455412  | 0.142826        | 0          | 1         | 1         |
| Uba6_j1          | 0.123832  | 0.101987        | 0          | 1         | 1         |
| Grsf1            | 18.9691   | 18.9157         | 0          | 1         | 1         |
| Cox18            | 5.19829   | 5.78013         | 0.153065   | 0.405287  | 0.726998  |
| Ankrd17_j4       | 2.07776   | 1.81818         | 0          | 1         | 1         |
| Ankrd17_j3       | 3.10524   | 2.79503         | 0          | 1         | 1         |
| Rassf6           | 0.496775  | 0.36228         | -0.455487  | 0.332067  | 0.673491  |
| Btc              | 0.226432  | 0.285373        | 0.333769   | 0.364793  | 0.698781  |
| Cdkl2_j3         | 0.779236  | 0.751382        | 0          | 1         | 1         |
| G3bp2_j6         | 0.501899  | 0.228921        | 0          | 1         | 1         |
| G3bp2_j7         | 20.3039   | 17.2384         | 0          | 1         | 1         |
| Ppef2_j2         | 0.199456  | 0.301944        | 0.598207   | 0.497882  | 0.783786  |
| Ppef2_j4         | 0.0860028 | 0.0473306       | -0.86161   | 0.521033  | 1         |
| Sdad1_j1         | 2.19973   | 2.27747         | 0.0501011  | 0.794881  | 0.931484  |
| Cxcl11_j1        | 0.135243  | 0.128893        | 0          | 1         | 1         |
| Nup54_j1         | 1.49719   | 1.18063         | 0          | 1         | 1         |
| Antxr2_j3        | 5.54813   | 4.67273         | 0          | 1         | 1         |
| Antxr2_j7        | 0.0923789 | 0               | 0          | 1         | 1         |
| Antxr2_j10       | 3.08512   | 4.45248         | 0          | 1         | 1         |
| Rasgef1b         | 0.647933  | 0.34167         | -0.923243  | 0.0380396 | 0.216694  |
| Rasgef1b_j6      | 0.1576    | 8.43E-05        | -10.8686   | 0.90781   | 0.970964  |
| Rasgef1b_j7      | 0.196589  | 0.475117        | 1.2731     | 0.0108541 | 0.0908619 |
| Hnrpd1_j4        | 8.08359   | 6.46564         | -0.322203  | 0.013909  | 0.108967  |
| Tmem150c_j3      | 11.8149   | 14.1859         | 0          | 1         | 1         |
| 5430416N02Rik_j1 | 1.5971    | 1.77305         | 0.150773   | 0.623551  | 0.852956  |
| Coq2_j1          | 7.89701   | 2.37454         | 0          | 1         | 1         |
| Helq_j4          | 0.444033  | 0.324837        | -0.450952  | 0.330247  | 0.672178  |
| AK133807_j1      | 0.0769757 | 0.108101        | 0.489906   | 0.526616  | 1         |
| Wdfy3_j2         | 1.00601   | 0.765856        | -0.393496  | 0.0720583 | 0.322792  |
| Mapk10_j8        | 0.127271  | 0.0654603       | 0          | 1         | 1         |
| Klhl8_j5         | 0.722831  | 0               | 0          | 1         | 1         |
| Sparcl1_j3       | 11.8523   | 15.0392         | 0          | 1         | 1         |
| Gbp4_j2          | 0.16169   | 0.0574167       | -1.49369   | 0.0587727 | 0.284969  |
| Mpa2l            | 0.839713  | 0.761007        | -0.141987  | 0.63314   | 0.85746   |
| Zfp644_j1        | 0.327613  | 1.00868         | 0          | 1         | 1         |
| Zfp644           | 3.19723   | 0.358493        | 0          | 1         | 1         |

|                  |           |             |               |           |          |
|------------------|-----------|-------------|---------------|-----------|----------|
| Hfm1_j1          | 0.0539773 | 0           | -1.79769e+308 | 0.0193866 | 1        |
| Hfm1_j2          | 0.153981  | 0           | -1.79769e+308 | 7.98E-07  | 3.42E-05 |
| XLOC_025977      | 0.0932611 | 0           | -1.79769e+308 | 0.0020658 | 1        |
| XLOC_025977      | 0.277301  | 0           | -1.79769e+308 | 5.07E-08  | 2.97E-06 |
| XLOC_025977      | 0.0922576 | 0.0571249   | -0.691548     | 0.495539  | 1        |
| Evi5_j1          | 15.0677   | 12.4035     | 0             | 1         | 1        |
| Mfsd7a_j4        | 0.333081  | 0.18209     | -0.871223     | 0.170522  | 0.507473 |
| Cplx1_j2         | 0.451674  | 0.374506    | -0.270292     | 0.47456   | 0.770688 |
| Gak_j1           | 11.5702   | 15.0816     | 0             | 1         | 1        |
| Gak_j2           | 1.07145   | 0.814981    | 0             | 1         | 1        |
| Gak_j3           | 3.37611   | 2.91357     | 0             | 1         | 1        |
| Crlf2            | 4.36374   | 5.96743     | 0.451545      | 0.0158168 | 0.119309 |
| Gtpbp6_j6        | 0.740283  | 0.689592    | 0             | 1         | 1        |
| Gtpbp6_j7        | 1.69424   | 1.97384     | 0             | 1         | 1        |
| Gtpbp6_j8        | 0.165677  | 0.121991    | 0             | 1         | 1        |
| Pgam5            | 8.39805   | 10.3998     | 0             | 1         | 1        |
| Pgam5_j1         | 0.193889  | 0.159809    | 0             | 1         | 1        |
| Fbrsl1_j7        | 1.51777   | 1.89576     | 0.320821      | 0.125377  | 0.441136 |
| Ep400_j5         | 4.22595   | 5.60874     | 0.408401      | 0.0063296 | 0.061076 |
| Ep400_j10        | 1.65586   | 1.52059     | -0.122943     | 0.631058  | 0.8565   |
| Ep400_j14        | 0.452063  | 0.335691    | -0.429389     | 0.206472  | 0.55102  |
| Ulk1_j5          | 1.54991   | 1.22551     | 0             | 1         | 1        |
| AK087393_j1      | 0.164802  | 0.0946595   | -0.799915     | 0.409954  | 0.730025 |
| AK087393_j3      | 0.131445  | 0.0702463   | -0.903967     | 0.277677  | 1        |
| Miat             | 2.37004   | 2.29956     | 0             | 1         | 1        |
| Miat_j7          | 3.98588   | 11.8913     | 0             | 1         | 1        |
| Miat_j10         | 1.20268   | 1.28511     | 0             | 1         | 1        |
| Miat_j6          | 17.1074   | 20.9715     | 0             | 1         | 1        |
| Cryba4_j3        | 0.0859211 | 0           | -1.79769e+308 | 0.0556714 | 1        |
| Asphd2_j1        | 0.139517  | 0           | 0             | 1         | 1        |
| Sez6l_j7         | 1.6891    | 4.26082     | 0             | 1         | 1        |
| Adrbk2_j2        | 0.217686  | 0.215522    | 0             | 1         | 1        |
| Adrbk2_j1        | 0.606428  | 0.000407147 | 0             | 1         | 1        |
| Crybb2_j1        | 0.23193   | 0.15847     | -0.549478     | 0.381166  | 0.711771 |
| Crybb3_j2        | 0.895324  | 1.55834     | 0.799525      | 0.0570167 | 0.279743 |
| 2900026A02Rik_j4 | 0.273071  | 0.368055    | 0.430647      | 0.124183  | 0.439139 |
| Cmklr1_j1        | 0.204744  | 0           | -1.79769e+308 | 1.92E-05  | 0.000537 |
| Sart3_j6         | 1.76449   | 2.24631     | 0             | 1         | 1        |
| Coro1c_j4        | 0.739976  | 0.118912    | 0             | 1         | 1        |
| Kctd10_j2        | 7.24674   | 9.55978     | 0             | 1         | 1        |
| Trpv4_j4         | 0.0630125 | 0           | -1.79769e+308 | 0.0146634 | 1        |
| Trpv4            | 0.159379  | 0.0456995   | -1.80221      | 0.096151  | 0.382865 |
| Git2_j8          | 0.330762  | 0           | 0             | 1         | 1        |
| Git2_j10         | 1.07277   | 0.755731    | 0             | 1         | 1        |
| Git2             | 2.45133   | 3.02633     | 0             | 1         | 1        |
| 2610524H06Rik_j1 | 21.7393   | 23.6197     | 0             | 1         | 1        |
| XLOC_026040      | 0.260577  | 0.209183    | -0.316944     | 0.586101  | 0.834297 |

|                  |           |           |               |           |           |
|------------------|-----------|-----------|---------------|-----------|-----------|
| XLOC_026040      | 0.178117  | 0.172746  | -0.0441707    | 0.969877  | 0.99148   |
| Gm13826_j1       | 5.19396   | 11.3471   | 1.12742       | 1.09E-11  | 1.31E-09  |
| Mlec_j2          | 0.146421  | 0.0885151 | 0             | 1         | 1         |
| Cabp1_j3         | 5.6474    | 3.98397   | 0             | 1         | 1         |
| Rnf10_j5         | 2.39375   | 0         | 0             | 1         | 1         |
| Sirt4_j1         | 0.128466  | 0.336492  | 1.38919       | 0.0505952 | 0.260426  |
| Sirt4_j5         | 0.487148  | 0.416513  | -0.225999     | 0.650788  | 0.86597   |
| Prkab1_j3        | 0.0477739 | 0         | 0             | 1         | 1         |
| Tmem233_j5       | 1.05565   | 0.875939  | 0             | 1         | 1         |
| Tmem233          | 74.0316   | 64.6065   | 0             | 1         | 1         |
| Srrm4_j4         | 0.17321   | 0.190741  | 0             | 1         | 1         |
| Pebp1_j1         | 0.197317  | 0.236366  | 0.260506      | 0.802679  | 0.934384  |
| Pebp1            | 6.66739   | 7.86351   | 0.238051      | 0.219346  | 0.56589   |
| Fbxw8_j5         | 8.89122   | 13.1143   | 0             | 1         | 1         |
| Rnft2_j9         | 1.917     | 2.50793   | 0             | 1         | 1         |
| Rnft2_j3         | 2.18587   | 2.05913   | 0             | 1         | 1         |
| Rnft2_j4         | 1.74424   | 0.867071  | 0             | 1         | 1         |
| XLOC_026065      | 0.152333  | 0.096736  | -0.655105     | 0.464276  | 0.764619  |
| Sdsl_j2          | 0.119445  | 0         | -1.79769e+308 | 0.0129451 | 1         |
| Tpcn1_j3         | 4.10475   | 3.0945    | 0             | 1         | 1         |
| Oas2_j3          | 0.115535  | 1.57E-05  | -12.8421      | 0.968103  | 1         |
| Rph3a_j1         | 0.571819  | 0.132424  | 0             | 1         | 1         |
| Rph3a_j2         | 1.46536   | 0         | 0             | 1         | 1         |
| Trafd1_j1        | 0.161133  | 0.017758  | -3.18171      | 0.0703288 | 0.318545  |
| Trafd1_j3        | 0.047652  | 0         | -1.79769e+308 | 0.0350542 | 1         |
| Cux2_j9          | 0.162501  | 6.49E-05  | -11.2904      | 0.822054  | 0.942583  |
| Cux2_j10         | 1.42025   | 0.715484  | -0.989158     | 3.09E-06  | 0.0001115 |
| Ccdc63_j2        | 0.0680688 | 0.0600818 | -0.180065     | 0.877737  | 1         |
| Rad9b_j1         | 0.321809  | 0.130883  | -1.29792      | 0.0330868 | 0.198267  |
| 1500011H22Rik_j1 | 21.6245   | 21.5975   | -0.0018007    | 0.991756  | 0.997561  |
| Atp2a2           | 46.4127   | 35.5863   | 0             | 1         | 1         |
| Ift81_j4         | 1.29246   | 1.42854   | 0.144417      | 0.653275  | 0.867396  |
| Anapc5_j4        | 0.5536    | 0.658731  | 0             | 1         | 1         |
| Kdm2b_j13        | 0.951598  | 0.680954  | -0.482795     | 0.120729  | 0.432763  |
| AI480526_j1      | 1.21831   | 0.970576  | -0.327968     | 0.156033  | 0.489534  |
| Diablo_j1        | 0.378988  | 0.251171  | 0             | 1         | 1         |
| Clip1_j7         | 0.108658  | 0         | 0             | 1         | 1         |
| Clip1            | 0.825761  | 0.714923  | 0             | 1         | 1         |
| Rsrc2            | 5.27105   | 7.1516    | 0             | 1         | 1         |
| Abcb9_j1         | 4.0642    | 3.54626   | 0             | 1         | 1         |
| Mphosph9_j9      | 0.261532  | 0.147143  | 0             | 1         | 1         |
| Ccdc92_j8        | 0.303183  | 0.230822  | 0             | 1         | 1         |
| Ccdc92_j9        | 7.66747   | 6.65195   | 0             | 1         | 1         |
| Ncor2_j11        | 12.1467   | 13.6649   | 0.169915      | 0.167492  | 0.504072  |
| Ncor2_j13        | 0.576942  | 0.761439  | 0.400304      | 0.105931  | 0.404127  |
| Ncor2_j14        | 1.12857   | 1.01199   | -0.157305     | 0.414826  | 0.73287   |
| Ubb_j1           | 189.112   | 186.101   | 0             | 1         | 1         |

|                  |            |           |               |           |           |
|------------------|------------|-----------|---------------|-----------|-----------|
| Dhx37_j2         | 0.95553    | 0.664158  | -0.524774     | 0.328983  | 0.671315  |
| XLOC_026130      | 0.176311   | 0         | -1.79769e+308 | 0.0011516 | 0.0160008 |
| Slc15a4_j4       | 0          | 0.225929  | 0             | 1         | 1         |
| Slc15a4_j7       | 0.55174    | 0         | 0             | 1         | 1         |
| Slc15a4_j6       | 1.69689    | 2.71276   | 0             | 1         | 1         |
| 5930412G12Rik_j5 | 0.106547   | 0.117199  | 0.137467      | 0.879421  | 1         |
| Rimbp2_j10       | 0.197134   | 0.149131  | 0             | 1         | 1         |
| Rimbp2_j11       | 0.628375   | 0.335451  | 0             | 1         | 1         |
| Auts2_j9         | 0.117342   | 0         | 0             | 1         | 1         |
| Auts2_j10        | 1.27262    | 0.919788  | 0             | 1         | 1         |
| Auts2_j11        | 0.276359   | 0         | 0             | 1         | 1         |
| Auts2_j12        | 0.551796   | 0         | 0             | 1         | 1         |
| Gtf2i_j6         | 0.359975   | 0.850905  | 0             | 1         | 1         |
| Gtf2i_j3         | 4.92246    | 7.26428   | 0             | 1         | 1         |
| Gtf2ird1_j4      | 1.1941     | 1.28349   | 0             | 1         | 1         |
| Gtf2ird1_j5      | 0.815408   | 1.32298   | 0             | 1         | 1         |
| Gtf2ird1_j7      | 0.352703   | 0.184185  | 0             | 1         | 1         |
| Lat2_j2          | 0.0475854  | 0.0420461 | -0.178547     | 0.917316  | 1         |
| Lat2_j3          | 0.0585838  | 0.0583281 | -0.00631039   | 0.996203  | 1         |
| Lat2             | 0.186978   | 0.593514  | 1.66641       | 0.0011388 | 0.0158644 |
| Limk1_j3         | 4.77069    | 7.18784   | 0.591361      | 0.0029012 | 0.0335238 |
| XLOC_026158      | 0.101045   | 0.082775  | -0.287732     | 0.846884  | 1         |
| Eln_j3           | 0.106005   | 0.0575975 | -0.88006      | 0.373467  | 1         |
| Eln_j4           | 0.107891   | 0.0533067 | -1.01719      | 0.271847  | 1         |
| Wbscr25_j1       | 0.173385   | 0.0849886 | -1.02864      | 0.270649  | 0.619795  |
| Pom121_j2        | 4.74005    | 4.86436   | 0             | 1         | 1         |
| Hip1_j1          | 1.85389    | 0.515903  | 0             | 1         | 1         |
| Ccl24            | 0.119878   | 0.106769  | -0.167072     | 0.833301  | 1         |
| Sh2b2_j2         | 0.0873371  | 0         | -1.79769e+308 | 0.0049009 | 1         |
| Cux1_j1          | 0.0818757  | 0         | 0             | 1         | 1         |
| Emid2_j1         | 0.177228   | 0.102358  | -0.791985     | 0.389666  | 0.716747  |
| Emid2_j2         | 0.081144   | 0         | -1.79769e+308 | 0.0087548 | 1         |
| Znhit1_j1        | 9.4378     | 8.99104   | 0             | 1         | 1         |
| Gnb2_j4          | 0.00945168 | 0.0623499 | 2.72174       | 0.0619991 | 1         |
| Agfg2_j4         | 1.80465    | 1.2969    | 0             | 1         | 1         |
| Pilrb2_j1        | 0.237363   | 0.111338  | -1.09216      | 0.418529  | 0.735334  |
| Gjc3_j1          | 3.90319    | 2.22236   | 0             | 1         | 1         |
| BC037034_j7      | 1.05781    | 1.7223    | 0.70326       | 0.0222886 | 0.151988  |
| Gpc2_j8          | 0.0972629  | 0.257463  | 1.4044        | 0.0479149 | 0.251648  |
| Prkar1b_j4       | 2.09412    | 0.806552  | 0             | 1         | 1         |
| Adap1_j1         | 7.92739    | 15.0479   | 0             | 1         | 1         |
| Adap1_j2         | 58.3111    | 54.6164   | 0             | 1         | 1         |
| Ints1_j1         | 7.36957    | 7.22581   | 0             | 1         | 1         |
| Ints1_j2         | 0.431829   | 0.3248    | 0             | 1         | 1         |
| XLOC_026221      | 0.0858876  | 0.0855594 | -0.00552229   | 0.995165  | 1         |
| XLOC_026221      | 0.0762743  | 0         | -1.79769e+308 | 0.0103681 | 1         |
| Ttyh3_j4         | 5.47525    | 4.98724   | 0             | 1         | 1         |

|                  |             |                       |             |           |           |
|------------------|-------------|-----------------------|-------------|-----------|-----------|
| lqce             | 0.070432    | 0.0862202             | 0.291796    | 0.671363  | 1         |
| Card11_j8        | 0.14176     | 0.179917              | 0.343887    | 0.505111  | 0.788062  |
| Tnrc18_j2        | 0.940289    | 0.343862              | 0           | 1         | 1         |
| Zfp316_j1        | 0.168801    | 0.125399              | -0.428806   | 0.382898  | 0.712805  |
| Zdhhc4_j5        | 4.17581     | 4.39307               | 0           | 1         | 1         |
| Rac1_j1          | 19.5028     | 10.8036               | 0           | 1         | 1         |
| Baiap211_j1      | 2.27172     | 1.71083               | -0.409091   | 0.0008848 | 0.0129752 |
| Tmem130_j2       | 13.8662     | 13.6945               | 0           | 1         | 1         |
| Tmem130_j3       | 5.60308     | 9.25247               | 0           | 1         | 1         |
| Tmem130_j4       | 26.5392     | 23.3667               | 0           | 1         | 1         |
| Zkscan14_j3      | 1.4039      | 1.82111               | 0.375376    | 0.148684  | 0.477528  |
| Usp12_j3         | 2.80345     | 12.0718               | 0           | 1         | 1         |
| Lnx2             | 0.454445    | 0.598664              | 0           | 1         | 1         |
| Ubl3_j1          | 2.9315      | 0.873816              | 0           | 1         | 1         |
| Ubl3_j3          | 3.83177     | 2.69983               | 0           | 1         | 1         |
| Katnal1_j4       | 1.11935     | 2.59814               | 0           | 1         | 1         |
| Gm15411          | 0.373726    | 0.17372               | -1.10522    | 0.411446  | 0.730688  |
| Gm15411_j1       | 0.239164    | 0 -1.79769e+308       | 0.0009318   | 0.0135135 |           |
| Hsph1            | 0.101878    | 0.115126              | 0           | 1         | 1         |
| N4bp211          | 0.423799    | 0.506123              | 0.256109    | 0.343661  | 0.683672  |
| N4bp212          | 3.69085     | 4.1015                | 0.152199    | 0.390305  | 0.717218  |
| Stard13_j2       | 2.51741     | 1.70297               | 0           | 1         | 1         |
| Stard13_j8       | 0.073908    | 0                     | 0           | 1         | 1         |
| Cdk6_j2          | 0.0816766   | 0.177825              | 1.12246     | 0.169564  | 0.506541  |
| Krit1_j1         | 0.798337    | 0.623813              | 0           | 1         | 1         |
| Akap9_j2         | 0           | 0.201669              | 0           | 1         | 1         |
| Slc25a40_j9      | 0.000360012 | 0.939961              | 11.3503     | 0.735314  | 0.906704  |
| 4930420K17Rik_j1 | 2.37173     | 2.13553               | 0           | 1         | 1         |
| XLOC_025095      | 0.368906    | 0.450636              | 0.288711    | 0.692132  | 0.886057  |
| Speer1-ps1_j1    | 0.143741    | 0.282431              | 0.974424    | 0.233414  | 0.580722  |
| XLOC_025099      | 6.40423     | 6.36831               | -0.00811464 | 0.970501  | 0.991645  |
| XLOC_025101      | 13.759      | 17.8867               | 0.378518    | 0.0250006 | 0.164296  |
| Pclo_j7          | 1.40478     | 1.19475               | 0           | 1         | 1         |
| Pclo_j9          | 5.90515     | 4.20475               | 0           | 1         | 1         |
| Hgf_j3           | 0.961976    | 0.890489              | -0.111403   | 0.632652  | 0.857248  |
| Magi2_j10        | 0           | 0.198064 1.79769e+308 | 0.0006604   | 0.0102517 |           |
| Pion_j1          | 0.119362    | 0.102576              | 0           | 1         | 1         |
| Armc10_j4        | 4.96162     | 5.65755               | 0.189367    | 0.261666  | 0.610795  |
| Lhfpl3_j5        | 3.9276      | 3.52244               | 0           | 1         | 1         |
| Lhfpl3_j4        | 9.31774     | 9.75491               | 0           | 1         | 1         |
| Chpf2_j1         | 8.14304     | 9.36732               | 0.20207     | 0.0889464 | 0.365503  |
| Nub1_j1          | 1.39304     | 0.377342              | 0           | 1         | 1         |
| 4831440E17Rik    | 0.352214    | 0.35352               | 0.00533792  | 0.985683  | 0.995737  |
| Gm7361_j4        | 0           | 0.070342 1.79769e+308 | 0.0364352   | 1         |           |
| Gm7361_j3        | 0           | 0.106651 1.79769e+308 | 0.009567    | 1         |           |
| Gm7361           | 0.0779211   | 0.340235              | 2.12645     | 0.0012999 | 0.0176389 |
| Dpp6_j6          | 54.0117     | 51.8797               | 0           | 1         | 1         |



|                  |           |           |              |           |           |
|------------------|-----------|-----------|--------------|-----------|-----------|
| 9530036O11Rik_j3 | 2.91E-05  | 0.309178  | 13.3732      | 0.978574  | 0.993756  |
| 9530036O11Rik_j2 | 0         | 0.147963  | 1.79769e+308 | 0.0422435 | 1         |
| 9530036O11Rik_j1 | 0.519041  | 0.313565  | -0.727084    | 0.202444  | 0.546078  |
| 9530036O11Rik_j5 | 0.163674  | 0.188811  | 0.206117     | 0.775058  | 0.923761  |
| Rnf32            | 0.0905465 | 0.193893  | 1.09853      | 0.0627971 | 0.296803  |
| Dnajb6_j1        | 0.219091  | 0.208911  | -0.0686417   | 0.920719  | 0.975195  |
| Il6              | 0.148895  | 0.565082  | 1.92417      | 0.010207  | 0.0868023 |
| Il6_j1           | 0         | 0.40149   | 1.79769e+308 | 0.0008749 | 0.0128487 |
| Hadhb_j2         | 2.90273   | 2.5105    | -0.209435    | 0.195507  | 0.537978  |
| Ept1_j3          | 0         | 0.0501753 | 0            | 1         | 1         |
| Ept1_j2          | 0.163206  | 0.351897  | 0            | 1         | 1         |
| Gm1060_j4        | 0.010098  | 0.117848  | 3.54479      | 0.11854   | 1         |
| Tmem214_j4       | 27.8542   | 24.5725   | -0.18085     | 0.0416966 | 0.230393  |
| Tmem214_j5       | 2.31328   | 2.4814    | 0.101218     | 0.394455  | 0.719811  |
| Trim54_j1        | 0.0825429 | 0.440024  | 2.41437      | 0.0003156 | 0.0055714 |
| Snx17_j5         | 0.424842  | 0.434131  | 0            | 1         | 1         |
| Nrbp1_j4         | 0.159992  | 0.205097  | 0            | 1         | 1         |
| Zfp512_j2        | 0.315088  | 0.205637  | 0            | 1         | 1         |
| Zfp512_j6        | 0.256873  | 0.320628  | 0            | 1         | 1         |
| Bre_j2           | 0.604763  | 1.07708   | 0            | 1         | 1         |
| Bre_j3           | 21.096    | 20.1868   | 0            | 1         | 1         |
| Yes1_j1          | 1.87901   | 1.99048   | 0.0831429    | 0.670236  | 0.875235  |
| Depdc5_j9        | 0.833401  | 0.282756  | -1.55945     | 3.76E-05  | 0.000936  |
| Depdc5_j10       | 0.109717  | 0.951967  | 3.11713      | 2.51E-06  | 9.31E-05  |
| Fgfr3_j1         | 0.0571659 | 0.116847  | 1.03139      | 0.405472  | 1         |
| Fgfr3_j4         | 0.0835061 | 0.0580198 | -0.525334    | 0.721016  | 1         |
| Whsc1_j7         | 0.759777  | 0.863196  | 0            | 1         | 1         |
| Nat8l_j3         | 39.2354   | 39.825    | 0            | 1         | 1         |
| XLOC_025191      | 0.107289  | 0.115483  | 0            | 1         | 1         |
| XLOC_025191      | 0.0428933 | 0.0610561 | 0            | 1         | 1         |
| Sh3bp2_j1        | 0         | 0.105966  | 1.79769e+308 | 0.0167719 | 1         |
| Sh3bp2_j2        | 0.0671853 | 0.205282  | 1.61139      | 0.0639589 | 0.30009   |
| Add1             | 0.302674  | 0.336237  | 0            | 1         | 1         |
| Grk4_j5          | 0.0808368 | 0.11483   | 0.506421     | 0.617396  | 1         |
| Dok7_j1          | 0.325498  | 0.243408  | 0            | 1         | 1         |
| XLOC_025200      | 0.123551  | 0.223212  | 0.853312     | 0.218925  | 0.565222  |
| XLOC_025202      | 0.0806353 | 0.212699  | 1.39933      | 0.0151452 | 0.115712  |
| Acox3_j4         | 6.64601   | 6.71219   | 0            | 1         | 1         |
| Jakmip1_j3       | 2.51532   | 2.43712   | -0.0455678   | 0.836102  | 0.94739   |
| Evc2_j2          | 0         | 0.0565943 | 1.79769e+308 | 0.0480385 | 1         |
| Evc2_j3          | 0.0999461 | 0.125037  | 0.323138     | 0.669607  | 1         |
| Lyar_j5          | 0.164622  | 0.659431  | 2.00206      | 0.0198728 | 0.140203  |
| Cpeb2_j4         | 11.2773   | 10.5734   | 0            | 1         | 1         |
| C1qtnf7          | 0         | 0.0808385 | 1.79769e+308 | 0.0156789 | 1         |
| Cc2d2a_j7        | 0.0645241 | 0.0315244 | 0            | 1         | 1         |
| Bst1             | 0.0385557 | 0.0477683 | 0.30911      | 0.868894  | 1         |
| Lap3_j1          | 10.6396   | 9.40722   | 0            | 1         | 1         |

|                  |           |                       |           |           |           |
|------------------|-----------|-----------------------|-----------|-----------|-----------|
| XLOC_025238      | 0.0216938 | 0.10311               | 2.24883   | 0.352187  | 1         |
| AK080411_j1      | 0.192765  | 0.418049              | 1.11683   | 0.001957  | 0.0245839 |
| Slit2_j2         | 0.0201359 | 0.052521              | 0         | 1         | 1         |
| Slit2_j11        | 0.828679  | 0.661033              | 0         | 1         | 1         |
| Zcchc4_j2        | 0.700852  | 0.462294              | -0.600298 | 0.223134  | 0.570227  |
| Anapc4_j3        | 0.119801  | 0.177253              | 0.565167  | 0.562508  | 0.822198  |
| XLOC_025250      | 0         | 1.11147               | 0         | 1         | 1         |
| Tbc1d19_j1       | 4.59987   | 7.17509               | 0         | 1         | 1         |
| Stim2_j1         | 9.15583   | 11.4525               | 0.322902  | 0.0051622 | 0.0519296 |
| Pcdh7_j6         | 1.69148   | 1.57003               | 0         | 1         | 1         |
| Pgm1_j5          | 0.603304  | 0.836278              | 0.471097  | 0.0777922 | 0.337705  |
| Klhl5_j2         | 8.25157   | 11.2807               | 0         | 1         | 1         |
| Lias_j1          | 3.0962    | 3.6962                | 0         | 1         | 1         |
| Ube2k_j1         | 23.5155   | 24.7864               | 0         | 1         | 1         |
| N4bp2_j4         | 0.260827  | 0.216972              | -0.265584 | 0.702506  | 0.890965  |
| Uchl1_j6         | 0.647358  | 1.87791               | 0         | 1         | 1         |
| XLOC_025277      | 0.0692552 | 0.121001              | 0.805024  | 0.347086  | 1         |
| XLOC_025280      | 0.0167682 | 0.342472              | 4.35219   | 0.184927  | 0.525175  |
| Atp10d_j2        | 0.0951586 | 0.148457              | 0.641638  | 0.511542  | 1         |
| Atp10d_j7        | 0.0532717 | 0 -1.79769e+308       | 0.0096417 | 0.0096417 | 1         |
| Nipal1           | 0.11775   | 0.169565              | 0.526115  | 0.314001  | 0.658298  |
| Slc10a4_j3       | 0.113075  | 0.0719048             | -0.653121 | 0.655796  | 1         |
| Dcun1d4_j1       | 1.50559   | 2.29368               | 0         | 1         | 1         |
| Dcun1d4_j2       | 6.28406   | 5.70006               | 0         | 1         | 1         |
| Pdgfra_j2        | 0         | 0.0567909             | 0         | 1         | 1         |
| Pdgfra           | 0.311328  | 0.251925              | 0         | 1         | 1         |
| Gm7271_j1        | 21.0577   | 14.9925               | 0         | 1         | 1         |
| Exoc1_j1         | 3.92791   | 3.55726               | 0         | 1         | 1         |
| Exoc1_j4         | 13.7284   | 15.7058               | 0         | 1         | 1         |
| Cep135_j2        | 0         | 0.108735 1.79769e+308 | 0.0050736 | 0.0050736 | 1         |
| Cep135_j4        | 0.226636  | 0.000189797           | -10.2217  | 0.612805  | 0.847359  |
| C530008M17Rik_j4 | 0.731707  | 0.992178              | 0         | 1         | 1         |
| Mthfr-ps1        | 0.958553  | 0.793609              | -0.272431 | 0.464763  | 0.764951  |
| Lphn3_j3         | 0.0428703 | 0.100805              | 1.23352   | 0.073284  | 1         |
| Lphn3_j7         | 0.0636056 | 0 -1.79769e+308       | 6.80E-06  | 6.80E-06  | 1         |
| Stap1_j1         | 0.0128691 | 0.054245              | 2.07558   | 0.433676  | 1         |
| XLOC_025323      | 0.0627832 | 0.0834441             | 0.410432  | 0.680058  | 1         |
| Mthfd2l_j4       | 0.397026  | 0.456665              | 0.201901  | 0.694518  | 0.887364  |
| Art3_j3          | 3.90187   | 3.99443               | 0         | 1         | 1         |
| Art3_j4          | 0.846712  | 0.280869              | 0         | 1         | 1         |
| Stbd1_j2         | 37.9414   | 35.1267               | -0.111204 | 0.255915  | 0.604659  |
| Shroom3_j5       | 2.10419   | 1.89656               | -0.149879 | 0.539065  | 0.808324  |
| Mrpl1_j1         | 3.56789   | 3.7864                | 0         | 1         | 1         |
| Fras1_j1         | 0.118499  | 0.0975114             | -0.281229 | 0.737005  | 1         |
| Fras1_j2         | 0.0281167 | 0.0590308             | 1.07004   | 0.151671  | 1         |
| Anxa3_j3         | 0         | 0.598872 1.79769e+308 | 0.0002994 | 0.0002994 | 0.005336  |
| Bmp2k_j3         | 0.708563  | 0.503868              | -0.491851 | 0.394408  | 0.719811  |

|                  |           |           |              |           |           |
|------------------|-----------|-----------|--------------|-----------|-----------|
| Bmp2k_j5         | 0.195741  | 0.408517  | 1.06145      | 0.0050663 | 0.0512081 |
| Prdm8_j2         | 0.502454  | 0.236661  | 0            | 1         | 1         |
| Enoph1_j1        | 12.6979   | 11.8249   | -0.102765    | 0.456749  | 0.760049  |
| Mrps18c_j4       | 4.28952   | 3.27843   | 0            | 1         | 1         |
| Cds1_j2          | 0.0647543 | 0.0707468 | 0            | 1         | 1         |
| Cds1_j5          | 0         | 0.0511189 | 0            | 1         | 1         |
| Arhgap24_j2      | 0         | 0.684862  | 0            | 1         | 1         |
| Ptpn13_j11       | 0.536673  | 0.849403  | 0.662404     | 0.025488  | 0.166511  |
| lbsp_j2          | 4.09E-05  | 0.607607  | 13.858       | 0.955494  | 0.987197  |
| Spp1_j1          | 41.6955   | 48.2142   | 0            | 1         | 1         |
| D930016D06Rik_j9 | 1.65906   | 1.21657   | 0            | 1         | 1         |
| Lrrc8d_j8        | 0.108193  | 0.156329  | 0            | 1         | 1         |
| Cdc7_j1          | 0.312296  | 0.27281   | -0.195018    | 0.714749  | 0.896683  |
| Btbd8_j3         | 0.0977456 | 0.0440428 | -1.15013     | 0.197448  | 1         |
| Btbd8_j5         | 0         | 0.0933311 | 1.79769e+308 | 0.0076971 | 1         |
| Btbd8_j6         | 0.22242   | 0.569511  | 1.35644      | 0.0002725 | 0.0049443 |
| Rpl5_j3          | 5.60797   | 5.31746   | 0            | 1         | 1         |
| Mtf2_j3          | 0.620433  | 0.536443  | 0            | 1         | 1         |
| AK141638_j2      | 0.163193  | 0.245966  | 0            | 1         | 1         |
| Idua_j6          | 0.843426  | 0.733258  | 0            | 1         | 1         |
| XLOC_025401      | 0.114205  | 0.125687  | 0            | 1         | 1         |
| XLOC_025402      | 0.283971  | 0.276994  | -0.0358901   | 0.944652  | 0.983577  |
| Zfp605_j4        | 0.598057  | 0.692672  | 0            | 1         | 1         |
| Chfr_j1          | 0.437966  | 0.68522   | 0.645748     | 0.0914895 | 0.371729  |
| Golga3_j2        | 2.78059   | 2.41812   | 0            | 1         | 1         |
| Pole_j4          | 0         | 0.0613943 | 1.79769e+308 | 0.0078218 | 1         |
| Galnt9_j1        | 0.147134  | 0.306189  | 1.0573       | 0.109644  | 0.412055  |
| Galnt9_j2        | 1.17153   | 2.7322    | 1.22167      | 0.000126  | 0.0026023 |
| Chek2_j1         | 0         | 0.110377  | 1.79769e+308 | 0.038046  | 1         |
| Chek2_j11        | 0         | 0.302429  | 1.79769e+308 | 0.0025262 | 0.0300979 |
| Ttc28_j6         | 0.0572983 | 0.117898  | 1.04097      | 0.0543337 | 1         |
| Ttc28_j7         | 0         | 0.141164  | 1.79769e+308 | 1.64E-05  | 1         |
| Crybb1_j3        | 0.370356  | 0.448351  | 0.275717     | 0.753926  | 0.915071  |
| Tfip11_j2        | 9.83757   | 9.70901   | 0            | 1         | 1         |
| Hps4_j3          | 2.87524   | 3.63702   | 0            | 1         | 1         |
| Wscd2_j2         | 0         | 0.0656714 | 1.79769e+308 | 0.02374   | 1         |
| Wscd2_j1         | 0         | 0.0656029 | 1.79769e+308 | 0.0234393 | 1         |
| Ficd_j2          | 0.502452  | 0.725008  | 0.529012     | 0.147693  | 0.476357  |
| Iscu_j3          | 0.865285  | 0.634283  | -0.448049    | 0.263611  | 0.612408  |
| Iscu_j8          | 0.252542  | 0.302696  | 0.261347     | 0.788844  | 0.929526  |
| Acacb_j1         | 0.0900668 | 0.100533  | 0.158599     | 0.869397  | 1         |
| Acacb_j10        | 0.595354  | 0.470578  | -0.339314    | 0.358167  | 0.693687  |
| XLOC_025429      | 0.152349  | 0.170359  | 0.161198     | 0.793593  | 0.931169  |
| Tchp_j1          | 0         | 0.0498966 | 1.79769e+308 | 0.0823526 | 1         |
| Oasl1_j1         | 0.195374  | 0.158442  | -0.302283    | 0.734344  | 0.906333  |
| Sppl3_j8         | 3.24466   | 1.52849   | -1.08596     | 0.002201  | 0.0269135 |
| Pop5             | 28.7293   | 35.0337   | 0            | 1         | 1         |

|                  |           |           |              |           |           |
|------------------|-----------|-----------|--------------|-----------|-----------|
| Pop5_j3          | 49.1275   | 63.0274   | 0            | 1         | 1         |
| Gm13830          | 0.264754  | 0.203316  | -0.380927    | 0.606658  | 0.845067  |
| Gm13830_j1       | 0         | 0.199624  | 1.79769e+308 | 0.0133506 | 0.105972  |
| Msi1_j3          | 0.136731  | 0.212602  | 0            | 1         | 1         |
| Gcn111_j1        | 0         | 0.271332  | 0            | 1         | 1         |
| Cit_j4           | 0.212119  | 0.212952  | 0.00565278   | 0.987164  | 0.996309  |
| Cit_j14          | 0.870626  | 1.22554   | 0.49329      | 0.0660277 | 0.30674   |
| AK049264         | 0.217978  | 0.168363  | -0.372609    | 0.612943  | 0.84737   |
| Taok3_j1         | 1.03016   | 0.861954  | 0            | 1         | 1         |
| Vsig10_j2        | 0.0450319 | 0.275316  | 2.61207      | 0.0003513 | 0.006069  |
| Ksr2_j2          | 0         | 0.136867  | 1.79769e+308 | 1.11E-06  | 1         |
| Ksr2_j5          | 0         | 0.190153  | 1.79769e+308 | 4.16E-07  | 1.90E-05  |
| Fbxo21_j4        | 0         | 0.0548759 | 0            | 1         | 1         |
| Med13l           | 1.09553   | 1.59724   | 0            | 1         | 1         |
| Med13l_j5        | 0.242152  | 0.240891  | 0            | 1         | 1         |
| Slc24a6_j1       | 0.151531  | 0.26263   | 0.793423     | 0.20799   | 0.552233  |
| Oas1b_j1         | 0.0413609 | 0.151227  | 0            | 1         | 1         |
| mKIAA0614_j1     | 0.971476  | 0.643712  | -0.593761    | 0.0278301 | 0.17685   |
| Atxn2_j8         | 11.9408   | 11.9128   | 0            | 1         | 1         |
| XLOC_025494      | 0.0327247 | 0.0833737 | 1.34921      | 0.359349  | 1         |
| Wdr66_j7         | 0.115032  | 0.153057  | 0.41204      | 0.678072  | 1         |
| Ccdc62_j1        | 9.21302   | 8.75105   | -0.0742171   | 0.622816  | 0.852434  |
| Ccdc62_j6        | 0.216111  | 0.209619  | -0.0439976   | 0.937278  | 0.980746  |
| Tmed2_j1         | 29.4993   | 29.665    | 0.00808378   | 0.937647  | 0.980969  |
| Tctn2_j2         | 1.22145   | 0.762253  | -0.680248    | 0.0353656 | 0.207183  |
| Dnahc10_j4       | 0         | 0.108312  | 1.79769e+308 | 0.0530229 | 1         |
| XLOC_025519      | 0.140277  | 0.329042  | 1.22999      | 0.0030476 | 0.0348771 |
| Aacs_j2          | 0.626126  | 1.92832   | 0            | 1         | 1         |
| XLOC_025526      | 0.0445062 | 0.0556752 | 0.323028     | 0.642062  | 1         |
| XLOC_025527      | 0.0584332 | 0.0719167 | 0.299539     | 0.844813  | 1         |
| Fzd10            | 0.237125  | 0.445543  | 0.909919     | 0.0036289 | 0.0400522 |
| Ran_j4           | 1.15762   | 2.1414    | 0            | 1         | 1         |
| Mmp17_j3         | 1.05263   | 1.35565   | 0            | 1         | 1         |
| Mrps17_j2        | 2.47548   | 2.34628   | -0.0773349   | 0.777669  | 0.924833  |
| Cct6a_j2         | 0.035712  | 0.252049  | 0            | 1         | 1         |
| 0610007L01Rik_j1 | 7.97938   | 7.45362   | -0.098336    | 0.603391  | 0.843376  |
| Wbscr27_j4       | 0.55538   | 0.457557  | -0.279526    | 0.635388  | 0.8586    |
| Mdh2_j2          | 0         | 0.260049  | 1.79769e+308 | 0.0598191 | 0.287845  |
| 2900083111Rik_j7 | 0.0546288 | 0.11629   | 1.09         | 0.48988   | 1         |
| Rasa4_j6         | 2.67293   | 1.99341   | -0.423184    | 0.13797   | 0.461744  |
| XLOC_025579      | 0.445871  | 0.927888  | 1.05733      | 4.55E-07  | 2.06E-05  |
| Vgf_j5           | 0         | 0.190615  | 1.79769e+308 | 0.0206194 | 0.143907  |
| Actl6b_j4        | 3.03098   | 3.67567   | 0            | 1         | 1         |
| BC055004_j3      | 0         | 0.204329  | 1.79769e+308 | 4.24E-05  | 0.001037  |
| 0910001L09Rik_j1 | 0.341702  | 0.334047  | -0.0326884   | 0.923893  | 0.976306  |
| Stag3_j4         | 0.0532331 | 0.104155  | 0.968339     | 0.483051  | 1         |
| Sun1_j7          | 1.98496   | 1.29651   | -0.614475    | 0.0094203 | 0.0819942 |

|                  |            |           |              |           |           |
|------------------|------------|-----------|--------------|-----------|-----------|
| Sun1_j8          | 1.26355    | 1.23351   | -0.0347153   | 0.887195  | 0.964184  |
| Gpr30_j2         | 0          | 0.0869936 | 0            | 1         | 1         |
| C330006K01Rik_j1 | 1.56602    | 1.83681   | 0            | 1         | 1         |
| Slc29a4_j4       | 11.6819    | 14.8805   | 0            | 1         | 1         |
| Fscn1_j2         | 3.44574    | 18.3374   | 0            | 1         | 1         |
| Zfp12_j2         | 0.770985   | 0.816349  | 0.082483     | 0.749269  | 0.912938  |
| Grid2ip_j1       | 0.00261674 | 0.221021  | 0            | 1         | 1         |
| Grid2ip_j2       | 0.428655   | 0.244638  | 0            | 1         | 1         |
| AK005905_j1      | 2.12238    | 1.7491    | -0.279065    | 0.183005  | 0.523488  |
| Rsph10b2_j4      | 0.062115   | 0.0833178 | 0.423683     | 0.672058  | 1         |
| Lmtk2_j1         | 1.14561    | 0.605419  | 0            | 1         | 1         |
| Nptx2_j1         | 44.8698    | 44.5644   | -0.00985293  | 0.915845  | 0.973762  |
| XLOC_025644      | 0.148421   | 0.272447  | 0.876276     | 0.335973  | 0.676511  |
| Trrap_j1         | 0.32266    | 0.273633  | -0.237771    | 0.396733  | 0.721313  |
| Trrap_j9         | 0.0890738  | 0.131327  | 0.560089     | 0.305168  | 1         |
| Trrap_j10        | 0.0276119  | 0.0861209 | 1.64108      | 0.0467097 | 1         |
| Trrap_j15        | 1.72439    | 1.96315   | 0.187083     | 0.451598  | 0.756717  |
| Zkscan5_j2       | 0.946005   | 1.56153   | 0            | 1         | 1         |
| Zfp498_j1        | 0.399598   | 0.701778  | 0.812466     | 0.0320029 | 0.193988  |
| Cdk8_j7          | 0.842749   | 1.85471   | 1.13802      | 0.284292  | 0.632916  |
| Cdk8_j10         | 9.18237    | 9.40259   | 0.0341908    | 0.797225  | 0.932581  |
| Pan3_j5          | 2.30205    | 2.26543   | 0            | 1         | 1         |
| Pan3_j9          | 3.14545    | 3.18639   | 0            | 1         | 1         |
| Mtus2            | 0.29459    | 0.258552  | 0            | 1         | 1         |
| Uspl1_j1         | 1.57732    | 2.86705   | 0            | 1         | 1         |
| Uspl1_j2         | 1.33657    | 0.985754  | 0            | 1         | 1         |
| Alox5ap_j4       | 0          | 0.052126  | 1.79769e+308 | 0.189781  | 1         |
| 6330406l15Rik_j3 | 1.12978    | 0.690708  | -0.709901    | 0.0406743 | 0.226309  |
| Fry_j1           | 0          | 0.148751  | 0            | 1         | 1         |
| Fry_j6           | 0.567418   | 0.798082  | 0            | 1         | 1         |
| Fry_j10          | 1.61553    | 1.37531   | 0            | 1         | 1         |
| Brca2_j4         | 0.15303    | 0.177302  | 0.212392     | 0.830414  | 0.945392  |
| Brca2_j5         | 0.217342   | 0.343198  | 0.659069     | 0.20096   | 0.544315  |
| Ankib1_j1        | 3.55547    | 2.66074   | 0            | 1         | 1         |
| Cdk14_j2         | 2.63261    | 0.685152  | 0            | 1         | 1         |
| A330021E22Rik_j9 | 0.498509   | 0.698868  | 0.4874       | 0.164613  | 0.500613  |
| A330021E22Rik_j8 | 0          | 0.620451  | 1.79769e+308 | 9.51E-08  | 5.14E-06  |
| Steap2_j6        | 0.391547   | 0.433165  | 0            | 1         | 1         |
| Gm17019_j3       | 0.0792263  | 0.229177  | 1.53241      | 1         | 1         |
| Gm9758_j1        | 0.0364484  | 0.780559  | 4.42058      | 0.112464  | 0.41729   |
| Gm3510_j1        | 0.0808364  | 0.157455  | 0.961866     | 0.40768   | 0.728185  |
| Cd36_j4          | 0          | 0.125926  | 1.79769e+308 | 0.0122324 | 1         |
| AK046351_j1      | 0          | 0.100408  | 1.79769e+308 | 0.0014797 | 1         |
| Ptpn12_j4        | 1.17921    | 2.31003   | 0            | 1         | 1         |
| Orc5_j4          | 0          | 1.59393   | 1.79769e+308 | 9.47E-06  | 0.0002963 |
| A930003O13Rik_j4 | 0.0371708  | 0.0718405 | 0.950628     | 0.381615  | 1         |
| Srpk2_j1         | 0.553653   | 0.455606  | 0            | 1         | 1         |

|                  |            |           |              |           |           |
|------------------|------------|-----------|--------------|-----------|-----------|
| Fam126a_j4       | 0.0023237  | 0.0663042 | 0            | 1         | 1         |
| Fam126a_j5       | 0.293417   | 0.229025  | 0            | 1         | 1         |
| Atg9b_j2         | 0.932017   | 1.08714   | 0.222113     | 0.404199  | 0.72669   |
| Tmub1_j1         | 0          | 0.358002  | 1.79769e+308 | 0.0091539 | 0.0802424 |
| Wdr86_j1         | 0          | 0.166893  | 1.79769e+308 | 0.0242372 | 0.160803  |
| Crygn_j1         | 0.147069   | 0.187371  | 0.349402     | 0.622762  | 0.852408  |
| Mll3_j6          | 2.3952     | 2.22395   | -0.107021    | 0.536886  | 0.8071    |
| Mll3_j5          | 3.14613    | 3.45661   | 0.13578      | 0.354824  | 0.690914  |
| Mll3_j8          | 0          | 0.0920505 | 1.79769e+308 | 5.09E-05  | 1         |
| Mll3_j9          | 0.0992973  | 0.123226  | 0.311476     | 0.37997   | 1         |
| Tyms_j4          | 0.0301973  | 0.147513  | 2.28835      | 0.167285  | 1         |
| Hadha_j4         | 35.0907    | 37.2923   | 0            | 1         | 1         |
| Slc5a6_j1        | 5.95665    | 5.74373   | -0.0525137   | 0.744833  | 0.910906  |
| Slc5a6_j5        | 0.312408   | 0.524158  | 0.746569     | 0.206269  | 0.550755  |
| Gtf3c2_j4        | 2.81085    | 1.35225   | 0            | 1         | 1         |
| Gtf3c2_j7        | 2.95404    | 2.58894   | 0            | 1         | 1         |
| Gtf3c2_j12       | 6.92265    | 6.2715    | 0            | 1         | 1         |
| Eif2b4_j1        | 15.9405    | 17.8898   | 0            | 1         | 1         |
| Ppm1g_j2         | 0.0583931  | 0.103729  | 0            | 1         | 1         |
| Ppm1g_j1         | 0.149115   | 0.198722  | 0            | 1         | 1         |
| Ift172_j4        | 0.747705   | 0.795915  | 0            | 1         | 1         |
| C330019G07Rik_j1 | 2.78744    | 2.49178   | 0            | 1         | 1         |
| C330019G07Rik_j2 | 0.00141832 | 0.490719  | 0            | 1         | 1         |
| Ctbp1_j1         | 11.3453    | 19.9653   | 0            | 1         | 1         |
| Fam53a_j1        | 1.35882    | 1.63714   | 0.268824     | 0.334238  | 0.675055  |
| Poln_j6          | 0.038885   | 0.580752  | 3.90064      | 0.0124115 | 0.100666  |
| Mxd4_j2          | 0.161369   | 5.8674    | 0            | 1         | 1         |
| Htra3            | 0.265816   | 0.171565  | -0.631675    | 0.402697  | 0.725892  |
| Sh3tc1_j2        | 5.09E-05   | 0.160738  | 11.6243      | 0.925129  | 0.976765  |
| Evc_j2           | 0          | 0.0721407 | 1.79769e+308 | 0.0164454 | 1         |
| Slc2a9_j2        | 0.13907    | 0.162253  | 0.222433     | 0.770288  | 0.921804  |
| Wdr1_j8          | 0.0832263  | 0.219415  | 0            | 1         | 1         |
| Zfp518b_j1       | 0          | 0.197889  | 0            | 1         | 1         |
| XLOC_025828      | 0.258895   | 0.264743  | 0.0322256    | 0.967336  | 0.990716  |
| Rab28_j4         | 11.4047    | 10.1391   | -0.169693    | 0.411329  | 0.730655  |
| Prom1_j6         | 0.166396   | 0.319959  | 0.943265     | 0.0518202 | 0.263999  |
| Tapt1_j1         | 4.09494    | 5.12847   | 0            | 1         | 1         |
| Ldb2_j2          | 1.96374    | 4.84334   | 0            | 1         | 1         |
| Qdpr_j3          | 0          | 0.814251  | 0            | 1         | 1         |
| Kcnp4_j2         | 0          | 2.39098   | 0            | 1         | 1         |
| Ppargc1a_j1      | 1.78916    | 1.5429    | 0            | 1         | 1         |
| Sepsecs_j3       | 0.606393   | 0.985904  | 0            | 1         | 1         |
| Sel1l3_j1        | 6.0437     | 7.55428   | 0            | 1         | 1         |
| Sel1l3_j2        | 0.782327   | 1.55082   | 0            | 1         | 1         |
| Cckar_j4         | 0          | 0.194781  | 0            | 1         | 1         |
| Cckar_j3         | 0.0680706  | 0.122809  | 0            | 1         | 1         |
| Rell1_j1         | 1.38621    | 0.990765  | -0.48453     | 0.137521  | 0.461289  |

|                  |            |           |              |           |           |
|------------------|------------|-----------|--------------|-----------|-----------|
| Rfc1_j7          | 0          | 0.0659714 | 0            | 1         | 1         |
| Ugdh_j3          | 6.85037    | 9.71595   | 0            | 1         | 1         |
| 1110003E01Rik_j1 | 23.5003    | 26.8916   | 0            | 1         | 1         |
| 1110003E01Rik_j2 | 28.5302    | 27.4826   | 0            | 1         | 1         |
| Pds5a_j7         | 1.54196    | 1.50168   | 0            | 1         | 1         |
| Pds5a_j8         | 0.0626239  | 0.273325  | 0            | 1         | 1         |
| Apbb2_j4         | 6.61688    | 6.36486   | 0            | 1         | 1         |
| Kctd8_j5         | 0.117382   | 0.0905687 | -0.374132    | 0.786888  | 1         |
| Kctd8_j6         | 0          | 0.101936  | 1.79769e+308 | 0.0953986 | 1         |
| Gabra2_j5        | 0.128679   | 1.05334   | 0            | 1         | 1         |
| Gabra2_j6        | 0.0940218  | 0.65067   | 0            | 1         | 1         |
| Gabra4_j1        | 0          | 0.0984156 | 1.79769e+308 | 0.0113573 | 1         |
| Nfxl1_j1         | 0.506862   | 0.494728  | -0.0349573   | 0.959087  | 0.988313  |
| Tec_j1           | 0          | 0.538625  | 1.79769e+308 | 1.30E-05  | 0.0003878 |
| Scfd2            | 2.1842     | 1.8348    | -0.251484    | 0.368165  | 0.701587  |
| Kdr_j2           | 0          | 0.0585127 | 1.79769e+308 | 0.01392   | 1         |
| Clock_j1         | 2.0932     | 1.60073   | -0.386981    | 0.0087813 | 0.0777821 |
| AASDH_j4         | 0.735058   | 0.656104  | 0            | 1         | 1         |
| XLOC_025899      | 0          | 0.202035  | 1.79769e+308 | 0.0011727 | 0.0162438 |
| Epha5_j1         | 0.564806   | 0.682317  | 0.272688     | 0.254057  | 0.602373  |
| Epha5_j9         | 0.55451    | 0.995514  | 0.844227     | 0.0033938 | 0.0380125 |
| Cenpc1_j1        | 0.151346   | 0.160373  | 0            | 1         | 1         |
| Uba6_j3          | 5.96301    | 6.76897   | 0            | 1         | 1         |
| Ankrd17_j5       | 0.0277779  | 0.254302  | 0            | 1         | 1         |
| XLOC_025917      | 0.00587156 | 0.139723  | 4.57269      | 0.433456  | 1         |
| Rassf6_j6        | 0          | 0.0759048 | 1.79769e+308 | 0.0663555 | 1         |
| Rchy1_j2         | 0.153013   | 0.125171  | -0.289751    | 0.831932  | 0.945814  |
| G3bp2_j4         | 0.438074   | 4.87259   | 0            | 1         | 1         |
| Ppef2_j3         | 0.0612031  | 0.122716  | 1.00365      | 0.350512  | 1         |
| Nup54_j6         | 0          | 0.305892  | 0            | 1         | 1         |
| Nup54_j8         | 0.0947939  | 0.160155  | 0            | 1         | 1         |
| Ccni_j1          | 7.54109    | 7.04803   | 0            | 1         | 1         |
| Ccni_j2          | 0.54842    | 0.435154  | 0            | 1         | 1         |
| Kat2b-ps         | 1.24074    | 1.04236   | -0.251343    | 0.261903  | 0.611103  |
| Paqr3_j2         | 3.69648    | 3.50993   | -0.0747102   | 0.60888   | 0.84604   |
| Antxr2_j6        | 5.7727     | 7.47993   | 0            | 1         | 1         |
| Prkg2_j1         | 0.161684   | 0.419736  | 1.3763       | 0.005259  | 0.0526505 |
| Hnrpd1_j1        | 1.47451    | 2.18011   | 0.564168     | 0.0040926 | 0.0436312 |
| Sec31a_j1        | 0.0550577  | 0.0921149 | 0            | 1         | 1         |
| Sec31a_j2        | 2.42683    | 4.76955   | 0            | 1         | 1         |
| Lin54_j7         | 0.0449337  | 0.124587  | 0            | 1         | 1         |
| Coq2_j5          | 2.98133    | 9.21459   | 0            | 1         | 1         |
| Helq_j1          | 0.740642   | 1.10441   | 0.576428     | 0.280698  | 0.629224  |
| Helq_j3          | 1.0344     | 1.07647   | 0.0575214    | 0.905597  | 0.969967  |
| Helq             | 0.629983   | 0.517075  | -0.284942    | 0.36302   | 0.697185  |
| Wdfy3_j7         | 25.982     | 24.6132   | -0.0780833   | 0.414619  | 0.732858  |
| Wdfy3_j8         | 1.18819    | 1.00886   | -0.23604     | 0.13295   | 0.453791  |

|             |            |           |               |           |           |
|-------------|------------|-----------|---------------|-----------|-----------|
| Mapk10_j7   | 11.8585    | 7.29306   | 0             | 1         | 1         |
| Mapk10_j6   | 34.3771    | 25.1896   | 0             | 1         | 1         |
| Mapk10_j5   | 9.00003    | 7.60569   | 0             | 1         | 1         |
| Klhl8_j1    | 0.00023258 | 1.21679   | 0             | 1         | 1         |
| Hsd17b11_j4 | 29.6009    | 30.381    | 0.0375281     | 0.723491  | 0.901501  |
| Sparcl1_j2  | 27.8405    | 61.6265   | 0             | 1         | 1         |
| AK030263_j1 | 0.117214   | 0.304954  | 1.37944       | 0.0538103 | 0.270322  |
| Zfp951_j1   | 0.116493   | 0.254527  | 1.12758       | 0.0724333 | 0.323876  |
| Zfp951_j5   | 0.120595   | 0.0954626 | -0.337161     | 0.712188  | 1         |
| AK138287_j1 | 0.0153269  | 0.133546  | 3.1232        | 0.480708  | 1         |
| Zfp644_j8   | 0.00170759 | 1.6471    | 0             | 1         | 1         |
| Zfp644_j10  | 0.373403   | 0.916515  | 0             | 1         | 1         |
| Zfp644_j9   | 0.302441   | 0.279573  | 0             | 1         | 1         |
| Hfm1_j11    | 0.194955   | 0.143276  | -0.444347     | 0.46729   | 0.766646  |
| Hfm1_j18    | 0.057151   | 0.0550748 | -0.0533855    | 0.973092  | 1         |
| Evi5_j6     | 0.145243   | 0.323015  | 0             | 1         | 1         |
| Evi5_j7     | 3.70984    | 2.18146   | 0             | 1         | 1         |
| Mfsd7a_j5   | 0.0964957  | 0.15061   | 0.642278      | 0.292062  | 1         |
| Mfsd7a_j6   | 0          | 0.135818  | 1.79769e+308  | 0.0069692 | 1         |
| Cplx1_j1    | 0          | 0.0673706 | 1.79769e+308  | 0.0354201 | 1         |
| XLOC_025991 | 0.153422   | 0.0927222 | -0.726519     | 0.477896  | 0.77269   |
| XLOC_025991 | 0.0492508  | 0.160056  | 1.70036       | 0.368607  | 0.701882  |
| AK003103    | 0.494588   | 0.557855  | 0.173662      | 0.74454   | 0.910838  |
| Gtpbp6_j1   | 10.5438    | 13.3041   | 0             | 1         | 1         |
| Gtpbp6      | 4.68427    | 5.08425   | 0             | 1         | 1         |
| Fbrsl1_j8   | 0.890111   | 1.20707   | 0.439449      | 0.135217  | 0.457474  |
| Fbrsl1_j9   | 1.31188    | 1.30304   | -0.00974788   | 0.966301  | 0.990343  |
| Ep400_j6    | 0.157639   | 0         | -1.79769e+308 | 3.77E-08  | 2.29E-06  |
| Ulk1_j6     | 0.0926402  | 0.485485  | 0             | 1         | 1         |
| Hscb_j2     | 0.343934   | 0.95747   | 1.4771        | 0.0505753 | 0.260382  |
| Miat_j8     | 33.6694    | 27.717    | 0             | 1         | 1         |
| Miat_j9     | 0          | 0.313871  | 0             | 1         | 1         |
| Asphd2_j6   | 2.07443    | 1.7038    | 0             | 1         | 1         |
| Sez6l_j2    | 0          | 0.963008  | 0             | 1         | 1         |
| Crybb3_j3   | 0          | 0.150151  | 1.79769e+308  | 0.0051809 | 1         |
| Sgsm1_j3    | 0.51738    | 1.00656   | 0             | 1         | 1         |
| Cmklr1_j2   | 0          | 0.0852515 | 1.79769e+308  | 0.0554152 | 1         |
| Cmklr1      | 0.155493   | 0.653541  | 2.07143       | 1.24E-05  | 0.0003725 |
| Tmem119_j1  | 7.39E-06   | 0.110021  | 13.8621       | 0.990931  | 1         |
| Coro1c_j3   | 0.822992   | 1.86262   | 0             | 1         | 1         |
| Svop_j3     | 15.2043    | 16.0854   | 0             | 1         | 1         |
| Alkbh2_j4   | 0.681643   | 0.944074  | 0.469883      | 0.32434   | 0.667432  |
| Alkbh2_j5   | 0.445996   | 0         | -1.79769e+308 | 0.0001146 | 0.0024152 |
| Alkbh2_j2   | 0.30137    | 0.36586   | 0.279757      | 0.675393  | 0.877609  |
| Cabp1_j4    | 107.904    | 85.361    | 0             | 1         | 1         |
| Sirt4_j7    | 1.1937     | 1.21373   | 0.0240133     | 0.949383  | 0.985359  |
| Ccdc64_j1   | 0.117025   | 0.153839  | 0             | 1         | 1         |



|             |           |                       |             |           |           |
|-------------|-----------|-----------------------|-------------|-----------|-----------|
| Ccdc64_j3   | 2.65258   | 3.23181               | 0           | 1         | 1         |
| Prkab1      | 2.2432    | 2.28973               | 0           | 1         | 1         |
| Hspb8_j1    | 50.1364   | 51.8876               | 0           | 1         | 1         |
| Hspb8_j4    | 43.3588   | 48.5786               | 0           | 1         | 1         |
| Suds3_j1    | 9.21463   | 6.45813               | 0           | 1         | 1         |
| Rnft2_j8    | 0.315137  | 1.11675               | 0           | 1         | 1         |
| XLOC_026066 | 0.121426  | 0.121318              | -0.00128911 | 0.998332  | 1         |
| Oas2_j6     | 0.0177212 | 0.0772658             | 2.12435     | 0.216288  | 1         |
| Oas3_j1     | 0.08341   | 0.208182              | 1.31956     | 0.0112109 | 0.0933358 |
| Oas1e_j1    | 0.10263   | 0.267523              | 1.38222     | 0.113757  | 0.419374  |
| Rph3a_j9    | 15.1907   | 17.0087               | 0           | 1         | 1         |
| Ptpn11_j1   | 9.42758   | 9.65117               | 0           | 1         | 1         |
| Trafd1_j4   | 8.26611   | 11.8977               | 0.525408    | 1.91E-05  | 0.0005359 |
| Trafd1_j5   | 2.09317   | 0 -1.79769e+308       |             | 1.51E-27  | 4.86E-25  |
| Erp29_j2    | 0.243395  | 0.79161               | 1.70149     | 0.0304411 | 0.187508  |
| Mapkapk5_j6 | 3.33977   | 4.59341               | 0           | 1         | 1         |
| Aldh2_j2    | 28.1859   | 28.3348               | 0           | 1         | 1         |
| Sh2b3       | 2.1277    | 2.70013               | 0           | 1         | 1         |
| Cux2_j2     | 0.133841  | 0.114173              | -0.229302   | 0.692833  | 1         |
| Cux2_j3     | 0         | 0.106782 1.79769e+308 |             | 0.0008131 | 1         |
| Rad9b_j2    | 0.839883  | 1.00669               | 0.261365    | 0.285481  | 0.63431   |
| Anapc5_j2   | 7.64044   | 7.42327               | 0           | 1         | 1         |
| Anapc5_j8   | 1.10302   | 1.48859               | 0           | 1         | 1         |
| Kdm2b_j5    | 0.196828  | 0.348517              | 0.824296    | 0.185908  | 0.52629   |
| Kdm2b_j6    | 0         | 0.158757 1.79769e+308 |             | 0.0039253 | 0.0423269 |
| Kdm2b_j7    | 0.198731  | 0.244628              | 0.299775    | 0.564232  | 0.823153  |
| Vps33a_j10  | 9.88781   | 12.2392               | 0           | 1         | 1         |
| Zcchc8_j3   | 0.3029    | 1.07768               | 0           | 1         | 1         |
| Zcchc8_j4   | 0         | 0.094381              | 0           | 1         | 1         |
| Gm16001     | 0.0225306 | 0.362289              | 4.00719     | 2.05E-05  | 0.0005646 |
| Sbno1_j1    | 0.642165  | 1.18304               | 0           | 1         | 1         |
| Ccdc92_j6   | 0.394707  | 0.0940198             | 0           | 1         | 1         |
| Ncor2_j7    | 3.46105   | 4.23711               | 0.291873    | 0.10041   | 0.392247  |
| Ncor2_j8    | 0.428723  | 0.624708              | 0.543136    | 0.055609  | 0.275636  |
| Ncor2_j9    | 2.68014   | 2.01263               | -0.413225   | 0.008692  | 0.0771917 |
| Ncor2_j10   | 0.351963  | 0.37744               | 0.100824    | 0.732696  | 0.905691  |
| XLOC_026130 | 0.0638774 | 0.194165              | 1.6039      | 1         | 1         |
| Slc15a4_j5  | 0.272358  | 0                     | 0           | 1         | 1         |
| Slc15a4_j8  | 0.0924376 | 0.58552               | 0           | 1         | 1         |
| Tmem132d_j1 | 0.0519858 | 0.0482962             | -0.10621    | 0.905805  | 1         |
| Rimbp2_j1   | 0.976888  | 0.418843              | 0           | 1         | 1         |
| Stx2_j1     | 10.0135   | 14.7083               | 0           | 1         | 1         |
| Psph        | 7.81863   | 7.62072               | 0           | 1         | 1         |
| Chchd2_j2   | 243.448   | 273.318               | 0.166966    | 0.115144  | 0.42209   |
| Wbscr17_j5  | 0         | 2.37232               | 0           | 1         | 1         |
| Auts2_j5    | 2.91803   | 2.8392                | 0           | 1         | 1         |
| Auts2_j6    | 1.39589   | 1.31137               | 0           | 1         | 1         |

|                  |             |           |              |           |           |
|------------------|-------------|-----------|--------------|-----------|-----------|
| Auts2_j8         | 0.0451348   | 0.404492  | 0            | 1         | 1         |
| Ncf1_j3          | 0.000769178 | 0.432947  | 9.13666      | 0.370837  | 0.703864  |
| Gtf2i_j2         | 16.1258     | 15.2284   | 0            | 1         | 1         |
| Gtf2i_j5         | 0.147407    | 0.717659  | 0            | 1         | 1         |
| Gtf2ird1         | 0.930369    | 1.58171   | 0            | 1         | 1         |
| Clip2_j5         | 0.216876    | 0         | 0            | 1         | 1         |
| Clip2            | 10.6445     | 11.1981   | 0            | 1         | 1         |
| Eif4h_j1         | 0.263419    | 1.73492   | 0            | 1         | 1         |
| Limk1_j4         | 1.20655     | 1.83815   | 0.607367     | 0.0937513 | 0.377256  |
| 2010001M06Rik_j2 | 0           | 0.0925055 | 1.79769e+308 | 0.0305277 | 1         |
| 2010001M06Rik_j1 | 0.734313    | 0.653879  | -0.167372    | 0.589578  | 0.836157  |
| 2010001M06Rik_j3 | 0.0788582   | 0.0578716 | -0.446405    | 0.765776  | 1         |
| Ywhag_j3         | 0           | 1.25671   | 0            | 1         | 1         |
| Orai2_j2         | 10.5367     | 9.59068   | -0.135719    | 0.21121   | 0.555994  |
| Sh2b2            | 0.716364    | 0.536516  | -0.41707     | 0.179011  | 0.518629  |
| Emid2            | 0.0829184   | 0.290519  | 1.80887      | 0.0099998 | 0.0855854 |
| Znhit1_j2        | 27.9205     | 33.3159   | 0            | 1         | 1         |
| Srrt             | 12.7027     | 12.5102   | 0            | 1         | 1         |
| Gnb2             | 2.39683     | 2.45766   | 0.0361595    | 0.829437  | 0.944941  |
| Mospd3           | 1.24177     | 1.13587   | -0.128601    | 0.726673  | 0.90322   |
| Fbxo24_j2        | 0.0886375   | 0.14461   | 0.706175     | 0.500873  | 1         |
| 6430598A04Rik_j2 | 17.6376     | 17.9924   | 0            | 1         | 1         |
| Mepce_j1         | 0.209663    | 1.6051    | 0            | 1         | 1         |
| Pilrb2_j2        | 0.0747635   | 0.099074  | 0.406172     | 0.71623   | 1         |
| Zfp113           | 1.02052     | 0.736913  | -0.469744    | 0.0323464 | 0.195244  |
| Taf6_j1          | 3.85642     | 3.45836   | 0            | 1         | 1         |
| BC037034_j5      | 12.0079     | 13.9489   | 0.216164     | 0.12145   | 0.433976  |
| BC037034_j6      | 15.1565     | 15.5176   | 0.0339719    | 0.758915  | 0.917041  |
| Gpc2             | 0           | 0.225384  | 1.79769e+308 | 0.0016652 | 0.0215578 |
| Pdgfa_j5         | 1.86962     | 1.56804   | 0            | 1         | 1         |
| Adap1_j3         | 26.0292     | 24.3851   | 0            | 1         | 1         |
| Cox19_j1         | 25.3758     | 31.24     | 0.299938     | 0.0423421 | 0.232667  |
| Ints1_j8         | 1.53147     | 1.11843   | 0            | 1         | 1         |
| XLOC_026221      | 0.224406    | 0.102012  | -1.13737     | 0.17778   | 0.517223  |
| Snx8_j1          | 2.24889     | 2.842     | 0            | 1         | 1         |
| Iqce_j4          | 0.0907068   | 0.150097  | 0.726612     | 0.257518  | 1         |
| Card11_j4        | 0.709202    | 0.466945  | -0.602944    | 0.0740056 | 0.327958  |
| Card11_j6        | 0           | 0.0663456 | 1.79769e+308 | 0.0133519 | 1         |
| Tnrc18_j3        | 0.549675    | 0.418533  | 0            | 1         | 1         |
| Tnrc18_j10       | 0.292625    | 0.386542  | 0            | 1         | 1         |
| Fbxl18_j2        | 0.0807649   | 0.15889   | 0            | 1         | 1         |
| Rnf216_j1        | 0.000999572 | 1.11402   | 0            | 1         | 1         |
| Rnf216_j2        | 3.06882     | 0.354446  | 0            | 1         | 1         |
| Rbak_j4          | 0.0316105   | 0.126954  | 2.00583      | 0.0536326 | 1         |
| Rbak_j3          | 0           | 0.0764337 | 1.79769e+308 | 0.0267928 | 1         |
| E130309D02Rik_j1 | 1.15164     | 2.09725   | 0.864809     | 0.0013385 | 0.0180623 |
| Zdhhc4_j6        | 0.229753    | 0.313944  | 0            | 1         | 1         |

|                  |             |           |              |           |           |
|------------------|-------------|-----------|--------------|-----------|-----------|
| Zdhhc4_j7        | 1.25176     | 2.58252   | 0            | 1         | 1         |
| XLOC_026242      | 0           | 0.0589172 | 1.79769e+308 | 0.17192   | 1         |
| Tecpr1_j3        | 5.03391     | 7.153     | 0            | 1         | 1         |
| XLOC_026251      | 0.297457    | 0.320118  | 0.105926     | 0.899655  | 0.96799   |
| XLOC_026251      | 1.92694     | 2.6204    | 0.443477     | 0.161609  | 0.496566  |
| Tmem130_j1       | 0.173948    | 0.167025  | 0            | 1         | 1         |
| Smurf1           | 2.27022     | 2.60042   | 0            | 1         | 1         |
| Smurf1_j4        | 0           | 0.209241  | 0            | 1         | 1         |
| Atp5j2_j1        | 9.85681     | 10.7935   | 0.130967     | 0.60546   | 0.844452  |
| Usp12_j4         | 4.18342     | 7.25131   | 0            | 1         | 1         |
| Flt1_j4          | 0.0841845   | 0.184271  | 1.13021      | 0.0753229 | 0.331324  |
| N4bp2l2_j5       | 0.512933    | 0.361029  | -0.506655    | 0.364744  | 0.698781  |
| Stard13_j4       | 6.5804      | 8.90047   | 0            | 1         | 1         |
| Stard13_j5       | 1.13784     | 1.18647   | 0            | 1         | 1         |
| Cdk6_j1          | 0.0806476   | 0.150697  | 0.901946     | 0.21752   | 1         |
| 1700109H08Rik_j1 | 0.240945    | 0.167488  | -0.524644    | 0.278497  | 0.627428  |
| Akap9_j1         | 2.22165     | 2.10111   | 0            | 1         | 1         |
| Akap9_j3         | 4.9069      | 5.11088   | 0            | 1         | 1         |
| Slc25a40_j1      | 0.0363145   | 0.102009  | 1.49007      | 0.517141  | 1         |
| 4933402N22Rik_j2 | 0.00669164  | 0.0533029 | 2.99378      | 0.432816  | 1         |
| 4933402N22Rik_j1 | 0.0065071   | 0.12908   | 4.3101       | 0.250907  | 1         |
| 4933402N22Rik_j4 | 0.161879    | 0.20587   | 0.346821     | 0.713428  | 0.896209  |
| Gm6465           | 0.253743    | 0.683258  | 1.42907      | 0.0081628 | 0.0737159 |
| Pclo_j4          | 0.000103662 | 0.0625606 | 0            | 1         | 1         |
| Lrrc17_j1        | 0.274094    | 0.19596   | -0.484113    | 0.601686  | 0.842408  |
| Armc10           | 2.62695     | 3.36361   | 0.356619     | 0.0669258 | 0.309209  |
| Rint1_j1         | 2.83374     | 2.44372   | 0            | 1         | 1         |
| Slc4a2_j2        | 4.86674     | 4.80999   | 0            | 1         | 1         |
| Agap3_j5         | 0           | 0.773982  | 0            | 1         | 1         |
| 2010209O12Rik_j1 | 1.85619     | 2.30237   | 0.310771     | 0.0168135 | 0.124799  |
| Actr3b_j2        | 1.55106     | 0.365659  | 0            | 1         | 1         |
| Gm7361_j1        | 0.0765187   | 0.117382  | 0.617325     | 0.457185  | 1         |
| Gm7361_j7        | 0.0824602   | 0.206162  | 1.32201      | 0.0809537 | 0.346426  |
| Dpp6_j4          | 3.83768     | 3.45708   | -0.150679    | 0.570679  | 0.826452  |
| Dpp6_j7          | 5.57526     | 2.19092   | 0            | 1         | 1         |
| Htr5a_j2         | 9.86E-05    | 0.264056  | 11.3868      | 0.799254  | 0.933125  |
| Rbm33_j8         | 0.938752    | 1.64728   | 0            | 1         | 1         |
| Nom1_j1          | 3.98626     | 3.84067   | -0.0536782   | 0.751128  | 0.913741  |
| Dnajb6_j2        | 0.593456    | 0.544713  | -0.123645    | 0.900347  | 0.968327  |
| Agbl5_j1         | 0.787833    | 0.977297  | 0.310908     | 0.370311  | 0.703609  |
| Cad_j3           | 1.76202     | 1.80119   | 0            | 1         | 1         |
| Snx17_j4         | 16.6662     | 18.5893   | 0            | 1         | 1         |
| Slc4a1ap_j3      | 1.88644     | 1.47695   | 0            | 1         | 1         |
| Ppp1cb_j2        | 0.135373    | 0.092939  | 0            | 1         | 1         |
| Depdc5_j1        | 0.480213    | 0.493759  | 0.0401316    | 0.904618  | 0.969648  |
| Depdc5_j3        | 0.335587    | 0.484045  | 0.528457     | 0.13414   | 0.455891  |
| XLOC_025181      | 0.0867847   | 0.0620476 | -0.484065    | 0.713845  | 1         |

|                  |           |           |              |           |           |
|------------------|-----------|-----------|--------------|-----------|-----------|
| Ywhah_j4         | 2.24386   | 2.04273   | 0            | 1         | 1         |
| 4933407H18Rik    | 0         | 0.140565  | 1.79769e+308 | 2.45E-05  | 1         |
| Fgfr3            | 0.121846  | 0.0792941 | -0.619768    | 0.296268  | 1         |
| Whsc1_j5         | 0.20283   | 0.372066  | 0            | 1         | 1         |
| XLOC_025191      | 0.505385  | 0.440764  | 0            | 1         | 1         |
| XLOC_025191      | 0.0597719 | 0.0315158 | 0            | 1         | 1         |
| XLOC_025191      | 0.103837  | 0.113562  | 0            | 1         | 1         |
| XLOC_025191      | 0.210544  | 0.189861  | 0            | 1         | 1         |
| XLOC_025191      | 0.593532  | 0.433826  | 0            | 1         | 1         |
| Rnf4_j1          | 0.467707  | 0.882866  | 0.916589     | 0.0122279 | 0.0995614 |
| Fam193a_j4       | 6.25117   | 7.70798   | 0.302226     | 0.0339122 | 0.201623  |
| Sh3bp2           | 0         | 0.302344  | 1.79769e+308 | 0.0001164 | 0.0024409 |
| Add1_j1          | 0.232585  | 0.158834  | 0            | 1         | 1         |
| Add1_j7          | 12.3314   | 14.3337   | 0            | 1         | 1         |
| Grk4_j1          | 0.0366884 | 0.272239  | 2.89148      | 0.121919  | 0.434855  |
| Grk4_j6          | 0.260065  | 0.33503   | 0.365419     | 0.507169  | 0.789555  |
| Rgs12_j3         | 2.45555   | 3.27582   | 0            | 1         | 1         |
| XLOC_025200      | 0.0718339 | 0.0763152 | 0.0873056    | 0.935502  | 1         |
| Afap1_j4         | 0.183256  | 0.304191  | 0            | 1         | 1         |
| Afap1_j5         | 0.133965  | 0.411317  | 0            | 1         | 1         |
| Jakmip1_j2       | 0         | 1.24626   | 1.79769e+308 | 4.46E-09  | 3.34E-07  |
| Crmp1_j3         | 24.8333   | 35.7997   | 0            | 1         | 1         |
| Evc2_j1          | 0         | 0.0476551 | 1.79769e+308 | 0.0444839 | 1         |
| Evc2_j5          | 0         | 0.10155   | 1.79769e+308 | 0.0839107 | 1         |
| Lyar_j2          | 0.384704  | 0.296855  | -0.373988    | 0.541101  | 0.809122  |
| Cpeb2_j2         | 0.130722  | 0.0817394 | 0            | 1         | 1         |
| C1qtnf7_j2       | 0         | 0.105559  | 1.79769e+308 | 0.0069045 | 1         |
| Cc2d2a_j4        | 0         | 0.0698537 | 0            | 1         | 1         |
| Cd38_j1          | 0         | 0.066846  | 1.79769e+308 | 0.0913037 | 1         |
| XLOC_025235      | 0.144979  | 0.161969  | 0.159868     | 0.861215  | 0.956135  |
| Slit2_j5         | 0.0361448 | 0.147867  | 0            | 1         | 1         |
| AK017706_j2      | 0.102551  | 0.180377  | 0            | 1         | 1         |
| 9230114K14Rik_j2 | 0.227397  | 0.094489  | -1.26699     | 0.273212  | 0.622295  |
| 9230114K14Rik_j3 | 0.0411796 | 0.110404  | 1.42279      | 0.319072  | 1         |
| Tbc1d19_j3       | 16.3435   | 16.9255   | 0            | 1         | 1         |
| Tbc1d19_j4       | 6.63651   | 6.75544   | 0            | 1         | 1         |
| Tbc1d19_j6       | 13.991    | 16.211    | 0            | 1         | 1         |
| Tbc1d1_j3        | 0         | 0.222066  | 0            | 1         | 1         |
| Tbc1d1_j5        | 0.192629  | 0.466486  | 0            | 1         | 1         |
| Klh5             | 2.2188    | 1.52101   | 0            | 1         | 1         |
| Wdr19_j4         | 0         | 0.053203  | 1.79769e+308 | 0.0239705 | 1         |
| N4bp2_j3         | 0.0169937 | 0.0869514 | 2.35521      | 0.19873   | 1         |
| Rhoh_j1          | 0         | 0.125273  | 1.79769e+308 | 0.0303167 | 1         |
| Nsun7_j2         | 0.0146402 | 0.0868439 | 2.56849      | 0.255676  | 1         |
| Limch1_j2        | 0         | 0.282308  | 0            | 1         | 1         |
| Tmem33_j4        | 16.3891   | 16.0227   | -0.0326214   | 0.807491  | 0.936551  |
| XLOC_025277      | 0.0802753 | 0.0415806 | -0.949046    | 0.392734  | 1         |

|                  |            |           |              |           |           |
|------------------|------------|-----------|--------------|-----------|-----------|
| Slc30a9_j3       | 37.5811    | 33.116    | 0            | 1         | 1         |
| Slc30a9_j5       | 23.639     | 26.724    | 0            | 1         | 1         |
| XLOC_025279      | 0.0918295  | 0.160937  | 0.809464     | 0.154742  | 0.487949  |
| Gabrb1_j2        | 0.0825057  | 0.0994802 | 0.269914     | 0.798663  | 1         |
| Atp10d_j5        | 0.0295131  | 0.119843  | 2.02172      | 0.0245992 | 1         |
| Srd5a3_j2        | 0.332096   | 0.118293  | -1.48924     | 0.345358  | 0.684733  |
| Exoc1_j3         | 0          | 0.172965  | 0            | 1         | 1         |
| Cep135_j6        | 0.106091   | 0.162479  | 0.614958     | 0.336151  | 0.67662   |
| Cep135_j10       | 0.407712   | 0.690735  | 0.760582     | 0.038755  | 0.219363  |
| Cep135_j12       | 0.0242209  | 0.0784033 | 1.69466      | 0.285681  | 1         |
| C530008M17Rik_j8 | 0          | 0.222678  | 0            | 1         | 1         |
| Paics_j4         | 0.111335   | 2.61718   | 0            | 1         | 1         |
| Srp72_j1         | 0          | 2.67454   | 1.79769e+308 | 1.88E-19  | 5.20E-17  |
| Polr2b_j2        | 15.1531    | 14.29     | -0.0846032   | 0.3874    | 0.71522   |
| Lphn3_j6         | 0.447274   | 0.407443  | -0.134561    | 0.576513  | 0.829044  |
| Lphn3_j5         | 0.103124   | 0.0219194 | -2.2341      | 0.0253725 | 1         |
| Ythdc1_j1        | 1.00982    | 1.19531   | 0.24329      | 0.337277  | 0.677823  |
| Ythdc1_j7        | 0.636749   | 0.590892  | -0.107831    | 0.770409  | 0.921846  |
| Rufy3_j5         | 25.8046    | 45.9644   | 0            | 1         | 1         |
| Rufy3_j6         | 13.8395    | 7.67394   | 0            | 1         | 1         |
| Mobkl1a_j1       | 0.499025   | 0.660634  | 0.40474      | 0.141227  | 0.467373  |
| Mthfd2l_j5       | 0.00940828 | 0.293369  | 4.96264      | 0.111884  | 0.416247  |
| Parm1_j2         | 0.0761018  | 0.0229419 | -1.72995     | 0.499456  | 1         |
| Art3_j1          | 4.61899    | 5.27613   | 0            | 1         | 1         |
| Shroom3_j4       | 0          | 0.354323  | 1.79769e+308 | 7.79E-08  | 4.34E-06  |
| Fras1_j6         | 0.0410311  | 0.145153  | 1.82279      | 0.0082084 | 1         |
| Bmp2k_j1         | 0.0541235  | 0.10377   | 0.939059     | 0.537891  | 1         |
| 1700007G11Rik_j2 | 0.00599779 | 0.227417  | 5.24477      | 0.349676  | 0.687349  |
| Mrps18c_j2       | 0.0550335  | 0.0786735 | 0            | 1         | 1         |
| Cds1_j6          | 0.218743   | 1.53079   | 0            | 1         | 1         |
| Ptpn13_j2        | 0.09097    | 0.0540077 | -0.752225    | 0.274929  | 1         |
| Pkd2_j6          | 0          | 0.116419  | 0            | 1         | 1         |
| Lrrc8d_j3        | 0          | 0.244318  | 0            | 1         | 1         |
| Zfp326_j2        | 0          | 0.382803  | 0            | 1         | 1         |
| XLOC_025387      | 0.805533   | 1.62918   | 0            | 1         | 1         |
| Rpl5_j1          | 0.287765   | 0.367148  | 0            | 1         | 1         |
| XLOC_025396      | 0.0814347  | 0.123544  | 0            | 1         | 1         |
| AK141638_j4      | 1.12214    | 1.90354   | 0            | 1         | 1         |
| AK141638_j3      | 1.55809    | 1.89528   | 0            | 1         | 1         |
| Pde6b_j3         | 0.119759   | 0.150831  | 0.3328       | 0.745002  | 1         |
| Fgfrl1_j1        | 1.3564     | 1.56057   | 0            | 1         | 1         |
| XLOC_025402      | 0.219289   | 0.332159  | 0.599042     | 0.125207  | 0.440797  |
| AK142681_j1      | 3.22586    | 2.07247   | 0            | 1         | 1         |
| Ankle2_j1        | 2.31319    | 3.00282   | 0            | 1         | 1         |
| Ddx51_j1         | 0.126014   | 0.404912  | 1.68403      | 5.38E-05  | 0.0012688 |
| Chek2_j6         | 0.0491901  | 0.112351  | 1.19157      | 0.195882  | 1         |
| Iscu_j7          | 2.63353    | 2.40693   | -0.1298      | 0.588098  | 0.835347  |

|              |           |            |              |           |           |
|--------------|-----------|------------|--------------|-----------|-----------|
| Iscu_j9      | 1.08656   | 1.11862    | 0.0419408    | 0.886811  | 0.964085  |
| Acacb_j8     | 0.114452  | 0.0641676  | -0.83483     | 0.237666  | 1         |
| Acacb_j11    | 0.20221   | 0.258883   | 0.356447     | 0.538792  | 0.808163  |
| Mvk_j2       | 0         | 0.0499982  | 0            | 1         | 1         |
| Ankrd13a_j1  | 2.16687   | 3.51225    | 0.696785     | 0.001186  | 0.0164001 |
| XLOC_025432  | 0.0797923 | 0.0964361  | 0            | 1         | 1         |
| XLOC_025434  | 0.0592758 | 0.21756    | 1.8759       | 0.156291  | 0.4898    |
| Oasl1        | 0.447548  | 0.900452   | 1.00861      | 0.0037026 | 0.0406356 |
| Pxn_j3       | 1.41145   | 1.25272    | 0            | 1         | 1         |
| Rplp0_j1     | 0         | 0.0791281  | 0            | 1         | 1         |
| Rplp0_j4     | 27.1506   | 31.5368    | 0            | 1         | 1         |
| Gcn1l1_j5    | 0.188564  | 0.128247   | 0            | 1         | 1         |
| Rab35_j2     | 19.4223   | 24.6743    | 0.345299     | 0.0285676 | 0.179787  |
| Cit_j11      | 0.0605653 | 0.281041   | 2.21422      | 1.93E-05  | 0.0005401 |
| Cit_j13      | 1.26454   | 1.37641    | 0.122291     | 0.569887  | 0.826046  |
| Wsb2_j2      | 20.8699   | 25.9267    | 0            | 1         | 1         |
| Ksr2_j3      | 0         | 0.0589392  | 1.79769e+308 | 0.0008814 | 1         |
| Med13l_j3    | 0.175978  | 0.101763   | 0            | 1         | 1         |
| Rbm19_j1     | 0.874219  | 1.38064    | 0.659275     | 0.0380089 | 0.216574  |
| Ddx54_j2     | 1.13296   | 1.12676    | -0.00790802  | 0.969432  | 0.991425  |
| Ddx54_j4     | 19.9612   | 25.3601    | 0.345358     | 0.0045681 | 0.0474527 |
| Gm15800_j1   | 0.203077  | 0.00153767 | -7.04514     | 0.0044969 | 0.0469026 |
| Atxn2_j4     | 7.57071   | 7.36351    | 0            | 1         | 1         |
| Atxn2_j3     | 7.65599   | 6.71232    | 0            | 1         | 1         |
| Fam109a_j2   | 0.0429848 | 0.305182   | 0            | 1         | 1         |
| Ppp1cc_j2    | 1.71146   | 1.74401    | 0.0271871    | 0.867779  | 0.958158  |
| Arpc3_j1     | 42.7164   | 56.3107    | 0            | 1         | 1         |
| XLOC_025488  | 0.015472  | 0.0852057  | 2.46129      | 0.117479  | 1         |
| P2rx7_j1     | 0         | 0.339509   | 0            | 1         | 1         |
| P2rx4        | 2.81405   | 2.70567    | -0.0566625   | 0.83988   | 0.949215  |
| mKIAA1076_j1 | 0         | 0.369223   | 0            | 1         | 1         |
| mKIAA1076    | 3.96864   | 3.59348    | 0            | 1         | 1         |
| Bcl7a_j1     | 0.474424  | 0.49874    | 0.0721121    | 0.860559  | 0.955855  |
| Ccdc62_j7    | 0.0492844 | 0.0518583  | 0.0734445    | 0.96426   | 1         |
| Hip1r_j6     | 0.651595  | 0.825524   | 0.341334     | 0.101969  | 0.395671  |
| Ogfod2_j1    | 9.70497   | 9.75607    | 0.00757525   | 0.967369  | 0.99073   |
| Arl6ip4_j1   | 0.420151  | 0.483224   | 0.201782     | 0.723139  | 0.901433  |
| Setd8_j2     | 8.11595   | 8.28484    | 0            | 1         | 1         |
| Snrnp35_j1   | 0.757395  | 0.845084   | 0            | 1         | 1         |
| Dnahc10_j9   | 0         | 0.0941586  | 1.79769e+308 | 0.0553032 | 1         |
| XLOC_025523  | 0.138458  | 0.131401   | 0            | 1         | 1         |
| Aacs_j4      | 23.6884   | 29.4042    | 0            | 1         | 1         |
| XLOC_025526  | 0.844353  | 1.49711    | 0.826262     | 0.0071619 | 0.067024  |
| XLOC_025526  | 0.0225007 | 0.142532   | 2.66324      | 0.0003328 | 1         |
| XLOC_025526  | 0.050089  | 0.0252844  | -0.986244    | 0.291609  | 1         |
| Glt1d1_j1    | 0.132478  | 0.723769   | 0            | 1         | 1         |
| Ran_j1       | 30.7171   | 36.0884    | 0            | 1         | 1         |

|                  |           |           |              |           |          |
|------------------|-----------|-----------|--------------|-----------|----------|
| Ran_j5           | 43.2665   | 48.5105   | 0            | 1         | 1        |
| Gpr133_j1        | 0.0740272 | 0.137946  | 0.897973     | 0.209665  | 1        |
| Mrps17           | 14.0206   | 13.7107   | -0.0322409   | 0.790282  | 0.930148 |
| Cct6a_j4         | 2.68917   | 0.506417  | -2.40876     | 5.70E-10  | 4.96E-08 |
| Crcp_j2          | 0.157202  | 0.0567609 | -1.46965     | 0.562714  | 0.822297 |
| 0610007L01Rik    | 12.0018   | 11.0688   | -0.11675     | 0.294219  | 0.641019 |
| Caln1_j6         | 0.0245591 | 0.475009  | 0            | 1         | 1        |
| Rfc2_j1          | 3.24424   | 3.77982   | 0.220438     | 0.432469  | 0.744252 |
| Abhd11           | 13.5771   | 14.1371   | 0.0583183    | 0.716433  | 0.897624 |
| Baz1b_j2         | 4.78612   | 5.24812   | 0            | 1         | 1        |
| 2900083111Rik_j9 | 0.934447  | 0.74463   | -0.327589    | 0.233977  | 0.581404 |
| XLOC_025574      | 0.0932913 | 0.0238939 | -1.9651      | 0.385802  | 1        |
| Cldn15_j1        | 0.0699183 | 0.16236   | 1.21545      | 0.184858  | 0.525128 |
| Plod3_j1         | 8.28747   | 10.5164   | 0            | 1         | 1        |
| Vgf_j3           | 22.5986   | 36.6122   | 0.696095     | 9.09E-10  | 7.66E-08 |
| Ache_j1          | 0.159473  | 0.134752  | 0            | 1         | 1        |
| Ephb4_j1         | 0         | 0.0877565 | 1.79769e+308 | 0.009887  | 1        |
| Trfr2_j6         | 0.229017  | 0.242027  | 0.0797108    | 0.887494  | 0.964402 |
| Lrch4_j4         | 0.334034  | 0.497878  | 0            | 1         | 1        |
| XLOC_025595      | 0         | 0.0478015 | 0            | 1         | 1        |
| Cops6_j1         | 0         | 0.161126  | 1.79769e+308 | 0.0563391 | 0.277728 |
| BC055004_j5      | 0.180322  | 0.347647  | 0.947051     | 0.266312  | 0.615495 |
| 0910001L09Rik_j3 | 0.219358  | 0.269183  | 0.295301     | 0.452489  | 0.757605 |
| Zfp157_j4        | 0.0536893 | 0.101488  | 0            | 1         | 1        |
| Fam20c_j1        | 10.9216   | 9.33521   | -0.226435    | 0.0691691 | 0.315322 |
| Sun1_j1          | 0.461699  | 0.575244  | 0.317223     | 0.38366   | 0.713176 |
| Sun1_j2          | 0.741909  | 1.06001   | 0.514761     | 0.059562  | 0.287129 |
| XLOC_025613      | 0.126269  | 0.115534  | -0.128182    | 0.83298   | 1        |
| XLOC_025616      | 0         | 0.0925385 | 1.79769e+308 | 0.0094233 | 1        |
| Amz1_j1          | 0.0611592 | 0.167313  | 1.45191      | 0.101232  | 0.394004 |
| Amz1_j4          | 0.0131255 | 0.0913089 | 2.79839      | 0.1243    | 1        |
| C330006K01Rik_j2 | 4.49452   | 5.26854   | 0            | 1         | 1        |
| Zfp12_j1         | 2.49242   | 2.34996   | -0.0849145   | 0.621035  | 0.851431 |
| 0610040B10Rik_j2 | 0.0663538 | 0.166517  | 1.32742      | 0.434118  | 0.745231 |
| Rsph10b2_j2      | 0         | 0.0617083 | 1.79769e+308 | 0.0566844 | 1        |
| Rsph10b2_j8      | 0.070128  | 0.0845499 | 0.269813     | 0.854516  | 1        |
| Lmtk2_j3         | 1.74087   | 1.91004   | 0            | 1         | 1        |
| XLOC_025641      | 0.0898157 | 0.093278  | 0.0545685    | 0.947862  | 1        |
| Trrap_j14        | 0         | 0.0572945 | 1.79769e+308 | 0.0276859 | 1        |
| Cdk8_j3          | 0         | 0.0744375 | 1.79769e+308 | 0.194658  | 1        |
| Cdk8_j11         | 0.110015  | 0.104332  | -0.076521    | 0.932742  | 1        |
| XLOC_025661      | 0.0892776 | 0.0727145 | -0.296056    | 0.723962  | 1        |
| Pan3_j1          | 0.364594  | 0.360064  | 0            | 1         | 1        |
| Pan3_j7          | 1.20408   | 1.8854    | 0            | 1         | 1        |
| AK009869_j1      | 0         | 0.0616694 | 1.79769e+308 | 0.0824815 | 1        |
| AK009869_j4      | 0.0641128 | 0.102701  | 0.679771     | 0.428     | 1        |
| AK138849_j4      | 0.132297  | 0.269555  | 1.0268       | 0.108149  | 0.408811 |

|                  |             |           |              |           |          |
|------------------|-------------|-----------|--------------|-----------|----------|
| 633040615Rik_j2  | 1.10176     | 1.07271   | -0.0385515   | 0.892875  | 0.966157 |
| Brca2_j7         | 0.438877    | 0.407721  | -0.106236    | 0.565593  | 0.823916 |
| Pds5b_j5         | 0.0491203   | 0.013729  | 0            | 1         | 1        |
| Cdk14_j3         | 0           | 0.170526  | 0            | 1         | 1        |
| Cdk14_j5         | 0.00431617  | 0.944602  | 0            | 1         | 1        |
| A330021E22Rik_j1 | 1.20016     | 1.0408    | -0.205538    | 0.408707  | 0.729001 |
| A330021E22Rik    | 1.22825     | 1.16384   | -0.0777173   | 0.759079  | 0.917041 |
| Steap2_j5        | 0.47475     | 0.504263  | 0            | 1         | 1        |
| Rundc3b_j2       | 0.14815     | 0.103715  | 0            | 1         | 1        |
| Crot_j2          | 0.0701246   | 0.145614  | 0            | 1         | 1        |
| Dmtf1_j1         | 5.13545     | 5.72813   | 0            | 1         | 1        |
| Dmtf1_j2         | 0.673612    | 1.06124   | 0            | 1         | 1        |
| Dmtf1_j5         | 0.324904    | 0.703762  | 0            | 1         | 1        |
| XLOC_025705      | 17.0635     | 18.708    | 0.132742     | 0.44739   | 0.754122 |
| Speer4e_j1       | 0.0298541   | 0.267937  | 3.1659       | 0.107294  | 0.407129 |
| Gm17019_j2       | 0.0611788   | 0.382686  | 2.64506      | 0.059407  | 0.286574 |
| AK046351_j4      | 0.558281    | 0.320964  | -0.798581    | 0.0598783 | 0.288093 |
| AK017143_j1      | 0.0681842   | 0.158351  | 1.21561      | 0.143663  | 0.470722 |
| Pus7_j2          | 0.908686    | 1.31995   | 0.538629     | 0.0807534 | 0.345924 |
| Fam126a_j2       | 0.389759    | 0.363948  | 0            | 1         | 1        |
| Fam126a_j3       | 0.000215424 | 0.131251  | 0            | 1         | 1        |
| XLOC_025735      | 3.12969     | 3.55258   | 0.182848     | 0.554433  | 0.817513 |
| Atg9b_j1         | 0           | 0.052353  | 1.79769e+308 | 0.0676492 | 1        |
| Cdk5_j1          | 1.82173     | 1.97131   | 0.113845     | 0.378372  | 0.710035 |
| Fastk            | 22.2429     | 22.7878   | 0            | 1         | 1        |
| Smarcd3_j3       | 2.25838     | 2.3169    | 0.0369071    | 0.833464  | 0.946358 |
| Prkag2_j8        | 0.166294    | 0.324783  | 0            | 1         | 1        |
| Prkag2_j9        | 2.44328     | 2.42872   | 0            | 1         | 1        |
| Mll3_j1          | 0.141185    | 0.218556  | 0.630414     | 0.0473798 | 0.250002 |
| Gm10220_j1       | 0.0701864   | 0.379285  | 2.43402      | 0.0192857 | 0.137474 |
| Paxip1_j1        | 0.453985    | 0.328181  | 0            | 1         | 1        |
| Ost4_j1          | 1.14014     | 1.10268   | -0.0482024   | 0.79042   | 0.930178 |
| Ucn_j1           | 0           | 0.523152  | 1.79769e+308 | 0.0191597 | 0.136877 |
| Gtf3c2_j3        | 1.33543     | 1.16389   | 0            | 1         | 1        |
| Ppm1g_j7         | 1.51274     | 1.83168   | 0            | 1         | 1        |
| Ppm1g_j6         | 0.319626    | 0.402007  | 0            | 1         | 1        |
| Ift172_j8        | 6.27914     | 5.86493   | 0            | 1         | 1        |
| AK036733         | 0           | 0.0486793 | 1.79769e+308 | 0.117917  | 1        |
| Pisd_j1          | 0.0397807   | 0.351554  | 0            | 1         | 1        |
| Ctbp1            | 4.97433     | 0.985362  | 0            | 1         | 1        |
| Whsc2_j2         | 0.0591102   | 0.11054   | 0            | 1         | 1        |
| Zfyve28_j3       | 0           | 0.397299  | 0            | 1         | 1        |
| Zfyve28_j5       | 0.220395    | 0.236061  | 0            | 1         | 1        |
| 2310079F23Rik_j3 | 0.0870455   | 0.130654  | 0.585912     | 0.226931  | 1        |
| Sh3tc1_j1        | 0.0734279   | 0.107111  | 0.544703     | 0.636794  | 1        |
| Sorcs2_j2        | 0.136159    | 0.941948  | 0            | 1         | 1        |
| AK144870_j4      | 0           | 0.0906851 | 1.79769e+308 | 0.0693289 | 1        |



|              |             |           |              |           |           |
|--------------|-------------|-----------|--------------|-----------|-----------|
| D5Ert579e_j3 | 3.50401     | 3.10813   | -0.172963    | 0.524743  | 0.800294  |
| Zbtb49_j4    | 0           | 0.0475729 | 1.79769e+308 | 0.0316036 | 1         |
| Zbtb49_j3    | 0.000107568 | 0.407093  | 11.8859      | 1         | 1         |
| Slc2a9_j1    | 0           | 0.107198  | 1.79769e+308 | 0.0252611 | 1         |
| Slc2a9_j3    | 0.178401    | 0.284797  | 0.674812     | 0.589887  | 0.836402  |
| Zfp518b_j3   | 0           | 0.465482  | 0            | 1         | 1         |
| XLOC_025828  | 0.00811969  | 0.120798  | 3.89503      | 0.135136  | 1         |
| Bod1l_j4     | 5.25727     | 5.55046   | 0.0782934    | 0.650109  | 0.865646  |
| Prom1_j3     | 2.09764     | 2.08378   | -0.00956967  | 0.977608  | 0.993549  |
| Prom1_j8     | 0.370996    | 0.389782  | 0.0712649    | 0.876747  | 0.960797  |
| Fam184b_j3   | 0.477383    | 0.732603  | 0.617886     | 0.123106  | 0.436787  |
| Lcorl_j1     | 0.359954    | 0.251353  | 0            | 1         | 1         |
| Kcnp4        | 57.4953     | 46.7988   | 0            | 1         | 1         |
| Sel1l3_j4    | 1.06249     | 2.09793   | 0            | 1         | 1         |
| Sel1l3_j5    | 0.855007    | 2.48717   | 0            | 1         | 1         |
| Arap2_j1     | 0.0544618   | 0.204565  | 0            | 1         | 1         |
| Rfc1_j4      | 0           | 0.123199  | 0            | 1         | 1         |
| Rpl9_j2      | 0.196094    | 0.150194  | 0            | 1         | 1         |
| Ugdh_j1      | 0           | 0.0477762 | 0            | 1         | 1         |
| Appb2_j3     | 1.93855     | 2.00916   | 0            | 1         | 1         |
| Atp8a1_j3    | 0.543852    | 0.724591  | 0            | 1         | 1         |
| Kctd8_j1     | 0           | 2.36825   | 1.79769e+308 | 8.41E-10  | 7.16E-08  |
| Gnpda2_j2    | 8.62796     | 15.1693   | 0            | 1         | 1         |
| Gabrg1_j2    | 3.07098     | 5.93415   | 0            | 1         | 1         |
| Gabrg1_j1    | 2.66367     | 3.67047   | 0            | 1         | 1         |
| Gabrg1_j3    | 5.60504     | 9.09282   | 0            | 1         | 1         |
| Gabra4_j3    | 0.0698642   | 0.0694007 | -0.00960338  | 0.99349   | 1         |
| Commd8_j1    | 0.419164    | 0.497912  | 0.248376     | 0.308017  | 0.653037  |
| Nfxl1_j4     | 0.357716    | 0.637366  | 0.833309     | 0.099223  | 0.389817  |
| Tec          | 0.154193    | 0.430661  | 1.48181      | 0.0116067 | 0.0956833 |
| Fryl_j11     | 0.273513    | 0.503694  | 0            | 1         | 1         |
| Aasdh        | 0.521715    | 0.606011  | 0            | 1         | 1         |
| Tmprss11c_j2 | 0.0882027   | 0.102308  | 0.214027     | 0.792932  | 1         |
| Tmprss11f_j2 | 0.0440062   | 0.122443  | 1.47633      | 0.282093  | 1         |
| Ankrd17_j6   | 0.225358    | 0.389797  | 0            | 1         | 1         |
| Rassf6_j1    | 0.164358    | 0.0662211 | -1.31148     | 0.268148  | 0.616844  |
| Cdkl2_j4     | 0.293446    | 0.110283  | 0            | 1         | 1         |
| G3bp2_j5     | 42.3176     | 35.224    | 0            | 1         | 1         |
| Nup54_j2     | 1.13361     | 1.75627   | 0            | 1         | 1         |
| Nup54_j3     | 2.98951     | 3.13768   | 0            | 1         | 1         |
| Scarb2_j3    | 0           | 0.191867  | 0            | 1         | 1         |
| Ccdc158_j1   | 0.0821611   | 0.127625  | 0.635386     | 0.502234  | 1         |
| Ccni_j3      | 0.0546419   | 0.094482  | 0            | 1         | 1         |
| Antxr2_j9    | 4.67221     | 8.86858   | 0            | 1         | 1         |
| Prkg2        | 0.225257    | 1.21951   | 2.43665      | 3.12E-08  | 1.95E-06  |
| Rasgef1b_j3  | 0.345186    | 0.426702  | 0.305853     | 0.57394   | 0.827829  |
| Hnrnpd_j1    | 3.28726     | 2.74418   | -0.260509    | 0.0470691 | 0.24874   |

|             |           |           |              |           |           |
|-------------|-----------|-----------|--------------|-----------|-----------|
| Sec31a_j7   | 10.738    | 16.7858   | 0            | 1         | 1         |
| Lin54_j3    | 0.0581065 | 0.059842  | 0            | 1         | 1         |
| Lin54_j2    | 0.375223  | 0.58641   | 0            | 1         | 1         |
| Coq2_j6     | 0         | 0.0677198 | 0            | 1         | 1         |
| Hpse_j1     | 0         | 0.0579641 | 1.79769e+308 | 0.0837027 | 1         |
| Nkx6-1      | 0.0852548 | 0.252667  | 1.56738      | 0.0197982 | 0.139859  |
| Wdfy3_j3    | 6.65569   | 6.13708   | -0.117036    | 0.267482  | 0.616277  |
| Mapk10_j2   | 6.4791    | 6.65062   | 0            | 1         | 1         |
| Zfp951_j4   | 0.0819678 | 0.0346633 | -1.24165     | 0.402825  | 1         |
| Zfp951_j6   | 0.354588  | 0.497984  | 0.489954     | 0.247532  | 0.595013  |
| Gbp9_j3     | 0.333039  | 0.30351   | -0.133944    | 0.82819   | 0.944579  |
| Gbp4_j3     | 0.548052  | 0.429698  | -0.350988    | 0.214199  | 0.559543  |
| Zfp644_j6   | 0.742492  | 0.104935  | 0            | 1         | 1         |
| Hfm1_j12    | 0         | 0.0858601 | 1.79769e+308 | 0.0267763 | 1         |
| Hfm1_j13    | 0.0218788 | 0.0817445 | 1.90159      | 0.194778  | 1         |
| Tgfbr3_j1   | 3.18977   | 4.12517   | 0            | 1         | 1         |
| Evi5_j5     | 0         | 0.171121  | 0            | 1         | 1         |
| Evi5_j9     | 0         | 0.0747901 | 0            | 1         | 1         |
| Fam69a_j1   | 1.33854   | 1.27771   | 0            | 1         | 1         |
| Gak_j6      | 17.2561   | 18.2872   | 0            | 1         | 1         |
| Slc26a1_j1  | 0.0733723 | 0.192363  | 0            | 1         | 1         |
| Crlf2_j5    | 0.146198  | 0.0966714 | -0.596768    | 0.477041  | 0.772559  |
| Crlf2_j8    | 0.327989  | 0.665445  | 1.02067      | 0.0233727 | 0.156748  |
| Crlf2_j10   | 0         | 0.735034  | 1.79769e+308 | 0.0063296 | 0.061076  |
| AK053084_j1 | 0.320821  | 0.319856  | -0.00434472  | 0.988836  | 0.996606  |
| Pgam5       | 7.27612   | 7.34826   | 0            | 1         | 1         |
| P2rx2_j3    | 0         | 0.141363  | 1.79769e+308 | 0.0209584 | 1         |
| P2rx2_j2    | 0.336258  | 0.36824   | 0.131081     | 0.806039  | 0.935898  |
| Fbrsl1_j2   | 0.522247  | 0.993825  | 0.92826      | 0.0020997 | 0.0259752 |
| Fbrsl1_j4   | 0.4632    | 0.306921  | -0.593767    | 0.167333  | 0.503797  |
| Ep400_j3    | 0.0570043 | 0.0938988 | 0.720035     | 0.207234  | 1         |
| Ep400_j4    | 0.0943061 | 0.0922088 | -0.0324467   | 0.94621   | 1         |
| Pus1_j1     | 6.36132   | 7.61544   | 0.259601     | 0.135649  | 0.458263  |
| Miat_j11    | 1.36165   | 1.16625   | 0            | 1         | 1         |
| Asphd2_j7   | 0.676419  | 0.522213  | 0            | 1         | 1         |
| Asphd2_j8   | 3.52566   | 2.50259   | 0            | 1         | 1         |
| Sez6l_j5    | 0         | 0.09258   | 0            | 1         | 1         |
| Adrbk2_j4   | 1.03129   | 1.71779   | 0            | 1         | 1         |
| Sgsm1_j1    | 11.4685   | 10.8679   | 0            | 1         | 1         |
| Sart3_j2    | 0         | 0.117391  | 0            | 1         | 1         |
| Svop_j1     | 1.14676   | 0.253608  | 0            | 1         | 1         |
| Kctd10_j1   | 0         | 0.285902  | 0            | 1         | 1         |
| Mmab_j3     | 0.354711  | 0.441945  | 0            | 1         | 1         |
| Git2_j6     | 0.622935  | 1.52331   | 0            | 1         | 1         |
| Mlec_j1     | 22.8337   | 26.5179   | 0            | 1         | 1         |
| Cabp1       | 25.4788   | 25.8362   | 0            | 1         | 1         |
| Rnf10_j2    | 9.31173   | 18.7475   | 0            | 1         | 1         |

|                  |            |           |              |           |           |
|------------------|------------|-----------|--------------|-----------|-----------|
| Dynll1_j1        | 192.531    | 236.753   | 0.298291     | 0.0011081 | 0.0154978 |
| Sirt4            | 2.46637    | 2.43647   | -0.0175941   | 0.941218  | 0.982153  |
| Sirt4_j4         | 0.183615   | 0.298414  | 0.700633     | 0.327252  | 0.670225  |
| Ccdc64           | 3.77242    | 3.18122   | 0            | 1         | 1         |
| Tmem233_j4       | 11.7841    | 6.01764   | 0            | 1         | 1         |
| Srrm4            | 2.02016    | 3.05434   | 0            | 1         | 1         |
| Srrm4_j1         | 0.372925   | 0.802776  | 0            | 1         | 1         |
| Srrm4_j2         | 0          | 0.107422  | 0            | 1         | 1         |
| Pebp1_j3         | 11.0235    | 11.3563   | 0.0429004    | 0.806079  | 0.935898  |
| Fbxw8_j4         | 2.2526     | 1.87926   | 0            | 1         | 1         |
| Rnft2_j7         | 0.507305   | 0.479703  | 0            | 1         | 1         |
| Gm16065_j1       | 0.447379   | 0.37569   | 0            | 1         | 1         |
| Sdsl_j5          | 0.379384   | 0.495607  | 0.385537     | 0.531133  | 0.803433  |
| Plbd2_j1         | 1.6395     | 1.79332   | 0.129378     | 0.575509  | 0.828379  |
| Oas2_j5          | 0          | 0.0484034 | 1.79769e+308 | 0.0379346 | 1         |
| Oas2_j4          | 0.0365667  | 0.142099  | 1.95829      | 0.0165607 | 1         |
| Oas1c_j3         | 0.383335   | 0.321987  | 0            | 1         | 1         |
| Mapkapk5_j5      | 1.36186    | 1.60774   | 0            | 1         | 1         |
| Sh2b3_j3         | 0.0204639  | 0.0725342 | 0            | 1         | 1         |
| Cux2             | 1.2315     | 0.876791  | -0.490116    | 0.0699991 | 0.317567  |
| Ift81_j1         | 0          | 0.429775  | 1.79769e+308 | 2.20E-05  | 0.0005985 |
| Anapc5_j5        | 0          | 0.632531  | 0            | 1         | 1         |
| Anapc5_j7        | 0          | 1.76933   | 0            | 1         | 1         |
| Kdm2b_j2         | 0.205282   | 0.29314   | 0.513982     | 0.185468  | 0.525813  |
| Kdm2b_j8         | 0          | 0.257647  | 1.79769e+308 | 0.0001485 | 0.0029901 |
| Al480526_j4      | 0.195533   | 0.371561  | 0.926186     | 0.0155078 | 0.117584  |
| Al480526_j4      | 0.332095   | 0.257979  | -0.364346    | 0.317943  | 0.661333  |
| Vps33a_j9        | 10.0497    | 7.94124   | 0            | 1         | 1         |
| Abcb9_j3         | 0.321957   | 0.291211  | 0            | 1         | 1         |
| Gm16001          | 0.251638   | 0.112985  | -1.15522     | 0.042752  | 0.234022  |
| Pitpnm2_j5       | 1.21426    | 2.01985   | 0            | 1         | 1         |
| Pitpnm2_j6       | 0.598299   | 0.687139  | 0            | 1         | 1         |
| Pitpnm2_j7       | 5.91408    | 6.90538   | 0            | 1         | 1         |
| Cdk2ap1_j2       | 3.61023    | 3.30511   | -0.127396    | 0.338721  | 0.678961  |
| Cdk2ap1_j1       | 0.486718   | 0.624809  | 0.36033      | 0.149564  | 0.479072  |
| Ccdc92_j5        | 0          | 0.279498  | 0            | 1         | 1         |
| Ncor2_j15        | 2.45723    | 2.25139   | -0.126217    | 0.496977  | 0.783635  |
| Ncor2_j16        | 2.85015    | 2.52239   | -0.17625     | 0.232686  | 0.579823  |
| Ncor2_j18        | 1.18185    | 0.649192  | -0.864328    | 7.04E-05  | 0.0015905 |
| Scarb1_j1        | 4.01446    | 4.14292   | 0            | 1         | 1         |
| Dhx37_j4         | 2.03692    | 3.10378   | 0.607639     | 0.0046263 | 0.0478493 |
| XLOC_026130      | 0          | 0.0593374 | 1.79769e+308 | 0.104254  | 1         |
| 5930412G12Rik_j6 | 0.106231   | 0.238374  | 1.16603      | 0.0800096 | 0.343808  |
| Rimbp2_j2        | 0.00135866 | 0.281935  | 0            | 1         | 1         |
| Stx2_j3          | 0          | 0.970394  | 0            | 1         | 1         |
| Chchd2_j1        | 11.1487    | 13.1193   | 0.234823     | 0.127944  | 0.445708  |
| Gusb_j1          | 0.604045   | 0.574104  | 0            | 1         | 1         |

|             |            |           |              |           |           |
|-------------|------------|-----------|--------------|-----------|-----------|
| Sbds_j2     | 33.0247    | 43.478    | 0.396739     | 0.0001291 | 0.0026579 |
| Wbscr17_j4  | 1.63208    | 1.88182   | 0            | 1         | 1         |
| Auts2_j15   | 0.736176   | 1.50538   | 0            | 1         | 1         |
| Auts2_j13   | 2.14786    | 2.03268   | 0            | 1         | 1         |
| Wbscr16_j1  | 0.363622   | 0.826539  | 1.18465      | 0.0190417 | 0.136262  |
| Wbscr16_j2  | 1.02536    | 1.31356   | 0.357352     | 0.207733  | 0.552062  |
| Clip2_j7    | 19.9758    | 24.9413   | 0            | 1         | 1         |
| Vps37d_j2   | 0          | 0.326971  | 1.79769e+308 | 0.0057589 | 0.0566809 |
| Tmem120a_j1 | 11.9811    | 13.3621   | 0.157389     | 0.217502  | 0.563556  |
| Ywhag_j2    | 564.805    | 572.699   | 0            | 1         | 1         |
| Prkrip1_j1  | 7.76976    | 9.16762   | 0.238676     | 0.419929  | 0.73648   |
| Sh2b2       | 1.70E-05   | 0.117163  | 12.7511      | 0.97525   | 1         |
| Cux1        | 0          | 1.76337   | 0            | 1         | 1         |
| Cyp3a13_j6  | 0.115252   | 0.0944587 | -0.287035    | 0.711767  | 1         |
| Mcm7_j1     | 6.32712    | 7.01511   | 0.148917     | 0.263866  | 0.612658  |
| Taf6_j4     | 1.17079    | 1.04263   | 0            | 1         | 1         |
| BC037034_j4 | 2.18774    | 2.24709   | 0.0386189    | 0.83346   | 0.946358  |
| Gpc2_j9     | 0.0999821  | 0.208291  | 1.05886      | 0.333982  | 0.674869  |
| Pdgfa_j4    | 1.49428    | 1.73323   | 0            | 1         | 1         |
| Prkar1b_j5  | 34.5902    | 67.1782   | 0            | 1         | 1         |
| Zfand2a_j1  | 4.13716    | 5.49959   | 0            | 1         | 1         |
| Mad1l1_j2   | 0.150002   | 0.0817212 | 0            | 1         | 1         |
| Card11_j12  | 0.140221   | 0.173397  | 0.306382     | 0.703467  | 0.891491  |
| Mmd2_j3     | 2.64071    | 4.28607   | 0.698728     | 0.0012046 | 0.016596  |
| Mmd2_j2     | 0.0624873  | 0.805811  | 3.68881      | 5.30E-06  | 0.0001779 |
| Tnrc18_j5   | 0.218417   | 0.0166601 | 0            | 1         | 1         |
| Fbxl18_j3   | 0.56733    | 0.670019  | 0            | 1         | 1         |
| Fbxl18_j4   | 0          | 0.279133  | 0            | 1         | 1         |
| Fbxl18_j5   | 0          | 0.158401  | 0            | 1         | 1         |
| Fbxl18_j6   | 0.172665   | 0.31625   | 0            | 1         | 1         |
| Actb_j1     | 0.936583   | 1.59227   | 0.765611     | 0.0202197 | 0.141951  |
| Rnf216_j5   | 2.18047    | 2.75489   | 0            | 1         | 1         |
| Rbak_j6     | 0.276824   | 0.318852  | 0.203921     | 0.513569  | 0.792855  |
| Zfp316_j3   | 0.799133   | 1.33812   | 0.7437       | 0.0096977 | 0.083802  |
| Rac1_j5     | 40.3177    | 55.7496   | 0            | 1         | 1         |
| Tecpr1_j2   | 3.99247    | 5.38775   | 0            | 1         | 1         |
| Baiap2l1_j2 | 0.374196   | 0.357863  | -0.0643885   | 0.798733  | 0.933125  |
| Zkscan14_j1 | 0.00140471 | 0.191082  | 7.08778      | 0.412993  | 0.731915  |
| Usp12_j1    | 13.9489    | 5.53455   | 0            | 1         | 1         |
| XLOC_026263 | 0.0659765  | 0.0797645 | 0.273795     | 0.828831  | 1         |
| Flt1_j3     | 1.9939     | 2.12557   | 0.0922537    | 0.606786  | 0.845132  |
| Gm10167     | 2.28379    | 2.45299   | 0.103112     | 0.705491  | 0.892269  |
| Hsph1_j2    | 16.4115    | 19.1958   | 0            | 1         | 1         |
| N4bp2l2_j1  | 1.2021     | 1.14503   | -0.0701816   | 0.715977  | 0.897444  |
| Stard13_j6  | 0.95131    | 1.81176   | 0            | 1         | 1         |
| Gm9897_j1   | 0.183964   | 0.466675  | 1.343        | 0.0666076 | 0.308323  |
| Slc25a40_j8 | 0.233998   | 0.371441  | 0.666633     | 0.287531  | 0.635654  |

|                  |             |           |              |           |           |
|------------------|-------------|-----------|--------------|-----------|-----------|
| 9330182L06Rik_j2 | 1.68068     | 1.10173   | 0            | 1         | 1         |
| XLOC_025095      | 0           | 0.432779  | 1.79769e+308 | 0.0170654 | 0.126093  |
| XLOC_025095      | 0.0202408   | 0.588134  | 4.86081      | 0.0962747 | 0.383125  |
| 4933402N22Rik_j3 | 0.0303842   | 0.206092  | 2.7619       | 0.139052  | 0.463653  |
| XLOC_025099      | 0.0941476   | 0.130211  | 0.46786      | 0.751552  | 1         |
| XLOC_025099      | 6.71094     | 6.7355    | 0.00527038   | 0.974444  | 0.992676  |
| XLOC_025101      | 25.2804     | 27.1784   | 0.104443     | 0.343103  | 0.682969  |
| Pclo_j1          | 0.0904794   | 0.0984319 | 0            | 1         | 1         |
| Magi2_j3         | 0           | 0.338424  | 1.79769e+308 | 9.44E-06  | 0.0002958 |
| Fam185a_j1       | 0           | 0.0552348 | 1.79769e+308 | 0.108724  | 1         |
| Psmc2_j1         | 71.1244     | 78.811    | 0.148052     | 0.104994  | 0.402253  |
| AK044020_j2      | 4.44773     | 3.48959   | -0.350012    | 0.199054  | 0.542198  |
| Accn3_j1         | 64.6794     | 70.207    | 0.118309     | 0.175758  | 0.514267  |
| Slc4a2_j4        | 15.3053     | 16.0627   | 0            | 1         | 1         |
| Agap3_j1         | 2.08222     | 2.43442   | 0            | 1         | 1         |
| Agap3_j7         | 10.1696     | 15.2594   | 0            | 1         | 1         |
| Agap3_j9         | 6.40103     | 10.2869   | 0            | 1         | 1         |
| 2010209O12Rik_j2 | 0.350432    | 0.347403  | -0.0125238   | 0.959389  | 0.988456  |
| Gm7361_j2        | 1.94E-05    | 0.321692  | 14.0191      | 1         | 1         |
| Gm7361_j6        | 0           | 0.178208  | 1.79769e+308 | 0.0025842 | 0.0306382 |
| Dpp6_j5          | 0           | 0.193868  | 1.79769e+308 | 0.0760659 | 0.333082  |
| Rbm33_j2         | 0.000132989 | 0.78219   | 0            | 1         | 1         |
| Rbm33_j9         | 0.36964     | 0.463194  | 0            | 1         | 1         |
| 9530036O11Rik_j4 | 0.246547    | 0.218437  | -0.17464     | 0.806265  | 0.935928  |
| 9530036O11Rik_j6 | 0           | 0.091517  | 1.79769e+308 | 0.0787132 | 1         |
| Nom1_j2          | 0.00481469  | 0.0913325 | 4.24561      | 0.199443  | 1         |
| Ube3c_j3         | 2.60048     | 1.81822   | 0            | 1         | 1         |
| Hadhb_j3         | 9.58537     | 9.42287   | -0.0246666   | 0.915915  | 0.973788  |
| Gm1060_j6        | 0.177806    | 0.402385  | 1.17827      | 0.0384277 | 0.218074  |
| Abhd1_j1         | 0.691093    | 0.714351  | 0.0477529    | 0.838246  | 0.948409  |
| Cad_j4           | 3.16253     | 3.36891   | 0            | 1         | 1         |
| Nrbp1_j8         | 0.441273    | 0.495645  | 0            | 1         | 1         |
| Gpn1_j3          | 1.89252     | 1.33385   | -0.504705    | 0.220505  | 0.567353  |
| Bre_j1           | 10.5254     | 11.0142   | 0            | 1         | 1         |
| Bre_j4           | 0           | 1.04766   | 0            | 1         | 1         |
| Depdc5_j11       | 2.52566     | 2.49364   | -0.0184088   | 0.946734  | 0.984263  |
| Depdc5_j12       | 2.17516     | 3.88603   | 0.837172     | 0.0017809 | 0.0227714 |
| Ywhah_j6         | 90.8106     | 100.917   | 0            | 1         | 1         |
| Tacc3_j1         | 1.02791     | 1.15761   | 0            | 1         | 1         |
| Gm1673           | 17.3061     | 22.3815   | 0.371027     | 0.0692449 | 0.315461  |
| Sh3bp2_j3        | 0           | 0.185356  | 1.79769e+308 | 0.0289651 | 0.181326  |
| Add1             | 0           | 0.152735  | 0            | 1         | 1         |
| Htt_j3           | 0.208282    | 0.141401  | -0.558748    | 0.0514717 | 0.263048  |
| Acox3_j2         | 3.16228     | 3.24812   | 0            | 1         | 1         |
| Ablim2_j3        | 6.42441     | 4.26055   | 0            | 1         | 1         |
| Afap1_j6         | 0.0555645   | 0.0916568 | 0            | 1         | 1         |
| Ppp2r2c_j3       | 0.922631    | 0.448598  | -1.04033     | 0.0061332 | 0.0595946 |

|                   |           |             |              |           |           |
|-------------------|-----------|-------------|--------------|-----------|-----------|
| Ppp2r2c_j4        | 0         | 0.0573467   | 1.79769e+308 | 0.0611219 | 1         |
| Crmp1_j2          | 9.56508   | 17.8402     | 0            | 1         | 1         |
| Evc2_j6           | 0         | 0.385722    | 1.79769e+308 | 0.0063703 | 0.0613721 |
| Lyar_j3           | 1.40735   | 1.73127     | 0.298847     | 0.326599  | 0.669796  |
| XLOC_025226       | 6.21075   | 7.07105     | 0.187157     | 0.289271  | 0.636786  |
| Cc2d2a_j6         | 0.0057452 | 0.376697    | 0            | 1         | 1         |
| Bst1_j1           | 0.0410068 | 0.12936     | 1.65745      | 0.109613  | 1         |
| Cd38_j3           | 0.595874  | 1.13644     | 0.931445     | 0.0049723 | 0.05051   |
| AK149205_j1       | 0.962844  | 1.01347     | 0.0739314    | 0.803219  | 0.934684  |
| XLOC_025235       | 0.0607821 | 0.0540214   | -0.170115    | 0.905967  | 1         |
| XLOC_025238       | 0.117942  | 0.152279    | 0.368636     | 0.686602  | 1         |
| Med28_j1          | 0.174465  | 0.419999    | 1.26745      | 0.0653076 | 0.304504  |
| Slit2_j3          | 0.134869  | 0.0870573   | 0            | 1         | 1         |
| Slit2_j9          | 0.42585   | 0.245272    | 0            | 1         | 1         |
| Zcchc4_j1         | 0.439216  | 0.288152    | -0.6081      | 0.287394  | 0.635587  |
| XLOC_025250       | 0         | 0.300227    | 0            | 1         | 1         |
| XLOC_025250       | 0.223242  | 0.535623    | 0            | 1         | 1         |
| XLOC_025250       | 0.222974  | 0.556162    | 0            | 1         | 1         |
| Pgm1              | 0.621658  | 0.810344    | 0.382413     | 0.324482  | 0.667503  |
| Tbc1d1_j4         | 0.593381  | 0.472261    | 0            | 1         | 1         |
| Klf3_j5           | 1.02304   | 1.07451     | 0            | 1         | 1         |
| XLOC_025266       | 0.108962  | 0.146632    | 0.428378     | 0.430014  | 1         |
| Wdr19             | 0.843842  | 0.914271    | 0.115649     | 0.649521  | 0.865346  |
| Wdr19_j6          | 0.42406   | 0.671832    | 0.663832     | 0.021211  | 0.146608  |
| XLOC_025269       | 0.0630685 | 0.23883     | 1.921        | 0.144929  | 0.472616  |
| Limch1_j3         | 0         | 0.195216    | 0            | 1         | 1         |
| Tmem33_j2         | 0         | 0.129787    | 1.79769e+308 | 0.0007854 | 1         |
| Tmem33_j1         | 0.0702726 | 0.372732    | 2.4071       | 1.34E-05  | 0.0003981 |
| Tmem33            | 13.4051   | 12.7907     | -0.0676883   | 0.473709  | 0.7701    |
| Slc30a9_j1        | 0.983988  | 2.79357     | 0            | 1         | 1         |
| XLOC_025284       | 0.0928512 | 0.605649    | 2.70549      | 0.0943095 | 0.378457  |
| Guf1_j3           | 1.94389   | 1.75123     | -0.150582    | 0.293911  | 0.640718  |
| XLOC_025288       | 0.0522004 | 0.240638    | 2.20473      | 0.0384501 | 0.218169  |
| Atp10d_j4         | 0.106943  | 0.11608     | 0.118276     | 0.846236  | 1         |
| Atp10d_j9         | 0         | 0.0794134   | 1.79769e+308 | 0.0247095 | 1         |
| Atp10d_j13        | 0.338495  | 0.415064    | 0.2942       | 0.544815  | 0.811727  |
| Slc10a4_j2        | 0         | 0.0953492   | 1.79769e+308 | 0.0652234 | 1         |
| Dcun1d4_j4        | 0         | 0.0952179   | 0            | 1         | 1         |
| Pdgfra_j3         | 0         | 0.0985839   | 0            | 1         | 1         |
| XLOC_025306       | 0.0539475 | 0.144461    | 1.42105      | 0.119415  | 1         |
| Srd5a3_j4         | 0         | 0.802989    | 1.79769e+308 | 0.0077686 | 0.0710632 |
| C530008M17Rik_j10 | 0         | 0.0589774   | 0            | 1         | 1         |
| Paics_j2          | 1.32536   | 2.27686     | 0            | 1         | 1         |
| Rest              | 0.245386  | 0.360645    | 0.555527     | 0.0857512 | 0.35754   |
| Lphn3_j4          | 0.259593  | 0.000778003 | -8.38226     | 0.140638  | 0.466453  |
| Ythdc1_j6         | 2.59104   | 2.72098     | 0.0705968    | 0.71949   | 0.89916   |
| Rufy3             | 81.0895   | 66.707      | 0            | 1         | 1         |

|                  |             |           |               |           |           |
|------------------|-------------|-----------|---------------|-----------|-----------|
| Slc4a4_j3        | 4.39804     | 5.28537   | 0             | 1         | 1         |
| Mthfd2l_j8       | 3.57089     | 3.16136   | -0.175737     | 0.421599  | 0.737768  |
| Parm1_j1         | 0.897146    | 2.06968   | 1.20599       | 8.29E-08  | 4.55E-06  |
| Uso1_j1          | 1.17219     | 2.13903   | 0             | 1         | 1         |
| Uso1_j3          | 5.5712      | 7.1485    | 0             | 1         | 1         |
| Fras1_j8         | 0           | 0.088724  | 1.79769e+308  | 0.0055536 | 1         |
| Bmp2k_j2         | 0.127581    | 0.263117  | 1.04429       | 0.350482  | 0.687883  |
| Bmp2k_j6         | 0.498724    | 0.736031  | 0.561525      | 0.0390809 | 0.220549  |
| 1700007G11Rik_j3 | 0.248488    | 0.269148  | 0.115228      | 0.902141  | 0.968734  |
| Cops4_j1         | 19.6474     | 18.452    | 0             | 1         | 1         |
| Cds1_j4          | 1.28563     | 1.66455   | 0             | 1         | 1         |
| Nudt9_j1         | 2.49866     | 4.81763   | 0.947168      | 3.38E-05  | 0.0008576 |
| Ibsp_j1          | 0           | 0.457822  | 1.79769e+308  | 0.0002207 | 0.0041581 |
| Pkd2_j5          | 0.0194747   | 0.0695398 | 0             | 1         | 1         |
| Pkd2_j7          | 0.785525    | 0.881478  | 0             | 1         | 1         |
| D930016D06Rik_j7 | 0.000762523 | 0.292372  | 0             | 1         | 1         |
| Lrrc8c_j3        | 0           | 0.0539456 | 0             | 1         | 1         |
| Lrrc8d_j4        | 15.9822     | 14.8155   | 0             | 1         | 1         |
| Lrrc8d_j6        | 0.000538041 | 4.83692   | 0             | 1         | 1         |
| Znf326           | 0.319642    | 0.559484  | 0             | 1         | 1         |
| Cdc7_j2          | 0.039645    | 0.104972  | 1.40479       | 0.17609   | 1         |
| Brdt_j2          | 0.898112    | 0.931894  | 0.053271      | 0.860276  | 0.955778  |
| Rpl5_j4          | 0.306859    | 1.51745   | 0             | 1         | 1         |
| Mtf2_j4          | 0.216499    | 0.437956  | 0             | 1         | 1         |
| XLOC_025396      | 0.0596479   | 0.115519  | 0             | 1         | 1         |
| Pde6b_j4         | 0.0769369   | 0.493331  | 2.68081       | 0.0619119 | 0.294332  |
| Idua_j5          | 0.167039    | 0.244757  | 0             | 1         | 1         |
| Idua_j4          | 0           | 0.0799426 | 0             | 1         | 1         |
| XLOC_025402      | 1.47401     | 1.54197   | 0.0650247     | 0.743996  | 0.910543  |
| AK142681_j2      | 0.0316824   | 0.0753071 | 0             | 1         | 1         |
| Zfp932_j4        | 0.725717    | 0.548097  | 0             | 1         | 1         |
| Zfp932_j3        | 0.865678    | 1.25662   | 0             | 1         | 1         |
| Pole_j6          | 0.356558    | 0.328933  | -0.116344     | 0.731105  | 0.904922  |
| Chek2_j2         | 0.21136     | 0.174171  | -0.2792       | 0.716747  | 0.897719  |
| Crybb1_j2        | 0.521064    | 1.01265   | 0.958605      | 0.0799301 | 0.343618  |
| Tfip11_j1        | 0.45183     | 0.554552  | 0             | 1         | 1         |
| Wscd2_j4         | 0.0032647   | 0.311053  | 6.57406       | 0.057821  | 0.282123  |
| Ficd_j1          | 3.97164     | 3.76582   | -0.0767685    | 0.616091  | 0.848645  |
| Usp30_j2         | 0           | 0.885729  | 0             | 1         | 1         |
| Acacb_j6         | 0.115952    | 0.115506  | -0.005562     | 0.992067  | 1         |
| Acacb_j4         | 0.0332633   | 0.0748791 | 1.17063       | 0.166373  | 1         |
| Acacb_j5         | 0.115952    | 0         | -1.79769e+308 | 8.65E-06  | 1         |
| Acacb_j12        | 0.842834    | 0.666003  | -0.339719     | 0.446303  | 0.753343  |
| XLOC_025432      | 0.115123    | 0.163746  | 0             | 1         | 1         |
| Sppl3_j2         | 0.52306     | 0.691461  | 0.402671      | 0.288161  | 0.636106  |
| Pop5_j2          | 0.434197    | 0.565247  | 0             | 1         | 1         |
| Msi1_j2          | 0.501194    | 0.247035  | 0             | 1         | 1         |

|              |            |           |           |           |           |
|--------------|------------|-----------|-----------|-----------|-----------|
| Pxn_j2       | 2.92215    | 3.4925    | 0         | 1         | 1         |
| Gcn1l1_j2    | 0.278886   | 0.382482  | 0         | 1         | 1         |
| Gcn1l1_j4    | 1.63934    | 1.84806   | 0         | 1         | 1         |
| Gcn1l1_j8    | 0          | 0.152619  | 0         | 1         | 1         |
| Cit_j1       | 0.160621   | 0.107183  | -0.583586 | 0.20863   | 0.552726  |
| Cit_j7       | 0.089214   | 0.0664665 | -0.424643 | 0.466978  | 1         |
| AK049264_j1  | 0.0663354  | 0.130768  | 0.979157  | 0.241196  | 1         |
| Ksr2         | 2.58949    | 1.95597   | -0.404783 | 0.0014719 | 0.0194422 |
| Fbxo21_j1    | 0          | 0.2765    | 0         | 1         | 1         |
| Tbx3_j3      | 0          | 0.0919884 | 0         | 1         | 1         |
| Ddx54_j1     | 0.663533   | 0.767468  | 0.209938  | 0.381014  | 0.711658  |
| Ddx54_j3     | 11.2221    | 12.6473   | 0.172493  | 0.112459  | 0.41729   |
| mKIAA0614_j2 | 8.62249    | 7.95869   | -0.115574 | 0.294503  | 0.641226  |
| Brap_j1      | 41.8369    | 44.0871   | 0.0755818 | 0.403153  | 0.726176  |
| Fam109a_j1   | 0.224861   | 0.468362  | 0         | 1         | 1         |
| Setd1b_j2    | 1.05106    | 0.944044  | 0         | 1         | 1         |
| Setd1b_j3    | 0.509665   | 0.221455  | 0         | 1         | 1         |
| Wdr66_j4     | 0.0123548  | 0.0508403 | 2.0409    | 0.213167  | 1         |
| Ccdc62_j8    | 0.251675   | 0.335881  | 0.416389  | 0.513032  | 0.792379  |
| Hip1r_j2     | 0.328499   | 0.0538012 | -2.61018  | 0.0003946 | 0.0067021 |
| Ddx55_j3     | 2.45714    | 2.79809   | 0.187459  | 0.33311   | 0.67409   |
| Gtf2h3_j1    | 0.239257   | 0.406756  | 0.7656    | 0.349048  | 0.687     |
| Tctn2_j4     | 0.569956   | 0.505388  | -0.17346  | 0.711277  | 0.895071  |
| Dnahc10_j2   | 0.0887521  | 0.0539474 | -0.718228 | 0.599498  | 1         |
| Dnahc10_j1   | 0.0504648  | 0.115963  | 1.20032   | 0.276275  | 1         |
| XLOC_025519  | 0.0479584  | 0.126767  | 1.40232   | 0.0777121 | 1         |
| XLOC_025526  | 0.00259975 | 0.447808  | 7.42836   | 0.0069563 | 0.0655528 |
| XLOC_025526  | 0.398638   | 0.465338  | 0.223202  | 0.477994  | 0.77269   |
| XLOC_025526  | 0.242238   | 0.496072  | 1.03413   | 0.0187126 | 0.134697  |
| XLOC_025527  | 0.143753   | 0.221267  | 0.622199  | 0.369313  | 0.702675  |
| Ran_j3       | 0.00182716 | 0.331391  | 0         | 1         | 1         |
| Srsf8_j2     | 0.146604   | 0.0295329 | 0         | 1         | 1         |
| Srsf8_j3     | 0.134033   | 0.188302  | 0         | 1         | 1         |
| Mmp17_j2     | 0.231839   | 0.213433  | 0         | 1         | 1         |
| Cct6a_j3     | 53.1645    | 56.2693   | 0         | 1         | 1         |
| Sumf2_j1     | 4.2175     | 4.93482   | 0.226611  | 0.247601  | 0.595013  |
| Crcp_j1      | 4.9963     | 6.64818   | 0.412098  | 0.190071  | 0.531884  |
| Gtf2ird2_j2  | 0.0293366  | 0.0635835 | 0         | 1         | 1         |
| Gtf2ird2_j7  | 1.14342    | 1.38175   | 0         | 1         | 1         |
| Wbscr27_j2   | 0.915778   | 0.95795   | 0.0649518 | 0.877531  | 0.96086   |
| Wbscr27      | 0.153869   | 0.698165  | 2.18187   | 0.0102004 | 0.086776  |
| Wbscr27_j5   | 0.312895   | 0.363702  | 0.217081  | 0.779114  | 0.925601  |
| Bcl7b_j1     | 5.92789    | 7.85252   | 0         | 1         | 1         |
| Baz1b_j1     | 0          | 0.149375  | 0         | 1         | 1         |
| Nsun5_j2     | 0          | 0.220289  | 0         | 1         | 1         |
| Nsun5_j3     | 0.458384   | 0.613019  | 0         | 1         | 1         |
| Nsun5_j5     | 1.41251    | 1.19029   | 0         | 1         | 1         |



|                  |            |           |              |           |           |
|------------------|------------|-----------|--------------|-----------|-----------|
| Por_j6           | 7.42672    | 9.14012   | 0            | 1         | 1         |
| Rasa4_j5         | 1.34939    | 2.79953   | 1.05287      | 0.0011107 | 0.01553   |
| Plod3_j3         | 0          | 0.372247  | 0            | 1         | 1         |
| Vgf_j2           | 0.0868067  | 0.509559  | 2.55337      | 0.0012322 | 0.0168948 |
| Trfr2_j7         | 0.162058   | 0.283163  | 0.805122     | 0.193794  | 0.536058  |
| 2010007H12Rik_j1 | 1.19215    | 1.83811   | 0            | 1         | 1         |
| 0910001L09Rik_j2 | 23.6653    | 24.4244   | 0.0455449    | 0.645854  | 0.863424  |
| Eif3b_j1         | 0.111702   | 0.457191  | 2.03314      | 0.0518933 | 0.264288  |
| XLOC_025616      | 0.0467835  | 0.0797894 | 0.770199     | 0.391677  | 1         |
| Chst12_j2        | 8.05088    | 10.8806   | 0            | 1         | 1         |
| Lfng_j2          | 1.71112    | 1.90879   | 0.157719     | 0.509177  | 0.790813  |
| AA881470_j3      | 0.154037   | 0.234417  | 0.605803     | 0.549524  | 0.814804  |
| Amz1_j6          | 0.198512   | 0.98623   | 2.3127       | 0.0003481 | 0.0060281 |
| Sdk1_j1          | 0.00520593 | 0.831142  | 0            | 1         | 1         |
| Wipi2_j1         | 17.2721    | 20.6597   | 0            | 1         | 1         |
| Fscn1_j4         | 0.362677   | 0.736964  | 0            | 1         | 1         |
| Zfp12_j3         | 0.744376   | 0.632606  | -0.234724    | 0.391986  | 0.718356  |
| Grid2ip_j3       | 0.187493   | 0.151255  | 0            | 1         | 1         |
| XLOC_025636      | 0.218953   | 0.21728   | 0            | 1         | 1         |
| Pms2_j1          | 0.145155   | 0.244902  | 0            | 1         | 1         |
| Pms2_j2          | 0.509425   | 0.358396  | 0            | 1         | 1         |
| Rsph10b2_j7      | 0.038158   | 0.0744044 | 0.963402     | 0.464337  | 1         |
| Rsph10b2_j6      | 0          | 0.0554748 | 1.79769e+308 | 0.0890212 | 1         |
| Rsph10b2_j11     | 0.0657503  | 0.0917876 | 0.481303     | 0.780404  | 1         |
| Trrap_j3         | 0.774181   | 0.807393  | 0.0606001    | 0.744581  | 0.910838  |
| Trrap_j11        | 0.237322   | 0.552494  | 1.21911      | 0.0011537 | 0.0160215 |
| Trrap_j16        | 1.00882    | 1.35236   | 0.422802     | 0.152892  | 0.484918  |
| Zfp498_j4        | 0.644904   | 0.446815  | -0.529406    | 0.190032  | 0.531883  |
| Cdk8_j9          | 0          | 0.0686892 | 1.79769e+308 | 0.0596731 | 1         |
| Polr1d_j2        | 17.8943    | 18.5053   | 0            | 1         | 1         |
| Pan3_j11         | 0          | 0.106978  | 0            | 1         | 1         |
| Mtus2_j1         | 0.822572   | 2.43997   | 0            | 1         | 1         |
| Alox5ap_j1       | 0          | 0.466426  | 1.79769e+308 | 0.0083124 | 0.0747174 |
| AK138849_j3      | 0          | 0.142652  | 1.79769e+308 | 0.0404973 | 1         |
| B3galtl_j1       | 0.7226     | 0.420334  | 0            | 1         | 1         |
| Fry_j3           | 1.42837    | 1.3141    | 0            | 1         | 1         |
| Fry_j2           | 2.79891    | 1.36135   | 0            | 1         | 1         |
| Brca2_j3         | 0.172045   | 0.129283  | -0.412256    | 0.409966  | 0.730025  |
| Mterf            | 0.358384   | 0.703597  | 0.973244     | 0.0775743 | 0.337104  |
| Cyp51_j3         | 15.9896    | 18.7848   | 0            | 1         | 1         |
| Cdk14_j1         | 1.57032    | 1.39547   | 0            | 1         | 1         |
| Steap2_j2        | 0.150203   | 0.231344  | 0            | 1         | 1         |
| Adam22_j2        | 0.439618   | 0.5733    | 0.38304      | 0.0538838 | 0.270496  |
| Gm5152_j1        | 0.329131   | 0.449713  | 0.450342     | 0.494021  | 0.782369  |
| Gm9758           | 0.0358125  | 0.369649  | 3.36762      | 0.0126287 | 0.101902  |
| Gm17019_j1       | 0.0331625  | 0.394531  | 3.57251      | 0.0004262 | 0.0071279 |
| Speer4c_j1       | 0.065091   | 0.237489  | 1.86733      | 0.0627362 | 0.296659  |

|                  |           |           |              |           |           |
|------------------|-----------|-----------|--------------|-----------|-----------|
| AK046351_j3      | 0         | 0.164802  | 1.79769e+308 | 0.0066046 | 0.0629442 |
| Kcnh2_j1         | 3.27336   | 3.05877   | 0            | 1         | 1         |
| Gbx1_j1          | 0.27739   | 0.315969  | 0            | 1         | 1         |
| Abcf2_j3         | 3.44247   | 6.92671   | 1.00873      | 2.70E-09  | 2.09E-07  |
| Smarcd3_j2       | 0.443717  | 0.339134  | -0.387782    | 0.220589  | 0.567463  |
| Prkag2_j1        | 0.356816  | 0.22484   | 0            | 1         | 1         |
| Mll3_j13         | 0.928059  | 0.875176  | -0.0846434   | 0.618748  | 0.850257  |
| Mll3_j12         | 0.182724  | 0.11223   | -0.703213    | 0.077882  | 0.337884  |
| Xrcc2_j1         | 0         | 0.239034  | 1.79769e+308 | 0.0006546 | 0.0101708 |
| Hadha_j2         | 1.15297   | 1.92116   | 0            | 1         | 1         |
| Slc5a6_j3        | 0.171441  | 0.171225  | -0.00182021  | 0.997761  | 0.999228  |
| Mpv17_j1         | 0.609786  | 0.87152   | 0            | 1         | 1         |
| Gtf3c2_j1        | 6.15319   | 7.04388   | 0            | 1         | 1         |
| Gtf3c2_j2        | 1.03569   | 1.21722   | 0            | 1         | 1         |
| Ppm1g_j9         | 19.1814   | 20.0758   | 0            | 1         | 1         |
| Fam53a_j2        | 0         | 0.184221  | 1.79769e+308 | 0.0277075 | 0.17633   |
| Letm1_j2         | 5.15019   | 6.37216   | 0            | 1         | 1         |
| XLOC_025802      | 0.107646  | 0.140946  | 0.388849     | 0.694965  | 1         |
| Cpz_j1           | 0.0579938 | 0.133447  | 1.2023       | 0.269187  | 1         |
| 2310079F23Rik_j1 | 0         | 0.08257   | 1.79769e+308 | 0.0008113 | 1         |
| Sh3tc1_j4        | 0.0230637 | 0.101657  | 2.14002      | 1         | 1         |
| Tbc1d14_j2       | 4.59836   | 5.14616   | 0            | 1         | 1         |
| Mrfap1_j1        | 143.357   | 144.443   | 0.0108881    | 0.902689  | 0.968976  |
| Wfs1_j1          | 13.0487   | 15.6179   | 0            | 1         | 1         |
| Evc_j3           | 0.238786  | 0.505701  | 1.08256      | 0.0036859 | 0.0405333 |
| Wdr1             | 69.0047   | 76.3693   | 0            | 1         | 1         |
| Kcnip4_j1        | 5.75251   | 6.43116   | 0            | 1         | 1         |
| Gpr125_j4        | 2.35188   | 2.58941   | 0            | 1         | 1         |
| Sepsecs          | 0.131911  | 0.256353  | 0            | 1         | 1         |
| Ugdh_j4          | 0.780978  | 1.0339    | 0            | 1         | 1         |
| Pds5a_j2         | 2.93134   | 2.93738   | 0            | 1         | 1         |
| Apbb2_j5         | 3.91977   | 3.91363   | 0            | 1         | 1         |
| Bend4_j1         | 0.211195  | 0.622404  | 0            | 1         | 1         |
| Atp8a1_j4        | 2.1475    | 5.78325   | 0            | 1         | 1         |
| Kctd8_j2         | 0         | 2.06483   | 1.79769e+308 | 1.09E-08  | 7.56E-07  |
| Gnpda2_j1        | 5.94473   | 8.26109   | 0            | 1         | 1         |
| Gabra2_j7        | 1.7497    | 1.8832    | 0            | 1         | 1         |
| Gabra2           | 0.147102  | 0.379211  | 0            | 1         | 1         |
| Ln timer_j1      | 1.05947   | 0.822559  | 0            | 1         | 1         |
| XLOC_025900      | 0.134569  | 0.231124  | 0.780321     | 0.277408  | 0.62639   |
| Spink2_j2        | 0.172798  | 0.275639  | 0.673697     | 0.553672  | 0.817251  |
| Epha5_j4         | 0.725098  | 0.955995  | 0.398827     | 0.0661677 | 0.307163  |
| Cenpc1_j5        | 0.031136  | 0.0685119 | 0            | 1         | 1         |
| Tmprss11c_j3     | 4.66E-05  | 0.130489  | 11.4512      | 0.938258  | 1         |
| Igj_j3           | 0.055425  | 0.228189  | 2.04162      | 0.0960686 | 0.382743  |
| Grsf1_j2         | 0.88436   | 3.90278   | 0            | 1         | 1         |
| Gc_j2            | 0         | 0.133449  | 1.79769e+308 | 0.0288751 | 1         |

|             |            |            |           |           |           |
|-------------|------------|------------|-----------|-----------|-----------|
| Adamts3_j3  | 0.304088   | 0.216749   | -0.488466 | 0.508728  | 0.790491  |
| Ankrd17_j2  | 0.22504    | 0.114986   | 0         | 1         | 1         |
| Rassf6_j7   | 0.0328752  | 0.092342   | 1.48999   | 0.390332  | 1         |
| Rchy1_j1    | 11.6515    | 13.4422    | 0.206249  | 0.160672  | 0.495357  |
| G3bp2_j3    | 0.223731   | 0.355859   | 0         | 1         | 1         |
| Cxcl11_j2   | 0.242021   | 0.189776   | 0         | 1         | 1         |
| Nup54_j7    | 0.324964   | 0          | 0         | 1         | 1         |
| Antxr2_j1   | 0.0359354  | 0.0627085  | 0         | 1         | 1         |
| Prkg2_j2    | 0.835833   | 0.234488   | -1.8337   | 0.0009794 | 0.0140579 |
| Hnrnpd      | 11.2302    | 11.7564    | 0.0660683 | 0.640451  | 0.861115  |
| Hnrpd_j3    | 4.93548    | 5.81572    | 0.236766  | 0.147156  | 0.475739  |
| Hnrpd_l     | 0.587963   | 0.00022244 | -11.3681  | 0.595432  | 0.838859  |
| Lin54_j1    | 0          | 0.0826471  | 0         | 1         | 1         |
| Coq2_j7     | 2.96648    | 3.18889    | 0         | 1         | 1         |
| Helq_j2     | 0.270472   | 0.248142   | -0.12431  | 0.793138  | 0.931055  |
| Wdfy3_j4    | 0.1917     | 0.248226   | 0.37281   | 0.312029  | 0.656477  |
| Wdfy3_j6    | 0.168633   | 0.252679   | 0.583418  | 0.0527422 | 0.266882  |
| Klhl8_j2    | 0.639326   | 0.861725   | 0         | 1         | 1         |
| Hsd17b11_j3 | 0.707748   | 0.431428   | -0.714117 | 0.210253  | 0.554818  |
| Gbp4_j5     | 0.23915    | 0.113394   | -1.07656  | 0.148144  | 0.476937  |
| Mpa2l_j3    | 0.30494    | 0.0591813  | -2.36531  | 0.0349041 | 0.205267  |
| Zfp644_j2   | 0.147077   | 0.224714   | 0         | 1         | 1         |
| Zfp644_j3   | 0.182845   | 0.330427   | 0         | 1         | 1         |
| Hfm1_j9     | 0.074992   | 0.0781468  | 0.0594504 | 0.974267  | 1         |
| Hfm1_j16    | 0.0610663  | 0.154516   | 1.33931   | 0.343534  | 1         |
| Hfm1_j17    | 0.00188401 | 0.0960868  | 5.67246   | 0.63397   | 1         |
| Hfm1_j19    | 0.351607   | 0.14503    | -1.27761  | 0.156146  | 0.489534  |
| XLOC_025977 | 0.474012   | 1.11928    | 1.23957   | 1.15E-05  | 0.0003474 |
| Evi5_j2     | 0.797684   | 0.725002   | 0         | 1         | 1         |
| Evi5_j3     | 0.557334   | 0.586885   | 0         | 1         | 1         |
| Mfsd7a_j1   | 0.0560027  | 0.164188   | 1.55178   | 0.229976  | 0.577072  |
| Slc26a1     | 0.166018   | 0.0730089  | 0         | 1         | 1         |
| Crlf2_j6    | 0.474353   | 0.409535   | -0.211976 | 0.64858   | 0.864697  |
| AK138792_j1 | 0.0309394  | 0.273354   | 3.14325   | 0.0565082 | 0.27814   |
| Gtpbp6_j2   | 0.542511   | 1.33835    | 0         | 1         | 1         |
| Gtpbp6_j4   | 1.68041    | 1.68122    | 0         | 1         | 1         |
| P2rx2_j1    | 0.244539   | 0.48353    | 0.983541  | 0.0585931 | 0.284494  |
| Ep400_j12   | 0.0110004  | 0.200465   | 4.18772   | 0.0001929 | 0.0037234 |
| Miat_j4     | 12.632     | 3.1309     | 0         | 1         | 1         |
| Miat_j5     | 0.851749   | 0.96246    | 0         | 1         | 1         |
| Srrd_j1     | 2.83864    | 3.19182    | 0         | 1         | 1         |
| Asphd2_j5   | 0.511141   | 2.35169    | 0         | 1         | 1         |
| Sez6l_j1    | 0.0838241  | 0.100402   | 0         | 1         | 1         |
| Sgsm1_j2    | 1.12273    | 1.64336    | 0         | 1         | 1         |
| Ssh1_j2     | 0.806296   | 2.56765    | 0         | 1         | 1         |
| Svop_j2     | 0          | 0.11931    | 0         | 1         | 1         |
| Alkbh2_j1   | 0.0070098  | 0.749152   | 6.73974   | 0.0826367 | 0.35034   |

|             |           |           |               |           |           |
|-------------|-----------|-----------|---------------|-----------|-----------|
| Trpv4_j1    | 0.0460647 | 0.0761902 | 0.725944      | 0.468992  | 1         |
| Trpv4_j2    | 0         | 0.0725723 | 1.79769e+308  | 0.0358225 | 1         |
| Git2_j2     | 1.15565   | 1.34908   | 0             | 1         | 1         |
| Git2_j3     | 0.686456  | 1.15278   | 0             | 1         | 1         |
| Gm13826_j2  | 0.0682686 | 0.076767  | 0.169264      | 0.907354  | 1         |
| Cabp1_j1    | 0.55674   | 0.574455  | 0             | 1         | 1         |
| Cabp1_j2    | 0.369644  | 1.92014   | 0             | 1         | 1         |
| Cabp1_j7    | 6.18942   | 6.11919   | 0             | 1         | 1         |
| Gatc_j1     | 6.4605    | 5.75191   | -0.167606     | 0.278905  | 0.627636  |
| Ccdc64      | 2.45587   | 2.97359   | 0             | 1         | 1         |
| Tmem233_j1  | 19.2834   | 10.3122   | 0             | 1         | 1         |
| Sdsl_j1     | 0.76478   | 0.695537  | -0.136917     | 0.716753  | 0.897719  |
| Sdsl_j6     | 2.99462   | 2.75064   | -0.122605     | 0.692798  | 0.8862    |
| Oas2_j1     | 0.0437521 | 0.100233  | 1.19594       | 0.177436  | 1         |
| Oas1c_j4    | 0.0390157 | 0.122884  | 0             | 1         | 1         |
| Rph3a_j6    | 0.759118  | 0.892954  | 0             | 1         | 1         |
| Trafd1_j8   | 0.0829787 | 0.184138  | 1.14997       | 0.165573  | 0.502238  |
| Trafd1_j9   | 0.208175  | 0.270773  | 0.37929       | 0.391796  | 0.718161  |
| Mapkapk5_j2 | 0.763432  | 0.584122  | 0             | 1         | 1         |
| Mapkapk5_j7 | 4.87271   | 5.2272    | 0             | 1         | 1         |
| Sh2b3_j1    | 0.27258   | 0.320737  | 0             | 1         | 1         |
| Cux2_j7     | 0.632355  | 0.423248  | -0.579229     | 0.0780073 | 0.338307  |
| Cux2_j8     | 0.136116  | 0.273833  | 1.00846       | 0.0156424 | 0.118268  |
| Atp2a2_j4   | 0.318058  | 0.459702  | 0             | 1         | 1         |
| Ift81_j3    | 1.27978   | 1.45447   | 0.184593      | 0.620135  | 0.850928  |
| Camkk2_j1   | 0.640938  | 1.13744   | 0             | 1         | 1         |
| Anapc5_j1   | 0.605632  | 1.33184   | 0             | 1         | 1         |
| Kdm2b_j11   | 0         | 0.283658  | 1.79769e+308  | 0.0002597 | 0.0047625 |
| Kdm2b_j12   | 0.137738  | 0         | -1.79769e+308 | 0.0001266 | 0.0026123 |
| Morn3       | 0.0909634 | 0.062686  | -0.537141     | 0.484297  | 1         |
| Al480526_j3 | 1.295     | 1.3676    | 0.0786897     | 0.742527  | 0.909932  |
| Diablo_j3   | 27.3244   | 32.204    | 0             | 1         | 1         |
| Diablo_j4   | 0.258738  | 0.517881  | 0             | 1         | 1         |
| Vps33a_j6   | 0.0539317 | 0.325137  | 0             | 1         | 1         |
| Clip1_j5    | 0.587552  | 0.906008  | 0             | 1         | 1         |
| Clip1_j6    | 1.56458   | 2.18147   | 0             | 1         | 1         |
| Zcchc8_j5   | 0.824498  | 0.572263  | 0             | 1         | 1         |
| Abcb9_j4    | 4.87583   | 5.66891   | 0             | 1         | 1         |
| Pitpnm2_j9  | 0.213304  | 0.391492  | 0             | 1         | 1         |
| Mphosph9    | 0.419242  | 0.977186  | 0             | 1         | 1         |
| Mphosph9_j5 | 0.194041  | 0.224946  | 0             | 1         | 1         |
| Mphosph9_j7 | 0.150164  | 0.147262  | 0             | 1         | 1         |
| Eif2b1_j1   | 2.31452   | 4.33009   | 0.903684      | 0.0023538 | 0.0284252 |
| Ccdc92_j4   | 155.729   | 182.559   | 0             | 1         | 1         |
| Ncor2_j2    | 0.864173  | 0         | -1.79769e+308 | 1.08E-27  | 3.49E-25  |
| Ncor2_j1    | 2.02146   | 2.6297    | 0.3795        | 0.0140712 | 0.109884  |
| Ncor2_j3    | 0.0296475 | 0.0871553 | 1.55568       | 0.0511012 | 1         |

|                  |            |           |              |           |           |
|------------------|------------|-----------|--------------|-----------|-----------|
| Ncor2_j4         | 2.49007    | 2.28757   | -0.12237     | 0.380086  | 0.711123  |
| XLOC_026131      | 0.024463   | 0.194157  | 2.98855      | 0.0247411 | 0.163074  |
| Slc15a4_j3       | 0.0425184  | 0.106872  | 0            | 1         | 1         |
| Tmem132d_j2      | 0.448112   | 0.651311  | 0.539488     | 0.0669142 | 0.309185  |
| 5930412G12Rik_j7 | 0          | 0.157302  | 1.79769e+308 | 0.0213598 | 0.147365  |
| XLOC_026135      | 0.00998551 | 0.13688   | 3.77693      | 0.200344  | 1         |
| Rimbp2_j8        | 0.0569622  | 7.26E-05  | 0            | 1         | 1         |
| Rimbp2_j7        | 0.955652   | 1.16664   | 0            | 1         | 1         |
| Stx2_j2          | 0.879699   | 0.717493  | 0            | 1         | 1         |
| Chchd2           | 6.42299    | 6.89724   | 0.102773     | 0.641863  | 0.861896  |
| Chchd2_j3        | 0          | 0.0651917 | 1.79769e+308 | 0.244003  | 1         |
| Asl_j1           | 9.77728    | 11.7302   | 0            | 1         | 1         |
| Wbscr17_j1       | 0          | 4.34189   | 0            | 1         | 1         |
| Wbscr17_j2       | 2.29257    | 1.94244   | 0            | 1         | 1         |
| Auts2_j14        | 0.535275   | 0.537043  | 0            | 1         | 1         |
| Wbscr16_j4       | 3.02059    | 3.34246   | 0.146084     | 0.575807  | 0.828497  |
| Gtf2i            | 2.96304    | 1.44261   | 0            | 1         | 1         |
| Gtf2ird1         | 0.0625509  | 0.0672496 | 0            | 1         | 1         |
| Clip2_j2         | 2.67113    | 7.15706   | 0            | 1         | 1         |
| Clip2_j3         | 1.25022    | 2.16204   | 0            | 1         | 1         |
| Clip2_j4         | 1.84845    | 3.1892    | 0            | 1         | 1         |
| Lat2             | 0.00386099 | 0.115652  | 4.90467      | 0.204141  | 1         |
| Eln_j1           | 0          | 0.116021  | 1.79769e+308 | 0.0061413 | 1         |
| Vps37d_j1        | 0.470972   | 0.755994  | 0.682735     | 0.194721  | 0.537138  |
| Orai2_j6         | 0          | 0.550204  | 1.79769e+308 | 0.0981637 | 0.387258  |
| Sh2b2_j4         | 0.0387916  | 0.0552229 | 0.509524     | 0.689563  | 1         |
| Cux1             | 3.17364    | 3.80952   | 0            | 1         | 1         |
| Emid2_j3         | 0          | 0.0937229 | 1.79769e+308 | 0.032988  | 1         |
| Srrt_j2          | 2.60341    | 2.96495   | 0            | 1         | 1         |
| Gnb2_j5          | 0.0229756  | 0.0647349 | 1.49444      | 0.164987  | 1         |
| Agfg2_j1         | 4.8283     | 4.33451   | 0            | 1         | 1         |
| Agfg2_j2         | 2.07851    | 2.85232   | 0            | 1         | 1         |
| Pilra            | 0.1754     | 0.114801  | -0.611511    | 0.514683  | 0.793796  |
| Cyp3a13_j4       | 0.0239766  | 0.144149  | 2.58786      | 0.0235677 | 1         |
| Zfp113_j1        | 0          | 0.058163  | 1.79769e+308 | 0.0255887 | 1         |
| Pdgfa_j7         | 1.16144    | 1.00205   | 0            | 1         | 1         |
| Prkar1b_j1       | 0          | 5.28158   | 0            | 1         | 1         |
| Prkar1b_j2       | 177.38     | 168.024   | 0            | 1         | 1         |
| 3110082I17Rik_j1 | 0          | 0.17943   | 0            | 1         | 1         |
| Micall2_j2       | 0          | 0.177019  | 1.79769e+308 | 0.0032659 | 0.0368898 |
| Ints1_j3         | 8.54708    | 9.46064   | 0            | 1         | 1         |
| Mad1l1_j1        | 0          | 0.649096  | 0            | 1         | 1         |
| Ftsj2_j1         | 4.42161    | 4.24971   | -0.0572061   | 0.761929  | 0.918069  |
| Snx8_j3          | 0.261957   | 0.906743  | 0            | 1         | 1         |
| Iqce_j5          | 2.39083    | 2.36416   | -0.0161846   | 0.922869  | 0.975936  |
| Card11_j11       | 0.136168   | 0.103122  | -0.401035    | 0.688208  | 1         |
| Radil_j1         | 1.82617    | 1.58062   | -0.208331    | 0.614279  | 0.847685  |

|              |           |            |              |           |           |
|--------------|-----------|------------|--------------|-----------|-----------|
| Rnf216_j3    | 0.346573  | 1.49645    | 0            | 1         | 1         |
| Rnf216_j4    | 0         | 0.226451   | 0            | 1         | 1         |
| Zfp316_j2    | 0.929468  | 0.219425   | -2.08267     | 0.0001137 | 0.0023994 |
| Zdhhc4_j2    | 2.50294   | 2.19137    | 0            | 1         | 1         |
| Zdhhc4_j3    | 1.20602   | 1.19538    | 0            | 1         | 1         |
| XLOC_026242  | 0.108961  | 0.265426   | 1.2845       | 0.0299793 | 0.185648  |
| XLOC_026242  | 0.186331  | 0.353421   | 0.923519     | 0.182064  | 0.522422  |
| Rac1_j2      | 60.1666   | 77.8006    | 0            | 1         | 1         |
| Rnf6_j1      | 0.248337  | 0.348174   | 0            | 1         | 1         |
| Usp12_j5     | 0.510013  | 0.360393   | 0            | 1         | 1         |
| Slc46a3_j1   | 0.589364  | 0.653678   | 0            | 1         | 1         |
| Katnal1_j1   | 0         | 2.00574    | 0            | 1         | 1         |
| Hsph1_j1     | 48.2495   | 47.0444    | 0            | 1         | 1         |
| Gm5_j1       | 0         | 0.355768   | 1.79769e+308 | 0.0130864 | 0.104567  |
| N4bp2l1_j2   | 2.30737   | 2.43555    | 0.0779961    | 0.762787  | 0.918318  |
| N4bp2l1_j3   | 1.85022   | 1.40305    | -0.399127    | 0.140535  | 0.466241  |
| N4bp2l1      | 1.40966   | 1.26337    | -0.158076    | 0.539546  | 0.808423  |
| N4bp2l2_j3   | 0.135234  | 0.188581   | 0.479728     | 0.347527  | 0.68613   |
| Stard13_j1   | 0.738408  | 0.522791   | 0            | 1         | 1         |
| Ccdc132      | 13.4842   | 12.4015    | -0.120756    | 0.245233  | 0.592667  |
| Gng11        | 5.1205    | 5.88907    | 0.201755     | 0.259182  | 0.607927  |
| XLOC_027557  | 0.18111   | 0.00903736 | -4.32482     | 0.0871498 | 0.361024  |
| XLOC_027557  | 0.0626703 | 0.0454235  | -0.464342    | 0.705012  | 1         |
| Col1a2_j1    | 2.33152   | 3.76732    | 0            | 1         | 1         |
| Col1a2_j5    | 1.64916   | 2.35648    | 0            | 1         | 1         |
| Casd1        | 6.8771    | 5.80787    | 0            | 1         | 1         |
| Peg10_j4     | 0.746675  | 0.305026   | -1.29155     | 2.39E-05  | 0.0006398 |
| Neurabin_j4  | 0.342966  | 0.0394699  | 0            | 1         | 1         |
| Neurabin_j11 | 0.30598   | 0.395508   | 0            | 1         | 1         |
| Dync1i1      | 33.45     | 24.1915    | 0            | 1         | 1         |
| Dync1i1_j2   | 6.22044   | 9.29315    | 0            | 1         | 1         |
| Acn9         | 4.64592   | 3.40769    | -0.447171    | 0.0004227 | 0.0070836 |
| Tac1         | 9.83013   | 5.80995    | -0.758685    | 1.48E-05  | 0.0004315 |
| Tac1_j7      | 39.1565   | 30.2154    | -0.37397     | 0.0014322 | 0.0190417 |
| C1galt1      | 3.09333   | 2.56171    | -0.272052    | 0.0514227 | 0.262881  |
| Mios         | 4.08631   | 3.73258    | -0.130627    | 0.2912    | 0.638466  |
| Glcci1_j3    | 0.884907  | 0.892345   | 0.0120765    | 0.968346  | 0.991049  |
| Glcci1_j4    | 3.16751   | 2.87699    | -0.138788    | 0.49042   | 0.779987  |
| Glcci1_j7    | 0.31789   | 0.205612   | -0.628605    | 0.520364  | 0.797861  |
| Glcci1_j9    | 0.0817116 | 0.117918   | 0            | 1         | 1         |
| Nxph1        | 0.882021  | 0.733749   | -0.265526    | 0.344886  | 0.684393  |
| Phf14_j1     | 1.74641   | 1.82366    | 0.0624428    | 0.829163  | 0.944887  |
| Phf14_j2     | 0.320668  | 0.316013   | -0.0210962   | 0.972494  | 0.991962  |
| Phf14_j3     | 0.80642   | 0.892521   | 0.146353     | 0.611559  | 0.847019  |
| Tmem106b_j1  | 4.37097   | 5.00808    | 0            | 1         | 1         |
| Tmem106b     | 11.6322   | 9.87263    | 0            | 1         | 1         |
| AK003812     | 0.427424  | 0.398115   | -0.102483    | 0.733677  | 0.906044  |

|                  |           |                       |             |           |           |
|------------------|-----------|-----------------------|-------------|-----------|-----------|
| AK003812_j4      | 0.56798   | 0.396662              | -0.517932   | 0.324309  | 0.667432  |
| Mdfic            | 0.661118  | 0.819573              | 0           | 1         | 1         |
| Tes              | 3.51841   | 6.75037               | 0.940042    | 3.81E-12  | 4.95E-10  |
| Cav2             | 15.7677   | 15.3311               | -0.0405069  | 0.677273  | 0.878715  |
| Cav1             | 8.38882   | 7.75348               | 0           | 1         | 1         |
| Met_j4           | 0.210388  | 0.259376              | 0.301993    | 0.573954  | 0.827829  |
| Capza2           | 88.0224   | 85.4018               | -0.0436039  | 0.611642  | 0.847062  |
| St7              | 0.786227  | 1.04805               | 0.41469     | 0.226474  | 0.573564  |
| Naa38            | 4.41553   | 4.39677               | -0.00614419 | 0.966697  | 0.990479  |
| Ing3             | 1.54031   | 1.46198               | -0.0752956  | 0.705722  | 0.892389  |
| A430107013Rik_j6 | 0.0969658 | 0 -1.79769e+308       |             | 0.0041852 | 1         |
| Wnt16            | 0.531952  | 0.841898              | 0.662351    | 0.0055138 | 0.0546657 |
| XLOC_027589      | 0.085839  | 0.0698416             | -0.297546   | 0.755256  | 1         |
| Ptprz1           | 1.98463   | 0.904204              | 0           | 1         | 1         |
| Ptprz1           | 2.03821   | 1.48126               | 0           | 1         | 1         |
| Ptprz1_j6        | 6.06931   | 5.96801               | 0           | 1         | 1         |
| 6530409C15Rik_j1 | 0.132522  | 0 -1.79769e+308       |             | 7.95E-05  | 1         |
| Arf5             | 6.0817    | 6.30171               | 0.051269    | 0.654923  | 0.868236  |
| Snd1_j1          | 6.08348   | 7.75308               | 0           | 1         | 1         |
| Snd1             | 9.49757   | 7.63314               | 0           | 1         | 1         |
| Snd1_j2          | 3.98016   | 5.5916                | 0           | 1         | 1         |
| Snd1_j5          | 1.08184   | 0                     | 0           | 1         | 1         |
| Gm3294           | 0.137377  | 0.12292               | -0.160424   | 0.874748  | 0.960191  |
| Gm3294_j3        | 0.113443  | 0 -1.79769e+308       |             | 0.0277323 | 1         |
| 2310016C08Rik    | 4.06317   | 4.36465               | 0.103263    | 0.579448  | 0.830922  |
| Calu             | 14.2765   | 15.3212               | 0           | 1         | 1         |
| Calu             | 21.1636   | 19.6109               | 0           | 1         | 1         |
| Ccdc136_j4       | 0.445577  | 0.550974              | 0           | 1         | 1         |
| Ccdc136_j3       | 14.9946   | 14.7012               | 0           | 1         | 1         |
| Ccdc136_j1       | 5.9902    | 6.09883               | 0           | 1         | 1         |
| Ccdc136_j2       | 5.22836   | 5.762                 | 0           | 1         | 1         |
| Ccdc136_j5       | 3.68616   | 4.53879               | 0           | 1         | 1         |
| Finc             | 0.514592  | 1.45475               | 1.49927     | 0         | 0         |
| Atp6v1f          | 126.869   | 128.587               | 0.0194046   | 0.834579  | 0.946855  |
| Irf5             | 2.17035   | 2.49597               | 0.201672    | 0.299717  | 0.64635   |
| Irf5_j1          | 0.0953737 | 0.238624              | 1.32308     | 0.116875  | 0.425121  |
| Tspan33          | 1.21352   | 0.805378              | -0.591463   | 0.0384153 | 0.218048  |
| Tspan33          | 0.183641  | 0.293364              | 0.675802    | 0.309752  | 0.654331  |
| Smo              | 1.19299   | 1.24314               | 0.0594133   | 0.7918    | 0.930476  |
| Ahcyl2_j1        | 0.529113  | 0.149744              | 0           | 1         | 1         |
| Ahcyl2_j3        | 1.41938   | 0.187886              | 0           | 1         | 1         |
| Fam40b           | 1.39846   | 1.05012               | -0.413282   | 0.028808  | 0.180714  |
| Nrf1             | 0         | 0.184917 1.79769e+308 |             | 0.0062078 | 0.0601524 |
| Klhdc10          | 5.39967   | 3.50551               | 0           | 1         | 1         |
| Klhdc10          | 2.92658   | 3.24604               | 0           | 1         | 1         |
| 1700025E21Rik    | 0.135237  | 0.0923628             | -0.550109   | 0.47672   | 1         |
| Mest             | 14.1095   | 10.9802               | 0           | 1         | 1         |

|                |           |           |               |           |           |
|----------------|-----------|-----------|---------------|-----------|-----------|
| Gm13844_j1     | 0.247236  | 0.175798  | 0             | 1         | 1         |
| Mkln1          | 3.7358    | 3.01352   | 0             | 1         | 1         |
| AK080631_j2    | 0.111989  | 0.076686  | -0.546321     | 0.537186  | 1         |
| AK080631       | 0.388448  | 0.190612  | -1.02708      | 0.0556854 | 0.275839  |
| XLOC_027620    | 0.211915  | 0.110543  | -0.938874     | 0.116486  | 0.424494  |
| Exoc4          | 14.1706   | 13.911    | 0             | 1         | 1         |
| Exoc4_j2       | 4.51478   | 2.18313   | 0             | 1         | 1         |
| Lrguk_j2       | 0.515902  | 0.10803   | -2.25566      | 2.30E-09  | 1.81E-07  |
| Akr1b8_j1      | 0.324061  | 0.238128  | -0.444528     | 0.52542   | 0.800757  |
| Akr1b10        | 2.03916   | 1.81923   | -0.164644     | 0.404697  | 0.726779  |
| Bpgm           | 9.18712   | 8.51238   | -0.110051     | 0.384212  | 0.71322   |
| Cald1_j1       | 1.60319   | 1.57583   | 0             | 1         | 1         |
| Cald1          | 2.59371   | 2.9336    | 0             | 1         | 1         |
| Agbl3          | 1.08695   | 0.823584  | -0.400293     | 0.225262  | 0.57244   |
| XLOC_027632    | 0.296783  | 0.07896   | -1.91021      | 0.0503243 | 0.259388  |
| 1810058I24Rik  | 8.22228   | 7.62876   | 0             | 1         | 1         |
| 1810058I24Rik  | 12.43     | 12.5873   | 0             | 1         | 1         |
| XLOC_027634    | 0.168623  | 0.0773233 | 0             | 1         | 1         |
| Chrm2          | 0.649094  | 0.358258  | -0.857429     | 0.0050463 | 0.0510589 |
| Chrm2_j2       | 2.46757   | 1.56677   | -0.655303     | 8.55E-05  | 0.0018747 |
| Atp6v0c        | 453.197   | 511.586   | 0.174839      | 0.045309  | 0.243693  |
| Trim24         | 1.65929   | 1.58878   | -0.0626453    | 0.743719  | 0.910328  |
| Trim24_j1      | 0.121957  | 0         | -1.79769e+308 | 1.13E-05  | 1         |
| Trim24_j4      | 0.0701059 | 0.184579  | 1.39663       | 0.322941  | 0.666015  |
| Ttc26          | 0.317513  | 0.190208  | -0.739235     | 0.055684  | 0.275839  |
| Ubn2_j1        | 0.208509  | 0.145119  | -0.522871     | 0.264931  | 0.613821  |
| 1110001J03Rik  | 12.2408   | 13.2694   | 0.116406      | 0.478221  | 0.772859  |
| Luc7l2_j1      | 0.754086  | 0.0485033 | 0             | 1         | 1         |
| Luc7l2_j1      | 0.220987  | 0         | 0             | 1         | 1         |
| Luc7l2         | 3.24496   | 3.63938   | 0             | 1         | 1         |
| Luc7l2_j8      | 0.383123  | 0.334458  | 0             | 1         | 1         |
| Clec2l         | 23.6001   | 11.4867   | -1.03883      | 1.14E-13  | 1.87E-11  |
| Clec2l_j2      | 12.4849   | 6.54236   | -0.932306     | 0.0005847 | 0.0092745 |
| Tbxas1         | 0.239814  | 0.450279  | 0.908905      | 0.0359344 | 0.209112  |
| Rab19_j1       | 0.117726  | 0.104201  | -0.176061     | 0.820696  | 1         |
| AK047163       | 0.305264  | 0.248506  | 0             | 1         | 1         |
| AK047163_j1    | 0.0883955 | 0.182604  | 0             | 1         | 1         |
| Adck2_j2       | 4.82452   | 4.20076   | 0             | 1         | 1         |
| Ndufb2         | 2.30566   | 2.0925    | 0             | 1         | 1         |
| Gm5567_j1      | 1.36204   | 1.01874   | 0             | 1         | 1         |
| Gm5567_j2      | 4.72369   | 2.98852   | 0             | 1         | 1         |
| Agk_j2         | 0.200448  | 0.0358407 | -2.48356      | 0.148284  | 0.477198  |
| Agk_j6         | 2.06927   | 1.70524   | -0.279145     | 0.68418   | 0.881956  |
| Ssbp1          | 1.56761   | 1.53254   | -0.0326411    | 0.929914  | 0.978572  |
| Ssbp1          | 0.836992  | 0.643892  | -0.378396     | 0.0927688 | 0.374764  |
| H4             | 0.0992959 | 0.119362  | 0.265533      | 0.761904  | 1         |
| TCR-beta chain | 0.0570736 | 0.0959065 | 0.748806      | 0.632064  | 1         |



|                  |           |                 |            |           |           |
|------------------|-----------|-----------------|------------|-----------|-----------|
| Ephb6            | 6.00371   | 5.29029         | -0.182509  | 0.147774  | 0.476408  |
| Ephb6_j4         | 4.14891   | 5.15337         | 0.312783   | 0.131371  | 0.45126   |
| Gstk1            | 6.15314   | 6.39141         | 0.0548121  | 0.739346  | 0.908509  |
| Casp2            | 0.593253  | 0.472251        | 0          | 1         | 1         |
| Zyx_j5           | 0.319551  | 0.907959        | 0          | 1         | 1         |
| Zyx_j6           | 7.29326   | 9.53659         | 0          | 1         | 1         |
| Cul1_j2          | 0.239703  | 0 -1.79769e+308 |            | 1.43E-05  | 0.0004206 |
| Cul1_j4          | 33.9028   | 34.7107         | 0.033975   | 0.702963  | 0.891214  |
| Zfp282_j2        | 1.03067   | 1.15232         | 0.160954   | 0.226752  | 0.573866  |
| Zfp282_j3        | 0.0807244 | 0.0216104       | -1.90128   | 0.0080053 | 1         |
| XLOC_027668      | 0.198842  | 0.0650076       | -1.61294   | 0.177585  | 0.516963  |
| mKIAA4190_j6     | 0.362481  | 0.375691        | 0.0516396  | 0.876763  | 0.960797  |
| mKIAA4190_j8     | 0.26167   | 0.228701        | -0.194285  | 0.656532  | 0.868997  |
| AI894139_j1      | 2.06266   | 1.87419         | -0.138241  | 0.554212  | 0.817429  |
| Krba1            | 0.501918  | 0.48489         | -0.0497957 | 0.866754  | 0.957821  |
| Krba1_j6         | 1.04714   | 0.730813        | -0.518885  | 0.0300899 | 0.186073  |
| Sspo_j4          | 0.14722   | 0.076601        | -0.942539  | 0.212246  | 0.557248  |
| Sspo_j17         | 0.369414  | 0.0964965       | -1.93669   | 0.0084675 | 0.0757087 |
| Sspo_j21         | 0.382206  | 0.213781        | -0.838214  | 0.0476184 | 0.250615  |
| Atp6v0e2         | 13.9776   | 13.1846         | -0.0842633 | 0.377562  | 0.709339  |
| Lrrc61           | 1.05226   | 1.08467         | 0          | 1         | 1         |
| Lrrc61           | 0.94752   | 0.943418        | 0          | 1         | 1         |
| Repin1           | 4.0266    | 4.53373         | 0.171136   | 0.25124   | 0.599096  |
| Repin1           | 0.312571  | 0.260598        | -0.262358  | 0.621001  | 0.851431  |
| Repin1           | 0.229139  | 0.277065        | 0.274      | 0.537509  | 0.807644  |
| Repin1           | 0.338005  | 0.326795        | -0.0486569 | 0.909721  | 0.971495  |
| Zfp775_j1        | 2.42687   | 2.65501         | 0.12962    | 0.447649  | 0.754418  |
| AI854703_j6      | 1.94748   | 0.545126        | -1.83694   | 2.29E-06  | 8.56E-05  |
| AI854703_j8      | 0.981304  | 0.842011        | -0.220862  | 0.466778  | 0.766337  |
| Gimap8           | 0.249791  | 0.0884519       | -1.49776   | 0.0462827 | 0.24659   |
| Gimap4           | 1.41602   | 1.30833         | -0.114111  | 0.631853  | 0.856815  |
| Gimap1_j1        | 0.0733171 | 0.0608689       | -0.268445  | 0.841322  | 1         |
| Gimap1           | 0.278744  | 0.390653        | 0.486946   | 0.348236  | 0.686627  |
| Gimap1_j3        | 0.169461  | 0 -1.79769e+308 |            | 0.0013948 | 0.0186619 |
| Gimap5           | 0.195019  | 0.0962858       | -1.01822   | 0.107638  | 0.407857  |
| Tmem176a_j2      | 6.74427   | 7.87234         | 0          | 1         | 1         |
| Tmem176a_j5      | 0.305411  | 0.291794        | 0          | 1         | 1         |
| Gpnmb            | 1.37799   | 1.64358         | 0.254271   | 0.213357  | 0.55853   |
| 2410003K15Rik_j6 | 9.81221   | 9.38266         | -0.0645811 | 0.709818  | 0.894313  |
| Ccdc126          | 7.45164   | 5.07239         | -0.554893  | 7.28E-05  | 0.0016377 |
| D330028D13Rik    | 0.637403  | 0.364937        | -0.804559  | 0.0411282 | 0.228002  |
| D330028D13Rik_j1 | 0.208813  | 0.132548        | -0.655695  | 0.394173  | 0.719811  |
| Npy              | 4.45436   | 48.1953         | 0          | 1         | 1         |
| Npy_j1           | 5.39902   | 53.7174         | 0          | 1         | 1         |
| Mpp6             | 1.78515   | 2.09068         | 0.227923   | 0.117078  | 0.425436  |
| AK043004_j4      | 0.396945  | 0.125801        | -1.65779   | 0.0821738 | 0.349198  |
| AK043004_j8      | 0.218589  | 0.120935        | -0.85399   | 0.320485  | 0.663744  |

|                  |           |                 |              |           |           |
|------------------|-----------|-----------------|--------------|-----------|-----------|
| AK043004_j1      | 0         | 0.0892845       | 1.79769e+308 | 0.0645754 | 1         |
| Snx10            | 44.1322   | 46.0993         |              | 0 1       | 1         |
| Snx10_j2         | 0.620766  | 0.168328        |              | 0 1       | 1         |
| Snx10_j3         | 7.30884   | 10.3173         |              | 0 1       | 1         |
| Tax1bp1          | 7.21262   | 6.83479         |              | 0 1       | 1         |
| Tax1bp1_j3       | 20.6931   | 15.4563         |              | 0 1       | 1         |
| Creb5            | 0.572603  | 0.239559        |              | 0 1       | 1         |
| Creb5_j2         | 0.0680433 | 1.37E-05        |              | 0 1       | 1         |
| Chn2             | 2.45515   | 1.75791         |              | 0 1       | 1         |
| Prr15            | 0.553902  | 1.81335         | 1.71096      | 2.11E-10  | 1.99E-08  |
| Wipf3_j1         | 12.1968   | 7.94119         | 0            | 1         | 1         |
| Plekha8_j1       | 0.279951  | 0.108562        | -1.36665     | 0.265388  | 0.614264  |
| 2410066E13Rik_j2 | 26.3631   | 35.1868         | 0            | 1         | 1         |
| Znrf2            | 3.73484   | 3.36414         | -0.150808    | 0.15301   | 0.48502   |
| Fam188b          | 0.603326  | 0.663761        | 0.137727     | 0.588417  | 0.835489  |
| Aqp1             | 64.7539   | 66.3464         | 0            | 1         | 1         |
| XLOC_027712      | 0.215498  | 0.19073         | -0.17614     | 0.834889  | 0.946943  |
| XLOC_027712      | 0.144373  | 0.138371        | -0.0612637   | 0.942205  | 0.982426  |
| Avl9             | 4.48209   | 3.75016         | 0            | 1         | 1         |
| Avl9_j1          | 3.50063   | 4.05994         | 0            | 1         | 1         |
| Fkbp9            | 13.0216   | 11.8535         | -0.135592    | 0.189156  | 0.530721  |
| Herc6            | 0.790135  | 0.714347        | -0.145475    | 0.505095  | 0.788062  |
| Lancl2           | 2.87137   | 2.85687         | 0            | 1         | 1         |
| Lancl2_j3        | 4.76326   | 3.95362         | 0            | 1         | 1         |
| Rps15-ps2        | 125.151   | 150.002         | 0.261313     | 0.0052172 | 0.0523677 |
| Abcg2_j2         | 17.0152   | 20.0044         | 0            | 1         | 1         |
| Tigd2            | 4.18532   | 3.78387         | -0.145474    | 0.294768  | 0.641359  |
| Fam190a_j1       | 0.0629993 | 0 -1.79769e+308 |              | 0.0171066 | 1         |
| Grid2            | 0.134022  | 0.166826        | 0.315875     | 0.736708  | 0.907294  |
| XLOC_027723      | 0.372707  | 0.428476        | 0.201173     | 0.491773  | 0.780599  |
| Smarcad1_j1      | 1.59696   | 1.30807         | 0            | 1         | 1         |
| Smarcad1         | 0.915324  | 1.10379         | 0            | 1         | 1         |
| C130060K24Rik_j2 | 0.198117  | 0.0350505       | -2.49884     | 0.0566364 | 0.278405  |
| A930038C07Rik    | 0.863801  | 0.637816        | -0.43756     | 0.0229076 | 0.154736  |
| Prdm5            | 0.445183  | 0.310877        | -0.518057    | 0.368095  | 0.701481  |
| Prdm5_j9         | 0.149754  | 0.0575417       | -1.37991     | 0.247723  | 0.595075  |
| Prdm5_j13        | 0.243301  | 0.117874        | -1.0455      | 0.315547  | 0.659615  |
| Prdm5_j14        | 0.570481  | 0.223439        | -1.3523      | 0.239864  | 0.587219  |
| Mad2l1           | 1.53327   | 1.10186         | -0.476671    | 0.175349  | 0.51373   |
| Mad2l1           | 1.29562   | 1.26762         | -0.0315172   | 0.91392   | 0.972962  |
| Mad2l1_j3        | 0.248797  | 0.0981813       | -1.34145     | 0.289101  | 0.63673   |
| Gng12            | 3.85823   | 4.14385         | 0            | 1         | 1         |
| Gng12            | 2.95905   | 2.07073         | 0            | 1         | 1         |
| Gm8566           | 278.392   | 282.026         | 0.0187106    | 0.829391  | 0.944941  |
| Serbp1           | 2.12605   | 2.11057         | 0            | 1         | 1         |
| Serbp1           | 2.67487   | 2.66006         | 0            | 1         | 1         |
| Serbp1           | 2.10898   | 2.14965         | 0            | 1         | 1         |

|                  |           |           |            |           |           |
|------------------|-----------|-----------|------------|-----------|-----------|
| Serbp1           | 1.49129   | 1.58488   | 0          | 1         | 1         |
| abParts_j3       | 0.135237  | 0.58868   | 2.122      | 0.0858938 | 0.357767  |
| Eif2ak3          | 11.2826   | 12.8539   | 0.188115   | 0.05141   | 0.262862  |
| Krcc1            | 1.64247   | 1.83289   | 0.158251   | 0.419783  | 0.736395  |
| Rnf103           | 11.3194   | 10.3055   | 0          | 1         | 1         |
| Vps24_j3         | 15.7402   | 14.1095   | 0          | 1         | 1         |
| Vps24            | 20.1639   | 16.4031   | 0          | 1         | 1         |
| Reep1            | 157.329   | 173.924   | 0          | 1         | 1         |
| Immt             | 11.7531   | 12.3326   | 0          | 1         | 1         |
| Immt_j9          | 5.76585   | 6.32012   | 0          | 1         | 1         |
| Immt_j8          | 13.5209   | 15.1236   | 0          | 1         | 1         |
| Immt             | 20.5169   | 19.3262   | 0          | 1         | 1         |
| Polr1a_j1        | 0.606414  | 0.591531  | 0          | 1         | 1         |
| St3gal5          | 15.2172   | 12.1063   | -0.329948  | 0.0027316 | 0.0320372 |
| 0610030E20Rik_j4 | 0.14612   | 0.160379  | 0          | 1         | 1         |
| Tmem150a_j1      | 2.15869   | 2.96876   | 0          | 1         | 1         |
| Ggcx             | 2.02912   | 2.04708   | 0.0127141  | 0.916745  | 0.97399   |
| Capg_j1          | 4.83889   | 3.04459   | 0          | 1         | 1         |
| Capg             | 3.91055   | 2.81938   | 0          | 1         | 1         |
| Capg             | 4.55693   | 6.02488   | 0          | 1         | 1         |
| Capg_j2          | 0.210689  | 0.327574  | 0          | 1         | 1         |
| Suclg1           | 6.68471   | 6.46536   | -0.0481329 | 0.770862  | 0.922116  |
| Lrrtm1_j2        | 0.780675  | 0.435795  | 0          | 1         | 1         |
| Lrrtm1_j5        | 1.96661   | 1.0866    | 0          | 1         | 1         |
| Lrrtm4_j2        | 0.11838   | 0.0778825 | -0.604057  | 0.467018  | 1         |
| Lrrtm4           | 0.306499  | 0.310703  | 0.0196527  | 0.959546  | 0.988456  |
| Fam176a          | 0.480443  | 0.471141  | -0.0282064 | 0.935251  | 0.980235  |
| Dqx1_j1          | 1.13505   | 0.453673  | -1.32303   | 0.0005647 | 0.0090242 |
| Pcgf1_j1         | 4.46368   | 4.29093   | -0.0569412 | 0.674546  | 0.877234  |
| Ccdc142_j2       | 2.11726   | 2.06007   | -0.0395078 | 0.848046  | 0.951888  |
| Ccdc142_j5       | 27.6674   | 30.6193   | 0.146252   | 0.318178  | 0.661603  |
| Mogs             | 2.39663   | 2.60773   | 0          | 1         | 1         |
| Rtkn_j1          | 7.72124   | 8.91214   | 0          | 1         | 1         |
| Rtkn_j4          | 0.375872  | 0.109396  | 0          | 1         | 1         |
| Rtkn_j6          | 2.7054    | 2.52146   | 0          | 1         | 1         |
| Dctn1_j2         | 1.59212   | 0.745563  | 0          | 1         | 1         |
| Dctn1            | 28.7344   | 18.4952   | 0          | 1         | 1         |
| Dctn1_j8         | 46.1824   | 46.5481   | 0          | 1         | 1         |
| Dctn1_j9         | 0.401961  | 1.51285   | 0          | 1         | 1         |
| Mobkl1b          | 2.13618   | 2.08129   | 0          | 1         | 1         |
| Bola3            | 5.54707   | 3.92704   | -0.498284  | 0.0005168 | 0.0083685 |
| B230319C09Rik    | 0.0615357 | 0.0413802 | 0          | 1         | 1         |
| B230319C09Rik_j1 | 0.278466  | 0.0929115 | 0          | 1         | 1         |
| XLOC_027769      | 0.14029   | 0.0607504 | -1.20745   | 0.287671  | 0.63577   |
| Nagk             | 6.20617   | 7.64214   | 0          | 1         | 1         |
| Nagk             | 15.1513   | 16.9891   | 0          | 1         | 1         |
| Nagk_j3          | 3.23781   | 0         | 0          | 1         | 1         |

|               |           |            |               |           |           |
|---------------|-----------|------------|---------------|-----------|-----------|
| Zfml_j1       | 0.381044  | 0.194128   | 0             | 1         | 1         |
| Zfml_j4       | 0.338695  | 0.179834   | 0             | 1         | 1         |
| Dysf_j1       | 5.73708   | 6.51741    | 0             | 1         | 1         |
| Dysf_j2       | 1.20555   | 0.982993   | 0             | 1         | 1         |
| Dysf_j6       | 16.9827   | 22.7496    | 0             | 1         | 1         |
| Cct7          | 9.29163   | 10.4788    | 0.173471      | 0.150883  | 0.481595  |
| Cct7_j1       | 0.156831  | 0          | -1.79769e+308 | 0.0116567 | 0.0959493 |
| Alms1_j1      | 0.0494933 | 0.0910747  | 0.879815      | 0.189348  | 1         |
| Alms1_j2      | 0.0916198 | 0.00103188 | -6.47231      | 0.226362  | 1         |
| Alms1_j8      | 0.2999    | 0.470879   | 0.650877      | 0.10394   | 0.399846  |
| Tgfa          | 1.97629   | 2.75998    | 0.481862      | 0.0021247 | 0.0262016 |
| Gm10443       | 123.715   | 146.441    | 0.243301      | 0.022309  | 0.152084  |
| Fam136a_j4    | 0.0746764 | 0.28828    | 0             | 1         | 1         |
| Fam136a_j3    | 0.368446  | 0.206233   | 0             | 1         | 1         |
| Snrpg_j1      | 0.682363  | 0.655748   | -0.0573985    | 0.930852  | 0.978859  |
| Tia1          | 1.23218   | 1.26376    | 0             | 1         | 1         |
| Tia1_j9       | 0.0839721 | 0.0698003  | 0             | 1         | 1         |
| C87436_j5     | 1.14055   | 1.22931    | 0             | 1         | 1         |
| Aak1          | 6.67628   | 5.57633    | 0             | 1         | 1         |
| Nfu1          | 0.512974  | 0.269621   | 0             | 1         | 1         |
| Gfpt1         | 5.332     | 4.34644    | 0             | 1         | 1         |
| Gfpt1_j2      | 0.3383    | 0          | 0             | 1         | 1         |
| XLOC_027791   | 0.193258  | 0.181773   | -0.0883901    | 0.881861  | 0.962574  |
| Copg_j1       | 50.162    | 48.8494    | 0             | 1         | 1         |
| Copg_j7       | 11.8978   | 15.8031    | 0             | 1         | 1         |
| 8430410A17Rik | 3.93456   | 3.9233     | -0.00413532   | 0.982873  | 0.994754  |
| Rpn1          | 45.6461   | 51.19      | 0.16537       | 0.0615765 | 0.293265  |
| Ruvbl1_j2     | 0.680725  | 0.470029   | -0.534323     | 0.514923  | 0.793837  |
| Mgl1          | 11.3833   | 12.3871    | 0             | 1         | 1         |
| Tpra1         | 5.48227   | 5.01314    | 0             | 1         | 1         |
| Txnrd3        | 4.2912    | 5.64224    | 0.394887      | 0.0048244 | 0.0493365 |
| Zxdc_j1       | 0.506566  | 0.308157   | -0.717083     | 0.0963111 | 0.383159  |
| Zxdc          | 1.34286   | 1.20484    | -0.156467     | 0.426276  | 0.741011  |
| Klf15         | 1.45861   | 1.10932    | -0.394918     | 0.123024  | 0.436624  |
| Klf15_j2      | 0.105037  | 0.110689   | 0.0756069     | 0.910989  | 1         |
| Aldh1l1       | 1.34901   | 1.67899    | 0             | 1         | 1         |
| Aldh1l1       | 1.06726   | 3.30024    | 0             | 1         | 1         |
| Aldh1l1_j2    | 0.441626  | 1.07519    | 0             | 1         | 1         |
| Slc41a3       | 10.603    | 12.7158    | 0.262154      | 0.018122  | 0.131663  |
| Hdac11        | 30.6224   | 23.7117    | -0.36899      | 0.000121  | 0.0025193 |
| Fbln2         | 19.8919   | 17.8616    | 0             | 1         | 1         |
| Fbln2_j4      | 4.27787   | 5.619      | 0             | 1         | 1         |
| AK007770      | 0.526643  | 0.689397   | 0.388512      | 0.435236  | 0.746101  |
| Tmem43        | 7.21846   | 11.6606    | 0             | 1         | 1         |
| Lsm3          | 7.94901   | 8.32114    | 0             | 1         | 1         |
| Slc6a6        | 1.54859   | 1.4571     | 0             | 1         | 1         |
| Slc6a6_j5     | 0.497539  | 0.604205   | 0             | 1         | 1         |

|                  |             |                 |             |           |           |
|------------------|-------------|-----------------|-------------|-----------|-----------|
| C130022K22Rik    | 1.1129      | 1.26734         | 0.187479    | 0.242609  | 0.590089  |
| Fgd5             | 0.615685    | 0.490126        | -0.329039   | 0.174568  | 0.512657  |
| Fgd5_j4          | 0.191491    | 0.203647        | 0.0887938   | 0.906602  | 0.970402  |
| AK043032_j3      | 0.276442    | 0.0488643       | -2.50012    | 0.271573  | 0.620436  |
| 9530026P05Rik_j4 | 0.422345    | 0 -1.79769e+308 |             | 9.29E-17  | 2.35E-14  |
| Slc25a26_j1      | 1.19013     | 1.32846         | 0.158636    | 0.508982  | 0.790628  |
| Slc25a26         | 3.43204     | 3.32398         | -0.0461549  | 0.76442   | 0.919203  |
| Kbtbd8           | 0.409683    | 0.384419        | 0           | 1         | 1         |
| Kbtbd8           | 0.360496    | 0.292266        | 0           | 1         | 1         |
| Fam19a1_j1       | 0.167125    | 0.141338        | -0.241776   | 0.838162  | 0.948399  |
| Fam19a1_j3       | 7.34581     | 6.76399         | -0.119047   | 0.358176  | 0.693687  |
| Arl6ip5          | 4.47788     | 5.09649         | 0.186689    | 0.344807  | 0.684393  |
| XLOC_027827      | 0.156257    | 0.0378573       | -2.04528    | 0.127758  | 0.44538   |
| Ppp4r2_j2        | 1.18743     | 1.18574         | -0.00205665 | 0.99652   | 0.999083  |
| Ppp4r2_j4        | 0.156013    | 0.115145        | -0.438215   | 0.764703  | 0.919353  |
| Chl1_j1          | 5.06911     | 10.7109         | 0           | 1         | 1         |
| Chl1_j4          | 0.948638    | 2.39461         | 0           | 1         | 1         |
| Cntn6            | 1.36798     | 0.789193        | -0.793598   | 0.0006812 | 0.0105014 |
| Cntn4_j7         | 0.838665    | 0.261641        | -1.6805     | 0.0003395 | 0.0059119 |
| Lrrn1            | 8.1733      | 4.99819         | 0           | 1         | 1         |
| Lrrn1_j4         | 1.8794      | 0.0468511       | 0           | 1         | 1         |
| Setmar           | 2.85499     | 2.79119         | -0.0326037  | 0.857573  | 0.954849  |
| Itpr1_j2         | 0.0906977   | 0 -1.79769e+308 |             | 0.0015982 | 1         |
| Itpr1_j1         | 0.0783685   | 0.165015        | 1.07425     | 0.117974  | 0.42745   |
| Itpr1_j5         | 0.423699    | 0.254696        | 0           | 1         | 1         |
| Itpr1_j8         | 0.088952    | 0.0776809       | 0           | 1         | 1         |
| Itpr1_j10        | 1.48888     | 6.62499         | 0           | 1         | 1         |
| Bhlhe40          | 1.12364     | 1.06464         | 0           | 1         | 1         |
| Bhlhe40_j2       | 0.182589    | 0.0578881       | 0           | 1         | 1         |
| Bhlhe40_j3       | 2.19413     | 3.56649         | 0           | 1         | 1         |
| Arl8b            | 32.0728     | 27.5494         | 0           | 1         | 1         |
| Arl8b_j1         | 34.8366     | 35.9674         | 0           | 1         | 1         |
| Edem1            | 3.20806     | 3.16406         | 0           | 1         | 1         |
| Grm7             | 16.8222     | 16.9814         | 0.0135909   | 0.883683  | 0.963053  |
| Lmcd1            | 2.10485     | 1.07761         | -0.965885   | 0.000186  | 0.003613  |
| Gm16598_j1       | 0.0911138   | 0.181119        | 0.991195    | 0.103941  | 0.399846  |
| Thumpd3          | 12.815      | 9.08355         | 0           | 1         | 1         |
| Setd5_j8         | 2.56548     | 2.1606          | -0.247799   | 0.125608  | 0.441522  |
| Mtmr14           | 9.92221     | 10.0346         | 0.0162507   | 0.89585   | 0.96693   |
| Mtmr14_j1        | 1.68932     | 1.53678         | -0.136538   | 0.645572  | 0.863371  |
| Cpne9_j2         | 0.278756    | 0.168693        | -0.724599   | 0.230347  | 0.577338  |
| Cpne9_j1         | 0.145965    | 0.0870056       | -0.74644    | 0.380957  | 0.711636  |
| Cpne9            | 1.3196      | 1.41957         | 0.105349    | 0.626029  | 0.854009  |
| Brpf1_j2         | 0.000214937 | 0.129262        | 9.23217     | 0.616972  | 1         |
| Brpf1_j1         | 2.68737     | 2.47673         | -0.117755   | 0.4381    | 0.74793   |
| Ogg1             | 0.814836    | 1.62457         | 0           | 1         | 1         |
| Arc4_j1          | 11.3062     | 14.2624         | 0           | 1         | 1         |

|               |           |                 |            |           |           |
|---------------|-----------|-----------------|------------|-----------|-----------|
| Arpc4_j2      | 66.5794   | 75.8393         | 0          | 1         | 1         |
| Jagn1         | 19.1748   | 18.0433         | 0          | 1         | 1         |
| Jagn1         | 13.5603   | 12.4317         | 0          | 1         | 1         |
| Il17re_j2     | 0.0620249 | 0 -1.79769e+308 | 0.013115   |           | 1         |
| Il17rc_j2     | 1.24079   | 1.15331         | -0.105486  | 0.645169  | 0.863171  |
| Creld1_j3     | 57.4835   | 65.3434         | 0.184894   | 0.0461161 | 0.245998  |
| Fancd2_j10    | 0.114852  | 0 -1.79769e+308 | 0.0137434  |           | 1         |
| 6720456B07Rik | 6.90853   | 7.2844          | 0          | 1         | 1         |
| Vhl           | 6.45545   | 6.4647          | 0.00206718 | 0.98684   | 0.99622   |
| Irak2         | 0.775726  | 0.336338        | 0          | 1         | 1         |
| Tatdn2_j2     | 2.94517   | 3.33246         | 0          | 1         | 1         |
| Tatdn2        | 2.09738   | 2.1149          | 0          | 1         | 1         |
| Slc6a11       | 1.04957   | 0.342582        | -1.61527   | 3.98E-06  | 0.0001387 |
| Slc6a1        | 0.898806  | 0.735715        | -0.288864  | 0.241509  | 0.588601  |
| Slc6a1_j4     | 0.335445  | 0.527263        | 0.652444   | 0.153958  | 0.48684   |
| Hrh1_j1       | 0.232765  | 0.143784        | -0.694968  | 0.303218  | 0.64898   |
| Hrh1_j2       | 0.177721  | 0.0761187       | -1.22329   | 0.15411   | 0.487096  |
| Hrh1_j3       | 0.102494  | 0.0771315       | -0.410146  | 0.671759  | 1         |
| Atg7          | 1.06903   | 1.95309         | 0          | 1         | 1         |
| Syn2_j1       | 0.0786195 | 0 -1.79769e+308 | 0.0462677  |           | 1         |
| Syn2          | 1.10054   | 0.391828        | -1.48992   | 3.75E-05  | 0.0009343 |
| Pparg_j1      | 0.402661  | 0.440401        | 0.12925    | 0.767106  | 0.920598  |
| Tsen2_j1      | 0.748667  | 1.10555         | 0.562375   | 0.160093  | 0.49462   |
| Tsen2         | 0.702905  | 0.691048        | -0.0245439 | 0.896031  | 0.966989  |
| Mkrn2_j2      | 8.51769   | 8.95691         | 0          | 1         | 1         |
| Cand2_j3      | 0.930059  | 1.26986         | 0.449279   | 0.0092505 | 0.0808838 |
| Ift122        | 3.01005   | 1.35692         | 0          | 1         | 1         |
| mFLJ00025_j2  | 13.4522   | 16.0076         | 0          | 1         | 1         |
| Rho_j2        | 0.283363  | 0.124055        | 0          | 1         | 1         |
| Rho_j1        | 0.274497  | 0.201803        | 0          | 1         | 1         |
| Rho           | 0.2983    | 0.150108        | 0          | 1         | 1         |
| D6Wsu116e_j1  | 19.9952   | 20.2811         | 0.0204821  | 0.823893  | 0.943114  |
| Anubl1_j1     | 0.102846  | 0 -1.79769e+308 | 0.0013733  |           | 1         |
| Anubl1_j2     | 0.173674  | 0.0266163       | -2.706     | 0.0355134 | 0.207672  |
| March8_j5     | 0.0490089 | 0               | 0          | 1         | 1         |
| March8_j4     | 1.48992   | 1.9524          | 0          | 1         | 1         |
| March8        | 3.44956   | 3.28328         | 0          | 1         | 1         |
| March8_j8     | 0.0881824 | 0               | 0          | 1         | 1         |
| 8430408G22Rik | 0.223011  | 0.211847        | 0          | 1         | 1         |
| 8430408G22Rik | 1.48745   | 0.727628        | 0          | 1         | 1         |
| Cxcl12        | 3.80021   | 3.97846         | 0          | 1         | 1         |
| Zfp637        | 5.59182   | 5.49301         | -0.0257222 | 0.886511  | 0.964026  |
| Zfp637_j4     | 0.138715  | 0.185618        | 0.420211   | 0.631268  | 0.8565    |
| Zfp239        | 0.8141    | 0.505058        | -0.688757  | 0.0578871 | 0.28236   |
| Zfp239_j3     | 0.475719  | 0.490606        | 0.044455   | 0.917909  | 0.974435  |
| Rasgef1a      | 2.17587   | 0.914082        | -1.25119   | 2.64E-05  | 0.000694  |
| Dcp1b         | 0.11718   | 0.00418794      | -4.80635   | 0.0652379 | 1         |

|               |           |                       |            |           |           |
|---------------|-----------|-----------------------|------------|-----------|-----------|
| Dcp1b_j7      | 0.870686  | 1.25344               | 0.52567    | 0.159484  | 0.493951  |
| Dcp1b_j8      | 0.502978  | 0.666404              | 0.405901   | 0.139328  | 0.464195  |
| Fbxl14        | 4.69954   | 4.36087               | -0.107905  | 0.386592  | 0.714571  |
| Rad52_j12     | 0.268251  | 0.212762              | -0.334341  | 0.742352  | 0.909901  |
| Kdm5a_j1      | 0.0567402 | 0                     | 0          | 1         | 1         |
| Kdm5a         | 0.524194  | 0.345493              | 0          | 1         | 1         |
| Kdm5a_j8      | 0.277532  | 0.414823              | 0          | 1         | 1         |
| Il17ra        | 0.761032  | 1.09491               | 0          | 1         | 1         |
| Bcl2l13       | 3.23972   | 2.84847               | 0          | 1         | 1         |
| Pex26         | 0.94722   | 0.856965              | -0.144463  | 0.575176  | 0.828142  |
| Pex26         | 3.47089   | 3.17556               | -0.128293  | 0.371133  | 0.704108  |
| Tuba8         | 1.29831   | 0.734751              | -0.821307  | 0.0018669 | 0.0236541 |
| Tuba8_j1      | 0.173057  | 0.22383               | 0.371156   | 0.603199  | 0.843262  |
| Usp18_j1      | 0.316429  | 0.324248              | 0.0352176  | 0.945248  | 0.983703  |
| Usp18         | 0.8757    | 1.69484               | 0.952638   | 0.0001772 | 0.0034731 |
| A2m           | 2.9091    | 2.33953               | -0.31435   | 0.0295086 | 0.18369   |
| M6pr          | 18.6553   | 20.722                | 0          | 1         | 1         |
| M6pr_j2       | 14.5332   | 10.3173               | 0          | 1         | 1         |
| Mfap5_j1      | 0.195534  | 0 -1.79769e+308       | 0.0032195  | 0.0032195 | 0.0364931 |
| Mfap5         | 1.46673   | 2.68559               | 0.872641   | 3.10E-05  | 0.0007945 |
| Foxj2         | 2.69498   | 2.97835               | 0          | 1         | 1         |
| Necap1        | 74.4778   | 71.311                | -0.062687  | 0.469874  | 0.767871  |
| Clec4a1       | 0.476053  | 1.2815                | 1.42864    | 4.85E-06  | 0.0001644 |
| Clec4a3       | 0.293434  | 0.659695              | 1.16876    | 0.0175521 | 0.128616  |
| Clec4a2_j2    | 0.807212  | 0.833231              | 0.0457682  | 0.91883   | 0.974658  |
| Clec4a2       | 0         | 0.446327 1.79769e+308 | 0.0006385  | 0.0006385 | 0.0099691 |
| Clec4n        | 0.308352  | 0.868301              | 1.49362    | 0.0020868 | 0.0258543 |
| C1rl_j1       | 0.0871525 | 0.0271422             | -1.683     | 0.371733  | 1         |
| C1rb          | 0.217062  | 0.428914              | 0.982584   | 0.108342  | 0.409317  |
| Lpcat3        | 1.42813   | 1.39245               | -0.0365066 | 0.833362  | 0.946329  |
| Phb2_j1       | 30.0486   | 25.8622               | -0.216453  | 0.0310619 | 0.190042  |
| Mlf2          | 114.385   | 116.433               | 0          | 1         | 1         |
| Mlf2_j1       | 60.4793   | 57.1311               | 0          | 1         | 1         |
| C530028O21Rik | 0.196815  | 0.0118147             | 0          | 1         | 1         |
| XLOC_027929   | 0.23462   | 0.225067              | 0          | 1         | 1         |
| Zfp384_j2     | 3.62946   | 4.30459               | 0          | 1         | 1         |
| Zfp384_j5     | 1.06343   | 0.651284              | 0          | 1         | 1         |
| Zfp384        | 2.41262   | 2.83181               | 0          | 1         | 1         |
| Acrbp_j6      | 3.11267   | 3.86984               | 0.314121   | 0.0425253 | 0.233069  |
| Lpar5         | 0.388155  | 0.2775                | -0.484147  | 0.156055  | 0.489534  |
| Lpar5_j1      | 0.0794926 | 0.0401603             | -0.985049  | 0.231929  | 1         |
| Chd4_j3       | 17.9894   | 18.0848               | 0          | 1         | 1         |
| Chd4_j12      | 17.5864   | 19.559                | 0          | 1         | 1         |
| Nop2          | 4.43255   | 4.99847               | 0          | 1         | 1         |
| Iffo1_j2      | 2.24706   | 1.98953               | 0          | 1         | 1         |
| Iffo1_j3      | 4.0092    | 5.50764               | 0          | 1         | 1         |
| Iffo1         | 12.2131   | 10.4025               | 0          | 1         | 1         |

|               |           |                 |            |           |           |
|---------------|-----------|-----------------|------------|-----------|-----------|
| Iffo1_j5      | 0.922109  | 0.672317        | 0          | 1         | 1         |
| Mrpl51        | 5.2593    | 5.56057         | 0.0803626  | 0.468798  | 0.767193  |
| Vamp1         | 224.424   | 126.478         | -0.827348  | 0         | 0         |
| Scnn1a_j2     | 0.230579  | 0.182986        | -0.333533  | 0.526957  | 0.801327  |
| Tnfrsf1a      | 12.9592   | 15.2436         | 0.23423    | 0.034787  | 0.204875  |
| Vwf_j2        | 0.107185  | 0.0852669       | -0.330044  | 0.527737  | 1         |
| Ano2_j2       | 0.120833  | 0.142872        | 0.241717   | 0.720734  | 1         |
| Ano2_j3       | 0.0818636 | 0.0499771       | -0.711954  | 0.61836   | 1         |
| XLOC_027942   | 0.139915  | 0.0304118       | -2.20185   | 0.212278  | 0.557296  |
| Akap3_j1      | 0.089566  | 0.0458705       | -0.965384  | 0.33287   | 1         |
| D6Wsu163e     | 4.7185    | 4.17425         | -0.176811  | 0.340024  | 0.680118  |
| D6Wsu163e_j2  | 8.42621   | 8.81609         | 0.0652551  | 0.623962  | 0.853116  |
| Parp11_j3     | 0.998278  | 0.648508        | 0          | 1         | 1         |
| Parp11        | 3.1511    | 2.65103         | 0          | 1         | 1         |
| Parp11_j1     | 1.60614   | 1.62715         | 0          | 1         | 1         |
| Efcab4b_j2    | 0.480405  | 0.430307        | -0.158885  | 0.477845  | 0.77269   |
| XLOC_027948   | 0.137583  | 8.32E-05        | -10.6913   | 0.846587  | 0.951509  |
| Tspan11       | 0.14307   | 0 -1.79769e+308 |            | 3.37E-05  | 0.0008569 |
| Rpl18-ps2     | 56.9363   | 72.8453         | 0.355489   | 0.0003772 | 0.0064635 |
| Foxm1_j2      | 0.0468592 | 0 -1.79769e+308 |            | 0.000103  | 1         |
| Foxm1_j1      | 0.0656213 | 0.0439681       | -0.577708  | 0.357746  | 1         |
| Nrip2_j1      | 3.09247   | 2.61953         | 0          | 1         | 1         |
| Nrip2         | 3.51136   | 3.71377         | 0          | 1         | 1         |
| Gm10069_j3    | 0.834272  | 1.27886         | 0          | 1         | 1         |
| BC064078      | 0.446357  | 0.270777        | -0.721093  | 0.0731607 | 0.325694  |
| Clec12a       | 0.582484  | 1.14176         | 0.970976   | 0.0014467 | 0.0191685 |
| Gabarapl1     | 62.0475   | 67.0099         | 0.111      | 0.206691  | 0.551333  |
| Gabarapl1_j3  | 328.743   | 375.989         | 0.193729   | 0.0274538 | 0.175242  |
| 2700089E24Rik | 7.39173   | 6.2632          | 0          | 1         | 1         |
| XLOC_027968   | 0.186267  | 0.251624        | 0          | 1         | 1         |
| Etv6          | 2.9779    | 3.57687         | 0          | 1         | 1         |
| Etv6          | 0.346992  | 0.458629        | 0          | 1         | 1         |
| Bcl2l14       | 2.21813   | 2.23009         | 0.00775819 | 0.965553  | 0.990085  |
| Bcl2l14_j1    | 0.0612723 | 0 -1.79769e+308 |            | 0.0336766 | 1         |
| Loh12cr1      | 11.4326   | 12.3714         | 0.113856   | 0.381724  | 0.71203   |
| Crebl2        | 0.551726  | 0.399944        | 0          | 1         | 1         |
| Cdkn1b        | 15.9137   | 15.3883         | -0.048435  | 0.655156  | 0.868251  |
| Apold1        | 0.383839  | 0.32366         | -0.246022  | 0.39692   | 0.721348  |
| Ddx47         | 22.5211   | 22.1579         | -0.0234554 | 0.82086   | 0.942034  |
| Gprc5a_j1     | 0.109016  | 0.0474472       | -1.20014   | 0.309448  | 1         |
| 8430419L09Rik | 10.4652   | 5.87089         | 0          | 1         | 1         |
| Emp1          | 1.40759   | 2.34578         | 0.736843   | 4.37E-05  | 0.0010629 |
| Atf7ip        | 3.52887   | 2.71794         | 0          | 1         | 1         |
| H2afj         | 4.73518   | 6.21751         | 0.392916   | 0.0089729 | 0.0788954 |
| Ptpro         | 1.04085   | 1.44221         | 0.470516   | 0.0190216 | 0.136169  |
| Ptpro_j2      | 0.082248  | 0 -1.79769e+308 |            | 0.000986  | 1         |
| Ptpro_j3      | 0.28695   | 0 -1.79769e+308 |            | 3.95E-06  | 0.0001377 |



|                  |           |            |               |           |           |
|------------------|-----------|------------|---------------|-----------|-----------|
| Strap_j2         | 28.4188   | 27.0335    | -0.0720992    | 0.538808  | 0.808163  |
| Strap_j3         | 2.15222   | 2.68135    | 0.317134      | 0.0352181 | 0.206565  |
| Mgst1            | 6.48445   | 6.41334    | -0.0159097    | 0.932292  | 0.979467  |
| Plekha5_j10      | 1.84493   | 1.81486    | -0.0237051    | 0.93061   | 0.978777  |
| Aebp2_j1         | 0.788297  | 0.819973   | 0.0568379     | 0.825167  | 0.943665  |
| Aebp2            | 3.30461   | 3.9387     | 0.25324       | 0.0466989 | 0.247805  |
| Slco1c1_j1       | 0.0557415 | 0          | -1.79769e+308 | 0.0235414 | 1         |
| Slco1c1          | 0.245827  | 0.112946   | -1.12201      | 0.126794  | 0.443479  |
| Pyroxd1          | 1.87941   | 1.89299    | 0.0103851     | 0.938092  | 0.981034  |
| Golt1b           | 17.5037   | 16.3765    | -0.0960304    | 0.343784  | 0.683765  |
| Cmas             | 59.3058   | 58.3743    | -0.0228393    | 0.798854  | 0.933125  |
| Etnk1            | 32.0744   | 26.4523    | 0             | 1         | 1         |
| Etnk1_j1         | 53.5358   | 52.193     | 0             | 1         | 1         |
| AK016914         | 0.0973836 | 0.261105   | 1.42288       | 0.0076803 | 0.0706004 |
| Lrmp_j2          | 0.0484925 | 0.0383149  | -0.339856     | 0.775319  | 1         |
| Lrmp_j10         | 0.0592522 | 0.00508828 | -3.54162      | 0.295759  | 1         |
| Lyrn5            | 1.78075   | 1.42451    | -0.32202      | 0.0362214 | 0.210173  |
| Gm15706          | 0.60651   | 0.665821   | 0.134601      | 0.779883  | 0.925704  |
| Rps25-ps1        | 70.2571   | 86.9596    | 0.307702      | 0.0029929 | 0.034373  |
| Rassf8_j1        | 1.65755   | 1.04137    | 0             | 1         | 1         |
| Sspn             | 1.15954   | 1.36418    | 0             | 1         | 1         |
| Sspn_j2          | 0.864574  | 0          | 0             | 1         | 1         |
| Fgfr1op2         | 9.21415   | 9.18374    | 0             | 1         | 1         |
| Fgfr1op2         | 4.54305   | 4.77891    | 0             | 1         | 1         |
| Med21            | 46.6399   | 50.8892    | 0.125796      | 0.240335  | 0.587681  |
| Stk38l_j1        | 0.542685  | 0.291483   | -0.896702     | 0.369186  | 0.702462  |
| Stk38l_j3        | 0.0655873 | 0.0631866  | -0.053797     | 0.950248  | 1         |
| Stk38l_j4        | 0.182727  | 0.127604   | -0.518017     | 0.543137  | 0.810722  |
| Arntl2_j2        | 0.275558  | 0.184346   | -0.579943     | 0.314744  | 0.658926  |
| Arntl2_j1        | 0.195764  | 0.192941   | -0.0209582    | 0.971404  | 0.991962  |
| Arntl2_j5        | 0.256724  | 0.172083   | -0.577114     | 0.307006  | 0.652122  |
| Arntl2_j8        | 0.326324  | 0.213132   | -0.614562     | 0.436808  | 0.747343  |
| Ppfibp1_j1       | 1.28443   | 1.14819    | 0             | 1         | 1         |
| Ppfibp1          | 1.34368   | 0.979673   | 0             | 1         | 1         |
| Ppfibp1_j5       | 3.5826    | 3.15066    | 0             | 1         | 1         |
| Mrps35           | 9.06101   | 10.9648    | 0.27513       | 0.0767884 | 0.335018  |
| Klhdc5           | 1.4688    | 1.44775    | 0             | 1         | 1         |
| Ccdc91           | 8.59273   | 8.23835    | 0             | 1         | 1         |
| AK087382         | 0.119237  | 0.421522   | 1.82178       | 0.0004001 | 0.0067722 |
| 4833442J19Rik_j1 | 0.379586  | 0.268798   | -0.497904     | 0.0982419 | 0.38741   |
| 2810474O19Rik    | 0.235809  | 0.261313   | 0.148157      | 0.70783   | 0.893525  |
| Bicd1            | 4.66595   | 3.60898    | 0             | 1         | 1         |
| XLOC_028026      | 494.781   | 609.361    | 0             | 1         | 1         |
| XLOC_028026      | 485.285   | 593.108    | 0             | 1         | 1         |
| AK035387_j4      | 0.242528  | 0.140648   | -0.786066     | 0.614555  | 0.847747  |
| Samd9l           | 2.08139   | 1.94522    | -0.0976092    | 0.518655  | 0.796493  |
| Hepacam2_j3      | 0.0791478 | 0.116535   | 0.558142      | 0.553583  | 1         |

|               |           |             |               |           |           |
|---------------|-----------|-------------|---------------|-----------|-----------|
| Bet1          | 14.5619   | 13.7529     | -0.0824614    | 0.505862  | 0.788537  |
| Sgce_j4       | 1.98189   | 2.35327     | 0             | 1         | 1         |
| Sgce          | 2.11779   | 1.71319     | 0             | 1         | 1         |
| Sgce          | 0.528448  | 0.516427    | 0             | 1         | 1         |
| Pon3          | 0.439077  | 0.311109    | -0.497053     | 0.296458  | 0.643089  |
| Pon3_j3       | 0.396042  | 0.230341    | -0.781881     | 0.290668  | 0.638074  |
| Pon2          | 11.2537   | 10.8955     | -0.04668      | 0.71546   | 0.897199  |
| Pdk4          | 1.09594   | 0.952186    | -0.202859     | 0.370479  | 0.703609  |
| Slc25a13_j3   | 0.578553  | 0.24582     | -1.23485      | 0.0758726 | 0.332811  |
| Slc25a13      | 0.448907  | 0.460214    | 0.035887      | 0.914111  | 0.973065  |
| Shfm1         | 40.9075   | 44.0129     | 0.105559      | 0.332341  | 0.67369   |
| Asns          | 34.4157   | 33.4138     | 0             | 1         | 1         |
| Col28a1_j2    | 6.52511   | 7.25007     | 0             | 1         | 1         |
| Col28a1_j3    | 4.84069   | 3.23065     | 0             | 1         | 1         |
| Rpa3          | 0.406803  | 0.464241    | 0.190545      | 0.773031  | 0.923012  |
| AK037260      | 0.106676  | 0.093058    | -0.197036     | 0.824422  | 1         |
| BC062820_j1   | 0.0736213 | 0.017332    | -2.08669      | 0.244625  | 1         |
| Ica1          | 9.85871   | 6.7848      | 0             | 1         | 1         |
| Ica1_j2       | 2.46603   | 1.93908     | 0             | 1         | 1         |
| Ndufa4        | 193.32    | 188.527     | -0.036215     | 0.682093  | 0.880656  |
| Thsd7a_j1     | 5.43954   | 6.5646      | 0.271221      | 0.0052925 | 0.0528825 |
| Thsd7a        | 1.4653    | 1.61035     | 0.136176      | 0.361087  | 0.695733  |
| Tmem168_j3    | 0.204429  | 0           | 0             | 1         | 1         |
| Tmem168       | 3.33291   | 3.25861     | 0             | 1         | 1         |
| B630005N14Rik | 1.98193   | 2.11221     | 0.0918483     | 0.601747  | 0.842408  |
| Gpr85_j4      | 0.373452  | 0.195591    | 0             | 1         | 1         |
| 2610001J05Rik | 16.6902   | 22.5383     | 0.433379      | 0.0270548 | 0.17365   |
| Cttnbp2       | 1.30726   | 1.91469     | 0             | 1         | 1         |
| Tspan12_j1    | 3.29796   | 1.58548     | -1.05666      | 7.46E-05  | 0.0016733 |
| Tspan12       | 6.51944   | 9.11114     | 0.482885      | 0.0005079 | 0.008245  |
| Fam3c_j3      | 2.20584   | 2.21288     | 0             | 1         | 1         |
| Fam3c_j4      | 1.07386   | 0.134372    | 0             | 1         | 1         |
| Fam3c         | 8.63877   | 7.72416     | 0             | 1         | 1         |
| Cadps2_j4     | 1.86813   | 1.64881     | 0             | 1         | 1         |
| Ndufa5_j3     | 55.7919   | 60.329      | 0             | 1         | 1         |
| Ndufa5        | 19.7137   | 16.9728     | 0             | 1         | 1         |
| Wasl          | 22.7736   | 18.0937     | 0             | 1         | 1         |
| Tmem229a      | 13.7925   | 11.1231     | -0.31032      | 0.001029  | 0.0146223 |
| Gpr37         | 4.46817   | 4.38584     | -0.0268301    | 0.835536  | 0.947099  |
| Pot1a         | 3.05535   | 2.62748     | 0             | 1         | 1         |
| Grm8_j7       | 0.298934  | 0.0611979   | -2.28827      | 0.006788  | 0.0642713 |
| Zfp800_j3     | 0.53856   | 0.27556     | -0.966739     | 0.0650429 | 0.303642  |
| Zfp800        | 0.514124  | 0.000278377 | -10.8509      | 0.738946  | 0.908316  |
| Zfp800_j7     | 0.0936129 | 0           | -1.79769e+308 | 0.0045748 | 1         |
| Rbm28         | 6.32138   | 6.12802     | -0.0448182    | 0.695036  | 0.887491  |
| Prmt4_j2      | 0.279812  | 0.136096    | -1.03983      | 0.0566261 | 0.278383  |
| Impdh1_j4     | 1.82167   | 0.0112232   | 0             | 1         | 1         |

|                  |           |                 |            |           |          |
|------------------|-----------|-----------------|------------|-----------|----------|
| Kcp_j3           | 0.169123  | 0.0175787       | -3.26618   | 0.264493  | 0.613354 |
| Kcp_j6           | 0.206174  | 0.049199        | -2.06716   | 0.20305   | 0.546925 |
| Tnpo3_j4         | 5.65229   | 7.7375          | 0          | 1         | 1        |
| Tnpo3            | 0.355845  | 0.421136        | 0          | 1         | 1        |
| Gm2058_j2        | 25.4953   | 24.9843         | -0.0292083 | 0.748637  | 0.912535 |
| Zc3hc1_j2        | 9.5711    | 10.0593         | 0.0717694  | 0.5677    | 0.824883 |
| Tmem209          | 1.81085   | 1.34877         | 0          | 1         | 1        |
| Tmem209_j1       | 0.533112  | 0.758961        | 0          | 1         | 1        |
| Tsga14           | 0.765844  | 0.645421        | 0          | 1         | 1        |
| Copg2_j3         | 0.173749  | 0               | 0          | 1         | 1        |
| Copg2            | 25.9812   | 21.0293         | 0          | 1         | 1        |
| BC145649_j3      | 0.186389  | 0.0380038       | -2.2941    | 0.193206  | 0.535528 |
| Gm13835          | 76.974    | 66.1889         | -0.217783  | 0.0194015 | 0.138037 |
| Podxl_j1         | 0.875282  | 1.27974         | 0          | 1         | 1        |
| Podxl            | 1.90619   | 3.47595         | 0          | 1         | 1        |
| AK085570         | 1.04644   | 0.770506        | -0.441612  | 0.082093  | 0.349173 |
| Plxna4           | 4.22044   | 4.97509         | 0          | 1         | 1        |
| Chchd3_j2        | 8.10276   | 0 -1.79769e+308 |            | 2.17E-43  | 7.54E-41 |
| Chchd3           | 29.0833   | 29.6985         | 0.0302032  | 0.767193  | 0.920598 |
| Slc35b4_j3       | 2.76295   | 2.24738         | 0          | 1         | 1        |
| Slc35b4_j1       | 2.60772   | 2.28633         | 0          | 1         | 1        |
| Slc35b4          | 7.93406   | 6.55792         | 0          | 1         | 1        |
| 2010107G12Rik_j1 | 0.0692704 | 0 -1.79769e+308 |            | 0.0143412 | 1        |
| Cnot4            | 4.46945   | 4.44213         | 0          | 1         | 1        |
| Cnot4            | 1.29296   | 0.966954        | 0          | 1         | 1        |
| Slc13a4          | 0.410034  | 0.377958        | -0.11752   | 0.732109  | 0.905282 |
| Fam180a          | 0.180503  | 0.210639        | 0.222748   | 0.719077  | 0.898959 |
| Mtpn             | 33.3268   | 36.6667         | 0          | 1         | 1        |
| Ptn_j3           | 0.677551  | 1.6909          | 0          | 1         | 1        |
| Ptn              | 43.1917   | 39.207          | 0          | 1         | 1        |
| Dgki_j4          | 0.274022  | 0.167051        | -0.714004  | 0.040074  | 0.224068 |
| Dgki_j2          | 0.0563517 | 0 -1.79769e+308 |            | 4.31E-06  | 1        |
| Creb3l2_j1       | 0.314343  | 0.0628712       | 0          | 1         | 1        |
| Creb3l2          | 2.29331   | 2.00803         | 0          | 1         | 1        |
| Atp6v0a4_j1      | 0.128819  | 0.0608515       | -1.08198   | 0.431508  | 1        |
| Zc3hav1l         | 0.533471  | 0.476542        | -0.162805  | 0.387742  | 0.715426 |
| Zc3hav1_j3       | 2.25754   | 2.51724         | 0          | 1         | 1        |
| Zc3hav1_j5       | 0.433353  | 0.445045        | 0          | 1         | 1        |
| Zc3hav1_j9       | 1.04625   | 1.5298          | 0          | 1         | 1        |
| Hipk2_j1         | 0.328126  | 0.117374        | 0          | 1         | 1        |
| Hipk2            | 0.192941  | 0.05501         | 0          | 1         | 1        |
| Parp12           | 0.342297  | 0.422157        | 0.302531   | 0.398137  | 0.722336 |
| Jhdm1d           | 1.16692   | 0.727342        | 0          | 1         | 1        |
| Slc37a3          | 4.05039   | 2.84092         | 0          | 1         | 1        |
| Mkrrn1_j2        | 12.7443   | 10.0967         | 0          | 1         | 1        |
| Mkrrn1           | 6.5133    | 5.40279         | 0          | 1         | 1        |
| Dennd2a_j5       | 0.740293  | 0.757286        | 0          | 1         | 1        |

|                  |           |                 |            |           |           |
|------------------|-----------|-----------------|------------|-----------|-----------|
| Dennd2a_j4       | 1.51112   | 2.27494         | 0          | 1         | 1         |
| Dennd2a          | 2.33045   | 2.80184         | 0          | 1         | 1         |
| E330009J07Rik    | 1.58744   | 1.14915         | 0          | 1         | 1         |
| Fam131b_j1       | 0.240477  | 0.270125        | 0.167728   | 0.666831  | 0.873918  |
| Fam131b          | 1.64903   | 1.47429         | -0.1616    | 0.338438  | 0.678756  |
| Fam115c          | 0.849426  | 0.705023        | -0.268818  | 0.249518  | 0.596954  |
| Fam115a_j4       | 0.302169  | 4.29012         | 0          | 1         | 1         |
| Fam115a          | 17.0145   | 9.15197         | 0          | 1         | 1         |
| Tpk1             | 2.55292   | 2.28265         | -0.161435  | 0.430049  | 0.743005  |
| Tpk1_j5          | 0.452515  | 0.0483292       | -3.227     | 0.0122165 | 0.0994986 |
| Ezh2_j3          | 0.332358  | 0.317094        | -0.0678297 | 0.897725  | 0.967451  |
| Ezh2_j4          | 0.223681  | 0.0276241       | -3.01744   | 0.0237452 | 0.158504  |
| Pdia4            | 14.4321   | 13.9245         | -0.0516514 | 0.638188  | 0.859943  |
| Zfp786           | 0.297469  | 0.189648        | -0.649417  | 0.158057  | 0.492267  |
| Zfp777           | 2.09798   | 0.937144        | 0          | 1         | 1         |
| Zfp746           | 1.81098   | 1.32516         | 0          | 1         | 1         |
| Zfp746_j4        | 0.713512  | 0.0371184       | 0          | 1         | 1         |
| AK158926_j1      | 0.444477  | 0.361804        | -0.296898  | 0.16206   | 0.497356  |
| Zfp467_j1        | 0.0804839 | 0.0433423       | -0.892922  | 0.503293  | 1         |
| Zfp467           | 0.112402  | 0.0637101       | -0.819079  | 0.353787  | 1         |
| Rarres2_j1       | 1.28111   | 0.000233564     | 0          | 1         | 1         |
| Rarres2          | 1.74972   | 3.04973         | 0          | 1         | 1         |
| Gimap6           | 3.85086   | 3.63774         | -0.0821354 | 0.627265  | 0.854539  |
| Gimap3_j3        | 0.20208   | 0 -1.79769e+308 |            | 0.0129341 | 0.103684  |
| Tmem176b_j1      | 16.5112   | 15.5919         | 0          | 1         | 1         |
| Tmem176b         | 17.6837   | 18.0437         | 0          | 1         | 1         |
| Tra2a_j6         | 4.04143   | 2.95069         | 0          | 1         | 1         |
| Tra2a_j8         | 3.33484   | 3.60224         | 0          | 1         | 1         |
| Tra2a_j7         | 3.97263   | 3.62282         | 0          | 1         | 1         |
| Tra2a            | 13.5013   | 15.8033         | 0          | 1         | 1         |
| Dfna5_j1         | 2.08303   | 1.76038         | -0.242797  | 0.398059  | 0.722279  |
| Dfna5            | 2.33364   | 2.2448          | -0.0559969 | 0.761692  | 0.917978  |
| Osbpl3_j1        | 7.78919   | 2.25703         | 0          | 1         | 1         |
| XLOC_028161      | 0.212493  | 0.0350405       | -2.60032   | 0.120491  | 0.432356  |
| 4921507P07Rik_j1 | 0.17104   | 0.0501376       | -1.77037   | 0.154492  | 0.487674  |
| Hnrnpa2b1        | 0.107451  | 0.224168        | 1.06091    | 0.0864826 | 0.359451  |
| Skap2            | 8.21786   | 9.471           | 0.204754   | 0.0605168 | 0.290048  |
| Hoxa3            | 0.0833832 | 0.0330465       | 0          | 1         | 1         |
| Hoxa5_j3         | 0.576546  | 0.573176        | 0          | 1         | 1         |
| Hoxa5_j2         | 0.681819  | 0.452793        | 0          | 1         | 1         |
| Hoxa7_j6         | 3.45302   | 3.48192         | 0          | 1         | 1         |
| Hoxa7_j5         | 7.04802   | 6.73037         | 0          | 1         | 1         |
| Hoxa9            | 3.39408   | 3.4882          | 0          | 1         | 1         |
| Hoxa9_j7         | 6.53438   | 6.75377         | 0          | 1         | 1         |
| Hoxa10           | 5.75135   | 5.81451         | 0          | 1         | 1         |
| Hoxa11           | 0.0936387 | 0.0987947       | 0.0773287  | 0.906109  | 1         |
| Hibadh_j3        | 2.22644   | 0 -1.79769e+308 |            | 4.37E-15  | 8.70E-13  |

|            |           |                 |            |           |           |
|------------|-----------|-----------------|------------|-----------|-----------|
| Hibadh     | 28.7615   | 24.4137         | -0.236448  | 0.0219612 | 0.150344  |
| Jazf1      | 0.40867   | 0.387876        | 0          | 1         | 1         |
| Scrn1_j1   | 1.20101   | 0.607893        | 0          | 1         | 1         |
| Fkbp14     | 3.83117   | 3.54605         | -0.111574  | 0.482571  | 0.775744  |
| Nod1_j3    | 0.745996  | 0.8491          | 0.186767   | 0.673498  | 0.876948  |
| Nod1_j4    | 0.499459  | 0 -1.79769e+308 |            | 1.61E-06  | 6.25E-05  |
| Nod1       | 2.58709   | 2.17844         | -0.248038  | 0.107606  | 0.407772  |
| Ggct_j1    | 1.8679    | 1.83073         | -0.0289993 | 0.942803  | 0.98265   |
| Ggct       | 8.15757   | 8.26643         | 0.0191239  | 0.915871  | 0.973762  |
| Crhr2_j2   | 0.175214  | 0.231314        | 0.400735   | 0.520663  | 0.797932  |
| Crhr2      | 0.418998  | 0.433745        | 0.0499022  | 0.899523  | 0.967912  |
| Inmt       | 0.522112  | 0.473068        | -0.142312  | 0.728918  | 0.903872  |
| Pde1c_j1   | 2.01222   | 2.56756         | 0          | 1         | 1         |
| Pde1c_j3   | 2.23847   | 4.17449         | 0          | 1         | 1         |
| Pde1c_j5   | 0.257104  | 0               | 0          | 1         | 1         |
| Kbtbd2_j3  | 0.206043  | 0               | 0          | 1         | 1         |
| Nt5c3_j2   | 0.289969  | 0.103727        | 0          | 1         | 1         |
| Nt5c3_j3   | 0.947993  | 0.781518        | 0          | 1         | 1         |
| Nt5c3      | 1.70126   | 1.27478         | 0          | 1         | 1         |
| Ppm1k      | 1.14741   | 0.528504        | -1.11839   | 1.46E-05  | 0.0004294 |
| Pigy       | 3.93724   | 4.04781         | 0.0399591  | 0.738392  | 0.908099  |
| Vopp1_j2   | 2.55984   | 0               | 0          | 1         | 1         |
| Vopp1      | 9.94278   | 8.38161         | 0          | 1         | 1         |
| Nap1I5     | 112.011   | 87.2886         | 0          | 1         | 1         |
| Fam13a     | 4.73472   | 2.75614         | -0.780631  | 9.14E-10  | 7.68E-08  |
| Gprin3     | 0.317834  | 0.246181        | -0.368553  | 0.131514  | 0.451411  |
| Snca       | 5.21418   | 6.85411         | 0.39453    | 0.0287717 | 0.180579  |
| Snca       | 3.02592   | 2.33188         | -0.375879  | 0.198225  | 0.54132   |
| AK158619   | 0.472776  | 0.234895        | -1.00914   | 0.0198967 | 0.14031   |
| Gadd45a_j3 | 0.521596  | 1.69125         | 1.69709    | 0.0068796 | 0.0649553 |
| Gadd45a    | 11.8686   | 33.2085         | 1.4844     | 0         | 0         |
| Rpia_j1    | 1.43958   | 0.989296        | -0.541178  | 0.129639  | 0.448536  |
| Rpia       | 3.22472   | 3.35796         | 0.0584092  | 0.765153  | 0.919657  |
| Thnsl2_j2  | 1.46292   | 1.41258         | -0.0505239 | 0.876197  | 0.960645  |
| Thnsl2     | 3.9632    | 3.80154         | -0.0600825 | 0.737728  | 0.907555  |
| Smyd1      | 0.146084  | 0.251379        | 0.783067   | 0.129818  | 0.448824  |
| Rmnd5a_j3  | 0.0987634 | 0.0839948       | 0          | 1         | 1         |
| Rmnd5a     | 9.73743   | 8.65698         | 0          | 1         | 1         |
| Mrpl35     | 3.73426   | 3.89045         | 0          | 1         | 1         |
| Ptcd3_j5   | 6.81138   | 7.31404         | 0          | 1         | 1         |
| Ptcd3      | 9.24962   | 8.04616         | 0          | 1         | 1         |
| Ptcd3_j2   | 3.03087   | 2.6266          | 0          | 1         | 1         |
| Atoh8      | 0.29405   | 0.21662         | -0.440898  | 0.34153   | 0.681458  |
| Usp39_j2   | 1.09459   | 1.31779         | 0.267731   | 0.402939  | 0.726049  |
| Usp39      | 10.0195   | 9.56021         | -0.0676989 | 0.582973  | 0.832997  |
| Rnf181     | 23.5832   | 25.0368         | 0          | 1         | 1         |
| Rnf181_j4  | 4.18325   | 4.96705         | 0          | 1         | 1         |

|             |           |                 |            |           |           |
|-------------|-----------|-----------------|------------|-----------|-----------|
| Vamp5       | 0.603826  | 0.733787        | 0.281228   | 0.280526  | 0.629156  |
| Vamp8_j1    | 4.42814   | 4.7923          | 0.114018   | 0.682424  | 0.880827  |
| Vamp8_j2    | 5.56271   | 6.20012         | 0.156507   | 0.456674  | 0.760049  |
| Mat2a_j4    | 30.4245   | 31.6925         | 0.0589093  | 0.53685   | 0.80709   |
| Sh2d6_j4    | 0.243137  | 0.156955        | -0.631425  | 0.472444  | 0.769519  |
| Elmod3      | 0.822331  | 1.09259         | 0.409958   | 0.199419  | 0.542361  |
| Elmod3      | 1.39381   | 1.44055         | 0.0475915  | 0.859363  | 0.955525  |
| Tgoln2      | 49.4375   | 47.3947         | -0.0608798 | 0.478028  | 0.77269   |
| Kcmf1       | 11.3134   | 9.56185         | 0          | 1         | 1         |
| Tmsb10      | 9.80361   | 12.3792         | 0.336528   | 0.073487  | 0.326669  |
| Dnahc6_j3   | 0.0883783 | 0.026067        | -1.76147   | 0.21698   | 1         |
| Dnahc6_j4   | 0.109655  | 1.71E-05        | -12.6469   | 0.977209  | 1         |
| Dnahc6_j6   | 0.0908182 | 0.0181016       | -2.32687   | 0.068426  | 1         |
| Dnahc6_j10  | 0.0539612 | 0.0522268       | -0.0471324 | 0.961991  | 1         |
| XLOC_028220 | 0.144139  | 0.0279883       | -2.36456   | 0.0545647 | 0.272455  |
| Ctnna2_j13  | 1.09319   | 1.37131         | 0          | 1         | 1         |
| Mrpl19      | 2.45376   | 2.5313          | 0.0448819  | 0.713582  | 0.896209  |
| Pole4       | 6.85949   | 7.17236         | 0          | 1         | 1         |
| Hk2         | 0.126032  | 0.175999        | 0.481773   | 0.328544  | 0.671065  |
| Sema4f_j1   | 2.65614   | 0.781612        | 0          | 1         | 1         |
| Sema4f      | 1.74583   | 3.50287         | 0          | 1         | 1         |
| Dok1_j3     | 0.0953015 | 0 -1.79769e+308 |            | 0.0327319 | 1         |
| Dok1_j4     | 0.460408  | 0.0662738       | -2.7964    | 0.0137032 | 0.10789   |
| Dok1        | 2.31625   | 2.94663         | 0.34727    | 0.0838981 | 0.35329   |
| Htra2       | 5.2518    | 5.30982         | 0.0158516  | 0.891908  | 0.965687  |
| Tlx2_j2     | 13.457    | 12.2811         | -0.131913  | 0.289836  | 0.637165  |
| Tlx2        | 2.58189   | 2.87107         | 0.153163   | 0.171744  | 0.508904  |
| Wbp1_j8     | 7.41529   | 7.0406          | 0          | 1         | 1         |
| Wbp1_j5     | 1.79698   | 1.53935         | 0          | 1         | 1         |
| Wbp1_j2     | 0.307474  | 0.0452683       | 0          | 1         | 1         |
| Mthfd2      | 10.6808   | 12.9772         | 0          | 1         | 1         |
| Tet3        | 1.53426   | 1.84944         | 0          | 1         | 1         |
| Dguok       | 11.4949   | 13.4004         | 0.221277   | 0.110979  | 0.41459   |
| Stambp      | 7.52302   | 6.60008         | 0          | 1         | 1         |
| Cd207_j1    | 0.167552  | 0.676497        | 2.01347    | 0.0015649 | 0.0204437 |
| Tex261      | 10.2374   | 9.53246         | 0          | 1         | 1         |
| Paip2b_j1   | 2.24156   | 2.76001         | 0.300174   | 0.150603  | 0.481165  |
| Paip2b      | 30.235    | 27.9058         | -0.115655  | 0.204142  | 0.548341  |
| Cyp26b1     | 0.349973  | 0.149684        | -1.22533   | 0.0079379 | 0.0721656 |
| Exoc6b_j5   | 0.0485187 | 0.0191569       | 0          | 1         | 1         |
| Exoc6b      | 4.47605   | 4.45058         | 0          | 1         | 1         |
| Spr         | 17.7693   | 17.9511         | 0.0146912  | 0.894408  | 0.966589  |
| Sfxn5_j4    | 0.145567  | 0               | 0          | 1         | 1         |
| Sfxn5       | 1.05151   | 0.953879        | 0          | 1         | 1         |
| Rab11fip5   | 18.5213   | 21.7989         | 0          | 1         | 1         |
| Fbxo41      | 0.240383  | 0.302103        | 0          | 1         | 1         |
| Dusp11_j4   | 0.528999  | 0.185317        | 0          | 1         | 1         |

|             |          |          |            |           |           |
|-------------|----------|----------|------------|-----------|-----------|
| Dusp11_j3   | 0.388036 | 0.497247 | 0          | 1         | 1         |
| Dusp11_j6   | 2.23315  | 2.33388  | 0          | 1         | 1         |
| Dusp11      | 1.96992  | 2.18669  | 0          | 1         | 1         |
| Pcyox1_j3   | 5.58349  | 5.50607  | -0.0201451 | 0.892831  | 0.96613   |
| Pcyox1      | 33.2342  | 29.3022  | -0.181655  | 0.0464989 | 0.247326  |
| AK009724    | 0.553318 | 0.203308 | -1.44444   | 0.0450737 | 0.242776  |
| AK009724_j1 | 0.371154 | 0.277304 | -0.420548  | 0.52238   | 0.798868  |
| Mxd1        | 0.399153 | 0.345506 | 0          | 1         | 1         |
| Snrnp27     | 21.3025  | 23.681   | 0          | 1         | 1         |
| Gmcl1       | 7.74981  | 7.62912  | 0          | 1         | 1         |
| Anxa4       | 3.19986  | 3.59347  | 0          | 1         | 1         |
| Antxr1_j2   | 2.68774  | 3.22392  | 0          | 1         | 1         |
| Antxr1_j3   | 0.513033 | 0.345746 | 0          | 1         | 1         |
| Antxr1      | 2.2055   | 1.77801  | 0          | 1         | 1         |
| Arhgap25_j1 | 2.26247  | 1.78961  | -0.338252  | 0.120682  | 0.43269   |
| Arhgap25_j4 | 0.149094 | 0.230992 | 0.63162    | 0.346607  | 0.685483  |
| Prokr1_j2   | 0.358825 | 8.85E-05 | 0          | 1         | 1         |
| Prokr1      | 4.60595  | 1.99526  | 0          | 1         | 1         |
| Ap1f_j1     | 0.162104 | 0.631684 | 1.96228    | 2.83E-05  | 0.0007357 |
| Ap1f_j3     | 1.40854  | 1.17695  | -0.259149  | 0.280885  | 0.629386  |
| Rab43       | 0.841679 | 1.17461  | 0          | 1         | 1         |
| Isy1_j1     | 3.01979  | 1.8322   | 0          | 1         | 1         |
| Isy1        | 2.65773  | 2.299    | 0          | 1         | 1         |
| Cnbp        | 38.4562  | 45.5913  | 0          | 1         | 1         |
| Cnbp        | 43.4813  | 53.4259  | 0          | 1         | 1         |
| Rab7        | 26.3421  | 26.9981  | 0          | 1         | 1         |
| Rab7_j5     | 39.9019  | 42.489   | 0          | 1         | 1         |
| Eefsec      | 4.31476  | 4.0633   | -0.0866291 | 0.540091  | 0.808742  |
| Sec61a1_j1  | 33.8588  | 36.578   | 0          | 1         | 1         |
| Sec61a1     | 3.68471  | 4.12227  | 0          | 1         | 1         |
| Kbtbd12     | 0.322377 | 0.177642 | -0.859777  | 0.0354457 | 0.207411  |
| Abtb1_j6    | 2.2155   | 2.29617  | 0          | 1         | 1         |
| Abtb1       | 8.65025  | 7.1712   | 0          | 1         | 1         |
| Abtb1_j2    | 0.624656 | 0.63068  | 0          | 1         | 1         |
| Podxl2_j2   | 23.1111  | 24.6893  | 0.0953011  | 0.338002  | 0.678523  |
| Mcm2        | 1.98528  | 1.71041  | -0.214997  | 0.22458   | 0.571673  |
| Plxna1      | 3.7327   | 2.39175  | 0          | 1         | 1         |
| Chchd6      | 4.85996  | 4.44568  | -0.128542  | 0.604368  | 0.843983  |
| Chchd6      | 30.3544  | 32.2372  | 0.0868204  | 0.4256    | 0.740579  |
| lqsec1_j8   | 1.2061   | 0.763659 | 0          | 1         | 1         |
| lqsec1_j2   | 2.61739  | 1.23182  | 0          | 1         | 1         |
| lqsec1      | 0.674363 | 0.341597 | 0          | 1         | 1         |
| Wnt7a       | 1.08101  | 0.423418 | -1.35223   | 0.0001193 | 0.0024906 |
| Chchd4_j2   | 2.15171  | 3.35483  | 0          | 1         | 1         |
| Chchd4      | 3.29125  | 3.26764  | 0          | 1         | 1         |
| Xpc_j1      | 0.564031 | 0.659722 | 0          | 1         | 1         |
| Xpc         | 1.85647  | 1.88495  | 0          | 1         | 1         |

|               |           |           |               |           |           |
|---------------|-----------|-----------|---------------|-----------|-----------|
| Grip2         | 0.401905  | 0.686474  | 0             | 1         | 1         |
| Mrps25        | 9.08605   | 9.03076   | -0.00880473   | 0.924393  | 0.976347  |
| Zfyve20       | 3.85011   | 3.7174    | 0             | 1         | 1         |
| Prickle2      | 0.818285  | 0.829316  | 0             | 1         | 1         |
| Prickle2      | 1.06898   | 0.448129  | 0             | 1         | 1         |
| Prickle2_j3   | 0.0546865 | 0.0564048 | 0             | 1         | 1         |
| Adamts9_j2    | 0.0707416 | 0.284267  | 2.00662       | 9.03E-06  | 0.0002844 |
| Adamts9_j1    | 0.552122  | 0         | -1.79769e+308 | 3.03E-30  | 1.01E-27  |
| Magi1_j2      | 0.248617  | 0         | 0             | 1         | 1         |
| Magi1_j7      | 1.14856   | 0.203849  | 0             | 1         | 1         |
| Lrig1         | 2.47344   | 3.43572   | 0.474094      | 0.000309  | 0.0054727 |
| Fam19a4       | 12.5353   | 9.42386   | 0             | 1         | 1         |
| A130022J15Rik | 2.58106   | 2.55589   | -0.0141348    | 0.923417  | 0.97612   |
| Tmf1          | 1.90079   | 1.40279   | 0             | 1         | 1         |
| Uba3_j3       | 0.814324  | 0.584603  | 0             | 1         | 1         |
| Uba3          | 5.55051   | 4.83472   | 0             | 1         | 1         |
| Uba3_j4       | 2.59744   | 1.50745   | 0             | 1         | 1         |
| Frmd4b_j7     | 2.35274   | 2.97008   | 0.336161      | 0.163815  | 0.499333  |
| Frmd4b_j1     | 1.54516   | 0.537015  | -1.52472      | 1.00E-06  | 4.15E-05  |
| Frmd4b        | 0.830021  | 0.837189  | 0.0124062     | 0.959256  | 0.988355  |
| Gm765_j2      | 16.6005   | 9.14924   | 0             | 1         | 1         |
| Gm765         | 22.2203   | 14.7196   | 0             | 1         | 1         |
| Eif4e3        | 7.60193   | 8.04378   | 0             | 1         | 1         |
| Eif4e3_j2     | 0.202069  | 0.0878353 | 0             | 1         | 1         |
| Gm14456       | 588.376   | 668.9     | 0.185054      | 0.0341755 | 0.202497  |
| Rybp_j2       | 0.211945  | 0.121347  | -0.804556     | 0.400535  | 0.723948  |
| Shq1_j1       | 0.326265  | 0.215269  | -0.599906     | 0.207435  | 0.55194   |
| Shq1          | 0.696693  | 0.865559  | 0.313108      | 0.261494  | 0.610687  |
| Pdzrn3        | 0.925742  | 0.552864  | -0.743685     | 0.0083855 | 0.0751134 |
| Cntn3_j4      | 0.576958  | 0.264418  | -1.12565      | 0.0027042 | 0.0317962 |
| Crbn_j3       | 1.45644   | 1.66952   | 0             | 1         | 1         |
| Crbn_j5       | 0.21901   | 0.149018  | 0             | 1         | 1         |
| XLOC_028313   | 0.0929497 | 0.0195896 | -2.24636      | 0.210377  | 1         |
| Sumf1_j2      | 4.48691   | 4.5768    | 0             | 1         | 1         |
| Sumf1_j3      | 1.57542   | 1.97752   | 0             | 1         | 1         |
| Sumf1         | 10.8083   | 9.96012   | 0             | 1         | 1         |
| Gm4604        | 90.3662   | 109.128   | 0             | 1         | 1         |
| Gm16433       | 6.22225   | 6.31989   | 0.0224624     | 0.865225  | 0.957045  |
| AK039720_j1   | 0.200767  | 0.260568  | 0.376143      | 0.55254   | 0.816593  |
| Oxtr_j1       | 0.262871  | 0.0664888 | -1.98317      | 0.0052598 | 0.0526505 |
| Oxtr          | 0.118511  | 0.113661  | -0.0602783    | 0.917883  | 1         |
| Rad18         | 0.728395  | 0.712687  | -0.031453     | 0.887434  | 0.96438   |
| Rad18_j1      | 0.153396  | 0.425099  | 1.47054       | 6.32E-05  | 0.001456  |
| Srgap3_j3     | 0.977176  | 0.697617  | -0.486183     | 0.0507081 | 0.260788  |
| Srgap3_j6     | 6.49843   | 6.57233   | 0.0163149     | 0.876608  | 0.960779  |
| Lhfp14_j3     | 56.0784   | 41.6177   | 0             | 1         | 1         |
| Lhfp14        | 21.6726   | 13.2274   | 0             | 1         | 1         |



|                  |           |                 |            |           |           |
|------------------|-----------|-----------------|------------|-----------|-----------|
| Camk1            | 5.68274   | 12.9839         | 0          | 1         | 1         |
| Prrt3_j1         | 0.535859  | 0.440692        | -0.282083  | 0.170573  | 0.507473  |
| Tmem111          | 27.3383   | 27.3764         | 0          | 1         | 1         |
| Sec13            | 42.2189   | 44.2498         | 0          | 1         | 1         |
| Atp2b2_j3        | 4.48649   | 3.74286         | 0          | 1         | 1         |
| Atp2b2_j5        | 5.63845   | 2.92335         | 0          | 1         | 1         |
| Vgll4            | 3.10652   | 2.60785         | 0          | 1         | 1         |
| Vgll4_j1         | 4.46013   | 4.454           | 0          | 1         | 1         |
| 1500001M20Rik    | 5.72042   | 6.1217          | 0.0978119  | 0.539438  | 0.808383  |
| 1500001M20Rik_j2 | 1.91718   | 1.29231         | -0.569038  | 0.0258042 | 0.168081  |
| Raf1             | 0.511301  | 0.488368        | 0          | 1         | 1         |
| Tmem40_j2        | 0.567256  | 0 -1.79769e+308 |            | 4.19E-07  | 1.90E-05  |
| Rpl32_j2         | 0.145968  | 0.028938        | -2.33461   | 0.392417  | 0.718659  |
| Rpl32            | 4.62199   | 5.23961         | 0.180946   | 0.477941  | 0.77269   |
| BC060267_j4      | 0.134909  | 0.52561         | 1.96201    | 0.0010978 | 0.0153713 |
| BC060267_j1      | 0.340693  | 0.138363        | -1.30001   | 0.08617   | 0.358672  |
| BC060267         | 0.751141  | 0.362729        | -1.05019   | 0.0077582 | 0.071037  |
| Mbd4_j2          | 0.121736  | 0.0298527       | -2.02783   | 0.129482  | 1         |
| Mbd4_j3          | 0.255485  | 0 -1.79769e+308 |            | 7.80E-08  | 4.34E-06  |
| Mbd4             | 0.476605  | 0.447531        | -0.0908087 | 0.764563  | 0.919275  |
| Plxnd1_j2        | 0.890208  | 1.06892         | 0          | 1         | 1         |
| Plxnd1           | 9.54347   | 7.86331         | 0          | 1         | 1         |
| Tmcc1            | 1.81978   | 1.25409         | 0          | 1         | 1         |
| Tmcc1_j5         | 0.775485  | 0.635595        | 0          | 1         | 1         |
| Tmcc1_j2         | 0.575066  | 0.314191        | 0          | 1         | 1         |
| Tmcc1            | 2.9647    | 2.95941         | 0          | 1         | 1         |
| Tmcc1_j3         | 1.59708   | 1.98324         | 0          | 1         | 1         |
| Zfp422           | 0.173868  | 0.297288        | 0.773866   | 0.262592  | 0.611643  |
| Rassf4           | 4.37107   | 2.16193         | 0          | 1         | 1         |
| Rassf4_j2        | 2.30791   | 1.27048         | 0          | 1         | 1         |
| Tmem72_j4        | 0.214441  | 0.183582        | 0          | 1         | 1         |
| Tmem72           | 3.31078   | 2.20563         | 0          | 1         | 1         |
| Csgalnact2_j3    | 0.555814  | 0.176547        | 0          | 1         | 1         |
| Csgalnact2       | 1.63268   | 1.63609         | 0          | 1         | 1         |
| Ret_j8           | 21.7459   | 17.2685         | 0          | 1         | 1         |
| Bms1_j1          | 0.0674623 | 0.0179863       | 0          | 1         | 1         |
| Bms1             | 2.12715   | 2.06156         | 0          | 1         | 1         |
| Zfp248           | 0.279415  | 0.272076        | 0          | 1         | 1         |
| Zfp9             | 5.76222   | 5.59393         | -0.0427635 | 0.721976  | 0.900833  |
| Ankrd26_j4       | 0.0813995 | 0               | 0          | 1         | 1         |
| Ankrd26_j1       | 0.733303  | 0.51333         | 0          | 1         | 1         |
| Cacna1c          | 1.91415   | 1.72937         | 0          | 1         | 1         |
| Lrtm2            | 0.0939095 | 0.238225        | 1.34298    | 0.0134587 | 0.106582  |
| Adipor2          | 14.9689   | 15.8144         | 0.0792678  | 0.419885  | 0.73648   |
| Adipor2          | 3.19561   | 2.96229         | -0.109377  | 0.530729  | 0.80314   |
| Erc1_j9          | 5.68969   | 6.56437         | 0          | 1         | 1         |
| Erc1_j3          | 1.37819   | 1.07205         | 0          | 1         | 1         |

|             |           |                 |           |           |          |
|-------------|-----------|-----------------|-----------|-----------|----------|
| Erc1_j8     | 1.44915   | 1.58725         | 0         | 1         | 1        |
| Wnk1_j1     | 14.8723   | 9.02235         | 0         | 1         | 1        |
| Wnk1_j2     | 1.20099   | 0.634214        | 0         | 1         | 1        |
| Wnk1_j15    | 9.03804   | 9.64789         | 0         | 1         | 1        |
| B4galnt3_j4 | 0.0725866 | 0 -1.79769e+308 | 0.0258229 |           | 1        |
| Cecr5_j1    | 0.120491  | 0.486837        | 0         | 1         | 1        |
| Cecr5_j3    | 0.949839  | 2.11767         | 0         | 1         | 1        |
| Cecr5       | 2.25747   | 1.88839         | 0         | 1         | 1        |
| Atp6v1e1_j1 | 5.1188    | 5.63002         | 0         | 1         | 1        |
| Atp6v1e1    | 140.335   | 141.383         | 0         | 1         | 1        |
| Bid         | 6.85239   | 5.80927         | 0         | 1         | 1        |
| Mical3_j3   | 0.990488  | 0.871569        | -0.184524 | 0.474654  | 0.770791 |
| Mical3_j4   | 0.248466  | 0.0760821       | -1.70742  | 0.0006365 | 0.009954 |
| Mical3_j6   | 0.804788  | 0.538742        | -0.579013 | 0.0102807 | 0.087292 |
| Iqsec3      | 2.84948   | 3.11297         | 0         | 1         | 1        |
| Phc1_j4     | 0.137571  | 0.126686        | 0         | 1         | 1        |
| Phc1_j3     | 1.19519   | 1.01983         | 0         | 1         | 1        |
| Rimkb_j3    | 0.510148  | 0.623321        | 0.289058  | 0.491518  | 0.780571 |
| Apobec1_j2  | 0.13841   | 0 -1.79769e+308 | 0.0014069 | 0.0187729 |          |
| Apobec1_j3  | 0.130902  | 0.0555644       | -1.23626  | 0.321306  | 1        |
| Slc2a3_j5   | 0.819489  | 2.24116         | 0         | 1         | 1        |
| Slc2a3      | 13.7531   | 13.7257         | 0         | 1         | 1        |
| Slc2a3_j7   | 0.66645   | 0.277657        | 0         | 1         | 1        |
| C3ar1       | 0.442124  | 0.899305        | 1.02436   | 5.59E-07  | 2.49E-05 |
| Pex5        | 4.47949   | 4.92609         | 0         | 1         | 1        |
| Clstn3      | 21.7203   | 22.4615         | 0.0484124 | 0.59816   | 0.840629 |
| C1s_j5      | 0.959479  | 1.29972         | 0.437877  | 0.162235  | 0.497579 |
| C1s_j6      | 0.353605  | 0.450341        | 0.348878  | 0.490317  | 0.779913 |
| Emg1        | 0.451279  | 0.454608        | 0.0106021 | 0.964686  | 0.990042 |
| Ptpn6       | 0.816658  | 1.25305         | 0.617635  | 0.0181497 | 0.131804 |
| Grcc10      | 30.3098   | 31.8486         | 0.071446  | 0.458858  | 0.761335 |
| Eno2_j5     | 1.13149   | 0               | 0         | 1         | 1        |
| Eno2_j6     | 0.345279  | 0.387937        | 0         | 1         | 1        |
| Eno2        | 12.633    | 14.1902         | 0         | 1         | 1        |
| Tpi1_j1     | 111.66    | 133.062         | 0         | 1         | 1        |
| Tpi1        | 9.26575   | 9.84083         | 0         | 1         | 1        |
| Usp5_j1     | 50.3245   | 54.5916         | 0         | 1         | 1        |
| Usp5_j2     | 2.39171   | 1.83826         | 0         | 1         | 1        |
| Usp5        | 18.4662   | 18.9103         | 0         | 1         | 1        |
| Gnb3        | 0.384291  | 0.356093        | -0.109945 | 0.814473  | 0.939456 |
| Gnb3_j2     | 0.0919439 | 0 -1.79769e+308 | 0.0323161 |           | 1        |
| Leprel2_j8  | 0.068588  | 0.015643        | -2.13244  | 0.102581  | 1        |
| Lag3_j6     | 0.109986  | 0 -1.79769e+308 | 0.0364379 |           | 1        |
| Ptms_j7     | 2.32833   | 5.94452         | 0         | 1         | 1        |
| Ptms        | 46.7111   | 46.382          | 0         | 1         | 1        |
| Cops7a_j1   | 28.8811   | 23.7005         | 0         | 1         | 1        |
| Ncapd2_j2   | 0.3664    | 0.223209        | -0.715027 | 0.0220656 | 0.150846 |

|               |           |                 |            |           |           |
|---------------|-----------|-----------------|------------|-----------|-----------|
| Tapbpl_j1     | 2.78394   | 5.06699         | 0.864003   | 1.48E-05  | 0.0004327 |
| Tapbpl        | 5.52654   | 3.75409         | -0.557912  | 1.37E-06  | 5.46E-05  |
| AK085609_j1   | 0.168249  | 0.13749         | -0.291273  | 0.634536  | 0.858242  |
| Ltbr_j1       | 2.88242   | 4.31598         | 0.582408   | 0.0154153 | 0.117261  |
| Ltbr          | 4.56887   | 4.90007         | 0.100963   | 0.491344  | 0.780513  |
| Plekhg6_j2    | 0.105838  | 0.239597        | 1.17875    | 0.0556953 | 0.275839  |
| Cd9           | 121.594   | 128.156         | 0          | 1         | 1         |
| Ntf3          | 0.323824  | 0.156493        | -1.04911   | 0.136629  | 0.459682  |
| Kcna5         | 0.277437  | 0.369579        | 0.413721   | 0.251181  | 0.59905   |
| Kcna1         | 60.1006   | 43.2101         | -0.476011  | 4.47E-08  | 2.67E-06  |
| Kcna6         | 36.3843   | 35.5367         | -0.0340066 | 0.691589  | 0.885756  |
| Ndufa9_j1     | 17.6425   | 19.3986         | 0          | 1         | 1         |
| Dyrk4_j7      | 0.0739898 | 0 -1.79769e+308 | 0.0311497  |           | 1         |
| Dyrk4_j10     | 0.280238  | 0.251159        | -0.158056  | 0.747483  | 0.912113  |
| Rad51ap1      | 0.363133  | 0.417856        | 0.20251    | 0.640705  | 0.861242  |
| Rad51ap1      | 0.19067   | 0.0386098       | -2.30404   | 0.0739382 | 0.327808  |
| 9630033F20Rik | 16.1806   | 15.9643         | -0.019409  | 0.837964  | 0.948329  |
| Ccnd2         | 0.627882  | 0.711578        | 0.180527   | 0.42182   | 0.737912  |
| Prmt8         | 9.05959   | 6.62384         | -0.451778  | 0.0004299 | 0.0071763 |
| XLOC_028421   | 0.070562  | 0.0316584       | 0          | 1         | 1         |
| Tspan9_j1     | 1.24671   | 0.000245225     | -12.3117   | 0.613842  | 0.847685  |
| Tspan9        | 1.77454   | 2.39527         | 0.432738   | 0.0140739 | 0.109887  |
| AK033854_j5   | 1.08177   | 1.11927         | 0          | 1         | 1         |
| AK033854_j6   | 0.626197  | 0.288779        | 0          | 1         | 1         |
| Tead4_j1      | 0.135061  | 0.0162204       | -3.05773   | 0.143135  | 1         |
| Tulp3         | 6.79418   | 7.07835         | 0.0591128  | 0.628756  | 0.855636  |
| 5930416I19Rik | 1.54423   | 2.14232         | 0          | 1         | 1         |
| 5930416I19Rik | 1.95962   | 1.80722         | 0          | 1         | 1         |
| Itfg2         | 1.94423   | 1.85062         | 0          | 1         | 1         |
| Fkbp4         | 30.8187   | 24.1858         | 0          | 1         | 1         |
| BC048546      | 25.8627   | 27.9283         | 0          | 1         | 1         |
| Klrb1b        | 0.0768116 | 0.168987        | 1.13752    | 0.155241  | 0.488418  |
| AK009064      | 0.210875  | 0.248834        | 0.238794   | 0.72083   | 0.900095  |
| AK036632_j2   | 0.459033  | 0.424063        | -0.11432   | 0.885193  | 0.963642  |
| Clec1a        | 0.177724  | 0.160219        | -0.149598  | 0.753783  | 0.915037  |
| Gm5581        | 0.269901  | 0.083569        | -1.69139   | 0.0175007 | 0.128355  |
| Magohb        | 4.27004   | 4.23742         | -0.0110631 | 0.964391  | 0.989999  |
| Csda_j1       | 2.95906   | 4.38533         | 0          | 1         | 1         |
| Csda          | 7.96322   | 11.5193         | 0          | 1         | 1         |
| Csda          | 4.67159   | 5.78607         | 0          | 1         | 1         |
| Lrp6          | 1.1999    | 0.845884        | 0          | 1         | 1         |
| Mansc1        | 1.8669    | 1.59654         | -0.225697  | 0.0930824 | 0.375357  |
| Dusp16        | 1.81809   | 1.56323         | -0.217899  | 0.211089  | 0.555889  |
| Hebp1         | 1.99134   | 2.73999         | 0.460429   | 0.0583509 | 0.283601  |
| Plbd1         | 0.846595  | 1.33842         | 0.660784   | 0.0028487 | 0.0330436 |
| Wbp11         | 14.6666   | 11.0856         | 0          | 1         | 1         |
| Art4_j2       | 0.0518918 | 0 -1.79769e+308 | 0.0370857  |           | 1         |

|                  |           |                 |           |           |           |
|------------------|-----------|-----------------|-----------|-----------|-----------|
| Mgp              | 6.63453   | 11.9778         | 0.852297  | 3.09E-07  | 1.46E-05  |
| Rerg             | 0.593742  | 0.271939        | -1.12655  | 0.0065533 | 0.0625462 |
| Eps8             | 0.865873  | 1.0693          | 0         | 1         | 1         |
| Eps8_j2          | 0.227613  | 3.42E-05        | 0         | 1         | 1         |
| Eps8             | 0.452784  | 0.727285        | 0         | 1         | 1         |
| Slc15a5_j1       | 0.138882  | 0.12266         | -0.179193 | 0.891108  | 0.965576  |
| Slc15a5_j7       | 0.266035  | 0 -1.79769e+308 |           | 9.82E-05  | 0.0021207 |
| Lmo3_j1          | 0.113872  | 0 -1.79769e+308 |           | 0.000381  | 1         |
| Rpl38-ps2        | 228.276   | 272.627         | 0.256149  | 0.007161  | 0.067024  |
| Slco1a4_j3       | 1.45683   | 1.2951          | -0.169769 | 0.462918  | 0.763401  |
| Slco1a4_j10      | 0.465331  | 0.364336        | -0.35299  | 0.514357  | 0.793394  |
| Recql            | 5.61513   | 4.87077         | -0.20517  | 0.115081  | 0.421986  |
| Ldhd             | 30.5377   | 21.5476         | 0         | 1         | 1         |
| Kcnj8_j2         | 0.119887  | 0 -1.79769e+308 |           | 0.0051774 | 1         |
| Kcnj8_j3         | 0.403642  | 0.440879        | 0.127308  | 0.779234  | 0.925601  |
| Kcnj8            | 0.176368  | 0.260664        | 0.563609  | 0.385646  | 0.714209  |
| Abcc9_j2         | 0.0965938 | 0.106293        | 0.138044  | 0.864133  | 1         |
| St8sia1          | 0.671709  | 0.439252        | 0         | 1         | 1         |
| St8sia1_j4       | 2.79549   | 2.25266         | 0         | 1         | 1         |
| St8sia1_j5       | 3.92701   | 2.63599         | 0         | 1         | 1         |
| St8sia1_j2       | 0.0939695 | 0.0524744       | 0         | 1         | 1         |
| 5730419I09Rik_j4 | 5.94966   | 6.12573         | 0         | 1         | 1         |
| 5730419I09Rik_j7 | 3.96431   | 3.61105         | 0         | 1         | 1         |
| 5730419I09Rik_j5 | 0.0922348 | 0.0227618       | 0         | 1         | 1         |
| XLOC_028478      | 0.206466  | 0.0634416       | -1.7024   | 0.062347  | 0.295582  |
| AK086149         | 0.771678  | 0.880952        | 0.191064  | 0.41392   | 0.732571  |
| Bcat1_j1         | 2.15036   | 2.69339         | 0         | 1         | 1         |
| Bcat1            | 18.2636   | 11.5127         | 0         | 1         | 1         |
| Bcat1_j4         | 2.6873    | 0               | 0         | 1         | 1         |
| Casc1_j2         | 0.0496107 | 0 -1.79769e+308 |           | 0.064872  | 1         |
| Nras_j1          | 1.41622   | 2.20119         | 0.63624   | 0.0008051 | 0.0120371 |
| Kras             | 14.2272   | 12.4288         | -0.19496  | 0.040872  | 0.227098  |
| Bhlhe41          | 0.363001  | 0.422181        | 0.217889  | 0.423971  | 0.739374  |
| XLOC_028490      | 0.278156  | 0.665062        | 1.2576    | 0.107067  | 0.406551  |
| Itpr2_j2         | 0.0969015 | 0.0988912       | 0.0293244 | 0.965751  | 1         |
| Tm7sf3_j3        | 0.128782  | 0.0997786       | 0         | 1         | 1         |
| Tm7sf3           | 9.86134   | 8.71205         | 0         | 1         | 1         |
| Pthlh            | 2.26354   | 2.54651         | 0.16994   | 0.365477  | 0.699338  |
| Ergic2_j1        | 3.67977   | 3.71067         | 0         | 1         | 1         |
| Tmtc1_j1         | 0.363941  | 0.208126        | 0         | 1         | 1         |
| Ipo8             | 4.37308   | 4.07041         | 0         | 1         | 1         |
| Caprin2          | 2.60032   | 2.35714         | 0         | 1         | 1         |
| Caprin2_j8       | 0.704336  | 0.739381        | 0         | 1         | 1         |
| Dennd5b          | 1.004     | 0.600283        | 0         | 1         | 1         |
| Amn1             | 2.39468   | 2.87632         | 0.264396  | 0.290953  | 0.638208  |
| Gm15782          | 5.53782   | 6.6755          | 0.269556  | 0.206832  | 0.551471  |
| XLOC_027557      | 0.0956824 | 0.132785        | 0.472771  | 0.760956  | 1         |

|                  |           |           |              |           |          |
|------------------|-----------|-----------|--------------|-----------|----------|
| Col1a2           | 12.2861   | 13.6572   | 0            | 1         | 1        |
| Col1a2_j3        | 0.0702022 | 0         | 0            | 1         | 1        |
| Neurabin_j6      | 0.0274441 | 0.133738  | 0            | 1         | 1        |
| Neurabin_j7      | 0.0833356 | 0.17757   | 0            | 1         | 1        |
| Dync1i1          | 21.2321   | 18.582    | 0            | 1         | 1        |
| Tac1_j2          | 0.362822  | 0.0724438 | -2.32433     | 0.301245  | 0.647609 |
| Nxph1            | 1.48945   | 1.19553   | -0.317131    | 0.217312  | 0.563505 |
| Phf14_j4         | 2.76194   | 3.50926   | 0.345485     | 0.312404  | 0.65699  |
| Cav1             | 6.15222   | 6.06169   | 0            | 1         | 1        |
| St7              | 0.237881  | 0.12147   | -0.969648    | 0.266287  | 0.615495 |
| St7_j1           | 1.1369    | 1.48862   | 0.388871     | 0.310505  | 0.655231 |
| St7_j2           | 0.556752  | 0.963632  | 0.791448     | 0.0385973 | 0.218826 |
| St7              | 1.42864   | 1.0471    | -0.448246    | 0.13633   | 0.459356 |
| Ing3_j1          | 2.28007   | 2.66605   | 0.225623     | 0.279257  | 0.628017 |
| Wnt16_j2         | 0.0436253 | 0.157633  | 1.85333      | 0.24129   | 0.588445 |
| XLOC_027589      | 0.0963992 | 0.129687  | 0.427942     | 0.638355  | 1        |
| XLOC_027589      | 0.0890059 | 0.122322  | 0.458707     | 0.543287  | 1        |
| Flnc_j3          | 1.20289   | 3.70308   | 1.62222      | 0         | 0        |
| Irf5             | 0.214391  | 0.483549  | 1.17342      | 0.0345755 | 0.204148 |
| Smo_j1           | 1.95703   | 2.25283   | 0.203076     | 0.286266  | 0.63506  |
| Ahcyl2           | 6.81273   | 4.17446   | 0            | 1         | 1        |
| Nrf1             | 2.77282   | 3.15449   | 0.186049     | 0.223633  | 0.570873 |
| Klhdc10_j1       | 0.732853  | 0.988411  | 0            | 1         | 1        |
| Exoc4_j1         | 6.63284   | 6.73534   | 0            | 1         | 1        |
| Exoc4_j5         | 5.90647   | 6.49963   | 0            | 1         | 1        |
| Akr1b8           | 3.3168    | 10.5757   | 1.67289      | 0         | 0        |
| Cald1_j2         | 3.12704   | 3.49686   | 0            | 1         | 1        |
| Agbl3_j2         | 0         | 0.143875  | 1.79769e+308 | 0.0040627 | 1        |
| 1810058I24Rik_j2 | 13.56     | 14.6973   | 0            | 1         | 1        |
| Trim24_j2        | 1.37757   | 1.61072   | 0.22558      | 0.311079  | 0.655898 |
| Ubn2_j3          | 0.125177  | 0.172359  | 0.461444     | 0.744426  | 0.910803 |
| Ubn2_j4          | 0.268357  | 0.121789  | -1.13977     | 0.341547  | 0.681458 |
| Luc7l2_j3        | 0.119972  | 0         | 0            | 1         | 1        |
| Clec2l_j1        | 90.2859   | 46.523    | -0.956556    | 1.11E-15  | 2.45E-13 |
| Tbxas1_j4        | 0.0132956 | 0.202626  | 3.9298       | 0.39203   | 0.718383 |
| Ndufb2           | 1.78715   | 2.00082   | 0            | 1         | 1        |
| Agk_j1           | 0.0996212 | 0.211911  | 1.08894      | 0.347151  | 0.685836 |
| Ephb6_j1         | 0.889999  | 1.39716   | 0.650624     | 0.0232728 | 0.156315 |
| Casp2_j3         | 0.320729  | 0.196363  | 0            | 1         | 1        |
| Zyx_j2           | 18.3588   | 20.3599   | 0            | 1         | 1        |
| Zyx_j8           | 0.155275  | 0.0935738 | 0            | 1         | 1        |
| Arhgef5_j7       | 0.10237   | 0.179549  | 0.81059      | 0.437954  | 0.747865 |
| Cul1             | 2.81609   | 2.66798   | -0.0779433   | 0.613913  | 0.847685 |
| XLOC_027664      | 0.69164   | 0.846254  | 0.29107      | 0.590231  | 0.836402 |
| Zfp282_j5        | 1.56836   | 2.0968    | 0.418932     | 0.0164575 | 0.12283  |
| Zfp212           | 2.25828   | 2.29219   | 0.0215027    | 0.911881  | 0.972279 |
| mKIAA4190_j4     | 0.162556  | 0.101753  | -0.675863    | 0.376739  | 0.708706 |

|                  |           |                        |            |           |           |
|------------------|-----------|------------------------|------------|-----------|-----------|
| Zfp956           | 0.357215  | 0.368108               | 0.0433362  | 0.923741  | 0.976223  |
| Krba1_j5         | 0.338883  | 0.144214               | -1.23258   | 0.01184   | 0.0972113 |
| Krba1_j4         | 0.694696  | 1.0324                 | 0.571552   | 0.0154606 | 0.117458  |
| Krba1_j7         | 1.82943   | 2.53718                | 0.471834   | 0.0499156 | 0.258155  |
| Sspo_j8          | 0.0612974 | 0 -1.79769e+308        |            | 0.0814294 | 1         |
| Zfp862_j2        | 3.69798   | 4.59516                | 0.31338    | 0.0093803 | 0.081726  |
| Atp6v0e2_j2      | 178.483   | 167.171                | -0.0944648 | 0.271603  | 0.620436  |
| Repin1           | 0         | 0.0676052 1.79769e+308 |            | 0.0304742 | 1         |
| Repin1           | 0.0531528 | 0 -1.79769e+308        |            | 0.0249967 | 1         |
| AI854703         | 0.115972  | 0 -1.79769e+308        |            | 0.0009761 | 1         |
| AI854703_j4      | 0.323491  | 0.149558               | -1.11302   | 0.121226  | 0.43358   |
| AI854703_j7      | 1.44496   | 1.28468                | -0.169618  | 0.575812  | 0.828497  |
| Gimap8_j2        | 0.0523817 | 0.0291475              | -0.845691  | 0.665424  | 1         |
| Gimap4_j1        | 0.628273  | 0.695357               | 0.146362   | 0.79724   | 0.932581  |
| 2410003K15Rik_j4 | 0.354999  | 0.292774               | -0.27803   | 0.69226   | 0.886092  |
| D330028D13Rik    | 0.0249405 | 0.114634               | 2.20047    | 0.151796  | 1         |
| AK043004_j5      | 0.135674  | 0.0740122              | -0.87431   | 0.545602  | 1         |
| Snx10            | 9.84261   | 12.6497                | 0          | 1         | 1         |
| 5730446D14Rik_j3 | 0.0527386 | 0.0320133              | -0.720188  | 0.595148  | 1         |
| Tax1bp1_j1       | 12.1302   | 12.9877                | 0          | 1         | 1         |
| Prr15_j1         | 0.258536  | 0.371457               | 0.522826   | 0.492107  | 0.78083   |
| Gars             | 16.8736   | 20.0053                | 0.245612   | 0.0118164 | 0.0970832 |
| Aqp1_j2          | 44.5898   | 54.7774                | 0          | 1         | 1         |
| Herc6_j2         | 0.0786434 | 0.182496               | 1.21447    | 0.0369706 | 0.212822  |
| Lancl2_j2        | 10.4958   | 9.64599                | 0          | 1         | 1         |
| Abcg2_j1         | 6.04226   | 6.47654                | 0          | 1         | 1         |
| Abcg2_j3         | 2.10686   | 4.27601                | 0          | 1         | 1         |
| Herc3_j1         | 1.33746   | 1.40509                | 0          | 1         | 1         |
| XLOC_027720      | 0.0930668 | 0.0562352              | -0.726795  | 0.689495  | 1         |
| Fam190a_j5       | 0.241552  | 0.390547               | 0.693164   | 0.407365  | 0.727951  |
| A930038C07Rik_j1 | 2.20354   | 1.99093                | -0.146383  | 0.460688  | 0.762129  |
| Prdm5_j10        | 0.0642794 | 0.0561065              | -0.19619   | 0.920845  | 1         |
| Mad2l1_j1        | 0.0986112 | 0 -1.79769e+308        |            | 0.0479446 | 1         |
| Mad2l1_j4        | 0.139948  | 0.000232844            | -9.23131   | 0.922143  | 0.975642  |
| Gng12            | 0.37887   | 0.604075               | 0          | 1         | 1         |
| AK054076_j1      | 0.568118  | 0.595488               | 0.0678813  | 0.87816   | 0.96104   |
| AK054076_j2      | 0.312576  | 0.149955               | -1.05967   | 0.188206  | 0.529448  |
| AK054076_j3      | 0.181367  | 0.0741722              | -1.28996   | 0.211907  | 0.556689  |
| AK054076_j4      | 0.47685   | 0.492873               | 0.0476812  | 0.873826  | 0.959888  |
| abParts_j1       | 0         | 0.244899 1.79769e+308  |            | 0.033378  | 0.19947   |
| abParts_j2       | 0.629909  | 0.571596               | -0.140148  | 0.848638  | 0.952118  |
| Eif2ak3_j1       | 0.393339  | 0.573635               | 0.544359   | 0.233668  | 0.581007  |
| Krcc1_j2         | 7.3442    | 7.45755                | 0.0220959  | 0.886264  | 0.963839  |
| Vps24_j1         | 7.04624   | 9.18348                | 0          | 1         | 1         |
| Reep1_j1         | 8.47143   | 15.6146                | 0          | 1         | 1         |
| Immt_j1          | 0.852352  | 0.739156               | 0          | 1         | 1         |
| Immt_j2          | 1.48385   | 0                      | 0          | 1         | 1         |

|                  |           |           |              |           |          |
|------------------|-----------|-----------|--------------|-----------|----------|
| 0610030E20Rik_j1 | 0         | 0.0473255 | 0            | 1         | 1        |
| Suclg1_j3        | 0.277484  | 0.228523  | -0.280069    | 0.747163  | 0.911904 |
| Lrrtm1           | 0.234269  | 0.228804  | 0            | 1         | 1        |
| Lrrtm1_j4        | 4.48801   | 3.86557   | 0            | 1         | 1        |
| Gm5576           | 8.25007   | 8.50772   | 0.044365     | 0.759242  | 0.917118 |
| Loxl3_j2         | 0.686898  | 1.03238   | 0.587803     | 0.0041849 | 0.044312 |
| Aup1_j2          | 16.0621   | 17.2735   | 0.104902     | 0.418741  | 0.735495 |
| Pcgf1_j2         | 0.0876996 | 2.27679   | 4.69829      | 0         | 0        |
| Ccdc142_j3       | 0.808719  | 0.788507  | -0.0365136   | 0.905515  | 0.969961 |
| Dctn1_j3         | 0.371435  | 0.170341  | 0            | 1         | 1        |
| B230319C09Rik_j2 | 0.194243  | 0.110403  | 0            | 1         | 1        |
| AK137133_j1      | 0.057387  | 0.0203795 | -1.4936      | 0.549502  | 1        |
| Nagk_j1          | 3.40919   | 3.66959   | 0            | 1         | 1        |
| Nagk_j4          | 11.0886   | 16.45     | 0            | 1         | 1        |
| Nagk_j5          | 5.62675   | 5.15146   | 0            | 1         | 1        |
| Zfml_j2          | 2.4742    | 2.45757   | 0            | 1         | 1        |
| Dysf_j5          | 8.39493   | 11.2182   | 0            | 1         | 1        |
| Smyd5            | 16.4606   | 17.6256   | 0.0986565    | 0.330343  | 0.672205 |
| Alms1_j11        | 0.169528  | 0.161019  | -0.0742918   | 0.969701  | 0.99148  |
| Alms1_j2         | 0.562367  | 0.698103  | 0.311927     | 0.478     | 0.77269  |
| Alms1_j4         | 0.116193  | 0.211231  | 0.862303     | 0.407141  | 0.727764 |
| Add2             | 7.39318   | 9.03063   | 0            | 1         | 1        |
| Snrpg_j4         | 2.71143   | 3.58259   | 0.401947     | 0.291925  | 0.638801 |
| Aak1_j1          | 1.80553   | 1.97333   | 0            | 1         | 1        |
| Nfu1_j1          | 0.314502  | 0.0724368 | 0            | 1         | 1        |
| Gfpt1_j1         | 0.0807063 | 0         | 0            | 1         | 1        |
| Copg_j4          | 27.7263   | 38.0269   | 0            | 1         | 1        |
| Copg_j5          | 0.144698  | 0.665636  | 0            | 1         | 1        |
| Gm5577           | 0.559513  | 0.570073  | 0.0269755    | 0.949718  | 0.985412 |
| XLOC_027797      | 0.0467807 | 0.0448756 | -0.0599797   | 0.964373  | 1        |
| Ruvbl1_j4        | 0.27525   | 0.557706  | 1.01876      | 0.186645  | 0.527475 |
| Ruvbl1_j3        | 0.64658   | 0.16605   | -1.96121     | 0.175758  | 0.514267 |
| Tpra1_j3         | 0.856321  | 2.36363   | 0            | 1         | 1        |
| Hdac11_j1        | 5.94135   | 6.94268   | 0.224701     | 0.169016  | 0.505791 |
| Fbln2_j5         | 6.20423   | 3.8065    | 0            | 1         | 1        |
| Arl6ip5_j3       | 0.196892  | 0.0384884 | -2.35491     | 0.240568  | 0.588013 |
| Mitf_j4          | 0.0424721 | 0.0508249 | 0.259018     | 0.86727   | 1        |
| Lrrn1_j2         | 37.3291   | 30.4643   | 0            | 1         | 1        |
| Bhlhe40_j1       | 4.72437   | 3.40703   | 0            | 1         | 1        |
| Brpf1            | 0.101341  | 0.0768167 | -0.399729    | 0.638786  | 1        |
| Arpc4            | 13.4071   | 15.8882   | 0            | 1         | 1        |
| Jagn1_j1         | 1.31439   | 1.53585   | 0            | 1         | 1        |
| Il17rc_j4        | 0.419148  | 0.377064  | -0.152649    | 0.76238   | 0.918113 |
| Il17rc_j6        | 0         | 0.152628  | 1.79769e+308 | 0.0378559 | 1        |
| Creld1_j1        | 48.6053   | 50.0095   | 0.0410885    | 0.670256  | 0.875235 |
| Creld1_j2        | 0.45178   | 0.409466  | -0.141876    | 0.820161  | 0.941808 |
| 6720456B07Rik_j1 | 36.7036   | 37.8441   | 0            | 1         | 1        |

|                  |           |                        |            |           |           |
|------------------|-----------|------------------------|------------|-----------|-----------|
| Syn2             | 29.4924   | 25.9915                | -0.182302  | 0.0566748 | 0.278482  |
| Tsen2_j2         | 1.23437   | 1.01387                | -0.283894  | 0.4516    | 0.756717  |
| Mkrn2            | 0.622479  | 0.667641               | 0          | 1         | 1         |
| Cand2_j1         | 0.0747199 | 0.1178                 | 0.656773   | 0.611383  | 1         |
| Cand2_j2         | 0.147122  | 0.0532632              | -1.4658    | 0.0275445 | 0.175637  |
| mFLJ00025_j1     | 2.6635    | 3.6268                 | 0          | 1         | 1         |
| mFLJ00025_j4     | 6.82748   | 5.8463                 | 0          | 1         | 1         |
| mFLJ00025_j3     | 10.1733   | 11.8407                | 0          | 1         | 1         |
| Rho_j3           | 0.217717  | 0.35601                | 0          | 1         | 1         |
| D6Wsu116e        | 0.538095  | 0.50335                | -0.0962988 | 0.748883  | 0.912691  |
| D6Wsu116e_j4     | 8.28133   | 12.0688                | 0.543343   | 0.0008926 | 0.0130769 |
| March8_j2        | 0.139284  | 0.365794               | 0          | 1         | 1         |
| March8_j3        | 0.056962  | 0.294919               | 0          | 1         | 1         |
| Zfp637_j1        | 0.0621971 | 0.118094               | 0.925019   | 0.318722  | 1         |
| Zfp239_j2        | 0.0522782 | 0.119655               | 1.1946     | 0.220113  | 1         |
| Hnrnpf_j2        | 4.45898   | 4.58252                | 0          | 1         | 1         |
| Rasgef1a_j5      | 0.168115  | 0 -1.79769e+308        | 0.0003279  | 0.0057497 | 0.0057497 |
| Dcp1b_j5         | 1.12039   | 0.748037               | -0.582815  | 0.135113  | 0.457301  |
| Rad52_j9         | 0.149027  | 0 -1.79769e+308        | 0.0056716  | 0.0559341 | 0.0559341 |
| Rad52_j8         | 1.05341   | 1.71217                | 0.700761   | 0.0302383 | 0.186706  |
| Kdm5a_j9         | 0.519708  | 0.56335                | 0          | 1         | 1         |
| Clec4a1_j1       | 0.18462   | 0.356724               | 0.950247   | 0.313313  | 0.657596  |
| Clec4a3_j2       | 0.213854  | 0.360425               | 0.753074   | 0.319728  | 0.663064  |
| C1ra_j2          | 0.269122  | 0.68902                | 1.35628    | 0.0381908 | 0.217229  |
| Lpcat3_j3        | 0.202364  | 0.218601               | 0.111349   | 0.783725  | 0.92714   |
| Phb2             | 0.11229   | 5.51658                | 5.61848    | 0         | 0         |
| Zfp384_j1        | 0.106356  | 0.0390811              | 0          | 1         | 1         |
| Acrbp_j8         | 1.91556   | 1.87332                | -0.0321695 | 0.878036  | 0.960961  |
| Acrbp_j15        | 0         | 0.0558206 1.79769e+308 | 0.0927188  | 1         | 1         |
| Acrbp_j14        | 0.351452  | 0.486942               | 0.47042    | 0.303872  | 0.649532  |
| Lpar5            | 0.0222135 | 0.0553034              | 1.31593    | 0.176573  | 1         |
| Iffo1_j4         | 0.600075  | 0.891273               | 0          | 1         | 1         |
| Iffo1            | 0         | 1.05007                | 0          | 1         | 1         |
| E130112N10Rik_j2 | 0.13546   | 0 -1.79769e+308        | 0.0064077  | 1         | 1         |
| Tnfrsf1a_j3      | 0.267549  | 1.49782                | 2.48498    | 1.20E-05  | 0.0003616 |
| XLOC_027942      | 0.108906  | 0.0974745              | -0.159993  | 0.836774  | 1         |
| XLOC_027948      | 1.92E-05  | 0.0912379              | 12.2173    | 0.960535  | 1         |
| XLOC_027949      | 0.266281  | 0.127533               | 0          | 1         | 1         |
| Tspan11_j3       | 0.203634  | 0.110934               | -0.876278  | 0.411704  | 0.730802  |
| Foxm1            | 0.0520365 | 0.0867927              | 0.738051   | 0.312516  | 1         |
| Nrip2_j2         | 3.4947    | 1.99454                | 0          | 1         | 1         |
| Loh12cr1_j2      | 8.39567   | 7.50704                | -0.161401  | 0.398677  | 0.722617  |
| Crebl2_j2        | 0.292474  | 0.378396               | 0          | 1         | 1         |
| Crebl2_j1        | 3.39899   | 2.1177                 | 0          | 1         | 1         |
| AK012387         | 0.119923  | 0.269854               | 1.17007    | 0.149835  | 0.479601  |
| 8430419L09Rik_j4 | 5.25096   | 6.14313                | 0          | 1         | 1         |
| Plekha5_j12      | 10.1457   | 10.6433                | 0.0690856  | 0.609426  | 0.846192  |



|                  |           |           |               |           |           |
|------------------|-----------|-----------|---------------|-----------|-----------|
| Golt1b_j1        | 0.325644  | 0.48275   | 0.567978      | 0.25853   | 0.607334  |
| AK043509_j2      | 0.0715467 | 0.0874509 | 0.289589      | 0.724236  | 1         |
| AK039595         | 0.0956631 | 0.132693  | 0.472062      | 0.647416  | 1         |
| Sspn_j1          | 0         | 0.616799  | 0             | 1         | 1         |
| Stk38l_j7        | 0.13928   | 0.0404143 | -1.78505      | 0.333046  | 0.674032  |
| Arntl2_j9        | 0.0753023 | 0.287134  | 1.93096       | 0.0735767 | 0.326919  |
| Arntl2_j10       | 0.34189   | 0.397434  | 0.217185      | 0.717057  | 0.897869  |
| Sgce_j1          | 1.13615   | 1.29343   | 0             | 1         | 1         |
| Sgce_j6          | 2.64751   | 1.84552   | 0             | 1         | 1         |
| Pon2_j2          | 1.64941   | 3.09701   | 0.908925      | 0.0086765 | 0.0770969 |
| Asns_j3          | 0.63879   | 1.25995   | 0             | 1         | 1         |
| Asns_j4          | 11.7868   | 6.98777   | 0             | 1         | 1         |
| Col28a1_j7       | 0.111176  | 0.162433  | 0             | 1         | 1         |
| Col28a1_j8       | 0.357076  | 0         | 0             | 1         | 1         |
| Ica1_j3          | 0.222092  | 0         | 0             | 1         | 1         |
| Ica1_j4          | 2.88176   | 2.58328   | 0             | 1         | 1         |
| XLOC_028052      | 0.0549596 | 0.053728  | -0.0326956    | 1         | 1         |
| Tmem168_j2       | 3.35605   | 2.9766    | 0             | 1         | 1         |
| Gpr85_j2         | 0.650501  | 1.44908   | 0             | 1         | 1         |
| 2610001J05Rik_j2 | 23.3638   | 30.8745   | 0.402143      | 0.001845  | 0.0234365 |
| Tspan12_j2       | 0.100071  | 0         | -1.79769e+308 | 0.0060286 | 1         |
| Cadps2_j1        | 0.838585  | 0.820133  | 0             | 1         | 1         |
| Cadps2           | 0.291562  | 0         | 0             | 1         | 1         |
| Ndufa5_j4        | 26.6848   | 22.7937   | 0             | 1         | 1         |
| Pot1a_j2         | 1.97982   | 2.2527    | 0             | 1         | 1         |
| Pot1a_j3         | 1.24295   | 1.23767   | 0             | 1         | 1         |
| Grm8_j4          | 0.981639  | 0.475148  | -1.04681      | 0.0020242 | 0.0252268 |
| Grm8_j5          | 0.757856  | 0.789487  | 0.0589934     | 0.842691  | 0.950279  |
| Zfp800_j8        | 0.383671  | 0.239202  | -0.681638     | 0.24146   | 0.588512  |
| Gcc1             | 0.418052  | 0         | -1.79769e+308 | 2.30E-18  | 6.22E-16  |
| Rbm28_j2         | 0.0675884 | 0.716462  | 3.40604       | 1.03E-07  | 5.54E-06  |
| Prmt4_j1         | 0.21902   | 1.21E-05  | -14.1442      | 0.985839  | 0.995741  |
| Impdh1           | 12.3904   | 10.0886   | 0             | 1         | 1         |
| Impdh1           | 11.812    | 9.97845   | 0             | 1         | 1         |
| Tmem209_j4       | 1.14406   | 1.59748   | 0             | 1         | 1         |
| AK085764         | 0.271195  | 0.331618  | 0             | 1         | 1         |
| Wdr91_j4         | 0.60978   | 0.783719  | 0.362049      | 0.0564354 | 0.278029  |
| Wdr91_j2         | 0.220559  | 0.158113  | -0.480216     | 0.165556  | 0.502234  |
| Cnot4_j3         | 0.159686  | 0.124905  | 0             | 1         | 1         |
| Slc13a4_j1       | 0.508296  | 0.715159  | 0.492595      | 0.304989  | 0.65013   |
| Slc13a4_j2       | 0.159539  | 6.84E-05  | -11.1881      | 0.953319  | 0.986435  |
| Mtpn_j1          | 28.6144   | 27.8092   | 0             | 1         | 1         |
| 9330158H04Rik_j1 | 0.408624  | 0.170513  | -1.26089      | 0.322786  | 0.665874  |
| 9330158H04Rik_j2 | 0.0526517 | 0.170234  | 1.69296       | 0.411705  | 0.730802  |
| Ptn_j2           | 1.94437   | 0.779558  | 0             | 1         | 1         |
| Dgki_j1          | 1.52241   | 1.0964    | -0.473586     | 0.0045827 | 0.0475434 |
| Creb3l2_j3       | 0.930435  | 0.387689  | 0             | 1         | 1         |

|                  |             |           |           |           |           |
|------------------|-------------|-----------|-----------|-----------|-----------|
| Svopl_j1         | 0.216539    | 0.380212  | 0.812178  | 0.149362  | 0.478596  |
| D630045J12Rik_j4 | 0.242588    | 0         | 0         | 1         | 1         |
| D630045J12Rik_j2 | 0.500626    | 0.743858  | 0         | 1         | 1         |
| Zc3hav1_j6       | 0.123668    | 0.0369256 | 0         | 1         | 1         |
| Zc3hav1          | 0.981705    | 1.36322   | 0         | 1         | 1         |
| Klrg2_j4         | 0.304319    | 0.381627  | 0.326576  | 0.28713   | 0.635532  |
| Klrg2_j3         | 0.13954     | 0.0525058 | -1.41014  | 0.0753689 | 0.331407  |
| Klrg2            | 0.764557    | 0.484891  | -0.656963 | 0.0281259 | 0.177947  |
| Dennd2a_j6       | 0           | 0.0512053 | 0         | 1         | 1         |
| Braf_j1          | 0.459575    | 0.357597  | 0         | 1         | 1         |
| Braf_j3          | 0.816199    | 0.684993  | 0         | 1         | 1         |
| Braf_j2          | 0.375895    | 0.378569  | 0         | 1         | 1         |
| E330009J07Rik_j1 | 1.18114     | 1.60816   | 0         | 1         | 1         |
| Fam115a_j3       | 3.74994     | 2.17714   | 0         | 1         | 1         |
| Fam115a_j2       | 0.547956    | 5.38324   | 0         | 1         | 1         |
| Tpk1_j1          | 0.00060174  | 0.462966  | 9.58755   | 0.544807  | 0.811727  |
| Tpk1_j2          | 0.361617    | 0.15163   | -1.25391  | 0.0901353 | 0.368628  |
| Ezh2_j10         | 0.191306    | 0.333101  | 0.800081  | 0.373242  | 0.706161  |
| Ezh2_j11         | 0.0469376   | 0.437424  | 3.22022   | 0.0004194 | 0.0070347 |
| Pdia4_j1         | 5.99301     | 8.4466    | 0.495088  | 0.0034161 | 0.0381792 |
| Zfp777_j3        | 0.956296    | 0.846636  | 0         | 1         | 1         |
| Zfp746_j5        | 0.000560481 | 0.224269  | 0         | 1         | 1         |
| Zfp746_j3        | 1.69105     | 2.89212   | 0         | 1         | 1         |
| Zfp467           | 0.350105    | 0.277705  | -0.334231 | 0.510822  | 0.791332  |
| Rarres2_j3       | 0.960588    | 2.81026   | 0         | 1         | 1         |
| Tmem176b_j4      | 27.6619     | 24.468    | 0         | 1         | 1         |
| Osbpl3_j2        | 8.66245     | 10.7292   | 0         | 1         | 1         |
| Osbpl3_j3        | 4.48716     | 5.81495   | 0         | 1         | 1         |
| Osbpl3_j5        | 0.960352    | 0.725186  | 0         | 1         | 1         |
| Osbpl3_j6        | 32.2137     | 29.3301   | 0         | 1         | 1         |
| Hnrnpa2b1_j3     | 21.8769     | 26.2824   | 0.264692  | 0.0272462 | 0.174397  |
| Hnrnpa2b1_j4     | 6.40532     | 4.5076    | -0.506911 | 0.0008976 | 0.0131383 |
| Hoxa3_j2         | 0.151781    | 0.134575  | 0         | 1         | 1         |
| Hoxa4            | 1.35556     | 1.406     | 0.0527089 | 0.852771  | 0.953351  |
| Hoxa7_j1         | 1.52675     | 0.766481  | 0         | 1         | 1         |
| Hoxa7_j7         | 1.31626     | 1.29957   | 0         | 1         | 1         |
| Hoxa9_j2         | 8.87814     | 8.12283   | 0         | 1         | 1         |
| Hoxa9_j6         | 10.8142     | 11.1168   | 0         | 1         | 1         |
| Hoxa10           | 4.85832     | 4.86595   | 0         | 1         | 1         |
| 9130019P16Rik_j1 | 0.35252     | 0.287489  | 0         | 1         | 1         |
| Scrn1_j3         | 7.15457     | 7.45628   | 0         | 1         | 1         |
| Pde1c            | 2.42364     | 4.34602   | 0         | 1         | 1         |
| Kbtbd2_j1        | 3.09273     | 5.26156   | 0         | 1         | 1         |
| Kbtbd2           | 16.348      | 10.4727   | 0         | 1         | 1         |
| Ppm1k_j4         | 0.0186661   | 0.0979094 | 2.39103   | 0.506607  | 1         |
| XLOC_028190      | 0.171085    | 0.0659151 | -1.37603  | 0.121527  | 0.434092  |
| Hpgds_j2         | 0.0634349   | 0.0553887 | -0.195686 | 0.885528  | 1         |

|                  |             |           |               |           |           |
|------------------|-------------|-----------|---------------|-----------|-----------|
| Rmnd5a_j2        | 9.81776     | 10.4159   | 0             | 1         | 1         |
| Kdm3a_j1         | 0.318345    | 0.239899  | -0.408163     | 0.413333  | 0.732145  |
| Kdm3a_j2         | 0           | 0.0517358 | 1.79769e+308  | 0.0411114 | 1         |
| Mrpl35_j1        | 41.337      | 48.8756   | 0             | 1         | 1         |
| Ptcd3_j6         | 2.45677     | 2.20991   | 0             | 1         | 1         |
| Rnf181_j2        | 10.4526     | 6.64871   | 0             | 1         | 1         |
| Rnf181_j1        | 3.53745     | 3.54845   | 0             | 1         | 1         |
| Vamp8            | 0           | 1.09406   | 1.79769e+308  | 0.0001887 | 0.0036547 |
| Mat2a            | 0.806123    | 0.78802   | -0.0327673    | 0.881195  | 0.9623    |
| Sh2d6_j1         | 0.000322877 | 0.346389  | 10.0672       | 0.93599   | 0.980349  |
| Elmod3_j1        | 1.91993     | 1.57309   | -0.287448     | 0.0271023 | 0.173886  |
| Tcf7l1           | 0.863824    | 0.641283  | -0.429775     | 0.174401  | 0.512384  |
| Tmsb10_j1        | 0.101925    | 0.0945254 | -0.108729     | 0.95916   | 1         |
| Tmsb10           | 3.90472     | 4.40804   | 0.174916      | 0.619794  | 0.850855  |
| Dnahc6_j1        | 0.187073    | 0.268116  | 0.519256      | 0.614908  | 0.847925  |
| Dnahc6_j5        | 0.0756248   | 0.0470101 | -0.685889     | 0.496165  | 1         |
| Dnahc6_j14       | 0.0823477   | 0.0634764 | -0.375508     | 0.754255  | 1         |
| Ctnna2_j1        | 2.66038     | 0         | 0             | 1         | 1         |
| Ctnna2_j14       | 0.0228958   | 0.455492  | 0             | 1         | 1         |
| Sema4f_j2        | 6.79051     | 5.07155   | 0             | 1         | 1         |
| Dok1_j2          | 1.51893     | 0.835968  | -0.861532     | 0.0185943 | 0.134058  |
| AK161590_j3      | 0.0840701   | 0         | -1.79769e+308 | 0.0055104 | 1         |
| Wbp1_j3          | 0.0394721   | 0.0935673 | 0             | 1         | 1         |
| Cd207            | 0.142036    | 0.353555  | 1.31568       | 0.0336359 | 0.200495  |
| Exoc6b_j1        | 3.11938     | 3.73226   | 0             | 1         | 1         |
| Sfxn5_j1         | 2.74272     | 2.97853   | 0             | 1         | 1         |
| Rab11fip5_j1     | 34.7828     | 44.9033   | 0             | 1         | 1         |
| Fbxo41_j1        | 4.75011     | 4.41132   | 0             | 1         | 1         |
| 1700019G17Rik_j1 | 0.165186    | 0.386002  | 1.22452       | 0.017844  | 0.130129  |
| 1700019G17Rik    | 1.22559     | 1.02379   | -0.259552     | 0.256866  | 0.60573   |
| Dusp11_j7        | 0.367808    | 0.661908  | 0             | 1         | 1         |
| AK079912         | 0.395333    | 0.406069  | 0.0386556     | 0.961786  | 0.989212  |
| Aplf_j2          | 0.393001    | 0.30876   | -0.34805      | 0.531421  | 0.803508  |
| AK131825_j4      | 0.0848258   | 0         | -1.79769e+308 | 0.0426511 | 1         |
| AK131825_j1      | 0.116262    | 0.253734  | 1.12593       | 0.165743  | 0.502417  |
| Cnbp_j2          | 0.259262    | 0.72204   | 0             | 1         | 1         |
| Abtb1_j3         | 9.36993     | 7.03694   | 0             | 1         | 1         |
| Podxl2_j1        | 0.264976    | 0.350058  | 0.401735      | 0.585674  | 0.834044  |
| Ccdc37_j3        | 0.279545    | 0.546354  | 0.966755      | 0.0012732 | 0.0173497 |
| Ccdc37_j2        | 0.325441    | 0.523356  | 0.685395      | 0.0606245 | 0.290208  |
| Ccdc37_j1        | 0.115613    | 0         | -1.79769e+308 | 6.17E-06  | 1         |
| lqsec1_j5        | 0           | 0.0500248 | 0             | 1         | 1         |
| Chchd4_j1        | 5.62339     | 4.92078   | 0             | 1         | 1         |
| Grip2_j9         | 1.12431     | 1.32554   | 0             | 1         | 1         |
| Grip2_j8         | 0.537823    | 0.688211  | 0             | 1         | 1         |
| Grip2_j10        | 0           | 0.049133  | 0             | 1         | 1         |
| Prickle2_j5      | 0           | 0.940553  | 0             | 1         | 1         |

|                  |           |                 |              |           |           |
|------------------|-----------|-----------------|--------------|-----------|-----------|
| Adamts9_j6       | 0.127255  | 0.380952        | 1.58189      | 0.0004749 | 0.0077948 |
| Magi1_j4         | 1.3742    | 1.1182          | 0            | 1         | 1         |
| Magi1_j10        | 2.46572   | 1.70487         | 0            | 1         | 1         |
| Fam19a4_j4       | 1.71279   | 1.07353         | 0            | 1         | 1         |
| A130022J15Rik_j1 | 2.06954   | 2.2075          | 0.0931024    | 0.671755  | 0.876082  |
| Tmf1_j2          | 4.98989   | 5.06826         | 0            | 1         | 1         |
| Uba3             | 40.5534   | 37.7063         | 0            | 1         | 1         |
| Frmd4b_j6        | 0.649488  | 0.44189         | -0.555615    | 0.0748488 | 0.330073  |
| Gm765_j1         | 47.1047   | 31.0865         | 0            | 1         | 1         |
| Foxp1_j2         | 0.14429   | 0.000177227     | 0            | 1         | 1         |
| Foxp1_j1         | 0.213088  | 0.235394        | 0            | 1         | 1         |
| Foxp1_j5         | 0.515597  | 0.381117        | 0            | 1         | 1         |
| Eif4e3_j1        | 2.6878    | 1.79488         | 0            | 1         | 1         |
| Cntn3_j1         | 0.384704  | 0.348539        | -0.142428    | 0.768435  | 0.921133  |
| Crbn_j1          | 0.617207  | 0.49514         | 0            | 1         | 1         |
| Crbn             | 36.3709   | 26.6923         | 0            | 1         | 1         |
| Rad18_j2         | 0.305374  | 0 -1.79769e+308 |              | 2.25E-12  | 3.04E-10  |
| Srgap3_j1        | 1.47549   | 0 -1.79769e+308 |              | 9.36E-49  | 3.33E-46  |
| Lhfpl4_j2        | 0.142694  | 0.0382815       | 0            | 1         | 1         |
| AK016007_j1      | 0.622657  | 0.42575         | -0.548432    | 0.406568  | 0.727764  |
| Camk1_j3         | 12.3755   | 34.1372         | 0            | 1         | 1         |
| Rpusd3_j1        | 0.780699  | 0.761958        | -0.0350542   | 0.935777  | 0.98034   |
| Rpusd3           | 2.45118   | 2.42625         | -0.0147528   | 0.948126  | 0.984981  |
| Prmt3            | 6.00915   | 2.32699         | -1.3687      | 0         | 0         |
| Tmem111_j1       | 0.241862  | 0.160086        | 0            | 1         | 1         |
| Atp2b2_j9        | 0.939047  | 0.779105        | 0            | 1         | 1         |
| Raf1_j1          | 6.63908   | 7.10002         | 0            | 1         | 1         |
| Tmem40           | 0.114065  | 0.454243        | 1.99361      | 0.020556  | 0.143588  |
| BC060267_j2      | 0.14715   | 0.535998        | 1.86494      | 0.0169149 | 0.125322  |
| Mbd4_j7          | 0         | 0.102687        | 1.79769e+308 | 0.0132967 | 1         |
| Plxnd1_j5        | 9.68993   | 9.56418         | 0            | 1         | 1         |
| Plxnd1_j6        | 0.0516191 | 0               | 0            | 1         | 1         |
| Tmcc1_j1         | 0.180858  | 0               | 0            | 1         | 1         |
| AK020619_j1      | 0.10984   | 0.123942        | 0.174264     | 0.859995  | 1         |
| Zfp422           | 6.0627    | 6.72664         | 0.149927     | 0.292739  | 0.639709  |
| Rassf4_j1        | 0.849918  | 0.702595        | 0            | 1         | 1         |
| Csgalnact2_j1    | 0         | 0.420977        | 0            | 1         | 1         |
| Ret_j2           | 7.97982   | 8.18079         | 0            | 1         | 1         |
| Ret_j10          | 151.861   | 193.221         | 0            | 1         | 1         |
| Zfp248_j3        | 0.734863  | 0.957252        | 0            | 1         | 1         |
| Zfp248_j2        | 1.7224    | 1.69649         | 0            | 1         | 1         |
| Cacna1c_j5       | 1.23474   | 0.975339        | 0            | 1         | 1         |
| Erc1_j10         | 0.711154  | 0.952496        | 0            | 1         | 1         |
| Wnk1_j7          | 11.2965   | 17.4499         | 0            | 1         | 1         |
| Ccdc77_j1        | 0.308716  | 0.329732        | 0.0950166    | 0.86203   | 0.956374  |
| Ccdc77_j2        | 0.262236  | 0.401164        | 0.613328     | 0.189761  | 0.531612  |
| Cecr5_j5         | 0.579878  | 0.497001        | 0            | 1         | 1         |

|             |           |                       |            |           |           |
|-------------|-----------|-----------------------|------------|-----------|-----------|
| Atp6v1e1_j4 | 39.8925   | 37.3876               | 0          | 1         | 1         |
| Mical3_j1   | 6.87742   | 7.34211               | 0.0943279  | 0.448729  | 0.755217  |
| Mical3_j2   | 0         | 0.21058 1.79769e+308  |            | 2.34E-05  | 0.0006308 |
| Iqsec3_j1   | 0.222775  | 0.148569              | 0          | 1         | 1         |
| Rimklb_j1   | 0.34735   | 0.202243              | -0.780302  | 0.0648269 | 0.302871  |
| Rimklb      | 0         | 0.157924 1.79769e+308 |            | 0.0003749 | 0.0064286 |
| Apobec1     | 1.07266   | 1.52395               | 0.506625   | 0.0443587 | 0.240199  |
| Slc2a3_j6   | 0.59808   | 1.52756               | 0          | 1         | 1         |
| Slc2a3_j2   | 0.0515117 | 0.667552              | 0          | 1         | 1         |
| Slc2a3_j3   | 0.53199   | 0.968717              | 0          | 1         | 1         |
| Pex5_j1     | 0.502319  | 1.18787               | 0          | 1         | 1         |
| Clstn3_j1   | 7.7044    | 10.0262               | 0.380021   | 0.0285519 | 0.179787  |
| C1s_j3      | 0.0329917 | 0.130948              | 1.98882    | 0.169072  | 1         |
| C1s_j1      | 0.179844  | 0.475319              | 1.40215    | 0.0288949 | 0.181085  |
| Emg1_j1     | 9.61362   | 11.1042               | 0.207947   | 0.104268  | 0.400573  |
| Atn1_j4     | 3.83098   | 4.20516               | 0          | 1         | 1         |
| Atn1        | 16.5171   | 15.6145               | 0          | 1         | 1         |
| Atn1_j3     | 6.86565   | 6.9051                | 0          | 1         | 1         |
| Eno2_j1     | 255.72    | 233.251               | 0          | 1         | 1         |
| Usp5_j4     | 0         | 1.50673               | 0          | 1         | 1         |
| Usp5_j5     | 4.15837   | 2.20345               | 0          | 1         | 1         |
| Leprel2_j6  | 0.504687  | 0.371595              | -0.441657  | 0.329444  | 0.671701  |
| Gpr162_j1   | 3.37101   | 3.8307                | 0.184426   | 0.498766  | 0.78413   |
| Gpr162      | 5.04132   | 4.1563                | -0.278503  | 0.0660155 | 0.306719  |
| Lag3_j11    | 0.0828948 | 3.02E-05              | -11.4228   | 0.986699  | 1         |
| Ptms_j1     | 210.03    | 174.305               | 0          | 1         | 1         |
| Ptms_j3     | 1.69524   | 0.933885              | 0          | 1         | 1         |
| Cops7a_j3   | 3.24459   | 5.36675               | 0          | 1         | 1         |
| Cops7a_j2   | 11.6959   | 10.4494               | 0          | 1         | 1         |
| Ncapd2_j3   | 0.697091  | 0.895203              | 0.360868   | 0.0769691 | 0.335484  |
| Ntf3        | 0.526522  | 0.201229              | -1.38766   | 0.0328735 | 0.197472  |
| XLOC_028410 | 4.26476   | 4.83043               | 0.179687   | 0.342115  | 0.681894  |
| Ndufa9_j2   | 8.88685   | 5.37782               | 0          | 1         | 1         |
| Rad51ap1_j2 | 0.0813424 | 0.0790273             | -0.0416567 | 0.973862  | 1         |
| XLOC_028420 | 0.529174  | 0.487162              | 0          | 1         | 1         |
| AK033854    | 0.466773  | 0.492703              | 0          | 1         | 1         |
| Fkbp4_j3    | 6.29004   | 3.60424               | 0          | 1         | 1         |
| BC048546_j3 | 1.03441   | 0.534102              | 0          | 1         | 1         |
| AK036632_j1 | 0.0925018 | 0.135519              | 0.550943   | 0.640708  | 1         |
| Clec1a_j2   | 0.0483305 | 0.0035028             | -3.78635   | 0.308979  | 1         |
| Gm5886      | 0.088343  | 0.168653              | 0.932874   | 0.410096  | 0.730173  |
| Lrp6_j1     | 2.51188   | 1.6362                | 0          | 1         | 1         |
| Gpr19       | 4.73153   | 6.49505               | 0.457033   | 0.0078478 | 0.0715464 |
| Gpr19       | 2.56476   | 3.61386               | 0.494713   | 0.031438  | 0.191565  |
| Hebp1_j1    | 1.67516   | 1.84786               | 0.141556   | 0.707423  | 0.89332   |
| Wbp11_j2    | 0.152036  | 2.17908               | 0          | 1         | 1         |
| Art4_j1     | 0         | 0.18066 1.79769e+308  |            | 0.004571  | 0.047472  |

|                  |           |                 |            |           |           |
|------------------|-----------|-----------------|------------|-----------|-----------|
| Art4             | 0.712379  | 0.543593        | -0.390117  | 0.178739  | 0.518255  |
| Arhgdib          | 0.0813399 | 0.250491        | 1.62273    | 0.17617   | 0.514817  |
| Arhgdib          | 1.32322   | 2.40418         | 0.861495   | 0.0028224 | 0.032824  |
| Arhgdib_j1       | 0.321134  | 0.672174        | 1.06566    | 0.147343  | 0.476     |
| Slc15a5_j6       | 0.0405263 | 0.085218        | 1.0723     | 0.551456  | 1         |
| Slco1a4_j11      | 0.471448  | 0.414511        | -0.185688  | 0.70991   | 0.894313  |
| Slco1a4_j9       | 0.626829  | 0.00010894      | -12.4903   | 0.919105  | 0.974692  |
| Slco1a4_j12      | 1.02195   | 0.922879        | -0.147114  | 0.65047   | 0.865852  |
| Slco1a5_j1       | 0.275594  | 0.23544         | -0.227182  | 0.661781  | 0.871768  |
| Ldhb_j2          | 38.7153   | 31.5819         | 0          | 1         | 1         |
| Bcat1_j2         | 9.06422   | 10.2302         | 0          | 1         | 1         |
| Bcat1            | 3.49046   | 10.9606         | 0          | 1         | 1         |
| XLOC_028486      | 0.114692  | 0.107806        | -0.0893255 | 0.91394   | 1         |
| Tm7sf3_j1        | 0.676163  | 0.924591        | 0          | 1         | 1         |
| Gm15767          | 0.173326  | 0.563934        | 1.70204    | 0.0108383 | 0.0907771 |
| Ergic2           | 0.625746  | 0.415878        | 0          | 1         | 1         |
| Tmtc1_j4         | 16.352    | 15.0196         | 0          | 1         | 1         |
| Tmtc1            | 13.1063   | 11.1235         | 0          | 1         | 1         |
| Ipo8_j3          | 3.64641   | 4.16974         | 0          | 1         | 1         |
| Amn1_j1          | 9.52214   | 10.2994         | 0.113203   | 0.518885  | 0.796709  |
| Ppp1r9a          | 0.519736  | 0.334441        | 0          | 1         | 1         |
| Neurabin_j10     | 0.684422  | 0.370522        | 0          | 1         | 1         |
| Neurabin_j12     | 2.64512   | 2.54137         | 0          | 1         | 1         |
| Dync1i1_j1       | 8.13941   | 6.08604         | 0          | 1         | 1         |
| Tac1_j5          | 158.451   | 170.762         | 0.107954   | 0.222101  | 0.569314  |
| XLOC_027565      | 0.132232  | 0.0642563       | -1.04116   | 0.349826  | 1         |
| Gig18            | 0.463986  | 0.544037        | 0.229623   | 0.498074  | 0.783887  |
| Glcci1_j6        | 0.0563447 | 0 -1.79769e+308 |            | 0.0420202 | 1         |
| Glcci1_j10       | 2.23425   | 1.23909         | 0          | 1         | 1         |
| Nxph1_j3         | 0.350683  | 0 -1.79769e+308 |            | 7.71E-07  | 3.31E-05  |
| Mdfic_j1         | 1.5471    | 0.93637         | 0          | 1         | 1         |
| AK052888_j1      | 0.0682472 | 3.55E-06        | -14.229    | 0.997392  | 1         |
| AK081964         | 0.152961  | 0.171358        | 0.163857   | 0.794308  | 0.931391  |
| Cav1_j3          | 4.50091   | 5.25795         | 0          | 1         | 1         |
| Met_j1           | 0.166845  | 0.0953428       | -0.807311  | 0.345611  | 0.684965  |
| A430107O13Rik_j4 | 0.0930709 | 0.0581106       | -0.679527  | 0.407562  | 1         |
| Wnt16_j1         | 0.240417  | 0.152166        | -0.659898  | 0.447219  | 0.753936  |
| Ptprz1_j5        | 4.63095   | 3.50584         | 0          | 1         | 1         |
| XLOC_027592      | 0.0721849 | 0.110535        | 0.614731   | 0.532501  | 1         |
| Gm3294_j2        | 0.150993  | 0 -1.79769e+308 |            | 0.0073637 | 0.0683867 |
| Gm3294_j1        | 0.0902124 | 0 -1.79769e+308 |            | 0.0270806 | 1         |
| Ahcyl2_j5        | 2.62637   | 0.000680145     | 0          | 1         | 1         |
| Ahcyl2_j7        | 9.52633   | 8.20332         | 0          | 1         | 1         |
| AK006282         | 0.138887  | 0.265102        | 0.932633   | 0.166165  | 0.502787  |
| BB283400         | 0.1728    | 0.184159        | 0.0918436  | 0.896461  | 0.967019  |
| Mkln1_j1         | 1.53001   | 2.10418         | 0          | 1         | 1         |
| Mkln1_j2         | 1.79198   | 1.58643         | 0          | 1         | 1         |

|                       |           |                 |            |           |          |
|-----------------------|-----------|-----------------|------------|-----------|----------|
| Mkln1_j3              | 0.180383  | 0               | 0          | 1         | 1        |
| AK080631_j3           | 0.0958028 | 0.0791209       | -0.276008  | 0.770497  | 1        |
| Lrguk_j3              | 0.192016  | 0 -1.79769e+308 | 0.0052083  | 0.0523072 |          |
| Lrguk                 | 0.0555644 | 0.0226705       | -1.29334   | 0.368167  | 1        |
| Lrguk_j7              | 0.139023  | 0.0957351       | -0.538204  | 0.535101  | 0.806052 |
| Gm14546_j1            | 0.114061  | 0.033405        | -1.77167   | 0.345229  | 1        |
| Tmem140               | 2.40518   | 2.603           | 0.114028   | 0.547408  | 0.813648 |
| XLOC_027632           | 0.125845  | 0.0447161       | -1.49278   | 0.398127  | 1        |
| Nup205                | 1.54132   | 1.4084          | 0          | 1         | 1        |
| Nup205_j1             | 0.498811  | 0.609014        | 0          | 1         | 1        |
| Chrm2_j1              | 0.248275  | 0.109112        | -1.18613   | 0.0261659 | 0.169756 |
| XLOC_027637           | 0.167971  | 0.132029        | -0.34736   | 0.675327  | 0.877609 |
| Luc7l2_j6             | 0.235931  | 0.188366        | 0          | 1         | 1        |
| Tbxas1_j1             | 0.0809776 | 0 -1.79769e+308 | 0.0146934  |           | 1        |
| Agk_j4                | 0.222115  | 0.089778        | -1.30687   | 0.295506  | 0.642128 |
| XLOC_027651           | 0.123142  | 0.0384194       | -1.68041   | 0.16806   | 1        |
| Ssbp1_j3              | 0.428013  | 0.209202        | -1.03275   | 0.211436  | 0.556171 |
| Ssbp1_j2              | 2.28107   | 1.71643         | -0.410306  | 0.131435  | 0.451337 |
| TCRBVbeta5.1/Jbeta1.5 | 0.194151  | 0.191154        | -0.0224458 | 0.979781  | 0.994006 |
| Ephb6_j2              | 0.566131  | 0.548108        | -0.0466768 | 0.928366  | 0.977919 |
| Casp2_j1              | 0.296216  | 0.43149         | 0          | 1         | 1        |
| Casp2_j2              | 0.151015  | 0.181277        | 0          | 1         | 1        |
| Zyx                   | 0.368661  | 0               | 0          | 1         | 1        |
| Arhgef5_j5            | 0.067388  | 0.0192671       | -1.80636   | 0.351882  | 1        |
| Arhgef5_j8            | 0.117098  | 0 -1.79769e+308 | 0.0344122  |           | 1        |
| Cntnap2_j1            | 0.340857  | 0.24173         | -0.495769  | 0.374178  | 0.706986 |
| Cntnap2               | 13.6363   | 10.0974         | 0          | 1         | 1        |
| XLOC_027665           | 0.502242  | 0.317831        | -0.660122  | 0.3055    | 0.6507   |
| XLOC_027665           | 0.571978  | 0.743617        | 0.378601   | 0.376223  | 0.708274 |
| mKIAA4190             | 0.213046  | 0.164549        | -0.372651  | 0.547134  | 0.813465 |
| mKIAA4190_j2          | 0.381189  | 0.275856        | -0.466591  | 0.317596  | 0.660897 |
| Krba1_j1              | 0.112697  | 0.0361398       | -1.64079   | 0.112096  | 1        |
| Sspo_j1               | 0.138942  | 0.0415764       | -1.74064   | 0.0361942 | 0.210104 |
| Atp6v0e2_j1           | 93.904    | 83.9724         | -0.161272  | 0.140486  | 0.466174 |
| Repin1_j3             | 0.328372  | 0.380518        | 0.212633   | 0.618564  | 0.850136 |
| AI854703_j9           | 0.7335    | 0.596023        | -0.299429  | 0.396238  | 0.721006 |
| Gimap9                | 0.209349  | 0.19957         | -0.0690165 | 0.917914  | 0.974435 |
| Tmem176a_j4           | 0.0776859 | 0.0215342       | 0          | 1         | 1        |
| Gpnmb_j1              | 0.316087  | 0.0326657       | -3.27447   | 0.0146616 | 0.113081 |
| 2410003K15Rik_j8      | 0.693854  | 0.711442        | 0.0361132  | 0.909462  | 0.971343 |
| Mpp6_j1               | 1.56515   | 1.72151         | 0.137371   | 0.627607  | 0.854742 |
| Mpp6                  | 0.146637  | 0.0494751       | -1.56748   | 0.0303112 | 0.18699  |
| Mpp6_j3               | 0.178694  | 0.0789738       | -1.17805   | 0.0433358 | 0.236236 |
| XLOC_027689           | 0.193825  | 0.0812287       | -1.25469   | 0.146601  | 0.47498  |
| XLOC_027689           | 0.0823317 | 0 -1.79769e+308 | 0.0335079  |           | 1        |
| AK043004_j7           | 0.231479  | 0.192004        | -0.26975   | 0.762894  | 0.918329 |
| AK043004_j6           | 0.148781  | 0 -1.79769e+308 | 0.0034494  | 0.0384895 |          |

|               |           |                 |            |           |           |
|---------------|-----------|-----------------|------------|-----------|-----------|
| Nfe2l3_j1     | 3.49667   | 3.37567         | -0.0508063 | 0.66552   | 0.873186  |
| Tax1bp1_j4    | 0.0397668 | 0.0687155       | 0          | 1         | 1         |
| Chn2_j2       | 0.326395  | 0.258973        | 0          | 1         | 1         |
| Gars_j3       | 117.53    | 146.495         | 0.31782    | 0.000223  | 0.0041974 |
| Aqp1_j1       | 0.307198  | 0               | 0          | 1         | 1         |
| Adcyap1r1     | 0.21434   | 0.145301        | -0.56086   | 0.202724  | 0.546379  |
| Herc3_j2      | 5.21214   | 3.68521         | 0          | 1         | 1         |
| Herc3_j4      | 4.66606   | 4.05296         | 0          | 1         | 1         |
| Fam190a_j2    | 0.222449  | 0.188715        | -0.237262  | 0.628871  | 0.855705  |
| XLOC_027723   | 0.0663951 | 0 -1.79769e+308 |            | 0.016291  | 1         |
| Smarcad1_j2   | 1.68074   | 2.15578         | 0          | 1         | 1         |
| C130060K24Rik | 0.230595  | 0.450573        | 0.966399   | 0.0223553 | 0.152336  |
| Prdm5_j3      | 0.179347  | 0 -1.79769e+308 |            | 0.0003865 | 0.006594  |
| Prdm5_j12     | 0.0641653 | 0 -1.79769e+308 |            | 0.0658653 | 1         |
| AK039826_j1   | 0.125267  | 0.0653881       | -0.937902  | 0.272908  | 1         |
| AK039826_j2   | 0.194458  | 0.0787885       | -1.3034    | 0.237484  | 0.584226  |
| Rnf103_j1     | 0.212971  | 0.206074        | 0          | 1         | 1         |
| Vps24_j2      | 1.75689   | 1.59628         | 0          | 1         | 1         |
| Vps24_j4      | 1.17645   | 1.71185         | 0          | 1         | 1         |
| Polr1a_j3     | 0.479729  | 0.438755        | 0          | 1         | 1         |
| Polr1a_j2     | 2.82237   | 2.66615         | 0          | 1         | 1         |
| 0610030E20Rik | 0.427491  | 0.194224        | 0          | 1         | 1         |
| Suclg1_j1     | 0.173272  | 0 -1.79769e+308 |            | 0.009847  | 0.0847616 |
| Lrrtm4        | 0.203526  | 0.19506         | -0.0612925 | 0.930332  | 0.978661  |
| D6Mm5e_j1     | 0.219975  | 0.118756        | -0.889341  | 0.225354  | 0.572449  |
| Aup1_j1       | 15.6733   | 16.8114         | 0.101133   | 0.415332  | 0.733192  |
| Dqx1_j4       | 0.0746203 | 0.0306375       | -1.28427   | 0.490292  | 1         |
| Dqx1_j5       | 1.53594   | 1.93663         | 0.334426   | 0.0433179 | 0.236191  |
| Ccdc142       | 0.0348511 | 0.083468        | 1.26002    | 0.202618  | 1         |
| Rtkn_j5       | 11.5849   | 10.9672         | 0          | 1         | 1         |
| Dctn1_j4      | 11.076    | 10.7618         | 0          | 1         | 1         |
| Nagk_j2       | 0         | 0.211193        | 0          | 1         | 1         |
| Zfml_j6       | 3.99846   | 3.88967         | 0          | 1         | 1         |
| Cct7_j3       | 124.715   | 133.551         | 0.0987559  | 0.252019  | 0.600021  |
| Alms1_j6      | 0.177449  | 0 -1.79769e+308 |            | 0.0011636 | 0.0161276 |
| Alms1_j9      | 0.580712  | 0.0618744       | -3.23041   | 0.0512204 | 0.262124  |
| Tprkb_j1      | 2.52734   | 1.32684         | 0          | 1         | 1         |
| Tgfa_j2       | 0.836428  | 0.56993         | -0.553458  | 0.082275  | 0.34951   |
| Fam136a_j1    | 0.47047   | 0.567725        | 0          | 1         | 1         |
| Snrpg_j3      | 0.105204  | 0.0255694       | -2.0407    | 0.393436  | 1         |
| Snrpg_j2      | 0.137014  | 0.10789         | -0.34477   | 0.80997   | 1         |
| Tia1_j1       | 0.758043  | 1.17451         | 0          | 1         | 1         |
| Tia1_j6       | 1.4769    | 1.17286         | 0          | 1         | 1         |
| Tia1_j8       | 1.87963   | 1.24573         | 0          | 1         | 1         |
| AK005503_j1   | 0.102907  | 0.0301553       | 0          | 1         | 1         |
| Aak1_j4       | 0.315015  | 0.0761936       | 0          | 1         | 1         |
| XLOC_027787   | 0.186768  | 0.200093        | 0          | 1         | 1         |



|                  |             |             |               |           |           |
|------------------|-------------|-------------|---------------|-----------|-----------|
| Nfu1             | 2.02109     | 1.20804     | 0             | 1         | 1         |
| Nfu1_j4          | 3.01288     | 3.58565     | 0             | 1         | 1         |
| Ccdc48_j2        | 0.172412    | 0.0604615   | -1.51177      | 0.0218951 | 0.150018  |
| Ccdc48_j3        | 0           | 0.172978    | 1.79769e+308  | 3.10E-05  | 0.0007952 |
| Ccdc48_j4        | 0.0842896   | 0.157086    | 0.898124      | 0.0964138 | 1         |
| Ccdc48_j5        | 0.136082    | 0.000519818 | -8.03225      | 0.275062  | 1         |
| Copg_j6          | 0.960839    | 0.576715    | 0             | 1         | 1         |
| 8430410A17Rik_j1 | 0.410848    | 0.512442    | 0.318784      | 0.594611  | 0.838568  |
| Gm5577           | 0.18295     | 0           | -1.79769e+308 | 0.0014198 | 0.0189031 |
| XLOC_027797      | 0.227548    | 0.146593    | -0.634356     | 0.390151  | 0.717194  |
| XLOC_027797      | 0.169558    | 0.150342    | -0.173531     | 0.773517  | 0.923145  |
| Ruvbl1_j1        | 0.158897    | 0           | -1.79769e+308 | 0.029217  | 0.182366  |
| Tpra1_j1         | 0.246675    | 0.128844    | 0             | 1         | 1         |
| Txnr3_j1         | 2.06066     | 3.05166     | 0.566492      | 0.007825  | 0.0714322 |
| Klf15_j3         | 0.175544    | 0.300783    | 0.776892      | 0.224476  | 0.571588  |
| Fbln2_j2         | 8.18687     | 7.60926     | 0             | 1         | 1         |
| XLOC_027812      | 0.141762    | 0.0705618   | -1.00651      | 0.25273   | 0.600774  |
| AK043032_j1      | 0.0882959   | 0.217224    | 1.29877       | 0.184751  | 0.525111  |
| AK043032_j2      | 0.100665    | 0.0244681   | -2.04059      | 0.210555  | 1         |
| Kbtbd8_j1        | 0.615668    | 0.502995    | 0             | 1         | 1         |
| Fam19a1_j2       | 5.33964     | 4.04001     | -0.402383     | 0.092598  | 0.374457  |
| Fam19a1_j4       | 0.588827    | 0.220324    | -1.41822      | 0.0010108 | 0.0144352 |
| Arl6ip5_j1       | 72.8445     | 87.553      | 0.265337      | 0.0121944 | 0.0993683 |
| Mitf_j5          | 0.183344    | 0           | -1.79769e+308 | 3.70E-06  | 0.0001303 |
| XLOC_027827      | 0.214636    | 0.149065    | -0.525947     | 0.534843  | 0.805937  |
| Ppp4r2_j1        | 0.0991144   | 0           | -1.79769e+308 | 0.0001565 | 1         |
| Chl1_j3          | 1.2722      | 3.11473     | 0             | 1         | 1         |
| Chl1_j5          | 2.52721     | 5.65361     | 0             | 1         | 1         |
| Chl1_j6          | 6.52664     | 14.0168     | 0             | 1         | 1         |
| Cntn4            | 0.000411474 | 0.217162    | 9.04375       | 0.61919   | 0.850529  |
| Cntn4_j3         | 1.30603     | 1.17883     | -0.147828     | 0.454941  | 0.758773  |
| Cntn4_j4         | 0.331736    | 0.0001465   | -11.1449      | 0.682983  | 0.881291  |
| Cntn4_j5         | 0.357567    | 0.079107    | -2.17634      | 0.0098933 | 0.0850249 |
| Itpr1_j4         | 0.127337    | 0.0956458   | -0.412873     | 0.602364  | 1         |
| Itpr1_j6         | 0.0664032   | 0.0946373   | 0             | 1         | 1         |
| Itpr1_j9         | 0.31123     | 0.222217    | 0             | 1         | 1         |
| Itpr1_j11        | 0.190307    | 0.000524173 | 0             | 1         | 1         |
| Brpf1_j6         | 0.0775307   | 0           | -1.79769e+308 | 0.0022203 | 1         |
| Ttll3_j3         | 0.133617    | 0.197227    | 0             | 1         | 1         |
| Ttll3_j2         | 1.62471     | 1.73846     | 0             | 1         | 1         |
| Arpc4            | 0.0559468   | 0.0664748   | 0             | 1         | 1         |
| Il17rc_j5        | 0.0590779   | 0           | -1.79769e+308 | 0.0077233 | 1         |
| Fancd2_j1        | 0.179406    | 0.0656191   | -1.45104      | 0.0632614 | 0.298274  |
| Fancd2_j9        | 0.133384    | 0           | -1.79769e+308 | 0.0076211 | 1         |
| 6720456B07Rik_j2 | 44.3201     | 56.0601     | 0             | 1         | 1         |
| Irak2_j1         | 0.115315    | 0.046286    | 0             | 1         | 1         |
| Tatdn2_j1        | 4.56309     | 4.81156     | 0             | 1         | 1         |

|               |           |                 |           |           |           |
|---------------|-----------|-----------------|-----------|-----------|-----------|
| Slc6a1_j2     | 0.3927    | 0.000440483     | -9.80012  | 0.617586  | 0.849523  |
| Hrh1_j4       | 0.292776  | 0 -1.79769e+308 |           | 3.59E-07  | 1.66E-05  |
| Cand2         | 0.187096  | 0.239772        | 0.357884  | 0.304525  | 0.650023  |
| D6Wsu116e_j3  | 0.426059  | 0.749639        | 0.815143  | 0.13168   | 0.451686  |
| March8_j9     | 0.311662  | 0               | 0         | 1         | 1         |
| Cxcl12        | 2.56763   | 3.58586         | 0         | 1         | 1         |
| Zfp637_j5     | 1.77799   | 1.96351         | 0.143192  | 0.856386  | 0.954582  |
| XLOC_027885   | 0.0772868 | 0.0551207       | -0.487628 | 0.589558  | 1         |
| XLOC_027885   | 0.167897  | 0.119962        | -0.485007 | 0.446548  | 0.753378  |
| Rasgef1a_j1   | 0.319324  | 0.69351         | 1.11889   | 0.0452553 | 0.243458  |
| Rasgef1a_j3   | 1.2165    | 1.01516         | -0.261019 | 0.464997  | 0.764951  |
| 3110021A11Rik | 0.185021  | 0.138821        | -0.414468 | 0.604619  | 0.843983  |
| Rad52_j6      | 0.0886727 | 0 -1.79769e+308 |           | 0.0323398 | 1         |
| Rad52_j7      | 0.880249  | 0.542337        | -0.698721 | 0.101989  | 0.39572   |
| Rad52_j5      | 0.576606  | 0.671243        | 0.21925   | 0.5908    | 0.836716  |
| Il17ra_j2     | 0.923189  | 1.94157         | 0         | 1         | 1         |
| Cecr2_j3      | 0.217239  | 0 -1.79769e+308 |           | 1.03E-10  | 1.04E-08  |
| Slc25a18_j1   | 0.139155  | 0 -1.79769e+308 |           | 0.0039159 | 0.0422576 |
| Slc25a18      | 1.73599   | 1.46279         | -0.247037 | 0.253114  | 0.601131  |
| Slc6a13       | 0.500363  | 0.416253        | -0.265514 | 0.504707  | 0.787836  |
| Slc6a13_j5    | 0.349956  | 0.180095        | -0.958417 | 0.343375  | 0.683366  |
| Cd163_j4      | 0.259616  | 0.50597         | 0.962674  | 0.0321402 | 0.194457  |
| C1rl          | 0.125451  | 0.0980189       | -0.355998 | 0.697938  | 1         |
| Spsb2         | 0.552097  | 0.861771        | 0.642384  | 0.219169  | 0.565521  |
| Spsb2_j1      | 0.101635  | 0.0492662       | -1.04473  | 0.590011  | 1         |
| Spsb2         | 0.824649  | 1.31403         | 0.672151  | 0.149496  | 0.478977  |
| Chd4_j8       | 1.49513   | 1.32888         | 0         | 1         | 1         |
| Chd4_j13      | 5.41193   | 9.58477         | 0         | 1         | 1         |
| Mrpl51_j1     | 0.243728  | 0.162659        | -0.583423 | 0.175826  | 0.514341  |
| Scnn1a_j5     | 0.123936  | 0.0315074       | -1.97583  | 0.167615  | 1         |
| Ano2_j1       | 0.152551  | 0.0344374       | -2.14724  | 0.165852  | 0.502444  |
| XLOC_027942   | 0.123102  | 0 -1.79769e+308 |           | 0.0026313 | 1         |
| XLOC_027942   | 0.147415  | 0.0636978       | -1.21057  | 0.147587  | 0.476304  |
| XLOC_027942   | 0.0722128 | 0.047114        | -0.616099 | 0.60404   | 1         |
| XLOC_027942   | 0.154798  | 0.086913        | -0.83274  | 0.395243  | 0.720396  |
| Parp11_j2     | 0.77871   | 1.42901         | 0         | 1         | 1         |
| Efcab4b_j1    | 0.0709517 | 0.0597401       | -0.248138 | 0.807133  | 1         |
| Tspan11_j5    | 0.0768268 | 0 -1.79769e+308 |           | 0.0054014 | 1         |
| Etv6_j1       | 0.687353  | 0.4187          | 0         | 1         | 1         |
| Loh12cr1_j1   | 2.78185   | 1.99494         | -0.479696 | 0.331993  | 0.673438  |
| Atf7ip_j1     | 1.62766   | 1.31395         | 0         | 1         | 1         |
| Atf7ip_j4     | 0.982743  | 1.95064         | 0         | 1         | 1         |
| Dera_j1       | 0.314349  | 0 -1.79769e+308 |           | 0.0014717 | 0.0194422 |
| Mgst1_j1      | 4.86677   | 3.8773          | -0.327913 | 0.20188   | 0.545319  |
| Plekha5_j7    | 2.69316   | 2.15192         | -0.323673 | 0.0192968 | 0.137487  |
| Plekha5_j9    | 2.42183   | 2.48751         | 0.0386064 | 0.850968  | 0.952632  |
| Plekha5_j11   | 2.54604   | 2.66476         | 0.0657525 | 0.777561  | 0.924772  |

|                  |           |                 |            |           |           |
|------------------|-----------|-----------------|------------|-----------|-----------|
| Slco1c1          | 0.193815  | 0.0273357       | -2.82582   | 0.0460795 | 0.245899  |
| AK043509_j1      | 0.163003  | 0.0848997       | -0.941067  | 0.18526   | 0.525529  |
| Lrmp_j1          | 0.127492  | 0.142287        | 0.158404   | 0.887296  | 1         |
| Lrmp_j7          | 0.100536  | 0 -1.79769e+308 |            | 0.0002453 | 1         |
| Gm15706_j1       | 1.58341   | 1.26124         | -0.328194  | 0.354439  | 0.690609  |
| Sspn_j4          | 1.00293   | 0.339577        | 0          | 1         | 1         |
| Stk38l_j2        | 0.407496  | 0.25355         | -0.684518  | 0.421129  | 0.737271  |
| Stk38l_j8        | 0.176094  | 0.148843        | -0.242555  | 0.643148  | 0.862219  |
| Arntl2_j4        | 0.162211  | 0.455514        | 1.48963    | 0.0059168 | 0.0578727 |
| Arntl2_j6        | 0.489957  | 0.404376        | -0.27696   | 0.648816  | 0.864842  |
| Mrps35_j1        | 1.37479   | 0.562339        | -1.2897    | 0.0289499 | 0.181277  |
| Klhdc5_j1        | 2.08573   | 3.11704         | 0          | 1         | 1         |
| Klhdc5_j2        | 0.4206    | 0.0620383       | 0          | 1         | 1         |
| Ccdc91_j2        | 0.0808495 | 0               | 0          | 1         | 1         |
| XLOC_028022      | 0.0549816 | 0.0317462       | -0.792366  | 0.620641  | 1         |
| 2810474019Rik_j4 | 0.315952  | 0.33848         | 0.0993692  | 0.774776  | 0.923737  |
| Bicd1_j3         | 0.359644  | 0.45753         | 0          | 1         | 1         |
| Bicd1_j4         | 1.00799   | 1.66472         | 0          | 1         | 1         |
| AK035387         | 0.136153  | 0.052562        | -1.37313   | 0.0860621 | 1         |
| Hepacam2_j1      | 0.0833036 | 0 -1.79769e+308 |            | 0.0098629 | 1         |
| Hepacam2_j2      | 0.114759  | 0.132083        | 0.202832   | 0.793359  | 1         |
| Sgce_j3          | 0.171482  | 0               | 0          | 1         | 1         |
| Pon3_j1          | 0.317977  | 0.283586        | -0.165136  | 0.759432  | 0.91718   |
| Pon2_j1          | 1.01918   | 1.01177         | -0.0105315 | 0.969177  | 0.991369  |
| Shfm1_j1         | 36.3653   | 34.004          | -0.0968585 | 0.667945  | 0.87439   |
| Asns_j2          | 0.688701  | 0.35504         | 0          | 1         | 1         |
| Asns_j6          | 4.7703    | 2.82181         | 0          | 1         | 1         |
| Asns_j7          | 0.640777  | 1.04096         | 0          | 1         | 1         |
| Col28a1_j4       | 1.84781   | 3.20718         | 0          | 1         | 1         |
| Rpa3_j2          | 5.17099   | 3.50283         | -0.56192   | 0.0801019 | 0.344084  |
| Ica1_j1          | 0.187036  | 0               | 0          | 1         | 1         |
| XLOC_028052      | 0.175381  | 0.0907739       | -0.950141  | 0.256007  | 0.604701  |
| Tmem168_j4       | 0.113041  | 0.167741        | 0          | 1         | 1         |
| Gpr85_j3         | 0.104155  | 0               | 0          | 1         | 1         |
| Gpr85            | 0.531787  | 0.323764        | 0          | 1         | 1         |
| Cttnbp2_j1       | 0.138866  | 0.192362        | 0          | 1         | 1         |
| Tspan12_j3       | 0.583978  | 0 -1.79769e+308 |            | 1.80E-08  | 1.20E-06  |
| Tspan12_j4       | 1.64877   | 1.79203         | 0.120201   | 0.629678  | 0.85615   |
| Fam3c_j2         | 3.35095   | 5.88388         | 0          | 1         | 1         |
| Cadps2_j2        | 1.34994   | 1.37589         | 0          | 1         | 1         |
| Cadps2           | 1.31997   | 0.841419        | 0          | 1         | 1         |
| Ndufa5_j1        | 4.53014   | 1.02026         | 0          | 1         | 1         |
| Ndufa5_j2        | 5.92101   | 6.47475         | 0          | 1         | 1         |
| Wasl_j1          | 20.8901   | 19.1125         | 0          | 1         | 1         |
| Pot1a_j1         | 0.301087  | 0.125656        | 0          | 1         | 1         |
| Grm8_j1          | 1.39493   | 0.925237        | -0.592297  | 0.0238757 | 0.159159  |
| Grm8_j2          | 0.171978  | 0 -1.79769e+308 |            | 4.03E-05  | 0.0009941 |

|                   |            |           |               |           |           |
|-------------------|------------|-----------|---------------|-----------|-----------|
| Zfp800_j2         | 0          | 0.438841  | 1.79769e+308  | 8.25E-05  | 0.0018225 |
| Zfp800_j4         | 0.183192   | 0.120354  | -0.606072     | 0.444531  | 0.752164  |
| Zfp800_j6         | 0.146746   | 0.137712  | -0.0916645    | 0.89778   | 0.967468  |
| Gcc1_j1           | 0.571323   | 0.875163  | 0.615244      | 0.0025331 | 0.0301523 |
| XLOC_028077       | 0.118187   | 0.118152  | -0.000425073  | 0.999603  | 1         |
| XLOC_028077       | 0.0689183  | 0.018807  | -1.87362      | 0.349258  | 1         |
| Impdh1_j2         | 0.164272   | 0.0454133 | 0             | 1         | 1         |
| Impdh1_j3         | 0.376745   | 0.169606  | 0             | 1         | 1         |
| Tnpo3_j3          | 4.15011    | 2.79004   | 0             | 1         | 1         |
| Tnpo3_j2          | 4.85129    | 5.20264   | 0             | 1         | 1         |
| Gm2058_j1         | 0.306507   | 0.104766  | -1.54876      | 0.0141637 | 0.110364  |
| Zc3hc1_j1         | 0.159965   | 0         | -1.79769e+308 | 0.0091557 | 0.0802424 |
| Tsga14_j1         | 0.894851   | 0.776689  | 0             | 1         | 1         |
| Copg2_j2          | 3.67254    | 6.29847   | 0             | 1         | 1         |
| Podxl_j3          | 1.4469     | 3.05926   | 0             | 1         | 1         |
| Plxna4_j1         | 13.4387    | 17.0107   | 0             | 1         | 1         |
| XLOC_028101       | 0.305864   | 0.246234  | -0.312862     | 0.644981  | 0.863026  |
| Wdr91_j5          | 4.56106    | 4.48485   | -0.0243095    | 0.838787  | 0.948621  |
| Cnot4_j1          | 0.602701   | 0         | 0             | 1         | 1         |
| Cnot4             | 2.16036    | 1.78821   | 0             | 1         | 1         |
| Dgki_j3           | 15.3496    | 13.1417   | -0.224058     | 0.0122652 | 0.0997838 |
| Svopl_j2          | 0.10148    | 0         | -1.79769e+308 | 0.009432  | 1         |
| D630045J12Rik_j9  | 0.00117597 | 0.812772  | 0             | 1         | 1         |
| D630045J12Rik_j10 | 0.247741   | 0.0883659 | 0             | 1         | 1         |
| D630045J12Rik_j12 | 0.604175   | 0.0269276 | 0             | 1         | 1         |
| Hipk2             | 0.0798474  | 0.163852  | 0             | 1         | 1         |
| Parp12_j2         | 2.29033    | 1.90906   | -0.262694     | 0.238447  | 0.585379  |
| Parp12_j3         | 1.26945    | 1.05196   | -0.27112      | 0.226853  | 0.573979  |
| Jhdm1d            | 0.331004   | 0.348622  | 0             | 1         | 1         |
| Mkrn1             | 2.55245    | 1.68873   | 0             | 1         | 1         |
| Dennd2a_j3        | 0.287796   | 0.0595148 | 0             | 1         | 1         |
| Fam115c_j2        | 0.742034   | 0.638487  | -0.21683      | 0.520641  | 0.797932  |
| Fam115c_j3        | 0.0596058  | 0         | -1.79769e+308 | 0.0047882 | 1         |
| Fam115a           | 11.2522    | 16.8983   | 0             | 1         | 1         |
| Fam115a_j6        | 3.97447    | 0.775085  | 0             | 1         | 1         |
| Ezh2_j1           | 0.160968   | 0.237898  | 0.563571      | 0.369714  | 0.703138  |
| Ezh2_j2           | 0.131243   | 0         | -1.79769e+308 | 0.0006718 | 1         |
| Zfp746_j6         | 0.607923   | 0.301195  | 0             | 1         | 1         |
| Zfp467            | 2.24911    | 1.7849    | -0.333512     | 0.230494  | 0.577519  |
| Zfp467            | 0.34205    | 0         | -1.79769e+308 | 7.38E-09  | 5.27E-07  |
| Gimap3_j1         | 0.193134   | 0         | -1.79769e+308 | 1.48E-05  | 0.0004315 |
| Tmem176b_j2       | 16.0826    | 18.6264   | 0             | 1         | 1         |
| Tra2a_j5          | 0.459199   | 0.244703  | 0             | 1         | 1         |
| Osbpl3_j7         | 9.91617    | 10.0933   | 0             | 1         | 1         |
| XLOC_028161       | 0.287102   | 0.151304  | -0.924117     | 0.18016   | 0.519807  |
| XLOC_028163       | 0.119578   | 0.040332  | -1.56795      | 0.572773  | 1         |
| Hoxa3_j4          | 0.793988   | 0.749385  | 0             | 1         | 1         |

|              |            |                 |             |           |           |
|--------------|------------|-----------------|-------------|-----------|-----------|
| Hoxa9_j3     | 0.221321   | 0.041143        | 0           | 1         | 1         |
| Hoxa10_j1    | 4.73006    | 4.14329         | 0           | 1         | 1         |
| AK020588_j1  | 0.0377428  | 0.0586797       | 0           | 1         | 1         |
| AK020588     | 0.527489   | 0.248063        | 0           | 1         | 1         |
| Scrn1_j2     | 3.15493    | 1.89533         | 0           | 1         | 1         |
| Scrn1        | 0.916863   | 0.648323        | 0           | 1         | 1         |
| Scrn1_j4     | 9.33474    | 8.36464         | 0           | 1         | 1         |
| Nod1_j2      | 1.18508    | 1.38358         | 0.22342     | 0.483904  | 0.776148  |
| Crhr2_j3     | 0.105136   | 0 -1.79769e+308 |             | 0.003923  | 1         |
| Pde1c_j4     | 0.287405   | 0.200564        | 0           | 1         | 1         |
| Pde1c_j6     | 0.581578   | 0.643503        | 0           | 1         | 1         |
| Lsm5_j1      | 1.05097    | 1.02359         | -0.0380849  | 0.940794  | 0.982026  |
| Nt5c3        | 10.3717    | 8.49419         | 0           | 1         | 1         |
| Nt5c3_j1     | 5.31505    | 6.5984          | 0           | 1         | 1         |
| Vopp1_j3     | 1.37401    | 0.152819        | 0           | 1         | 1         |
| AK043607_j2  | 0.236947   | 0.183201        | -0.371134   | 0.703414  | 0.891491  |
| XLOC_028197  | 0.184906   | 0.129627        | -0.512428   | 0.457919  | 0.760721  |
| Gadd45a_j1   | 2.09685    | 0.812356        | -1.36804    | 0.0287222 | 0.180385  |
| abParts_j1   | 0.895094   | 0 -1.79769e+308 |             | 4.15E-05  | 0.0010167 |
| abParts_j2   | 0.0992794  | 0.0680814       | -0.544234   | 0.576288  | 1         |
| Thnsl2_j3    | 0.140751   | 0 -1.79769e+308 |             | 0.0135583 | 0.107097  |
| Smyd1_j2     | 0.0914067  | 0 -1.79769e+308 |             | 0.0015675 | 1         |
| Rmnd5a_j1    | 0.00132675 | 0.0950961       | 0           | 1         | 1         |
| Ptcd3_j3     | 0.438341   | 0.497299        | 0           | 1         | 1         |
| Ptcd3_j1     | 0.274691   | 0.161016        | 0           | 1         | 1         |
| Usp39_j1     | 0.217519   | 0.95799         | 2.13887     | 0.0008494 | 0.0125509 |
| Mat2a_j1     | 4.0342     | 3.37018         | -0.25946    | 0.116589  | 0.424591  |
| Dnahc6_j2    | 0.130281   | 0.087794        | -0.569437   | 0.475075  | 1         |
| Dnahc6_j12   | 0.0850031  | 0 -1.79769e+308 |             | 0.009068  | 1         |
| Ctnna2_j5    | 0.207751   | 0               | 0           | 1         | 1         |
| Ctnna2_j4    | 0.869562   | 0.902591        | 0           | 1         | 1         |
| Ctnna2_j10   | 8.53525    | 2.44576         | 0           | 1         | 1         |
| Ctnna2_j12   | 0.422444   | 0.0822525       | 0           | 1         | 1         |
| Pole4_j1     | 4.33777    | 6.13805         | 0           | 1         | 1         |
| Wbp1         | 4.39903    | 4.22951         | 0           | 1         | 1         |
| Wbp1_j1      | 0.101081   | 0.129351        | 0           | 1         | 1         |
| AK038985_j2  | 0.367703   | 0.0796579       | 0           | 1         | 1         |
| Tet3_j2      | 0.049717   | 0.0406623       | 0           | 1         | 1         |
| Dguok_j1     | 1.94895    | 2.29707         | 0.237098    | 0.476364  | 0.77206   |
| Actg2        | 0.14094    | 0.0956427       | -0.559357   | 0.574377  | 0.828005  |
| Tex261_j1    | 20.5709    | 21.715          | 0           | 1         | 1         |
| Cyp26b1_j4   | 0.29165    | 0.0950778       | -1.61706    | 0.120377  | 0.432041  |
| Exoc6b_j3    | 0.813567   | 0.65881         | 0           | 1         | 1         |
| Spr_j1       | 24.8709    | 24.7828         | -0.00512046 | 0.972394  | 0.991962  |
| Rab11fip5_j4 | 0.116302   | 0.0825877       | 0           | 1         | 1         |
| Rab11fip5_j3 | 7.78907    | 10.1056         | 0           | 1         | 1         |
| Fbxo41       | 1.4043     | 0.769149        | 0           | 1         | 1         |

|                  |           |             |           |           |           |
|------------------|-----------|-------------|-----------|-----------|-----------|
| Dusp11_j5        | 0.355092  | 0.241835    | 0         | 1         | 1         |
| Gmcl1_j1         | 0.719151  | 0.355686    | 0         | 1         | 1         |
| Gmcl1_j2         | 0.462234  | 0.457697    | 0         | 1         | 1         |
| Anxa4_j1         | 0.223977  | 0           | 0         | 1         | 1         |
| Prokr1           | 0.491667  | 0.608839    | 0         | 1         | 1         |
| Apf_j4           | 1.00505   | 0.784065    | -0.358224 | 0.335447  | 0.6762    |
| AK131825_j2      | 0.141851  | 0.0376777   | -1.9126   | 0.209074  | 0.553253  |
| AK131825_j6      | 0.0774266 | 0.0478495   | -0.694324 | 0.730371  | 1         |
| AK131825_j7      | 0.102329  | 0.0757311   | -0.434257 | 0.792297  | 1         |
| XLOC_028267      | 0.137575  | 0.165327    | 0.265111  | 0.768333  | 0.921081  |
| Isy1_j2          | 0.524013  | 2.19016     | 0         | 1         | 1         |
| Rab7_j1          | 58.8952   | 55.5953     | 0         | 1         | 1         |
| Abtb1_j1         | 1.65793   | 1.41301     | 0         | 1         | 1         |
| Ccdc37_j6        | 0.42131   | 0.148482    | -1.50459  | 0.0005587 | 0.0089443 |
| Iqsec1_j3        | 0.627001  | 0.138243    | 0         | 1         | 1         |
| Iqsec1_j4        | 0.123503  | 0.0421987   | 0         | 1         | 1         |
| Nup210_j1        | 0.854474  | 0.753804    | -0.180847 | 0.526746  | 0.801217  |
| Xpc_j3           | 0.665372  | 0.471895    | 0         | 1         | 1         |
| Grip2_j3         | 0.621783  | 0.275233    | 0         | 1         | 1         |
| Zfyve20_j1       | 0.377249  | 0           | 0         | 1         | 1         |
| Zfyve20_j2       | 0.108903  | 0           | 0         | 1         | 1         |
| Prickle2_j4      | 4.20822   | 2.40978     | 0         | 1         | 1         |
| Fam19a4_j1       | 1.98344   | 1.07101     | 0         | 1         | 1         |
| Uba3_j1          | 5.28917   | 4.26256     | 0         | 1         | 1         |
| Uba3_j2          | 3.78495   | 2.78076     | 0         | 1         | 1         |
| Frmd4b           | 1.21721   | 0.846238    | -0.524443 | 0.0439914 | 0.238874  |
| Frmd4b_j2        | 1.15362   | 1.19348     | 0.0489978 | 0.827508  | 0.944502  |
| XLOC_028306      | 0.121468  | 0.038454    | -1.65937  | 0.351376  | 1         |
| Cntn3_j2         | 0.256933  | 0.000133347 | -10.912   | 0.742074  | 0.909745  |
| Cntn3_j3         | 0.137362  | 0.0699409   | -0.973772 | 0.174544  | 0.512648  |
| Crbn_j2          | 1.40892   | 0.806668    | 0         | 1         | 1         |
| Crbn             | 10.751    | 10.1295     | 0         | 1         | 1         |
| XLOC_028313      | 0.276306  | 0.00497706  | -5.79483  | 0.394228  | 0.719811  |
| Srgap3_j5        | 0.518221  | 1.11213     | 1.10169   | 1.20E-06  | 4.82E-05  |
| Lhfp14_j5        | 12.3738   | 16.3203     | 0         | 1         | 1         |
| Tada3_j1         | 9.94764   | 11.7186     | 0         | 1         | 1         |
| Prmt3            | 0.187727  | 0.180401    | -0.057426 | 0.870363  | 0.958722  |
| Sec13_j1         | 0.668736  | 0.599466    | 0         | 1         | 1         |
| Sec13_j2         | 0.0725395 | 0           | 0         | 1         | 1         |
| Sec13_j3         | 0.361247  | 0           | 0         | 1         | 1         |
| Atp2b2_j6        | 1.87052   | 0.454692    | 0         | 1         | 1         |
| Atp2b2_j7        | 1.2508    | 0.792055    | 0         | 1         | 1         |
| Atp2b2_j8        | 2.30085   | 1.32672     | 0         | 1         | 1         |
| 2510049J12Rik_j1 | 0.113964  | 0.0549403   | -1.05264  | 0.420297  | 1         |
| Raf1_j5          | 1.67705   | 0.228687    | 0         | 1         | 1         |
| Raf1_j4          | 14.8316   | 16.1639     | 0         | 1         | 1         |
| Tmem40           | 0.405335  | 0.144586    | -1.48719  | 0.108579  | 0.409735  |

|               |           |                 |            |           |           |
|---------------|-----------|-----------------|------------|-----------|-----------|
| BC060267_j7   | 0.161424  | 0.234997        | 0.54179    | 0.298862  | 0.645621  |
| Mbd4_j4       | 0.412063  | 0.445846        | 0.113679   | 0.753986  | 0.915071  |
| Plxnd1_j4     | 4.78599   | 3.53506         | 0          | 1         | 1         |
| Tmcc1_j4      | 0.315838  | 0               | 0          | 1         | 1         |
| Zfp422        | 2.50138   | 1.23758         | -1.0152    | 0.000327  | 0.0057388 |
| Fxyd4_j2      | 0.0526796 | 0.0519859       | -0.0191232 | 0.984652  | 1         |
| Csgalnact2_j2 | 1.02397   | 0.977975        | 0          | 1         | 1         |
| Ret_j1        | 1.41288   | 0.511456        | 0          | 1         | 1         |
| Ret_j11       | 2.02452   | 0               | 0          | 1         | 1         |
| Bms1_j3       | 2.28641   | 1.69621         | 0          | 1         | 1         |
| Cacna1c_j3    | 0.393808  | 0.190873        | 0          | 1         | 1         |
| Wnk1_j13      | 2.85308   | 5.34382         | 0          | 1         | 1         |
| Wnk1_j14      | 1.36109   | 1.18844         | 0          | 1         | 1         |
| B4galnt3_j1   | 0.128246  | 0 -1.79769e+308 |            | 9.27E-07  | 1         |
| B4galnt3_j5   | 0.249877  | 0.0653458       | -1.93505   | 0.134194  | 0.455926  |
| Cecr5_j4      | 4.23294   | 5.03626         | 0          | 1         | 1         |
| Phc1          | 0.564712  | 0.49468         | 0          | 1         | 1         |
| Rimklb_j4     | 0.679472  | 0.585339        | -0.215141  | 0.60741   | 0.845325  |
| Rimklb        | 0.46035   | 0.193682        | -1.24904   | 0.149163  | 0.478258  |
| Rimklb_j5     | 0.356083  | 0 -1.79769e+308 |            | 4.94E-13  | 7.43E-11  |
| Rimklb_j6     | 0.286694  | 0.544779        | 0.926161   | 0.0049349 | 0.0502029 |
| Apobec1_j1    | 0.457758  | 0.639048        | 0.481339   | 0.349782  | 0.687467  |
| Slc2a3_j1     | 2.33676   | 0.597269        | 0          | 1         | 1         |
| C1s_j8        | 0.0943569 | 0.23464         | 1.31425    | 0.19349   | 0.535786  |
| C1s_j9        | 0.570608  | 0.497852        | -0.196785  | 0.583598  | 0.833132  |
| Ptpn6_j2      | 0.231913  | 0.392532        | 0.759227   | 0.263424  | 0.612269  |
| Eno2_j3       | 14.2888   | 9.152           | 0          | 1         | 1         |
| Lrrc23_j3     | 0.0637713 | 0.047902        | 0          | 1         | 1         |
| Usp5_j7       | 44.3223   | 46.8223         | 0          | 1         | 1         |
| Leprel2_j10   | 0.0904719 | 0.114238        | 0.336496   | 0.75685   | 1         |
| Leprel2_j11   | 0.0857915 | 0 -1.79769e+308 |            | 0.0053171 | 1         |
| Cd4_j2        | 0.0921139 | 0.0639175       | -0.527208  | 0.613594  | 1         |
| Lag3_j9       | 0.269508  | 0.181336        | -0.571662  | 0.517697  | 0.795965  |
| Lag3_j10      | 0.122182  | 0.063308        | -0.948574  | 0.400692  | 1         |
| Ptms_j5       | 0.255953  | 0               | 0          | 1         | 1         |
| Plekhg6_j1    | 0.0373103 | 0.0484654       | 0.377381   | 0.84411   | 1         |
| Cd9_j2        | 109.665   | 76.5069         | 0          | 1         | 1         |
| XLOC_028410   | 0.790415  | 0.741543        | -0.0920806 | 0.610812  | 0.846628  |
| Prmt8_j1      | 5.47363   | 4.17177         | -0.391836  | 0.113354  | 0.419063  |
| XLOC_028421   | 2.41214   | 1.25512         | 0          | 1         | 1         |
| Tspan9_j2     | 0.175616  | 0 -1.79769e+308 |            | 1.96E-05  | 0.0005461 |
| Tspan9_j3     | 0.212744  | 0 -1.79769e+308 |            | 2.88E-06  | 0.0001049 |
| AK033854_j2   | 0.315261  | 0.124844        | 0          | 1         | 1         |
| AK033854_j3   | 0.914655  | 0.629599        | 0          | 1         | 1         |
| BC048546_j1   | 48.103    | 43.9393         | 0          | 1         | 1         |
| Klrb1a        | 0.221643  | 0.162257        | -0.449955  | 0.495544  | 0.782921  |
| Klrb1a_j1     | 0.0554502 | 0 -1.79769e+308 |            | 0.0538075 | 1         |

|                   |             |                        |             |           |           |
|-------------------|-------------|------------------------|-------------|-----------|-----------|
| BC035044          | 0.147661    | 0.218613               | 0.566096    | 0.283512  | 0.631899  |
| Clec1a_j1         | 0.162349    | 0 -1.79769e+308        |             | 0.0014614 | 0.0193301 |
| AK016696_j4       | 0.0733965   | 0                      | 0           | 1         | 1         |
| AK016696_j6       | 0.222469    | 0.0962165              | 0           | 1         | 1         |
| Arhgdib_j2        | 0.585297    | 0.44705                | -0.388733   | 0.544817  | 0.811727  |
| Eps8              | 0.23508     | 0.0525205              | 0           | 1         | 1         |
| Slc15a5           | 0.162174    | 0.108661               | -0.577705   | 0.49108   | 0.780237  |
| Lmo3_j3           | 0.0349162   | 0.085544               | 1.29277     | 0.216107  | 1         |
| Lmo3_j4           | 0.0561703   | 0 -1.79769e+308        |             | 0.0110847 | 1         |
| Lmo3              | 0.109784    | 0.0953259              | -0.203721   | 0.759828  | 1         |
| XLOC_028465       | 0.18513     | 0.0817181              | -1.17981    | 0.315936  | 0.659891  |
| Ldhb_j1           | 29.1657     | 20.0523                | 0           | 1         | 1         |
| Kcnj8_j1          | 0.12664     | 0 -1.79769e+308        |             | 0.0043179 | 1         |
| Abcc9_j4          | 0.0899812   | 0 -1.79769e+308        |             | 0.0169489 | 1         |
| Abcc9_j5          | 0.142488    | 0.0175345              | -3.02257    | 0.196396  | 0.539163  |
| St8sia1_j3        | 1.34825     | 0.657978               | 0           | 1         | 1         |
| 5730419I09Rik_j15 | 0.651844    | 0                      | 0           | 1         | 1         |
| 5730419I09Rik_j14 | 0.676726    | 0                      | 0           | 1         | 1         |
| 5730419I09Rik     | 0.611123    | 0.894532               | 0           | 1         | 1         |
| Sox5_j4           | 0.236096    | 0.153094               | -0.624957   | 0.321467  | 0.664578  |
| Casc1_j3          | 0.0373012   | 0.0767722              | 1.04136     | 0.395942  | 1         |
| Bhlhe41_j1        | 0.208214    | 0.0823203              | -1.33875    | 0.0374207 | 0.214459  |
| Tm7sf3_j2         | 4.8387      | 5.59563                | 0           | 1         | 1         |
| Caprin2_j9        | 0.187832    | 0.0706516              | 0           | 1         | 1         |
| Caprin2_j10       | 0.276871    | 0.0716745              | 0           | 1         | 1         |
| Amn1              | 1.20346     | 1.07429                | -0.163803   | 0.710126  | 0.894382  |
| Amn1_j2           | 0.899581    | 0.999177               | 0.151486    | 0.770457  | 0.921881  |
| Ccdc132_j1        | 0.741471    | 0.825687               | 0.155204    | 0.656509  | 0.86899   |
| Col1a2_j2         | 0.199874    | 0.373581               | 0           | 1         | 1         |
| Casd1_j2          | 2.00646     | 1.92204                | 0           | 1         | 1         |
| Peg10_j5          | 0.0266699   | 0.115471               | 2.11425     | 0.0125409 | 1         |
| Peg10_j6          | 0           | 0.0947765 1.79769e+308 |             | 0.0022293 | 1         |
| Neurabin_j2       | 0.0437378   | 0.0870145              | 0           | 1         | 1         |
| Neurabin_j1       | 0.29396     | 0.377758               | 0           | 1         | 1         |
| Neurabin_j8       | 0.0568923   | 0.0109046              | 0           | 1         | 1         |
| Tac1              | 0.396577    | 0.523862               | 0.401585    | 0.478557  | 0.773222  |
| Tac1_j3           | 7.8792      | 13.185                 | 0.742775    | 0.0020662 | 0.0256393 |
| Tac1_j6           | 0.856918    | 0.990142               | 0.208479    | 0.791344  | 0.930476  |
| Glcci1_j8         | 0.555959    | 0.520791               | 0           | 1         | 1         |
| Nxph1_j1          | 0           | 0.154248 1.79769e+308  |             | 0.0092076 | 1         |
| Nxph1_j2          | 0           | 0.0699532 1.79769e+308 |             | 0.063652  | 1         |
| AK003812_j3       | 0.000161847 | 0.220595               | 10.4126     | 0.780905  | 0.925925  |
| Mdfic_j3          | 0           | 0.459067               | 0           | 1         | 1         |
| Cav1_j2           | 0           | 0.0736081              | 0           | 1         | 1         |
| Met_j2            | 0.151461    | 0.150764               | -0.00665138 | 0.990476  | 0.997044  |
| St7_j3            | 0.621234    | 0.219847               | -1.49864    | 0.0132386 | 0.105357  |
| St7_j6            | 0.0820417   | 0.687342               | 3.0666      | 0.0064168 | 0.0616373 |



|                          |            |             |               |           |           |
|--------------------------|------------|-------------|---------------|-----------|-----------|
| A430107013Rik_j1         | 0.0473888  | 0.123817    | 1.38559       | 0.120486  | 1         |
| A430107013Rik_j5         | 0          | 0.313312    | 1.79769e+308  | 0.000124  | 0.0025686 |
| A430107013Rik_j7         | 0.312934   | 0.717409    | 1.19694       | 0.0077836 | 0.0711738 |
| Ptprz1_j3                | 0.671326   | 0.549303    | 0             | 1         | 1         |
| XLOC_027591              | 0.135858   | 0.157294    | 0.211364      | 0.832015  | 0.945814  |
| Snd1_j6                  | 2.51265    | 4.08435     | 0             | 1         | 1         |
| Finc_j2                  | 0.0801719  | 0.0852585   | 0.0887466     | 0.887583  | 1         |
| Ahcyl2_j6                | 0.277132   | 0.0863187   | 0             | 1         | 1         |
| Fam40b_j2                | 0.0283532  | 0.0555319   | 0.969804      | 0.357847  | 1         |
| Nrf1_j1                  | 0.650149   | 0.572763    | -0.182831     | 0.678456  | 0.879072  |
| Klhdc10_j2               | 7.63891    | 7.96965     | 0             | 1         | 1         |
| Cpa2_j1                  | 0.0557212  | 0.116766    | 1.06733       | 0.45815   | 1         |
| AK080631_j5              | 0          | 0.0682842   | 1.79769e+308  | 0.104899  | 1         |
| Lrguk_j6                 | 3.52E-05   | 0.296802    | 13.0414       | 0.79274   | 0.931005  |
| Agbl3_j1                 | 0.35016    | 0.0842584   | -2.05512      | 0.0041913 | 0.0443703 |
| Agbl3                    | 0.118927   | 0.156289    | 0.394147      | 0.540439  | 1         |
| 1810058I24Rik_j1         | 0.652129   | 0.217604    | 0             | 1         | 1         |
| Trim24_j5                | 1.21219    | 1.88986     | 0.640659      | 0.162877  | 0.498174  |
| Luc7I2                   | 5.02037    | 5.99237     | 0             | 1         | 1         |
| Luc7I2_j5                | 0.131805   | 0.000468824 | 0             | 1         | 1         |
| Luc7I2_j4                | 0.634776   | 1.38532     | 0             | 1         | 1         |
| Luc7I2_j9                | 11.1382    | 10.0892     | 0             | 1         | 1         |
| Tbxas1_j2                | 0          | 0.0588472   | 1.79769e+308  | 0.101089  | 1         |
| Adck2                    | 4.67659    | 4.56287     | 0             | 1         | 1         |
| TCRBVbeta5.1/Jbeta1.5_j1 | 0.0274368  | 0.0985041   | 1.84407       | 0.179211  | 1         |
| H4_j1                    | 0.03307    | 0.265491    | 3.00507       | 0.143423  | 0.470568  |
| TCR-beta chain           | 0.188506   | 0.795575    | 2.07739       | 0.0045815 | 0.0475434 |
| Ephb6_j3                 | 0.0678553  | 0           | -1.79769e+308 | 0.074487  | 1         |
| Casp2                    | 0.00342541 | 0.320776    | 0             | 1         | 1         |
| Zyx                      | 10.9434    | 12.7692     | 0             | 1         | 1         |
| Arhgef5_j6               | 0.170313   | 0.0906345   | -0.910053     | 0.46801   | 0.766788  |
| Cntnap2_j3               | 2.66176    | 2.67359     | 0.00639969    | 0.980141  | 0.994006  |
| Cntnap2_j5               | 13.5263    | 10.6456     | 0             | 1         | 1         |
| Cul1_j1                  | 0.0295587  | 0.0765775   | 1.37334       | 0.268365  | 1         |
| Cul1_j3                  | 0.027374   | 0.132458    | 2.27466       | 0.0598722 | 1         |
| Zfp212_j1                | 2.00612    | 2.27716     | 0.182824      | 0.381997  | 0.712175  |
| mKIAA4190_j3             | 0.00551063 | 0.22854     | 5.37408       | 0.0107864 | 0.0905132 |
| Krba1                    | 0.0719744  | 0           | -1.79769e+308 | 0.0034118 | 1         |
| Sspo_j6                  | 0.121677   | 0.202344    | 0.733761      | 0.262188  | 0.611315  |
| Sspo_j7                  | 0.139585   | 0.0200153   | -2.80197      | 0.0224224 | 0.152665  |
| Sspo_j11                 | 0.164016   | 0.158051    | -0.0534455    | 0.927498  | 0.977629  |
| Sspo_j18                 | 0.0312787  | 0.0483743   | 0.629058      | 0.707367  | 1         |
| Sspo_j22                 | 0.194314   | 0.22803     | 0.230834      | 0.753351  | 0.914709  |
| AI854703_j5              | 0.412557   | 0.121595    | -1.76251      | 0.0079379 | 0.0721656 |
| Gimap8                   | 0          | 0.0682175   | 1.79769e+308  | 0.0441353 | 1         |
| Gimap5_j4                | 0.138614   | 0.18896     | 0.447001      | 0.363455  | 0.697495  |
| Tmem176a                 | 13.8175    | 15.9691     | 0             | 1         | 1         |

|                  |           |           |              |           |           |
|------------------|-----------|-----------|--------------|-----------|-----------|
| Tmem176a_j3      | 13.6709   | 14.9726   | 0            | 1         | 1         |
| 2410003K15Rik_j1 | 0.238745  | 0.202674  | -0.23631     | 0.732189  | 0.905282  |
| 2410003K15Rik_j2 | 0.143164  | 0.184283  | 0.364258     | 0.37338   | 0.706267  |
| Npy_j2           | 8.47618   | 108.649   | 0            | 1         | 1         |
| XLOC_027689      | 0         | 0.0687002 | 1.79769e+308 | 0.0990504 | 1         |
| Snx10_j1         | 0         | 0.07094   | 0            | 1         | 1         |
| Snx10            | 4.40384   | 7.50515   | 0            | 1         | 1         |
| Creb5_j1         | 0.0569999 | 0.353789  | 0            | 1         | 1         |
| Chn2_j1          | 5.22      | 4.2591    | 0            | 1         | 1         |
| Gars_j1          | 0.495354  | 0.496661  | 0.00380105   | 0.993945  | 0.99828   |
| Fam188b_j2       | 0.693674  | 0.826978  | 0.25359      | 0.446907  | 0.753618  |
| Adcyap1r1_j2     | 0.492894  | 0.242078  | -1.02581     | 0.0066956 | 0.0635881 |
| XLOC_027716      | 0.0668672 | 0.0444794 | 0            | 1         | 1         |
| Herc3_j3         | 5.64132   | 3.5324    | 0            | 1         | 1         |
| Herc3            | 14.2544   | 13.7237   | 0            | 1         | 1         |
| Grid2_j2         | 0.107165  | 0.154883  | 0.531347     | 0.343944  | 1         |
| Gm15534          | 17.0524   | 19.7812   | 0.214158     | 0.169026  | 0.505791  |
| C130060K24Rik_j1 | 0         | 0.0896488 | 1.79769e+308 | 0.0250047 | 1         |
| Prdm5_j2         | 0.0517613 | 0.162652  | 1.65184      | 0.0971067 | 0.385205  |
| Prdm5_j1         | 0         | 0.108736  | 1.79769e+308 | 0.0263453 | 1         |
| Prdm5_j11        | 0.262012  | 0.295756  | 0.174777     | 0.75234   | 0.914444  |
| Eif2ak3_j2       | 0.176819  | 0.151186  | -0.225948    | 0.827291  | 0.944343  |
| Immt_j7          | 0.121027  | 0.0325105 | 0            | 1         | 1         |
| Immt_j5          | 4.15831   | 3.2632    | 0            | 1         | 1         |
| Immt_j6          | 1.16151   | 1.3033    | 0            | 1         | 1         |
| Polr1a_j4        | 1.00302   | 1.33941   | 0            | 1         | 1         |
| Tmem150a         | 1.30245   | 0.560446  | 0            | 1         | 1         |
| Suclg1_j2        | 0         | 0.0555227 | 1.79769e+308 | 0.147645  | 1         |
| Lrrtm1_j7        | 0         | 2.12493   | 0            | 1         | 1         |
| Reg3b            | 0.0615521 | 0.885524  | 3.84665      | 6.60E-05  | 0.0015096 |
| Reg1             | 0.0175225 | 0.429488  | 4.61534      | 0.0092084 | 0.0806249 |
| AW146020         | 0.441883  | 0.521241  | 0.238285     | 0.331497  | 0.673024  |
| Loxl3_j1         | 0.963858  | 0.700032  | -0.461401    | 0.0359356 | 0.209112  |
| Dqx1_j6          | 1.83996   | 0.43398   | -2.08398     | 7.99E-15  | 1.54E-12  |
| Ccdc142_j4       | 1.09051   | 1.32247   | 0.278228     | 0.352669  | 0.689508  |
| Dctn1            | 3.69841   | 16.4622   | 0            | 1         | 1         |
| Dctn1_j6         | 5.64768   | 5.61679   | 0            | 1         | 1         |
| Dctn1_j5         | 2.35489   | 2.74162   | 0            | 1         | 1         |
| XLOC_027769      | 0.0678833 | 0.163413  | 1.2674       | 0.23545   | 0.582664  |
| Zfml_j8          | 0.412477  | 0.905832  | 0            | 1         | 1         |
| Dysf_j4          | 3.66792   | 4.73534   | 0            | 1         | 1         |
| Alms1_j3         | 0.0187862 | 0.0926084 | 2.30147      | 0.0169978 | 1         |
| Alms1_j10        | 0.0422812 | 0.103923  | 1.29743      | 0.571703  | 1         |
| Alms1-ps1_j1     | 0.172267  | 0.524881  | 1.60734      | 0.0775639 | 0.337104  |
| Tgfa_j3          | 0         | 0.253547  | 1.79769e+308 | 0.0001227 | 0.0025498 |
| Tia1_j3          | 0.402765  | 0.177118  | 0            | 1         | 1         |
| Tia1_j2          | 0.0930262 | 0         | 0            | 1         | 1         |

|                  |           |             |               |           |           |
|------------------|-----------|-------------|---------------|-----------|-----------|
| Tia1_j5          | 0.522214  | 0.634345    | 0             | 1         | 1         |
| C87436_j3        | 3.30027   | 2.78395     | 0             | 1         | 1         |
| C87436_j4        | 1.40574   | 1.51811     | 0             | 1         | 1         |
| C87436_j6        | 0.494207  | 0.357001    | 0             | 1         | 1         |
| Aak1_j6          | 5.62284   | 2.72294     | 0             | 1         | 1         |
| Aak1_j7          | 0.150439  | 0.318855    | 0             | 1         | 1         |
| Nfu1_j2          | 6.25156   | 7.0945      | 0             | 1         | 1         |
| Nfu1_j6          | 3.31167   | 3.91961     | 0             | 1         | 1         |
| Ccdc48           | 0.103379  | 0.0964632   | -0.099889     | 0.897464  | 1         |
| Copg_j2          | 0.0654231 | 0.048049    | 0             | 1         | 1         |
| XLOC_027797      | 0.139583  | 0.135203    | -0.0459938    | 0.95788   | 0.987996  |
| Gata2            | 0.130145  | 0.345417    | 1.40822       | 0.0054003 | 0.0537922 |
| Ruvbl1_j9        | 10.9971   | 11.7906     | 0.100518      | 0.714276  | 0.896527  |
| Zxdc             | 1.72385   | 1.86499     | 0.113537      | 0.601174  | 0.841992  |
| XLOC_027806      | 0         | 0.258211    | 1.79769e+308  | 6.06E-05  | 0.0014015 |
| Fbln2_j1         | 0.482746  | 0.701745    | 0             | 1         | 1         |
| Fbln2_j7         | 2.95969   | 5.30539     | 0             | 1         | 1         |
| Slc6a6_j4        | 0         | 0.112234    | 0             | 1         | 1         |
| 9530026P05Rik_j5 | 0         | 0.203493    | 1.79769e+308  | 4.74E-05  | 0.0011415 |
| Kbtbd8_j2        | 0         | 0.159121    | 0             | 1         | 1         |
| Fam19a1_j5       | 0.438612  | 0.309947    | -0.500922     | 0.329644  | 0.671845  |
| Arl6ip5_j4       | 0         | 3.99961     | 1.79769e+308  | 6.50E-11  | 6.87E-09  |
| Mitf_j1          | 0.160357  | 0.246305    | 0.619163      | 0.166017  | 0.502767  |
| XLOC_027827      | 0.039784  | 0.0772947   | 0.958182      | 0.59949   | 1         |
| Cntn6_j1         | 0.10855   | 0.21494     | 0.985575      | 0.366904  | 0.700429  |
| Cntn6_j4         | 0.0551065 | 0.0494717   | -0.155618     | 0.909459  | 1         |
| Cntn4_j1         | 0.347541  | 0.196729    | -0.820974     | 0.047443  | 0.250092  |
| Trnt1_j1         | 12.418    | 11.4017     | 0             | 1         | 1         |
| Edem1_j2         | 0.142612  | 0.954314    | 0             | 1         | 1         |
| Lmcd1_j1         | 0.142289  | 0.153405    | 0.108524      | 0.911582  | 0.972265  |
| Gm16598_j2       | 0.0972929 | 0.110209    | 0.17983       | 0.821844  | 1         |
| Thumpd3_j1       | 3.25486   | 6.64182     | 0             | 1         | 1         |
| Setd5_j1         | 5.78619   | 5.54272     | -0.0620216    | 0.669927  | 0.875139  |
| Setd5_j3         | 0.0731834 | 0           | -1.79769e+308 | 0.0001439 | 1         |
| Setd5_j10        | 6.2408    | 7.67095     | 0.297673      | 0.0272989 | 0.174575  |
| Brpf1_j8         | 1.32215   | 1.83067     | 0.469485      | 0.0498718 | 0.258011  |
| Il17rc_j1        | 1.32969   | 1.21385     | -0.131504     | 0.634851  | 0.858251  |
| Fancd2_j7        | 0.0237806 | 0.0669128   | 1.49249       | 0.406639  | 1         |
| Irak2            | 0.471819  | 0.787037    | 0             | 1         | 1         |
| Slc6a11_j1       | 0.103628  | 0.171007    | 0.722636      | 0.265526  | 0.614392  |
| Slc6a1_j3        | 0.126448  | 0.419217    | 1.72915       | 0.0039341 | 0.0424032 |
| Hrh1_j5          | 0         | 0.731687    | 1.79769e+308  | 2.75E-09  | 2.12E-07  |
| Pparg_j4         | 0.0798075 | 0.000192229 | -8.69756      | 0.896519  | 1         |
| Pparg_j5         | 0.66721   | 0.75356     | 0.175581      | 0.63733   | 0.85954   |
| Pparg_j7         | 0         | 0.0692961   | 1.79769e+308  | 0.10836   | 1         |
| Tsen2_j3         | 4.32184   | 4.97426     | 0.202836      | 0.271934  | 0.620758  |
| D6Wsu116e_j2     | 1.40314   | 1.24895     | -0.167939     | 0.475538  | 0.771428  |

|                  |           |           |              |           |           |
|------------------|-----------|-----------|--------------|-----------|-----------|
| Anubl1           | 0.101302  | 0.234008  | 1.2079       | 0.074614  | 0.329493  |
| Anubl1_j3        | 0.184352  | 0.220327  | 0.257184     | 0.653635  | 0.867521  |
| March8_j1        | 0.479883  | 0.406574  | 0            | 1         | 1         |
| Zfp239_j1        | 0.19248   | 0.356854  | 0.890625     | 0.0769739 | 0.335484  |
| Rasgef1a_j4      | 1.88895   | 2.72655   | 0.529492     | 0.0411276 | 0.228002  |
| Dcp1b_j3         | 0.180247  | 0.272837  | 0.598065     | 0.436956  | 0.747343  |
| Dcp1b_j2         | 1.12438   | 1.19792   | 0.0914064    | 0.769022  | 0.921341  |
| Rad52_j10        | 0.265876  | 0.739392  | 1.47558      | 0.0045253 | 0.0471281 |
| Kdm5a_j4         | 0.339448  | 0.42483   | 0            | 1         | 1         |
| Kdm5a_j7         | 0.0852066 | 0.11144   | 0            | 1         | 1         |
| Slc6a13_j4       | 0         | 0.205268  | 1.79769e+308 | 0.0269128 | 0.172876  |
| Slc6a13_j7       | 0.130933  | 0.239922  | 0.873739     | 0.375383  | 0.707705  |
| Slc6a13_j9       | 0         | 0.074195  | 1.79769e+308 | 0.141236  | 1         |
| A2m_j2           | 1.96784   | 2.49872   | 0.344576     | 0.213166  | 0.55825   |
| XLOC_027904      | 0.0548685 | 0.158948  | 1.5345       | 0.100776  | 0.393107  |
| M6pr_j1          | 3.6916    | 10.3072   | 0            | 1         | 1         |
| Nanogpd_j1       | 0.135927  | 0.125206  | -0.118532    | 0.86387   | 1         |
| Clec4b1          | 0.0585441 | 0.17086   | 1.54522      | 0.252986  | 0.600981  |
| Clec4n_j1        | 0         | 0.15389   | 1.79769e+308 | 0.060249  | 1         |
| Cd163_j3         | 0.0629911 | 0.0684558 | 0.120023     | 0.89406   | 1         |
| Cd163_j2         | 2.47E-05  | 0.223594  | 13.144       | 0.949034  | 0.985323  |
| C1ra_j1          | 0.616464  | 0.5039    | -0.290878    | 0.71162   | 0.895294  |
| Lpcat3_j2        | 0.077197  | 0.234206  | 1.60116      | 0.0802934 | 0.344616  |
| Lpcat3_j1        | 0.483548  | 0.230106  | -1.07136     | 0.0862541 | 0.358839  |
| Acrbp_j4         | 0.936962  | 0.686585  | -0.448552    | 0.164197  | 0.500134  |
| Acrbp_j12        | 0.115983  | 0.165378  | 0.511858     | 0.464852  | 0.764951  |
| Chd4             | 0.997525  | 0.895796  | 0            | 1         | 1         |
| Iffo1_j1         | 1.85925   | 1.07385   | 0            | 1         | 1         |
| Iffo1            | 0.467451  | 0.447665  | 0            | 1         | 1         |
| Iffo1_j6         | 6.18922   | 5.90917   | 0            | 1         | 1         |
| Tnfrsf1a_j1      | 0         | 2.03736   | 1.79769e+308 | 8.25E-11  | 8.61E-09  |
| Tnfrsf1a_j2      | 0.437219  | 0.595148  | 0.444891     | 0.475882  | 0.771711  |
| XLOC_027942      | 0         | 0.0737313 | 1.79769e+308 | 0.0797573 | 1         |
| XLOC_027942      | 0         | 0.0902553 | 1.79769e+308 | 0.0351589 | 1         |
| D6Wsu163e_j1     | 0.243289  | 0.469488  | 0.948416     | 0.114977  | 0.421857  |
| Foxm1_j4         | 0.226446  | 0.21427   | -0.0797334   | 0.850539  | 0.952491  |
| Foxm1_j5         | 0.203333  | 0.297075  | 0.546983     | 0.262794  | 0.611657  |
| Clec12a_j1       | 0.131997  | 0.578311  | 2.13134      | 0.0386639 | 0.219025  |
| Clec9a_j1        | 0.0491712 | 0.180383  | 1.87518      | 0.200429  | 0.543772  |
| Gabarapl1_j1     | 0.047574  | 0.112905  | 1.24687      | 0.240283  | 1         |
| Gabarapl1_j2     | 0         | 0.569844  | 1.79769e+308 | 0.0134873 | 0.106675  |
| Etv6_j2          | 1.17896   | 1.81818   | 0            | 1         | 1         |
| 8430419L09Rik_j3 | 0         | 0.233024  | 0            | 1         | 1         |
| Atf7ip_j2        | 0         | 0.514476  | 0            | 1         | 1         |
| Strap_j4         | 0.445377  | 0.543282  | 0.286674     | 0.348651  | 0.686735  |
| Plekha5_j1       | 1.60134   | 2.07092   | 0.370998     | 0.0601643 | 0.288813  |
| Plekha5_j3       | 2.2523    | 2.04975   | -0.135954    | 0.516059  | 0.794692  |

|                  |             |           |              |           |           |
|------------------|-------------|-----------|--------------|-----------|-----------|
| Plekha5_j6       | 1.29182     | 0.556839  | -1.21408     | 1.36E-05  | 0.0004036 |
| XLOC_027991      | 0.18534     | 0.253249  | 0.450379     | 0.214289  | 0.559699  |
| Pde3a_j1         | 0.138005    | 0.137945  | -0.000625549 | 0.999245  | 0.999635  |
| AK043509_j4      | 0.0755625   | 0.156782  | 1.05302      | 0.200482  | 1         |
| AK143902_j1      | 0           | 0.0918275 | 1.79769e+308 | 0.0422277 | 1         |
| AK143902_j2      | 3.17826     | 2.85424   | 0            | 1         | 1         |
| Rassf8_j3        | 0           | 0.132575  | 0            | 1         | 1         |
| Rassf8_j4        | 0           | 0.314076  | 0            | 1         | 1         |
| Stk38l_j9        | 1.80647     | 3.35065   | 0            | 1         | 1         |
| Ppfibp1_j2       | 0.024068    | 0.116347  | 0            | 1         | 1         |
| Ccdc91_j1        | 0.461871    | 0.387325  | 0            | 1         | 1         |
| Bicd1            | 0.104768    | 0.0516988 | 0            | 1         | 1         |
| AK035387_j1      | 0.667884    | 0.796212  | 0.253555     | 0.396164  | 0.721006  |
| Sgce             | 2.02087     | 3.24038   | 0            | 1         | 1         |
| Asns_j1          | 6.46609     | 8.3996    | 0            | 1         | 1         |
| Asns_j8          | 20.511      | 43.3282   | 0            | 1         | 1         |
| XLOC_028041      | 1.41964     | 1.50681   | 0.0859766    | 0.721389  | 0.900355  |
| Col28a1_j9       | 2.75908     | 3.981     | 0            | 1         | 1         |
| Gpr85_j7         | 0.958346    | 1.60534   | 0            | 1         | 1         |
| Gm15473_j1       | 0.113413    | 0.184084  | 0.698777     | 0.469423  | 0.767555  |
| Cttnbp2_j2       | 0.225211    | 0.441316  | 0            | 1         | 1         |
| Cttnbp2_j3       | 0.228346    | 0.421694  | 0            | 1         | 1         |
| Tspan12_j5       | 1.71609     | 0.959442  | -0.838861    | 0.0097479 | 0.0840417 |
| Cadps2           | 0.347887    | 0.411847  | 0            | 1         | 1         |
| Grm8_j8          | 0           | 0.0611023 | 1.79769e+308 | 0.0444224 | 1         |
| Zfp800_j5        | 0.0869873   | 0.331738  | 1.93117      | 0.0073441 | 0.06827   |
| Prrt4_j3         | 0           | 0.0688528 | 1.79769e+308 | 0.077517  | 1         |
| Impdh1           | 74.1354     | 74.3085   | 0            | 1         | 1         |
| Opn1sw_j1        | 0.117186    | 0.159258  | 0.442573     | 0.619527  | 0.850756  |
| Kcp_j2           | 0.063882    | 0.0837799 | 0.391195     | 0.709624  | 1         |
| Kcp_j1           | 0.0668051   | 0.166766  | 1.3198       | 0.168536  | 0.505174  |
| BC145649_j1      | 0.0184745   | 0.120931  | 2.71057      | 0.117234  | 1         |
| XLOC_028093      | 0.0868164   | 0.118694  | 0.451205     | 0.714787  | 1         |
| XLOC_028093      | 0.101613    | 0.176901  | 0.799855     | 0.332984  | 0.674032  |
| BC145649_j4      | 0.079163    | 0.113431  | 0.518919     | 0.587995  | 1         |
| Plxna4_j2        | 0.0142547   | 1.3352    | 0            | 1         | 1         |
| Chchd3_j4        | 0           | 2.98397   | 1.79769e+308 | 4.28E-10  | 3.80E-08  |
| Slc35b4_j4       | 2.67774     | 3.81565   | 0            | 1         | 1         |
| 2010107G12Rik_j1 | 0.0855203   | 0.126953  | 0.569953     | 0.518372  | 1         |
| Slc13a4_j3       | 3.92E-05    | 0.170697  | 12.0871      | 0.956964  | 0.987617  |
| Ptn_j1           | 60.4653     | 48.9547   | 0            | 1         | 1         |
| Ptn_j5           | 33.2991     | 32.1254   | 0            | 1         | 1         |
| Dgki_j6          | 0           | 0.168282  | 1.79769e+308 | 3.17E-06  | 0.0001143 |
| Creb3l2_j4       | 0.000845787 | 1.36433   | 0            | 1         | 1         |
| D630045J12Rik_j1 | 0.993273    | 0.452954  | 0            | 1         | 1         |
| D630045J12Rik    | 0.232093    | 0.731232  | 0            | 1         | 1         |
| Klrg2_j2         | 0.0931631   | 0.064088  | -0.539705    | 0.422668  | 1         |

|             |             |           |              |           |           |
|-------------|-------------|-----------|--------------|-----------|-----------|
| Klrg2_j1    | 0.085314    | 0.045959  | -0.892436    | 0.245548  | 1         |
| Hipk2       | 0.249732    | 0.303508  | 0            | 1         | 1         |
| Jhdm1d_j2   | 0           | 0.0655179 | 0            | 1         | 1         |
| Mkrn1_j1    | 2.76313     | 5.99046   | 0            | 1         | 1         |
| Dennd2a_j1  | 0.000186153 | 0.242249  | 0            | 1         | 1         |
| Clec5a      | 0.0392942   | 0.164457  | 2.06532      | 0.0622675 | 0.295391  |
| Fam131b_j2  | 41.722      | 43.7966   | 0.0700085    | 0.418978  | 0.735747  |
| Fam115a_j7  | 0.121951    | 0         | 0            | 1         | 1         |
| Fam115a     | 13.6998     | 19.0789   | 0            | 1         | 1         |
| Tpk1_j8     | 0.196297    | 0.343051  | 0.805389     | 0.185171  | 0.525367  |
| Tpk1_j7     | 0.106958    | 0.267755  | 1.32387      | 0.0726522 | 0.324319  |
| Ezh2_j7     | 0.574528    | 0.560946  | -0.0345142   | 0.959075  | 0.988313  |
| Ezh2_j8     | 2.52E-05    | 0.177073  | 12.7803      | 0.967537  | 0.990839  |
| Zfp467      | 1.60384     | 1.56196   | -0.0381759   | 0.863361  | 0.956634  |
| Rarres2_j2  | 2.57054     | 1.48911   | 0            | 1         | 1         |
| Rarres2_j6  | 7.14702     | 8.46206   | 0            | 1         | 1         |
| Gimap3_j2   | 0           | 0.0734171 | 1.79769e+308 | 0.168299  | 1         |
| XLOC_028158 | 0           | 0.116917  | 1.79769e+308 | 0.119752  | 1         |
| Hoxa1       | 0.231916    | 0.230702  | -0.0075678   | 0.988043  | 0.996422  |
| Hoxa9_j1    | 1.32569     | 0.627078  | 0            | 1         | 1         |
| Hoxa10_j2   | 0.509784    | 1.6154    | 0            | 1         | 1         |
| Jazf1_j1    | 1.35385     | 1.25618   | 0            | 1         | 1         |
| Scrn1_j5    | 17.2546     | 15.675    | 0            | 1         | 1         |
| Crhr2_j1    | 0           | 0.206255  | 1.79769e+308 | 0.0061016 | 0.0593465 |
| Pde1c       | 0.407125    | 1.03455   | 0            | 1         | 1         |
| Lsm5_j3     | 0.356845    | 1.87988   | 2.39727      | 0.108957  | 0.410718  |
| Kbtbd2_j2   | 1.33923     | 2.95244   | 0            | 1         | 1         |
| Vopp1_j4    | 4.30592     | 5.3652    | 0            | 1         | 1         |
| Hpgds       | 0.0857061   | 0.320823  | 1.90431      | 0.0005214 | 0.0084328 |
| Gadd45a_j4  | 0           | 0.19062   | 1.79769e+308 | 0.126119  | 0.442293  |
| Smyd1_j4    | 0           | 0.0891764 | 1.79769e+308 | 0.0204245 | 1         |
| Usp39_j3    | 0           | 0.598119  | 1.79769e+308 | 5.34E-05  | 0.0012627 |
| Vamp5       | 4.50492     | 4.22508   | -0.0925219   | 0.738326  | 0.908051  |
| Mat2a_j3    | 2.53753     | 4.52891   | 0.835737     | 1.21E-07  | 6.33E-06  |
| Mat2a_j2    | 5.02298     | 5.06005   | 0.010608     | 0.939177  | 0.981504  |
| Sh2d6_j6    | 0.0295594   | 0.103082  | 1.8021       | 0.22137   | 1         |
| Tcf7l1_j3   | 0.000129812 | 0.158667  | 10.2554      | 0.842859  | 0.950302  |
| Ctnna2_j6   | 0.0372165   | 0.118735  | 0            | 1         | 1         |
| Ctnna2_j15  | 0.380986    | 0.366161  | 0            | 1         | 1         |
| Pole4_j2    | 5.89678     | 7.67902   | 0            | 1         | 1         |
| Hk2_j1      | 0.173861    | 0.238252  | 0.454557     | 0.30478   | 0.65013   |
| Tlx2_j3     | 0.0207974   | 0.127262  | 2.61333      | 0.0003113 | 1         |
| AK161590_j4 | 0           | 0.181394  | 1.79769e+308 | 0.0025071 | 0.0299142 |
| Wdr54       | 3.28422     | 3.53382   | 0            | 1         | 1         |
| Actg2_j1    | 0           | 0.0986247 | 1.79769e+308 | 0.0460337 | 1         |
| Stambp_j2   | 5.48928     | 6.01044   | 0            | 1         | 1         |
| Cyp26b1_j5  | 0           | 0.140044  | 1.79769e+308 | 0.0108328 | 1         |

|               |             |           |              |           |           |
|---------------|-------------|-----------|--------------|-----------|-----------|
| Exoc6b_j4     | 0           | 1.73507   | 0            | 1         | 1         |
| Sfxn5_j2      | 2.27132     | 2.34389   | 0            | 1         | 1         |
| Mxd1_j2       | 0.486297    | 0.628646  | 0            | 1         | 1         |
| Arhgap25_j2   | 0.639619    | 0.296414  | -1.1096      | 0.053753  | 0.270102  |
| Arhgap25      | 0.186594    | 0.304353  | 0.705843     | 0.216437  | 0.562554  |
| Prokr1_j1     | 0           | 0.315065  | 0            | 1         | 1         |
| AK131825_j8   | 0           | 0.0948216 | 1.79769e+308 | 0.148661  | 1         |
| Rab7_j3       | 0.798889    | 0.752582  | 0            | 1         | 1         |
| Rab7_j2       | 2.6058      | 2.96568   | 0            | 1         | 1         |
| Ccdc37_j4     | 0.384448    | 0.647679  | 0.752492     | 0.0047345 | 0.048672  |
| Iqsec1_j9     | 9.83943     | 7.70089   | 0            | 1         | 1         |
| Iqsec1_j6     | 6.72579     | 3.19268   | 0            | 1         | 1         |
| Nup210_j5     | 0.026612    | 0.0489661 | 0.879709     | 0.478497  | 1         |
| Grip2_j4      | 0           | 0.107017  | 0            | 1         | 1         |
| Adamts9_j5    | 0           | 0.0942684 | 1.79769e+308 | 0.0096121 | 1         |
| Magi1_j1      | 3.19504     | 2.75368   | 0            | 1         | 1         |
| Magi1_j8      | 2.95657     | 2.19926   | 0            | 1         | 1         |
| Magi1_j9      | 0           | 0.266896  | 0            | 1         | 1         |
| Fam19a4_j2    | 0.000708711 | 2.59685   | 0            | 1         | 1         |
| Fam19a4_j3    | 0.144547    | 0.506537  | 0            | 1         | 1         |
| Tmf1_j1       | 3.37102     | 3.13768   | 0            | 1         | 1         |
| Frmd4b_j3     | 0           | 0.810612  | 1.79769e+308 | 1.07E-09  | 8.94E-08  |
| Frmd4b_j4     | 0.623835    | 0.678759  | 0.121735     | 0.705554  | 0.892269  |
| Gm765_j4      | 1.07768     | 0.60813   | 0            | 1         | 1         |
| Rybp_j1       | 0.71843     | 0.9906    | 0.463455     | 0.0932136 | 0.3757    |
| Shq1_j2       | 0.0190773   | 0.0962773 | 2.33534      | 0.0652721 | 1         |
| Cntn3_j6      | 0.704225    | 1.1845    | 0.750174     | 0.0005354 | 0.0086356 |
| Crbn_j6       | 0.13061     | 0.161738  | 0            | 1         | 1         |
| Crbn_j7       | 0.412845    | 0.433145  | 0            | 1         | 1         |
| Sumf1_j1      | 0.381633    | 0.407827  | 0            | 1         | 1         |
| Oxtr_j2       | 0.0103359   | 0.0565646 | 2.45224      | 0.228105  | 1         |
| Rad18_j3      | 0.732864    | 0.712221  | -0.0412218   | 0.906841  | 0.97045   |
| Gt(ROSA)26Sor | 2.90857     | 2.25049   | 0            | 1         | 1         |
| Lhfp14_j1     | 13.2017     | 6.40857   | 0            | 1         | 1         |
| Camk1_j1      | 24.1545     | 54.8707   | 0            | 1         | 1         |
| Atp2b2_j2     | 3.19214     | 2.68745   | 0            | 1         | 1         |
| AK038749      | 0.118728    | 0.167151  | 0.493497     | 0.568433  | 0.825535  |
| Raf1_j3       | 19.1051     | 20.664    | 0            | 1         | 1         |
| Rpl32_j1      | 42.9503     | 51.8207   | 0.270861     | 0.0328616 | 0.197425  |
| BC060267_j5   | 0.327218    | 0.0086118 | -5.24779     | 0.0247931 | 0.163307  |
| Mbd4          | 0.119249    | 0.299307  | 1.32765      | 0.0176001 | 0.128774  |
| Plxnd1_j1     | 5.39801     | 4.71215   | 0            | 1         | 1         |
| Plxnd1_j3     | 0           | 0.199257  | 0            | 1         | 1         |
| Alox5_j2      | 0           | 0.0688927 | 1.79769e+308 | 0.072448  | 1         |
| Alox5_j1      | 0.090003    | 0.130521  | 0.536231     | 0.541435  | 1         |
| Tmem72_j1     | 1.57655     | 1.45067   | 0            | 1         | 1         |
| Fxyd4_j3      | 0.0211612   | 0.0753936 | 1.83302      | 0.142481  | 1         |

|                  |           |           |              |           |          |
|------------------|-----------|-----------|--------------|-----------|----------|
| Ret_j9           | 10.3482   | 10.5713   | 0            | 1         | 1        |
| Bms1_j2          | 0.142093  | 0.0683045 | 0            | 1         | 1        |
| Zfp248_j4        | 0         | 0.0757506 | 0            | 1         | 1        |
| Zfp9_j1          | 0         | 0.968279  | 1.79769e+308 | 5.54E-11  | 5.91E-09 |
| Ankrd26_j5       | 0.198894  | 0.163431  | 0            | 1         | 1        |
| Cacna1c_j2       | 0.172788  | 0.309761  | 0            | 1         | 1        |
| Erc1_j1          | 0         | 0.0835736 | 0            | 1         | 1        |
| Erc1_j2          | 0.245929  | 0.396285  | 0            | 1         | 1        |
| Wnk1_j4          | 3.30438   | 2.80694   | 0            | 1         | 1        |
| Wnk1_j5          | 0.456342  | 0.47416   | 0            | 1         | 1        |
| Ccdc77_j3        | 0.146195  | 0.225105  | 0.622704     | 0.336436  | 0.676943 |
| Ccdc77           | 0.888416  | 0.817779  | -0.119525    | 0.679771  | 0.879569 |
| XLOC_028369      | 0         | 0.129697  | 1.79769e+308 | 0.0131382 | 1        |
| Atp6v1e1_j3      | 8.83543   | 8.89354   | 0            | 1         | 1        |
| Mical3_j4        | 0.385378  | 0.440556  | 0.193053     | 0.528084  | 0.80195  |
| Mical3_j2        | 0.590968  | 0.576103  | -0.0367539   | 0.874394  | 0.960101 |
| Iqsec3_j4        | 1.32563   | 1.33392   | 0            | 1         | 1        |
| Phc1_j2          | 0.744861  | 1.19974   | 0            | 1         | 1        |
| Rimklb_j2        | 0.0831027 | 0.139439  | 0.746663     | 0.476083  | 1        |
| Apobec1_j4       | 0.212334  | 0.602959  | 1.50572      | 0.0124001 | 0.100607 |
| Slc2a3_j4        | 7.25528   | 9.9974    | 0            | 1         | 1        |
| Pex5_j2          | 7.85317   | 10.1995   | 0            | 1         | 1        |
| C1s_j2           | 0.461693  | 0.645635  | 0.483783     | 0.146883  | 0.475297 |
| Ptpn6_j1         | 0.110034  | 0.299661  | 1.44538      | 0.049506  | 0.2568   |
| Usp5_j6          | 2.01179   | 3.18336   | 0            | 1         | 1        |
| Leprel2_j9       | 1.81451   | 1.88319   | 0.0536007    | 0.826082  | 0.943936 |
| Leprel2_j12      | 0.193152  | 0.196656  | 0.0259359    | 0.973452  | 0.992363 |
| Lag3_j3          | 0.0719365 | 0.129737  | 0.850796     | 0.545533  | 1        |
| Lag3_j4          | 0.0355869 | 0.136301  | 1.93738      | 0.294446  | 1        |
| Ptms_j6          | 0.281868  | 1.21804   | 0            | 1         | 1        |
| Cops7a_j4        | 4.34501   | 6.20033   | 0            | 1         | 1        |
| Cd9_j1           | 19.5238   | 12.1851   | 0            | 1         | 1        |
| Ndufa9_j3        | 37.454    | 33.6068   | 0            | 1         | 1        |
| Dyrk4_j6         | 0         | 0.0469302 | 1.79769e+308 | 0.101748  | 1        |
| Dyrk4_j5         | 0.0442461 | 0.0640642 | 0.53397      | 0.676873  | 1        |
| Tspan9_j4        | 0.195703  | 1.17233   | 2.58264      | 3.69E-11  | 4.11E-09 |
| AK033854_j4      | 0.695367  | 0.45772   | 0            | 1         | 1        |
| Tulp3_j1         | 2.84046   | 3.20742   | 0.175293     | 0.38597   | 0.714331 |
| 5930416l19Rik_j1 | 0         | 0.085719  | 0            | 1         | 1        |
| Fkbp4_j1         | 109.448   | 97.9129   | 0            | 1         | 1        |
| AK036632_j3      | 0.047432  | 0.175565  | 1.88807      | 0.200025  | 0.54322  |
| Clec12b          | 0.0643753 | 0.159092  | 1.30529      | 0.18263   | 0.523127 |
| Clec7a_j1        | 0.297177  | 0.402716  | 0.438444     | 0.348396  | 0.686685 |
| BC099571         | 0.239085  | 0.329113  | 0.46106      | 0.0708602 | 0.319984 |
| Klra2_j3         | 0.0778464 | 0.169795  | 1.12509      | 0.29814   | 0.644746 |
| AK016696_j3      | 0.059389  | 0.288671  | 0            | 1         | 1        |
| AK016696_j5      | 0.111737  | 0.0988823 | 0            | 1         | 1        |



|                   |           |           |              |           |           |
|-------------------|-----------|-----------|--------------|-----------|-----------|
| Wbp11_j1          | 0.763317  | 0.639994  | 0            | 1         | 1         |
| Eps8_j3           | 0         | 0.758518  | 0            | 1         | 1         |
| Eps8_j4           | 0         | 0.234995  | 0            | 1         | 1         |
| Lmo3_j6           | 0.101043  | 0.100898  | -0.00207117  | 0.998898  | 1         |
| Slco1a4_j4        | 0         | 0.316444  | 1.79769e+308 | 0.0025313 | 0.030144  |
| Abcc9_j6          | 0         | 0.148115  | 1.79769e+308 | 0.0280587 | 1         |
| 5730419I09Rik_j8  | 0.536687  | 0.867675  | 0            | 1         | 1         |
| 5730419I09Rik_j9  | 3.12497   | 2.21985   | 0            | 1         | 1         |
| 5730419I09Rik_j12 | 0         | 0.151112  | 0            | 1         | 1         |
| XLOC_028478       | 0.0998377 | 0.467624  | 2.22769      | 0.0511949 | 0.262124  |
| Sox5_j3           | 0         | 0.096237  | 1.79769e+308 | 0.0431878 | 1         |
| Bcat1_j3          | 5.19803   | 14.3747   | 0            | 1         | 1         |
| Itpr2_j1          | 0.192492  | 0.310485  | 0.689724     | 0.0635041 | 0.298841  |
| Itpr2_j4          | 0         | 0.0524274 | 1.79769e+308 | 0.098353  | 1         |
| Gm15767           | 0.071865  | 0.195156  | 1.44127      | 0.282773  | 0.631354  |
| Caprin2_j6        | 1.68782   | 1.44331   | 0            | 1         | 1         |
| Caprin2_j5        | 2.45267   | 4.03651   | 0            | 1         | 1         |
| Caprin2_j7        | 0.627402  | 0.838282  | 0            | 1         | 1         |
| Dennd5b_j1        | 0.0332429 | 0.0738556 | 0            | 1         | 1         |
| Ccdc132_j2        | 7.63903   | 8.03257   | 0.0724717    | 0.659541  | 0.870733  |
| Col1a2_j4         | 11.1452   | 13.8706   | 0            | 1         | 1         |
| Casd1_j3          | 3.15063   | 2.66761   | 0            | 1         | 1         |
| Tac1_j1           | 61.6262   | 67.8493   | 0.138791     | 0.184047  | 0.524679  |
| Tac1_j4           | 0.185031  | 0.655115  | 1.82398      | 0.227683  | 0.574755  |
| Nxph1_j4          | 0.0787237 | 0.205596  | 1.38494      | 0.0776789 | 0.337363  |
| Foxp2_j1          | 1.81E-05  | 0.072031  | 11.9555      | 0.972829  | 1         |
| Mdfic_j2          | 0         | 0.328597  | 0            | 1         | 1         |
| Cav1_j1           | 0         | 0.0799949 | 0            | 1         | 1         |
| Cav1_j5           | 0         | 0.224467  | 0            | 1         | 1         |
| Ptprz1_j4         | 0         | 0.119509  | 0            | 1         | 1         |
| Ahcyl2_j2         | 0.348357  | 0.129307  | 0            | 1         | 1         |
| Fam40b_j1         | 0.0308419 | 0.0496585 | 0.687148     | 0.508106  | 1         |
| Nrf1_j3           | 0.727657  | 0.507169  | -0.520793    | 0.231319  | 0.578405  |
| Nrf1_j4           | 0.109206  | 0.203129  | 0.895341     | 0.279516  | 0.628283  |
| BC021953_j1       | 1.43987   | 1.4058    | 0            | 1         | 1         |
| BC021953          | 0.939143  | 0.785566  | 0            | 1         | 1         |
| BC021953_j2       | 1.43661   | 1.28173   | 0            | 1         | 1         |
| Mkln1_j4          | 10.9708   | 11.5505   | 0            | 1         | 1         |
| Exoc4_j3          | 0         | 0.0512126 | 0            | 1         | 1         |
| Lrguk_j1          | 0         | 0.0775213 | 1.79769e+308 | 0.0002593 | 1         |
| Agbl3_j3          | 0.427194  | 0.801534  | 0.907873     | 0.0654034 | 0.30477   |
| XLOC_027632       | 0         | 0.0513699 | 1.79769e+308 | 0.157701  | 1         |
| Trim24_j3         | 1.34633   | 1.9486    | 0.533402     | 0.0865654 | 0.359624  |
| Ttc26_j2          | 0.148198  | 0.459863  | 1.63368      | 0.0040061 | 0.0429322 |
| Luc7l2_j7         | 1.44629   | 0.758579  | 0            | 1         | 1         |
| Adck2_j1          | 0.356681  | 0.375559  | 0            | 1         | 1         |
| XLOC_027649       | 0.489324  | 0.491665  | 0            | 1         | 1         |

|                  |           |                        |            |           |          |
|------------------|-----------|------------------------|------------|-----------|----------|
| Agk_j3           | 0.523968  | 0.951973               | 0.861442   | 0.140088  | 0.465611 |
| TCR-beta chain   | 0.0316315 | 0.0693474              | 1.13248    | 0.595947  | 1        |
| Ephb6            | 0.396688  | 0.461938               | 0.219693   | 0.562873  | 0.822297 |
| Casp2_j5         | 1.35707   | 1.22735                | 0          | 1         | 1        |
| Zyx_j9           | 4.84831   | 14.4177                | 0          | 1         | 1        |
| Arhgef5_j2       | 0         | 0.0841367 1.79769e+308 |            | 0.0255255 | 1        |
| Arhgef5_j3       | 0.0347009 | 0.0550338              | 0.665343   | 0.566717  | 1        |
| mKIAA4190_j5     | 0.0517505 | 0.111271               | 1.10444    | 0.22094   | 1        |
| Krba1_j3         | 0.102006  | 0 -1.79769e+308        |            | 0.0005897 | 1        |
| Sspo_j12         | 0.0492873 | 0.130453               | 1.40424    | 0.285801  | 1        |
| Sspo_j15         | 0.0771896 | 0.0592771              | -0.380933  | 0.673075  | 1        |
| AI854703_j3      | 0.703258  | 0.593617               | -0.244521  | 0.547249  | 0.813536 |
| AI854703_j2      | 0         | 0.10059 1.79769e+308   |            | 0.0114873 | 1        |
| Gimap8_j1        | 0         | 0.0960412 1.79769e+308 |            | 0.0606745 | 1        |
| Gimap1_j2        | 0.0745319 | 0.153998               | 1.04698    | 0.373296  | 1        |
| 2410003K15Rik_j7 | 0.407269  | 0.394084               | -0.0474784 | 0.883105  | 0.962848 |
| Ccdc126_j1       | 0.885437  | 0.670624               | -0.400886  | 0.29161   | 0.638573 |
| XLOC_027689      | 0.0245267 | 0.0798997              | 1.70384    | 0.286619  | 1        |
| XLOC_027689      | 0.0319983 | 0.164621               | 2.36308    | 0.162882  | 0.498174 |
| AK043004_j12     | 0.256846  | 0.357547               | 0.477228   | 0.449362  | 0.755484 |
| Tax1bp1_j5       | 16.6828   | 22.2201                | 0          | 1         | 1        |
| Wipf3_j2         | 15.4772   | 11.4165                | 0          | 1         | 1        |
| 2410066E13Rik_j1 | 7.78256   | 8.70964                | 0          | 1         | 1        |
| Fam188b_j3       | 0.831488  | 1.26695                | 0.607592   | 0.129994  | 0.449032 |
| Lancl2_j1        | 0.102247  | 0.222507               | 0          | 1         | 1        |
| Fam190a_j4       | 0         | 0.069781 1.79769e+308  |            | 0.0667703 | 1        |
| Grid2_j1         | 0.506283  | 0.533527               | 0.0756194  | 0.893082  | 0.966294 |
| Prdm5_j6         | 0         | 0.115554 1.79769e+308  |            | 0.0243761 | 1        |
| Mad2l1_j5        | 0.729397  | 1.21905                | 0.740981   | 0.0878155 | 0.362795 |
| abParts_j4       | 0.242001  | 0.542862               | 1.16557    | 0.267783  | 0.616423 |
| abParts_j5       | 2.15E-05  | 0.398194               | 14.1783    | 0.994175  | 0.998344 |
| Vps24_j5         | 3.13214   | 3.00936                | 0          | 1         | 1        |
| O610030E20Rik_j2 | 0.689893  | 0.983436               | 0          | 1         | 1        |
| Lrrtm1_j1        | 1.5421    | 1.73552                | 0          | 1         | 1        |
| Lrrtm4_j1        | 0.141921  | 0.10283                | -0.464819  | 0.621198  | 0.85151  |
| Rtkn             | 1.61409   | 3.2441                 | 0          | 1         | 1        |
| Rtkn_j2          | 5.09769   | 5.3469                 | 0          | 1         | 1        |
| Rtkn_j3          | 2.49342   | 2.55747                | 0          | 1         | 1        |
| Dctn1_j10        | 6.42598   | 9.43714                | 0          | 1         | 1        |
| Slc4a5_j1        | 0.0267116 | 0.132495               | 2.3104     | 0.0820117 | 1        |
| Zfml_j7          | 0.537637  | 0.35192                | 0          | 1         | 1        |
| Zfml_j9          | 8.05946   | 7.84502                | 0          | 1         | 1        |
| Dysf_j3          | 1.93236   | 1.83951                | 0          | 1         | 1        |
| Cct7_j2          | 0         | 0.163069 1.79769e+308  |            | 0.0370059 | 0.212975 |
| Cct7_j4          | 14.2159   | 22.8219                | 0.682918   | 0.0002535 | 0.004673 |
| Alms1_j5         | 0.0757373 | 0.0733421              | -0.0463619 | 0.961156  | 1        |
| Alms1_j3         | 0.0312091 | 0.154761               | 2.31001    | 0.173709  | 1        |

|                  |            |           |              |           |           |
|------------------|------------|-----------|--------------|-----------|-----------|
| Tprkb_j2         | 1.04306    | 1.4422    | 0            | 1         | 1         |
| Tprkb_j3         | 0.197963   | 1.53401   | 0            | 1         | 1         |
| Add2_j4          | 18.4945    | 23.1939   | 0            | 1         | 1         |
| Add2_j5          | 25.4235    | 29.1299   | 0            | 1         | 1         |
| Fam136a_j2       | 0.00157502 | 1.22003   | 0            | 1         | 1         |
| Fam136a          | 9.20149    | 9.26293   | 0            | 1         | 1         |
| Tia1_j11         | 0          | 0.68947   | 0            | 1         | 1         |
| AK005503_j2      | 52.2685    | 48.5189   | 0            | 1         | 1         |
| XLOC_027787      | 0.0904484  | 0.0700745 | 0            | 1         | 1         |
| Aak1_j5          | 5.15136    | 5.00328   | 0            | 1         | 1         |
| Gfpt1_j3         | 5.41935    | 6.66306   | 0            | 1         | 1         |
| Copg_j3          | 0.415447   | 0.629375  | 0            | 1         | 1         |
| 8430410A17Rik_j2 | 1.82969    | 3.1986    | 0.805839     | 0.0099567 | 0.0853736 |
| Ruvbl1_j8        | 0.102022   | 0.0765354 | -0.414677    | 0.718986  | 1         |
| MglI             | 5.5347     | 5.397     | 0            | 1         | 1         |
| Tpra1_j4         | 4.0724     | 3.89132   | 0            | 1         | 1         |
| Klf15_j1         | 0.0116326  | 0.100442  | 3.11012      | 0.0337935 | 1         |
| Aldh1l1_j1       | 1.6952     | 4.5843    | 0            | 1         | 1         |
| Fbln2_j3         | 1.07464    | 1.44339   | 0            | 1         | 1         |
| Tmem43_j2        | 5.5923     | 10.0223   | 0            | 1         | 1         |
| Tmem43_j3        | 3.1739     | 6.3367    | 0            | 1         | 1         |
| Fgd5_j1          | 0          | 0.0543221 | 1.79769e+308 | 0.0147805 | 1         |
| Fgd5_j2          | 0.0218762  | 0.253337  | 3.53362      | 0.0020413 | 0.0253875 |
| Fgd5_j5          | 0.549275   | 0.655528  | 0.255129     | 0.568654  | 0.825638  |
| Nr2c2            | 1.79135    | 1.52983   | -0.227671    | 0.0975209 | 0.385892  |
| 9530026P05Rik_j1 | 0.304604   | 0.29018   | -0.0699898   | 0.842372  | 0.950233  |
| 9530026P05Rik_j6 | 0.901963   | 0.318468  | -1.50192     | 3.35E-06  | 0.0001196 |
| Arl6ip5_j2       | 125.034    | 140.499   | 0.168234     | 0.0567058 | 0.278572  |
| Mitf_j2          | 0.150574   | 0.0365585 | -2.0422      | 0.352762  | 0.689566  |
| Ppp4r2_j3        | 0.912695   | 2.15722   | 1.24097      | 6.99E-09  | 5.04E-07  |
| Ppp4r2_j6        | 4.85765    | 3.93934   | -0.302307    | 0.026878  | 0.172743  |
| Chl1_j2          | 0.205134   | 0.304613  | 0            | 1         | 1         |
| Cntn6_j6         | 0.505013   | 0.664058  | 0.394987     | 0.361277  | 0.695919  |
| Cntn4_j2         | 0          | 0.241282  | 1.79769e+308 | 0.0013365 | 0.0180505 |
| Cntn4_j11        | 0.0419195  | 0.0551992 | 0.397026     | 0.76682   | 1         |
| Itpr1_j12        | 1.78004    | 5.46019   | 0            | 1         | 1         |
| Lmcd1_j2         | 0          | 0.0569119 | 1.79769e+308 | 0.134847  | 1         |
| Thumpd3_j2       | 0          | 0.39604   | 0            | 1         | 1         |
| Setd5_j9         | 2.89913    | 2.96701   | 0.0333876    | 0.89651   | 0.967019  |
| Cpne9_j5         | 1.48897    | 1.14467   | -0.379386    | 0.367645  | 0.701064  |
| Brpf1            | 0.240269   | 0.349002  | 0.538584     | 0.180769  | 0.520609  |
| Ogg1             | 0.818509   | 0.967852  | 0            | 1         | 1         |
| Fancd2_j11       | 0.0518326  | 0.0932896 | 0.847856     | 0.535279  | 1         |
| Irak2_j2         | 0.345447   | 0.933506  | 0            | 1         | 1         |
| Syn2_j2          | 39.6862    | 36.2464   | -0.1308      | 0.142479  | 0.469152  |
| Pparg_j3         | 0          | 0.184428  | 1.79769e+308 | 0.0087424 | 0.0775264 |
| Mkrn2_j1         | 0.641107   | 0.751038  | 0            | 1         | 1         |

|                  |            |           |              |           |           |
|------------------|------------|-----------|--------------|-----------|-----------|
| March8_j6        | 0.635806   | 0.396829  | 0            | 1         | 1         |
| March8_j10       | 3.08094    | 4.092     | 0            | 1         | 1         |
| Cxcl12           | 1.24408    | 1.73915   | 0            | 1         | 1         |
| Zfp637_j3        | 0.844569   | 0.617498  | -0.45178     | 0.342715  | 0.682586  |
| Zfp239_j4        | 1.76933    | 1.62473   | -0.123004    | 0.596365  | 0.83935   |
| Hnrnpf_j1        | 0.799747   | 0.61045   | 0            | 1         | 1         |
| Hnrnpf_j3        | 35.6768    | 44.4787   | 0            | 1         | 1         |
| Hnrnpf_j4        | 6.0403     | 4.69391   | 0            | 1         | 1         |
| XLOC_027885      | 0.0515966  | 0.126811  | 1.29733      | 0.195999  | 1         |
| XLOC_027885      | 0.0522021  | 0.102957  | 0.979867     | 0.417266  | 1         |
| Rasgef1a_j6      | 6.25117    | 5.44023   | -0.200457    | 0.238989  | 0.586151  |
| Dcp1b_j1         | 0.0960002  | 0.0914149 | -0.0706079   | 0.909921  | 1         |
| Rad52            | 0.114489   | 0.21783   | 0.927994     | 0.103214  | 0.398287  |
| Rad52_j11        | 0.588424   | 0.961536  | 0.708486     | 0.126218  | 0.442417  |
| Kdm5a_j3         | 0.375479   | 0.145916  | 0            | 1         | 1         |
| Kdm5a_j2         | 0.0598831  | 0.125034  | 0            | 1         | 1         |
| Il17ra_j1        | 0.00219519 | 0.349127  | 0            | 1         | 1         |
| Cecr2_j2         | 0          | 0.156738  | 1.79769e+308 | 5.32E-05  | 1         |
| Slc6a13_j2       | 0.0702338  | 0.0952158 | 0.439036     | 0.726739  | 1         |
| Slc6a13_j8       | 0          | 0.0542354 | 1.79769e+308 | 0.179917  | 1         |
| A2m_j1           | 0          | 0.106796  | 1.79769e+308 | 0.0036922 | 1         |
| XLOC_027904      | 0.0229377  | 0.158821  | 2.79161      | 0.162265  | 0.49761   |
| Foxj2_j2         | 3.54227    | 4.81855   | 0            | 1         | 1         |
| Clec4a3_j1       | 0          | 0.11676   | 1.79769e+308 | 0.0657723 | 1         |
| C530028O21Rik_j2 | 1.52591    | 1.53992   | 0            | 1         | 1         |
| Zfp384_j7        | 0.508986   | 0.240056  | 0            | 1         | 1         |
| Acrbp_j1         | 0.240701   | 0.400918  | 0.736063     | 0.0708938 | 0.320021  |
| Lpar5_j2         | 0.37483    | 0.377227  | 0.00919628   | 0.978539  | 0.993756  |
| Chd4_j1          | 1.2378     | 1.00074   | 0            | 1         | 1         |
| Chd4_j7          | 0.507206   | 0.5146    | 0            | 1         | 1         |
| Chd4_j9          | 0          | 0.0677092 | 0            | 1         | 1         |
| Chd4_j10         | 1.78254    | 1.60562   | 0            | 1         | 1         |
| Vamp1_j1         | 0.165893   | 0.200766  | 0.275263     | 0.678888  | 0.879317  |
| Vwf              | 0.263271   | 0.300992  | 0.193176     | 0.521715  | 0.798357  |
| Vwf_j3           | 1.26912    | 2.21198   | 0.80151      | 0.0193089 | 0.137521  |
| D6Wsu163e_j3     | 0.0489837  | 0.203142  | 2.05212      | 0.073636  | 0.327003  |
| XLOC_027949      | 0.186305   | 0.151085  | 0            | 1         | 1         |
| XLOC_027949      | 0.129943   | 0.153456  | 0            | 1         | 1         |
| Tspan11_j2       | 0.0112337  | 0.224694  | 4.32206      | 0.0725877 | 0.32416   |
| Foxm1_j3         | 0          | 0.136886  | 1.79769e+308 | 0.0012272 | 1         |
| Gm10069_j1       | 0.226509   | 0.174266  | 0            | 1         | 1         |
| Prp2_j1          | 0          | 0.372419  | 1.79769e+308 | 2.24E-05  | 0.0006065 |
| XLOC_027969      | 0.0387539  | 0.0588787 | 0            | 1         | 1         |
| Crebl2_j3        | 9.47268    | 8.14169   | 0            | 1         | 1         |
| 8430419L09Rik_j1 | 2.42724    | 3.02087   | 0            | 1         | 1         |
| 8430419L09Rik_j5 | 5.46154    | 3.7711    | 0            | 1         | 1         |
| Atf7ip_j3        | 0          | 0.16866   | 0            | 1         | 1         |

|                  |             |           |              |           |           |
|------------------|-------------|-----------|--------------|-----------|-----------|
| BC049715_j1      | 0.0500251   | 0.183096  | 0            | 1         | 1         |
| Ptpro_j4         | 1.64434     | 3.5451    | 1.10832      | 4.39E-06  | 0.0001509 |
| Strap_j1         | 15.3703     | 14.7043   | -0.0639097   | 0.488811  | 0.779314  |
| Plekha5_j2       | 2.04627     | 1.65853   | -0.303091    | 0.139043  | 0.463653  |
| Plekha5_j4       | 0           | 0.111558  | 1.79769e+308 | 0.0345336 | 1         |
| Slco1c1_j2       | 0           | 0.226784  | 1.79769e+308 | 0.0006641 | 0.0102994 |
| XLOC_027996      | 0.156128    | 0.197918  | 0.342172     | 0.646362  | 0.863665  |
| AK043509_j3      | 0.0766526   | 0.0697575 | -0.135985    | 0.876707  | 1         |
| Lrmp_j6          | 2.69E-05    | 0.146587  | 12.411       | 0.946019  | 1         |
| Rassf8_j2        | 0.461594    | 0.3134    | 0            | 1         | 1         |
| Sspn_j3          | 0.927526    | 1.62703   | 0            | 1         | 1         |
| Far2             | 2.5437      | 2.10764   | 0            | 1         | 1         |
| 2810474O19Rik_j5 | 0.149963    | 0.171067  | 0.189959     | 0.705226  | 0.892225  |
| Samd9l_j1        | 0.116433    | 0.432332  | 1.89264      | 2.75E-05  | 0.0007185 |
| Pon2_j3          | 0.28477     | 0.708014  | 1.31398      | 0.0261973 | 0.169915  |
| XLOC_028042      | 0.322315    | 0.254031  | -0.343468    | 0.586398  | 0.834392  |
| Col28a1_j5       | 0.162664    | 0.30619   | 0            | 1         | 1         |
| Col28a1_j6       | 0.00273033  | 1.00028   | 0            | 1         | 1         |
| Rpa3_j1          | 0.806513    | 1.02257   | 0.342427     | 0.47103   | 0.76863   |
| Tmem168_j1       | 0.000854881 | 0.458623  | 0            | 1         | 1         |
| Gpr85_j5         | 0.368892    | 0.591203  | 0            | 1         | 1         |
| 2610001J05Rik_j1 | 9.17461     | 10.0366   | 0.129559     | 0.372632  | 0.705661  |
| Cttnbp2          | 1.09897     | 3.02388   | 0            | 1         | 1         |
| Grm8_j3          | 0           | 0.282575  | 1.79769e+308 | 0.0001069 | 0.00228   |
| XLOC_028077      | 0.236663    | 0.238678  | 0.0122322    | 0.990445  | 0.997044  |
| Kcp_j4           | 0.0442565   | 0.0760788 | 0.781605     | 0.62266   | 1         |
| Tnpo3_j1         | 7.06871     | 9.54409   | 0            | 1         | 1         |
| Gm2058_j3        | 0.326712    | 1.70276   | 2.38178      | 7.44E-14  | 1.26E-11  |
| Tmem209_j2       | 6.53206     | 6.34893   | 0            | 1         | 1         |
| Tmem209_j3       | 0.335327    | 0.204426  | 0            | 1         | 1         |
| Tsga14_j2        | 0.287584    | 0.548154  | 0            | 1         | 1         |
| Copg2_j4         | 0.382902    | 0.306209  | 0            | 1         | 1         |
| Copg2_j6         | 0           | 0.210727  | 0            | 1         | 1         |
| XLOC_028090      | 0.0414752   | 0.132934  | 1.68039      | 0.164621  | 1         |
| Chchd3_j3        | 0.292409    | 8.57065   | 4.87334      | 0         | 0         |
| Cnot4_j2         | 0.634773    | 0.967834  | 0            | 1         | 1         |
| Ptn_j4           | 0           | 0.218949  | 0            | 1         | 1         |
| Dgki_j5          | 4.75254     | 3.87697   | -0.293769    | 0.0065393 | 0.0624934 |
| Dgki             | 3.12979     | 2.56376   | -0.287807    | 0.0175982 | 0.128774  |
| Creb3l2_j2       | 0.347035    | 0.547442  | 0            | 1         | 1         |
| Zc3hav1_j1       | 2.25081     | 3.36163   | 0            | 1         | 1         |
| XLOC_028122      | 0.0877197   | 0.110416  | 0.331978     | 0.631962  | 1         |
| Parp12_j4        | 1.39984     | 1.67033   | 0.254876     | 0.259682  | 0.608462  |
| Jhdm1d_j1        | 0.406487    | 0.28418   | 0            | 1         | 1         |
| Slc37a3_j1       | 3.10018     | 5.37771   | 0            | 1         | 1         |
| Mkrn1_j3         | 2.19314     | 2.20223   | 0            | 1         | 1         |
| Fam115c_j4       | 0.0216641   | 0.0643997 | 1.57175      | 0.237041  | 1         |

|                  |           |                        |            |           |           |
|------------------|-----------|------------------------|------------|-----------|-----------|
| Fam115a_j5       | 0         | 0.169336               | 0          | 1         | 1         |
| Tpk1_j3          | 0         | 0.2285 1.79769e+308    | 0.0040198  | 0.0430416 |           |
| Tpk1_j4          | 0.239281  | 0.310392               | 0.375388   | 0.539314  | 0.808383  |
| Tpk1_j6          | 0.267641  | 0.13493                | -0.988091  | 0.208308  | 0.552336  |
| Ezh2_j6          | 0.070777  | 0.151576               | 1.09869    | 0.218824  | 1         |
| Ezh2_j5          | 0.1816    | 0.081711               | -1.15217   | 0.212577  | 0.557606  |
| Zfp786_j2        | 0.450109  | 0.43741                | -0.0412888 | 0.906897  | 0.97045   |
| Zfp777_j1        | 0.154204  | 0.644446               | 0          | 1         | 1         |
| Zfp777_j2        | 1.92963   | 2.07736                | 0          | 1         | 1         |
| Zfp777           | 1.87302   | 3.02729                | 0          | 1         | 1         |
| Zfp746_j2        | 0.465276  | 0.657151               | 0          | 1         | 1         |
| Zfp467_j2        | 0.0858053 | 0.681714               | 2.99003    | 2.56E-07  | 1.24E-05  |
| Rarres2_j5       | 0.805356  | 1.06066                | 0          | 1         | 1         |
| Gimap3           | 8.35E-05  | 0.207427               | 11.2787    | 0.917424  | 0.974286  |
| Igf2bp3_j1       | 0.272694  | 0.227645               | -0.260494  | 0.58212   | 0.832681  |
| XLOC_028158      | 0.212312  | 0.234702               | 0.144647   | 0.86238   | 0.956421  |
| Osbpl3_j4        | 0         | 0.383179               | 0          | 1         | 1         |
| Hnrnpa2b1_j1     | 43.1427   | 43.598                 | 0.0151443  | 0.863718  | 0.956651  |
| Hoxa3_j3         | 0.46407   | 0.401588               | 0          | 1         | 1         |
| Hoxa7_j4         | 1.07393   | 1.54423                | 0          | 1         | 1         |
| Hoxa9_j5         | 0         | 0.101267               | 0          | 1         | 1         |
| Hibadh_j1        | 1.53055   | 7.23299                | 2.24054    | 4.44E-16  | 1.02E-13  |
| Crhr2_j4         | 0         | 0.0776425 1.79769e+308 | 0.0495785  |           | 1         |
| Pde1c_j2         | 0.370452  | 0.745995               | 0          | 1         | 1         |
| Lsm5_j2          | 0.191904  | 0.227308               | 0.244259   | 0.867829  | 0.958158  |
| Ppm1k_j3         | 0         | 0.141202 1.79769e+308  | 0.0046145  |           | 1         |
| Vopp1_j5         | 7.48402   | 10.3249                | 0          | 1         | 1         |
| AK043607_j3      | 0.0775446 | 0.249193               | 1.68417    | 0.0923731 | 0.37398   |
| Gadd45a_j2       | 34.4053   | 98.1324                | 1.5121     | 0         | 0         |
| Smyd1_j3         | 0.134646  | 0.0403422              | -1.73881   | 0.114028  | 1         |
| Kdm3a            | 3.4244    | 3.34921                | -0.0320308 | 0.801776  | 0.934013  |
| Ptcd3_j4         | 0.537395  | 0.349254               | 0          | 1         | 1         |
| okadin type I_j1 | 0.0774399 | 0.117032               | 0.595756   | 0.552049  | 1         |
| Sh2d6_j5         | 0.0922304 | 0.109884               | 0.252663   | 0.783087  | 1         |
| Tcf7l1_j2        | 0.996557  | 1.20702                | 0.276427   | 0.353642  | 0.68999   |
| Dnahc6_j7        | 0.209067  | 0.270031               | 0.369154   | 0.474676  | 0.770791  |
| Dnahc6_j11       | 0.124731  | 0.0257247              | -2.2776    | 0.205086  | 1         |
| Dnahc6_j13       | 0.0427937 | 0.117977               | 1.46303    | 0.205769  | 1         |
| Ctnna2_j7        | 0         | 3.17816                | 0          | 1         | 1         |
| Ctnna2_j8        | 18.1304   | 18.3351                | 0          | 1         | 1         |
| Hk2_j3           | 0.172901  | 0.233565               | 0.433878   | 0.293821  | 0.640638  |
| Sema4f_j3        | 2.61627   | 10.2784                | 0          | 1         | 1         |
| Dok1_j1          | 0.0300078 | 0.907789               | 4.91895    | 0.0002688 | 0.0048881 |
| Tlx2_j1          | 2.91071   | 2.78458                | -0.0639108 | 0.582316  | 0.832693  |
| Mthfd2_j2        | 4.19925   | 9.64567                | 0          | 1         | 1         |
| Cyp26b1_j1       | 0         | 0.0610169 1.79769e+308 | 0.0265981  |           | 1         |
| Exoc6b_j2        | 10.5457   | 12.2283                | 0          | 1         | 1         |

|               |             |           |              |           |           |
|---------------|-------------|-----------|--------------|-----------|-----------|
| Rab11fip5_j2  | 1.91562     | 3.70294   | 0            | 1         | 1         |
| Pcyox1_j2     | 9.63514     | 8.88873   | -0.116328    | 0.375358  | 0.707705  |
| Mxd1_j1       | 1.30984     | 1.1508    | 0            | 1         | 1         |
| Antxr1_j1     | 0           | 0.522733  | 0            | 1         | 1         |
| Arhgap25_j5   | 0           | 0.272418  | 1.79769e+308 | 0.0024324 | 0.0292038 |
| Prokr1_j3     | 0.000216538 | 0.72294   | 0            | 1         | 1         |
| AK131825_j3   | 0.135976    | 0.132127  | -0.0414244   | 0.969628  | 1         |
| Cnbp_j1       | 58.9148     | 80.269    | 0            | 1         | 1         |
| Rab7_j4       | 0.0516206   | 0.104457  | 0            | 1         | 1         |
| Plxna1_j1     | 3.85184     | 5.03367   | 0            | 1         | 1         |
| Ccdc37_j5     | 0.142159    | 0.218758  | 0.621824     | 0.141654  | 0.46823   |
| lqsec1_j7     | 0.604131    | 0.68033   | 0            | 1         | 1         |
| Nup210_j4     | 0.0515309   | 0.188384  | 1.87016      | 0.105165  | 0.402655  |
| Wnt7a_j2      | 0.0439376   | 0.210081  | 2.25741      | 0.0150905 | 0.115384  |
| Grip2_j7      | 0           | 0.0755469 | 0            | 1         | 1         |
| Grip2_j6      | 0.0533323   | 0         | 0            | 1         | 1         |
| Grip2_j5      | 0           | 0.0690223 | 0            | 1         | 1         |
| Zfyve20_j4    | 0.136196    | 0.435724  | 0            | 1         | 1         |
| Prickle2_j2   | 0.318488    | 0.20956   | 0            | 1         | 1         |
| Adamts9_j3    | 0.0380537   | 0.16777   | 2.14038      | 0.0010975 | 0.0153713 |
| Magi1_j5      | 8.95303     | 7.53895   | 0            | 1         | 1         |
| Magi1_j11     | 18.9637     | 18.1936   | 0            | 1         | 1         |
| Uba3_j5       | 2.28613     | 4.9689    | 0            | 1         | 1         |
| Gm765_j3      | 0.244624    | 1.83957   | 0            | 1         | 1         |
| Foxp1_j3      | 0.540768    | 0.440913  | 0            | 1         | 1         |
| Eif4e3_j5     | 0.3968      | 1.03948   | 0            | 1         | 1         |
| XLOC_028313   | 0           | 0.222187  | 1.79769e+308 | 0.0040161 | 0.0430209 |
| Srgap3_j2     | 21.4773     | 22.3655   | 0.0584637    | 0.511686  | 0.79169   |
| Gt(ROSA)26Sor | 1.19077     | 1.86961   | 0            | 1         | 1         |
| Lhfp14_j4     | 1.47676     | 2.25646   | 0            | 1         | 1         |
| Camk1_j4      | 0           | 0.24103   | 0            | 1         | 1         |
| Cidec_j1      | 0.0648896   | 0.35611   | 2.45627      | 0.0381956 | 0.217231  |
| Tmem111_j2    | 8.00757     | 10.2843   | 0            | 1         | 1         |
| Ghrl_j2       | 0.0596204   | 0.0494415 | 0            | 1         | 1         |
| Tmem40_j1     | 2.11E-05    | 0.249244  | 13.5296      | 0.987189  | 0.996309  |
| Mbd4_j1       | 0.259976    | 0.240634  | -0.111538    | 0.841783  | 0.950003  |
| Plxnd1_j7     | 11.1712     | 14.5411   | 0            | 1         | 1         |
| Plxnd1_j10    | 1.23843     | 1.38142   | 0            | 1         | 1         |
| Tmcc1_j6      | 0.202104    | 0.978809  | 0            | 1         | 1         |
| Tmem72_j3     | 0.338539    | 0.408077  | 0            | 1         | 1         |
| Fxyd4_j1      | 0           | 0.0523578 | 1.79769e+308 | 0.0375828 | 1         |
| Ret_j7        | 0.271099    | 0.415085  | 0            | 1         | 1         |
| Ret_j5        | 0           | 0.187647  | 0            | 1         | 1         |
| Ret_j6        | 0.054413    | 0.164788  | 0            | 1         | 1         |
| Bms1_j4       | 1.83406     | 3.43295   | 0            | 1         | 1         |
| Zfp248_j1     | 0.000145053 | 0.145518  | 0            | 1         | 1         |
| Cacna1c_j4    | 0           | 0.0493213 | 0            | 1         | 1         |

|                   |            |           |              |           |           |
|-------------------|------------|-----------|--------------|-----------|-----------|
| Lrtm2_j2          | 0          | 0.0553968 | 1.79769e+308 | 0.0469324 | 1         |
| Erc1_j4           | 1.38457    | 2.11008   | 0            | 1         | 1         |
| Erc1_j5           | 0.461444   | 0.298008  | 0            | 1         | 1         |
| Wnk1_j8           | 9.78849    | 9.09231   | 0            | 1         | 1         |
| Wnk1_j10          | 1.91131    | 1.8924    | 0            | 1         | 1         |
| Wnk1_j9           | 2.7537     | 2.62074   | 0            | 1         | 1         |
| Cecr5_j2          | 0.688699   | 0.798264  | 0            | 1         | 1         |
| Mical3_j3         | 0.881677   | 1.02708   | 0.220223     | 0.239777  | 0.587141  |
| Iqsec3            | 0.284721   | 0.212802  | 0            | 1         | 1         |
| Iqsec3_j5         | 1.14564    | 1.07884   | 0            | 1         | 1         |
| Phc1_j1           | 0.0967219  | 0.182562  | 0            | 1         | 1         |
| C1s_j10           | 0.117086   | 0.255392  | 1.12514      | 0.154677  | 0.487817  |
| Atn1_j1           | 0.451991   | 0.435896  | 0            | 1         | 1         |
| Eno2_j2           | 2.4958     | 3.52398   | 0            | 1         | 1         |
| Eno2_j4           | 32.5197    | 26.2203   | 0            | 1         | 1         |
| Lrrc23_j1         | 0.158366   | 0.196567  | 0            | 1         | 1         |
| Lrrc23_j2         | 0.0697569  | 0.0874599 | 0            | 1         | 1         |
| Lrrc23_j5         | 0.115956   | 0.133886  | 0            | 1         | 1         |
| Tpi1_j2           | 103.006    | 116.968   | 0            | 1         | 1         |
| Gnb3_j1           | 0          | 0.0827365 | 1.79769e+308 | 0.0894294 | 1         |
| Leprel2_j3        | 0.103016   | 0.388412  | 1.91472      | 1.25E-05  | 0.0003748 |
| Leprel2_j1        | 0.0306695  | 0.125275  | 2.03022      | 0.0087398 | 1         |
| Leprel2_j2        | 0.349723   | 0.129962  | -1.42812     | 0.0021395 | 0.0263255 |
| Cd4_j1            | 0.0998062  | 0.114512  | 0.198296     | 0.833654  | 1         |
| Lag3_j1           | 0          | 0.0831936 | 1.79769e+308 | 0.0555675 | 1         |
| Lag3_j2           | 0.0262484  | 0.127087  | 2.27551      | 0.122216  | 1         |
| Ptms_j2           | 0.0811164  | 0.063444  | 0            | 1         | 1         |
| Cops7a            | 8.89872    | 8.38731   | 0            | 1         | 1         |
| Ncapd2_j4         | 1.65141    | 1.45633   | -0.181368    | 0.337833  | 0.678381  |
| XLOC_028410       | 0.045477   | 0.0642909 | 0.499476     | 0.330506  | 1         |
| Dyrk4_j3          | 0          | 0.0844917 | 1.79769e+308 | 0.0540938 | 1         |
| AK033854_j1       | 0.0245967  | 0.0713951 | 0            | 1         | 1         |
| Klra2_j2          | 0.014237   | 0.106043  | 2.89692      | 0.250676  | 1         |
| Magohb_j1         | 0.990521   | 0.955917  | -0.0513014   | 0.91043   | 0.971772  |
| AK016696_j2       | 0.0768245  | 0.248951  | 0            | 1         | 1         |
| Slco1a4_j6        | 0.0854493  | 0.28228   | 1.72399      | 0.0073088 | 0.0680843 |
| Slco1a4_j5        | 0.463596   | 0.453135  | -0.0329268   | 0.93123   | 0.979039  |
| Slco1a4_j8        | 0.0838285  | 0.310872  | 1.89081      | 0.039033  | 0.220399  |
| Abcc9_j1          | 0          | 0.108946  | 1.79769e+308 | 0.0068208 | 1         |
| 5730419I09Rik_j11 | 0.92289    | 1.39726   | 0            | 1         | 1         |
| 5730419I09Rik_j10 | 1.3621     | 1.47378   | 0            | 1         | 1         |
| 5730419I09Rik_j13 | 0.631597   | 0.876863  | 0            | 1         | 1         |
| XLOC_028478       | 0          | 0.0488369 | 1.79769e+308 | 0.309048  | 1         |
| Sox5_j1           | 0          | 0.0918639 | 1.79769e+308 | 0.0245072 | 1         |
| Sox5_j2           | 0.00941092 | 0.0548317 | 2.5426       | 0.173061  | 1         |
| Bhlhe41_j2        | 11.0687    | 15.5108   | 0.486781     | 3.31E-07  | 1.55E-05  |
| Tmtc1_j2          | 0          | 0.160494  | 0            | 1         | 1         |



|                   |            |           |              |           |           |
|-------------------|------------|-----------|--------------|-----------|-----------|
| Tmtc1_j3          | 0.238906   | 0.272727  | 0            | 1         | 1         |
| Ipo8_j2           | 1.75728    | 1.59795   | 0            | 1         | 1         |
| Caprin2_j4        | 0          | 0.149893  | 0            | 1         | 1         |
| Dennd5b_j2        | 0.0291175  | 0.172853  | 0            | 1         | 1         |
| Dennd5b_j3        | 0.00232935 | 0.412088  | 0            | 1         | 1         |
| Col1a2_j6         | 3.52261    | 4.71172   | 0            | 1         | 1         |
| Casd1_j1          | 0.227865   | 0.366495  | 0            | 1         | 1         |
| Neurabin_j9       | 0          | 0.235777  | 0            | 1         | 1         |
| Glcci1_j1         | 0.202168   | 0.733485  | 1.85921      | 0.0014328 | 0.0190435 |
| Glcci1_j2         | 0.232736   | 0.036035  | -2.69122     | 0.0406651 | 0.226309  |
| Glcci1_j5         | 0.472594   | 0.41307   | -0.194214    | 0.725672  | 0.902548  |
| Glcci1_j11        | 0          | 0.706936  | 0            | 1         | 1         |
| Foxp2_j2          | 0          | 0.148364  | 1.79769e+308 | 0.0093934 | 1         |
| Met_j3            | 0.00693067 | 0.117184  | 4.07963      | 0.0413262 | 1         |
| A430107O13Rik_j2  | 0          | 0.0498223 | 1.79769e+308 | 0.021467  | 1         |
| Ptprz1_j1         | 0          | 0.050253  | 0            | 1         | 1         |
| Ptprz1_j2         | 1.16806    | 1.47731   | 0            | 1         | 1         |
| XLOC_027590       | 0.341421   | 0.466623  | 0            | 1         | 1         |
| 6530409C15Rik     | 0.0995492  | 0.390083  | 1.9703       | 0.0106579 | 0.0896973 |
| Arf5_j1           | 77.0791    | 84.6803   | 0.135688     | 0.199299  | 0.542218  |
| Snd1_j3           | 12.0993    | 11.1557   | 0            | 1         | 1         |
| Snd1_j4           | 2.07686    | 7.11014   | 0            | 1         | 1         |
| Ahcyl2_j4         | 2.31091    | 6.06547   | 0            | 1         | 1         |
| Fam40b_j3         | 0.488125   | 0.480719  | -0.0220563   | 0.949088  | 0.985323  |
| AK080631_j1       | 0.114476   | 0.179518  | 0.649079     | 0.6311    | 0.8565    |
| Gm13846_j1        | 0.030959   | 0.0551463 | 0.832906     | 0.531496  | 1         |
| AK080631_j4       | 0.216471   | 0.229017  | 0.0812829    | 0.924342  | 0.976334  |
| AK080631_j6       | 0.133037   | 0.335444  | 1.33425      | 0.29119   | 0.638466  |
| Exoc4_j4          | 0.143814   | 0.207006  | 0            | 1         | 1         |
| Lrguk_j4          | 0.275088   | 0.251027  | -0.13205     | 0.772296  | 0.922699  |
| Agbl3_j4          | 0.038113   | 0.178602  | 2.2284       | 0.01803   | 0.131132  |
| XLOC_027632       | 0.156179   | 0.133627  | -0.224986    | 0.799259  | 0.933125  |
| Nup205_j2         | 1.88508    | 2.101     | 0            | 1         | 1         |
| XLOC_027639       | 0.342488   | 0.439509  | 0.359842     | 0.323547  | 0.666591  |
| Ttc26_j1          | 0.553122   | 0.664196  | 0.264012     | 0.354278  | 0.690503  |
| Luc7l2_j12        | 0.115282   | 0.217951  | 0            | 1         | 1         |
| Tbxas1_j3         | 0.0260709  | 0.0851021 | 1.70676      | 0.396439  | 1         |
| AK016417_j1       | 3.03196    | 2.99471   | 0            | 1         | 1         |
| Agk_j5            | 0.48707    | 0.266859  | -0.868049    | 0.106242  | 0.404681  |
| Ssbp1_j1          | 1.18197    | 1.9477    | 0.720571     | 0.0392803 | 0.221307  |
| TCR-beta chain_j1 | 0.0368076  | 0.321107  | 3.12498      | 0.112105  | 0.416662  |
| Zyx_j1            | 0          | 0.09552   | 0            | 1         | 1         |
| Zyx_j4            | 12.3337    | 11.3531   | 0            | 1         | 1         |
| Arhgef5_j4        | 0.104602   | 0.111174  | 0.087907     | 0.925926  | 1         |
| Cntnap2_j4        | 0          | 0.0612492 | 1.79769e+308 | 0.175654  | 1         |
| Zfp398_j3         | 0.870268   | 0.70006   | -0.313981    | 0.12342   | 0.437384  |
| mKIAA4190_j7      | 0.511249   | 0.347584  | -0.556666    | 0.211355  | 0.556171  |

|                  |           |           |              |           |           |
|------------------|-----------|-----------|--------------|-----------|-----------|
| Krba1            | 0.0776649 | 0.253122  | 1.7045       | 4.66E-05  | 0.0011259 |
| Sspo_j24         | 0.0179825 | 0.0644252 | 1.84103      | 0.32051   | 1         |
| Al854703_j1      | 1.03156   | 2.47558   | 1.26293      | 1.30E-06  | 5.20E-05  |
| Al854703_j10     | 0.392923  | 0.266449  | -0.560386    | 0.235964  | 0.583297  |
| Gimap4_j2        | 0.0883826 | 0.10028   | 0.182203     | 0.88252   | 1         |
| Gimap5_j1        | 0.0607591 | 0.0655521 | 0.109542     | 0.930162  | 1         |
| Gimap5_j2        | 0.101839  | 0.113168  | 0.152174     | 0.866209  | 1         |
| Tmem176a_j1      | 2.98546   | 3.41491   | 0            | 1         | 1         |
| 2410003K15Rik_j5 | 0.276183  | 0.311274  | 0.172564     | 0.72095   | 0.900148  |
| Npy_j3           | 2.14599   | 40.2346   | 0            | 1         | 1         |
| AK043004_j2      | 0         | 0.0468272 | 1.79769e+308 | 0.120736  | 1         |
| AK043004_j3      | 0.0223649 | 0.167283  | 2.90298      | 0.0533373 | 0.268749  |
| Snx10_j4         | 0         | 0.164872  | 0            | 1         | 1         |
| Snx10_j5         | 14.6195   | 12.4223   | 0            | 1         | 1         |
| 5730446D14Rik_j1 | 0.90547   | 0.783186  | -0.209311    | 0.440698  | 0.749739  |
| Tax1bp1_j2       | 6.83691   | 6.80836   | 0            | 1         | 1         |
| Tax1bp1_j6       | 67.7027   | 70.919    | 0            | 1         | 1         |
| Creb5_j1         | 0.014697  | 0.0488184 | 0            | 1         | 1         |
| Chn2_j3          | 1.67899   | 1.34479   | 0            | 1         | 1         |
| Herc6_j1         | 0.0721    | 0.172193  | 1.25596      | 0.0326624 | 0.196592  |
| Abcg2_j4         | 16.4601   | 23.4414   | 0            | 1         | 1         |
| C130060K24Rik_j3 | 0.304922  | 0.281027  | -0.117732    | 0.809501  | 0.937655  |
| Mad2l1_j2        | 0.0987682 | 0.0976506 | -0.0164186   | 0.989375  | 1         |
| XLOC_027729      | 0.186797  | 0.219295  | 0.231403     | 0.700977  | 0.890108  |
| M34473           | 0.0287234 | 0.0731715 | 1.34906      | 0.583185  | 1         |
| Rnf103_j2        | 8.69448   | 8.52039   | 0            | 1         | 1         |
| Vps24_j6         | 39.5616   | 42.1278   | 0            | 1         | 1         |
| Immt_j11         | 0.143628  | 0.315768  | 0            | 1         | 1         |
| Suclg1_j4        | 61.9614   | 59.3247   | -0.0627381   | 0.512157  | 0.792031  |
| Reg3b_j1         | 0.0134836 | 0.559437  | 5.3747       | 0.227364  | 0.574588  |
| Reg1_j1          | 0.06507   | 1.89414   | 4.86341      | 2.03E-06  | 7.69E-05  |
| Loxl3_j3         | 0.0260234 | 0.192692  | 2.88842      | 0.0001    | 0.0021576 |
| Dctn1_j1         | 38.7645   | 39.3533   | 0            | 1         | 1         |
| Dctn1_j7         | 0         | 0.137808  | 0            | 1         | 1         |
| Dctn1_j11        | 84.2942   | 96.5152   | 0            | 1         | 1         |
| Mobkl1b_j1       | 2.13896   | 2.75205   | 0            | 1         | 1         |
| Nagk_j6          | 9.27225   | 9.14539   | 0            | 1         | 1         |
| Alms1_j7         | 0         | 0.0700541 | 1.79769e+308 | 0.0633384 | 1         |
| Alms1_j12        | 0.240966  | 0.315284  | 0.387821     | 0.347828  | 0.68643   |
| Alms1_j1         | 0.168077  | 0.187727  | 0.159514     | 0.905537  | 0.969961  |
| Add2_j3          | 6.5425    | 5.94119   | 0            | 1         | 1         |
| Tgfa_j1          | 0         | 0.233025  | 1.79769e+308 | 0.0001949 | 0.0037602 |
| Tia1_j7          | 0.859968  | 1.12162   | 0            | 1         | 1         |
| Tia1_j10         | 0         | 0.0694889 | 0            | 1         | 1         |
| C87436           | 0.865531  | 1.09365   | 0            | 1         | 1         |
| C87436_j2        | 0.218505  | 0.340972  | 0            | 1         | 1         |
| AK005503_j3      | 0         | 16.0529   | 0            | 1         | 1         |

|                  |           |           |              |           |           |
|------------------|-----------|-----------|--------------|-----------|-----------|
| Aak1_j8          | 5.98248   | 3.95456   | 0            | 1         | 1         |
| Aak1_j9          | 6.1798    | 5.6431    | 0            | 1         | 1         |
| Nfu1_j5          | 3.78478   | 4.93824   | 0            | 1         | 1         |
| Ccdc48_j6        | 0.178601  | 0.0660896 | -1.43425     | 0.296287  | 0.643078  |
| Gp9_j1           | 0.0741554 | 0.231385  | 1.64167      | 0.0789341 | 0.34087   |
| Gm5577_j1        | 0.058586  | 0.0494119 | -0.245698    | 0.836727  | 1         |
| Ruvbl1_j5        | 4.31416   | 4.5888    | 0.0890377    | 0.844306  | 0.950736  |
| Ruvbl1_j6        | 0         | 0.218761  | 1.79769e+308 | 0.141956  | 0.46851   |
| Ruvbl1_j10       | 0         | 0.0690199 | 1.79769e+308 | 0.315268  | 1         |
| MglI_j1          | 8.49369   | 9.94253   | 0            | 1         | 1         |
| Fbln2_j6         | 0         | 0.610972  | 0            | 1         | 1         |
| AK007770_j1      | 0.999494  | 0.840256  | -0.250369    | 0.732978  | 0.905795  |
| Tmem43_j1        | 2.58792   | 4.61668   | 0            | 1         | 1         |
| Slc6a6_j1        | 0         | 0.241101  | 0            | 1         | 1         |
| C130022K22Rik_j1 | 4.1981    | 4.13453   | -0.022013    | 0.904817  | 0.969711  |
| Fgd5_j3          | 0.413015  | 0.327246  | -0.335819    | 0.448911  | 0.755264  |
| 9530026P05Rik_j3 | 0         | 0.423327  | 1.79769e+308 | 3.95E-09  | 2.98E-07  |
| 9530026P05Rik_j2 | 1.05927   | 0.558388  | -0.923729    | 0.000196  | 0.0037768 |
| Mitf_j3          | 0         | 0.0618599 | 1.79769e+308 | 0.089082  | 1         |
| Mitf_j6          | 0         | 0.124139  | 1.79769e+308 | 0.0399452 | 1         |
| Cntn6_j2         | 0         | 0.102998  | 1.79769e+308 | 0.0634516 | 1         |
| Cntn6_j5         | 1.20406   | 0.980686  | -0.29604     | 0.482631  | 0.775777  |
| Cntn4_j9         | 1.1318    | 0.969111  | -0.223883    | 0.420216  | 0.736588  |
| Cntn4_j10        | 0.586472  | 0.527185  | -0.153755    | 0.590345  | 0.83654   |
| Lrrn1_j1         | 64.3955   | 50.4369   | 0            | 1         | 1         |
| Edem1_j3         | 0.700538  | 0.660146  | 0            | 1         | 1         |
| Setd5_j6         | 1.51404   | 1.44435   | -0.067991    | 0.709604  | 0.894305  |
| Setd5_j5         | 0.593151  | 0.553962  | -0.0986113   | 0.724407  | 0.901947  |
| Setd5_j4         | 1.64205   | 1.4576    | -0.171911    | 0.3477    | 0.686289  |
| Setd5_j7         | 0.618945  | 0.902985  | 0.544891     | 0.0251623 | 0.165002  |
| Brpf1_j7         | 0.695692  | 0.951751  | 0.452135     | 0.0984529 | 0.387939  |
| Ttll3_j4         | 1.58918   | 1.75474   | 0            | 1         | 1         |
| Jagn1_j2         | 0.244393  | 0.586357  | 0            | 1         | 1         |
| Il17rc_j3        | 0.0324237 | 0.147941  | 2.1899       | 0.0757654 | 1         |
| Fancd2_j6        | 0         | 0.0707681 | 1.79769e+308 | 0.102537  | 1         |
| Fancd2_j8        | 0.101152  | 0.241836  | 1.25751      | 0.123865  | 0.438501  |
| Atg7_j1          | 8.94104   | 7.87466   | 0            | 1         | 1         |
| Atg7_j2          | 5.49344   | 4.90929   | 0            | 1         | 1         |
| Pparg_j6         | 0         | 0.184713  | 1.79769e+308 | 0.011432  | 0.0945953 |
| March8_j7        | 0         | 0.201386  | 0            | 1         | 1         |
| Zfp637_j6        | 9.57479   | 12.7304   | 0.41097      | 0.006679  | 0.0635171 |
| Rasgef1a         | 2.82613   | 2.39072   | -0.241384    | 0.355663  | 0.691547  |
| Rasgef1a_j2      | 0         | 0.304688  | 1.79769e+308 | 0.0067245 | 0.0638004 |
| Dcp1b_j9         | 0.0650571 | 0.0617663 | -0.0748866   | 0.934533  | 1         |
| Rad52_j13        | 0.612246  | 0.782384  | 0.353764     | 0.552706  | 0.816696  |
| Kdm5a_j6         | 0.150336  | 0.234599  | 0            | 1         | 1         |
| Cecr2_j1         | 0.125559  | 0.139703  | 0.153993     | 0.850142  | 1         |

|                  |            |           |              |           |           |
|------------------|------------|-----------|--------------|-----------|-----------|
| Slc6a13_j6       | 0          | 0.10555   | 1.79769e+308 | 0.114263  | 1         |
| Slc6a12_j1       | 0          | 0.110215  | 1.79769e+308 | 0.0336141 | 1         |
| XLOC_027904      | 0.108101   | 0.288451  | 1.41595      | 0.229317  | 0.576415  |
| Foxj2_j1         | 0.174633   | 0.0986053 | 0            | 1         | 1         |
| Clec4n           | 8.85E-06   | 0.141631  | 13.9669      | 0.994603  | 1         |
| Cd163            | 0.201888   | 0.211446  | 0.0667363    | 0.880076  | 0.961682  |
| C530028O21Rik_j1 | 4.78671    | 3.64587   | 0            | 1         | 1         |
| C530028O21Rik_j3 | 3.80471    | 2.09313   | 0            | 1         | 1         |
| Zfp384_j6        | 0.454211   | 0.559969  | 0            | 1         | 1         |
| Acrbp_j11        | 0.477757   | 0.446475  | -0.0976976   | 0.759549  | 0.91718   |
| Lpar5_j1         | 4.79992    | 4.01888   | -0.256215    | 0.032739  | 0.196931  |
| Chd4_j2          | 0          | 0.147924  | 0            | 1         | 1         |
| Nop2_j1          | 3.05834    | 3.3072    | 0            | 1         | 1         |
| XLOC_027935      | 0.055866   | 0.113124  | 1.01786      | 0.420377  | 1         |
| Fgf23            | 0.0636033  | 0.159322  | 1.32477      | 0.22302   | 0.570025  |
| Tspan11_j1       | 0.108517   | 0.162896  | 0.586033     | 0.460231  | 0.761799  |
| Clec1b_j1        | 0.0835587  | 0.163563  | 0.968989     | 0.293058  | 0.640091  |
| 8430419L09Rik_j2 | 0.237176   | 0.436695  | 0            | 1         | 1         |
| Ptpro_j1         | 0.964676   | 2.39473   | 1.31175      | 4.53E-12  | 5.84E-10  |
| Ptpro            | 0          | 0.415554  | 1.79769e+308 | 0.000112  | 0.0023696 |
| Plekha5_j8       | 0.253434   | 0.261907  | 0.0474476    | 0.883503  | 0.963029  |
| AK045625         | 0.285426   | 0.27364   | -0.0608357   | 0.925061  | 0.976735  |
| Lrmp_j4          | 0.0694019  | 0.0748723 | 0.109457     | 0.902237  | 1         |
| XLOC_028007      | 0.199111   | 0.172513  | 0            | 1         | 1         |
| Rassf8_j5        | 0.323815   | 0.428222  | 0            | 1         | 1         |
| Arntl2_j7        | 0.0216728  | 0.156037  | 2.84793      | 0.0349442 | 1         |
| Ppfibp1_j3       | 4.70768    | 4.37822   | 0            | 1         | 1         |
| Ppfibp1_j4       | 0          | 0.595979  | 0            | 1         | 1         |
| Ccdc91_j3        | 8.17044    | 8.83784   | 0            | 1         | 1         |
| Far2             | 0.578908   | 0.624875  | 0            | 1         | 1         |
| Bicd1_j2         | 0.889675   | 1.46158   | 0            | 1         | 1         |
| AK035387_j3      | 0.726813   | 0.676336  | -0.103844    | 0.710845  | 0.894919  |
| Pon3_j4          | 0          | 0.137833  | 1.79769e+308 | 0.0713501 | 1         |
| Slc25a13_j2      | 0.0247624  | 0.0743938 | 1.58703      | 0.222124  | 1         |
| Asns_j5          | 8.26341    | 10.3919   | 0            | 1         | 1         |
| Col28a1_j1       | 4.46342    | 3.8596    | 0            | 1         | 1         |
| Rpa3_j3          | 0.324143   | 0.304252  | -0.091365    | 0.929599  | 0.978386  |
| Rpa3_j4          | 0.391137   | 0.340208  | -0.201259    | 0.804509  | 0.935237  |
| Ica1_j5          | 1.99281    | 2.46766   | 0            | 1         | 1         |
| Ica1_j6          | 4.27079    | 8.20833   | 0            | 1         | 1         |
| Ndufa4_j1        | 211.921    | 230.252   | 0.119688     | 0.286856  | 0.635459  |
| XLOC_028052      | 0.0731887  | 0.153999  | 1.07323      | 0.438484  | 1         |
| B630005N14Rik_j1 | 0.924026   | 0.935005  | 0.0170415    | 0.951918  | 0.986165  |
| Gpr85_j6         | 0.00156917 | 1.26693   | 0            | 1         | 1         |
| 2610001J05Rik_j3 | 0          | 0.980863  | 1.79769e+308 | 0.015429  | 0.117303  |
| Cttnbp2_j4       | 1.26582    | 2.63449   | 0            | 1         | 1         |
| Fam3c_j1         | 3.86085    | 2.35344   | 0            | 1         | 1         |

|              |            |           |              |           |           |
|--------------|------------|-----------|--------------|-----------|-----------|
| Cadps2_j3    | 1.98351    | 1.07504   | 0            | 1         | 1         |
| Grm8_j6      | 2.39199    | 2.42054   | 0.0171182    | 0.939192  | 0.981504  |
| Grm8_j10     | 0.593904   | 0.455483  | -0.382832    | 0.451044  | 0.756361  |
| Zfp800_j1    | 0.0001914  | 0.262635  | 10.4223      | 0.80852   | 0.937072  |
| Rbm28_j3     | 0.496077   | 0.815018  | 0.716268     | 0.0256434 | 0.167235  |
| Impdh1_j1    | 5.10336    | 11.127    | 0            | 1         | 1         |
| Kcp_j5       | 0.108901   | 0.146716  | 0.430018     | 0.536771  | 1         |
| Zc3hc1_j3    | 1.20195    | 2.45101   | 1.028        | 0.0104358 | 0.0882249 |
| Copg2_j1     | 0.203072   | 0.25435   | 0            | 1         | 1         |
| Podxl_j2     | 0.216268   | 0.156467  | 0            | 1         | 1         |
| Slc35b4_j2   | 0.262633   | 0.271327  | 0            | 1         | 1         |
| Zc3hav1_j7   | 0.153574   | 0.269643  | 0            | 1         | 1         |
| Hipk2_j2     | 1.34975    | 1.58457   | 0            | 1         | 1         |
| Dennd2a_j2   | 0.0892921  | 0.0671413 | 0            | 1         | 1         |
| Mrps33_j1    | 20.3459    | 20.5946   | 0.0175291    | 0.91756   | 0.974311  |
| Clec5a_j1    | 0.0111203  | 0.0938136 | 3.07661      | 0.350457  | 1         |
| Clec5a       | 0          | 0.107627  | 1.79769e+308 | 0.0635244 | 1         |
| Fam115a_j1   | 3.99565    | 2.85653   | 0            | 1         | 1         |
| Zfp786_j1    | 0          | 0.0480946 | 1.79769e+308 | 0.0533237 | 1         |
| Tmem176b_j3  | 11.0439    | 21.5166   | 0            | 1         | 1         |
| Tra2a_j2     | 0.618633   | 0.095663  | 0            | 1         | 1         |
| Tra2a_j3     | 0.379693   | 0.380966  | 0            | 1         | 1         |
| Osbp13_j8    | 1.66545    | 8.71021   | 0            | 1         | 1         |
| Hnrnpa2b1_j2 | 0.0348852  | 0.0909661 | 1.38271      | 0.158682  | 1         |
| Hoxa3_j1     | 0.365457   | 0.333795  | 0            | 1         | 1         |
| Hoxa4_j1     | 0          | 0.117801  | 1.79769e+308 | 0.086296  | 1         |
| Hoxa5_j1     | 1.87013    | 1.98878   | 0            | 1         | 1         |
| Hoxa7_j2     | 0.861306   | 0.745007  | 0            | 1         | 1         |
| Hibadh_j2    | 0.139235   | 0.0682407 | -1.02881     | 0.448812  | 0.755217  |
| Nod1_j1      | 0.885951   | 0.933475  | 0.075384     | 0.822943  | 0.942847  |
| Crhr2_j5     | 7.67E-05   | 0.0982092 | 10.3218      | 0.946245  | 1         |
| Ppm1k_j2     | 0.169862   | 0.328041  | 0.949509     | 0.113161  | 0.418717  |
| Vopp1_j1     | 0.0721709  | 3.69881   | 0            | 1         | 1         |
| AK043607_j1  | 0.0467249  | 0.110582  | 1.24286      | 0.187444  | 1         |
| Gadd45a_j5   | 0          | 2.16304   | 1.79769e+308 | 0.000118  | 0.0024694 |
| Rpia_j2      | 0.485791   | 1.08407   | 1.15805      | 0.0105579 | 0.0889941 |
| Smyd1_j1     | 0.00172931 | 0.114716  | 6.05172      | 0.194827  | 1         |
| Rnf181_j3    | 17.9724    | 22.0417   | 0            | 1         | 1         |
| Sh2d6_j3     | 0.109199   | 0.0718211 | -0.604476    | 0.727577  | 1         |
| Tcf7l1_j1    | 1.18458    | 0.938372  | -0.336149    | 0.251002  | 0.598849  |
| Kcmf1_j1     | 21.8685    | 23.2102   | 0            | 1         | 1         |
| Tmsb10_j2    | 122.029    | 184.812   | 0.598839     | 3.28E-10  | 2.98E-08  |
| XLOC_028221  | 0          | 0.539672  | 1.79769e+308 | 0.0126862 | 0.102195  |
| Ctnna2_j2    | 35.4682    | 47.3088   | 0            | 1         | 1         |
| Ctnna2_j16   | 17.501     | 18.0746   | 0            | 1         | 1         |
| Hk2_j2       | 0.122404   | 0.0932341 | -0.39272     | 0.63406   | 1         |
| Sema4f_j5    | 13.6654    | 26.5776   | 0            | 1         | 1         |

|                  |           |           |              |           |           |
|------------------|-----------|-----------|--------------|-----------|-----------|
| Sema4f_j4        | 7.9131    | 13.3866   | 0            | 1         | 1         |
| Htra2_j1         | 0.0356057 | 0.12573   | 1.82014      | 0.0412823 | 1         |
| AK161590_j2      | 0.183913  | 0.433225  | 1.23609      | 0.0181138 | 0.131624  |
| AK161590_j1      | 1.33461   | 1.04579   | -0.351823    | 0.179614  | 0.519339  |
| Wbp1_j4          | 0.422029  | 1.70381   | 0            | 1         | 1         |
| Wbp1_j7          | 0.545628  | 1.23247   | 0            | 1         | 1         |
| Mthfd2_j1        | 2.88433   | 2.65641   | 0            | 1         | 1         |
| Tet3_j3          | 0.15848   | 0.206513  | 0            | 1         | 1         |
| Stambp_j1        | 3.01373   | 4.81179   | 0            | 1         | 1         |
| Sfxn5_j3         | 4.97122   | 3.85204   | 0            | 1         | 1         |
| Dusp11_j1        | 3.07183   | 4.12795   | 0            | 1         | 1         |
| Dusp11_j2        | 1.34194   | 1.78952   | 0            | 1         | 1         |
| Gmcl1_j3         | 10.0273   | 10.8191   | 0            | 1         | 1         |
| Arhgap25_j6      | 0.107467  | 0.344365  | 1.68004      | 0.0196377 | 0.139169  |
| AK131825_j5      | 0         | 0.0854436 | 1.79769e+308 | 0.0910952 | 1         |
| XLOC_028267      | 0         | 0.287108  | 1.79769e+308 | 0.007764  | 0.0710481 |
| Abtb1_j5         | 3.85902   | 6.64572   | 0            | 1         | 1         |
| Mcm2_j1          | 0.0386397 | 0.181387  | 2.23091      | 0.0154907 | 0.117492  |
| Iqsec1_j1        | 13.0275   | 9.86604   | 0            | 1         | 1         |
| Nup210_j2        | 0.164911  | 0.428459  | 1.37747      | 0.00276   | 0.0322486 |
| Wnt7a_j1         | 0.973507  | 0.860173  | -0.178565    | 0.522688  | 0.798994  |
| Xpc_j2           | 1.11696   | 1.24837   | 0            | 1         | 1         |
| Grip2_j1         | 0.21947   | 0.377304  | 0            | 1         | 1         |
| Zfyve20_j3       | 0.45226   | 0.555475  | 0            | 1         | 1         |
| Adamts9_j4       | 0.730963  | 0.297575  | -1.29655     | 0.0006777 | 0.0104546 |
| Magi1_j3         | 0.211248  | 0.585851  | 0            | 1         | 1         |
| Magi1_j6         | 0.0848636 | 0         | 0            | 1         | 1         |
| Uba3_j6          | 2.47819   | 8.1546    | 0            | 1         | 1         |
| Gm765_j5         | 5.39247   | 3.37926   | 0            | 1         | 1         |
| Foxp1_j4         | 0.463527  | 0.387703  | 0            | 1         | 1         |
| Eif4e3_j3        | 3.96006   | 4.58451   | 0            | 1         | 1         |
| XLOC_028306      | 0.0827883 | 0.171793  | 1.05317      | 0.119397  | 0.429995  |
| Shq1_j3          | 0.0410613 | 0.182659  | 2.1533       | 0.0342464 | 0.202769  |
| Pdzrn3_j1        | 1.73E-05  | 0.234056  | 13.7216      | 0.963569  | 0.989788  |
| Cntn3_j5         | 0         | 0.0743512 | 1.79769e+308 | 0.0103132 | 1         |
| Srgap3_j4        | 0.0442285 | 0.0884243 | 0.999467     | 0.148608  | 1         |
| Srgap3           | 0.837311  | 0.145892  | -2.52087     | 3.57E-11  | 4.00E-09  |
| Gt(ROSA)26Sor_j1 | 3.51574   | 2.9902    | 0            | 1         | 1         |
| Camk1_j2         | 0         | 0.74854   | 0            | 1         | 1         |
| Prرت3_j2         | 4.66745   | 6.03024   | 0.36958      | 0.001196  | 0.0165048 |
| Atp2b2_j1        | 3.30639   | 3.58116   | 0            | 1         | 1         |
| Atp2b2_j4        | 0.535016  | 0.368933  | 0            | 1         | 1         |
| Raf1_j2          | 5.14629   | 5.88021   | 0            | 1         | 1         |
| Tmem40           | 0         | 0.128124  | 1.79769e+308 | 0.0541415 | 1         |
| Tmem40_j3        | 0.069495  | 0.208651  | 1.58611      | 0.199136  | 0.542198  |
| BC060267_j3      | 0         | 0.0532699 | 1.79769e+308 | 0.122376  | 1         |
| BC060267_j6      | 3.63E-05  | 0.242165  | 12.7035      | 0.930371  | 0.978661  |

|             |             |           |              |           |           |
|-------------|-------------|-----------|--------------|-----------|-----------|
| Plxnd1_j9   | 2.75003     | 3.3947    | 0            | 1         | 1         |
| Tmem72_j2   | 0.822426    | 0.556554  | 0            | 1         | 1         |
| Ret_j4      | 68.0722     | 79.2013   | 0            | 1         | 1         |
| Ret_j3      | 8.93854     | 13.4736   | 0            | 1         | 1         |
| Ret_j12     | 47.0771     | 69.1828   | 0            | 1         | 1         |
| Ankrd26_j2  | 0.218963    | 0.484269  | 0            | 1         | 1         |
| Cacna1c_j1  | 3.01607     | 1.12636   | 0            | 1         | 1         |
| Lrtm2_j1    | 0.000647082 | 0.119217  | 7.52542      | 0.435023  | 1         |
| Adipor2_j1  | 1.03524     | 1.14552   | 0.14603      | 0.58598   | 0.834212  |
| Erc1_j7     | 0.197783    | 0.310674  | 0            | 1         | 1         |
| Wnk1_j6     | 0.945688    | 0.80117   | 0            | 1         | 1         |
| B4galnt3_j2 | 0.0186363   | 0.0649802 | 1.80188      | 0.198283  | 1         |
| Atp6v1e1_j2 | 29.7058     | 40.5264   | 0            | 1         | 1         |
| Bid_j1      | 1.54857     | 2.52838   | 0            | 1         | 1         |
| Mical3_j5   | 0.33165     | 0.586736  | 0.823052     | 0.0519581 | 0.264508  |
| Mical3_j6   | 1.18969     | 1.02547   | -0.214299    | 0.431984  | 0.74396   |
| Mical3_j5   | 0.0499144   | 0.241928  | 2.27705      | 7.11E-05  | 0.0016051 |
| Iqsec3_j7   | 1.89842     | 2.53103   | 0            | 1         | 1         |
| Phc1_j6     | 0.314984    | 0.579415  | 0            | 1         | 1         |
| Apobec1_j5  | 0.089885    | 0.454185  | 2.33713      | 0.0068162 | 0.0645073 |
| Slc2a3_j8   | 2.26311     | 2.36844   | 0            | 1         | 1         |
| Pex5_j3     | 2.13517     | 3.18619   | 0            | 1         | 1         |
| Ptpn6       | 0           | 0.254276  | 1.79769e+308 | 0.0026454 | 0.0311971 |
| Atn1_j2     | 1.18316     | 0.903885  | 0            | 1         | 1         |
| Lrrc23_j4   | 0           | 0.0853997 | 0            | 1         | 1         |
| Usp5_j3     | 0.0735969   | 0.310704  | 0            | 1         | 1         |
| Leprel2_j7  | 0.674552    | 0.865648  | 0.359851     | 0.234257  | 0.581678  |
| Ptms_j4     | 170.717     | 182.966   | 0            | 1         | 1         |
| Cd9_j3      | 268.416     | 309.214   | 0            | 1         | 1         |
| Dyrk4_j9    | 0.0339453   | 0.0525711 | 0.63106      | 0.66981   | 1         |
| Rad51ap1    | 0.267114    | 0.0700175 | -1.93167     | 0.318662  | 0.662021  |
| Ccnd2_j1    | 0           | 0.067423  | 1.79769e+308 | 0.0103571 | 1         |
| XLOC_028421 | 0.363029    | 0.880964  | 0            | 1         | 1         |
| Fkbp4_j2    | 0.391872    | 0.85689   | 0            | 1         | 1         |
| BC048546_j2 | 22.4258     | 12.8814   | 0            | 1         | 1         |
| Klrb1a_j2   | 0           | 0.18766   | 1.79769e+308 | 0.0464083 | 0.246963  |
| Clec7a_j2   | 0.0445083   | 0.136489  | 1.61664      | 0.157092  | 1         |
| Klra2_j1    | 0.0819412   | 0.177839  | 1.11791      | 0.159338  | 0.493926  |
| Gm5886_j1   | 0           | 0.0662795 | 1.79769e+308 | 0.150809  | 1         |
| AK016696_j1 | 0.406192    | 0.433414  | 0            | 1         | 1         |
| Lrp6_j2     | 0.429548    | 1.15707   | 0            | 1         | 1         |
| Wbp11_j3    | 7.78725     | 9.92166   | 0            | 1         | 1         |
| Arhgdib_j3  | 0           | 0.254265  | 1.79769e+308 | 0.0310188 | 0.189865  |
| Rerg_j1     | 0.0269938   | 0.10077   | 1.90037      | 0.258829  | 1         |
| Slc15a5_j5  | 0.0375683   | 0.152982  | 2.02578      | 0.146921  | 1         |
| Slco1a4_j1  | 0.457755    | 0.578227  | 0.337061     | 0.396196  | 0.721006  |
| Kcnj8       | 0.079389    | 0.444363  | 2.48473      | 0.001895  | 0.0239282 |

|                  |           |                 |           |           |           |
|------------------|-----------|-----------------|-----------|-----------|-----------|
| 5730419I09Rik_j2 | 0.835242  | 2.50525         | 0         | 1         | 1         |
| 4933424B01Rik_j1 | 2.17167   | 2.29215         | 0         | 1         | 1         |
| 4933424B01Rik_j2 | 3.07146   | 3.26169         | 0         | 1         | 1         |
| Ergic2           | 0.231014  | 0.651683        | 0         | 1         | 1         |
| Ergic2_j2        | 1.41416   | 1.17729         | 0         | 1         | 1         |
| Caprin2_j2       | 0         | 0.296611        | 0         | 1         | 1         |
| Caprin2_j3       | 0.0822341 | 0.371289        | 0         | 1         | 1         |
| Dennd5b_j4       | 1.56732   | 1.51909         | 0         | 1         | 1         |
| Myadm            | 1.25185   | 1.99655         | 0         | 1         | 1         |
| Myadm            | 2.035     | 2.86869         | 0         | 1         | 1         |
| Prkcc_j2         | 0.100523  | 0 -1.79769e+308 | 0.012083  |           | 1         |
| Cacng7_j1        | 0.259542  | 0.294323        | 0.181429  | 0.873812  | 0.959888  |
| Cacng8_j2        | 0.279503  | 0.0146069       | -4.25814  | 0.0678506 | 0.311782  |
| Ndufa3_j1        | 103.644   | 88.2717         | -0.231616 | 0.141519  | 0.468008  |
| Prpf31           | 2.13829   | 2.38209         | 0         | 1         | 1         |
| Rps9_j4          | 100.167   | 126.127         | 0.332477  | 0.0003813 | 0.0065214 |
| Rps9_j5          | 2.48081   | 4.28233         | 0.787583  | 0.0254993 | 0.166562  |
| Leng8_j1         | 9.21882   | 9.88144         | 0         | 1         | 1         |
| Lilra5_j3        | 0.0775315 | 0.0191678       | -2.0161   | 0.270568  | 1         |
| Eps8l1_j1        | 0.405264  | 0.466408        | 0         | 1         | 1         |
| Brsk1            | 31.4406   | 24.6746         | 0         | 1         | 1         |
| Suv420h2_j1      | 0.0608338 | 0.0131624       | -2.20845  | 0.377471  | 1         |
| Suv420h2_j5      | 0.314714  | 0.0703971       | -2.16045  | 0.0066072 | 0.0629524 |
| Rpl28_j1         | 0.660494  | 0.499351        | -0.403493 | 0.348772  | 0.686735  |
| Isoc2a_j1        | 0.325054  | 0.130786        | -1.31347  | 0.155063  | 0.488311  |
| Isoc2a_j5        | 2.52856   | 2.07479         | -0.285347 | 0.422652  | 0.738516  |
| Isoc2a_j6        | 2.01991   | 1.16978         | -0.788053 | 0.107828  | 0.408201  |
| Zfp628_j2        | 0.342311  | 0.311428        | 0         | 1         | 1         |
| Zfp628_j4        | 0.192581  | 0.0228093       | 0         | 1         | 1         |
| Nat14            | 1.53624   | 1.33415         | 0         | 1         | 1         |
| A430110N23Rik    | 0.421302  | 0.275476        | -0.612927 | 0.0914752 | 0.371729  |
| A430110N23Rik_j6 | 0.727619  | 0.42231         | -0.784882 | 0.103355  | 0.398535  |
| U2af2_j3         | 0.269671  | 0               | 0         | 1         | 1         |
| U2af2_j7         | 2.55817   | 3.34084         | 0         | 1         | 1         |
| Epn1_j9          | 0.992404  | 1.0055          | 0         | 1         | 1         |
| Zfp444_j4        | 0.0972832 | 0 -1.79769e+308 | 0.0002591 |           | 1         |
| Zfp667_j1        | 1.07296   | 0.726244        | -0.563072 | 0.0495687 | 0.256988  |
| Zfp667_j2        | 0.268201  | 0.192578        | -0.477876 | 0.37973   | 0.711031  |
| AK038886_j2      | 0.365117  | 0.61175         | 0.744583  | 0.0164304 | 0.122727  |
| Zfp78            | 0.284206  | 0.412004        | 0.535721  | 0.145401  | 0.473254  |
| Zfp78_j1         | 0.0819992 | 0.0220627       | -1.894    | 0.138663  | 1         |
| Zfp78_j3         | 0.483735  | 0.347714        | -0.476314 | 0.406671  | 0.727764  |
| Zfp28_j1         | 0.295039  | 0.20799         | -0.50439  | 0.348493  | 0.686685  |
| Zfp28_j7         | 0.168609  | 0.134801        | -0.322852 | 0.457327  | 0.760373  |
| Zfp28_j8         | 0.329574  | 0.23193         | -0.50691  | 0.241073  | 0.588215  |
| Gm16532          | 1.67194   | 0.840919        | -0.991485 | 4.10E-05  | 0.0010071 |
| Zfp418           | 0.624436  | 0.622068        | 0         | 1         | 1         |



|             |           |                 |            |           |           |
|-------------|-----------|-----------------|------------|-----------|-----------|
| Zfp606      | 1.32441   | 1.40265         | 0.0828003  | 0.643196  | 0.862237  |
| Zfp110      | 2.01537   | 2.34752         | 0          | 1         | 1         |
| Zfp128      | 1.65485   | 1.63484         | -0.0175574 | 0.920949  | 0.975248  |
| Rps5        | 10.6761   | 13.4184         | 0.329831   | 0.0139203 | 0.109022  |
| Rps5_j1     | 7.05332   | 5.84825         | -0.270296  | 0.337777  | 0.678324  |
| Zfp324      | 0.580436  | 0.305153        | 0          | 1         | 1         |
| Zfp446      | 0.648724  | 0.837899        | 0.369171   | 0.131526  | 0.451411  |
| Zfp446_j1   | 0.611444  | 0.210883        | -1.53578   | 0.0002113 | 0.0040183 |
| Zfp446_j5   | 0.2931    | 0.0469667       | -2.64168   | 0.0067835 | 0.064247  |
| Trim28_j3   | 0.0860928 | 0.152384        | 0          | 1         | 1         |
| Gm4879      | 14.4342   | 15.479          | 0.100822   | 0.402904  | 0.726049  |
| Lig1_j1     | 0.539541  | 0.617677        | 0          | 1         | 1         |
| Lig1        | 1.52177   | 1.13178         | 0          | 1         | 1         |
| Kptn_j3     | 0.360825  | 0.366891        | 0          | 1         | 1         |
| Meis3_j2    | 9.45456   | 10.2492         | 0.116427   | 0.352759  | 0.689566  |
| Zc3h4_j1    | 1.1459    | 0.513742        | 0          | 1         | 1         |
| Zc3h4_j8    | 0.779489  | 0.290924        | 0          | 1         | 1         |
| Tmem160     | 5.23801   | 5.70193         | 0.122432   | 0.342498  | 0.682278  |
| Tmem160_j1  | 7.49582   | 8.23452         | 0.135598   | 0.705939  | 0.892502  |
| XLOC_029499 | 0.14409   | 0.0814001       | -0.823867  | 0.123522  | 0.437613  |
| Ap2s1       | 125.225   | 142.972         | 0.191208   | 0.0335318 | 0.200119  |
| Slc1a5      | 3.94141   | 2.72446         | 0          | 1         | 1         |
| Slc1a5_j1   | 5.38892   | 6.95755         | 0          | 1         | 1         |
| Strn4       | 12.9085   | 14.4748         | 0          | 1         | 1         |
| Prkd2       | 0.171427  | 0.0476313       | -1.84762   | 0.0537554 | 0.270102  |
| Dact3       | 9.67249   | 7.95837         | -0.281415  | 0.0247358 | 0.163072  |
| Gng8_j1     | 3.06072   | 2.47902         | 0          | 1         | 1         |
| Gng8_j8     | 0.913441  | 0.810635        | 0          | 1         | 1         |
| Ptgir       | 1.55346   | 1.16727         | 0          | 1         | 1         |
| Pnmal1_j1   | 0.596089  | 0.372967        | 0          | 1         | 1         |
| Psg16_j2    | 0.0806033 | 0 -1.79769e+308 | 0.0078223  |           | 1         |
| Mill2_j1    | 0.545243  | 0.512474        | 0          | 1         | 1         |
| Nova2       | 1.01729   | 0.996639        | -0.0295853 | 0.918315  | 0.974532  |
| Mypop       | 5.26858   | 4.80572         | 0          | 1         | 1         |
| Sympk_j1    | 8.34078   | 5.12882         | 0          | 1         | 1         |
| Dmwd_j1     | 7.55743   | 7.44327         | 0          | 1         | 1         |
| Dmwd        | 7.57664   | 7.86789         | 0          | 1         | 1         |
| Dmpk_j8     | 0.0332238 | 0.0534993       | 0          | 1         | 1         |
| Dmpk_j9     | 0.502554  | 0.620995        | 0          | 1         | 1         |
| Dmpk        | 0         | 0.0853194       | 0          | 1         | 1         |
| Dmpk_j10    | 0.27765   | 0.341826        | 0          | 1         | 1         |
| Six5        | 0.499431  | 0.707425        | 0.502291   | 0.13345   | 0.454533  |
| Six5_j1     | 0.619721  | 0.53142         | -0.221766  | 0.46973   | 0.76774   |
| Snrpd2_j2   | 10.794    | 13.3056         | 0          | 1         | 1         |
| Eml2_j1     | 2.72788   | 1.47692         | -0.88519   | 0.0002511 | 0.0046392 |
| Eml2_j7     | 0.0623312 | 0 -1.79769e+308 | 0.0388815  |           | 1         |
| Eml2_j6     | 0.321274  | 0 -1.79769e+308 | 2.41E-05   | 0.0006457 |           |

|                  |           |                 |             |           |          |
|------------------|-----------|-----------------|-------------|-----------|----------|
| Gpr4             | 0.325945  | 0.488004        | 0.582265    | 0.11966   | 0.430544 |
| Opa3             | 14.3178   | 14.2693         | -0.00488992 | 0.957907  | 0.987996 |
| Rtn2             | 32.4903   | 30.5677         | 0           | 1         | 1        |
| Rtn2             | 25.3791   | 24.4165         | 0           | 1         | 1        |
| Ercc1            | 5.70693   | 6.33104         | 0.149727    | 0.259029  | 0.607803 |
| Ercc2            | 4.80684   | 5.18239         | 0.108528    | 0.405014  | 0.726949 |
| Exoc3l2_j1       | 0.547801  | 0.441672        | -0.310676   | 0.369546  | 0.702947 |
| Exoc3l2_j4       | 0.195584  | 0.0121101       | -4.01351    | 0.0627605 | 0.296706 |
| Trappc6a_j1      | 8.02978   | 9.23531         | 0.2018      | 0.0902034 | 0.368765 |
| Nkpd1_j1         | 0.392979  | 0.5457          | 0.473656    | 0.184384  | 0.524877 |
| Nkpd1_j3         | 0.275773  | 9.48E-05        | -11.5056    | 0.914604  | 0.973351 |
| Vmn1r183         | 0.228274  | 0.450871        | 0.981948    | 0.0292264 | 0.182389 |
| Zfp180           | 4.26357   | 4.41223         | 0           | 1         | 1        |
| Zfp180_j2        | 8.15805   | 8.04201         | 0           | 1         | 1        |
| Zfp235_j2        | 0.179189  | 0.288829        | 0           | 1         | 1        |
| Kcnn4            | 4.36483   | 3.52777         | 0           | 1         | 1        |
| Kcnn4            | 2.64335   | 2.50781         | 0           | 1         | 1        |
| 1500002O20Rik_j1 | 0.0546931 | 0 -1.79769e+308 |             | 0.0094529 | 1        |
| 1500002O20Rik_j4 | 0.0799662 | 0.264551        | 1.72608     | 0.0554806 | 0.275223 |
| Plaur_j2         | 0.8389    | 1.00609         | 0.262188    | 0.473698  | 0.7701   |
| Plaur_j4         | 0.280986  | 0.264732        | -0.0859672  | 0.922097  | 0.975613 |
| Irgq             | 17.3267   | 15.0077         | 0           | 1         | 1        |
| Irgq_j1          | 1.33836   | 1.44374         | 0           | 1         | 1        |
| Xrcc1_j1         | 0.384781  | 0.360946        | -0.0922565  | 0.85219   | 0.953098 |
| Ceacam10         | 2.94063   | 2.20592         | -0.414746   | 0.0826654 | 0.350424 |
| Gm9844           | 256.973   | 388.484         | 0.596237    | 8.41E-12  | 1.04E-09 |
| Rps19_j1         | 0.717244  | 1.59403         | 0           | 1         | 1        |
| Rps19_j4         | 2.75246   | 1.93929         | 0           | 1         | 1        |
| Rps19_j3         | 0.149711  | 0.124874        | 0           | 1         | 1        |
| Arhgef1_j1       | 0.312377  | 0.48922         | 0           | 1         | 1        |
| Arhgef1_j4       | 0.38701   | 0.215002        | 0           | 1         | 1        |
| Arhgef1_j5       | 0.96656   | 0.98274         | 0           | 1         | 1        |
| Arhgef1_j9       | 2.0578    | 2.49367         | 0           | 1         | 1        |
| Zfp574           | 0.266668  | 0.345224        | 0.37249     | 0.325093  | 0.668265 |
| Zfp574           | 0.349303  | 0.367299        | 0.0724743   | 0.827799  | 0.944579 |
| XLOC_029563      | 0.46474   | 0.706165        | 0.603581    | 0.0765577 | 0.334401 |
| AK142847         | 35.2217   | 39.8167         | 0.176907    | 0.0799843 | 0.343791 |
| Zfp526           | 1.44962   | 1.29463         | 0           | 1         | 1        |
| Zfp526_j1        | 1.02901   | 1.1024          | 0           | 1         | 1        |
| Cic              | 3.07931   | 2.67579         | 0           | 1         | 1        |
| Cic_j2           | 0.0986983 | 0.087536        | 0           | 1         | 1        |
| Cic_j4           | 0.0967988 | 0.179091        | 0           | 1         | 1        |
| Tmem145          | 0.51803   | 1.12499         | 0           | 1         | 1        |
| Tmem145_j2       | 1.83011   | 1.57845         | 0           | 1         | 1        |
| Megf8            | 6.08819   | 3.99596         | -0.607471   | 3.01E-08  | 1.89E-06 |
| Megf8_j5         | 3.25799   | 2.79293         | -0.222204   | 0.086345  | 0.359    |
| Megf8_j9         | 29.7263   | 31.2462         | 0.0719429   | 0.43235   | 0.744232 |

|                  |           |            |               |           |           |
|------------------|-----------|------------|---------------|-----------|-----------|
| Atp5sl           | 8.82914   | 8.93846    | 0.0177537     | 0.891464  | 0.965687  |
| B3gnt8_j2        | 0.586755  | 0.269564   | -1.12213      | 0.0432428 | 0.235975  |
| B3gnt8_j1        | 0         | 0.142077   | 1.79769e+308  | 0.0170387 | 1         |
| Exosc5           | 14.3415   | 13.4039    | -0.0975366    | 0.458713  | 0.761199  |
| B9d2             | 4.90852   | 5.46735    | 0.155553      | 0.331538  | 0.673024  |
| Tgfb1            | 1.23132   | 1.75725    | 0.513116      | 0.0225296 | 0.15314   |
| Tgfb1_j2         | 3.71175   | 7.4396     | 1.00313       | 2.44E-05  | 0.000649  |
| BC024978_j1      | 1.26048   | 1.28021    | 0.0224039     | 0.876066  | 0.960645  |
| Numb_l_j1        | 2.15036   | 1.68992    | -0.347622     | 0.316167  | 0.659988  |
| Blvrb            | 29.7988   | 34.0661    | 0.19308       | 0.084863  | 0.355571  |
| Sertad3          | 0.759361  | 0.836614   | 0             | 1         | 1         |
| Sertad1          | 6.82142   | 9.32093    | 0.450401      | 0.0019774 | 0.0247763 |
| Prx              | 10.9046   | 12.2935    | 0             | 1         | 1         |
| Akt2_j1          | 0.0778179 | 0          | -1.79769e+308 | 0.0454578 | 1         |
| Akt2_j8          | 0.117694  | 0.192616   | 0.710684      | 0.277502  | 0.62639   |
| Ttc9b            | 4.3126    | 4.29433    | 0             | 1         | 1         |
| C030039L03Rik_j1 | 0.295729  | 0.190843   | -0.631892     | 0.15423   | 0.487254  |
| Zfp60            | 0.274492  | 0.390812   | 0.509712      | 0.155463  | 0.488557  |
| Gm10046_j2       | 0.858993  | 0.353585   | 0             | 1         | 1         |
| Fbl_j2           | 0.0744065 | 0.0589243  | 0             | 1         | 1         |
| Fbl_j5           | 0.476301  | 0.602327   | 0             | 1         | 1         |
| Lrfn1_j1         | 7.38333   | 7.50954    | 0             | 1         | 1         |
| Lrfn1_j3         | 1.92049   | 1.4872     | 0             | 1         | 1         |
| Fbxo27_j2        | 0.0768766 | 0.0236597  | -1.70011      | 0.269194  | 1         |
| Fbxo27           | 0.15632   | 0.169523   | 0.116979      | 0.865322  | 0.957067  |
| Fbxo27           | 0.321059  | 0.314524   | -0.0296662    | 0.95253   | 0.986299  |
| Fbxo17           | 0.260503  | 0.0147737  | -4.14019      | 0.0539359 | 0.270674  |
| Fbxo17_j4        | 0         | 0.229177   | 1.79769e+308  | 0.0488843 | 0.254686  |
| Fbxo17_j7        | 0.457414  | 5.71E-05   | -12.967       | 0.985379  | 0.995689  |
| Sars2            | 3.31638   | 3.43215    | 0.0495041     | 0.714485  | 0.89656   |
| Sirt2            | 5.70711   | 5.80735    | 0             | 1         | 1         |
| Sirt2            | 43.8611   | 46.3301    | 0             | 1         | 1         |
| Hnrnp_l_j3       | 11.5344   | 11.837     | 0             | 1         | 1         |
| Hnrnp_l_j1       | 22.6647   | 23.0201    | 0             | 1         | 1         |
| Hnrnp_l          | 9.65098   | 11.0486    | 0             | 1         | 1         |
| Hnrnp_l_j5       | 8.46087   | 8.74168    | 0             | 1         | 1         |
| Ech1_j2          | 0.278687  | 0          | -1.79769e+308 | 0.036115  | 0.209831  |
| Ech1_j3          | 0.251607  | 0.272326   | 0.114164      | 0.857946  | 0.954916  |
| Lgals4_j1        | 1.72259   | 1.89406    | 0.136903      | 0.534429  | 0.805586  |
| Lgals7_j1        | 0.134814  | 0.496905   | 1.882         | 0.0857394 | 0.357521  |
| Lgals7           | 0.402761  | 0.488064   | 0.277146      | 0.628936  | 0.855714  |
| Map4k1           | 0.369137  | 0.199568   | -0.887275     | 0.0532193 | 0.268469  |
| Yif1b            | 6.76408   | 5.38745    | -0.328291     | 0.100978  | 0.393552  |
| Yif1b_j2         | 22.1498   | 19.7893    | -0.162572     | 0.222059  | 0.569289  |
| Ppp1r14a         | 0.197232  | 0.241451   | 0.291836      | 0.595692  | 0.83892   |
| Dpf1             | 0.165508  | 0.00717796 | -4.52719      | 0.116747  | 0.424932  |
| Dpf1_j4          | 0.0551047 | 0.0752687  | 0.449876      | 0.701097  | 1         |

|                  |           |           |               |           |           |
|------------------|-----------|-----------|---------------|-----------|-----------|
| Zfp84            | 2.26628   | 2.19388   | -0.046843     | 0.733224  | 0.905831  |
| Zfp30_j2         | 0.391071  | 0         | -1.79769e+308 | 1.73E-05  | 0.0004919 |
| Zfp30_j1         | 0         | 0.153753  | 1.79769e+308  | 0.0017684 | 1         |
| Zfp790           | 1.9605    | 1.80402   | 0             | 1         | 1         |
| Zfp420           | 0.516772  | 0.902234  | 0             | 1         | 1         |
| Zfp420           | 1.13118   | 0.7074    | 0             | 1         | 1         |
| AK155472         | 0.891489  | 0.658284  | -0.437507     | 0.150853  | 0.481595  |
| AK138949_j1      | 0.1275    | 0.178717  | 0.487175      | 0.620197  | 0.850928  |
| Zfp568           | 0.256608  | 0.309376  | 0.269792      | 0.374378  | 0.707086  |
| Zfp260           | 3.24414   | 3.09183   | 0             | 1         | 1         |
| Zfp260_j2        | 7.248     | 7.10065   | 0             | 1         | 1         |
| Zfp382_j2        | 0.787931  | 1.11221   | 0             | 1         | 1         |
| Zfp382           | 2.36682   | 1.60073   | 0             | 1         | 1         |
| Gm5113           | 1.35585   | 1.09775   | 0             | 1         | 1         |
| Gm5113_j1        | 3.18406   | 2.54545   | 0             | 1         | 1         |
| Cox7a1           | 1.88128   | 1.70049   | -0.145758     | 0.541855  | 0.809832  |
| Clip3_j2         | 101.222   | 91.8112   | 0             | 1         | 1         |
| Alkbh6_j2        | 3.57134   | 3.86264   | 0.113121      | 0.741463  | 0.909295  |
| Al428936_j6      | 0.229081  | 0.112405  | -1.02715      | 0.20811   | 0.55225   |
| Al428936_j5      | 0.337878  | 0.343594  | 0.0242025     | 0.963873  | 0.989793  |
| Tyrobp           | 3.42523   | 7.19375   | 1.07054       | 9.14E-09  | 6.45E-07  |
| Nfkbid           | 0.128609  | 0.0960696 | -0.420844     | 0.538723  | 1         |
| Hspb6            | 1.2744    | 1.06377   | 0             | 1         | 1         |
| Tmem149_j2       | 1.45674   | 1.54418   | 0.084095      | 0.758594  | 0.917041  |
| U2af1l4          | 14.8745   | 16.3132   | 0.133198      | 0.363446  | 0.697495  |
| AK049951_j2      | 2.70989   | 3.02806   | 0.160155      | 0.306756  | 0.651982  |
| AK133438_j5      | 0.216088  | 0.124216  | 0             | 1         | 1         |
| XLOC_029648      | 0.190183  | 0.088515  | -1.1034       | 0.212001  | 0.55686   |
| Gm12784_j1       | 0.208247  | 0.0371061 | -2.48857      | 0.190997  | 0.533209  |
| XLOC_029650      | 0.195201  | 0         | -1.79769e+308 | 0.0093338 | 0.0814662 |
| Gm12781_j1       | 0.0382248 | 0.0493947 | 0             | 1         | 1         |
| Pepd             | 13.7742   | 11.0674   | 0             | 1         | 1         |
| Pepd_j1          | 5.42839   | 5.21458   | 0             | 1         | 1         |
| Cebpa            | 1.84015   | 2.15706   | 0.229243      | 0.200874  | 0.544312  |
| Ccdc123_j3       | 0.216148  | 0.242881  | 0.168229      | 0.779574  | 0.925607  |
| Ccdc123          | 1.40434   | 1.61694   | 0.203376      | 0.360713  | 0.695583  |
| Ccdc123_j4       | 0.720814  | 0.805799  | 0.160792      | 0.752504  | 0.914477  |
| Ankrd27          | 11.2376   | 8.82417   | -0.348801     | 0.0013053 | 0.0176932 |
| Ankrd27_j2       | 1.44313   | 2.017     | 0.483014      | 0.0429758 | 0.234987  |
| Tshz3_j4         | 0.983754  | 0.318486  | 0             | 1         | 1         |
| 1600014C10Rik    | 3.35527   | 2.92073   | 0             | 1         | 1         |
| 1600014C10Rik_j1 | 10.0501   | 7.52265   | 0             | 1         | 1         |
| AK034698_j3      | 0.46781   | 0.681018  | 0.54177       | 0.0482672 | 0.252722  |
| AK034698_j2      | 0.261069  | 0.178226  | -0.550724     | 0.261561  | 0.610714  |
| XLOC_029663      | 0.178467  | 0.112943  | -0.660056     | 0.323586  | 0.66661   |
| Zfp619           | 0.106659  | 0.0465647 | -1.1957       | 0.390811  | 1         |
| XLOC_029665      | 0.185924  | 0.100348  | -0.889699     | 0.0172989 | 0.127335  |

|                  |           |                 |            |           |           |
|------------------|-----------|-----------------|------------|-----------|-----------|
| Gm2058           | 8.43007   | 7.8222          | -0.107969  | 0.371274  | 0.70418   |
| Gm6851           | 30.2063   | 34.1718         | 0.177957   | 0.1842    | 0.524784  |
| Vstm2b_j1        | 2.26564   | 1.07029         | -1.08192   | 5.03E-05  | 0.001199  |
| Vstm2b_j4        | 4.85319   | 1.4324          | -1.76049   | 1.15E-07  | 6.05E-06  |
| AK163099         | 0.165285  | 0.12501         | -0.402913  | 0.69828   | 0.888784  |
| AK011498         | 2.2882    | 2.16664         | -0.0787508 | 0.62493   | 0.853601  |
| AK011498_j1      | 0.511489  | 0.281994        | -0.85904   | 0.0358473 | 0.208909  |
| Zfp788_j1        | 0.113329  | 0.0234659       | 0          | 1         | 1         |
| Zfp788           | 0.224999  | 0.308589        | 0          | 1         | 1         |
| Zfp788_j7        | 1.95812   | 0.0369908       | 0          | 1         | 1         |
| Zfp788_j9        | 1.81539   | 3.1161          | 0          | 1         | 1         |
| EU599041         | 0.145543  | 0.0645132       | -1.17378   | 0.232985  | 0.580189  |
| Siglec5_j1       | 0.108877  | 0 -1.79769e+308 |            | 0.0298658 | 1         |
| Lim2_j1          | 0.241595  | 0.27783         | 0.201612   | 0.77819   | 0.925097  |
| Etfb             | 62.3428   | 58.7619         | -0.0853422 | 0.387577  | 0.715306  |
| Zfp658           | 0.357636  | 0.33261         | -0.104658  | 0.780155  | 0.925824  |
| Zfp719           | 0.626271  | 0.590822        | -0.0840655 | 0.739755  | 0.90873   |
| Zfp719_j2        | 1.72981   | 1.7578          | 0.0231625  | 0.898979  | 0.967647  |
| Ctu1             | 1.40171   | 1.67704         | 0.258722   | 0.259545  | 0.60834   |
| Klk8_j1          | 0.494958  | 0.336195        | -0.558009  | 0.334347  | 0.675193  |
| Klk5_j3          | 0.890688  | 0.29581         | -1.59025   | 0.0119073 | 0.0976159 |
| 2410002F23Rik_j1 | 0.771052  | 0.526185        | 0          | 1         | 1         |
| 2410002F23Rik_j3 | 0.297808  | 0.727375        | 0          | 1         | 1         |
| Syt3             | 6.67514   | 3.9161          | 0          | 1         | 1         |
| Syt3_j2          | 3.58639   | 1.59918         | 0          | 1         | 1         |
| Syt3_j5          | 1.24354   | 0               | 0          | 1         | 1         |
| Lrrc4b_j1        | 4.40526   | 3.96213         | -0.152951  | 0.332679  | 0.67386   |
| Lrrc4b           | 1.42702   | 1.93073         | 0.436144   | 0.0432527 | 0.235994  |
| Aspdh_j4         | 0.156727  | 0.140658        | -0.156065  | 0.747585  | 0.912113  |
| Josd2_j3         | 3.05121   | 2.37909         | -0.358973  | 0.523947  | 0.799625  |
| Josd2_j4         | 7.7214    | 8.32498         | 0.108584   | 0.503725  | 0.78721   |
| AK017368         | 0.105825  | 0.0259057       | -2.03034   | 0.270635  | 1         |
| Napsa            | 0.181502  | 0.215835        | 0.249945   | 0.728053  | 0.903627  |
| Napsa_j1         | 0.0649322 | 0.10945         | 0.753261   | 0.609068  | 1         |
| XLOC_029699      | 0.118551  | 0.0809426       | -0.550538  | 0.390731  | 1         |
| Vrk3             | 11.3839   | 12.6836         | 0.155977   | 0.171998  | 0.509127  |
| Nup62            | 0.990496  | 1.09191         | 0          | 1         | 1         |
| Pnkp             | 1.62202   | 1.95965         | 0          | 1         | 1         |
| Fuz_j1           | 0.529202  | 0.471119        | 0          | 1         | 1         |
| Irf3_j1          | 4.44803   | 4.47765         | 0          | 1         | 1         |
| Irf3_j4          | 0.736947  | 1.98404         | 0          | 1         | 1         |
| Rras_j1          | 28.3534   | 37.5124         | 0.403847   | 0.0001253 | 0.0025888 |
| Nosip            | 9.41719   | 9.67135         | 0          | 1         | 1         |
| Pih1d1           | 11.9513   | 13.0078         | 0          | 1         | 1         |
| Pih1d1_j2        | 3.36002   | 4.7755          | 0          | 1         | 1         |
| Slc17a7          | 105.843   | 73.7772         | -0.52068   | 1.63E-09  | 1.32E-07  |
| Tead2            | 0.231159  | 0.0615787       | -1.90838   | 0.0284802 | 0.17949   |

|              |           |                 |            |           |           |
|--------------|-----------|-----------------|------------|-----------|-----------|
| Tead2        | 0.0849188 | 0.131437        | 0.630217   | 0.364164  | 1         |
| XLOC_029715  | 0.300757  | 0.0770846       | -1.96408   | 0.303643  | 0.649263  |
| Rpl14-ps1    | 124.856   | 142.637         | 0          | 1         | 1         |
| Gys1         | 17.7921   | 17.9256         | 0          | 1         | 1         |
| Tulp2_j1     | 0.191298  | 0.197464        | 0          | 1         | 1         |
| Plekha4_j2   | 4.98668   | 4.52201         | 0          | 1         | 1         |
| Hsd17b14_j1  | 0.143592  | 0 -1.79769e+308 | 0.0006852  | 0.0105426 |           |
| Hsd17b14_j7  | 0.428607  | 0.229973        | -0.89819   | 0.301621  | 0.647961  |
| Hsd17b14_j10 | 0.642436  | 0.33127         | -0.955548  | 0.121612  | 0.434204  |
| Bcat2        | 10.4895   | 12.6992         | 0          | 1         | 1         |
| Rasip1_j6    | 0.300014  | 0.0419861       | -2.83705   | 0.0455494 | 0.244268  |
| Ntn5_j2      | 0.275368  | 0.312336        | 0.181737   | 0.74686   | 0.911804  |
| Ntn5_j3      | 0.126764  | 0 -1.79769e+308 | 0.0193573  |           | 1         |
| Car11_j4     | 5.67986   | 4.89372         | 0          | 1         | 1         |
| Car11_j5     | 1.329     | 1.56237         | 0          | 1         | 1         |
| Lmtk3_j6     | 0         | 0.12798         | 0          | 1         | 1         |
| AK133391_j3  | 0.985879  | 1.08432         | 0.137307   | 0.611354  | 0.846879  |
| Kdelr1       | 4.42984   | 4.53036         | 0          | 1         | 1         |
| Tmem143      | 0.787223  | 1.6871          | 0          | 1         | 1         |
| Ccdc114_j1   | 0.10003   | 0.108655        | 0.119314   | 0.878944  | 1         |
| Ccdc114_j4   | 0.165329  | 0.168199        | 0.0248349  | 0.967677  | 0.990878  |
| Nomo1        | 29.8661   | 28.7435         | -0.0552742 | 0.533867  | 0.805306  |
| Nomo1_j1     | 0.44218   | 0.29147         | -0.601287  | 0.174697  | 0.512897  |
| Kcnc1        | 1.62115   | 0.665682        | 0          | 1         | 1         |
| Kcnc1        | 5.38077   | 3.40164         | 0          | 1         | 1         |
| Gtf2h1       | 9.26933   | 9.43832         | 0.0260652  | 0.812045  | 0.938348  |
| Ldha         | 35.2426   | 31.6836         | 0          | 1         | 1         |
| Ldha_j2      | 1.32435   | 0.969339        | 0          | 1         | 1         |
| Tmem86a      | 1.08053   | 0.980753        | -0.139779  | 0.650701  | 0.865956  |
| XLOC_029740  | 0.156933  | 0.109159        | -0.523718  | 0.496797  | 0.783596  |
| XLOC_029742  | 0.171029  | 0.201463        | 0.236276   | 0.513272  | 0.792548  |
| XLOC_029742  | 0.141354  | 4.65E-06        | -14.8922   | 0.988399  | 0.996486  |
| Zdhhc13      | 12.4971   | 11.3216         | -0.14252   | 0.232506  | 0.579559  |
| Nav2_j2      | 0.433298  | 0.25111         | -0.787038  | 0.0047744 | 0.0490203 |
| Nav2_j10     | 0.588035  | 0.468481        | -0.327911  | 0.273407  | 0.622536  |
| Nav2_j14     | 1.08079   | 0.778064        | -0.474127  | 0.0989182 | 0.389007  |
| Nav2_j15     | 1.59594   | 2.36313         | 0.566292   | 0.004051  | 0.0433082 |
| Htatip2      | 8.50457   | 9.99551         | 0          | 1         | 1         |
| Htatip2      | 0.207627  | 0.286399        | 0          | 1         | 1         |
| Htatip2      | 6.20718   | 5.58616         | 0          | 1         | 1         |
| Htatip2      | 16.0183   | 17.4302         | 0          | 1         | 1         |
| Prmt3        | 2.21524   | 2.30007         | 0.0542163  | 0.718024  | 0.898457  |
| Prmt3_j2     | 1.93857   | 2.35741         | 0.282208   | 0.338672  | 0.678961  |
| Nell1_j1     | 0.328735  | 0.147225        | -1.1589    | 0.0378864 | 0.216078  |
| Nell1        | 0.885227  | 0.778583        | -0.185198  | 0.423579  | 0.739059  |
| Ano5_j1      | 0.513482  | 0.284874        | -0.84999   | 0.0018698 | 0.0236786 |
| Slc17a6      | 23.8955   | 20.7634         | 0          | 1         | 1         |

|             |           |                 |            |           |           |
|-------------|-----------|-----------------|------------|-----------|-----------|
| Slc17a6_j3  | 5.28033   | 12.2421         | 0          | 1         | 1         |
| Slc17a6_j4  | 27.3281   | 26.8853         | 0          | 1         | 1         |
| Gas2        | 1.03354   | 1.20458         | 0.220939   | 0.257558  | 0.606306  |
| Gm6181      | 18.641    | 19.0789         | 0.0335036  | 0.828528  | 0.944579  |
| XLOC_029755 | 0.0983263 | 0.0455801       | -1.10917   | 0.277572  | 1         |
| Luzp2       | 4.36836   | 3.47711         | 0          | 1         | 1         |
| Tubgcp5     | 6.98573   | 6.06121         | -0.204805  | 0.0735739 | 0.326919  |
| Cyfp1       | 6.39731   | 6.01325         | -0.0893209 | 0.366054  | 0.700001  |
| Herc2       | 1.672     | 1.46198         | 0          | 1         | 1         |
| Herc2_j3    | 13.7289   | 12.672          | 0          | 1         | 1         |
| Herc2_j4    | 14.0544   | 14.3791         | 0          | 1         | 1         |
| Gabrb3      | 9.20778   | 6.80555         | 0          | 1         | 1         |
| Gabrb3_j1   | 1.43243   | 4.70533         | 0          | 1         | 1         |
| Atp10a      | 0.284556  | 0.303575        | 0.0933382  | 0.779443  | 0.925607  |
| Ube3a_j5    | 0.299735  | 0 -1.79769e+308 |            | 1.64E-05  | 0.0004723 |
| Ndn         | 107.572   | 113.66          | 0.079421   | 0.355549  | 0.691525  |
| Otud7a_j2   | 1.86812   | 1.19787         | -0.641118  | 0.0228556 | 0.154465  |
| Otud7a_j1   | 6.98464   | 6.0655          | -0.203559  | 0.136081  | 0.458967  |
| XLOC_029771 | 0.591848  | 0.32614         | -0.859735  | 0.168309  | 0.504956  |
| XLOC_029771 | 0.305841  | 0.194693        | -0.651577  | 0.176854  | 0.515889  |
| Mtmr10      | 1.40461   | 1.68521         | 0          | 1         | 1         |
| Mtmr10_j3   | 1.16567   | 1.65692         | 0          | 1         | 1         |
| Mcee        | 3.65943   | 3.45639         | -0.0823508 | 0.740433  | 0.909073  |
| Apba2       | 8.16636   | 13.6273         | 0          | 1         | 1         |
| Apba2_j2    | 10.4494   | 12.4312         | 0          | 1         | 1         |
| Apba2_j10   | 0.0997937 | 0               | 0          | 1         | 1         |
| Tarsl2      | 3.53045   | 3.16849         | 0          | 1         | 1         |
| Tm2d3       | 19.187    | 19.012          | -0.0132159 | 0.91852   | 0.974658  |
| Pcsk6       | 0.294436  | 0.0916849       | -1.6832    | 0.010448  | 0.0883127 |
| Pcsk6_j1    | 0.136614  | 0 -1.79769e+308 |            | 4.89E-05  | 1         |
| Pcsk6       | 0.326379  | 0.347132        | 0.0889345  | 0.807688  | 0.936668  |
| Snrpa1      | 8.34704   | 9.20127         | 0.140568   | 0.345595  | 0.684965  |
| H47         | 16.5649   | 16.268          | -0.0260961 | 0.823838  | 0.943114  |
| Chsy1       | 1.90726   | 1.3281          | 0          | 1         | 1         |
| Lins        | 1.35913   | 1.71717         | 0          | 1         | 1         |
| Lins2_j2    | 0.697767  | 0.585989        | 0          | 1         | 1         |
| Adamts17_j2 | 0.384232  | 0.32626         | -0.235958  | 0.669265  | 0.874813  |
| Adamts17    | 0.352182  | 0.372125        | 0.0794649  | 0.734065  | 0.90626   |
| Lysmd4_j1   | 3.1672    | 4.26286         | 0.428611   | 0.0038376 | 0.0416583 |
| Lysmd4_j2   | 3.00316   | 3.2019          | 0.0924467  | 0.720866  | 0.900117  |
| Ttc23       | 0.137526  | 0.0308119       | 0          | 1         | 1         |
| Igf1r       | 1.99748   | 1.77106         | -0.173564  | 0.174231  | 0.512193  |
| Fam169b_j2  | 0.262124  | 0.0361443       | -2.85841   | 0.0159841 | 0.120329  |
| BC070425_j1 | 0.231139  | 0.128206        | -0.8503    | 0.242682  | 0.590089  |
| BC070425_j8 | 0.052926  | 0 -1.79769e+308 |            | 0.0547633 | 1         |
| Rgma        | 0.977577  | 0.799964        | 0          | 1         | 1         |
| Rgma        | 2.06544   | 2.02251         | 0          | 1         | 1         |

|             |           |            |            |           |          |
|-------------|-----------|------------|------------|-----------|----------|
| Fam174b     | 5.76674   | 5.93594    | 0.0417193  | 0.743316  | 0.910262 |
| Akap13_j1   | 0.663014  | 0.637079   | -0.0575666 | 0.754558  | 0.915367 |
| Klhl25      | 2.54518   | 1.83401    | 0          | 1         | 1        |
| Klhl25_j2   | 0.110481  | 0          | 0          | 1         | 1        |
| Agbl1_j1    | 0.364338  | 0.212918   | -0.774982  | 0.105021  | 0.402326 |
| Gm9885      | 1.23252   | 1.1349     | 0          | 1         | 1        |
| Mrps11      | 4.69124   | 4.2892     | -0.129259  | 0.487348  | 0.778291 |
| Aen         | 3.37285   | 4.2291     | 0          | 1         | 1        |
| Aen         | 1.60866   | 2.59298    | 0          | 1         | 1        |
| Aen         | 5.95808   | 6.18982    | 0          | 1         | 1        |
| Abhd2       | 21.7003   | 18.9985    | 0          | 1         | 1        |
| Abhd2_j1    | 0.108685  | 0.0499169  | 0          | 1         | 1        |
| Zfp710      | 0.189674  | 0.138836   | -0.45014   | 0.552716  | 0.816696 |
| Zfp710      | 0.344639  | 0.239679   | -0.523978  | 0.378162  | 0.709762 |
| XLOC_029814 | 0.151044  | 0.10417    | -0.536034  | 0.417991  | 0.734998 |
| Sema4b      | 4.22775   | 3.2417     | -0.383142  | 0.016973  | 0.1256   |
| Ttll13_j4   | 0.0967884 | 0.0225269  | 0          | 1         | 1        |
| Ngrn        | 5.15093   | 4.90748    | 0          | 1         | 1        |
| Ngrn        | 11.227    | 12.1111    | 0          | 1         | 1        |
| Vps33b      | 4.25418   | 3.6587     | -0.217548  | 0.161768  | 0.496761 |
| Vps33b_j2   | 0.783873  | 0.9924     | 0.340302   | 0.53357   | 0.805214 |
| Gm17257     | 28.9054   | 28.5497    | -0.0178631 | 0.896777  | 0.967071 |
| Zscan2_j2   | 0.268382  | 0.208795   | 0          | 1         | 1        |
| Zscan2_j1   | 0.477892  | 0.422121   | 0          | 1         | 1        |
| Zscan2_j3   | 0.267677  | 0.561248   | 0          | 1         | 1        |
| Zfp592      | 4.1913    | 2.2237     | 0          | 1         | 1        |
| Pde8a       | 2.84225   | 3.1662     | 0.155722   | 0.290755  | 0.638092 |
| AK013794_j3 | 0.186122  | 0.180044   | -0.0479044 | 0.96068   | 0.988891 |
| AK013794_j2 | 0.366044  | 0.140288   | -1.38363   | 0.180287  | 0.519928 |
| AK013794_j6 | 0.409355  | 0.283471   | -0.530147  | 0.621145  | 0.85151  |
| AK013794_j7 | 0.0521734 | 0.0624741  | 0.259942   | 0.919969  | 1        |
| Whamm_j1    | 1.43309   | 0.875916   | -0.710261  | 0.0160608 | 0.120701 |
| Whamm       | 1.17193   | 1.15055    | -0.0265633 | 0.891632  | 0.965687 |
| Fam103a1_j1 | 0.458695  | 0.348638   | -0.395806  | 0.485029  | 0.776871 |
| Tm6sf1      | 2.78062   | 2.10963    | 0          | 1         | 1        |
| Sh3gl3      | 1.37364   | 1.46646    | 0.0943387  | 0.745183  | 0.91124  |
| Sh3gl3_j2   | 0.294428  | 0.056842   | -2.37289   | 0.0727453 | 0.324527 |
| Eftud1      | 0.627365  | 1.15012    | 0          | 1         | 1        |
| Mex3b       | 2.15832   | 2.292      | 0.0866956  | 0.634696  | 0.858242 |
| Tmc3_j2     | 0.0818215 | 0.0793539  | 0          | 1         | 1        |
| Stard5      | 1.3253    | 1.35754    | 0.0346735  | 0.851943  | 0.952976 |
| Mesdc2_j2   | 1.92479   | 2.88294    | 0          | 1         | 1        |
| Mesdc2_j1   | 3.75133   | 4.39559    | 0          | 1         | 1        |
| Mesdc2_j3   | 5.42398   | 5.73114    | 0          | 1         | 1        |
| AK199694    | 2.82357   | 1.84226    | 0          | 1         | 1        |
| Nox4        | 0.169977  | 0.00826635 | -4.36195   | 0.0486737 | 0.254145 |
| Nox4        | 0.142603  | 0.189076   | 0.406962   | 0.469486  | 0.767555 |



|             |            |           |            |           |           |
|-------------|------------|-----------|------------|-----------|-----------|
| Nox4_j2     | 0.114261   | 0.250072  | 1.13002    | 0.0614348 | 0.292778  |
| Ctsc        | 4.56462    | 6.13058   | 0.425529   | 0.0027194 | 0.0319231 |
| Ctsc_j2     | 1.20747    | 1.46189   | 0.275844   | 0.422964  | 0.738638  |
| Rab38       | 0.613108   | 0.541734  | -0.178558  | 0.547591  | 0.813768  |
| Fzd4        | 1.39761    | 1.27419   | -0.133377  | 0.386548  | 0.714571  |
| Me3         | 0.536928   | 0.202306  | -1.40819   | 0.0043551 | 0.0457866 |
| XLOC_029853 | 0.163619   | 0.0911132 | -0.844611  | 0.3945    | 0.719811  |
| Sytl2       | 23.7945    | 23.0601   | 0          | 1         | 1         |
| Ccdc89      | 0.271666   | 0.261791  | -0.0534183 | 0.887023  | 0.964106  |
| BC051589    | 3.52074    | 2.71531   | 0          | 1         | 1         |
| Dlg2_j3     | 3.70454    | 3.69649   | 0          | 1         | 1         |
| Ccdc90b     | 3.22664    | 3.32251   | 0.0422391  | 0.759249  | 0.917118  |
| Rab30       | 3.63604    | 3.21329   | -0.178317  | 0.106943  | 0.406334  |
| Rab30_j1    | 0.186664   | 0.216597  | 0.21457    | 0.557428  | 0.819674  |
| Rab30_j2    | 0.602136   | 0.163826  | -1.87793   | 1.50E-07  | 7.67E-06  |
| Prcp        | 2.15997    | 1.95755   | 0          | 1         | 1         |
| Prcp_j2     | 5.77084    | 5.98303   | 0          | 1         | 1         |
| Fam181b     | 8.29841    | 8.10485   | -0.0340488 | 0.793479  | 0.931169  |
| XLOC_029867 | 0.147692   | 0.17963   | 0.282441   | 0.591148  | 0.836876  |
| Odz4_j6     | 0.480916   | 0.173625  | -1.46981   | 1.10E-06  | 4.45E-05  |
| Nars2_j1    | 2.41067    | 2.3343    | -0.0464458 | 0.815642  | 0.940008  |
| Nars2       | 1.45067    | 1.14073   | -0.346764  | 0.110819  | 0.414341  |
| Gab2        | 3.02205    | 2.67024   | 0          | 1         | 1         |
| Gab2        | 0.943456   | 0.991161  | 0          | 1         | 1         |
| Kctd21      | 0.124328   | 0.335374  | 0          | 1         | 1         |
| Kctd21_j2   | 0.356737   | 0.517254  | 0          | 1         | 1         |
| Alg8        | 1.64519    | 1.35436   | -0.280646  | 0.281979  | 0.630502  |
| Ndufc2      | 96.7782    | 82.2815   | -0.234114  | 0.0156386 | 0.118265  |
| Ints4_j5    | 1.61424    | 2.41667   | 0.582165   | 0.0072387 | 0.0675736 |
| Rsf1        | 0.420601   | 0.383213  | -0.134305  | 0.570831  | 0.826488  |
| Clns1a      | 21.3522    | 21.8876   | 0.0357247  | 0.734969  | 0.906576  |
| Pak1        | 15.6925    | 13.9965   | -0.165003  | 0.182865  | 0.523288  |
| Pak1_j3     | 18.9492    | 17.8402   | -0.0870056 | 0.444361  | 0.752081  |
| Prkrir      | 3.73214    | 2.97675   | 0          | 1         | 1         |
| Prkrir_j1   | 0.239319   | 0.0811587 | 0          | 1         | 1         |
| XLOC_029881 | 0.183444   | 0.063386  | -1.5331    | 0.220279  | 0.567083  |
| Wnt11_j2    | 0.00242335 | 0.047059  | 4.2794     | 0.363959  | 1         |
| Wnt11_j1    | 0.303185   | 0.232972  | -0.380041  | 0.38794   | 0.715462  |
| Mtap6       | 30.0962    | 36.555    | 0          | 1         | 1         |
| Mtap6       | 23.822     | 26.8325   | 0          | 1         | 1         |
| Mtap6_j1    | 33.2806    | 49.5754   | 0          | 1         | 1         |
| Gdpd5       | 5.88956    | 6.4592    | 0.133197   | 0.300671  | 0.647263  |
| Gdpd5_j4    | 0.305275   | 0.326178  | 0.09555    | 0.898023  | 0.967557  |
| Gdpd5_j5    | 3.25324    | 2.50541   | -0.376826  | 0.306843  | 0.652022  |
| Klhl35_j1   | 0.102111   | 0.120799  | 0.242466   | 0.794741  | 1         |
| Arrb1_j1    | 13.1899    | 15.5346   | 0          | 1         | 1         |
| Lipt2       | 2.02448    | 2.08567   | 0.0429602  | 0.832605  | 0.945929  |

|                  |           |                 |            |           |           |
|------------------|-----------|-----------------|------------|-----------|-----------|
| Kcne3            | 0.37441   | 0.180924        | -1.04924   | 0.153669  | 0.486379  |
| Pgm2l1           | 0.0590479 | 0.15281         | 0          | 1         | 1         |
| P4ha3            | 5.98328   | 6.08877         | 0.0252139  | 0.849465  | 0.952228  |
| C2cd3            | 1.24631   | 0.691037        | 0          | 1         | 1         |
| C2cd3_j3         | 0.233141  | 0.107596        | 0          | 1         | 1         |
| Ucp2_j2          | 0.116493  | 0.0349283       | -1.73777   | 0.360912  | 1         |
| Chchd8           | 3.77515   | 4.83963         | 0.358365   | 0.0939355 | 0.377641  |
| Fam168a          | 0.588535  | 0.484518        | -0.280578  | 0.286809  | 0.635459  |
| Fam168a          | 3.1497    | 2.15873         | -0.545031  | 0.0001197 | 0.0024982 |
| Fchsd2           | 5.48174   | 4.60338         | 0          | 1         | 1         |
| Fchsd2           | 3.37634   | 2.64826         | 0          | 1         | 1         |
| Stard10          | 61.6653   | 66.5151         | 0.109221   | 0.22763   | 0.574755  |
| Arap1            | 12.0535   | 15.4849         | 0.361414   | 0.0005561 | 0.0089141 |
| Pde2a_j1         | 9.17476   | 9.72695         | 0.0843169  | 0.464376  | 0.764686  |
| Clpb             | 4.44936   | 4.26624         | 0          | 1         | 1         |
| Clpb             | 3.04092   | 2.67017         | 0          | 1         | 1         |
| 2400001E08Rik    | 0.469199  | 0.436212        | -0.10517   | 0.683073  | 0.881314  |
| 2400001E08Rik_j3 | 0.207279  | 0.0846391       | -1.29218   | 0.355796  | 0.691678  |
| Numa1_j3         | 3.09946   | 3.1181          | 0          | 1         | 1         |
| Numa1_j5         | 4.02646   | 3.56173         | 0          | 1         | 1         |
| Pgap2_j2         | 0.935527  | 0.671464        | 0          | 1         | 1         |
| Pgap2_j4         | 2.35513   | 2.51765         | 0          | 1         | 1         |
| Pgap2_j5         | 1.41384   | 0.912238        | 0          | 1         | 1         |
| Stim1            | 6.70006   | 5.65677         | 0          | 1         | 1         |
| Stim1_j3         | 2.14239   | 2.72971         | 0          | 1         | 1         |
| Rrm1             | 0.720474  | 0.696454        | -0.0489182 | 0.843367  | 0.950448  |
| Rrm1_j1          | 2.11097   | 2.20477         | 0.062718   | 0.696303  | 0.888054  |
| Trim6            | 0.244608  | 0.14192         | -0.785393  | 0.183406  | 0.524055  |
| Trim34a_j3       | 0.244758  | 0.235096        | -0.0581104 | 0.949605  | 0.985371  |
| Trim34           | 0.371008  | 0.323245        | -0.198823  | 0.64753   | 0.864172  |
| Gm4887           | 5.09843   | 5.15406         | 0.0156566  | 0.925535  | 0.976854  |
| Cckbr            | 3.6643    | 14.7828         | 2.01231    | 0         | 0         |
| Smpd1            | 15.3116   | 16.967          | 0          | 1         | 1         |
| Fxc1_j3          | 6.87101   | 7.39202         | 0          | 1         | 1         |
| Dnhd1_j1         | 0.0728902 | 0.0902988       | 0.308982   | 0.747343  | 1         |
| Dnhd1_j1         | 0.157555  | 0.0464582       | -1.76185   | 0.0108617 | 0.0909102 |
| Ilk              | 19.3123   | 20.5977         | 0          | 1         | 1         |
| Syt9             | 13.4028   | 12.4652         | 0          | 1         | 1         |
| Syt9_j2          | 16.0321   | 14.5656         | 0          | 1         | 1         |
| Syt9_j4          | 12.8401   | 13.7511         | 0          | 1         | 1         |
| Olfml1_j1        | 0.164133  | 0.395845        | 1.27007    | 0.013304  | 0.105757  |
| Olfml1           | 1.99116   | 1.73077         | -0.202191  | 0.267713  | 0.616423  |
| Ppfibp2_j2       | 0.685645  | 0.810324        | 0.241037   | 0.38097   | 0.711636  |
| Ppfibp2_j5       | 0.113472  | 0 -1.79769e+308 |            | 0.0014104 | 1         |
| Ppfibp2_j6       | 0.16724   | 0 -1.79769e+308 |            | 0.0001068 | 0.0022786 |
| Gm10156          | 24.8454   | 24.419          | -0.0249744 | 0.8254    | 0.943703  |
| Eif3f            | 97.9095   | 96.4378         | -0.0218503 | 0.805209  | 0.935575  |

|                  |           |                       |            |           |           |
|------------------|-----------|-----------------------|------------|-----------|-----------|
| AK007082_j1      | 0.0399724 | 0.0633106             | 0          | 1         | 1         |
| D930014E17Rik    | 4.84938   | 6.20224               | 0.354987   | 0.0421583 | 0.232049  |
| Ipo7_j1          | 2.02237   | 1.85504               | 0          | 1         | 1         |
| Ipo7             | 14.4911   | 14.0124               | 0          | 1         | 1         |
| Zfp143           | 1.60046   | 1.24921               | 0          | 1         | 1         |
| Zfp143           | 0.672619  | 1.03006               | 0          | 1         | 1         |
| Zfp143_j1        | 0.175023  | 3.62E-05              | 0          | 1         | 1         |
| Wee1             | 2.05721   | 1.24931               | -0.719562  | 0.000854  | 0.0125993 |
| Swap70           | 1.38408   | 1.41177               | 0.028579   | 0.886559  | 0.964031  |
| Swap70_j2        | 1.1206    | 1.38192               | 0.302407   | 0.229821  | 0.576909  |
| Adm_j1           | 0.329032  | 0.289002              | -0.187151  | 0.770373  | 0.921825  |
| Adm              | 0.317981  | 0.408484              | 0.361339   | 0.484885  | 0.776776  |
| Ampd3_j4         | 0.197629  | 0                     | 0          | 1         | 1         |
| Ctr9             | 10.8434   | 10.0502               | -0.109595  | 0.278791  | 0.627636  |
| Usp47_j1         | 2.44675   | 2.37058               | -0.0456239 | 0.761613  | 0.917949  |
| Usp47            | 8.88294   | 9.51364               | 0.0989592  | 0.354888  | 0.690914  |
| Mical2_j4        | 3.16062   | 3.08944               | -0.0328643 | 0.844643  | 0.950852  |
| Mical2_j3        | 2.17723   | 2.37819               | 0.127367   | 0.489324  | 0.779561  |
| Mical2_j1        | 0.306188  | 0 -1.79769e+308       |            | 7.05E-09  | 5.07E-07  |
| Mical2_j2        | 0.424995  | 0.800369              | 0.913221   | 0.0050427 | 0.0510331 |
| Parva            | 17.1191   | 15.3699               | 0          | 1         | 1         |
| Tead1            | 0.327805  | 0.198412              | -0.724335  | 0.0398813 | 0.223402  |
| Tead1            | 0.514061  | 0.51798               | 0.0109568  | 0.964623  | 0.989999  |
| Rassf10          | 1.11655   | 1.16183               | 0.0573494  | 0.759152  | 0.917068  |
| Arntl_j2         | 0.345858  | 0 -1.79769e+308       |            | 2.02E-08  | 1.33E-06  |
| Arntl            | 0.740751  | 1.1196                | 0.59592    | 0.0245622 | 0.162357  |
| Far1             | 11.1701   | 10.8265               | 0          | 1         | 1         |
| Far1_j2          | 12.8475   | 12.7313               | 0          | 1         | 1         |
| Spon1            | 3.96106   | 3.53247               | -0.165206  | 0.182457  | 0.522899  |
| Pde3b            | 3.37613   | 3.44182               | 0.0278044  | 0.842461  | 0.95025   |
| Pde3b_j2         | 1.58409   | 1.69368               | 0.0965081  | 0.649773  | 0.865482  |
| 1110004F10Rik_j1 | 25.9171   | 32.3257               | 0.318776   | 0.0683115 | 0.312941  |
| 1110004F10Rik_j2 | 4.17561   | 0.513692              | -3.02301   | 0.0003803 | 0.006507  |
| 1110004F10Rik    | 9.94138   | 11.8457               | 0.25285    | 0.0972638 | 0.385499  |
| Nucb2            | 3.78245   | 3.88541               | 0.038746   | 0.824457  | 0.943295  |
| Nucb2_j1         | 0.640674  | 0.585302              | -0.130411  | 0.777155  | 0.924662  |
| AK045786_j3      | 1.20442   | 0.650022              | -0.889778  | 0.102424  | 0.396457  |
| AK045786_j4      | 0.479172  | 0.543521              | 0.181792   | 0.809187  | 0.937411  |
| Tmc5             | 0.346893  | 0.536422              | 0.628877   | 0.0492333 | 0.255794  |
| 6330503K22Rik_j1 | 0.132801  | 0 -1.79769e+308       |            | 0.0002822 | 1         |
| 6330503K22Rik_j2 | 3.94109   | 4.91698               | 0.319179   | 0.0358929 | 0.20902   |
| 9030624J02Rik    | 3.34029   | 3.02221               | 0          | 1         | 1         |
| 9030624J02Rik_j2 | 0.12798   | 0                     | 0          | 1         | 1         |
| Gm5601           | 19.7329   | 18.9333               | -0.0596731 | 0.625872  | 0.854009  |
| Acsm3_j1         | 0         | 0.615893 1.79769e+308 |            | 0.0007515 | 0.0113916 |
| Tmem159          | 8.69072   | 18.9225               | 1.12255    | 0         | 0         |
| Uqcrc2           | 16.6424   | 14.998                | -0.1501    | 0.212752  | 0.557725  |

|                  |           |                 |              |           |           |
|------------------|-----------|-----------------|--------------|-----------|-----------|
| Uqcr2_j1         | 76.5126   | 70.953          | -0.108833    | 0.232465  | 0.579515  |
| BC030336         | 10.7966   | 8.85977         | -0.285233    | 0.0061235 | 0.0595351 |
| Vwa3a_j1         | 0.0749696 | 0.0404452       | -0.890338    | 0.634597  | 1         |
| Vwa3a_j4         | 0.0755853 | 0 -1.79769e+308 |              | 0.121262  | 1         |
| Eef2k            | 2.84542   | 4.0476          | 0            | 1         | 1         |
| Eef2k_j3         | 2.22749   | 1.49123         | 0            | 1         | 1         |
| Polr3e_j1        | 4.2982    | 4.55773         | 0            | 1         | 1         |
| Polr3e_j4        | 0.530039  | 0.588029        | 0            | 1         | 1         |
| Mettl9_j1        | 1.76862   | 2.34072         | 0.404325     | 0.054921  | 0.273309  |
| Mettl9           | 2.37588   | 2.13116         | -0.156824    | 0.452586  | 0.757663  |
| Otoa_j1          | 0.508647  | 0.376605        | -0.433612    | 0.314954  | 0.659055  |
| Hs3st2           | 8.32645   | 4.10098         | 0            | 1         | 1         |
| Ubfd1            | 8.47972   | 6.98951         | 0            | 1         | 1         |
| XLOC_029981      | 0.22298   | 0.162768        | 0            | 1         | 1         |
| Dctn5            | 61.3371   | 61.3137         | -0.000551533 | 0.99547   | 0.998731  |
| Plk1_j6          | 0.0515289 | 0.035776        | -0.526391    | 0.693276  | 1         |
| 2010110P09Rik    | 10.7622   | 9.35256         | 0            | 1         | 1         |
| 2010110P09Rik_j4 | 3.10686   | 2.29157         | 0            | 1         | 1         |
| Prkcb_j1         | 0.177471  | 0 -1.79769e+308 |              | 0.0019658 | 0.0246565 |
| Prkcb            | 23.8271   | 19.661          | -0.277269    | 0.0046162 | 0.0478097 |
| Cacng3           | 0.615378  | 0.544173        | -0.177406    | 0.528171  | 0.801996  |
| Rbbp6            | 8.56156   | 7.97478         | 0            | 1         | 1         |
| Rbbp6            | 1.2863    | 1.1813          | 0            | 1         | 1         |
| Rbbp6_j2         | 0.554384  | 0               | 0            | 1         | 1         |
| Rbbp6_j4         | 0.671803  | 0.330902        | 0            | 1         | 1         |
| Tnrc6a           | 1.54636   | 1.01212         | 0            | 1         | 1         |
| Tnrc6a_j1        | 3.07786   | 3.18698         | 0            | 1         | 1         |
| Tnrc6a_j6        | 0.0856465 | 0.0894814       | 0            | 1         | 1         |
| Slc5a11_j2       | 0.0737755 | 0.0929963       | 0            | 1         | 1         |
| Slc5a11_j8       | 0.0859666 | 0               | 0            | 1         | 1         |
| Slc5a11_j12      | 0.128428  | 0.0510907       | 0            | 1         | 1         |
| Lcmt1            | 28.997    | 28.6403         | -0.0178576   | 0.863339  | 0.956634  |
| XLOC_029992      | 0.257121  | 0.0552967       | -2.21718     | 0.212374  | 0.557374  |
| Jmjd5_j3         | 1.14702   | 0.55962         | 0            | 1         | 1         |
| Il4ra            | 4.85062   | 7.49807         | 0            | 1         | 1         |
| Sbk1_j1          | 5.66864   | 4.07204         | 0            | 1         | 1         |
| Sbk1             | 5.03496   | 5.47042         | 0            | 1         | 1         |
| Sbk1_j2          | 8.8028    | 10.0449         | 0            | 1         | 1         |
| Tufm_j1          | 0.115541  | 0.0718408       | -0.685529    | 0.426131  | 1         |
| Apob48r_j3       | 0.0536649 | 0.126201        | 1.23368      | 0.203281  | 1         |
| Gdpd3_j3         | 3.50032   | 1.41124         | -1.31052     | 1.71E-08  | 1.14E-06  |
| Gdpd3_j4         | 1.56831   | 2.00566         | 0.354869     | 0.108863  | 0.410491  |
| Ypel3            | 58.9536   | 53.3202         | -0.144896    | 0.165823  | 0.502443  |
| Fam57b           | 17.7842   | 13.0413         | -0.447508    | 3.00E-06  | 0.0001089 |
| Fam57b           | 102.664   | 81.6903         | -0.329697    | 0.0001992 | 0.0038249 |
| Sez6l2_j1        | 0.997991  | 1.87905         | 0            | 1         | 1         |
| Sez6l2_j5        | 2.94698   | 4.69895         | 0            | 1         | 1         |

|             |           |                        |             |           |           |
|-------------|-----------|------------------------|-------------|-----------|-----------|
| Cdipt       | 27.1276   | 28.4258                | 0.0674387   | 0.462903  | 0.763401  |
| Cdipt_j1    | 43.3351   | 43.9142                | 0.0191485   | 0.870297  | 0.958714  |
| Al467606    | 0.310975  | 0.445775               | 0.519517    | 0.209754  | 0.55417   |
| Mylpf_j2    | 0.0955238 | 0.221051               | 1.21045     | 0.338141  | 0.67858   |
| Zfp553      | 0.605109  | 0.629054               | 0.0559885   | 0.836143  | 0.94739   |
| Zfp771      | 1.85398   | 1.3405                 | -0.467851   | 0.144469  | 0.471711  |
| Zfp771      | 7.14198   | 7.883                  | 0.142421    | 0.330582  | 0.672467  |
| ltgal_j1    | 0.0726194 | 0.0776169              | 0.0960152   | 0.937866  | 1         |
| ltgal_j2    | 0.130644  | 0.0260549              | -2.32602    | 0.276168  | 1         |
| AK045290    | 0.737963  | 0.673997               | -0.130806   | 0.532635  | 0.8044    |
| Prr14_j1    | 0.0632013 | 0.0942791              | 0.576983    | 0.481545  | 1         |
| Prr14_j2    | 0.343627  | 0.343191               | -0.0018315  | 0.995699  | 0.998772  |
| Prr14_j6    | 1.14877   | 0.979085               | -0.230584   | 0.518219  | 0.796351  |
| Fbrs_j1     | 2.89026   | 2.92219                | 0.0158522   | 0.907407  | 0.970721  |
| Fbrs_j5     | 7.92706   | 9.19518                | 0.214093    | 0.107871  | 0.408298  |
| Srcap_j7    | 2.78687   | 2.70416                | -0.0434645  | 0.715541  | 0.897239  |
| Phkg2_j1    | 3.52482   | 3.89822                | 0.145268    | 0.280157  | 0.628999  |
| Rnf40_j5    | 0.0837893 | 0.0643215              | -0.381465   | 0.708677  | 1         |
| Rnf40_j6    | 0.120077  | 0.102743               | -0.224921   | 0.743726  | 1         |
| Ctf1        | 0.514093  | 0.247391               | 0           | 1         | 1         |
| Ctf1_j1     | 0.0821237 | 0.0713673              | 0           | 1         | 1         |
| Ctf1_j3     | 0.120949  | 0.030993               | 0           | 1         | 1         |
| Fbxl19_j3   | 0         | 0.137276               | 0           | 1         | 1         |
| Fbxl19      | 0.681492  | 0.570214               | 0           | 1         | 1         |
| XLOC_030025 | 0.0857924 | 0 -1.79769e+308        |             | 0.037243  | 1         |
| Stx4a       | 8.4       | 8.87764                | 0.0797862   | 0.437284  | 0.747555  |
| Zfp646_j4   | 1.00204   | 0.965855               | -0.0530613  | 0.783921  | 0.927222  |
| Zfp646_j2   | 0.129598  | 0.11076                | -0.2266     | 0.640231  | 1         |
| Bckdk       | 5.20097   | 5.50142                | 0.0810229   | 0.562353  | 0.822121  |
| Bckdk_j1    | 6.07039   | 4.5037                 | -0.430677   | 0.0050303 | 0.0509717 |
| Fus_j1      | 19.67     | 20.2707                | 0           | 1         | 1         |
| Fus_j2      | 9.83022   | 10.3416                | 0           | 1         | 1         |
| Trim72      | 0.0710102 | 0 -1.79769e+308        |             | 0.0121221 | 1         |
| ltgax_j3    | 0.129641  | 0 -1.79769e+308        |             | 0.0023588 | 1         |
| Armc5       | 4.89057   | 4.87993                | -0.00314348 | 0.976981  | 0.993297  |
| Tgfb1i1     | 30.4297   | 34.0358                | 0.161573    | 0.110863  | 0.414403  |
| Bag3        | 122.929   | 131.615                | 0.0985042   | 0.25126   | 0.599096  |
| Inpp5f      | 3.20289   | 3.1736                 | -0.0132536  | 0.909349  | 0.971299  |
| Inpp5f      | 0.497714  | 0.513738               | 0.0457147   | 0.858254  | 0.954952  |
| Sec23ip     | 5.68245   | 5.96985                | 0.0711831   | 0.539813  | 0.808599  |
| Ppapdc1a    | 0.721188  | 0.732796               | 0.0230361   | 0.95804   | 0.987996  |
| Ppapdc1a    | 2.83851   | 2.1076                 | -0.429532   | 0.111736  | 0.416076  |
| Wdr11       | 6.85342   | 6.36387                | -0.10692    | 0.346569  | 0.685483  |
| Wdr11_j1    | 0.18269   | 0.207558               | 0.184117    | 0.753162  | 0.914687  |
| Tacc2_j1    | 0.898485  | 0.756308               | 0           | 1         | 1         |
| Tacc2_j4    | 0.121394  | 0.197525               | 0           | 1         | 1         |
| Plekha1_j1  | 0         | 0.0505983 1.79769e+308 |             | 0.148559  | 1         |

|                  |           |                       |            |           |           |
|------------------|-----------|-----------------------|------------|-----------|-----------|
| Htra1_j1         | 0.10505   | 0.0743122             | -0.499406  | 0.765708  | 1         |
| Htra1            | 3.86583   | 3.0842                | -0.325881  | 0.0106999 | 0.0899732 |
| Acadsb           | 1.15554   | 1.04816               | 0          | 1         | 1         |
| Bub3             | 31.0248   | 31.6152               | 0.0271976  | 0.77586   | 0.924081  |
| Gpr26            | 0.489635  | 0.482003              | -0.0226653 | 0.916107  | 0.973886  |
| XLOC_030053      | 0.0806177 | 0.0756485             | -0.091785  | 0.900021  | 1         |
| XLOC_030053      | 0.0664048 | 0.0192481             | -1.78657   | 0.249446  | 1         |
| XLOC_030053      | 0.0608336 | 0 -1.79769e+308       |            | 0.0425124 | 1         |
| XLOC_030053      | 0.170332  | 0.130344              | -0.386021  | 0.647035  | 0.863936  |
| Lhpp             | 1.8453    | 1.97299               | 0.0965284  | 0.692229  | 0.886088  |
| Fam175b          | 11.9992   | 10.7092               | -0.164098  | 0.143214  | 0.470211  |
| Zranb1_j1        | 0.64015   | 0.0399057             | 0          | 1         | 1         |
| 2700050L05Rik    | 0.0706752 | 5.23E-05              | 0          | 1         | 1         |
| 2700050L05Rik_j1 | 1.28099   | 1.12345               | 0          | 1         | 1         |
| Bccip            | 3.15695   | 3.09798               | 0          | 1         | 1         |
| XLOC_030060      | 0.112061  | 0.0508821             | -1.13906   | 0.331937  | 1         |
| Dock1            | 0.892119  | 0.688563              | 0          | 1         | 1         |
| XLOC_030062      | 0.382247  | 0.280966              | -0.444108  | 0.633771  | 0.857933  |
| Ptpre            | 1.256     | 0.68728               | 0          | 1         | 1         |
| Ptpre_j4         | 0.465956  | 0.195575              | 0          | 1         | 1         |
| Mgmt_j1          | 0.0698828 | 0.0579607             | -0.269862  | 0.781008  | 1         |
| Mgmt             | 0.332262  | 0.349808              | 0.0742428  | 0.849749  | 0.952228  |
| Glrx3_j1         | 0.469662  | 0.372069              | -0.336054  | 0.553655  | 0.817251  |
| Glrx3_j3         | 0         | 0.102026 1.79769e+308 |            | 0.0003384 | 1         |
| Glrx3_j5         | 0.235245  | 0.10178               | -1.20871   | 0.265065  | 0.613897  |
| Glrx3_j7         | 0.855686  | 0.877987              | 0.0371182  | 0.86064   | 0.955865  |
| XLOC_030066      | 5.87803   | 6.10752               | 0          | 1         | 1         |
| XLOC_030067      | 0.158021  | 0.0345692             | -2.19256   | 0.243812  | 0.591082  |
| Ppp2r2d_j4       | 0.156307  | 0.129762              | 0          | 1         | 1         |
| Jakmip3_j4       | 0.0466083 | 0 -1.79769e+308       |            | 0.0649261 | 1         |
| Jakmip3_j3       | 0.500001  | 1.58E-05              | -14.9543   | 0.981908  | 0.99448   |
| Jakmip3_j12      | 0.161824  | 0 -1.79769e+308       |            | 0.0006638 | 0.0102982 |
| Jakmip3_j15      | 0.842706  | 0.480236              | -0.811284  | 0.0542511 | 0.271585  |
| Dpysl4           | 6.11263   | 6.39667               | 0.0655263  | 0.632623  | 0.857248  |
| Dpysl4_j1        | 0.183549  | 0.082299              | -1.15722   | 0.313239  | 0.657552  |
| Pwwp2b           | 3.51518   | 3.82294               | 0.121083   | 0.461748  | 0.762976  |
| Pwwp2b           | 1.45321   | 1.54463               | 0.0880213  | 0.744544  | 0.910838  |
| Inpp5a           | 6.9305    | 7.81436               | 0.173167   | 0.160069  | 0.49462   |
| Gpr123_j2        | 0.145877  | 0 -1.79769e+308       |            | 3.61E-05  | 0.000904  |
| Gpr123           | 0.768746  | 0.490724              | -0.647593  | 0.0148128 | 0.113851  |
| Gpr123_j1        | 0.26028   | 0.0226004             | -3.52564   | 0.0036553 | 0.0402895 |
| Kndc1_j1         | 0.177248  | 4.08E-05              | 0          | 1         | 1         |
| Kndc1            | 2.18162   | 1.39501               | 0          | 1         | 1         |
| Zfp511           | 4.35687   | 4.82848               | 0.14828    | 0.378083  | 0.709693  |
| Paox_j2          | 0.211067  | 0.0179617             | -3.55471   | 0.18621   | 0.526701  |
| Paox_j3          | 0.110367  | 0.0284474             | -1.95594   | 0.465921  | 1         |
| Mtg1_j1          | 6.33525   | 5.99339               | -0.0800289 | 0.699776  | 0.889447  |

|             |           |           |               |           |           |
|-------------|-----------|-----------|---------------|-----------|-----------|
| Mtg1        | 0.272937  | 0.0523032 | -2.3836       | 0.0026188 | 0.0309461 |
| Mtg1_j4     | 0.586735  | 0         | -1.79769e+308 | 0.0002506 | 0.0046309 |
| Cyp2e1      | 0.360358  | 0.17203   | -1.06677      | 0.0785352 | 0.339822  |
| Ric8        | 1.96441   | 2.25544   | 0             | 1         | 1         |
| Psm13       | 43.0179   | 44.565    | 0             | 1         | 1         |
| Ath1        | 1.08778   | 1.37664   | 0.339762      | 0.133705  | 0.455139  |
| Ifitm1      | 1.73401   | 1.70211   | -0.0267819    | 0.93329   | 0.979713  |
| B4galnt4_j3 | 0.160102  | 0.0569563 | -1.49107      | 0.0827293 | 0.35061   |
| B4galnt4_j4 | 0.307462  | 0.355586  | 0.209792      | 0.636149  | 0.858939  |
| Pkp3        | 1.60321   | 1.83923   | 0.198142      | 0.421105  | 0.737255  |
| Ptdss2      | 15.6608   | 15.5182   | -0.0131945    | 0.90296   | 0.969047  |
| Lrrc56_j6   | 0.0462523 | 0.0577879 | 0.32124       | 0.790871  | 1         |
| Lrrc56_j5   | 0.522086  | 0.32358   | -0.690166     | 0.146384  | 0.474685  |
| Lrrc56      | 0.500087  | 0.610571  | 0.287981      | 0.439794  | 0.749306  |
| Rassf7      | 0.915839  | 0.94737   | 0.0488341     | 0.878972  | 0.961379  |
| Rassf7_j4   | 0.316174  | 0.139768  | -1.17769      | 0.160309  | 0.49487   |
| Phrf1       | 0.81179   | 1.48162   | 0             | 1         | 1         |
| Eps8l2_j5   | 0.0217035 | 0.200934  | 3.21072       | 0.0040679 | 0.0434422 |
| Taldo1      | 37.144    | 45.3816   | 0             | 1         | 1         |
| Gm4535      | 2.84203   | 3.27421   | 0.204224      | 0.36722   | 0.70072   |
| Rplp2_j1    | 0.239988  | 0.118016  | -1.02398      | 0.133206  | 0.454201  |
| Rplp2_j6    | 2.32182   | 2.14021   | -0.117504     | 0.773559  | 0.923145  |
| Pnpla2_j1   | 0.456079  | 1.46796   | 1.68646       | 1.58E-05  | 0.0004574 |
| Pnpla2_j2   | 0.989979  | 1.66778   | 0.752463      | 0.0203709 | 0.142705  |
| Efcab4a_j2  | 7.23172   | 7.01088   | 0             | 1         | 1         |
| Ap2a2_j4    | 23.4976   | 30.0533   | 0             | 1         | 1         |
| Ap2a2       | 48.2655   | 46.866    | 0             | 1         | 1         |
| Muc2_j1     | 0.0471482 | 0         | -1.79769e+308 | 0.0253966 | 1         |
| Brsk2_j2    | 4.44069   | 3.74959   | 0             | 1         | 1         |
| Brsk2_j5    | 12.1192   | 10.518    | 0             | 1         | 1         |
| Lsp1        | 1.07295   | 1.08686   | 0.0185827     | 0.952659  | 0.986298  |
| Lsp1        | 0.498986  | 0.846159  | 0.761931      | 0.0791832 | 0.341583  |
| Cd81_j2     | 0.738073  | 0.621216  | 0             | 1         | 1         |
| Cd81_j4     | 0.160237  | 0.148297  | 0             | 1         | 1         |
| Slc22a18    | 11.0056   | 8.88343   | -0.309045     | 0.0243618 | 0.161426  |
| Dhcr7_j4    | 0.205829  | 0         | -1.79769e+308 | 0.0077392 | 0.0709541 |
| Dhcr7_j6    | 1.643     | 0.532184  | -1.62634      | 0.0044697 | 0.0466987 |
| Shank2_j2   | 0.249674  | 0.195197  | -0.355115     | 0.274326  | 0.62342   |
| Shank2_j1   | 0.0698852 | 0         | -1.79769e+308 | 7.77E-06  | 1         |
| Shank2_j5   | 0.0835127 | 0         | -1.79769e+308 | 4.78E-06  | 1         |
| Fgf3        | 0.697018  | 2.02598   | 0             | 1         | 1         |
| Oraov1      | 15.6879   | 18.4418   | 0.233329      | 0.0262499 | 0.170097  |
| Oraov1_j1   | 3.12644   | 2.70303   | -0.209947     | 0.197798  | 0.540728  |
| Mrgprf      | 0.628547  | 1.25795   | 1.00099       | 0.0002049 | 0.0039161 |
| Mrgprd      | 33.2399   | 23.2113   | 0             | 1         | 1         |
| Tfpt_j1     | 1.95357   | 2.35795   | 0.27142       | 0.404012  | 0.726569  |
| Tfpt_j2     | 1.40218   | 1.64485   | 0.230283      | 0.20748   | 0.55198   |

|                  |           |                 |             |           |           |
|------------------|-----------|-----------------|-------------|-----------|-----------|
| Mboat7_j2        | 6.40012   | 6.48774         | 0           | 1         | 1         |
| Mboat7_j6        | 2.78306   | 2.70335         | 0           | 1         | 1         |
| Lilrb3_j6        | 0.157805  | 0.456504        | 1.53248     | 0.0748967 | 0.330165  |
| Lilrb3_j5        | 0.221461  | 0.227681        | 0.0399644   | 0.968469  | 0.991077  |
| Lilrb3_j9        | 0.185313  | 0.213019        | 0.20102     | 0.914064  | 0.973052  |
| 9430041J12Rik_j3 | 0.301207  | 0.246913        | -0.286754   | 0.399101  | 0.722725  |
| 9430041J12Rik_j2 | 0.176201  | 0.190916        | 0.115718    | 0.779141  | 0.925601  |
| Rdh13_j5         | 0.621645  | 0.748763        | 0           | 1         | 1         |
| Rdh13_j3         | 0.105661  | 0.131106        | 0           | 1         | 1         |
| Ppp1r12c         | 23.7452   | 26.4611         | 0           | 1         | 1         |
| Ppp1r12c_j1      | 5.46709   | 6.08359         | 0           | 1         | 1         |
| Tnnt1_j1         | 0.0831741 | 0 -1.79769e+308 | 0.0709361   |           | 1         |
| 6030429G01Rik_j1 | 0.0857064 | 0.10982         | 0.357662    | 0.607292  | 1         |
| 6030429G01Rik_j8 | 0.126568  | 0 -1.79769e+308 | 0.0002803   |           | 1         |
| Syt5_j1          | 25.4585   | 25.1747         | 0           | 1         | 1         |
| Syt5_j2          | 6.7749    | 7.18073         | 0           | 1         | 1         |
| Ppp6r1           | 24.3322   | 26.1136         | 0           | 1         | 1         |
| Ppp6r1_j7        | 9.21368   | 5.74498         | 0           | 1         | 1         |
| Hspbp1_j1        | 6.75472   | 8.66184         | 0           | 1         | 1         |
| Hspbp1           | 21.0684   | 20.5696         | 0           | 1         | 1         |
| Cox6b2_j4        | 0.212843  | 0.416868        | 0.9698      | 0.393039  | 0.719015  |
| Cox6b2           | 0.875511  | 0.879021        | 0.00577163  | 0.990556  | 0.997044  |
| 2210411K11Rik_j1 | 0.3052    | 0.303611        | -0.00753362 | 0.988622  | 0.996598  |
| Shisa7_j2        | 0.444859  | 0.250575        | -0.828107   | 0.013989  | 0.109453  |
| Shisa7_j1        | 1.24346   | 1.41222         | 0.183604    | 0.260389  | 0.609134  |
| Zfp579_j1        | 1.09136   | 1.03314         | -0.0790923  | 0.773589  | 0.923157  |
| Zfp579           | 0.666371  | 0.428765        | -0.636139   | 0.362297  | 0.696645  |
| Zfp579           | 1.3828    | 1.58261         | 0.194714    | 0.474058  | 0.7705    |
| Fiz1             | 4.74381   | 3.67928         | 0           | 1         | 1         |
| Zfp784           | 0.375016  | 0.339927        | 0           | 1         | 1         |
| AK080857_j3      | 0.482745  | 0.704504        | 0           | 1         | 1         |
| Rasl2-9-ps       | 0.185735  | 0.123916        | -0.58389    | 0.381914  | 0.712127  |
| Zfp787_j1        | 0.916903  | 1.01565         | 0.147556    | 0.650495  | 0.865852  |
| Zfp787_j4        | 0.0674487 | 0 -1.79769e+308 | 0.0400027   |           | 1         |
| Zfp583_j1        | 0.513981  | 0.660326        | 0.361465    | 0.384487  | 0.713264  |
| Zfp583_j2        | 0.154294  | 0.108293        | -0.510746   | 0.54586   | 0.812711  |
| Zfp583           | 1.12686   | 1.33306         | 0.24243     | 0.319316  | 0.662717  |
| Zim1_j2          | 0.42263   | 0.249187        | -0.762166   | 0.0046269 | 0.0478493 |
| Peg3             | 8.48574   | 7.34973         | 0           | 1         | 1         |
| Zfp954           | 3.87939   | 3.45771         | 0           | 1         | 1         |
| Clcn4-2_j6       | 17.9207   | 16.3265         | 0           | 1         | 1         |
| Clcn4-2          | 0.591791  | 0.613086        | 0           | 1         | 1         |
| Clcn4-2_j3       | 0.176083  | 0               | 0           | 1         | 1         |
| Zik1             | 1.39649   | 1.65836         | 0.247951    | 0.141398  | 0.467741  |
| Znf551           | 0.17153   | 0.0669568       | -1.35716    | 0.0577514 | 0.281811  |
| Zfp551           | 0.430541  | 0.424761        | -0.0195007  | 0.947337  | 0.984552  |
| Zscan18          | 1.51353   | 0.764755        | -0.984847   | 0.0080778 | 0.0731099 |



|                  |            |           |            |           |           |
|------------------|------------|-----------|------------|-----------|-----------|
| Zscan18_j5       | 0.311527   | 0.91865   | 1.56016    | 0.0006189 | 0.0097383 |
| Zscan18_j3       | 1.55147    | 1.71784   | 0.146963   | 0.453302  | 0.758028  |
| Zfp329           | 0.636018   | 0.711198  | 0.161183   | 0.387223  | 0.715059  |
| XLOC_030169      | 0.117494   | 0.0241922 | -2.27997   | 0.272982  | 1         |
| Zbtb45_j1        | 4.49617    | 4.59748   | 0          | 1         | 1         |
| Zbtb45           | 1.45584    | 1.56924   | 0          | 1         | 1         |
| Zbtb45_j2        | 0.751785   | 0.503609  | 0          | 1         | 1         |
| Ube2m_j4         | 0.445157   | 0.487012  | 0          | 1         | 1         |
| Ube2m            | 1.93602    | 1.71024   | 0          | 1         | 1         |
| Mzf1_j1          | 0.308396   | 0.28156   | 0          | 1         | 1         |
| Mzf1             | 0.0868505  | 0.0570269 | 0          | 1         | 1         |
| Mzf1             | 0.304083   | 0.151542  | 0          | 1         | 1         |
| Vmn1r85          | 0.178564   | 0.11584   | -0.624307  | 0.436171  | 0.746874  |
| 6330408A02Rik_j2 | 1.15524    | 0.76451   | 0          | 1         | 1         |
| Sepw1            | 162.124    | 204.59    | 0.335634   | 0.0001181 | 0.0024703 |
| Gltscr2          | 5.35192    | 5.36854   | 0          | 1         | 1         |
| Ehd2_j4          | 0.913405   | 0.728587  | -0.326154  | 0.543256  | 0.810795  |
| Ehd2             | 7.26749    | 7.31045   | 0.00850283 | 0.936659  | 0.980567  |
| Gltscr1_j3       | 1.2206     | 1.11571   | 0          | 1         | 1         |
| Dhx34            | 2.14137    | 1.45991   | 0          | 1         | 1         |
| Dhx34_j3         | 0.160875   | 0.22873   | 0          | 1         | 1         |
| C5ar1            | 0.0885263  | 0.70398   | 2.99136    | 3.38E-05  | 0.0008569 |
| Ccdc9_j8         | 1.63835    | 2.17637   | 0.409673   | 0.0382445 | 0.217407  |
| Ccdc9_j7         | 0.66063    | 0.892005  | 0.43321    | 0.140667  | 0.466487  |
| Ccdc9_j10        | 2.93844    | 4.36973   | 0.572494   | 0.0072146 | 0.0674392 |
| Npas1_j2         | 0.23455    | 0.18597   | -0.334828  | 0.772828  | 0.922935  |
| Grif1            | 24.3276    | 21.1524   | -0.201771  | 0.0207964 | 0.144832  |
| Fkrp_j2          | 0.184472   | 0.0619543 | 0          | 1         | 1         |
| 9330104G04Rik_j1 | 0.390317   | 0.188638  | -1.04903   | 0.111578  | 0.41568   |
| Calm3_j4         | 1.24011    | 0.675706  | 0          | 1         | 1         |
| Calm3_j2         | 90.3467    | 86.4301   | 0          | 1         | 1         |
| Ppp5c            | 39.2006    | 40.4995   | 0.0470296  | 0.606122  | 0.844912  |
| XLOC_030200      | 1.59722    | 1.18776   | -0.427321  | 0.372743  | 0.705702  |
| XLOC_030199      | 7.14973    | 6.29049   | -0.184717  | 0.367803  | 0.701102  |
| Ccdc61           | 2.33079    | 2.27971   | -0.0319743 | 0.884614  | 0.963422  |
| Qpctl            | 0.0102519  | 0.106572  | 0          | 1         | 1         |
| Vasp             | 10.5003    | 10.1662   | 0          | 1         | 1         |
| Ppm1n            | 0.407435   | 0.319204  | -0.35209   | 0.351905  | 0.689084  |
| Cd3eap           | 1.14902    | 1.2672    | 0.141243   | 0.469045  | 0.767335  |
| AK020867_j1      | 0.156976   | 0.138712  | -0.178445  | 0.801159  | 0.933726  |
| Mark4_j2         | 22.0179    | 22.8715   | 0          | 1         | 1         |
| Lrrc68           | 10.7605    | 11.4342   | 0          | 1         | 1         |
| Lrrc68_j1        | 17.2697    | 19.3716   | 0          | 1         | 1         |
| Lrrc68_j2        | 1.42217    | 1.3102    | 0          | 1         | 1         |
| Gemin7_j1        | 28.7605    | 30.5321   | 0          | 1         | 1         |
| Clasrp_j6        | 0.00466809 | 0.4282    | 6.51931    | 0.054128  | 0.271163  |
| Relb_j3          | 1.39789    | 1.66244   | 0          | 1         | 1         |

|             |           |                 |            |           |           |
|-------------|-----------|-----------------|------------|-----------|-----------|
| Clptm1      | 57.4588   | 53.5102         | -0.102716  | 0.24608   | 0.593595  |
| Apoc1       | 2.54321   | 3.22021         | 0.340506   | 0.253602  | 0.601761  |
| Pvrl2       | 2.10808   | 0.172136        | 0          | 1         | 1         |
| Pvrl2       | 14.6377   | 16.2462         | 0          | 1         | 1         |
| Bcam_j1     | 35.0344   | 55.2849         | 0          | 1         | 1         |
| Bcam        | 83.6476   | 104.125         | 0          | 1         | 1         |
| Cblc_j1     | 0.158319  | 0.17098         | 0          | 1         | 1         |
| Bcl3        | 0.36948   | 0.135826        | 0          | 1         | 1         |
| Pvr         | 2.53753   | 2.93814         | 0.211477   | 0.201576  | 0.54514   |
| Zfp109_j1   | 0.430141  | 0.0833722       | -2.36717   | 0.0001816 | 0.0035413 |
| Zfp61       | 0.354911  | 0.475328        | 0.421464   | 0.331068  | 0.672809  |
| Zfp94_j2    | 0.0910571 | 0 -1.79769e+308 |            | 0.0004228 | 1         |
| Zfp94       | 0.439405  | 0.4593          | 0.0638864  | 0.860033  | 0.955725  |
| Zfp94_j6    | 0.90743   | 0.443695        | -1.03222   | 0.066887  | 0.309147  |
| Zfp94_j9    | 0.844606  | 1.0502          | 0.314315   | 0.470648  | 0.768392  |
| Zfp575      | 1.3638    | 1.73325         | 0.345843   | 0.0816174 | 0.347986  |
| Zfp575_j1   | 0.0612688 | 0 -1.79769e+308 |            | 0.0271505 | 1         |
| Rabac1      | 239.534   | 252.967         | 0.0787199  | 0.359071  | 0.694359  |
| Pou2f2_j7   | 0.0762957 | 0.0723997       | -0.0756179 | 0.936501  | 1         |
| Pou2f2_j8   | 0.198548  | 0.161802        | -0.295255  | 0.59552   | 0.838859  |
| Flame-3     | 1.49368   | 1.44765         | 0          | 1         | 1         |
| Dedd2_j1    | 1.58364   | 2.549           | 0          | 1         | 1         |
| Dedd2_j3    | 1.43548   | 9.99E-05        | 0          | 1         | 1         |
| Gsk3a_j3    | 0.386961  | 0               | 0          | 1         | 1         |
| Gsk3a_j4    | 0.25211   | 0               | 0          | 1         | 1         |
| Erf_j1      | 12.9033   | 16.3463         | 0.341218   | 0.004879  | 0.0497899 |
| Pafah1b3_j2 | 0.448351  | 0.123725        | -1.85749   | 0.153672  | 0.486379  |
| Pafah1b3    | 14.7363   | 15.259          | 0.0502818  | 0.735238  | 0.906679  |
| Lipe        | 1.30761   | 2.07135         | 0          | 1         | 1         |
| Lipe        | 1.2049    | 1.60695         | 0          | 1         | 1         |
| Ceacam1     | 0.403255  | 0.383261        | 0          | 1         | 1         |
| Ceacam1_j2  | 0.0708003 | 0               | 0          | 1         | 1         |
| Ceacam2_j2  | 0.283239  | 0               | 0          | 1         | 1         |
| Ceacam1_j5  | 0.379359  | 0.285482        | 0          | 1         | 1         |
| Bckdha      | 13.5249   | 13.5854         | 0.00644569 | 0.945854  | 0.983787  |
| Tmem91_j1   | 0.146786  | 0.101644        | -0.530189  | 0.41168   | 0.730802  |
| Ccdc97_j1   | 6.7825    | 6.50535         | 0          | 1         | 1         |
| Ccdc97_j4   | 11.1347   | 10.6493         | 0          | 1         | 1         |
| Ccdc97      | 1.88562   | 1.62265         | 0          | 1         | 1         |
| Hnrnpul1    | 7.77753   | 7.31702         | 0          | 1         | 1         |
| Axl_j4      | 3.71157   | 3.26686         | 0          | 1         | 1         |
| Axl         | 4.12429   | 4.69322         | 0          | 1         | 1         |
| Cyp2s1      | 0.572849  | 0.207216        | -1.46702   | 0.0025021 | 0.0298618 |
| Egln2       | 33.7176   | 33.227          | 0          | 1         | 1         |
| Rab4b       | 54.9918   | 51.8084         | 0          | 1         | 1         |
| Mia1        | 0.348633  | 0.469882        | 0.430589   | 0.341992  | 0.681843  |
| Snrpa       | 8.98328   | 9.48595         | 0.0785487  | 0.607561  | 0.845335  |

|                  |           |                 |            |           |           |
|------------------|-----------|-----------------|------------|-----------|-----------|
| Itpkc            | 0.12247   | 0.272729        | 1.15504    | 0.0013112 | 0.0177579 |
| Ltbp4            | 0.811599  | 0.850487        | 0          | 1         | 1         |
| Spnb4_j3         | 2.14062   | 1.51489         | -0.49882   | 0.0499728 | 0.258259  |
| Spnb4            | 2.10943   | 1.97879         | -0.0922353 | 0.512963  | 0.792348  |
| Spnb4_j8         | 0.0553477 | 0 -1.79769e+308 |            | 0.0120634 | 1         |
| Spnb4_j7         | 0.0658798 | 0 -1.79769e+308 |            | 0.0090701 | 1         |
| Pld3_j3          | 0.104659  | 0.0420457       | 0          | 1         | 1         |
| Map3k10          | 2.62726   | 2.58427         | 0          | 1         | 1         |
| Map3k10_j4       | 3.73418   | 1.88737         | 0          | 1         | 1         |
| Zfp780b_j1       | 0.231105  | 0.206115        | 0          | 1         | 1         |
| Zfp780b          | 0.908298  | 0.764705        | 0          | 1         | 1         |
| Zfp780b_j2       | 0.751268  | 0.657949        | 0          | 1         | 1         |
| Psmc4            | 69.1543   | 74.418          | 0.105834   | 0.236594  | 0.583799  |
| BC089491_j2      | 0.244296  | 0.155083        | -0.655585  | 0.340239  | 0.680323  |
| Timm50           | 14.5446   | 14.8194         | 0.0270011  | 0.826675  | 0.944157  |
| Supt5h_j6        | 0.276523  | 0.211634        | 0          | 1         | 1         |
| Supt5h_j7        | 0.219363  | 0.231395        | 0          | 1         | 1         |
| Supt5h           | 1.88068   | 0.29045         | 0          | 1         | 1         |
| Plekhg2          | 1.59755   | 2.12725         | 0          | 1         | 1         |
| Plekhg2_j6       | 0.597867  | 0.485294        | 0          | 1         | 1         |
| Plekhg2          | 0.507349  | 0.680342        | 0          | 1         | 1         |
| Plekhg2          | 0.590314  | 0.604505        | 0          | 1         | 1         |
| Zfp36            | 2.75895   | 3.87301         | 0.489336   | 0.0049149 | 0.0500313 |
| Samd4b           | 8.00063   | 8.16364         | 0.0290991  | 0.791448  | 0.930476  |
| Samd4b_j2        | 3.09      | 3.25533         | 0.0751981  | 0.618572  | 0.850136  |
| Nccrp1           | 0.313654  | 0.216152        | -0.537124  | 0.353361  | 0.689807  |
| Pak4_j1          | 0.253869  | 0               | 0          | 1         | 1         |
| Pak4             | 2.79179   | 2.28479         | 0          | 1         | 1         |
| C330005M16Rik_j2 | 0.0822574 | 0 -1.79769e+308 |            | 0.0004514 | 1         |
| C330005M16Rik_j1 | 0.407069  | 0.299033        | -0.444968  | 0.184363  | 0.524849  |
| Mrps12           | 35.4719   | 37.4766         | 0.0793146  | 0.51088   | 0.79135   |
| Nfkbib           | 11.0323   | 12.9849         | 0          | 1         | 1         |
| Actn4            | 28.8844   | 32.8625         | 0.186152   | 0.037113  | 0.21334   |
| Eif3k_j1         | 8.27503   | 8.62839         | 0.0603278  | 0.796176  | 0.932066  |
| Eif3k            | 75.5772   | 78.3787         | 0.0525108  | 0.582179  | 0.832693  |
| Ryr1_j2          | 0.0679864 | 0 -1.79769e+308 |            | 0.0310224 | 1         |
| Fam98c_j1        | 1.8035    | 2.45256         | 0.443489   | 0.187923  | 0.529048  |
| Fam98c           | 9.35071   | 7.68273         | -0.283456  | 0.0874629 | 0.361921  |
| Spred3_j1        | 0.0485961 | 0 -1.79769e+308 |            | 0.0085854 | 1         |
| Psm8_j1          | 41.7756   | 51.8405         | 0.311418   | 0.0071481 | 0.0669529 |
| Psm8             | 41.6229   | 47.1423         | 0.179644   | 0.0609325 | 0.29121   |
| 2200002D01Rik    | 0.74759   | 1.03742         | 0.472686   | 0.0053485 | 0.0533806 |
| Spint2           | 0.82467   | 0.739268        | -0.157719  | 0.683625  | 0.881559  |
| Sipa1l3_j4       | 0.82693   | 1.18408         | 0.517933   | 0.00372   | 0.0407528 |
| XLOC_030290      | 0.115289  | 0.0696559       | -0.726938  | 0.314797  | 1         |
| Zfp940_j1        | 0.10128   | 0.0834196       | -0.279889  | 0.767664  | 1         |
| Zfp940           | 0.290483  | 0.162628        | -0.836874  | 0.132559  | 0.453138  |

|             |           |                 |            |           |           |
|-------------|-----------|-----------------|------------|-----------|-----------|
| Zfp27_j3    | 0.432912  | 0.0269628       | 0          | 1         | 1         |
| Zfp27       | 1.18232   | 1.35126         | 0          | 1         | 1         |
| XLOC_030295 | 0.144226  | 0.106999        | -0.430728  | 0.543298  | 0.810795  |
| Zfp14_j6    | 0.706664  | 0.485065        | 0          | 1         | 1         |
| Zfp14_j7    | 0.13786   | 0               | 0          | 1         | 1         |
| Zfp82       | 0.0830392 | 0.21927         | 1.40085    | 0.0846029 | 0.35508   |
| Zfp82_j2    | 0.382941  | 0.370752        | -0.0466644 | 0.919756  | 0.97481   |
| Zfp566      | 1.1713    | 0.99259         | -0.238837  | 0.361734  | 0.696116  |
| Zfp146_j2   | 0.631594  | 0.907855        | 0          | 1         | 1         |
| Zfp146      | 3.668     | 3.74199         | 0          | 1         | 1         |
| Capns1_j2   | 1.09013   | 1.46145         | 0          | 1         | 1         |
| Capns1_j3   | 0.303673  | 0.391596        | 0          | 1         | 1         |
| Tbcb        | 0.341179  | 0.431044        | 0.337307   | 0.48612   | 0.777426  |
| Wdr62_j1    | 0.0879916 | 0.0260563       | -1.75573   | 0.279688  | 1         |
| Wdr62_j3    | 0.090153  | 0 -1.79769e+308 |            | 0.0002592 | 1         |
| Lrfn3       | 7.25756   | 7.29483         | 0.00739041 | 0.949254  | 0.985343  |
| Aplp1       | 91.7668   | 102.894         | 0.165119   | 0.0550003 | 0.273564  |
| Arhgap33_j7 | 1.76386   | 2.56237         | 0          | 1         | 1         |
| BC053749_j6 | 0.121081  | 0.20541         | 0.762532   | 0.218969  | 0.565277  |
| Wbp7_j2     | 4.85396   | 6.19877         | 0          | 1         | 1         |
| Wbp7_j3     | 1.35209   | 1.31006         | 0          | 1         | 1         |
| Wbp7_j5     | 1.70543   | 1.87527         | 0          | 1         | 1         |
| Wbp7_j4     | 0.549244  | 0.490437        | 0          | 1         | 1         |
| Zbtb32_j1   | 0.075565  | 0.0529703       | -0.512535  | 0.453381  | 1         |
| Cox6b1      | 119.049   | 127.242         | 0.0960229  | 0.306635  | 0.651879  |
| Rbm42       | 19.0856   | 23.6841         | 0.311439   | 0.0050423 | 0.0510331 |
| Rbm42_j4    | 0.505474  | 0.808285        | 0.677228   | 0.279269  | 0.628017  |
| Rbm42_j6    | 0.0887147 | 0 -1.79769e+308 |            | 0.0157805 | 1         |
| Rbm42_j13   | 0.172353  | 0.168895        | -0.0292347 | 0.967154  | 0.99061   |
| Tmem147     | 28.147    | 26.0555         | -0.111392  | 0.298123  | 0.644738  |
| Mag         | 0.68221   | 0.467227        | -0.546092  | 0.189951  | 0.531833  |
| Mag_j1      | 1.87879   | 2.94197         | 0.646979   | 0.0003705 | 0.0063585 |
| Usf2_j5     | 5.20474   | 6.25266         | 0          | 1         | 1         |
| Fxyd5_j6    | 1.25041   | 3.09534         | 0          | 1         | 1         |
| Fxyd5_j8    | 2.04169   | 2.15133         | 0          | 1         | 1         |
| Fxyd5_j7    | 2.36567   | 2.68031         | 0          | 1         | 1         |
| Fxyd1_j3    | 0.677698  | 0.483775        | 0          | 1         | 1         |
| Fxyd1_j2    | 4.95022   | 9.64595         | 0          | 1         | 1         |
| Hpn_j8      | 0.0603735 | 0.0315098       | -0.938115  | 0.641791  | 1         |
| Hpn_j4      | 0.259562  | 0.480174        | 0.887481   | 0.16606   | 0.502787  |
| Scn1b_j1    | 207.317   | 173.165         | -0.25969   | 0.0031881 | 0.0361873 |
| Scn1b       | 6.72011   | 3.28466         | -1.03274   | 7.36E-07  | 3.19E-05  |
| Gramd1a_j2  | 11.39     | 15.0272         | 0          | 1         | 1         |
| Gramd1a     | 0.647231  | 0.449941        | 0          | 1         | 1         |
| Gramd1a_j3  | 0.660637  | 0.81403         | 0          | 1         | 1         |
| Wtip_j1     | 0.412637  | 0.301338        | -0.45349   | 0.506055  | 0.788576  |
| Wtip        | 0.933587  | 1.63049         | 0.804447   | 0.0168905 | 0.125161  |

|                  |          |             |             |           |           |
|------------------|----------|-------------|-------------|-----------|-----------|
| Uba2             | 29.6257  | 29.485      | -0.00687198 | 0.94048   | 0.981888  |
| Pdcd2l           | 8.22236  | 8.78307     | 0.0951729   | 0.50791   | 0.789986  |
| Gpi1_j3          | 0.678524 | 0.88259     | 0           | 1         | 1         |
| 4931406P16Rik_j3 | 2.5721   | 2.29237     | 0           | 1         | 1         |
| Lsm14a_j2        | 2.34862  | 2.10864     | 0           | 1         | 1         |
| Lsm14a           | 6.47833  | 5.97978     | 0           | 1         | 1         |
| Kctd15_j1        | 4.10434  | 3.82245     | 0           | 1         | 1         |
| Kctd15_j2        | 5.70717  | 5.15656     | 0           | 1         | 1         |
| Chst8_j1         | 5.46088  | 5.02186     | -0.120912   | 0.501174  | 0.785338  |
| Chst8            | 8.67237  | 6.32254     | -0.455922   | 0.0010296 | 0.0146277 |
| Cebpg_j1         | 1.01403  | 0.330984    | 0           | 1         | 1         |
| Cebpg            | 7.25288  | 6.67712     | 0           | 1         | 1         |
| Lrp3             | 17.3005  | 12.6489     | 0           | 1         | 1         |
| Gpatch1          | 3.28528  | 3.0305      | -0.11646    | 0.45815   | 0.7608    |
| C230052I12Rik    | 2.27912  | 2.5593      | 0.167272    | 0.290913  | 0.638208  |
| Nudt19           | 10.0115  | 9.92459     | -0.0125805  | 0.909968  | 0.971581  |
| Pdcd5_j5         | 0.498723 | 0.565625    | 0.181608    | 0.795518  | 0.931914  |
| Pdcd5_j11        | 0.59857  | 0.353048    | -0.761653   | 0.246492  | 0.594158  |
| Dpy19l3          | 0.867913 | 1.02876     | 0.245278    | 0.146774  | 0.475127  |
| Zfp507_j4        | 0.494847 | 0.380158    | 0           | 1         | 1         |
| Zfp507_j6        | 0.186685 | 0.214687    | 0           | 1         | 1         |
| Zfp536           | 0.150826 | 0.101426    | -0.572447   | 0.184076  | 0.524679  |
| C80913_j3        | 2.05519  | 2.1974      | 0           | 1         | 1         |
| C80913           | 3.80049  | 4.31347     | 0           | 1         | 1         |
| C80913_j4        | 1.04482  | 0.000245938 | 0           | 1         | 1         |
| Ccne1            | 6.06055  | 5.8924      | -0.0405952  | 0.76927   | 0.921491  |
| Plekhf1          | 0.706824 | 0.990396    | 0.486655    | 0.106623  | 0.405655  |
| Pop4             | 7.22817  | 6.36963     | 0           | 1         | 1         |
| Pop4_j1          | 0.834452 | 0.470114    | 0           | 1         | 1         |
| Gm6872           | 4.08056  | 4.15562     | 0.0262942   | 0.906243  | 0.970331  |
| RP23-147O14.6    | 91.1825  | 98.4162     | 0.110139    | 0.263908  | 0.612664  |
| BC063263_j3      | 0.526064 | 0.489168    | 0           | 1         | 1         |
| BC063263_j2      | 0.663456 | 0.47024     | 0           | 1         | 1         |
| Gm5595_j2        | 0.140432 | 0.158843    | 0.17773     | 0.799426  | 0.933125  |
| Gm5595_j1        | 0.630264 | 0.432253    | -0.54408    | 0.155586  | 0.488785  |
| Gm9294           | 24.5823  | 29.042      | 0.240524    | 0.0485882 | 0.253904  |
| Zfp715_j2        | 0.995538 | 1.00631     | 0           | 1         | 1         |
| Zfp715_j3        | 0.221557 | 0.0708692   | 0           | 1         | 1         |
| Zfp715           | 1.46786  | 2.17968     | 0           | 1         | 1         |
| Zfp715_j5        | 0.658384 | 0.347458    | 0           | 1         | 1         |
| Iglon5           | 18.7902  | 17.8101     | -0.0772854  | 0.451646  | 0.75674   |
| Cd33             | 0.260842 | 0.402893    | 0.627221    | 0.0463939 | 0.246963  |
| Siglece_j6       | 0.119557 | 0.0624525   | -0.936873   | 0.568244  | 1         |
| Siglece          | 0.3909   | 0.418378    | 0.0980073   | 0.8195    | 0.941524  |
| AK134755_j6      | 0.215818 | 0.0501163   | -2.10646    | 0.169885  | 0.506909  |
| AK134755_j8      | 0.109402 | 0.0164082   | -2.73714    | 0.182761  | 1         |
| AK134755_j7      | 0.157147 | 0.0441465   | -1.83174    | 0.135896  | 0.458655  |

|                  |           |                 |             |           |           |
|------------------|-----------|-----------------|-------------|-----------|-----------|
| 1700008O03Rik_j2 | 1.30701   | 0.355494        | 0           | 1         | 1         |
| 1700008O03Rik_j3 | 0.213064  | 0.0814253       | 0           | 1         | 1         |
| 2310044H10Rik_j2 | 119.994   | 113.01          | -0.0865208  | 0.353464  | 0.689952  |
| Mybpc2_j3        | 1.50751   | 1.5761          | 0.0641891   | 0.697921  | 0.888683  |
| Pold1_j1         | 0.932474  | 1.12402         | 0           | 1         | 1         |
| Pold1            | 1.14187   | 1.17054         | 0           | 1         | 1         |
| Nr1h2_j1         | 0.6107    | 0.776727        | 0           | 1         | 1         |
| Nr1h2            | 0.651223  | 0.832666        | 0           | 1         | 1         |
| Nr1h2            | 12.967    | 11.3663         | 0           | 1         | 1         |
| Myh14_j2         | 0.0597898 | 0               | 0           | 1         | 1         |
| Myh14_j1         | 6.72455   | 4.44921         | 0           | 1         | 1         |
| Atf5_j2          | 1.46713   | 1.34928         | 0           | 1         | 1         |
| Atf5             | 7.26882   | 9.2282          | 0           | 1         | 1         |
| Tbc1d17_j2       | 2.25932   | 1.53494         | 0           | 1         | 1         |
| Ptov1_j1         | 1.50957   | 1.65669         | 0           | 1         | 1         |
| Med25_j1         | 0.911616  | 1.05401         | 0           | 1         | 1         |
| Med25            | 19.7273   | 20.7506         | 0           | 1         | 1         |
| Ap2a1_j6         | 0.150205  | 0               | 0           | 1         | 1         |
| Ap2a1            | 9.88307   | 6.60819         | 0           | 1         | 1         |
| Cpt1c_j3         | 7.77358   | 6.95452         | 0           | 1         | 1         |
| Prmt1            | 2.99868   | 3.77637         | 0           | 1         | 1         |
| Prmt1            | 8.50418   | 9.36872         | 0           | 1         | 1         |
| Bcl2l12          | 0.850959  | 0.846046        | -0.00835336 | 0.968309  | 0.991047  |
| Scaf1_j5         | 2.57208   | 2.87395         | 0           | 1         | 1         |
| Scaf1_j2         | 11.2439   | 8.75993         | 0           | 1         | 1         |
| Prr12_j3         | 0.889062  | 0.919165        | 0           | 1         | 1         |
| Prr12            | 1.36263   | 0.898513        | 0           | 1         | 1         |
| Rcn3             | 5.73957   | 7.06786         | 0.300331    | 0.0734114 | 0.326393  |
| Rcn3             | 2.41836   | 2.5546          | 0.0790668   | 0.765675  | 0.919932  |
| Fcgrt            | 8.24476   | 9.25717         | 0.167094    | 0.214623  | 0.560036  |
| Rps11            | 32.8872   | 33.8583         | 0.0419842   | 0.708207  | 0.893746  |
| Rpl13a_j1        | 20.8164   | 21.8634         | 0.070793    | 0.572833  | 0.827318  |
| Rpl13a           | 0.418639  | 0.299088        | -0.48514    | 0.47959   | 0.773715  |
| Flt3l_j9         | 0.367016  | 0.371897        | 0.0190625   | 0.97465   | 0.992762  |
| Flt3l_j10        | 0.199791  | 0.0630247       | -1.6645     | 0.127866  | 0.445556  |
| Aldh16a1         | 3.65985   | 4.31787         | 0           | 1         | 1         |
| Ccdc155_j2       | 0.124004  | 0 -1.79769e+308 | 0.0031695   | 0.0031695 | 1         |
| Ccdc155_j12      | 0.0764659 | 0.0895247       | 0.227469    | 0.807232  | 1         |
| Dkk1             | 0.0326688 | 0.139608        | 2.0954      | 0.169465  | 1         |
| Cd37_j1          | 0.0396575 | 0.139577        | 1.81539     | 0.126757  | 1         |
| Cd37_j2          | 0.055288  | 0.0181781       | -1.60476    | 0.43735   | 1         |
| Ppfia3_j4        | 6.07648   | 5.93725         | 0           | 1         | 1         |
| Ppfia3           | 9.36893   | 9.32411         | 0           | 1         | 1         |
| Snrnp70          | 29.5352   | 33.8723         | 0           | 1         | 1         |
| Snrnp70          | 9.05458   | 11.4702         | 0           | 1         | 1         |
| Ruvbl2           | 5.5954    | 4.4144          | 0           | 1         | 1         |
| Ftl1             | 181.523   | 233.988         | 0.366286    | 2.19E-05  | 0.0005962 |

|                  |           |                 |            |           |           |
|------------------|-----------|-----------------|------------|-----------|-----------|
| Bax              | 8.04232   | 9.29999         | 0          | 1         | 1         |
| Bax              | 3.17392   | 2.79116         | 0          | 1         | 1         |
| Dhdh             | 1.49936   | 1.33857         | 0          | 1         | 1         |
| Nucb1_j4         | 2.84542   | 5.22395         | 0          | 1         | 1         |
| Nucb1            | 15.1503   | 12.4506         | 0          | 1         | 1         |
| Ppp1r15a         | 12.6047   | 13.6605         | 0          | 1         | 1         |
| AK049852         | 0.754149  | 0.871223        | 0.208194   | 0.351748  | 0.688957  |
| Fut2             | 0.191378  | 0.197352        | 0.0443483  | 0.891882  | 0.965687  |
| Sphk2            | 3.95412   | 2.96633         | 0          | 1         | 1         |
| Sult2b1_j3       | 0.103776  | 0 -1.79769e+308 | 0.0405059  |           | 1         |
| Sult2b1_j1       | 0.0979147 | 1.17E-05        | -13.0334   | 0.995142  | 1         |
| Cyth2            | 10.3899   | 16.9516         | 0          | 1         | 1         |
| Cyth2_j2         | 12.7853   | 12.734          | 0          | 1         | 1         |
| Grwd1_j2         | 1.24845   | 1.64392         | 0.397009   | 0.369654  | 0.703078  |
| Grwd1            | 0.345469  | 0.374855        | 0.117774   | 0.808496  | 0.937072  |
| Grin2d_j2        | 0.24492   | 0.0126917       | -4.27035   | 0.199712  | 0.542763  |
| Grin2d           | 0.0234229 | 0.181901        | 2.95716    | 0.0187448 | 0.134881  |
| Syng4_j1         | 8.59893   | 11.4133         | 0          | 1         | 1         |
| Emp3             | 4.38492   | 6.09197         | 0          | 1         | 1         |
| Kcnj11           | 2.37919   | 1.20249         | -0.984446  | 7.96E-06  | 0.0002536 |
| Abcc8_j2         | 2.58244   | 1.56713         | -0.720608  | 4.71E-06  | 0.0001602 |
| Abcc8_j1         | 0.344537  | 0.0488183       | -2.81916   | 0.0005733 | 0.00914   |
| Sergef           | 1.25076   | 1.28951         | 0.0440223  | 0.81801   | 0.940957  |
| Sergef_j2        | 0.202998  | 0.105757        | -0.940717  | 0.378993  | 0.710523  |
| Saal1            | 0.496824  | 0.475321        | -0.0638318 | 0.777896  | 0.924945  |
| Hps5             | 0.079499  | 0.0183992       | 0          | 1         | 1         |
| Hps5_j4          | 0.674749  | 0.446506        | 0          | 1         | 1         |
| Tsg101_j4        | 10.8994   | 11.4639         | 0.0728444  | 0.602649  | 0.84309   |
| Uevld_j4         | 0.0800413 | 0.0568716       | -0.493037  | 0.733947  | 1         |
| Spty2d1          | 3.38524   | 3.0106          | -0.169209  | 0.188094  | 0.52933   |
| Ptpn5            | 0.843356  | 1.48402         | 0          | 1         | 1         |
| Ptpn5            | 0.302712  | 0.476472        | 0          | 1         | 1         |
| XLOC_030426      | 0.0894024 | 0.105723        | 0.241906   | 0.731987  | 1         |
| Mrgpra9          | 0.372112  | 0.554117        | 0          | 1         | 1         |
| XLOC_030427      | 4.02782   | 2.36679         | 0          | 1         | 1         |
| Mrgprx1_j2       | 0.24466   | 0.163186        | -0.584267  | 0.148586  | 0.477445  |
| Mrgprx1          | 5.27349   | 5.46178         | 0.0506155  | 0.663766  | 0.872653  |
| Svip             | 27.8975   | 21.9561         | -0.345511  | 0.0003466 | 0.0060062 |
| Nipa2            | 1.68287   | 1.52276         | -0.144231  | 0.316908  | 0.660306  |
| Nipa1            | 18.6716   | 16.4767         | -0.180413  | 0.0421972 | 0.232106  |
| Snrpn_j8         | 3.95969   | 4.06624         | 0          | 1         | 1         |
| Snrpn_j9         | 1.96322   | 1.78394         | 0          | 1         | 1         |
| XLOC_030460      | 0.129285  | 0 -1.79769e+308 | 0.0007253  |           | 1         |
| XLOC_030460      | 0.0519012 | 0.000561364     | -6.53069   | 0.616856  | 1         |
| DOKist4_j1       | 0.241277  | 0.0833305       | -1.53377   | 0.25098   | 0.598849  |
| A230057D06Rik_j1 | 0.280379  | 0.268841        | -0.0606266 | 0.875263  | 0.960277  |
| AK086712_j1      | 0.362668  | 0.145468        | -1.31795   | 0.0566566 | 0.278449  |

|              |           |                 |            |           |           |
|--------------|-----------|-----------------|------------|-----------|-----------|
| AK086712_j2  | 0.100901  | 1.36E-05        | -12.8553   | 0.993886  | 1         |
| AK086712_j3  | 0.0555449 | 0.0820209       | 0.562336   | 0.674176  | 1         |
| Mkrn3        | 0.355508  | 0.388431        | 0.127779   | 0.68893   | 0.88458   |
| Chrna7       | 11.0171   | 7.94319         | 0          | 1         | 1         |
| Klf13_j2     | 17.3697   | 22.3526         | 0.363869   | 5.13E-05  | 0.0012189 |
| Klf13        | 2.75427   | 2.83453         | 0.0414412  | 0.778751  | 0.925532  |
| Fan1         | 0.653393  | 0.448232        | -0.543706  | 0.0522534 | 0.265401  |
| Mphosph10_j1 | 4.42801   | 4.83901         | 0.128054   | 0.414543  | 0.732858  |
| Fam189a1     | 0.984792  | 0.548211        | -0.845087  | 0.0007502 | 0.011381  |
| Tjp1_j6      | 0.215064  | 0 -1.79769e+308 |            | 4.77E-08  | 2.82E-06  |
| Tjp1         | 1.32406   | 0.890419        | -0.57241   | 0.0062079 | 0.0601524 |
| Tjp1_j5      | 1.58455   | 0.873209        | -0.859677  | 3.71E-05  | 0.0009251 |
| XLOC_030477  | 0.212445  | 0.11274         | -0.914086  | 0.200489  | 0.543845  |
| Lrrk1        | 0.292517  | 0.104629        | -1.48324   | 0.0007591 | 0.011481  |
| Aldh1a3      | 0.467511  | 0.0897952       | -2.38029   | 0.0001021 | 0.0021968 |
| Asb7_j2      | 0.670093  | 0.422683        | 0          | 1         | 1         |
| Asb7         | 0.624806  | 0.632243        | 0          | 1         | 1         |
| XLOC_030481  | 0.172238  | 0.166755        | -0.0466732 | 0.938929  | 0.981348  |
| AK038598_j1  | 0.113245  | 0.0396184       | -1.51521   | 0.160325  | 1         |
| AK038598_j5  | 0.197747  | 0.0305203       | -2.69581   | 0.0538179 | 0.270332  |
| AK038598_j2  | 0.117269  | 0.0923691       | -0.34434   | 0.718343  | 1         |
| AK038598_j9  | 0.091321  | 0.0983844       | 0.107483   | 0.921313  | 1         |
| Mef2a_j8     | 2.5415    | 1.18908         | 0          | 1         | 1         |
| Mef2a        | 0.1616    | 0.323081        | 0          | 1         | 1         |
| Lrrc28       | 4.07623   | 3.7629          | 0          | 1         | 1         |
| Sym_j3       | 13.5729   | 12.4545         | 0          | 1         | 1         |
| Sym          | 5.75102   | 4.56679         | 0          | 1         | 1         |
| AK014683_j1  | 0.153611  | 0.177722        | 0.210334   | 0.785917  | 0.928311  |
| Arrdc4       | 5.13698   | 6.48785         | 0.336821   | 0.0045904 | 0.0476131 |
| Arrdc4       | 3.56754   | 2.21626         | -0.686799  | 0.0193509 | 0.137777  |
| AK049871     | 0.343022  | 0.300994        | -0.188564  | 0.682896  | 0.881225  |
| AK049871_j2  | 0.226856  | 0.108163        | -1.06857   | 0.309352  | 0.654043  |
| Nr2f2_j1     | 0.0655727 | 0.108622        | 0.728148   | 0.410107  | 1         |
| Nr2f2        | 3.32491   | 3.59094         | 0.111047   | 0.485133  | 0.776871  |
| Mctp2_j7     | 0.248767  | 0.110819        | 0          | 1         | 1         |
| Mctp2_j3     | 1.14028   | 0.710515        | 0          | 1         | 1         |
| Mctp2        | 1.16409   | 0.565325        | 0          | 1         | 1         |
| Gm10294      | 141.402   | 169.351         | 0.260213   | 0.0044296 | 0.0464189 |
| Chd2_j5      | 0.125705  | 0.0770606       | -0.70598   | 0.194457  | 1         |
| Chd2_j6      | 0.132427  | 0.0801509       | -0.724406  | 0.158264  | 1         |
| Chd2_j7      | 0.655632  | 0.465676        | -0.493561  | 0.0200855 | 0.141224  |
| Slco3a1      | 13.7811   | 13.2819         | -0.0532305 | 0.613226  | 0.847467  |
| Sv2b_j4      | 13.7874   | 14.1985         | 0          | 1         | 1         |
| Sv2b         | 30.1486   | 19.8241         | 0          | 1         | 1         |
| Sv2b         | 8.50073   | 4.41861         | 0          | 1         | 1         |
| XLOC_030503  | 0.156937  | 0.0270075       | -2.53875   | 0.207267  | 0.551757  |
| Ntrk3_j5     | 1.09695   | 1.20189         | 0          | 1         | 1         |



|                  |          |           |               |           |           |
|------------------|----------|-----------|---------------|-----------|-----------|
| E430016F16Rik_j5 | 0.181472 | 0         | -1.79769e+308 | 3.94E-06  | 0.0001377 |
| E430016F16Rik_j6 | 0.192252 | 0         | -1.79769e+308 | 1.52E-06  | 5.93E-05  |
| E430016F16Rik_j8 | 0.22977  | 0         | -1.79769e+308 | 6.84E-08  | 3.89E-06  |
| E430016F16Rik_j4 | 0.377022 | 8.15E-05  | -12.175       | 0.838775  | 0.948621  |
| Mrpl46           | 7.00882  | 6.50994   | -0.106529     | 0.547835  | 0.813886  |
| Det1_j6          | 0.375987 | 0.13051   | -1.52652      | 0.006969  | 0.0656472 |
| Hapln3_j1        | 0.286459 | 0         | -1.79769e+308 | 1.30E-07  | 6.79E-06  |
| Hapln3           | 0.3674   | 0.275746  | -0.414014     | 0.286417  | 0.635237  |
| Mfge8            | 3.76187  | 4.66053   | 0             | 1         | 1         |
| Rlbp1_j2         | 0.207369 | 0.1719    | 0             | 1         | 1         |
| Rlbp1            | 1.41068  | 1.40702   | 0             | 1         | 1         |
| Polg             | 0.884475 | 0.715171  | 0             | 1         | 1         |
| Kif7             | 0.243533 | 0.258409  | 0.0855413     | 0.865444  | 0.957089  |
| Kif7_j4          | 0.123711 | 0.0738787 | -0.743739     | 0.342225  | 1         |
| Kif7_j5          | 0.126653 | 0.061826  | -1.03459      | 0.245855  | 1         |
| Kif7_j6          | 0.101308 | 0.0328234 | -1.62596      | 0.119362  | 1         |
| Pex11a           | 1.46746  | 1.11351   | 0             | 1         | 1         |
| Pex11a           | 2.12668  | 1.441     | 0             | 1         | 1         |
| Anpep            | 0.222344 | 0.165613  | -0.424976     | 0.439731  | 0.749296  |
| ldh2_j3          | 2.93427  | 3.10746   | 0             | 1         | 1         |
| ldh2             | 2.76667  | 3.34209   | 0             | 1         | 1         |
| Cib1             | 4.4755   | 5.54055   | 0             | 1         | 1         |
| Unc45a_j2        | 1.0118   | 0.988433  | 0             | 1         | 1         |
| Man2a2_j3        | 0.402209 | 0.37908   | 0             | 1         | 1         |
| Fes_j3           | 0.212061 | 0.371918  | 0.810505      | 0.335153  | 0.675781  |
| Fes              | 0.321245 | 0.390705  | 0.282405      | 0.468576  | 0.767143  |
| Furin_j3         | 5.23966  | 5.92524   | 0             | 1         | 1         |
| Furin            | 3.72028  | 2.72081   | 0             | 1         | 1         |
| Blm              | 0.220538 | 0         | -1.79769e+308 | 2.86E-12  | 3.81E-10  |
| Crtc3            | 2.94525  | 2.50522   | 0             | 1         | 1         |
| lqgap1_j3        | 1.57627  | 2.13997   | 0             | 1         | 1         |
| lqgap1_j4        | 2.15613  | 2.38721   | 0             | 1         | 1         |
| lqgap1           | 0.857027 | 1.04724   | 0             | 1         | 1         |
| lqgap1_j2        | 2.02466  | 1.97203   | 0             | 1         | 1         |
| Sec11a           | 11.9888  | 12.4422   | 0.0535526     | 0.697677  | 0.888632  |
| XLOC_030530      | 0.131087 | 0         | -1.79769e+308 | 0.0095179 | 1         |
| XLOC_030530      | 0.31301  | 0.114272  | -1.45373      | 0.117461  | 0.426424  |
| XLOC_030530      | 0.371061 | 0.305312  | -0.281373     | 0.438814  | 0.748467  |
| Gm7180           | 71.222   | 67.2558   | -0.0826644    | 0.462778  | 0.763401  |
| Cpeb1_j1         | 3.51249  | 1.64465   | 0             | 1         | 1         |
| Ap3b2            | 47.3194  | 49.149    | 0             | 1         | 1         |
| Homer2           | 1.78465  | 2.11622   | 0             | 1         | 1         |
| Homer2           | 2.69587  | 2.074     | 0             | 1         | 1         |
| vesl-2_j1        | 0.646903 | 0.111219  | 0             | 1         | 1         |
| 3110040N11Rik_j1 | 0.737059 | 0.957368  | 0.377294      | 0.297389  | 0.643979  |
| 3110040N11Rik    | 2.74961  | 2.15534   | -0.351315     | 0.194545  | 0.536807  |
| Btbd1_j6         | 2.83913  | 1.73638   | -0.709372     | 0.0044588 | 0.0466149 |

|                  |           |           |            |           |           |
|------------------|-----------|-----------|------------|-----------|-----------|
| Hdgfrp3_j2       | 2.16446   | 2.29924   | 0          | 1         | 1         |
| Fam154b_j1       | 0.0896273 | 0.0892359 | 0          | 1         | 1         |
| AK042300_j1      | 0.3526    | 0.221888  | 0          | 1         | 1         |
| AK042300_j2      | 0.272703  | 0.198241  | 0          | 1         | 1         |
| Il16_j4          | 0.220671  | 0.046086  | -2.2595    | 0.0076563 | 0.0704465 |
| Il16_j2          | 0.331221  | 0.31367   | -0.0785471 | 0.763228  | 0.918454  |
| 9930013L23Rik_j5 | 0.460743  | 0.561252  | 0.284688   | 0.405247  | 0.726998  |
| 9930013L23Rik    | 0.279006  | 0.177062  | -0.656038  | 0.091103  | 0.371031  |
| Fam108c          | 9.90885   | 11.2436   | 0.182315   | 0.117072  | 0.425436  |
| Arnt2_j1         | 0.773402  | 0.220037  | 0          | 1         | 1         |
| Arnt2            | 4.8178    | 5.89803   | 0          | 1         | 1         |
| Fah_j4           | 5.53355   | 5.45959   | 0          | 1         | 1         |
| Zfand6           | 13.7158   | 12.875    | 0          | 1         | 1         |
| Folh1_j3         | 0.626482  | 0.438389  | 0          | 1         | 1         |
| Folh1            | 0.833647  | 1.26027   | 0          | 1         | 1         |
| Folh1            | 1.35566   | 1.57427   | 0          | 1         | 1         |
| Tmem135_j3       | 9.15178   | 6.37354   | 0          | 1         | 1         |
| Tmem135          | 13.2197   | 11.3303   | 0          | 1         | 1         |
| Prss23           | 2.75607   | 3.71786   | 0          | 1         | 1         |
| Prss23_j1        | 0.84947   | 0.673644  | 0          | 1         | 1         |
| I7Rn6            | 6.66838   | 6.52947   | -0.0303693 | 0.796267  | 0.932066  |
| Eed              | 3.03962   | 3.43578   | 0.176748   | 0.257985  | 0.606629  |
| Ccdc83_j1        | 0.253724  | 0.0913456 | -1.47385   | 0.122585  | 0.4357    |
| Tmem126a         | 2.26202   | 2.30321   | 0          | 1         | 1         |
| Tmem126b         | 9.15772   | 8.74348   | -0.0667805 | 0.542406  | 0.810216  |
| Ankrd42_j1       | 0.0993421 | 0.0604343 | -0.717037  | 0.367119  | 1         |
| Ankrd42_j5       | 1.44205   | 1.54403   | 0.0985816  | 0.733633  | 0.906044  |
| 4632434I11Rik    | 0.277699  | 0.236886  | 0          | 1         | 1         |
| Usp35            | 17.1236   | 17.5633   | 0          | 1         | 1         |
| Usp35_j1         | 7.01908   | 5.01125   | 0          | 1         | 1         |
| Thrsp            | 10.5432   | 5.55436   | -0.924616  | 3.75E-11  | 4.17E-09  |
| 1810020D17Rik    | 11.4751   | 10.4146   | -0.139895  | 0.435394  | 0.74624   |
| Aqp11            | 2.69849   | 2.47438   | -0.125085  | 0.406543  | 0.727764  |
| Myo7a_j8         | 0.285544  | 0.115185  | -1.30976   | 0.0917077 | 0.372123  |
| Myo7a_j10        | 0.251034  | 0.528171  | 1.07312    | 0.0001402 | 0.0028416 |
| Myo7a_j9         | 0.0676408 | 0.0452053 | -0.581402  | 0.429025  | 1         |
| Capn5_j1         | 26.6389   | 31.6785   | 0          | 1         | 1         |
| Capn5            | 4.03598   | 2.15873   | 0          | 1         | 1         |
| Capn5_j5         | 0.580608  | 0.457786  | 0          | 1         | 1         |
| B3gnt6           | 0.351668  | 0.38003   | 0.111898   | 0.769782  | 0.921491  |
| Acer3            | 3.26785   | 2.93421   | -0.155369  | 0.198507  | 0.541655  |
| 2210018M11Rik_j8 | 1.11407   | 1.06511   | 0          | 1         | 1         |
| AK052909         | 0.183711  | 0.141236  | -0.379328  | 0.660209  | 0.871049  |
| Uvrag_j1         | 3.34995   | 3.70003   | 0          | 1         | 1         |
| Uvrag            | 5.96131   | 4.08351   | 0          | 1         | 1         |
| Dgat2_j2         | 1.47457   | 2.87688   | 0.964214   | 0.0001826 | 0.0035575 |
| Dgat2            | 6.3659    | 7.21689   | 0.181013   | 0.191415  | 0.53358   |

|                  |           |                 |            |           |           |
|------------------|-----------|-----------------|------------|-----------|-----------|
| Serpinh1         | 14.5204   | 18.1366         | 0          | 1         | 1         |
| Rps3             | 15.5336   | 19.5035         | 0.328342   | 0.0028663 | 0.0332157 |
| Slco2b1_j3       | 0.188674  | 0.285856        | 0.59939    | 0.325766  | 0.669036  |
| Slco2b1          | 0.205658  | 0.00491079      | -5.38815   | 0.0463484 | 0.246859  |
| Slco2b1          | 0.783455  | 1.59939         | 1.0296     | 9.88E-07  | 4.09E-05  |
| Neu3_j1          | 0.0471673 | 0.0378232       | -0.318514  | 0.748116  | 1         |
| Neu3_j3          | 0.0319233 | 0.0617385       | 0.951561   | 0.287892  | 1         |
| Spcs2            | 21.2276   | 21.2453         | 0.00120295 | 0.991761  | 0.997561  |
| Rnf169_j3        | 0.111011  | 0.0553753       | 0          | 1         | 1         |
| Rnf169_j2        | 0.463065  | 0.0414647       | 0          | 1         | 1         |
| Pold3            | 1.65365   | 1.2606          | 0          | 1         | 1         |
| Ppme1            | 49.9575   | 51.6604         | 0          | 1         | 1         |
| Dnajb13_j4       | 0.0753859 | 0.0271004       | -1.47598   | 0.349637  | 1         |
| Plekhb1_j3       | 2.90427   | 2.2704          | 0          | 1         | 1         |
| Plekhb1          | 36.2028   | 37.9147         | 0          | 1         | 1         |
| Relt_j7          | 3.29574   | 1.82506         | 0          | 1         | 1         |
| Arhgef17         | 9.62542   | 7.65037         | -0.331319  | 0.0010085 | 0.014411  |
| P2ry6            | 0.421549  | 0.567813        | 0.429714   | 0.269517  | 0.618722  |
| P2ry2            | 0.404804  | 0.670726        | 0          | 1         | 1         |
| P2ry2_j1         | 0.159097  | 0.0296353       | 0          | 1         | 1         |
| Gm7027           | 22.2121   | 24.6064         | 0.147693   | 0.225353  | 0.572449  |
| Inpp1_j6         | 1.20437   | 1.02342         | 0          | 1         | 1         |
| Inpp1            | 1.38422   | 1.04757         | 0          | 1         | 1         |
| Folr2            | 0.0646597 | 0.278601        | 2.10726    | 0.0164399 | 0.122755  |
| Rnf121_j1        | 0.713831  | 0.697643        | 0          | 1         | 1         |
| Chrna10_j4       | 0.0468786 | 0 -1.79769e+308 | 0.0532731  |           | 1         |
| Chrna10          | 0.221947  | 0.215944        | -0.0395609 | 0.936918  | 0.980715  |
| Chrna10_j5       | 0.164248  | 0.0342241       | -2.26279   | 0.0292006 | 0.182342  |
| Nup98_j3         | 0.247573  | 0.187837        | 0          | 1         | 1         |
| Nup98_j4         | 2.05705   | 1.01908         | 0          | 1         | 1         |
| Nup98_j5         | 2.96414   | 1.68641         | 0          | 1         | 1         |
| Rhog             | 2.58243   | 2.81118         | 0          | 1         | 1         |
| Trim21_j1        | 0.811781  | 0.612701        | -0.405906  | 0.282811  | 0.631354  |
| Trim21           | 1.47659   | 1.70037         | 0.203577   | 0.323549  | 0.666591  |
| Trim68_j4        | 0.146412  | 0.169053        | 0.207446   | 0.774588  | 0.923737  |
| Trim68           | 1.62041   | 0.887072        | -0.869237  | 0.003682  | 0.0405203 |
| Olfr78_j1        | 0.0925133 | 0.0709743       | -0.382365  | 0.685924  | 1         |
| Beta-s           | 76.8624   | 99.8749         | 0.377844   | 0.0001055 | 0.0022573 |
| Trim5_j1         | 0.137498  | 0.11906         | -0.207718  | 0.820808  | 0.942018  |
| Trim12a_j1       | 0.307738  | 0.157496        | -0.966389  | 0.18795   | 0.529074  |
| 9230105E10Rik    | 0.479089  | 0.674986        | 0.494566   | 0.173564  | 0.511435  |
| 9230105E10Rik_j3 | 0.588622  | 0.397104        | -0.567824  | 0.16101   | 0.495756  |
| Trim30a_j4       | 0.0876887 | 0.109551        | 0.321139   | 0.67872   | 1         |
| Trim30a_j8       | 0.352105  | 0.243667        | -0.531097  | 0.332085  | 0.6735    |
| Gm16464          | 1.76379   | 2.05771         | 0.222359   | 0.325793  | 0.669036  |
| Fam160a2_j2      | 0.128594  | 0 -1.79769e+308 |            | 1.99E-09  | 1         |
| Fam160a2         | 1.11658   | 1.64101         | 0.555492   | 0.0003551 | 0.0061227 |

|            |           |                 |             |           |          |
|------------|-----------|-----------------|-------------|-----------|----------|
| Prkcdbp    | 11.3814   | 21.1292         | 0.892558    | 5.31E-13  | 7.91E-11 |
| Apbb1_j6   | 0.20888   | 0.0438496       | 0           | 1         | 1        |
| Apbb1      | 4.11331   | 2.60229         | 0           | 1         | 1        |
| Apbb1_j7   | 19.0826   | 35.0171         | 0           | 1         | 1        |
| Trim3      | 16.661    | 20.6435         | 0           | 1         | 1        |
| Trim3      | 8.12872   | 7.01114         | 0           | 1         | 1        |
| Arfip2     | 1.84575   | 2.77919         | 0           | 1         | 1        |
| Tpp1       | 15.2422   | 15.4516         | 0.0196937   | 0.840859  | 0.94973  |
| Mrpl17_j1  | 16.845    | 16.8881         | 0.00369111  | 0.985399  | 0.995689 |
| Mrpl17     | 25.6096   | 26.1007         | 0.0274037   | 0.820042  | 0.941761 |
| Cyb5r2     | 0.128793  | 0.303249        | 1.23545     | 0.0572301 | 0.280348 |
| Cyb5r2_j2  | 0.0850858 | 0.114262        | 0.425349    | 0.52101   | 1        |
| Ric3       | 0.0513576 | 0.0689355       | 0           | 1         | 1        |
| Ric3       | 3.58785   | 3.29277         | 0           | 1         | 1        |
| Lmo1_j1    | 0.760138  | 0.453066        | 0           | 1         | 1        |
| Lmo1_j2    | 2.25761   | 2.54468         | 0           | 1         | 1        |
| Lmo1_j3    | 8.32356   | 9.04312         | 0           | 1         | 1        |
| St5_j1     | 1.61858   | 2.0557          | 0           | 1         | 1        |
| St5        | 1.07516   | 0.978572        | 0           | 1         | 1        |
| St5_j2     | 0.102058  | 0.230926        | 0           | 1         | 1        |
| Tmem9b     | 36.3147   | 36.3241         | 0.000371545 | 0.996816  | 0.999085 |
| Nrip3_j2   | 0.415004  | 1.0274          | 0           | 1         | 1        |
| Nrip3      | 30.2677   | 26.5007         | 0           | 1         | 1        |
| Scube2_j2  | 0.0994693 | 0.0684738       | -0.538698   | 0.591586  | 1        |
| Dennd5a_j3 | 8.33834   | 9.70368         | 0           | 1         | 1        |
| Dennd5a    | 9.36054   | 10.6289         | 0           | 1         | 1        |
| Dennd5a    | 8.15641   | 6.61554         | 0           | 1         | 1        |
| Tmem41b_j3 | 0.223028  | 0 -1.79769e+308 | 0.0001623   | 0.0032248 |          |
| Sbf2       | 2.29549   | 2.91259         | 0           | 1         | 1        |
| Sbf2_j5    | 0.219863  | 0.142781        | 0           | 1         | 1        |
| Sbf2_j4    | 0.340228  | 0.061797        | 0           | 1         | 1        |
| Rnf141_j2  | 0.0754152 | 0.151486        | 0           | 1         | 1        |
| Lyve1      | 1.0318    | 1.00612         | -0.036351   | 0.8797    | 0.961537 |
| Mrvi1_j4   | 0.267589  | 0.164129        | -0.705186   | 0.0815338 | 0.347847 |
| Mrvi1_j3   | 0.0604981 | 0 -1.79769e+308 | 0.0009278   | 1         |          |
| Eif4g2_j7  | 78.354    | 95.741          | 0           | 1         | 1        |
| Eif4g2     | 0.0903484 | 0.140409        | 0           | 1         | 1        |
| Galntl4_j4 | 0.12992   | 0               | 0           | 1         | 1        |
| Galntl4_j5 | 1.05682   | 0               | 0           | 1         | 1        |
| Galntl4    | 7.9492    | 8.39778         | 0           | 1         | 1        |
| Dkk3_j3    | 12.152    | 9.05835         | 0           | 1         | 1        |
| Dkk3       | 14.1123   | 10.7544         | 0           | 1         | 1        |
| Btbd10_j2  | 1.92248   | 3.60474         | 0           | 1         | 1        |
| Btbd10     | 7.81461   | 7.31158         | 0           | 1         | 1        |
| Btbd10_j1  | 2.83962   | 3.67678         | 0           | 1         | 1        |
| Rras2      | 0.711686  | 0.974976        | 0.454125    | 0.0622171 | 0.295391 |
| Copb1      | 19.7181   | 19.1184         | -0.0445613  | 0.640026  | 0.860827 |

|               |           |                 |             |           |           |
|---------------|-----------|-----------------|-------------|-----------|-----------|
| Psma1_j1      | 68.2661   | 69.9407         | 0.034964    | 0.723938  | 0.901782  |
| Psma1         | 31.6825   | 33.0468         | 0.0608226   | 0.573102  | 0.827416  |
| XLOC_030665   | 0.308987  | 0.30821         | -0.00363192 | 0.994276  | 0.998373  |
| Calca_j1      | 467.643   | 503.026         | 0           | 1         | 1         |
| Calca_j2      | 449.064   | 467.677         | 0           | 1         | 1         |
| Sox6_j3       | 0.115515  | 0.0644831       | -0.841086   | 0.163482  | 1         |
| Gm4353        | 6.40429   | 7.95088         | 0.312078    | 0.0457987 | 0.24486   |
| Plekha7_j1    | 0.193877  | 0 -1.79769e+308 |             | 5.16E-08  | 3.02E-06  |
| Plekha7_j2    | 0.15313   | 0.0644184       | -1.24922    | 0.0690387 | 0.314999  |
| Plekha7_j10   | 0.440192  | 0.131778        | -1.74002    | 0.0008457 | 0.0125217 |
| Rps13_j2      | 1.19927   | 1.10812         | -0.114043   | 0.675785  | 0.877932  |
| Pik3c2a       | 1.18624   | 0.893192        | -0.409357   | 0.0339475 | 0.201735  |
| Pik3c2a_j2    | 0.249296  | 0 -1.79769e+308 |             | 1.01E-12  | 1.44E-10  |
| Rps15a_j5     | 0.564037  | 0.358545        | 0           | 1         | 1         |
| Rps15a_j2     | 0.217559  | 0.25554         | 0           | 1         | 1         |
| Arl6ip1       | 168.257   | 161.636         | 0           | 1         | 1         |
| Syt17         | 0.175028  | 0.0854009       | -1.03527    | 0.231397  | 0.578474  |
| Syt17         | 0.342968  | 0.32804         | -0.0642033  | 0.886014  | 0.963781  |
| Syt17_j2      | 0.309828  | 0.345186        | 0.155904    | 0.709213  | 0.894136  |
| Itpripl2      | 2.06633   | 2.8654          | 0.471661    | 0.0001796 | 0.0035102 |
| Coq7          | 20.4475   | 19.8927         | -0.0396885  | 0.76289   | 0.918329  |
| Tmc7          | 2.9724    | 4.2411          | 0           | 1         | 1         |
| Gde1_j5       | 6.77545   | 16.0221         | 0           | 1         | 1         |
| Gde1          | 29.1806   | 35.1976         | 0           | 1         | 1         |
| 2310008H09Rik | 0.147917  | 0.12247         | 0           | 1         | 1         |
| Gprc5b_j1     | 8.65604   | 5.69982         | 0           | 1         | 1         |
| Gprc5b        | 3.2877    | 1.23244         | 0           | 1         | 1         |
| Gprc5b        | 9.65432   | 6.05165         | 0           | 1         | 1         |
| Gpr139_j1     | 2.41504   | 2.28071         | 0           | 1         | 1         |
| Gpr139        | 1.43501   | 1.09469         | 0           | 1         | 1         |
| XLOC_030686   | 0.0882815 | 0 -1.79769e+308 |             | 0.0156202 | 1         |
| Thumpd1       | 13.4795   | 14.87           | 0.141641    | 0.170624  | 0.507473  |
| Eri2_j4       | 0.187026  | 0.15197         | -0.299451   | 0.631225  | 0.8565    |
| Eri2          | 0.107599  | 0.0381728       | -1.49505    | 0.212154  | 1         |
| Eri2          | 0.400371  | 0.306708        | -0.38447    | 0.365264  | 0.699065  |
| Dcun1d3       | 0.440803  | 0.358791        | -0.296993   | 0.245545  | 0.592921  |
| Crym_j1       | 4.64074   | 5.4502          | 0.231954    | 0.277311  | 0.626359  |
| Crym          | 3.94205   | 4.22069         | 0.0985316   | 0.623428  | 0.85284   |
| Cdr2          | 25.6849   | 26.6353         | 0.0524184   | 0.576515  | 0.829044  |
| Usp31         | 2.89781   | 1.7668          | 0           | 1         | 1         |
| Cog7          | 12.4408   | 12.3638         | -0.00895309 | 0.931875  | 0.979283  |
| Gga2          | 25.7571   | 30.182          | 0.228719    | 0.0084438 | 0.075552  |
| Ndufab1_j1    | 0.889179  | 1.07905         | 0           | 1         | 1         |
| Ndufab1_j3    | 1.3548    | 0.766304        | 0           | 1         | 1         |
| Ndufab1_j4    | 0.059983  | 0               | 0           | 1         | 1         |
| Palb2_j4      | 0.0845746 | 0 -1.79769e+308 |             | 0.0420498 | 1         |
| Palb2_j6      | 0.0796791 | 0 -1.79769e+308 |             | 0.0538927 | 1         |

|                  |           |             |               |           |           |
|------------------|-----------|-------------|---------------|-----------|-----------|
| Palb2_j5         | 0.147629  | 0           | -1.79769e+308 | 0.009722  | 0.0838932 |
| Ern2_j2          | 0.053792  | 0.0312618   | -0.782989     | 0.497987  | 1         |
| Ern2_j1          | 0.135843  | 0.0308198   | -2.14002      | 0.0457044 | 1         |
| Arhgap17         | 0.156977  | 0.245933    | 0             | 1         | 1         |
| Zkscan2_j2       | 0.306719  | 0.410797    | 0.421509      | 0.227172  | 0.574393  |
| Zkscan2_j3       | 0.0674043 | 0           | -1.79769e+308 | 0.0010053 | 1         |
| Zkscan2_j4       | 0.320366  | 0.204528    | -0.647419     | 0.0624849 | 0.295796  |
| Nsmce1_j2        | 0.806923  | 0.000292567 | -11.4294      | 0.889119  | 0.964761  |
| Nsmce1           | 0.988271  | 0.979959    | -0.0121863    | 0.968622  | 0.9911    |
| Gtf3c1_j4        | 9.86154   | 12.2908     | 0             | 1         | 1         |
| Gtf3c1           | 8.63637   | 7.35601     | 0             | 1         | 1         |
| Gsg1l            | 1.48732   | 1.4509      | -0.0357639    | 0.849729  | 0.952228  |
| Xpo6_j1          | 0.26928   | 0.185485    | 0             | 1         | 1         |
| Spns1            | 8.78991   | 8.7967      | 0.00111376    | 0.992791  | 0.997911  |
| Sh2b1_j4         | 1.2212    | 0.928695    | 0             | 1         | 1         |
| Sh2b1            | 2.08699   | 4.76401     | 0             | 1         | 1         |
| Sh2b1            | 5.18323   | 1.58628     | 0             | 1         | 1         |
| Atxn2l_j11       | 0.513061  | 1.05779     | 0             | 1         | 1         |
| Atxn2l_j3        | 4.56876   | 3.15904     | 0             | 1         | 1         |
| Eif3c_j2         | 33.3739   | 39.5966     | 0             | 1         | 1         |
| Eif3c            | 16.2211   | 15.8576     | 0             | 1         | 1         |
| Cln3_j7          | 0.304765  | 0.0747442   | -2.02766      | 0.112963  | 0.418375  |
| Nupr1            | 2.25342   | 3.1811      | 0.497412      | 0.0605993 | 0.290199  |
| Coro1a_j2        | 0.169193  | 0.246539    | 0.543142      | 0.0621682 | 0.295234  |
| Coro1a_j9        | 1.30538   | 1.21221     | -0.106828     | 0.787977  | 0.929394  |
| Ppp4c            | 20.0275   | 22.7526     | 0.184048      | 0.112808  | 0.418089  |
| Aldoa_j5         | 0.745552  | 0.498412    | 0             | 1         | 1         |
| Aldoa            | 78.152    | 77.4981     | 0             | 1         | 1         |
| Taok2_j1         | 0.569116  | 0.599073    | 0.0740087     | 0.739972  | 0.90886   |
| Taok2            | 11.4986   | 12.3352     | 0.101328      | 0.311714  | 0.656276  |
| Mvp_j1           | 0.4708    | 0.680257    | 0             | 1         | 1         |
| Mvp_j2           | 0.807437  | 0.773695    | 0             | 1         | 1         |
| Mvp_j3           | 0.573362  | 0.764836    | 0             | 1         | 1         |
| Qprt             | 1.61638   | 1.25425     | -0.365943     | 0.147275  | 0.475869  |
| Cd2bp2_j2        | 10.8276   | 10.49       | 0             | 1         | 1         |
| Cd2bp2_j5        | 0.292466  | 0           | 0             | 1         | 1         |
| Cd2bp2_j6        | 1.30871   | 1.82119     | 0             | 1         | 1         |
| Cd2bp2           | 1.70209   | 0.87609     | 0             | 1         | 1         |
| Tbc1d10b_j1      | 0.747304  | 0.308528    | -1.27629      | 0.0140211 | 0.109598  |
| Tbc1d10b         | 18.652    | 19.0118     | 0.0275614     | 0.77685   | 0.924603  |
| Dctpp1           | 7.03117   | 7.94086     | 0.17553       | 0.321696  | 0.664798  |
| Sephs2           | 8.89474   | 7.63416     | -0.220483     | 0.0548652 | 0.273143  |
| Zfp768           | 0.758989  | 0.735954    | -0.0444623    | 0.867725  | 0.958158  |
| Zfp747           | 0.690669  | 0.886087    | 0.359453      | 0.225756  | 0.572899  |
| 9130019O22Rik_j1 | 0.116797  | 0.132841    | 0.185694      | 0.724697  | 1         |
| E430018J23Rik    | 0.648384  | 0.302595    | -1.09946      | 0.0242838 | 0.161084  |
| Zfp764_j1        | 0.775535  | 0.75969     | -0.0297807    | 0.932631  | 0.979591  |

|                  |           |                 |            |           |           |
|------------------|-----------|-----------------|------------|-----------|-----------|
| Zfp689           | 1.23549   | 1.03468         | -0.255898  | 0.184279  | 0.524798  |
| Gm166_j1         | 0.0528929 | 0 -1.79769e+308 |            | 0.0005627 | 1         |
| Zfp629_j2        | 0.334685  | 0 -1.79769e+308 |            | 4.36E-13  | 6.58E-11  |
| Zfp629_j3        | 0.199791  | 0.416262        | 1.059      | 0.0565039 | 0.27814   |
| Zfp629           | 0.606008  | 0.480856        | -0.33373   | 0.23703   | 0.583799  |
| Stx1b_j1         | 21.2681   | 20.2102         | 0          | 1         | 1         |
| Stx1b            | 0.608973  | 0.616342        | 0          | 1         | 1         |
| Stx1b_j2         | 32.9777   | 26.0635         | 0          | 1         | 1         |
| Prss53_j3        | 0.114816  | 0.077628        | -0.564675  | 0.151672  | 1         |
| Vkorc1           | 2.55063   | 2.85078         | 0.160505   | 0.358181  | 0.693687  |
| Prss36_j6        | 0.185086  | 0.0450223       | -2.03948   | 0.147602  | 0.476304  |
| Prss36_j5        | 0.682062  | 1.12355         | 0.720083   | 0.0479868 | 0.251853  |
| Pycard           | 0.354571  | 0.497137        | 0.487568   | 0.135798  | 0.458482  |
| BC017158_j3      | 1.38744   | 1.22395         | 0          | 1         | 1         |
| BC017158         | 4.62249   | 3.75925         | 0          | 1         | 1         |
| Rgs10            | 106.92    | 92.4677         | -0.209509  | 0.0208223 | 0.144992  |
| Tial1            | 5.74519   | 5.97526         | 0          | 1         | 1         |
| Tial1            | 2.22365   | 1.97824         | 0          | 1         | 1         |
| Mcmbp            | 1.69906   | 1.85083         | 0.123434   | 0.313526  | 0.657845  |
| Fgfr2            | 0.299671  | 0.200979        | -0.576332  | 0.176911  | 0.515993  |
| Gm5903           | 2.80266   | 2.74537         | -0.0297954 | 0.849139  | 0.952225  |
| Ate1_j3          | 5.51309   | 6.5004          | 0          | 1         | 1         |
| Ate1             | 5.72136   | 4.79692         | 0          | 1         | 1         |
| Ate1_j4          | 1.38038   | 1.35909         | 0          | 1         | 1         |
| Nsmce4a          | 5.29576   | 4.68587         | -0.176521  | 0.328219  | 0.670767  |
| Gm5602_j1        | 0.320379  | 0.35312         | 0.140379   | 0.649861  | 0.865521  |
| 2310057M21Rik_j1 | 0.418668  | 0.358815        | -0.222567  | 0.442226  | 0.750452  |
| Ikzf5            | 1.052     | 0.938439        | 0          | 1         | 1         |
| Cpxm2_j1         | 0.215154  | 0.256445        | 0.25328    | 0.664007  | 0.872726  |
| Cpxm2_j3         | 0.144331  | 0 -1.79769e+308 |            | 0.0056082 | 0.055432  |
| Chst15_j2        | 0.583193  | 1.62813         | 0          | 1         | 1         |
| Chst15_j3        | 4.92683   | 5.58772         | 0          | 1         | 1         |
| Oat              | 43.5974   | 46.8385         | 0.103452   | 0.249161  | 0.596627  |
| Mettl10_j2       | 0.183504  | 0.29603         | 0.68993    | 0.0332737 | 0.199024  |
| Mettl10_j6       | 0.391464  | 0 -1.79769e+308 |            | 3.03E-21  | 8.67E-19  |
| Ctbp2_j4         | 0.796213  | 0.744793        | 0          | 1         | 1         |
| Uros             | 15.3196   | 16.709          | 0          | 1         | 1         |
| Dhx32_j2         | 0.748819  | 0.574757        | 0          | 1         | 1         |
| D7Erd443e_j10    | 0.140829  | 0 -1.79769e+308 |            | 0.0012633 | 0.0172392 |
| D7Erd443e_j2     | 0.297517  | 0.0917701       | -1.69688   | 0.0175427 | 0.128567  |
| D7Erd443e_j5     | 0.241085  | 0.282338        | 0.227884   | 0.638775  | 0.860184  |
| D7Erd443e_j11    | 0.348899  | 0.189656        | -0.879428  | 0.137185  | 0.460677  |
| Fam196a_j3       | 0.0734616 | 0               | 0          | 1         | 1         |
| B830028B13Rik    | 0.194741  | 0.207583        | 0          | 1         | 1         |
| Ebf3_j8          | 2.07386   | 1.29548         | 0          | 1         | 1         |
| Ebf3             | 5.69939   | 5.73112         | 0          | 1         | 1         |
| 9430038I01Rik_j3 | 0.159488  | 0.250152        | 0.649357   | 0.376458  | 0.708503  |

|                  |           |           |            |           |           |
|------------------|-----------|-----------|------------|-----------|-----------|
| 9430038I01Rik_j1 | 0.0715839 | 0.0868629 | 0.279105   | 0.840673  | 1         |
| Tcerg1l          | 7.20916   | 5.90005   | -0.289104  | 0.0325732 | 0.1962    |
| Stk32c           | 6.39613   | 5.60099   | 0          | 1         | 1         |
| Nkx6-2           | 0.469735  | 0.348703  | -0.42985   | 0.270451  | 0.619596  |
| Adam8_j2         | 0.266739  | 0.572833  | 1.10269    | 0.000628  | 0.0098488 |
| Tubgcp2_j2       | 2.63152   | 1.0572    | -1.31564   | 1.85E-06  | 7.09E-05  |
| Tubgcp2          | 1.34499   | 1.547     | 0.201884   | 0.219163  | 0.565521  |
| Caly_j1          | 3.72585   | 2.85487   | -0.384147  | 0.113252  | 0.418904  |
| Caly             | 3.66248   | 2.46268   | -0.572592  | 0.0297827 | 0.184783  |
| Echs1            | 27.1495   | 27.4298   | 0.014819   | 0.885458  | 0.963679  |
| Sprn             | 6.0235    | 4.91016   | -0.294834  | 0.0296496 | 0.184356  |
| Zfp941_j2        | 3.46537   | 3.52497   | 0.0246014  | 0.866358  | 0.957557  |
| Zfp941           | 0.722203  | 0.691924  | -0.0617912 | 0.803265  | 0.934697  |
| Sirt3_j2         | 1.33592   | 1.62254   | 0          | 1         | 1         |
| Ifitm2           | 7.07434   | 8.04073   | 0.18473    | 0.287621  | 0.635738  |
| Ifitm3           | 26.686    | 35.1542   | 0.397611   | 0.0006957 | 0.0106678 |
| Sigirr_j1        | 0.348393  | 0.280886  | -0.310734  | 0.577836  | 0.830014  |
| Sigirr_j6        | 0.124207  | 0.0521479 | -1.25206   | 0.347857  | 1         |
| Rnh1             | 2.62083   | 7.11238   | 1.44031    | 8.68E-12  | 1.07E-09  |
| Rnh1             | 40.3093   | 74.6681   | 0.88938    | 0         | 0         |
| XLOC_030818      | 4.99243   | 5.17245   | 0.0511048  | 0.855503  | 0.954239  |
| Hras1            | 26.3079   | 28.8964   | 0.135394   | 0.278948  | 0.627636  |
| Hras1            | 52.3321   | 57.2802   | 0.13034    | 0.19917   | 0.542218  |
| Irf7             | 0.627743  | 1.07958   | 0          | 1         | 1         |
| Irf7             | 1.05029   | 1.2552    | 0          | 1         | 1         |
| Irf7             | 0.399248  | 0.535799  | 0          | 1         | 1         |
| Deaf1            | 0.905572  | 0.962961  | 0.0886473  | 0.677612  | 0.878807  |
| Deaf1_j1         | 0.196755  | 0.015323  | -3.68263   | 0.0713178 | 0.321068  |
| Pddc1            | 24.7132   | 22.8042   | -0.115987  | 0.27794   | 0.626763  |
| Cend1            | 171.6     | 140.872   | 0          | 1         | 1         |
| Slc25a22_j1      | 0.19308   | 0         | 0          | 1         | 1         |
| Slc25a22         | 6.44238   | 3.72052   | 0          | 1         | 1         |
| Slc25a22_j2      | 7.96892   | 6.6783    | 0          | 1         | 1         |
| Lrdd_j3          | 0.192607  | 0.0906181 | -1.08779   | 0.0317479 | 0.192954  |
| Chid1            | 0.591499  | 0.485154  | 0          | 1         | 1         |
| Tollip_j1        | 10.0221   | 15.6502   | 0          | 1         | 1         |
| Tollip           | 42.8138   | 42.5537   | 0          | 1         | 1         |
| 2700078K21Rik_j1 | 18.1505   | 17.3921   | 0          | 1         | 1         |
| 2700078K21Rik_j2 | 4.20772   | 3.63295   | 0          | 1         | 1         |
| 2700078K21Rik    | 0.77928   | 0.503257  | 0          | 1         | 1         |
| Dusp8            | 8.41097   | 8.04329   | 0          | 1         | 1         |
| XLOC_030835      | 0.226898  | 0.0820329 | -1.46777   | 0.31198   | 0.656438  |
| XLOC_030835      | 0.113433  | 0.0360768 | -1.6527    | 0.260833  | 1         |
| Ctsd             | 443.037   | 507.232   | 0.195219   | 0.0376053 | 0.215137  |
| AK145379_j1      | 0.0187968 | 0.078698  | 2.06584    | 0.195137  | 1         |
| Igf2             | 1.77418   | 1.10653   | -0.681112  | 0.0017975 | 0.022959  |
| Igf2             | 0.205803  | 0.774924  | 1.91279    | 3.09E-06  | 0.0001118 |



|                  |           |                        |            |           |           |
|------------------|-----------|------------------------|------------|-----------|-----------|
| Th_j5            | 1.35994   | 1.03291                | 0          | 1         | 1         |
| Th_j4            | 0.537431  | 0.408914               | 0          | 1         | 1         |
| R74862_j1        | 1.11075   | 1.22353                | 0          | 1         | 1         |
| Cdkn1c_j1        | 0.160491  | 0.325543               | 1.02036    | 0.117527  | 0.426531  |
| Phlda2           | 0.165002  | 0.0950314              | -0.79601   | 0.411855  | 0.730935  |
| Nap1l4_j5        | 14.7307   | 7.22393                | 0          | 1         | 1         |
| Tnfrsf22         | 0.295099  | 0.233544               | -0.3375    | 0.520763  | 0.797932  |
| Tnfrsf23         | 0.47122   | 0.387694               | -0.281485  | 0.392892  | 0.718965  |
| Osbp15_j3        | 0.229898  | 0.320573               | 0          | 1         | 1         |
| Mrgpre           | 1.04018   | 1.14604                | 0          | 1         | 1         |
| Nadsyn1_j4       | 0.527573  | 0 -1.79769e+308        |            | 5.75E-11  | 6.12E-09  |
| Nadsyn1_j5       | 0.535827  | 0.567238               | 0.0821863  | 0.826414  | 0.944049  |
| Ctnn_j1          | 25.2464   | 36.1465                | 0          | 1         | 1         |
| Ctnn             | 18.0454   | 22.2879                | 0          | 1         | 1         |
| Ctnn_j3          | 13.533    | 20.6453                | 0          | 1         | 1         |
| Ppfia1_j5        | 3.04392   | 2.4933                 | 0          | 1         | 1         |
| Ppfia1           | 1.93459   | 1.70979                | 0          | 1         | 1         |
| Ppfia1           | 1.98801   | 1.91157                | 0          | 1         | 1         |
| Fadd             | 0.847919  | 0.871627               | 0.0397846  | 0.857126  | 0.95474   |
| Ano1_j3          | 2.01988   | 0.873708               | 0          | 1         | 1         |
| Ccnd1            | 7.05298   | 6.14132                | -0.199684  | 0.0807169 | 0.345841  |
| Tpcn2_j1         | 0.168139  | 0.179876               | 0.0973429  | 0.841637  | 0.949957  |
| 1810010D01Rik_j3 | 0.221666  | 0.174844               | -0.342319  | 0.420348  | 0.736671  |
| Tpcn2            | 1.09571   | 0.886119               | -0.306295  | 0.256427  | 0.60531   |
| Tpcn2_j6         | 0.814055  | 0.817675               | 0.00640205 | 0.985309  | 0.995689  |
| Tpcn2            | 0.866165  | 0.708639               | -0.289592  | 0.369013  | 0.702243  |
| Cacng7           | 58.1967   | 51.5674                | -0.174478  | 0.0525888 | 0.266364  |
| Ndufa3           | 11.4659   | 11.3267                | -0.0176171 | 0.904731  | 0.969704  |
| Prpf31_j1        | 10.7436   | 10.3432                | 0          | 1         | 1         |
| Rps9             | 8.15205   | 9.71462                | 0.252995   | 0.290288  | 0.637671  |
| Leng8_j3         | 0.0495568 | 0.0894164              | 0          | 1         | 1         |
| Leng8_j7         | 4.20784   | 5.09294                | 0          | 1         | 1         |
| Leng8_j2         | 0         | 0.195631               | 0          | 1         | 1         |
| Lilra5           | 0.117443  | 0.347437               | 1.56479    | 0.0083107 | 0.0747174 |
| Suv420h2_j2      | 0         | 0.0543423 1.79769e+308 |            | 0.0893322 | 1         |
| Suv420h2         | 4.16517   | 4.67581                | 0.166839   | 0.307752  | 0.652771  |
| XLOC_029467      | 0.0434989 | 0.0834866              | 0.940566   | 0.470109  | 1         |
| Isoc2a_j2        | 0.0263009 | 0.0856264              | 1.70294    | 0.491969  | 1         |
| Zfp628_j5        | 1.92721   | 1.99162                | 0          | 1         | 1         |
| Nat14_j2         | 0.651767  | 0.675194               | 0          | 1         | 1         |
| Zfp524           | 1.85275   | 2.29853                | 0          | 1         | 1         |
| Zfp865_j5        | 0.83451   | 0.709266               | 0          | 1         | 1         |
| Zfp580_j4        | 2.61018   | 2.12524                | 0          | 1         | 1         |
| U2af2_j2         | 0.1085    | 0.180337               | 0          | 1         | 1         |
| U2af2_j4         | 0.124676  | 0.184657               | 0          | 1         | 1         |
| U2af2_j5         | 0.328675  | 0.643889               | 0          | 1         | 1         |
| Epn1             | 17.079    | 21.1821                | 0          | 1         | 1         |

|             |           |             |               |           |           |
|-------------|-----------|-------------|---------------|-----------|-----------|
| Epn1_j7     | 10.3143   | 9.87833     | 0             | 1         | 1         |
| Epn1_j10    | 26.9158   | 29.821      | 0             | 1         | 1         |
| Zfp444      | 0.687999  | 0.434738    | -0.662261     | 0.0305452 | 0.187939  |
| Zfp444      | 0.311586  | 0.68426     | 1.13491       | 0.0002441 | 0.0045303 |
| Zfp667      | 0.93316   | 1.26912     | 0.44363       | 0.0562165 | 0.277405  |
| AK038886_j1 | 0.152606  | 0.000534732 | -8.15678      | 0.555371  | 0.818204  |
| Zfp78_j5    | 0.355752  | 0.16196     | -1.13524      | 0.0170555 | 0.126039  |
| Zfp28_j5    | 0.210552  | 0.325254    | 0.627392      | 0.264591  | 0.613408  |
| Zfp28_j4    | 0         | 0.0618236   | 1.79769e+308  | 0.0318698 | 1         |
| Zfp28_j9    | 0.297669  | 0.487653    | 0.712147      | 0.14697   | 0.47537   |
| Zfp28_j11   | 0.907049  | 0.613898    | -0.563182     | 0.129119  | 0.447817  |
| Olfr1344_j1 | 0         | 0.104972    | 1.79769e+308  | 0.0352626 | 1         |
| Gm16532_j1  | 0.398589  | 0.240695    | -0.727695     | 0.423099  | 0.738677  |
| Rps5_j3     | 0.100478  | 0.119724    | 0.252825      | 0.870663  | 1         |
| Trim28      | 5.32165   | 4.67249     | 0             | 1         | 1         |
| Trim28_j4   | 20.3308   | 23.3357     | 0             | 1         | 1         |
| Trim28_j5   | 0         | 0.171867    | 0             | 1         | 1         |
| Lig1_j3     | 2.97141   | 3.48784     | 0             | 1         | 1         |
| Pla2g4c_j1  | 0.105345  | 0.0581426   | -0.857462     | 0.462228  | 1         |
| XLOC_029494 | 0.198367  | 0.175372    | 0             | 1         | 1         |
| XLOC_029494 | 0.688155  | 0.808769    | 0             | 1         | 1         |
| Napa_j4     | 14.3417   | 19.654      | 0             | 1         | 1         |
| Napa_j3     | 0         | 0.0664541   | 0             | 1         | 1         |
| Meis3_j5    | 5.2378    | 5.31174     | 0.0202224     | 0.939991  | 0.981798  |
| Zc3h4_j11   | 2.53594   | 2.42946     | 0             | 1         | 1         |
| XLOC_029499 | 0.175275  | 0.103335    | -0.762289     | 0.508447  | 0.790369  |
| Strn4_j1    | 0.502504  | 0.220618    | 0             | 1         | 1         |
| Strn4_j2    | 0.750422  | 0.78121     | 0             | 1         | 1         |
| Prkd2       | 0.471518  | 0.539133    | 0.193328      | 0.530716  | 0.80314   |
| Prkd2_j3    | 0.163448  | 0.346733    | 1.08499       | 0.0884285 | 0.364215  |
| Prkd2_j4    | 0.597152  | 0.590832    | -0.0153525    | 0.982529  | 0.994674  |
| Gng8_j5     | 4.52695   | 4.30526     | 0             | 1         | 1         |
| Gng8_j3     | 0.32913   | 0.110738    | 0             | 1         | 1         |
| Gng8_j6     | 0.927859  | 1.51594     | 0             | 1         | 1         |
| Ptgir       | 2.1435    | 2.13519     | 0             | 1         | 1         |
| Mill2_j3    | 0.156142  | 0.354386    | 0             | 1         | 1         |
| Mill2_j2    | 0.0948993 | 0.0673127   | 0             | 1         | 1         |
| Mill2_j6    | 0.0733535 | 0.156725    | 0             | 1         | 1         |
| Mill2_j7    | 0.0934387 | 0.000859282 | 0             | 1         | 1         |
| Pglyrp1_j1  | 0.77741   | 0.304106    | -1.3541       | 0.18162   | 0.521758  |
| Mypop       | 4.61031   | 2.7143      | 0             | 1         | 1         |
| Sympk       | 14.835    | 17.4566     | 0             | 1         | 1         |
| Sympk_j4    | 0.533518  | 0.748115    | 0             | 1         | 1         |
| Dmpk_j1     | 0.351241  | 0.454308    | 0             | 1         | 1         |
| Dmpk_j12    | 0.33904   | 0.383563    | 0             | 1         | 1         |
| Snrpd2      | 1.66403   | 1.95844     | 0             | 1         | 1         |
| Eml2_j4     | 0.088273  | 0           | -1.79769e+308 | 0.0099561 | 1         |

|                  |             |            |               |           |           |
|------------------|-------------|------------|---------------|-----------|-----------|
| Eml2_j8          | 0           | 0.0472305  | 1.79769e+308  | 0.104592  | 1         |
| Rtn2_j2          | 0.193067    | 6.73291    | 0             | 1         | 1         |
| Ercc2_j2         | 0.0995291   | 0.132905   | 0.4172        | 0.596341  | 1         |
| Exoc3l2_j3       | 0           | 0.140104   | 1.79769e+308  | 0.0058663 | 1         |
| Exoc3l2_j5       | 0.0655045   | 0.217469   | 1.73114       | 0.055012  | 0.273595  |
| Trappc6a_j2      | 0.274278    | 0.561152   | 1.03276       | 0.007461  | 0.0691063 |
| AK043814_j2      | 0.118292    | 0.162645   | 0             | 1         | 1         |
| Zfp180_j1        | 0.000288597 | 0.896512   | 0             | 1         | 1         |
| Zfp112_j2        | 0.243095    | 0.115711   | 0             | 1         | 1         |
| Zfp112_j3        | 0.0087873   | 0.0591423  | 0             | 1         | 1         |
| Zfp93_j1         | 0.726831    | 0.500105   | -0.539388     | 0.23624   | 0.583411  |
| Zfp93            | 1.88571     | 1.69027    | -0.157848     | 0.398556  | 0.722606  |
| 1500002O20Rik_j2 | 4.67066     | 4.43485    | -0.074739     | 0.648513  | 0.864697  |
| 1500002O20Rik_j3 | 10.2057     | 9.54558    | -0.0964635    | 0.460568  | 0.762108  |
| Plaur_j1         | 0.565717    | 3.00543    | 2.40942       | 1.10E-07  | 5.85E-06  |
| Cadm4_j2         | 7.74523     | 10.127     | 0             | 1         | 1         |
| Cadm4_j1         | 8.62992     | 6.30828    | 0             | 1         | 1         |
| Ethe1_j1         | 4.20112     | 3.79796    | -0.145552     | 0.647027  | 0.863936  |
| Ceacam10_j1      | 0.658838    | 0.494626   | -0.413586     | 0.555778  | 0.818549  |
| Rps19_j5         | 8.53733     | 10.1225    | 0             | 1         | 1         |
| Rps19_j6         | 3.81709     | 5.37746    | 0             | 1         | 1         |
| Arhgef1_j3       | 6.48732     | 7.59625    | 0             | 1         | 1         |
| Arhgef1_j13      | 6.5172      | 7.69152    | 0             | 1         | 1         |
| Zfp574_j1        | 0           | 0.0498874  | 1.79769e+308  | 0.0827166 | 1         |
| Cic              | 3.12258     | 5.76581    | 0             | 1         | 1         |
| Cic_j6           | 1.41048     | 3.85238    | 0             | 1         | 1         |
| Tmem145_j1       | 3.77736     | 2.82358    | 0             | 1         | 1         |
| Megf8_j3         | 1.33729     | 1.58388    | 0.244153      | 0.127699  | 0.445344  |
| Tgfb1_j1         | 0.863204    | 1.65025    | 0.934911      | 0.0402055 | 0.224574  |
| RP23-86L13.2     | 1.16603     | 1.20172    | 0.0434972     | 0.921025  | 0.975263  |
| Numbl            | 26.6725     | 32.3269    | 0.277383      | 0.004992  | 0.0506776 |
| Hipk4            | 0.253888    | 0.366365   | 0             | 1         | 1         |
| Akt2_j19         | 0.0744336   | 0.110912   | 0.575394      | 0.510798  | 1         |
| Ttc9b_j1         | 42.3821     | 44.7078    | 0             | 1         | 1         |
| Gm10046_j1       | 2.22597     | 2.01445    | 0             | 1         | 1         |
| Fbl_j1           | 0.955388    | 0.988532   | 0.0492008     | 0.887261  | 0.964235  |
| Fbl_j4           | 0.272424    | 0.16067    | 0             | 1         | 1         |
| Dyrk1b_j3        | 1.07382     | 1.10578    | 0             | 1         | 1         |
| Dyrk1b_j4        | 0.407004    | 0.00295563 | 0             | 1         | 1         |
| Paf1             | 0.872058    | 0.500219   | -0.801864     | 0.0046664 | 0.0481859 |
| Lrfn1_j4         | 3.5457      | 3.42452    | 0             | 1         | 1         |
| Fbxo27_j3        | 0.042503    | 0.125877   | 1.56638       | 0.146053  | 1         |
| Fbxo27_j5        | 0.108644    | 0          | -1.79769e+308 | 0.0050831 | 1         |
| Ech1             | 27.0179     | 26.9967    | -0.00113094   | 0.991329  | 0.997429  |
| Dpf1_j3          | 0.000523143 | 0.0819843  | 7.292         | 0.637642  | 1         |
| Dpf1_j7          | 0.0779166   | 0          | -1.79769e+308 | 0.0278261 | 1         |
| Dpf1_j8          | 0.0541425   | 0.180256   | 1.73522       | 0.223236  | 0.570235  |

|                  |             |                 |            |           |           |
|------------------|-------------|-----------------|------------|-----------|-----------|
| Zfp790_j2        | 0           | 0.186391        | 0          | 1         | 1         |
| Zfp420_j1        | 0.236914    | 0.295235        | 0          | 1         | 1         |
| Zfp260_j1        | 6.62648     | 5.85481         | 0          | 1         | 1         |
| Zfp382_j4        | 0.722834    | 0.509964        | 0          | 1         | 1         |
| Clip3_j1         | 33.674      | 28.8192         | 0          | 1         | 1         |
| AI428936_j2      | 1.43058     | 0.424663        | -1.75221   | 2.81E-05  | 0.0007326 |
| AI428936_j1      | 1.02648     | 1.26837         | 0.305271   | 0.289909  | 0.637269  |
| AK133438_j1      | 0.223711    | 0.238031        | 0          | 1         | 1         |
| AK133438_j2      | 0.0507733   | 0.226433        | 0          | 1         | 1         |
| AK133438_j4      | 0.0831976   | 0.248048        | 0          | 1         | 1         |
| Gm12784_j2       | 0.05697     | 0.130375        | 1.19439    | 0.317642  | 1         |
| XLOC_029650      | 0.439187    | 0.490508        | 0.159442   | 0.801208  | 0.933726  |
| Ccdc123          | 0.202391    | 0.206776        | 0.0309276  | 0.958186  | 0.988039  |
| Tshz3_j3         | 0.338436    | 2.52874         | 0          | 1         | 1         |
| XLOC_029665      | 0.441638    | 0.466547        | 0.0791572  | 0.806197  | 0.935928  |
| XLOC_029665      | 0.609008    | 0.468494        | -0.378432  | 0.273066  | 0.622048  |
| Vstm2b_j2        | 0.88902     | 0.269036        | -1.72442   | 1.23E-08  | 8.50E-07  |
| Zfp788           | 0.166445    | 0.191781        | 0          | 1         | 1         |
| Zfp788_j5        | 0.0058582   | 0.164812        | 0          | 1         | 1         |
| Vsig10l_j2       | 0.813324    | 0.68338         | -0.251141  | 0.464894  | 0.764951  |
| Klk5_j4          | 0.210334    | 0 -1.79769e+308 | 0.0037956  | 0.0413312 | 0.0413312 |
| 2410002F23Rik_j4 | 8.67952     | 11.1862         | 0          | 1         | 1         |
| Shank1_j4        | 0.517006    | 0.271859        | -0.927324  | 0.049169  | 0.255597  |
| Shank1_j3        | 0.4131      | 0.344408        | -0.262372  | 0.567612  | 0.824883  |
| XLOC_029693      | 4.97002     | 3.61352         | -0.459846  | 0.0506675 | 0.260716  |
| Syt3             | 2.30156     | 1.08524         | 0          | 1         | 1         |
| Syt3_j7          | 2.0376      | 2.09668         | 0          | 1         | 1         |
| Aspdh_j8         | 0.116368    | 0.111054        | -0.0674392 | 0.933001  | 1         |
| Josd2_j2         | 16.2291     | 19.7916         | 0.286303   | 0.0449618 | 0.242361  |
| Josd2_j1         | 1.94402     | 2.01106         | 0.0489157  | 0.853878  | 0.953758  |
| XLOC_029705      | 0.0157412   | 0.0496114       | 0          | 1         | 1         |
| Irf3             | 0.44887     | 0.961662        | 0          | 1         | 1         |
| Irf3             | 5.28293     | 5.08008         | 0          | 1         | 1         |
| Pih1d1_j1        | 0.309927    | 2.37177         | 0          | 1         | 1         |
| Pih1d1_j3        | 4.57167     | 2.65981         | 0          | 1         | 1         |
| Tead2            | 0.718203    | 0.572524        | -0.327056  | 0.371766  | 0.704676  |
| Plekha4          | 0.181104    | 0.164333        | 0          | 1         | 1         |
| Plekha4_j4       | 5.25906     | 6.90089         | 0          | 1         | 1         |
| Hsd17b14_j4      | 0.0259957   | 0.108356        | 2.05944    | 0.316576  | 1         |
| Hsd17b14_j5      | 0.107569    | 0.192375        | 0.838655   | 0.467649  | 0.766732  |
| Hsd17b14_j6      | 0.000398242 | 0.115568        | 8.18088    | 0.882905  | 1         |
| Hsd17b14_j9      | 0.0504886   | 0 -1.79769e+308 | 0.148292   | 0.148292  | 1         |
| Bcat2_j1         | 0.629501    | 1.88986         | 0          | 1         | 1         |
| Bcat2_j2         | 4.60325     | 7.50914         | 0          | 1         | 1         |
| Ntn5_j4          | 0.0572496   | 0.020951        | -1.45025   | 0.596586  | 1         |
| Car11_j7         | 3.86925     | 4.84828         | 0          | 1         | 1         |
| Car11            | 0.575167    | 1.5333          | 0          | 1         | 1         |

|             |            |                 |            |           |          |
|-------------|------------|-----------------|------------|-----------|----------|
| Dbp_j1      | 1.31899    | 1.64287         | 0          | 1         | 1        |
| Lmtk3_j1    | 0.184339   | 0.156669        | 0          | 1         | 1        |
| Lmtk3_j3    | 0.623985   | 0.578243        | 0          | 1         | 1        |
| Tmem143_j1  | 2.63691    | 2.13191         | 0          | 1         | 1        |
| Kcnc1_j3    | 0.172688   | 0.216827        | 0          | 1         | 1        |
| Zdhhc13_j2  | 2.44919    | 2.17407         | -0.171908  | 0.489801  | 0.779571 |
| Nav2_j8     | 0.188559   | 0.242622        | 0.363699   | 0.385753  | 0.714213 |
| Nav2_j11    | 0.175595   | 0.192038        | 0.129136   | 0.786586  | 0.928645 |
| Htati2_j2   | 1.47476    | 1.99253         | 0          | 1         | 1        |
| Prmt3_j3    | 12.6818    | 12.825          | 0.0162051  | 0.894989  | 0.966853 |
| Luzp2_j4    | 0          | 1.3025          | 0          | 1         | 1        |
| Cyfip1_j1   | 8.44134    | 8.73374         | 0.0491276  | 0.651911  | 0.866482 |
| Herc2_j2    | 0.360918   | 0.231313        | 0          | 1         | 1        |
| Herc2_j5    | 26.2589    | 26.4294         | 0          | 1         | 1        |
| XLOC_029760 | 0.375057   | 0.4522          | 0          | 1         | 1        |
| Gabrb3      | 0.0705929  | 0.106076        | 0          | 1         | 1        |
| XLOC_029765 | 0.225094   | 0.144398        | -0.64047   | 0.119749  | 0.430734 |
| Ube3a_j2    | 0.404126   | 0.406674        | 0.00906662 | 0.980809  | 0.994152 |
| Ube3a_j8    | 3.04405    | 3.79095         | 0.316569   | 0.100349  | 0.392071 |
| XLOC_029771 | 0.00012326 | 0.573126        | 12.1829    | 0.947047  | 0.984332 |
| Mtmr10_j2   | 0.157173   | 0.167752        | 0          | 1         | 1        |
| Mcee_j4     | 4.69247    | 5.79255         | 0.30385    | 0.258131  | 0.606747 |
| Apba2_j1    | 0.0829181  | 0.1936          | 0          | 1         | 1        |
| Apba2_j3    | 0.611719   | 0.495633        | 0          | 1         | 1        |
| Tarsl2_j1   | 2.02091    | 2.74685         | 0          | 1         | 1        |
| Tm2d3       | 2.29773    | 1.99544         | -0.203505  | 0.551284  | 0.815768 |
| Pcsk6_j3    | 0.301918   | 0.325003        | 0.1063     | 0.85589   | 0.95442  |
| Snrpa1      | 1.13933    | 0.928159        | -0.295745  | 0.499962  | 0.784934 |
| Lins2_j5    | 5.61E-05   | 0.156393        | 0          | 1         | 1        |
| Lins2_j4    | 0.21161    | 0.0947201       | 0          | 1         | 1        |
| Lins2       | 0.723951   | 1.91613         | 0          | 1         | 1        |
| Lins2_j3    | 0.29762    | 0.634131        | 0          | 1         | 1        |
| Lysmd4      | 0.889555   | 0 -1.79769e+308 |            | 2.71E-18  | 7.30E-16 |
| Ttc23_j1    | 0.59914    | 0.827387        | 0          | 1         | 1        |
| Igf1r_j1    | 3.77183    | 3.34006         | -0.175388  | 0.144669  | 0.472042 |
| BC070425_j4 | 0.183347   | 0.299826        | 0.709548   | 0.247476  | 0.595007 |
| Rgma_j1     | 0          | 0.100782        | 0          | 1         | 1        |
| Akap13_j11  | 4.79574    | 4.94617         | 0.0445575  | 0.697061  | 0.888506 |
| Isg20_j1    | 0.0043518  | 0.635893        | 7.19103    | 0.260251  | 0.608919 |
| Isg20       | 1.20035    | 1.30868         | 0.124659   | 0.671279  | 0.875757 |
| Zfp710_j2   | 4.55619    | 4.90843         | 0.107432   | 0.378414  | 0.710052 |
| XLOC_029814 | 0.0333838  | 0.0474667       | 0.507765   | 0.812553  | 1        |
| Sema4b_j2   | 0.263654   | 0.457399        | 0.794809   | 0.0981933 | 0.387323 |
| Prc1        | 0.564486   | 1.3533          | 0          | 1         | 1        |
| Prc1_j1     | 0.309283   | 0.64975         | 0          | 1         | 1        |
| Hddc3       | 0.4842     | 0.443972        | -0.125133  | 0.762023  | 0.918069 |
| Hddc3_j1    | 0.437212   | 0.559713        | 0.356355   | 0.437622  | 0.747795 |

|             |           |                 |            |           |           |
|-------------|-----------|-----------------|------------|-----------|-----------|
| XLOC_029821 | 0.195129  | 0.191755        | -0.0251617 | 0.962957  | 0.989715  |
| Zscan2      | 0.119013  | 0.178498        | 0          | 1         | 1         |
| Pde8a_j1    | 0.34394   | 0.297084        | -0.211283  | 0.683539  | 0.881559  |
| AK013794_j1 | 0.140631  | 0.205483        | 0.547102   | 0.63022   | 0.856283  |
| Fam103a1_j3 | 0.575641  | 0.469953        | -0.292652  | 0.504401  | 0.787686  |
| Sh3gl3      | 0.749256  | 0.490533        | -0.611109  | 0.214989  | 0.560555  |
| Sh3gl3_j3   | 0.845582  | 0.723252        | -0.225446  | 0.655022  | 0.868237  |
| Adamts13_j6 | 0.513612  | 0.45439         | -0.176748  | 0.613257  | 0.847467  |
| Eftud1      | 1.4785    | 1.19805         | 0          | 1         | 1         |
| Mesdc2      | 6.21105   | 6.86372         | 0          | 1         | 1         |
| Me3_j3      | 1.12683   | 0.63102         | -0.836507  | 0.0706878 | 0.319602  |
| Me3_j4      | 1.40752   | 1.30047         | -0.114121  | 0.7476    | 0.912113  |
| Picalm      | 3.70183   | 3.36054         | -0.139543  | 0.45797   | 0.760743  |
| Sytl2_j2    | 26.4522   | 33.9957         | 0          | 1         | 1         |
| Sytl2_j6    | 13.1344   | 21.341          | 0          | 1         | 1         |
| Dlg2        | 2.26702   | 2.34754         | 0          | 1         | 1         |
| Odz4_j9     | 0.272855  | 0.258024        | -0.0806282 | 0.868017  | 0.958216  |
| Odz4_j11    | 1.02878   | 0.706665        | -0.541835  | 0.0104662 | 0.0884052 |
| Kctd21_j1   | 3.00207   | 2.82733         | 0          | 1         | 1         |
| Alg8_j2     | 0.284511  | 0.361278        | 0.344626   | 0.566401  | 0.824486  |
| Alg8_j4     | 0.0711195 | 0 -1.79769e+308 | 0.0852988  | 0.0852988 | 1         |
| Ints4_j4    | 1.90549   | 1.29392         | -0.558413  | 0.0271568 | 0.174053  |
| Ints4_j3    | 0.0860893 | 0.0662746       | -0.377378  | 0.702896  | 1         |
| Pak1_j1     | 0.337538  | 0 -1.79769e+308 | 1.70E-05   | 0.0004866 | 0.0004866 |
| Arrb1_j2    | 1.52806   | 2.82326         | 0          | 1         | 1         |
| Arrb1_j9    | 24.1492   | 30.7686         | 0          | 1         | 1         |
| Pgm2l1      | 14.9951   | 20.8439         | 0          | 1         | 1         |
| P4ha3_j1    | 0.0832314 | 0.21821         | 1.39052    | 0.166133  | 0.502787  |
| Ucp2_j1     | 0.197703  | 0.146222        | -0.435177  | 0.658719  | 0.870342  |
| Rab6        | 78.5766   | 69.3181         | 0          | 1         | 1         |
| Rab6_j1     | 114.697   | 106.747         | 0          | 1         | 1         |
| Pde2a       | 5.48353   | 4.68292         | -0.227697  | 0.104683  | 0.401565  |
| Numa1_j6    | 0.0210015 | 0.0734163       | 0          | 1         | 1         |
| Numa1_j9    | 0.345071  | 0.388715        | 0          | 1         | 1         |
| Trpc2_j4    | 0.238964  | 0.403995        | 0.757546   | 0.176925  | 0.516004  |
| Pgap2_j1    | 0         | 0.0579749       | 0          | 1         | 1         |
| XLOC_029910 | 0.818884  | 0.768932        | 0          | 1         | 1         |
| Stim1_j6    | 4.03804   | 2.25905         | 0          | 1         | 1         |
| Trim6_j2    | 0.165735  | 0.122995        | -0.430278  | 0.686213  | 0.883052  |
| Trim6_j7    | 0.131616  | 0.0472212       | -1.47883   | 0.217042  | 1         |
| XLOC_029922 | 0.235914  | 0.210756        | -0.162684  | 0.813619  | 0.939161  |
| Dnhd1       | 0.073683  | 0.0508674       | -0.534591  | 0.619482  | 1         |
| Dnhd1_j12   | 0.134267  | 0.210933        | 0.651677   | 0.382859  | 0.712805  |
| Ilk         | 2.40365   | 0.615801        | 0          | 1         | 1         |
| Ppfibp2_j12 | 0.919078  | 0.900042        | -0.030195  | 0.941761  | 0.982257  |
| AK007082    | 0.487136  | 0.641608        | 0          | 1         | 1         |
| Rpl27a_j1   | 11.6491   | 16.7569         | 0          | 1         | 1         |

|                  |             |           |               |           |          |
|------------------|-------------|-----------|---------------|-----------|----------|
| Swap70_j1        | 0           | 0.0711659 | 1.79769e+308  | 0.0226241 | 1        |
| Ampd3_j1         | 7.28267     | 8.66446   | 0             | 1         | 1        |
| Ampd3_j5         | 6.78622     | 8.21896   | 0             | 1         | 1        |
| Mical2_j8        | 1.11925     | 1.5671    | 0.485564      | 0.326277  | 0.669409 |
| Parva            | 21.6681     | 20.071    | 0             | 1         | 1        |
| Tead1_j1         | 0.153789    | 0.108355  | -0.505186     | 0.609954  | 0.846292 |
| Tead1_j2         | 0.102892    | 0.282115  | 1.45515       | 0.0916825 | 0.372083 |
| Arntl_j8         | 0.047905    | 0.138457  | 1.53119       | 0.150292  | 1        |
| Far1             | 3.9194      | 1.69476   | 0             | 1         | 1        |
| XLOC_029959      | 2.61482     | 7.02544   | 1.42588       | 0.068969  | 0.314824 |
| AK045786_j2      | 0.39451     | 0.327203  | -0.269877     | 0.781292  | 0.926119 |
| Tmc5_j6          | 0.0937334   | 0.408646  | 2.12422       | 0.0916501 | 0.372013 |
| 6330503K22Rik    | 7.52282     | 6.65495   | -0.176845     | 0.161554  | 0.496458 |
| 2610020H08Rik_j2 | 0.145401    | 0.193059  | 0.409002      | 0.660754  | 0.871356 |
| 2610020H08Rik_j3 | 0.0870219   | 0.0917385 | 0.0761486     | 0.919199  | 1        |
| Lymr1_j3         | 3.42493     | 4.44738   | 0             | 1         | 1        |
| Tmem159_j2       | 0.000332465 | 2.37721   | 12.8038       | 0.874595  | 0.960128 |
| BC030336_j2      | 1.4575      | 1.41879   | -0.0388346    | 0.884167  | 0.963322 |
| Eef2k_j1         | 1.83345     | 2.33329   | 0             | 1         | 1        |
| Polr3e           | 0.725414    | 0.0971993 | 0             | 1         | 1        |
| Mettl9_j3        | 1.12        | 0.751491  | -0.575676     | 0.353724  | 0.68999  |
| Otoa_j2          | 1.49512     | 1.80038   | 0.268044      | 0.522391  | 0.798868 |
| Hs3st2_j2        | 15.1945     | 8.56144   | 0             | 1         | 1        |
| Plk1_j3          | 0.559613    | 0         | -1.79769e+308 | 0.0124217 | 0.100682 |
| Plk1_j11         | 0           | 0.132074  | 1.79769e+308  | 0.0849431 | 1        |
| 2010110P09Rik_j1 | 3.47343     | 4.20052   | 0             | 1         | 1        |
| 2010110P09Rik_j3 | 1.3235      | 1.80151   | 0             | 1         | 1        |
| Rbbp6_j1         | 0.00162607  | 0.333631  | 0             | 1         | 1        |
| Rbbp6_j3         | 0.883229    | 1.34144   | 0             | 1         | 1        |
| AK140221         | 1.51433     | 1.33792   | -0.178686     | 0.373245  | 0.706161 |
| Tnrc6a_j3        | 1.28909     | 1.44826   | 0             | 1         | 1        |
| Slc5a11_j5       | 0           | 0.0791002 | 0             | 1         | 1        |
| Slc5a11_j4       | 0.168263    | 0         | 0             | 1         | 1        |
| Slc5a11_j14      | 0.179751    | 0         | 0             | 1         | 1        |
| Hs3st4_j2        | 1.01872     | 1.23281   | 0.275195      | 0.345701  | 0.684965 |
| Il4ra_j1         | 9.60564     | 15.8411   | 0             | 1         | 1        |
| XLOC_030000      | 0.177082    | 0.141091  | 0             | 1         | 1        |
| Rabep2_j3        | 1.38201     | 1.34858   | -0.0353297    | 0.87011   | 0.958679 |
| Ccdc101_j1       | 8.15833     | 9.32683   | 0.193112      | 0.149552  | 0.479064 |
| Bola2            | 3.88658     | 4.31992   | 0.152503      | 0.139309  | 0.464195 |
| Mapk3            | 520.641     | 570.905   | 0.132962      | 0.150796  | 0.481561 |
| Mapk3_j2         | 10.8252     | 11.1764   | 0.046058      | 0.774569  | 0.923737 |
| Tbx6_j1          | 0.32474     | 0.538439  | 0.729499      | 0.0296542 | 0.184361 |
| Hirip3_j1        | 0.877224    | 1.03695   | 0.241335      | 0.157097  | 0.490842 |
| Prr14            | 8.10423     | 8.87564   | 0.131176      | 0.271698  | 0.620539 |
| Srcap_j9         | 1.9909      | 1.35317   | -0.557074     | 1         | 1        |
| BC048731_j1      | 4.56964     | 4.72145   | 0.0471512     | 0.724133  | 0.901854 |

|                  |           |           |               |           |           |
|------------------|-----------|-----------|---------------|-----------|-----------|
| Phkg2            | 3.34506   | 3.3617    | 0.00715768    | 0.965429  | 0.990079  |
| Phkg2_j3         | 0.577708  | 0.578447  | 0.00184463    | 0.998006  | 0.999228  |
| Fbxl19_j7        | 1.10362   | 1.1776    | 0             | 1         | 1         |
| Setd1a_j1        | 4.28073   | 4.71909   | 0             | 1         | 1         |
| Hsd3b7_j2        | 5.42906   | 6.10313   | 0             | 1         | 1         |
| Zfp646           | 0.823983  | 1.02983   | 0.321727      | 0.120242  | 0.431782  |
| Myst1_j2         | 0         | 0.145681  | 1.79769e+308  | 0.0750216 | 1         |
| Fus              | 12.4371   | 13.9878   | 0             | 1         | 1         |
| Fus              | 0         | 0.0930693 | 0             | 1         | 1         |
| Itgam_j4         | 0.0790976 | 0.0798186 | 0.0130923     | 0.9907    | 1         |
| Inpp5f           | 0.0965384 | 0.180748  | 0.904809      | 0.078603  | 0.340034  |
| Ppapdc1a_j1      | 0.145051  | 0.172065  | 0.246397      | 0.794852  | 0.931484  |
| Tacc2_j8         | 8.71431   | 6.17666   | 0             | 1         | 1         |
| Tacc2_j10        | 6.64117   | 8.38042   | 0             | 1         | 1         |
| Btbd16_j1        | 0.0804921 | 0.0633402 | -0.345725     | 0.729757  | 1         |
| Htra1_j3         | 0         | 0.0916745 | 1.79769e+308  | 0.126905  | 1         |
| Pstk             | 7.42619   | 7.0916    | 0             | 1         | 1         |
| Pstk_j1          | 2.64428   | 2.82126   | 0             | 1         | 1         |
| Acadsb_j1        | 8.2606    | 8.03289   | 0             | 1         | 1         |
| Lhpp_j3          | 0         | 0.404362  | 1.79769e+308  | 0.0023216 | 0.0280876 |
| Zranb1_j5        | 2.86628   | 3.75693   | 0             | 1         | 1         |
| Zranb1_j3        | 2.63232   | 3.0573    | 0             | 1         | 1         |
| 2700050L05Rik_j3 | 0.343573  | 0.608922  | 0             | 1         | 1         |
| Fank1            | 0.030152  | 0.319146  | 0             | 1         | 1         |
| XLOC_030062      | 0.108429  | 0.119232  | 0.137019      | 0.884853  | 1         |
| Glrx3_j4         | 11.179    | 11.0861   | -0.0120467    | 0.944164  | 0.983317  |
| Glrx3_j9         | 10.2884   | 10.1548   | -0.018858     | 0.910561  | 0.971869  |
| XLOC_030069      | 0.256485  | 0         | -1.79769e+308 | 0.0002823 | 0.0050832 |
| Ppp2r2d_j1       | 0.946419  | 1.16655   | 0             | 1         | 1         |
| Ppp2r2d          | 1.70138   | 1.84152   | 0             | 1         | 1         |
| Ppp2r2d_j6       | 25.2928   | 26.3823   | 0             | 1         | 1         |
| Jakmip3_j7       | 0.22342   | 0.374293  | 0.744411      | 0.208962  | 0.553156  |
| Pwwp2b_j1        | 2.07812   | 2.99448   | 0.527024      | 0.13096   | 0.450516  |
| Mtg1_j3          | 6.05499   | 7.02689   | 0.214761      | 0.0797748 | 0.343208  |
| Ric8_j1          | 34.7662   | 47.1753   | 0             | 1         | 1         |
| Ifitm1           | 0.15954   | 0.254632  | 0.674496      | 0.421261  | 0.737396  |
| B4galnt4         | 4.72256   | 5.24804   | 0.15221       | 0.252144  | 0.600172  |
| Pkp3_j2          | 0.0270537 | 0.0833469 | 1.6233        | 0.361953  | 1         |
| Rassf7_j5        | 0.0297484 | 0.118636  | 1.99566       | 0.184437  | 1         |
| Phrf1_j7         | 4.67305   | 5.19458   | 0             | 1         | 1         |
| Eps8l2           | 0.403451  | 0.247848  | -0.702938     | 0.0668783 | 0.309137  |
| Taldo1_j1        | 24.6782   | 35.4178   | 0             | 1         | 1         |
| Rplp2_j2         | 1.37647   | 1.70525   | 0.309003      | 0.5186    | 0.796493  |
| Rplp2_j4         | 1.29194   | 1.4133    | 0.129534      | 0.763198  | 0.918454  |
| Rplp2_j8         | 0.196899  | 0.0408726 | -2.26825      | 0.0648339 | 0.302875  |
| Cd151_j10        | 2.57343   | 2.60008   | 0             | 1         | 1         |
| Ap2a2_j3         | 9.83783   | 21.8686   | 0             | 1         | 1         |



|                   |           |                       |             |           |           |
|-------------------|-----------|-----------------------|-------------|-----------|-----------|
| XLOC_030107       | 0.139906  | 0.185981              | 0.410697    | 0.596032  | 0.839157  |
| Brsk2_j4          | 8.38755   | 8.78247               | 0           | 1         | 1         |
| Brsk2_j3          | 5.39888   | 6.37615               | 0           | 1         | 1         |
| Brsk2_j9          | 0.451885  | 0.131313              | 0           | 1         | 1         |
| Lsp1_j1           | 3.78E-05  | 0.172205              | 12.1548     | 0.969528  | 0.991454  |
| Cd81_j6           | 1.18875   | 1.29881               | 0           | 1         | 1         |
| Cd81_j1           | 7.62139   | 7.42262               | 0           | 1         | 1         |
| Kcnq1_j4          | 0.0784816 | 0.0574703             | -0.449539   | 0.563898  | 1         |
| Dhcr7_j5          | 37.6633   | 38.2444               | 0.0220908   | 0.810492  | 0.937901  |
| Oscar_j1          | 0.156672  | 0.256194              | 0.709488    | 0.116651  | 0.424687  |
| Tfpt_j4           | 3.0675    | 3.12496               | 0.0267766   | 0.880218  | 0.961793  |
| Tmc4_j5           | 0.890288  | 1.01811               | 0           | 1         | 1         |
| Lair1             | 0.334184  | 0.667419              | 0.997952    | 0.0023325 | 0.0281892 |
| Cdc42ep5          | 2.64368   | 2.38147               | 0           | 1         | 1         |
| Rdh13_j4          | 0.651117  | 0.000623679           | 0           | 1         | 1         |
| Ppp1r12c_j2       | 0.583762  | 0.371104              | 0           | 1         | 1         |
| 6030429G01Rik_j7  | 0.0532887 | 0.0565001             | 0.0844243   | 0.958577  | 1         |
| 6030429G01Rik_j12 | 0.372438  | 0.370853              | -0.00615638 | 0.989249  | 0.996615  |
| Syt5_j3           | 18.8024   | 21.8813               | 0           | 1         | 1         |
| Ppp6r1_j1         | 0.153004  | 0.115501              | 0           | 1         | 1         |
| Ppp6r1_j6         | 0.101119  | 0                     | 0           | 1         | 1         |
| Hspbp1            | 12.8966   | 13.4234               | 0           | 1         | 1         |
| Cox6b2_j1         | 0.102458  | 0.0982275             | -0.0608401  | 0.975791  | 1         |
| Cox6b2_j2         | 0.0731114 | 0.478702              | 2.71096     | 0.0667909 | 0.308908  |
| Shisa7_j3         | 0.0602375 | 0 -1.79769e+308       |             | 0.0015381 | 1         |
| Shisa7_j4         | 0.277743  | 0.232621              | -0.255771   | 0.464233  | 0.764606  |
| Zfp579_j3         | 2.2792    | 3.59437               | 0.657211    | 0.0425749 | 0.233262  |
| Fiz1              | 1.86573   | 2.80399               | 0           | 1         | 1         |
| AK080857_j2       | 0.784007  | 0.658911              | 0           | 1         | 1         |
| Zfp583_j5         | 1.22058   | 2.28687               | 0.905806    | 0.129959  | 0.44894   |
| Zfp772_j1         | 4.1269    | 4.33617               | 0           | 1         | 1         |
| Zfp772_j2         | 1.03019   | 1.21597               | 0           | 1         | 1         |
| Clcn4-2_j7        | 5.05925   | 6.74167               | 0           | 1         | 1         |
| Clcn4-2_j4        | 0.325333  | 1.09294               | 0           | 1         | 1         |
| Zscan18_j1        | 0         | 0.688085 1.79769e+308 |             | 2.12E-05  | 0.0005803 |
| Zfp329_j4         | 0.622485  | 0.86974               | 0.482544    | 0.0712461 | 0.320953  |
| Ube2m_j5          | 0.242793  | 0.112157              | 0           | 1         | 1         |
| Ube2m_j6          | 37.8704   | 40.3483               | 0           | 1         | 1         |
| XLOC_030175       | 0.10274   | 0.127012              | 0.305977    | 0.784379  | 1         |
| Sepw1_j5          | 2.78359   | 3.63197               | 0.383806    | 0.236219  | 0.583411  |
| Ehd2_j1           | 0.402235  | 0.582835              | 0.535049    | 0.124145  | 0.439098  |
| Gltscr1_j1        | 0.19455   | 0.239485              | 0           | 1         | 1         |
| Gltscr1_j5        | 0.246711  | 0.133137              | 0           | 1         | 1         |
| Ccdc9_j3          | 0.0610612 | 0 -1.79769e+308       |             | 0.0073108 | 1         |
| Sae1              | 41.2773   | 42.9143               | 0.0561108   | 0.537203  | 0.807392  |
| Fkrp              | 7.96474   | 5.86432               | 0           | 1         | 1         |
| 9330104G04Rik     | 0.538853  | 0.659024              | 0.290438    | 0.40872   | 0.729001  |

|                  |             |           |           |           |           |
|------------------|-------------|-----------|-----------|-----------|-----------|
| Calm3_j1         | 332.936     | 329.539   | 0         | 1         | 1         |
| Calm3            | 11.6879     | 10.3653   | 0         | 1         | 1         |
| Qpctl_j2         | 0.0823099   | 0.0923422 | 0         | 1         | 1         |
| Mark4_j3         | 0.41954     | 0.202877  | 0         | 1         | 1         |
| Bloc1s3_j1       | 1.21532     | 0.519324  | -1.22662  | 0.00807   | 0.0730665 |
| Lrrc68_j3        | 0.335654    | 0.308107  | 0         | 1         | 1         |
| Gemin7           | 5.07537     | 6.55417   | 0         | 1         | 1         |
| Clasrp_j9        | 1.24745     | 0.8575    | -0.540779 | 0.125295  | 0.440957  |
| Clasrp_j2        | 4.44144     | 4.8251    | 0.119532  | 0.428899  | 0.742566  |
| Clasrp_j11       | 0.400439    | 0.641536  | 0.679948  | 0.173424  | 0.511266  |
| Tomm40_j1        | 60.2083     | 64.2739   | 0         | 1         | 1         |
| Bcl3_j2          | 1.63272     | 1.93141   | 0         | 1         | 1         |
| Zfp111_j2        | 0.477005    | 0.377479  | -0.33761  | 0.207233  | 0.551728  |
| Zfp61_j5         | 0.11389     | 0.233329  | 1.03473   | 0.24721   | 0.594761  |
| Zfp94_j3         | 0.357132    | 0.106906  | -1.74011  | 0.0105048 | 0.0886544 |
| Zfp94            | 0.0473916   | 0.060177  | 0.344582  | 0.717321  | 1         |
| Zfp575_j2        | 1.24884     | 0.988198  | -0.33772  | 0.535515  | 0.80631   |
| Atp1a3_j2        | 2.24227     | 1.80515   | 0         | 1         | 1         |
| Grik5_j1         | 5.23423     | 4.84427   | -0.111698 | 0.396806  | 0.721313  |
| Dedd2_j4         | 0.0139532   | 1.76275   | 0         | 1         | 1         |
| Gsk3a_j5         | 18.2264     | 19.4524   | 0         | 1         | 1         |
| Gsk3a_j1         | 2.06482     | 1.16371   | 0         | 1         | 1         |
| Gsk3a_j2         | 5.97649     | 7.36092   | 0         | 1         | 1         |
| Pafah1b3_j1      | 5.00214     | 7.37914   | 0.560906  | 0.0067312 | 0.0638516 |
| Ceacam1_j1       | 0.389698    | 0.442832  | 0         | 1         | 1         |
| Tmem91_j2        | 0.0699619   | 0.123288  | 0.817386  | 0.538115  | 1         |
| Cyp2s1_j1        | 0.292553    | 0.318705  | 0.123522  | 0.806058  | 0.935898  |
| Shkbp1_j1        | 2.93229     | 3.0381    | 0.0511415 | 0.865584  | 0.957106  |
| Shkbp1           | 2.24905     | 2.90705   | 0.370238  | 0.0668784 | 0.309137  |
| Spnb4_j11        | 0.0627282   | 0.0863241 | 0.460649  | 0.684911  | 1         |
| Spnb4_j12        | 0.0879888   | 0.0289803 | -1.60225  | 0.208478  | 1         |
| Pld3_j1          | 46.3298     | 59.3316   | 0         | 1         | 1         |
| Map3k10_j1       | 3.05532     | 2.98131   | 0         | 1         | 1         |
| Map3k10_j2       | 5.82955     | 6.17889   | 0         | 1         | 1         |
| Map3k10_j5       | 3.90984     | 4.01353   | 0         | 1         | 1         |
| XLOC_030260      | 0.72985     | 0.821419  | 0.170519  | 0.587675  | 0.835072  |
| XLOC_030260      | 0.786221    | 0.601854  | -0.38552  | 0.401133  | 0.72452   |
| 1700049G17Rik_j2 | 0.212784    | 0.101907  | -1.06214  | 0.388012  | 0.71554   |
| Zfp780b_j4       | 0.144659    | 0.144372  | 0         | 1         | 1         |
| XLOC_030263      | 0.855482    | 0.905255  | 0         | 1         | 1         |
| Supt5h_j5        | 0.0284791   | 0.103995  | 0         | 1         | 1         |
| Plekhg2          | 0.112162    | 0.392638  | 0         | 1         | 1         |
| Med29            | 2.1998      | 2.37097   | 0.108101  | 0.536237  | 0.806648  |
| Fam98c_j2        | 0.279346    | 0.330906  | 0.244369  | 0.748216  | 0.912349  |
| Fam98c_j3        | 0.581248    | 0.595582  | 0.0351459 | 0.920804  | 0.97524   |
| Sipa1l3_j1       | 0.775654    | 0.180286  | -2.10513  | 7.08E-09  | 5.09E-07  |
| Zfp14_j5         | 0.000905204 | 0.126133  | 0         | 1         | 1         |

|                  |           |           |               |           |          |
|------------------|-----------|-----------|---------------|-----------|----------|
| Tbcb_j2          | 7.37063   | 10.4599   | 0.505008      | 0.0307486 | 0.188828 |
| Wdr62_j2         | 0.204978  | 0.203856  | -0.00791675   | 0.990614  | 0.997044 |
| Wdr62_j11        | 0.208853  | 0.177078  | -0.238105     | 0.618938  | 0.850446 |
| Arhgap33_j3      | 0.169243  | 0         | 0             | 1         | 1        |
| BC053749_j1      | 0.089442  | 0.138914  | 0.63517       | 0.37508   | 1        |
| Lin37_j1         | 1.60149   | 1.58744   | 0             | 1         | 1        |
| Lin37            | 4.85938   | 4.54018   | 0             | 1         | 1        |
| Rbm42_j7         | 0.120704  | 0.0912977 | -0.402818     | 0.715957  | 1        |
| Tmem147_j2       | 0.242563  | 0.157095  | -0.626726     | 0.536203  | 0.806638 |
| Tmem147          | 0.0211343 | 0.0796188 | 1.91352       | 0.379574  | 1        |
| Usf2_j6          | 0.972842  | 0.676257  | 0             | 1         | 1        |
| Usf2_j10         | 0         | 0.0850139 | 0             | 1         | 1        |
| Lsr_j2           | 0.295319  | 0.0710275 | -2.05583      | 0.040479  | 0.225632 |
| Fxyd5_j3         | 0.0468958 | 0.103643  | 0             | 1         | 1        |
| Fxyd5_j4         | 0.595942  | 0.544173  | 0             | 1         | 1        |
| Hpn_j7           | 0         | 0.0760224 | 1.79769e+308  | 0.040088  | 1        |
| Scn1b_j2         | 166.472   | 148.003   | -0.169649     | 0.0593491 | 0.286424 |
| Scn1b_j5         | 2.10461   | 1.53237   | -0.457788     | 0.204052  | 0.548285 |
| Gramd1a_j1       | 12.0341   | 17.9544   | 0             | 1         | 1        |
| Gpi1_j5          | 0.0605295 | 0.0810716 | 0             | 1         | 1        |
| Gpi1_j6          | 0.102571  | 0.0865839 | 0             | 1         | 1        |
| 4931406P16Rik_j4 | 1.56331   | 1.55899   | 0             | 1         | 1        |
| 4931406P16Rik_j5 | 0.0467046 | 0.147439  | 0             | 1         | 1        |
| Lrp3_j1          | 1.56267   | 1.32134   | 0             | 1         | 1        |
| Pdcd5_j1         | 0.105705  | 0.0609954 | -0.79327      | 0.522156  | 1        |
| Pdcd5_j3         | 1.72241   | 2.17493   | 0.336537      | 0.329282  | 0.671533 |
| Zfp507_j5        | 0.352224  | 0.470428  | 0             | 1         | 1        |
| Pop4_j4          | 5.94754   | 6.68903   | 0             | 1         | 1        |
| AK049985_j1      | 1.76111   | 1.4251    | -0.305423     | 0.339294  | 0.679562 |
| AK081136_j4      | 0.131195  | 0.0397296 | -1.72342      | 0.138506  | 1        |
| Igln5_j1         | 0.913642  | 0.380336  | -1.26436      | 0.0150349 | 0.115104 |
| AK134755_j3      | 0.0423733 | 0.0602976 | 0.508947      | 0.701731  | 1        |
| AK134755_j4      | 0.0695176 | 0         | -1.79769e+308 | 0.0592667 | 1        |
| 1700028J19Rik_j4 | 0.106841  | 0.121125  | 0.181027      | 0.890297  | 1        |
| 1700008O03Rik_j1 | 1.0349    | 0         | 0             | 1         | 1        |
| 2310044H10Rik    | 0.765245  | 0.502799  | -0.60594      | 0.0222932 | 0.151997 |
| 2310044H10Rik_j3 | 76.5448   | 80.2654   | 0.0684734     | 0.549025  | 0.814496 |
| Pold1_j4         | 0         | 0.132602  | 0             | 1         | 1        |
| Nr1h2_j2         | 6.57101   | 9.832     | 0             | 1         | 1        |
| Myh14_j8         | 1.51282   | 1.58275   | 0             | 1         | 1        |
| Atf5_j1          | 24.6236   | 34.8015   | 0             | 1         | 1        |
| Tbc1d17_j1       | 0.487238  | 0.694365  | 0             | 1         | 1        |
| Ptov1_j5         | 0         | 0.561025  | 0             | 1         | 1        |
| Ap2a1_j5         | 0         | 0.160067  | 0             | 1         | 1        |
| Prmt1_j2         | 0.898954  | 1.07349   | 0             | 1         | 1        |
| Prmt1_j1         | 0.20746   | 0.367692  | 0             | 1         | 1        |
| Scaf1_j6         | 15.4288   | 22.0524   | 0             | 1         | 1        |

|              |           |                       |           |           |          |
|--------------|-----------|-----------------------|-----------|-----------|----------|
| Scaf1_j7     | 6.88491   | 7.88596               | 0         | 1         | 1        |
| Prr12_j5     | 4.61241   | 4.73969               | 0         | 1         | 1        |
| Fcgrt_j1     | 0.133684  | 0 -1.79769e+308       | 0.0066323 |           | 1        |
| Rps11_j3     | 53.7594   | 61.9297               | 0.204114  | 0.0913113 | 0.37138  |
| Rpl13a_j8    | 20.9001   | 21.4701               | 0.0388172 | 0.794822  | 0.931484 |
| Flt3l_j11    | 0.337783  | 0.679615              | 1.00862   | 0.0368426 | 0.212311 |
| Flt3l_j15    | 0.196642  | 0.446824              | 1.18413   | 0.129465  | 0.448434 |
| Cd37_j5      | 0         | 0.110482 1.79769e+308 | 0.0795377 |           | 1        |
| Trpm4_j2     | 3.49791   | 3.66427               | 0         | 1         | 1        |
| Ppfia3_j1    | 6.50042   | 7.5045                | 0         | 1         | 1        |
| Snrnp70_j2   | 0.847223  | 0.49235               | 0         | 1         | 1        |
| Ruvbl2_j4    | 8.07752   | 11.9424               | 0         | 1         | 1        |
| Ftl1_j3      | 7.64085   | 11.0022               | 0.525985  | 0.0156013 | 0.118086 |
| Dhdh_j3      | 0.760062  | 0.521336              | 0         | 1         | 1        |
| Nucb1_j2     | 5.54597   | 6.23357               | 0         | 1         | 1        |
| Fgf21        | 0.146313  | 0.169978              | 0.216292  | 0.775522  | 0.923813 |
| Sphk2_j1     | 0.1968    | 0.163586              | 0         | 1         | 1        |
| Sphk2        | 3.91501   | 4.56377               | 0         | 1         | 1        |
| Sult2b1_j4   | 0.405293  | 0.211602              | -0.937609 | 0.240106  | 0.587445 |
| Cyth2_j3     | 5.67694   | 8.23696               | 0         | 1         | 1        |
| Grwd1        | 6.67174   | 7.75669               | 0.217378  | 0.114784  | 0.421534 |
| Abcc8_j3     | 2.22581   | 1.4525                | -0.615794 | 0.10456   | 0.40124  |
| Sergef_j3    | 1.44637   | 2.19218               | 0.599929  | 0.0321948 | 0.194595 |
| Saal1_j2     | 0.988003  | 0.697824              | -0.501653 | 0.0821564 | 0.349173 |
| Hps5         | 1.11026   | 1.22701               | 0         | 1         | 1        |
| Tsg101_j5    | 0         | 0.889188 1.79769e+308 | 0.0002651 | 0.0048338 |          |
| XLOC_030427  | 5.02288   | 4.51578               | 0         | 1         | 1        |
| XLOC_030427  | 13.4767   | 10.5949               | 0         | 1         | 1        |
| XLOC_030431  | 1.16595   | 1.1576                | 0         | 1         | 1        |
| XLOC_030431  | 3.61882   | 3.03136               | 0         | 1         | 1        |
| Mrgpra3      | 5.71191   | 4.09582               | 0         | 1         | 1        |
| XLOC_030432  | 0.337151  | 0.346015              | 0         | 1         | 1        |
| XLOC_030433  | 0.0523238 | 0.177587              | 0         | 1         | 1        |
| XLOC_030433  | 0.168389  | 0                     | 0         | 1         | 1        |
| XLOC_030436  | 0.0497287 | 0.0966026             | 0.957983  | 0.676535  | 1        |
| XLOC_030443  | 0.0821223 | 0.0278859             | -1.55824  | 1         | 1        |
| Gabra5       | 1.00685   | 1.24836               | 0         | 1         | 1        |
| Gabra5_j5    | 0.706414  | 0.523036              | 0         | 1         | 1        |
| lpw_j4       | 1.95842   | 1.59399               | -0.297054 | 0.250129  | 0.597712 |
| Snrpn_j6     | 0.222041  | 0.039358              | 0         | 1         | 1        |
| Snrpn_j7     | 0         | 0.15797               | 0         | 1         | 1        |
| Snrpn_j13    | 19.7907   | 19.4932               | 0         | 1         | 1        |
| Klf13_j1     | 1.44186   | 0.343796              | -2.0683   | 1.71E-10  | 1.64E-08 |
| Mphosph10    | 2.08619   | 2.34726               | 0.170102  | 0.416372  | 0.733896 |
| Tjp1_j7      | 2.25091   | 2.52489               | 0.165713  | 0.375483  | 0.707763 |
| Lrrk1_j1     | 0.204206  | 0.297881              | 0.544713  | 0.15955   | 0.493978 |
| AK038598_j10 | 0.0603992 | 0.00916706            | -2.72     | 0.458103  | 1        |

|                  |           |                 |            |           |           |
|------------------|-----------|-----------------|------------|-----------|-----------|
| Lrrc28_j1        | 0.0454721 | 0.192224        | 0          | 1         | 1         |
| AK014683_j2      | 0.070008  | 0.0326635       | -1.09984   | 0.580088  | 1         |
| XLOC_030489      | 0.0556217 | 0.090336        | 0.699653   | 0.729029  | 1         |
| Mctp2_j4         | 0.0964464 | 0.0841562       | 0          | 1         | 1         |
| Chd2_j8          | 4.01557   | 4.02766         | 0.00433991 | 0.975047  | 0.992833  |
| Sv2b_j1          | 1.60378   | 1.28951         | 0          | 1         | 1         |
| Sv2b_j2          | 0.553361  | 0.274651        | 0          | 1         | 1         |
| Det1_j1          | 0.25831   | 0.446635        | 0.789994   | 0.0347056 | 0.204618  |
| Det1_j4          | 0.191996  | 0.351471        | 0.872328   | 0.0389397 | 0.220034  |
| Det1             | 1.42978   | 1.26574         | -0.175808  | 0.484194  | 0.776305  |
| Hapln3_j2        | 0.167881  | 0.235815        | 0.490217   | 0.400498  | 0.723924  |
| Mfge8_j2         | 0.279937  | 0               | 0          | 1         | 1         |
| Rlbp1            | 0.379142  | 0.60427         | 0          | 1         | 1         |
| Polg_j1          | 1.30394   | 1.35389         | 0          | 1         | 1         |
| Polg_j2          | 0.0637518 | 0.105848        | 0          | 1         | 1         |
| Polg_j5          | 2.66391   | 2.33655         | 0          | 1         | 1         |
| Kif7_j1          | 0.440444  | 0.369883        | -0.25189   | 0.666989  | 0.874037  |
| Idh2_j2          | 2.09342   | 2.19819         | 0          | 1         | 1         |
| Rccd1            | 0.626268  | 0.473524        | 0          | 1         | 1         |
| Unc45a_j3        | 5.27787   | 4.36671         | 0          | 1         | 1         |
| Unc45a           | 9.99247   | 10.1887         | 0          | 1         | 1         |
| Man2a2_j1        | 8.64591   | 12.2284         | 0          | 1         | 1         |
| Fes_j5           | 0.0419114 | 0.0811485       | 0.953223   | 0.557094  | 1         |
| Fes_j7           | 0.168466  | 0.295256        | 0.809514   | 0.0919564 | 0.372915  |
| Furin_j1         | 0.291022  | 0.228876        | 0          | 1         | 1         |
| Blm_j5           | 0.422567  | 0.403204        | -0.0676678 | 0.892061  | 0.965725  |
| Blm_j6           | 0.559311  | 0.530333        | -0.0767522 | 0.78578   | 0.928253  |
| Wdr73            | 3.07779   | 3.03413         | 0          | 1         | 1         |
| Sec11a_j2        | 11.6789   | 14.8879         | 0.350234   | 0.030984  | 0.189775  |
| Rps17_j6         | 0.649692  | 1.19196         | 0.875506   | 0.0327346 | 0.196929  |
| Cpeb1_j4         | 13.3108   | 8.63722         | 0          | 1         | 1         |
| vesl-2_j3        | 0         | 0.332498        | 0          | 1         | 1         |
| 3110040N11Rik_j3 | 0.313252  | 0.179789        | -0.801014  | 0.47323   | 0.770054  |
| 3110040N11Rik_j4 | 1.47201   | 1.84874         | 0.328753   | 0.258359  | 0.607047  |
| Btbd1_j1         | 0.260118  | 0.222977        | -0.22227   | 0.595609  | 0.838891  |
| Fam154b          | 2.68804   | 2.12432         | 0          | 1         | 1         |
| Il16_j3          | 0.149771  | 0 -1.79769e+308 |            | 1.18E-10  | 1.19E-08  |
| 9930013L23Rik_j2 | 0.164647  | 0.355416        | 1.11013    | 0.010144  | 0.0864174 |
| 9930013L23Rik_j7 | 0.0640492 | 0 -1.79769e+308 |            | 0.0014664 | 1         |
| Arnt2_j2         | 7.31568   | 9.14202         | 0          | 1         | 1         |
| Fah_j1           | 0.250633  | 0.488659        | 0          | 1         | 1         |
| Zfand6_j2        | 0.198238  | 0.472963        | 0          | 1         | 1         |
| I7Rn6            | 13.0495   | 14.3679         | 0.138864   | 0.405671  | 0.727324  |
| Ankrd42_j3       | 2.24454   | 2.31581         | 0.0450963  | 0.863471  | 0.956634  |
| Ankrd42          | 0.0532612 | 0.0610133       | 0.196038   | 0.772581  | 1         |
| Usp35            | 1.82873   | 3.77442         | 0          | 1         | 1         |
| 1810020D17Rik    | 6.44987   | 4.51295         | -0.515199  | 0.0299737 | 0.185644  |

|                  |            |            |               |           |           |
|------------------|------------|------------|---------------|-----------|-----------|
| 1810020D17Rik    | 3.59008    | 2.98187    | -0.267797     | 0.414279  | 0.732813  |
| Capn5            | 34.0021    | 29.8073    | 0             | 1         | 1         |
| Acer3_j1         | 0.345472   | 0.359705   | 0.0582468     | 0.854788  | 0.954015  |
| 2210018M11Rik_j5 | 0.699804   | 0.673142   | 0             | 1         | 1         |
| 2210018M11Rik_j6 | 0.201542   | 0.173274   | 0             | 1         | 1         |
| AK052909_j1      | 0          | 0.0766977  | 1.79769e+308  | 0.114961  | 1         |
| Uvrag_j2         | 0.0552661  | 0.0445587  | 0             | 1         | 1         |
| Dgat2_j1         | 0.321215   | 0.0365631  | -3.13508      | 0.0202508 | 0.142102  |
| Neu3             | 0.506517   | 0.403741   | -0.327178     | 0.272285  | 0.621103  |
| Relt_j2          | 0.337827   | 0.15685    | 0             | 1         | 1         |
| Relt_j3          | 1.04882    | 0.210221   | 0             | 1         | 1         |
| Relt             | 4.03267    | 1.16815    | 0             | 1         | 1         |
| P2ry6_j1         | 0.293231   | 1.10148    | 1.90934       | 5.92E-06  | 0.0001962 |
| P2ry2            | 2.43796    | 2.31746    | 0             | 1         | 1         |
| Atg16l2_j7       | 0.0795104  | 0.111805   | 0.491768      | 0.410525  | 1         |
| Atg16l2_j14      | 0.17311    | 0          | -1.79769e+308 | 0.0010563 | 0.0149067 |
| Inpp1            | 0.953982   | 1.01611    | 0             | 1         | 1         |
| Lrrc51           | 1.51093    | 2.01449    | 0.414985      | 0.0439364 | 0.238677  |
| Rnf121_j4        | 2.47369    | 2.57575    | 0             | 1         | 1         |
| Nup98_j1         | 1.34534    | 1.452      | 0             | 1         | 1         |
| Trim68_j1        | 0.741279   | 0.503065   | -0.55927      | 0.257492  | 0.606278  |
| Trim12a_j3       | 0.360421   | 0.375808   | 0.0603103     | 0.902964  | 0.969047  |
| 9230105E10Rik_j2 | 0          | 0.0510199  | 1.79769e+308  | 0.0979679 | 1         |
| 9230105E10Rik_j4 | 0.270397   | 0.158498   | -0.770611     | 0.346351  | 0.685483  |
| Apbb1_j1         | 0.423183   | 0.893448   | 0             | 1         | 1         |
| Apbb1_j2         | 0.0829337  | 0.00202144 | 0             | 1         | 1         |
| Apbb1_j3         | 0.936397   | 0.0319453  | 0             | 1         | 1         |
| Arfip2           | 12.6259    | 14.0202    | 0             | 1         | 1         |
| Rrp8             | 6.34717    | 6.16056    | -0.0430506    | 0.757083  | 0.916197  |
| Dchs1_j5         | 0.129673   | 0.297621   | 1.1986        | 0.0343788 | 0.203282  |
| Cyb5r2_j7        | 0.00511555 | 0.0594596  | 3.53895       | 0.701291  | 1         |
| Stk33_j4         | 0.429902   | 0.150077   | 0             | 1         | 1         |
| Stk33_j5         | 0.292196   | 0.524964   | 0             | 1         | 1         |
| Stk33            | 0.216249   | 0.466499   | 0             | 1         | 1         |
| Gm9105           | 9.5219     | 10.1358    | 0             | 1         | 1         |
| Ascl3_j1         | 0.24259    | 0.236565   | -0.0362783    | 0.941339  | 0.982153  |
| Nrip3_j1         | 19.5229    | 23.8655    | 0             | 1         | 1         |
| Dennd5a_j1       | 2.37712    | 3.04926    | 0             | 1         | 1         |
| Tmem41b_j1       | 3.15       | 3.34895    | 0.0883572     | 0.574406  | 0.828005  |
| Tmem41b_j5       | 1.03551    | 1.02018    | -0.0215248    | 0.948558  | 0.98513   |
| Sbf2_j1          | 1.41579    | 2.42269    | 0             | 1         | 1         |
| Sbf2_j6          | 0.771137   | 0.93101    | 0             | 1         | 1         |
| Rnf141_j1        | 6.62487    | 6.52856    | 0             | 1         | 1         |
| Rnf141_j6        | 0.171614   | 0.11251    | 0             | 1         | 1         |
| Lyve1_j1         | 0.380478   | 0.375116   | -0.0204746    | 0.962327  | 0.989496  |
| Mrv1_j1          | 0.815      | 0.566379   | -0.525032     | 0.064736  | 0.30253   |
| Eif4g2_j3        | 4.92819    | 6.25969    | 0             | 1         | 1         |

|                  |           |           |               |           |           |
|------------------|-----------|-----------|---------------|-----------|-----------|
| Eif4g2_j4        | 0.0248849 | 0.0519067 | 0             | 1         | 1         |
| Galnt14_j2       | 0.882735  | 2.55608   | 0             | 1         | 1         |
| AK009335_j2      | 0.228518  | 0.310294  | 0.441326      | 0.171058  | 0.507955  |
| AK009335_j1      | 0.172392  | 0.197679  | 0.197468      | 0.8181    | 0.940994  |
| Btbd10_j3        | 6.46231   | 4.26108   | 0             | 1         | 1         |
| Calca_j10        | 0.896624  | 1.61421   | 0             | 1         | 1         |
| Calca_j11        | 23.2393   | 33.1924   | 0             | 1         | 1         |
| Calca            | 0.851987  | 1.2396    | 0             | 1         | 1         |
| Rps15a_j4        | 0.553483  | 0.226258  | 0             | 1         | 1         |
| Rps15a_j3        | 0         | 0.221542  | 0             | 1         | 1         |
| Smg1_j1          | 7.5427    | 8.06656   | 0.0968723     | 0.356633  | 0.692586  |
| Smg1_j2          | 2.64164   | 2.40044   | -0.138136     | 0.258273  | 0.60698   |
| Smg1_j3          | 0.850645  | 0.701038  | -0.279065     | 0.430418  | 0.743173  |
| Tmc7_j1          | 2.6298    | 3.75756   | 0             | 1         | 1         |
| Gde1_j4          | 21.9083   | 25.1569   | 0             | 1         | 1         |
| 2310008H09Rik_j1 | 0.112651  | 0.0499165 | 0             | 1         | 1         |
| XLOC_030686      | 0.0471697 | 0         | -1.79769e+308 | 0.049606  | 1         |
| XLOC_030686      | 0.336759  | 0.0873788 | -1.94636      | 0.0590376 | 0.28563   |
| Dcun1d3_j1       | 0.0614523 | 0.0656884 | 0.0961716     | 0.873492  | 1         |
| AK018490         | 1.7162    | 1.33109   | -0.366608     | 0.110156  | 0.412969  |
| Ndufab1_j2       | 0.805769  | 0.477272  | 0             | 1         | 1         |
| Arhgap17         | 4.334     | 3.96584   | 0             | 1         | 1         |
| Zkscan2_j5       | 0.167377  | 0.234155  | 0.48436       | 0.458873  | 0.761335  |
| Nsmce1_j1        | 2.85729   | 2.29681   | -0.315019     | 0.280238  | 0.629039  |
| Xpo6_j2          | 0.339242  | 0.445659  | 0             | 1         | 1         |
| Xpo6_j3          | 1.68881   | 2.45576   | 0             | 1         | 1         |
| AK043947_j1      | 0         | 0.0617362 | 0             | 1         | 1         |
| AK043947         | 0.591833  | 0.390187  | 0             | 1         | 1         |
| Lat_j2           | 0.136865  | 0.0916944 | -0.577847     | 0.630473  | 1         |
| Spns1_j2         | 2.21376   | 3.36147   | 0.602591      | 0.0751649 | 0.330958  |
| Nfatc2ip         | 0.917924  | 0.758484  | -0.275254     | 0.30599   | 0.651373  |
| Sh2b1_j3         | 0.901187  | 0.676993  | 0             | 1         | 1         |
| Sh2b1_j2         | 3.43828   | 1.7379    | 0             | 1         | 1         |
| Sh2b1            | 2.28009   | 4.48362   | 0             | 1         | 1         |
| Atxn2l_j6        | 0.400264  | 0.495097  | 0             | 1         | 1         |
| Atxn2l_j5        | 9.79021   | 12.2382   | 0             | 1         | 1         |
| Atxn2l           | 4.65316   | 5.24534   | 0             | 1         | 1         |
| Cln3_j1          | 4.35772   | 5.23007   | 0.263259      | 0.13579   | 0.458482  |
| Coro1a_j8        | 51.0603   | 51.2159   | 0.00439001    | 0.963086  | 0.989724  |
| Taok2_j4         | 2.48389   | 3.16311   | 0.348739      | 0.0049536 | 0.0503825 |
| Taok2_j5         | 2.88173   | 2.66027   | -0.115364     | 0.359041  | 0.694329  |
| Mvp_j11          | 8.47912   | 8.81096   | 0             | 1         | 1         |
| Maz_j3           | 11.763    | 22.2245   | 0             | 1         | 1         |
| Maz_j4           | 22.5229   | 23.6676   | 0             | 1         | 1         |
| Kif22_j1         | 2.28777   | 7.43659   | 0             | 1         | 1         |
| Kif22_j2         | 0.352977  | 0.363201  | 0             | 1         | 1         |
| Qprt_j1          | 0.111832  | 0.29839   | 1.41586       | 0.0871847 | 0.361107  |

|                  |             |                       |             |           |          |
|------------------|-------------|-----------------------|-------------|-----------|----------|
| Cd2bp2_j1        | 3.41998     | 5.97779               | 0           | 1         | 1        |
| Zfp747_j1        | 0.217569    | 0.111954              | -0.958562   | 0.198692  | 0.541904 |
| E430018J23Rik_j1 | 0.196734    | 0.314554              | 0.677061    | 0.297171  | 0.643783 |
| Gm166            | 0.328799    | 0.276763              | -0.248552   | 0.394214  | 0.719811 |
| Gm166_j2         | 0.377287    | 0.253695              | -0.572566   | 0.0799165 | 0.343618 |
| XLOC_030751      | 0.0832748   | 0.0697451             | -0.255788   | 0.852113  | 1        |
| Zfp668_j4        | 0.738944    | 0.52971               | -0.480263   | 0.0567102 | 0.278572 |
| Prss53_j5        | 0.213152    | 0.234998              | 0.140764    | 0.691337  | 0.885702 |
| Prss36           | 1.96111     | 1.54666               | -0.342512   | 0.342868  | 0.682746 |
| Prss36_j1        | 2.77133     | 2.41955               | -0.195838   | 0.527175  | 0.801445 |
| Cox6a2           | 0.183867    | 0.238923              | 0.377884    | 0.718134  | 0.898528 |
| Nsmce4a_j1       | 14.2341     | 14.7917               | 0.0554309   | 0.691538  | 0.885739 |
| 2310057M21Rik    | 0.193167    | 0.173581              | -0.154233   | 0.694063  | 0.887065 |
| Chst15           | 0.90436     | 0.625553              | 0           | 1         | 1        |
| AK080057_j2      | 0.220199    | 0.199349              | -0.143509   | 0.848571  | 0.952118 |
| Mettl10_j7       | 0.932064    | 0.71309               | -0.386345   | 0.136376  | 0.459374 |
| Mettl10          | 2.34222     | 1.58339               | -0.564864   | 0.0638074 | 0.299602 |
| Ctbp2_j7         | 1.70434     | 2.04747               | 0           | 1         | 1        |
| Uros             | 3.02156     | 3.01839               | 0           | 1         | 1        |
| Dhx32_j1         | 3.49585     | 4.69066               | 0           | 1         | 1        |
| Dhx32            | 3.89705     | 3.68307               | 0           | 1         | 1        |
| D7Ertd443e_j7    | 0.0520703   | 0 -1.79769e+308       | 0.0364365   |           | 1        |
| D7Ertd443e_j3    | 0.000971447 | 0.392935              | 8.65994     | 0.262671  | 0.611657 |
| Ebf3_j9          | 2.13069     | 2.87568               | 0           | 1         | 1        |
| Ebf3_j10         | 1.94635     | 1.75845               | 0           | 1         | 1        |
| Ebf3_j11         | 1.30984     | 1.24841               | 0           | 1         | 1        |
| 9430038I01Rik    | 0.254143    | 0.272041              | 0.0981846   | 0.828677  | 0.944654 |
| Mapk1ip1         | 5.00438     | 4.7378                | 0           | 1         | 1        |
| Bnip3_j5         | 1.5839      | 0.903721              | 0           | 1         | 1        |
| Stk32c_j2        | 0.523641    | 0.233386              | 0           | 1         | 1        |
| Adam8_j5         | 0.761864    | 4.6606                | 2.61291     | 0         | 0        |
| Adam8            | 0           | 0.919076 1.79769e+308 | 7.97E-13    | 1.15E-10  |          |
| Tubgcp2_j1       | 7.21892     | 7.48407               | 0.0520407   | 0.691101  | 0.885697 |
| 1810014F10Rik    | 1.94129     | 1.93994               | -0.00100949 | 0.996929  | 0.999143 |
| Sigirr_j7        | 0.164657    | 0.0964519             | -0.77158    | 0.466516  | 0.766112 |
| Rnh1             | 8.88146     | 10.872                | 0.291755    | 0.0423835 | 0.232763 |
| Hras1_j3         | 1.07938     | 0.779208              | -0.470118   | 0.312935  | 0.657313 |
| Hras1            | 4.10516     | 5.28329               | 0.364       | 0.0924584 | 0.374117 |
| B230206H07Rik_j2 | 0.71851     | 0.414761              | -0.79273    | 0.0127411 | 0.102486 |
| Slc25a22_j14     | 1.61458     | 1.34576               | 0           | 1         | 1        |
| Slc25a22_j13     | 1.84695     | 1.51917               | 0           | 1         | 1        |
| RP23-118G3.2_j2  | 0.221784    | 0.203313              | -0.125454   | 0.879571  | 0.96152  |
| Dusp8_j2         | 1.51033     | 0.934019              | 0           | 1         | 1        |
| AK145379         | 1.34065     | 1.57926               | 0.236319    | 0.268612  | 0.61759  |
| Th_j1            | 8.85759     | 9.52009               | 0           | 1         | 1        |
| Th               | 22.0835     | 17.5119               | 0           | 1         | 1        |
| Cdkn1c_j4        | 0.102129    | 0.0731413             | -0.481637   | 0.690451  | 1        |



|                  |           |                       |            |           |           |
|------------------|-----------|-----------------------|------------|-----------|-----------|
| Cdkn1c           | 0.15484   | 0.201499              | 0.379997   | 0.620861  | 0.851388  |
| Cdkn1c_j3        | 0.177306  | 0.168514              | -0.0733735 | 0.925484  | 0.976854  |
| Nap1l4_j1        | 1.2146    | 0.314038              | 0          | 1         | 1         |
| Nap1l4_j2        | 4.42512   | 0                     | 0          | 1         | 1         |
| Cars_j4          | 1.00518   | 2.1433                | 0          | 1         | 1         |
| Cars_j5          | 3.27358   | 5.28778               | 0          | 1         | 1         |
| Tnfrsf22         | 0.156202  | 0.000160785           | -9.92407   | 0.865159  | 0.957045  |
| Osbpl5           | 8.20594   | 9.78267               | 0          | 1         | 1         |
| Mrgpre_j2        | 0.587079  | 0.00102233            | 0          | 1         | 1         |
| Mrgpre_j1        | 0.0119941 | 0.923837              | 0          | 1         | 1         |
| Nadsyn1_j7       | 0.0573804 | 0 -1.79769e+308       | 0.0246612  | 1         | 1         |
| Cttm_j6          | 4.39696   | 7.56239               | 0          | 1         | 1         |
| Cttm_j7          | 1.0694    | 1.02378               | 0          | 1         | 1         |
| Cttm_j8          | 0.167165  | 1.67475               | 0          | 1         | 1         |
| Ppfia1_j1        | 0.886326  | 1.06038               | 0          | 1         | 1         |
| Ccnd1_j1         | 0         | 0.186783 1.79769e+308 | 0.0006685  | 0.0103512 | 0.0103512 |
| Tpcn2_j3         | 0.241726  | 0.327675              | 0.438892   | 0.662336  | 0.871966  |
| Prkcc_j1         | 0.254218  | 0.114383              | -1.1522    | 0.148696  | 0.477528  |
| Cacng7_j3        | 1.64815   | 1.08659               | -0.601043  | 0.292655  | 0.63964   |
| Cacng8_j4        | 0.535789  | 0.427406              | -0.326057  | 0.71035   | 0.894482  |
| Prpf31_j2        | 6.28361   | 6.41347               | 0          | 1         | 1         |
| Cnot3_j5         | 1.92115   | 2.44224               | 0.34623    | 0.046534  | 0.247371  |
| Cnot3_j4         | 0.414281  | 0.485003              | 0.227382   | 0.504137  | 0.787468  |
| Rps9_j3          | 31.9002   | 30.8972               | -0.0460892 | 0.682474  | 0.880856  |
| Leng8_j6         | 1.16101   | 0.689264              | 0          | 1         | 1         |
| Lilra5_j4        | 0.069807  | 0.0506412             | -0.46306   | 0.755739  | 1         |
| Eps8l1_j5        | 0.573434  | 0.73432               | 0          | 1         | 1         |
| Suv420h2_j4      | 0.0805523 | 0.0873489             | 0.116863   | 0.900352  | 1         |
| Isoc2a_j3        | 0.44467   | 0.145292              | -1.61378   | 0.197438  | 0.540321  |
| Nat14_j1         | 2.14912   | 0.932146              | 0          | 1         | 1         |
| A430110N23Rik_j3 | 0.328683  | 0.293987              | -0.160943  | 0.728263  | 0.903676  |
| Zfp865_j2        | 0.669165  | 0.70951               | 0          | 1         | 1         |
| Zfp580           | 0.353014  | 0.447349              | 0          | 1         | 1         |
| U2af2_j9         | 5.67665   | 7.07597               | 0          | 1         | 1         |
| Epn1_j5          | 2.63532   | 2.72321               | 0          | 1         | 1         |
| Epn1_j8          | 0.0553606 | 0.202661              | 0          | 1         | 1         |
| Zfp78_j4         | 0.122693  | 0.077716              | -0.658764  | 0.387037  | 1         |
| Zfp28            | 0.0933808 | 0.0264149             | -1.82177   | 0.151035  | 1         |
| Zfp110_j2        | 4.36567   | 4.27722               | 0          | 1         | 1         |
| Zscan22          | 0.229224  | 0.112126              | -1.03163   | 0.134918  | 0.457099  |
| Zscan22          | 0.295788  | 0.369406              | 0.320645   | 0.450806  | 0.756294  |
| Zscan22          | 0.365664  | 0.120705              | -1.59903   | 0.0197595 | 0.139688  |
| Rps5_j2          | 189.565   | 217.856               | 0.200685   | 0.0240379 | 0.159942  |
| Zfp446_j4        | 0.116881  | 0 -1.79769e+308       | 6.27E-05   | 1         | 1         |
| Napa_j1          | 19.0384   | 14.411                | 0          | 1         | 1         |
| Napa_j5          | 76.6833   | 89.1989               | 0          | 1         | 1         |
| Meis3_j1         | 3.43992   | 3.45953               | 0.00820182 | 0.966554  | 0.990403  |

|                  |           |            |               |           |           |
|------------------|-----------|------------|---------------|-----------|-----------|
| Prkd2_j2         | 0.15555   | 0.160398   | 0.0442805     | 0.94166   | 0.982193  |
| Gng8_j2          | 0.607961  | 0.00110949 | 0             | 1         | 1         |
| Pnmal1           | 2.26081   | 2.3405     | 0             | 1         | 1         |
| Psg16            | 0         | 0.131043   | 1.79769e+308  | 0.0112271 | 1         |
| Psg16_j1         | 0.138581  | 0.126319   | -0.133652     | 0.87335   | 0.959842  |
| XLOC_029516      | 0.0545768 | 0.00521421 | -3.38777      | 0.588752  | 1         |
| Mypop_j1         | 1.74096   | 0.863578   | 0             | 1         | 1         |
| Snrpd2_j1        | 12.6635   | 17.0699    | 0             | 1         | 1         |
| Eml2             | 75.1801   | 77.5603    | 0.0449686     | 0.610686  | 0.846532  |
| Rtn2_j1          | 18.4549   | 20.2685    | 0             | 1         | 1         |
| Ercc1_j1         | 4.55571   | 4.92509    | 0.112477      | 0.617028  | 0.849275  |
| Ppp1r13l         | 0.176608  | 0          | -1.79769e+308 | 2.23E-05  | 0.0006037 |
| Ercc2_j1         | 0.139084  | 0          | -1.79769e+308 | 0.0003105 | 0.0054955 |
| Ckm_j1           | 0.150796  | 0.130365   | -0.210048     | 0.830351  | 0.945391  |
| Nkpd1_j2         | 0.102706  | 0.0293287  | -1.80814      | 0.219022  | 1         |
| Nkpd1_j4         | 0.0922935 | 0          | -1.79769e+308 | 0.0104893 | 1         |
| AK043814         | 0.478873  | 0.38607    | 0             | 1         | 1         |
| Zfp235_j1        | 0.281136  | 0.248635   | 0             | 1         | 1         |
| Kcnn4_j1         | 0.772933  | 0.968604   | 0             | 1         | 1         |
| XLOC_029551      | 0.164989  | 0.195974   | 0.248289      | 0.661351  | 0.871639  |
| 1500002O20Rik    | 0.137022  | 0.18643    | 0.444231      | 0.393789  | 0.71963   |
| 1500002O20Rik_j7 | 0.990863  | 1.06038    | 0.097822      | 0.837135  | 0.947892  |
| Xrcc1            | 5.72289   | 6.52773    | 0.189836      | 0.153994  | 0.486892  |
| Arhgef1_j6       | 3.13732   | 2.98636    | 0             | 1         | 1         |
| Arhgef1_j12      | 0.196507  | 0          | 0             | 1         | 1         |
| Cic_j3           | 9.17169   | 9.62748    | 0             | 1         | 1         |
| Cic              | 16.8191   | 18.2972    | 0             | 1         | 1         |
| Cic_j8           | 17.5144   | 25.3012    | 0             | 1         | 1         |
| Megf8_j7         | 0.271263  | 0.0646259  | -2.06951      | 0.0021091 | 0.0260581 |
| Atp5sl_j1        | 0.632087  | 0.499839   | -0.33866      | 0.361442  | 0.696082  |
| Gm8946           | 1.03892   | 0.78774    | -0.3993       | 0.309689  | 0.654275  |
| 2310022A10Rik    | 3.80408   | 3.91222    | 0.0404413     | 0.807736  | 0.936674  |
| 2310022A10Rik_j2 | 1.40273   | 1.60114    | 0.190862      | 0.670643  | 0.875428  |
| Akt2_j7          | 0.129089  | 0.165976   | 0.362608      | 0.728099  | 0.903661  |
| Akt2_j12         | 0.278443  | 0.173509   | -0.68237      | 0.214331  | 0.559705  |
| Akt2_j14         | 0.664697  | 0.578387   | -0.200662     | 0.506014  | 0.788576  |
| Zfp60_j2         | 5.21679   | 5.36583    | 0.0406389     | 0.742926  | 0.909993  |
| 4933426l21Rik    | 1.01711   | 1.20288    | 0.242015      | 0.233681  | 0.581007  |
| 9530053A07Rik_j2 | 0.0800339 | 0          | -1.79769e+308 | 0.0048831 | 1         |
| 9530053A07Rik_j3 | 0.119219  | 0.119512   | 0.00354048    | 0.996378  | 1         |
| Paf1             | 2.29877   | 2.13979    | -0.103395     | 0.559641  | 0.82079   |
| Lrfn1            | 2.68055   | 2.02046    | 0             | 1         | 1         |
| Fbxo27_j1        | 0.332871  | 0.198822   | -0.743485     | 0.195097  | 0.537411  |
| Fbxo17           | 0.330109  | 0.398363   | 0.27114       | 0.590506  | 0.83665   |
| Fbxo17_j6        | 0.122332  | 0.346731   | 1.50301       | 0.138738  | 0.463211  |
| Hnrnp1_j2        | 1.38578   | 1.52889    | 0             | 1         | 1         |
| Lgals7_j2        | 0.282318  | 0          | -1.79769e+308 | 0.014729  | 0.113385  |

|               |            |                 |            |           |           |
|---------------|------------|-----------------|------------|-----------|-----------|
| Rasgrp4_j4    | 0.202861   | 0.259221        | 0.353687   | 0.40831   | 0.728624  |
| Ggn_j1        | 0.269831   | 0.272211        | 0.0126722  | 0.976511  | 0.993156  |
| Zfp30_j5      | 0.280721   | 0.0722352       | -1.95836   | 0.0172321 | 0.127016  |
| Zfp30_j4      | 0.346998   | 0.278566        | -0.31691   | 0.477787  | 0.77269   |
| Zfp790_j5     | 0.879437   | 0.0408356       | 0          | 1         | 1         |
| XLOC_029625   | 0.230526   | 0.0442296       | -2.38184   | 0.262611  | 0.611643  |
| Clip3_j3      | 77.8244    | 81.6728         | 0          | 1         | 1         |
| Alkbh6_j1     | 0.25406    | 0.132162        | -0.942863  | 0.486393  | 0.777646  |
| AI428936_j4   | 0.458644   | 0.555011        | 0.275142   | 0.512758  | 0.7923    |
| Nfkbid_j4     | 0.0945916  | 0.0103281       | -3.19514   | 0.158122  | 1         |
| Hspb6         | 6.35983    | 3.73167         | 0          | 1         | 1         |
| AK049951_j1   | 0.623359   | 0.409348        | -0.606737  | 0.124612  | 0.439858  |
| XLOC_029650   | 0.209321   | 0.226605        | 0.11446    | 0.742627  | 0.90994   |
| XLOC_029652   | 0.131546   | 0.144714        | 0.137636   | 0.900179  | 1         |
| Pepd_j2       | 3.75239    | 3.6162          | 0          | 1         | 1         |
| Rhpn2_j1      | 0.627721   | 0.584118        | -0.103863  | 0.710515  | 0.89462   |
| Ccdc123_j2    | 0.455762   | 0.370588        | -0.298467  | 0.508162  | 0.790116  |
| Ankrd27_j1    | 0.00735653 | 0.385815        | 5.71274    | 0.002758  | 0.0322439 |
| Tshz3         | 1.45362    | 1.40915         | 0          | 1         | 1         |
| Tshz3_j1      | 1.10648    | 0               | 0          | 1         | 1         |
| Tshz3_j2      | 1.28438    | 0.0381498       | 0          | 1         | 1         |
| Tshz3_j5      | 1.25628    | 1.48542         | 0          | 1         | 1         |
| XLOC_029660   | 0.137504   | 0 -1.79769e+308 |            | 0.0046137 | 0.0477981 |
| AK034698_j1   | 0.203035   | 6.34E-05        | -11.645    | 0.886028  | 0.963781  |
| XLOC_029663   | 0.139395   | 0.0863583       | -0.690771  | 0.377482  | 0.70922   |
| Etfb_j3       | 0.393141   | 0 -1.79769e+308 |            | 0.0010935 | 0.0153253 |
| Vsig10l_j1    | 0.165107   | 0.385952        | 1.22502    | 0.0438824 | 0.238521  |
| Vsig10l_j3    | 0.8384     | 0.780865        | -0.102566  | 0.72507   | 0.902338  |
| Zfp658_j2     | 0.656823   | 0.236229        | -1.47532   | 0.000491  | 0.0080248 |
| XLOC_029691   | 0.184077   | 0.0239249       | -2.94373   | 0.244922  | 0.592357  |
| 2410002F23Rik | 2.84313    | 2.69314         | 0          | 1         | 1         |
| Shank1_j2     | 0.235264   | 0.0907598       | -1.37415   | 0.0038861 | 0.0420441 |
| Shank1_j1     | 0.125594   | 0 -1.79769e+308 |            | 6.74E-08  | 1         |
| Syt3_j3       | 0.35574    | 0.25954         | 0          | 1         | 1         |
| Syt3_j6       | 0.267511   | 0               | 0          | 1         | 1         |
| Lrrc4b_j2     | 0.125891   | 0 -1.79769e+308 |            | 0.001909  | 1         |
| Aspdh_j5      | 2.13654    | 2.06604         | -0.0484082 | 0.801007  | 0.933726  |
| Josd2_j6      | 6.45756    | 6.54416         | 0.0192205  | 0.923689  | 0.976223  |
| Napsa_j4      | 0.0860466  | 0.0526481       | -0.708738  | 0.482381  | 1         |
| Napsa_j6      | 0.0479088  | 0 -1.79769e+308 |            | 0.110432  | 1         |
| Kcnc3_j1      | 2.05124    | 0.909789        | -1.17289   | 6.54E-07  | 2.87E-05  |
| Akt1s1_j1     | 3.36806    | 1.04515         | -1.68821   | 4.53E-06  | 0.0001546 |
| Nosip_j1      | 7.27094    | 7.95559         | 0          | 1         | 1         |
| Ntn5_j5       | 0.179881   | 0.554361        | 1.62378    | 0.0483154 | 0.25281   |
| Car11_j1      | 0.231912   | 0.279628        | 0          | 1         | 1         |
| Car11_j3      | 0.100565   | 0.0843948       | 0          | 1         | 1         |
| Car11_j2      | 0.448793   | 0.456407        | 0          | 1         | 1         |

|               |           |                 |            |           |           |
|---------------|-----------|-----------------|------------|-----------|-----------|
| Lmtk3_j2      | 0.0512601 | 0.0261775       | 0          | 1         | 1         |
| Lmtk3_j4      | 0.124179  | 0.0397368       | 0          | 1         | 1         |
| AK133391_j4   | 0.191229  | 0.094172        | -1.02193   | 0.23325   | 0.580492  |
| XLOC_029730   | 0.157044  | 0.145925        | -0.105942  | 0.892778  | 0.966115  |
| Kdelr1_j1     | 5.56672   | 6.78257         | 0          | 1         | 1         |
| Kdelr1_j2     | 19.9484   | 21.606          | 0          | 1         | 1         |
| Ccdc114_j3    | 0.1835    | 0.107969        | -0.765162  | 0.309884  | 0.654446  |
| Ccdc114_j8    | 0.0830213 | 0.15194         | 0.871947   | 0.373259  | 1         |
| Ccdc114_j9    | 0.288289  | 0.444973        | 0.626205   | 0.373543  | 0.706422  |
| Nomo1_j2      | 3.37465   | 4.20392         | 0.316996   | 0.0824939 | 0.349978  |
| Kcnc1_j2      | 1.94723   | 0.867669        | 0          | 1         | 1         |
| Tmem86a_j1    | 0.286929  | 0.126211        | -1.18485   | 0.196459  | 0.539231  |
| XLOC_029740   | 0.070078  | 0 -1.79769e+308 |            | 0.119158  | 1         |
| Slc17a6_j1    | 12.8088   | 12.5286         | 0          | 1         | 1         |
| Slc17a6_j2    | 2.16101   | 1.83202         | 0          | 1         | 1         |
| Luzp2_j1      | 1.32168   | 1.17295         | 0          | 1         | 1         |
| Siglech_j1    | 0.125211  | 0.0848375       | -0.561591  | 0.587033  | 1         |
| Gabrb3_j2     | 7.28521   | 3.30526         | 0          | 1         | 1         |
| Atp10a_j1     | 0.249268  | 0.140859        | -0.82344   | 0.119856  | 0.430968  |
| Ube3a_j3      | 4.39432   | 3.98649         | -0.140518  | 0.230702  | 0.577701  |
| XLOC_029771   | 0.482829  | 0 -1.79769e+308 |            | 0.0239839 | 0.159682  |
| XLOC_029771   | 0.0685435 | 0.0398778       | -0.781434  | 0.595207  | 1         |
| Mtmr10_j4     | 0.30938   | 0               | 0          | 1         | 1         |
| Mcee_j3       | 0.501272  | 0.510542        | 0.0264359  | 0.963316  | 0.989786  |
| Apba2_j4      | 1.51357   | 0.982596        | 0          | 1         | 1         |
| Apba2_j6      | 0.0659271 | 0.0488655       | 0          | 1         | 1         |
| Tarsl2_j3     | 3.83215   | 4.53135         | 0          | 1         | 1         |
| Chsy1_j2      | 0.754651  | 1.21008         | 0          | 1         | 1         |
| Lins2_j1      | 0.198543  | 0               | 0          | 1         | 1         |
| Adamts17_j3   | 0.162036  | 0 -1.79769e+308 |            | 0.0024034 | 0.0289385 |
| Lysmd4        | 7.64683   | 7.33501         | -0.0600628 | 0.791894  | 0.930476  |
| Ttc23_j2      | 0.421539  | 0.308341        | 0          | 1         | 1         |
| Ttc23         | 0.140574  | 0.194123        | 0          | 1         | 1         |
| Fam169b_j7    | 0.167345  | 0.10651         | -0.651838  | 0.4161    | 0.733677  |
| BC070425_j9   | 0.264877  | 0.372128        | 0.490476   | 0.453764  | 0.758229  |
| AK035406_j1   | 0.143985  | 0.100274        | -0.521976  | 0.664684  | 0.873063  |
| Akap13_j6     | 0.0693843 | 0.133894        | 0.948412   | 0.0704566 | 1         |
| Klhl25        | 0.920519  | 0.461154        | 0          | 1         | 1         |
| Acan          | 0.152418  | 0.00140288      | -6.7635    | 0.527933  | 0.801822  |
| Abhd2_j4      | 0.163538  | 0.115301        | 0          | 1         | 1         |
| Fanci_j1      | 0.152737  | 0 -1.79769e+308 |            | 0.0297276 | 0.184675  |
| D330012F22Rik | 0.62805   | 0.568474        | 0          | 1         | 1         |
| Ttll13_j2     | 0.115603  | 0.0460069       | 0          | 1         | 1         |
| Vps33b        | 0.253449  | 0.379617        | 0.582847   | 0.2647    | 0.613576  |
| Prc1          | 0.435818  | 1.05023         | 0          | 1         | 1         |
| Pde8a_j2      | 0.202989  | 0 -1.79769e+308 |            | 0.0037509 | 0.0409875 |
| Adamts13_j3   | 0.215316  | 0.140374        | -0.61718   | 0.193125  | 0.535524  |

|                  |           |                 |           |           |           |
|------------------|-----------|-----------------|-----------|-----------|-----------|
| XLOC_029835      | 0.175681  | 0.12311         | -0.513012 | 0.488876  | 0.779314  |
| Eftud1_j1        | 1.5944    | 1.72843         | 0         | 1         | 1         |
| Mex3b_j2         | 0.379275  | 0 -1.79769e+308 |           | 6.83E-08  | 3.89E-06  |
| XLOC_029853      | 0.138668  | 0.157144        | 0.180453  | 0.849479  | 0.952228  |
| E230029C05Rik_j1 | 0.0853087 | 0.0631226       | -0.434537 | 0.75381   | 1         |
| Picalm_j2        | 17.1197   | 15.3225         | -0.160009 | 0.149122  | 0.478226  |
| Odz4_j7          | 0.0639608 | 0 -1.79769e+308 |           | 2.05E-06  | 1         |
| Alg8_j1          | 0.784806  | 0.802072        | 0.0313946 | 0.940306  | 0.981854  |
| Ints4            | 8.57422   | 7.35706         | -0.220875 | 0.0712646 | 0.321007  |
| Rsf1_j1          | 0.187911  | 0.0724573       | -1.37484  | 0.0054768 | 0.054376  |
| Pak1_j2          | 0.337252  | 0.528685        | 0.648581  | 0.164547  | 0.500567  |
| Lrrc32_j2        | 0.0852401 | 0.200682        | 1.23531   | 0.0438985 | 0.238536  |
| Prkrir_j4        | 5.36743   | 4.86415         | 0         | 1         | 1         |
| Wnt11_j3         | 0.121119  | 0.0440041       | -1.46071  | 0.296832  | 1         |
| Wnt11_j4         | 0.257633  | 0.237246        | -0.118935 | 0.871309  | 0.959126  |
| Gdpd5_j2         | 5.00055   | 3.55081         | -0.493939 | 0.0137136 | 0.107918  |
| Arrb1            | 7.90599   | 8.11489         | 0         | 1         | 1         |
| Arrb1_j3         | 1.34906   | 0               | 0         | 1         | 1         |
| Arrb1_j7         | 1.04191   | 0.292472        | 0         | 1         | 1         |
| Xrra1_j1         | 0.103625  | 0.0519329       | -0.996656 | 0.625317  | 1         |
| Pgm2l1_j2        | 8.4903    | 2.93211         | 0         | 1         | 1         |
| P4ha3_j2         | 0.319066  | 0.179229        | -0.832054 | 0.424884  | 0.740178  |
| C2cd3_j1         | 0.325992  | 1.00859         | 0         | 1         | 1         |
| Ucp2             | 34.5433   | 42.057          | 0.283942  | 0.0031079 | 0.035433  |
| Fchsd2_j1        | 0.94923   | 1.60829         | 0         | 1         | 1         |
| Fchsd2_j2        | 2.01601   | 1.75638         | 0         | 1         | 1         |
| Pde2a_j3         | 13.4192   | 15.2281         | 0.182431  | 0.117883  | 0.427206  |
| Clpb_j2          | 2.26403   | 2.83823         | 0         | 1         | 1         |
| Clpb_j3          | 1.63546   | 1.99534         | 0         | 1         | 1         |
| Clpb_j6          | 0.0802864 | 0.0902999       | 0         | 1         | 1         |
| 3200002M19Rik_j6 | 0         | 0.262801        | 0         | 1         | 1         |
| 2400001E08Rik_j1 | 0.486016  | 0.537182        | 0.144405  | 0.825308  | 0.943699  |
| Pgap2            | 0.0537489 | 0.0754466       | 0         | 1         | 1         |
| Stim1_j2         | 1.9537    | 1.90581         | 0         | 1         | 1         |
| Stim1_j5         | 6.32401   | 7.54527         | 0         | 1         | 1         |
| Olf258_j1        | 0.132407  | 0.133223        | 0.0088681 | 0.992335  | 1         |
| Trim34a_j4       | 0.0652554 | 0.0211714       | -1.62398  | 0.378034  | 1         |
| Dnhd1_j3         | 0.167492  | 0 -1.79769e+308 |           | 0.0006866 | 0.0105603 |
| Dnhd1_j2         | 0.135343  | 0.19353         | 0.515932  | 0.367062  | 0.700519  |
| XLOC_029922      | 0.0689731 | 0.0386032       | -0.837312 | 0.538892  | 1         |
| Rpl27a_j2        | 2.28073   | 2.18628         | 0         | 1         | 1         |
| Rpl27a_j3        | 0.521489  | 0.486219        | 0         | 1         | 1         |
| Ampd3_j3         | 1.48563   | 1.45623         | 0         | 1         | 1         |
| Ctr9_j2          | 4.93173   | 6.66291         | 0.434059  | 0.0061483 | 0.059693  |
| Usp47_j3         | 0.182811  | 0.0845555       | -1.11238  | 0.0802965 | 0.344616  |
| Far1_j1          | 5.25223   | 4.37045         | 0         | 1         | 1         |
| Calcb_j1         | 33.7402   | 31.3638         | 0         | 1         | 1         |

|                  |           |                 |             |           |          |
|------------------|-----------|-----------------|-------------|-----------|----------|
| Insc_j1          | 1.30787   | 1.15697         | -0.176868   | 0.581779  | 0.832536 |
| Insc_j2          | 1.95852   | 2.63827         | 0.429829    | 0.047505  | 0.250247 |
| Insc_j3          | 2.25007   | 2.3384          | 0.0555486   | 0.869438  | 0.958459 |
| XLOC_029958      | 0.173098  | 0.152954        | -0.178496   | 0.846808  | 0.951509 |
| AK045786         | 0.484433  | 0.37891         | -0.354439   | 0.642672  | 0.862182 |
| 9030624J02Rik_j1 | 15.8594   | 16.7988         | 0           | 1         | 1        |
| 2610020H08Rik_j1 | 0.201849  | 0.0884147       | -1.19092    | 0.456772  | 0.760049 |
| Lyrn1_j4         | 4.30139   | 4.01106         | 0           | 1         | 1        |
| Mettl9_j2        | 5.92176   | 8.04189         | 0.441507    | 0.0246167 | 0.162606 |
| Hs3st2_j1        | 5.0967    | 2.30449         | 0           | 1         | 1        |
| Ubfd1_j1         | 12.9874   | 13.3585         | 0           | 1         | 1        |
| Plk1_j1          | 2.63792   | 3.42105         | 0.375041    | 0.372965  | 0.705812 |
| Plk1_j2          | 11.7407   | 11.6671         | -0.00906493 | 0.967706  | 0.990878 |
| Plk1_j10         | 0.0527329 | 0 -1.79769e+308 |             | 0.0460419 | 1        |
| Rbbp6_j7         | 2.91397   | 3.385           | 0           | 1         | 1        |
| Tnrc6a_j4        | 5.07134   | 5.60918         | 0           | 1         | 1        |
| Tnrc6a_j7        | 3.10343   | 3.14642         | 0           | 1         | 1        |
| XLOC_029992      | 0.221795  | 0.0493282       | -2.16874    | 0.237582  | 0.584379 |
| Jmjd5            | 0.345029  | 0.352113        | 0           | 1         | 1        |
| Jmjd5_j4         | 1.34909   | 1.07347         | 0           | 1         | 1        |
| Il21r_j3         | 0.0684315 | 0 -1.79769e+308 |             | 0.0244147 | 1        |
| D430042O09Rik_j1 | 0.178732  | 0.167283        | 0           | 1         | 1        |
| D430042O09Rik    | 0.611255  | 0.705057        | 0           | 1         | 1        |
| D430042O09Rik    | 1.07662   | 0.810903        | 0           | 1         | 1        |
| Rabep2           | 3.8648    | 4.25209         | 0.13778     | 0.392127  | 0.718479 |
| Tufm_j3          | 1.11714   | 0.956206        | -0.224418   | 0.432366  | 0.744232 |
| Gdpd3_j2         | 17.2098   | 18.9087         | 0.135824    | 0.212786  | 0.557725 |
| Mapk3_j1         | 0.405973  | 0.389647        | -0.059217   | 0.937965  | 0.980993 |
| Tbx6_j5          | 0.538844  | 0.731282        | 0.440562    | 0.124914  | 0.440286 |
| Sez6l2_j2        | 10.1793   | 9.45903         | 0           | 1         | 1        |
| Sez6l2           | 28.0889   | 29.9841         | 0           | 1         | 1        |
| Mylpf_j1         | 0.251251  | 0.19955         | -0.332379   | 0.612067  | 0.847241 |
| Mylpf            | 0.0981192 | 0.134762        | 0.457809    | 0.667587  | 1        |
| Zfp553           | 3.70687   | 3.88452         | 0.0675355   | 0.648086  | 0.864393 |
| Itgal_j5         | 0.12996   | 0 -1.79769e+308 |             | 0.0250954 | 1        |
| Fbrs_j2          | 2.43063   | 2.50014         | 0.0406823   | 0.865029  | 0.957021 |
| Fbrs_j3          | 0.690894  | 0.363099        | -0.928103   | 0.182281  | 0.52277  |
| Srcap_j6         | 0.733971  | 0.258079        | -1.50791    | 3.57E-08  | 2.18E-06 |
| Fbxl19_j1        | 0.343129  | 0.125112        | 0           | 1         | 1        |
| Fbxl19_j6        | 0.101507  | 0.0414434       | 0           | 1         | 1        |
| Fbxl19_j10       | 6.36249   | 7.13953         | 0           | 1         | 1        |
| Setd1a_j2        | 0.811002  | 0.800939        | 0           | 1         | 1        |
| Setd1a_j8        | 1.51774   | 1.69086         | 0           | 1         | 1        |
| Zfp646_j1        | 0.162917  | 0.127917        | -0.348934   | 0.435425  | 0.74626  |
| Bckdk_j3         | 0.130162  | 0.16651         | 0.355294    | 0.427865  | 0.741888 |
| Bckdk_j4         | 1.0466    | 1.02968         | -0.0235059  | 0.90192   | 0.968734 |
| Myst1_j1         | 2.65111   | 3.94202         | 0.572341    | 0.0162497 | 0.121783 |

|                  |           |           |               |           |           |
|------------------|-----------|-----------|---------------|-----------|-----------|
| Trim72_j3        | 0.103232  | 0         | -1.79769e+308 | 0.0061563 | 1         |
| Trim72_j5        | 0.0533843 | 0.167667  | 1.65111       | 0.151625  | 0.482947  |
| Tgfb1i1_j1       | 1.87718   | 2.34855   | 0.323204      | 0.0517446 | 0.263807  |
| Ppapdc1a_j5      | 2.33511   | 1.57109   | -0.571722     | 0.145577  | 0.473519  |
| Tacc2_j7         | 5.39608   | 5.34571   | 0             | 1         | 1         |
| Tacc2_j9         | 2.54603   | 1.39674   | 0             | 1         | 1         |
| Plekha1_j3       | 1.01629   | 0.153513  | -2.72688      | 0.0043332 | 0.0455957 |
| Htra1_j2         | 53.9787   | 43.7984   | -0.301511     | 0.0045307 | 0.0471542 |
| Bub3_j1          | 2.47027   | 1.98696   | -0.314105     | 0.247739  | 0.595075  |
| XLOC_030053      | 0.101275  | 0.0544254 | -0.895931     | 0.504122  | 1         |
| Lhpp_j1          | 0.247047  | 0.0505809 | -2.28812      | 0.113834  | 0.419484  |
| Zranb1_j4        | 4.13753   | 3.65829   | 0             | 1         | 1         |
| 2700050L05Rik_j4 | 1.05846   | 1.2153    | 0             | 1         | 1         |
| Mgmt_j2          | 0.107208  | 0.229388  | 1.09738       | 0.0653387 | 0.304562  |
| Mgmt_j3          | 2.03446   | 2.50831   | 0.302068      | 0.333608  | 0.67451   |
| XLOC_030066      | 0.94196   | 2.4907    | 0             | 1         | 1         |
| XLOC_030067      | 0.265173  | 0.201689  | -0.394804     | 0.743597  | 0.910278  |
| XLOC_030069      | 0.17392   | 0.0329162 | -2.40155      | 0.0751926 | 0.33096   |
| Ppp2r2d_j3       | 0.690973  | 0.507244  | 0             | 1         | 1         |
| Jakmip3_j9       | 0.669216  | 0.172767  | -1.95364      | 0.0063277 | 0.061076  |
| Inpp5a_j1        | 0.276093  | 0         | -1.79769e+308 | 0.0007999 | 0.0119898 |
| Paox_j5          | 0.635298  | 0.461127  | -0.46227      | 0.163455  | 0.498809  |
| Athl1_j2         | 0.127106  | 0         | -1.79769e+308 | 0.0007453 | 1         |
| Athl1_j1         | 0.143804  | 0.0411173 | -1.80629      | 0.139426  | 0.464399  |
| Athl1_j4         | 0.251753  | 0.21998   | -0.194638     | 0.797116  | 0.932581  |
| B4galnt4_j2      | 0.0330831 | 0.0593417 | 0.842951      | 0.386674  | 1         |
| Pkp3_j3          | 0.760617  | 1.07072   | 0.493337      | 0.373608  | 0.706436  |
| Lrrc56           | 0.392058  | 0.452684  | 0.207436      | 0.637456  | 0.8596    |
| Rassf7_j1        | 0.0634358 | 0.0458823 | -0.467359     | 0.766755  | 1         |
| Phrf1_j4         | 0.816297  | 0.836281  | 0             | 1         | 1         |
| Phrf1_j3         | 0.921265  | 0.571758  | 0             | 1         | 1         |
| Tmem80_j1        | 7.54936   | 7.59616   | 0.00891712    | 0.953265  | 0.986435  |
| Rplp2_j3         | 0.140263  | 0.402467  | 1.52074       | 0.0076702 | 0.0705343 |
| Pnpla2           | 14.6313   | 15.1771   | 0.0528351     | 0.624676  | 0.853434  |
| Efcab4a_j1       | 0.867312  | 1.24288   | 0             | 1         | 1         |
| Cd151_j9         | 0.600688  | 0.688952  | 0             | 1         | 1         |
| XLOC_030107      | 0.086389  | 0.0720512 | -0.261824     | 0.840004  | 1         |
| XLOC_030107      | 0.223398  | 0.171845  | -0.378507     | 0.481534  | 0.775154  |
| Muc2_j2          | 0.11199   | 0         | -1.79769e+308 | 0.0008692 | 1         |
| Muc2_j5          | 0.199945  | 0.132098  | -0.597999     | 0.598445  | 0.840825  |
| Brsk2_j8         | 2.39631   | 2.28906   | 0             | 1         | 1         |
| Mrpl23_j2        | 0.22333   | 0.164937  | -0.437265     | 0.626192  | 0.854124  |
| Kcnq1_j2         | 0.103877  | 0         | -1.79769e+308 | 9.61E-08  | 1         |
| Dhcr7_j2         | 6.38387   | 5.63564   | -0.179853     | 0.380993  | 0.711645  |
| Mrgprd_j1        | 14.09     | 11.1825   | 0             | 1         | 1         |
| Mboat7_j1        | 10.6818   | 11.0188   | 0             | 1         | 1         |
| Rdh13_j8         | 2.02996   | 3.07149   | 0             | 1         | 1         |

|                   |           |           |               |           |           |
|-------------------|-----------|-----------|---------------|-----------|-----------|
| Rdh13_j7          | 0.30321   | 0.186509  | 0             | 1         | 1         |
| Rdh13             | 1.43243   | 0.914257  | 0             | 1         | 1         |
| 6030429G01Rik_j11 | 0.312303  | 0.144124  | -1.11563      | 0.281946  | 0.630468  |
| 6030429G01Rik_j13 | 0.101947  | 0.0281982 | -1.85415      | 0.34154   | 1         |
| Ppp6r1_j5         | 0.406766  | 0.515794  | 0             | 1         | 1         |
| Cox6b2_j5         | 0.724171  | 0.88756   | 0.293514      | 0.733346  | 0.905882  |
| Il11_j2           | 0.286341  | 0.274402  | -0.0614461    | 0.93491   | 0.980088  |
| Shisa7_j5         | 0.0790016 | 0         | -1.79769e+308 | 0.0006794 | 1         |
| XLOC_030147       | 0.565425  | 0.289818  | -0.964186     | 0.0180457 | 0.13121   |
| Zfp579_j2         | 0.839092  | 0.745498  | -0.170625     | 0.629043  | 0.85574   |
| Zfp787_j3         | 3.61528   | 3.67235   | 0.0225968     | 0.906882  | 0.97045   |
| Zfp583_j3         | 0.212162  | 0.308628  | 0.540705      | 0.327832  | 0.670398  |
| Vmn2r29_j2        | 1.17067   | 1.06501   | 0             | 1         | 1         |
| Clcn4-2_j5        | 21.2872   | 18.3192   | 0             | 1         | 1         |
| Zfp329_j2         | 0.0537248 | 0         | -1.79769e+308 | 0.0002112 | 1         |
| Zfp329_j3         | 0.44982   | 0.184648  | -1.28457      | 0.0003373 | 0.0058829 |
| Zbtb45            | 1.1635    | 1.13564   | 0             | 1         | 1         |
| Ube2m_j3          | 0.685889  | 0.509354  | 0             | 1         | 1         |
| XLOC_030175       | 0.0664041 | 0.0456447 | -0.540823     | 0.803572  | 1         |
| 6330408A02Rik_j3  | 1.37542   | 1.5498    | 0             | 1         | 1         |
| Vmn1r90_j1        | 0.122172  | 0.0785726 | -0.63681      | 0.546492  | 1         |
| Sepw1_j1          | 0.106486  | 0.0535819 | -0.990848     | 0.655222  | 1         |
| Gltscr2_j1        | 9.56355   | 12.5639   | 0             | 1         | 1         |
| Ehd2_j3           | 1.08193   | 1.21289   | 0.164839      | 0.756248  | 0.91596   |
| Dhx34_j2          | 0.283916  | 0.158917  | 0             | 1         | 1         |
| Npas1_j1          | 1.44525   | 2.29596   | 0.667774      | 0.033725  | 0.200854  |
| Fkrp              | 2.60271   | 1.54654   | 0             | 1         | 1         |
| Fosb              | 0.0632096 | 0.0651455 | 0.0435223     | 0.975285  | 1         |
| Mark4_j4          | 4.78496   | 6.75716   | 0             | 1         | 1         |
| Lrrc68_j5         | 0.270745  | 1.80064   | 0             | 1         | 1         |
| Clasrp_j8         | 2.33066   | 2.19949   | -0.0835676    | 0.726783  | 0.90322   |
| Clasrp            | 0.527872  | 0.593326  | 0.168636      | 0.677324  | 0.878715  |
| Apoc1_j1          | 0.325581  | 0         | -1.79769e+308 | 0.021521  | 0.148188  |
| Apoe_j2           | 729.351   | 850.985   | 0             | 1         | 1         |
| XLOC_030225       | 0.103573  | 0.0686318 | 0             | 1         | 1         |
| Zfp109            | 0.64568   | 0.821182  | 0.346883      | 0.164745  | 0.500803  |
| Zfp61_j4          | 1.33117   | 0.839727  | -0.664699     | 0.0417255 | 0.230484  |
| Zfp94_j7          | 0.250282  | 0         | -1.79769e+308 | 0.012027  | 0.0983906 |
| Cd177_j2          | 0.0486391 | 0.0630063 | 0.373381      | 0.806742  | 1         |
| Atp1a3_j1         | 136.02    | 116.379   | 0             | 1         | 1         |
| Atp1a3            | 188.543   | 140.144   | 0             | 1         | 1         |
| Grik5             | 0.241244  | 0.27519   | 0.189933      | 0.643076  | 0.862213  |
| Dedd2_j5          | 0.310956  | 0.299785  | 0             | 1         | 1         |
| Gsk3a             | 40.9336   | 40.2475   | 0             | 1         | 1         |
| Erf               | 3.76097   | 4.71447   | 0.325993      | 0.02819   | 0.178167  |
| Lipe_j1           | 0.846793  | 0.763789  | 0             | 1         | 1         |
| Ceacam2_j1        | 0.178354  | 0.353476  | 0             | 1         | 1         |



|               |           |                 |           |           |           |
|---------------|-----------|-----------------|-----------|-----------|-----------|
| Hnrnpul1_j3   | 10.8145   | 11.0394         | 0         | 1         | 1         |
| Axl_j5        | 0.12259   | 0.0440117       | 0         | 1         | 1         |
| Axl           | 0.401005  | 0.226455        | 0         | 1         | 1         |
| Egln2_j3      | 3.26704   | 3.73349         | 0         | 1         | 1         |
| Rab4b_j1      | 0.168846  | 0.157585        | 0         | 1         | 1         |
| Snrpa         | 5.89286   | 6.79544         | 0.205598  | 0.255556  | 0.604249  |
| Spnb4_j5      | 9.56683   | 10.0237         | 0.0673075 | 0.68221   | 0.880712  |
| Spnb4_j4      | 0.286985  | 0.087846        | -1.70793  | 0.0032157 | 0.0364665 |
| Pld3          | 27.9543   | 21.8454         | 0         | 1         | 1         |
| 1700049G17Rik | 0.142452  | 0.100903        | -0.497501 | 0.625887  | 0.854009  |
| XLOC_030263   | 0.463299  | 0.149539        | 0         | 1         | 1         |
| Supt5h_j2     | 14.2536   | 14.2026         | 0         | 1         | 1         |
| Plekhg2_j3    | 0.153091  | 0               | 0         | 1         | 1         |
| Plekhg2_j4    | 0.326361  | 0.24914         | 0         | 1         | 1         |
| Pak4_j2       | 0.193815  | 0               | 0         | 1         | 1         |
| Mrps12_j1     | 8.0964    | 7.50091         | -0.110216 | 0.616576  | 0.848924  |
| Nfkbib        | 2.44693   | 2.02155         | 0         | 1         | 1         |
| Actn4_j2      | 0.247349  | 0 -1.79769e+308 |           | 2.83E-07  | 1.35E-05  |
| Ryr1_j6       | 0.221931  | 8.13E-06        | -14.7371  | 0.993529  | 0.998056  |
| Fam98c        | 0.919648  | 0.73006         | -0.333066 | 0.382219  | 0.712312  |
| XLOC_030290   | 0.18259   | 0.0799767       | -1.19096  | 0.073525  | 0.326799  |
| XLOC_030290   | 0.177992  | 0.121372        | -0.552378 | 0.311337  | 0.656077  |
| BC027344      | 0.970678  | 1.01181         | 0.0598803 | 0.803952  | 0.935008  |
| Zfp27_j4      | 0.562578  | 0.706543        | 0         | 1         | 1         |
| Zfp74_j1      | 2.38959   | 2.17874         | -0.13327  | 0.379533  | 0.710908  |
| Zfp14_j2      | 0.130931  | 0               | 0         | 1         | 1         |
| Zfp14         | 0.246013  | 0.215672        | 0         | 1         | 1         |
| Capns1_j1     | 167.908   | 188.716         | 0         | 1         | 1         |
| Capns1_j6     | 1.64248   | 1.58311         | 0         | 1         | 1         |
| Capns1_j7     | 68.9899   | 75.9873         | 0         | 1         | 1         |
| Tbcb_j1       | 54.8948   | 60.3185         | 0.13593   | 0.184467  | 0.524945  |
| Wdr62_j12     | 0.561933  | 0.122566        | -2.19684  | 0.0055742 | 0.0551522 |
| Wdr62_j8      | 0.283732  | 0.193438        | -0.552658 | 0.213991  | 0.559239  |
| Aplp1_j1      | 43.6716   | 48.7424         | 0.158481  | 0.165219  | 0.501638  |
| Arhgap33_j11  | 5.47442   | 7.92721         | 0         | 1         | 1         |
| Arhgap33_j12  | 1.15872   | 1.09766         | 0         | 1         | 1         |
| BC053749_j8   | 0.151359  | 0.0552936       | -1.45279  | 0.275693  | 0.624587  |
| Lin37_j2      | 4.78284   | 6.25921         | 0         | 1         | 1         |
| Lin37         | 2.26435   | 2.56748         | 0         | 1         | 1         |
| Zbtb32_j2     | 0.131418  | 0 -1.79769e+308 |           | 2.06E-05  | 1         |
| Rbm42_j5      | 0.0635081 | 0.0218396       | -1.53999  | 0.365775  | 1         |
| Usf2_j4       | 5.27065   | 4.75761         | 0         | 1         | 1         |
| Usf2_j7       | 9.80952   | 11.6702         | 0         | 1         | 1         |
| Lsr_j6        | 0.255322  | 0.0806061       | -1.66335  | 0.0724054 | 0.323811  |
| Fxyd5_j10     | 0.196345  | 0.555253        | 0         | 1         | 1         |
| Fxyd5_j9      | 0.622286  | 0.967081        | 0         | 1         | 1         |
| Fxyd7_j1      | 4.57316   | 6.7699          | 0         | 1         | 1         |

|                  |           |             |               |           |           |
|------------------|-----------|-------------|---------------|-----------|-----------|
| Fxyd7            | 91.519    | 80.361      | 0             | 1         | 1         |
| Hpn_j9           | 0.319901  | 0           | -1.79769e+308 | 0.0167437 | 0.124482  |
| Hpn_j2           | 0.212605  | 0.134801    | -0.657341     | 0.435366  | 0.74624   |
| Hpn_j10          | 0.0600483 | 0           | -1.79769e+308 | 0.0298964 | 1         |
| Hpn_j12          | 0.0940383 | 0.0926437   | -0.0215553    | 0.986649  | 1         |
| Gpi1_j8          | 67.4249   | 76.2563     | 0             | 1         | 1         |
| 4931406P16Rik_j1 | 1.1879    | 0.153296    | 0             | 1         | 1         |
| 4931406P16Rik_j2 | 0.196816  | 0.0488909   | 0             | 1         | 1         |
| Lsm14a_j1        | 5.23818   | 6.3688      | 0             | 1         | 1         |
| XLOC_030329      | 0.196901  | 0.0188145   | -3.38755      | 0.199593  | 0.542596  |
| Kctd15_j3        | 0.734142  | 1.70575     | 0             | 1         | 1         |
| Chst8_j3         | 0.258614  | 0           | -1.79769e+308 | 0.0004021 | 0.0068041 |
| Gpatc1_j1        | 2.28084   | 3.12493     | 0.454257      | 0.0204654 | 0.143202  |
| Zfp507_j3        | 0.141388  | 0.0359053   | 0             | 1         | 1         |
| Zfp507           | 0.760927  | 0.591917    | 0             | 1         | 1         |
| XLOC_030343      | 3.66221   | 2.27327     | -0.687946     | 0.0006301 | 0.0098731 |
| XLOC_030343      | 0.564285  | 0.411153    | -0.456751     | 0.145978  | 0.474036  |
| Zfp536_j1        | 0.619719  | 0.627696    | 0.0184509     | 0.928479  | 0.977977  |
| Zfp536           | 0.137977  | 0.19158     | 0.473517      | 0.185433  | 0.525792  |
| C80913_j1        | 0.542596  | 0.255339    | 0             | 1         | 1         |
| C80913_j2        | 0.796937  | 0.318838    | 0             | 1         | 1         |
| Pop4_j5          | 2.34073   | 0.482048    | 0             | 1         | 1         |
| AK081136_j2      | 0.0624038 | 0           | -1.79769e+308 | 0.0269312 | 1         |
| BC063263         | 0.341532  | 0.000139168 | 0             | 1         | 1         |
| C330019L16Rik    | 0.264665  | 0.0264078   | -3.32513      | 0.0048859 | 0.0498397 |
| 4931406B18Rik_j2 | 0.17789   | 0           | -1.79769e+308 | 0.0069739 | 0.0656682 |
| Cd33_j3          | 0.0567726 | 0.0303922   | -0.901493     | 0.577748  | 1         |
| Gm10109_j1       | 0.0574449 | 0           | -1.79769e+308 | 0.205411  | 1         |
| 1700028J19Rik_j1 | 0.237923  | 0.4046      | 0.766002      | 0.256878  | 0.60573   |
| 1700028J19Rik_j3 | 0.178512  | 0.175477    | -0.0247349    | 0.97855   | 0.993756  |
| Clec11a          | 0.099092  | 0.0359698   | -1.46198      | 0.242453  | 1         |
| 2310044H10Rik    | 11.1694   | 10.9567     | -0.027732     | 0.770745  | 0.922089  |
| Pold1_j3         | 0.335571  | 0.385322    | 0             | 1         | 1         |
| Nr1h2            | 8.40018   | 9.43503     | 0             | 1         | 1         |
| Myh14_j6         | 0.0873933 | 0.111704    | 0             | 1         | 1         |
| Ptov1_j2         | 35.4159   | 39.5731     | 0             | 1         | 1         |
| Ptov1_j6         | 13.3219   | 15.1142     | 0             | 1         | 1         |
| Ap2a1_j3         | 41.8558   | 45.2485     | 0             | 1         | 1         |
| Scaf1_j1         | 0.303356  | 1.71537     | 0             | 1         | 1         |
| Prr12_j4         | 0.0501163 | 0.0223914   | 0             | 1         | 1         |
| Rps11_j1         | 0.547731  | 0           | -1.79769e+308 | 0.0060242 | 0.0587344 |
| Rpl13a_j2        | 0.0374458 | 0.0618051   | 0.722922      | 0.68251   | 1         |
| Flt3l_j13        | 0.645066  | 0.736673    | 0.191576      | 0.602308  | 0.842829  |
| Flt3l_j12        | 0.573733  | 0.258873    | -1.14813      | 0.0194101 | 0.138078  |
| Ccdc155_j4       | 0.248122  | 0.224426    | -0.144815     | 0.901343  | 0.968662  |
| Ccdc155_j14      | 0.210736  | 0.0903038   | -1.22258      | 0.221113  | 0.568191  |
| Cd37             | 0.241928  | 0.170886    | -0.501543     | 0.480086  | 0.77397   |

|                  |           |                 |            |           |           |
|------------------|-----------|-----------------|------------|-----------|-----------|
| Trpm4_j3         | 2.18632   | 1.43543         | 0          | 1         | 1         |
| Ftl1_j1          | 0.0753902 | 0.11364         | 0.592022   | 0.454737  | 1         |
| Bax_j2           | 2.99568   | 4.73631         | 0          | 1         | 1         |
| Nucb1_j3         | 0.625897  | 0.469562        | 0          | 1         | 1         |
| Sec1_j3          | 0.236812  | 0.187186        | -0.339266  | 0.6012    | 0.842004  |
| Grin2d_j3        | 0.292172  | 0.336423        | 0.203455   | 0.769783  | 0.921491  |
| Sergef_j1        | 0.0647527 | 0 -1.79769e+308 |            | 0.0041106 | 1         |
| Sergef_j4        | 0.210546  | 0.141945        | -0.5688    | 0.414748  | 0.73287   |
| Hps5_j3          | 0.304424  | 0.442189        | 0          | 1         | 1         |
| Tsg101_j1        | 2.79487   | 2.16953         | -0.365401  | 0.208142  | 0.552263  |
| Uevld_j5         | 0.299008  | 0.140378        | -1.09087   | 0.241126  | 0.588263  |
| Mrgpra9_j1       | 0.420422  | 0.457548        | 0          | 1         | 1         |
| Mrgpra3_j2       | 0.0141168 | 0.739056        | 0          | 1         | 1         |
| XLOC_030435      | 0.534632  | 0.154776        | -1.78837   | 4.29E-06  | 0.0001479 |
| XLOC_030449      | 0.206646  | 0.289256        | 0.485187   | 0.439968  | 0.749308  |
| Gabra5_j4        | 0.897254  | 0.652297        | 0          | 1         | 1         |
| Gabra5_j3        | 1.19139   | 1.92512         | 0          | 1         | 1         |
| Snrpn_j4         | 0.756257  | 0.885826        | 0          | 1         | 1         |
| Snrpn_j5         | 0.50655   | 0.336067        | 0          | 1         | 1         |
| XLOC_030460      | 0.0621979 | 0.1057          | 0.765032   | 0.408735  | 1         |
| XLOC_030460      | 0.209379  | 0.106316        | -0.977758  | 0.10821   | 0.408949  |
| XLOC_030460      | 0.101542  | 0 -1.79769e+308 |            | 0.0029962 | 1         |
| A230057D06Rik_j2 | 1.37005   | 1.06603         | -0.36198   | 0.171807  | 0.50891   |
| Chrna7_j1        | 8.33025   | 8.01826         | 0          | 1         | 1         |
| Tjp1_j1          | 2.20771   | 2.26812         | 0.0389481  | 0.860233  | 0.955778  |
| AK038598_j3      | 1.85E-05  | 0.0757011       | 11.9968    | 0.977465  | 1         |
| Mef2a_j3         | 18.0655   | 13.5347         | 0          | 1         | 1         |
| AK049871_j1      | 0.190206  | 0.193647        | 0.025872   | 0.962711  | 0.989599  |
| Nr2f2_j2         | 11.8316   | 11.4498         | -0.0473304 | 0.706654  | 0.893061  |
| Mctp2_j6         | 0.970562  | 1.26898         | 0          | 1         | 1         |
| Mctp2_j9         | 0.351638  | 0.501592        | 0          | 1         | 1         |
| Chd2_j3          | 0.0472124 | 0 -1.79769e+308 |            | 0.0003005 | 1         |
| St8sia2          | 0.157506  | 0.0816738       | -0.947461  | 0.209078  | 0.553253  |
| Sv2b_j6          | 0.217616  | 0               | 0          | 1         | 1         |
| Ntrk3_j4         | 0.64358   | 0.167501        | 0          | 1         | 1         |
| E430016F16Rik_j1 | 0.0651563 | 0 -1.79769e+308 |            | 0.0036943 | 1         |
| E430016F16Rik_j2 | 0.329595  | 0.0818857       | -2.00901   | 0.0018658 | 0.0236522 |
| E430016F16Rik_j3 | 0.0866205 | 0.0621858       | -0.478123  | 0.555805  | 1         |
| Mrpl46_j1        | 14.9709   | 15.9266         | 0.0892793  | 0.561553  | 0.821809  |
| Rlbp1_j1         | 3.02339   | 2.32696         | 0          | 1         | 1         |
| Polg_j3          | 2.6015    | 2.63496         | 0          | 1         | 1         |
| Polg_j4          | 0.842194  | 0.828903        | 0          | 1         | 1         |
| Kif7_j14         | 0.265938  | 0.23231         | -0.195035  | 0.773714  | 0.923197  |
| Kif7_j13         | 0.123179  | 0.05979         | -1.04278   | 0.349258  | 1         |
| Cib1_j2          | 2.56485   | 2.51245         | 0          | 1         | 1         |
| Unc45a_j4        | 6.03807   | 7.79605         | 0          | 1         | 1         |
| Man2a2_j2        | 0.7173    | 0.0369154       | 0          | 1         | 1         |

|                   |           |                 |             |           |           |
|-------------------|-----------|-----------------|-------------|-----------|-----------|
| Fes_j6            | 0.628471  | 0.839637        | 0.417921    | 0.355928  | 0.691824  |
| Iqgap1_j1         | 0.426478  | 0.43313         | 0           | 1         | 1         |
| XLOC_030530       | 0.195338  | 0.150635        | -0.374908   | 0.618275  | 0.850061  |
| XLOC_030530       | 0.0829299 | 0.0171635       | -2.27255    | 0.168625  | 1         |
| Cpeb1_j5          | 0.180728  | 0               | 0           | 1         | 1         |
| Cpeb1_j6          | 11.9669   | 8.43064         | 0           | 1         | 1         |
| Cpeb1_j7          | 6.64896   | 4.51844         | 0           | 1         | 1         |
| Btbd1_j3          | 0.130599  | 0.284008        | 1.12079     | 0.130317  | 0.449445  |
| Btbd1_j4          | 1.29726   | 1.07685         | -0.268651   | 0.373875  | 0.706721  |
| Bnc1              | 0.399652  | 0.216699        | -0.883053   | 0.0016175 | 0.0210185 |
| AK042300_j3       | 1.30013   | 1.10709         | 0           | 1         | 1         |
| Il16_j5           | 0.360776  | 0.876287        | 1.2803      | 1.22E-06  | 4.89E-05  |
| Fah_j3            | 6.2163    | 5.6949          | 0           | 1         | 1         |
| Zfand6_j3         | 18.3243   | 18.6898         | 0           | 1         | 1         |
| Zfand6            | 3.74685   | 2.38152         | 0           | 1         | 1         |
| Gm10159           | 117.686   | 134.028         | 0.187595    | 0.0500541 | 0.258503  |
| Prss23_j3         | 0.485374  | 0.236666        | 0           | 1         | 1         |
| Eed_j1            | 0.764149  | 0.667285        | -0.19555    | 0.574241  | 0.827973  |
| BC048663_j1       | 1.40763   | 1.24589         | -0.176095   | 0.565116  | 0.823689  |
| Tmem126a          | 0.45775   | 0.398199        | 0           | 1         | 1         |
| Pcf11_j2          | 0.549553  | 0.407858        | -0.430192   | 0.194306  | 0.536753  |
| 4632427E13Rik     | 0.0934091 | 0.0851692       | -0.133231   | 0.908652  | 1         |
| Myo7a_j3          | 0.780621  | 0.75131         | -0.0552156  | 0.838731  | 0.948621  |
| Myo7a_j4          | 0.932365  | 0.500944        | -0.896247   | 0.0012236 | 0.0168057 |
| Myo7a_j6          | 0.419492  | 0 -1.79769e+308 |             | 5.33E-20  | 1.50E-17  |
| Capn5_j3          | 0.073911  | 0               | 0           | 1         | 1         |
| Tsku_j2           | 0.178862  | 0.0899755       | -0.991242   | 0.266564  | 0.615602  |
| 2210018M11Rik_j13 | 0.412049  | 0.494948        | 0           | 1         | 1         |
| 2210018M11Rik_j12 | 0.826317  | 1.00897         | 0           | 1         | 1         |
| AK052909_j2       | 0.157405  | 0.128448        | -0.293298   | 0.818056  | 0.940965  |
| Rps3_j1           | 165.039   | 202.012         | 0.291632    | 0.0008842 | 0.0129704 |
| Spcs2_j1          | 23.57     | 22.1166         | -0.0918186  | 0.507074  | 0.789482  |
| Rnf169_j1         | 0.111825  | 0               | 0           | 1         | 1         |
| Pold3_j1          | 1.4868    | 1.62802         | 0           | 1         | 1         |
| Pold3_j2          | 0.318557  | 0.350385        | 0           | 1         | 1         |
| Plekhb1_j1        | 9.91243   | 8.59777         | 0           | 1         | 1         |
| Plekhb1_j2        | 8.59142   | 8.88999         | 0           | 1         | 1         |
| P2ry2_j3          | 0.186631  | 0.111801        | 0           | 1         | 1         |
| P2ry2_j2          | 0.456431  | 0.292773        | 0           | 1         | 1         |
| Atg16l2_j5        | 0.225059  | 0.074311        | -1.59866    | 0.0474312 | 0.250092  |
| Atg16l2_j10       | 0.391866  | 0.213043        | -0.879214   | 0.0429116 | 0.234711  |
| Atg16l2_j17       | 0.80863   | 0.804132        | -0.00804622 | 0.984172  | 0.995386  |
| Inpp1_j1          | 0.807653  | 0.811812        | 0           | 1         | 1         |
| Inpp1_j2          | 0.907102  | 1.53453         | 0           | 1         | 1         |
| Inpp1_j3          | 0.0736232 | 0               | 0           | 1         | 1         |
| Folr2_j2          | 0.0828055 | 0.0144247       | -2.52118    | 0.476948  | 1         |
| Tomt_j1           | 0.359108  | 0.144381        | 0           | 1         | 1         |

|             |           |                 |            |           |           |
|-------------|-----------|-----------------|------------|-----------|-----------|
| Lrrc51_j3   | 1.01105   | 0.695317        | -0.540106  | 0.0794862 | 0.342405  |
| Rnf121_j2   | 0.186651  | 0.270472        | 0          | 1         | 1         |
| Trim21      | 0.0924697 | 0 -1.79769e+308 |            | 0.0066498 | 1         |
| Trim68      | 0.18616   | 0.484383        | 1.3796     | 0.0136038 | 0.107311  |
| Olfir78_j2  | 0.104249  | 0 -1.79769e+308 |            | 0.0017744 | 1         |
| Trim12a_j5  | 0.224222  | 0.138746        | -0.692485  | 0.181759  | 0.521948  |
| Trim30a_j6  | 0.0259549 | 0.140375        | 2.43521    | 0.024349  | 1         |
| Trim30a     | 0.116474  | 0.0251993       | -2.20855   | 0.0824084 | 1         |
| Trim30a_j7  | 0.157061  | 0.0398556       | -1.97847   | 0.148456  | 0.477336  |
| Fam160a2    | 0.798295  | 0.542723        | -0.556706  | 0.0120911 | 0.0987576 |
| Fam160a2_j4 | 2.87507   | 3.9797          | 0.469064   | 0.0001047 | 0.0022442 |
| Apbb1_j5    | 73.8166   | 43.5758         | 0          | 1         | 1         |
| Arfip2_j1   | 4.5659    | 3.89536         | 0          | 1         | 1         |
| Cyb5r2_j3   | 0.0537237 | 0.0610472       | 0.184366   | 0.851488  | 1         |
| Cyb5r2_j8   | 0.190982  | 0.156638        | -0.286001  | 0.738422  | 0.9081    |
| Stk33_j2    | 0.201728  | 0.0720791       | 0          | 1         | 1         |
| Stk33_j1    | 0.215389  | 0.142511        | 0          | 1         | 1         |
| St5_j8      | 1.60952   | 0.884022        | 0          | 1         | 1         |
| Scube2_j3   | 0.0619596 | 0 -1.79769e+308 |            | 0.0570158 | 1         |
| Tmem41b_j4  | 0.158788  | 0.177634        | 0.161806   | 0.818752  | 0.941277  |
| Sbf2_j7     | 0.766717  | 0.766378        | 0          | 1         | 1         |
| Sbf2        | 0.754206  | 1.02234         | 0          | 1         | 1         |
| Sbf2_j3     | 0.643413  | 0.462753        | 0          | 1         | 1         |
| BC051516    | 0.471825  | 0.485248        | 0          | 1         | 1         |
| Rnf141_j5   | 3.43222   | 3.54762         | 0          | 1         | 1         |
| Mrvi1_j5    | 0.0887425 | 0 -1.79769e+308 |            | 0.0118237 | 1         |
| Eif4g2_j6   | 54.9787   | 42.37           | 0          | 1         | 1         |
| Galnt14_j1  | 3.33889   | 2.29562         | 0          | 1         | 1         |
| XLOC_030665 | 0.147975  | 0.0192353       | -2.94353   | 0.0725685 | 0.32416   |
| Calca_j5    | 221.207   | 184.195         | 0          | 1         | 1         |
| Calca_j7    | 0.425683  | 0.186054        | 0          | 1         | 1         |
| Calca_j4    | 42.315    | 40.5344         | 0          | 1         | 1         |
| Sox6_j2     | 0.104984  | 0.0527484       | -0.992965  | 0.125709  | 1         |
| Plekha7     | 0.168982  | 2.77E-05        | -12.5724   | 0.933197  | 0.9797    |
| Plekha7_j8  | 0.340357  | 0.461036        | 0.437828   | 0.187196  | 0.52819   |
| Pik3c2a_j1  | 0.449039  | 0.420202        | -0.0957592 | 0.786735  | 0.928702  |
| Tmc7_j2     | 0.356001  | 0.383091        | 0          | 1         | 1         |
| Gpr139_j3   | 0.232269  | 0.146581        | 0          | 1         | 1         |
| XLOC_030686 | 0.32336   | 0.104293        | -1.63251   | 0.0261581 | 0.169728  |
| Eri2_j1     | 0.383829  | 0.226           | -0.76414   | 0.125954  | 0.441872  |
| Eri2_j3     | 0.120953  | 0.176702        | 0.54687    | 0.403292  | 0.726254  |
| AK034016    | 0.5966    | 0.355039        | -0.748786  | 0.120959  | 0.433073  |
| Usp31_j3    | 8.70455   | 8.69609         | 0          | 1         | 1         |
| Palb2_j2    | 0.237674  | 0.000350667     | -9.40466   | 0.924248  | 0.976334  |
| Arhgap17_j1 | 3.25669   | 4.93901         | 0          | 1         | 1         |
| Arhgap17_j4 | 13.9665   | 12.9038         | 0          | 1         | 1         |
| Nsmce1_j5   | 0.0547764 | 0 -1.79769e+308 |            | 0.186767  | 1         |

|                  |           |                 |            |           |           |
|------------------|-----------|-----------------|------------|-----------|-----------|
| Gtf3c1_j3        | 0.376272  | 1.42748         | 0          | 1         | 1         |
| Gsg1l_j2         | 0.398615  | 0.301098        | -0.404763  | 0.370051  | 0.703555  |
| Xpo6_j5          | 8.34838   | 10.5714         | 0          | 1         | 1         |
| Xpo6_j6          | 4.16194   | 2.55894         | 0          | 1         | 1         |
| Xpo6_j7          | 8.16753   | 6.59238         | 0          | 1         | 1         |
| Lat_j1           | 2.13E-05  | 0.236679        | 13.4419    | 0.991721  | 0.997561  |
| Nfatc2ip_j1      | 0.370363  | 0.474347        | 0.357003   | 0.370248  | 0.703609  |
| Sh2b1_j1         | 2.10762   | 2.10284         | 0          | 1         | 1         |
| Sh2b1            | 0.19981   | 0.373895        | 0          | 1         | 1         |
| Atxn2l_j7        | 0.607816  | 0.640786        | 0          | 1         | 1         |
| Atxn2l_j2        | 13.4835   | 14.1151         | 0          | 1         | 1         |
| Cln3_j3          | 1.06926   | 0.000318576     | -11.7127   | 0.771136  | 0.922274  |
| Cln3_j2          | 1.61792   | 1.61419         | -0.0033256 | 0.990998  | 0.997281  |
| Aldoa_j2         | 4.70275   | 4.59716         | 0          | 1         | 1         |
| Aldoa_j3         | 868.257   | 904.981         | 0          | 1         | 1         |
| Ino80e_j1        | 0.176172  | 0.0826607       | -1.09171   | 0.0966838 | 0.384063  |
| Mvp_j13          | 0.0395883 | 0.0911523       | 0          | 1         | 1         |
| Maz_j2           | 5.19266   | 4.97478         | 0          | 1         | 1         |
| Qprt_j2          | 0.606326  | 0.139273        | -2.12218   | 0.0109066 | 0.0912549 |
| 9130019O22Rik    | 0.58234   | 0.426105        | -0.450654  | 0.167219  | 0.50361   |
| Zfp764           | 0.969353  | 0.801384        | -0.274528  | 0.376492  | 0.708503  |
| Zfp629_j4        | 1.37148   | 1.71971         | 0.326426   | 0.210843  | 0.555568  |
| Zfp629_j5        | 0.234162  | 0 -1.79769e+308 |            | 8.16E-10  | 6.96E-08  |
| Bcl7c_j1         | 0.833864  | 0.322358        | 0          | 1         | 1         |
| Bcl7c            | 3.29691   | 3.28234         | 0          | 1         | 1         |
| Zfp668_j3        | 0.434359  | 0.416915        | -0.0591345 | 0.840511  | 0.949579  |
| Prss53_j4        | 0.101985  | 0.211761        | 1.05407    | 0.0005017 | 0.0081702 |
| Prss36_j9        | 0.675295  | 0.46115         | -0.55028   | 0.289022  | 0.63673   |
| Rgs10_j1         | 6.49636   | 7.4201          | 0.191806   | 0.38677   | 0.714764  |
| Tial1_j1         | 3.32132   | 3.04723         | 0          | 1         | 1         |
| Fgfr2_j2         | 0.178745  | 0 -1.79769e+308 |            | 0.0002079 | 0.0039645 |
| Fgfr2_j3         | 0.0505404 | 0 -1.79769e+308 |            | 0.0342377 | 1         |
| Fgfr2_j8         | 0.128609  | 0.0699396       | -0.878809  | 0.424292  | 1         |
| Ate1             | 1.75664   | 1.62532         | 0          | 1         | 1         |
| Ikzf5_j2         | 0.0374631 | 0.050575        | 0          | 1         | 1         |
| Ikzf5_j1         | 0.118821  | 0.11737         | 0          | 1         | 1         |
| Cpxm2_j4         | 0.26522   | 0.00138515      | -7.58101   | 0.28209   | 0.630606  |
| Chst15_j4        | 0.27309   | 0.0220094       | 0          | 1         | 1         |
| Dhx32            | 6.02192   | 7.16327         | 0          | 1         | 1         |
| D7Ert443e_j1     | 0.349146  | 0 -1.79769e+308 |            | 1.13E-07  | 5.99E-06  |
| Fam196a_j5       | 0.100003  | 0               | 0          | 1         | 1         |
| Mki67_j1         | 0.115052  | 0.0584389       | -0.977282  | 0.297504  | 1         |
| Ebf3_j1          | 0.26746   | 0               | 0          | 1         | 1         |
| Ebf3_j2          | 0.217343  | 0               | 0          | 1         | 1         |
| 9430038I01Rik_j6 | 0.261794  | 0.24118         | -0.118325  | 0.860296  | 0.955778  |
| Tcerg1l_j1       | 0.7295    | 0.625835        | -0.221125  | 0.632405  | 0.857156  |
| XLOC_030797      | 0.0877793 | 0.0745015       | -0.236611  | 0.776322  | 1         |

|                  |           |                       |            |           |           |
|------------------|-----------|-----------------------|------------|-----------|-----------|
| XLOC_030797      | 0.221715  | 0.151078              | -0.553417  | 0.51719   | 0.795502  |
| Bnip3_j1         | 0.251831  | 0.213833              | 0          | 1         | 1         |
| Bnip3_j6         | 0.629866  | 0.25466               | 0          | 1         | 1         |
| Stk32c           | 4.68955   | 3.98195               | 0          | 1         | 1         |
| Adam8_j4         | 0.0548226 | 0 -1.79769e+308       |            | 0.0058387 | 1         |
| Adam8_j9         | 0.543417  | 1.80356               | 1.73071    | 1.05E-08  | 7.36E-07  |
| 1810014F10Rik_j1 | 1.4005    | 0 -1.79769e+308       |            | 9.56E-06  | 0.0002982 |
| 1810014F10Rik_j2 | 4.1462    | 5.01138               | 0.273416   | 0.334067  | 0.674869  |
| Sirt3_j3         | 0.983065  | 1.05359               | 0          | 1         | 1         |
| Ifitm6           | 0.276065  | 0.240884              | -0.196671  | 0.79133   | 0.930476  |
| Sigirr_j5        | 0.250162  | 0.192228              | -0.380046  | 0.681872  | 0.880565  |
| Hras1_j2         | 0         | 0.266811 1.79769e+308 |            | 0.0005174 | 0.0083737 |
| Hras1_j1         | 1.65799   | 1.58519               | -0.0647734 | 0.779488  | 0.925607  |
| B230206H07Rik_j1 | 0.228717  | 0.148439              | -0.623695  | 0.182364  | 0.522846  |
| Slc25a22_j10     | 0.503052  | 0.592277              | 0          | 1         | 1         |
| Slc25a22_j11     | 0.343401  | 0                     | 0          | 1         | 1         |
| 6330512M04Rik    | 3.51992   | 3.91393               | 0.153077   | 0.472004  | 0.769302  |
| 6330512M04Rik_j1 | 0.137585  | 0 -1.79769e+308       |            | 0.0752717 | 0.331168  |
| 6330512M04Rik_j4 | 0.3028    | 0 -1.79769e+308       |            | 0.0251242 | 0.164863  |
| AK039657_j1      | 0.0753837 | 0.100216              | 0.410791   | 0.695764  | 1         |
| Nap1l4           | 24.9421   | 31.7677               | 0          | 1         | 1         |
| Tnfrsf22_j1      | 0.117783  | 0.132479              | 0.169635   | 0.832215  | 1         |
| Tnfrsf23_j2      | 0.188478  | 0.0409714             | -2.20171   | 0.046072  | 0.245899  |
| Osbpl5_j1        | 2.4637    | 4.14595               | 0          | 1         | 1         |
| Nadsyn1_j10      | 0.200062  | 0.188384              | -0.0867743 | 0.896582  | 0.967033  |
| Nadsyn1_j1       | 0.1517    | 0.0551113             | -1.4608    | 0.231426  | 0.578474  |
| Nadsyn1          | 0.125076  | 0.553128              | 2.14481    | 0.0002166 | 0.0040948 |
| Ctnn_j9          | 3.07397   | 3.96959               | 0          | 1         | 1         |
| Ppfia1_j6        | 0.0572649 | 0                     | 0          | 1         | 1         |
| Ppfia1_j7        | 0.181222  | 0.140019              | 0          | 1         | 1         |
| Ano1_j2          | 0.800338  | 0.362517              | 0          | 1         | 1         |
| Myadm_j1         | 30.6418   | 54.6622               | 0          | 1         | 1         |
| Cacng7_j2        | 0         | 0.192205 1.79769e+308 |            | 0.0122465 | 0.0996757 |
| Cacng8_j1        | 0.320818  | 0.600071              | 0.903375   | 0.164621  | 0.500613  |
| Cacng8_j3        | 0.240307  | 0.557738              | 1.21471    | 0.383674  | 0.713176  |
| Ndufa3_j2        | 18.3194   | 18.9292               | 0.0472408  | 0.831292  | 0.945549  |
| Tsen34_j1        | 17.4702   | 20.3026               | 0.21677    | 0.0683015 | 0.312925  |
| Eps8l1_j6        | 0.0157643 | 0.0495135             | 0          | 1         | 1         |
| Brsk1_j2         | 0.383263  | 0.399853              | 0          | 1         | 1         |
| Brsk1_j3         | 6.75417   | 8.65293               | 0          | 1         | 1         |
| Rpl28_j4         | 0.55489   | 0.845819              | 0.608148   | 0.0821548 | 0.349173  |
| Isoc2a           | 13.6986   | 13.9287               | 0.0240323  | 0.869869  | 0.958673  |
| Zfp628_j3        | 0.959484  | 0.854105              | 0          | 1         | 1         |
| Zfp865_j4        | 0.0232102 | 0.118551              | 0          | 1         | 1         |
| U2af2_j1         | 0.570247  | 0.57835               | 0          | 1         | 1         |
| Zfp444_j1        | 0         | 0.16157 1.79769e+308  |            | 0.0006189 | 0.0097383 |
| Zfp28_j10        | 0         | 0.12717 1.79769e+308  |            | 0.0178714 | 1         |

|                  |           |           |              |           |           |
|------------------|-----------|-----------|--------------|-----------|-----------|
| Zfp606           | 0.304728  | 0.211378  | -0.527692    | 0.241676  | 0.588802  |
| Zfp324_j3        | 1.15907   | 0.831381  | 0            | 1         | 1         |
| Zfp446_j3        | 0         | 0.236899  | 1.79769e+308 | 3.84E-05  | 0.000952  |
| Zfp446_j2        | 0.0864162 | 0.0895883 | 0.0520099    | 0.944289  | 1         |
| Zfp446_j6        | 0.0703849 | 0.347059  | 2.30185      | 0.0003966 | 0.0067278 |
| XLOC_029493      | 2.31671   | 2.38234   | 0.0402985    | 0.903815  | 0.969234  |
| Zc3h4_j2         | 0.0359834 | 0.0846366 | 0            | 1         | 1         |
| Zc3h4_j5         | 1.77515   | 2.81414   | 0            | 1         | 1         |
| XLOC_029499      | 0.0617904 | 0.0542587 | -0.187528    | 0.876872  | 1         |
| Strn4_j3         | 0         | 0.0587113 | 0            | 1         | 1         |
| Gng8_j4          | 3.53497   | 3.3606    | 0            | 1         | 1         |
| Gng8_j7          | 8.93949   | 6.1738    | 0            | 1         | 1         |
| Mill2_j5         | 0.0648839 | 0.0581535 | 0            | 1         | 1         |
| Pglyrp1          | 0.240605  | 0.330734  | 0.459006     | 0.307746  | 0.652771  |
| Mypop_j2         | 3.01393   | 3.63667   | 0            | 1         | 1         |
| Sympk_j2         | 2.78996   | 6.53977   | 0            | 1         | 1         |
| Dmwd_j2          | 0.989692  | 2.68106   | 0            | 1         | 1         |
| Dmpk_j5          | 0         | 0.295464  | 0            | 1         | 1         |
| Dmpk_j6          | 0.211662  | 0.207859  | 0            | 1         | 1         |
| Six5_j2          | 0.589902  | 0.705469  | 0.258107     | 0.458573  | 0.761199  |
| Eml2_j3          | 4.3986    | 2.73231   | -0.686925    | 0.0007949 | 0.0119257 |
| Eml2_j5          | 12.2118   | 11.4102   | -0.0979456   | 0.444312  | 0.752066  |
| Ppp1r13l_j1      | 0         | 0.101129  | 1.79769e+308 | 0.0134201 | 1         |
| Ckm_j3           | 0         | 0.0872903 | 1.79769e+308 | 0.1131    | 1         |
| Zfp296_j1        | 0.339595  | 0.347788  | 0.0343928    | 0.960815  | 0.988902  |
| Zfp296_j2        | 0.694871  | 0.790625  | 0.186249     | 0.54056   | 0.808873  |
| AK043814_j1      | 0.023302  | 0.0692134 | 0            | 1         | 1         |
| 1500002O20Rik_j6 | 0.777759  | 1.23982   | 0.672737     | 0.102495  | 0.39664   |
| Zfp428           | 0.221828  | 0.173631  | 0            | 1         | 1         |
| Zfp428_j1        | 9.15231   | 9.45873   | 0            | 1         | 1         |
| Rps19_j2         | 0.532755  | 0.332965  | 0            | 1         | 1         |
| Cd79a_j1         | 0.137044  | 0.160531  | 0.228214     | 0.850465  | 0.952478  |
| Arhgef1_j8       | 1.63631   | 1.9583    | 0            | 1         | 1         |
| Cic_j5           | 3.07857   | 1.51663   | 0            | 1         | 1         |
| Megf8_j6         | 0         | 0.0503618 | 1.79769e+308 | 0.0091099 | 1         |
| Atp5sl           | 1.2198    | 1.17802   | -0.050283    | 0.898311  | 0.967622  |
| B3gnt8           | 0.0032919 | 0.217207  | 6.044        | 0.105977  | 0.404176  |
| B3gnt8_j3        | 0.363546  | 0.120837  | -1.58907     | 0.0314761 | 0.191742  |
| Adck4_j1         | 6.20484   | 7.41526   | 0.257104     | 0.0308752 | 0.189391  |
| Sertad3_j1       | 2.18212   | 2.12585   | 0            | 1         | 1         |
| 2310022A10Rik_j1 | 0.20277   | 0.639337  | 1.65673      | 0.0181591 | 0.131804  |
| Akt2_j2          | 0         | 0.160212  | 1.79769e+308 | 0.0414877 | 0.229503  |
| Akt2_j9          | 1.10129   | 1.16932   | 0.0864708    | 0.738506  | 0.908119  |
| Akt2_j13         | 1.53574   | 1.96794   | 0.357746     | 0.0994994 | 0.390483  |
| Akt2_j18         | 4.15232   | 4.49946   | 0.115833     | 0.452217  | 0.757358  |
| Zfp60            | 0.614906  | 0.492726  | -0.319582    | 0.275679  | 0.624585  |
| 9530053A07Rik_j1 | 0.0469673 | 0.0633956 | 0.432727     | 0.756285  | 1         |



|                  |             |             |              |           |           |
|------------------|-------------|-------------|--------------|-----------|-----------|
| Dyrk1b_j2        | 3.70681     | 3.20709     | 0            | 1         | 1         |
| Dyrk1b_j5        | 0.237538    | 0.840855    | 0            | 1         | 1         |
| Lrfn1_j2         | 0.771249    | 0.785837    | 0            | 1         | 1         |
| Fbxo27_j6        | 2.4514      | 1.57054     | -0.642348    | 0.041555  | 0.229767  |
| Fbxo17_j1        | 0           | 0.0832511   | 1.79769e+308 | 0.0751001 | 1         |
| Fbxo17_j2        | 0.237603    | 0.265791    | 0.161741     | 0.818039  | 0.940965  |
| Fbxo17_j8        | 0.0829609   | 0.13149     | 0.664448     | 0.669073  | 1         |
| Map4k1_j1        | 0           | 0.102105    | 1.79769e+308 | 0.008529  | 1         |
| Dpf1_j2          | 0.0656146   | 0.154268    | 1.23335      | 0.182621  | 1         |
| Dpf1_j6          | 0.109183    | 0.158015    | 0.53331      | 0.546932  | 0.813288  |
| Zfp790_j4        | 0.000201124 | 0.356741    | 0            | 1         | 1         |
| AK155472_j1      | 0.61448     | 0.405396    | -0.600035    | 0.149181  | 0.478285  |
| AK138949_j3      | 36.6119     | 41.3665     | 0.176148     | 0.135922  | 0.458707  |
| Zfp568           | 0           | 0.0638775   | 1.79769e+308 | 0.0054719 | 1         |
| Zfp382_j3        | 0.203547    | 0.000203837 | 0            | 1         | 1         |
| Alkbh6_j4        | 1.95358     | 1.5492      | -0.334598    | 0.357469  | 0.693341  |
| Alkbh6_j3        | 11.4761     | 8.83739     | -0.376934    | 0.0626832 | 0.296466  |
| AI428936_j9      | 0.357133    | 0.382344    | 0.098411     | 0.839877  | 0.949215  |
| Nfkbid_j1        | 0.193471    | 0.205461    | 0.0867478    | 0.910116  | 0.971581  |
| Nfkbid_j2        | 0.0351818   | 0.0825015   | 1.22959      | 0.489655  | 1         |
| Tmem149_j4       | 0.395419    | 0.788653    | 0.996007     | 0.0074643 | 0.0691204 |
| AK154275_j1      | 0.0997522   | 0.160032    | 0.681942     | 0.17178   | 0.50891   |
| AK087850         | 0.179206    | 0.222754    | 0            | 1         | 1         |
| XLOC_029650      | 0.130293    | 0.111294    | -0.227388    | 0.814139  | 1         |
| XLOC_029652      | 0.111972    | 0.109411    | -0.0333898   | 0.971119  | 1         |
| XLOC_029652      | 0           | 0.0558643   | 1.79769e+308 | 0.0987625 | 1         |
| Ccdc123_j1       | 0.192231    | 0.384967    | 1.00189      | 0.0614886 | 0.292977  |
| XLOC_029665      | 0           | 0.0969542   | 1.79769e+308 | 7.66E-06  | 1         |
| Zfp788_j8        | 0.688383    | 0.989174    | 0            | 1         | 1         |
| Zfp788           | 0.811353    | 0.579963    | 0            | 1         | 1         |
| Nkg7             | 0.127285    | 0.222352    | 0.804784     | 0.338641  | 0.678955  |
| Etfb_j2          | 0.105585    | 0.172499    | 0.708184     | 0.311327  | 0.656077  |
| Klk8             | 0.34552     | 0.390185    | 0.175386     | 0.744595  | 0.910838  |
| Klk5_j1          | 0           | 0.43742     | 1.79769e+308 | 0.0008444 | 0.0125117 |
| 2410002F23Rik_j2 | 0.784268    | 0.313527    | 0            | 1         | 1         |
| Shank1_j6        | 0.229278    | 0.128597    | -0.834241    | 0.0879519 | 0.363161  |
| Shank1_j5        | 0.182751    | 0.177339    | -0.0433682   | 0.918975  | 0.974676  |
| Syt3_j1          | 0.454817    | 0.443675    | 0            | 1         | 1         |
| Aspdh_j11        | 0.0892883   | 0.0840127   | -0.0878629   | 0.945867  | 1         |
| Kcnc3_j3         | 3.72805     | 1.21222     | -1.62076     | 6.53E-13  | 9.58E-11  |
| Kcnc3_j8         | 1.42836     | 0.50026     | -1.51361     | 2.09E-05  | 0.0005756 |
| Nup62_j1         | 0.00160049  | 2.9643      | 0            | 1         | 1         |
| AK087248_j1      | 0.422296    | 0.430806    | 0.0287848    | 0.906353  | 0.970354  |
| Nosip_j3         | 5.71802     | 7.73173     | 0            | 1         | 1         |
| Pih1d1_j4        | 0.816743    | 3.01641     | 0            | 1         | 1         |
| Tead2_j1         | 0.257544    | 0.54177     | 1.07286      | 0.0123766 | 0.100433  |
| XLOC_029715      | 0.0906753   | 0.181525    | 1.00139      | 0.348996  | 0.687     |

|                  |           |           |              |           |           |
|------------------|-----------|-----------|--------------|-----------|-----------|
| Hrc_j1           | 0         | 0.0973821 | 1.79769e+308 | 0.0512357 | 1         |
| Plekha4_j5       | 2.93157   | 3.96368   | 0            | 1         | 1         |
| Ntn5             | 0.5307    | 0.498461  | -0.0904148   | 0.849785  | 0.952228  |
| Lmtk3_j9         | 0.885451  | 1.2552    | 0            | 1         | 1         |
| Lmtk3_j10        | 2.1712    | 2.64179   | 0            | 1         | 1         |
| AK133391_j2      | 0.511849  | 0.332984  | -0.620267    | 0.273713  | 0.62288   |
| Ccdc114_j5       | 0         | 0.111228  | 1.79769e+308 | 0.0206372 | 1         |
| Tmem86a_j3       | 10.6464   | 10.3087   | -0.0465001   | 0.724973  | 0.902263  |
| XLOC_029742      | 0.0535309 | 0.0810081 | 0.597695     | 0.592603  | 1         |
| Zdhhc13_j1       | 0.0264016 | 0.0900327 | 1.76982      | 0.305076  | 1         |
| Nav2_j1          | 0.143565  | 0.337246  | 1.23209      | 5.08E-05  | 0.0012086 |
| Nav2_j12         | 0.197458  | 0.494446  | 1.32427      | 0.0006921 | 0.0106248 |
| Oca2_j1          | 0.0554148 | 0.205174  | 1.8885       | 0.076078  | 0.333082  |
| Ube3a_j6         | 3.10081   | 3.61153   | 0.219964     | 0.256733  | 0.605651  |
| Otud7a_j4        | 1.77297   | 1.55347   | -0.190679    | 0.498551  | 0.784066  |
| XLOC_029771      | 0.0160406 | 0.105551  | 2.71814      | 0.174557  | 1         |
| Mttr10_j1        | 0.050441  | 0.158913  | 0            | 1         | 1         |
| Mcee_j1          | 0.219067  | 0.32894   | 0.586453     | 0.567623  | 0.824883  |
| Apba2_j7         | 0.637826  | 3.12516   | 0            | 1         | 1         |
| Apba2_j9         | 0         | 1.25641   | 0            | 1         | 1         |
| Tarsl2_j2        | 3.66409   | 2.89544   | 0            | 1         | 1         |
| Chsy1_j1         | 1.23679   | 0.9618    | 0            | 1         | 1         |
| Fam169b_j5       | 0         | 0.0527533 | 1.79769e+308 | 0.0888211 | 1         |
| Fam169b_j9       | 0         | 0.0832253 | 1.79769e+308 | 0.0545225 | 1         |
| BC070425_j5      | 0.0929731 | 0.0196862 | -2.23963     | 0.25805   | 1         |
| Akap13_j5        | 0.438493  | 0.572253  | 0.384099     | 0.131738  | 0.451722  |
| Akap13_j8        | 0.730255  | 0.983191  | 0.42907      | 0.0501916 | 0.258895  |
| Klhl25_j1        | 0.313256  | 1.23239   | 0            | 1         | 1         |
| MRPS11           | 8.17291   | 8.26846   | 0.0167698    | 0.919455  | 0.974745  |
| Abhd2_j2         | 4.63986   | 8.08194   | 0            | 1         | 1         |
| Abhd2_j3         | 12.1359   | 6.93983   | 0            | 1         | 1         |
| Mesp2            | 0.122491  | 0.149724  | 0.289625     | 0.718585  | 1         |
| Zfp710_j1        | 0.0781201 | 0.071525  | -0.127247    | 0.911231  | 1         |
| Vps33b_j1        | 0.190334  | 0.325719  | 0.775098     | 0.301515  | 0.647902  |
| XLOC_029824      | 0.0717817 | 0.112412  | 0            | 1         | 1         |
| Zfp592_j2        | 0.671409  | 1.40993   | 0            | 1         | 1         |
| AK013794_j4      | 0.427361  | 0.609432  | 0.51201      | 0.342147  | 0.681895  |
| Whamm_j5         | 0.192522  | 0.277029  | 0.52501      | 0.42686   | 0.74141   |
| XLOC_029832      | 0.116108  | 0.17182   | 0.565428     | 0.372388  | 0.705388  |
| Tmc3_j1          | 0.0748328 | 0.104246  | 0.478252     | 0.609579  | 1         |
| XLOC_029842      | 0.163333  | 0.112615  | 0            | 1         | 1         |
| AK132723_j3      | 0.146574  | 0.124999  | 0            | 1         | 1         |
| AK132723_j1      | 0.154933  | 0.185853  | 0            | 1         | 1         |
| Me3_j1           | 1.00021   | 0.854181  | -0.227686    | 0.46726   | 0.766637  |
| E230029C05Rik_j2 | 0.172066  | 0.128239  | -0.42412     | 0.695391  | 0.887572  |
| Sytl2_j4         | 2.30564   | 1.29592   | 0            | 1         | 1         |
| Sytl2            | 0.979487  | 0.44659   | 0            | 1         | 1         |

|                  |           |           |              |           |           |
|------------------|-----------|-----------|--------------|-----------|-----------|
| BC051589_j1      | 4.16642   | 4.22157   | 0            | 1         | 1         |
| Dlg2_j1          | 1.21387   | 1.11867   | 0            | 1         | 1         |
| Dlg2_j2          | 0.749278  | 0.487322  | 0            | 1         | 1         |
| Dlg2_j4          | 0         | 0.0543662 | 0            | 1         | 1         |
| Odz4_j10         | 0         | 0.0759182 | 1.79769e+308 | 0.0002674 | 1         |
| Kctd21_j3        | 0         | 0.0635348 | 0            | 1         | 1         |
| XLOC_029881      | 0.0265868 | 0.0777378 | 1.54791      | 0.244049  | 1         |
| XLOC_029881      | 0.113105  | 0.0895077 | -0.337581    | 0.762283  | 1         |
| XLOC_029881      | 0.105373  | 0.0555657 | -0.923238    | 0.411172  | 1         |
| Gdpd5_j1         | 3.42297   | 4.67821   | 0.450709     | 0.0216578 | 0.148897  |
| XLOC_029885      | 0.0815916 | 0.190558  | 1.22374      | 0.100747  | 0.39309   |
| Arrb1_j6         | 0.0997752 | 0.201534  | 0            | 1         | 1         |
| Arrb1_j8         | 22.3385   | 40.3112   | 0            | 1         | 1         |
| Pgm2l1_j1        | 0.346722  | 0.240936  | 0            | 1         | 1         |
| Arap1_j1         | 2.2062    | 2.68106   | 0.281242     | 0.0546803 | 0.272724  |
| Clpb_j1          | 0.22628   | 0.12668   | 0            | 1         | 1         |
| Numa1_j4         | 0.25224   | 0.322071  | 0            | 1         | 1         |
| Trim6_j4         | 0         | 0.0525222 | 1.79769e+308 | 0.0665815 | 1         |
| Trim34a_j1       | 0.126673  | 0.210153  | 0.730328     | 0.563214  | 0.82249   |
| Trim34a_j2       | 1.43128   | 1.55282   | 0.117586     | 0.634581  | 0.858242  |
| XLOC_029922      | 0.0971129 | 0.166932  | 0.781524     | 0.193377  | 0.535696  |
| XLOC_029922      | 0.0837109 | 0.0565277 | -0.566458    | 0.626633  | 1         |
| Dnhd1_j4         | 0.0794472 | 0.175055  | 1.13974      | 0.0511225 | 0.26195   |
| XLOC_029922      | 0.173629  | 0.208622  | 0.264883     | 0.693807  | 0.887013  |
| Dnhd1_j9         | 0.145659  | 0.0249202 | -2.54721     | 0.0343087 | 0.202972  |
| Dnhd1_j11        | 0.0421906 | 0.126001  | 1.57844      | 0.130819  | 1         |
| Ppfibp2_j3       | 0         | 0.126999  | 1.79769e+308 | 0.0062925 | 1         |
| Ppfibp2_j8       | 0.156811  | 0.0696631 | -1.17056     | 0.208706  | 0.552749  |
| Ppfibp2_j9       | 0.124297  | 0.176668  | 0.507243     | 0.462959  | 0.76341   |
| XLOC_029934      | 0.282332  | 0.280425  | -0.00977922  | 0.977156  | 0.993353  |
| Ipo7_j2          | 5.79091   | 7.3764    | 0            | 1         | 1         |
| Zfp143_j2        | 0.610559  | 0.904528  | 0            | 1         | 1         |
| Wee1_j2          | 1.39945   | 0.96025   | -0.543378    | 0.0658986 | 0.306293  |
| Ampd3            | 1.06954   | 1.40801   | 0            | 1         | 1         |
| Tead1            | 0         | 0.205643  | 1.79769e+308 | 9.04E-07  | 3.79E-05  |
| Arntl_j7         | 0         | 0.143484  | 1.79769e+308 | 0.0076562 | 1         |
| 1110004F10Rik_j3 | 40.3823   | 44.4417   | 0.138191     | 0.177382  | 0.516667  |
| Nucb2_j2         | 0.0547584 | 0.518664  | 3.24365      | 0.0015647 | 0.0204437 |
| AK045786_j7      | 0         | 0.118855  | 1.79769e+308 | 0.155574  | 1         |
| Tmc5_j3          | 0.277862  | 0.779031  | 1.48731      | 0.0002335 | 0.0043572 |
| Tmc5             | 0         | 0.120187  | 1.79769e+308 | 0.0207952 | 1         |
| 6330503K22Rik_j4 | 0.0996402 | 0.330345  | 1.72917      | 0.0065829 | 0.0627745 |
| 9030624J02Rik_j3 | 8.80541   | 11.2426   | 0            | 1         | 1         |
| 2610020H08Rik_j5 | 0.0733318 | 0.106765  | 0.541921     | 0.445063  | 1         |
| Lyrm1_j1         | 0.175524  | 0.57829   | 0            | 1         | 1         |
| Lyrm1_j2         | 0.954312  | 0.872651  | 0            | 1         | 1         |
| Lyrm1            | 0.157812  | 0.36953   | 0            | 1         | 1         |

|                  |            |             |              |           |           |
|------------------|------------|-------------|--------------|-----------|-----------|
| Lyrm1_j6         | 0.00738974 | 0.33555     | 0            | 1         | 1         |
| E130201H02Rik    | 0.69325    | 1.02638     | 0.566114     | 0.0917932 | 0.372408  |
| BC030336_j1      | 0.128374   | 0.0769      | -0.739302    | 0.33629   | 1         |
| Polr3e_j2        | 0.69237    | 1.09384     | 0            | 1         | 1         |
| 4933427G17Rik_j1 | 0.067509   | 0.160463    | 1.24909      | 0.217298  | 0.563499  |
| Hs3st2_j4        | 0          | 0.0702016   | 0            | 1         | 1         |
| XLOC_029981      | 0.0547705  | 0.0895169   | 0            | 1         | 1         |
| Prkcb_j2         | 0.793314   | 0.68691     | -0.207772    | 0.611298  | 0.846879  |
| Tnrc6a_j2        | 0.452823   | 0.201699    | 0            | 1         | 1         |
| Slc5a11_j1       | 0.217162   | 0.159973    | 0            | 1         | 1         |
| XLOC_029995      | 0.196084   | 0.30217     | 0            | 1         | 1         |
| Il21r_j1         | 0.0430065  | 0.0848636   | 0.980592     | 0.399299  | 1         |
| Il21r            | 0.0320376  | 0.152606    | 2.25197      | 0.0541093 | 1         |
| D430042O09Rik_j2 | 0.914891   | 1.15742     | 0            | 1         | 1         |
| Tufm_j4          | 0.0339567  | 0.0780637   | 1.20096      | 0.35198   | 1         |
| Tufm_j5          | 5.48792    | 5.40627     | -0.0216273   | 0.916579  | 0.973963  |
| Apob48r_j1       | 4.78E-06   | 0.0660479   | 13.7534      | 0.990831  | 1         |
| XLOC_030004      | 0.106344   | 0.182995    | 0.783061     | 0.401893  | 0.72514   |
| XLOC_030006      | 0.332647   | 1.08201     | 1.70165      | 0.100874  | 0.393239  |
| Tbx6_j2          | 0          | 0.0694051   | 1.79769e+308 | 0.016664  | 1         |
| Hirip3_j2        | 2.06337    | 2.23159     | 0.11307      | 0.414794  | 0.73287   |
| Sez6l2_j4        | 2.38622    | 2.17416     | 0            | 1         | 1         |
| Sez6l2_j9        | 1.51554    | 4.59051     | 0            | 1         | 1         |
| XLOC_030012      | 0.149507   | 0.000175921 | -9.73107     | 1         | 1         |
| Itgal_j3         | 0          | 0.0850762   | 1.79769e+308 | 0.020982  | 1         |
| Prr14_j4         | 0.188597   | 0.303893    | 0.688252     | 0.245509  | 0.592921  |
| Prr14_j3         | 0.268987   | 0.38087     | 0.501765     | 0.329668  | 0.671845  |
| Prr14_j5         | 0          | 0.0985083   | 1.79769e+308 | 0.0362249 | 1         |
| Phkg2_j2         | 16.2044    | 16.1821     | -0.00198869  | 0.989665  | 0.996781  |
| Rnf40            | 9.70041    | 9.89664     | 0.0288929    | 0.780799  | 0.925867  |
| Fbxl19_j9        | 0          | 0.145084    | 0            | 1         | 1         |
| Setd1a_j4        | 0          | 0.103042    | 0            | 1         | 1         |
| Hsd3b7_j3        | 0.198857   | 0.152216    | 0            | 1         | 1         |
| Myst1_j3         | 1.19234    | 1.6539      | 0.47208      | 0.338384  | 0.678732  |
| Trim72_j1        | 0.05316    | 0.128943    | 1.27833      | 0.080492  | 1         |
| Itgam_j2         | 0.0159988  | 0.121378    | 2.92347      | 0.0105644 | 1         |
| Itgam            | 0.226312   | 0.411365    | 0.862107     | 0.0161938 | 0.121495  |
| Itgam_j5         | 0.493603   | 1.0055      | 1.02648      | 0.0041635 | 0.0441687 |
| Itgad_j1         | 0.0486859  | 0.106976    | 1.13571      | 0.324537  | 1         |
| Itgax_j7         | 0.10125    | 0.453195    | 2.16221      | 0.0373396 | 0.214213  |
| Tgfb1i1_j2       | 0.481549   | 0.397331    | -0.277339    | 0.692304  | 0.886092  |
| Tgfb1i1_j3       | 5.46471    | 7.5393      | 0.464287     | 0.0208701 | 0.1452    |
| Tacc2_j2         | 4.24213    | 3.68801     | 0            | 1         | 1         |
| Tacc2_j5         | 0.971699   | 1.25639     | 0            | 1         | 1         |
| Htra1_j5         | 19.3813    | 16.7338     | -0.211897    | 0.216424  | 0.562551  |
| Hmx3             | 0.125045   | 0.272083    | 1.1216       | 0.0234983 | 0.157309  |
| Dock1_j1         | 0.165937   | 0.585486    | 0            | 1         | 1         |

|                  |           |                        |            |           |           |
|------------------|-----------|------------------------|------------|-----------|-----------|
| XLOC_030062      | 0.0544603 | 0.111855               | 1.03836    | 0.242762  | 1         |
| Ptpre_j1         | 0.77912   | 0.882185               | 0          | 1         | 1         |
| Glrx3_j6         | 2.7803    | 3.48883                | 0.327498   | 0.291277  | 0.638477  |
| Ppp2r2d_j5       | 0         | 0.15314                | 0          | 1         | 1         |
| Jakmip3_j1       | 0.0580377 | 0.0609898              | 0.0715771  | 0.953959  | 1         |
| Jakmip3_j11      | 0         | 0.12251 1.79769e+308   |            | 0.0304005 | 1         |
| Jakmip3_j16      | 0         | 0.188831 1.79769e+308  |            | 0.0058886 | 0.0576655 |
| Dpysl4_j5        | 1.19024   | 1.34232                | 0.173468   | 0.488004  | 0.778578  |
| Lrrc27_j1        | 4.09407   | 3.70769                | -0.143017  | 0.360554  | 0.695475  |
| Gpr123_j3        | 0.432185  | 0.545161               | 0.335033   | 0.330695  | 0.672484  |
| Paax_j4          | 0.0936303 | 0.384536               | 2.03807    | 0.144689  | 0.472044  |
| Mtg1_j2          | 1.78342   | 1.37929                | -0.37072   | 0.417808  | 0.734876  |
| Athl1_j3         | 0.0553866 | 0.122727               | 1.14784    | 0.219904  | 1         |
| B4galnt4_j7      | 0.526445  | 0.468394               | -0.168563  | 0.586267  | 0.834297  |
| XLOC_030091      | 0.126648  | 0.245527               | 0.95506    | 0.371509  | 0.704412  |
| Rassf7_j2        | 0.103622  | 0.185233               | 0.838002   | 0.451521  | 0.756717  |
| Eps8l2_j4        | 0         | 0.0818511 1.79769e+308 |            | 0.0053833 | 1         |
| Taldo1_j2        | 3.55334   | 7.99812                | 0          | 1         | 1         |
| Rplp2_j5         | 0         | 0.309941 1.79769e+308  |            | 0.0807765 | 0.345975  |
| Cd151_j6         | 0.570863  | 1.2493                 | 0          | 1         | 1         |
| Cd151_j7         | 0.328603  | 0.50148                | 0          | 1         | 1         |
| Cd151_j8         | 0.125333  | 0.32552                | 0          | 1         | 1         |
| Lsp1_j3          | 0         | 0.0650663 1.79769e+308 |            | 0.0848257 | 1         |
| Tnnt3_j1         | 0.0660026 | 0.118213               | 0.84079    | 0.349961  | 1         |
| Cd81_j5          | 5.52879   | 7.52505                | 0          | 1         | 1         |
| Kcnq1_j3         | 0.0880245 | 0.211574               | 1.26519    | 0.0046259 | 0.0478493 |
| Dhcr7_j1         | 0.410539  | 0.431091               | 0.0704742  | 0.892295  | 0.965873  |
| XLOC_030120      | 0         | 0.0565495 1.79769e+308 |            | 0.163074  | 1         |
| Shank2_j4        | 2.43E-05  | 0.281624               | 13.5018    | 0.880132  | 0.961722  |
| Shank2_j3        | 0.190933  | 0.000461019            | -8.69402   | 0.257753  | 0.606502  |
| Fgf3_j1          | 0.736978  | 2.69131                | 0          | 1         | 1         |
| Fgf3_j2          | 0.370128  | 2.3273                 | 0          | 1         | 1         |
| Nlrp12_j2        | 0.0887262 | 0.0901088              | 0.0223071  | 0.988272  | 1         |
| Nlrp12_j6        | 0         | 0.0489317 1.79769e+308 |            | 0.0889168 | 1         |
| Nlrp12_j7        | 0.0461714 | 0.0519903              | 0.171245   | 0.868415  | 1         |
| XLOC_030127      | 0         | 0.103265 1.79769e+308  |            | 0.0451121 | 1         |
| Tmc4_j4          | 0.382531  | 0.685787               | 0          | 1         | 1         |
| Mboat7_j3        | 5.53614   | 6.09297                | 0          | 1         | 1         |
| Lilrb3_j2        | 0.114222  | 0.503541               | 2.14027    | 0.0777855 | 0.337705  |
| Lilrb3_j3        | 0.108197  | 0.297271               | 1.45812    | 0.0577355 | 0.28179   |
| Lilrb3_j12       | 0.20536   | 0.199792               | -0.0396573 | 0.959154  | 0.988355  |
| Lilrb3_j13       | 0.111362  | 0.292976               | 1.39552    | 0.260506  | 0.609215  |
| Ppp1r12c_j3      | 16.4858   | 22.0642                | 0          | 1         | 1         |
| 6030429G01Rik_j5 | 0.471496  | 0.605769               | 0.361524   | 0.30293   | 0.648734  |
| 6030429G01Rik_j9 | 0.034011  | 0.0634623              | 0.899899   | 0.525589  | 1         |
| Ppp6r1_j2        | 0.359722  | 0.446041               | 0          | 1         | 1         |
| Ppp6r1_j8        | 9.57473   | 8.98599                | 0          | 1         | 1         |

|                  |           |           |              |           |           |
|------------------|-----------|-----------|--------------|-----------|-----------|
| Gm1078_j2        | 0.333219  | 0.309658  | -0.105797    | 0.788391  | 0.929506  |
| Zim1_j3          | 1.47E-05  | 0.0914308 | 12.6051      | 0.972667  | 1         |
| Peg3_j1          | 13.4523   | 8.30626   | 0            | 1         | 1         |
| Zfp772           | 1.04462   | 0.907881  | 0            | 1         | 1         |
| Clcn4-2_j1       | 0.897872  | 0.738237  | 0            | 1         | 1         |
| Zfp551_j1        | 0.277675  | 0.382829  | 0.463299     | 0.184072  | 0.524679  |
| Zscan18_j4       | 0.755894  | 0.556588  | -0.441574    | 0.0310768 | 0.190042  |
| XLOC_030169      | 0.0389291 | 0.104414  | 1.42339      | 0.247587  | 1         |
| Ube2m_j2         | 3.46003   | 4.93763   | 0            | 1         | 1         |
| Mzf1_j2          | 0.0906947 | 0.103829  | 0            | 1         | 1         |
| Mzf1_j5          | 0.0493762 | 0.138315  | 0            | 1         | 1         |
| 6330408A02Rik    | 0.542416  | 0.482285  | 0            | 1         | 1         |
| Sepw1_j2         | 0         | 0.914526  | 1.79769e+308 | 0.0020296 | 0.0252684 |
| Gltscr2_j2       | 0.701493  | 1.02652   | 0            | 1         | 1         |
| Ccdc9_j4         | 0.699238  | 0.916362  | 0.390135     | 0.181794  | 0.522017  |
| Fkrp_j1          | 2.13103   | 3.89513   | 0            | 1         | 1         |
| Calm3_j5         | 0.32438   | 0.394452  | 0            | 1         | 1         |
| XLOC_030201      | 0.156386  | 0.348209  | 1.15485      | 0.0060946 | 0.0592898 |
| XLOC_030201      | 0.111134  | 0.240252  | 1.11225      | 0.0849469 | 0.355671  |
| Ccdc61_j3        | 1.5287    | 1.30143   | -0.232214    | 0.421209  | 0.737332  |
| Ccdc61_j4        | 0.118538  | 0.170138  | 0.521356     | 0.572191  | 0.827134  |
| Qpctl_j1         | 0.153425  | 0.0132989 | 0            | 1         | 1         |
| Vasp_j2          | 8.73903   | 7.78046   | 0            | 1         | 1         |
| AK020867_j2      | 0.0123935 | 0.0563684 | 2.18531      | 0.465315  | 1         |
| Mark4_j5         | 0         | 0.422915  | 0            | 1         | 1         |
| Lrrc68_j4        | 0.196681  | 0.16161   | 0            | 1         | 1         |
| Clasrp_j10       | 0.837427  | 0.813462  | -0.0418874   | 0.907697  | 0.970898  |
| Pvrl2_j1         | 0         | 0.0480633 | 0            | 1         | 1         |
| Bcam_j3          | 0.946672  | 1.50908   | 0            | 1         | 1         |
| Bcam_j4          | 0.155557  | 0.286575  | 0            | 1         | 1         |
| Bcl3_j3          | 3.73885   | 6.78347   | 0            | 1         | 1         |
| Zfp111_j1        | 0.111792  | 0.107601  | -0.0551285   | 0.91832   | 1         |
| Zfp109           | 0.313645  | 0.349628  | 0.15669      | 0.654104  | 0.867648  |
| Zfp61_j3         | 1.10989   | 1.13046   | 0.0264924    | 0.936293  | 0.980422  |
| Zfp94_j4         | 0         | 0.22541   | 1.79769e+308 | 0.0005088 | 0.0082556 |
| Zfp94_j5         | 0         | 0.0573094 | 1.79769e+308 | 0.0598632 | 1         |
| Erf_j2           | 0.128333  | 0.932028  | 2.86048      | 2.61E-08  | 1.66E-06  |
| Gm7092_j1        | 0.254506  | 0.151181  | -0.751425    | 0.0975817 | 0.385963  |
| Ccdc97_j3        | 0         | 0.457807  | 0            | 1         | 1         |
| Hnrnpul1_j2      | 0.43262   | 0.364994  | 0            | 1         | 1         |
| Axl              | 0.157172  | 1.11094   | 0            | 1         | 1         |
| Rab4b_j2         | 11.8078   | 14.9991   | 0            | 1         | 1         |
| Rab4b_j3         | 18.8199   | 24.081    | 0            | 1         | 1         |
| Ltbp4_j2         | 1.05392   | 1.50687   | 0            | 1         | 1         |
| Spnb4_j6         | 8.86578   | 8.50069   | -0.0606682   | 0.580925  | 0.831876  |
| Spnb4_j13        | 0.0347376 | 0.0475599 | 0.453248     | 0.771013  | 1         |
| 1700049G17Rik_j1 | 0.0382243 | 0.121892  | 1.67304      | 0.413475  | 1         |

|               |             |           |              |           |           |
|---------------|-------------|-----------|--------------|-----------|-----------|
| Supt5h_j3     | 24.8352     | 31.792    | 0            | 1         | 1         |
| Plekhg2_j1    | 0.185559    | 0.0680748 | 0            | 1         | 1         |
| Pak4_j4       | 0.493502    | 0.680289  | 0            | 1         | 1         |
| Pak4_j5       | 0.350714    | 0.664457  | 0            | 1         | 1         |
| C330005M16Rik | 0.222829    | 0.401382  | 0.84904      | 0.0152785 | 0.116493  |
| Ryr1_j1       | 0           | 0.0661791 | 1.79769e+308 | 0.0696649 | 1         |
| Kcnk6         | 0           | 0.0592529 | 1.79769e+308 | 0.1627    | 1         |
| Sipa1l3_j2    | 2.01977     | 1.95598   | -0.0462953   | 0.818958  | 0.941314  |
| XLOC_030290   | 0.203164    | 0.361029  | 0.829469     | 0.125513  | 0.44131   |
| XLOC_030290   | 0           | 0.160696  | 1.79769e+308 | 0.000277  | 0.0050067 |
| Zfp14         | 0           | 0.691809  | 0            | 1         | 1         |
| Zfp14_j1      | 0.343249    | 0.347494  | 0            | 1         | 1         |
| Zfp82_j4      | 0.627513    | 0.6118    | -0.0365853   | 0.942903  | 0.982712  |
| Zfp146_j1     | 3.6195      | 3.89691   | 0            | 1         | 1         |
| Capns1_j4     | 445.963     | 526.471   | 0            | 1         | 1         |
| Capns1_j5     | 0           | 0.475803  | 0            | 1         | 1         |
| Wdr62_j9      | 0.0655054   | 0.443816  | 2.76028      | 0.0010032 | 0.0143607 |
| Wdr62_j13     | 0.11577     | 0.239758  | 1.05032      | 0.164248  | 0.500214  |
| Wdr62_j14     | 0.210769    | 0.258392  | 0.293895     | 0.503898  | 0.787293  |
| Hcst          | 0.155944    | 0.145221  | -0.10277     | 0.883068  | 0.962848  |
| Arhgap33_j1   | 1.24945     | 2.28119   | 0            | 1         | 1         |
| Arhgap33_j2   | 1.63148     | 1.14624   | 0            | 1         | 1         |
| Wbp7_j1       | 1.20125     | 1.76858   | 0            | 1         | 1         |
| Zbtb32_j4     | 0.0053082   | 0.218676  | 5.36443      | 0.0116479 | 0.095923  |
| Upk1a_j1      | 0.0750798   | 0.119201  | 0.666897     | 0.369491  | 1         |
| Rbm42_j1      | 12.2218     | 13.8212   | 0.177428     | 0.167668  | 0.50417   |
| Rbm42_j8      | 0.0993914   | 0.157061  | 0.660136     | 0.465805  | 1         |
| Usf2_j3       | 8.96936     | 9.908     | 0            | 1         | 1         |
| Lsr_j12       | 0.102829    | 0.271102  | 1.39859      | 0.0696669 | 0.31662   |
| Lsr_j7        | 0.130457    | 0.181015  | 0.472534     | 0.482994  | 0.775864  |
| Fxyd5_j1      | 0.988766    | 1.49042   | 0            | 1         | 1         |
| Fxyd5_j2      | 0           | 0.0469468 | 0            | 1         | 1         |
| Hpn_j1        | 0.00190643  | 0.403291  | 7.72481      | 0.516667  | 0.795178  |
| Scn1b_j6      | 0.787494    | 0.786816  | -0.00124234  | 0.998148  | 0.999228  |
| Gramd1a_j6    | 11.0532     | 12.0088   | 0            | 1         | 1         |
| Wtip_j2       | 4.73401     | 5.38801   | 0.186689     | 0.375577  | 0.707831  |
| Lsm14a_j5     | 0.109612    | 0.145934  | 0            | 1         | 1         |
| Lsm14a_j4     | 0.585421    | 1.19318   | 0            | 1         | 1         |
| Cebpg_j2      | 0.000172924 | 2.56228   | 0            | 1         | 1         |
| Pdcd5_j8      | 0.0401449   | 0.0522837 | 0.381144     | 0.804651  | 1         |
| Zfp507_j7     | 8.36E-05    | 0.0587194 | 0            | 1         | 1         |
| XLOC_030343   | 1.41306     | 1.35326   | -0.0623845   | 0.80114   | 0.933726  |
| XLOC_030343   | 0.198157    | 0.158922  | -0.318318    | 0.611914  | 0.847166  |
| XLOC_030343   | 0.610033    | 0.600075  | -0.0237451   | 0.931328  | 0.979067  |
| C80913_j5     | 0.120023    | 1.22007   | 0            | 1         | 1         |
| C80913_j6     | 0           | 0.520203  | 0            | 1         | 1         |
| C80913_j7     | 1.15117     | 0.965773  | 0            | 1         | 1         |

|                  |             |           |              |           |           |
|------------------|-------------|-----------|--------------|-----------|-----------|
| Pop4_j3          | 0.000547196 | 0.875249  | 0            | 1         | 1         |
| AK081136_j1      | 0.25252     | 0.126136  | -1.00142     | 0.0990862 | 0.389479  |
| AW146154         | 0.231865    | 0.647388  | 1.48134      | 0.000287  | 0.0051553 |
| AW146154_j1      | 0.398239    | 0.272804  | -0.54577     | 0.395486  | 0.72057   |
| AW146154         | 1.27163     | 2.18671   | 0.78208      | 0.0089158 | 0.0786063 |
| Gm5593           | 0.198887    | 0.286607  | 0.527128     | 0.301466  | 0.647827  |
| BC063263_j4      | 0           | 0.0537976 | 0            | 1         | 1         |
| Zfp715_j1        | 0.55639     | 1.01343   | 0            | 1         | 1         |
| Cd33_j1          | 0           | 0.0637335 | 1.79769e+308 | 0.0162445 | 1         |
| Siglece_j1       | 0           | 0.128919  | 1.79769e+308 | 0.0288022 | 1         |
| Siglece_j2       | 0           | 0.0986232 | 1.79769e+308 | 0.0416149 | 1         |
| AK134755_j5      | 0.0574518   | 0.124907  | 1.12043      | 0.309232  | 1         |
| Gm10109_j2       | 0.35191     | 0.319566  | -0.139089    | 0.847711  | 0.951788  |
| 1700028J19Rik_j2 | 0.0673298   | 0.0992327 | 0.55957      | 0.692414  | 1         |
| 1700028J19Rik_j6 | 0.0958161   | 0.0740397 | -0.371969    | 0.794757  | 1         |
| 1700028J19Rik_j5 | 0           | 0.0848893 | 1.79769e+308 | 0.101668  | 1         |
| 1700008O03Rik_j5 | 0           | 0.0722362 | 0            | 1         | 1         |
| 1700008O03Rik_j8 | 0           | 0.106112  | 0            | 1         | 1         |
| Mybpc2_j4        | 0.120138    | 0.105731  | -0.184287    | 0.710296  | 1         |
| Ap2a1_j2         | 2.16518     | 2.58515   | 0            | 1         | 1         |
| Ap2a1_j7         | 6.17155     | 4.5955    | 0            | 1         | 1         |
| Cpt1c_j5         | 4.06966     | 6.38153   | 0            | 1         | 1         |
| Bcl2l12_j1       | 0.378765    | 0.383642  | 0.0184585    | 0.971754  | 0.991962  |
| Scaf1_j4         | 1.92609     | 1.83657   | 0            | 1         | 1         |
| Prr12_j6         | 2.06443     | 2.36762   | 0            | 1         | 1         |
| Fcgrt            | 1.65648     | 1.92801   | 0.218994     | 0.436974  | 0.747343  |
| Rps11_j2         | 13.2078     | 13.4608   | 0.0273754    | 0.896357  | 0.967019  |
| Rpl13a_j3        | 6.31436     | 8.43173   | 0.417192     | 0.0456841 | 0.24468   |
| Rpl13a_j4        | 0           | 1.68458   | 1.79769e+308 | 3.43E-06  | 0.0001217 |
| Flt3l_j1         | 0.489634    | 0.417962  | -0.228333    | 0.62919   | 0.855844  |
| Flt3l_j2         | 0           | 0.197638  | 1.79769e+308 | 0.0020339 | 0.0253088 |
| Flt3l_j5         | 0.398566    | 0.367648  | -0.116493    | 0.808081  | 0.936878  |
| Flt3l_j6         | 0.853144    | 0.637058  | -0.421366    | 0.180907  | 0.520777  |
| Ccdc155_j1       | 0.0313759   | 0.102489  | 1.70774      | 0.134833  | 1         |
| Ccdc155_j9       | 0           | 0.0610965 | 1.79769e+308 | 0.0820996 | 1         |
| Trpm4_j1         | 0.345104    | 0.362346  | 0            | 1         | 1         |
| Trpm4_j7         | 0.193277    | 0.227426  | 0            | 1         | 1         |
| Ruvbl2_j1        | 0.0261683   | 0.258498  | 0            | 1         | 1         |
| Ruvbl2_j3        | 0.252754    | 0.253703  | 0            | 1         | 1         |
| Dhdh_j1          | 0.678833    | 0.470125  | 0            | 1         | 1         |
| AK049852_j2      | 0.553775    | 0.716553  | 0.371774     | 0.0768    | 0.335039  |
| Sec1_j1          | 0           | 0.158054  | 1.79769e+308 | 0.0069992 | 0.0658421 |
| Grin2d_j5        | 0.395624    | 0.336795  | -0.232257    | 0.589385  | 0.836031  |
| Sergef_j6        | 1.2013      | 1.35094   | 0.169369     | 0.685584  | 0.882707  |
| Saal1_j1         | 0.163066    | 0.419714  | 1.36395      | 0.00583   | 0.0572066 |
| Tsg101_j3        | 0.0659067   | 0.040682  | -0.696033    | 0.666971  | 1         |
| Uevld_j1         | 3.88458     | 3.42602   | -0.181227    | 0.146339  | 0.474606  |



|                   |           |           |              |           |           |
|-------------------|-----------|-----------|--------------|-----------|-----------|
| Ptpn5_j1          | 0         | 0.149493  | 0            | 1         | 1         |
| Mrgpra3_j1        | 0.64949   | 0.635025  | 0            | 1         | 1         |
| Mrgpra3_j4        | 1.08939   | 0.90785   | 0            | 1         | 1         |
| XLOC_030432       | 0.288016  | 0.352982  | 0            | 1         | 1         |
| XLOC_030434       | 0.462862  | 0.639418  | 0.466178     | 0.0755717 | 0.331932  |
| XLOC_030435       | 0         | 0.0808312 | 1.79769e+308 | 0.0019622 | 1         |
| Mrgprx1_j1        | 1.01633   | 1.06024   | 0.0610197    | 0.714442  | 0.89656   |
| XLOC_030439       | 0.182878  | 0.17883   | -0.0322912   | 0.973265  | 0.992283  |
| XLOC_030443       | 0.0224829 | 0.087171  | 1.95502      | 0.163776  | 1         |
| XLOC_030443       | 0.0620572 | 0.0934933 | 0.591264     | 0.49178   | 1         |
| Gabra5_j1         | 0         | 0.593854  | 0            | 1         | 1         |
| Gabra5_j2         | 0         | 1.10117   | 0            | 1         | 1         |
| C230091D08Rik_j1  | 0.565143  | 0.465269  | -0.280551    | 0.522955  | 0.799177  |
| XLOC_030455       | 0.429107  | 0.401286  | -0.0967065   | 0.794288  | 0.931391  |
| XLOC_030455       | 0         | 0.0873222 | 1.79769e+308 | 0.0610684 | 1         |
| lpw_j1            | 2.69835   | 2.19306   | -0.299133    | 0.118821  | 0.428894  |
| Snrpn_j1          | 22.4431   | 20.2795   | 0            | 1         | 1         |
| Snrpn_j12         | 177.116   | 193.599   | 0            | 1         | 1         |
| Fan1_j4           | 0.881228  | 0.960613  | 0.12444      | 0.679752  | 0.879568  |
| Fan1_j5           | 0         | 0.0483324 | 1.79769e+308 | 0.101375  | 1         |
| Fan1_j6           | 0.330276  | 0.509905  | 0.626558     | 0.102583  | 0.396835  |
| Tjp1_j2           | 0.127781  | 0.161864  | 0.341113     | 0.496132  | 0.783139  |
| Lrrk1_j2          | 1.11506   | 1.0901    | -0.0326646   | 0.900123  | 0.968237  |
| Lrrk1_j3          | 0.38857   | 0.443407  | 0.190455     | 0.466511  | 0.766112  |
| AK038598_j6       | 0         | 0.0683927 | 1.79769e+308 | 0.127187  | 1         |
| Mef2a_j6          | 0.858789  | 0.551072  | 0            | 1         | 1         |
| Sym_j2            | 0         | 0.346679  | 0            | 1         | 1         |
| Mctp2_j5          | 0.0338518 | 0.0514623 | 0            | 1         | 1         |
| AK043101_j1       | 0.144969  | 0.130946  | 0            | 1         | 1         |
| Chd2_j1           | 0.924255  | 0.895922  | -0.0449192   | 0.841664  | 0.949957  |
| Sv2b_j5           | 0.480427  | 0.51577   | 0            | 1         | 1         |
| E430016F16Rik_j14 | 0         | 0.170293  | 1.79769e+308 | 0.0005993 | 0.0094781 |
| E430016F16Rik_j15 | 0.247277  | 0.271854  | 0.136707     | 0.755339  | 0.915526  |
| E430016F16Rik_j16 | 0         | 0.068612  | 1.79769e+308 | 0.0190812 | 1         |
| Kif7_j10          | 0.191489  | 0.278124  | 0.53847      | 0.273286  | 0.62238   |
| Kif7_j11          | 0         | 0.0739943 | 1.79769e+308 | 0.0503689 | 1         |
| Unc45a_j5         | 3.08355   | 3.8189    | 0            | 1         | 1         |
| Unc45a_j6         | 0.154739  | 0.194548  | 0            | 1         | 1         |
| Unc45a_j7         | 0.207488  | 0.172141  | 0            | 1         | 1         |
| Unc45a_j10        | 1.20367   | 1.05102   | 0            | 1         | 1         |
| Man2a2            | 2.26893   | 1.30253   | 0            | 1         | 1         |
| Fes_j2            | 0         | 0.0571337 | 1.79769e+308 | 0.144711  | 1         |
| Furin_j2          | 3.5291    | 3.23643   | 0            | 1         | 1         |
| Blm_j2            | 0         | 0.0879332 | 1.79769e+308 | 0.0028975 | 1         |
| Crtc3_j1          | 0.163393  | 1.31316   | 0            | 1         | 1         |
| Nmb_j1            | 99.6015   | 88.3316   | -0.173238    | 0.0589261 | 0.28542   |
| Rps17_j7          | 5.59868   | 6.47122   | 0.208951     | 0.21762   | 0.563618  |

|                  |            |           |              |           |           |
|------------------|------------|-----------|--------------|-----------|-----------|
| vesl-2_j2        | 0          | 0.210304  | 0            | 1         | 1         |
| Btbd1_j2         | 16.5369    | 16.2211   | -0.0278203   | 0.80513   | 0.935575  |
| Hdgfrp3          | 3.74805    | 3.37627   | 0            | 1         | 1         |
| Fam154b_j3       | 0.0959872  | 0.0795841 | 0            | 1         | 1         |
| Arnt2_j3         | 0.595323   | 0.823859  | 0            | 1         | 1         |
| Arnt2_j4         | 0.595323   | 0.823859  | 0            | 1         | 1         |
| Arnt2_j5         | 0.331216   | 0.748616  | 0            | 1         | 1         |
| Zfand6           | 3.64796    | 3.21297   | 0            | 1         | 1         |
| Zfand6_j1        | 5.95396    | 5.53898   | 0            | 1         | 1         |
| Folh1_j1         | 4.32041    | 4.87054   | 0            | 1         | 1         |
| Folh1_j4         | 0.5643     | 0.899255  | 0            | 1         | 1         |
| Prss23_j1        | 1.14585    | 1.24612   | 0            | 1         | 1         |
| Ankrd42_j4       | 0          | 0.44472   | 1.79769e+308 | 0.0074349 | 0.0689432 |
| Pcf11_j3         | 1.51491    | 2.03769   | 0.427705     | 0.0102759 | 0.0872665 |
| Myo7a            | 0.269955   | 0.280615  | 0.0558702    | 0.862586  | 0.956533  |
| Capn5_j4         | 0.233872   | 0.737905  | 0            | 1         | 1         |
| Capn5_j6         | 1.17437    | 5.98764   | 0            | 1         | 1         |
| Tsku_j1          | 0.164571   | 0.114204  | -0.527087    | 0.489028  | 0.77939   |
| Tsku             | 0.0283031  | 0.218531  | 2.94881      | 0.0137154 | 0.107918  |
| 2210018M11Rik_j4 | 0.0587176  | 0.116513  | 0            | 1         | 1         |
| 2210018M11Rik_j2 | 0.04933    | 0.0513393 | 0            | 1         | 1         |
| Serpinh1_j1      | 1.99009    | 3.65054   | 0            | 1         | 1         |
| Rnf169           | 0.0971854  | 0.588399  | 0            | 1         | 1         |
| Pold3_j3         | 0.146636   | 0.270167  | 0            | 1         | 1         |
| Relt_j4          | 0          | 0.237853  | 0            | 1         | 1         |
| Relt_j5          | 0.199874   | 0.0675291 | 0            | 1         | 1         |
| Arhgef17_j3      | 26.2108    | 26.6229   | 0.0225088    | 0.823518  | 0.943114  |
| Atg16l2_j1       | 0.0657993  | 0.117507  | 0.836597     | 0.150385  | 1         |
| Nup98_j2         | 0.00025662 | 1.40386   | 0            | 1         | 1         |
| Trim68_j5        | 0.232309   | 0.105491  | -1.13892     | 0.202499  | 0.546127  |
| Trim68_j6        | 0          | 0.878461  | 1.79769e+308 | 2.17E-07  | 1.07E-05  |
| Trim68_j7        | 0.0711282  | 0.109952  | 0.628383     | 0.473226  | 1         |
| Hbb-b1_j1        | 18.5502    | 22.6329   | 0.286982     | 0.0510683 | 0.261892  |
| 9230105E10Rik_j1 | 0.342808   | 0.383678  | 0.162497     | 0.763765  | 0.918837  |
| Trim30a_j1       | 0.120067   | 0.262726  | 1.12972      | 0.0642361 | 0.300919  |
| Trim30a_j2       | 0          | 0.153098  | 1.79769e+308 | 0.0091284 | 1         |
| Trim30d          | 0.0580738  | 0.0911212 | 0.6499       | 0.487262  | 1         |
| Fam160a2_j1      | 0.219712   | 0.24693   | 0.168489     | 0.645476  | 0.863342  |
| Apbb1_j4         | 61.0971    | 68.2235   | 0            | 1         | 1         |
| Apbb1            | 0.132558   | 0.188333  | 0            | 1         | 1         |
| Rrp8_j5          | 0.0654972  | 0.0492029 | -0.412689    | 0.539024  | 1         |
| Rrp8_j4          | 0.308642   | 0.401203  | 0.378399     | 0.161734  | 0.496701  |
| Dchs1_j1         | 0.0680464  | 0.0728917 | 0.0992353    | 0.893854  | 1         |
| Dchs1_j2         | 0.010509   | 0.0576297 | 2.45519      | 0.0260186 | 1         |
| Dchs1_j8         | 0.115633   | 0.172373  | 0.575986     | 0.293615  | 0.640505  |
| Mrpl17_j2        | 6.76566    | 7.06122   | 0.0616861    | 0.830826  | 0.945436  |
| Ric3_j1          | 8.68362    | 8.79753   | 0            | 1         | 1         |

|                  |           |           |              |           |           |
|------------------|-----------|-----------|--------------|-----------|-----------|
| Trim66_j2        | 0.367321  | 0.39059   | 0            | 1         | 1         |
| St5_j4           | 0         | 0.214589  | 0            | 1         | 1         |
| St5_j5           | 0         | 0.362315  | 0            | 1         | 1         |
| Tmem41b_j2       | 22.3877   | 21.503    | -0.0581672   | 0.580308  | 0.831506  |
| Eif4g2_j5        | 0.410762  | 0.319112  | 0            | 1         | 1         |
| Eif4g2_j8        | 0.298462  | 1.06816   | 0            | 1         | 1         |
| 1700012D14Rik_j1 | 0.229195  | 0.184299  | -0.31453     | 0.495267  | 0.782763  |
| Dkk3_j4          | 0         | 0.129043  | 0            | 1         | 1         |
| AK009335         | 0.237807  | 0.28866   | 0.279579     | 0.655582  | 0.868421  |
| Rras2_j1         | 4.24057   | 8.60704   | 1.02126      | 3.49E-12  | 4.57E-10  |
| Calca_j8         | 0.262456  | 0.488588  | 0            | 1         | 1         |
| Calca_j9         | 0         | 17.0605   | 0            | 1         | 1         |
| Sox6_j1          | 0.663266  | 0.726248  | 0.130876     | 0.533643  | 0.805224  |
| Plekha7_j3       | 0.200234  | 0.431121  | 1.10641      | 0.0026575 | 0.0313167 |
| Plekha7_j4       | 0         | 0.114021  | 1.79769e+308 | 0.0015061 | 1         |
| Plekha7_j11      | 0.132946  | 0.207433  | 0.641808     | 0.22172   | 0.568881  |
| Rps15a_j1        | 1.51105   | 1.81269   | 0            | 1         | 1         |
| Coq7_j1          | 9.22121   | 7.397     | -0.318017    | 0.154872  | 0.488084  |
| Gde1_j3          | 79.4706   | 90.6474   | 0            | 1         | 1         |
| Gprc5b_j2        | 0         | 0.0986172 | 0            | 1         | 1         |
| XLOC_030686      | 0.106658  | 0.0909586 | -0.229712    | 0.863875  | 1         |
| XLOC_030686      | 0.410845  | 0.15415   | -1.41426     | 0.0210746 | 0.14608   |
| Igsf6_j2         | 0         | 0.0503676 | 1.79769e+308 | 0.0776286 | 1         |
| Igsf6_j1         | 0.0803693 | 0.305281  | 1.92542      | 0.0040966 | 0.0436524 |
| Usp31_j2         | 5.35384   | 4.53329   | 0            | 1         | 1         |
| Palb2_j1         | 0         | 0.131914  | 1.79769e+308 | 0.0480591 | 1         |
| Palb2            | 0.0397565 | 0.120968  | 1.60536      | 0.216416  | 1         |
| Arhgap17_j5      | 0.435752  | 0.629444  | 0            | 1         | 1         |
| Arhgap17_j6      | 0.0323271 | 0.0854588 | 0            | 1         | 1         |
| Zkscan2          | 0.323624  | 0.348826  | 0.108189     | 0.713847  | 0.896268  |
| XLOC_030708      | 0         | 0.227832  | 1.79769e+308 | 0.0421911 | 0.232106  |
| Nsmce1_j6        | 4.16747   | 6.25999   | 0.586989     | 0.0118308 | 0.0971661 |
| Xpo6_j8          | 0.193     | 0.384811  | 0            | 1         | 1         |
| Atxn2l_j9        | 1.90178   | 1.86019   | 0            | 1         | 1         |
| Atxn2l_j10       | 0.97797   | 1.54462   | 0            | 1         | 1         |
| Eif3c_j1         | 0.0771849 | 0.0989708 | 0            | 1         | 1         |
| Coro1a_j5        | 1.42662   | 1.03951   | -0.456695    | 0.0067763 | 0.0642045 |
| Aldoa_j4         | 0.35831   | 0.333374  | 0            | 1         | 1         |
| Mvp_j8           | 1.23799   | 3.93575   | 0            | 1         | 1         |
| Mvp_j9           | 2.66333   | 4.13554   | 0            | 1         | 1         |
| Cd2bp2_j4        | 4.48008   | 4.32155   | 0            | 1         | 1         |
| Sept1_j5         | 0.323476  | 0.232695  | -0.475218    | 0.456279  | 0.759774  |
| Zfp747_j2        | 0.883089  | 0.93576   | 0.0835792    | 0.786501  | 0.928645  |
| Zfp764_j2        | 0         | 0.187061  | 1.79769e+308 | 0.007506  | 0.0693914 |
| Zfp629_j1        | 0.320517  | 1.54058   | 2.265        | 0         | 0         |
| Bcl7c_j2         | 0.168931  | 0.344275  | 0            | 1         | 1         |
| Stx1b_j3         | 4.74729   | 3.35252   | 0            | 1         | 1         |

|                  |             |           |               |           |           |
|------------------|-------------|-----------|---------------|-----------|-----------|
| Zfp668_j1        | 0.332583    | 0.181177  | -0.876318     | 0.0296737 | 0.184435  |
| Prss53_j6        | 0.0293075   | 0.166701  | 2.50792       | 0.0845308 | 0.354879  |
| Prss36_j2        | 1.49413     | 1.82913   | 0.291853      | 0.549878  | 0.815008  |
| BC017158_j1      | 0.168307    | 0.472417  | 0             | 1         | 1         |
| 2310057M21Rik_j2 | 1.95883     | 1.9961    | 0.0271907     | 0.854763  | 0.954015  |
| Mettl10_j3       | 0.161404    | 0         | -1.79769e+308 | 3.58E-10  | 3.24E-08  |
| Mettl10_j5       | 0.000157506 | 0.107586  | 9.41587       | 0.482386  | 1         |
| Mettl10_j4       | 0.108185    | 0.315868  | 1.54583       | 3.46E-05  | 0.0008731 |
| Mettl10_j8       | 3.97216     | 3.49479   | -0.184719     | 0.455324  | 0.759143  |
| Ctbp2_j2         | 0           | 0.102368  | 0             | 1         | 1         |
| Ctbp2_j3         | 0           | 0.127629  | 0             | 1         | 1         |
| Uros_j1          | 1.23381     | 1.13734   | 0             | 1         | 1         |
| Fam196a_j6       | 0           | 0.0865905 | 0             | 1         | 1         |
| Fam196a          | 0.0525651   | 0.581637  | 0             | 1         | 1         |
| Fam196a_j1       | 0.126102    | 0.266753  | 0             | 1         | 1         |
| Ebf3_j3          | 0.0422762   | 0.055239  | 0             | 1         | 1         |
| Ebf3             | 0.610456    | 0.995657  | 0             | 1         | 1         |
| Tcerg1_j2        | 0.0936326   | 1.56703   | 4.06488       | 2.40E-07  | 1.17E-05  |
| Mapk1ip1_j1      | 10.6743     | 10.3821   | 0             | 1         | 1         |
| Bnip3_j3         | 26.5612     | 18.7743   | 0             | 1         | 1         |
| Stk32c_j1        | 8.96957     | 9.58043   | 0             | 1         | 1         |
| Sirt3_j4         | 0.0244778   | 0.0946123 | 0             | 1         | 1         |
| Hras1_j4         | 0.22136     | 0.728029  | 1.7176        | 0.0228421 | 0.154422  |
| Deaf1_j2         | 16.8223     | 17.2857   | 0.0392049     | 0.719763  | 0.899338  |
| B230206H07Rik    | 0.267111    | 0.330285  | 0.306276      | 0.506552  | 0.789023  |
| B230206H07Rik_j6 | 0.184994    | 0.121449  | -0.607127     | 0.353949  | 0.690096  |
| Cend1            | 47.369      | 42.8248   | 0             | 1         | 1         |
| Slc25a22_j8      | 0.242399    | 0.0506195 | 0             | 1         | 1         |
| Slc25a22_j9      | 0.13467     | 0.032392  | 0             | 1         | 1         |
| Slc25a22         | 2.98918     | 2.16123   | 0             | 1         | 1         |
| Lrdd_j7          | 0           | 0.480247  | 1.79769e+308  | 9.42E-07  | 3.93E-05  |
| Lrdd_j2          | 0.720752    | 0.35321   | -1.02898      | 0.004732  | 0.0486565 |
| 2700078K21Rik_j3 | 7.33643     | 8.07673   | 0             | 1         | 1         |
| Dusp8_j1         | 4.23112     | 5.20562   | 0             | 1         | 1         |
| XLOC_030835      | 0           | 0.0830078 | 1.79769e+308  | 0.0799492 | 1         |
| 6330512M04Rik_j3 | 0.424224    | 0.894093  | 1.0756        | 0.070197  | 0.318168  |
| Cdkn1c_j2        | 0.128396    | 0.0393273 | -1.70699      | 0.211935  | 1         |
| Phlda2_j1        | 0.4035      | 0.522224  | 0.372099      | 0.452526  | 0.757642  |
| Nap1l4_j4        | 5.08439     | 5.31036   | 0             | 1         | 1         |
| Cars_j3          | 0.378374    | 0.569135  | 0             | 1         | 1         |
| Tnfrsf22_j2      | 0.202132    | 0.218855  | 0.114676      | 0.862097  | 0.956374  |
| Tnfrsf23_j1      | 0.730976    | 0.494163  | -0.564838     | 0.498208  | 0.783887  |
| Osbpl5_j4        | 0           | 0.0594403 | 0             | 1         | 1         |
| Nadsyn1_j2       | 0.429491    | 0.485355  | 0.176413      | 0.787059  | 0.92895   |
| Nadsyn1_j3       | 0.0798902   | 0.142978  | 0.8397        | 0.361509  | 1         |
| Cctn_j2          | 0           | 0.13555   | 0             | 1         | 1         |
| Ppfia1_j2        | 0.935191    | 1.09291   | 0             | 1         | 1         |

|                  |           |           |              |           |           |
|------------------|-----------|-----------|--------------|-----------|-----------|
| Ppfia1_j4        | 0.226672  | 0.186287  | 0            | 1         | 1         |
| Ano1_j1          | 1.12235   | 1.57572   | 0            | 1         | 1         |
| Tpcn2_j1         | 0.0588242 | 0.0353742 | -0.733715    | 0.621289  | 1         |
| Tpcn2_j4         | 0.507706  | 0.395207  | -0.361386    | 0.407273  | 0.727813  |
| Cnot3_j3         | 0.144743  | 0.148755  | 0.0394503    | 0.928685  | 0.97809   |
| Rps9_j2          | 11.7521   | 11.9714   | 0.0266691    | 0.893785  | 0.966325  |
| Leng8_j4         | 1.63017   | 0.953343  | 0            | 1         | 1         |
| Leng8_j5         | 7.78091   | 7.03074   | 0            | 1         | 1         |
| Brsk1_j1         | 38.6211   | 38.48     | 0            | 1         | 1         |
| Suv420h2_j6      | 1.147     | 1.04973   | -0.127846    | 0.637472  | 0.8596    |
| Suv420h2_j7      | 1.3433    | 1.45482   | 0.115062     | 0.607597  | 0.845335  |
| Zfp628_j1        | 0.0471705 | 0.184825  | 0            | 1         | 1         |
| A430110N23Rik_j1 | 0         | 0.0486334 | 1.79769e+308 | 0.0400444 | 1         |
| Zfp865_j3        | 3.18474   | 3.204     | 0            | 1         | 1         |
| Zfp580_j3        | 9.35078   | 10.6303   | 0            | 1         | 1         |
| Epn1_j1          | 9.70052   | 8.89029   | 0            | 1         | 1         |
| Epn1_j13         | 0         | 0.0624813 | 0            | 1         | 1         |
| Zfp444_j2        | 4.72504   | 4.96766   | 0.0722402    | 0.697728  | 0.888632  |
| Zfp444_j5        | 4.01116   | 3.58261   | -0.163009    | 0.428734  | 0.742555  |
| Zfp78_j2         | 0.0382184 | 0.08887   | 1.21743      | 0.565905  | 1         |
| Olfr1344_j2      | 0.0511277 | 0.0190392 | -1.42513     | 0.360437  | 1         |
| Olfr1344_j3      | 0         | 0.158439  | 1.79769e+308 | 0.0048056 | 0.0492313 |
| Usp29            | 0.164803  | 0.226646  | 0.459693     | 0.421798  | 0.737912  |
| Zfp110_j1        | 0         | 0.191362  | 0            | 1         | 1         |
| Zscan22          | 1.2448    | 1.48407   | 0.253653     | 0.268564  | 0.617508  |
| Zfp324           | 0.841473  | 0.798686  | 0            | 1         | 1         |
| Zfp446           | 0.17672   | 0.548746  | 1.63468      | 5.63E-05  | 0.0013192 |
| Trim28_j2        | 7.93481   | 8.61291   | 0            | 1         | 1         |
| Lig1_j2          | 2.37921   | 2.76666   | 0            | 1         | 1         |
| Napa_j6          | 23.3219   | 25.2622   | 0            | 1         | 1         |
| Slc8a2           | 0.637544  | 0.494931  | 0            | 1         | 1         |
| Zc3h4_j4         | 0.470911  | 0.609764  | 0            | 1         | 1         |
| Strn4            | 2.19786   | 2.55941   | 0            | 1         | 1         |
| XLOC_029505      | 0.197626  | 0.179456  | 0            | 1         | 1         |
| XLOC_029513      | 2.48127   | 2.41185   | -0.040936    | 0.942274  | 0.982456  |
| Fbxo46           | 1.7537    | 2.00497   | 0            | 1         | 1         |
| Ercc2_j3         | 1.11267   | 1.41999   | 0.351858     | 0.355911  | 0.691824  |
| Exoc3l2_j2       | 0.0563882 | 0.0468024 | -0.26881     | 0.835235  | 1         |
| Zfp235_j3        | 0.463675  | 0.316674  | 0            | 1         | 1         |
| Plaur_j3         | 6.24759   | 11.5826   | 0.890586     | 4.55E-10  | 4.02E-08  |
| Arhgef1_j2       | 0.285824  | 0.174165  | 0            | 1         | 1         |
| Arhgef1          | 0.516211  | 0.282541  | 0            | 1         | 1         |
| Arhgef1_j7       | 0.747165  | 0.73819   | 0            | 1         | 1         |
| Arhgef1_j10      | 1.81938   | 1.72747   | 0            | 1         | 1         |
| Zfp574_j3        | 0         | 0.252497  | 1.79769e+308 | 0.0002599 | 0.004765  |
| Zfp574_j4        | 0.512346  | 0.223266  | -1.19836     | 0.0155898 | 0.118035  |
| Cic_j1           | 0.596008  | 0.348894  | 0            | 1         | 1         |

|                  |           |           |              |           |           |
|------------------|-----------|-----------|--------------|-----------|-----------|
| Megf8_j1         | 0         | 0.0475138 | 1.79769e+308 | 0.010136  | 1         |
| 4732471J01Rik_j1 | 1.38355   | 1.24123   | 0            | 1         | 1         |
| Numb1_j2         | 0         | 0.19316   | 1.79769e+308 | 0.0374333 | 0.214459  |
| Akt2_j6          | 0.0297374 | 0.113406  | 1.93115      | 0.232932  | 1         |
| Akt2_j15         | 0.326186  | 0.851125  | 1.38367      | 3.34E-05  | 0.0008492 |
| Gm10046          | 0         | 0.214718  | 0            | 1         | 1         |
| Fbxo27_j4        | 2.58363   | 2.49745   | -0.0489434   | 0.832432  | 0.945929  |
| Sirt2_j4         | 10.4986   | 9.47985   | 0            | 1         | 1         |
| Sirt2_j3         | 8.3256    | 10.7892   | 0            | 1         | 1         |
| Sirt2_j2         | 9.09515   | 7.04136   | 0            | 1         | 1         |
| Ech1_j1          | 11.6109   | 11.5704   | -0.0050434   | 0.977287  | 0.993385  |
| Map4k1_j2        | 0.336663  | 0.263701  | -0.352402    | 0.464916  | 0.764951  |
| Map4k1_j5        | 0.128059  | 0.151364  | 0.24121      | 0.831978  | 1         |
| Rasgrp4_j2       | 0.0280096 | 0.056706  | 1.01758      | 0.548521  | 1         |
| Dpf1_j5          | 1.59325   | 1.28538   | -0.309779    | 0.217012  | 0.563119  |
| Zfp30_j3         | 0.214626  | 0.37405   | 0.801406     | 0.212544  | 0.557606  |
| Zfp30_j6         | 0.660345  | 0.692374  | 0.068333     | 0.835247  | 0.946964  |
| Zfp790           | 0.359712  | 0.366922  | 0            | 1         | 1         |
| Zfp790_j3        | 0         | 0.489876  | 0            | 1         | 1         |
| Zfp382_j1        | 0.32405   | 0.499533  | 0            | 1         | 1         |
| AI428936_j7      | 2.19394   | 2.0547    | -0.0945941   | 0.656385  | 0.868897  |
| Nfkbid_j5        | 0.131739  | 0.0845387 | -0.640001    | 0.590505  | 1         |
| Nfkbid_j9        | 0.448284  | 0.514679  | 0.19926      | 0.739069  | 0.908322  |
| Tmem149_j1       | 0.871402  | 0.985556  | 0.1776       | 0.556709  | 0.819233  |
| AK131900         | 0.0545738 | 0.168924  | 1.63009      | 0.266699  | 0.615721  |
| XLOC_029650      | 0.238795  | 0.0839545 | -1.5081      | 0.238972  | 0.586151  |
| Gm12781_j3       | 0.0309662 | 0.0891669 | 0            | 1         | 1         |
| Ankrd27_j3       | 2.14784   | 1.60019   | -0.424638    | 0.114596  | 0.421224  |
| XLOC_029665      | 0.23302   | 0.199621  | -0.223194    | 0.44184   | 0.750327  |
| XLOC_029665      | 4.88E-05  | 0.244253  | 12.2882      | 0.650995  | 0.866065  |
| XLOC_029665      | 0         | 0.0883446 | 1.79769e+308 | 2.35E-05  | 1         |
| Vstm2b_j3        | 2.21829   | 1.04607   | -1.08447     | 0.0042663 | 0.0449979 |
| Zfp788_j4        | 0.0709277 | 0.154116  | 0            | 1         | 1         |
| Zfp788_j3        | 0.353307  | 0.470785  | 0            | 1         | 1         |
| Zfp788_j2        | 0.219286  | 0.329786  | 0            | 1         | 1         |
| Etfb_j5          | 4.72397   | 6.1228    | 0.37419      | 0.179471  | 0.519116  |
| Klk5_j6          | 0         | 0.160085  | 1.79769e+308 | 0.0387243 | 0.219265  |
| Shank1_j7        | 0.0578463 | 0.0557956 | -0.0520728   | 0.940066  | 1         |
| Syt3_j4          | 0.929737  | 0.692434  | 0            | 1         | 1         |
| Aspdh_j2         | 0.0942651 | 0.144028  | 0.611557     | 0.244169  | 1         |
| Napsa_j5         | 0.023054  | 0.161731  | 2.81051      | 0.383983  | 0.71322   |
| Kcnc3_j6         | 4.2895    | 2.22991   | -0.943826    | 5.49E-10  | 4.81E-08  |
| Kcnc3_j5         | 3.30908   | 1.57185   | -1.07396     | 1.01E-09  | 8.43E-08  |
| Kcnc3_j9         | 2.32649   | 1.34047   | -0.795416    | 0.0008435 | 0.0125078 |
| Nup62_j2         | 11.8024   | 10.9554   | 0            | 1         | 1         |
| Akt1s1           | 28.3922   | 35.4492   | 0.320259     | 0.0016787 | 0.0216975 |
| Pnkp             | 6.87447   | 7.21733   | 0            | 1         | 1         |

|             |            |           |              |           |           |
|-------------|------------|-----------|--------------|-----------|-----------|
| Irf3_j2     | 0.906978   | 0.877929  | 0            | 1         | 1         |
| Nosip_j2    | 10.9755    | 11.1879   | 0            | 1         | 1         |
| Pih1d1      | 5.63317    | 6.67219   | 0            | 1         | 1         |
| Plekha4_j1  | 0.932942   | 0.937579  | 0            | 1         | 1         |
| Hsd17b14_j3 | 0.275874   | 0.72184   | 1.38767      | 0.027605  | 0.175884  |
| Hsd17b14_j8 | 0          | 0.0570513 | 1.79769e+308 | 0.167447  | 1         |
| Rasip1_j4   | 1.80196    | 1.97675   | 0.133563     | 0.56229   | 0.822102  |
| Rasip1_j5   | 0.391824   | 0.597444  | 0.608596     | 0.19307   | 0.535465  |
| Rasip1_j8   | 2.98499    | 2.94958   | -0.0172144   | 0.944343  | 0.983433  |
| Lmtk3_j7    | 0.271652   | 0.233801  | 0            | 1         | 1         |
| AK133391_j1 | 0.340234   | 0.599307  | 0.816771     | 0.078356  | 0.339336  |
| Ccdc114_j2  | 0.0223899  | 0.0777389 | 1.79579      | 0.226644  | 1         |
| Ccdc114_j6  | 0.10738    | 0.0381261 | -1.49387     | 0.265694  | 1         |
| Ccdc114_j7  | 0.115927   | 0.158984  | 0.455667     | 0.525616  | 0.800855  |
| Ldha_j4     | 96.081     | 89.1636   | 0            | 1         | 1         |
| Tmem86a_j2  | 0          | 0.367106  | 1.79769e+308 | 0.002482  | 0.0296727 |
| Nav2_j3     | 0.148339   | 0.151761  | 0.0329049    | 0.936309  | 0.980422  |
| Nav2_j9     | 0.15818    | 0.22972   | 0.538307     | 0.23696   | 0.583799  |
| Gas2_j1     | 2.80552    | 1.82492   | -0.620435    | 1.57E-05  | 0.0004555 |
| Luzp2_j2    | 23.2657    | 17.7328   | 0            | 1         | 1         |
| Atp10a_j4   | 0.207111   | 0.198452  | -0.0616155   | 0.925347  | 0.976852  |
| Ube3a_j7    | 1.63645    | 1.3565    | -0.270683    | 0.11124   | 0.415214  |
| Otud7a_j3   | 0          | 0.0631344 | 1.79769e+308 | 0.116142  | 1         |
| XLOC_029771 | 0.28198    | 0.406267  | 0.526835     | 0.645413  | 0.863342  |
| XLOC_029771 | 0.334704   | 0.0701274 | -2.25484     | 0.352217  | 0.68925   |
| XLOC_029771 | 0.202703   | 0.181879  | -0.156382    | 0.89196   | 0.965687  |
| Adamts17_j1 | 0.497594   | 0.607388  | 0.28765      | 0.531427  | 0.803508  |
| BC070425_j7 | 0          | 0.119103  | 1.79769e+308 | 0.0836149 | 1         |
| Akap13_j4   | 0.332511   | 0.382041  | 0.200325     | 0.484913  | 0.776796  |
| Akap13_j9   | 0          | 0.155877  | 1.79769e+308 | 7.22E-05  | 1         |
| Ttll13_j6   | 0.00393172 | 0.0669839 | 0            | 1         | 1         |
| Zfp592_j3   | 0.0002812  | 1.20554   | 0            | 1         | 1         |
| Slc28a1_j1  | 0.041065   | 0.100168  | 1.28644      | 0.261583  | 1         |
| AK013794_j5 | 0.987626   | 1.02212   | 0.0495241    | 0.915197  | 0.973525  |
| Whamm_j3    | 0.419206   | 0.43167   | 0.0422673    | 0.943231  | 0.982886  |
| XLOC_029831 | 0.143217   | 0.189371  | 0.403013     | 0.555529  | 0.818323  |
| Fam103a1_j2 | 0.927663   | 1.15884   | 0.321003     | 0.407221  | 0.727764  |
| Fam103a1    | 25.6511    | 19.4571   | -0.398724    | 0.0002318 | 0.0043311 |
| Adamts13    | 0.336775   | 0.294242  | -0.194781    | 0.517845  | 0.796001  |
| XLOC_029837 | 0.10255    | 0.17389   | 0.761844     | 0.409835  | 0.730005  |
| AK132723_j2 | 0.0652608  | 0.0954345 | 0            | 1         | 1         |
| Me3_j2      | 0          | 0.213598  | 1.79769e+308 | 0.0100021 | 0.0855854 |
| Picalm_j1   | 1.78567    | 2.24058   | 0.327408     | 0.165544  | 0.502234  |
| Picalm_j4   | 17.516     | 20.246    | 0.208965     | 0.0687372 | 0.314212  |
| Sytl2_j3    | 0          | 1.04234   | 0            | 1         | 1         |
| Odz4_j4     | 0          | 0.248337  | 1.79769e+308 | 5.53E-10  | 4.84E-08  |
| Alg8_j3     | 0.169254   | 0.784178  | 2.21199      | 0.0009083 | 0.0132574 |

|                  |           |           |              |           |          |
|------------------|-----------|-----------|--------------|-----------|----------|
| Ints4_j1         | 0         | 0.0505073 | 1.79769e+308 | 0.0754354 | 1        |
| Ints4_j6         | 7.12412   | 8.76101   | 0.298385     | 0.151136  | 0.482046 |
| Rsf1_j2          | 2.08291   | 2.13721   | 0.0371326    | 0.761135  | 0.917801 |
| Lrrc32_j1        | 8.50E-06  | 0.0694212 | 12.9964      | 0.981886  | 1        |
| Prkrir_j3        | 0.736332  | 0.911567  | 0            | 1         | 1        |
| XLOC_029881      | 0.103401  | 0.113584  | 0.135509     | 0.854904  | 1        |
| XLOC_029881      | 0.0610417 | 0.067822  | 0.151957     | 0.897499  | 1        |
| XLOC_029881      | 0.0726433 | 0.1413    | 0.959856     | 0.366709  | 1        |
| Gdpd5_j3         | 0.0620425 | 0.0420757 | -0.560268    | 0.707013  | 1        |
| Gdpd5_j7         | 5.76331   | 7.59888   | 0.398888     | 0.0724019 | 0.323811 |
| Clpb_j5          | 0         | 0.865778  | 0            | 1         | 1        |
| 3200002M19Rik_j2 | 0.700229  | 0.548012  | 0            | 1         | 1        |
| 3200002M19Rik_j1 | 1.33553   | 1.16428   | 0            | 1         | 1        |
| 3200002M19Rik_j4 | 0.566625  | 0.890483  | 0            | 1         | 1        |
| 3200002M19Rik_j3 | 0.951766  | 0.881705  | 0            | 1         | 1        |
| 2400001E08Rik_j2 | 7.45496   | 7.07073   | -0.0763422   | 0.699562  | 0.889447 |
| 2400001E08Rik_j4 | 26.1627   | 28.3888   | 0.117812     | 0.339174  | 0.679473 |
| Numa1_j2         | 0.855126  | 1.0032    | 0            | 1         | 1        |
| Numa1_j8         | 11.6898   | 12.5925   | 0            | 1         | 1        |
| Trpc2_j1         | 0.559991  | 0.458849  | -0.287386    | 0.455734  | 0.759463 |
| Trpc2            | 1.96857   | 2.08083   | 0.0800108    | 0.656684  | 0.869048 |
| Trpc2_j2         | 0.451491  | 0.544708  | 0.270786     | 0.316364  | 0.660085 |
| Stim1_j4         | 0.906072  | 0.643107  | 0            | 1         | 1        |
| Olf558           | 0.0459285 | 0.12804   | 1.47914      | 0.34715   | 1        |
| Trim6_j3         | 0.136977  | 0.168802  | 0.301392     | 0.603303  | 0.843375 |
| Trim34a_j2       | 0.0648381 | 0.114205  | 0.816717     | 0.505568  | 1        |
| Trim34a_j1       | 0.171237  | 0.158912  | -0.107773    | 0.856148  | 0.954521 |
| Fxc1_j2          | 3.84508   | 5.00989   | 0            | 1         | 1        |
| Fxc1_j1          | 2.60581   | 3.55279   | 0            | 1         | 1        |
| XLOC_029922      | 0.197054  | 0.29559   | 0.585006     | 0.389159  | 0.716409 |
| Dnhd1_j8         | 0.0480138 | 0.0985538 | 1.03746      | 0.156413  | 1        |
| Dnhd1_j7         | 0.0432279 | 0.120977  | 1.48469      | 0.0395173 | 1        |
| Ilk_j1           | 17.5041   | 21.6321   | 0            | 1         | 1        |
| Syt9_j3          | 0.315048  | 0.135819  | 0            | 1         | 1        |
| Ppfibp2_j7       | 0         | 0.101724  | 1.79769e+308 | 0.0187823 | 1        |
| Ampd3_j2         | 3.15291   | 1.4799    | 0            | 1         | 1        |
| Ctr9_j1          | 0.138731  | 0.168159  | 0.277536     | 0.625645  | 0.853954 |
| Usp47            | 0.158035  | 0.173725  | 0.136555     | 0.762421  | 0.918127 |
| Arntl_j5         | 0.0327534 | 0.10754   | 1.71516      | 0.13677   | 1        |
| Arntl_j6         | 0.199753  | 0.444289  | 1.15328      | 0.0304406 | 0.187508 |
| Tmc5_j1          | 0.065941  | 0.194182  | 1.55816      | 0.0144262 | 0.11185  |
| 6330503K22Rik_j3 | 2.40338   | 2.14768   | -0.162285    | 0.435616  | 0.74641  |
| Lym1_j5          | 1.02998   | 1.07636   | 0            | 1         | 1        |
| Vwa3a_j2         | 0.0565017 | 0.065456  | 0.212231     | 0.905731  | 1        |
| XLOC_029978      | 0.0388537 | 0.0802593 | 1.04661      | 0.630959  | 1        |
| Hs3st2_j1        | 1.83255   | 1.21412   | 0            | 1         | 1        |
| Plk1_j4          | 0.123516  | 0.12181   | -0.020066    | 0.981508  | 1        |



|             |             |           |              |           |           |
|-------------|-------------|-----------|--------------|-----------|-----------|
| AK140221_j1 | 0           | 0.0657048 | 1.79769e+308 | 0.0718065 | 1         |
| Slc5a11_j7  | 0           | 0.089018  |              | 0 1       | 1         |
| Slc5a11_j11 | 0.0694001   | 0.0683357 |              | 0 1       | 1         |
| Slc5a11_j13 | 0.048343    | 0.0620301 |              | 0 1       | 1         |
| Il21r_j2    | 0           | 0.0526247 | 1.79769e+308 | 0.19143   | 1         |
| Rabep2_j2   | 0.365885    | 0.393288  | 0.104194     | 0.825111  | 0.943645  |
| Tufm_j2     | 0.526185    | 0.762616  | 0.535387     | 0.0832502 | 0.351738  |
| Apob48r_j2  | 0.175432    | 0.378152  | 1.10806      | 0.0715712 | 0.321704  |
| Gdpd3_j1    | 0.453423    | 2.03573   | 2.16662      | 4.66E-14  | 8.06E-12  |
| Gdpd3_j5    | 0.192604    | 0.480847  | 1.31994      | 0.0079601 | 0.0722989 |
| Ypel3_j1    | 136.247     | 166.562   | 0.28984      | 0.0014784 | 0.0195023 |
| Tbx6_j4     | 0.0162103   | 0.081217  | 2.32487      | 0.145604  | 1         |
| Sez6l2_j8   | 9.07804     | 11.6669   | 0            | 1         | 1         |
| Srcap_j3    | 0.596834    | 0.745204  | 0.320306     | 0.0992189 | 0.389817  |
| Orai3_j1    | 7.71622     | 8.47637   | 0            | 1         | 1         |
| Setd1a_j3   | 0.0200578   | 0.0621651 | 0            | 1         | 1         |
| Stx4a_j1    | 17.7995     | 21.6791   | 0.284469     | 0.146596  | 0.47498   |
| Zfp646_j3   | 0           | 0.125894  | 1.79769e+308 | 0.0001374 | 1         |
| Fus_j3      | 1.91031     | 2.43969   | 0            | 1         | 1         |
| Fus_j5      | 0.0654854   | 0.174248  | 0            | 1         | 1         |
| Trim72_j2   | 0.0658801   | 0.126256  | 0.938433     | 0.252862  | 1         |
| Trim72_j4   | 0.0596196   | 0.12277   | 1.0421       | 0.284765  | 1         |
| Itgam       | 0.0882726   | 0.293096  | 1.73134      | 0.0011993 | 0.0165459 |
| Itgax_j4    | 0           | 0.0532744 | 1.79769e+308 | 0.132457  | 1         |
| Itgax_j6    | 0           | 0.219636  | 1.79769e+308 | 0.0133093 | 0.105765  |
| Sec23ip_j3  | 1.11051     | 2.55521   | 1.20223      | 2.35E-06  | 8.77E-05  |
| Ppapdc1a_j6 | 0.105648    | 0.466772  | 2.14346      | 0.0335922 | 0.200268  |
| Wdr11_j2    | 6.88258     | 7.26642   | 0.0782941    | 0.605679  | 0.844613  |
| Tacc2_j3    | 0.131867    | 0.21617   | 0            | 1         | 1         |
| Plekha1_j4  | 0.879464    | 0.565227  | -0.637795    | 0.288501  | 0.636263  |
| Htra1_j4    | 0.176829    | 0.324079  | 0.873994     | 0.424772  | 0.740122  |
| XLOC_030053 | 0.0522878   | 0.177993  | 1.76727      | 0.275494  | 0.624571  |
| AK086971_j2 | 0.167001    | 0.236502  | 0.501999     | 0.595188  | 0.838658  |
| Lhpp_j2     | 0.000271672 | 0.104129  | 8.58229      | 0.863329  | 1         |
| Lhpp_j5     | 0           | 0.0562494 | 1.79769e+308 | 0.156234  | 1         |
| XLOC_030062 | 0.252613    | 0.215088  | -0.232       | 0.827738  | 0.944579  |
| XLOC_030062 | 0           | 0.0547389 | 1.79769e+308 | 0.111844  | 1         |
| Glrx3_j2    | 0.287495    | 0.194452  | -0.564127    | 0.0913979 | 0.371609  |
| XLOC_030066 | 5.11163     | 5.32716   | 0            | 1         | 1         |
| XLOC_030068 | 0.367892    | 0.307169  | -0.260247    | 0.618488  | 0.850115  |
| XLOC_030068 | 0.0618777   | 0.0955634 | 0.627038     | 0.547461  | 1         |
| XLOC_030067 | 0.0512481   | 0.129882  | 1.34163      | 0.36531   | 1         |
| XLOC_030069 | 0.603297    | 0.242554  | -1.31456     | 0.0083764 | 0.0750597 |
| Jakmip3_j6  | 0.0148604   | 0.214587  | 3.85202      | 0.0312905 | 0.190953  |
| Jakmip3_j13 | 0           | 0.064371  | 1.79769e+308 | 0.0963643 | 1         |
| Jakmip3_j14 | 1.95357     | 2.93405   | 0.586779     | 0.0063437 | 0.0611758 |
| Paox_j6     | 0.122674    | 0.0955152 | -0.361032    | 0.774546  | 1         |

|                   |           |                        |            |           |           |
|-------------------|-----------|------------------------|------------|-----------|-----------|
| Athl1_j5          | 1.2758    | 1.12091                | -0.186733  | 0.633935  | 0.858013  |
| B4galnt4_j8       | 0.663296  | 1.27587                | 0.943753   | 4.57E-05  | 0.0011052 |
| Pkp3_j1           | 0         | 0.0537631 1.79769e+308 |            | 0.100633  | 1         |
| XLOC_030093       | 4.77026   | 4.66637                | -0.0317684 | 0.901312  | 0.968662  |
| Lrrc56_j4         | 0.436846  | 0.49102                | 0.168657   | 0.670448  | 0.875338  |
| Lrrc56_j3         | 0.207302  | 0.0706845              | -1.55227   | 0.100931  | 0.393398  |
| Rassf7_j6         | 0.236365  | 0.10871                | -1.12054   | 0.273727  | 0.62288   |
| Phrf1_j6          | 0.295212  | 0.690228               | 0          | 1         | 1         |
| Rplp2             | 0         | 0.163662 1.79769e+308  |            | 0.10747   | 0.407603  |
| Rplp2_j7          | 0.813774  | 1.26808                | 0.639945   | 0.391492  | 0.71795   |
| Cd151_j3          | 115.407   | 117.626                | 0          | 1         | 1         |
| Tspan4_j1         | 3.24737   | 2.19223                | 0          | 1         | 1         |
| Ap2a2_j2          | 0.0756146 | 0.124209               | 0          | 1         | 1         |
| XLOC_030107       | 0.0772737 | 0.164633               | 1.09121    | 0.222923  | 0.569987  |
| Muc2_j4           | 0.0702244 | 0.147365               | 1.06935    | 0.465959  | 1         |
| Brsk2_j10         | 2.84501   | 2.61486                | 0          | 1         | 1         |
| Lsp1_j2           | 0.0750215 | 0.0704285              | -0.0911454 | 0.943871  | 1         |
| Mrpl23_j1         | 0.0728035 | 0.200379               | 1.46065    | 0.31911   | 0.662469  |
| Kcnq1_j1          | 0.0628145 | 0.0887492              | 0.498636   | 0.492926  | 1         |
| Kcnq1_j6          | 0.0632637 | 0.052151               | -0.278684  | 0.808549  | 1         |
| Kcnq1_j7          | 0.0489133 | 0.138868               | 1.50542    | 0.19584   | 1         |
| Slc22a18_j1       | 0.602488  | 0.569812               | -0.0804458 | 0.879182  | 0.961471  |
| XLOC_030120       | 0.0799694 | 0.111033               | 0.473472   | 0.708067  | 1         |
| Nlrp12_j3         | 0.0788595 | 0.131039               | 0.732639   | 0.288071  | 1         |
| Tmc4_j1           | 0.188521  | 0.0246357              | 0          | 1         | 1         |
| Mboat7_j5         | 1.67683   | 1.07934                | 0          | 1         | 1         |
| Lilrb3_j8         | 0         | 0.0675488 1.79769e+308 |            | 0.179898  | 1         |
| Lilrb3_j10        | 0         | 0.333148 1.79769e+308  |            | 0.0344785 | 0.203747  |
| Cdc42ep5_j2       | 0.213446  | 0.494602               | 0          | 1         | 1         |
| Rdh13_j1          | 2.77445   | 4.49268                | 0          | 1         | 1         |
| Rdh13_j2          | 0.619484  | 1.30703                | 0          | 1         | 1         |
| 6030429G01Rik_j10 | 8.44E-05  | 0.116987               | 10.4369    | 0.881078  | 1         |
| Ppp6r1_j9         | 0.60162   | 1.14259                | 0          | 1         | 1         |
| AK080857_j1       | 0.584783  | 0.402455               | 0          | 1         | 1         |
| Zfp787_j5         | 0.33708   | 0.131795               | -1.3548    | 0.135116  | 0.457301  |
| Peg3_j3           | 3.61386   | 2.02184                | 0          | 1         | 1         |
| Vmn2r29_j1        | 0.314299  | 1.22008                | 0          | 1         | 1         |
| Ube2m_j1          | 17.6023   | 23.7807                | 0          | 1         | 1         |
| Ube2m_j8          | 48.3953   | 48.634                 | 0          | 1         | 1         |
| Mzf1_j3           | 0.0231288 | 0.0479494              | 0          | 1         | 1         |
| 6330408A02Rik_j4  | 0.949129  | 0.751142               | 0          | 1         | 1         |
| Sepw1_j4          | 209.567   | 275.201                | 0.393075   | 1.62E-05  | 0.0004679 |
| Ehd2_j2           | 0         | 0.554282 1.79769e+308  |            | 7.45E-08  | 4.18E-06  |
| Gltscr1_j2        | 0.560397  | 1.20504                | 0          | 1         | 1         |
| Dhx34_j1          | 0.103443  | 0.362879               | 0          | 1         | 1         |
| Ccdc9_j6          | 0.503481  | 0.357709               | -0.493148  | 0.218654  | 0.564944  |
| Calm3_j3          | 0.380914  | 0.586786               | 0          | 1         | 1         |

|              |           |           |              |           |          |
|--------------|-----------|-----------|--------------|-----------|----------|
| Ccdc61_j2    | 0.0438321 | 0.244782  | 2.48144      | 0.0254721 | 0.166429 |
| Qpctl_j6     | 2.41724   | 2.41846   | 0            | 1         | 1        |
| Qpctl_j5     | 1.34114   | 1.60524   | 0            | 1         | 1        |
| XLOC_030204  | 0.0871504 | 0.103255  | 0.244635     | 0.841756  | 1        |
| Vasp_j1      | 0.511667  | 0.903022  | 0            | 1         | 1        |
| Klc3_j2      | 0.42671   | 0.441163  | 0.0480549    | 0.916285  | 0.973929 |
| mKIAA1860    | 4.43065   | 4.52496   | 0            | 1         | 1        |
| Mark4_j1     | 1.5404    | 2.55216   | 0            | 1         | 1        |
| Bloc1s3      | 0.911578  | 0.975605  | 0.0979311    | 0.714417  | 0.89656  |
| Clasrp_j3    | 0         | 0.118168  | 1.79769e+308 | 0.0332998 | 1        |
| Clasrp_j4    | 1.40402   | 1.55712   | 0.149312     | 0.597741  | 0.84047  |
| Clasrp_j5    | 0.0631138 | 0.108359  | 0.779798     | 0.409801  | 1        |
| Apoe_j1      | 980.275   | 1013.36   | 0            | 1         | 1        |
| Pvrl2_j2     | 1.43607   | 3.59346   | 0            | 1         | 1        |
| Bcam_j2      | 219.429   | 308.918   | 0            | 1         | 1        |
| Bcl3_j1      | 1.07889   | 2.43848   | 0            | 1         | 1        |
| XLOC_030225  | 0         | 0.0832946 | 0            | 1         | 1        |
| Zfp111       | 0.20049   | 0.131277  | -0.610913    | 0.288394  | 0.636119 |
| Zfp109_j2    | 0.0766276 | 0.069785  | -0.134948    | 0.864744  | 1        |
| Zfp61_j7     | 0         | 0.158575  | 1.79769e+308 | 0.0294498 | 0.183441 |
| Zfp94_j8     | 0.405159  | 0.627219  | 0.63048      | 0.275275  | 0.624386 |
| Cd177_j1     | 0         | 0.0808082 | 1.79769e+308 | 0.0962635 | 1        |
| Pou2f2       | 0         | 0.0853986 | 1.79769e+308 | 0.0135504 | 1        |
| Dedd2        | 0.983292  | 0.584396  | 0            | 1         | 1        |
| Tmem91       | 0.11743   | 0.212732  | 0.857238     | 0.229633  | 0.576763 |
| Ccdc97_j2    | 0         | 0.311762  | 0            | 1         | 1        |
| Hnrnpul1     | 1.69474   | 2.01054   | 0            | 1         | 1        |
| Axl_j3       | 0.593478  | 2.56431   | 0            | 1         | 1        |
| Cyp2s1_j2    | 0.76695   | 0.619369  | -0.308332    | 0.337712  | 0.678221 |
| Egln2_j4     | 13.3581   | 20.0346   | 0            | 1         | 1        |
| XLOC_030255  | 0.0605147 | 0.137709  | 1.18627      | 0.302521  | 1        |
| Map3k10_j3   | 6.4132    | 7.10747   | 0            | 1         | 1        |
| Timm50_j1    | 3.79298   | 5.69093   | 0.585336     | 0.0131158 | 0.104703 |
| Supt5h_j4    | 6.77743   | 6.16958   | 0            | 1         | 1        |
| Plekhg2_j5   | 0.825342  | 1.40885   | 0            | 1         | 1        |
| Actn4_j3     | 7.0114    | 7.1462    | 0.0274743    | 0.830845  | 0.945436 |
| Ryr1_j5      | 0.143817  | 0.0360016 | -1.9981      | 0.458836  | 0.761335 |
| Ryr1_j7      | 0.0426032 | 0.153912  | 1.85307      | 0.198487  | 1        |
| Fam98c_j4    | 1.51782   | 1.469     | -0.0471688   | 0.91716   | 0.974049 |
| Fam98c_j5    | 2.96895   | 2.24049   | -0.40614     | 0.0729489 | 0.325107 |
| Catsperg1_j1 | 0.115098  | 0.19674   | 0.773426     | 0.254548  | 0.602774 |
| Kcnk6_j1     | 0.094333  | 0.137988  | 0.548707     | 0.518532  | 1        |
| Zfp27_j2     | 0         | 0.350625  | 0            | 1         | 1        |
| Zfp27_j1     | 0.607945  | 0.215038  | 0            | 1         | 1        |
| Zfp82_j1     | 0         | 0.150514  | 1.79769e+308 | 0.0189629 | 1        |
| Zfp82_j3     | 0         | 0.156274  | 1.79769e+308 | 0.0149499 | 1        |
| Wdr62_j10    | 0.591327  | 0.625055  | 0.0800259    | 0.876654  | 0.960786 |

|                  |           |           |              |           |           |
|------------------|-----------|-----------|--------------|-----------|-----------|
| Arhgap33_j5      | 1.00295   | 1.47973   | 0            | 1         | 1         |
| Arhgap33_j6      | 1.64826   | 2.11538   | 0            | 1         | 1         |
| BC053749_j7      | 0.33647   | 0.384434  | 0.192257     | 0.66482   | 0.873063  |
| Wbp7_j8          | 0.545578  | 0.499298  | 0            | 1         | 1         |
| Zbtb32_j3        | 0.0460613 | 0.0823511 | 0.838231     | 0.377786  | 1         |
| Rbm42_j9         | 0.329495  | 0.628632  | 0.931959     | 0.30897   | 0.653841  |
| Rbm42_j10        | 0.286108  | 0.33683   | 0.235461     | 0.798864  | 0.933125  |
| Rbm42_j11        | 0         | 0.291013  | 1.79769e+308 | 0.0011945 | 0.0164932 |
| Usf2_j2          | 0.134925  | 0.314353  | 0            | 1         | 1         |
| Usf2_j1          | 0.049482  | 0.0180293 | 0            | 1         | 1         |
| Usf2_j8          | 0.298948  | 0.440564  | 0            | 1         | 1         |
| Fxyd7_j3         | 0         | 1.62616   | 0            | 1         | 1         |
| Fxyd7_j2         | 170.93    | 194.742   | 0            | 1         | 1         |
| Fxyd1_j1         | 2.57675   | 3.59752   | 0            | 1         | 1         |
| Gpi1_j1          | 0         | 0.0920365 | 0            | 1         | 1         |
| Gpi1_j2          | 68.8643   | 84.8707   | 0            | 1         | 1         |
| Gpi1             | 14.7656   | 11.2276   | 0            | 1         | 1         |
| XLOC_030329      | 0         | 0.168177  | 1.79769e+308 | 0.0573072 | 0.280543  |
| Chst8_j4         | 0         | 0.321656  | 1.79769e+308 | 0.0030275 | 0.0346794 |
| Pdcd5_j6         | 0.775936  | 0.604766  | -0.359562    | 0.390433  | 0.717228  |
| Zfp507_j1        | 1.86445   | 1.88218   | 0            | 1         | 1         |
| XLOC_030342      | 0.0490631 | 0.103224  | 1.07308      | 0.392103  | 1         |
| Pop4_j6          | 7.98774   | 10.4763   | 0            | 1         | 1         |
| AK081136_j5      | 0.0892243 | 0.0307435 | -1.53716     | 0.262925  | 1         |
| AW146154_j2      | 0         | 0.0951494 | 1.79769e+308 | 0.0911261 | 1         |
| AW146154_j3      | 0.677898  | 1.19321   | 0.815714     | 0.111446  | 0.415505  |
| Gm5595_j1        | 0.110722  | 0.14473   | 0.386415     | 0.686351  | 1         |
| Zfp715_j4        | 0         | 0.0634912 | 0            | 1         | 1         |
| Siglece_j4       | 0         | 0.237443  | 1.79769e+308 | 0.0390823 | 0.220549  |
| AK134755_j9      | 0.0926712 | 0.100656  | 0.119235     | 0.901028  | 1         |
| Clec11a_j1       | 0.093375  | 0.120662  | 0.369858     | 0.715811  | 1         |
| 1700008O03Rik_j6 | 0         | 0.230926  | 0            | 1         | 1         |
| Mybpc2_j2        | 0.767876  | 0.707789  | -0.117554    | 0.503314  | 0.787002  |
| Myh14_j3         | 1.62734   | 1.83278   | 0            | 1         | 1         |
| Cpt1c_j4         | 9.28456   | 8.66017   | 0            | 1         | 1         |
| Prmt1            | 22.9294   | 24.9085   | 0            | 1         | 1         |
| Prr12_j2         | 0.254504  | 0.215842  | 0            | 1         | 1         |
| Prr12_j1         | 0.38158   | 0.21022   | 0            | 1         | 1         |
| Flt3l_j7         | 0.204387  | 0.565117  | 1.46724      | 0.0424314 | 0.232815  |
| Ccdc155_j5       | 0.0603551 | 0.169017  | 1.48562      | 0.310422  | 0.655145  |
| Ccdc155_j7       | 0.0773984 | 0.131395  | 0.763538     | 0.51669   | 1         |
| Ccdc155_j6       | 0         | 0.0849356 | 1.79769e+308 | 0.075254  | 1         |
| Dkl1_j1          | 0.640315  | 1.04265   | 0.703401     | 0.0346136 | 0.204274  |
| Cd37_j3          | 0         | 0.166957  | 1.79769e+308 | 0.0355649 | 0.207791  |
| Trpm4_j4         | 6.29396   | 7.63484   | 0            | 1         | 1         |
| Trpm4_j5         | 0.0890353 | 0.0962752 | 0            | 1         | 1         |
| Snrnp70_j1       | 14.7776   | 15.2953   | 0            | 1         | 1         |

|                   |             |           |              |           |           |
|-------------------|-------------|-----------|--------------|-----------|-----------|
| Ruvbl2_j2         | 0.132875    | 0.124875  | 0            | 1         | 1         |
| Bax_j1            | 17.8672     | 26.3174   | 0            | 1         | 1         |
| Cyth2_j1          | 24.8786     | 29.2543   | 0            | 1         | 1         |
| Grwd1_j1          | 1.52483     | 2.28263   | 0.582047     | 0.1147    | 0.421286  |
| Sergef_j5         | 0.276914    | 0.0998936 | -1.47097     | 0.241432  | 0.588512  |
| Hps5              | 3.63342     | 2.88449   | 0            | 1         | 1         |
| Uevld_j3          | 0.0775637   | 0.10869   | 0.486772     | 0.721675  | 1         |
| Mrgpra3_j3        | 0.0239396   | 0.176361  | 0            | 1         | 1         |
| XLOC_030434       | 0.797554    | 0.824875  | 0.0485945    | 0.811471  | 0.938053  |
| Gabra5            | 0.337729    | 0.338622  | 0            | 1         | 1         |
| lpw_j5            | 0.772418    | 0.978617  | 0.341363     | 0.520309  | 0.797861  |
| Snrpn_j2          | 0.968414    | 0.488518  | 0            | 1         | 1         |
| Snrpn_j10         | 44.3615     | 44.8829   | 0            | 1         | 1         |
| A230057D06Rik_j4  | 0.652029    | 0.534863  | -0.285766    | 0.387152  | 0.714995  |
| Fan1_j1           | 0.0688061   | 0.147391  | 1.09904      | 0.222079  | 1         |
| Tjp1_j8           | 0.000139776 | 0.110198  | 9.62277      | 0.619649  | 1         |
| Aldh1a3_j1        | 0.000846643 | 0.0570275 | 6.07376      | 0.514323  | 1         |
| Aldh1a3_j2        | 0.0602343   | 0.057927  | -0.0563486   | 0.963071  | 1         |
| Asb7_j3           | 0.776952    | 0.548212  | 0            | 1         | 1         |
| AK038598_j8       | 0.0858396   | 0.128321  | 0.580044     | 0.570352  | 1         |
| Mef2a_j4          | 3.64604     | 4.7641    | 0            | 1         | 1         |
| Mef2a_j5          | 0.756152    | 2.65949   | 0            | 1         | 1         |
| Lrrc28            | 1.84638     | 1.67137   | 0            | 1         | 1         |
| Synm_j1           | 9.03413     | 5.60156   | 0            | 1         | 1         |
| Mctp2_j8          | 1.87375     | 1.51463   | 0            | 1         | 1         |
| Chd2_j11          | 0.270042    | 0.419502  | 0.635492     | 0.0101796 | 0.0866149 |
| Sv2b_j3           | 0           | 0.253493  | 0            | 1         | 1         |
| Ntrk3             | 0.0027994   | 0.303493  | 0            | 1         | 1         |
| Ntrk3_j6          | 0.187057    | 0.228332  | 0            | 1         | 1         |
| E430016F16Rik_j9  | 0.0842981   | 0.143138  | 0.763838     | 0.258504  | 1         |
| E430016F16Rik_j10 | 0.116715    | 0.272545  | 1.2235       | 0.0277717 | 0.176623  |
| Det1_j3           | 0.0588308   | 0.173601  | 1.56113      | 0.0287576 | 0.180514  |
| Det1_j2           | 0.175596    | 0.124511  | -0.495986    | 0.426855  | 0.74141   |
| Kif7_j8           | 0           | 0.072001  | 1.79769e+308 | 0.0319207 | 1         |
| Pex11a_j1         | 1.06937     | 1.32063   | 0            | 1         | 1         |
| Anpep_j2          | 0           | 0.0494762 | 1.79769e+308 | 0.0529654 | 1         |
| Anpep             | 0.233773    | 0.312924  | 0.420704     | 0.306857  | 0.652024  |
| Ap3s2_j1          | 6.83647     | 6.77299   | 0            | 1         | 1         |
| Ap3s2_j2          | 10.8551     | 9.90057   | 0            | 1         | 1         |
| ldh2_j1           | 1.45616     | 1.93199   | 0            | 1         | 1         |
| Rccd1_j1          | 0.510105    | 0.69722   | 0            | 1         | 1         |
| Unc45a_j8         | 1.03541     | 5.20078   | 0            | 1         | 1         |
| Fes_j4            | 0.000147478 | 0.41632   | 11.463       | 0.805156  | 0.935575  |
| Blm_j3            | 0.00125816  | 0.0893773 | 6.15052      | 0.136428  | 1         |
| Nmb_j4            | 2.19823     | 1.89253   | -0.216023    | 0.263431  | 0.612269  |
| XLOC_030530       | 0.190329    | 0.216065  | 0.18297      | 0.762581  | 0.918206  |
| XLOC_030530       | 0.0204216   | 0.0529016 | 1.37321      | 0.405263  | 1         |

|             |             |                        |           |           |           |
|-------------|-------------|------------------------|-----------|-----------|-----------|
| Rps17_j4    | 0.0360945   | 0.0750955              | 1.05695   | 0.279878  | 1         |
| Cpeb1_j8    | 6.1153      | 8.93225                | 0         | 1         | 1         |
| Cpeb1_j9    | 6.26758     | 6.30268                | 0         | 1         | 1         |
| Ap3b2_j1    | 13.8707     | 25.9263                | 0         | 1         | 1         |
| Btbd1_j5    | 0.000675289 | 0.874193               | 10.3382   | 0.431361  | 0.743572  |
| Hdgfrp3_j4  | 4.97675     | 4.82247                | 0         | 1         | 1         |
| Il16_j1     | 0           | 0.126491 1.79769e+308  |           | 1.10E-05  | 1         |
| Il16_j6     | 0           | 0.0672333 1.79769e+308 |           | 0.0184257 | 1         |
| Fah_j2      | 0.0882647   | 0.0829429              | 0         | 1         | 1         |
| Fah_j6      | 3.60779     | 5.6633                 | 0         | 1         | 1         |
| Folh1_j2    | 0.350599    | 0.135573               | 0         | 1         | 1         |
| BC048663_j2 | 0           | 0.223035 1.79769e+308  |           | 0.0538796 | 0.270496  |
| Myo7a_j2    | 1.10688     | 1.87228                | 0.758293  | 0.0005839 | 0.0092714 |
| Myo7a_j5    | 0.252576    | 0.34752                | 0.460378  | 0.195821  | 0.538405  |
| Slco2b1_j1  | 0.924184    | 1.38686                | 0.585574  | 0.034979  | 0.205583  |
| Slco2b1_j2  | 0.000533267 | 0.264482               | 8.95409   | 0.544637  | 0.811634  |
| Rnf169_j4   | 0.0171311   | 0.0996487              | 0         | 1         | 1         |
| Pold3_j5    | 0           | 0.255409               | 0         | 1         | 1         |
| Pold3_j4    | 0.579291    | 1.3267                 | 0         | 1         | 1         |
| XLOC_030593 | 0.133619    | 0.187467               | 0         | 1         | 1         |
| Relt_j1     | 1.42841     | 1.30982                | 0         | 1         | 1         |
| Arhgef17_j2 | 2.64059     | 2.68095                | 0.0218838 | 0.884536  | 0.963396  |
| Atg16l2_j9  | 0.210329    | 0.111713               | -0.912851 | 0.103906  | 0.399846  |
| Atg16l2_j8  | 0           | 0.0967758 1.79769e+308 |           | 0.0048404 | 1         |
| Atg16l2_j15 | 0.309022    | 0.668276               | 1.11273   | 0.0139693 | 0.109316  |
| Inpp1_j8    | 0           | 0.0923692              | 0         | 1         | 1         |
| Nup98_j6    | 0.00449617  | 0.607659               | 0         | 1         | 1         |
| Rhog_j1     | 14.3028     | 18.1094                | 0         | 1         | 1         |
| Trim68_j3   | 0           | 0.137581 1.79769e+308  |           | 0.0198238 | 1         |
| Olfr78      | 0           | 0.25745 1.79769e+308   |           | 0.0003432 | 0.005955  |
| Trim30a_j9  | 0.141307    | 0.217031               | 0.619071  | 0.45273   | 0.757765  |
| Trim30d_j2  | 0.0607523   | 0.0467982              | -0.376487 | 0.816009  | 1         |
| Fam160a2_j3 | 0           | 0.0852375 1.79769e+308 |           | 0.0002807 | 1         |
| Taf10_j1    | 0.252447    | 0.262244               | 0.0549343 | 0.893533  | 0.966325  |
| Dchs1_j3    | 0           | 0.0495018 1.79769e+308 |           | 0.0198557 | 1         |
| Cyb5r2_j5   | 0           | 0.070865 1.79769e+308  |           | 0.0888122 | 1         |
| Lmo1_j4     | 0           | 0.722927               | 0         | 1         | 1         |
| Stk33_j3    | 0           | 0.0603095              | 0         | 1         | 1         |
| Trim66_j1   | 0.0648018   | 0.0796548              | 0         | 1         | 1         |
| St5_j3      | 0.0682568   | 0.0530204              | 0         | 1         | 1         |
| Sbf2_j2     | 0.719111    | 1.28628                | 0         | 1         | 1         |
| Eif4g2_j1   | 0           | 0.105896               | 0         | 1         | 1         |
| Dkk3_j2     | 15.0744     | 14.3359                | 0         | 1         | 1         |
| Copb1_j1    | 8.12012     | 9.80286                | 0.2717    | 0.13038   | 0.449632  |
| Calca_j3    | 0           | 0.281103               | 0         | 1         | 1         |
| Sox6_j5     | 0           | 0.0833675 1.79769e+308 |           | 0.0862235 | 1         |
| Plekha7_j9  | 0           | 0.0840186 1.79769e+308 |           | 0.0074043 | 1         |

|                  |             |           |              |           |           |
|------------------|-------------|-----------|--------------|-----------|-----------|
| Rps13_j1         | 0.978439    | 1.32971   | 0.442563     | 0.12567   | 0.441571  |
| Pik3c2a_j5       | 0.121313    | 0.159476  | 0.394606     | 0.399792  | 0.72333   |
| Pik3c2a_j6       | 0.0605738   | 0.223871  | 1.8859       | 0.0002898 | 0.0051927 |
| 2310008H09Rik_j2 | 0.47646     | 0.344192  | 0            | 1         | 1         |
| Gpr139_j2        | 0.000195838 | 0.777458  | 0            | 1         | 1         |
| Usp31_j1         | 0.050044    | 0.0345428 | 0            | 1         | 1         |
| Ears2            | 1.10841     | 1.01234   | -0.130795    | 0.444761  | 0.752448  |
| Ndufab1          | 2.86459     | 3.54615   | 0            | 1         | 1         |
| Arhgap17_j2      | 0.0354462   | 0.0561444 | 0            | 1         | 1         |
| Nsmce1_j3        | 4.50274     | 6.25669   | 0.474598     | 0.0264282 | 0.170807  |
| Gtf3c1_j6        | 0.775546    | 0.436712  | 0            | 1         | 1         |
| Spns1_j1         | 8.46162     | 9.74487   | 0.203709     | 0.216941  | 0.563111  |
| Nfatc2ip_j3      | 0.187933    | 0.239027  | 0.346955     | 0.556123  | 0.818696  |
| Cln3_j6          | 0           | 0.210911  | 1.79769e+308 | 0.0095015 | 0.0824333 |
| Coro1a_j10       | 25.5157     | 23.8142   | -0.0995662   | 0.411416  | 0.730688  |
| Ppp4c_j1         | 7.59208     | 8.60605   | 0.180857     | 0.394098  | 0.719811  |
| Taok2_j6         | 0.268069    | 0.315247  | 0.233879     | 0.425116  | 0.740393  |
| Taok2_j7         | 1.80297     | 1.65596   | -0.122707    | 0.590695  | 0.836695  |
| BC099577_j2      | 0           | 0.143302  | 1.79769e+308 | 0.0014712 | 1         |
| Tbc1d10b_j2      | 0.0809043   | 0.554372  | 2.77657      | 0.0003618 | 0.0062193 |
| Sept1_j4         | 0.2777      | 0.431677  | 0.636426     | 0.294903  | 0.641532  |
| Sept1_j6         | 0.0446449   | 0.0579831 | 0.377137     | 0.865886  | 1         |
| Gm4532           | 0.687322    | 0.522254  | -0.396233    | 0.508333  | 0.790256  |
| Gm166_j3         | 0.416053    | 0.451904  | 0.119247     | 0.831846  | 0.945814  |
| Bcl7c_j1         | 0.300781    | 0.278182  | 0            | 1         | 1         |
| Zfp668_j5        | 0           | 0.525313  | 1.79769e+308 | 2.26E-11  | 2.58E-09  |
| Prss53           | 0.119322    | 0.084174  | -0.503413    | 0.322167  | 1         |
| Vkorc1_j1        | 10.5273     | 13.2688   | 0.333899     | 0.0717652 | 0.322189  |
| Prss36_j4        | 0.881237    | 0.588639  | -0.582147    | 0.283358  | 0.631755  |
| Prss36_j7        | 0.0627122   | 0.124513  | 0.989483     | 0.179357  | 1         |
| Prss36_j8        | 0.546529    | 0.46372   | -0.237044    | 0.627038  | 0.854469  |
| BC017158_j2      | 2.94252     | 3.6415    | 0            | 1         | 1         |
| Tial1_j2         | 0.527843    | 0.304367  | 0            | 1         | 1         |
| Fgfr2_j4         | 2.34E-05    | 0.303039  | 13.6578      | 0.981294  | 0.994152  |
| Fgfr2_j5         | 0.0292699   | 0.0791317 | 1.43484      | 0.243243  | 1         |
| Ate1_j5          | 0           | 0.0470527 | 0            | 1         | 1         |
| 2310057M21Rik_j3 | 6.78765     | 6.67196   | -0.0248019   | 0.882732  | 0.962684  |
| Ikzf5_j4         | 0.388532    | 0.403091  | 0            | 1         | 1         |
| Chst15_j1        | 3.38461     | 1.90556   | 0            | 1         | 1         |
| Chst15           | 2.34239     | 1.35758   | 0            | 1         | 1         |
| Mettl10_j1       | 0.0556192   | 0.0613729 | 0.14202      | 0.828717  | 1         |
| Ctbp2            | 0.0876099   | 0.151353  | 0            | 1         | 1         |
| D7Ert443e_j8     | 0.152033    | 0.0800912 | -0.924664    | 0.385175  | 0.713848  |
| D7Ert443e_j9     | 0.165033    | 0.256011  | 0.633453     | 0.411041  | 0.730555  |
| Fam196a_j2       | 0           | 0.124024  | 0            | 1         | 1         |
| Ebf3_j4          | 2.20637     | 2.21684   | 0            | 1         | 1         |
| Ebf3_j5          | 0.740902    | 0.623035  | 0            | 1         | 1         |

|                  |             |           |              |           |           |
|------------------|-------------|-----------|--------------|-----------|-----------|
| Ebf3_j7          | 0           | 0.408888  | 0            | 1         | 1         |
| 9430038I01Rik_j4 | 0.776644    | 0.75824   | -0.0345979   | 0.950169  | 0.985614  |
| 9430038I01Rik_j5 | 0.157988    | 0.190745  | 0.271832     | 0.758964  | 0.917041  |
| Tcerg1l_j3       | 0.548793    | 0.963838  | 0.812528     | 0.0813614 | 0.347413  |
| Bnip3_j2         | 0.085458    | 0.139479  | 0            | 1         | 1         |
| Stk32c_j3        | 0.145829    | 0.361846  | 0            | 1         | 1         |
| Adam8_j6         | 2.50746     | 12.8555   | 2.35809      | 0         | 0         |
| Adam8_j7         | 1.37507     | 1.60102   | 0.219485     | 0.154795  | 0.487987  |
| Sprn_j1          | 3.28588     | 3.3592    | 0.031838     | 0.850177  | 0.952363  |
| Sprn_j2          | 0.964999    | 1.40687   | 0.543888     | 0.102943  | 0.397582  |
| Zfp941_j1        | 0.579792    | 0.711866  | 0.29607      | 0.334683  | 0.675451  |
| Sirt3_j1         | 5.2972      | 5.01848   | 0            | 1         | 1         |
| Sigirr_j2        | 0.0422943   | 0.0987284 | 1.223        | 0.343058  | 1         |
| Sigirr_j8        | 0           | 0.0608276 | 1.79769e+308 | 0.118554  | 1         |
| B230206H07Rik_j4 | 0.339425    | 0.719918  | 1.08474      | 0.006672  | 0.0634623 |
| B230206H07Rik_j5 | 0.174347    | 0.577805  | 1.72862      | 1.68E-05  | 0.0004808 |
| Cend1_j1         | 25.9571     | 39.7037   | 0            | 1         | 1         |
| Slc25a22_j6      | 7.9342      | 7.97508   | 0            | 1         | 1         |
| Slc25a22_j7      | 0           | 0.0691201 | 0            | 1         | 1         |
| Lrdd_j5          | 0.568843    | 0.490159  | -0.214779    | 0.534017  | 0.805363  |
| AK149132_j1      | 2.31679     | 2.43463   | 0            | 1         | 1         |
| Chid1_j1         | 3.18121     | 2.97678   | 0            | 1         | 1         |
| RP23-118G3.2_j1  | 0.612978    | 0.526841  | -0.218468    | 0.397165  | 0.721578  |
| 6330512M04Rik_j3 | 0.43438     | 0.295585  | -0.555384    | 0.62006   | 0.850928  |
| 6330512M04Rik_j2 | 0.362377    | 0.218736  | -0.728299    | 0.431488  | 0.74365   |
| Th_j2            | 5.06627     | 7.74086   | 0            | 1         | 1         |
| Nap1l4_j6        | 0           | 3.63026   | 0            | 1         | 1         |
| Cars_j6          | 2.8996      | 3.32367   | 0            | 1         | 1         |
| Mrgpre_j3        | 3.46751     | 4.61252   | 0            | 1         | 1         |
| Nadsyn1_j8       | 0           | 0.108014  | 1.79769e+308 | 0.027076  | 1         |
| Ppfi1_j8         | 0.420532    | 0.530701  | 0            | 1         | 1         |
| Ppfi1_j9         | 0.5557      | 1.0968    | 0            | 1         | 1         |
| Tpcn2_j5         | 0.174212    | 0.459733  | 1.39996      | 0.0213644 | 0.147376  |
| Myadm_j2         | 24.1078     | 21.8288   | 0            | 1         | 1         |
| Cnot3_j1         | 1.38543     | 0.920784  | -0.589394    | 0.0343037 | 0.202972  |
| Cnot3_j6         | 1.76932     | 1.80657   | 0.0300527    | 0.902072  | 0.968734  |
| Ttyh1            | 18.9553     | 16.7401   | 0            | 1         | 1         |
| Leng8_j8         | 5.86734     | 5.78868   | 0            | 1         | 1         |
| Lilra5_j2        | 0           | 0.0896974 | 1.79769e+308 | 0.0622329 | 1         |
| Eps8l1_j4        | 0.391149    | 0.313536  | 0            | 1         | 1         |
| Suv420h2_j8      | 0.489184    | 0.593712  | 0.279386     | 0.533602  | 0.805224  |
| Rpl28_j3         | 2.42521     | 2.72096   | 0.166009     | 0.545535  | 0.812425  |
| Rpl28_j2         | 0.327356    | 0.487501  | 0.574544     | 0.35294   | 0.689667  |
| XLOC_029467      | 0.019163    | 0.136496  | 2.83246      | 0.136305  | 1         |
| Nat14_j3         | 1.61303     | 2.49885   | 0            | 1         | 1         |
| A430110N23Rik_j2 | 0.0626381   | 0.160832  | 1.36044      | 0.162897  | 0.498174  |
| A430110N23Rik_j4 | 0.000162779 | 0.213363  | 10.3562      | 0.911452  | 0.972265  |



|                  |             |           |              |           |           |
|------------------|-------------|-----------|--------------|-----------|-----------|
| A430110N23Rik_j7 | 0           | 0.495973  | 1.79769e+308 | 0.000354  | 0.0061103 |
| Zfp524_j2        | 3.63457     | 3.57485   |              | 0         | 1         |
| Zfp580_j1        | 0.0790482   | 0.0634198 |              | 0         | 1         |
| Ccdc106_j1       | 0.211957    | 0.219599  |              | 0         | 1         |
| Ccdc106          | 0.751047    | 0.618382  |              | 0         | 1         |
| Epn1_j3          | 0.288703    | 0.157923  |              | 0         | 1         |
| Epn1_j2          | 3.8096      | 5.94163   |              | 0         | 1         |
| Epn1_j11         | 0.0736983   | 0.285262  |              | 0         | 1         |
| Zfp78_j6         | 0.200595    | 0.353928  | 0.819168     | 0.32698   | 0.66996   |
| Zfp418_j1        | 0.152382    | 0.252657  | 0            | 1         | 1         |
| Zfp324_j2        | 0           | 0.184712  | 0            | 1         | 1         |
| Zfp324_j1        | 0           | 0.315201  | 0            | 1         | 1         |
| Pla2g4c_j2       | 0.000239366 | 0.141511  | 9.20748      | 0.876628  | 1         |
| Napa_j2          | 0.407124    | 0.0897745 | 0            | 1         | 1         |
| Kptn_j1          | 37.2107     | 44.3949   | 0            | 1         | 1         |
| Slc8a2_j1        | 0.837947    | 0.951927  | 0            | 1         | 1         |
| Tmem160_j2       | 25.658      | 32.1694   | 0.32628      | 0.0472086 | 0.249396  |
| XLOC_029499      | 0.0545726   | 0.0473278 | -0.20549     | 0.916115  | 1         |
| Slc1a5_j2        | 5.00582     | 5.7958    | 0            | 1         | 1         |
| XLOC_029501      | 0           | 0.0837475 | 0            | 1         | 1         |
| Ptgir_j1         | 19.6844     | 18.6324   | 0            | 1         | 1         |
| XLOC_029514      | 0.0753796   | 0.13101   | 0.797428     | 0.780095  | 1         |
| Mill2_j4         | 0.0613314   | 0.0441564 | 0            | 1         | 1         |
| Sympk_j3         | 4.61078     | 7.58002   | 0            | 1         | 1         |
| Dmwd_j3          | 17.5992     | 19.019    | 0            | 1         | 1         |
| Dmpk_j4          | 0           | 0.140304  | 0            | 1         | 1         |
| Dmpk_j3          | 1.23608     | 1.31635   | 0            | 1         | 1         |
| Dmpk_j11         | 0.357702    | 0.651419  | 0            | 1         | 1         |
| Eml2_j2          | 18.9299     | 18.2002   | -0.0567132   | 0.599321  | 0.841178  |
| Ppp1r13l_j4      | 0.616284    | 0.666568  | 0.113157     | 0.722742  | 0.901273  |
| Ppp1r13l_j3      | 1.2665      | 1.50637   | 0.250224     | 0.234833  | 0.582023  |
| XLOC_029542      | 0.391541    | 0.591726  | 0            | 1         | 1         |
| AK043814_j4      | 0.410994    | 0.419733  | 0            | 1         | 1         |
| AK043814_j5      | 1.42624     | 1.63218   | 0            | 1         | 1         |
| Zfp112           | 0.243442    | 0.320757  | 0            | 1         | 1         |
| Zfp112_j1        | 0           | 0.0574356 | 0            | 1         | 1         |
| Zfp235_j4        | 0.922903    | 1.24754   | 0            | 1         | 1         |
| Ceacam10_j2      | 0.133846    | 0.19854   | 0.568853     | 0.702174  | 0.890793  |
| Zfp574_j2        | 4.76252     | 4.8765    | 0.0341204    | 0.811704  | 0.938243  |
| Zfp526_j2        | 0.394426    | 0.686863  | 0            | 1         | 1         |
| Cic_j7           | 0           | 0.0981798 | 0            | 1         | 1         |
| Megf8_j4         | 0.0522486   | 0.0450862 | -0.212706    | 0.777508  | 1         |
| Megf8_j8         | 7.1284      | 7.74016   | 0.118784     | 0.370965  | 0.703951  |
| Prx_j1           | 1.84401     | 2.21186   | 0            | 1         | 1         |
| Prx_j2           | 0           | 2.23683   | 0            | 1         | 1         |
| Hipk4_j1         | 3.15676     | 4.58754   | 0            | 1         | 1         |
| Akt2_j3          | 0.280829    | 0.476354  | 0.762343     | 0.391303  | 0.717886  |

|                  |           |           |              |            |           |           |
|------------------|-----------|-----------|--------------|------------|-----------|-----------|
| Akt2_j11         | 0         | 0.168387  | 1.79769e+308 | 0.0014048  | 0.0187498 |           |
| Zfp60_j1         | 0         | 0.15265   | 1.79769e+308 | 0.000569   | 1         |           |
| XLOC_029591      | 1.2735    | 1.51002   |              | 0.245766   | 0.366307  | 0.700074  |
| 4933426l21Rik_j1 | 0.183331  | 0.718721  |              | 1.97098    | 0.109691  | 0.412083  |
| Paf1_j1          | 4.97316   | 5.75668   |              | 0.211074   | 0.168989  | 0.505754  |
| Paf1_j2          | 3.96511   | 5.51449   |              | 0.475866   | 0.0010115 | 0.0144422 |
| Sirt2_j1         | 0         | 0.241944  |              | 0          | 1         | 1         |
| Lgals4_j2        | 0.749722  | 0.873332  |              | 0.220174   | 0.38773   | 0.715426  |
| Map4k1_j4        | 0         | 0.105456  | 1.79769e+308 |            | 0.0703716 | 1         |
| Rasgrp4_j1       | 0         | 0.186385  | 1.79769e+308 |            | 0.0372851 | 0.214026  |
| XLOC_029613      | 0         | 0.182669  | 1.79769e+308 |            | 0.142607  | 0.469297  |
| Yif1b            | 4.50048   | 5.76676   |              | 0.357684   | 0.179886  | 0.51951   |
| Dpf1_j1          | 0.337282  | 0.397109  |              | 0.235578   | 0.648498  | 0.864697  |
| mKIAA0961        | 0.636634  | 0.751058  |              | 0.238461   | 0.544012  | 0.811174  |
| Zfp30            | 0.413652  | 0.289216  |              | -0.516267  | 0.25237   | 0.600387  |
| AK138949_j2      | 19.4798   | 21.3092   |              | 0.129502   | 0.309756  | 0.654331  |
| Zfp382_j5        | 0         | 0.143476  |              | 0          | 1         | 1         |
| Alkbh6_j5        | 2.45207   | 2.5412    |              | 0.0515075  | 0.885634  | 0.963692  |
| AI428936_j11     | 1.68174   | 1.36791   |              | -0.297979  | 0.410383  | 0.730298  |
| Nfkbid_j8        | 0.105737  | 0.165304  |              | 0.644643   | 0.430878  | 0.743374  |
| AK131900_j1      | 0.0432072 | 0.232058  |              | 2.42514    | 0.143617  | 0.470722  |
| Lgi4             | 7.79992   | 8.45755   |              | 0          | 1         | 1         |
| Lgi4_j1          | 5.05439   | 5.86324   |              | 0          | 1         | 1         |
| XLOC_029644      | 0.085261  | 0.0871819 |              | 0          | 1         | 1         |
| XLOC_029663      | 0.0359118 | 0.0882997 |              | 1.29795    | 0.378738  | 1         |
| XLOC_029665      | 0.189602  | 0.338606  |              | 0.836633   | 0.0305409 | 0.187939  |
| Zfp788_j6        | 0.830301  | 0.837811  |              | 0          | 1         | 1         |
| Zfp658_j1        | 0         | 0.0599628 | 1.79769e+308 |            | 0.0312992 | 1         |
| Zfp658_j3        | 0         | 0.331911  | 1.79769e+308 |            | 1.02E-05  | 0.0003142 |
| Klk10_j1         | 0.0135075 | 0.0582295 |              | 2.10799    | 0.384821  | 1         |
| Klk5_j7          | 0         | 0.193769  | 1.79769e+308 |            | 0.0112197 | 0.0933773 |
| Klk5             | 0.395592  | 0.0289434 |              | -3.77271   | 0.0376067 | 0.215137  |
| Shank1_j10       | 1.29057   | 0.834127  |              | -0.629672  | 0.0019917 | 0.024885  |
| Josd2_j5         | 1.07438   | 1.9277    |              | 0.843371   | 0.0686061 | 0.313818  |
| Napsa_j3         | 0.0263255 | 0.0523251 |              | 0.991039   | 0.639678  | 1         |
| Napsa_j7         | 0.0454339 | 0.0997045 |              | 1.13389    | 0.317112  | 1         |
| Kcnc3_j2         | 2.4858    | 0.918293  |              | -1.43668   | 1.94E-08  | 1.29E-06  |
| Tsks_j1          | 0.153645  | 0.12304   |              | -0.320471  | 0.689249  | 0.884784  |
| AK042966         | 0.62488   | 0.349157  |              | 0          | 1         | 1         |
| XLOC_029719      | 0.0208961 | 0.111031  |              | 2.40966    | 0.210722  | 1         |
| Plekha4_j3       | 9.11113   | 10.9937   |              | 0          | 1         | 1         |
| Plekha4_j6       | 1.26255   | 1.1739    |              | 0          | 1         | 1         |
| Hsd17b14_j2      | 0.0469821 | 0.143744  |              | 1.61332    | 0.12712   | 1         |
| XLOC_029724      | 0.218547  | 0.208814  |              | -0.0657291 | 0.926979  | 0.97741   |
| Rasip1_j7        | 1.12321   | 1.42905   |              | 0.347429   | 0.460888  | 0.762257  |
| Ntn5             | 0.208037  | 0.335149  |              | 0.687964   | 0.341095  | 0.681029  |
| Car11_j6         | 18.0249   | 22.5688   |              | 0          | 1         | 1         |

|             |             |           |              |           |           |
|-------------|-------------|-----------|--------------|-----------|-----------|
| Lmtk3_j8    | 0.0660859   | 0         | 0            | 1         | 1         |
| Tmem143     | 2.39077     | 1.81645   | 0            | 1         | 1         |
| Kcnc1_j1    | 2.97671     | 2.42979   | 0            | 1         | 1         |
| Ldha_j3     | 3.87301     | 18.6092   | 0            | 1         | 1         |
| Nav2_j6     | 0.441039    | 0.342234  | -0.365924    | 0.224976  | 0.572175  |
| Nav2_j7     | 0.0555886   | 0.25676   | 2.20756      | 1.03E-05  | 0.0003175 |
| Htatip2_j1  | 14.4761     | 17.1716   | 0            | 1         | 1         |
| Prmt3_j1    | 5.5907      | 4.46831   | -0.323301    | 0.10108   | 0.39362   |
| Prmt3_j4    | 1.2997      | 0.615696  | -1.07789     | 0.152744  | 0.484689  |
| Luzp2_j3    | 0           | 1.32219   | 0            | 1         | 1         |
| Atp10a_j3   | 0.0345689   | 0.210736  | 2.60789      | 0.002467  | 0.0295306 |
| Ube3a_j1    | 1.23594     | 1.21448   | -0.0252803   | 0.899097  | 0.96767   |
| XLOC_029771 | 1.13879     | 0.17202   | -2.72685     | 0.0071502 | 0.0669529 |
| XLOC_029771 | 0.100957    | 0.0361077 | -1.48336     | 0.360173  | 1         |
| Mcee_j2     | 8.3255      | 9.3393    | 0.165778     | 0.421986  | 0.738161  |
| Apba2_j5    | 0.135855    | 0.0582245 | 0            | 1         | 1         |
| Apba2_j11   | 0.39045     | 4.42539   | 0            | 1         | 1         |
| Chsy1_j3    | 0.000173966 | 0.359939  | 0            | 1         | 1         |
| Chsy1_j4    | 1.28227     | 1.13094   | 0            | 1         | 1         |
| Adamts17_j4 | 0.234579    | 0.189767  | -0.305843    | 0.481766  | 0.775249  |
| Fam169b_j1  | 0.0709831   | 0.142467  | 1.00508      | 0.244493  | 1         |
| Fam169b_j3  | 0           | 0.18269   | 1.79769e+308 | 0.0035981 | 0.0398023 |
| XLOC_029791 | 0.0401997   | 0.254648  | 2.66325      | 0.208048  | 0.55225   |
| BC070425_j2 | 0           | 0.104961  | 1.79769e+308 | 0.0231712 | 1         |
| Zfp710_j3   | 0           | 0.115926  | 1.79769e+308 | 0.0252936 | 1         |
| Sema4b_j1   | 12.3774     | 12.8632   | 0.0555399    | 0.59373   | 0.838143  |
| Ttll13_j1   | 0.0391416   | 0.126676  | 0            | 1         | 1         |
| Zfp592_j1   | 0           | 0.098877  | 0            | 1         | 1         |
| Whamm_j2    | 0.891432    | 1.48331   | 0.734627     | 0.0097192 | 0.0838932 |
| Sh3gl3_j1   | 0           | 0.372332  | 1.79769e+308 | 0.0023149 | 0.0280248 |
| Adamts13_j5 | 0.220046    | 0.250016  | 0.184213     | 0.663195  | 0.872414  |
| XLOC_029837 | 0.0643061   | 0.146315  | 1.18605      | 0.221924  | 1         |
| Mex3b_j1    | 1.38383     | 1.73977   | 0.330233     | 0.171074  | 0.507955  |
| Ctsc_j1     | 0.1341      | 0.789038  | 2.55679      | 6.34E-06  | 0.0002087 |
| Rab38_j1    | 0.712611    | 0.782402  | 0.134795     | 0.787363  | 0.929083  |
| Picalm_j3   | 2.20998     | 3.01631   | 0.448751     | 0.0558135 | 0.276139  |
| Prpcp_j1    | 1.24702     | 1.53036   | 0            | 1         | 1         |
| Odz4_j3     | 0.216492    | 0.348841  | 0.688256     | 0.0104137 | 0.0881213 |
| Odz4_j1     | 0.0436689   | 0.0610305 | 0.482926     | 0.406879  | 1         |
| Nars2_j2    | 0.253446    | 0.282102  | 0.154538     | 0.828466  | 0.944579  |
| Lrrc32      | 0.400902    | 0.304447  | -0.397058    | 0.263834  | 0.612653  |
| Prkrir_j2   | 0.114016    | 0.34709   | 0            | 1         | 1         |
| Arrb1_j5    | 5.46728     | 7.16997   | 0            | 1         | 1         |
| Fam168a_j1  | 24.5101     | 22.5573   | -0.11978     | 0.171568  | 0.508581  |
| Arap1       | 0.305243    | 0.499415  | 0.710281     | 0.0394712 | 0.222024  |
| Arap1_j3    | 0.620194    | 0.947637  | 0.611614     | 0.0099963 | 0.0855854 |
| Pde2a       | 2.10879     | 1.79417   | -0.233093    | 0.239548  | 0.586945  |

|                  |            |           |              |           |           |
|------------------|------------|-----------|--------------|-----------|-----------|
| Pde2a_j2         | 1.48781    | 1.48058   | -0.00702789  | 0.975406  | 0.992893  |
| 3200002M19Rik_j5 | 0.160482   | 0.0565633 | 0            | 1         | 1         |
| 3200002M19Rik_j8 | 1.28464    | 0.920005  | 0            | 1         | 1         |
| Numa1_j7         | 0          | 0.148741  | 0            | 1         | 1         |
| Pgap2_j3         | 0.361416   | 0.572414  | 0            | 1         | 1         |
| Stim1_j1         | 0.852547   | 0.103404  | 0            | 1         | 1         |
| Trim6_j1         | 0          | 0.0988873 | 1.79769e+308 | 0.0118368 | 1         |
| Trim6_j8         | 0.0819689  | 0.261116  | 1.67154      | 0.0354148 | 0.207369  |
| XLOC_029917      | 0.351165   | 0.459872  | 0.389084     | 0.461078  | 0.762373  |
| AK136817_j1      | 3.48592    | 3.50697   | 0.00868421   | 0.952197  | 0.986165  |
| Syt9_j1          | 0          | 0.187262  | 0            | 1         | 1         |
| Ppfibp2_j11      | 0          | 0.637976  | 1.79769e+308 | 1.23E-05  | 0.0003702 |
| D930014E17Rik_j2 | 0.272414   | 0.187696  | -0.537403    | 0.651247  | 0.866096  |
| Usp47_j4         | 14.2047    | 16.9982   | 0.259007     | 0.0287402 | 0.180466  |
| Mical2_j7        | 1.50769    | 1.89214   | 0.327683     | 0.0751799 | 0.33096   |
| Tead1_j3         | 0.697059   | 0.232204  | -1.58589     | 8.28E-07  | 3.52E-05  |
| Arntl_j4         | 0.354212   | 0.163283  | -1.11724     | 0.0861294 | 0.358595  |
| XLOC_029959      | 0.0139495  | 0.0679493 | 2.28424      | 0.461725  | 1         |
| AK045786_j1      | 0          | 0.470003  | 1.79769e+308 | 0.0084781 | 0.0757755 |
| AK045786_j5      | 0.170259   | 0.390449  | 1.1974       | 0.323065  | 0.666102  |
| AK045786_j6      | 0          | 0.396087  | 1.79769e+308 | 0.0678538 | 0.311782  |
| Tmc5_j2          | 0.137742   | 0.242194  | 0.81419      | 0.128278  | 0.446393  |
| Tmc5_j5          | 0.110952   | 0.32364   | 1.54445      | 0.176032  | 0.514631  |
| 9030624J02Rik_j4 | 1.02872    | 0.384374  | 0            | 1         | 1         |
| Tmem159_j1       | 1.07526    | 3.74005   | 1.79837      | 5.16E-05  | 0.0012254 |
| Vwa3a_j3         | 0          | 0.0754566 | 1.79769e+308 | 0.0836993 | 1         |
| Vwa3a_j5         | 0.0808895  | 0.0607411 | -0.413281    | 0.751058  | 1         |
| Polr3e_j3        | 0.0489793  | 0.0392307 | 0            | 1         | 1         |
| Polr3e_j5        | 0.401186   | 0.914798  | 0            | 1         | 1         |
| Hs3st2_j3        | 3.20471    | 1.15794   | 0            | 1         | 1         |
| 2010110P09Rik_j2 | 4.79038    | 6.27606   | 0            | 1         | 1         |
| Rbbp6_j5         | 0.149564   | 0.205909  | 0            | 1         | 1         |
| Slc5a11_j6       | 0.0902241  | 0.213702  | 0            | 1         | 1         |
| Slc5a11_j9       | 0.0802513  | 0.0677937 | 0            | 1         | 1         |
| Slc5a11_j15      | 0.143949   | 0.144365  | 0            | 1         | 1         |
| XLOC_029992      | 0          | 0.10882   | 1.79769e+308 | 0.101033  | 1         |
| XLOC_029992      | 0.0787199  | 0.252614  | 1.68213      | 0.130627  | 0.450005  |
| Hs3st4_j1        | 2.25534    | 1.05409   | -1.09734     | 5.65E-05  | 0.0013229 |
| Jmjd5_j1         | 0.00866634 | 0.485051  | 0            | 1         | 1         |
| Il21r_j4         | 0          | 0.0584028 | 1.79769e+308 | 0.113087  | 1         |
| D430042O09Rik_j3 | 0.0380461  | 0.200005  | 0            | 1         | 1         |
| Rabep2_j4        | 2.60862    | 3.28782   | 0.333843     | 0.174031  | 0.512068  |
| Ccdc101          | 0.184261   | 0.222944  | 0.274933     | 0.741106  | 0.909246  |
| Ypel3            | 5.82156    | 7.881     | 0.436972     | 0.172008  | 0.509127  |
| Sez6l2_j3        | 0.00147946 | 0.19837   | 0            | 1         | 1         |
| Sez6l2_j6        | 0          | 0.217603  | 0            | 1         | 1         |
| Sez6l2_j7        | 8.24319    | 7.39517   | 0            | 1         | 1         |

|              |            |           |              |           |           |
|--------------|------------|-----------|--------------|-----------|-----------|
| XLOC_030012  | 0          | 0.411741  | 1.79769e+308 | 3.73E-05  | 0.0009295 |
| AK045290_j1  | 1.98169    | 2.01816   | 0.0263093    | 0.850896  | 0.952632  |
| Fbrs_j4      | 1.16105    | 1.01122   | -0.199326    | 0.527802  | 0.801757  |
| Rnf40_j4     | 0.707438   | 0.919964  | 0.378973     | 0.171551  | 0.508581  |
| Ctf1_j2      | 0.106347   | 0.186392  | 0            | 1         | 1         |
| Fbxl19_j4    | 0.489605   | 0.476422  | 0            | 1         | 1         |
| Fbxl19_j5    | 1.09356    | 1.50092   | 0            | 1         | 1         |
| Fbxl19_j8    | 1.01502    | 0.493647  | 0            | 1         | 1         |
| Setd1a_j7    | 1.38405    | 0.822029  | 0            | 1         | 1         |
| XLOC_030025  | 0.0667621  | 0.240363  | 1.84812      | 0.144527  | 0.471765  |
| Fus_j4       | 2.24346    | 1.32904   | 0            | 1         | 1         |
| Ilgax_j1     | 0.0326742  | 0.127156  | 1.96038      | 0.185309  | 1         |
| Ilgad_j2     | 0.0591899  | 0.19653   | 1.73133      | 0.230043  | 0.577078  |
| Inpp5f_j1    | 29.0718    | 31.2209   | 0.102895     | 0.280722  | 0.629223  |
| Sec23ip_j1   | 1.22197    | 0.424166  | -1.52651     | 5.55E-05  | 0.0013034 |
| Ppapdc1a_j2  | 0.144193   | 0.16866   | 0.22612      | 0.835117  | 0.946964  |
| Plekha1_j2   | 4.08954    | 3.7866    | -0.111034    | 0.640589  | 0.861179  |
| Plekha1      | 8.7089     | 8.97634   | 0.0436357    | 0.79883   | 0.933125  |
| XLOC_030053  | 0.0995037  | 0.189586  | 0.930031     | 0.0946847 | 0.379369  |
| AK086971_j1  | 0.0685686  | 0.128879  | 0.910396     | 0.496226  | 1         |
| Lhpp_j4      | 0.583829   | 1.22423   | 1.06826      | 0.0307635 | 0.188895  |
| Lhpp_j6      | 0.739707   | 0.965791  | 0.384758     | 0.484947  | 0.776802  |
| Fam175b_j1   | 2.76617    | 3.72409   | 0.428998     | 0.0367611 | 0.212054  |
| Zranb1_j2    | 2.6547     | 2.83662   | 0            | 1         | 1         |
| Fank1_j2     | 0.03989    | 0.0807723 | 0            | 1         | 1         |
| Fank1_j1     | 0.669916   | 0.412459  | 0            | 1         | 1         |
| XLOC_030060  | 0.0404173  | 0.0626775 | 0.632975     | 0.71137   | 1         |
| Dock1_j2     | 0.833152   | 0.893028  | 0            | 1         | 1         |
| XLOC_030062  | 0.236699   | 0.249147  | 0.073947     | 0.927779  | 0.977629  |
| Ptpre        | 0.170482   | 0.435407  | 0            | 1         | 1         |
| Ptpre_j3     | 0.781571   | 1.07812   | 0            | 1         | 1         |
| Glrx3_j10    | 31.4687    | 39.2717   | 0.319574     | 0.0809298 | 0.346358  |
| XLOC_030066  | 2.16102    | 2.36748   | 0            | 1         | 1         |
| XLOC_030069  | 0          | 0.0598847 | 1.79769e+308 | 0.126335  | 1         |
| Ppp2r2d_j2   | 0.120419   | 0.110185  | 0            | 1         | 1         |
| Jakmip3_j8   | 0          | 0.43333   | 1.79769e+308 | 7.28E-05  | 0.0016377 |
| Jakmip3_j10  | 0.0212792  | 0.0868423 | 2.02896      | 0.224038  | 1         |
| Dpysl4_j2    | 1.59472    | 1.30611   | -0.288027    | 0.212717  | 0.557725  |
| Dpysl4_j6    | 1.0639     | 1.82581   | 0.779172     | 0.015241  | 0.116243  |
| Kndc1_j2     | 1.18526    | 0.842701  | 0            | 1         | 1         |
| Paox_j7      | 0.0175604  | 0.207548  | 3.56305      | 0.256952  | 0.605736  |
| Paox_j8      | 0.00585034 | 0.482029  | 6.36446      | 0.0041775 | 0.0442627 |
| B4galnt4_j9  | 0.06519    | 0.271824  | 2.05995      | 0.00304   | 0.0348063 |
| B4galnt4_j10 | 0.525598   | 1.37687   | 1.38936      | 6.03E-06  | 0.0001995 |
| Pkp3         | 0.0885111  | 0.218188  | 1.30164      | 0.0481703 | 0.252582  |
| Phrf1_j8     | 0.785682   | 0.375029  | 0            | 1         | 1         |
| Eps8l2_j1    | 1.10187    | 0.911685  | -0.273353    | 0.218554  | 0.564944  |

|                  |           |                        |            |           |           |
|------------------|-----------|------------------------|------------|-----------|-----------|
| Cd151_j1         | 0.651223  | 0.671463               | 0          | 1         | 1         |
| Cd151_j2         | 2.12153   | 0.952043               | 0          | 1         | 1         |
| Cd151_j11        | 2.61064   | 2.75362                | 0          | 1         | 1         |
| Ap2a2_j1         | 0.197558  | 0.249612               | 0          | 1         | 1         |
| Lsp1             | 0         | 0.0693616 1.79769e+308 |            | 0.106751  | 1         |
| Lsp1_j5          | 0         | 0.0630814 1.79769e+308 |            | 0.102123  | 1         |
| Mrpl23_j3        | 0.130612  | 0.0994432              | -0.393345  | 0.750391  | 1         |
| Cd81_j3          | 41.4223   | 46.9974                | 0          | 1         | 1         |
| Kcnq1_j5         | 0.0431973 | 0.0818075              | 0.921292   | 0.493752  | 1         |
| Kcnq1_j8         | 0.103927  | 0.104124               | 0.00273053 | 0.997169  | 1         |
| Kcnq1_j9         | 0.129868  | 0.132328               | 0.0270762  | 0.981075  | 1         |
| Dhcr7_j3         | 0.976084  | 1.01179                | 0.0518315  | 0.900247  | 0.968284  |
| Dhcr7_j7         | 0         | 0.334094 1.79769e+308  |            | 0.0158078 | 0.11926   |
| Shank2_j6        | 0.017582  | 0.141649               | 3.01015    | 0.000298  | 1         |
| Mrgprf_j1        | 0.250255  | 0.150279               | -0.735761  | 0.386607  | 0.714571  |
| Nlrp12_j1        | 0.0543576 | 0.122571               | 1.17307    | 0.394458  | 1         |
| Tmc4_j7          | 0.321844  | 0.387629               | 0          | 1         | 1         |
| Mboat7_j4        | 0         | 1.19048                | 0          | 1         | 1         |
| Lilrb3_j7        | 0         | 0.130621 1.79769e+308  |            | 0.082512  | 1         |
| Lilrb3_j11       | 0         | 0.160725 1.79769e+308  |            | 0.0380885 | 0.2169    |
| Rdh13_j6         | 0.700409  | 0.828423               | 0          | 1         | 1         |
| Tnnt1_j2         | 0         | 0.0668405 1.79769e+308 |            | 0.0899645 | 1         |
| 6030429G01Rik_j4 | 0         | 0.0771779 1.79769e+308 |            | 0.0224447 | 1         |
| Ptprh_j1         | 0.078093  | 0.169107               | 1.11467    | 0.311956  | 0.656418  |
| Ppp6r1_j3        | 4.45559   | 4.34792                | 0          | 1         | 1         |
| Zfp787_j2        | 0         | 0.529695 1.79769e+308  |            | 0.0003178 | 0.0056087 |
| Peg3_j2          | 7.15943   | 12.6534                | 0          | 1         | 1         |
| Zscan18_j2       | 0         | 0.189075 1.79769e+308  |            | 0.000944  | 0.0136487 |
| Ube2m_j9         | 24.2493   | 26.8101                | 0          | 1         | 1         |
| Mzf1_j4          | 0.058216  | 0.0785588              | 0          | 1         | 1         |
| 6330408A02Rik_j1 | 0.194905  | 1.76815                | 0          | 1         | 1         |
| Sepw1_j3         | 3.9867    | 3.77451                | -0.0789051 | 0.817973  | 0.940936  |
| Gltscr1_j4       | 0.0413968 | 0.233899               | 0          | 1         | 1         |
| Dhx34_j4         | 2.01789   | 2.14539                | 0          | 1         | 1         |
| Ccdc9_j1         | 1.57246   | 1.55871                | -0.0126729 | 0.951681  | 0.98604   |
| Ccdc9_j5         | 0.508338  | 0.302716               | -0.747822  | 0.0724714 | 0.323898  |
| Ccdc9_j9         | 1.23831   | 1.01125                | -0.292226  | 0.34042   | 0.680518  |
| Ccdc61_j5        | 0.0234641 | 0.150171               | 2.67808    | 0.0970648 | 1         |
| Qpctl_j4         | 0         | 0.344903               | 0          | 1         | 1         |
| Vasp             | 22.2831   | 21.7865                | 0          | 1         | 1         |
| Klc3_j1          | 1.37103   | 1.66195                | 0.277615   | 0.428313  | 0.742274  |
| Mark4_j6         | 0.126412  | 0.183454               | 0          | 1         | 1         |
| Clasrp_j1        | 0.25621   | 0 -1.79769e+308        |            | 4.00E-05  | 0.0009876 |
| Relb_j1          | 7.50E-05  | 0.937234               | 0          | 1         | 1         |
| Relb_j2          | 0.179015  | 0.166795               | 0          | 1         | 1         |
| Relb             | 1.85453   | 1.76516                | 0          | 1         | 1         |
| Clptm1_j1        | 11.8502   | 15.2859                | 0.367296   | 0.0493974 | 0.256438  |

|             |           |           |              |           |           |
|-------------|-----------|-----------|--------------|-----------|-----------|
| Tomm40      | 3.82716   | 3.14862   | 0            | 1         | 1         |
| Bcam_j5     | 17.376    | 50.5949   | 0            | 1         | 1         |
| Bcl3_j4     | 0.0804726 | 0.0893333 | 0            | 1         | 1         |
| Pvr_j1      | 1.96565   | 3.87084   | 0.977636     | 1.70E-06  | 6.56E-05  |
| XLOC_030225 | 0.139429  | 0.309237  | 0            | 1         | 1         |
| XLOC_030225 | 0.120362  | 0.223299  | 0            | 1         | 1         |
| XLOC_030225 | 0.0562908 | 0.155718  | 0            | 1         | 1         |
| XLOC_030225 | 0.0442948 | 0.111516  | 0            | 1         | 1         |
| Zfp111_j3   | 0.311193  | 0.425473  | 0.451259     | 0.205248  | 0.549641  |
| Zfp61_j2    | 0.372318  | 0.327775  | -0.18383     | 0.623307  | 0.852781  |
| Pou2f2_j4   | 0.0485517 | 0.0401577 | -0.273845    | 0.827383  | 1         |
| Pou2f2_j6   | 0         | 0.107342  | 1.79769e+308 | 0.0076735 | 1         |
| Pou2f2_j5   | 0.219288  | 0.220287  | 0.00655613   | 0.988947  | 0.996607  |
| Ceacam1     | 0.173501  | 0.327779  | 0            | 1         | 1         |
| Hnrnpul1_j1 | 0.0587633 | 0.501883  | 0            | 1         | 1         |
| Axl_j1      | 0         | 0.209054  | 0            | 1         | 1         |
| Egln2_j2    | 0.115194  | 0.161042  | 0            | 1         | 1         |
| Egln2_j5    | 4.90101   | 5.64052   | 0            | 1         | 1         |
| Egln2_j6    | 0         | 0.202552  | 0            | 1         | 1         |
| Itpkc_j1    | 1.42722   | 2.13138   | 0.578584     | 2.27E-05  | 0.0006132 |
| Ltbp4_j1    | 0.110067  | 0.160745  | 0            | 1         | 1         |
| Spnb4_j1    | 1.57524   | 1.59215   | 0.0153981    | 0.9281    | 0.977771  |
| Spnb4_j2    | 0         | 0.215734  | 1.79769e+308 | 6.88E-07  | 3.00E-05  |
| Spnb4_j14   | 0.373198  | 0.0931278 | -2.00266     | 0.0609517 | 0.291245  |
| Pld3_j2     | 10.717    | 17.2637   | 0            | 1         | 1         |
| Zfp780b_j5  | 0.427277  | 1.02458   | 0            | 1         | 1         |
| BC089491_j1 | 1.71497   | 1.55494   | -0.141321    | 0.61737   | 0.84948   |
| Supt5h_j1   | 10.246    | 13.9175   | 0            | 1         | 1         |
| Supt5h_j8   | 0.115777  | 0.157951  | 0            | 1         | 1         |
| Plekhg2_j2  | 0.105683  | 0.184785  | 0            | 1         | 1         |
| Pak4_j3     | 0.504027  | 0.988997  | 0            | 1         | 1         |
| Pak4_j6     | 0.43763   | 0.870084  | 0            | 1         | 1         |
| Actn4_j4    | 7.70433   | 9.49283   | 0.301168     | 0.0310176 | 0.189865  |
| Zfp14_j4    | 0.13827   | 0.548178  | 0            | 1         | 1         |
| Zfp14       | 1.80236   | 1.07189   | 0            | 1         | 1         |
| Tbcb_j3     | 17.1593   | 18.2339   | 0.0876359    | 0.413969  | 0.732606  |
| Wdr62_j4    | 0.362636  | 0.69118   | 0.93054      | 0.154231  | 0.487254  |
| Wdr62_j5    | 0.0360104 | 0.0914369 | 1.34436      | 0.121774  | 1         |
| Wdr62_j6    | 0.106799  | 0.17102   | 0.679269     | 0.221504  | 0.568639  |
| Arhgap33_j8 | 0.560441  | 1.08204   | 0            | 1         | 1         |
| BC053749_j4 | 0.317998  | 0.423051  | 0.411813     | 0.339102  | 0.679393  |
| Wbp7_j7     | 0.391074  | 0.320921  | 0            | 1         | 1         |
| Zbtb32_j5   | 0.0155861 | 0.0771903 | 2.30816      | 0.2195    | 1         |
| Cox6b1_j1   | 267.084   | 271.259   | 0.0223776    | 0.811053  | 0.938047  |
| Tmem147_j1  | 23.3403   | 21.6614   | -0.107691    | 0.496116  | 0.783139  |
| Usf2_j11    | 2.08545   | 1.33727   | 0            | 1         | 1         |
| Usf2_j12    | 0.0190638 | 0.166815  | 0            | 1         | 1         |

|                  |           |           |              |           |           |
|------------------|-----------|-----------|--------------|-----------|-----------|
| Lsr_j3           | 0.292237  | 0.441884  | 0.596528     | 0.0700256 | 0.317628  |
| Lsr_j4           | 0.064255  | 0.184147  | 1.51898      | 0.0863404 | 0.359     |
| Fxyd5_j5         | 2.97859   | 4.12113   | 0            | 1         | 1         |
| Fxyd7            | 184.582   | 198.157   | 0            | 1         | 1         |
| Fxyd1            | 38.4504   | 47.215    | 0            | 1         | 1         |
| Fxyd3_j1         | 7.36327   | 9.0064    | 0            | 1         | 1         |
| Fxyd3_j2         | 5.4408    | 6.27131   | 0            | 1         | 1         |
| Hpn_j3           | 0.0709166 | 0.172581  | 1.28308      | 0.346483  | 0.685483  |
| Hpn_j5           | 0.196587  | 0.153372  | -0.358131    | 0.666085  | 0.87348   |
| Scn1b_j3         | 11.7308   | 7.4478    | -0.65542     | 0.0002772 | 0.0050075 |
| Scn1b_j4         | 0.0746396 | 0.324125  | 2.11854      | 0.0620333 | 0.294737  |
| Gramd1a_j4       | 13.9227   | 18.9426   | 0            | 1         | 1         |
| Gpi1_j4          | 5.51964   | 5.37697   | 0            | 1         | 1         |
| 4931406P16Rik_j6 | 0.643479  | 1.54175   | 0            | 1         | 1         |
| XLOC_030330      | 0.0815051 | 0.126458  | 0.633691     | 0.362286  | 1         |
| Kctd15           | 0         | 0.393572  | 0            | 1         | 1         |
| Lrp3_j2          | 8.33431   | 10.0673   | 0            | 1         | 1         |
| Pdcd5_j9         | 0.16545   | 0.180409  | 0.124878     | 0.901523  | 0.968734  |
| Pdcd5_j10        | 0.0834078 | 0.410404  | 2.29879      | 0.0170216 | 0.125845  |
| Pop4_j2          | 0.626793  | 2.01025   | 0            | 1         | 1         |
| BC063263_j6      | 0.056174  | 0.532479  | 0            | 1         | 1         |
| BC063263_j7      | 0.479394  | 0.431952  | 0            | 1         | 1         |
| RP23-390N24.1_j1 | 0.0923987 | 0.110814  | 0.262201     | 1         | 1         |
| Gm5595           | 0.361758  | 0.598227  | 0.725668     | 0.045775  | 0.24486   |
| 4931406B18Rik_j1 | 0         | 0.245219  | 1.79769e+308 | 0.0002823 | 0.0050832 |
| Cd33_j4          | 0         | 0.10294   | 1.79769e+308 | 0.109032  | 1         |
| Cd33_j5          | 0.0357364 | 0.133468  | 1.90103      | 0.0936503 | 1         |
| Siglece_j5       | 0         | 0.135153  | 1.79769e+308 | 0.0653955 | 1         |
| AK134755_j1      | 0.0178972 | 0.074637  | 2.06015      | 0.308879  | 1         |
| AK134755_j2      | 0.118785  | 0.0776874 | -0.6126      | 0.509061  | 1         |
| 1700008O03Rik_j7 | 0         | 0.39096   | 0            | 1         | 1         |
| Pold1_j2         | 0.323403  | 0.559407  | 0            | 1         | 1         |
| Myh14_j5         | 9.62484   | 9.50818   | 0            | 1         | 1         |
| Tbc1d17          | 0.860258  | 1.53976   | 0            | 1         | 1         |
| Ptov1_j3         | 66.8084   | 75.1566   | 0            | 1         | 1         |
| Ptov1_j4         | 4.30236   | 3.39111   | 0            | 1         | 1         |
| Ptov1            | 2.33482   | 2.68934   | 0            | 1         | 1         |
| Ap2a1_j4         | 45.6549   | 44.5498   | 0            | 1         | 1         |
| Cpt1c_j2         | 0.516274  | 0.371136  | 0            | 1         | 1         |
| Cpt1c_j1         | 2.16749   | 2.39168   | 0            | 1         | 1         |
| Scaf1_j3         | 11.8769   | 13.0707   | 0            | 1         | 1         |
| Rcn3_j1          | 0.314263  | 0.808583  | 1.36342      | 0.0163377 | 0.122254  |
| Rpl13a_j5        | 0.784517  | 0.385051  | -1.02675     | 0.222363  | 0.569453  |
| Flt3l_j3         | 0.088956  | 0.0665876 | -0.417839    | 0.767046  | 1         |
| Flt3l_j14        | 0.127949  | 0.181633  | 0.505452     | 0.672726  | 0.876472  |
| Dkk1_j2          | 0.0438083 | 0.103176  | 1.23583      | 0.388497  | 1         |
| Cd37             | 0.133079  | 0.0309383 | -2.10481     | 0.331996  | 1         |



|                   |           |                        |           |           |          |
|-------------------|-----------|------------------------|-----------|-----------|----------|
| Trpm4             | 0.365114  | 0.468322               | 0         | 1         | 1        |
| Ppfia3_j2         | 1.87817   | 1.95473                | 0         | 1         | 1        |
| Snrnp70_j3        | 4.67309   | 5.17284                | 0         | 1         | 1        |
| Dhdh_j2           | 0.113919  | 0.242969               | 0         | 1         | 1        |
| Nucb1_j1          | 31.7705   | 32.8084                | 0         | 1         | 1        |
| Sec1_j2           | 0.12713   | 0.16908                | 0.4114    | 0.429928  | 0.743005 |
| Sphk2_j2          | 12.6362   | 13.4354                | 0         | 1         | 1        |
| Sult2b1           | 0         | 0.298544 1.79769e+308  |           | 0.004146  | 0.044054 |
| Sult2b1_j2        | 0         | 0.0897689 1.79769e+308 |           | 0.0877979 | 1        |
| Grin2d_j1         | 0.16389   | 0.150204               | -0.125803 | 0.876055  | 0.960645 |
| Saa1              | 0         | 0.10351 1.79769e+308   |           | 0.162654  | 1        |
| Hps5_j1           | 4.7316    | 4.52149                | 0         | 1         | 1        |
| Tsg101_j2         | 41.9498   | 42.5136                | 0.019262  | 0.908147  | 0.971038 |
| Ptpn5_j2          | 0.841136  | 2.27664                | 0         | 1         | 1        |
| XLOC_030431       | 0.920497  | 1.04768                | 0         | 1         | 1        |
| XLOC_030436       | 0.0110848 | 0.120027               | 3.43671   | 0.173159  | 1        |
| Gabrg3            | 0.202398  | 0.24181                | 0.256682  | 0.79272   | 0.931005 |
| Snrpn_j3          | 3.05958   | 2.38247                | 0         | 1         | 1        |
| A230057D06Rik_j3  | 1.02317   | 1.11438                | 0.123191  | 0.624881  | 0.853557 |
| Fan1_j3           | 0.3017    | 0.42715                | 0.501629  | 0.21164   | 0.556466 |
| Fam189a1_j3       | 0.0883393 | 0.130755               | 0.565743  | 0.399818  | 1        |
| Tjp1_j3           | 0.375612  | 1.15965                | 1.62637   | 8.29E-11  | 8.61E-09 |
| Asb7_j1           | 1.99479   | 2.08572                | 0         | 1         | 1        |
| Mef2a_j1          | 0.474473  | 0.438875               | 0         | 1         | 1        |
| Lrrc28_j3         | 0.877232  | 0.954404               | 0         | 1         | 1        |
| Lrrc28_j2         | 0.930435  | 1.23121                | 0         | 1         | 1        |
| AK014683_j3       | 0.211073  | 0.147242               | -0.519553 | 0.612388  | 0.847359 |
| Mctp2_j2          | 0.130306  | 0.11617                | 0         | 1         | 1        |
| Mctp2_j1          | 0.44667   | 0.754905               | 0         | 1         | 1        |
| Chd2_j9           | 0.118716  | 0.138623               | 0.223657  | 0.644119  | 1        |
| Ntrk3_j2          | 2.23011   | 1.07778                | 0         | 1         | 1        |
| E430016F16Rik_j11 | 0         | 0.12586 1.79769e+308   |           | 0.0035069 | 1        |
| E430016F16Rik_j12 | 0.315136  | 0.110132               | -1.51674  | 0.0130534 | 0.104463 |
| Hapln3_j3         | 0.515453  | 0.575204               | 0.158233  | 0.638015  | 0.859928 |
| Mfge8_j1          | 0.168566  | 1.06049                | 0         | 1         | 1        |
| Anpep_j1          | 0.379299  | 0.59666                | 0.653573  | 0.15895   | 0.493426 |
| Cib1_j1           | 4.74191   | 5.3275                 | 0         | 1         | 1        |
| Unc45a_j9         | 2.49502   | 2.60335                | 0.0613158 | 1         | 1        |
| Fes_j1            | 0.0994779 | 0.0756097              | -0.395806 | 0.689439  | 1        |
| Blm_j1            | 0.172143  | 0.270185               | 0.650337  | 0.0897084 | 0.367406 |
| Wdr73             | 2.19514   | 2.19755                | 0         | 1         | 1        |
| Sec11a_j1         | 1.01476   | 1.2083                 | 0.251846  | 0.699197  | 0.889208 |
| Rps17_j1          | 0.090556  | 0.0706429              | -0.358265 | 0.701321  | 1        |
| Rps17_j3          | 0.0477958 | 0 -1.79769e+308        |           | 0.0394603 | 1        |
| Rps17_j2          | 0.148746  | 0.215685               | 0.536078  | 0.441661  | 0.750302 |
| Cpeb1_j2          | 6.98831   | 5.61096                | 0         | 1         | 1        |
| Cpeb1_j3          | 2.63137   | 1.86635                | 0         | 1         | 1        |

|                  |             |           |              |           |           |
|------------------|-------------|-----------|--------------|-----------|-----------|
| Cpeb1            | 30.9046     | 30.6433   | 0            | 1         | 1         |
| Ap3b2_j2         | 42.1394     | 47.6609   | 0            | 1         | 1         |
| 3110040N11Rik_j2 | 3.74251     | 3.91235   | 0.0640324    | 0.820619  | 0.94198   |
| Hdgfrp3_j1       | 0.172154    | 0.089644  | 0            | 1         | 1         |
| Fam154b_j2       | 0.0555666   | 0.0471419 | 0            | 1         | 1         |
| AK042300_j4      | 1.57737     | 1.57962   | 0            | 1         | 1         |
| 9930013L23Rik_j3 | 0.0610275   | 0.159685  | 1.3877       | 0.0325406 | 0.196107  |
| Fah_j5           | 2.56816     | 5.45324   | 0            | 1         | 1         |
| Tmem135_j2       | 0           | 2.52863   | 0            | 1         | 1         |
| Prss23_j2        | 0.000140726 | 0.419096  | 0            | 1         | 1         |
| Ankrd42          | 0.291264    | 0.304645  | 0.0648043    | 0.87107   | 0.959002  |
| Ankrd42_j2       | 1.57333     | 1.71341   | 0.123048     | 0.601125  | 0.841992  |
| Pcf11_j1         | 3.15064     | 3.69864   | 0.23135      | 0.202366  | 0.545957  |
| Myo7a_j11        | 0.0822906   | 0.258851  | 1.65332      | 0.222247  | 0.569443  |
| Capn5_j2         | 0           | 0.243953  | 0            | 1         | 1         |
| Serpinh1_j2      | 4.54999     | 6.78672   | 0            | 1         | 1         |
| Slco2b1_j4       | 0           | 0.0861882 | 1.79769e+308 | 0.0153186 | 1         |
| Rnf169_j5        | 0.512659    | 0.929419  | 0            | 1         | 1         |
| Rnf169_j6        | 0.361473    | 0.414169  | 0            | 1         | 1         |
| Ppme1_j1         | 32.5492     | 36.5044   | 0            | 1         | 1         |
| Dnajb13_j2       | 0.0360921   | 0.136229  | 1.91628      | 0.349858  | 1         |
| Relt_j6          | 0.000124899 | 0.624821  | 0            | 1         | 1         |
| Arhgef17_j4      | 12.8616     | 12.4082   | -0.0517749   | 0.67823   | 0.879011  |
| Atg16l2_j4       | 0           | 0.0480116 | 1.79769e+308 | 0.0333077 | 1         |
| Atg16l2_j13      | 0.742993    | 0.824004  | 0.149304     | 0.578191  | 0.830224  |
| Atg16l2          | 0.463668    | 0.488177  | 0.074315     | 0.836635  | 0.947727  |
| Inpp1_j5         | 0.312652    | 0.430666  | 0            | 1         | 1         |
| Inpp1_j7         | 0.0798941   | 0.301429  | 0            | 1         | 1         |
| Trim5_j1         | 0.0785379   | 0.0973194 | 0.309339     | 0.732244  | 1         |
| Trim12a_j4       | 0           | 0.107165  | 1.79769e+308 | 0.0321086 | 1         |
| Trim30a_j5       | 0           | 0.101224  | 1.79769e+308 | 0.0171427 | 1         |
| Trim30d_j1       | 0           | 0.102451  | 1.79769e+308 | 0.0193867 | 1         |
| Rrp8_j1          | 0.840094    | 0.88603   | 0.0768047    | 0.759476  | 0.91718   |
| Taf10            | 7.69334     | 8.78302   | 0.191107     | 0.0732519 | 0.325981  |
| Tpp1_j1          | 0           | 0.209464  | 1.79769e+308 | 0.0014637 | 0.0193557 |
| Lmo1_j5          | 6.50371     | 6.25746   | 0            | 1         | 1         |
| St5_j6           | 1.35688     | 1.31865   | 0            | 1         | 1         |
| St5_j7           | 0           | 0.184076  | 0            | 1         | 1         |
| Dennd5a_j2       | 1.21762     | 1.19345   | 0            | 1         | 1         |
| Rnf141_j4        | 7.92889     | 7.26661   | 0            | 1         | 1         |
| Rnf141_j3        | 2.48968     | 1.18826   | 0            | 1         | 1         |
| Eif4g2_j2        | 72.7461     | 85.2256   | 0            | 1         | 1         |
| Galntl4_j3       | 4.50445     | 6.11583   | 0            | 1         | 1         |
| Calca_j6         | 0           | 0.22215   | 0            | 1         | 1         |
| XLOC_030670      | 0.341966    | 0.347483  | 0.0230888    | 0.937548  | 0.980924  |
| Plekha7_j5       | 0.109506    | 0.208442  | 0.928636     | 0.0593056 | 0.286271  |
| Plekha7_j7       | 0.041606    | 0.212546  | 2.35291      | 0.0365713 | 0.211448  |

|                  |             |           |              |           |           |
|------------------|-------------|-----------|--------------|-----------|-----------|
| Plekha7_j12      | 0.403833    | 0.509049  | 0.334046     | 0.297439  | 0.644031  |
| Pik3c2a_j3       | 2.88968     | 2.84103   | -0.0244981   | 0.88551   | 0.963679  |
| Pik3c2a_j4       | 0.316684    | 0.391819  | 0.307145     | 0.324327  | 0.667432  |
| Arl6ip1_j1       | 1.47511     | 1.79361   | 0            | 1         | 1         |
| Syt17_j1         | 0.0756762   | 0.601824  | 2.99143      | 0.0028584 | 0.0331483 |
| Gde1_j1          | 0           | 0.133713  | 0            | 1         | 1         |
| Gde1_j2          | 0           | 0.0724908 | 0            | 1         | 1         |
| 2310008H09Rik_j3 | 4.80042     | 4.79282   | 0            | 1         | 1         |
| XLOC_030686      | 0.0743993   | 0.0829209 | 0.156446     | 0.909171  | 1         |
| XLOC_030686      | 0.264948    | 0.0841662 | -1.6544      | 0.0693621 | 0.315765  |
| XLOC_030686      | 0.0625495   | 0.0634739 | 0.0211654    | 0.992754  | 1         |
| Eri2_j2          | 0.141076    | 0.241111  | 0.773223     | 0.196695  | 0.539469  |
| Dcun1d3          | 3.68704     | 3.72787   | 0.0158899    | 0.899132  | 0.967684  |
| AK053178_j1      | 0.0374328   | 0.126783  | 1.75999      | 0.156823  | 1         |
| AK034016_j1      | 0           | 0.0607229 | 1.79769e+308 | 0.0807005 | 1         |
| AK034016_j2      | 0           | 0.060975  | 1.79769e+308 | 0.0823198 | 1         |
| Ears2_j1         | 0.14017     | 0.162876  | 0.216598     | 0.728617  | 0.903788  |
| Ndufab1_j5       | 0.630223    | 0.530337  | 0            | 1         | 1         |
| Palb2_j8         | 0.152595    | 0.0709212 | -1.10541     | 0.26742   | 0.616277  |
| Zkscan2_j1       | 0           | 0.107247  | 1.79769e+308 | 0.0008266 | 1         |
| XLOC_030708      | 0.207348    | 0.304339  | 0.553621     | 0.696433  | 0.888088  |
| Nsmce1_j4        | 0.354633    | 0.409081  | 0.206059     | 0.81098   | 0.938047  |
| Gtf3c1_j1        | 0.0446091   | 0.121104  | 0            | 1         | 1         |
| Gtf3c1_j2        | 3.66623     | 4.5641    | 0            | 1         | 1         |
| Xpo6_j4          | 0.140833    | 0.186474  | 0            | 1         | 1         |
| Atp2a1_j2        | 0.0480227   | 0.0961986 | 1.0023       | 0.417773  | 1         |
| Atxn2l_j4        | 0.62607     | 0.146649  | 0            | 1         | 1         |
| Atxn2l_j8        | 0.334652    | 0.392622  | 0            | 1         | 1         |
| Cln3_j4          | 0.887581    | 1.0304    | 0.215256     | 0.571997  | 0.827134  |
| Nupr1_j1         | 1.61104     | 1.47793   | -0.124413    | 0.798111  | 0.932954  |
| Sult1a1          | 2.89107     | 3.14015   | 0.119229     | 0.499776  | 0.78478   |
| Coro1a_j6        | 1.77681     | 2.12261   | 0.256553     | 0.0842109 | 0.354146  |
| Aldoa_j1         | 172.773     | 149.23    | 0            | 1         | 1         |
| Mvp_j7           | 6.83014     | 12.9161   | 0            | 1         | 1         |
| Maz_j1           | 28.3635     | 21.1626   | 0            | 1         | 1         |
| Tbc1d10b_j3      | 19.3474     | 21.0545   | 0.121989     | 0.287215  | 0.635532  |
| Sept1_j1         | 0.612036    | 0.602972  | -0.0215253   | 0.975504  | 0.992893  |
| Sept1_j2         | 0.000261389 | 0.264082  | 9.98057      | 0.865436  | 0.957089  |
| Sept1_j3         | 0.0527815   | 0.0561742 | 0.0898741    | 0.952836  | 1         |
| Zfp768_j1        | 2.32912     | 2.48415   | 0.0929727    | 0.639919  | 0.860804  |
| E430018J23Rik    | 0.592304    | 0.753461  | 0.347196     | 0.324876  | 0.668022  |
| Vkorc1_j2        | 18.8693     | 23.564    | 0.320547     | 0.0457181 | 0.244764  |
| Prss36_j3        | 0.261099    | 0.291744  | 0.160108     | 0.891058  | 0.965576  |
| XLOC_030761      | 0.192155    | 0.121234  | -0.664471    | 0.394083  | 0.719811  |
| XLOC_030761      | 0           | 0.125552  | 1.79769e+308 | 0.0206418 | 1         |
| Fgfr2_j6         | 0           | 0.143946  | 1.79769e+308 | 0.0154767 | 1         |
| Ikzf5_j3         | 0.551201    | 0.515257  | 0            | 1         | 1         |

|                  |            |           |              |           |           |
|------------------|------------|-----------|--------------|-----------|-----------|
| Cpxm2_j6         | 0.0229022  | 0.0724902 | 1.6623       | 0.196992  | 1         |
| Cpxm2_j5         | 0          | 0.116729  | 1.79769e+308 | 0.008088  | 1         |
| AK080057_j1      | 0.0485767  | 0.0742343 | 0.611821     | 0.737765  | 1         |
| Fam53b           | 1.56977    | 1.1538    | -0.44417     | 0.0351907 | 0.206504  |
| Fam53b_j2        | 2.29947    | 1.95258   | -0.235921    | 0.196939  | 0.539831  |
| Mettl10_j9       | 0.859517   | 1.13884   | 0.405965     | 0.394956  | 0.720135  |
| Dhx32            | 0.365187   | 0.679632  | 0            | 1         | 1         |
| D7Ert443e_j6     | 0          | 0.0669411 | 1.79769e+308 | 0.0498846 | 1         |
| 5830432E09Rik_j1 | 0.100332   | 0.16687   | 0            | 1         | 1         |
| XLOC_030791      | 0.10499    | 0.169236  | 0.688784     | 0.413997  | 0.732628  |
| XLOC_030792      | 0.0951161  | 0.13981   | 0.555711     | 0.512877  | 1         |
| Ebf3_j6          | 1.00773    | 1.49279   | 0            | 1         | 1         |
| Bnip3_j4         | 4.304      | 6.54582   | 0            | 1         | 1         |
| Adam8_j3         | 0.0815942  | 0.0807681 | -0.0146803   | 0.986213  | 1         |
| Adam8_j8         | 0          | 0.258794  | 1.79769e+308 | 0.0038248 | 0.0415564 |
| Tubgcp2_j3       | 0.137213   | 0.224735  | 0.711811     | 0.378594  | 0.710295  |
| Sigirr_j4        | 0          | 0.107042  | 1.79769e+308 | 0.0493363 | 1         |
| Irf7_j2          | 0.0913507  | 0.146862  | 0            | 1         | 1         |
| Irf7_j1          | 0.345782   | 0.907836  | 0            | 1         | 1         |
| B230206H07Rik_j3 | 0.113028   | 0.185214  | 0.712518     | 0.2796    | 0.628325  |
| Slc25a22_j3      | 3.04315    | 9.66802   | 0            | 1         | 1         |
| Slc25a22_j4      | 14.781     | 6.71542   | 0            | 1         | 1         |
| Slc25a22_j5      | 6.80761    | 11.1174   | 0            | 1         | 1         |
| Lrdd             | 0.186105   | 0.263972  | 0.504269     | 0.316825  | 0.660191  |
| XLOC_030832      | 0          | 0.0593409 | 1.79769e+308 | 0.102246  | 1         |
| 6330512M04Rik_j1 | 15.671     | 17.7505   | 0.179755     | 0.191032  | 0.533209  |
| 6330512M04Rik_j2 | 12.2191    | 11.1863   | -0.127403    | 0.539039  | 0.80831   |
| Th_j3            | 0          | 0.741633  | 0            | 1         | 1         |
| Cdkn1c_j5        | 0.34394    | 0.660742  | 0.941931     | 0.176337  | 0.515018  |
| Nap1l4_j3        | 4.1625     | 3.1189    | 0            | 1         | 1         |
| Cars_j1          | 1.40861    | 1.75658   | 0            | 1         | 1         |
| Cars_j2          | 1.46789    | 1.63498   | 0            | 1         | 1         |
| Osbp15_j2        | 3.99551    | 4.35319   | 0            | 1         | 1         |
| Nadsyn1_j9       | 0          | 0.207396  | 1.79769e+308 | 0.0086448 | 0.0769129 |
| Cttn_j4          | 0          | 0.955103  | 0            | 1         | 1         |
| Cttn_j5          | 0.00116665 | 0.110632  | 0            | 1         | 1         |
| 1810010D01Rik_j1 | 0.137891   | 0.195501  | 0.503652     | 0.572402  | 0.827134  |
| 1810010D01Rik    | 0.106231   | 0.151075  | 0.508064     | 0.523412  | 1         |
| Tpcn2_j2         | 0.540772   | 0.47079   | -0.199939    | 0.607245  | 0.845215  |
| Arhgef18_j1      | 3.01462    | 2.53034   | 0            | 1         | 1         |
| Zfp358           | 1.00058    | 1.05787   | 0            | 1         | 1         |
| Zfp358_j2        | 0.740326   | 0.102303  | 0            | 1         | 1         |
| Pnpla6_j4        | 1.04361    | 0.479903  | 0            | 1         | 1         |
| Pnpla6_j5        | 0.586838   | 0.299225  | 0            | 1         | 1         |
| 2310057J16Rik_j3 | 0.598995   | 0.588417  | 0            | 1         | 1         |
| 2310057J16Rik_j2 | 0.0499393  | 0         | 0            | 1         | 1         |
| 2310057J16Rik_j9 | 1.94162    | 3.66096   | 0            | 1         | 1         |

|                  |           |                 |            |           |           |
|------------------|-----------|-----------------|------------|-----------|-----------|
| 2900053A13Rik    | 6.02798   | 6.4597          | 0          | 1         | 1         |
| 2900053A13Rik_j2 | 0.377388  | 0.483105        | 0          | 1         | 1         |
| Stxbp2_j2        | 0.106739  | 0.029177        | 0          | 1         | 1         |
| Stxbp2_j3        | 0.0239798 | 0.0681649       | 0          | 1         | 1         |
| Stxbp2_j6        | 1.75065   | 1.63804         | 0          | 1         | 1         |
| Trappc5          | 12.1702   | 13.823          | 0.183719   | 0.107965  | 0.408438  |
| Evi5l_j7         | 1.47045   | 1.48693         | 0          | 1         | 1         |
| Map2k7_j1        | 12.4015   | 11.0048         | -0.172385  | 0.0842787 | 0.35428   |
| Map2k7_j2        | 0.179657  | 0.158741        | -0.178575  | 0.713464  | 0.896209  |
| Snpc2            | 8.09088   | 8.62546         | 0          | 1         | 1         |
| Snpc2_j2         | 1.45471   | 1.0585          | 0          | 1         | 1         |
| Lass4_j2         | 1.76816   | 1.24531         | 0          | 1         | 1         |
| Abhd13           | 1.68082   | 1.33308         | 0          | 1         | 1         |
| Tnfsf13b         | 0.51968   | 0.323292        | -0.684786  | 0.0163297 | 0.122232  |
| Myo16            | 0.236343  | 0.110406        | -1.09806   | 0.017886  | 0.130357  |
| Myo16_j5         | 0.167893  | 0 -1.79769e+308 | 0.0099694  | 0.08545   |           |
| Col4a2           | 4.07959   | 4.72401         | 0          | 1         | 1         |
| BC030398         | 0.213796  | 0.117641        | -0.861844  | 0.109335  | 0.411445  |
| Carkd            | 14.4437   | 15.5318         | 0          | 1         | 1         |
| Carkd_j2         | 1.58289   | 1.55506         | 0          | 1         | 1         |
| Ing1             | 2.5557    | 3.2904          | 0.364546   | 0.0843179 | 0.354323  |
| Ing1             | 6.59974   | 7.46985         | 0.17867    | 0.222658  | 0.569638  |
| Arhgef7          | 8.61808   | 9.31329         | 0.111924   | 0.281273  | 0.629634  |
| 4931415C17Rik    | 0.114756  | 0.147205        | 0          | 1         | 1         |
| Atp11a           | 32.8794   | 17.1527         | 0          | 1         | 1         |
| Atp11a_j2        | 1.32464   | 0.923286        | 0          | 1         | 1         |
| Mcf2l_j3         | 1.18191   | 1.64071         | 0.473199   | 0.0374788 | 0.214637  |
| Cul4a_j1         | 3.25151   | 2.28861         | 0          | 1         | 1         |
| Lamp1            | 56.4501   | 51.1853         | 0          | 1         | 1         |
| Lamp1_j2         | 56.0762   | 67.4134         | 0          | 1         | 1         |
| Tmco3            | 1.72508   | 1.70688         | 0          | 1         | 1         |
| Tfdp1_j12        | 0.0924141 | 0.0577583       | -0.678084  | 0.292431  | 1         |
| Tfdp1_j13        | 0.0943796 | 0.0560442       | -0.751911  | 0.216634  | 1         |
| Fam70b           | 0.15462   | 0.0876181       | -0.819429  | 0.43337   | 0.744767  |
| Cdc16            | 15.7457   | 17.0117         | 0.111569   | 0.289173  | 0.636786  |
| Upf3a            | 3.29903   | 3.52986         | 0.0975671  | 0.631239  | 0.8565    |
| Upf3a_j3         | 10.3887   | 11.2871         | 0.119661   | 0.4304    | 0.743173  |
| Zfp828           | 2.59048   | 2.57285         | 0          | 1         | 1         |
| Fbxo25_j2        | 5.71877   | 6.38174         | 0.158246   | 0.117394  | 0.426235  |
| Cln8             | 3.86815   | 3.32721         | 0          | 1         | 1         |
| Arhgef10_j9      | 0.861398  | 1.49768         | 0          | 1         | 1         |
| Kbtbd11_j3       | 1.00032   | 0.885282        | 0          | 1         | 1         |
| XLOC_032187      | 0.0934432 | 0 -1.79769e+308 | 0.0656199  |           | 1         |
| Mcp1             | 0.400334  | 0.157996        | -1.34132   | 0.003162  | 0.0359577 |
| Mcp1_j1          | 1.57262   | 1.51666         | -0.0522752 | 0.788381  | 0.929506  |
| Agpat5           | 7.94787   | 7.70783         | -0.0442422 | 0.670948  | 0.875546  |
| Rpl19-ps11       | 303.942   | 352.585         | 0.214173   | 0.0128638 | 0.103337  |

|             |           |                 |            |           |           |
|-------------|-----------|-----------------|------------|-----------|-----------|
| XLOC_032197 | 0.745943  | 0.800333        | 0.101535   | 0.752837  | 0.914587  |
| Alg11       | 2.66625   | 2.49628         | 0          | 1         | 1         |
| Alg11       | 4.478     | 3.99428         | 0          | 1         | 1         |
| Vps36       | 9.2672    | 10.1805         | 0.135607   | 0.202222  | 0.54575   |
| Thsd1_j2    | 0.091363  | 0.0997399       | 0.126559   | 0.832408  | 1         |
| Thsd1_j4    | 0.150209  | 0.170616        | 0.183777   | 0.689429  | 0.884848  |
| Slc20a2     | 3.0719    | 2.95009         | -0.0583735 | 0.714887  | 0.896766  |
| BC035532    | 0.985837  | 0.840868        | -0.229469  | 0.411108  | 0.730569  |
| Plat        | 6.11056   | 7.81851         | 0.35559    | 0.0044458 | 0.0465096 |
| Myst3       | 0.187955  | 0.481373        | 0          | 1         | 1         |
| Myst3       | 0.495154  | 0.249236        | 0          | 1         | 1         |
| Ank1_j2     | 2.66478   | 0               | 0          | 1         | 1         |
| Ank1_j8     | 13.8358   | 13.774          | 0          | 1         | 1         |
| Ank1_j7     | 4.62386   | 0.0418178       | 0          | 1         | 1         |
| Sfrp1_j1    | 0.327589  | 0.00308348      | 0          | 1         | 1         |
| Sfrp1       | 3.92011   | 5.12888         | 0          | 1         | 1         |
| Sfrp1_j2    | 4.2837    | 5.94278         | 0          | 1         | 1         |
| Zmat4       | 5.08962   | 4.26961         | 0          | 1         | 1         |
| Zmat4_j7    | 0.575005  | 0.152803        | 0          | 1         | 1         |
| Zmat4_j8    | 0.210564  | 0               | 0          | 1         | 1         |
| Tm2d2       | 23.228    | 25.9675         | 0          | 1         | 1         |
| Fgfr1       | 0.453356  | 0.501064        | 0          | 1         | 1         |
| Fgfr1_j3    | 0.0841103 | 0               | 0          | 1         | 1         |
| Whsc1l1     | 3.23353   | 2.78281         | -0.216567  | 0.185799  | 0.52617   |
| Kcnu1_j4    | 1.7359    | 1.58889         | -0.127666  | 0.680621  | 0.879921  |
| Kcnu1_j3    | 0.202366  | 0 -1.79769e+308 | 0.0049681  | 0.0504971 |           |
| Kcnu1_j5    | 0.876779  | 0.660857        | -0.407875  | 0.411029  | 0.730555  |
| Rnf170_j3   | 0.609285  | 0.425508        | -0.51793   | 0.477915  | 0.77269   |
| Rnf170_j5   | 7.05681   | 5.94265         | -0.247911  | 0.0533128 | 0.268707  |
| Thap1       | 0.421452  | 0.389431        | -0.114001  | 0.612306  | 0.847331  |
| Thap1_j2    | 0.465902  | 0.148323        | -1.65129   | 0.0370969 | 0.213277  |
| Thap1_j4    | 1.91259   | 1.43981         | -0.409646  | 0.149513  | 0.478977  |
| Zfp703      | 3.35526   | 3.18905         | -0.0732945 | 0.666501  | 0.873739  |
| Erlin2      | 1.41812   | 1.80166         | 0.345345   | 0.0850265 | 0.355889  |
| Erlin2_j1   | 0.380524  | 0.421698        | 0.148222   | 0.68937   | 0.884848  |
| Erlin2_j3   | 0.0510731 | 0 -1.79769e+308 | 0.0102851  | 1         |           |
| Prosc       | 17.2849   | 19.0987         | 0.143962   | 0.174893  | 0.513197  |
| Gpr124      | 1.38745   | 1.53108         | 0.142113   | 0.346301  | 0.685483  |
| Eif4ebp1_j1 | 0.843278  | 0.530719        | -0.66806   | 0.390775  | 0.717567  |
| Eif4ebp1    | 4.19927   | 6.50736         | 0.631934   | 0.0027224 | 0.0319506 |
| Eif4ebp1_j2 | 2.27471   | 3.7662          | 0.72743    | 0.0712937 | 0.321059  |
| Chrn3_j1    | 0.764397  | 0.802073        | 0          | 1         | 1         |
| Chrn3_j2    | 0.691152  | 0.415401        | 0          | 1         | 1         |
| Chrn3       | 0.138656  | 0.265398        | 0          | 1         | 1         |
| XLOC_032236 | 0.194397  | 0.0482496       | 0          | 1         | 1         |
| Dusp26      | 55.1626   | 58.9768         | 0          | 1         | 1         |
| Dusp26_j3   | 0.769617  | 0.187898        | 0          | 1         | 1         |

|                  |           |           |            |           |           |
|------------------|-----------|-----------|------------|-----------|-----------|
| Rnf122           | 0.487892  | 0.982014  | 1.00918    | 8.08E-05  | 0.0017883 |
| Rnf122           | 2.49216   | 5.27444   | 1.08162    | 0         | 0         |
| BC019943         | 1.21289   | 0.960888  | -0.336012  | 0.225501  | 0.572552  |
| BC019943         | 3.93354   | 3.99629   | 0.0228334  | 0.893864  | 0.966325  |
| Fut10            | 0.0855643 | 0.264925  | 1.6305     | 0.0076109 | 0.0701212 |
| Fut10            | 0.559758  | 0.147376  | -1.9253    | 0.0005513 | 0.0088566 |
| XLOC_032243      | 0.0783461 | 0.0954428 | 0.284776   | 0.831659  | 1         |
| XLOC_032243      | 0.161207  | 0.0705445 | -1.19231   | 0.457548  | 0.760484  |
| Tex15            | 0.170686  | 0.107458  | -0.667568  | 0.276335  | 0.625169  |
| Ppp2cb           | 6.84255   | 6.53795   | -0.0656972 | 0.582165  | 0.832693  |
| Gsr              | 28.7803   | 27.3301   | -0.0745928 | 0.438501  | 0.748143  |
| Gsr_j1           | 4.47472   | 2.68191   | -0.738536  | 0.0059494 | 0.0581327 |
| Gtf2e2           | 3.35253   | 2.18357   | -0.61856   | 0.0200871 | 0.141224  |
| Gtf2e2           | 8.15376   | 10.1053   | 0.309568   | 0.029612  | 0.184175  |
| Mboat4_j3        | 0.142566  | 0.370612  | 0          | 1         | 1         |
| Mboat4_j2        | 0.173852  | 0.226185  | 0          | 1         | 1         |
| Tmem66_j1        | 2.5645    | 2.48987   | 0          | 1         | 1         |
| Dusp4            | 0.87923   | 0.563597  | 0          | 1         | 1         |
| Ppp1r3b          | 0.735802  | 0.766508  | 0.0589823  | 0.795099  | 0.931579  |
| Mfhas1           | 4.69369   | 4.84645   | 0          | 1         | 1         |
| Mfhas1_j3        | 0.351327  | 0.349073  | 0          | 1         | 1         |
| XLOC_032261      | 0.324637  | 0.15066   | -1.10754   | 0.0313344 | 0.191101  |
| D8Ert82e         | 2.05112   | 3.4869    | 0.765534   | 7.23E-09  | 5.18E-07  |
| Kiaa1456         | 0.115527  | 0.104812  | -0.140422  | 0.822757  | 1         |
| Kiaa1456_j1      | 0.151048  | 0.0369761 | -2.03035   | 0.0381125 | 0.216951  |
| Tusc3_j3         | 0.678002  | 0.932323  | 0          | 1         | 1         |
| Tusc3_j7         | 24.7856   | 20.4753   | 0          | 1         | 1         |
| Tusc3_j10        | 5.61902   | 6.89624   | 0          | 1         | 1         |
| AK080223         | 0.14437   | 0.160503  | 0.15283    | 0.904549  | 0.969637  |
| XLOC_032269      | 0.0859825 | 0.0565242 | -0.605173  | 0.736873  | 1         |
| Efha2            | 5.82425   | 4.55324   | -0.355179  | 0.0020002 | 0.024953  |
| Zdhhc2           | 6.28463   | 5.5924    | -0.168359  | 0.183724  | 0.524378  |
| Slc7a2           | 3.86517   | 3.2417    | 0          | 1         | 1         |
| Slc7a2_j1        | 0.359464  | 0.0635621 | 0          | 1         | 1         |
| Pdgfrl           | 0.827979  | 0.829014  | 0.00180219 | 0.99474   | 0.998469  |
| Gm16348          | 0.141951  | 0.0362701 | -1.96854   | 0.124873  | 0.440234  |
| Pcm1             | 1.04757   | 0.836271  | 0          | 1         | 1         |
| Fat1_j1          | 4.10E-05  | 0.0834807 | 10.9924    | 0.752877  | 1         |
| Fat1             | 0.283846  | 0.174393  | -0.702767  | 0.0127023 | 0.102258  |
| Ufsp2_j2         | 1.98996   | 1.58118   | -0.331733  | 0.0656432 | 0.305455  |
| 4933411K20Rik    | 1.1185    | 0.931042  | 0          | 1         | 1         |
| 4933411K20Rik_j3 | 1.47346   | 1.39829   | 0          | 1         | 1         |
| 4933411K20Rik_j4 | 2.55596   | 2.19546   | 0          | 1         | 1         |
| Acsl1            | 6.50159   | 6.51145   | 0          | 1         | 1         |
| Acsl1_j1         | 1.97537   | 1.64082   | 0          | 1         | 1         |
| Acsl1_j3         | 0.166858  | 0         | 0          | 1         | 1         |
| Casp3            | 0.940728  | 2.41909   | 0          | 1         | 1         |

|                  |           |           |               |           |           |
|------------------|-----------|-----------|---------------|-----------|-----------|
| Casp3            | 5.94035   | 7.87068   | 0             | 1         | 1         |
| Irf2             | 9.10738   | 8.4672    | -0.105151     | 0.383996  | 0.71322   |
| Rwdd4a           | 7.49086   | 7.04117   | -0.0893168    | 0.459468  | 0.761406  |
| Dctd_j1          | 0.114329  | 0         | -1.79769e+308 | 0.0068129 | 1         |
| Dctd_j3          | 0.13503   | 4.05E-05  | -11.7034      | 0.96995   | 1         |
| AK032387_j1      | 0.174266  | 0.119104  | -0.54907      | 0.37953   | 0.710908  |
| AK032387_j6      | 0.0473432 | 0         | -1.79769e+308 | 0.0120646 | 1         |
| AK032387_j8      | 0.0780582 | 0.0402706 | -0.954823     | 0.399848  | 1         |
| AK032387_j11     | 0.0796587 | 0         | -1.79769e+308 | 0.002608  | 1         |
| Aga              | 8.10458   | 7.4097    | -0.129323     | 0.394284  | 0.719811  |
| Vegfc_j1         | 0.201402  | 0.120153  | -0.745203     | 0.283145  | 0.631632  |
| Gpm6a_j1         | 6.3442    | 5.21325   | 0             | 1         | 1         |
| Gpm6a_j2         | 4.98577   | 3.96408   | 0             | 1         | 1         |
| Hpgd             | 1.45977   | 2.45091   | 0.747577      | 0.0011351 | 0.0158259 |
| Fbxo8            | 2.59127   | 2.44411   | 0             | 1         | 1         |
| Fbxo8_j1         | 2.4915    | 2.73492   | 0             | 1         | 1         |
| AW046200_j1      | 0.133848  | 0.170729  | 0.351113      | 0.64026   | 0.860953  |
| AW046200_j2      | 0.200785  | 0.0556781 | -1.85047      | 0.100837  | 0.393219  |
| Mfap3l           | 2.34611   | 3.5335    | 0             | 1         | 1         |
| Mfap3l           | 8.66348   | 8.30592   | 0             | 1         | 1         |
| 2700029M09Rik    | 14.1609   | 13.4434   | -0.0750178    | 0.580606  | 0.831639  |
| Nek1             | 9.24882   | 8.6334    | 0             | 1         | 1         |
| Nek1_j2          | 3.41056   | 4.98235   | 0             | 1         | 1         |
| Nek1_j4          | 3.12449   | 2.63288   | 0             | 1         | 1         |
| Sh3rf1           | 1.20858   | 1.39359   | 0.20549       | 0.288952  | 0.636716  |
| Sh3rf1_j1        | 0.399453  | 0         | -1.79769e+308 | 1.56E-12  | 2.16E-10  |
| Sh3rf1_j2        | 0.96395   | 1.39619   | 0.534466      | 0.0168507 | 0.124999  |
| Cbr4             | 3.24699   | 3.24049   | -0.00289076   | 0.982676  | 0.9947    |
| Ddx60_j4         | 0.175585  | 0.0299398 | -2.55203      | 0.0079244 | 0.0721158 |
| Ddx60_j3         | 0.070213  | 0         | -1.79769e+308 | 0.0004087 | 1         |
| Spock3           | 2.34803   | 1.37757   | -0.769324     | 0.0263694 | 0.1706    |
| Spock3           | 7.91288   | 7.76691   | -0.0268638    | 0.877759  | 0.96086   |
| Tmem192          | 5.717     | 5.38486   | -0.086349     | 0.486501  | 0.777652  |
| March1           | 0.158115  | 0         | -1.79769e+308 | 4.80E-07  | 2.17E-05  |
| March1           | 0         | 0.170025  | 1.79769e+308  | 0.0001326 | 0.0027168 |
| Npy1r            | 4.1462    | 5.84513   | 0             | 1         | 1         |
| Npy1r_j3         | 2.74872   | 4.37032   | 0             | 1         | 1         |
| Npy1r_j1         | 1.54317   | 2.17977   | 0             | 1         | 1         |
| Naf1_j4          | 0.570661  | 0.674795  | 0.241816      | 0.553552  | 0.81725   |
| Nat2             | 0.910319  | 0.900036  | -0.0163897    | 0.961745  | 0.98919   |
| Sh2d4a           | 0.753498  | 0.426832  | -0.819935     | 0.0206833 | 0.144188  |
| Ints10_j4        | 0.565188  | 0.829534  | 0             | 1         | 1         |
| Lpl              | 0.959005  | 1.01951   | 0.0882675     | 0.688197  | 0.884104  |
| Atp6v1b2         | 240.953   | 229.086   | -0.0728598    | 0.411518  | 0.730729  |
| Zfp930           | 1.48131   | 1.33422   | 0             | 1         | 1         |
| Zfp930_j3        | 0.0583599 | 0         | 0             | 1         | 1         |
| D130040H23Rik_j1 | 0.162804  | 0.0549867 | -1.56598      | 0.15079   | 0.481561  |



|               |           |           |               |           |           |
|---------------|-----------|-----------|---------------|-----------|-----------|
| Atp13a1_j6    | 4.51708   | 4.70264   | 0             | 1         | 1         |
| Pbx4          | 1.14103   | 1.06298   | -0.102211     | 0.735308  | 0.906704  |
| Pbx4          | 0.479874  | 0.229777  | -1.06242      | 0.0695941 | 0.316357  |
| Pbx4_j1       | 1.04956   | 0.979314  | -0.099939     | 0.764609  | 0.919286  |
| Sugp1         | 1.21375   | 1.67726   | 0             | 1         | 1         |
| Tm6sf2_j6     | 0.103657  | 0.193349  | 0             | 1         | 1         |
| Tm6sf2_j13    | 0.0622928 | 0         | 0             | 1         | 1         |
| Hapln4_j1     | 4.974     | 1.40799   | 0             | 1         | 1         |
| Hapln4        | 6.23425   | 2.42462   | 0             | 1         | 1         |
| Nr2c2ap_j1    | 8.0578    | 8.84922   | 0.135164      | 0.422127  | 0.738238  |
| Mef2b_j1      | 18.2483   | 18.2564   | 0.000644323   | 0.995913  | 0.998864  |
| 2310045N01Rik | 2.31019   | 2.47521   | 0.0995382     | 0.583398  | 0.833129  |
| Tmem161a      | 13.8546   | 13.9195   | 0.00673678    | 0.951586  | 0.986024  |
| Sugp2_j5      | 0.454879  | 0.165293  | 0             | 1         | 1         |
| Cope          | 39.5785   | 41.4221   | 0.0656851     | 0.473484  | 0.770096  |
| Lass1         | 1.70513   | 1.37195   | -0.313656     | 0.0177221 | 0.129434  |
| Crlf1_j6      | 0.4577    | 0.458007  | 0.000970066   | 0.99853   | 0.999371  |
| Crlf1_j5      | 0.249403  | 0.0156976 | -3.98986      | 0.133143  | 0.454156  |
| Crlf1         | 0         | 1.11843   | 1.79769e+308  | 3.64E-07  | 1.68E-05  |
| Fkbp8_j4      | 24.8803   | 25.5007   | 0             | 1         | 1         |
| Fkbp8         | 153.631   | 165.999   | 0             | 1         | 1         |
| Eil           | 3.34413   | 3.25101   | -0.040746     | 0.799638  | 0.933125  |
| Lrrc25_j1     | 0.0353315 | 0.307385  | 3.12102       | 0.0208752 | 0.145215  |
| Lrrc25        | 0.377775  | 0.781044  | 1.04788       | 0.0043314 | 0.045586  |
| Lsm4          | 30.0768   | 32.5956   | 0.116024      | 0.326232  | 0.669409  |
| Pde4c_j5      | 0.351548  | 0.0915598 | -1.94094      | 0.0082479 | 0.0743039 |
| Pde4c_j12     | 0.210582  | 0.0375605 | -2.48709      | 0.0455242 | 0.244264  |
| Pde4c_j16     | 0.296826  | 0.0708712 | -2.06635      | 0.034705  | 0.204618  |
| Rab3a         | 66.4728   | 53.9014   | 0             | 1         | 1         |
| Rab3a_j1      | 110.157   | 81.2526   | 0             | 1         | 1         |
| Mtap1s        | 19.88     | 21.2195   | 0.0940696     | 0.322842  | 0.665895  |
| XLOC_032360   | 0.232881  | 0.149997  | -0.634659     | 0.526971  | 0.801327  |
| XLOC_032360   | 0.146176  | 0.046088  | -1.66525      | 0.380078  | 0.711123  |
| Myo9b_j2      | 0.0765467 | 0.0601103 | -0.348729     | 0.634511  | 1         |
| Myo9b_j1      | 0.356412  | 0.0186304 | -4.25782      | 0.0002235 | 0.0042041 |
| Myo9b_j10     | 0.122118  | 0.092704  | -0.397569     | 0.633928  | 1         |
| Myo9b_j19     | 0.564498  | 1.10589   | 0.970174      | 0.0440425 | 0.239045  |
| Use1          | 17.702    | 16.5837   | -0.0941502    | 0.478959  | 0.773348  |
| Use1_j2       | 0.556447  | 0.466082  | -0.255661     | 0.689401  | 0.884848  |
| Ocel1         | 0.924131  | 0.966315  | 0             | 1         | 1         |
| Ocel1         | 1.14776   | 1.1837    | 0             | 1         | 1         |
| 5430437P03Rik | 25.9599   | 24.1418   | -0.104753     | 0.311931  | 0.656418  |
| Mrpl34        | 13.733    | 14.4721   | 0.0756332     | 0.564473  | 0.823391  |
| Gtpbp3_j1     | 1.85998   | 1.5365    | -0.275637     | 0.277056  | 0.626132  |
| Gtpbp3        | 0.110028  | 0         | -1.79769e+308 | 2.11E-07  | 1         |
| Fam125a       | 18.9962   | 19.5754   | 0.0433285     | 0.737331  | 0.907482  |
| Pgls_j1       | 12.1817   | 16.4881   | 0.436702      | 0.0170093 | 0.125773  |

|                  |           |                 |            |           |           |
|------------------|-----------|-----------------|------------|-----------|-----------|
| Jak3_j3          | 0.177854  | 0.166352        | -0.0964541 | 0.782103  | 0.926378  |
| Zfp709           | 0.691044  | 0.662805        | -0.0601935 | 0.758113  | 0.916768  |
| Zfp617_j2        | 0.128963  | 0.0555948       | 0          | 1         | 1         |
| Zfp617_j1        | 0.398135  | 0.25687         | 0          | 1         | 1         |
| Zfp617_j8        | 3.70653   | 4.33141         | 0          | 1         | 1         |
| Zfp961           | 0.659419  | 0.341117        | -0.950929  | 0.0340164 | 0.201923  |
| Zfp961_j1        | 0.775585  | 0.108681        | -2.83519   | 0.0002843 | 0.0051126 |
| Tpm4_j1          | 8.21099   | 11.7852         | 0.521347   | 1.78E-05  | 0.0005038 |
| Rab8a            | 5.5209    | 6.12142         | 0.148963   | 0.174106  | 0.512143  |
| Fam32a           | 16.7949   | 16.38           | -0.0360838 | 0.709529  | 0.894303  |
| Ap1m1            | 68.0361   | 70.1486         | 0.044113   | 0.615722  | 0.848504  |
| 1700030K09Rik    | 1.29714   | 1.27746         | -0.0220637 | 0.876166  | 0.960645  |
| XLOC_032385      | 0.113305  | 0.0835403       | -0.439671  | 0.327596  | 1         |
| Tmem38a          | 0.393527  | 0.323226        | -0.283922  | 0.389482  | 0.716664  |
| Nwd1_j1          | 0.055322  | 0 -1.79769e+308 |            | 0.0001474 | 1         |
| Hmgxb4_j1        | 0.25498   | 0.0644466       | 0          | 1         | 1         |
| Hmgxb4           | 0.830065  | 0.132121        | 0          | 1         | 1         |
| Hmgxb4_j7        | 1.76032   | 1.42925         | 0          | 1         | 1         |
| Tom1_j1          | 0.0542989 | 0.100867        | 0.893465   | 0.550232  | 1         |
| Tom1_j10         | 0.449765  | 0.353136        | -0.348948  | 0.671757  | 0.876082  |
| Tom1_j14         | 0.249206  | 0.170855        | -0.544564  | 0.421828  | 0.737912  |
| Hmox1            | 12.5136   | 10.7522         | -0.218865  | 0.0979565 | 0.386817  |
| Mcm5             | 0.272183  | 0.167159        | -0.703358  | 0.259132  | 0.607838  |
| Rasd2            | 2.71698   | 1.48427         | -0.872252  | 3.52E-06  | 0.0001244 |
| 1700007B14Rik_j1 | 0.155615  | 0.127719        | -0.285014  | 0.717369  | 0.898075  |
| Nr3c2_j1         | 0.529229  | 0.190334        | 0          | 1         | 1         |
| Prmt10           | 7.75288   | 6.05495         | 0          | 1         | 1         |
| Prmt10_j2        | 4.62139   | 4.28325         | 0          | 1         | 1         |
| Ttc29_j4         | 0.143638  | 0.0941114       | -0.609998  | 0.570256  | 0.826188  |
| Zfp827_j1        | 0.143463  | 0.186153        | 0.37581    | 0.487495  | 0.778377  |
| Zfp827           | 3.93052   | 4.1196          | 0.0677856  | 0.534756  | 0.80586   |
| Zfp827           | 0.0663411 | 0.0336879       | -0.977674  | 0.381392  | 1         |
| Otud4            | 0.684658  | 0.57697         | 0          | 1         | 1         |
| Otud4_j5         | 4.99973   | 5.34141         | 0          | 1         | 1         |
| Inpp4b_j1        | 0.259244  | 0 -1.79769e+308 |            | 0.001823  | 0.0232179 |
| Inpp4b_j4        | 0.124592  | 0.104432        | -0.254646  | 0.747255  | 1         |
| Tbc1d9_j2        | 11.3016   | 5.76644         | -0.970767  | 4.44E-16  | 1.02E-13  |
| XLOC_032410      | 0.525374  | 0.536096        | 0.029147   | 0.903274  | 0.969087  |
| Clgn             | 10.1535   | 7.32727         | 0          | 1         | 1         |
| Clgn_j5          | 3.02586   | 3.87886         | 0          | 1         | 1         |
| Gipc1            | 15.2302   | 14.5423         | 0          | 1         | 1         |
| Gipc1_j2         | 20.5833   | 28.108          | 0          | 1         | 1         |
| Ddx39            | 1.17289   | 1.57345         | 0.423873   | 0.0137213 | 0.107947  |
| Lphn1_j1         | 2.27547   | 2.50562         | 0          | 1         | 1         |
| Lphn1            | 6.86555   | 5.01927         | 0          | 1         | 1         |
| Lphn1_j4         | 8.87706   | 8.42211         | 0          | 1         | 1         |
| Asf1b            | 0.700518  | 0.373059        | -0.909019  | 0.0297358 | 0.184678  |

|                  |           |                 |             |           |           |
|------------------|-----------|-----------------|-------------|-----------|-----------|
| Samd1            | 7.54272   | 8.98429         | 0.25232     | 0.0974016 | 0.385751  |
| Palm3_j2         | 4.84911   | 2.07613         | 0           | 1         | 1         |
| Palm3_j1         | 0.732192  | 0.649779        | 0           | 1         | 1         |
| Rfx1             | 0.110207  | 0.0812376       | -0.439992   | 0.277279  | 1         |
| 4930432K21Rik_j1 | 0.167587  | 0.0192093       | -3.12504    | 0.0564676 | 0.278053  |
| 4930432K21Rik    | 0.324779  | 0.126684        | -1.35822    | 0.0456038 | 0.244415  |
| Cacna1a          | 4.32787   | 2.00071         | 0           | 1         | 1         |
| Cacna1a_j6       | 0.176795  | 0.161057        | 0           | 1         | 1         |
| Lyl1             | 0.144423  | 0.20571         | 0.510307    | 0.287109  | 0.635532  |
| Lyl1_j3          | 0.0438032 | 0.273102        | 2.64033     | 0.0145192 | 0.11232   |
| Lyl1_j5          | 0.113967  | 0.32459         | 1.51        | 0.0672482 | 0.310074  |
| Gadd45gip1       | 0.933243  | 0.91539         | -0.0278656  | 0.897206  | 0.967319  |
| Farsa            | 14.5959   | 16.6877         | 0.193223    | 0.0760051 | 0.332943  |
| Syce2_j3         | 0.075614  | 0.187297        | 0           | 1         | 1         |
| Prdx2            | 25.9698   | 28.2309         | 0           | 1         | 1         |
| Hook2_j2         | 0.0711053 | 0.23767         | 1.74093     | 0.0218937 | 0.150018  |
| Hook2_j4         | 0.0824501 | 0 -1.79769e+308 | 0.0137929   |           | 1         |
| 2310036O22Rik    | 42.2385   | 49.7916         | 0.237344    | 0.0219541 | 0.150334  |
| Tnpo2_j3         | 0.0913525 | 0.139105        | 0.606658    | 0.339183  | 1         |
| Tnpo2            | 10.8969   | 7.59719         | -0.520376   | 4.41E-06  | 0.0001513 |
| Tnpo2_j5         | 0.288666  | 0.114706        | -1.33146    | 0.0232642 | 0.1563    |
| Dhps             | 3.8955    | 4.40189         | 0.176314    | 0.22668   | 0.573724  |
| Dhps_j1          | 13.5578   | 15.1458         | 0.159792    | 0.271419  | 0.620302  |
| Man2b1_j3        | 1.99586   | 2.3332          | 0.2253      | 0.182     | 0.522379  |
| Gpt2             | 4.9593    | 4.76483         | 0           | 1         | 1         |
| Gpt2_j3          | 11.99     | 11.3497         | 0           | 1         | 1         |
| Lonp2            | 20.6498   | 19.7668         | -0.0630484  | 0.522227  | 0.798757  |
| Gm2694           | 0.66284   | 0.26881         | -1.30207    | 0.274811  | 0.623805  |
| Gm2694_j1        | 0.199592  | 0.1878          | -0.0878635  | 0.944495  | 0.983497  |
| Gm2694_j4        | 0.427722  | 0.130469        | -1.71297    | 0.218678  | 0.564944  |
| Gm2694_j5        | 0.740073  | 0.484156        | -0.612198   | 0.4536    | 0.758086  |
| Tmem188_j1       | 1.99448   | 1.29489         | -0.623181   | 0.302579  | 0.648559  |
| Tmem188          | 17.0578   | 17.0405         | -0.00146525 | 0.989595  | 0.996774  |
| Heatr3           | 6.04344   | 5.68672         | -0.0877733  | 0.486005  | 0.777413  |
| Papd5            | 0.794125  | 0.24997         | 0           | 1         | 1         |
| Adcy7            | 0.460996  | 0.456678        | -0.0135767  | 0.956032  | 0.987435  |
| Nkd1             | 1.04385   | 0.891972        | -0.226848   | 0.33493   | 0.675691  |
| Nod2_j1          | 0.0511771 | 0.0150776       | -1.76309    | 0.230057  | 1         |
| Nod2_j5          | 0.142707  | 0 -1.79769e+308 |             | 7.35E-06  | 0.0002371 |
| Nod2_j8          | 0.143426  | 0 -1.79769e+308 |             | 0.0003005 | 0.0053492 |
| Cyld_j2          | 0.277085  | 0               | 0           | 1         | 1         |
| Cyld             | 1.92688   | 1.37999         | 0           | 1         | 1         |
| Cyld_j5          | 0.739292  | 0.505728        | 0           | 1         | 1         |
| Cyld_j6          | 1.66133   | 1.0952          | 0           | 1         | 1         |
| XLOC_032460      | 0.0639653 | 0 -1.79769e+308 |             | 0.0262721 | 1         |
| Chd9             | 1.515     | 1.95138         | 0.365176    | 0.137708  | 0.461575  |
| Chd9_j7          | 0.0711191 | 0 -1.79769e+308 |             | 2.04E-06  | 1         |

|             |           |                 |             |           |           |
|-------------|-----------|-----------------|-------------|-----------|-----------|
| Chd9_j15    | 0.744481  | 1.51721         | 1.02711     | 3.06E-09  | 2.34E-07  |
| Rbl2_j1     | 3.3838    | 3.01396         | 0           | 1         | 1         |
| Rbl2_j2     | 0.806525  | 0.752964        | 0           | 1         | 1         |
| Fto         | 24.081    | 23.1927         | 0           | 1         | 1         |
| BC100534_j1 | 0.129965  | 0.0595368       | -1.12627    | 0.319274  | 1         |
| Mmp2        | 1.64152   | 2.72898         | 0.73333     | 7.89E-05  | 0.0017546 |
| Mmp2_j1     | 1.5911    | 3.3486          | 1.07354     | 1.03E-06  | 4.23E-05  |
| Lpcat2      | 1.21793   | 2.00861         | 0.721758    | 0.0012283 | 0.0168601 |
| XLOC_032468 | 0.127624  | 0.0784008       | -0.70296    | 0.556401  | 1         |
| Gnao1_j3    | 16.1966   | 14.1191         | 0           | 1         | 1         |
| Gnao1_j7    | 0.157385  | 0               | 0           | 1         | 1         |
| Ogfod1      | 5.78334   | 5.60118         | 0           | 1         | 1         |
| Mt3         | 170.738   | 180.318         | 0.0787594   | 0.378164  | 0.709762  |
| Mt2_j2      | 3.85758   | 3.04835         | -0.33967    | 0.427489  | 0.741759  |
| Mt1         | 39.9224   | 46.8692         | 0.231442    | 0.0334071 | 0.199595  |
| Nup93       | 13.9252   | 13.4926         | 0           | 1         | 1         |
| Slc12a3_j3  | 0.168342  | 8.29E-05        | 0           | 1         | 1         |
| Herpud1     | 19.7805   | 18.932          | -0.0632552  | 0.566481  | 0.824486  |
| Herpud1_j2  | 4.78185   | 6.68633         | 0.483644    | 0.0110897 | 0.0925168 |
| Ap3s1-ps2   | 15.9184   | 15.8146         | -0.00943632 | 0.940062  | 0.981805  |
| Nlrc5_j6    | 0.0852623 | 0.0606318       | -0.491834   | 0.496768  | 1         |
| Nlrc5_j9    | 0.0989347 | 0.0400279       | -1.30547    | 0.220495  | 1         |
| Cpne2       | 14.9706   | 16.7371         | 0.160918    | 0.113612  | 0.419374  |
| Rspry1      | 9.019     | 8.70495         | -0.0511313  | 0.633373  | 0.857531  |
| Arl2bp      | 6.99988   | 7.95173         | 0           | 1         | 1         |
| Arl2bp_j3   | 0.0810027 | 0.0397335       | 0           | 1         | 1         |
| Cx3cl1      | 2.25115   | 2.40188         | 0.0935058   | 0.559995  | 0.820988  |
| Ccl17_j1    | 0.160681  | 0.127476        | -0.333966   | 0.673121  | 0.876767  |
| Coq9        | 8.8828    | 8.12461         | 0           | 1         | 1         |
| Polr2c_j2   | 0.0584147 | 0.155966        | 1.41683     | 0.0316504 | 1         |
| Gpr56       | 6.98502   | 5.87405         | 0           | 1         | 1         |
| Gpr56_j3    | 0.0744925 | 0.676975        | 0           | 1         | 1         |
| Katnb1      | 15.7184   | 15.5915         | -0.011694   | 0.910809  | 0.972008  |
| AA960436    | 0.970788  | 1.0215          | 0           | 1         | 1         |
| Mmp15       | 14.2195   | 12.223          | 0           | 1         | 1         |
| Gins3       | 0.565865  | 0.539869        | -0.0678483  | 0.820326  | 0.941821  |
| Ndr4_j2     | 374.506   | 329.018         | 0           | 1         | 1         |
| Ndr4_j7     | 2.34919   | 24.9485         | 0           | 1         | 1         |
| Ndr4_j10    | 8.89936   | 0               | 0           | 1         | 1         |
| Setd6       | 0.0416881 | 0.0548638       | 0           | 1         | 1         |
| Gm10094     | 54.8658   | 56.0738         | 0.0314193   | 0.754738  | 0.915405  |
| Gm15210     | 22.509    | 26.1283         | 0.215113    | 0.0361549 | 0.209962  |
| XLOC_032505 | 0.113419  | 0 -1.79769e+308 |             | 0.0004202 | 1         |
| XLOC_032505 | 0.122138  | 0.0424418       | -1.52495    | 0.139781  | 1         |
| XLOC_032505 | 0.0915267 | 0.0193682       | -2.2405     | 0.167373  | 1         |
| Cdh5        | 3.60502   | 3.1109          | -0.212677   | 0.13446   | 0.456328  |
| Bean1_j3    | 27.1533   | 33.9238         | 0           | 1         | 1         |

|               |           |                 |            |           |           |
|---------------|-----------|-----------------|------------|-----------|-----------|
| Bean1         | 3.71801   | 3.00371         | 0          | 1         | 1         |
| XLOC_032507   | 0.206373  | 0.186081        | 0          | 1         | 1         |
| CKLF6_j2      | 0.58303   | 0.518503        | -0.169216  | 0.599332  | 0.841178  |
| CKLF6_j1      | 0.299486  | 0 -1.79769e+308 |            | 4.67E-12  | 6.01E-10  |
| Cmtm3_j3      | 1.04887   | 0.268242        | -1.96722   | 0.0031594 | 0.0359372 |
| Car7          | 0.231106  | 0.132333        | -0.804377  | 0.321418  | 0.664505  |
| Car7          | 0.819882  | 0.258926        | -1.66287   | 0.0077126 | 0.0708039 |
| Car7_j3       | 0.271609  | 0.0461747       | -2.55636   | 0.0841224 | 0.353898  |
| Pdp2          | 1.44785   | 1.46272         | 0.014735   | 0.93059   | 0.978776  |
| Ces2g_j5      | 0.175952  | 0 -1.79769e+308 |            | 0.0001105 | 0.0023408 |
| D230025D16Rik | 5.81865   | 5.62229         | -0.0495262 | 0.661942  | 0.871832  |
| E2f4          | 5.07354   | 5.67165         | 0.160777   | 0.228826  | 0.575849  |
| Elmo3_j8      | 0.304843  | 0.39263         | 0.365103   | 0.425474  | 0.74056   |
| Elmo3_j9      | 0.0771423 | 0.0183734       | -2.0699    | 0.11822   | 1         |
| Tmem208       | 11.7912   | 11.8214         | 0          | 1         | 1         |
| Tmem208_j2    | 8.77176   | 8.1473          | 0          | 1         | 1         |
| Slc9a5_j3     | 0.146765  | 0 -1.79769e+308 |            | 0.0002313 | 0.0043239 |
| Slc9a5_j1     | 0.156637  | 0 -1.79769e+308 |            | 8.32E-05  | 0.0018329 |
| Slc9a5_j2     | 0.273223  | 0.330077        | 0.272723   | 0.54545   | 0.81235   |
| XLOC_032521   | 0.131328  | 0.0636968       | -1.04388   | 0.352106  | 1         |
| Plekhg4_j4    | 0.101597  | 0.039939        | -1.34699   | 0.255074  | 1         |
| Plekhg4_j11   | 0.210083  | 0.0452157       | -2.21606   | 0.0525657 | 0.266344  |
| Fam65a_j2     | 4.70752   | 3.5112          | 0          | 1         | 1         |
| Rltpr_j3      | 0.152172  | 0.0011151       | 0          | 1         | 1         |
| Rltpr_j2      | 12.9157   | 12.705          | 0          | 1         | 1         |
| Rltpr_j4      | 0.873984  | 0               | 0          | 1         | 1         |
| Nutf2_j2      | 1.00532   | 0.941671        | -0.0943631 | 0.782397  | 0.926474  |
| Edc4_j4       | 0.0504489 | 0.0598021       | 0.245372   | 0.789421  | 1         |
| Edc4_j3       | 0.198606  | 0.190707        | -0.058547  | 0.902795  | 0.968994  |
| Nrn1l         | 6.52796   | 6.64939         | 0.0265895  | 0.901922  | 0.968734  |
| Nrn1l_j2      | 5.42764   | 5.26469         | -0.0439755 | 0.83227   | 0.945814  |
| Nrn1l         | 1.61821   | 1.41489         | -0.19371   | 0.662911  | 0.872283  |
| Pskh1         | 3.18644   | 3.24421         | 0.0259195  | 0.869368  | 0.958432  |
| Dus2l_j1      | 0.227813  | 0.116687        | 0          | 1         | 1         |
| Dus2l         | 0.464982  | 0.608076        | 0          | 1         | 1         |
| Dus2l         | 2.27712   | 2.7831          | 0          | 1         | 1         |
| Nfatc3        | 0.564549  | 1.04748         | 0          | 1         | 1         |
| Nfatc3        | 1.60866   | 1.67154         | 0          | 1         | 1         |
| Pla2g15       | 7.39873   | 9.00626         | 0.283652   | 0.019824  | 0.13996   |
| Slc7a6        | 3.25571   | 3.55777         | 0.128004   | 0.2521    | 0.600154  |
| Prmt7         | 8.35279   | 8.73225         | 0.0640958  | 0.510459  | 0.791113  |
| Zfp90_j1      | 1.69308   | 1.80885         | 0          | 1         | 1         |
| Zfp90         | 1.09556   | 1.42251         | 0          | 1         | 1         |
| Cdh3          | 0.0571697 | 0.102117        | 0.836907   | 0.315136  | 1         |
| Cdh1_j1       | 14.3825   | 9.37397         | 0          | 1         | 1         |
| Cdh1_j4       | 10.0378   | 11.9736         | 0          | 1         | 1         |
| Tmco7_j3      | 0.332847  | 0.33539         | 0.0109786  | 0.980283  | 0.994006  |

|              |           |                 |             |           |           |
|--------------|-----------|-----------------|-------------|-----------|-----------|
| Tmco7        | 0.707199  | 0.570801        | -0.309129   | 0.22422   | 0.571444  |
| Has3_j3      | 0.394984  | 0.398409        | 0.0124526   | 0.965033  | 0.990054  |
| Cirh1a       | 5.33865   | 4.89023         | 0           | 1         | 1         |
| Sntb2_j2     | 0.0649885 | 0 -1.79769e+308 |             | 5.39E-05  | 1         |
| Sntb2        | 0.959464  | 0.928461        | -0.0473871  | 0.79583   | 0.931999  |
| Vps4a        | 43.0635   | 46.1993         | 0.101403    | 0.259004  | 0.607774  |
| Cyb5b        | 29.8047   | 27.6858         | 0           | 1         | 1         |
| Cyb5b_j1     | 17.6848   | 22.772          | 0           | 1         | 1         |
| AK015813_j1  | 0.437762  | 0.000734923     | -9.21834    | 0.842293  | 0.950233  |
| AK015813_j6  | 0.107572  | 0.0832829       | -0.369217   | 0.85298   | 1         |
| XLOC_032547  | 0.138586  | 0.0445766       | -1.63642    | 0.169662  | 0.506699  |
| Nfat5_j1     | 0.164847  | 0.0887008       | -0.894112   | 0.0379683 | 0.216418  |
| Nfat5_j9     | 0.737937  | 0.3508          | -1.07285    | 7.65E-06  | 0.0002451 |
| Wwp2         | 1.55737   | 1.55978         | 0.00222911  | 0.989005  | 0.996607  |
| Zfhx3_j1     | 0.603864  | 0.643968        | 0           | 1         | 1         |
| Zfhx3_j4     | 2.50386   | 2.31477         | 0           | 1         | 1         |
| Pmfbp1_j1    | 0.15229   | 0.0431651       | -1.81889    | 0.0379805 | 0.216437  |
| Pmfbp1_j2    | 0.078512  | 0 -1.79769e+308 |             | 0.0005174 | 1         |
| Pmfbp1_j5    | 2.17E-05  | 0.129824        | 12.5493     | 0.945762  | 1         |
| Pkd1l3_j1    | 0.151147  | 0.109354        | -0.466947   | 0.518448  | 0.796491  |
| Zfp821       | 0.114976  | 0               | 0           | 1         | 1         |
| Ap1g1        | 8.27271   | 6.78428         | 0           | 1         | 1         |
| Phlpp2       | 1.32116   | 1.1082          | 0           | 1         | 1         |
| Phlpp2_j3    | 0.116312  | 0.0187318       | 0           | 1         | 1         |
| Zfp612       | 1.79329   | 1.86713         | 0           | 1         | 1         |
| Zfp612       | 1.68218   | 1.41864         | 0           | 1         | 1         |
| Zfp612_j2    | 0.376107  | 0.298069        | 0           | 1         | 1         |
| Ftsjd1       | 2.10842   | 1.88274         | -0.163328   | 0.318924  | 0.662268  |
| Vac14        | 11.4211   | 11.6919         | 0.0338065   | 0.746527  | 0.911752  |
| Mtss1l_j2    | 0.769151  | 0.551218        | 0           | 1         | 1         |
| Cog4         | 30.699    | 31.3769         | 0.0315102   | 0.728286  | 0.903676  |
| St3gal2      | 4.02494   | 3.04299         | 0           | 1         | 1         |
| St3gal2_j1   | 0.105056  | 0.0882862       | 0           | 1         | 1         |
| Aars         | 26.1496   | 28.5004         | 0           | 1         | 1         |
| Pdpr         | 0.438007  | 0.329569        | 0           | 1         | 1         |
| Znrf1_j1     | 0.741235  | 0.468962        | 0           | 1         | 1         |
| Znrf1        | 3.62143   | 4.97471         | 0           | 1         | 1         |
| Zfp1         | 0.783086  | 0.716415        | -0.128375   | 0.678784  | 0.879317  |
| Zfp1         | 0.251304  | 0.15563         | -0.691314   | 0.260675  | 0.609434  |
| Gabarapl2    | 6.38007   | 5.93109         | -0.105276   | 0.432162  | 0.744128  |
| Gabarapl2_j1 | 0.0725673 | 0.116161        | 0.678739    | 0.390594  | 1         |
| Terf2ip      | 5.71606   | 6.21092         | 0.119785    | 0.335569  | 0.676259  |
| XLOC_032577  | 0.146413  | 0 -1.79769e+308 |             | 0.0052531 | 0.052605  |
| Cntnap4      | 4.40966   | 3.77406         | -0.22455    | 0.0811276 | 0.34681   |
| Mon1b        | 0.346576  | 0.462469        | 0           | 1         | 1         |
| Mon1b        | 5.98251   | 4.99581         | 0           | 1         | 1         |
| Nudt7        | 1.63225   | 1.623           | -0.00820357 | 0.963428  | 0.989786  |

|                  |             |                 |            |           |           |
|------------------|-------------|-----------------|------------|-----------|-----------|
| Vat1l            | 11.3162     | 10.8339         | 0          | 1         | 1         |
| Wwox_j4          | 0.172529    | 0.229519        | 0.411776   | 0.587258  | 0.834951  |
| Atmin            | 21.8265     | 20.5647         | -0.0859066 | 0.336543  | 0.676991  |
| Gan              | 1.83092     | 2.40764         | 0          | 1         | 1         |
| XLOC_032587      | 0.5908      | 0.104121        | 0          | 1         | 1         |
| 4933407C03Rik    | 28.3236     | 27.0719         | 0          | 1         | 1         |
| 4933407C03Rik_j2 | 10.339      | 9.26679         | 0          | 1         | 1         |
| 4933407C03Rik_j4 | 8.9032      | 12.5654         | 0          | 1         | 1         |
| Plcg2            | 0.149348    | 0.187714        | 0.329861   | 0.523211  | 0.799177  |
| Plcg2_j4         | 0.137374    | 0.0355469       | -1.95032   | 0.0725425 | 0.324146  |
| Plcg2_j5         | 1.46376     | 0.800458        | -0.870785  | 0.0059964 | 0.0585098 |
| Cdh13            | 2.23053     | 2.26038         | 0.0191738  | 0.902     | 0.968734  |
| Hsbp1            | 71.1433     | 79.4158         | 0.158698   | 0.0735667 | 0.326919  |
| Mlycd            | 7.32657     | 7.4828          | 0.0304404  | 0.827099  | 0.944289  |
| Osgin1           | 0.863582    | 0.132916        | -2.69982   | 0.0001592 | 0.0031706 |
| Necab2           | 8.60677     | 6.48456         | -0.408463  | 0.003863  | 0.041831  |
| Wfdc1            | 1.54721     | 1.22058         | -0.342102  | 0.196215  | 0.538985  |
| Klhl36           | 0.573781    | 0.555643        | -0.0463419 | 0.841311  | 0.949906  |
| Usp10            | 7.94088     | 6.94509         | 0          | 1         | 1         |
| Usp10            | 4.72953     | 4.35991         | 0          | 1         | 1         |
| Crispld2         | 0.85989     | 0.606652        | 0          | 1         | 1         |
| Crispld2         | 0.465598    | 0.870283        | 0          | 1         | 1         |
| Gse1_j5          | 0.104364    | 0.27007         | 1.37171    | 0.0027448 | 0.0321441 |
| Gse1_j8          | 3.21574     | 2.37548         | -0.43693   | 0.0029831 | 0.0342832 |
| Gm10614          | 0.138651    | 0.0876273       | -0.662004  | 0.381678  | 0.711997  |
| XLOC_032603      | 0.168194    | 0.11133         | -0.595279  | 0.446049  | 0.75332   |
| Cox4i1           | 50.3216     | 52.7742         | 0          | 1         | 1         |
| Cox4i1_j2        | 115.76      | 185.706         | 0          | 1         | 1         |
| Irf8_j3          | 0.19089     | 0 -1.79769e+308 | 0.0042457  | 0.0447999 |           |
| Map1lc3b_j1      | 125.511     | 165.365         | 0          | 1         | 1         |
| Jph3             | 5.63159     | 4.82545         | 0          | 1         | 1         |
| Jph3_j3          | 17.9348     | 15.5953         | 0          | 1         | 1         |
| Banp_j7          | 0.111569    | 0 -1.79769e+308 | 1.98E-05   | 1         | 1         |
| Banp_j6          | 0.236279    | 0.0189174       | -3.6427    | 0.0032832 | 0.037034  |
| Banp             | 0.000108252 | 0.282972        | 11.3521    | 0.701845  | 0.890467  |
| Banp_j10         | 0.338955    | 0.0919749       | -1.88178   | 0.0012813 | 0.0174408 |
| XLOC_032613      | 0.147986    | 0.0809743       | -0.869926  | 0.16182   | 0.496808  |
| Zfpm1            | 0.175955    | 0.263004        | 0.579874   | 1         | 1         |
| Zc3h18           | 3.8962      | 4.6817          | 0.264962   | 0.0435016 | 0.236848  |
| AK209590         | 0.872983    | 0.847599        | -0.0425713 | 0.874473  | 0.960101  |
| Ctu2_j1          | 3.29215     | 3.49462         | 0.0861056  | 0.724482  | 0.901947  |
| Ctu2             | 1.55168     | 1.99992         | 0.366108   | 0.0194609 | 0.138318  |
| Cdt1             | 0.203736    | 0.429359        | 1.07549    | 0.0060578 | 0.0590149 |
| Trappc2l         | 44.9471     | 47.1788         | 0.0699135  | 0.540174  | 0.808768  |
| Acsf3            | 6.15347     | 4.4885          | 0          | 1         | 1         |
| Acsf3_j3         | 2.71847     | 4.6618          | 0          | 1         | 1         |
| XLOC_032621      | 0.0882045   | 0.0600645       | -0.554341  | 0.574772  | 1         |

|               |           |                 |            |           |           |
|---------------|-----------|-----------------|------------|-----------|-----------|
| Cdh15         | 1.93197   | 1.97443         | 0.0313606  | 0.868334  | 0.958268  |
| Cdh15_j2      | 4.82912   | 3.90663         | -0.305838  | 0.17492   | 0.513197  |
| Spg7_j1       | 12.4271   | 11.7363         | 0          | 1         | 1         |
| Spg7_j2       | 1.99815   | 1.67457         | 0          | 1         | 1         |
| Rpl13_j2      | 3.81669   | 3.43473         | 0          | 1         | 1         |
| Cpne7_j1      | 0.126127  | 0.0956826       | -0.398545  | 0.671358  | 1         |
| Dpep1_j2      | 0.177229  | 0 -1.79769e+308 |            | 0.0003787 | 0.0064846 |
| Dpep1         | 0.416572  | 0.713878        | 0.77711    | 0.0114543 | 0.0946995 |
| Cdk10         | 5.55057   | 5.84128         | 0          | 1         | 1         |
| Zfp276        | 2.24273   | 2.63388         | 0.231932   | 0.142612  | 0.469297  |
| Zfp276_j1     | 0.722951  | 0.868735        | 0.265017   | 0.318903  | 0.662268  |
| Spire2        | 24.3089   | 19.4497         | 0          | 1         | 1         |
| Tcf25_j4      | 50.2178   | 53.4381         | 0          | 1         | 1         |
| Tubb3         | 142.069   | 177.604         | 0.322073   | 0.0002589 | 0.0047543 |
| Def8          | 0.779737  | 0.605305        | -0.365326  | 0.0955716 | 0.381629  |
| Def8          | 21.5907   | 21.0107         | -0.0392876 | 0.683281  | 0.881397  |
| Afg3l1        | 0.713358  | 0.860144        | 0          | 1         | 1         |
| Afg3l1_j1     | 0.653631  | 0.512402        | 0          | 1         | 1         |
| Afg3l1_j4     | 0.6305    | 0.544844        | 0          | 1         | 1         |
| Gas8          | 11.1556   | 13.4271         | 0.267385   | 0.0237685 | 0.158595  |
| Rhou          | 6.36501   | 6.67788         | 0          | 1         | 1         |
| Rab4a_j1      | 0.243391  | 0.0656463       | 0          | 1         | 1         |
| Gm4342        | 11.5539   | 14.7801         | 0          | 1         | 1         |
| mKIAA0133_j1  | 0         | 0.121207        | 0          | 1         | 1         |
| mKIAA0133_j3  | 1.43423   | 0.930131        | 0          | 1         | 1         |
| Galnt2        | 7.50757   | 7.25416         | 0          | 1         | 1         |
| Cog2          | 2.09984   | 2.25159         | 0          | 1         | 1         |
| Capn9_j1      | 2.73039   | 2.57823         | 0          | 1         | 1         |
| Trim67        | 0.987796  | 0.645976        | -0.612731  | 0.002761  | 0.0322486 |
| Gnpat         | 3.57709   | 4.00678         | 0.163658   | 0.130461  | 0.449719  |
| Gm505         | 1.82214   | 1.53507         | -0.247327  | 0.0970734 | 0.385109  |
| Tsnax         | 5.53984   | 5.14564         | 0          | 1         | 1         |
| XLOC_032650   | 0.132372  | 0.075227        | 0          | 1         | 1         |
| Disc1_j4      | 0.195366  | 0.221596        | 0.181753   | 0.676266  | 0.878159  |
| 4933403G14Rik | 0.655267  | 0.832815        | 0.345915   | 0.106189  | 0.404635  |
| XLOC_032653   | 0.196602  | 0.100161        | -0.972951  | 0.0702163 | 0.318226  |
| Ntpcr         | 10.4916   | 10.5487         | 0          | 1         | 1         |
| BC021891      | 0.669574  | 0.603296        | -0.150379  | 0.550556  | 0.815393  |
| Kcnk1_j1      | 7.11408   | 3.73394         | -0.929977  | 6.38E-07  | 2.80E-05  |
| Kcnk1         | 5.19347   | 3.33057         | -0.64093   | 0.0005846 | 0.0092745 |
| Kcnk1_j2      | 0.485319  | 0.181417        | -1.41962   | 0.103653  | 0.399185  |
| Slc35f3       | 1.49863   | 0.81003         | -0.887597  | 0.0031004 | 0.0353565 |
| Slc35f3_j7    | 0.131733  | 0 -1.79769e+308 |            | 0.0042583 | 1         |
| 1810063B05Rik | 1.75468   | 1.76366         | 0.0073633  | 0.959562  | 0.988456  |
| Pard3         | 0.633576  | 0.420575        | -0.591154  | 0.0669975 | 0.309452  |
| Pard3         | 0.0421639 | 0.0485297       | 0.20286    | 0.828204  | 1         |
| Pard3         | 0.211686  | 0 -1.79769e+308 |            | 2.89E-09  | 2.22E-07  |



|             |           |                 |            |           |           |
|-------------|-----------|-----------------|------------|-----------|-----------|
| Pard3       | 0.111688  | 0.000510435     | -7.77353   | 0.290994  | 1         |
| Pard3_j10   | 0.47419   | 0.73693         | 0.63606    | 0.130231  | 0.449278  |
| XLOC_032660 | 0.138483  | 0.0512736       | -1.43342   | 0.411074  | 0.730561  |
| Nrp1_j2     | 0.13823   | 0.107576        | 0          | 1         | 1         |
| Nrp1_j4     | 1.91734   | 1.86158         | 0          | 1         | 1         |
| Itgb1       | 8.41559   | 9.11959         | 0.115905   | 0.314986  | 0.659067  |
| Itgb1_j3    | 0.080017  | 0.0889538       | 0.152749   | 0.882987  | 1         |
| Insr        | 1.18784   | 1.08446         | -0.131358  | 0.431556  | 0.743686  |
| Pex11c      | 0.591579  | 0.266359        | -1.1512    | 0.00899   | 0.0790315 |
| Xab2        | 8.85966   | 8.69379         | -0.0272653 | 0.820279  | 0.941821  |
| AK019114    | 0.0876052 | 0.0808012       | -0.11664   | 0.903848  | 1         |
| AK019114_j1 | 0.0956666 | 0.0302104       | -1.66297   | 0.384535  | 1         |
| AK019114_j2 | 0.0623745 | 0.0449579       | -0.472383  | 0.760154  | 1         |
| Cd209a      | 0.232927  | 0.381189        | 0.710627   | 0.159884  | 0.494385  |
| Gm17605     | 21.0615   | 21.0009         | -0.0041544 | 0.969565  | 0.991454  |
| Timm44_j3   | 0.0676612 | 0               | 0          | 1         | 1         |
| Timm44      | 0.0721496 | 0.0259622       | 0          | 1         | 1         |
| Elavl1_j1   | 3.29815   | 3.78088         | 0          | 1         | 1         |
| Shcbp1      | 0.3886    | 0.326576        | -0.250865  | 0.511571  | 0.791678  |
| Efnb2_j1    | 3.4872    | 2.32843         | 0          | 1         | 1         |
| Efnb2       | 3.1746    | 1.85046         | 0          | 1         | 1         |
| Arglu1      | 3.47957   | 3.5783          | 0          | 1         | 1         |
| Arglu1_j1   | 9.51316   | 8.80679         | 0          | 1         | 1         |
| XLOC_032681 | 0.0768905 | 0 -1.79769e+308 |            | 0.0347249 | 1         |
| XLOC_032681 | 0.233083  | 0.109774        | -1.08631   | 0.251532  | 0.599417  |
| Fam155a_j2  | 1.1251    | 0.115566        | 0          | 1         | 1         |
| Fam155a_j1  | 0.862676  | 1.62058         | 0          | 1         | 1         |
| Lig4        | 2.31629   | 1.95068         | 0          | 1         | 1         |
| Lig4_j1     | 0.92188   | 0.973086        | 0          | 1         | 1         |
| Irs2_j1     | 16.7987   | 27.5813         | 0          | 1         | 1         |
| Irs2        | 4.68228   | 6.06623         | 0          | 1         | 1         |
| Col4a1      | 8.56524   | 9.99873         | 0          | 1         | 1         |
| Rab20       | 0.682034  | 0.627005        | -0.121366  | 0.745879  | 0.911456  |
| Cars2_j1    | 0.604518  | 0 -1.79769e+308 |            | 6.53E-09  | 4.76E-07  |
| Cars2       | 5.977     | 5.57092         | -0.101506  | 0.514352  | 0.793394  |
| Ankrd10_j6  | 1.29318   | 1.69954         | 0          | 1         | 1         |
| Ankrd10     | 0.320029  | 0.274457        | 0          | 1         | 1         |
| Ankrd10_j3  | 0.644211  | 0.873127        | 0          | 1         | 1         |
| Tubgcp3_j2  | 5.67809   | 5.71713         | 0          | 1         | 1         |
| Tubgcp3     | 2.98234   | 2.73097         | 0          | 1         | 1         |
| Pcid2       | 1.4348    | 1.30478         | 0          | 1         | 1         |
| Pcid2_j3    | 1.25034   | 1.08054         | 0          | 1         | 1         |
| Grtp1       | 0.374827  | 0.387963        | 0          | 1         | 1         |
| Adprhl1     | 0.425893  | 0.273401        | -0.639473  | 0.205874  | 0.550399  |
| Dcun1d2     | 5.32435   | 4.40194         | 0          | 1         | 1         |
| Gas6        | 74.4747   | 59.7804         | -0.317077  | 0.0002483 | 0.0045976 |
| Rasa3_j1    | 3.8858    | 4.96159         | 0.352593   | 0.0230378 | 0.155364  |

|                  |           |             |               |           |           |
|------------------|-----------|-------------|---------------|-----------|-----------|
| Rasa3            | 3.53681   | 3.39564     | -0.0587671    | 0.680512  | 0.879921  |
| 2410022L05Rik    | 21.2132   | 19.5884     | -0.114962     | 0.341658  | 0.681558  |
| 2610019F03Rik_j7 | 0.039445  | 0.717982    | 0             | 1         | 1         |
| 2610019F03Rik_j6 | 1.17057   | 0.000473303 | 0             | 1         | 1         |
| Erich1_j2        | 0.682991  | 1.52793     | 0             | 1         | 1         |
| Erich1           | 1.56972   | 0.616867    | 0             | 1         | 1         |
| Csmd1_j7         | 0.237639  | 0.281981    | 0.246826      | 0.329305  | 0.67155   |
| XLOC_032707      | 0.169055  | 0.159546    | -0.0835193    | 0.916228  | 0.973929  |
| Angpt2           | 6.31678   | 6.16179     | -0.0358383    | 0.775591  | 0.923873  |
| XLOC_032713      | 0.0592794 | 0.0419837   | -0.497703     | 0.74368   | 1         |
| 6820431F20Rik_j2 | 1.30367   | 0.716828    | -0.862878     | 0.0001313 | 0.0026978 |
| Nek3             | 3.05876   | 2.83277     | -0.110733     | 0.544307  | 0.811356  |
| Ckap2_j1         | 0         | 0.238474    | 1.79769e+308  | 0.0010532 | 0.0148838 |
| Ckap2_j2         | 0.120061  | 0.0474476   | -1.33936      | 0.30335   | 1         |
| Ckap2            | 0.427908  | 0.0127882   | -5.06442      | 0.0154286 | 0.117303  |
| Slc25a15_j3      | 0.461813  | 0.343044    | 0             | 1         | 1         |
| Slc25a15_j4      | 0.185283  | 0           | 0             | 1         | 1         |
| Slc25a15         | 0.946302  | 0.678034    | 0             | 1         | 1         |
| Al316807         | 15.5465   | 15.1646     | -0.0358846    | 0.778882  | 0.925554  |
| Vdac3_j2         | 0.649179  | 0.488092    | 0             | 1         | 1         |
| Polb             | 13.9405   | 15.6057     | 0.162796      | 0.210456  | 0.55502   |
| Ikbkb_j1         | 0.0736874 | 0           | 0             | 1         | 1         |
| Ap3m2            | 6.3971    | 9.09628     | 0             | 1         | 1         |
| Agpat6           | 29.4782   | 33.2033     | 0.171679      | 0.0570836 | 0.279916  |
| Gins4            | 7.9413    | 7.6085      | -0.0617623    | 0.677419  | 0.878715  |
| Golga7_j5        | 0.0643612 | 0           | 0             | 1         | 1         |
| Ido2_j1          | 0.127552  | 0.0996178   | -0.356614     | 0.640404  | 1         |
| Adam5_j2         | 0.0960137 | 8.45E-06    | -13.4722      | 0.991901  | 1         |
| Adam5_j5         | 0.169013  | 0           | -1.79769e+308 | 0.0002637 | 0.0048156 |
| Adam9            | 4.59345   | 5.9181      | 0             | 1         | 1         |
| Plekha2_j2       | 3.84516   | 4.25409     | 0             | 1         | 1         |
| Plekha2          | 1.58381   | 0.968966    | 0             | 1         | 1         |
| Tacc1_j2         | 0.56728   | 0.608818    | 0             | 1         | 1         |
| Tacc1_j1         | 0.258093  | 0           | 0             | 1         | 1         |
| Ddhd2_j1         | 1.2542    | 1.30945     | 0.0621922     | 0.717949  | 0.898424  |
| Bag4             | 6.27935   | 5.80614     | -0.113038     | 0.311863  | 0.656405  |
| Ash2l_j1         | 9.30402   | 8.65061     | -0.105052     | 0.44183   | 0.750327  |
| Hgsnat           | 6.00848   | 5.81795     | 0             | 1         | 1         |
| 4930444A02Rik_j4 | 5.45614   | 5.17884     | -0.0752516    | 0.727994  | 0.903627  |
| Fnta_j2          | 35.3613   | 34.038      | 0             | 1         | 1         |
| Fnta             | 20.544    | 17.6933     | 0             | 1         | 1         |
| XLOC_032747      | 0.188797  | 0.0825095   | -1.1942       | 0.363876  | 0.698002  |
| Brf2             | 3.92569   | 4.58607     | 0.224312      | 0.0835427 | 0.352338  |
| Chrna6           | 0.60806   | 0.306337    | 0             | 1         | 1         |
| Chrna6_j1        | 0.227299  | 0.228       | 0             | 1         | 1         |
| Unc5d_j1         | 0.133032  | 9.27E-06    | -13.8083      | 0.970737  | 1         |
| XLOC_032755      | 0.0512513 | 0           | -1.79769e+308 | 0.0714886 | 1         |

|               |           |                 |            |           |           |
|---------------|-----------|-----------------|------------|-----------|-----------|
| XLOC_032755   | 0.110603  | 0.0429049       | -1.36617   | 0.456442  | 1         |
| Mak16         | 6.83002   | 7.2924          | 0.0945044  | 0.487658  | 0.77841   |
| Gm6877        | 2.01287   | 1.79509         | -0.165196  | 0.478875  | 0.773346  |
| Wrn_j1        | 0.682248  | 0.541753        | 0          | 1         | 1         |
| Wrn           | 0.842364  | 0.960783        | 0          | 1         | 1         |
| Ubxn8         | 0.753584  | 0.684899        | -0.137879  | 0.485834  | 0.777375  |
| AK012595      | 7.04118   | 6.71049         | -0.0693973 | 0.736611  | 0.907287  |
| Rbpms         | 0.0474703 | 0 -1.79769e+308 |            | 0.0013815 | 1         |
| Rbpms         | 0.218981  | 0.169771        | -0.367209  | 0.33275   | 0.673866  |
| Dctn6         | 7.322     | 7.62806         | 0          | 1         | 1         |
| Dctn6_j1      | 3.04671   | 2.18892         | 0          | 1         | 1         |
| Leprot1_j4    | 35.2754   | 50.9747         | 0          | 1         | 1         |
| Leprot1       | 8.22079   | 7.84851         | 0          | 1         | 1         |
| B930018H19_j3 | 0.0673731 | 0 -1.79769e+308 |            | 0.0367893 | 1         |
| B930018H19_j4 | 0.120621  | 0.0558677       | -1.11039   | 0.351271  | 1         |
| Tnks_j5       | 0.0781654 | 0               | 0          | 1         | 1         |
| Tnks          | 5.07422   | 3.75717         | 0          | 1         | 1         |
| Eri1_j1       | 0.118902  | 0.163833        | 0.462452   | 0.425961  | 0.74082   |
| Eri1          | 0.285386  | 0.308736        | 0.11346    | 0.746338  | 0.911646  |
| Cldn23        | 0.177435  | 0.316239        | 0.833721   | 0.0578816 | 0.28236   |
| Lonrf1        | 0.509178  | 0.574239        | 0.173481   | 0.379514  | 0.710908  |
| Dlc1          | 2.66498   | 2.00153         | 0          | 1         | 1         |
| Dlc1          | 1.25939   | 0.835962        | 0          | 1         | 1         |
| Sgcj_j1       | 0.177709  | 0 -1.79769e+308 |            | 2.12E-08  | 1.39E-06  |
| Msr1          | 0.183842  | 0.468478        | 1.34952    | 0.0028255 | 0.0328445 |
| Mtmr7_j1      | 0.0636636 | 0.0918637       | 0.529026   | 0.299199  | 1         |
| Mtmr7         | 16.3155   | 15.2989         | -0.0928109 | 0.280795  | 0.629242  |
| Mtus1         | 4.04765   | 4.92076         | 0          | 1         | 1         |
| Mtus1         | 3.47905   | 1.86123         | 0          | 1         | 1         |
| Mtus1         | 5.64926   | 3.36854         | 0          | 1         | 1         |
| Mtus1_j1      | 1.48953   | 1.35271         | 0          | 1         | 1         |
| Fgl1          | 0.59084   | 0.287767        | -1.03786   | 0.0927747 | 0.374764  |
| Asah1_j5      | 7.32398   | 9.60601         | 0          | 1         | 1         |
| Asah1_j6      | 16.0623   | 15.0862         | 0          | 1         | 1         |
| Frg1_j1       | 11.1953   | 10.8717         | 0          | 1         | 1         |
| Cyp4v3        | 3.51617   | 3.47361         | -0.0175695 | 0.903976  | 0.969335  |
| Fam149a       | 8.28557   | 6.55731         | -0.337496  | 0.001984  | 0.0248178 |
| Tlr3_j1       | 0.0652224 | 0 -1.79769e+308 |            | 0.0045606 | 1         |
| Tlr3          | 0.368561  | 0.427686        | 0.214648   | 0.550373  | 0.815351  |
| 1700029J07Rik | 0.275405  | 0.21503         | -0.357021  | 0.489721  | 0.779571  |
| 1700029J07Rik | 0.560168  | 0.335487        | -0.739603  | 0.175747  | 0.514267  |
| Snx25_j2      | 6.5181    | 6.20374         | 0          | 1         | 1         |
| Slc25a4_j1    | 343.62    | 324.981         | 0          | 1         | 1         |
| Slc25a4       | 354.391   | 315.022         | 0          | 1         | 1         |
| Ccdc111       | 1.39117   | 0.880356        | -0.66014   | 0.0058747 | 0.0575644 |
| Stox2_j3      | 0.524026  | 0.341233        | 0          | 1         | 1         |
| Stox2         | 0.860439  | 0.863304        | 0          | 1         | 1         |

|               |           |                 |            |           |           |
|---------------|-----------|-----------------|------------|-----------|-----------|
| D030016E14Rik | 14.5736   | 12.7134         | -0.197001  | 0.0436136 | 0.237298  |
| Gm8623        | 15.2706   | 17.0799         | 0.161542   | 0.316601  | 0.660102  |
| Ing2          | 0.0750089 | 0 -1.79769e+308 |            | 0.030245  | 1         |
| Ing2          | 1.28349   | 1.22534         | -0.0668865 | 0.774836  | 0.923737  |
| Cdkn2aip      | 1.74179   | 1.81639         | 0.0605004  | 0.76404   | 0.918964  |
| Cdkn2aip      | 0.936716  | 0.929218        | -0.0115951 | 0.967316  | 0.990716  |
| Wwc2_j1       | 0.778985  | 0.631128        | 0          | 1         | 1         |
| Wwc2          | 1.29941   | 1.36535         | 0          | 1         | 1         |
| Odz3_j6       | 0.199808  | 0 -1.79769e+308 |            | 9.63E-13  | 1.38E-10  |
| Odz3_j5       | 0.319243  | 0.0506386       | -2.65634   | 3.06E-06  | 0.0001109 |
| Odz3_j4       | 0.490664  | 0.55662         | 0.181957   | 0.43474   | 0.745796  |
| Spcs3         | 3.58132   | 3.0102          | 0          | 1         | 1         |
| Spcs3_j2      | 4.71091   | 4.06193         | 0          | 1         | 1         |
| Wdr17_j10     | 0.248279  | 0.244969        | -0.0193641 | 0.965981  | 0.990266  |
| Wdr17_j9      | 0.146005  | 0 -1.79769e+308 |            | 1.27E-05  | 0.0003803 |
| Sap30         | 1.60604   | 2.12741         | 0.405596   | 0.072819  | 0.324707  |
| Galnt7        | 0.638154  | 0.790139        | 0.308201   | 0.23143   | 0.578473  |
| Galnt7_j1     | 0.0873554 | 0 -1.79769e+308 |            | 0.0010157 | 1         |
| Galntl6_j1    | 0.130595  | 0 -1.79769e+308 |            | 0.0008892 | 1         |
| Galntl6_j3    | 0.0713548 | 0.00562122      | -3.66606   | 0.513195  | 1         |
| Galntl6_j4    | 0.0948231 | 0.0263134       | -1.84944   | 0.142816  | 1         |
| Clcn3_j1      | 15.925    | 15.9698         | 0          | 1         | 1         |
| Clcn3_j3      | 1.20454   | 0.821268        | 0          | 1         | 1         |
| Clcn3         | 3.94681   | 3.68305         | 0          | 1         | 1         |
| Palld_j4      | 1.46978   | 1.75473         | 0          | 1         | 1         |
| Palld         | 0.417203  | 0.449829        | 0          | 1         | 1         |
| Palld_j5      | 0.0662295 | 0               | 0          | 1         | 1         |
| Palld_j3      | 1.60627   | 0.903463        | 0          | 1         | 1         |
| Palld         | 0.372704  | 0.525599        | 0          | 1         | 1         |
| Anxa10        | 0.320257  | 4.68214         | 3.86987    | 0         | 0         |
| Anxa10_j3     | 0.143433  | 0.165264        | 0.204397   | 0.832527  | 0.945929  |
| Tll1          | 0.770654  | 0.409096        | -0.913643  | 2.39E-05  | 0.0006406 |
| Tll1_j2       | 0.161513  | 0 -1.79769e+308 |            | 4.00E-08  | 2.42E-06  |
| Cpe           | 87.4839   | 73.221          | -0.25676   | 0.0035667 | 0.0395363 |
| Sc4mol_j1     | 59.9074   | 52.3867         | 0          | 1         | 1         |
| Sc4mol        | 44.2317   | 45.1209         | 0          | 1         | 1         |
| Klhl2         | 13.0655   | 12.3132         | -0.0855491 | 0.418648  | 0.735429  |
| 1810029B16Rik | 1.67902   | 2.0962          | 0.32016    | 0.0412926 | 0.228575  |
| Gm9755        | 11.7683   | 7.9113          | -0.572918  | 0.0002092 | 0.0039835 |
| Psd3          | 0.682535  | 0.377873        | 0          | 1         | 1         |
| Psd3_j2       | 0         | 0.174449        | 0          | 1         | 1         |
| Csgalnact1    | 0.943533  | 1.62906         | 0          | 1         | 1         |
| Csgalnact1_j4 | 0.48339   | 0.188914        | 0          | 1         | 1         |
| Slc18a1       | 0.750037  | 0.465727        | -0.687478  | 0.0390919 | 0.220578  |
| Slc18a1_j3    | 0.371843  | 0.207768        | -0.839719  | 0.0425031 | 0.233027  |
| Lzts1_j3      | 0.656488  | 0.183459        | 0          | 1         | 1         |
| Lzts1_j1      | 6.01737   | 3.64602         | 0          | 1         | 1         |

|                  |           |             |               |           |          |
|------------------|-----------|-------------|---------------|-----------|----------|
| AK034302_j2      | 0.771072  | 0.859131    | 0             | 1         | 1        |
| AK034302         | 2.54076   | 1.59888     | 0             | 1         | 1        |
| Zfp866           | 0.173614  | 0.0912144   | -0.928551     | 0.0910835 | 0.371031 |
| Ndufa13_j2       | 15.3347   | 15.7941     | 0.0425802     | 0.708811  | 0.893906 |
| Gatad2a_j2       | 0.314589  | 0.0909272   | 0             | 1         | 1        |
| Gatad2a_j4       | 1.97633   | 2.21726     | 0             | 1         | 1        |
| Gatad2a_j3       | 1.01808   | 0.966677    | 0             | 1         | 1        |
| Gatad2a_j5       | 2.3231    | 1.48459     | 0             | 1         | 1        |
| Mau2             | 3.46982   | 3.0651      | 0             | 1         | 1        |
| Mau2_j3          | 6.0684    | 6.50425     | 0             | 1         | 1        |
| Ncan_j2          | 0.169502  | 5.87E-05    | 0             | 1         | 1        |
| Ncan             | 1.03584   | 1.03505     | 0             | 1         | 1        |
| Rfxank           | 3.14863   | 2.90645     | -0.115469     | 0.476905  | 0.772482 |
| Slc25a42         | 3.56335   | 3.02848     | -0.234642     | 0.148602  | 0.477466 |
| Armc6_j3         | 0.924774  | 0.862988    | 0             | 1         | 1        |
| Armc6            | 3.21195   | 4.31818     | 0             | 1         | 1        |
| Ddx49            | 8.93348   | 9.10226     | 0.0270026     | 0.805051  | 0.935568 |
| Upf1             | 0.150748  | 0.131367    | -0.198537     | 0.570167  | 0.826162 |
| Crtc1            | 6.19071   | 4.2014      | 0             | 1         | 1        |
| Klhl26_j3        | 6.45023   | 6.58709     | 0             | 1         | 1        |
| Klhl26           | 3.70476   | 3.81014     | 0             | 1         | 1        |
| Tmem59l_j2       | 15.3189   | 14.5178     | 0             | 1         | 1        |
| Tmem59l          | 69.519    | 49.8347     | 0             | 1         | 1        |
| 2810428l15Rik_j1 | 13.5219   | 13.8319     | 0.0326997     | 0.8633    | 0.956634 |
| 2810428l15Rik    | 31.8994   | 33.3197     | 0.062846      | 0.597574  | 0.840317 |
| 2810428l15Rik_j2 | 1.32908   | 2.79829     | 1.07411       | 0.0206051 | 0.143858 |
| Ssbp4_j7         | 9.3083    | 8.77422     | 0             | 1         | 1        |
| Ssbp4            | 5.79044   | 5.93778     | 0             | 1         | 1        |
| Pgpep1           | 3.19856   | 3.47893     | 0.121224      | 0.348252  | 0.686627 |
| Mpv17l2          | 0.227586  | 0.303842    | 0             | 1         | 1        |
| Mast3_j1         | 0.197691  | 0.144596    | -0.451219     | 0.209156  | 0.553362 |
| Mast3_j2         | 0.430936  | 0.229649    | -0.908044     | 0.0041451 | 0.044054 |
| Arrdc2_j1        | 0.956882  | 1.32486     | 0             | 1         | 1        |
| Arrdc2           | 1.0797    | 0.897784    | 0             | 1         | 1        |
| Arrdc2_j5        | 0.508867  | 0.134231    | 0             | 1         | 1        |
| Kcnn1            | 4.26813   | 3.21207     | 0             | 1         | 1        |
| Kcnn1_j1         | 0.331132  | 0.138707    | 0             | 1         | 1        |
| Ccdc124_j1       | 4.94419   | 7.61582     | 0             | 1         | 1        |
| Ccdc124_j3       | 0.571279  | 0.823192    | 0             | 1         | 1        |
| Slc5a5_j3        | 7.74393   | 6.99157     | 0             | 1         | 1        |
| Gm15427_j1       | 0.0836802 | 0.0349879   | -1.25803      | 0.432477  | 1        |
| Gm15427_j2       | 0         | 0.0878593   | 1.79769e+308  | 0.0527143 | 1        |
| Gm15427_j3       | 0.288856  | 0           | -1.79769e+308 | 9.51E-06  | 0.000297 |
| Haus8_j2         | 0.431517  | 0.000266347 | -10.6619      | 0.819147  | 0.94142  |
| Haus8_j1         | 0.881839  | 0.744186    | -0.244852     | 0.517723  | 0.795965 |
| Haus8            | 4.16194   | 4.74475     | 0.189074      | 0.240071  | 0.587436 |
| Nr2f6            | 3.42987   | 2.97645     | 0             | 1         | 1        |

|                  |           |           |               |           |           |
|------------------|-----------|-----------|---------------|-----------|-----------|
| Ushbp1_j6        | 0.490894  | 0.394644  | -0.314861     | 0.507557  | 0.789728  |
| Ushbp1           | 0.211603  | 0.293791  | 0.473433      | 0.390169  | 0.717194  |
| Ushbp1_j2        | 0.0336592 | 0.0533504 | 0.664497      | 0.546365  | 1         |
| Ushbp1_j8        | 0.162853  | 0.0154339 | -3.39939      | 0.0723297 | 0.323621  |
| Abhd8            | 46.9819   | 41.2842   | -0.186514     | 0.0386369 | 0.218949  |
| Ano8_j1          | 0.251428  | 0.177562  | 0             | 1         | 1         |
| Ano8_j8          | 5.92658   | 5.42276   | 0             | 1         | 1         |
| Plvap            | 1.16611   | 1.22824   | 0.0748909     | 0.597462  | 0.840295  |
| Bst2             | 8.0386    | 12.8127   | 0.67256       | 1.63E-05  | 0.0004695 |
| Tmem221          | 0.226969  | 0.275377  | 0.278914      | 0.636009  | 0.858939  |
| Tmem221_j3       | 0.132495  | 0.0507723 | -1.38383      | 0.397369  | 1         |
| Unc13a_j4        | 3.56485   | 1.15375   | 0             | 1         | 1         |
| Unc13a_j3        | 1.47093   | 0.757153  | 0             | 1         | 1         |
| Fcho1_j2         | 0.142675  | 0.277839  | 0             | 1         | 1         |
| Fcho1            | 0.524682  | 0.0680607 | 0             | 1         | 1         |
| Fcho1_j1         | 2.39989   | 1.78563   | 0             | 1         | 1         |
| Eps15l1_j8       | 2.5315    | 2.79659   | 0             | 1         | 1         |
| Eps15l1_j7       | 8.54082   | 7.66741   | 0             | 1         | 1         |
| Cherp            | 0.523319  | 0.430892  | -0.280365     | 0.349944  | 0.687527  |
| Slc35e1          | 8.27033   | 6.17848   | -0.420692     | 5.87E-05  | 0.0013639 |
| Med26            | 2.11151   | 2.04415   | -0.0467694    | 0.791136  | 0.930371  |
| 9130011J15Rik_j3 | 0.812217  | 0.573391  | -0.502347     | 0.212322  | 0.557306  |
| Large_j2         | 0.320766  | 0.319084  | 0             | 1         | 1         |
| Large            | 1.6728    | 1.51405   | 0             | 1         | 1         |
| Gm7901           | 14.3358   | 17.0374   | 0.249086      | 0.0229525 | 0.154886  |
| Arhgap10         | 1.03519   | 1.05574   | 0.0283638     | 0.901353  | 0.968662  |
| Tmem184c         | 41.8002   | 33.5225   | 0             | 1         | 1         |
| Tmem184c_j1      | 3.80768   | 2.25735   | 0             | 1         | 1         |
| Ednra            | 1.16328   | 0.810919  | -0.520567     | 0.0338336 | 0.201353  |
| Pou4f2           | 0.643102  | 0.467521  | -0.460017     | 0.0856732 | 0.357343  |
| Rbmxrt_j1        | 6.00083   | 2.552     | 0             | 1         | 1         |
| Lsm6_j6          | 2.69226   | 2.83127   | 0.0726339     | 0.658919  | 0.870368  |
| 1700011L22Rik_j3 | 0.3345    | 0.402967  | 0.268657      | 0.554376  | 0.817472  |
| Mmaa_j3          | 0.143374  | 0.0351464 | 0             | 1         | 1         |
| Mmaa_j7          | 0.305693  | 0.190646  | 0             | 1         | 1         |
| Mmaa_j16         | 0.240562  | 0.0831005 | 0             | 1         | 1         |
| Smad1_j3         | 9.49101   | 7.92432   | 0             | 1         | 1         |
| Smad1            | 3.55578   | 4.45463   | 0             | 1         | 1         |
| Abce1            | 10.0843   | 9.08194   | 0             | 1         | 1         |
| Gm5909           | 22.4641   | 23.4136   | 0.0597274     | 0.572049  | 0.827134  |
| Smarca5_j2       | 0         | 0.0972668 | 1.79769e+308  | 0.0992454 | 1         |
| Gab1_j2          | 2.32329   | 0.940679  | 0             | 1         | 1         |
| Gab1             | 0.409965  | 0.103138  | 0             | 1         | 1         |
| Usp38_j2         | 4.50989   | 5.11878   | 0             | 1         | 1         |
| Usp38            | 4.58508   | 3.56416   | 0             | 1         | 1         |
| Il15_j3          | 0.273291  | 0.147794  | -0.88685      | 1         | 1         |
| Zfp330_j1        | 1.01168   | 0         | -1.79769e+308 | 7.84E-08  | 4.36E-06  |

|               |           |            |               |           |           |
|---------------|-----------|------------|---------------|-----------|-----------|
| Zfp330_j7     | 0.0472707 | 0          | -1.79769e+308 | 0.193921  | 1         |
| Elmod2        | 5.185     | 4.74088    | -0.12919      | 0.310995  | 0.655811  |
| Scoc_j3       | 1.55192   | 0.592717   | 0             | 1         | 1         |
| Scoc          | 39.4926   | 42.211     | 0             | 1         | 1         |
| Scoc_j4       | 0.19089   | 0.0188709  | 0             | 1         | 1         |
| Tecr_j1       | 113.197   | 129.392    | 0             | 1         | 1         |
| Tecr_j8       | 44.0086   | 51.1315    | 0             | 1         | 1         |
| Tecr          | 12.0913   | 20.2821    | 0             | 1         | 1         |
| Pkn1_j1       | 5.67665   | 4.93318    | 0             | 1         | 1         |
| Cd97          | 0.182354  | 0.00500628 | -5.18686      | 0.0114674 | 0.094775  |
| AK134933_j4   | 0.113121  | 0          | -1.79769e+308 | 0.0298688 | 1         |
| AK008705_j1   | 0.428331  | 0.229219   | -0.902001     | 0.129911  | 0.448911  |
| AK008705      | 0.998375  | 0.514405   | -0.956678     | 0.0064867 | 0.0621152 |
| AK008705_j2   | 0.388844  | 0.274709   | -0.501285     | 0.422727  | 0.738516  |
| Dcaf15_j5     | 0.358908  | 0.0327739  | -3.45299      | 0.0009472 | 0.0136887 |
| Dcaf15_j10    | 0.132408  | 0          | -1.79769e+308 | 0.0151642 | 1         |
| Cc2d1a_j1     | 5.77633   | 6.13462    | 0             | 1         | 1         |
| Cc2d1a        | 4.89251   | 4.71184    | 0             | 1         | 1         |
| Nanos3_j2     | 0.364297  | 0.182399   | -0.998019     | 0.266377  | 0.615515  |
| Zswim4        | 1.375     | 1.58801    | 0             | 1         | 1         |
| Mri1_j1       | 17.2792   | 23.7851    | 0             | 1         | 1         |
| Mri1_j3       | 8.47      | 7.41683    | 0             | 1         | 1         |
| Ccdc130       | 2.91991   | 3.03522    | 0.0558772     | 0.762868  | 0.918329  |
| Ier2          | 2.8859    | 3.33611    | 0.209144      | 0.223838  | 0.571034  |
| Nacc1_j2      | 0.659809  | 0.570011   | 0             | 1         | 1         |
| Nfix_j4       | 0.286831  | 0.121386   | -1.2406       | 0.0014681 | 0.0194035 |
| Calr          | 135.147   | 155.759    | 0.20478       | 0.0167326 | 0.124426  |
| Gcdh_j2       | 0.292955  | 0.241276   | 0             | 1         | 1         |
| Gcdh          | 3.19976   | 2.39885    | 0             | 1         | 1         |
| Mast1_j1      | 30.095    | 35.754     | 0             | 1         | 1         |
| Mast1         | 49.3697   | 43.1988    | 0             | 1         | 1         |
| Mast1_j2      | 5.35702   | 3.44987    | 0             | 1         | 1         |
| Rnaseh2a_j1   | 2.52091   | 2.29988    | 0             | 1         | 1         |
| Asna1         | 45.3799   | 45.4243    | 0.00140866    | 0.988078  | 0.996422  |
| Wdr83_j2      | 0.944825  | 0.772476   | -0.290557     | 0.188949  | 0.530559  |
| Vps35_j1      | 4.11761   | 1.38978    | -1.56695      | 4.05E-11  | 4.46E-09  |
| Vps35         | 1.18291   | 1.03346    | -0.194861     | 0.231684  | 0.578783  |
| 4921524J17Rik | 0.616197  | 0.338351   | -0.864873     | 0.188537  | 0.530139  |
| 4921524J17Rik | 3.13785   | 2.76844    | -0.1807       | 0.434322  | 0.74545   |
| Dnaja2        | 58.5023   | 57.6804    | -0.0204125    | 0.813031  | 0.938881  |
| Neto2_j1      | 0.660921  | 0.732919   | 0             | 1         | 1         |
| Neto2         | 1.22736   | 0.525806   | 0             | 1         | 1         |
| Itfg1         | 34.7036   | 29.2405    | 0             | 1         | 1         |
| Itfg1_j2      | 8.29069   | 8.78111    | 0             | 1         | 1         |
| Siah1a_j1     | 1.96951   | 1.81545    | -0.11751      | 0.681216  | 0.880213  |
| Siah1a        | 1.37451   | 1.11751    | -0.298635     | 0.161142  | 0.496039  |
| N4bp1_j3      | 1.60602   | 1.63683    | 0             | 1         | 1         |

|             |           |                 |             |           |           |
|-------------|-----------|-----------------|-------------|-----------|-----------|
| N4bp1_j2    | 0.0907992 | 0.0235961       | 0           | 1         | 1         |
| N4bp1_j1    | 0.216275  | 0.0267098       | 0           | 1         | 1         |
| Cbln1       | 1.16904   | 1.35959         | 0.217846    | 0.333356  | 0.674392  |
| Zfp423_j4   | 0.980148  | 0.000303748     | 0           | 1         | 1         |
| Zfp423_j5   | 0.549637  | 0.347542        | 0           | 1         | 1         |
| Zfp423      | 0.972355  | 0.67903         | 0           | 1         | 1         |
| Brd7        | 0.791167  | 0.859807        | 0.12003     | 0.526603  | 0.801166  |
| Brd7_j2     | 1.42237   | 1.41863         | -0.00379985 | 0.989268  | 0.996615  |
| Tox3_j2     | 0.813115  | 0.662117        | 0           | 1         | 1         |
| XLOC_032955 | 0.260957  | 0.207836        | -0.328366   | 0.740991  | 0.909195  |
| Aktip       | 10.7504   | 11.3947         | 0           | 1         | 1         |
| Irx3        | 0.933511  | 0.783122        | -0.25343    | 0.292408  | 0.639388  |
| Gm16615_j1  | 0.282691  | 0.22185         | -0.349642   | 0.445186  | 0.752854  |
| Amfr        | 0.180066  | 0.377951        | 0           | 1         | 1         |
| Nudt21_j2   | 1.64065   | 0.346958        | 0           | 1         | 1         |
| Bbs2_j3     | 1.46625   | 1.63379         | 0           | 1         | 1         |
| Bbs2        | 2.99513   | 2.2622          | 0           | 1         | 1         |
| Fam192a_j3  | 0.902228  | 0.877548        | 0           | 1         | 1         |
| Fam192a     | 9.50643   | 9.28364         | 0           | 1         | 1         |
| Pllp        | 1.93323   | 2.48515         | 0           | 1         | 1         |
| Ciapi1      | 5.73465   | 7.04595         | 0           | 1         | 1         |
| Dok4_j1     | 98.6739   | 86.4232         | 0           | 1         | 1         |
| Dok4        | 27.8122   | 22.0578         | 0           | 1         | 1         |
| Ccdc102a_j1 | 1.29729   | 0.768577        | -0.755236   | 0.0675316 | 0.310965  |
| Ccdc102a_j4 | 0.89372   | 0.691614        | -0.369855   | 0.140996  | 0.466982  |
| Ccdc102a    | 0.77241   | 0.636983        | -0.278113   | 0.43579   | 0.746551  |
| Kifc3       | 0.636285  | 0.535804        | -0.247968   | 0.28039   | 0.629067  |
| Zfp319_j1   | 0.248736  | 0.476155        | 0           | 1         | 1         |
| Zfp319      | 1.22853   | 0.97038         | 0           | 1         | 1         |
| Gtl3_j2     | 5.18656   | 6.37709         | 0           | 1         | 1         |
| Gtl3        | 5.73166   | 5.46043         | 0           | 1         | 1         |
| Csnk2a2     | 12.3431   | 13.4307         | 0.121837    | 0.360584  | 0.695475  |
| XLOC_032981 | 0.153453  | 0 -1.79769e+308 |             | 0.0048834 | 0.0498247 |
| Cnot1_j2    | 0.0677482 | 0               | 0           | 1         | 1         |
| Cnot1_j3    | 0.111925  | 0.157211        | 0           | 1         | 1         |
| Slc38a7     | 9.54625   | 9.83026         | 0           | 1         | 1         |
| Got2_j5     | 1.02723   | 1.05898         | 0           | 1         | 1         |
| Got2        | 17.659    | 18.0509         | 0           | 1         | 1         |
| Gm5913      | 0.282137  | 0 -1.79769e+308 |             | 5.45E-05  | 0.0012835 |
| Cdh8_j1     | 0.360327  | 0.0999477       | 0           | 1         | 1         |
| Cdh11_j4    | 0.0969807 | 0.0436771       | 0           | 1         | 1         |
| Cdh11       | 0.86912   | 0.632534        | 0           | 1         | 1         |
| Gm8730      | 123.8     | 138.33          | 0.160103    | 0.0650355 | 0.303642  |
| XLOC_032992 | 0.0919471 | 0.0286842       | -1.68055    | 0.304881  | 1         |
| XLOC_032992 | 0.140303  | 4.97E-06        | -14.7856    | 0.996065  | 0.998914  |
| XLOC_032992 | 0.256934  | 0.162114        | -0.664385   | 0.525405  | 0.800757  |
| Cmtm4       | 5.37997   | 4.01887         | -0.420808   | 0.0001315 | 0.0027009 |



|                  |           |                 |            |           |           |
|------------------|-----------|-----------------|------------|-----------|-----------|
| Dync1li2         | 24.6581   | 21.5428         | 0          | 1         | 1         |
| Nae1             | 18.1626   | 17.6167         | -0.0440294 | 0.665234  | 0.873092  |
| Fam96b           | 5.6003    | 6.35976         | 0.18347    | 0.373424  | 0.706279  |
| Fam96b_j1        | 10.8579   | 10.3565         | -0.0682146 | 0.660805  | 0.871365  |
| B3gnt9-ps_j1     | 0.166866  | 0.138767        | -0.266022  | 0.485955  | 0.777391  |
| Tradd_j3         | 3.60572   | 2.98574         | 0          | 1         | 1         |
| Kctd19           | 0.190857  | 0.130334        | -0.550276  | 0.317194  | 0.66048   |
| Tppp3_j1         | 971.563   | 1048.81         | 0.110379   | 0.230107  | 0.57715   |
| Acd_j1           | 0.183523  | 0.265988        | 0          | 1         | 1         |
| Gfod2            | 10.6141   | 12.4368         | 0.228627   | 0.0649296 | 0.303264  |
| Gfod2_j1         | 2.03888   | 2.09383         | 0.0383708  | 0.877177  | 0.96086   |
| Ctrl_j2          | 0.114541  | 0.0837316       | -0.452026  | 0.677293  | 1         |
| Psmb10_j7        | 2.89895   | 2.35193         | -0.301683  | 0.183474  | 0.524089  |
| Slc12a4_j5       | 0.617035  | 0.517326        | -0.254279  | 0.440273  | 0.749566  |
| Slc12a4_j3       | 2.87176   | 2.16161         | -0.409827  | 0.0096198 | 0.0832762 |
| Smpd3            | 0.133204  | 0.454416        | 1.77037    | 1.80E-05  | 0.0005095 |
| Chtf8            | 15.5711   | 17.2934         | 0          | 1         | 1         |
| Cog8_j1          | 0.885287  | 1.5318          | 0.791014   | 1.37E-07  | 7.08E-06  |
| Cog8_j2          | 3.87079   | 3.57619         | -0.114205  | 0.232282  | 0.579355  |
| Terf2_j2         | 0.0511175 | 0.141191        | 0          | 1         | 1         |
| Terf2_j1         | 3.05299   | 2.64026         | 0          | 1         | 1         |
| Nqo1             | 3.44369   | 2.9519          | -0.222309  | 0.175542  | 0.514061  |
| Nqo1_j1          | 0.730181  | 0.50451         | -0.53337   | 0.215727  | 0.561549  |
| Nob1             | 7.43042   | 8.92522         | 0.264444   | 0.057148  | 0.280101  |
| Rps26-ps1        | 169.948   | 208.906         | 0.297763   | 0.0013621 | 0.0183251 |
| Psm7             | 47.0537   | 44.434          | 0          | 1         | 1         |
| AK042944_j2      | 0.516427  | 0.262365        | -0.976989  | 0.0236939 | 0.15827   |
| AK042944         | 1.2136    | 0.917067        | -0.404191  | 0.143561  | 0.470705  |
| Gm1943           | 6.71108   | 7.5587          | 0.171592   | 0.275419  | 0.624497  |
| Dhx38            | 2.47368   | 2.35093         | 0          | 1         | 1         |
| Dhx38_j2         | 1.42604   | 1.35372         | 0          | 1         | 1         |
| Hp               | 0.13482   | 0.216651        | 0.684333   | 0.382166  | 0.712302  |
| Dhodh            | 3.0787    | 2.69386         | 0          | 1         | 1         |
| Dhodh_j2         | 0.925328  | 1.1239          | 0          | 1         | 1         |
| 2400003C14Rik_j1 | 7.17056   | 7.64629         | 0          | 1         | 1         |
| 2400003C14Rik    | 7.00135   | 7.16896         | 0          | 1         | 1         |
| Atxn1l_j2        | 0.233925  | 0.152804        | 0          | 1         | 1         |
| Atxn1l           | 1.57462   | 0.539861        | 0          | 1         | 1         |
| Atxn1l           | 1.02869   | 0.872541        | 0          | 1         | 1         |
| Marveld3         | 0.217753  | 0.197806        | -0.138609  | 0.830866  | 0.945436  |
| Marveld3         | 0.462668  | 0.298888        | -0.630372  | 0.128753  | 0.447154  |
| Calb2            | 12.2292   | 4.45579         | -1.45658   | 0         | 0         |
| Il34_j1          | 0.102739  | 0.429386        | 0          | 1         | 1         |
| Sf3b3            | 10.8897   | 12.7789         | 0.2308     | 0.0188232 | 0.135304  |
| Fuk              | 2.14491   | 1.72091         | -0.317746  | 0.0287425 | 0.180466  |
| Ddx19b           | 4.63016   | 4.16925         | 0          | 1         | 1         |
| Mrc1_j2          | 0.0637632 | 0 -1.79769e+308 | 0.0286629  |           | 1         |

|                  |           |                 |           |           |           |
|------------------|-----------|-----------------|-----------|-----------|-----------|
| Mrc1_j6          | 0.182916  | 0.307114        | 0.747588  | 0.211435  | 0.556171  |
| AK020517_j1      | 0.322223  | 0.429972        | 0         | 1         | 1         |
| Glg1             | 13.103    | 9.39831         | 0         | 1         | 1         |
| Rfwd3_j2         | 0.109036  | 0.047488        | -1.19916  | 0.338819  | 1         |
| Mkl_j1           | 0.275265  | 0.163222        | -0.75399  | 0.231603  | 0.578702  |
| Mkl_j2           | 0.0228734 | 0.0665041       | 1.53977   | 0.287996  | 1         |
| Fa2h             | 1.77485   | 2.50011         | 0.494294  | 0.0146709 | 0.113117  |
| Wdr59            | 3.66705   | 3.31776         | 0         | 1         | 1         |
| Ldhd             | 4.05365   | 3.97855         | 0         | 1         | 1         |
| Bcar1            | 3.34598   | 2.34565         | 0         | 1         | 1         |
| Bcar1            | 8.81137   | 7.24393         | 0         | 1         | 1         |
| Cfdp1            | 46.0202   | 51.165          | 0.15289   | 0.10864   | 0.409839  |
| Chst5            | 1.17012   | 1.07247         | -0.125726 | 0.640634  | 0.861195  |
| Tmem231_j3       | 1.42425   | 0.937751        | 0         | 1         | 1         |
| Tmem231          | 2.65076   | 2.73364         | 0         | 1         | 1         |
| Adat1            | 0.676731  | 0.537824        | -0.331447 | 0.28055   | 0.629156  |
| Kars             | 3.48676   | 3.9456          | 0.178355  | 0.281854  | 0.630397  |
| Kars             | 1.33954   | 1.52172         | 0.183964  | 0.433691  | 0.744965  |
| Maf              | 5.72379   | 5.11248         | -0.162948 | 0.255837  | 0.604593  |
| Cdyl2            | 1.17134   | 1.24326         | 0.0859707 | 0.61132   | 0.846879  |
| 2310061C15Rik    | 3.56623   | 2.58174         | -0.466057 | 0.0011997 | 0.0165463 |
| Gcsh_j3          | 0.537184  | 0.316205        | 0         | 1         | 1         |
| Gcsh             | 15.4392   | 16.0477         | 0         | 1         | 1         |
| Pkd1l2_j14       | 0.0684472 | 0.0118078       | -2.53525  | 0.317896  | 1         |
| Pkd1l2_j15       | 0.372012  | 0 -1.79769e+308 |           | 7.56E-08  | 4.23E-06  |
| Pkd1l2_j23       | 0.262022  | 0 -1.79769e+308 |           | 0.0155557 | 0.117796  |
| Sdr42e1_j2       | 0.573119  | 0.635366        | 0.148754  | 0.671325  | 0.875757  |
| Sdr42e1          | 0.9909    | 1.02223         | 0.0449132 | 0.868225  | 0.958254  |
| Mlycd            | 1.23208   | 0.950018        | -0.375071 | 0.184978  | 0.525175  |
| Mbtps1_j1        | 2.12514   | 2.65093         | 0         | 1         | 1         |
| Mbtps1_j2        | 2.53799   | 3.10121         | 0         | 1         | 1         |
| Mbtps1           | 5.59597   | 4.44165         | 0         | 1         | 1         |
| Hsd1_j3          | 3.22273   | 1.59744         | 0         | 1         | 1         |
| Hsd1_j4          | 0.276006  | 0.000491464     | 0         | 1         | 1         |
| Hsd1             | 26.5434   | 22.8159         | 0         | 1         | 1         |
| Taf1c_j3         | 0.0646445 | 0 -1.79769e+308 |           | 0.0153125 | 1         |
| Taf1c            | 2.3391    | 2.37913         | 0.02448   | 0.889868  | 0.965024  |
| Kcng4            | 0.768142  | 0.384642        | -0.997855 | 0.0050521 | 0.0510969 |
| 4632415K11Rik_j1 | 2.01927   | 1.84136         | 0         | 1         | 1         |
| 4632415K11Rik    | 3.61987   | 3.77044         | 0         | 1         | 1         |
| Cot1             | 26.7081   | 28.6982         | 0.103681  | 0.304505  | 0.650023  |
| Fam92b_j1        | 0.339328  | 0.0289862       | -3.54924  | 0.0003744 | 0.0064223 |
| AK039624_j1      | 0.0563268 | 0.0156822       | 0         | 1         | 1         |
| AK039624_j2      | 2.45636   | 1.81434         | 0         | 1         | 1         |
| Gins2            | 3.18835   | 3.39818         | 0.0919492 | 0.554145  | 0.817354  |
| XLOC_033092      | 0.17853   | 0.113089        | -0.658711 | 0.365204  | 0.699035  |
| 1190005I06Rik_j1 | 0.788948  | 0 -1.79769e+308 |           | 0.000116  | 0.0024361 |

|                  |           |                 |            |           |           |
|------------------|-----------|-----------------|------------|-----------|-----------|
| 1190005I06Rik    | 2.59552   | 2.33861         | -0.15037   | 0.605905  | 0.844806  |
| Cox4nb           | 7.02155   | 7.02263         | 0          | 1         | 1         |
| AK087264_j7      | 0.0514013 | 0 -1.79769e+308 |            | 0.0199288 | 1         |
| AK087264_j6      | 0.0719149 | 0.0358799       | -1.00312   | 0.392836  | 1         |
| Mthfsd_j5        | 8.84575   | 7.98786         | 0          | 1         | 1         |
| Mthfsd_j7        | 0.232636  | 0               | 0          | 1         | 1         |
| Fbxo31_j1        | 4.61245   | 0.662583        | 0          | 1         | 1         |
| Fbxo31           | 37.3336   | 24.9317         | 0          | 1         | 1         |
| Zcchc14_j1       | 2.66924   | 3.0086          | 0          | 1         | 1         |
| Zcchc14_j3       | 0.0828552 | 0.000258921     | 0          | 1         | 1         |
| Zcchc14          | 0.614097  | 0.220878        | 0          | 1         | 1         |
| Klhdc4           | 5.50515   | 5.51344         | 0.00217043 | 0.988617  | 0.996598  |
| Slc7a5           | 9.65639   | 10.9232         | 0          | 1         | 1         |
| Cyba             | 3.25852   | 5.88705         | 0.853328   | 1.89E-05  | 0.0005316 |
| Mvd              | 32.4945   | 35.9019         | 0.143863   | 0.134253  | 0.456007  |
| Rnf166_j1        | 0.64656   | 1.36122         | 1.07404    | 0.0056062 | 0.0554282 |
| Rnf166           | 6.90189   | 6.46469         | -0.0944089 | 0.523003  | 0.799177  |
| Fam38a_j9        | 0.146174  | 0.0266972       | -2.45292   | 0.225586  | 0.572642  |
| Fam38a_j11       | 0.0739176 | 0.136915        | 0.889292   | 0.478645  | 1         |
| Fam38a_j12       | 0.112874  | 0.148862        | 0.399263   | 0.659901  | 1         |
| Aprt             | 21.8664   | 32.7507         | 0.582812   | 1.46E-06  | 5.76E-05  |
| Galns            | 0.137962  | 0.133503        | -0.0473937 | 0.955281  | 0.987125  |
| Galns            | 1.19378   | 1.35441         | 0.182127   | 0.446399  | 0.753343  |
| Cbfa2t3          | 0.241812  | 0.271944        | 0.169425   | 0.607004  | 0.845186  |
| Cbfa2t3_j3       | 1.28417   | 1.14371         | -0.167113  | 0.46236   | 0.763237  |
| Cbfa2t3_j4       | 0.237683  | 0.117771        | -1.01306   | 0.0887302 | 0.365059  |
| AK032654_j4      | 0.110777  | 0 -1.79769e+308 |            | 0.0057226 | 1         |
| Ankrd11          | 12.496    | 12.6067         | 0          | 1         | 1         |
| Ankrd11_j3       | 0.157049  | 0.144575        | 0          | 1         | 1         |
| Chmp1a           | 14.4619   | 14.8761         | 0.0407321  | 0.658115  | 0.869911  |
| Spata2L          | 0.763141  | 0.876187        | 0          | 1         | 1         |
| Spata2L          | 0.569408  | 0.483259        | 0          | 1         | 1         |
| 1300018I17Rik    | 9.33696   | 9.53611         | 0.0304478  | 0.799755  | 0.933125  |
| 1300018I17Rik_j1 | 0.802138  | 0.178457        | -2.16828   | 0.000289  | 0.0051804 |
| Fanca_j3         | 0.548028  | 0.442384        | -0.30895   | 0.287268  | 0.635532  |
| Dbn1dd1          | 2.51575   | 2.24434         | 0          | 1         | 1         |
| XLOC_033123      | 0.132919  | 0.0614827       | -1.11229   | 0.486394  | 1         |
| XLOC_033123      | 0.155871  | 0 -1.79769e+308 |            | 0.0507124 | 0.260788  |
| Nup133           | 2.6309    | 2.41073         | 0          | 1         | 1         |
| Abcb10           | 3.69854   | 3.39898         | 0          | 1         | 1         |
| Taf5l            | 4.58737   | 4.85436         | 0          | 1         | 1         |
| Pgbd5            | 10.7545   | 9.26563         | 0          | 1         | 1         |
| Agt              | 0.63607   | 0.644327        | 0          | 1         | 1         |
| Agt_j1           | 1.27364   | 0.892973        | 0          | 1         | 1         |
| 2310022B05Rik    | 6.68865   | 5.22993         | 0          | 1         | 1         |
| Fam89a           | 19.8835   | 21.0246         | 0          | 1         | 1         |
| 2810004N23Rik    | 5.12869   | 5.73564         | 0.161363   | 0.166467  | 0.502925  |

|                  |             |           |            |           |           |
|------------------|-------------|-----------|------------|-----------|-----------|
| Egln1            | 10.9378     | 10.0384   | 0          | 1         | 1         |
| Sipa1l2_j1       | 3.015       | 4.02235   | 0.415881   | 0.0526427 | 0.266489  |
| Sipa1l2          | 2.26336     | 1.80922   | -0.323096  | 0.0325457 | 0.196107  |
| Pcnxl2_j6        | 5.28235     | 5.62749   | 0          | 1         | 1         |
| Pcnxl2_j2        | 1.37061     | 0.509589  | 0          | 1         | 1         |
| Pcnxl2           | 3.01547     | 2.31289   | 0          | 1         | 1         |
| Irf2bp2          | 3.56512     | 3.54833   | 0          | 1         | 1         |
| Rbm34            | 3.23687     | 2.19585   | 0          | 1         | 1         |
| Pnpla6_j8        | 0.538255    | 1.62494   | 0          | 1         | 1         |
| 2900053A13Rik_j5 | 2.59591     | 1.92972   | 0          | 1         | 1         |
| Stxbp2           | 0.367453    | 0.391056  | 0          | 1         | 1         |
| Stxbp2           | 0.327308    | 0.365729  | 0          | 1         | 1         |
| Stxbp2_j4        | 0.814042    | 0.528952  | 0          | 1         | 1         |
| XLOC_032144      | 0.0802524   | 0.323242  | 2.01       | 0.0038439 | 0.0416841 |
| Evi5l_j3         | 4.38723     | 5.42736   | 0          | 1         | 1         |
| Evi5l_j8         | 0.459945    | 0.405413  | 0          | 1         | 1         |
| Map2k7_j8        | 3.92439     | 4.29509   | 0.13022    | 0.331559  | 0.673024  |
| Snpc2_j1         | 7.54193     | 10.5041   | 0          | 1         | 1         |
| Lass4_j3         | 6.72606     | 7.6973    | 0          | 1         | 1         |
| Abhd13           | 0.634252    | 0.40748   | 0          | 1         | 1         |
| Myo16_j3         | 0.527682    | 0.748253  | 0.503858   | 0.0540039 | 0.270834  |
| Myo16_j4         | 0.343855    | 0.704132  | 1.03405    | 0.0651447 | 0.303974  |
| Carkd            | 10.5604     | 9.83072   | 0          | 1         | 1         |
| Arhgef7_j1       | 2.50263     | 2.73086   | 0.125914   | 0.459911  | 0.761686  |
| Mcf2l_j4         | 5.82168     | 5.10652   | -0.189094  | 0.126268  | 0.442495  |
| Mcf2l_j5         | 3.49677     | 3.01139   | -0.215593  | 0.185652  | 0.525938  |
| Cul4a            | 0           | 0.864381  | 0          | 1         | 1         |
| Cul4a_j2         | 10.4869     | 10.4233   | 0          | 1         | 1         |
| Cul4a_j4         | 4.62086     | 6.19046   | 0          | 1         | 1         |
| Upf3a_j2         | 1.93893     | 2.00436   | 0.0478856  | 0.909024  | 0.971253  |
| Fbxo25_j3        | 9.85255     | 10.0338   | 0.0262959  | 0.864853  | 0.956985  |
| Cln8_j1          | 0.000891436 | 1.41135   | 0          | 1         | 1         |
| Arhgef10_j7      | 0.0850515   | 0         | 0          | 1         | 1         |
| Kbtbd11          | 1.19084     | 0.65054   | 0          | 1         | 1         |
| XLOC_032187      | 0.1704      | 0.13327   | -0.354579  | 0.713627  | 0.896209  |
| XLOC_032189      | 0.0701254   | 0.0662594 | -0.0818131 | 0.942654  | 1         |
| Mcp1_j4          | 1.12568     | 1.23229   | 0.130535   | 0.668459  | 0.874474  |
| XLOC_032199      | 1.24534     | 1.40291   | 0.171886   | 0.752657  | 0.914482  |
| Thsd1_j3         | 0.102384    | 0.115947  | 0.179474   | 0.804908  | 1         |
| Thsd1            | 0.913409    | 1.04963   | 0.200553   | 0.391834  | 0.718161  |
| Mrps31_j1        | 4.41178     | 4.41169   | -2.88E-05  | 0.999823  | 0.999918  |
| Myst3_j1         | 0.466571    | 0.308692  | 0          | 1         | 1         |
| Myst3_j4         | 1.59913     | 1.43063   | 0          | 1         | 1         |
| Ank1_j3          | 0.647579    | 0.550191  | 0          | 1         | 1         |
| Ank1_j5          | 3.6476      | 6.0564    | 0          | 1         | 1         |
| Ank1_j11         | 1.73034     | 2.15839   | 0          | 1         | 1         |
| Fgfr1            | 12.2782     | 9.73059   | 0          | 1         | 1         |

|                    |           |           |               |           |          |
|--------------------|-----------|-----------|---------------|-----------|----------|
| Whsc1l1_j3         | 1.53538   | 1.85718   | 0.274522      | 0.19241   | 0.534598 |
| Whsc1l1_j11        | 1.93174   | 2.05843   | 0.0916386     | 0.571991  | 0.827134 |
| Ppapdc1b           | 1.75122   | 1.92215   | 0.134359      | 0.459392  | 0.761406 |
| ENSMUSG00000054427 | 0.861228  | 0.899603  | 0.0628943     | 0.829162  | 0.944887 |
| Lsm1               | 14.9028   | 15.0163   | 0.010949      | 0.931872  | 0.979283 |
| Prosc              | 1.35024   | 1.17801   | -0.196855     | 0.653449  | 0.867469 |
| Chrn3_j4           | 0.247257  | 0.113729  | 0             | 1         | 1        |
| BC019943_j2        | 0.744858  | 0.961546  | 0.36839       | 0.106992  | 0.406455 |
| Fut10_j1           | 0.0272704 | 0.205965  | 2.91699       | 0.0089265 | 0.078672 |
| XLOC_032244        | 0         | 0.0964312 | 1.79769e+308  | 0.0579415 | 1        |
| Tmem66             | 52.114    | 59.2199   | 0             | 1         | 1        |
| Dusp4_j1           | 0.437849  | 0.326921  | 0             | 1         | 1        |
| Dusp4_j3           | 0         | 0.406511  | 0             | 1         | 1        |
| XLOC_032260        | 0.722702  | 0.531127  | -0.444345     | 0.459173  | 0.761406 |
| XLOC_032261        | 0.0347548 | 0.118739  | 1.77251       | 0.199251  | 1        |
| Kiaa1456_j3        | 0.711072  | 0.603802  | -0.235919     | 0.364127  | 0.698291 |
| AI429214           | 0.827103  | 0.893855  | 0.111973      | 0.648258  | 0.864551 |
| Tusc3_j5           | 13.5299   | 9.04269   | 0             | 1         | 1        |
| Tusc3_j1           | 3.14888   | 1.91659   | 0             | 1         | 1        |
| AK080223_j1        | 0.286353  | 0.11765   | -1.28329      | 0.307759  | 0.652771 |
| Slc7a2_j3          | 1.85428   | 2.18357   | 0             | 1         | 1        |
| Fat1_j4            | 0.474547  | 0.514559  | 0.116787      | 0.6617    | 0.871766 |
| Sorbs2_j8          | 0.269491  | 0.404021  | 0             | 1         | 1        |
| Sorbs2_j16         | 0.476512  | 0.424885  | 0             | 1         | 1        |
| Ufsp2              | 24.9085   | 22.8551   | -0.124125     | 0.257364  | 0.606261 |
| Acs1_j2            | 0.99264   | 2.53179   | 0             | 1         | 1        |
| Irf2_j2            | 0.378147  | 0.490989  | 0.376742      | 0.50793   | 0.789986 |
| Rwdd4a_j1          | 0.0204203 | 0.154107  | 2.91586       | 0.0486734 | 1        |
| Dctd               | 0         | 0.209228  | 1.79769e+308  | 0.002292  | 0.027803 |
| Gpm6a              | 2.5015    | 1.17067   | 0             | 1         | 1        |
| Hpgd_j3            | 0.776915  | 0.80255   | 0.0468345     | 0.921472  | 0.975376 |
| AK141659           | 0.156582  | 0.162155  | 0.0504543     | 0.933125  | 0.979673 |
| AK141659_j5        | 0.152288  | 0         | -1.79769e+308 | 0.0454047 | 0.243949 |
| 2700029M09Rik_j1   | 1.04115   | 1.00572   | -0.0499493    | 0.926881  | 0.977384 |
| Nek1_j3            | 0.649923  | 0         | 0             | 1         | 1        |
| Nek1_j5            | 0.544949  | 0.625572  | 0             | 1         | 1        |
| Ddx60_j6           | 0         | 0.0999328 | 1.79769e+308  | 0.0966687 | 1        |
| March1_j1          | 0.0809542 | 0.10609   | 0.39011       | 0.753827  | 1        |
| Ints10_j6          | 0.375133  | 0.269515  | 0             | 1         | 1        |
| Atp13a1            | 1.86918   | 1.95792   | 0             | 1         | 1        |
| Gmip_j1            | 4.04E-05  | 0.298966  | 12.8531       | 0.905486  | 0.969961 |
| Gmip_j6            | 0.416577  | 0.675175  | 0.696678      | 0.0762073 | 0.333558 |
| Lpar2_j2           | 0.0726525 | 0         | -1.79769e+308 | 0.0085933 | 1        |
| Tm6sf2_j12         | 0.158252  | 0.289639  | 0             | 1         | 1        |
| Hapln4_j2          | 6.07063   | 3.93885   | 0             | 1         | 1        |
| Nr2c2ap_j2         | 5.22005   | 8.17066   | 0.646388      | 0.0003378 | 0.005888 |
| Sugp2_j6           | 0.174687  | 0.525959  | 0             | 1         | 1        |

|             |           |           |               |           |           |
|-------------|-----------|-----------|---------------|-----------|-----------|
| Sugp2       | 2.22713   | 1.90532   | 0             | 1         | 1         |
| Sugp2_j8    | 1.64242   | 1.80644   | 0             | 1         | 1         |
| Lass1_j1    | 8.35725   | 7.38638   | -0.17816      | 0.200951  | 0.544315  |
| Comp        | 4.15374   | 4.22519   | 0             | 1         | 1         |
| Crlf1_j2    | 1.49299   | 1.72144   | 0.205411      | 0.254313  | 0.602656  |
| Crlf1_j4    | 0.340182  | 1.70942   | 2.32913       | 4.86E-08  | 2.87E-06  |
| Isyna1_j3   | 0.386808  | 0.642052  | 0.731071      | 0.116533  | 0.424567  |
| XLOC_032353 | 0.203279  | 0.165613  | -0.295647     | 0.668079  | 0.874424  |
| Pde4c_j14   | 0.230313  | 0.207792  | -0.148457     | 0.850255  | 0.952363  |
| Pde4c_j20   | 0         | 0.388986  | 1.79769e+308  | 0.0019096 | 0.0240817 |
| Myo9b_j6    | 0.021354  | 0.0893968 | 2.06571       | 0.0248547 | 1         |
| Myo9b_j9    | 0.875347  | 0.807383  | -0.116601     | 0.671554  | 0.875915  |
| XLOC_032364 | 0.0780618 | 0.039292  | -0.990381     | 0.648468  | 1         |
| Dda1        | 8.74568   | 9.73333   | 0             | 1         | 1         |
| Gtpbp3_j2   | 1.57197   | 1.1796    | -0.41428      | 0.107165  | 0.406827  |
| Fam125a_j1  | 0         | 0.0749047 | 1.79769e+308  | 0.178982  | 1         |
| Slc27a1_j1  | 0.206669  | 0         | -1.79769e+308 | 0.0008009 | 0.0119976 |
| Slc27a1_j13 | 4.04924   | 3.77336   | -0.101804     | 0.576052  | 0.828686  |
| Jak3_j7     | 0.099978  | 0.372776  | 1.89863       | 6.94E-05  | 0.0015737 |
| Jak3_j13    | 0.0500383 | 0         | -1.79769e+308 | 0.0339895 | 1         |
| Zfp617_j5   | 3.75017   | 3.5957    | 0             | 1         | 1         |
| Fam32a_j1   | 2.74852   | 2.23516   | -0.298274     | 0.117331  | 0.426071  |
| Klf2        | 1.00074   | 1.55421   | 0.635109      | 0.0296488 | 0.184356  |
| XLOC_032386 | 0.0437667 | 0.0626131 | 0.516632      | 0.803941  | 1         |
| Sin3b       | 15.1648   | 15.3789   | 0.0202259     | 0.882121  | 0.962591  |
| Sin3b       | 9.09121   | 10.5545   | 0.215317      | 0.04004   | 0.223971  |
| Hmgxb4_j3   | 0         | 0.14615   | 0             | 1         | 1         |
| Hmgxb4      | 0.717707  | 0.836182  | 0             | 1         | 1         |
| XLOC_032389 | 0.125247  | 0.123297  | 0             | 1         | 1         |
| Tom1_j3     | 0         | 0.0572915 | 1.79769e+308  | 0.104082  | 1         |
| Tom1_j8     | 0.0685936 | 0         | -1.79769e+308 | 0.0361308 | 1         |
| Tom1_j13    | 0.0778631 | 0.0338902 | -1.20007      | 0.449722  | 1         |
| Mcm5        | 0.223678  | 0.0743845 | -1.58835      | 0.0788077 | 0.340449  |
| Mcm5_j3     | 1.52042   | 1.77535   | 0.223639      | 0.559731  | 0.820875  |
| XLOC_032393 | 0.265414  | 0.173309  | -0.614897     | 0.612679  | 0.847359  |
| Nr3c2       | 1.16734   | 1.19724   | 0             | 1         | 1         |
| Prmt10_j3   | 0.282582  | 0.150323  | 0             | 1         | 1         |
| Ttc29_j5    | 0.301915  | 0.145413  | -1.05398      | 0.0584199 | 0.283823  |
| Slc10a7     | 2.62381   | 2.48334   | 0             | 1         | 1         |
| Slc10a7_j3  | 0.158312  | 0.409049  | 0             | 1         | 1         |
| Otud4_j2    | 0.474152  | 0.36077   | 0             | 1         | 1         |
| Rnf150      | 1.71077   | 1.78389   | 0.0603871     | 0.678859  | 0.879317  |
| Tbc1d9      | 7.58151   | 7.37841   | -0.0391753    | 0.723552  | 0.901531  |
| Tbc1d9_j4   | 15.1349   | 24.9213   | 0.719498      | 1.15E-14  | 2.18E-12  |
| Clgn        | 4.59166   | 3.31239   | 0             | 1         | 1         |
| Dnajb1_j1   | 0.789694  | 0.915401  | 0.21311       | 0.439196  | 0.748796  |
| Gipc1_j1    | 1.24226   | 1.94232   | 0             | 1         | 1         |

|                  |             |           |              |           |           |
|------------------|-------------|-----------|--------------|-----------|-----------|
| Ptger1_j2        | 0.462231    | 0.559035  | 0            | 1         | 1         |
| Ptger1_j1        | 0.138683    | 0.124855  | 0            | 1         | 1         |
| Ddx39_j1         | 1.91532     | 1.9539    | 0.0287765    | 0.912984  | 0.972688  |
| Prkaca           | 38.4932     | 31.8138   | 0            | 1         | 1         |
| Palm3_j4         | 1.22518     | 6.89747   | 0            | 1         | 1         |
| Palm3_j5         | 0.0868077   | 0.16478   | 0            | 1         | 1         |
| Rfx1_j5          | 0.58243     | 0.677083  | 0.217248     | 0.400323  | 0.723811  |
| 4930432K21Rik_j3 | 0.0923423   | 0.115296  | 0.320279     | 0.71718   | 1         |
| Cacna1a_j5       | 10.2884     | 9.33661   | 0            | 1         | 1         |
| Cacna1a_j12      | 1.28666     | 1.62358   | 0            | 1         | 1         |
| Trmt1            | 12.5509     | 14.2124   | 0.179366     | 0.135657  | 0.458263  |
| Trmt1            | 4.33771     | 4.42166   | 0.0276561    | 0.874532  | 0.960123  |
| Lyl1_j2          | 0.0473099   | 0.232171  | 2.29498      | 0.0005495 | 0.0088307 |
| Lyl1_j6          | 0           | 0.109426  | 1.79769e+308 | 0.0026432 | 1         |
| Gadd45gip1_j1    | 5.0593      | 4.79509   | -0.0773815   | 0.5739    | 0.827829  |
| Syce2_j1         | 0.284958    | 0.261195  | 0            | 1         | 1         |
| Dnase2a_j2       | 5.54635     | 5.3045    | 0            | 1         | 1         |
| Prdx2_j2         | 17.0619     | 18.3648   | 0            | 1         | 1         |
| Hook2_j7         | 0.389245    | 0.121954  | -1.67434     | 0.0227304 | 0.153944  |
| Hook2_j6         | 0.216554    | 0.532806  | 1.29888      | 0.0068224 | 0.0645405 |
| Hook2_j8         | 0.542943    | 0.561424  | 0.0482878    | 0.935551  | 0.980308  |
| Hook2_j9         | 0.769163    | 1.08541   | 0.496875     | 0.228351  | 0.575412  |
| 2310036O22Rik_j1 | 3.80037     | 5.36697   | 0.49797      | 0.0321752 | 0.194538  |
| Tnpo2_j7         | 0.68147     | 1.05694   | 0.633168     | 0.0167478 | 0.124482  |
| Fbxw9            | 8.93309     | 9.8976    | 0.14792      | 0.229221  | 0.576313  |
| BC056474_j1      | 2.9228      | 3.30053   | 0.175347     | 0.380716  | 0.711564  |
| Man2b1           | 7.23861     | 6.6475    | -0.1229      | 0.351004  | 0.688205  |
| Man2b1_j6        | 0.323579    | 0.743082  | 1.1994       | 0.0083211 | 0.0747414 |
| Gpt2_j4          | 1.78076     | 2.12992   | 0            | 1         | 1         |
| Lonp2_j1         | 2.41991     | 2.12553   | -0.187132    | 0.254374  | 0.602713  |
| Gm2694_j3        | 0.618912    | 1.37885   | 1.15566      | 0.0444605 | 0.240553  |
| Papd5_j1         | 0.000204764 | 0.384881  | 0            | 1         | 1         |
| Cyld_j3          | 0.558596    | 0.454698  | 0            | 1         | 1         |
| XLOC_032460      | 0.0906306   | 0.0227651 | -1.99317     | 0.236288  | 1         |
| Chd9_j1          | 4.67568     | 7.70546   | 0.720706     | 0.0519828 | 0.264551  |
| Fto_j2           | 1.74981     | 1.54132   | 0            | 1         | 1         |
| Lpcat2_j2        | 0.0934114   | 0.0907753 | -0.0412984   | 0.967159  | 1         |
| Lpcat2_j4        | 0.343216    | 0.410957  | 0.259871     | 0.783662  | 0.9271    |
| Gnao1_j2         | 91.2334     | 83.3521   | 0            | 1         | 1         |
| Gnao1_j1         | 84.2969     | 75.6243   | 0            | 1         | 1         |
| Mt2              | 2.94934     | 3.35458   | 0.185737     | 0.598362  | 0.840761  |
| Nup93_j8         | 3.49875     | 4.5243    | 0            | 1         | 1         |
| Slc12a3_j6       | 0.338952    | 0.208012  | 0            | 1         | 1         |
| Slc12a3_j5       | 0.456014    | 0.582938  | 0            | 1         | 1         |
| Nlrc5_j8         | 0.0608622   | 0.013801  | -2.14077     | 0.399044  | 1         |
| Nlrc5_j11        | 0           | 0.0670566 | 1.79769e+308 | 0.0662686 | 1         |
| Nlrc5_j14        | 0.511015    | 0.234912  | -1.12124     | 0.0365831 | 0.211473  |

|                  |            |                 |            |           |           |
|------------------|------------|-----------------|------------|-----------|-----------|
| Nlrc5_j16        | 0.30747    | 0.111814        | -1.45935   | 0.173587  | 0.511473  |
| Polr2c_j3        | 0.340861   | 0.361909        | 0.0864455  | 0.85495   | 0.954077  |
| Polr2c_j4        | 0.453566   | 0.24501         | -0.88847   | 0.156909  | 0.490727  |
| Gpr56_j4         | 0.969468   | 0.0413786       | 0          | 1         | 1         |
| Mmp15_j1         | 3.5332     | 3.45594         | 0          | 1         | 1         |
| Ccdc113          | 0.123965   | 0.183438        | 0.565356   | 0.401159  | 0.724522  |
| XLOC_032497      | 0.0664821  | 1.38E-05        | -12.2355   | 0.995253  | 1         |
| XLOC_032497      | 0.0618935  | 0.0822055       | 0.409447   | 0.792731  | 1         |
| Ndr4_j6          | 357.617    | 298.546         | 0          | 1         | 1         |
| Setd6_j1         | 1.12053    | 1.59783         | 0          | 1         | 1         |
| 4930513N10Rik_j1 | 0.0541397  | 0.117273        | 0          | 1         | 1         |
| XLOC_032505      | 0.0791826  | 0.00391494      | -4.33812   | 0.514069  | 1         |
| Bean1_j6         | 0          | 0.0477881       | 0          | 1         | 1         |
| Bean1_j5         | 0.383146   | 0.390875        | 0          | 1         | 1         |
| Cmtm3_j1         | 0.0337886  | 0.276075        | 3.03045    | 0.0103168 | 0.0875526 |
| Car7_j5          | 0.00689895 | 0.202693        | 4.87678    | 0.190775  | 0.533074  |
| Ces4a_j1         | 0.0885587  | 0.0353682       | -1.32418   | 0.372324  | 1         |
| Cbfb_j1          | 0.052813   | 0.315102        | 0          | 1         | 1         |
| Cbfb_j5          | 0.0454442  | 0.0722782       | 0          | 1         | 1         |
| Cbfb             | 2.6118     | 5.15098         | 0          | 1         | 1         |
| Cbfb_j8          | 0.057165   | 0.132363        | 0          | 1         | 1         |
| Fbxl8            | 2.12753    | 2.03816         | 0          | 1         | 1         |
| Hsf4_j2          | 23.2263    | 22.7956         | 0          | 1         | 1         |
| Nol3_j2          | 0          | 1.05599         | 0          | 1         | 1         |
| Elmo3_j1         | 0.0609582  | 0.0568317       | -0.101124  | 0.912953  | 1         |
| Slc9a5           | 0.385205   | 0.310528        | -0.310905  | 0.414768  | 0.73287   |
| Slc9a5_j7        | 0.116366   | 0 -1.79769e+308 |            | 0.0041871 | 1         |
| Ctcf_j2          | 2.54419    | 2.88998         | 0          | 1         | 1         |
| Rltpr_j5         | 17.5469    | 19.4957         | 0          | 1         | 1         |
| Rltpr_j7         | 16.6345    | 17.6317         | 0          | 1         | 1         |
| XLOC_032528      | 0.104098   | 0.115866        | 0.15451    | 0.826511  | 1         |
| Nutf2_j3         | 0.0895256  | 0.231952        | 1.37345    | 0.0164632 | 0.122854  |
| Nutf2_j4         | 0.492676   | 0.475679        | -0.0506523 | 0.935996  | 0.980349  |
| Nutf2_j6         | 0.229304   | 0.175688        | -0.384248  | 0.438135  | 0.747937  |
| Nutf2_j8         | 0.0610327  | 0 -1.79769e+308 |            | 0.006844  | 1         |
| Ecd4_j9          | 0.485879   | 0.327645        | -0.568466  | 0.105957  | 0.404152  |
| Ecd4_j11         | 2.76466    | 3.38523         | 0.292151   | 0.0905506 | 0.3696    |
| Lpla2            | 0.924412   | 2.3755          | 1.36162    | 1.82E-07  | 9.08E-06  |
| Zfp90            | 0.670409   | 0.761341        | 0          | 1         | 1         |
| Cdh1             | 1.49088    | 1.11542         | 0          | 1         | 1         |
| Has3_j2          | 0.0866712  | 0.122233        | 0.496007   | 0.537269  | 1         |
| Cirh1a_j1        | 4.22763    | 4.44471         | 0          | 1         | 1         |
| Nip7             | 8.11433    | 9.42864         | 0.216577   | 0.165027  | 0.501347  |
| Nfat5_j11        | 0.435771   | 1.04192         | 1.2576     | 1.37E-09  | 1.13E-07  |
| Pmfbp1_j3        | 0.106866   | 0 -1.79769e+308 |            | 0.0797101 | 1         |
| XLOC_032552      | 0.314775   | 0.173366        | -0.860498  | 0.0953265 | 0.381208  |
| Txn14b           | 2.06361    | 2.08735         | 0          | 1         | 1         |



|                  |           |                 |            |           |           |
|------------------|-----------|-----------------|------------|-----------|-----------|
| Zfp821_j2        | 5.23651   | 6.62198         | 0          | 1         | 1         |
| Zfp821           | 1.78522   | 2.63272         | 0          | 1         | 1         |
| Ap1g1_j3         | 0         | 0.131602        | 0          | 1         | 1         |
| Phlpp2_j2        | 0.149646  | 0.0591772       | 0          | 1         | 1         |
| Zfp612_j3        | 1.09782   | 0.816988        | 0          | 1         | 1         |
| Mtss1l_j1        | 0.138962  | 0.284816        | 0          | 1         | 1         |
| Mtss1l           | 9.35173   | 7.82663         | 0          | 1         | 1         |
| Aars_j3          | 31.8893   | 37.0609         | 0          | 1         | 1         |
| mKIAA1990_j2     | 0.400252  | 0.29822         | 0          | 1         | 1         |
| mKIAA1990_j1     | 2.11203   | 1.63214         | 0          | 1         | 1         |
| Znrf1            | 1.6316    | 1.84742         | 0          | 1         | 1         |
| Znrf1_j2         | 3.18961   | 4.73477         | 0          | 1         | 1         |
| Zfp1_j1          | 0.628353  | 0.661938        | 0.0751223  | 0.825075  | 0.943645  |
| Cntnap4_j3       | 0.285753  | 0 -1.79769e+308 |            | 2.57E-09  | 1.99E-07  |
| Nudt7_j1         | 9.35725   | 9.61943         | 0.0398665  | 0.818783  | 0.94129   |
| Nudt7_j2         | 2.05962   | 2.59134         | 0.331316   | 0.379118  | 0.710597  |
| Vat1l_j3         | 43.3589   | 46.0104         | 0          | 1         | 1         |
| Vat1l_j4         | 0.119927  | 0.259789        | 0          | 1         | 1         |
| Wwox             | 0.597277  | 0.342503        | -0.802283  | 0.454945  | 0.758773  |
| Dynlrb2          | 0.337279  | 0.275216        | -0.293379  | 0.690501  | 0.885335  |
| Bcmo1_j2         | 0.0522401 | 0 -1.79769e+308 |            | 0.105409  | 1         |
| Bcmo1_j5         | 0.0742356 | 0.0531444       | -0.482193  | 0.848694  | 1         |
| 4933407C03Rik_j1 | 21.8937   | 21.0891         | 0          | 1         | 1         |
| 4933407C03Rik_j7 | 0.408235  | 0.178022        | 0          | 1         | 1         |
| Klhl36_j3        | 0.0575771 | 0.0560524       | -0.038719  | 0.961794  | 1         |
| 6430548M08Rik    | 40.918    | 39.0068         | -0.0690105 | 0.4242    | 0.739564  |
| Gse1_j2          | 0.438048  | 0.232676        | -0.912767  | 0.0065548 | 0.0625462 |
| XLOC_032601      | 0.122356  | 0.194266        | 0.666953   | 0.340538  | 0.680526  |
| Cox4i1_j3        | 8.99812   | 9.20305         | 0          | 1         | 1         |
| Foxf1a           | 0.185639  | 0.23416         | 0.334992   | 0.520076  | 0.797685  |
| Map1lc3b_j2      | 1.38379   | 1.52836         | 0          | 1         | 1         |
| XLOC_032610      | 0.102437  | 0.060679        | -0.755465  | 0.645308  | 1         |
| Jph3_j2          | 3.9218    | 3.78061         | 0          | 1         | 1         |
| Banp             | 0.609121  | 0.640746        | 0.0730234  | 0.783101  | 0.926859  |
| Banp_j11         | 0.803842  | 1.57787         | 0.972991   | 1.49E-06  | 5.84E-05  |
| Zfpm1_j7         | 4.84E-05  | 0.132484        | 11.4181    | 0.912952  | 1         |
| Zc3h18_j3        | 0.175168  | 0.349173        | 0.995207   | 0.0610412 | 0.291472  |
| Acsf3_j1         | 1.15808   | 1.21854         | 0          | 1         | 1         |
| Cdh15_j1         | 0.333159  | 0.262469        | -0.344065  | 0.720892  | 0.900127  |
| Spg7             | 2.46717   | 2.66516         | 0          | 1         | 1         |
| 4732415M23Rik_j2 | 3.80618   | 4.55732         | 0.259842   | 0.0173222 | 0.127449  |
| Cdk10_j3         | 6.33189   | 7.68725         | 0          | 1         | 1         |
| Tcf25_j2         | 14.6417   | 15.9081         | 0          | 1         | 1         |
| Tcf25_j1         | 12.9265   | 12.5273         | 0          | 1         | 1         |
| Tcf25_j5         | 15.4816   | 21.0691         | 0          | 1         | 1         |
| Def8_j1          | 3.20366   | 2.17497         | -0.558723  | 0.0042081 | 0.0444811 |
| Rab4a            | 6.66704   | 5.41757         | 0          | 1         | 1         |

|               |             |                 |           |           |           |
|---------------|-------------|-----------------|-----------|-----------|-----------|
| mKIAA0133_j4  | 1.86938     | 1.52052         | 0         | 1         | 1         |
| Cog2_j2       | 5.76446     | 5.7751          | 0         | 1         | 1         |
| Arv1_j3       | 0.373902    | 0.621077        | 0         | 1         | 1         |
| Arv1_j8       | 0.991869    | 1.13451         | 0         | 1         | 1         |
| Arv1_j6       | 0.256539    | 0.291955        | 0         | 1         | 1         |
| Gm505_j3      | 0.888474    | 0.453172        | -0.971272 | 0.004746  | 0.0487697 |
| Disc1_j2      | 0.0857638   | 0.0689213       | -0.31542  | 0.752503  | 1         |
| Ntpcr_j1      | 3.43126     | 3.45877         | 0         | 1         | 1         |
| Kcnk1_j3      | 1.35438     | 1.58569         | 0.227478  | 0.642412  | 0.862006  |
| XLOC_032660   | 0.207676    | 0.110868        | -0.905496 | 0.388218  | 0.715758  |
| Nrp1_j3       | 4.76815     | 3.69327         | 0         | 1         | 1         |
| Itgb1_j5      | 86.825      | 113.075         | 0.381094  | 1.01E-05  | 0.000313  |
| Insr_j5       | 3.00172     | 3.31843         | 0.144712  | 0.289974  | 0.63736   |
| Pex11c_j3     | 1.06052     | 0.731369        | -0.536098 | 0.315251  | 0.659219  |
| Xab2_j1       | 0.36845     | 0.210933        | -0.804687 | 0.0643463 | 0.301233  |
| Elavl1        | 4.75877     | 3.94469         | 0         | 1         | 1         |
| XLOC_032680   | 0.181835    | 0.196126        | 0.109151  | 0.908131  | 0.971038  |
| Col4a1_j1     | 5.97149     | 8.27378         | 0         | 1         | 1         |
| Ankrd10_j2    | 1.6358      | 2.10716         | 0         | 1         | 1         |
| Ankrd10_j1    | 5.22148     | 5.34444         | 0         | 1         | 1         |
| Tubgcp3_j1    | 0.447979    | 0.664489        | 0         | 1         | 1         |
| Pcid2_j1      | 7.04511     | 6.41283         | 0         | 1         | 1         |
| Grtp1_j1      | 0.423991    | 0.171088        | 0         | 1         | 1         |
| Dcun1d2_j1    | 9.04615     | 7.63017         | 0         | 1         | 1         |
| Csmd1_j5      | 0.0984863   | 0.236317        | 1.26273   | 0.0002744 | 0.0049697 |
| Csmd1_j4      | 0.0209943   | 0.0707421       | 1.75257   | 0.0095675 | 1         |
| Slc25a15_j6   | 0.105112    | 0               | 0         | 1         | 1         |
| Vdac3_j4      | 0.000262462 | 0.262485        | 0         | 1         | 1         |
| Polb_j2       | 5.21825     | 6.17377         | 0.242584  | 0.262887  | 0.611724  |
| Ikbkb         | 3.3656      | 3.22281         | 0         | 1         | 1         |
| Ap3m2_j1      | 0.000432688 | 0.333909        | 0         | 1         | 1         |
| Ap3m2         | 3.20657     | 3.66429         | 0         | 1         | 1         |
| Agpat6_j3     | 1.74592     | 2.45288         | 0.490492  | 0.223216  | 0.570235  |
| Agpat6_j2     | 0.672572    | 0.508433        | -0.403632 | 0.352324  | 0.68925   |
| Golga7_j1     | 17.3137     | 19.4104         | 0         | 1         | 1         |
| Golga7_j2     | 17.7857     | 20.3267         | 0         | 1         | 1         |
| Adam5_j3      | 0.135695    | 0 -1.79769e+308 | 0.0022063 |           | 1         |
| Htra4         | 1.32871     | 0.839083        | 0         | 1         | 1         |
| Plekha2       | 1.03226     | 1.26912         | 0         | 1         | 1         |
| Tacc1_j8      | 0.433034    | 0.735953        | 0         | 1         | 1         |
| Tacc1         | 1.07531     | 0.962715        | 0         | 1         | 1         |
| C330021F23Rik | 1.73413     | 1.98288         | 0.193386  | 0.653373  | 0.867469  |
| Letm2_j2      | 0.658655    | 0.600616        | 0         | 1         | 1         |
| Letm2_j4      | 0.660355    | 0.746589        | 0         | 1         | 1         |
| Letm2_j6      | 1.55094     | 1.35363         | 0         | 1         | 1         |
| Ddhd2_j3      | 2.30031     | 1.88224         | -0.289379 | 0.0511771 | 0.262111  |
| Ash2l         | 4.59722     | 5.41813         | 0.237034  | 0.034314  | 0.202972  |

|                  |           |            |               |           |           |
|------------------|-----------|------------|---------------|-----------|-----------|
| 4930444A02Rik_j2 | 1.31645   | 1.16601    | -0.175074     | 0.436262  | 0.746935  |
| Hook3_j2         | 1.34229   | 1.44266    | 0             | 1         | 1         |
| Hook3            | 2.53981   | 2.48946    | 0             | 1         | 1         |
| XLOC_032748      | 0.0528573 | 0.00381018 | -3.79417      | 0.690522  | 1         |
| Brf2_j1          | 0.345286  | 0.0594556  | -2.53791      | 0.0013847 | 0.0185724 |
| Chrna6_j2        | 3.28173   | 3.42614    | 0             | 1         | 1         |
| XLOC_032755      | 0.134733  | 0.0677447  | -0.991923     | 0.55341   | 1         |
| XLOC_032755      | 0.0361306 | 0.174104   | 2.26866       | 0.350167  | 0.687731  |
| Nrg1_j2          | 1.80244   | 0.488017   | 0             | 1         | 1         |
| Nrg1             | 4.1171    | 4.93533    | 0             | 1         | 1         |
| Nrg1_j3          | 0.991879  | 1.06693    | 0             | 1         | 1         |
| Wrn_j2           | 0.479439  | 0.69851    | 0             | 1         | 1         |
| Wrn_j4           | 0.100847  | 0.118421   | 0             | 1         | 1         |
| Dctn6_j3         | 32.7751   | 38.2558    | 0             | 1         | 1         |
| Leprot1_j1       | 19.0206   | 3.13987    | 0             | 1         | 1         |
| B930018H19_j5    | 0         | 0.0522132  | 1.79769e+308  | 0.0597572 | 1         |
| Tnks_j3          | 0.0046092 | 0.722526   | 0             | 1         | 1         |
| Lonrf1_j2        | 9.00365   | 10.0103    | 0.15291       | 0.173633  | 0.511484  |
| Dlc1_j2          | 0.338716  | 0.0767503  | 0             | 1         | 1         |
| Mtus1_j2         | 6.33359   | 6.73141    | 0             | 1         | 1         |
| Mtus1_j3         | 3.60464   | 6.04493    | 0             | 1         | 1         |
| Mtus1_j4         | 4.42661   | 4.21675    | 0             | 1         | 1         |
| Fgl1_j1          | 0.213915  | 0.163886   | -0.384348     | 0.689815  | 0.885115  |
| Asah1_j3         | 0.601572  | 0.660778   | 0             | 1         | 1         |
| Fam149a_j1       | 1.91112   | 1.66367    | -0.200049     | 0.403926  | 0.72656   |
| Tlr3_j3          | 0.352266  | 0.59025    | 0.74466       | 0.0508149 | 0.261088  |
| Tlr3_j4          | 0.162193  | 0.11535    | -0.491695     | 0.468022  | 0.766788  |
| 1700029J07Rik_j3 | 0.187327  | 0.318585   | 0.766124      | 0.367905  | 0.701229  |
| Snx25_j1         | 7.76641   | 8.51845    | 0             | 1         | 1         |
| Ccdc111_j1       | 0.205912  | 8.07E-05   | -11.3166      | 0.909118  | 0.971253  |
| BC088983         | 0.118732  | 0          | -1.79769e+308 | 0.0023453 | 1         |
| BC088983_j5      | 0.308247  | 0.261321   | -0.238265     | 0.731317  | 0.904922  |
| Clcn3_j2         | 0         | 0.247354   | 0             | 1         | 1         |
| Clcn3            | 12.494    | 11.4006    | 0             | 1         | 1         |
| Palld_j2         | 0.151231  | 0.0489935  | 0             | 1         | 1         |
| Sc4mol_j2        | 1.81009   | 12.217     | 0             | 1         | 1         |
| Klhl2_j1         | 2.18055   | 2.12912    | -0.0344306    | 0.883805  | 0.963164  |
| Csgalnact1_j3    | 0.598373  | 0.318454   | 0             | 1         | 1         |
| Slc18a1_j2       | 0.146971  | 0.0612427  | -1.26292      | 0.252491  | 0.6005    |
| Lzts1_j4         | 1.39555   | 2.503      | 0             | 1         | 1         |
| AK034302_j1      | 0.059458  | 0.235023   | 0             | 1         | 1         |
| XLOC_032832      | 0.159387  | 0.321326   | 1.0115        | 0.363001  | 0.697185  |
| XLOC_032832      | 0.292673  | 0.374385   | 0.355232      | 0.537763  | 0.80777   |
| Zfp868           | 4.51143   | 3.81766    | -0.240896     | 0.135837  | 0.458585  |
| Zfp868_j1        | 1.1221    | 1.70571    | 0.604168      | 0.0573791 | 0.280663  |
| Zfp869           | 0.45549   | 0.491268   | 0.109093      | 0.737626  | 0.907523  |
| Zfp866_j1        | 0.38551   | 0.568505   | 0.560404      | 0.211676  | 0.556532  |

|                  |           |           |               |           |          |
|------------------|-----------|-----------|---------------|-----------|----------|
| Zfp963           | 1.10468   | 0.714771  | -0.62808      | 0.0645932 | 0.302098 |
| Zfp866_j3        | 0.238168  | 0.165074  | -0.528862     | 0.202617  | 0.546273 |
| Zfp866_j4        | 0.115284  | 0.199419  | 0.790614      | 0.0832593 | 0.351738 |
| Gatad2a          | 4.99432   | 4.43062   | 0             | 1         | 1        |
| Mau2_j2          | 0.511107  | 0.567275  | 0             | 1         | 1        |
| Armc6_j1         | 4.35178   | 8.6101    | 0             | 1         | 1        |
| Armc6_j2         | 10.3927   | 9.02345   | 0             | 1         | 1        |
| Crtc1_j5         | 0.405473  | 1.02697   | 0             | 1         | 1        |
| Crtc1_j4         | 0.301533  | 0.255849  | 0             | 1         | 1        |
| Klhl26           | 0.0939857 | 0         | 0             | 1         | 1        |
| Ssbp4_j6         | 1.56621   | 0.789594  | 0             | 1         | 1        |
| Gdf15            | 0.148776  | 0.336371  | 1.17691       | 0.052361  | 0.265698 |
| Pik3r2_j6        | 13.3313   | 14.3756   | 0.108805      | 0.335019  | 0.675709 |
| Mast3_j5         | 1.15806   | 0.910178  | -0.347486     | 0.1399    | 0.465344 |
| Mast3_j6         | 2.08676   | 2.24261   | 0.103919      | 0.530344  | 0.803051 |
| Arrdc2           | 1.52683   | 1.45998   | 0             | 1         | 1        |
| Kcnn1_j2         | 4.17012   | 3.80826   | 0             | 1         | 1        |
| Kcnn1_j3         | 0.637118  | 0.856263  | 0             | 1         | 1        |
| Gm15427_j4       | 0.504222  | 0.769338  | 0.609558      | 0.118123  | 0.427862 |
| Ushbp1           | 1.23745   | 1.19457   | -0.0508757    | 0.841634  | 0.949957 |
| Ano8_j3          | 16.5182   | 17.4365   | 0             | 1         | 1        |
| Ano8_j7          | 6.32446   | 5.91827   | 0             | 1         | 1        |
| Unc13a_j7        | 1.11465   | 1.62702   | 0             | 1         | 1        |
| B3gnt3_j3        | 0.0580516 | 0.011134  | -2.38237      | 0.4012    | 1        |
| Fcho1_j7         | 0.361914  | 0.113777  | 0             | 1         | 1        |
| Eps15l1_j3       | 3.13416   | 2.9511    | 0             | 1         | 1        |
| Eps15l1_j10      | 1.91479   | 1.62796   | 0             | 1         | 1        |
| Eps15l1_j5       | 0.949788  | 0.670521  | 0             | 1         | 1        |
| Eps15l1_j4       | 3.4984    | 3.46673   | 0             | 1         | 1        |
| Calr3            | 1.18342   | 0.785217  | -0.591796     | 0.0963965 | 0.383422 |
| Calr3_j2         | 1.46468   | 0.893942  | -0.71233      | 0.034041  | 0.202044 |
| 9130011J15Rik_j1 | 0.350793  | 0.306102  | -0.196606     | 0.67728   | 0.878715 |
| Arhgap10_j2      | 0.408302  | 0.807243  | 0.983365      | 0.0930681 | 0.37533  |
| Arhgap10_j1      | 0.0603638 | 0         | -1.79769e+308 | 0.0246382 | 1        |
| Rbmxrt_j1        | 7.16485   | 10.4837   | 0             | 1         | 1        |
| Lsm6_j5          | 0.326238  | 0.204562  | -0.673385     | 0.12676   | 0.443457 |
| 1700011L22Rik_j4 | 0.079423  | 0.0472956 | -0.74785      | 0.568737  | 1        |
| Mmaa_j15         | 1.61771   | 1.56003   | 0             | 1         | 1        |
| Mmaa_j14         | 2.61031   | 2.96173   | 0             | 1         | 1        |
| Smad1_j2         | 1.58211   | 5.67061   | 0             | 1         | 1        |
| Smad1_j4         | 0.130526  | 0.672679  | 0             | 1         | 1        |
| Abce1_j2         | 19.3982   | 23.0186   | 0             | 1         | 1        |
| Smarca5_j5       | 1.45272   | 2.23898   | 0.624084      | 0.031307  | 0.191005 |
| Gab1             | 1.11051   | 1.20419   | 0             | 1         | 1        |
| Usp38_j1         | 0.395392  | 0.705344  | 0             | 1         | 1        |
| Il15_j4          | 0         | 0.0523852 | 1.79769e+308  | 0.173833  | 1        |
| Zfp330_j2        | 0.392367  | 0.316621  | -0.309446     | 0.59931   | 0.841178 |

|                  |             |                 |            |           |           |
|------------------|-------------|-----------------|------------|-----------|-----------|
| Cd97_j4          | 0.177791    | 0.15101         | -0.235541  | 0.628817  | 0.855673  |
| Nanos3_j1        | 0.0613566   | 0.393321        | 2.68042    | 0.145755  | 0.473736  |
| Zswim4_j2        | 4.09608     | 3.91374         | 0          | 1         | 1         |
| Mri1_j2          | 6.97452     | 7.44092         | 0          | 1         | 1         |
| Mri1_j4          | 0.413878    | 0.265362        | 0          | 1         | 1         |
| Nfix_j1          | 0.133842    | 0.134261        | 0.0045111  | 0.993726  | 1         |
| Rad23a           | 25.5498     | 25.3204         | -0.0130142 | 0.891504  | 0.965687  |
| Rad23a           | 0.272568    | 0.0343876       | -2.98666   | 0.0095328 | 0.0826555 |
| Mast1_j4         | 2.03136     | 2.44342         | 0          | 1         | 1         |
| Gm5741           | 0.0495798   | 0 -1.79769e+308 |            | 0.0452532 | 1         |
| Wdr83            | 1.72987     | 1.83315         | 0.0836636  | 0.571558  | 0.826943  |
| Zfp791_j2        | 0.137933    | 0.0783525       | -0.815912  | 0.330228  | 0.672176  |
| 4921524J17Rik_j1 | 3.46957     | 3.49146         | 0.00907105 | 0.973593  | 0.99239   |
| Neto2            | 0.622762    | 0.832678        | 0          | 1         | 1         |
| N4bp1            | 4.46071     | 4.59066         | 0          | 1         | 1         |
| Zfp423_j6        | 1.26276     | 0.711531        | 0          | 1         | 1         |
| Snx20            | 0.179241    | 0.416597        | 1.21675    | 0.130994  | 0.450516  |
| Gm5356           | 0.985528    | 0.752726        | -0.388772  | 0.361109  | 0.695733  |
| Tox3             | 1.84042     | 1.20714         | 0          | 1         | 1         |
| Aktip_j1         | 12.0331     | 9.68794         | 0          | 1         | 1         |
| Aktip            | 12.4833     | 10.5637         | 0          | 1         | 1         |
| Rpgrip1_j5       | 0.338912    | 0.328222        | -0.0462429 | 0.959832  | 0.988566  |
| 4933436C20Rik_j1 | 0.101411    | 0.0745503       | -0.443922  | 0.734485  | 1         |
| XLOC_032964      | 0.0130571   | 0.0614032       | 2.23348    | 0.56409   | 1         |
| Nudt21_j1        | 0.000137034 | 0.757887        | 0          | 1         | 1         |
| Fam192a_j1       | 3.17094     | 5.85994         | 0          | 1         | 1         |
| Fam192a_j2       | 3.04474     | 2.38488         | 0          | 1         | 1         |
| Ciapi1_j2        | 27.664      | 28.3905         | 0          | 1         | 1         |
| Ccdc102a_j2      | 0.139525    | 0.319155        | 1.19374    | 0.025174  | 0.165035  |
| Gtl3             | 0.890513    | 0.951248        | 0          | 1         | 1         |
| Csnk2a2_j2       | 0.194499    | 0.530322        | 1.44711    | 0.0503967 | 0.259651  |
| Cnot1_j1         | 2.26372     | 2.5216          | 0          | 1         | 1         |
| Cnot1_j9         | 2.82452     | 2.28853         | 0          | 1         | 1         |
| Cnot1_j12        | 0.127728    | 0.0407709       | 0          | 1         | 1         |
| Got2_j1          | 1.07099     | 2.01646         | 0          | 1         | 1         |
| Cdh8             | 0.368284    | 0.472256        | 0          | 1         | 1         |
| Cdh8             | 0.807045    | 0.833183        | 0          | 1         | 1         |
| XLOC_032992      | 0.20083     | 0 -1.79769e+308 |            | 0.0383676 | 0.217904  |
| Tk2_j1           | 0.954428    | 1.01255         | 0          | 1         | 1         |
| Tk2              | 7.23911     | 7.72134         | 0          | 1         | 1         |
| Dync1li2_j1      | 0           | 0.0723063       | 0          | 1         | 1         |
| Nae1_j1          | 17.5374     | 20.3409         | 0.213945   | 0.209049  | 0.553253  |
| Rrad             | 0.195483    | 0.30361         | 0.635175   | 0.252463  | 0.600491  |
| Tradd_j2         | 1.24173     | 1.55233         | 0          | 1         | 1         |
| Tradd_j4         | 2.0312      | 2.80477         | 0          | 1         | 1         |
| Tradd            | 2.48218     | 4.24754         | 0          | 1         | 1         |
| Lrrc29_j4        | 0.106532    | 0.180434        | 0.76018    | 0.406957  | 0.727764  |

|                  |           |             |                 |            |           |           |
|------------------|-----------|-------------|-----------------|------------|-----------|-----------|
| Lrrc29_j5        | 0.118973  |             | 0 -1.79769e+308 | 0.008673   |           | 1         |
| Kctd19_j4        | 0.207827  | 0.0689521   |                 | -1.59172   | 0.10101   | 0.393603  |
| Tppp3_j2         | 7.76438   | 10.5766     |                 | 0.445935   | 0.0147917 | 0.11376   |
| Atp6v0d1_j2      | 105.453   | 112.466     |                 | 0          | 1         | 1         |
| Atp6v0d1         | 41.3055   | 40.146      |                 | 0          | 1         | 1         |
| Ranbp10_j1       | 4.8902    | 3.91227     |                 | 0          | 1         | 1         |
| Cenpt_j1         | 3.3546    | 4.06834     |                 | 0.278297   | 0.0972746 | 0.385499  |
| Psmb10_j8        | 0.113804  | 0.0991475   |                 | -0.198898  | 0.862     | 1         |
| Slc12a4_j1       | 0.911556  | 1.86374     |                 | 1.0318     | 3.08E-07  | 1.46E-05  |
| Chtf8_j1         | 1.30595   | 2.17626     |                 | 0          | 1         | 1         |
| Terf2            | 3.07091   | 4.17503     |                 | 0          | 1         | 1         |
| Terf2_j4         | 0.976234  | 0.896514    |                 | 0          | 1         | 1         |
| Nob1_j2          | 1.34668   | 1.8092      |                 | 0.425953   | 0.312157  | 0.656585  |
| AK042944_j1      | 0.0910953 | 0.000474016 |                 | -7.5863    | 0.765735  | 1         |
| AK042944_j3      | 0.30902   | 0.173196    |                 | -0.835297  | 0.290311  | 0.637693  |
| 2400003C14Rik_j2 | 22.3758   | 26.3558     |                 | 0          | 1         | 1         |
| Ddx19a           | 4.89893   | 5.546       |                 | 0          | 1         | 1         |
| Mrc1_j8          | 0.68251   | 0.48859     |                 | -0.482226  | 0.51263   | 0.792284  |
| Mrc1_j9          | 0.10605   | 0.301478    |                 | 1.50731    | 0.164506  | 0.500528  |
| Mrc1_j4          | 0.20643   | 0.26242     |                 | 0.346224   | 0.528993  | 0.802307  |
| AK053982         | 0.56191   | 0.467196    |                 | 0          | 1         | 1         |
| Rfwd3_j1         | 0.614567  | 0.748559    |                 | 0.284547   | 0.399446  | 0.723014  |
| Mikl_j5          | 0.219291  | 0.0777591   |                 | -1.49576   | 0.13921   | 0.463926  |
| Mikl_j6          | 0.280501  | 0.410859    |                 | 0.550637   | 0.27092   | 0.620012  |
| Bcar1_j1         | 0         | 0.111715    |                 | 0          | 1         | 1         |
| Tmem231_j2       | 2.70676   | 2.70907     |                 | 0          | 1         | 1         |
| Gcsh_j1          | 0.781637  | 1.44665     |                 | 0          | 1         | 1         |
| Gcsh_j4          | 1.20435   | 1.93529     |                 | 0          | 1         | 1         |
| Pkd1l2_j17       | 0         | 0.054242    | 1.79769e+308    |            | 0.0965713 | 1         |
| Pkd1l2_j22       | 0.300179  | 0.251623    |                 | -0.25456   | 0.76152   | 0.917949  |
| Mphosph6_j1      | 3.21973   | 3.12556     |                 | -0.0428256 | 0.884113  | 0.963322  |
| Mphosph6         | 2.0316    | 2.28655     |                 | 0.170555   | 0.551174  | 0.815748  |
| Taf1c_j1         | 0.895285  | 0.854507    |                 | -0.0672553 | 0.821681  | 0.942532  |
| Kcng4_j3         | 0.0678471 |             | 0 -1.79769e+308 |            | 0.007946  | 1         |
| Kcng4_j4         | 3.15972   | 1.95984     |                 | -0.689065  | 0.0002088 | 0.0039788 |
| Zdhhc7_j6        | 3.71142   | 5.44754     |                 | 0          | 1         | 1         |
| AK039624_j3      | 0         | 0.363501    |                 | 0          | 1         | 1         |
| Mthfsd_j1        | 0.0576419 | 0           |                 | 0          | 1         | 1         |
| Zcchc14_j2       | 0.108228  | 0.191588    |                 | 0          | 1         | 1         |
| Zcchc14_j4       | 0.149685  | 0           |                 | 0          | 1         | 1         |
| Klhdc4_j1        | 1.08558   | 2.72508     |                 | 1.32783    | 3.59E-05  | 0.0008992 |
| Klhdc4_j4        | 0.887431  | 0.727035    |                 | -0.287609  | 0.448028  | 0.754671  |
| Fam38a_j10       | 0.0574585 | 0.115436    |                 | 1.0065     | 0.391461  | 1         |
| Cbfa2t3_j2       | 0.242006  | 0.259269    |                 | 0.0994093  | 0.836413  | 0.947564  |
| AK032654_j3      | 0.194166  | 0.142641    |                 | -0.444902  | 0.486708  | 0.777764  |
| AK032654_j2      | 0.175659  | 0.198342    |                 | 0.175215   | 0.79298   | 0.931024  |
| Ankrd11_j1       | 8.118     | 6.42461     |                 | 0          | 1         | 1         |

|                  |            |            |               |           |          |
|------------------|------------|------------|---------------|-----------|----------|
| Fanca_j5         | 0.260298   | 0.398451   | 0.614238      | 0.0733086 | 0.326174 |
| XLOC_033119      | 0.170864   | 0.226015   | 0             | 1         | 1        |
| XLOC_033119      | 0.314815   | 0.141076   | 0             | 1         | 1        |
| XLOC_033119      | 0.113808   | 0.0848236  | 0             | 1         | 1        |
| XLOC_033123      | 0          | 0.060049   | 1.79769e+308  | 0.205814  | 1        |
| 1700054N08Rik_j4 | 0.698836   | 0.73815    | 0             | 1         | 1        |
| 1700054N08Rik    | 0.16185    | 0.138819   | 0             | 1         | 1        |
| Acta1_j1         | 0.643163   | 1.21761    | 0.920792      | 0.0150073 | 0.115008 |
| Taf5l            | 1.57414    | 1.48186    | 0             | 1         | 1        |
| Agt_j3           | 1.15387    | 1.286      | 0             | 1         | 1        |
| Ttc13_j3         | 0.97758    | 1.11667    | 0             | 1         | 1        |
| XLOC_033134      | 0.00939437 | 0.0805719  | 3.10041       | 0.481328  | 1        |
| XLOC_033140      | 0          | 0.0483052  | 1.79769e+308  | 0.152737  | 1        |
| Tomm20_j1        | 16.4934    | 16.0796    | 0             | 1         | 1        |
| Rbm34            | 1.72357    | 1.53082    | 0             | 1         | 1        |
| Zfp358_j1        | 8.05564    | 8.23816    | 0             | 1         | 1        |
| Pnpla6_j7        | 11.5672    | 11.2866    | 0             | 1         | 1        |
| 2310057J16Rik_j8 | 0.21449    | 0.0977393  | 0             | 1         | 1        |
| 2900053A13Rik_j1 | 0.210558   | 0.310743   | 0             | 1         | 1        |
| 2900053A13Rik_j4 | 0.345951   | 0.169529   | 0             | 1         | 1        |
| Map2k7_j4        | 0.325048   | 0.200817   | -0.694769     | 0.10754   | 0.407699 |
| Ccl25_j5         | 0.450225   | 0.576523   | 0.356733      | 0.551587  | 0.815853 |
| Ccl25_j3         | 0.268203   | 0.0549511  | -2.28711      | 0.112034  | 0.416581 |
| Ccl25_j4         | 0.219425   | 0.350959   | 0.67757       | 0.390121  | 0.717194 |
| Ccl25_j1         | 0.413416   | 0.395897   | -0.0624721    | 0.926057  | 0.977045 |
| Lass4_j5         | 1.53979    | 1.72772    | 0             | 1         | 1        |
| Lass4_j4         | 0.0855441  | 0.0857105  | 0             | 1         | 1        |
| Zfp958_j1        | 1.14636    | 0.00112477 | 0             | 1         | 1        |
| Zfp958           | 1.74005    | 2.29903    | 0             | 1         | 1        |
| Col4a2_j2        | 2.32288    | 3.37817    | 0             | 1         | 1        |
| 4931415C17Rik_j1 | 0.117718   | 0.0023684  | 0             | 1         | 1        |
| Mcf2l_j1         | 2.33351    | 2.67349    | 0.196221      | 0.232114  | 0.579168 |
| Mcf2l_j6         | 13.4678    | 13.9954    | 0.0554486     | 0.64593   | 0.863424 |
| Lamp1_j1         | 4.86456    | 7.75263    | 0             | 1         | 1        |
| Tmco3            | 7.74968    | 8.06579    | 0             | 1         | 1        |
| Tfdp1_j5         | 6.28505    | 7.37976    | 0.23165       | 0.0829694 | 0.350926 |
| Fam70b           | 0.156855   | 0.266523   | 0.764834      | 0.206641  | 0.551278 |
| Zfp828           | 5.29682    | 4.82422    | 0             | 1         | 1        |
| Arhgef10         | 1.21708    | 1.39043    | 0             | 1         | 1        |
| Arhgef10_j5      | 0.0941484  | 0.0837755  | 0             | 1         | 1        |
| Arhgef10_j8      | 0.0914351  | 0          | 0             | 1         | 1        |
| Kbtbd11_j4       | 8.73126    | 4.4847     | 0             | 1         | 1        |
| Myom2_j2         | 0.103807   | 0.0476935  | -1.12204      | 0.463066  | 1        |
| XLOC_032189      | 0.124936   | 0.0740218  | -0.755173     | 0.489485  | 1        |
| Thsd1_j1         | 0.0566526  | 0.0345427  | -0.713762     | 0.465226  | 1        |
| Thsd1            | 0.314066   | 0.373858   | 0.251422      | 0.482754  | 0.77583  |
| Slc20a2_j2       | 0.375754   | 0          | -1.79769e+308 | 1.24E-08  | 8.56E-07 |

|                  |           |                 |            |           |           |
|------------------|-----------|-----------------|------------|-----------|-----------|
| Slc20a2_j5       | 1.59566   | 1.68458         | 0.0782376  | 0.754949  | 0.915506  |
| Ank1             | 3.91598   | 4.40471         | 0          | 1         | 1         |
| Ank1_j6          | 0.0573066 | 0               | 0          | 1         | 1         |
| Ank1_j4          | 7.59327   | 6.03141         | 0          | 1         | 1         |
| Ank1_j9          | 2.65271   | 2.11064         | 0          | 1         | 1         |
| Zmat4_j2         | 0.205119  | 0.190015        | 0          | 1         | 1         |
| Zmat4_j5         | 0.252172  | 0               | 0          | 1         | 1         |
| Fgfr1            | 1.60979   | 0.495497        | 0          | 1         | 1         |
| Fgfr1_j5         | 0.746409  | 0.144567        | 0          | 1         | 1         |
| Fgfr1_j7         | 11.6212   | 7.98762         | 0          | 1         | 1         |
| Kcnu1_j1         | 0.824781  | 0.620867        | -0.409728  | 0.422749  | 0.738516  |
| Rnf170_j1        | 0.259357  | 0.173754        | -0.577893  | 0.729306  | 0.904065  |
| Rnf170_j2        | 0.170033  | 0.148138        | -0.198872  | 0.844858  | 0.950919  |
| Thap1_j3         | 0.228076  | 0 -1.79769e+308 |            | 0.0005063 | 0.0082262 |
| Dusp26_j2        | 47.5261   | 65.6068         | 0          | 1         | 1         |
| Fut10            | 0.317347  | 0.207519        | -0.612816  | 0.213393  | 0.558539  |
| Fut10            | 0.302619  | 0.258575        | -0.226921  | 0.672892  | 0.876557  |
| XLOC_032243      | 0.182422  | 0.119077        | -0.615384  | 0.349192  | 0.687028  |
| XLOC_032243      | 0.161934  | 0.106592        | -0.603306  | 0.518366  | 0.796452  |
| Purg_j1          | 5.19521   | 5.91413         | 0.186983   | 0.238735  | 0.585819  |
| XLOC_032248      | 0.149379  | 0.0387419       | -1.94701   | 0.135632  | 0.458263  |
| Dusp4_j2         | 1.08653   | 0.647392        | 0          | 1         | 1         |
| XLOC_032263      | 0.2053    | 0.112001        | -0.874221  | 0.129916  | 0.448911  |
| Tusc3_j6         | 5.49045   | 4.17284         | 0          | 1         | 1         |
| Tusc3            | 17.7048   | 21.0499         | 0          | 1         | 1         |
| Efha2_j2         | 0.140225  | 0.134006        | -0.0654445 | 0.937934  | 0.980993  |
| Sorbs2_j12       | 0.300455  | 0.213134        | 0          | 1         | 1         |
| Ufsp2_j4         | 1.30016   | 0 -1.79769e+308 |            | 1.47E-11  | 1.73E-09  |
| 4933411K20Rik_j1 | 3.78774   | 3.05562         | 0          | 1         | 1         |
| Acsl1_j4         | 1.96523   | 3.79494         | 0          | 1         | 1         |
| Dctd_j2          | 0.09648   | 0.227444        | 1.23721    | 0.155132  | 0.488311  |
| XLOC_032293      | 0.166123  | 0.0809252       | -1.03759   | 0.217621  | 0.563618  |
| Aga_j1           | 0.493864  | 0 -1.79769e+308 |            | 0.000231  | 0.00432   |
| AK141659_j1      | 0.207854  | 0.294568        | 0.503031   | 0.603573  | 0.843413  |
| Hmgb2_j1         | 0.220068  | 0.25566         | 0.216277   | 0.783915  | 0.927222  |
| AW046200_j3      | 0.0608801 | 0.043627        | -0.480749  | 0.775754  | 1         |
| Aadat_j1         | 0.0535345 | 0 -1.79769e+308 |            | 0.097828  | 1         |
| XLOC_032307      | 0.197351  | 0.0650405       | -1.60135   | 0.281879  | 0.630425  |
| XLOC_032307      | 0.252811  | 0.0664668       | -1.92736   | 0.130231  | 0.449278  |
| Nek1_j6          | 9.08591   | 8.61482         | 0          | 1         | 1         |
| Ddx60_j5         | 0.0489002 | 0.152803        | 1.64376    | 0.0126841 | 1         |
| Ddx60_j7         | 0.0772039 | 0.0369665       | -1.06245   | 0.398348  | 1         |
| Sh2d4a_j2        | 0.60353   | 0.523093        | -0.206358  | 0.562733  | 0.822297  |
| Ints10_j9        | 1.06774   | 0.4035          | 0          | 1         | 1         |
| Zfp930_j1        | 0.554956  | 0.130194        | 0          | 1         | 1         |
| Gmip_j4          | 0.395667  | 0.358074        | -0.144029  | 0.740131  | 0.908917  |
| Gmip_j5          | 0.311469  | 0.081343        | -1.937     | 0.0341034 | 0.202242  |



|             |           |                 |            |           |           |
|-------------|-----------|-----------------|------------|-----------|-----------|
| Gmip_j7     | 1.86546   | 2.40689         | 0.367637   | 0.0566079 | 0.27835   |
| Sugp1_j1    | 10.0167   | 9.68477         | 0          | 1         | 1         |
| Sugp1_j2    | 1.96407   | 1.66569         | 0          | 1         | 1         |
| Sugp1_j3    | 1.66987   | 1.98698         | 0          | 1         | 1         |
| Tmem161a    | 0.49963   | 0.482218        | -0.0511747 | 0.93653   | 0.980501  |
| Sugp2_j2    | 1.72468   | 1.30473         | 0          | 1         | 1         |
| Comp_j1     | 3.01991   | 2.86672         | 0          | 1         | 1         |
| Crlf1_j3    | 0.019864  | 0.341223        | 4.10249    | 0.0384289 | 0.218074  |
| Fkbp8_j2    | 33.7172   | 45.36           | 0          | 1         | 1         |
| Eil_j1      | 0.35616   | 0.218163        | -0.707121  | 0.220625  | 0.567463  |
| Isyna1      | 0.884596  | 0.855558        | -0.0481529 | 0.8924    | 0.965921  |
| Lsm4_j1     | 8.1783    | 9.26204         | 0.179529   | 0.484125  | 0.776298  |
| Pde4c_j4    | 0.398399  | 0.406152        | 0.0278049  | 0.935213  | 0.980233  |
| Pde4c_j3    | 0.17029   | 0.0346338       | -2.29774   | 0.0472544 | 0.249533  |
| Pde4c_j15   | 0.284264  | 0.186996        | -0.604225  | 0.243783  | 0.591081  |
| Pde4c_j17   | 0.0914888 | 0.384986        | 2.07314    | 0.0002041 | 0.0039024 |
| Pde4c_j23   | 1.5215    | 1.31985         | -0.205128  | 0.487498  | 0.778377  |
| Mtap1s_j1   | 0.279528  | 0 -1.79769e+308 |            | 2.19E-06  | 8.26E-05  |
| Myo9b_j3    | 1.35815   | 1.91627         | 0.496656   | 0.0005587 | 0.0089443 |
| Myo9b_j16   | 1.29358   | 1.43253         | 0.147199   | 0.356307  | 0.692255  |
| Myo9b_j15   | 0.424114  | 0.748214        | 0.819      | 0.000254  | 0.0046803 |
| Use1_j3     | 8.42077   | 8.86641         | 0.0743981  | 0.713511  | 0.896209  |
| Gtpbp3_j4   | 1.37719   | 1.22896         | -0.164294  | 0.35227   | 0.68925   |
| Fam125a_j4  | 7.01357   | 6.16408         | -0.186264  | 0.385929  | 0.714331  |
| Slc27a1_j2  | 1.61968   | 0.986942        | -0.714674  | 0.0368371 | 0.212311  |
| Slc27a1_j11 | 1.24507   | 0.733117        | -0.764108  | 0.0088891 | 0.0784217 |
| Slc27a1_j12 | 0.447124  | 0.389895        | -0.197587  | 0.673851  | 0.877026  |
| Slc27a1_j16 | 1.75597   | 1.83735         | 0.0653574  | 0.81272   | 0.938836  |
| Glt25d1     | 9.63632   | 10.0859         | 0.065787   | 0.490746  | 0.780087  |
| Jak3_j5     | 0.450911  | 0.405099        | -0.15457   | 0.667927  | 0.87439   |
| Jak3_j9     | 0.687774  | 0.695536        | 0.0161898  | 0.949587  | 0.985371  |
| Jak3_j15    | 0.380188  | 0.25845         | -0.556831  | 0.26908   | 0.618001  |
| Zfp617_j3   | 0.0680831 | 0.10936         | 0          | 1         | 1         |
| Tpm4_j2     | 0.654419  | 0.371471        | -0.816963  | 0.0059054 | 0.0578066 |
| Nwd1_j4     | 0.081735  | 0.0770472       | -0.0852109 | 0.871032  | 1         |
| Nwd1_j5     | 0.173664  | 0.0414473       | -2.06695   | 0.0099369 | 0.0853084 |
| Sin3b_j2    | 0.0411672 | 0.0500602       | 0.282167   | 0.811737  | 1         |
| Tom1_j5     | 0.298752  | 0.235286        | -0.34453   | 0.691436  | 0.885712  |
| Nr3c2_j3    | 0.460058  | 0.00181653      | 0          | 1         | 1         |
| Nr3c2_j4    | 1.89731   | 1.57172         | 0          | 1         | 1         |
| Ttc29_j1    | 0.0666038 | 0.025235        | -1.40018   | 0.392828  | 1         |
| Ttc29_j3    | 0.106017  | 0.0926097       | -0.195067  | 0.830141  | 1         |
| Zfp827_j5   | 0.0629598 | 0.0965757       | 0.61723    | 0.347894  | 1         |
| AK041972    | 0.133345  | 0.130318        | -0.0331197 | 0.970961  | 1         |
| Otud4_j3    | 1.66541   | 0.987372        | 0          | 1         | 1         |
| Anapc10_j1  | 2.14355   | 2.19469         | 0          | 1         | 1         |
| Anapc10_j2  | 2.27983   | 2.56788         | 0          | 1         | 1         |

|                  |           |                 |            |           |           |
|------------------|-----------|-----------------|------------|-----------|-----------|
| Anapc10          | 0.537944  | 0.29929         | 0          | 1         | 1         |
| Anapc10_j3       | 0.652857  | 0.495945        | 0          | 1         | 1         |
| Rnf150_j1        | 0.104748  | 0 -1.79769e+308 |            | 6.31E-07  | 1         |
| Clgn_j2          | 2.04359   | 1.84152         | 0          | 1         | 1         |
| Gipc1_j4         | 0.0955646 | 0               | 0          | 1         | 1         |
| Ptger1           | 4.03904   | 4.39385         | 0          | 1         | 1         |
| Lphn1_j2         | 5.75307   | 4.34425         | 0          | 1         | 1         |
| Prkaca_j2        | 77.8693   | 72.407          | 0          | 1         | 1         |
| Samd1_j1         | 2.69929   | 3.77625         | 0.484374   | 0.0416603 | 0.230288  |
| Podnl1_j4        | 0.0681773 | 0 -1.79769e+308 |            | 0.0061809 | 1         |
| Podnl1_j3        | 0.0601472 | 0.11129         | 0.887751   | 0.324483  | 1         |
| 4930432K21Rik_j2 | 0.0661836 | 0 -1.79769e+308 |            | 0.0253004 | 1         |
| Cacna1a_j2       | 3.54537   | 3.63119         | 0          | 1         | 1         |
| Cacna1a_j4       | 1.03514   | 1.06159         | 0          | 1         | 1         |
| Cacna1a_j10      | 3.52857   | 3.90692         | 0          | 1         | 1         |
| Trmt1_j1         | 0.699105  | 0 -1.79769e+308 |            | 1.37E-09  | 1.13E-07  |
| Lyl1_j4          | 0.13258   | 0.00929192      | -3.83475   | 0.375331  | 1         |
| Dnase2a_j1       | 0.0607172 | 0.115059        | 0          | 1         | 1         |
| Hook2_j5         | 0.957253  | 0.305048        | -1.64986   | 0.000299  | 0.0053343 |
| Tnpo2_j4         | 32.4611   | 38.3337         | 0.2399     | 0.0061936 | 0.0600497 |
| XLOC_032444      | 0.0668883 | 0.0358941       | -0.898007  | 0.574566  | 1         |
| Dhps             | 9.91067   | 11.4277         | 0.205478   | 0.213749  | 0.558982  |
| Man2b1_j1        | 0.10819   | 0.106196        | -0.0268311 | 0.969919  | 1         |
| Gpt2_j1          | 4.04935   | 3.72956         | 0          | 1         | 1         |
| XLOC_032446      | 0.061742  | 0.0139574       | -2.14522   | 0.254043  | 1         |
| Gm2694_j2        | 0.0927587 | 0 -1.79769e+308 |            | 0.13642   | 1         |
| Adcy7_j7         | 0.224798  | 0.471031        | 1.06719    | 0.0113604 | 0.0942269 |
| Nod2_j3          | 0.0482458 | 0 -1.79769e+308 |            | 0.0082431 | 1         |
| Nod2             | 0.258682  | 0.359403        | 0.474423   | 0.2076    | 0.55198   |
| XLOC_032460      | 0.23018   | 0.161366        | -0.512424  | 0.51751   | 0.795789  |
| XLOC_032460      | 0.112874  | 0 -1.79769e+308 |            | 0.0115068 | 1         |
| XLOC_032460      | 0.0577585 | 0.0494392       | -0.224378  | 0.874798  | 1         |
| Chd9_j5          | 0.119888  | 0 -1.79769e+308 |            | 5.13E-10  | 1         |
| Chd9_j10         | 0.512017  | 0.148785        | -1.78297   | 6.88E-07  | 3.00E-05  |
| Chd9_j14         | 1.90437   | 1.02839         | -0.888924  | 8.00E-08  | 4.43E-06  |
| XLOC_032461      | 0.12664   | 0.112257        | -0.173932  | 0.770992  | 1         |
| Fto_j1           | 2.13272   | 4.27211         | 0          | 1         | 1         |
| Fto_j3           | 16.3503   | 16.3386         | 0          | 1         | 1         |
| Lpcat2           | 0.157846  | 0.00481831      | -5.03385   | 0.230217  | 0.577283  |
| Lpcat2_j1        | 0.0970326 | 0.0403501       | -1.2659    | 0.394607  | 1         |
| Ces7_j1          | 0.510793  | 0.118499        | -2.10786   | 0.0551704 | 0.274103  |
| Gnao1_j8         | 36.0374   | 34.1658         | 0          | 1         | 1         |
| Nup93_j6         | 15.0661   | 17.4026         | 0          | 1         | 1         |
| Slc12a3_j1       | 0.188995  | 0.32038         | 0          | 1         | 1         |
| Herpud1_j1       | 0.0561384 | 0 -1.79769e+308 |            | 0.116981  | 1         |
| Nlrc5_j2         | 0.264214  | 0.0792355       | -1.73749   | 0.0005071 | 0.0082367 |
| Nlrc5_j13        | 0.286207  | 0 -1.79769e+308 |            | 0.0003083 | 0.0054628 |

|             |             |                 |           |           |           |
|-------------|-------------|-----------------|-----------|-----------|-----------|
| XLOC_032481 | 0.174622    | 0.189472        | 0         | 1         | 1         |
| Ccl22       | 0.181032    | 0.104094        | -0.798357 | 0.357579  | 0.693483  |
| Polr2c_j1   | 0.167585    | 0.06649         | -1.33368  | 0.0719562 | 0.322462  |
| Gpr56_j6    | 0.527098    | 0.0082973       | 0         | 1         | 1         |
| Gpr97_j3    | 0.152359    | 0.0179632       | -3.08436  | 0.321224  | 0.664299  |
| Gpr97_j6    | 0.0649846   | 0 -1.79769e+308 | 0.0472881 |           | 1         |
| Gpr97_j8    | 0.0898772   | 0.116184        | 0.370387  | 0.750326  | 1         |
| Katnb1_j2   | 0.15992     | 0.124284        | -0.363712 | 0.386445  | 0.714571  |
| XLOC_032497 | 0.108021    | 0 -1.79769e+308 | 0.0086479 |           | 1         |
| Gins3_j2    | 0.469259    | 0.250297        | -0.906746 | 0.15209   | 0.483538  |
| Ndr4_j1     | 1.48483     | 0.958549        | 0         | 1         | 1         |
| Ndr4_j9     | 0.0540487   | 0.00832233      | 0         | 1         | 1         |
| Ndr4_j8     | 0.674052    | 0.396118        | 0         | 1         | 1         |
| XLOC_032505 | 0.213113    | 0 -1.79769e+308 | 4.11E-07  |           | 1.87E-05  |
| XLOC_032505 | 0.0658801   | 0 -1.79769e+308 | 0.0072268 |           | 1         |
| XLOC_032505 | 0.274179    | 0.0709708       | -1.94982  | 0.122374  | 0.435497  |
| XLOC_032505 | 0.000203838 | 0.280209        | 10.4249   | 0.728297  | 0.903676  |
| Bean1_j2    | 0.544562    | 0.526353        | 0         | 1         | 1         |
| Bean1       | 3.28217     | 3.43691         | 0         | 1         | 1         |
| XLOC_032507 | 0.146625    | 0.158247        | 0         | 1         | 1         |
| CKLF6_j3    | 0.00144236  | 0.216867        | 7.23223   | 0.0383101 | 0.217704  |
| CKLF6_j5    | 0.489705    | 0.412504        | -0.247503 | 0.458153  | 0.7608    |
| XLOC_032508 | 0.111899    | 0.147582        | 0.399328  | 0.619934  | 1         |
| Cmtm3       | 2.85618     | 3.38229         | 0.243911  | 0.287254  | 0.635532  |
| Pdp2_j2     | 0.241307    | 9.51E-05        | -11.3087  | 0.792379  | 0.930832  |
| Cbfb_j3     | 72.4762     | 60.2168         | 0         | 1         | 1         |
| Cbfb_j9     | 8.3452      | 5.87673         | 0         | 1         | 1         |
| Nol3_j1     | 13.9304     | 17.5853         | 0         | 1         | 1         |
| E2f4_j1     | 1.67627     | 1.92644         | 0.200689  | 0.50176   | 0.785778  |
| Elmo3_j6    | 0.534306    | 0.37479         | -0.511582 | 0.145204  | 0.473001  |
| Plekhg4_j7  | 0.125701    | 0.0170276       | -2.88405  | 0.0220345 | 1         |
| Lrrc36_j2   | 0.116546    | 0.0624412       | -0.900325 | 0.297517  | 1         |
| Rltpr_j1    | 0           | 0.179155        | 0         | 1         | 1         |
| Nutf2_j7    | 0.0670082   | 0 -1.79769e+308 | 0.0025373 |           | 1         |
| Edc4_j2     | 0.154138    | 0.536426        | 1.79916   | 1.70E-05  | 0.0004851 |
| Edc4_j1     | 1.05409     | 0.425493        | -1.30878  | 3.99E-05  | 0.0009853 |
| Nfatc3_j1   | 0.29271     | 0.0837417       | 0         | 1         | 1         |
| Nfatc3_j3   | 4.65132     | 4.61216         | 0         | 1         | 1         |
| Cdh3_j1     | 0.188584    | 0 -1.79769e+308 | 0.0003335 |           | 0.0058306 |
| Cdh3_j2     | 0.241595    | 0.0884357       | -1.44989  | 0.0633394 | 0.298501  |
| Cdh1_j2     | 0.829949    | 0.293527        | 0         | 1         | 1         |
| Cdh1_j5     | 0.0949003   | 0.0583          | 0         | 1         | 1         |
| Tmco7_j2    | 0.50566     | 0.791271        | 0.646004  | 0.0099556 | 0.0853736 |
| Tmco7_j1    | 0.111902    | 0 -1.79769e+308 | 2.69E-05  |           | 1         |
| Has3        | 0.329815    | 0.173146        | -0.929672 | 0.0134221 | 0.106366  |
| Sntb2_j1    | 0.491224    | 0.727449        | 0.566465  | 0.047724  | 0.250976  |
| Nfat5_j10   | 1.9341      | 1.30542         | -0.567144 | 0.000132  | 0.0027094 |

|                  |           |                 |           |           |           |
|------------------|-----------|-----------------|-----------|-----------|-----------|
| Zfhx3            | 0.78332   | 0.288266        | 0         | 1         | 1         |
| XLOC_032551      | 0.126848  | 0.0574073       | -1.1438   | 0.496857  | 1         |
| XLOC_032552      | 0.0779988 | 0 -1.79769e+308 |           | 0.0579967 | 1         |
| Pmfbp1_j6        | 0.186677  | 0 -1.79769e+308 |           | 1.53E-06  | 5.97E-05  |
| Pmfbp1_j7        | 0.183191  | 0.118169        | -0.632493 | 0.250451  | 0.598188  |
| Zfp821           | 0.988814  | 1.22089         | 0         | 1         | 1         |
| Ap1g1_j1         | 7.55124   | 7.24722         | 0         | 1         | 1         |
| Zfp612_j1        | 0.151855  | 0               | 0         | 1         | 1         |
| Hydin_j1         | 0.162035  | 0.0839402       | -0.948876 | 0.286959  | 0.635532  |
| mKIAA1990_j5     | 0.640855  | 0.702257        | 0         | 1         | 1         |
| XLOC_032577      | 0.112751  | 0.00260252      | -5.43709  | 0.503808  | 1         |
| Cntnap4_j2       | 0.121335  | 0 -1.79769e+308 |           | 8.27E-05  | 1         |
| Wwox_j3          | 0.137625  | 0.0646885       | -1.08916  | 0.392229  | 0.718577  |
| Bcmo1_j3         | 0.0560963 | 0.0145151       | -1.95035  | 1         | 1         |
| Gan_j1           | 7.65075   | 9.2308          | 0         | 1         | 1         |
| 4933407C03Rik_j5 | 0.447588  | 0               | 0         | 1         | 1         |
| Mlycd_j1         | 0.361737  | 0.303212        | -0.254616 | 0.455469  | 0.759228  |
| Klhl36_j2        | 0.229098  | 0.0268006       | -3.09563  | 0.0018003 | 0.0229889 |
| Usp10_j1         | 4.30478   | 4.16995         | 0         | 1         | 1         |
| Gse1_j9          | 0.0836909 | 0 -1.79769e+308 |           | 7.40E-05  | 1         |
| Gse1_j10         | 0.0755838 | 0 -1.79769e+308 |           | 0.0002357 | 1         |
| Irf8_j4          | 0.236115  | 0.0674903       | -1.80674  | 0.0936651 | 0.377114  |
| Banp_j1          | 2.61882   | 2.28872         | -0.194378 | 0.417056  | 0.734202  |
| Banp_j3          | 0.0870012 | 0.0145874       | -2.57631  | 0.158227  | 1         |
| Zfpm1_j4         | 0.237797  | 0.0923915       | -1.3639   | 0.0167455 | 0.124482  |
| Zc3h18_j1        | 0.353555  | 0.000175608     | -10.9754  | 0.784464  | 0.927523  |
| Zc3h18_j2        | 0.526601  | 0.350689        | -0.586516 | 0.158957  | 0.493426  |
| Cdt1_j1          | 0.142453  | 0 -1.79769e+308 |           | 2.46E-05  | 0.000654  |
| Cdt1_j4          | 0.285757  | 0.220041        | -0.37702  | 0.642888  | 0.862213  |
| Acsf3_j2         | 0.586802  | 0.0802079       | 0         | 1         | 1         |
| XLOC_032620      | 0.155212  | 0.127476        | 0         | 1         | 1         |
| Rpl13_j3         | 0.623223  | 0.56127         | 0         | 1         | 1         |
| Rpl13_j1         | 0         | 0.834974        | 0         | 1         | 1         |
| Cdk10_j2         | 5.20245   | 4.16284         | 0         | 1         | 1         |
| Zfp276_j2        | 0.628306  | 0.928559        | 0.563525  | 0.100251  | 0.391937  |
| Tcf25            | 10.6118   | 12.2271         | 0         | 1         | 1         |
| Tubb3_j1         | 1641.33   | 2279.94         | 0.474132  | 8.66E-05  | 0.0018968 |
| XLOC_032635      | 0.0715073 | 0.0480719       | -0.572896 | 0.63278   | 1         |
| Rab4a_j3         | 2.18157   | 0.120991        | 0         | 1         | 1         |
| mKIAA0133_j2     | 0.734225  | 0.934021        | 0         | 1         | 1         |
| Cog2_j1          | 0.765202  | 0.62286         | 0         | 1         | 1         |
| Arv1_j1          | 0.807722  | 0.883215        | 0         | 1         | 1         |
| Arv1_j7          | 2.20681   | 1.88976         | 0         | 1         | 1         |
| XLOC_032648      | 0.186438  | 0.108458        | 0         | 1         | 1         |
| Disc1_j7         | 0.071144  | 0.0498205       | -0.514002 | 0.731487  | 1         |
| XLOC_032657      | 0.230049  | 0.131485        | -0.80705  | 0.206284  | 0.550764  |
| Slc35f3_j2       | 1.73262   | 1.0596          | -0.709443 | 0.0074887 | 0.0692743 |

|                  |           |             |               |           |           |
|------------------|-----------|-------------|---------------|-----------|-----------|
| Slc35f3_j6       | 0.219651  | 0.0632255   | -1.79663      | 0.132934  | 0.453791  |
| Pard3_j6         | 0.249977  | 0           | -1.79769e+308 | 3.03E-10  | 2.78E-08  |
| XLOC_032660      | 0.179184  | 0.148612    | -0.269896     | 0.766447  | 0.920335  |
| Nrp1_j1          | 0.20168   | 0.0608406   | 0             | 1         | 1         |
| Nrp1_j5          | 0.663052  | 1.34929     | 0             | 1         | 1         |
| Insr_j1          | 0.117437  | 0.0378901   | -1.632        | 0.020158  | 1         |
| Xab2_j3          | 0.658303  | 0.892777    | 0.43955       | 0.260877  | 0.609759  |
| Timm44_j5        | 0.568336  | 0.0459202   | 0             | 1         | 1         |
| Gm7461           | 0.0658894 | 0.0392226   | -0.748362     | 0.709785  | 1         |
| Slc10a2          | 0.200891  | 0.0594166   | -1.75747      | 0.0703112 | 0.318545  |
| Efnb2_j2         | 1.97858   | 2.25533     | 0             | 1         | 1         |
| XLOC_032681      | 0.081308  | 0           | -1.79769e+308 | 0.0282204 | 1         |
| Fam155a_j7       | 3.58262   | 2.84898     | 0             | 1         | 1         |
| Cars2_j2         | 0.17545   | 0.658158    | 1.90737       | 0.0033315 | 0.037423  |
| Ankrd10_j7       | 1.68855   | 1.09231     | 0             | 1         | 1         |
| Ankrd10_j8       | 0.277741  | 0.243827    | 0             | 1         | 1         |
| Adprhl1_j1       | 0.916489  | 0.880641    | -0.0575645    | 0.867974  | 0.958191  |
| Dcun1d2_j2       | 4.3667    | 4.58462     | 0             | 1         | 1         |
| Rasa3_j2         | 0.345105  | 0.13481     | -1.35611      | 0.0409272 | 0.227301  |
| 2610019F03Rik_j3 | 7.68604   | 6.08282     | 0             | 1         | 1         |
| 2610019F03Rik_j1 | 5.92737   | 6.39845     | 0             | 1         | 1         |
| Csmd1_j2         | 0.141314  | 0           | -1.79769e+308 | 8.70E-08  | 4.74E-06  |
| Csmd1_j9         | 0.0348381 | 0.084598    | 1.27996       | 0.294964  | 1         |
| Csmd1_j14        | 0.18762   | 0.15661     | -0.260639     | 0.728885  | 0.903872  |
| Csmd1_j15        | 0.263979  | 0.31021     | 0.232822      | 0.585445  | 0.833935  |
| XLOC_032707      | 0.236576  | 0.104828    | -1.17427      | 0.196685  | 0.539469  |
| XLOC_032713      | 0.202137  | 0.110295    | -0.873967     | 0.431524  | 0.743686  |
| 6820431F20Rik_j3 | 14.6649   | 11.7925     | -0.314491     | 0.003859  | 0.0417966 |
| Atp7b_j1         | 0.0871047 | 0           | -1.79769e+308 | 0.0064864 | 1         |
| Nek3_j3          | 0.310249  | 0.0531729   | -2.54466      | 0.0404929 | 0.225635  |
| Ckap2_j4         | 0.314705  | 0.0662993   | -2.24693      | 0.0370538 | 0.213175  |
| Slc25a15_j2      | 0.0975486 | 0.0321263   | 0             | 1         | 1         |
| Vdac3_j10        | 0.167274  | 0.269303    | 0             | 1         | 1         |
| Vdac3_j9         | 3.41072   | 3.52562     | 0             | 1         | 1         |
| Vdac3_j11        | 4.43551   | 5.79857     | 0             | 1         | 1         |
| Ikbkb_j3         | 0.815003  | 0.842405    | 0             | 1         | 1         |
| Ikbkb            | 1.7217    | 2.17505     | 0             | 1         | 1         |
| Ap3m2_j2         | 0.416021  | 0.000270577 | 0             | 1         | 1         |
| Adam9_j6         | 0.431141  | 0.828603    | 0             | 1         | 1         |
| Adam9_j7         | 5.53157   | 1.37497     | 0             | 1         | 1         |
| Tacc1_j5         | 2.54783   | 1.70109     | 0             | 1         | 1         |
| Tacc1_j6         | 0.949165  | 0.751248    | 0             | 1         | 1         |
| Ddhd2_j4         | 3.20466   | 2.81895     | -0.185015     | 0.222545  | 0.56956   |
| 4930444A02Rik_j1 | 0.419249  | 0.438832    | 0.06586       | 0.842598  | 0.950263  |
| Hook3_j1         | 0.270646  | 0.0916961   | 0             | 1         | 1         |
| Chrna6_j3        | 6.43886   | 5.43511     | 0             | 1         | 1         |
| Nrg1_j6          | 2.43355   | 1.29594     | 0             | 1         | 1         |

|                  |           |                 |           |           |           |
|------------------|-----------|-----------------|-----------|-----------|-----------|
| Wrn_j3           | 0.106508  | 0.168013        | 0         | 1         | 1         |
| Leprot1_j3       | 1.37751   | 0.825386        | 0         | 1         | 1         |
| B930018H19_j2    | 0.182426  | 0.0177609       | -3.36053  | 0.0325648 | 0.196198  |
| Tnks_j2          | 15.9977   | 15.5525         | 0         | 1         | 1         |
| Dlc1_j1          | 3.39206   | 3.89435         | 0         | 1         | 1         |
| Mtus1_j6         | 0.611185  | 2.21252         | 0         | 1         | 1         |
| Tlr3_j5          | 0.0879807 | 0.0682214       | -0.366961 | 0.677548  | 1         |
| Tlr3_j6          | 0.271046  | 0.166546        | -0.702616 | 0.177503  | 0.516863  |
| 4930448N21Rik_j1 | 0.511983  | 0.266039        | 0         | 1         | 1         |
| D030016E14Rik_j1 | 0.12101   | 0.142798        | 0.238848  | 0.693853  | 1         |
| Odz3_j2          | 0.343135  | 0.0972067       | -1.81965  | 2.53E-05  | 0.0006711 |
| Odz3_j1          | 0.477685  | 0.00577653      | -6.36972  | 1.89E-05  | 0.0005303 |
| Odz3_j3          | 0.653017  | 0.538158        | -0.279092 | 0.23101   | 0.57801   |
| Wdr17_j8         | 2.0667    | 1.84011         | -0.167538 | 0.558987  | 0.820325  |
| BC088983_j3      | 0.0847896 | 0.0445663       | -0.927936 | 0.474242  | 1         |
| BC088983_j4      | 0.0875136 | 0.0173558       | -2.33409  | 0.163406  | 1         |
| Galnt7           | 0.133419  | 0.298591        | 1.1622    | 0.0209141 | 0.145317  |
| Galnt16_j2       | 0.230366  | 0.109651        | -1.07101  | 0.0888529 | 0.365281  |
| Clcn3            | 2.66842   | 2.52275         | 0         | 1         | 1         |
| Palld_j6         | 1.53392   | 2.25881         | 0         | 1         | 1         |
| Tll1_j1          | 0.0927784 | 0 -1.79769e+308 |           | 2.81E-05  | 1         |
| Npy5r            | 0.0875098 | 0 -1.79769e+308 |           | 0.0146961 | 1         |
| Psd3_j4          | 0.0646241 | 0.0232635       | 0         | 1         | 1         |
| Lzts1_j2         | 0.772104  | 0.733101        | 0         | 1         | 1         |
| Ndufa13_j1       | 1.0921    | 0.937403        | -0.220367 | 0.520076  | 0.797685  |
| Gatad2a_j11      | 0.236709  | 0.246525        | 0         | 1         | 1         |
| Ncan_j3          | 0.129007  | 0.096732        | 0         | 1         | 1         |
| Slc25a42         | 1.59208   | 1.79581         | 0.173722  | 0.409711  | 0.729962  |
| Upf1_j1          | 0.321855  | 0.279342        | -0.204382 | 0.43759   | 0.747793  |
| Tmem59l_j1       | 3.1376    | 5.22378         | 0         | 1         | 1         |
| Pgpep1_j1        | 0.187852  | 0.124217        | -0.596736 | 0.309663  | 0.654275  |
| Pik3r2_j3        | 2.4536    | 2.83941         | 0.21069   | 0.163162  | 0.498477  |
| Pik3r2_j5        | 0.134933  | 0.15114         | 0.163648  | 0.782996  | 1         |
| Pik3r2_j7        | 0.291532  | 0.148566        | -0.97255  | 0.13839   | 0.462556  |
| Mast3_j3         | 0.248573  | 0.07254         | -1.77682  | 0.0037331 | 0.0408592 |
| Kcnn1_j4         | 1.34332   | 0.844035        | 0         | 1         | 1         |
| Kcnn1_j5         | 0.134862  | 0.117504        | 0         | 1         | 1         |
| Ccdc124          | 15.6621   | 18.837          | 0         | 1         | 1         |
| Slc5a5_j2        | 0.106584  | 0.160115        | 0         | 1         | 1         |
| Gm15427_j9       | 7.19041   | 8.37929         | 0.220755  | 0.373505  | 0.706378  |
| Gm15427_j11      | 0.319945  | 0 -1.79769e+308 |           | 0.0112319 | 0.0934633 |
| Ushbp1_j7        | 0.244113  | 0.269561        | 0.143065  | 0.780028  | 0.925824  |
| Ano8_j2          | 0.674628  | 0.792791        | 0         | 1         | 1         |
| Tmem221_j2       | 0.0779873 | 0.00807972      | -3.27086  | 0.347241  | 1         |
| Unc13a_j5        | 3.843     | 4.96777         | 0         | 1         | 1         |
| Unc13a_j2        | 1.6409    | 1.75904         | 0         | 1         | 1         |
| B3gnt3           | 0.145596  | 0.209345        | 0.52391   | 0.160183  | 0.49471   |

|                  |           |                 |           |           |           |
|------------------|-----------|-----------------|-----------|-----------|-----------|
| Eps15l1          | 0.247105  | 0.225093        | 0         | 1         | 1         |
| Cherp_j1         | 6.54449   | 7.1953          | 0.136775  | 0.431014  | 0.743428  |
| Cherp_j2         | 6.88134   | 6.51291         | -0.079387 | 0.5245    | 0.800074  |
| 9130011J15Rik_j2 | 0.533112  | 0.0227836       | -4.54837  | 0.0027483 | 0.0321689 |
| 9130011J15Rik    | 2.1631    | 2.31887         | 0.100319  | 0.530374  | 0.803051  |
| Large_j3         | 18.4167   | 18.9045         | 0         | 1         | 1         |
| Rbmxrt           | 0.746123  | 0.95459         | 0         | 1         | 1         |
| Rbmxrt           | 1.86187   | 2.03403         | 0         | 1         | 1         |
| Lsm6_j7          | 2.91564   | 2.64121         | -0.142616 | 0.415113  | 0.733098  |
| 1700011L22Rik_j5 | 0.143549  | 0 -1.79769e+308 |           | 0.000814  | 0.012134  |
| Gab1_j1          | 5.5875    | 5.19373         | 0         | 1         | 1         |
| Il15_j1          | 0.117724  | 0.086202        | -0.449618 | 0.703682  | 1         |
| Zfp330_j5        | 0.298132  | 0.120153        | -1.31108  | 0.119001  | 0.42917   |
| Tecr_j5          | 8.16118   | 10.1641         | 0         | 1         | 1         |
| Tecr_j7          | 15.07     | 14.6523         | 0         | 1         | 1         |
| Cd97             | 0.33947   | 0.277           | -0.293395 | 0.396206  | 0.721006  |
| AK134933_j1      | 0.192614  | 0.23853         | 0.308454  | 0.679088  | 0.879469  |
| AK134933_j2      | 0.166749  | 0.060333        | -1.46666  | 0.190076  | 0.531884  |
| AK134933_j3      | 0.130341  | 0.0447592       | -1.54204  | 0.178619  | 1         |
| Dcaf15_j6        | 0.929394  | 1.24587         | 0.422796  | 0.106617  | 0.405655  |
| Cc2d1a_j2        | 0.0587459 | 0.00939874      | 0         | 1         | 1         |
| Ccdc130          | 1.58831   | 1.94592         | 0.292959  | 0.339753  | 0.679994  |
| Nacc1_j4         | 1.88478   | 0               | 0         | 1         | 1         |
| Nfix_j3          | 0.221797  | 0.0691561       | -1.68131  | 0.0153932 | 0.117147  |
| Nfix             | 0.56054   | 0.433458        | -0.370926 | 0.213625  | 0.558821  |
| Nfix             | 0.409758  | 0.626528        | 0.612605  | 0.0305791 | 0.188095  |
| Gcdh_j1          | 1.62713   | 1.3854          | 0         | 1         | 1         |
| Gcdh             | 2.44237   | 2.95167         | 0         | 1         | 1         |
| Wdr83_j1         | 0.231837  | 0.145819        | -0.668933 | 0.111754  | 0.41608   |
| Zfp791_j1        | 0.0748311 | 0.127743        | 0.771531  | 0.249767  | 1         |
| Vps35_j2         | 70.7608   | 69.7602         | -0.020545 | 0.811231  | 0.938053  |
| Abcc12_j7        | 0.126344  | 0.177146        | 0.48758   | 0.479892  | 0.773893  |
| Zfp423_j7        | 1.53555   | 0               | 0         | 1         | 1         |
| Brd7_j1          | 6.48337   | 7.45799         | 0.202044  | 0.116787  | 0.425014  |
| XLOC_032956      | 0.196886  | 0.111767        | -0.816871 | 0.124598  | 0.439858  |
| Rpgrip1_j4       | 1.03277   | 1.11289         | 0.107789  | 0.599701  | 0.841292  |
| Rpgrip1l         | 0.383534  | 0.250954        | -0.611934 | 0.0836383 | 0.352592  |
| Ces5a_j2         | 0.061175  | 0 -1.79769e+308 |           | 0.0249339 | 1         |
| Ces5a_j1         | 0.184065  | 0.0768931       | -1.25929  | 0.1882    | 0.529448  |
| XLOC_032964      | 0.156046  | 0.0181766       | -3.10181  | 0.285825  | 0.634576  |
| XLOC_032964      | 0.0731221 | 0.0418483       | -0.805141 | 0.425164  | 1         |
| XLOC_032964      | 0.0967022 | 0.0862478       | -0.165061 | 0.842978  | 1         |
| XLOC_032964      | 0.18141   | 0.0971946       | -0.900309 | 0.16755   | 0.504076  |
| Amfr_j1          | 6.66205   | 5.98096         | 0         | 1         | 1         |
| Fam192a_j4       | 0.40053   | 0               | 0         | 1         | 1         |
| Dok4_j4          | 8.43271   | 15.3865         | 0         | 1         | 1         |
| Kifc3_j3         | 0.638344  | 0.464456        | -0.458792 | 0.26065   | 0.609434  |

|                  |           |            |               |           |           |
|------------------|-----------|------------|---------------|-----------|-----------|
| Cnot1_j10        | 5.67778   | 6.10533    | 0             | 1         | 1         |
| Cnot1_j11        | 0.31411   | 0.282145   | 0             | 1         | 1         |
| Slc38a7_j1       | 2.44927   | 3.19551    | 0             | 1         | 1         |
| Slc38a7_j2       | 3.75511   | 4.37544    | 0             | 1         | 1         |
| Got2_j2          | 0.394272  | 0.299282   | 0             | 1         | 1         |
| Cdh8             | 1.02462   | 0.644419   | 0             | 1         | 1         |
| Cdh8_j2          | 0.120489  | 0.0319155  | 0             | 1         | 1         |
| Cdh8_j3          | 2.46845   | 2.19871    | 0             | 1         | 1         |
| Cdh11_j6         | 0.713827  | 0.373869   | 0             | 1         | 1         |
| XLOC_032992      | 0.0840641 | 0.0450949  | -0.898526     | 0.570614  | 1         |
| Dync1li2_j6      | 1.22105   | 0.116118   | 0             | 1         | 1         |
| Dync1li2_j7      | 0.182346  | 0.131999   | 0             | 1         | 1         |
| Ccdc79_j3        | 0.0635042 | 0.00986411 | -2.68659      | 0.313745  | 1         |
| Rrad_j1          | 0.0832371 | 0.0441722  | -0.914088     | 0.566352  | 1         |
| Fam96b_j2        | 5.67495   | 4.68954    | -0.275162     | 0.28236   | 0.630923  |
| B3gnt9-ps        | 0.0874388 | 0.0784969  | -0.155637     | 0.775016  | 1         |
| Tradd_j1         | 0.788796  | 0.0342487  | 0             | 1         | 1         |
| Tradd_j5         | 0.0596879 | 0          | 0             | 1         | 1         |
| Lrrc29_j6        | 0.16677   | 0.0602615  | -1.46855      | 0.229677  | 0.576806  |
| Lrrc29_j8        | 0.199657  | 0.0724813  | -1.46184      | 0.102972  | 0.397663  |
| Lrrc29_j9        | 0.0652155 | 0          | -1.79769e+308 | 0.0326384 | 1         |
| Lrrc29_j10       | 0.109561  | 0.111948   | 0.031094      | 0.975886  | 1         |
| Tppp3            | 262.489   | 290.123    | 0.144408      | 0.0984789 | 0.388     |
| Ranbp10          | 3.83457   | 3.80602    | 0             | 1         | 1         |
| Slc7a6os_j1      | 0.968214  | 1.00105    | 0.0481224     | 0.833079  | 0.946305  |
| Smpd3            | 5.26112   | 4.23949    | -0.311477     | 0.0082748 | 0.074505  |
| Nob1_j1          | 3.58494   | 3.31614    | -0.112444     | 0.6975    | 0.888592  |
| Psmc7_j2         | 27.3894   | 33.0132    | 0             | 1         | 1         |
| Dhodh_j3         | 0.977976  | 0.765818   | 0             | 1         | 1         |
| 2400003C14Rik_j3 | 0.0728844 | 0.370035   | 0             | 1         | 1         |
| Atxn1_j1         | 0.446075  | 0.443188   | 0             | 1         | 1         |
| Marveld3_j1      | 0.171847  | 0          | -1.79769e+308 | 0.001039  | 0.0147256 |
| XLOC_033041      | 0.258458  | 0.0840537  | -1.62055      | 0.0300313 | 0.185899  |
| Il34_j3          | 3.81166   | 2.1783     | 0             | 1         | 1         |
| Il34_j2          | 3.37453   | 3.50403    | 0             | 1         | 1         |
| Clec18a          | 0.668713  | 0.642063   | -0.0586742    | 0.881669  | 0.962494  |
| Mrc1_j7          | 0.326432  | 0          | -1.79769e+308 | 5.07E-06  | 0.0001713 |
| Glg1_j1          | 14.5372   | 12.3043    | 0             | 1         | 1         |
| Mkl_j4           | 0.0686728 | 0          | -1.79769e+308 | 0.0148906 | 1         |
| Mkl              | 0         | 0.134852   | 1.79769e+308  | 0.0063234 | 1         |
| Wdr59_j2         | 0.725338  | 0.580413   | 0             | 1         | 1         |
| Chst5_j1         | 1.4965    | 0.923857   | -0.695851     | 0.0270198 | 0.173494  |
| Adat1_j3         | 1.29489   | 0.834313   | -0.63417      | 0.0270358 | 0.173551  |
| Adat1            | 0.894668  | 1.01532    | 0.182503      | 0.548501  | 0.814203  |
| Kars_j1          | 2.15726   | 1.38157    | -0.642896     | 0.028137  | 0.177981  |
| Cdyl2_j1         | 0.0555189 | 0          | -1.79769e+308 | 0.0007169 | 1         |
| 2310061C15Rik_j1 | 0.470242  | 0.0920249  | -2.35331      | 2.42E-05  | 0.0006468 |



|                  |           |                 |           |           |          |
|------------------|-----------|-----------------|-----------|-----------|----------|
| Gcsh_j2          | 32.8829   | 33.3629         | 0         | 1         | 1        |
| Pkd1l2_j9        | 0.0745741 | 0.0297712       | -1.32476  | 0.356637  | 1        |
| Pkd1l2_j11       | 0.0976485 | 0.0866692       | -0.172078 | 0.869042  | 1        |
| Slc38a8_j1       | 0.22111   | 0.0506889       | -2.12502  | 0.0735979 | 0.326983 |
| Hsd1l_j1         | 2.46826   | 2.07309         | 0         | 1         | 1        |
| Zdhhc7_j2        | 3.11156   | 1.99111         | 0         | 1         | 1        |
| Zdhhc7_j1        | 1.49892   | 1.33608         | 0         | 1         | 1        |
| AK039624         | 1.91835   | 0.677429        | 0         | 1         | 1        |
| XLOC_033092      | 0.0991306 | 0 -1.79769e+308 | 0.0084053 |           | 1        |
| AK087264_j5      | 0.144006  | 0.025545        | -2.49502  | 0.173357  | 0.511133 |
| Fbxo31_j2        | 2.42467   | 0               | 0         | 1         | 1        |
| Fbxo31_j3        | 6.47603   | 5.12412         | 0         | 1         | 1        |
| Zcchc14_j8       | 0.181798  | 0.31306         | 0         | 1         | 1        |
| Fam38a_j3        | 0.512639  | 0.52534         | 0.0353066 | 0.889506  | 0.964965 |
| Galns_j4         | 0.272367  | 0 -1.79769e+308 | 0.0028013 | 0.0326175 | 0.991858 |
| Galns_j5         | 0.280163  | 0.284547        | 0.0224011 | 0.970996  | 0.991858 |
| Ankrd11_j2       | 13.0074   | 13.1246         | 0         | 1         | 1        |
| Sult5a1_j3       | 0.258871  | 0.0905545       | -1.51538  | 0.351695  | 0.688957 |
| Fanca_j4         | 0.376229  | 0.276592        | -0.443853 | 0.116396  | 0.424447 |
| XLOC_033123      | 0.0545224 | 0 -1.79769e+308 | 0.1559    |           | 1        |
| XLOC_033123      | 0.127372  | 0.0695426       | -0.873078 | 0.365413  | 1        |
| 2310022B05Rik_j1 | 14.0839   | 14.0923         | 0         | 1         | 1        |
| Ttc13_j2         | 2.27182   | 1.75515         | 0         | 1         | 1        |
| Ttc13_j1         | 0.949611  | 0.513438        | 0         | 1         | 1        |
| Pcnxl2_j5        | 3.80918   | 2.52813         | 0         | 1         | 1        |
| Tarbp1_j2        | 0.607299  | 0.440523        | -0.463189 | 0.191733  | 0.533938 |
| Pnpla6_j2        | 0.289805  | 0               | 0         | 1         | 1        |
| Pnpla6_j3        | 2.11061   | 1.92322         | 0         | 1         | 1        |
| 2310057J16Rik_j1 | 1.89742   | 1.58535         | 0         | 1         | 1        |
| 2310057J16Rik_j6 | 6.14202   | 6.66808         | 0         | 1         | 1        |
| Stxbp2_j5        | 0.104774  | 0.124589        | 0         | 1         | 1        |
| Evi5l_j1         | 13.0013   | 16.159          | 0         | 1         | 1        |
| Lass4_j6         | 10.6293   | 11.0978         | 0         | 1         | 1        |
| Ing1             | 0.443986  | 0.635781        | 0.518016  | 0.305048  | 0.65013  |
| 4931415C17Rik_j2 | 0         | 0.0829848       | 0         | 1         | 1        |
| Atp11a_j1        | 8.5717    | 6.45983         | 0         | 1         | 1        |
| Cul4a_j3         | 3.74598   | 3.71509         | 0         | 1         | 1        |
| XLOC_032169      | 0.0898112 | 0.054865        | 0         | 1         | 1        |
| Lamp1_j3         | 62.9153   | 57.1307         | 0         | 1         | 1        |
| Tfdp1_j11        | 0.0920463 | 0.165554        | 0.846873  | 0.250669  | 0.598474 |
| Fbxo25_j1        | 0.329035  | 0.303865        | -0.114811 | 0.725436  | 0.902457 |
| Arhgef10_j3      | 0.0825212 | 0.0420587       | 0         | 1         | 1        |
| Kbtbd11_j1       | 0.103745  | 2.18522         | 0         | 1         | 1        |
| Myom2_j1         | 0.102253  | 0.201127        | 0.975967  | 0.209595  | 0.553869 |
| XLOC_032189      | 0.0601619 | 0.110713        | 0.879902  | 0.301364  | 1        |
| XLOC_032189      | 0.0539133 | 0.167144        | 1.63238   | 0.192215  | 0.534433 |
| XLOC_032197      | 0.776535  | 1.09983         | 0.502158  | 0.321228  | 0.664299 |

|               |           |           |              |           |           |
|---------------|-----------|-----------|--------------|-----------|-----------|
| BC035532_j1   | 0         | 0.119103  | 1.79769e+308 | 0.0846583 | 1         |
| Myst3_j5      | 6.86E-05  | 0.226848  |              | 0 1       | 1         |
| Ank1_j1       | 11.1317   | 4.99788   |              | 0 1       | 1         |
| Ank1_j10      | 30.1534   | 24.3714   |              | 0 1       | 1         |
| Zmat4_j3      | 1.11635   | 1.90181   |              | 0 1       | 1         |
| Fgfr1_j6      | 0.608706  | 0.733885  |              | 0 1       | 1         |
| Fgfr1_j8      | 13.6537   | 15.0758   |              | 0 1       | 1         |
| Whsc1l1_j4    | 0.0165149 | 0.047065  | 1.51089      | 0.0943462 | 1         |
| Star          | 0.625547  | 1.46818   | 1.23084      | 4.73E-11  | 5.15E-09  |
| Rnf170_j1     | 0.328077  | 0.316079  | -0.0537493   | 0.959487  | 0.988456  |
| Rnf170_j4     | 0.0776499 | 0.129819  | 0.741445     | 0.331143  | 1         |
| XLOC_032229   | 0.0812604 | 0.161478  | 0.990713     | 0.179649  | 0.519346  |
| BC019943_j1   | 0.314707  | 0.403319  | 0.357913     | 0.456781  | 0.760049  |
| BC019943      | 0.352694  | 0.262005  | -0.428819    | 0.226586  | 0.573689  |
| Tmem66_j3     | 0.0853018 | 0.137701  | 0            | 1         | 1         |
| Tmem66_j2     | 0.584045  | 1.40322   | 0            | 1         | 1         |
| Tusc3_j8      | 0.0561415 | 3.95026   | 0            | 1         | 1         |
| Tusc3_j9      | 0.511182  | 0.353103  | 0            | 1         | 1         |
| Zdhhc2_j1     | 4.24685   | 4.2893    | 0.014352     | 0.934522  | 0.979958  |
| Pcm1_j2       | 1.8527    | 2.64029   | 0            | 1         | 1         |
| Sorbs2_j13    | 1.95864   | 1.79808   | 0            | 1         | 1         |
| Irf2_j1       | 0.0751776 | 0.635217  | 3.07887      | 0.0191993 | 0.137057  |
| Enpp6         | 0.116962  | 0.420311  | 1.84542      | 0.19409   | 0.536428  |
| AK032387_j5   | 0.027996  | 0.0601602 | 1.10359      | 0.505459  | 1         |
| Vegfc_j2      | 0.031584  | 0.0666017 | 1.07637      | 0.50934   | 1         |
| Vegfc         | 0.0240209 | 0.0476558 | 0.98836      | 0.617753  | 1         |
| Hpgd_j1       | 0.068933  | 0.16006   | 1.21535      | 0.303254  | 0.64898   |
| AK141659_j2   | 0.0442432 | 0.0837022 | 0.919809     | 0.458696  | 1         |
| Mfap3l_j1     | 2.69536   | 7.13272   | 0            | 1         | 1         |
| XLOC_032307   | 0.0516029 | 0.30692   | 2.57234      | 0.174978  | 0.513242  |
| 2700029M09Rik | 1.30654   | 1.55523   | 0.251372     | 0.526951  | 0.801327  |
| Ddx60_j1      | 0.0407798 | 0.118373  | 1.53741      | 0.200705  | 1         |
| Ddx60_j2      | 0         | 0.0563742 | 1.79769e+308 | 0.0456003 | 1         |
| Ddx60_j8      | 0         | 0.0474789 | 1.79769e+308 | 0.0853219 | 1         |
| Spock3_j2     | 0.0499366 | 0.209792  | 2.07079      | 0.114115  | 0.420249  |
| XLOC_032317   | 0.0835483 | 0.159418  | 0.93213      | 0.324051  | 0.667132  |
| Ints10_j10    | 3.86813   | 4.61122   | 0            | 1         | 1         |
| Ints10_j11    | 2.22703   | 2.03324   | 0            | 1         | 1         |
| Zfp930_j2     | 2.13404   | 1.98302   | 0            | 1         | 1         |
| Zfp964_j1     | 0.526256  | 0.24761   | -1.08769     | 0.0035985 | 0.0398023 |
| Atp13a1_j8    | 4.95263   | 5.26461   | 0            | 1         | 1         |
| Gmip_j3       | 0.344772  | 0.578476  | 0.746615     | 0.0794826 | 0.342405  |
| Gmip          | 0.531544  | 0.755898  | 0.508003     | 0.149367  | 0.478596  |
| Hapln4_j3     | 2.86392   | 1.84142   | 0            | 1         | 1         |
| Sugp2_j4      | 0.358871  | 0.436344  | 0            | 1         | 1         |
| Sugp2_j3      | 0.786765  | 1.49146   | 0            | 1         | 1         |
| Crlf1_j7      | 0.0394242 | 0.239069  | 2.60028      | 0.0572674 | 0.280461  |

|             |            |           |              |           |           |
|-------------|------------|-----------|--------------|-----------|-----------|
| Fkbp8_j1    | 0.588493   | 0.492793  | 0            | 1         | 1         |
| Fkbp8_j3    | 0          | 0.0973332 | 0            | 1         | 1         |
| Fkbp8_j7    | 0          | 0.147074  | 0            | 1         | 1         |
| Isyna1_j1   | 0.226508   | 0.175956  | -0.364349    | 0.618361  | 0.850061  |
| XLOC_032353 | 0.135922   | 0.142561  | 0.0687981    | 0.86999   | 1         |
| XLOC_032353 | 0.0787775  | 0.0734855 | -0.100325    | 0.924964  | 1         |
| Pde4c_j6    | 0.353194   | 0.334748  | -0.0773868   | 0.847159  | 0.951638  |
| Pde4c_j13   | 1.12432    | 1.23032   | 0.129988     | 0.594866  | 0.838618  |
| Pde4c_j22   | 0          | 0.44541   | 1.79769e+308 | 1.67E-05  | 0.000479  |
| Mtap1s_j2   | 0.940321   | 0.755519  | -0.315685    | 0.168179  | 0.504849  |
| Mtap1s_j3   | 0.771827   | 0.878009  | 0.185959     | 0.567275  | 0.824855  |
| Myo9b_j5    | 0.546797   | 0.578871  | 0.082238     | 0.760274  | 0.917459  |
| Myo9b_j7    | 0.868029   | 1.44155   | 0.731808     | 0.0011636 | 0.0161276 |
| Myo9b_j8    | 0.163426   | 0.778097  | 2.25131      | 1.09E-08  | 7.57E-07  |
| Myo9b_j13   | 0.722519   | 0.738478  | 0.0315211    | 0.88477   | 0.963475  |
| Use1_j1     | 5.97773    | 5.56547   | -0.103093    | 0.602513  | 0.842947  |
| Ankle1_j1   | 0.0751719  | 0.12945   | 0.784124     | 0.360377  | 1         |
| Fam125a_j3  | 1.04428    | 0.983678  | -0.0862541   | 0.859385  | 0.955525  |
| Fam125a_j2  | 0.736088   | 0.627955  | -0.229217    | 0.664931  | 0.873063  |
| Slc27a1_j3  | 0.534636   | 0.453873  | -0.236269    | 0.626035  | 0.854009  |
| Slc27a1_j4  | 1.94607    | 1.93154   | -0.0108073   | 0.940556  | 0.981947  |
| Slc27a1_j10 | 0.511452   | 1.07491   | 1.07155      | 2.70E-07  | 1.30E-05  |
| Slc27a1_j14 | 0.0411923  | 0.0579066 | 0.491351     | 0.440646  | 1         |
| Pgls_j2     | 19.8023    | 23.1038   | 0.222459     | 0.173444  | 0.511266  |
| Fam129c_j8  | 0.0518725  | 0.178587  | 1.78359      | 0.0884624 | 0.364324  |
| Fam129c_j9  | 0.109014   | 0.0911697 | -0.257891    | 0.799109  | 1         |
| Fam129c_j10 | 0.161308   | 0.257236  | 0.673276     | 0.427478  | 0.741759  |
| Glt25d1_j1  | 0          | 0.0740773 | 1.79769e+308 | 0.0025192 | 1         |
| Jak3_j8     | 0.388649   | 0.412194  | 0.0848557    | 0.819327  | 0.941494  |
| Zfp709_j2   | 0.214657   | 0.0869341 | -1.30404     | 0.0419495 | 0.231266  |
| Zfp882      | 0.431703   | 0.254541  | 0            | 1         | 1         |
| Zfp617_j4   | 0          | 0.0972451 | 0            | 1         | 1         |
| Zfp617_j6   | 0          | 0.165321  | 0            | 1         | 1         |
| XLOC_032374 | 0.150689   | 0.209871  | 0            | 1         | 1         |
| mszf37      | 0.17464    | 0.376021  | 1.10643      | 0.0548354 | 0.273143  |
| Zfp961_j2   | 0.153615   | 0.269465  | 0.810775     | 0.158487  | 0.492691  |
| XLOC_032377 | 0.0280782  | 0.0546247 | 0.960104     | 0.511664  | 1         |
| Ap1m1_j1    | 0.195676   | 0.123909  | -0.659188    | 0.52309   | 0.799177  |
| Ap1m1_j2    | 0          | 6.9967    | 1.79769e+308 | 1.91E-21  | 5.53E-19  |
| Nwd1_j6     | 0.0889634  | 0.0874004 | -0.025571    | 0.961649  | 1         |
| XLOC_032388 | 0.00642579 | 0.0552964 | 0            | 1         | 1         |
| Hmgxb4_j8   | 0.119711   | 0.146349  | 0            | 1         | 1         |
| Tom1_j6     | 0.0993616  | 0.137585  | 0.469563     | 0.326024  | 1         |
| Nr3c2_j2    | 0.296834   | 0.298134  | 0            | 1         | 1         |
| XLOC_032400 | 0.0723399  | 0.100531  | 0.474783     | 0.5136    | 1         |
| Slc10a7_j1  | 1.59423    | 0.981922  | 0            | 1         | 1         |
| Otud4_j4    | 1.21298    | 1.86224   | 0            | 1         | 1         |

|               |             |           |              |           |           |
|---------------|-------------|-----------|--------------|-----------|-----------|
| Inpp4b_j2     | 0           | 0.186707  | 1.79769e+308 | 0.013822  | 0.108518  |
| Inpp4b_j8     | 0           | 0.0601089 | 1.79769e+308 | 0.0706337 | 1         |
| XLOC_032410   | 0.283149    | 0.275458  | -0.0397251   | 0.930274  | 0.978636  |
| Clgn_j1       | 1.13995     | 1.17112   | 0            | 1         | 1         |
| Dnajb1        | 19.0997     | 20.1633   | 0.0781785    | 0.454294  | 0.75862   |
| Gipc1_j3      | 9.51751     | 11.9882   | 0            | 1         | 1         |
| Lphn1_j3      | 1.88871     | 2.47281   | 0            | 1         | 1         |
| Asf1b_j1      | 0.276338    | 0.412106  | 0.57658      | 0.361024  | 0.695733  |
| Rfx1_j1       | 0.832137    | 0.776491  | -0.0998524   | 0.643533  | 0.862499  |
| Rfx1_j3       | 0.183409    | 0.363729  | 0.987798     | 0.0022422 | 0.0272606 |
| Podnl1_j1     | 0.0272489   | 0.052087  | 0.934727     | 0.552792  | 1         |
| 4930432K21Rik | 0.104755    | 0.220667  | 1.07486      | 0.127739  | 0.445378  |
| Cacna1a_j11   | 2.52382     | 3.59576   | 0            | 1         | 1         |
| Syce2_j2      | 1.61364     | 1.37771   | 0            | 1         | 1         |
| Dnase2a       | 0.322721    | 0.423497  | 0            | 1         | 1         |
| Dnase2a_j1    | 0.315048    | 0.31317   | 0            | 1         | 1         |
| Prdx2_j1      | 57.7128     | 57.1025   | 0            | 1         | 1         |
| Hook2         | 0.215089    | 0.674172  | 1.64818      | 0.0003505 | 0.0060585 |
| Tnpo2         | 0.0625742   | 0.0904637 | 0.531772     | 0.605644  | 1         |
| Dhps_j4       | 0.455394    | 0.770116  | 0.75796      | 0.0552896 | 0.274555  |
| Heatr3_j1     | 2.60876     | 3.19282   | 0.291467     | 0.228832  | 0.575849  |
| Nod2_j2       | 1.68E-05    | 0.161655  | 13.2322      | 0.962073  | 0.989381  |
| Nod2_j7       | 0           | 0.122006  | 1.79769e+308 | 0.0020541 | 1         |
| Cyld_j1       | 0.000141348 | 0.292759  | 0            | 1         | 1         |
| Cyld_j4       | 0.904041    | 0.941675  | 0            | 1         | 1         |
| Cyld_j7       | 0.306562    | 0.40737   | 0            | 1         | 1         |
| XLOC_032460   | 0.0119461   | 0.0570207 | 2.25494      | 0.396758  | 1         |
| Chd9_j3       | 0.688486    | 0.6682    | -0.043148    | 0.974596  | 0.992758  |
| Chd9_j6       | 0.314884    | 0.43806   | 0.476306     | 0.0601498 | 0.288809  |
| Chd9_j9       | 0.0292605   | 0.11277   | 1.94636      | 0.0011414 | 1         |
| Fto_j4        | 0.0056869   | 1.07433   | 0            | 1         | 1         |
| Gnao1         | 7.76039     | 6.79094   | 0            | 1         | 1         |
| Gnao1_j6      | 0           | 0.0907259 | 0            | 1         | 1         |
| Nup93_j1      | 0.231748    | 0.24338   | 0            | 1         | 1         |
| Nup93_j5      | 2.75363     | 2.52584   | 0            | 1         | 1         |
| Nup93_j10     | 0           | 2.26285   | 0            | 1         | 1         |
| Slc12a3_j2    | 0.0866105   | 0.167597  | 0            | 1         | 1         |
| Slc12a3_j4    | 0.233119    | 0.880906  | 0            | 1         | 1         |
| XLOC_032475   | 0.0235887   | 0.050877  | 0            | 1         | 1         |
| Nlrc5_j1      | 0           | 0.19027   | 1.79769e+308 | 3.56E-07  | 1.65E-05  |
| Nlrc5_j12     | 0.146936    | 0.32409   | 1.1412       | 0.0820931 | 0.349173  |
| Cpne2_j1      | 10.0919     | 13.6547   | 0.436198     | 0.0105022 | 0.0886475 |
| Rspry1        | 0.1344      | 0.240597  | 0.840091     | 0.269001  | 0.618001  |
| Arl2bp_j2     | 19.3472     | 22.0125   | 0            | 1         | 1         |
| Gins3_j1      | 2.66403     | 2.44825   | -0.121859    | 0.525501  | 0.800798  |
| Ndr4_j3       | 71.8043     | 56.1438   | 0            | 1         | 1         |
| Ndr4_j4       | 1.25125     | 1.58961   | 0            | 1         | 1         |

|                  |             |                       |            |           |           |
|------------------|-------------|-----------------------|------------|-----------|-----------|
| Setd6_j2         | 0.0396985   | 0.118388              | 0          | 1         | 1         |
| XLOC_032505      | 0           | 0.113932 1.79769e+308 | 0.0039723  |           | 1         |
| Bean1_j1         | 9.12303     | 10.4889               | 0          | 1         | 1         |
| Bean1_j8         | 4.98003     | 5.4676                | 0          | 1         | 1         |
| XLOC_032507      | 0.0479626   | 0.0698357             | 0          | 1         | 1         |
| Car7_j1          | 0.312105    | 0.636279              | 1.02763    | 0.0468286 | 0.248242  |
| Pdp2_j1          | 0.119699    | 0.502999              | 2.07114    | 1.15E-06  | 4.63E-05  |
| Cbfb_j2          | 0.435263    | 0.416331              | 0          | 1         | 1         |
| Cbfb_j7          | 1.03276     | 1.2501                | 0          | 1         | 1         |
| Cbfb_j10         | 11.109      | 10.6158               | 0          | 1         | 1         |
| Cbfb_j11         | 0.108074    | 0.562763              | 0          | 1         | 1         |
| Hsf4_j1          | 0.295462    | 0.178969              | 0          | 1         | 1         |
| Tmem208_j1       | 13.569      | 13.949                | 0          | 1         | 1         |
| Slc9a5_j6        | 0.811674    | 0.612863              | -0.405336  | 0.1627    | 0.498065  |
| Slc9a5_j5        | 1.29472     | 0.92568               | -0.484055  | 0.048902  | 0.254717  |
| Plekhg4_j1       | 0.0493912   | 0.109861              | 1.15336    | 0.0776857 | 1         |
| Fam65a_j1        | 7.83126     | 8.35673               | 0          | 1         | 1         |
| Rltpr_j6         | 9.80237     | 9.12595               | 0          | 1         | 1         |
| Nrn1_l_j1        | 0.109444    | 0.108049              | -0.01852   | 0.988547  | 1         |
| Dus2_l_j2        | 0.282679    | 0.732797              | 0          | 1         | 1         |
| AK015813         | 0.168207    | 0.370965              | 1.14105    | 0.367636  | 0.701064  |
| Nfat5_j2         | 0           | 0.160559 1.79769e+308 | 3.84E-07   | 1.76E-05  |           |
| Pmfbp1_j4        | 0.131554    | 0.0495665             | -1.40822   | 0.240304  | 1         |
| Pmfbp1_j10       | 0.505247    | 0.0843886             | -2.58187   | 0.0272549 | 0.174421  |
| Zfp821           | 0.493119    | 0.695404              | 0          | 1         | 1         |
| Ap1g1_j2         | 3.67231     | 4.4522                | 0          | 1         | 1         |
| Phlpp2_j1        | 0           | 0.147818              | 0          | 1         | 1         |
| XLOC_032558      | 0.0989993   | 0.0994735             | 0.00689359 | 0.996101  | 1         |
| St3gal2_j2       | 12.6436     | 11.3771               | 0          | 1         | 1         |
| mKIAA1990_j3     | 0           | 0.090418              | 0          | 1         | 1         |
| Gabarapl2_j2     | 0.202908    | 0.166465              | -0.285613  | 0.624004  | 0.853123  |
| Cntnap4_j1       | 0           | 0.289787 1.79769e+308 | 8.10E-05   | 0.0017926 |           |
| XLOC_032577      | 0.0791164   | 0.208553              | 1.39836    | 0.0586772 | 0.284705  |
| Vat1_l_j2        | 0.0120475   | 0.0728139             | 0          | 1         | 1         |
| Bcmo1_j4         | 0.0297794   | 0.0925975             | 1.63666    | 0.361539  | 1         |
| 4933407C03Rik_j3 | 0           | 0.638247              | 0          | 1         | 1         |
| 4933407C03Rik_j6 | 13.4321     | 17.1861               | 0          | 1         | 1         |
| Plcg2_j7         | 0           | 0.302762 1.79769e+308 | 0.0038906  | 0.042075  |           |
| Osgin1_j1        | 0.0291767   | 0.872824              | 4.9028     | 9.18E-05  | 0.0019972 |
| Wfdc1_j1         | 0.061326    | 0.403862              | 2.71929    | 0.0145866 | 0.112631  |
| Crispld2_j2      | 1.02769     | 1.94234               | 0          | 1         | 1         |
| Gse1_j1          | 0.280788    | 0.147384              | -0.929902  | 0.0231653 | 0.155908  |
| Gse1_j7          | 0.000454235 | 0.110128              | 7.92153    | 0.198372  | 1         |
| Cox4i1           | 43.7146     | 56.7377               | 0          | 1         | 1         |
| Banp_j8          | 0.482793    | 1.11555               | 1.20828    | 0.004432  | 0.046424  |
| Zfpm1_j1         | 1.04705     | 0.893605              | -0.228619  | 0.353114  | 0.689667  |
| Ctu2_j2          | 2.85982     | 3.08756               | 0.110543   | 0.645843  | 0.863424  |

|                  |           |           |              |           |           |
|------------------|-----------|-----------|--------------|-----------|-----------|
| Acsf3_j1         | 0.307783  | 0.309667  | 0            | 1         | 1         |
| XLOC_032621      | 0.10486   | 0.115088  | 0.134272     | 0.882731  | 1         |
| Spg7_j3          | 7.58803   | 11.1791   | 0            | 1         | 1         |
| Zfp276_j5        | 0.0612734 | 0.0255548 | -1.26167     | 0.177646  | 1         |
| Tcf25_j3         | 80.2443   | 81.1106   | 0            | 1         | 1         |
| XLOC_032636      | 0.0670054 | 0.0707391 | 0            | 1         | 1         |
| Afg3l1_j2        | 0.07411   | 0.422638  | 0            | 1         | 1         |
| AK086660_j1      | 0.05695   | 0.0884389 | 0.634987     | 0.588943  | 1         |
| Rab4a_j4         | 17.9974   | 17.7045   | 0            | 1         | 1         |
| Galnt2_j2        | 0.673392  | 0.918282  | 0            | 1         | 1         |
| Galnt2_j3        | 0.913461  | 2.83897   | 0            | 1         | 1         |
| Capn9_j2         | 0.340963  | 0.428558  | 0            | 1         | 1         |
| Gnpat_j1         | 2.78073   | 2.56567   | -0.116132    | 0.361492  | 0.696104  |
| Gm505_j1         | 0.0419893 | 0.0742398 | 0.822173     | 0.399596  | 1         |
| Tsnax_j1         | 4.53296   | 5.5969    | 0            | 1         | 1         |
| Kcnk1_j4         | 26.2711   | 14.5588   | -0.85159     | 4.24E-14  | 7.46E-12  |
| Slc35f3_j5       | 1.04621   | 0.492601  | -1.08668     | 0.0101528 | 0.0864621 |
| Pard3_j4         | 0.265626  | 0.371559  | 0.484191     | 0.175355  | 0.51373   |
| XLOC_032660      | 0.221012  | 0.130406  | -0.761116    | 0.222272  | 0.569443  |
| XLOC_032660      | 1.25E-05  | 0.052038  | 12.021       | 0.984967  | 1         |
| Nrp1             | 1.68811   | 1.83147   | 0            | 1         | 1         |
| Itgb1_j1         | 0.178035  | 0.300357  | 0.754516     | 0.175946  | 0.514547  |
| Cd209a_j1        | 0.162232  | 0.425424  | 1.39084      | 0.133252  | 0.454201  |
| Ankrd10_j4       | 0.141379  | 0.76195   | 0            | 1         | 1         |
| Ankrd10_j5       | 1.24561   | 1.68087   | 0            | 1         | 1         |
| Gm6524           | 0.543826  | 0.65771   | 0.274306     | 0.417693  | 0.734715  |
| Tubgcp3_j4       | 1.13925   | 1.29483   | 0            | 1         | 1         |
| Tubgcp3_j3       | 0         | 0.19555   | 0            | 1         | 1         |
| Tubgcp3_j5       | 2.76676   | 2.59087   | 0            | 1         | 1         |
| 2610019F03Rik_j2 | 0.896139  | 1.25418   | 0            | 1         | 1         |
| Erich1_j1        | 0.660628  | 1.04366   | 0            | 1         | 1         |
| Nek3_j2          | 0.960792  | 1.1794    | 0.295751     | 0.485936  | 0.777386  |
| Slc25a15_j1      | 0.67758   | 0.937331  | 0            | 1         | 1         |
| Vdac3_j3         | 0.127429  | 0.226814  | 0            | 1         | 1         |
| Adam5_j4         | 0         | 0.280208  | 1.79769e+308 | 4.36E-05  | 0.0010623 |
| Adam32_j1        | 0.158255  | 0.0904384 | -0.807245    | 0.450323  | 0.756063  |
| Adam32_j2        | 0.080323  | 0.117105  | 0.543922     | 0.620711  | 1         |
| Adam9_j3         | 0.470783  | 0.673848  | 0            | 1         | 1         |
| Adam9_j4         | 0.101412  | 0.0837823 | 0            | 1         | 1         |
| Plekha2_j3       | 0         | 0.75697   | 0            | 1         | 1         |
| Tacc1_j7         | 1.15267   | 1.08854   | 0            | 1         | 1         |
| Tacc1_j4         | 0.13042   | 0.139502  | 0            | 1         | 1         |
| Letm2            | 0.196441  | 0         | 0            | 1         | 1         |
| Letm2_j7         | 1.06615   | 0.862998  | 0            | 1         | 1         |
| Hgsnat_j2        | 22.5875   | 19.4902   | 0            | 1         | 1         |
| 4930444A02Rik_j3 | 9.50524   | 9.2307    | -0.0422828   | 0.733214  | 0.905831  |
| XLOC_032747      | 0.181737  | 0.162518  | -0.161259    | 0.847598  | 0.951788  |

|                  |             |           |              |           |           |
|------------------|-------------|-----------|--------------|-----------|-----------|
| Adrb3_j2         | 0.035476    | 0.198476  | 2.48405      | 0.162837  | 0.498174  |
| Chrna6_j8        | 0.482382    | 0.976975  | 0            | 1         | 1         |
| Chrna6_j9        | 0.915126    | 0.816423  | 0            | 1         | 1         |
| Unc5d_j2         | 0.0966022   | 0.16915   | 0.808173     | 0.210475  | 0.55502   |
| XLOC_032755      | 0.0856512   | 0.111609  | 0.38191      | 0.748974  | 1         |
| XLOC_032757      | 0.132042    | 0.133232  | 0.0129362    | 0.987225  | 1         |
| Rbpms            | 0.187165    | 0.598327  | 1.67663      | 0.0297545 | 0.18472   |
| Tnks_j1          | 1.07671     | 1.23079   | 0            | 1         | 1         |
| Sgcz_j2          | 0.902871    | 0.748046  | -0.271392    | 0.162646  | 0.498056  |
| Fgl1_j3          | 0.0491703   | 0.201022  | 2.0315       | 0.257102  | 0.605894  |
| Asah1_j1         | 0.0448036   | 0.169388  | 0            | 1         | 1         |
| Asah1_j2         | 0.420675    | 0.490415  | 0            | 1         | 1         |
| Tlr3_j2          | 0           | 0.0908626 | 1.79769e+308 | 0.0113521 | 1         |
| 1700029J07Rik_j1 | 0           | 0.0597037 | 1.79769e+308 | 0.112878  | 1         |
| Snx25_j4         | 0           | 0.0770176 | 0            | 1         | 1         |
| Snx25_j3         | 0.0228758   | 0.154779  | 0            | 1         | 1         |
| Ccdc111_j3       | 0           | 0.351394  | 1.79769e+308 | 5.36E-05  | 0.0012663 |
| Stox2_j1         | 0.000478412 | 0.40039   | 0            | 1         | 1         |
| Stox2_j2         | 1.45152     | 1.49364   | 0            | 1         | 1         |
| D030016E14Rik_j2 | 7.9493      | 9.5073    | 0.258209     | 0.148734  | 0.477543  |
| Ing2_j2          | 2.27058     | 2.76602   | 0.284751     | 0.198536  | 0.541683  |
| Wwc2_j2          | 0.35331     | 0.621509  | 0            | 1         | 1         |
| BC088983_j2      | 0.282563    | 0.281161  | -0.00717976  | 0.988819  | 0.996606  |
| Pald_j1          | 0           | 0.689294  | 0            | 1         | 1         |
| Psd3_j1          | 1.70901     | 1.35013   | 0            | 1         | 1         |
| Csgalnact1_j1    | 1.88653     | 1.77625   | 0            | 1         | 1         |
| Csgalnact1_j2    | 0           | 0.400317  | 0            | 1         | 1         |
| Slc18a1_j1       | 0.133602    | 0.31522   | 1.23842      | 0.0373344 | 0.214212  |
| XLOC_032828      | 0.0904394   | 0.16138   | 0.835443     | 0.398888  | 0.72264   |
| XLOC_032830      | 0           | 0.238829  | 1.79769e+308 | 0.0528088 | 0.267012  |
| Zfp866_j2        | 0.385859    | 0.574001  | 0.572981     | 0.220132  | 0.56698   |
| Gatad2a_j1       | 0           | 0.107747  | 0            | 1         | 1         |
| Ncan_j1          | 0.774753    | 1.58224   | 0            | 1         | 1         |
| Rfxank_j1        | 0.26309     | 0.248144  | -0.0843748   | 0.808045  | 0.936871  |
| Crtc1_j3         | 3.12474     | 3.53155   | 0            | 1         | 1         |
| Crtc1_j6         | 1.50468     | 1.62643   | 0            | 1         | 1         |
| Ssbp4_j1         | 0.13084     | 0.149443  | 0            | 1         | 1         |
| Mpv17l2_j2       | 5.98089     | 6.62454   | 0            | 1         | 1         |
| Mast3_j7         | 0.757381    | 0.742126  | -0.0293556   | 0.915718  | 0.973698  |
| Arrdc2_j3        | 0.284652    | 0.417324  | 0            | 1         | 1         |
| Arrdc2_j4        | 1.08881     | 0.994516  | 0            | 1         | 1         |
| Kcnn1            | 2.22691     | 1.78609   | 0            | 1         | 1         |
| Gm15427_j6       | 1.51085     | 1.42254   | -0.0868993   | 0.827057  | 0.944289  |
| Gm15427_j8       | 0.572841    | 0.795947  | 0.474538     | 0.403765  | 0.726553  |
| Haus8_j3         | 1.51941     | 1.76321   | 0.214697     | 0.445575  | 0.753014  |
| Nr2f6_j1         | 0.107759    | 0.0929001 | 0            | 1         | 1         |
| Nr2f6_j2         | 2.38236     | 1.63235   | 0            | 1         | 1         |

|                  |            |            |              |           |           |
|------------------|------------|------------|--------------|-----------|-----------|
| Ushbp1_j5        | 0.0598983  | 0.031802   | -0.913396    | 0.461173  | 1         |
| Ushbp1_j3        | 0.0520037  | 0.18644    | 1.84203      | 0.0073026 | 0.0680402 |
| Tmem221_j1       | 0.209991   | 0.135706   | -0.629838    | 0.523453  | 0.799328  |
| Fcho1_j6         | 0.0127116  | 0.601556   | 0            | 1         | 1         |
| Cyp4f18_j2       | 0.117726   | 0.222337   | 0.91731      | 0.171442  | 0.508472  |
| Cyp4f18_j1       | 0.0313522  | 0.104894   | 1.74229      | 0.185061  | 1         |
| Cib3_j1          | 0.116819   | 0.273767   | 1.22868      | 0.327786  | 0.670398  |
| Eps15l1_j6       | 0.283514   | 0.46188    | 0            | 1         | 1         |
| Eps15l1_j9       | 0          | 0.07947    | 0            | 1         | 1         |
| Cherp_j4         | 1.49994    | 2.10956    | 0.49204      | 0.125697  | 0.441571  |
| Cherp_j5         | 1.84752    | 1.94488    | 0.0740901    | 0.681444  | 0.880308  |
| 9130011J15Rik_j4 | 25.8316    | 25.6032    | -0.0128121   | 0.893647  | 0.966325  |
| Tmem184c_j2      | 17.6639    | 18.0881    | 0            | 1         | 1         |
| 1700011L22Rik_j1 | 0.537815   | 0.844666   | 0.651271     | 0.0364758 | 0.211122  |
| Mmaa_j2          | 0.369807   | 0.431709   | 0            | 1         | 1         |
| Mmaa_j6          | 0.0218085  | 0.418911   | 0            | 1         | 1         |
| Mmaa_j8          | 0.295506   | 0.00098276 | 0            | 1         | 1         |
| Smad1_j1         | 0.163379   | 4.51217    | 0            | 1         | 1         |
| Smarca5_j4       | 0.106936   | 0.0705076  | -0.600902    | 0.632703  | 1         |
| Gab1_j4          | 1.82932    | 3.67777    | 0            | 1         | 1         |
| Gab1_j5          | 0.0440241  | 0.129663   | 0            | 1         | 1         |
| Zfp330_j6        | 0.248058   | 0.418143   | 0.753317     | 0.228781  | 0.57584   |
| Scoc             | 7.29177    | 7.88652    | 0            | 1         | 1         |
| Tecr             | 15.1573    | 7.05343    | 0            | 1         | 1         |
| Pkn1             | 1.26713    | 1.79887    | 0            | 1         | 1         |
| Cd97_j3          | 0          | 0.439128   | 1.79769e+308 | 1.45E-09  | 1.18E-07  |
| Cd97_j6          | 1.29141    | 1.39346    | 0.109728     | 0.666453  | 0.873739  |
| Dcaf15_j7        | 5.22614    | 6.27179    | 0.263132     | 0.0838364 | 0.353091  |
| Dcaf15_j8        | 2.0346     | 2.24932    | 0.144741     | 0.560081  | 0.821011  |
| Cc2d1a_j6        | 0.110965   | 0.114996   | 0            | 1         | 1         |
| Nacc1_j1         | 16.7995    | 18.3803    | 0            | 1         | 1         |
| Rad23a_j4        | 0.0911837  | 0.0859623  | -0.0850717   | 0.928341  | 1         |
| AK039159_j1      | 0.843943   | 0.656478   | -0.362399    | 0.178457  | 0.517953  |
| Zfp791_j5        | 0          | 0.0730884  | 1.79769e+308 | 0.0366509 | 1         |
| Neto2_j2         | 0.136196   | 0.125691   | 0            | 1         | 1         |
| Zfp423_j2        | 0.00166753 | 2.22739    | 0            | 1         | 1         |
| Zfp423_j3        | 0          | 0.443966   | 0            | 1         | 1         |
| Aktip_j5         | 10.8608    | 9.68296    | 0            | 1         | 1         |
| Aktip            | 5.41471    | 4.16446    | 0            | 1         | 1         |
| Ces5a_j3         | 0          | 0.194431   | 1.79769e+308 | 0.0231992 | 0.156057  |
| XLOC_032964      | 0.0388164  | 0.093664   | 1.27083      | 0.298122  | 1         |
| XLOC_032964      | 0          | 0.131875   | 1.79769e+308 | 0.0410673 | 1         |
| AK039837_j1      | 0.163175   | 0.138786   | -0.233559    | 0.831748  | 0.945814  |
| Ciapi1_j3        | 0.0631486  | 0.219205   | 0            | 1         | 1         |
| Dok4_j2          | 0          | 0.486271   | 0            | 1         | 1         |
| Dok4_j3          | 26.3915    | 20.3413    | 0            | 1         | 1         |
| Csnk2a2_j1       | 0          | 0.279529   | 1.79769e+308 | 0.0250466 | 0.164508  |



|                  |             |           |              |           |           |
|------------------|-------------|-----------|--------------|-----------|-----------|
| Cnot1_j13        | 4.04754     | 4.13152   | 0            | 1         | 1         |
| Got2_j6          | 0.262529    | 0.433073  | 0            | 1         | 1         |
| Cdh11_j2         | 0.023927    | 0.15415   | 0            | 1         | 1         |
| Cdh11_j3         | 9.66669     | 7.64591   | 0            | 1         | 1         |
| XLOC_032992      | 0.0516243   | 0.176367  | 1.77246      | 0.08036   | 0.344797  |
| Tk2              | 5.05473     | 4.99481   | 0            | 1         | 1         |
| Dync1li2_j3      | 44.3545     | 41.6293   | 0            | 1         | 1         |
| Dync1li2_j4      | 0.121806    | 0.5647    | 0            | 1         | 1         |
| Rrad_j2          | 0           | 0.0545298 | 1.79769e+308 | 0.108748  | 1         |
| Lrrc29_j1        | 0.0977123   | 0.11583   | 0.245401     | 0.787919  | 1         |
| Lrrc29           | 0.332526    | 0.515909  | 0.633648     | 0.0719462 | 0.322462  |
| Kctd19_j1        | 0           | 0.0796043 | 1.79769e+308 | 0.0088342 | 1         |
| Agrp             | 0.561963    | 0.617887  | 0.136868     | 0.746414  | 0.911671  |
| Acd_j3           | 2.03069     | 1.94704   | 0            | 1         | 1         |
| Gfod2_j2         | 0           | 0.877891  | 1.79769e+308 | 4.24E-05  | 0.001037  |
| Gfod2_j3         | 1.43086     | 1.44402   | 0.0132021    | 0.960797  | 0.988902  |
| Ranbp10_j4       | 0.0461288   | 0.0684782 | 0            | 1         | 1         |
| Cenpt_j3         | 0           | 0.369191  | 1.79769e+308 | 0.0009715 | 0.0139682 |
| Psemb10_j3       | 1.53192     | 1.94154   | 0.341857     | 0.143003  | 0.469978  |
| Slc12a4_j4       | 1.01108     | 1.19705   | 0.243578     | 0.326641  | 0.669796  |
| Slc7a6os         | 2.94841     | 4.09113   | 0.472561     | 0.0005519 | 0.0088637 |
| Terf2_j3         | 0.0479382   | 0.0597357 | 0            | 1         | 1         |
| Dhx38_j1         | 3.79779     | 3.96669   | 0            | 1         | 1         |
| Dhodh_j1         | 0           | 0.428665  | 0            | 1         | 1         |
| Atxn1l_j3        | 0.235819    | 1.46591   | 0            | 1         | 1         |
| Atxn1l_j4        | 0.000239638 | 0.405315  | 0            | 1         | 1         |
| AK076897_j1      | 0.0746107   | 0.218108  | 1.54759      | 0.204961  | 0.549271  |
| Ddx19b_j1        | 1.64179     | 1.37381   | 0            | 1         | 1         |
| Mrc1_j11         | 0           | 0.125819  | 1.79769e+308 | 0.0878    | 1         |
| Rfwd3_j3         | 0.292338    | 0.716154  | 1.29263      | 0.125021  | 0.440439  |
| Fa2h_j2          | 0           | 0.0709433 | 1.79769e+308 | 0.0763297 | 1         |
| Wdr59_j1         | 1.16587     | 1.71151   | 0            | 1         | 1         |
| Bcar1_j2         | 2.2852      | 5.71436   | 0            | 1         | 1         |
| Tmem231_j1       | 0.341594    | 0.614883  | 0            | 1         | 1         |
| Adat1_j4         | 6.04E-05    | 0.596971  | 13.2717      | 0.9148    | 0.97341   |
| XLOC_033064      | 0.0938772   | 0.163093  | 0.79685      | 0.272568  | 0.621353  |
| 2310061C15Rik_j5 | 0.747255    | 1.26546   | 0.759984     | 0.0009309 | 0.013508  |
| 1700030J22Rik    | 0.46963     | 0.314979  | -0.576267    | 0.0552073 | 0.274204  |
| Pkd1l2_j1        | 0.0318712   | 0.213774  | 2.74576      | 0.100124  | 0.391694  |
| Pkd1l2_j10       | 0.013424    | 0.0817602 | 2.60658      | 0.233433  | 1         |
| Pkd1l2_j18       | 0.359597    | 0.469112  | 0.38355      | 0.46093   | 0.762256  |
| Pkd1l2_j20       | 0.0756516   | 0.140472  | 0.892842     | 0.308427  | 1         |
| Sdr42e1_j1       | 0           | 0.135136  | 1.79769e+308 | 0.0116828 | 1         |
| Mphosph6_j2      | 0.11575     | 0.260328  | 1.16931      | 0.321902  | 0.664958  |
| Zdhhc7_j4        | 0.937709    | 0.771215  | 0            | 1         | 1         |
| Zdhhc7_j5        | 1.20231     | 1.38754   | 0            | 1         | 1         |
| Zdhhc7           | 1.59493     | 1.40458   | 0            | 1         | 1         |

|                  |           |                        |           |           |           |
|------------------|-----------|------------------------|-----------|-----------|-----------|
| AK087264_j1      | 0.0715476 | 0.0853637              | 0.25472   | 0.811263  | 1         |
| AK087264_j8      | 0         | 0.0981296 1.79769e+308 |           | 0.0168427 | 1         |
| Mthfsd_j6        | 7.4313    | 6.69687                | 0         | 1         | 1         |
| Mthfsd_j9        | 1.20455   | 1.20554                | 0         | 1         | 1         |
| Fbxo31_j7        | 9.06965   | 13.0324                | 0         | 1         | 1         |
| Zcchc14_j5       | 0.0886707 | 0.0932569              | 0         | 1         | 1         |
| Klhdc4_j5        | 0.529728  | 0.255565               | -1.05156  | 0.148885  | 0.477837  |
| Slc7a5_j1        | 12.7245   | 18.3163                | 0         | 1         | 1         |
| Fam38a_j7        | 0.0168259 | 0.0648907              | 1.94733   | 0.102589  | 1         |
| Galns_j3         | 0         | 0.375023 1.79769e+308  |           | 0.0001683 | 0.0033218 |
| AK032654_j1      | 0         | 0.19404 1.79769e+308   |           | 0.0035839 | 0.039682  |
| Sult5a1_j2       | 0         | 0.0716133 1.79769e+308 |           | 0.0975267 | 1         |
| Spata2L_j1       | 0.340469  | 0.424914               | 0         | 1         | 1         |
| XLOC_033123      | 0         | 0.0580158 1.79769e+308 |           | 0.10652   | 1         |
| Pgbd5_j4         | 4.43819   | 4.75562                | 0         | 1         | 1         |
| Pgbd5_j5         | 0         | 0.120375               | 0         | 1         | 1         |
| Ttc13_j4         | 1.53822   | 2.75201                | 0         | 1         | 1         |
| Ttc13            | 3.0695    | 3.43031                | 0         | 1         | 1         |
| Fam89a_j1        | 19.1838   | 21.2987                | 0         | 1         | 1         |
| Egln1_j1         | 1.14406   | 1.60784                | 0         | 1         | 1         |
| Sipa1l2_j5       | 3.90E-05  | 0.268515               | 12.7475   | 0.865346  | 0.957067  |
| Pcnx12_j4        | 0.1358    | 0.298334               | 0         | 1         | 1         |
| Tarbp1_j1        | 0.103072  | 0.0936248              | -0.138695 | 0.843764  | 1         |
| Tomm20_j4        | 0.779321  | 0.689077               | 0         | 1         | 1         |
| Arhgef18         | 5.08964   | 2.72147                | 0         | 1         | 1         |
| Arhgef18_j3      | 1.11847   | 3.56528                | 0         | 1         | 1         |
| Pnpla6_j10       | 1.26388   | 1.07991                | 0         | 1         | 1         |
| Pnpla6_j9        | 1.82496   | 1.90939                | 0         | 1         | 1         |
| 2310057J16Rik_j5 | 0.236458  | 0.203116               | 0         | 1         | 1         |
| 2310057J16Rik_j4 | 0.930705  | 1.35509                | 0         | 1         | 1         |
| XLOC_032141      | 0.073321  | 0.125478               | 0         | 1         | 1         |
| Evi5l_j6         | 1.19553   | 1.07751                | 0         | 1         | 1         |
| Evi5l_j4         | 4.86125   | 5.74051                | 0         | 1         | 1         |
| Evi5l_j5         | 9.00843   | 7.14642                | 0         | 1         | 1         |
| Ccl25_j7         | 0         | 0.0700537 1.79769e+308 |           | 0.13771   | 1         |
| Ccl25_j8         | 0.356679  | 0.0959024              | -1.89499  | 0.137248  | 0.460762  |
| Lass4_j1         | 13.8994   | 15.3531                | 0         | 1         | 1         |
| Col4a2_j1        | 3.4508    | 4.20999                | 0         | 1         | 1         |
| Tfdp1_j2         | 0.94588   | 1.13525                | 0.263286  | 0.584422  | 0.833455  |
| Upf3a_j1         | 2.57092   | 2.91624                | 0.181824  | 0.527127  | 0.801435  |
| Arhgef10_j4      | 0.178592  | 0.333134               | 0         | 1         | 1         |
| Arhgef10_j10     | 5.39801   | 6.4278                 | 0         | 1         | 1         |
| Kbtbd11_j5       | 0.0971081 | 0.555848               | 0         | 1         | 1         |
| Mcp1_j3          | 0.463178  | 0.605673               | 0.386971  | 0.203309  | 0.547229  |
| XLOC_032197      | 0.599404  | 0.824911               | 0.460709  | 0.503344  | 0.787002  |
| XLOC_032197      | 0.777345  | 0.842416               | 0.115978  | 0.66033   | 0.871049  |
| Slc20a2_j3       | 0         | 0.402096 1.79769e+308  |           | 1.82E-05  | 0.000514  |

|              |             |           |               |           |          |
|--------------|-------------|-----------|---------------|-----------|----------|
| Plat_j1      | 8.65E-05    | 0.702226  | 12.9868       | 0.887286  | 0.964241 |
| Fgfr1_j9     | 3.38488     | 2.93399   | 0             | 1         | 1        |
| Whsc11l_j6   | 0.469477    | 0.524579  | 0.160105      | 0.490934  | 0.780156 |
| Rnf170_j7    | 0.994861    | 1.2531    | 0.33294       | 0.233495  | 0.580776 |
| Rnf170_j9    | 0.665537    | 0.597203  | -0.156299     | 0.66989   | 0.875139 |
| Rnf170_j11   | 0.748049    | 0.665832  | -0.167975     | 0.639889  | 0.860804 |
| Thap1_j1     | 0           | 0.1855    | 1.79769e+308  | 0.0152201 | 0.116137 |
| Chrn3_j3     | 0.101094    | 0.112238  | 0             | 1         | 1        |
| Dusp26_j1    | 0.622768    | 0.356927  | 0             | 1         | 1        |
| XLOC_032248  | 0.0581951   | 0.0424688 | -0.454496     | 0.79351   | 1        |
| Ppp2cb_j1    | 57.2741     | 55.4194   | -0.0474897    | 0.620017  | 0.850928 |
| Gsr_j2       | 1.23639     | 4.44869   | 1.84725       | 8.85E-10  | 7.48E-08 |
| Mboat4_j4    | 0           | 0.0485223 | 0             | 1         | 1        |
| Tmem66_j4    | 28.4309     | 31.9465   | 0             | 1         | 1        |
| Mfhas1_j1    | 4.31107     | 5.16503   | 0             | 1         | 1        |
| Mfhas1_j2    | 14.2857     | 19.3492   | 0             | 1         | 1        |
| XLOC_032261  | 0           | 0.0702066 | 1.79769e+308  | 0.0428241 | 1        |
| Tusc3_j4     | 0           | 0.0867484 | 0             | 1         | 1        |
| Efha2_j1     | 31.3016     | 29.5902   | -0.0811139    | 0.385778  | 0.714232 |
| Slc7a2_j2    | 0           | 0.107718  | 0             | 1         | 1        |
| Pcm1_j1      | 3.43589     | 2.64821   | 0             | 1         | 1        |
| Pcm1_j3      | 1.98772     | 1.96063   | 0             | 1         | 1        |
| Fat1_j2      | 0.0346111   | 0.0777347 | 1.16732       | 0.0702476 | 1        |
| Fat1_j3      | 0.0825541   | 0         | -1.79769e+308 | 7.48E-07  | 1        |
| Ufsp2_j1     | 0.191549    | 0.181028  | -0.0815007    | 0.880845  | 0.962091 |
| Ufsp2_j3     | 1.60769     | 2.08484   | 0.374949      | 0.21256   | 0.557606 |
| Acsl1_j5     | 1.91174     | 0.567069  | 0             | 1         | 1        |
| Casp3_j1     | 0.000207661 | 1.23815   | 0             | 1         | 1        |
| AK032387_j10 | 0.294553    | 0.22999   | -0.356953     | 0.623215  | 0.852781 |
| Hpgd_j2      | 0           | 0.210658  | 1.79769e+308  | 0.0305134 | 0.187857 |
| AK141659_j3  | 0.077602    | 0.0622966 | -0.316941     | 0.862253  | 1        |
| AK141659_j4  | 0.101826    | 0.10528   | 0.048124      | 0.965919  | 1        |
| XLOC_032306  | 0.126054    | 0.243212  | 0             | 1         | 1        |
| XLOC_032307  | 0.12672     | 0.219082  | 0.789824      | 0.262955  | 0.611799 |
| Nek1_j7      | 0.000604046 | 0.563956  | 0             | 1         | 1        |
| Ddx60_j9     | 0.0956895   | 0.200593  | 1.06784       | 0.459541  | 0.761406 |
| March1       | 0.16528     | 0.2808    | 0.764634      | 0.0469879 | 0.24858  |
| Npy1r_j2     | 0.703288    | 1.50474   | 0             | 1         | 1        |
| Naf1_j1      | 0.0522109   | 0.36298   | 2.79747       | 0.0252487 | 0.165458 |
| Nat2_j1      | 0.695067    | 0.829252  | 0.254658      | 0.545209  | 0.812114 |
| Sh2d4a_j1    | 0           | 0.0628509 | 1.79769e+308  | 0.0719452 | 1        |
| Ints10_j1    | 0.108133    | 0.190807  | 0             | 1         | 1        |
| XLOC_032329  | 0.178137    | 0.673336  | 1.91834       | 0.0714581 | 0.321458 |
| Atp13a1_j4   | 0.295273    | 0.279572  | 0             | 1         | 1        |
| Lpar2        | 0.0589334   | 0.147447  | 1.32304       | 0.081614  | 1        |
| Lpar2_j1     | 0           | 0.110952  | 1.79769e+308  | 0.0129472 | 1        |
| Pbx4_j2      | 0.424732    | 0.3558    | -0.255487     | 0.638203  | 0.859943 |

|             |             |           |              |           |           |
|-------------|-------------|-----------|--------------|-----------|-----------|
| Sugp2_j1    | 1.94762     | 2.00649   | 0            | 1         | 1         |
| Fkbp8_j5    | 0.0220593   | 0.0614396 | 0            | 1         | 1         |
| Fkbp8_j6    | 0.535533    | 0.728101  | 0            | 1         | 1         |
| Ell_j2      | 1.58492     | 2.32182   | 0.550841     | 0.0190021 | 0.136135  |
| Isyna1      | 10.0628     | 8.82187   | -0.18987     | 0.127423  | 0.444832  |
| Pde4c_j2    | 0           | 0.186625  | 1.79769e+308 | 0.001475  | 0.0194733 |
| Pde4c_j1    | 0.0591934   | 0.205223  | 1.79368      | 0.0210701 | 0.14607   |
| Pde4c_j11   | 0.54744     | 0.313606  | -0.803747    | 0.0283697 | 0.179048  |
| Pde4c_j18   | 0.448188    | 0.125477  | -1.83668     | 0.0022938 | 0.0278109 |
| Rab3a_j2    | 73.4246     | 71.7731   | 0            | 1         | 1         |
| Myo9b_j4    | 0.241936    | 0.284232  | 0.232444     | 0.535759  | 0.80631   |
| Myo9b_j11   | 0.267401    | 0.365026  | 0.448994     | 0.288718  | 0.636345  |
| Gtpbp3_j3   | 1.00158     | 1.44429   | 0.528088     | 0.0369558 | 0.212772  |
| Slc27a1_j8  | 3.57145     | 3.30469   | -0.111995    | 0.570956  | 0.826513  |
| Slc27a1_j9  | 7.42205     | 7.29334   | -0.0252367   | 0.856625  | 0.95467   |
| Slc27a1_j15 | 1.72477     | 1.82899   | 0.0846445    | 0.660544  | 0.871208  |
| Fam129c_j1  | 1.38018     | 1.75909   | 0.349974     | 0.476224  | 0.77201   |
| Zfp709_j1   | 0           | 0.0799527 | 1.79769e+308 | 0.0019513 | 1         |
| Tmem38a_j1  | 6.3103      | 5.52385   | -0.192035    | 0.188324  | 0.529656  |
| Tmem38a_j3  | 28.0396     | 29.253    | 0.0611203    | 0.546406  | 0.81297   |
| Nwd1_j3     | 0.247994    | 0.150547  | -0.720089    | 0.0448743 | 0.242104  |
| Nwd1_j2     | 0.407692    | 0.23188   | -0.814101    | 0.0061367 | 0.0596123 |
| Nwd1_j9     | 1.15121     | 0.924096  | -0.317042    | 0.0959764 | 0.382589  |
| Sin3b_j1    | 1.31915     | 1.40639   | 0.0923857    | 0.638712  | 0.860184  |
| XLOC_032388 | 0.0491466   | 0.0587066 | 0            | 1         | 1         |
| Hmgxb4_j2   | 0.211189    | 0.253652  | 0            | 1         | 1         |
| Hmgxb4_j6   | 4.75E-05    | 1.0608    | 0            | 1         | 1         |
| Tom1_j7     | 0.0509852   | 0.0782199 | 0.617456     | 0.464881  | 1         |
| Tom1_j12    | 0.0605329   | 0.259137  | 2.09792      | 0.0484651 | 0.253397  |
| Hmox1_j1    | 1.46792     | 3.07695   | 1.06773      | 0.000348  | 0.0060277 |
| Mcm5_j1     | 0.365228    | 0.560538  | 0.618015     | 0.105059  | 0.402375  |
| Rasd2_j1    | 0.546935    | 0.54487   | -0.00545869  | 0.987504  | 0.996374  |
| XLOC_032400 | 0.168393    | 0.0885178 | -0.927791    | 0.489909  | 0.779646  |
| Inpp4b_j7   | 0.029925    | 0.266428  | 3.15432      | 0.129032  | 0.447615  |
| Inpp4b_j12  | 0.0571996   | 0.164576  | 1.52467      | 0.140113  | 0.465626  |
| Rnf150_j2   | 0.000466099 | 0.39378   | 9.72254      | 0.0643994 | 0.301423  |
| Tbc1d9_j1   | 0           | 0.0810962 | 1.79769e+308 | 0.0566334 | 1         |
| Ucp1        | 0.104231    | 0.123853  | 0.248853     | 0.763303  | 1         |
| Clgn_j3     | 8.87858     | 8.49966   | 0            | 1         | 1         |
| Dnajb1_j2   | 0.063756    | 0.238495  | 1.90332      | 0.05947   | 0.2868    |
| Palm3_j6    | 11.0651     | 10.5543   | 0            | 1         | 1         |
| Podnl1_j6   | 0.0148053   | 0.0518858 | 1.80923      | 0.352728  | 1         |
| Podnl1_j5   | 0           | 0.199102  | 1.79769e+308 | 0.0013834 | 0.0185608 |
| Cacna1a_j7  | 5.28839     | 5.52141   | 0            | 1         | 1         |
| Farsa_j1    | 0           | 0.183175  | 1.79769e+308 | 0.0254193 | 0.166262  |
| Hook2       | 0           | 0.0576431 | 1.79769e+308 | 0.0923971 | 1         |
| Tnpo2_j1    | 1.4817      | 1.28802   | -0.202104    | 0.352749  | 0.689566  |

|             |             |           |              |           |           |
|-------------|-------------|-----------|--------------|-----------|-----------|
| Tnpo2_j6    | 0.147837    | 0.900147  | 2.60616      | 2.11E-10  | 1.99E-08  |
| Man2b1_j4   | 1.50322     | 2.64724   | 0.816433     | 0.0003701 | 0.0063553 |
| XLOC_032445 | 0.288663    | 0.307061  | 0.089139     | 0.779362  | 0.925607  |
| Gpt2_j2     | 0.0343238   | 0.0813898 | 0            | 1         | 1         |
| Lonp2_j2    | 0.669426    | 1.71983   | 1.36127      | 2.65E-05  | 0.0006975 |
| Adcy7_j4    | 0.0890017   | 0.101572  | 0.190595     | 0.729615  | 1         |
| Nkd1_j1     | 0.842481    | 0.904086  | 0.101817     | 0.678891  | 0.879317  |
| Nod2_j4     | 0.0404227   | 0.0991247 | 1.29408      | 0.130132  | 1         |
| XLOC_032460 | 0.0490509   | 0.0193128 | -1.34473     | 0.623606  | 1         |
| XLOC_032460 | 0.135827    | 0.12229   | -0.151463    | 0.832118  | 1         |
| Chd9_j2     | 0           | 0.0975287 | 1.79769e+308 | 0.189685  | 1         |
| Chd9_j8     | 0.0945098   | 0.158713  | 0.747886     | 0.0844975 | 0.354833  |
| Chd9_j13    | 9.42E-05    | 0.502875  | 12.382       | 0.53315   | 0.804879  |
| Gnao1       | 55.9652     | 47.0823   | 0            | 1         | 1         |
| Gnao1_j5    | 7.30432     | 6.23628   | 0            | 1         | 1         |
| Mt2_j1      | 24.5618     | 33.1228   | 0.431409     | 0.0044468 | 0.0465096 |
| Herpud1_j3  | 1.22179     | 1.58563   | 0.376067     | 0.342282  | 0.68209   |
| Ccl22_j1    | 1.72E-05    | 0.111953  | 12.6723      | 0.986143  | 1         |
| Polr2c_j5   | 0           | 0.0522376 | 1.79769e+308 | 0.0966301 | 1         |
| Polr2c_j6   | 1.65188     | 1.34436   | 0            | 1         | 1         |
| Gpr56_j2    | 44.7337     | 37.4692   | 0            | 1         | 1         |
| Gpr56_j7    | 13.7728     | 15.614    | 0            | 1         | 1         |
| Gpr97_j1    | 0           | 0.113501  | 1.79769e+308 | 0.0124278 | 1         |
| Gpr97_j2    | 0           | 0.0518291 | 1.79769e+308 | 0.0786494 | 1         |
| Katnb1_j4   | 0.412641    | 0.501567  | 0.281555     | 0.530405  | 0.803061  |
| Katnb1_j5   | 0.289442    | 0.441166  | 0.608048     | 0.0299015 | 0.185331  |
| AA960436_j1 | 2.67348     | 3.17683   | 0            | 1         | 1         |
| Mmp15_j2    | 15.6351     | 14.8801   | 0            | 1         | 1         |
| XLOC_032499 | 0.904961    | 0.851064  | 0            | 1         | 1         |
| CKLF6_j4    | 0.150128    | 0.341935  | 1.18753      | 0.0068295 | 0.0645822 |
| Cmtm3_j6    | 0.846479    | 2.26142   | 1.41768      | 2.46E-05  | 0.000654  |
| Ces2g_j3    | 0.191289    | 0.137052  | -0.481032    | 0.467624  | 0.766717  |
| Cbfb_j6     | 16.0571     | 16.185    | 0            | 1         | 1         |
| Cbfb        | 8.16471     | 5.647     | 0            | 1         | 1         |
| Hsf4_j3     | 1.54234     | 1.13646   | 0            | 1         | 1         |
| Elmo3_j5    | 0.0167669   | 0.079977  | 2.25397      | 0.0314355 | 1         |
| Elmo3_j7    | 0.178403    | 0.2676    | 0.584939     | 0.156386  | 0.4898    |
| Slc9a5_j10  | 0.000372697 | 0.105408  | 8.14377      | 0.645533  | 1         |
| Plekhg4_j2  | 0.0779519   | 0.121909  | 0.645152     | 0.413036  | 1         |
| Plekhg4_j6  | 0.0439805   | 0.0631461 | 0.521831     | 0.652767  | 1         |
| Plekhg4_j10 | 0           | 0.114031  | 1.79769e+308 | 0.0307227 | 1         |
| Plekhg4_j15 | 0           | 0.0466996 | 1.79769e+308 | 0.209181  | 1         |
| Fam65a_j3   | 1.09016     | 1.52037   | 0            | 1         | 1         |
| Rltpr_j8    | 1.87912     | 1.44537   | 0            | 1         | 1         |
| Nutf2_j9    | 20.2715     | 21.7933   | 0.104436     | 0.330774  | 0.67252   |
| Edc4_j8     | 4.88045     | 4.9234    | 0.0126402    | 0.917075  | 0.97399   |
| Edc4_j10    | 0.538084    | 0.422908  | -0.347487    | 0.349144  | 0.687028  |

|              |             |           |              |           |           |
|--------------|-------------|-----------|--------------|-----------|-----------|
| Pskh1_j1     | 0.000168997 | 0.806382  | 12.2203      | 0.831244  | 0.945533  |
| Nfatc3_j2    | 0.853829    | 0.575308  | 0            | 1         | 1         |
| Prmt7_j1     | 0.876233    | 3.16203   | 1.85147      | 0         | 0         |
| AK015813_j2  | 0.0519864   | 0.289624  | 2.47798      | 0.236187  | 0.583411  |
| Nfat5_j6     | 0.093818    | 0.158245  | 0.754224     | 0.0573673 | 0.280663  |
| Nfat5_j5     | 6.59469     | 6.00388   | -0.135408    | 0.185293  | 0.525537  |
| Wwp2_j1      | 9.42063     | 8.34529   | -0.174862    | 0.160241  | 0.494798  |
| Wwp2_j2      | 0.102457    | 0.834833  | 3.02647      | 1.37E-05  | 0.0004045 |
| Zfhx3_j2     | 0.509089    | 0.407717  | 0            | 1         | 1         |
| Zfhx3_j3     | 0           | 0.0968175 | 0            | 1         | 1         |
| Pmfbp1_j9    | 0           | 0.0975595 | 1.79769e+308 | 0.0703992 | 1         |
| Txnl4b_j1    | 10.6706     | 10.61     | 0            | 1         | 1         |
| Pkd1l3_j3    | 0           | 0.0691913 | 1.79769e+308 | 0.0441156 | 1         |
| Phlpp2_j5    | 3.66756     | 3.52104   | 0            | 1         | 1         |
| XLOC_032558  | 0.0917733   | 0.205543  | 1.16329      | 0.0322914 | 0.195009  |
| Aars_j1      | 4.85726     | 9.8996    | 0            | 1         | 1         |
| XLOC_032570  | 0.159972    | 0.402732  | 1.332        | 0.215609  | 0.561479  |
| XLOC_032571  | 0.161928    | 0.196116  | 0.276357     | 0.80083   | 0.93371   |
| Gabarapl2_j3 | 29.5266     | 27.7258   | -0.090789    | 0.328944  | 0.671264  |
| Mon1b_j1     | 2.13738     | 2.43749   | 0            | 1         | 1         |
| Vat1l_j1     | 1.89414     | 2.28853   | 0            | 1         | 1         |
| Wwox_j2      | 0           | 0.0697023 | 1.79769e+308 | 0.114062  | 1         |
| XLOC_032582  | 0.0300263   | 0.121083  | 2.0117       | 0.344833  | 1         |
| Plcg2_j3     | 0.119618    | 0.029144  | -2.03716     | 0.428535  | 1         |
| Cdh13_j2     | 0           | 0.23459   | 1.79769e+308 | 0.0006168 | 0.0097111 |
| Klhl36_j1    | 0.063096    | 0.208975  | 1.72771      | 0.001612  | 0.0209639 |
| Gse1         | 0.665472    | 0.861883  | 0.373114     | 0.101583  | 0.394864  |
| Cox4i1_j1    | 256.042     | 185.272   | 0            | 1         | 1         |
| Irf8_j1      | 0           | 0.0532549 | 1.79769e+308 | 0.0749359 | 1         |
| Irf8         | 1.01E-05    | 1.10653   | 16.7408      | 0.980865  | 0.994152  |
| XLOC_032607  | 0.128416    | 0.108177  | -0.247429    | 0.835366  | 1         |
| Map1lc3b_j3  | 111.797     | 113.507   | 0            | 1         | 1         |
| Jph3_j1      | 8.04396     | 5.53485   | 0            | 1         | 1         |
| Banp_j4      | 0           | 0.156727  | 1.79769e+308 | 0.0258963 | 1         |
| Banp_j9      | 0.837499    | 0.86486   | 0.0463788    | 0.911422  | 0.972265  |
| Zfpm1_j6     | 0.45326     | 0.199396  | -1.1847      | 0.134071  | 0.455747  |
| Cdt1_j2      | 0           | 0.0681149 | 1.79769e+308 | 0.0657296 | 1         |
| XLOC_032621  | 0.144741    | 0.166205  | 0.199494     | 0.695761  | 0.887819  |
| XLOC_032621  | 0.239853    | 0.219452  | -0.128246    | 0.757744  | 0.916527  |
| Rpl13_j4     | 3.13063     | 5.00779   | 0            | 1         | 1         |
| Cdk10_j1     | 2.82903     | 2.89507   | 0            | 1         | 1         |
| XLOC_032635  | 0.188859    | 0.200731  | 0.0879525    | 0.863803  | 0.956651  |
| XLOC_032636  | 0.0876172   | 0.158996  | 0            | 1         | 1         |
| Rab4a_j2     | 6.74988     | 6.36584   | 0            | 1         | 1         |
| Galnt2_j1    | 0           | 1.14082   | 0            | 1         | 1         |
| Arv1_j2      | 0.212791    | 0.173971  | 0            | 1         | 1         |
| Gnpat_j3     | 8.99638     | 8.48415   | -0.0845744   | 0.546088  | 0.812874  |

|                  |           |           |              |           |           |
|------------------|-----------|-----------|--------------|-----------|-----------|
| Gm505_j2         | 0.340963  | 1.15347   | 1.75829      | 2.03E-08  | 1.34E-06  |
| XLOC_032650      | 0.0960081 | 0.195835  | 0            | 1         | 1         |
| Disc1_j1         | 0.0884481 | 0.114529  | 0.372814     | 0.694739  | 1         |
| Disc1_j3         | 0         | 0.0951571 | 1.79769e+308 | 0.0317001 | 1         |
| Slc35f3_j3       | 0.398849  | 0.335331  | -0.250257    | 0.63012   | 0.856283  |
| Slc35f3_j4       | 6.76E-05  | 0.143691  | 11.0531      | 0.926133  | 1         |
| Slc35f3_j8       | 0         | 0.184995  | 1.79769e+308 | 0.0088847 | 0.0784132 |
| Pard3_j5         | 0.443328  | 0.298808  | -0.569155    | 0.112383  | 0.417243  |
| Pard3_j7         | 0.33034   | 0.70047   | 1.08437      | 0.0002125 | 0.0040346 |
| Pard3_j8         | 1.2258    | 0.720037  | -0.767585    | 0.0224501 | 0.152768  |
| XLOC_032660      | 0         | 0.0567078 | 1.79769e+308 | 0.0538962 | 1         |
| Itgb1_j2         | 0         | 0.482495  | 1.79769e+308 | 1.04E-05  | 0.0003185 |
| Insr_j2          | 0.2325    | 0.297893  | 0.357566     | 0.38853   | 0.716008  |
| Pex11c_j2        | 0.205409  | 0.584098  | 1.50771      | 0.0010238 | 0.0145661 |
| Xab2_j2          | 1.47175   | 2.64831   | 0.847538     | 0.0012899 | 0.0175184 |
| Timm44_j1        | 7.73649   | 13.2672   | 0            | 1         | 1         |
| Timm44_j2        | 14.847    | 15.1546   | 0            | 1         | 1         |
| Fam155a_j4       | 0.178789  | 2.2289    | 0            | 1         | 1         |
| Fam155a_j3       | 3.36153   | 0.0300595 | 0            | 1         | 1         |
| Pcid2_j2         | 0.368144  | 0.995084  | 0            | 1         | 1         |
| Csmd1_j6         | 0.0605467 | 0.0704116 | 0.217766     | 0.671954  | 1         |
| Csmd1_j13        | 0.890916  | 0.993327  | 0.15698      | 0.866626  | 0.957738  |
| Csmd1_j18        | 0.65321   | 0.0959865 | -2.76664     | 0.0624464 | 0.295747  |
| 6820431F20Rik_j1 | 4.35584   | 5.99988   | 0.461983     | 0.0002885 | 0.0051761 |
| Atp7b_j2         | 0         | 0.117863  | 1.79769e+308 | 0.0367297 | 1         |
| Vdac3_j6         | 0.279454  | 0.273464  | 0            | 1         | 1         |
| Vdac3_j5         | 4.03556   | 7.54771   | 0            | 1         | 1         |
| Polb_j1          | 0         | 0.120189  | 1.79769e+308 | 0.0868567 | 1         |
| Polb_j4          | 0.274942  | 0.315757  | 0.199686     | 0.801167  | 0.933726  |
| Polb_j3          | 0         | 0.174927  | 1.79769e+308 | 0.057413  | 0.28075   |
| Ikbkb_j4         | 2.1495    | 3.39546   | 0            | 1         | 1         |
| Agpat6_j1        | 0.125541  | 0.0593615 | -1.08056     | 0.369829  | 1         |
| Golga7_j6        | 0.190489  | 0.175745  | 0            | 1         | 1         |
| Adam9_j1         | 13.9044   | 13.9719   | 0            | 1         | 1         |
| Adam9_j2         | 4.74286   | 3.99262   | 0            | 1         | 1         |
| Adam9            | 4.58105   | 5.94636   | 0            | 1         | 1         |
| Plekha2_j1       | 0         | 0.122355  | 0            | 1         | 1         |
| XLOC_032738      | 0.0776865 | 0.0824141 | 0.0852273    | 0.952987  | 1         |
| Letm2_j1         | 0.10468   | 0.514723  | 0            | 1         | 1         |
| Letm2_j5         | 0.516704  | 1.01665   | 0            | 1         | 1         |
| XLOC_032755      | 0         | 0.128375  | 1.79769e+308 | 0.0565765 | 1         |
| XLOC_032756      | 0.147754  | 0.290442  | 0.975055     | 0.159971  | 0.494558  |
| Nrg1_j1          | 12.6128   | 8.4283    | 0            | 1         | 1         |
| Nrg1_j4          | 1.08253   | 0.235576  | 0            | 1         | 1         |
| Nrg1_j5          | 1.03664   | 0.664514  | 0            | 1         | 1         |
| Ubxn8_j1         | 1.11643   | 1.04102   | -0.10089     | 0.570242  | 0.826188  |
| Rbpms_j1         | 0.209132  | 0.425988  | 1.0264       | 0.0079196 | 0.0720932 |

|               |           |            |              |           |           |
|---------------|-----------|------------|--------------|-----------|-----------|
| Dctn6_j2      | 26.6709   | 29.1887    | 0            | 1         | 1         |
| Tnks_j4       | 0         | 0.196214   | 0            | 1         | 1         |
| Eri1_j4       | 0         | 0.0582643  | 1.79769e+308 | 0.0311584 | 1         |
| Dlc1_j3       | 0.368236  | 0.181717   | -1.01894     | 0.0685706 | 0.313715  |
| Dlc1_j4       | 0         | 0.165606   | 1.79769e+308 | 0.0082995 | 0.0746588 |
| Cnot7         | 27.4526   | 28.2042    | 0.0389643    | 0.6799    | 0.879585  |
| Mtus1_j5      | 1.08633   | 1.72582    | 0            | 1         | 1         |
| Asah1_j4      | 0.628693  | 0.522244   | 0            | 1         | 1         |
| Asah1_j7      | 8.06013   | 6.51056    | 0            | 1         | 1         |
| Ccdc111_j4    | 0.157107  | 0.240039   | 0.611519     | 0.273284  | 0.62238   |
| Wwc2_j3       | 0.487515  | 0.717001   | 0            | 1         | 1         |
| Odz3_j8       | 3.40818   | 3.31481    | -0.0400763   | 0.765499  | 0.919802  |
| Odz3_j9       | 0         | 0.428524   | 1.79769e+308 | 2.20E-12  | 2.97E-10  |
| Odz3_j10      | 0         | 0.241522   | 1.79769e+308 | 3.48E-08  | 2.15E-06  |
| Spcs3_j3      | 3.18385   | 4.33187    | 0            | 1         | 1         |
| Wdr17_j6      | 0.107379  | 0.0623504  | -0.784242    | 0.431373  | 1         |
| Wdr17_j5      | 0.0656475 | 0.17538    | 1.41768      | 0.0392672 | 0.221259  |
| BC088983_j6   | 0.511946  | 0.859383   | 0.747309     | 0.0634951 | 0.298841  |
| BC088983_j7   | 0.437479  | 0.411194   | -0.0893914   | 0.877865  | 0.96086   |
| Galnt7_j2     | 0         | 0.0929189  | 1.79769e+308 | 0.0092088 | 1         |
| Psd3          | 0.700182  | 0.634787   | 0            | 1         | 1         |
| Csgalnact1_j5 | 0.928802  | 0.991309   | 0            | 1         | 1         |
| AK034302_j3   | 0.162829  | 0.00946814 | 0            | 1         | 1         |
| Gm7697_j1     | 0.213595  | 0.210003   | -0.0244631   | 0.97404   | 0.992534  |
| Ndufa13_j3    | 106.453   | 109.171    | 0.0363766    | 0.740519  | 0.909073  |
| Gatad2a_j6    | 0         | 0.114158   | 0            | 1         | 1         |
| Gatad2a_j7    | 0.785536  | 0.333714   | 0            | 1         | 1         |
| Crtc1_j7      | 0.499005  | 0.554313   | 0            | 1         | 1         |
| Klhl26_j2     | 4.32681   | 4.84183    | 0            | 1         | 1         |
| Klhl26_j1     | 1.33162   | 2.22517    | 0            | 1         | 1         |
| XLOC_032849   | 0.126669  | 0.0667994  | -0.923152    | 0.377173  | 1         |
| Ssbp4_j5      | 4.42242   | 4.8029     | 0            | 1         | 1         |
| Pik3r2_j2     | 2.18382   | 4.25753    | 0.96316      | 2.67E-08  | 1.70E-06  |
| Pik3r2_j8     | 6.22665   | 4.36914    | -0.511105    | 0.0022129 | 0.0270185 |
| Gm15427_j5    | 5.67214   | 5.50632    | -0.0428051   | 0.859544  | 0.95553   |
| Ushbp1_j9     | 0.21794   | 0.215157   | -0.0185403   | 0.97903   | 0.99392   |
| Ano8_j6       | 2.25994   | 2.58396    | 0            | 1         | 1         |
| Fcho1_j3      | 0.134642  | 0.156334   | 0            | 1         | 1         |
| Fcho1_j4      | 0.29789   | 0.418103   | 0            | 1         | 1         |
| Eps15l1_j1    | 0.294774  | 0.0854692  | 0            | 1         | 1         |
| Large         | 8.32332   | 7.61666    | 0            | 1         | 1         |
| Arhgap10_j3   | 0.287393  | 0.217421   | -0.402532    | 0.476254  | 0.77201   |
| Ednra_j1      | 1.12541   | 0.818153   | -0.460007    | 0.163019  | 0.498208  |
| Ednra_j2      | 0.187313  | 0.176363   | -0.086908    | 0.883495  | 0.963029  |
| Lsm6_j2       | 2.32869   | 2.47415    | 0.0874114    | 0.742684  | 0.909947  |
| Lsm6_j1       | 0.197586  | 0.206163   | 0.0613114    | 0.945494  | 0.983783  |
| Mmaa_j13      | 0.0795728 | 0.146863   | 0            | 1         | 1         |



|                  |             |           |              |           |           |
|------------------|-------------|-----------|--------------|-----------|-----------|
| Smarca5_j1       | 9.48146     | 8.70472   | -0.123312    | 0.394641  | 0.719811  |
| Gab1_j3          | 0.00040633  | 0.402638  | 0            | 1         | 1         |
| Il15             | 0.0249487   | 0.0897889 | 1.84757      | 0.363268  | 1         |
| Zfp330_j3        | 1.22452     | 1.12886   | -0.117345    | 0.78069   | 0.925867  |
| Zfp330           | 0.298216    | 0.655475  | 1.13618      | 0.0374796 | 0.214637  |
| Scoc_j1          | 5.50986     | 11.7727   | 0            | 1         | 1         |
| Tecr_j2          | 62.633      | 69.0256   | 0            | 1         | 1         |
| Tecr_j3          | 163.103     | 146.662   | 0            | 1         | 1         |
| Pkn1_j2          | 1.46884     | 2.36246   | 0            | 1         | 1         |
| Pkn1_j3          | 0.333992    | 0.531966  | 0            | 1         | 1         |
| Cd97_j2          | 0.166916    | 0.160522  | -0.0563498   | 0.888638  | 0.964658  |
| Nacc1_j3         | 7.5162      | 7.17676   | 0            | 1         | 1         |
| Nfix             | 0.0839336   | 0.256104  | 1.60941      | 0.0015104 | 0.0198432 |
| Rad23a_j2        | 3.26682     | 3.32624   | 0.0260034    | 0.849734  | 0.952228  |
| Mast1_j3         | 0.972496    | 0.675737  | 0            | 1         | 1         |
| Rnaseh2a_j2      | 0           | 0.243384  | 0            | 1         | 1         |
| Siah1a_j2        | 10.8204     | 10.2927   | -0.0721449   | 0.594214  | 0.83843   |
| Zfp423_j1        | 4.20789     | 3.3831    | 0            | 1         | 1         |
| Rpgrip1_j3       | 0.109232    | 0.175282  | 0.682278     | 0.209988  | 0.554517  |
| XLOC_032964      | 0.0806877   | 0.119287  | 0.564011     | 0.650131  | 1         |
| XLOC_032964      | 0.125075    | 0.26576   | 1.08733      | 0.2519    | 0.599884  |
| Nudt21_j3        | 9.07126     | 8.92381   | 0            | 1         | 1         |
| Bbs2_j2          | 2.52028     | 3.28143   | 0            | 1         | 1         |
| Ciapin1_j1       | 8.06348     | 9.65888   | 0            | 1         | 1         |
| Kifc3_j2         | 0.000222864 | 0.296609  | 10.3782      | 0.569378  | 0.825874  |
| Gtl3_j1          | 10.6381     | 9.95829   | 0            | 1         | 1         |
| Csnk2a2_j3       | 8.49389     | 10.384    | 0.289866     | 0.100046  | 0.391665  |
| Cnot1_j6         | 0.161772    | 0.163264  | 0            | 1         | 1         |
| Got2_j4          | 42.7843     | 51.8645   | 0            | 1         | 1         |
| Ccdc79_j2        | 0.122174    | 0.147105  | 0.267904     | 0.687926  | 1         |
| Tradd_j6         | 0.920011    | 0.367178  | 0            | 1         | 1         |
| 4931428F04Rik_j1 | 0.0697621   | 0.0558817 | 0            | 1         | 1         |
| Lrrc29_j2        | 0.135058    | 0.197701  | 0.549745     | 0.394424  | 0.719811  |
| Lrrc29_j11       | 0.0540178   | 0.280689  | 2.37747      | 0.0558449 | 0.276193  |
| Fhod1_j1         | 1.04249     | 1.18681   | 0.18705      | 0.292494  | 0.639479  |
| Kctd19_j5        | 0           | 0.173918  | 1.79769e+308 | 0.0179178 | 0.13055   |
| Atp6v0d1_j1      | 19.7837     | 20.8959   | 0            | 1         | 1         |
| Acd_j2           | 2.88961     | 2.93896   | 0            | 1         | 1         |
| E130303B06Rik_j2 | 0.30137     | 0.242993  | 0            | 1         | 1         |
| E130303B06Rik    | 0.0526711   | 0.122482  | 0            | 1         | 1         |
| Ranbp10_j5       | 2.06526     | 4.31914   | 0            | 1         | 1         |
| Ranbp10_j6       | 0           | 0.360702  | 0            | 1         | 1         |
| Cenpt_j2         | 0.479614    | 0.585971  | 0.288955     | 0.520999  | 0.798005  |
| Ctrl_j1          | 0.0331367   | 0.100058  | 1.59433      | 0.189036  | 1         |
| Psmb10_j9        | 7.07931     | 9.9847    | 0.496112     | 0.102038  | 0.395836  |
| Chtf8            | 0           | 0.316639  | 0            | 1         | 1         |
| AK042944_j4      | 0.280704    | 0.622317  | 1.1486       | 0.0125066 | 0.101218  |

|                  |            |           |              |           |           |
|------------------|------------|-----------|--------------|-----------|-----------|
| AK042944_j5      | 0.0232345  | 0.0492625 | 1.08422      | 0.50631   | 1         |
| 2400003C14Rik_j5 | 0.961871   | 1.06369   | 0            | 1         | 1         |
| Atxn1l_j5        | 1.32773    | 1.04338   | 0            | 1         | 1         |
| Chst4_j1         | 0.0176365  | 0.221868  | 3.65306      | 0.0244672 | 0.161866  |
| Mrc1_j1          | 0          | 0.334387  | 1.79769e+308 | 0.0008054 | 0.0120371 |
| Mrc1_j3          | 0          | 0.0551915 | 1.79769e+308 | 0.0791425 | 1         |
| Bcar1_j3         | 3.94503    | 7.46929   | 0            | 1         | 1         |
| Kars_j2          | 30.8637    | 35.8729   | 0.216983     | 0.0219724 | 0.150378  |
| Pkd1l2_j7        | 0.088056   | 0.0740431 | -0.250056    | 0.787022  | 1         |
| Pkd1l2_j21       | 0.0349333  | 0.138173  | 1.98381      | 0.377016  | 1         |
| Mphosph6_j3      | 0.242971   | 0.378243  | 0.638528     | 0.419933  | 0.73648   |
| Slc38a8_j2       | 0.0709003  | 0.0745643 | 0.0726952    | 0.961656  | 1         |
| Mbtps1_j4        | 6.5253     | 6.7835    | 0            | 1         | 1         |
| Hsd1l_j5         | 0.714299   | 1.36544   | 0            | 1         | 1         |
| Zdhhc7_j7        | 8.79075    | 10.4262   | 0            | 1         | 1         |
| AK039624_j4      | 0.233951   | 0.141835  | 0            | 1         | 1         |
| AK087264_j3      | 0.00487816 | 0.0819201 | 4.06981      | 0.196175  | 1         |
| Mthfsd_j2        | 0.0895951  | 0.022994  | 0            | 1         | 1         |
| Mthfsd_j4        | 3.64035    | 3.46274   | 0            | 1         | 1         |
| Fbxo31_j4        | 7.65658    | 5.50865   | 0            | 1         | 1         |
| Fbxo31_j5        | 0.111442   | 2.62504   | 0            | 1         | 1         |
| Fbxo31_j6        | 1.86014    | 1.89147   | 0            | 1         | 1         |
| Klhdc4_j2        | 1.81211    | 1.56406   | -0.212373    | 0.661054  | 0.871471  |
| Klhdc4_j3        | 0.205761   | 0.181398  | -0.181816    | 0.817687  | 0.940908  |
| Fam38a_j2        | 0.210544   | 0.246469  | 0.227286     | 0.502256  | 0.786303  |
| Fam38a_j1        | 0.0397353  | 0.121538  | 1.61291      | 0.0125967 | 1         |
| Aprt_j1          | 12.2795    | 14.3164   | 0.221426     | 0.195456  | 0.537888  |
| Cbfa2t3          | 0.149605   | 0.29252   | 0.967376     | 0.0490675 | 0.255341  |
| XLOC_033112      | 0.134138   | 0.227766  | 0.76383      | 0.272169  | 0.620962  |
| Sult5a1_j1       | 0          | 0.114002  | 1.79769e+308 | 0.0805235 | 1         |
| Sult5a1          | 0.0914177  | 0.267123  | 1.54696      | 0.0974797 | 0.385892  |
| Fanca_j1         | 0.0544724  | 0.0442383 | -0.300229    | 0.678876  | 1         |
| XLOC_033123      | 0.0987919  | 0.130419  | 0.400686     | 0.752698  | 1         |
| 1700054N08Rik_j1 | 0.130556   | 0.15864   | 0            | 1         | 1         |
| 1700054N08Rik_j2 | 0.451389   | 0.444377  | 0            | 1         | 1         |
| Abcb10_j1        | 1.18284    | 1.4176    | 0            | 1         | 1         |
| Pgbd5_j2         | 2.36739    | 0.805799  | 0            | 1         | 1         |
| Pgbd5_j3         | 0.160697   | 0.136779  | 0            | 1         | 1         |
| Ttc13_j5         | 0          | 0.0479929 | 0            | 1         | 1         |
| Egln1_j2         | 3.46082    | 3.87517   | 0            | 1         | 1         |
| Sipa1l2_j3       | 0.299702   | 1.25028   | 2.06065      | 1.55E-15  | 3.32E-13  |
| Pcnx12_j3        | 1.93217    | 1.29615   | 0            | 1         | 1         |
| Tarbp1_j4        | 0          | 0.129679  | 1.79769e+308 | 0.0007917 | 1         |
| Irf2bp2_j1       | 2.75798    | 2.67636   | 0            | 1         | 1         |
| Arhgef18_j2      | 0.10771    | 0.316911  | 0            | 1         | 1         |
| Pnpla6_j1        | 1.57643    | 1.35796   | 0            | 1         | 1         |
| Pnpla6_j6        | 3.67401    | 3.62422   | 0            | 1         | 1         |

|                  |             |           |              |           |           |
|------------------|-------------|-----------|--------------|-----------|-----------|
| 2310057J16Rik    | 0.549075    | 0.503855  | 0            | 1         | 1         |
| Stxbp2_j1        | 2.0422      | 2.63842   | 0            | 1         | 1         |
| 2900053A13Rik_j3 | 0.613711    | 0.751358  | 0            | 1         | 1         |
| Map2k7_j5        | 0.0533139   | 0.0814947 | 0.612195     | 0.357654  | 1         |
| Ccl25_j2         | 0.307767    | 0.269517  | -0.191463    | 0.825666  | 0.943781  |
| Tnfsf13b_j1      | 0.0378936   | 0.0917676 | 1.27603      | 0.460766  | 1         |
| Myo16_j2         | 0.168641    | 0.213972  | 0.343461     | 0.691307  | 0.885699  |
| AK162519_j1      | 1.65853     | 2.13077   | 0            | 1         | 1         |
| Carkd_j1         | 2.2051      | 2.61635   | 0            | 1         | 1         |
| Atp11a_j3        | 0.460975    | 0.321249  | 0            | 1         | 1         |
| Atp11a_j4        | 3.05855     | 1.75739   | 0            | 1         | 1         |
| Tfdp1_j1         | 0.103371    | 0.146107  | 0.499199     | 0.730131  | 1         |
| Tfdp1_j3         | 0.0322227   | 0.0671772 | 1.0599       | 0.621084  | 1         |
| Tfdp1_j7         | 0.0229701   | 0.114927  | 2.32289      | 0.348975  | 1         |
| Tfdp1_j6         | 0.372143    | 0.277087  | -0.425517    | 0.61609   | 0.848645  |
| Tfdp1_j15        | 0.00726857  | 0.0645806 | 3.15136      | 0.214766  | 1         |
| Arhgef10_j1      | 2.51796     | 2.86763   | 0            | 1         | 1         |
| Kbtbd11_j2       | 0           | 0.163591  | 0            | 1         | 1         |
| XLOC_032199      | 0.30951     | 0.396527  | 0.357434     | 0.624317  | 0.853348  |
| Zmat4_j4         | 0.00134747  | 0.279907  | 0            | 1         | 1         |
| Zmat4_j6         | 0.975227    | 1.7252    | 0            | 1         | 1         |
| Fgfr1_j2         | 5.68263     | 3.91971   | 0            | 1         | 1         |
| Fgfr1_j1         | 16.1865     | 14.2702   | 0            | 1         | 1         |
| Fgfr1_j4         | 6.12063     | 4.95699   | 0            | 1         | 1         |
| Whsc1l1_j2       | 0.375418    | 0.395979  | 0.0769259    | 0.763276  | 0.918453  |
| Whsc1l1_j10      | 1.13595     | 1.22929   | 0.113923     | 0.475547  | 0.771428  |
| Kcnu1_j2         | 0.229306    | 0.776151  | 1.75906      | 0.0096641 | 0.0835564 |
| Rnf170_j6        | 0           | 0.637405  | 1.79769e+308 | 2.22E-05  | 0.0006037 |
| Erlin2_j2        | 6.31402     | 6.35377   | 0.0090528    | 0.941016  | 0.98215   |
| XLOC_032238      | 0.0666189   | 0.161439  | 1.27699      | 0.212093  | 0.556966  |
| XLOC_032260      | 0.0182009   | 0.609602  | 5.06579      | 0.0012385 | 0.0169529 |
| Zdhhc2_j2        | 94.0745     | 101.078   | 0.103599     | 0.22727   | 0.574435  |
| XLOC_032271      | 0.0879051   | 0.158217  | 0.847888     | 0.272015  | 0.620843  |
| Sorbs2_j1        | 0.528461    | 0.502591  | 0            | 1         | 1         |
| Sorbs2_j6        | 1.16469     | 0.699936  | 0            | 1         | 1         |
| Sorbs2_j11       | 0.402953    | 0.926959  | 0            | 1         | 1         |
| Sorbs2_j15       | 1.16379     | 0.849793  | 0            | 1         | 1         |
| Sorbs2_j17       | 1.08035     | 0.876     | 0            | 1         | 1         |
| 4933411K20Rik_j2 | 0.504197    | 0.702447  | 0            | 1         | 1         |
| AK032387_j3      | 0.0388865   | 0.136402  | 1.81052      | 0.0318405 | 1         |
| Asb5_j2          | 0.0854539   | 0.163724  | 0.938052     | 0.546157  | 0.812888  |
| AK141659_j7      | 0.000120449 | 0.186004  | 10.5927      | 0.963709  | 0.989789  |
| Aadat            | 0.106076    | 0.131796  | 0.313204     | 0.717501  | 1         |
| 2700029M09Rik_j2 | 5.18788     | 5.43799   | 0.0679266    | 0.805115  | 0.935575  |
| Nek1_j1          | 2.43969     | 2.34758   | 0            | 1         | 1         |
| AK084432_j1      | 0.0499389   | 0.0927893 | 0.893796     | 0.616842  | 1         |
| AK084432_j2      | 0.0135475   | 0.0760627 | 2.48916      | 0.318595  | 1         |

|                  |           |           |               |           |           |
|------------------|-----------|-----------|---------------|-----------|-----------|
| Ddx60_j11        | 0.124304  | 0.272414  | 1.13193       | 0.105057  | 0.402375  |
| Spock3_j1        | 0         | 0.077061  | 1.79769e+308  | 0.281598  | 1         |
| Spock3_j3        | 3.77919   | 2.56421   | -0.559564     | 0.206504  | 0.55102   |
| Naf1_j3          | 0         | 0.114269  | 1.79769e+308  | 0.0525722 | 1         |
| Naf1_j2          | 0.112517  | 0         | -1.79769e+308 | 0.0227878 | 1         |
| Ints10_j3        | 0.450389  | 0.379142  | 0             | 1         | 1         |
| Ints10_j2        | 0.0739181 | 0.13359   | 0             | 1         | 1         |
| XLOC_032329      | 0.428001  | 0.437338  | 0.0311338     | 0.973284  | 0.992283  |
| Atp13a1_j1       | 0.477474  | 0.431382  | 0             | 1         | 1         |
| Atp13a1_j3       | 0.0819499 | 0.0314318 | 0             | 1         | 1         |
| Gmip_j2          | 0.213559  | 0.0881923 | -1.27591      | 0.124778  | 0.440123  |
| Nr2c2ap          | 1.11798   | 0.739871  | -0.595542     | 0.224652  | 0.571783  |
| Sugp2_j7         | 2.84312   | 2.75483   | 0             | 1         | 1         |
| XLOC_032354      | 0.305521  | 0.175836  | -0.797042     | 0.125913  | 0.441872  |
| Mtap1s_j4        | 0.150132  | 0.317353  | 1.07986       | 0.0681557 | 0.312536  |
| Myo9b_j18        | 1.38657   | 1.49139   | 0.105144      | 0.754578  | 0.915367  |
| Use1_j4          | 15.2132   | 16.2039   | 0.0910198     | 0.681246  | 0.880213  |
| Gtpbp3_j5        | 0.579157  | 0.842407  | 0.540563      | 0.0840357 | 0.353682  |
| Slc27a1_j5       | 0         | 0.469084  | 1.79769e+308  | 0.0002012 | 0.0038565 |
| Slc27a1_j7       | 0.380418  | 0.325118  | -0.226624     | 0.440639  | 0.749739  |
| Slc27a1_j6       | 1.21113   | 1.11203   | -0.123151     | 0.494058  | 0.782369  |
| Fam129c_j2       | 0.115015  | 0.162512  | 0.49872       | 0.509322  | 0.790813  |
| Fam129c_j3       | 0.165739  | 0.247088  | 0.576115      | 0.448921  | 0.755264  |
| Fam129c_j4       | 0         | 0.151354  | 1.79769e+308  | 0.0173827 | 1         |
| AK085371_j1      | 0.0981293 | 0.248077  | 1.33803       | 0.0400517 | 0.223996  |
| Tmem38a_j2       | 11.178    | 10.5917   | -0.0777293    | 0.543907  | 0.811113  |
| Nwd1_j8          | 0.0119553 | 0.102992  | 3.1068        | 0.0009056 | 1         |
| Nwd1_j7          | 0.0171158 | 0.0562847 | 1.71741       | 0.0497389 | 1         |
| Hmgxb4_j4        | 0.211438  | 0.115303  | 0             | 1         | 1         |
| Hmgxb4_j5        | 0         | 0.133814  | 0             | 1         | 1         |
| Tom1_j2          | 0.184465  | 0.190412  | 0.0457734     | 0.962553  | 0.989507  |
| Mcm5_j2          | 0.309472  | 0.404241  | 0.385406      | 0.426471  | 0.741234  |
| Prmt10_j1        | 0.112957  | 0.2321    | 0             | 1         | 1         |
| Slc10a7_j2       | 0.641623  | 0.570744  | 0             | 1         | 1         |
| Zfp827_j6        | 1.20789   | 0.627036  | -0.945875     | 0.0063014 | 0.0608641 |
| AK041972_j1      | 0.155166  | 0.18528   | 0.255894      | 0.753182  | 0.914687  |
| Otud4_j1         | 0.816246  | 0.847274  | 0             | 1         | 1         |
| Tbc1d9_j5        | 0.128485  | 0.153836  | 0.259796      | 0.747505  | 1         |
| Ndufb7_j1        | 67.2837   | 66.946    | 0             | 1         | 1         |
| Dnajb1           | 6.07386   | 8.90326   | 0.55172       | 0.0052846 | 0.0528232 |
| 1700067K01Rik_j2 | 0.447069  | 0.256985  | -0.798813     | 0.195296  | 0.537661  |
| Rfx1_j4          | 0.531937  | 0.507108  | -0.0689627    | 0.78782   | 0.929394  |
| Podnl1_j2        | 0.0642936 | 0.148584  | 1.20853       | 0.28279   | 1         |
| 4930432K21Rik_j7 | 3.25E-05  | 0.105518  | 11.6656       | 0.963963  | 1         |
| Cacna1a_j8       | 0.0826068 | 0.291133  | 0             | 1         | 1         |
| XLOC_032430      | 0.189431  | 0.221396  | 0.224951      | 0.563341  | 0.822528  |
| Dnase2a_j3       | 0         | 0.136714  | 0             | 1         | 1         |

|                  |            |           |               |           |           |
|------------------|------------|-----------|---------------|-----------|-----------|
| Prdx2_j3         | 25.2674    | 44.3977   | 0             | 1         | 1         |
| Hook2_j1         | 0.212115   | 0.399592  | 0.91368       | 0.0453847 | 0.243912  |
| Dhps_j3          | 0.0264386  | 0.143904  | 2.44439       | 0.0683967 | 1         |
| Man2b1_j5        | 0.399      | 0.619619  | 0.63499       | 0.163499  | 0.498839  |
| Lonp2_j3         | 7.35536    | 8.32215   | 0.178161      | 0.467022  | 0.766531  |
| Tmem188_j2       | 0.154448   | 0.512656  | 1.73086       | 0.0334299 | 0.199658  |
| Papd5_j2         | 3.0482     | 2.89316   | 0             | 1         | 1         |
| Adcy7_j1         | 0.492668   | 0.633475  | 0.362673      | 0.172097  | 0.509298  |
| Adcy7_j6         | 0.361288   | 0.379325  | 0.0702856     | 0.834799  | 0.946943  |
| Nod2_j6          | 0.191071   | 0.477466  | 1.32129       | 0.0085832 | 0.0764909 |
| Cyld             | 0.471022   | 0.46496   | 0             | 1         | 1         |
| XLOC_032460      | 0          | 0.0752664 | 1.79769e+308  | 0.0785998 | 1         |
| XLOC_032460      | 0.0197223  | 0.0595239 | 1.59364       | 0.309798  | 1         |
| XLOC_032460      | 0.225285   | 0         | -1.79769e+308 | 0.0181693 | 0.131811  |
| Chd9_j12         | 0          | 0.0494617 | 1.79769e+308  | 0.192887  | 1         |
| Lpcat2_j3        | 0          | 0.241457  | 1.79769e+308  | 0.0087408 | 0.0775264 |
| Gnao1_j4         | 0.181444   | 0.169767  | 0             | 1         | 1         |
| Nup93_j3         | 4.57447    | 5.8005    | 0             | 1         | 1         |
| Nup93_j4         | 6.03812    | 5.78823   | 0             | 1         | 1         |
| Nup93_j9         | 1.16076    | 4.96748   | 0             | 1         | 1         |
| Nlrc5_j4         | 0.0593958  | 0.0736841 | 0.310991      | 0.831483  | 1         |
| Nlrc5_j10        | 0.283405   | 0.230441  | -0.298468     | 0.5521    | 0.816191  |
| Arl2bp_j1        | 23.8424    | 21.9038   | 0             | 1         | 1         |
| Gpr56_j1         | 2.23018    | 12.563    | 0             | 1         | 1         |
| Gpr97_j4         | 0          | 0.0697001 | 1.79769e+308  | 0.0596645 | 1         |
| Gpr97_j5         | 0.0784021  | 0.244378  | 1.64015       | 0.0512137 | 0.262124  |
| Katnb1_j1        | 0.0830757  | 0.0680147 | -0.28858      | 0.810711  | 1         |
| Katnb1_j6        | 2.40509    | 3.83325   | 0.672478      | 0.0279406 | 0.177235  |
| A330008L17Rik_j1 | 0.271608   | 0.217606  | 0             | 1         | 1         |
| XLOC_032505      | 0          | 0.114664  | 1.79769e+308  | 0.0511101 | 1         |
| Cdh5_j1          | 0          | 0.137682  | 1.79769e+308  | 0.0031547 | 1         |
| Bean1_j7         | 4.63154    | 2.51024   | 0             | 1         | 1         |
| Cmtm3_j2         | 0          | 0.578851  | 1.79769e+308  | 0.0002568 | 0.0047223 |
| Cmtm3_j4         | 0          | 0.301861  | 1.79769e+308  | 0.0063574 | 0.0612842 |
| Cmtm3_j5         | 0          | 0.28742   | 1.79769e+308  | 0.0135218 | 0.106878  |
| Car7_j4          | 0          | 0.253857  | 1.79769e+308  | 0.008586  | 0.0765018 |
| Ces2g_j4         | 0.244663   | 0.123413  | -0.987304     | 0.253714  | 0.601839  |
| Cbfb_j4          | 0          | 0.486084  | 0             | 1         | 1         |
| Slc9a5_j9        | 1.71489    | 1.02014   | -0.749341     | 0.006736  | 0.0638843 |
| Plekhg4_j8       | 0.06466    | 0.0901121 | 0.478847      | 0.732038  | 1         |
| Plekhg4_j9       | 0.0811333  | 0.0420464 | -0.948314     | 0.484901  | 1         |
| Plekhg4_j14      | 0.00757069 | 0.114703  | 3.92133       | 0.279021  | 1         |
| Lrrc36_j1        | 0.133646   | 0.251407  | 0.91161       | 0.27617   | 0.624941  |
| Fam65a_j4        | 0.162658   | 0.0819528 | 0             | 1         | 1         |
| Ctcf             | 4.26812    | 4.33055   | 0             | 1         | 1         |
| Ctcf_j1          | 1.08437    | 1.28856   | 0             | 1         | 1         |
| Nutf2_j1         | 0          | 0.0493411 | 1.79769e+308  | 0.0479002 | 1         |

|                  |           |           |              |           |           |
|------------------|-----------|-----------|--------------|-----------|-----------|
| Nutf2_j5         | 0.834269  | 0.920371  | 0.141703     | 0.575157  | 0.828142  |
| Has3_j1          | 0.153839  | 0.0986384 | -0.641203    | 0.534341  | 0.805503  |
| AK015813_j4      | 1.76E-05  | 0.309145  | 14.1003      | 0.993735  | 0.998222  |
| AK015813_j3      | 0         | 0.501277  | 1.79769e+308 | 0.0047153 | 0.0485464 |
| Wwp2             | 3.74842   | 4.20275   | 0.165053     | 0.455447  | 0.759218  |
| XLOC_032552      | 0.175601  | 0.185083  | 0.0758751    | 0.93126   | 0.979039  |
| Pmfbp1_j11       | 0.417685  | 0.18385   | -1.18388     | 0.23016   | 0.577255  |
| Zfp821_j1        | 2.32607   | 2.2009    | 0            | 1         | 1         |
| Phlpp2_j4        | 0         | 0.151633  | 0            | 1         | 1         |
| Hydin_j2         | 0.0773054 | 0.176644  | 1.1922       | 0.319679  | 0.662991  |
| Aars_j2          | 4.59004   | 5.5983    | 0            | 1         | 1         |
| XLOC_032571      | 0.118513  | 0.208832  | 0.817301     | 0.364813  | 0.698781  |
| Cntnap4_j4       | 4.32304   | 4.26221   | -0.0204426   | 0.932816  | 0.979616  |
| Wwox_j1          | 5.73657   | 5.89593   | 0.039532     | 0.814897  | 0.939661  |
| XLOC_032582      | 2.19E-05  | 0.0644827 | 11.5222      | 0.980307  | 1         |
| Bcmo1_j1         | 0         | 0.150653  | 1.79769e+308 | 0.0127309 | 1         |
| Plcg2_j1         | 0.0790101 | 0.136823  | 0.792202     | 0.57862   | 1         |
| XLOC_032601      | 0.159602  | 0.232216  | 0.540992     | 0.444223  | 0.752052  |
| Gse1             | 0.537031  | 0.509598  | -0.0756465   | 0.786595  | 0.928645  |
| Foxc2            | 0.393927  | 0.558308  | 0.503131     | 0.101085  | 0.39362   |
| Map1lc3b         | 0.282651  | 0.439549  | 0            | 1         | 1         |
| Banp_j5          | 0         | 0.214106  | 1.79769e+308 | 0.0123709 | 0.100403  |
| Zfpm1_j5         | 0.22965   | 0.239356  | 0.0597233    | 0.926542  | 0.977218  |
| XLOC_032618      | 0.0732824 | 0.201324  | 1.45798      | 0.19115   | 0.533267  |
| Cdt1_j3          | 0.0786142 | 0.250598  | 1.67251      | 0.0608153 | 0.29079   |
| 4732415M23Rik_j4 | 0.191383  | 0.18903   | -0.0178494   | 0.982306  | 0.994634  |
| 4732415M23Rik    | 0         | 0.192851  | 1.79769e+308 | 0.0223317 | 0.152214  |
| Zfp276_j3        | 0.104419  | 0.0417176 | -1.32366     | 0.283016  | 1         |
| Zfp276_j4        | 0.32421   | 0.404417  | 0.318915     | 0.249291  | 0.596796  |
| Tcf25_j6         | 46.8708   | 50.3156   | 0            | 1         | 1         |
| Afg3l1_j3        | 4.9537    | 6.05958   | 0            | 1         | 1         |
| Rhou_j1          | 13.519    | 16.389    | 0            | 1         | 1         |
| AK013187_j1      | 2.46126   | 2.46635   | 0            | 1         | 1         |
| mKIAA0133_j5     | 0.456109  | 1.19007   | 0            | 1         | 1         |
| Arv1_j5          | 0         | 0.0759224 | 0            | 1         | 1         |
| Tsnax_j2         | 35.4717   | 34.0087   | 0            | 1         | 1         |
| BC021891_j1      | 0         | 0.0478445 | 1.79769e+308 | 0.038327  | 1         |
| BC021891_j2      | 0.109373  | 0.14208   | 0.377453     | 0.545014  | 1         |
| Slc35f3_j1       | 0         | 0.146486  | 1.79769e+308 | 0.0105332 | 1         |
| Pard3_j1         | 0.299439  | 0.340158  | 0.183947     | 0.646292  | 0.86363   |
| Pard3_j2         | 0.274617  | 0.273178  | -0.00757615  | 0.984483  | 0.995386  |
| Pard3_j9         | 0.155879  | 0.637132  | 2.03116      | 0.0003578 | 0.0061567 |
| XLOC_032660      | 0.0233624 | 0.0975034 | 2.06126      | 0.106384  | 1         |
| Itgb1_j6         | 0         | 0.0722797 | 1.79769e+308 | 0.0418213 | 1         |
| Insr_j3          | 0.0249876 | 0.0818939 | 1.71254      | 0.0210879 | 1         |
| AK019114_j3      | 0.974363  | 1.22501   | 0.330266     | 0.43167   | 0.743752  |
| Cd209f_j1        | 0.0557818 | 0.154751  | 1.47208      | 0.0987881 | 1         |

|                  |            |           |              |           |           |
|------------------|------------|-----------|--------------|-----------|-----------|
| Shcbp1_j1        | 0.155101   | 0.151697  | -0.032007    | 0.982433  | 0.994652  |
| Arglu1_j2        | 12.9225    | 13.4937   | 0            | 1         | 1         |
| Fam155a_j6       | 0.97379    | 0.187087  | 0            | 1         | 1         |
| Fam155a_j5       | 2.96036    | 5.5664    | 0            | 1         | 1         |
| Lig4_j2          | 0          | 0.379736  | 0            | 1         | 1         |
| Rab20_j1         | 0.107841   | 0.238933  | 1.1477       | 0.156959  | 0.490784  |
| Cars2            | 0.258881   | 0.998964  | 1.94815      | 0.0002119 | 0.0040269 |
| Grtp1_j2         | 0          | 0.196634  | 0            | 1         | 1         |
| Adprhl1_j2       | 0.204058   | 0.114801  | -0.829837    | 0.533741  | 0.805247  |
| Dcun1d2_j3       | 1.9143     | 3.25843   | 0            | 1         | 1         |
| Dcun1d2_j4       | 0.894772   | 0.886752  | 0            | 1         | 1         |
| Csmd1_j1         | 0.886038   | 0.813437  | -0.123337    | 0.583779  | 0.83315   |
| Csmd1_j8         | 0.32353    | 0.32858   | 0.0223434    | 0.969193  | 0.991369  |
| Csmd1_j11        | 1.27128    | 0.934205  | -0.444475    | 0.396892  | 0.721325  |
| Csmd1_j17        | 0.48052    | 0.733283  | 0.609775     | 0.337088  | 0.6775    |
| Nek3_j1          | 0          | 0.168077  | 1.79769e+308 | 0.0130963 | 0.104584  |
| Ckap2_j6         | 0.118478   | 0.530053  | 2.16151      | 0.0006435 | 0.010019  |
| Ckap2_j5         | 0.00034477 | 0.160964  | 8.86689      | 0.72771   | 0.903503  |
| Slc25a15_j7      | 0.727992   | 1.37046   | 0            | 1         | 1         |
| Vdac3_j8         | 11.4463    | 13.5923   | 0            | 1         | 1         |
| Vdac3_j7         | 14.3624    | 20.7645   | 0            | 1         | 1         |
| Ikbkb_j2         | 0          | 0.190513  | 0            | 1         | 1         |
| Golga7_j7        | 0.241816   | 0.709577  | 0            | 1         | 1         |
| Golga7_j8        | 1.27307    | 1.24976   | 0            | 1         | 1         |
| Adam5_j8         | 0          | 0.0832082 | 1.79769e+308 | 0.0658938 | 1         |
| Adam32_j3        | 0.140574   | 0.0780497 | -0.848868    | 0.462541  | 0.763366  |
| Adam9_j5         | 0.0989802  | 0.0114355 | 0            | 1         | 1         |
| Tacc1_j3         | 0.208554   | 0.291962  | 0            | 1         | 1         |
| XLOC_032738      | 0.0440925  | 0.0747679 | 0.761887     | 0.688477  | 1         |
| Letm2_j3         | 0.872603   | 0.707777  | 0            | 1         | 1         |
| Ddhd2_j5         | 6.53751    | 7.32995   | 0.165061     | 0.258266  | 0.60698   |
| Hgsnat_j1        | 5.25581    | 5.8335    | 0            | 1         | 1         |
| Fnta_j1          | 9.4721     | 11.2094   | 0            | 1         | 1         |
| Adrb3_j1         | 0.0247908  | 0.134201  | 2.43652      | 0.0865343 | 1         |
| Chrna6_j6        | 0.0700728  | 0.0550923 | 0            | 1         | 1         |
| Chrna6_j4        | 0.035055   | 0.0690785 | 0            | 1         | 1         |
| Chrna6_j5        | 1.25771    | 1.31844   | 0            | 1         | 1         |
| Chrna6_j7        | 1.00662    | 0.205837  | 0            | 1         | 1         |
| Leprotl1_j2      | 2.40604    | 2.70174   | 0            | 1         | 1         |
| Eri1_j5          | 1.89969    | 2.00656   | 0.0789598    | 0.642039  | 0.86192   |
| XLOC_032776      | 0          | 0.111704  | 1.79769e+308 | 0.0266733 | 1         |
| Fgl1_j4          | 0          | 0.0681731 | 1.79769e+308 | 0.197995  | 1         |
| Asah1_j8         | 0.281174   | 0.499629  | 0            | 1         | 1         |
| Tlr3             | 0          | 0.0581195 | 1.79769e+308 | 0.0400394 | 1         |
| 1700029J07Rik_j2 | 0          | 0.0638662 | 1.79769e+308 | 0.0975759 | 1         |
| Ccdc111_j2       | 0.00360851 | 0.369228  | 6.67697      | 0.0087937 | 0.0778536 |
| Odz3_j7          | 0.350007   | 0.419745  | 0.262129     | 0.304935  | 0.65013   |

|                  |           |           |              |           |           |
|------------------|-----------|-----------|--------------|-----------|-----------|
| Spcs3_j1         | 1.31586   | 0.267084  | 0            | 1         | 1         |
| Wdr17_j1         | 1.68542   | 1.37488   | -0.293809    | 0.159619  | 0.494017  |
| Wdr17_j3         | 0.175761  | 0.0416711 | -2.07649     | 0.0482739 | 0.252722  |
| Wdr17_j2         | 1.20355   | 1.15748   | -0.0563139   | 0.818728  | 0.941272  |
| BC088983_j1      | 0.119156  | 0.148059  | 0.313317     | 0.736317  | 1         |
| Anxa10_j1        | 0         | 0.112034  | 1.79769e+308 | 0.0395553 | 1         |
| Anxa10_j2        | 0         | 0.607456  | 1.79769e+308 | 0.0001992 | 0.0038249 |
| Cpe_j1           | 300.592   | 270.289   | -0.153304    | 0.0789919 | 0.341029  |
| 1810029B16Rik_j1 | 1.19003   | 1.16586   | -0.0295991   | 0.946722  | 0.984263  |
| Npy5r_j1         | 0.0621368 | 0.120213  | 0.952068     | 0.369778  | 1         |
| Psd3_j3          | 0         | 0.225889  | 0            | 1         | 1         |
| XLOC_032830      | 0.178372  | 0.962643  | 2.43211      | 0.0029713 | 0.0342128 |
| XLOC_032830      | 0.434223  | 0.483736  | 0.155784     | 0.836295  | 0.947519  |
| XLOC_032830      | 1.65233   | 1.65133   | -0.000874312 | 0.997973  | 0.999228  |
| XLOC_032832      | 0.113166  | 0.240786  | 1.08931      | 0.361694  | 0.696116  |
| Zfp869_j1        | 1.28889   | 1.33198   | 0.047443     | 0.853064  | 0.953424  |
| Zfp869_j2        | 4.02367   | 4.15915   | 0.047777     | 0.74912   | 0.912835  |
| Zfp866_j5        | 2.53784   | 2.74588   | 0.113669     | 0.391299  | 0.717886  |
| Gatad2a_j9       | 0.297226  | 1.36836   | 0            | 1         | 1         |
| Gatad2a_j10      | 1.53037   | 4.67317   | 0            | 1         | 1         |
| Upf1_j3          | 0.44861   | 1.22497   | 1.44921      | 1.27E-10  | 1.26E-08  |
| Upf1_j4          | 6.81878   | 6.73103   | -0.0186874   | 0.844582  | 0.950847  |
| Crtc1_j1         | 0.186772  | 0.411578  | 0            | 1         | 1         |
| Crtc1_j2         | 0         | 0.118293  | 0            | 1         | 1         |
| 2810422J05Rik_j1 | 5.62004   | 5.81378   | 0            | 1         | 1         |
| Ssbp4_j2         | 1.96325   | 2.48082   | 0            | 1         | 1         |
| Ssbp4_j3         | 0         | 0.42453   | 0            | 1         | 1         |
| Ifi30_j1         | 0.949473  | 1.32312   | 0.47875      | 0.415367  | 0.733216  |
| Arrdc2_j2        | 0.890913  | 1.32206   | 0            | 1         | 1         |
| Kcnn1_j6         | 0.434208  | 0.514151  | 0            | 1         | 1         |
| Kcnn1_j7         | 0.669639  | 0.375582  | 0            | 1         | 1         |
| Kcnn1_j8         | 0.433517  | 0.321968  | 0            | 1         | 1         |
| Ccdc124_j2       | 48.1865   | 53.8053   | 0            | 1         | 1         |
| Slc5a5_j1        | 4.85608   | 5.1071    | 0            | 1         | 1         |
| Gm15427_j12      | 0         | 0.218667  | 1.79769e+308 | 0.0953225 | 0.381208  |
| Gm15427_j13      | 0.151577  | 1.18193   | 2.96302      | 0.0046308 | 0.0478793 |
| Unc13a_j6        | 2.07075   | 2.71059   | 0            | 1         | 1         |
| Fcho1_j8         | 4.47876   | 3.39751   | 0            | 1         | 1         |
| Cyp4f18_j3       | 0.0597607 | 0.143416  | 1.26294      | 0.210153  | 1         |
| Cib3_j2          | 0.204698  | 0.0930063 | -1.1381      | 1         | 1         |
| Eps15l1_j2       | 10.4279   | 11.7397   | 0            | 1         | 1         |
| Calr3_j1         | 0.364506  | 0.463442  | 0.346447     | 0.462362  | 0.763237  |
| Large_j1         | 1.16859   | 1.56775   | 0            | 1         | 1         |
| Pou4f2_j1        | 2.29127   | 1.32216   | -0.793247    | 0.0136467 | 0.107551  |
| Smad1_j5         | 5.92675   | 10.5451   | 0            | 1         | 1         |
| Abce1_j1         | 14.8624   | 14.5312   | 0            | 1         | 1         |
| Smarca5_j6       | 0.0850351 | 0.11344   | 0.415802     | 0.742537  | 1         |



|                  |            |           |              |           |           |
|------------------|------------|-----------|--------------|-----------|-----------|
| Il15             | 0          | 0.226634  | 1.79769e+308 | 0.0243258 | 0.161275  |
| Zfp330_j4        | 2.10002    | 2.81697   | 0.423742     | 0.11857   | 0.428587  |
| Elmod2_j1        | 0.151436   | 0.303484  | 1.00291      | 0.0491024 | 0.255389  |
| Elmod2_j2        | 0.111452   | 0.21086   | 0.919858     | 0.12957   | 0.448468  |
| Scoc_j2          | 40.0656    | 29.4307   | 0            | 1         | 1         |
| Tecr_j4          | 0.23798    | 0.746822  | 0            | 1         | 1         |
| Il27ra_j1        | 0.088638   | 0.0459111 | 0            | 1         | 1         |
| Il27ra_j2        | 0.109383   | 0.10297   | 0            | 1         | 1         |
| Dcaf15_j1        | 0.0582615  | 0.26559   | 2.18859      | 0.0014375 | 0.0190767 |
| Cc2d1a_j4        | 0.00856102 | 0.15839   | 0            | 1         | 1         |
| Zswim4_j1        | 2.4212     | 3.67169   | 0            | 1         | 1         |
| Ccdc130_j1       | 0          | 0.565067  | 1.79769e+308 | 3.68E-05  | 0.0009197 |
| AK039159_j2      | 0.490732   | 0.586306  | 0.256716     | 0.39039   | 0.717228  |
| Neto2_j3         | 1.04976    | 1.56057   | 0            | 1         | 1         |
| Neto2            | 0.518218   | 1.32974   | 0            | 1         | 1         |
| Itfg1_j1         | 56.9343    | 50.4022   | 0            | 1         | 1         |
| Abcc12_j3        | 0.0315513  | 0.318135  | 3.33386      | 0.0095506 | 0.0827658 |
| Cbln1_j1         | 0.120037   | 0.171666  | 0.516128     | 0.522098  | 0.79866   |
| Tox3_j1          | 4.01066    | 3.09112   | 0            | 1         | 1         |
| Rpgrip1_j2       | 0.0406863  | 0.154173  | 1.92194      | 0.0051326 | 1         |
| Rpgrip1_j1       | 0.0681711  | 0.0788858 | 0.210605     | 0.751248  | 1         |
| Amfr_j2          | 39.9136    | 45.7578   | 0            | 1         | 1         |
| Bbs2_j1          | 0.752328   | 0.749994  | 0            | 1         | 1         |
| Dok4_j5          | 0.319348   | 0.500757  | 0            | 1         | 1         |
| Ccdc102a_j3      | 1.81764    | 2.10775   | 0.213634     | 0.563055  | 0.822343  |
| Kifc3_j1         | 4.88315    | 4.56703   | -0.0965565   | 0.432509  | 0.744252  |
| Cngb1_j1         | 0.0378083  | 0.139312  | 1.88154      | 0.186972  | 1         |
| Cdh11_j7         | 12.1837    | 11.9985   | 0            | 1         | 1         |
| Cdh11_j8         | 4.70529    | 4.01808   | 0            | 1         | 1         |
| Cdh11_j9         | 5.06976    | 3.85873   | 0            | 1         | 1         |
| Dync1li2_j5      | 12.2725    | 12.8681   | 0            | 1         | 1         |
| Kctd19_j3        | 0          | 0.0527755 | 1.79769e+308 | 0.0590018 | 1         |
| Kctd19_j2        | 0.168739   | 0.0697934 | -1.27363     | 0.158056  | 0.492267  |
| Zdhhc1_j1        | 1.52719    | 1.87628   | 0            | 1         | 1         |
| Zdhhc1_j5        | 2.90596    | 2.54214   | 0            | 1         | 1         |
| Zdhhc1_j2        | 2.36523    | 2.52122   | 0            | 1         | 1         |
| Zdhhc1_j3        | 1.48858    | 1.41688   | 0            | 1         | 1         |
| Zdhhc1_j4        | 6.12557    | 5.52499   | 0            | 1         | 1         |
| AK086852         | 0.514458   | 0.636847  | 0            | 1         | 1         |
| Ranbp10_j3       | 1.76659    | 1.29448   | 0            | 1         | 1         |
| Psmb10_j5        | 14.4181    | 14.7517   | 0.0329958    | 0.814172  | 0.939438  |
| Slc12a4_j2       | 1.12043    | 0.991964  | -0.175699    | 0.481013  | 0.774698  |
| Dpep2_j1         | 0.0470019  | 0.135556  | 1.5281       | 0.126007  | 1         |
| XLOC_033021      | 0          | 0.0923244 | 1.79769e+308 | 0.0568669 | 1         |
| 2400003C14Rik_j4 | 7.7573     | 8.04279   | 0            | 1         | 1         |
| AK038784         | 0          | 0.111352  | 0            | 1         | 1         |
| AK076897_j2      | 0          | 0.174561  | 1.79769e+308 | 0.0618894 | 0.294254  |

|                  |           |           |              |           |           |
|------------------|-----------|-----------|--------------|-----------|-----------|
| Il34_j4          | 2.00446   | 4.49046   | 0            | 1         | 1         |
| Fuk_j2           | 0         | 0.239952  | 1.79769e+308 | 3.31E-06  | 0.0001186 |
| Mrcl_j5          | 0.157454  | 0.317241  | 1.01064      | 0.24782   | 0.595123  |
| AK020517_j2      | 0         | 0.0702967 | 0            | 1         | 1         |
| Mlkl_j3          | 0         | 0.0841253 | 1.79769e+308 | 0.0549855 | 1         |
| Fa2h_j1          | 0.845935  | 1.16982   | 0.467666     | 0.143868  | 0.470876  |
| Wdr59_j3         | 1.97551   | 2.27006   | 0            | 1         | 1         |
| 2310061C15Rik_j4 | 0         | 0.460525  | 1.79769e+308 | 1.17E-07  | 6.15E-06  |
| 1700030J22Rik_j5 | 0.0907593 | 0.0510028 | -0.831468    | 0.468327  | 1         |
| Pkd1l2_j2        | 0.0638298 | 0.100983  | 0.661811     | 0.549547  | 1         |
| Pkd1l2_j6        | 0.0249166 | 0.130053  | 2.38392      | 0.0738811 | 1         |
| Pkd1l2_j16       | 0.186598  | 0.379879  | 1.02561      | 1         | 1         |
| Slc38a8_j3       | 0.0454755 | 0.0952603 | 1.06679      | 0.546623  | 1         |
| Mbtps1_j3        | 5.72161   | 6.84167   | 0            | 1         | 1         |
| Hsdl1_j2         | 7.05196   | 8.80323   | 0            | 1         | 1         |
| Taf1c_j2         | 0.93027   | 1.21201   | 0.381685     | 0.237363  | 0.584096  |
| Kcng4_j2         | 1.81187   | 0.707663  | -1.35635     | 1.99E-07  | 9.83E-06  |
| Kcng4_j1         | 0.0578982 | 0.22144   | 1.93533      | 0.0070876 | 0.0665069 |
| AK087264_j2      | 0.0787991 | 0.15443   | 0.970702     | 0.351341  | 1         |
| Mthfsd_j3        | 0.424507  | 0.401279  | 0            | 1         | 1         |
| Mthfsd_j8        | 1.1612    | 1.30631   | 0            | 1         | 1         |
| Zcchc14_j7       | 1.06882   | 1.76997   | 0            | 1         | 1         |
| Fam38a_j4        | 0.512402  | 1.25602   | 1.29351      | 0.0348997 | 0.205266  |
| Fam38a_j5        | 0.0234252 | 0.0743017 | 1.66533      | 0.336971  | 1         |
| Galns_j6         | 0.181348  | 0.66256   | 1.86929      | 0.0142985 | 0.111143  |
| AK032654_j5      | 0.0636296 | 0.110425  | 0.795301     | 0.453498  | 1         |
| Sult5a1_j4       | 0.0281215 | 0.155761  | 2.46959      | 0.233719  | 1         |
| 1300018l17Rik    | 0.355223  | 0.228811  | -0.634565    | 0.269974  | 0.619086  |
| 1300018l17Rik_j2 | 2.1183    | 3.37908   | 0.673725     | 0.0007985 | 0.011973  |
| Fanca_j2         | 0         | 0.0778448 | 1.79769e+308 | 0.0048402 | 1         |
| XLOC_033119      | 0         | 0.134164  | 0            | 1         | 1         |
| XLOC_033123      | 0         | 0.099762  | 1.79769e+308 | 0.0821707 | 1         |
| 1700054N08Rik_j3 | 0.321291  | 0.162816  | 0            | 1         | 1         |
| Nup133_j1        | 1.28865   | 1.28161   | 0            | 1         | 1         |
| Taf5l_j1         | 0.421946  | 0.315458  | 0            | 1         | 1         |
| Pgbd5_j1         | 7.0485    | 6.38346   | 0            | 1         | 1         |
| Agt_j2           | 0         | 0.139526  | 0            | 1         | 1         |
| Ttc13_j6         | 1.3185    | 1.73952   | 0            | 1         | 1         |
| Ttc13_j7         | 1.46218   | 1.09992   | 0            | 1         | 1         |
| Sipa1l2_j4       | 0.405482  | 0.254341  | -0.672875    | 0.383791  | 0.71322   |
| Pcnxl2_j1        | 0.0395992 | 0.0604066 | 0            | 1         | 1         |
| Tomm20_j3        | 0.533944  | 0.258541  | 0            | 1         | 1         |
| Rbm34_j1         | 0.754098  | 2.08714   | 0            | 1         | 1         |
| Alkbh8           | 0.419184  | 0.0550511 | 0            | 1         | 1         |
| Alkbh8_j5        | 0.31016   | 0.0435042 | 0            | 1         | 1         |
| Alkbh8           | 0.605306  | 0.410211  | 0            | 1         | 1         |
| Cwf19l2          | 2.49163   | 2.0939    | 0            | 1         | 1         |

|                  |           |                 |             |           |           |
|------------------|-----------|-----------------|-------------|-----------|-----------|
| Cwf19l2_j2       | 1.72281   | 0.932691        | 0           | 1         | 1         |
| Gucy1a2          | 0.564818  | 0.524125        | -0.107874   | 0.606264  | 0.844912  |
| Kbtbd3           | 1.48581   | 1.32414         | -0.16619    | 0.343154  | 0.683042  |
| Kbtbd3_j1        | 0.104155  | 0.0465948       | -1.16049    | 0.221742  | 1         |
| 8430410K20Rik    | 9.13867   | 8.66484         | 0           | 1         | 1         |
| Casp1            | 1.15768   | 1.24779         | 0           | 1         | 1         |
| Casp1_j1         | 0.980226  | 1.27436         | 0           | 1         | 1         |
| Casp4_j1         | 0.071485  | 0.0272072       | -1.39365    | 0.487234  | 1         |
| Casp4_j4         | 0.186964  | 0.167634        | -0.157445   | 0.870138  | 0.958679  |
| Casp12           | 2.01869   | 1.52631         | -0.403375   | 0.0459332 | 0.245257  |
| Pdgfd            | 0.0912431 | 0.0930408       | 0.0281476   | 0.972199  | 1         |
| Dcun1d5          | 1.66319   | 1.58999         | -0.064935   | 0.611731  | 0.847112  |
| Tmem123          | 1.81692   | 2.08708         | 0           | 1         | 1         |
| Tmem123_j1       | 0.228563  | 0.412391        | 0           | 1         | 1         |
| Trpc6_j1         | 2.5362    | 1.79671         | -0.497308   | 0.0041575 | 0.0441183 |
| Pgr              | 0.970537  | 0.704289        | -0.462615   | 0.0079416 | 0.0721859 |
| Gm16485          | 0.630317  | 0.495159        | -0.348185   | 0.136204  | 0.45922   |
| XLOC_034135      | 0.204249  | 0 -1.79769e+308 |             | 0.012488  | 0.101118  |
| Maml2            | 0.842026  | 0.681308        | -0.305557   | 0.1772    | 0.516404  |
| Mttr2_j1         | 8.63056   | 6.7131          | 0           | 1         | 1         |
| Fam76b           | 1.3437    | 1.19185         | 0           | 1         | 1         |
| Sesn3            | 1.91863   | 1.83312         | 0           | 1         | 1         |
| Sesn3_j2         | 0.853084  | 3.34359         | 0           | 1         | 1         |
| Cwc15            | 44.2663   | 47.3119         | 0.0959956   | 0.335154  | 0.675781  |
| Cwc15_j2         | 5.80829   | 5.78053         | -0.00691178 | 0.978517  | 0.993756  |
| Mre11a           | 0.882111  | 0.715399        | 0           | 1         | 1         |
| Mre11a_j1        | 0.0797017 | 0.177533        | 0           | 1         | 1         |
| Gpr83            | 1.00775   | 0.646843        | -0.639649   | 0.0169297 | 0.12535   |
| Gpr83            | 0.177223  | 0.067073        | -1.40176    | 0.114446  | 0.420956  |
| 2200002K05Rik    | 1.15217   | 0.824387        | 0           | 1         | 1         |
| Fn5              | 0.947778  | 1.67208         | 0.81902     | 0.0400596 | 0.224015  |
| BC017612_j1      | 0.7634    | 1.0938          | 0.518834    | 0.247434  | 0.594947  |
| BC017612_j3      | 0.870487  | 0.612534        | -0.507035   | 0.436044  | 0.746749  |
| BC017612         | 1.17607   | 0.300078        | -1.97057    | 0.0197751 | 0.139756  |
| Slc36a4          | 0.561023  | 0.360443        | 0           | 1         | 1         |
| Slc36a4_j4       | 2.10108   | 1.88921         | 0           | 1         | 1         |
| Slc36a4_j5       | 4.67096   | 3.18579         | 0           | 1         | 1         |
| Chordc1          | 7.9891    | 7.01526         | -0.187538   | 0.0791651 | 0.341535  |
| Zfp317_j9        | 1.52557   | 1.43666         | 0           | 1         | 1         |
| Zfp317_j8        | 0.730315  | 1.39297         | 0           | 1         | 1         |
| Zfp317_j10       | 1.17759   | 0.671426        | 0           | 1         | 1         |
| Zfp846           | 0.198538  | 0.0611032       | 0           | 1         | 1         |
| Zfp846_j2        | 0.212251  | 0.140046        | 0           | 1         | 1         |
| Ubl5_j4          | 49.4559   | 52.6243         | 0           | 1         | 1         |
| Ubl5_j6          | 56.7519   | 63.0431         | 0           | 1         | 1         |
| Pin1             | 10.735    | 9.81858         | -0.128729   | 0.184827  | 0.525128  |
| A230050P20Rik_j1 | 0.160808  | 0.165145        | 0.0383955   | 0.959176  | 0.988355  |

|               |             |                        |            |           |           |
|---------------|-------------|------------------------|------------|-----------|-----------|
| A230050P20Rik | 4.08487     | 3.77521                | -0.113734  | 0.602915  | 0.843195  |
| Ppan          | 4.56449     | 5.42825                | 0.250033   | 0.135121  | 0.457301  |
| Mrpl4         | 16.5367     | 17.7586                | 0          | 1         | 1         |
| Icam5_j1      | 0.319771    | 0 -1.79769e+308        |            | 0.0038086 | 0.0414262 |
| Pde4a         | 1.58152     | 0.833959               | -0.923264  | 0.0001249 | 0.0025829 |
| Atg4d         | 4.47938     | 4.04111                | -0.148547  | 0.179231  | 0.518846  |
| Slc44a2_j1    | 5.74042     | 6.45065                | 0.168288   | 0.160871  | 0.495486  |
| Ilf3          | 6.37783     | 6.41566                | 0          | 1         | 1         |
| Ilf3          | 4.8068      | 4.87227                | 0          | 1         | 1         |
| Qtrt1         | 0.58624     | 0.306353               | -0.936296  | 0.113751  | 0.419374  |
| Dnm2_j1       | 1.55017     | 3.44207                | 0          | 1         | 1         |
| Dnm2_j4       | 4.52737     | 3.93404                | 0          | 1         | 1         |
| Dnm2_j7       | 2.7491      | 2.24414                | 0          | 1         | 1         |
| AB124611      | 0.169664    | 0.262146               | 0.62769    | 0.262643  | 0.611657  |
| Hide1_j1      | 0.241606    | 0.112898               | -1.09763   | 0.228317  | 0.575412  |
| Carm1         | 15.44       | 16.9993                | 0          | 1         | 1         |
| Smarca4_j2    | 0.514149    | 0.118945               | 0          | 1         | 1         |
| Ldlr          | 55.9654     | 66.0661                | 0.239376   | 0.0052445 | 0.0525411 |
| Ccdc159_j3    | 2.09803     | 1.96228                | 0          | 1         | 1         |
| Ccdc159_j4    | 5.0161      | 6.01193                | 0          | 1         | 1         |
| 2310047B19Rik | 2.11069     | 1.85316                | -0.187731  | 0.423179  | 0.738683  |
| Prkcsh_j1     | 2.11487     | 2.38634                | 0.174232   | 0.197366  | 0.540247  |
| Prkcsh        | 17.8758     | 21.2087                | 0.246649   | 0.0210791 | 0.14609   |
| Pigyl         | 11.8269     | 12.3591                | 0.0635045  | 0.660522  | 0.871208  |
| Zfp809        | 2.09759     | 1.65355                | 0          | 1         | 1         |
| 9530077C05Rik | 6.36456     | 5.75833                | -0.144409  | 0.279151  | 0.627839  |
| Bbs9_j4       | 0.997633    | 1.41832                | 0.507607   | 0.0330874 | 0.198267  |
| Bbs9_j1       | 0.210342    | 0 -1.79769e+308        |            | 5.93E-06  | 0.0001966 |
| Bbs9_j7       | 0.440785    | 0.775998               | 0.81598    | 0.0366339 | 0.211661  |
| Bbs9_j9       | 0.000130116 | 0.203                  | 10.6075    | 0.911413  | 0.972265  |
| Bmper         | 1.26257     | 1.14286                | 0          | 1         | 1         |
| Bmper_j1      | 1.35142     | 1.43218                | 0          | 1         | 1         |
| Sept7_j4      | 87.6279     | 82.3593                | -0.0894573 | 0.299361  | 0.646208  |
| Eepd1_j1      | 12.2946     | 12.2873                | 0          | 1         | 1         |
| Eepd1         | 32.6653     | 28.7814                | 0          | 1         | 1         |
| B3gat1_j1     | 0.145939    | 0 -1.79769e+308        |            | 0.0001903 | 0.0036803 |
| B3gat1        | 0.94994     | 0.603103               | -0.655431  | 0.0146555 | 0.113052  |
| Thyn1         | 14.273      | 15.1373                | 0.0848184  | 0.574929  | 0.828142  |
| Thyn1_j2      | 5.4171      | 5.52836                | 0.0293297  | 0.898487  | 0.967622  |
| Igsf9b_j2     | 0.574602    | 0.445458               | 0          | 1         | 1         |
| Opcml_j4      | 0           | 0.105721 1.79769e+308  |            | 0.0017949 | 1         |
| XLOC_034190   | 0.193399    | 0.120718               | -0.679942  | 0.198498  | 0.541655  |
| Snx19         | 13.4522     | 11.6814                | 0          | 1         | 1         |
| Adamts8       | 1.13138     | 1.07327                | -0.0760711 | 0.682824  | 0.881179  |
| Zbtb44        | 0           | 0.0792065 1.79769e+308 |            | 0.0015735 | 1         |
| Zbtb44        | 1.27132     | 1.09547                | -0.214771  | 0.215643  | 0.561479  |
| Nfrkb_j1      | 0.191725    | 0.259828               | 0.438521   | 0.183691  | 0.524376  |

|                  |           |           |               |           |           |
|------------------|-----------|-----------|---------------|-----------|-----------|
| Nfrkb_j7         | 0.310783  | 0.369125  | 0.248204      | 0.44304   | 0.751132  |
| XLOC_034198      | 0.26334   | 0.113349  | -1.21616      | 0.109072  | 0.410772  |
| Arhgap32_j4      | 0.499866  | 0.236879  | -1.0774       | 0.000554  | 0.008889  |
| Arhgap32         | 0.179702  | 0.0205098 | -3.13122      | 0.000952  | 0.0137445 |
| Ets1_j1          | 0.612396  | 0.405199  | 0             | 1         | 1         |
| Ets1             | 1.40322   | 1.19755   | 0             | 1         | 1         |
| Kirrel3_j4       | 3.99376   | 3.25882   | 0             | 1         | 1         |
| Srpr_j2          | 1.34583   | 0         | 0             | 1         | 1         |
| Srpr             | 12.5276   | 12.6773   | 0             | 1         | 1         |
| Rpusd4_j1        | 0.569254  | 0.575161  | 0             | 1         | 1         |
| Cdon_j3          | 0.275566  | 0.172041  | -0.679646     | 0.221488  | 0.568639  |
| Pate2_j3         | 0.210717  | 0.132476  | -0.669577     | 0.386927  | 0.714832  |
| Fez1_j1          | 0.378656  | 0         | 0             | 1         | 1         |
| Fez1_j3          | 1.27452   | 1.48993   | 0             | 1         | 1         |
| Fez1_j8          | 22.6148   | 16.427    | 0             | 1         | 1         |
| Tmem218_j2       | 5.21198   | 4.2015    | -0.310925     | 0.0317491 | 0.192954  |
| Hepacam_j1       | 0.115009  | 0         | -1.79769e+308 | 0.0005049 | 1         |
| Hepacam          | 1.26273   | 1.45101   | 0.20051       | 0.328779  | 0.671184  |
| Robo4_j3         | 0.101566  | 0         | -1.79769e+308 | 0.0009183 | 1         |
| Robo4            | 0.992525  | 0.349959  | -1.50392      | 2.59E-05  | 0.0006841 |
| XLOC_034217      | 0.0723587 | 0.098635  | 0.446934      | 0.601648  | 1         |
| BC024479_j2      | 0.243527  | 0.209515  | -0.21703      | 0.565549  | 0.8239    |
| BC024479_j6      | 1.13544   | 0.754506  | -0.589647     | 0.130103  | 0.449122  |
| Esam_j3          | 0.142507  | 0.0316231 | -2.17199      | 0.0113756 | 0.0943363 |
| Esam_j4          | 0.703861  | 0.772586  | 0.134405      | 0.787194  | 0.929019  |
| Esam_j7          | 7.93073   | 8.19371   | 0.0470635     | 0.739336  | 0.908509  |
| Siae             | 0.685388  | 0.587544  | -0.222224     | 0.272123  | 0.620886  |
| Vwa5a_j5         | 39.5017   | 36.3654   | -0.119347     | 0.230028  | 0.577072  |
| Zfp202_j3        | 0.124506  | 0         | -1.79769e+308 | 0.0003804 | 1         |
| Zfp202_j5        | 0.172069  | 0.194198  | 0.174537      | 0.769663  | 0.921491  |
| Scn3b_j2         | 5.59166   | 4.79302   | 0             | 1         | 1         |
| Scn3b            | 3.07582   | 2.24168   | 0             | 1         | 1         |
| 9030425E11Rik_j2 | 2.53225   | 1.92267   | -0.397312     | 0.270905  | 0.620012  |
| XLOC_034229      | 0.164332  | 0.12984   | -0.339873     | 0.664218  | 0.87286   |
| XLOC_034229      | 0.117962  | 0.173648  | 0.557849      | 0.414701  | 0.732864  |
| AK014147_j3      | 0.123572  | 0.02783   | -2.15063      | 0.0620796 | 1         |
| 2610203C20Rik    | 3.18667   | 3.15803   | -0.0130246    | 0.942711  | 0.982647  |
| XLOC_034230      | 0.313219  | 0.159951  | -0.969546     | 0.0525276 | 0.266239  |
| XLOC_034230      | 0.156712  | 0.0479732 | -1.70781      | 0.0623318 | 0.295579  |
| XLOC_034235      | 0.221594  | 0.118794  | -0.899461     | 0.0664915 | 0.30809   |
| XLOC_034236      | 0.0881798 | 0.0245985 | -1.84188      | 0.347055  | 1         |
| Pvrl1            | 3.76772   | 3.91337   | 0             | 1         | 1         |
| XLOC_034240      | 0.186636  | 0.0938872 | -0.991225     | 0.16968   | 0.506699  |
| Thy1             | 143.023   | 187.632   | 0             | 1         | 1         |
| Usp2             | 1.31934   | 1.08432   | 0             | 1         | 1         |
| C1qtnf5          | 1.25777   | 1.02134   | -0.300407     | 0.352796  | 0.689574  |
| C1qtnf5          | 4.11396   | 4.13566   | 0.00758986    | 0.970167  | 0.991582  |

|                  |           |          |               |           |           |
|------------------|-----------|----------|---------------|-----------|-----------|
| AK134203_j1      | 6.53216   | 7.10361  | 0             | 1         | 1         |
| Mcam_j4          | 10.0752   | 10.0811  | 0             | 1         | 1         |
| Dpagt1           | 10.0252   | 10.1511  | 0.0180033     | 0.85991   | 0.955708  |
| Hyou1            | 12.6587   | 13.1607  | 0.056114      | 0.58661   | 0.834523  |
| Slc37a4_j1       | 4.20031   | 3.93667  | -0.093519     | 0.645372  | 0.863342  |
| Rps25_j1         | 0.494242  | 0.521464 | 0             | 1         | 1         |
| Gm9830           | 21.1247   | 18.1299  | -0.220561     | 0.0558462 | 0.276193  |
| AK078316         | 0.253176  | 0.206051 | -0.297135     | 0.492563  | 0.781115  |
| AK078316_j2      | 0.830435  | 0.437107 | -0.925879     | 0.167857  | 0.50444   |
| Bcl9l_j2         | 0.673097  | 0.81421  | 0             | 1         | 1         |
| Bcl9l            | 0.418441  | 0.357909 | 0             | 1         | 1         |
| Ddx6             | 1.77059   | 0.715813 | -1.30658      | 1.28E-07  | 6.70E-06  |
| Ift46_j4         | 0.981384  | 0.720003 | 0             | 1         | 1         |
| Ift46_j6         | 4.96296   | 6.97612  | 0             | 1         | 1         |
| Mpzl3            | 2.8103    | 2.55219  | -0.138987     | 0.350103  | 0.687688  |
| Scn4b            | 0.0773131 | 0        | 0             | 1         | 1         |
| Scn4b_j6         | 17.9728   | 7.8888   | 0             | 1         | 1         |
| BC049352         | 0.806587  | 0.420355 | -0.940222     | 0.0002674 | 0.0048662 |
| Fxyd6            | 1.58735   | 1.78467  | 0             | 1         | 1         |
| Fxyd6            | 2.67876   | 2.87224  | 0             | 1         | 1         |
| Fxyd6_j2         | 2.79869   | 0.548183 | 0             | 1         | 1         |
| Fxyd2            | 478.236   | 423.516  | -0.175306     | 0.0410299 | 0.227643  |
| Dscaml1_j4       | 0.0881051 | 0        | -1.79769e+308 | 0.0070304 | 1         |
| Sik3_j3          | 1.21562   | 0.593727 | 0             | 1         | 1         |
| Sik3             | 1.80858   | 1.68776  | 0             | 1         | 1         |
| Sik3_j5          | 0         | 0.629701 | 0             | 1         | 1         |
| Zfp259           | 11.3984   | 13.9265  | 0.289007      | 0.0056815 | 0.0560207 |
| Bud13            | 0.333495  | 0.266132 | -0.325524     | 0.432614  | 0.744302  |
| 2900052N01Rik    | 1.5327    | 1.39962  | -0.131042     | 0.420054  | 0.736553  |
| 2900052N01Rik_j5 | 0.438203  | 0.199868 | -1.13255      | 0.109432  | 0.411747  |
| Cadm1            | 4.6684    | 4.06635  | 0             | 1         | 1         |
| Cadm1_j4         | 0.346057  | 0        | 0             | 1         | 1         |
| Cadm1_j8         | 5.78646   | 7.41318  | 0             | 1         | 1         |
| Fam55d_j2        | 2.18137   | 2.91155  | 0.416551      | 0.012595  | 0.101765  |
| Usp28_j1         | 1.17166   | 1.13959  | -0.0400361    | 0.861001  | 0.956054  |
| Usp28            | 1.02454   | 1.23715  | 0.272039      | 0.16013   | 0.49462   |
| Zw10             | 3.67465   | 3.89572  | 0.0842843     | 0.59045   | 0.83664   |
| Tmprss5_j7       | 1.34335   | 1.05556  | -0.347823     | 0.27825   | 0.627143  |
| Drd2_j1          | 0.116589  | 0.129598 | 0.152608      | 0.854102  | 1         |
| Drd2             | 0.231752  | 0.108021 | -1.10126      | 0.15737   | 0.491377  |
| Drd2_j8          | 0.24909   | 0.218947 | -0.186084     | 0.749679  | 0.913026  |
| 1600029D21Rik_j1 | 0.163215  | 0.175688 | 0.106241      | 0.885464  | 0.963679  |
| Ii18_j1          | 1.59552   | 2.00221  | 0.327563      | 0.221389  | 0.568571  |
| Cryab            | 2.47869   | 2.13381  | -0.216147     | 0.253402  | 0.601435  |
| Alg9             | 1.14498   | 1.21724  | 0.0882825     | 0.602378  | 0.842855  |
| Ppp2r1b          | 0.590247  | 1.01885  | 0.787555      | 0.0019137 | 0.0241153 |
| Arhgap20_j2      | 0.260537  | 0        | 0             | 1         | 1         |

|                  |           |           |               |           |           |
|------------------|-----------|-----------|---------------|-----------|-----------|
| Arhgap20         | 1.21949   | 0.254201  | 0             | 1         | 1         |
| Rdx              | 25.8189   | 24.774    | -0.0596052    | 0.501226  | 0.785345  |
| Kdelc2           | 4.16282   | 3.54586   | -0.231426     | 0.113278  | 0.418908  |
| Kdelc2_j2        | 0.755222  | 0.737713  | -0.0338398    | 0.926895  | 0.977384  |
| 4930550C14Rik    | 0.200069  | 0.0340321 | -2.55553      | 0.13225   | 0.452557  |
| Slc35f2_j1       | 0.0987044 | 0.0486421 | 0             | 1         | 1         |
| Slc35f2_j5       | 0.646532  | 0.047053  | 0             | 1         | 1         |
| Gldn_j1          | 0.71161   | 0.297403  | -1.25866      | 0.0008759 | 0.0128557 |
| Gldn             | 1.52974   | 2.8426    | 0.893921      | 4.86E-09  | 3.62E-07  |
| Idh3a            | 26.7549   | 25.1467   | 0             | 1         | 1         |
| Idh3a_j1         | 12.3865   | 8.39437   | 0             | 1         | 1         |
| Dnaja4           | 14.8346   | 12.9211   | 0             | 1         | 1         |
| Crabp1           | 4.47955   | 3.84241   | -0.221343     | 0.289686  | 0.637033  |
| Ireb2_j1         | 0.315841  | 0.071391  | 0             | 1         | 1         |
| Agphd1           | 0.477465  | 0.246239  | -0.955338     | 0.0088456 | 0.0782138 |
| Agphd1_j3        | 0.334871  | 0.558901  | 0.738989      | 0.0213363 | 0.147266  |
| Psm4             | 27.5217   | 28.6214   | 0.056523      | 0.608241  | 0.84562   |
| Psm4_j7          | 1.63396   | 1.55386   | -0.0725119    | 0.846967  | 0.951557  |
| Ube2q2_j3        | 0.381012  | 0.198101  | -0.943601     | 0.123877  | 0.438501  |
| Ube2q2_j4        | 0.667244  | 0.0701714 | -3.24926      | 0.0308493 | 0.189256  |
| Fbxo22           | 5.16257   | 4.34117   | -0.250004     | 0.0840394 | 0.353682  |
| Al118078_j2      | 0.496908  | 0.071233  | -2.80236      | 0.0012584 | 0.0171859 |
| Isl2             | 7.79139   | 6.2179    | -0.325453     | 0.000969  | 0.0139384 |
| XLOC_034312      | 0.889405  | 0.472417  | -0.91278      | 0.181223  | 0.521107  |
| Rcn2             | 22.0587   | 20.4412   | -0.109865     | 0.300672  | 0.647263  |
| Pstpip1          | 2.32024   | 2.25856   | -0.0388681    | 0.859165  | 0.955489  |
| Pstpip1_j1       | 4.50408   | 4.00582   | -0.169135     | 0.412867  | 0.731852  |
| Hmg20a           | 10.5008   | 9.81572   | -0.0973298    | 0.370001  | 0.703535  |
| Cspg4            | 1.39689   | 1.57476   | 0.17291       | 0.215523  | 0.561474  |
| Snupn            | 1.16444   | 1.1145    | -0.0632377    | 0.741638  | 0.90937   |
| Ptpn9            | 4.51492   | 3.76095   | 0             | 1         | 1         |
| Sin3a_j1         | 0.518138  | 0.385566  | 0             | 1         | 1         |
| Sin3a            | 0.340993  | 0.14945   | 0             | 1         | 1         |
| Man2c1_j5        | 1.20795   | 0.875682  | 0             | 1         | 1         |
| Man2c1_j9        | 10.4656   | 11.3305   | 0             | 1         | 1         |
| Gm6166           | 108.304   | 147.783   | 0.448395      | 9.46E-07  | 3.95E-05  |
| Cox5a_j1         | 110.471   | 110.793   | 0             | 1         | 1         |
| Cox5a_j2         | 0.480663  | 0.160387  | 0             | 1         | 1         |
| 2310046O06Rik_j1 | 3.5453    | 3.74253   | 0             | 1         | 1         |
| Scamp2           | 8.81893   | 9.5662    | 0.117344      | 0.331528  | 0.673024  |
| Ulk3             | 4.36397   | 4.21985   | -0.0484512    | 0.728195  | 0.903669  |
| Ulk3_j3          | 0.504007  | 0.539547  | 0.0983062     | 0.798289  | 0.933029  |
| Ulk3_j4          | 1.42455   | 1.39827   | -0.0268581    | 0.937299  | 0.980746  |
| Ubl7             | 1.99723   | 2.87636   | 0.526245      | 0.0909964 | 0.370936  |
| Ubl7_j1          | 0.0511901 | 0         | -1.79769e+308 | 0.128227  | 1         |
| Ubl7_j2          | 3.55211   | 4.06441   | 0.194369      | 0.419995  | 0.736529  |
| Ubl7_j4          | 1.72666   | 0.988171  | -0.805153     | 0.0639588 | 0.30009   |

|               |           |           |               |           |           |
|---------------|-----------|-----------|---------------|-----------|-----------|
| Sema7a_j1     | 27.0908   | 14.9425   | -0.858385     | 0         | 0         |
| 1600029O15Rik | 0.0919362 | 0.102929  | 0.162945      | 0.848985  | 1         |
| Stoml1        | 52.3588   | 56.3701   | 0.106496      | 0.24039   | 0.587785  |
| 6030419C18Rik | 45.3033   | 37.4802   | -0.273486     | 0.0020348 | 0.0253133 |
| Nptn_j1       | 18.0099   | 2.82852   | 0             | 1         | 1         |
| Nptn_j4       | 98.6325   | 73.7408   | 0             | 1         | 1         |
| Nptn_j3       | 26.3844   | 31.4742   | 0             | 1         | 1         |
| Hcn4          | 1.39948   | 1.29425   | 0             | 1         | 1         |
| Adpgk         | 1.35378   | 0.283925  | -2.25341      | 5.19E-06  | 0.0001748 |
| Adpgk         | 4.72538   | 5.99746   | 0.343923      | 0.0194391 | 0.138224  |
| Hexa          | 15.0462   | 15.5648   | 0             | 1         | 1         |
| Hexa_j3       | 14.0408   | 18.7055   | 0             | 1         | 1         |
| Celf6         | 15.7281   | 15.3081   | -0.0390473    | 0.711069  | 0.894971  |
| Parp6         | 15.5631   | 15.6437   | 0             | 1         | 1         |
| Parp6_j1      | 12.0707   | 15.887    | 0             | 1         | 1         |
| Pkm2_j7       | 67.7207   | 64.8232   | 0             | 1         | 1         |
| Pkm2_j8       | 373.887   | 390.211   | 0             | 1         | 1         |
| Gramd2_j1     | 1.3195    | 1.03183   | 0             | 1         | 1         |
| Myo9a_j1      | 0.815107  | 0.886752  | 0             | 1         | 1         |
| Larp6         | 5.22869   | 4.71103   | -0.150407     | 0.309979  | 0.654546  |
| Uaca          | 2.25716   | 2.10414   | 0             | 1         | 1         |
| Uaca_j4       | 3.33567   | 2.56381   | 0             | 1         | 1         |
| Uaca_j5       | 0.0660512 | 0         | 0             | 1         | 1         |
| Uaca_j12      | 0.155848  | 0.166877  | 0             | 1         | 1         |
| Tle3_j6       | 1.71266   | 1.86248   | 0             | 1         | 1         |
| Tle3_j9       | 0.929313  | 0.853577  | 0             | 1         | 1         |
| Tle3_j10      | 0.40591   | 0.392376  | 0             | 1         | 1         |
| XLOC_034355   | 0.206266  | 4.19E-06  | -15.586       | 0.995357  | 0.998726  |
| Anp32a        | 7.45091   | 8.07364   | 0             | 1         | 1         |
| Anp32a_j3     | 4.4957    | 5.64626   | 0             | 1         | 1         |
| Itga11        | 0.326873  | 0.292089  | -0.16232      | 0.610526  | 0.846532  |
| Cln6          | 9.81402   | 8.49665   | -0.20795      | 0.10261   | 0.396864  |
| Calml4        | 7.62533   | 7.35754   | -0.0515774    | 0.752888  | 0.914617  |
| Aagab_j1      | 1.58772   | 0.909036  | -0.804544     | 0.0001764 | 0.0034626 |
| Rpl4          | 37.6448   | 36.0263   | 0             | 1         | 1         |
| Snopc5        | 21.8897   | 19.0579   | -0.199864     | 0.118259  | 0.428203  |
| Tipin_j1      | 0.672676  | 0.855221  | 0             | 1         | 1         |
| Tipin         | 1.18855   | 0.838997  | 0             | 1         | 1         |
| Dennd4a_j3    | 6.14347   | 6.28951   | 0             | 1         | 1         |
| 2010321M09Rik | 0.538364  | 0.47154   | 0             | 1         | 1         |
| Dpp8          | 9.74133   | 7.35394   | 0             | 1         | 1         |
| Dpp8_j1       | 28.1482   | 27.2938   | 0             | 1         | 1         |
| Igdcc4        | 0.825261  | 0.280312  | 0             | 1         | 1         |
| Igdcc4        | 0.583932  | 0.162623  | 0             | 1         | 1         |
| Igdcc4_j7     | 1.70616   | 1.36793   | 0             | 1         | 1         |
| Igdcc3_j4     | 0.214114  | 0         | -1.79769e+308 | 0.0037841 | 0.0412514 |
| Igdcc3_j5     | 0.0894558 | 0.0426044 | -1.07017      | 0.331352  | 1         |



|             |           |            |            |           |           |
|-------------|-----------|------------|------------|-----------|-----------|
| Parp16_j1   | 0.278411  | 0.00223993 | -6.95762   | 0.288988  | 0.63673   |
| Parp16      | 1.03487   | 1.73131    | 0.742414   | 0.0016022 | 0.0208645 |
| Cilp        | 0.527616  | 0.190198   | -1.47198   | 0.00031   | 0.0054898 |
| Clpx        | 6.86392   | 4.89647    | 0          | 1         | 1         |
| Clpx        | 4.1199    | 6.08074    | 0          | 1         | 1         |
| Pdcd7       | 6.29736   | 5.61405    | -0.165706  | 0.232331  | 0.57939   |
| Gm514_j1    | 0.346705  | 0.383446   | 0.145314   | 0.656907  | 0.869093  |
| Gm514_j6    | 0.258459  | 0.29348    | 0.183326   | 0.699017  | 0.889085  |
| Gm514_j7    | 0.308183  | 0.323379   | 0.0694373  | 0.880537  | 0.961981  |
| Rasl12      | 0.962736  | 1.24765    | 0.374004   | 0.148401  | 0.477304  |
| Rasl12_j2   | 0.449161  | 0.276732   | -0.698746  | 0.210372  | 0.554929  |
| Mtfmt       | 0.257261  | 0.180023   | -0.515053  | 0.177515  | 0.516863  |
| Oaz2-ps_j1  | 87.8622   | 97.1652    | 0.145198   | 0.0939502 | 0.377669  |
| Csnk1g1_j1  | 0.505374  | 0.372096   | -0.441676  | 0.146703  | 0.475075  |
| Csnk1g1_j11 | 4.3046    | 4.25015    | -0.018367  | 0.88225   | 0.962629  |
| Ppib        | 93.6216   | 103.302    | 0          | 1         | 1         |
| Dapk2       | 3.14968   | 2.5541     | -0.302394  | 0.0378255 | 0.215882  |
| Herc1_j3    | 2.19318   | 1.83286    | 0          | 1         | 1         |
| Herc1_j9    | 20.185    | 19.443     | 0          | 1         | 1         |
| Car12       | 0.164049  | 0.198532   | 0.275247   | 0.548031  | 0.813978  |
| Car12_j1    | 0.13544   | 0.0879838  | -0.622342  | 0.416979  | 1         |
| Rps27l      | 10.4483   | 11.6345    | 0.155145   | 0.402215  | 0.725446  |
| Vps13c_j2   | 0.362627  | 0.15714    | -1.20644   | 0.0001325 | 0.0027158 |
| Vps13c_j5   | 1.60118   | 1.88686    | 0.236854   | 0.0630492 | 0.297504  |
| Rora        | 1.436     | 1.14815    | -0.322747  | 0.0234256 | 0.156951  |
| Narg2_j3    | 0.224705  | 0.0593079  | -1.92173   | 0.0229401 | 0.154827  |
| Narg2       | 0.345969  | 6.76E-05   | -12.3212   | 0.879847  | 0.961539  |
| Narg2_j2    | 0.18792   | 0.149487   | -0.330097  | 0.581074  | 0.832041  |
| Anxa2       | 515.772   | 617.402    | 0          | 1         | 1         |
| Anxa2_j1    | 168.124   | 278.793    | 0          | 1         | 1         |
| Bnip2       | 2.71523   | 2.73225    | 0.00901719 | 0.949267  | 0.985343  |
| Bnip2_j3    | 1.15991   | 1.09895    | -0.0778963 | 0.786292  | 0.92855   |
| Gtf2a2      | 2.0408    | 1.58495    | -0.364702  | 0.27028   | 0.619522  |
| Myo1e       | 22.2595   | 17.4492    | -0.351262  | 0.0001325 | 0.0027158 |
| Myo1e_j1    | 1.62843   | 0.49093    | -1.72989   | 1.17E-07  | 6.15E-06  |
| Sltm        | 1.47142   | 1.33708    | 0          | 1         | 1         |
| Sltm_j3     | 0.847777  | 0.897515   | 0          | 1         | 1         |
| Sltm_j4     | 7.16542   | 7.52876    | 0          | 1         | 1         |
| Adam10      | 1.43663   | 1.39494    | 0          | 1         | 1         |
| Gm3436      | 15.1002   | 15.3917    | 0.0275925  | 0.800049  | 0.933295  |
| Zfp280d     | 0.467903  | 0.349572   | -0.420618  | 0.325993  | 0.669299  |
| Zfp280d     | 2.26939   | 2.43966    | 0.104376   | 0.531888  | 0.80382   |
| Mns1_j1     | 0.440987  | 0.459387   | 0.0589761  | 0.857263  | 0.954789  |
| Rfx7_j1     | 0.164522  | 0.231639   | 0.4936     | 0.184784  | 0.525127  |
| Rfx7        | 0.226798  | 0.228144   | 0.00853338 | 0.981298  | 0.994152  |
| Nedd4_j3    | 0.0581039 | 0          | 0          | 1         | 1         |
| Nedd4_j1    | 0.0636851 | 0.0361444  | 0          | 1         | 1         |

|             |           |                 |            |           |           |
|-------------|-----------|-----------------|------------|-----------|-----------|
| Nedd4_j6    | 4.67821   | 1.65175         | 0          | 1         | 1         |
| Pygo1       | 1.17129   | 0.710574        | -0.721045  | 6.42E-05  | 0.0014759 |
| Dyx1c1      | 0.162263  | 0.108029        | -0.586916  | 0.482059  | 0.775384  |
| Ccpg1_j4    | 5.97609   | 6.18035         | 0          | 1         | 1         |
| Rab27a      | 2.56144   | 2.28227         | 0          | 1         | 1         |
| Rab27a_j3   | 0.461385  | 0.077317        | 0          | 1         | 1         |
| Rsl24d1_j2  | 0.0958391 | 0.117966        | 0.299681   | 0.779565  | 1         |
| Wdr72_j1    | 1.23329   | 0.511196        | -1.27056   | 1.39E-05  | 0.0004098 |
| Onecut1     | 4.45138   | 1.43447         | 0          | 1         | 1         |
| Onecut1     | 0.986749  | 0.471326        | -1.06596   | 5.77E-06  | 0.0001915 |
| BC031353_j2 | 0.573121  | 0.343306        | 0          | 1         | 1         |
| BC031353_j3 | 0.303586  | 0.028827        | 0          | 1         | 1         |
| Arpp19      | 0.541879  | 0.499513        | 0          | 1         | 1         |
| Myo5a_j1    | 21.1372   | 18.5631         | 0          | 1         | 1         |
| Myo5a_j3    | 10.0042   | 9.76303         | 0          | 1         | 1         |
| Gnb5        | 0.867902  | 0 -1.79769e+308 |            | 1.79E-10  | 1.72E-08  |
| Gnb5        | 38.2043   | 36.3612         | -0.0713382 | 0.450375  | 0.756119  |
| Leo1        | 2.19827   | 2.39795         | 0.125429   | 0.529156  | 0.802396  |
| XLOC_034422 | 0.106908  | 0.385016        | 1.84855    | 0.0040289 | 0.0431197 |
| Lysmd2      | 9.41582   | 7.79236         | 0          | 1         | 1         |
| Bmp5        | 0.784419  | 0.747946        | -0.068691  | 0.785445  | 0.928169  |
| Hmgcl1_j1   | 0.17596   | 0.206789        | 0          | 1         | 1         |
| Hmgcl1      | 1.87353   | 1.60583         | 0          | 1         | 1         |
| Gclc        | 9.66407   | 7.31828         | 0          | 1         | 1         |
| Elovl5      | 76.3754   | 65.9922         | -0.210812  | 0.0151139 | 0.115491  |
| Elovl5_j5   | 2.88022   | 7.44458         | 1.37001    | 1.31E-14  | 2.46E-12  |
| Ick         | 2.64959   | 2.62931         | 0          | 1         | 1         |
| AK050586_j5 | 0.374238  | 0.312726        | -0.259055  | 0.676456  | 0.878288  |
| AK050586_j8 | 0.314007  | 0.10502         | -1.58013   | 0.0684926 | 0.313436  |
| Gsta4       | 9.13908   | 8.36122         | -0.128336  | 0.405277  | 0.726998  |
| Gsta4_j1    | 4.52905   | 3.26736         | -0.471082  | 0.200244  | 0.543512  |
| Mto1        | 3.80981   | 3.5542          | -0.100195  | 0.542845  | 0.810532  |
| Cd109_j1    | 0.298555  | 0.142675        | 0          | 1         | 1         |
| Cd109       | 0.894963  | 1.20727         | 0          | 1         | 1         |
| Senp6_j8    | 3.05736   | 3.38412         | 0          | 1         | 1         |
| Myo6_j4     | 0.287363  | 0.330701        | 0.202651   | 0.527394  | 0.801552  |
| Myo6_j1     | 0.0533148 | 0 -1.79769e+308 |            | 0.0004412 | 1         |
| Myo6_j11    | 0.243753  | 0.424305        | 0.799682   | 0.046207  | 0.246429  |
| XLOC_034442 | 0.282076  | 0.164029        | -0.78213   | 0.0633401 | 0.298501  |
| AK082555    | 0.605614  | 0.926942        | 0          | 1         | 1         |
| AK052495    | 0.544744  | 0.907552        | 0          | 1         | 1         |
| AK052495_j1 | 0.443529  | 0.382906        | 0          | 1         | 1         |
| Mei4_j2     | 0.0880578 | 5.86E-06        | -13.8757   | 0.99678   | 1         |
| Irak1bp1    | 1.99582   | 1.86223         | -0.0999558 | 0.649643  | 0.865404  |
| Irak1bp1_j1 | 0.749808  | 0 -1.79769e+308 |            | 2.32E-07  | 1.13E-05  |
| Sh3bgrl2    | 9.38979   | 7.39144         | -0.345237  | 0.0008445 | 0.0125117 |
| Bckdhb      | 7.53881   | 5.82194         | 0          | 1         | 1         |

|             |             |                 |            |           |           |
|-------------|-------------|-----------------|------------|-----------|-----------|
| Dopey1_j2   | 3.00136     | 2.9184          | 0          | 1         | 1         |
| Dopey1_j1   | 1.22118     | 0.744215        | 0          | 1         | 1         |
| Rwdd2a      | 1.43372     | 0.936375        | -0.614609  | 0.0430898 | 0.235421  |
| Rwdd2a      | 0.645411    | 0.625339        | -0.0455785 | 0.910007  | 0.971581  |
| Prss35_j1   | 12.5387     | 12.3686         | -0.0197102 | 0.860263  | 0.955778  |
| Cyb5r4_j7   | 0.737126    | 0.34276         | -1.10471   | 0.148485  | 0.477336  |
| XLOC_034460 | 0.0602396   | 0.0605534       | 0.00749472 | 0.995887  | 1         |
| Mrap2       | 0.672691    | 0.391336        | -0.781538  | 0.0943445 | 0.378567  |
| Mrap2       | 0.643233    | 0.180802        | -1.83093   | 0.0036205 | 0.0400049 |
| XLOC_034461 | 0.132427    | 0.0721119       | -0.876891  | 0.319003  | 1         |
| Nt5e        | 5.87161     | 4.59504         | -0.353678  | 0.0087704 | 0.0777037 |
| Zfp949      | 1.84022     | 1.55057         | 0          | 1         | 1         |
| Bcl2a1b     | 0.841211    | 1.80727         | 1.10327    | 0.0004989 | 0.0081286 |
| Mthfs       | 1.4505      | 1.83895         | 0.342328   | 0.339984  | 0.680094  |
| Mthfs_j2    | 0.0958093   | 0 -1.79769e+308 |            | 0.106686  | 1         |
| Rasgrf1_j4  | 1.19346     | 0.843613        | 0          | 1         | 1         |
| Rasgrf1_j3  | 1.39224     | 0.918965        | 0          | 1         | 1         |
| Ctsh        | 1.30703     | 2.16949         | 0.731065   | 0.0043735 | 0.0459107 |
| Adamts7_j2  | 0.302234    | 0.178937        | -0.756212  | 0.0748256 | 0.330017  |
| Plscr2      | 3.00592     | 2.91059         | -0.0464964 | 0.820969  | 0.942071  |
| Plscr4      | 2.28808     | 2.40709         | 0.0731557  | 0.69148   | 0.885712  |
| Plod2       | 0.236705    | 0.169817        | -0.479114  | 0.195861  | 0.538405  |
| Slc9a9_j1   | 29.1799     | 26.2139         | 0          | 1         | 1         |
| Slc9a9_j2   | 21.19       | 17.1084         | 0          | 1         | 1         |
| Pcolce2_j1  | 0.744288    | 0.647693        | -0.20055   | 0.328505  | 0.671065  |
| Atr_j1      | 0.579111    | 0.420428        | -0.461981  | 0.0869506 | 0.360474  |
| Xrn1_j6     | 0.22387     | 0               | 0          | 1         | 1         |
| Gk5_j1      | 0.0725111   | 0 -1.79769e+308 |            | 0.0001342 | 1         |
| Gk5_j6      | 0.264735    | 0.254201        | -0.0585799 | 0.873295  | 0.959842  |
| Tfdp2_j10   | 0.000713474 | 0.324692        | 0          | 1         | 1         |
| Tfdp2_j11   | 0.704177    | 0.445383        | 0          | 1         | 1         |
| AK089981_j3 | 0.220204    | 0.43948         | 0.996953   | 0.0225973 | 0.153384  |
| Gm10123     | 1585.08     | 1751.97         | 0.144426   | 0.132308  | 0.452583  |
| Rbp1        | 6.70206     | 7.72175         | 0.204324   | 0.236911  | 0.583799  |
| Copb2       | 0.700291    | 0.773349        | 0.143165   | 0.634829  | 0.858251  |
| Faim        | 13.2327     | 13.7351         | 0.0537519  | 0.697193  | 0.888506  |
| Faim        | 1.87865     | 2.28018         | 0.279451   | 0.407651  | 0.728185  |
| Cep70       | 1.11745     | 1.31314         | 0.232816   | 0.390907  | 0.717624  |
| Cep70_j2    | 0.534785    | 0.450658        | -0.246927  | 0.546524  | 0.813004  |
| Cep70_j1    | 1.0951      | 0.817075        | -0.422528  | 0.156152  | 0.489534  |
| Dbr1        | 1.68627     | 1.54293         | -0.128163  | 0.547707  | 0.813819  |
| Dzip1l_j2   | 0.114374    | 0.0989762       | -0.208607  | 0.742554  | 1         |
| Dzip1l_j12  | 0.290071    | 0.17233         | -0.751236  | 0.224842  | 0.572013  |
| Stag1_j1    | 0.434527    | 0.412024        | 0          | 1         | 1         |
| Stag1_j2    | 1.36433     | 1.14861         | 0          | 1         | 1         |
| Stag1_j4    | 1.25656     | 1.99125         | 0          | 1         | 1         |
| Msl2        | 2.38778     | 2.34691         | 0          | 1         | 1         |

|               |           |           |               |           |          |
|---------------|-----------|-----------|---------------|-----------|----------|
| Ky            | 0.0910351 | 0.0547806 | -0.732758     | 0.348657  | 1        |
| Anapc13       | 1.36027   | 1.39685   | 0             | 1         | 1        |
| Amotl2        | 1.64517   | 1.94755   | 0             | 1         | 1        |
| Amotl2_j1     | 1.19774   | 1.63338   | 0             | 1         | 1        |
| Ryk           | 1.20766   | 1.22167   | 0             | 1         | 1        |
| Ryk           | 2.71805   | 2.74266   | 0             | 1         | 1        |
| Slco2a1_j4    | 0.122831  | 0.0411531 | -1.5776       | 0.128689  | 1        |
| XLOC_034514   | 0.225488  | 0.165292  | 0             | 1         | 1        |
| Rab6b         | 97.8847   | 74.7834   | 0             | 1         | 1        |
| Rab6b_j2      | 0.223105  | 0         | 0             | 1         | 1        |
| Topbp1        | 2.59768   | 2.9842    | 0.200122      | 0.144642  | 0.471991 |
| Topbp1_j2     | 2.75531   | 3.00893   | 0.127039      | 0.652984  | 0.867224 |
| Nphp3_j1      | 0.398901  | 0.396867  | -0.00737397   | 0.980014  | 0.994006 |
| Nphp3_j2      | 0.38123   | 0.301698  | -0.337559     | 0.307532  | 0.652546 |
| Nphp3_j8      | 0.357208  | 0.293817  | -0.281845     | 0.560976  | 0.82146  |
| Acad11        | 2.26911   | 2.02909   | -0.161296     | 0.222531  | 0.56956  |
| Cpne4_j3      | 1.70635   | 0.97994   | 0             | 1         | 1        |
| Cpne4_j4      | 0.617452  | 0         | 0             | 1         | 1        |
| Mrpl3         | 16.4563   | 14.6492   | -0.167815     | 0.189817  | 0.531646 |
| Pik3r4_j1     | 5.81606   | 5.44603   | 0             | 1         | 1        |
| Pik3r4        | 5.03382   | 4.01706   | 0             | 1         | 1        |
| Wdr82         | 7.41624   | 7.61039   | 0             | 1         | 1        |
| Twf2          | 13.8368   | 20.6949   | 0.580765      | 1.69E-07  | 8.51E-06 |
| Poc1a         | 0.406595  | 0.297171  | -0.452301     | 0.364979  | 0.698835 |
| Dusp7         | 6.17016   | 7.36008   | 0.254412      | 0.0330913 | 0.198267 |
| Rpl29_j2      | 1.37534   | 1.30437   | -0.0764332    | 0.882153  | 0.962591 |
| Pcbp4_j4      | 0.814939  | 0.782335  | 0             | 1         | 1        |
| Rrp9          | 5.08863   | 5.23044   | 0.0396529     | 0.802246  | 0.934265 |
| Rrp9_j2       | 2.16815   | 3.09839   | 0.515054      | 0.0923932 | 0.37398  |
| Vprbp_j2      | 2.48162   | 2.29147   | 0             | 1         | 1        |
| Cish          | 5.49175   | 6.76203   | 0.30019       | 0.0279675 | 0.177379 |
| 6430571L13Rik | 5.23826   | 2.87713   | -0.864455     | 1.26E-08  | 8.65E-07 |
| Cacna2d2      | 1.09693   | 0.961372  | 0             | 1         | 1        |
| Cacna2d2_j7   | 0.826072  | 2.30504   | 0             | 1         | 1        |
| Tmem115       | 12.7003   | 13.3508   | 0.0720712     | 0.495954  | 0.783002 |
| Nprl2         | 11.597    | 11.9796   | 0.0468242     | 0.736349  | 0.907153 |
| Rassf1_j1     | 2.07694   | 2.26575   | 0.125527      | 0.662328  | 0.871966 |
| Rassf1        | 4.57191   | 5.54688   | 0.278881      | 0.0984211 | 0.387897 |
| Tusc2         | 59.8745   | 57.6805   | -0.0538576    | 0.54379   | 0.811058 |
| Hyal2         | 1.41208   | 1.60222   | 0.182256      | 0.475438  | 0.77138  |
| Ifrd2_j1      | 0.560897  | 0.522454  | -0.102429     | 0.809896  | 0.937853 |
| Ifrd2         | 0.830417  | 1.14151   | 0.459037      | 0.11306   | 0.418521 |
| Mon1a         | 12.3529   | 13.1867   | 0.0942301     | 0.403895  | 0.72656  |
| Mst1r_j1      | 0.280526  | 0.105517  | -1.41066      | 0.030697  | 0.188606 |
| Mst1r_j3      | 0.448042  | 0.319081  | -0.489713     | 0.175818  | 0.514341 |
| Mst1r_j2      | 0.0501395 | 0         | -1.79769e+308 | 0.0133422 | 1        |
| Mst1r_j9      | 1.2757    | 1.36244   | 0.0948993     | 0.779572  | 0.925607 |

|               |           |                 |            |           |           |
|---------------|-----------|-----------------|------------|-----------|-----------|
| Traip         | 0.329996  | 0.143629        | -1.2001    | 0.0443916 | 0.240351  |
| Uba7_j4       | 0.400612  | 0.751503        | 0.907573   | 0.0092109 | 0.0806249 |
| Uba7_j3       | 0.0619625 | 0 -1.79769e+308 |            | 0.0091544 | 1         |
| Ip6k1_j1      | 0.160821  | 0.121975        | -0.398873  | 0.406783  | 0.727764  |
| Ip6k1         | 27.634    | 24.1821         | 0          | 1         | 1         |
| Gmppb         | 1.39624   | 1.16694         | 0          | 1         | 1         |
| Gmppb_j3      | 0.12964   | 0.241848        | 0          | 1         | 1         |
| Amt_j1        | 9.94726   | 10.9316         | 0          | 1         | 1         |
| Rhoa          | 29.1069   | 34.9203         | 0          | 1         | 1         |
| Gpx1          | 39.1932   | 42.7936         | 0.126791   | 0.190064  | 0.531884  |
| Usp4_j1       | 5.73572   | 4.89615         | -0.228327  | 0.160636  | 0.495357  |
| Usp4_j2       | 7.88764   | 8.75362         | 0.150286   | 0.146191  | 0.474483  |
| Ccdc71        | 5.45745   | 6.19429         | 0          | 1         | 1         |
| Lamb2_j7      | 0.606183  | 0.000566376     | 0          | 1         | 1         |
| Lamb2_j8      | 5.27738   | 7.17214         | 0          | 1         | 1         |
| Usp19_j6      | 0.168155  | 0.153193        | 0          | 1         | 1         |
| Qars_j4       | 8.87626   | 9.6568          | 0          | 1         | 1         |
| Qrich1_j3     | 13.2428   | 12.6249         | 0          | 1         | 1         |
| Impdh2_j2     | 0.0148918 | 0.0587873       | 0          | 1         | 1         |
| Slc25a20      | 11.212    | 13.1923         | 0.234659   | 0.0428487 | 0.234446  |
| Prkar2a       | 21.9018   | 17.9624         | 0          | 1         | 1         |
| Ip6k2_j2      | 16.1107   | 17.114          | 0          | 1         | 1         |
| Nckipsd       | 15.6351   | 16.0289         | 0.0358886  | 0.729339  | 0.904065  |
| Nckipsd_j5    | 8.16238   | 8.67319         | 0.0875728  | 0.622437  | 0.852322  |
| Celsr3_j3     | 0.761291  | 0.540822        | 0          | 1         | 1         |
| Celsr3_j15    | 1.56489   | 1.29345         | 0          | 1         | 1         |
| Slc26a6_j8    | 0.456313  | 0.314901        | -0.535125  | 0.314109  | 0.658333  |
| Uqcrc1        | 56.1827   | 53.6716         | 0          | 1         | 1         |
| Uqcrc1_j1     | 90.0292   | 98.4117         | 0          | 1         | 1         |
| Col7a1_j2     | 0.228085  | 0.0903644       | -1.33574   | 0.0060406 | 0.0588586 |
| Col7a1_j10    | 0.891439  | 2.0086          | 1.17198    | 0.0062669 | 0.0606156 |
| Pfkfb4        | 5.09757   | 7.2457          | 0.507315   | 8.11E-06  | 0.0002576 |
| Shisa5        | 6.15936   | 7.2911          | 0.243357   | 0.2303    | 0.577332  |
| Shisa5        | 0.371379  | 0.465397        | 0.32557    | 0.167582  | 0.504088  |
| Shisa5        | 0.610299  | 0.597787        | -0.0298845 | 0.884921  | 0.963475  |
| Ccdc51        | 0.368367  | 0.43427         | 0          | 1         | 1         |
| Nme6          | 0.266192  | 0.397817        | 0.579639   | 0.118533  | 0.428543  |
| Nme6_j3       | 0.210695  | 0.206599        | -0.028328  | 0.977798  | 0.993579  |
| Cdc25a_j1     | 0.307209  | 0.180117        | 0          | 1         | 1         |
| Cdc25a        | 1.64403   | 1.37506         | 0          | 1         | 1         |
| Mtap4         | 41.9858   | 38.5723         | 0          | 1         | 1         |
| Mtap4_j5      | 17.3092   | 19.0949         | 0          | 1         | 1         |
| Cspg5         | 3.07421   | 2.79038         | -0.139757  | 0.446715  | 0.753504  |
| 2610002I17Rik | 4.80212   | 5.43337         | 0.178175   | 0.224328  | 0.571479  |
| Scap_j1       | 1.11924   | 0.646199        | 0          | 1         | 1         |
| Ngp           | 1.65779   | 0.775158        | -1.0967    | 0.0002663 | 0.0048534 |
| Kif9_j8       | 8.93E-05  | 0.139504        | 10.6101    | 0.870957  | 1         |

|               |           |            |               |           |           |
|---------------|-----------|------------|---------------|-----------|-----------|
| Kif9_j9       | 0.158577  | 0          | -1.79769e+308 | 0.0001762 | 0.0034613 |
| Setd2         | 3.94278   | 3.97753    | 0.0126606     | 0.908619  | 0.971192  |
| Ccdc12_j4     | 2.568     | 4.72433    | 0.879465      | 0.0073596 | 0.0683622 |
| Als2cl_j2     | 0.0672502 | 0.0539661  | -0.317486     | 0.680543  | 1         |
| Als2cl_j1     | 0.0691663 | 0.00705325 | -3.29371      | 0.0724257 | 1         |
| Als2cl_j10    | 0.0635146 | 0.0225315  | -1.49514      | 0.246023  | 1         |
| Lrrfip2_j2    | 1.74546   | 1.73646    | 0             | 1         | 1         |
| Lrrfip2_j1    | 8.57388   | 8.88973    | 0             | 1         | 1         |
| Epm2aip1      | 23.873    | 21.4129    | -0.156903     | 0.0708455 | 0.319947  |
| Trank1_j1     | 0.0722257 | 0.0386984  | -0.90024      | 0.24321   | 1         |
| Dclk3         | 8.96641   | 8.71381    | -0.0412262    | 0.709248  | 0.894136  |
| Dclk3_j1      | 3.91304   | 2.07909    | -0.912338     | 0.0013372 | 0.0180544 |
| 2900079G21Rik | 3.65699   | 3.00835    | -0.281684     | 0.149143  | 0.478226  |
| Clasp2_j8     | 31.2451   | 32.2733    | 0             | 1         | 1         |
| Ubp1_j1       | 11.6532   | 12.9415    | 0             | 1         | 1         |
| Glb1          | 4.8069    | 3.85422    | -0.318666     | 0.0634705 | 0.298841  |
| XLOC_034595   | 0.249205  | 0.162913   | -0.613232     | 0.122418  | 0.43555   |
| Dync1li1      | 30.0148   | 27.88      | -0.106445     | 0.263281  | 0.612179  |
| Cmtm6         | 7.158     | 6.0047     | 0             | 1         | 1         |
| Osbpl10_j1    | 0.26169   | 0.136227   | 0             | 1         | 1         |
| Osbpl10_j4    | 4.48122   | 0.00335086 | 0             | 1         | 1         |
| Osbpl10_j8    | 0.730186  | 0          | 0             | 1         | 1         |
| XLOC_034599   | 0.134917  | 0.0132494  | -3.34807      | 0.222081  | 1         |
| XLOC_034601   | 0.129257  | 0.179416   | 0             | 1         | 1         |
| XLOC_034601   | 0.165246  | 0.0355208  | 0             | 1         | 1         |
| XLOC_034603   | 0.137123  | 0          | 0             | 1         | 1         |
| Azi2          | 2.87313   | 2.89123    | 0             | 1         | 1         |
| XLOC_034607   | 0.109823  | 0.104996   | -0.0648546    | 0.935719  | 1         |
| Golga4_j2     | 0.104299  | 0.12747    | 0.289425      | 0.565921  | 1         |
| Golga4_j1     | 0.185938  | 0          | -1.79769e+308 | 2.22E-10  | 2.08E-08  |
| Itga9         | 0.297824  | 0.310276   | 0.0590934     | 0.847547  | 0.951788  |
| Ctdspl        | 1.96054   | 1.71964    | 0             | 1         | 1         |
| Ctdspl        | 0.841275  | 0.685766   | 0             | 1         | 1         |
| Vill_j10      | 0.0292639 | 0.0568673  | 0.958475      | 0.532871  | 1         |
| Acaa1a_j3     | 6.14276   | 7.86411    | 0             | 1         | 1         |
| Acaa1a_j5     | 0.113059  | 0.526247   | 0             | 1         | 1         |
| Xylb          | 0.358616  | 0.315026   | -0.186971     | 0.657552  | 0.869529  |
| Acvr2b_j3     | 0.0953903 | 0.0447421  | -1.09221      | 0.355389  | 1         |
| Exog          | 0.533712  | 0.547793   | 0             | 1         | 1         |
| Exog          | 1.45663   | 1.57624    | 0             | 1         | 1         |
| Wdr48         | 2.29168   | 2.28113    | 0             | 1         | 1         |
| Wdr48_j2      | 0.278621  | 0.232376   | 0             | 1         | 1         |
| Ttc21a_j1     | 0.195591  | 0.111305   | -0.813317     | 0.302122  | 0.648272  |
| Ttc21a_j2     | 0.0767843 | 0.0646477  | -0.248212     | 0.830314  | 1         |
| Slc25a38      | 22.8098   | 26.677     | 0.225943      | 0.0206173 | 0.143907  |
| Rpsa_j1       | 0.450004  | 0.305754   | 0             | 1         | 1         |
| Rpsa_j4       | 0.188311  | 0.107445   | 0             | 1         | 1         |

|                  |           |                 |             |           |          |
|------------------|-----------|-----------------|-------------|-----------|----------|
| Myrip            | 0.920735  | 0.346155        | 0           | 1         | 1        |
| Eif1b            | 6.04618   | 6.85499         | 0.181131    | 0.312835  | 0.657266 |
| Eif1b_j3         | 6.25312   | 8.81958         | 0.496134    | 0.0997455 | 0.390957 |
| Entpd3           | 25.9276   | 17.4676         | 0           | 1         | 1        |
| Entpd3_j1        | 17.4092   | 15.7521         | 0           | 1         | 1        |
| Rpl14_j5         | 0.37811   | 0.370871        | 0           | 1         | 1        |
| Ctnnb1           | 65.4345   | 58.3126         | 0           | 1         | 1        |
| XLOC_034632      | 0.112509  | 0.168975        | 0.586771    | 0.584576  | 0.833464 |
| Trak1_j2         | 10.6024   | 8.95057         | 0           | 1         | 1        |
| Trak1_j9         | 1.9402    | 2.01545         | 0           | 1         | 1        |
| Trak1_j11        | 0.205246  | 0.110014        | 0           | 1         | 1        |
| Trak1_j10        | 0.143018  | 0.0364049       | 0           | 1         | 1        |
| XLOC_034635      | 0.274672  | 0.273832        | -0.00441986 | 0.992087  | 0.997582 |
| Deb1_j2          | 8.33094   | 8.49015         | 0.0273106   | 0.89325   | 0.966313 |
| Deb1_j1          | 13.5522   | 14.8672         | 0.133602    | 0.48334   | 0.775959 |
| Nktr_j2          | 0.0565939 | 0 -1.79769e+308 |             | 1.62E-05  | 1        |
| Nktr_j1          | 0.195713  | 0.178262        | -0.134739   | 0.685881  | 0.882922 |
| Kbtbd5           | 0.150158  | 0.170907        | 0.186733    | 0.714766  | 0.896683 |
| 1700048O20Rik_j1 | 0.380838  | 0.507841        | 0.4152      | 0.553368  | 0.817173 |
| 1700048O20Rik    | 0.440098  | 0.740813        | 0.751285    | 0.0511808 | 0.262111 |
| 1700048O20Rik_j2 | 0.133244  | 1.88E-05        | -12.7949    | 0.985095  | 1        |
| Snrk             | 1.91041   | 1.2942          | 0           | 1         | 1        |
| Snrk             | 4.71053   | 3.45858         | 0           | 1         | 1        |
| Snrk_j2          | 0.409324  | 1.67716         | 0           | 1         | 1        |
| Snrk_j6          | 5.25858   | 6.66069         | 0           | 1         | 1        |
| Abhd5_j1         | 0.628815  | 0.0655117       | 0           | 1         | 1        |
| XLOC_034643      | 1.14845   | 1.13473         | -0.0173398  | 0.948919  | 0.985323 |
| 9530059O14Rik_j3 | 2.07366   | 1.99733         | -0.054107   | 0.745697  | 0.911379 |
| D9Ertd402e       | 1.19838   | 1.14401         | 0           | 1         | 1        |
| D9Ertd402e_j2    | 0.395837  | 0.199434        | 0           | 1         | 1        |
| D9Ertd402e_j3    | 3.77916   | 3.43148         | 0           | 1         | 1        |
| Zfp105           | 1.83715   | 1.67881         | -0.130028   | 0.52933   | 0.802396 |
| Zfp105_j2        | 0.117218  | 0 -1.79769e+308 |             | 0.0058586 | 1        |
| Kif15_j5         | 0.0689434 | 0 -1.79769e+308 |             | 0.0334254 | 1        |
| Kif15_j7         | 0.0323129 | 0.0739643       | 1.19472     | 0.434255  | 1        |
| Lars2            | 185.97    | 234.446         | 0.334183    | 0.0003936 | 0.006689 |
| Limd1            | 2.76184   | 3.24501         | 0.232593    | 0.0574671 | 0.280902 |
| Sacm1l           | 52.8695   | 45.8344         | -0.206005   | 0.0173746 | 0.12774  |
| Ccr2_j1          | 0.335211  | 0.950423        | 0           | 1         | 1        |
| Ccr2             | 0.353989  | 0.64118         | 0           | 1         | 1        |
| Aasdhppt         | 0.452055  | 0.424985        | -0.0890863  | 0.684157  | 0.881956 |
| Gria4            | 2.52622   | 3.22759         | 0           | 1         | 1        |
| Gria4            | 6.5439    | 4.42695         | 0           | 1         | 1        |
| Dync2h1_j3       | 3.64086   | 3.21641         | -0.178828   | 0.440405  | 0.749633 |
| Dync2h1_j4       | 0.192145  | 0 -1.79769e+308 |             | 8.52E-15  | 1.62E-12 |
| Birc2_j3         | 3.85972   | 3.34433         | -0.206782   | 0.193006  | 0.535377 |
| Yap1_j1          | 2.70608   | 2.80509         | 0           | 1         | 1        |

|                  |           |                 |            |           |           |
|------------------|-----------|-----------------|------------|-----------|-----------|
| Yap1             | 1.23819   | 1.24415         | 0          | 1         | 1         |
| 9230110C19Rik_j1 | 0.999429  | 1.15293         | 0          | 1         | 1         |
| 9230110C19Rik    | 4.28211   | 3.68126         | 0          | 1         | 1         |
| AK129341         | 0.358354  | 0.373614        | 0          | 1         | 1         |
| AK129341_j6      | 0.19675   | 0.0735764       | 0          | 1         | 1         |
| AK054106_j1      | 0.243573  | 0.222646        | -0.129601  | 0.889012  | 0.964761  |
| Arhgap42_j4      | 1.24831   | 0.59917         | 0          | 1         | 1         |
| Arhgap42_j1      | 0.462759  | 0.561832        | 0          | 1         | 1         |
| Cntn5_j7         | 0.291476  | 0.147019        | -0.987372  | 0.292633  | 0.639621  |
| Cep57            | 1.53657   | 1.44651         | 0          | 1         | 1         |
| Endod1_j1        | 112.052   | 90.7426         | 0          | 1         | 1         |
| Endod1           | 33.0187   | 22.706          | 0          | 1         | 1         |
| Amotl1           | 4.44325   | 4.6484          | 0          | 1         | 1         |
| Fut4             | 0.577938  | 0.630812        | 0.126296   | 0.578204  | 0.830224  |
| Ankrd49_j1       | 1.32793   | 1.19724         | -0.149464  | 0.629683  | 0.85615   |
| Ankrd49          | 4.37509   | 4.67401         | 0.0953475  | 0.54697   | 0.813296  |
| Panx1_j1         | 14.4615   | 16.7188         | 0          | 1         | 1         |
| Panx1_j5         | 1.01169   | 0               | 0          | 1         | 1         |
| Panx1            | 6.39515   | 7.00498         | 0          | 1         | 1         |
| Med17            | 2.23486   | 2.13598         | 0          | 1         | 1         |
| 4931406C07Rik    | 6.44817   | 6.22327         | -0.0512167 | 0.686596  | 0.883287  |
| 5830418K08Rik_j6 | 0.701527  | 0.763773        | 0.122645   | 0.592789  | 0.8379    |
| Ccdc67_j1        | 0.129588  | 0.0495423       | -1.3872    | 0.181008  | 1         |
| Fat3_j3          | 0.171171  | 0.114464        | 0          | 1         | 1         |
| Fat3_j8          | 0.106901  | 0.0441851       | 0          | 1         | 1         |
| Fat3_j7          | 0.223989  | 0.0638114       | 0          | 1         | 1         |
| Zfp558_j7        | 0.0839098 | 0 -1.79769e+308 | 0.0024766  |           | 1         |
| Zfp558_j5        | 0.0893578 | 0 -1.79769e+308 | 0.0018903  |           | 1         |
| Zfp558_j6        | 0.0916161 | 0 -1.79769e+308 | 0.0016326  |           | 1         |
| Zfp560_j4        | 4.84581   | 5.23576         | 0.111661   | 0.531854  | 0.803818  |
| Zfp26_j3         | 0.286165  | 0.224239        | 0          | 1         | 1         |
| Zfp426_j7        | 0.858124  | 0.534983        | 0          | 1         | 1         |
| Zfp426_j5        | 2.53224   | 2.79924         | 0          | 1         | 1         |
| Olfm2_j1         | 2.14116   | 1.56222         | -0.454789  | 0.0039216 | 0.0422961 |
| Col5a3_j4        | 15.8118   | 35.6126         | 0          | 1         | 1         |
| Col5a3_j7        | 0.10427   | 0.291051        | 0          | 1         | 1         |
| Col5a3_j6        | 0.642793  | 0               | 0          | 1         | 1         |
| Col5a3_j5        | 1.9383    | 0               | 0          | 1         | 1         |
| Angptl6_j4       | 5.10017   | 5.35443         | 0.0701862  | 0.73174   | 0.905137  |
| Eif3g            | 58.5752   | 66.8362         | 0.19034    | 0.040729  | 0.226536  |
| Dnmt1            | 1.71604   | 1.69161         | 0          | 1         | 1         |
| Dnmt1            | 1.96189   | 2.27358         | 0          | 1         | 1         |
| S1pr2            | 0.952748  | 1.53682         | 0          | 1         | 1         |
| S1pr2_j1         | 1.40154   | 1.82843         | 0          | 1         | 1         |
| Raver1_j5        | 7.26046   | 8.71467         | 0.263385   | 0.208797  | 0.552841  |
| Raver1_j3        | 2.09254   | 2.11573         | 0.0158986  | 0.929408  | 0.978343  |
| Raver1_j2        | 2.28325   | 2.5446          | 0.156349   | 0.351174  | 0.688321  |



|            |             |                 |            |           |           |
|------------|-------------|-----------------|------------|-----------|-----------|
| Tyk2_j1    | 2.40837     | 2.22869         | 0          | 1         | 1         |
| Tyk2       | 0.795977    | 0.533581        | 0          | 1         | 1         |
| Tyk2_j4    | 1.02224     | 0.589983        | 0          | 1         | 1         |
| Cdc37_j8   | 0.0600402   | 0 -1.79769e+308 | 0.0724698  |           | 1         |
| Keap1      | 12.4985     | 12.4188         | 0          | 1         | 1         |
| Keap1      | 3.49978     | 3.27443         | 0          | 1         | 1         |
| Keap1      | 5.13184     | 4.12075         | 0          | 1         | 1         |
| Tmed1      | 2.61491     | 2.93499         | 0          | 1         | 1         |
| Yipf2      | 3.53193     | 3.47787         | 0          | 1         | 1         |
| Yipf2_j1   | 2.01089     | 1.47018         | 0          | 1         | 1         |
| Yipf2      | 3.31271     | 3.36849         | 0          | 1         | 1         |
| Spc24      | 0.275298    | 0.187594        | -0.553386  | 0.425786  | 0.740669  |
| Kank2      | 0.319096    | 0.462678        | 0          | 1         | 1         |
| Dock6_j3   | 1.4525      | 0.772982        | 0          | 1         | 1         |
| Dock6_j4   | 0.417032    | 0.35181         | 0          | 1         | 1         |
| Dock6      | 0.478701    | 0.112854        | 0          | 1         | 1         |
| Rab3d      | 39.6758     | 42.7439         | 0.10746    | 0.21387   | 0.559043  |
| Rgl3_j5    | 0.182047    | 0.0310121       | -2.55341   | 0.111442  | 0.415505  |
| Rgl3_j6    | 0.345337    | 0.0723708       | -2.25452   | 0.0072943 | 0.0680276 |
| Rgl3_j12   | 0.242372    | 0 -1.79769e+308 | 0.0023154  | 0.0280248 |           |
| Ccdc151    | 0.315997    | 0.446834        | 0.499831   | 0.212634  | 0.557695  |
| Ccdc151    | 0.292704    | 0.118154        | -1.30877   | 0.0715833 | 0.321711  |
| Elavl3_j2  | 4.8173      | 4.65726         | -0.0487433 | 0.69895   | 0.889085  |
| Elavl3_j4  | 2.15136     | 1.88638         | -0.18963   | 0.301554  | 0.647902  |
| Zfp653_j4  | 0.000226341 | 0.682607        | 11.5583    | 0.643433  | 0.862412  |
| Zfp653_j5  | 0.330354    | 0.215399        | -0.617     | 0.171174  | 0.507955  |
| Ecsit_j1   | 13.7859     | 14.9308         | 0.115095   | 0.384886  | 0.713573  |
| Elof1      | 27.6295     | 34.0364         | 0.300868   | 0.0082894 | 0.0745957 |
| Zfp810_j4  | 0.236551    | 0.271154        | 0          | 1         | 1         |
| Anln_j7    | 0.812791    | 0.787348        | -0.0458835 | 0.88223   | 0.962629  |
| Anln_j1    | 1.15757     | 0.734491        | -0.656279  | 0.0120986 | 0.0988019 |
| rp9        | 11.6596     | 13.7595         | 0.238911   | 0.062239  | 0.295391  |
| Dpy19l1_j1 | 4.23918     | 3.56747         | 0          | 1         | 1         |
| Dpy19l1    | 2.55676     | 2.35649         | 0          | 1         | 1         |
| Herpud2    | 4.64602     | 4.40281         | -0.0775693 | 0.521833  | 0.798431  |
| Glb1l2_j3  | 0.36038     | 0 -1.79769e+308 | 2.36E-09   | 1.85E-07  |           |
| Glb1l2     | 1.67471     | 0.747541        | -1.16369   | 4.64E-06  | 0.0001579 |
| Glb1l2_j4  | 1.24568     | 0.742764        | -0.745957  | 0.0107465 | 0.0902403 |
| Acad8_j1   | 6.55151     | 7.39659         | 0.175031   | 0.248864  | 0.596364  |
| Acad8      | 5.57819     | 5.04841         | -0.143967  | 0.323619  | 0.666652  |
| Vps26b     | 15.0991     | 15.1859         | 0.00826575 | 0.925853  | 0.976962  |
| Jam3       | 17.5764     | 18.4656         | 0.0712046  | 0.503244  | 0.78696   |
| Ntm_j1     | 0.129961    | 0 -1.79769e+308 | 0.0003688  |           | 1         |
| Ntm        | 1.19277     | 0.483534        | -1.30262   | 4.21E-05  | 0.0010299 |
| Adamts15   | 0.000220727 | 0.106735        | 0          | 1         | 1         |
| St14_j2    | 0.145853    | 0 -1.79769e+308 | 0.014543   | 0.112415  |           |
| Ap1p2_j2   | 31.3974     | 4.92296         | 0          | 1         | 1         |

|                  |           |             |               |           |           |
|------------------|-----------|-------------|---------------|-----------|-----------|
| Aplp2_j3         | 0.438255  | 0.127598    | 0             | 1         | 1         |
| Aplp2            | 86.8604   | 68.748      | 0             | 1         | 1         |
| Tmem45b          | 18.0014   | 17.3348     | -0.0544374    | 0.672157  | 0.87616   |
| Fli1             | 1.45329   | 1.45782     | 0.00449556    | 0.980703  | 0.994152  |
| St3gal4_j1       | 4.00638   | 4.28399     | 0             | 1         | 1         |
| St3gal4_j2       | 0.558201  | 0.566814    | 0             | 1         | 1         |
| Tirap            | 0.198153  | 0.273087    | 0.462743      | 0.26954   | 0.618722  |
| Tirap_j4         | 0.188184  | 0.000408874 | -8.84627      | 0.459745  | 0.761615  |
| Foxred1_j1       | 0.973609  | 1.62015     | 0             | 1         | 1         |
| Foxred1          | 5.03698   | 4.13238     | 0             | 1         | 1         |
| Ddx25            | 6.13827   | 5.46482     | -0.167659     | 0.102889  | 0.397405  |
| Chek1_j5         | 0.0468636 | 0.0937101   | 0.999736      | 0.363112  | 1         |
| Chek1            | 0         | 0.0560002   | 1.79769e+308  | 0.0595116 | 1         |
| Chek1_j4         | 0.0719802 | 0           | -1.79769e+308 | 0.0108074 | 1         |
| Stt3a            | 10.3094   | 10.0694     | -0.03398      | 0.726121  | 0.902816  |
| Ei24             | 6.91779   | 4.88144     | 0             | 1         | 1         |
| Ei24             | 21.2508   | 15.5301     | 0             | 1         | 1         |
| Pknox2_j8        | 0.722765  | 0.45446     | 0             | 1         | 1         |
| Slc37a2_j1       | 0.426705  | 0.370694    | -0.203011     | 0.634941  | 0.858349  |
| Slc37a2          | 0.464732  | 0.421557    | -0.14067      | 0.608006  | 0.845477  |
| Ccdc15_j4        | 0.0198393 | 0.0494203   | 1.31674       | 0.608779  | 1         |
| Ccdc15_j12       | 0.0562324 | 0.0403618   | -0.478411     | 0.727484  | 1         |
| Tbrg1            | 12.5199   | 13.1408     | 0.0698215     | 0.466224  | 0.765969  |
| AW551984         | 0.9763    | 0.404094    | -1.27263      | 4.84E-05  | 0.0011618 |
| Gramd1b_j5       | 0.138388  | 0           | 0             | 1         | 1         |
| Gramd1b_j6       | 0.689639  | 0           | 0             | 1         | 1         |
| Gramd1b_j9       | 5.0606    | 3.04913     | 0             | 1         | 1         |
| Gramd1b_j8       | 3.06493   | 1.82873     | 0             | 1         | 1         |
| XLOC_034759      | 0.0706281 | 0.147       | 1.0575        | 0.206704  | 1         |
| XLOC_034759      | 0.0955689 | 0           | -1.79769e+308 | 0.0019753 | 1         |
| XLOC_034759      | 0.185103  | 0.0246437   | -2.90904      | 0.0304773 | 0.187682  |
| 4931429I11Rik_j2 | 0.126831  | 0           | -1.79769e+308 | 1.86E-06  | 1         |
| 4931429I11Rik_j3 | 4.11254   | 3.24074     | -0.343706     | 0.0382067 | 0.217268  |
| Ubash3b_j8       | 0.340882  | 0.349117    | 0             | 1         | 1         |
| Ubash3b          | 8.60347   | 6.26881     | 0             | 1         | 1         |
| Sor1_j2          | 7.97558   | 5.83025     | 0             | 1         | 1         |
| Sor1             | 11.2545   | 6.94656     | 0             | 1         | 1         |
| Sc5d             | 25.2194   | 20.6601     | 0             | 1         | 1         |
| Tecta_j4         | 0.111944  | 0.103845    | -0.108343     | 0.847891  | 1         |
| Tecta_j3         | 0.235941  | 0.357955    | 0.601354      | 0.0794014 | 0.342156  |
| Tbcel_j2         | 6.52728   | 4.67208     | 0             | 1         | 1         |
| Tbcel            | 2.25596   | 1.8269      | 0             | 1         | 1         |
| Grik4_j1         | 1.54516   | 0.691559    | 0             | 1         | 1         |
| Grik4            | 2.15311   | 2.05947     | 0             | 1         | 1         |
| Arhgef12_j5      | 13.5738   | 13.2786     | 0             | 1         | 1         |
| Arhgef12_j7      | 0.349236  | 0.258016    | 0             | 1         | 1         |
| Arhgef12         | 3.63825   | 2.99688     | 0             | 1         | 1         |

|             |           |                 |            |           |           |
|-------------|-----------|-----------------|------------|-----------|-----------|
| Tmem136     | 0.56884   | 0.72117         | 0          | 1         | 1         |
| Tmem136_j3  | 0.147389  | 2.70E-05        | 0          | 1         | 1         |
| Pou2f3_j1   | 0.204376  | 0.164541        | -0.31278   | 0.576141  | 0.828702  |
| Oaf         | 0.832589  | 0.899834        | 0.112055   | 0.715333  | 0.897128  |
| XLOC_034776 | 0.410704  | 0.528908        | 0.364918   | 0.301178  | 0.647609  |
| XLOC_034776 | 0.064479  | 0.122747        | 0.928791   | 0.462665  | 1         |
| Cbl         | 0.109387  | 0.0396427       | 0          | 1         | 1         |
| Cbl         | 0.842054  | 0.725191        | 0          | 1         | 1         |
| Nlrx1_j3    | 0.593352  | 0.619182        | 0          | 1         | 1         |
| Nlrx1_j4    | 2.42387   | 1.85018         | 0          | 1         | 1         |
| Nlrx1_j2    | 0.556473  | 0.545067        | 0          | 1         | 1         |
| Abcg4_j1    | 0.190209  | 0.187314        | 0          | 1         | 1         |
| Abcg4       | 7.72978   | 6.36833         | 0          | 1         | 1         |
| Hinfp_j1    | 0.057285  | 0               | 0          | 1         | 1         |
| Hinfp_j2    | 0.168856  | 0.0444959       | 0          | 1         | 1         |
| Hinfp_j3    | 0.41017   | 9.09E-05        | 0          | 1         | 1         |
| C2cd2l_j2   | 0.148055  | 0 -1.79769e+308 | 0.0001522  | 0.0030553 |           |
| C2cd2l      | 18.0175   | 19.7783         | 0.134523   | 0.159227  | 0.49392   |
| Hmbs        | 0.889414  | 1.0955          | 0.300666   | 0.290278  | 0.637671  |
| Vps11_j3    | 6.56769   | 5.4623          | 0          | 1         | 1         |
| Trappc4_j1  | 34.6685   | 44.4278         | 0          | 1         | 1         |
| Trappc4     | 53.6055   | 56.4399         | 0          | 1         | 1         |
| Phldb1_j3   | 0.917939  | 1.10496         | 0          | 1         | 1         |
| Phldb1_j4   | 1.42593   | 1.52402         | 0          | 1         | 1         |
| Phldb1_j19  | 0.287005  | 0               | 0          | 1         | 1         |
| Arcn1       | 13.392    | 12.8238         | 0          | 1         | 1         |
| Tmem25_j6   | 16.1414   | 16.9188         | 0          | 1         | 1         |
| Mll1_j1     | 6.41163   | 6.16007         | 0          | 1         | 1         |
| Mll1_j5     | 0.682727  | 0.65847         | 0          | 1         | 1         |
| Ube4a_j1    | 1.82714   | 0.869144        | 0          | 1         | 1         |
| Ube4a_j3    | 0.074057  | 0.0831494       | 0          | 1         | 1         |
| Gm10684_j2  | 0.203517  | 0.10732         | 0          | 1         | 1         |
| Il10ra      | 0.542265  | 0.829998        | 0.614108   | 0.0255246 | 0.166683  |
| Cep164_j4   | 0.401583  | 0.0709528       | -2.50077   | 3.75E-06  | 0.0001319 |
| Pafah1b2    | 34.4611   | 33.9131         | 0          | 1         | 1         |
| XLOC_034805 | 0.129814  | 0 -1.79769e+308 | 0.0256484  | 1         |           |
| XLOC_034806 | 0.215506  | 0 -1.79769e+308 | 1.41E-06   | 5.55E-05  |           |
| XLOC_034806 | 0.138597  | 0.0701898       | -0.981557  | 0.230813  | 0.577845  |
| Fam55b_j3   | 0.544264  | 0.55997         | 0.0410409  | 1         | 1         |
| Fam55b_j4   | 0.0552459 | 0 -1.79769e+308 | 0.0405411  | 1         |           |
| Rexo2_j1    | 8.85779   | 11.613          | 0.390726   | 0.0433134 | 0.236191  |
| Rexo2       | 70.8063   | 74.6486         | 0.0762387  | 0.412294  | 0.731382  |
| Rbm7        | 1.23043   | 1.3005          | 0.0799097  | 0.772048  | 0.922643  |
| Rbm7        | 4.8148    | 4.68943         | -0.0380636 | 0.799345  | 0.933125  |
| Zbtb16_j1   | 0.265371  | 0.36859         | 0.474006   | 0.135025  | 0.457301  |
| Zbtb16_j2   | 0.179191  | 0.00902054      | -4.31214   | 0.0078117 | 0.0713527 |
| Zbtb16      | 0.0729802 | 0 -1.79769e+308 | 8.36E-05   | 1         |           |

|               |           |                 |            |           |           |
|---------------|-----------|-----------------|------------|-----------|-----------|
| Zbtb16        | 0.303898  | 0.217611        | -0.481832  | 0.138782  | 0.463293  |
| Htr3a_j2      | 54.3316   | 39.9392         | 0          | 1         | 1         |
| Htr3a         | 21.1042   | 15.006          | 0          | 1         | 1         |
| Htr3b_j1      | 0.456523  | 0.0182416       | -4.64539   | 0.0109889 | 0.0918645 |
| Htr3b         | 4.81523   | 3.9766          | -0.27607   | 0.0926633 | 0.374566  |
| Ttc12_j1      | 0.568427  | 0.304264        | 0          | 1         | 1         |
| Ttc12         | 0.356717  | 0.923552        | 0          | 1         | 1         |
| Ncam1_j4      | 1.5542    | 5.00905         | 0          | 1         | 1         |
| Ncam1_j6      | 6.52616   | 8.24105         | 0          | 1         | 1         |
| Ncam1         | 3.89141   | 3.32164         | 0          | 1         | 1         |
| Pts_j3        | 1.90896   | 1.99864         | 0          | 1         | 1         |
| Pts           | 8.39121   | 10.4624         | 0          | 1         | 1         |
| Sdhd          | 11.0041   | 8.4647          | -0.378508  | 0.0114267 | 0.0945674 |
| AU019823_j3   | 0.35476   | 0.358556        | 0.0153551  | 0.96933   | 0.991415  |
| Dlat          | 19.1337   | 16.6819         | 0          | 1         | 1         |
| 1110032A03Rik | 0.48529   | 0.0962775       | -2.33358   | 0.0328593 | 0.197425  |
| SIK2_j3       | 0.285783  | 0.170094        | -0.748589  | 0.0626284 | 0.296264  |
| Layn_j2       | 0.112816  | 0.312917        | 1.47181    | 0.0050295 | 0.0509717 |
| Gm684_j1      | 0.0638097 | 0.116883        | 0.873216   | 0.514245  | 1         |
| Gm684         | 0.24935   | 0 -1.79769e+308 |            | 0.0003348 | 0.0058496 |
| AK086943_j2   | 0.20698   | 0.172971        | -0.258961  | 0.804338  | 0.935135  |
| AK086943_j3   | 0.223591  | 0 -1.79769e+308 |            | 0.001909  | 0.0240802 |
| AK086943_j1   | 0.185029  | 0 -1.79769e+308 |            | 0.0044836 | 0.0467784 |
| Fdx1          | 5.93497   | 4.70753         | -0.33427   | 0.0615976 | 0.293296  |
| Gapdh         | 0.29758   | 0.161845        | -0.878665  | 0.142187  | 0.46882   |
| Zc3h12c_j1    | 1.97239   | 2.01641         | 0.0318507  | 0.89331   | 0.966325  |
| Zc3h12c_j3    | 0.30448   | 0.0690535       | -2.14056   | 0.0001159 | 0.0024351 |
| AI593442_j2   | 0.795122  | 0.902531        | 0          | 1         | 1         |
| AI593442_j1   | 11.5287   | 8.00247         | 0          | 1         | 1         |
| XLOC_034836   | 0.0942861 | 0.066445        | -0.504884  | 0.60682   | 1         |
| Ddx10         | 7.28683   | 6.88799         | -0.0812084 | 0.505933  | 0.78857   |
| Atm_j1        | 0.315576  | 0.11591         | 0          | 1         | 1         |
| Atm_j2        | 0.352888  | 0.463985        | 0          | 1         | 1         |
| Cul5_j2       | 1.41475   | 1.27708         | -0.147699  | 0.540017  | 0.808741  |
| Rab39         | 3.20383   | 3.48164         | 0.119967   | 0.454903  | 0.758773  |
| Elmod1        | 5.82056   | 6.56238         | 0.17306    | 0.209076  | 0.553253  |
| Tnfaip8l3     | 1.18861   | 0.953397        | -0.318123  | 0.15225   | 0.4837    |
| Dmxl2_j2      | 0.887846  | 0.313349        | 0          | 1         | 1         |
| Dmxl2_j7      | 0.879856  | 0.00291626      | 0          | 1         | 1         |
| Dmxl2_j6      | 3.10506   | 2.23066         | 0          | 1         | 1         |
| Cib2          | 16.6013   | 15.3149         | -0.116362  | 0.318573  | 0.662003  |
| Acsbg1        | 11.3823   | 10.7316         | 0          | 1         | 1         |
| Wdr61         | 6.01159   | 5.2757          | 0          | 1         | 1         |
| Wdr61         | 2.20226   | 2.40352         | 0          | 1         | 1         |
| Chrna3_j1     | 3.88098   | 4.23251         | 0.125093   | 0.4176    | 0.734655  |
| Chrna3        | 0.528012  | 0.81397         | 0.624405   | 0.0016666 | 0.0215699 |
| Chrn4         | 0.842064  | 1.04015         | 0.304785   | 0.18454   | 0.524945  |

|                  |           |            |               |           |           |
|------------------|-----------|------------|---------------|-----------|-----------|
| Etfa_j1          | 22.3204   | 20.6353    | 0             | 1         | 1         |
| Etfa_j2          | 0.790836  | 3.48244    | 0             | 1         | 1         |
| Etfa             | 16.8513   | 11.9633    | 0             | 1         | 1         |
| Scaper_j1        | 0.403628  | 0.318054   | -0.343754     | 0.149756  | 0.479467  |
| Tspan3           | 122.314   | 115.247    | -0.085871     | 0.316646  | 0.660102  |
| C230081A13Rik_j3 | 0.0743713 | 0          | -1.79769e+308 | 0.0002163 | 1         |
| Lingo1           | 8.28572   | 6.80658    | 0             | 1         | 1         |
| Lingo1_j4        | 3.96303   | 0.00146291 | 0             | 1         | 1         |
| Snx33            | 0.686329  | 0.762237   | 0.151339      | 0.477859  | 0.77269   |
| Neil1_j8         | 0.327738  | 0.276963   | -0.242854     | 0.663745  | 0.872653  |
| Neil1_j5         | 0.462663  | 0.415451   | -0.155283     | 0.75805   | 0.916747  |
| Neil1            | 0.418846  | 0.395598   | -0.0823858    | 0.872552  | 0.959686  |
| Neil1_j11        | 0.601361  | 0.566523   | -0.0860954    | 0.818302  | 0.941038  |
| Commd4           | 31.3235   | 34.4515    | 0.137321      | 0.219119  | 0.565521  |
| 1700017B05Rik_j2 | 0.170031  | 0.0538856  | -1.65783      | 0.0579105 | 0.282427  |
| 1700017B05Rik_j3 | 0.0849475 | 0          | -1.79769e+308 | 0.0012468 | 1         |
| 1700017B05Rik    | 0.617201  | 0.988702   | 0.679795      | 0.0048604 | 0.0496527 |
| Scamp5_j1        | 1.83739   | 1.84832    | 0             | 1         | 1         |
| Scamp5           | 12.0827   | 7.75737    | 0             | 1         | 1         |
| Csk_j3           | 1.59865   | 2.04583    | 0.355836      | 0.0623723 | 0.295598  |
| Clk3_j3          | 0.946521  | 0          | -1.79769e+308 | 4.37E-22  | 1.29E-19  |
| Clk3_j2          | 0         | 0.0651123  | 1.79769e+308  | 0.0214081 | 1         |
| Clk3             | 3.23176   | 2.99461    | -0.109953     | 0.391298  | 0.717886  |
| Clk3_j10         | 0.0464248 | 0.569972   | 3.61792       | 0.0030118 | 0.0345327 |
| Arid3b_j3        | 1.0186    | 0.294063   | -1.7924       | 8.77E-07  | 3.70E-05  |
| Islr             | 6.0466    | 8.20789    | 0.440888      | 0.0012899 | 0.0175184 |
| Islr             | 0.604253  | 0.600685   | -0.00854418   | 0.982588  | 0.994692  |
| Islr2            | 0.460348  | 0.10632    | -2.11432      | 0.0010205 | 0.0145269 |
| Islr2_j1         | 0.174943  | 0.28443    | 0.701189      | 0.181688  | 0.521867  |
| Islr2            | 0.445994  | 0.11992    | -1.89496      | 0.0025615 | 0.0304205 |
| Pml              | 0.304765  | 0.89256    | 0             | 1         | 1         |
| Pml_j3           | 0.403496  | 0.0719175  | 0             | 1         | 1         |
| Loxl1            | 0.96554   | 0.995229   | 0.0436931     | 0.832156  | 0.945814  |
| 2410076I21Rik_j4 | 0.250889  | 0.0560196  | 0             | 1         | 1         |
| 2410076I21Rik_j5 | 0.199922  | 0.300618   | 0             | 1         | 1         |
| Neo1_j3          | 2.35078   | 2.47477    | 0             | 1         | 1         |
| Neo1_j4          | 0.106767  | 0.0412495  | 0             | 1         | 1         |
| Bbs4_j3          | 0.850871  | 0          | 0             | 1         | 1         |
| Bbs4             | 9.52263   | 9.15567    | 0             | 1         | 1         |
| Arih1_j4         | 7.76181   | 5.71749    | 0             | 1         | 1         |
| Arih1            | 1.28337   | 1.11348    | 0             | 1         | 1         |
| Senp8            | 0.748357  | 0.508527   | 0             | 1         | 1         |
| Senp8            | 1.81407   | 1.92964    | 0             | 1         | 1         |
| Lrrc49_j1        | 0.0631538 | 0          | -1.79769e+308 | 0.0031275 | 1         |
| Lrrc49_j6        | 5.29541   | 4.37158    | -0.276587     | 0.18916   | 0.530721  |
| Rplp1_j1         | 148.331   | 183.273    | 0.305175      | 0.0019414 | 0.0244011 |
| Rplp1            | 19.5238   | 18.6705    | -0.0644723    | 0.73131   | 0.904922  |

|               |           |                 |            |           |           |
|---------------|-----------|-----------------|------------|-----------|-----------|
| Kif23_j5      | 0.105452  | 0.0606452       | -0.798123  | 0.248449  | 1         |
| Paqr5_j2      | 1.13093   | 0.907777        | -0.317106  | 0.0731961 | 0.325768  |
| Glce          | 7.74593   | 6.99848         | 0          | 1         | 1         |
| XLOC_034893   | 0.315382  | 0.243146        | -0.375282  | 0.602822  | 0.843195  |
| Coro2b        | 12.0848   | 9.47701         | 0          | 1         | 1         |
| Fem1b         | 18.8878   | 19.1812         | 0.0222435  | 0.799748  | 0.933125  |
| Pias1_j2      | 0.36207   | 8.73E-05        | 0          | 1         | 1         |
| Pias1         | 3.34316   | 2.1682          | 0          | 1         | 1         |
| Skor1_j1      | 0.137888  | 0.0379696       | -1.86058   | 0.101863  | 0.395416  |
| Map2k5_j3     | 1.59809   | 0 -1.79769e+308 |            | 9.12E-07  | 3.82E-05  |
| Map2k5_j8     | 0.984183  | 0.276804        | -1.83006   | 0.0012172 | 0.0167409 |
| 2300009A05Rik | 3.20579   | 2.89133         | -0.148944  | 0.572305  | 0.827134  |
| Gm6257        | 4.47078   | 5.20747         | 0.220056   | 0.238259  | 0.585128  |
| Smad3_j1      | 0.105525  | 0 -1.79769e+308 |            | 7.17E-05  | 1         |
| Smad6         | 0.714343  | 0.614686        | -0.216767  | 0.41117   | 0.730583  |
| Map2k1_j2     | 34.2743   | 37.6037         | 0          | 1         | 1         |
| Map2k1        | 1.60715   | 4.25617         | 0          | 1         | 1         |
| Map2k1_j5     | 27.9874   | 30.8439         | 0          | 1         | 1         |
| Dis3l         | 5.70368   | 3.35301         | 0          | 1         | 1         |
| Dis3l         | 2.38631   | 2.3742          | 0          | 1         | 1         |
| Rab11a        | 17.3702   | 18.07           | 0.056982   | 0.510066  | 0.790929  |
| Rab11a_j4     | 0.280293  | 0 -1.79769e+308 |            | 0.0140381 | 0.109696  |
| Ptplad1       | 58.5583   | 54.7995         | 0          | 1         | 1         |
| Plekho2_j1    | 1.19026   | 2.28548         | 0.941223   | 6.62E-05  | 0.0015128 |
| Plekho2       | 5.55436   | 8.41431         | 0.599226   | 5.64E-07  | 2.51E-05  |
| Zfp609_j1     | 0.0733991 | 0               | 0          | 1         | 1         |
| Zfp609        | 2.25118   | 2.16796         | 0          | 1         | 1         |
| Trip4_j5      | 0.579611  | 0.779408        | 0.427294   | 0.10491   | 0.402088  |
| Trip4_j6      | 0.603931  | 0.151056        | -1.9993    | 1.15E-05  | 0.0003498 |
| Snx22         | 0.339896  | 0.16812         | 0          | 1         | 1         |
| Snx1          | 26.725    | 28.2488         | 0.0799998  | 0.416015  | 0.733677  |
| Fbxl22        | 0.189215  | 0.195439        | 0          | 1         | 1         |
| Usp3_j5       | 0.18602   | 0               | 0          | 1         | 1         |
| Usp3          | 0.742662  | 0.712084        | 0          | 1         | 1         |
| Aph1c_j1      | 0.973813  | 1.48801         | 0          | 1         | 1         |
| Aph1c         | 1.20719   | 0.960526        | 0          | 1         | 1         |
| Lactb         | 3.67149   | 4.02865         | 0.133932   | 0.436825  | 0.747343  |
| Lactb         | 0.658144  | 0.951803        | 0.532261   | 0.167155  | 0.50345   |
| Tpm1          | 95.5088   | 93.7659         | -0.0265701 | 0.756261  | 0.91596   |
| Tln2_j6       | 1.44552   | 0.750122        | 0          | 1         | 1         |
| Tln2_j9       | 1.12766   | 0.6272          | 0          | 1         | 1         |
| Tln2_j11      | 8.41394   | 6.59829         | 0          | 1         | 1         |
| Tln2_j15      | 0.735337  | 0.560731        | 0          | 1         | 1         |
| Tln2_j14      | 4.63154   | 3.28015         | 0          | 1         | 1         |
| Fam81a        | 4.55238   | 2.5266          | 0          | 1         | 1         |
| Ccnb2_j3      | 0.0777253 | 0.141628        | 0.865652   | 0.264662  | 1         |
| Rnf111_j8     | 3.36216   | 3.22733         | 0          | 1         | 1         |

|                   |           |                 |             |           |           |
|-------------------|-----------|-----------------|-------------|-----------|-----------|
| Fam63b            | 5.34463   | 4.32259         | 0           | 1         | 1         |
| Grinl1a           | 47.4468   | 47.1243         | -0.00984179 | 0.912606  | 0.972469  |
| Gcom1_j3          | 0.196061  | 0.178432        | -0.135929   | 0.812492  | 0.938633  |
| Gcom1             | 0.212261  | 0.173365        | -0.292026   | 0.600362  | 0.841653  |
| Gcom1_j1          | 0.10429   | 0 -1.79769e+308 |             | 0.0018838 | 1         |
| Cgnl1_j5          | 0.0707017 | 0.0506936       | 0           | 1         | 1         |
| Cgnl1             | 4.4161    | 3.72298         | 0           | 1         | 1         |
| Tcf12_j5          | 0.129819  | 0               | 0           | 1         | 1         |
| Tcf12             | 0.640503  | 0.52453         | 0           | 1         | 1         |
| Tcf12_j6          | 0.394574  | 0.470794        | 0           | 1         | 1         |
| Tcf12_j7          | 0.295589  | 0.0278567       | 0           | 1         | 1         |
| Tcf12_j4          | 1.16378   | 1.10528         | 0           | 1         | 1         |
| Tex9              | 0.232817  | 0.673766        | 1.53305     | 3.95E-05  | 0.0009761 |
| Pigb_j1           | 1.53683   | 1.95419         | 0           | 1         | 1         |
| Unc13c_j1         | 1.7181    | 1.78244         | 0           | 1         | 1         |
| Unc13c_j2         | 0.949818  | 0.947932        | 0           | 1         | 1         |
| Unc13c_j3         | 0.90915   | 1.00373         | 0           | 1         | 1         |
| Mapk6_j3          | 1.57802   | 2.38721         | 0           | 1         | 1         |
| Mapk6             | 4.22852   | 5.19759         | 0           | 1         | 1         |
| Tmod2             | 3.74863   | 3.98041         | 0           | 1         | 1         |
| Tmod2             | 5.22549   | 4.63962         | 0           | 1         | 1         |
| Scg3              | 9.47001   | 9.45109         | 0           | 1         | 1         |
| Scg3              | 43.0953   | 37.6167         | 0           | 1         | 1         |
| Hcrtr2            | 1.75151   | 1.37852         | -0.345477   | 0.0624991 | 0.295796  |
| Hcrtr2_j1         | 0.901335  | 0.539762        | -0.739741   | 0.203947  | 0.548098  |
| 2310046A06Rik_j2  | 1.08796   | 0.925556        | -0.233239   | 0.636004  | 0.858939  |
| 2310046A06Rik_j5  | 0.703     | 0.457182        | -0.620755   | 0.388065  | 0.715611  |
| 2310046A06Rik_j6  | 0.418504  | 0 -1.79769e+308 |             | 3.41E-05  | 0.000863  |
| 2310046A06Rik_j11 | 1.08963   | 0.89232         | -0.288205   | 0.68348   | 0.881549  |
| Lrrc1             | 0.583359  | 0.619832        | 0.0874941   | 0.788295  | 0.929506  |
| Lrrc1_j6          | 0.0661827 | 0.195236        | 1.5607      | 0.0581776 | 0.2832    |
| Lrrc1_j5          | 0.183603  | 0.15632         | -0.232087   | 0.731039  | 0.904911  |
| Fbxo9_j1          | 0.414494  | 0 -1.79769e+308 |             | 0.0027421 | 0.0321277 |
| Fbxo9             | 8.26157   | 6.40372         | -0.367506   | 0.004751  | 0.0488114 |
| 7SK               | 17.962    | 23.6935         | 0.399544    | 0.0237512 | 0.158523  |
| Ooep              | 0.682682  | 0.717258        | 0.071277    | 0.810038  | 0.937853  |
| Eef1a1_j1         | 22.439    | 22.0978         | -0.0221021  | 0.848876  | 0.952186  |
| Eef1a1_j2         | 1.59006   | 2.55514         | 0.684319    | 0.0125778 | 0.10166   |
| Slc17a5           | 8.10213   | 7.09516         | -0.191466   | 0.11003   | 0.412815  |
| Cox7a2            | 0.147019  | 0.178493        | 0.27987     | 0.691284  | 0.885697  |
| Tmem30a           | 124.415   | 111.186         | 0           | 1         | 1         |
| Filip1_j3         | 1.04032   | 0.766208        | -0.441222   | 0.0400425 | 0.223971  |
| Filip1            | 2.69857   | 1.77227         | -0.606597   | 0.0004032 | 0.0068165 |
| Phip_j4           | 0.187607  | 0.177077        | 0           | 1         | 1         |
| Phip              | 0.399738  | 0.651103        | 0           | 1         | 1         |
| Hmgn3_j1          | 3.32372   | 3.4923          | 0           | 1         | 1         |
| Hmgn3             | 1.3479    | 0.727077        | 0           | 1         | 1         |

|                  |           |                 |            |           |           |
|------------------|-----------|-----------------|------------|-----------|-----------|
| Hmgn3            | 0.825278  | 0.96837         | 0          | 1         | 1         |
| Lca5_j4          | 0.366846  | 0.508608        | 0.471377   | 0.170596  | 0.507473  |
| Lca5_j6          | 0.0478499 | 0.103905        | 1.11868    | 0.205144  | 1         |
| Lca5_j9          | 0.305213  | 0.289741        | -0.0750517 | 0.856763  | 0.954683  |
| Lca5_j8          | 0.293148  | 0 -1.79769e+308 |            | 1.17E-09  | 9.68E-08  |
| Elovl4           | 25.8853   | 27.6743         | 0.0964121  | 0.295421  | 0.642035  |
| Fam46a           | 0.421728  | 0.524584        | 0.314861   | 0.258469  | 0.607218  |
| Ibtk_j1          | 2.21632   | 2.04577         | 0          | 1         | 1         |
| Ibtk_j4          | 1.15762   | 1.73505         | 0          | 1         | 1         |
| Ibtk             | 1.29988   | 1.20907         | 0          | 1         | 1         |
| Ube2cbp_j4       | 0.375112  | 0.563027        | 0.585883   | 0.248631  | 0.596089  |
| Ube2cbp          | 0.180901  | 0.218871        | 0.274887   | 0.673973  | 0.877027  |
| Pgm3             | 3.13877   | 3.11372         | 0          | 1         | 1         |
| Me1_j2           | 0.260166  | 0 -1.79769e+308 |            | 0.000825  | 0.0122722 |
| Me1_j7           | 0.456941  | 1.3584          | 1.57183    | 0.0065508 | 0.0625462 |
| Snap91_j4        | 26.7327   | 34.1188         | 0          | 1         | 1         |
| Snap91_j10       | 17.5662   | 16.7582         | 0          | 1         | 1         |
| 4922501C03Rik_j4 | 0.296172  | 0.202216        | -0.55054   | 0.302506  | 0.648495  |
| 4922501C03Rik    | 0.818319  | 0.966196        | 0.239653   | 0.191692  | 0.533938  |
| 4922501C03Rik_j5 | 0.212639  | 0.079571        | -1.41809   | 0.0080123 | 0.0726135 |
| Snx14_j1         | 11.0399   | 10.1398         | -0.122689  | 0.243196  | 0.590533  |
| Syncrip_j3       | 1.56077   | 1.05883         | 0          | 1         | 1         |
| Syncrip_j2       | 0.463463  | 0.997737        | 0          | 1         | 1         |
| Syncrip_j4       | 1.11642   | 0.449134        | 0          | 1         | 1         |
| Syncrip_j6       | 7.49338   | 8.16846         | 0          | 1         | 1         |
| 100039707        | 2.54597   | 2.01064         | -0.340564  | 0.376029  | 0.708112  |
| Gm2382           | 0.255736  | 0.00663796      | -5.26777   | 0.367598  | 0.701064  |
| AF529169_j4      | 0.764396  | 0.709296        | 0          | 1         | 1         |
| AF529169_j5      | 0.605279  | 0.273523        | 0          | 1         | 1         |
| AF529169_j3      | 0.484673  | 0.248877        | 0          | 1         | 1         |
| Tmed3            | 11.6937   | 13.0638         | 0.159847   | 0.243875  | 0.591133  |
| Ankrd34c         | 0.593995  | 0.258681        | -1.19928   | 0.0002927 | 0.0052367 |
| Ankrd34c         | 0.319157  | 0.0602781       | -2.40456   | 0.0001847 | 0.0035925 |
| Morf4l1_j1       | 34.1508   | 31.7037         | -0.107269  | 0.284453  | 0.633101  |
| Tbc1d2b          | 2.04121   | 1.72558         | -0.242338  | 0.1296    | 0.448468  |
| Zic1_j1          | 0.0905308 | 0.100874        | 0.156071   | 0.887856  | 1         |
| Zic1             | 0.578717  | 0.670929        | 0.213302   | 0.522688  | 0.798994  |
| 1190002N15Rik    | 5.39993   | 4.21202         | 0          | 1         | 1         |
| Chst2            | 7.72245   | 16.305          | 1.07818    | 0         | 0         |
| 2610101N10Rik_j3 | 3.82529   | 3.94024         | 0          | 1         | 1         |
| Trpc1            | 1.08842   | 0.90858         | 0          | 1         | 1         |
| Trpc1            | 3.10892   | 2.33279         | 0          | 1         | 1         |
| Pls1_j5          | 3.35139   | 1.67406         | 0          | 1         | 1         |
| Pls1_j3          | 1.94815   | 0.34363         | 0          | 1         | 1         |
| Atp1b3_j8        | 0.550365  | 0.313658        | 0          | 1         | 1         |
| Atp1b3           | 18.497    | 6.95342         | 0          | 1         | 1         |
| Rnf7_j2          | 0.282569  | 0.777806        | 1.46081    | 0.0280958 | 0.177892  |



|             |           |                        |              |           |           |
|-------------|-----------|------------------------|--------------|-----------|-----------|
| Rnf7_j1     | 12.8144   | 12.2229                | -0.0681749   | 0.656346  | 0.868894  |
| XLOC_034997 | 0.139615  | 0.0897222              | -0.63792     | 0.495304  | 0.78277   |
| Rasa2_j1    | 2.59858   | 2.31781                | 0            | 1         | 1         |
| Rasa2       | 2.96174   | 2.57658                | 0            | 1         | 1         |
| Zbtb38_j3   | 2.63381   | 3.20047                | 0            | 1         | 1         |
| Zbtb38_j4   | 1.87762   | 2.36849                | 0            | 1         | 1         |
| Acpl2_j2    | 0.139681  | 0.0765352              | -0.867941    | 0.394214  | 0.719811  |
| Acpl2       | 0.789877  | 0.784588               | -0.00969291  | 0.972165  | 0.991962  |
| Spsb4       | 3.38705   | 2.19687                | -0.624579    | 0.0003889 | 0.006625  |
| Slc25a36_j3 | 0.131864  | 0.046047               | 0            | 1         | 1         |
| Slc25a36_j8 | 1.72746   | 2.27382                | 0            | 1         | 1         |
| Clstn2      | 2.53771   | 2.0924                 | 0            | 1         | 1         |
| Mrps22      | 5.1305    | 5.4571                 | 0.0890342    | 0.458191  | 0.7608    |
| Pik3cb_j2   | 1.19167   | 1.18046                | 0            | 1         | 1         |
| Mras_j2     | 1.36383   | 0 -1.79769e+308        |              | 3.71E-24  | 1.17E-21  |
| Mras        | 14.9915   | 16.4891                | 0.137372     | 0.162832  | 0.498174  |
| Armc8_j1    | 8.72135   | 8.75343                | 0.00529562   | 0.960301  | 0.988692  |
| Armc8       | 0         | 0.0875193 1.79769e+308 |              | 0.007096  | 1         |
| Armc8_j4    | 0.164645  | 0 -1.79769e+308        |              | 0.000117  | 0.0024508 |
| Il20rb_j1   | 0.0879187 | 0.0788124              | -0.157749    | 0.896093  | 1         |
| Nck1_j1     | 6.74081   | 4.96717                | 0            | 1         | 1         |
| Nck1        | 1.2123    | 1.35398                | 0            | 1         | 1         |
| Tmem22      | 4.85823   | 4.6467                 | -0.0642241   | 0.742795  | 0.909993  |
| Pccb        | 21.3194   | 20.6181                | -0.0482591   | 0.628034  | 0.855132  |
| Ppp2r3a     | 1.99463   | 1.68133                | 0            | 1         | 1         |
| Ephb1       | 0.146949  | 0.0557816              | -1.39745     | 0.0637845 | 0.299552  |
| Cep63_j2    | 0.473159  | 0.527048               | 0            | 1         | 1         |
| Cep63_j1    | 0.11561   | 0.0354642              | 0            | 1         | 1         |
| Srprb       | 16.77     | 17.5982                | 0.0695397    | 0.519057  | 0.796784  |
| Trf         | 3.06441   | 5.08468                | 0.730547     | 1.80E-05  | 0.0005095 |
| Cdv3_j8     | 2.64357   | 3.11727                | 0            | 1         | 1         |
| Bfsp2_j1    | 0.151555  | 0.168337               | 0.151514     | 0.802384  | 0.934274  |
| Tmem108_j2  | 0.18207   | 0                      | 0            | 1         | 1         |
| Tmem108     | 2.66059   | 1.32189                | 0            | 1         | 1         |
| Uba5        | 3.28895   | 2.95759                | -0.153206    | 0.386974  | 0.714844  |
| Acpp_j1     | 0.197847  | 0.131254               | 0            | 1         | 1         |
| Acpp_j2     | 0.171681  | 0.399126               | 0            | 1         | 1         |
| Nudt16_j1   | 6.19553   | 6.29637                | 0.0232924    | 0.903977  | 0.969335  |
| Nudt16      | 6.62699   | 6.85552                | 0.0489104    | 0.743164  | 0.910188  |
| Nek11_j1    | 0.145393  | 0.0806918              | -0.849465    | 0.43019   | 0.743027  |
| Nek11_j2    | 0.0938764 | 0.0592203              | -0.664671    | 0.489529  | 1         |
| Atp2c1      | 23.6079   | 24.0214                | 0.0250511    | 0.780393  | 0.925835  |
| Atp2c1      | 3.53941   | 3.53856                | -0.000345885 | 0.998226  | 0.99923   |
| Glyctk_j1   | 0.473554  | 0.0969819              | -2.28774     | 0.0003002 | 0.0053464 |
| Glyctk_j2   | 0.438592  | 6.06E-05               | -12.8204     | 0.891852  | 0.965687  |
| Ppm1m       | 0.838548  | 1.11501                | 0.411089     | 0.226106  | 0.573388  |
| Alas1       | 21.3799   | 23.237                 | 0.120165     | 0.225269  | 0.57244   |

|                  |           |                 |            |           |           |
|------------------|-----------|-----------------|------------|-----------|-----------|
| Acy1_j1          | 0.180439  | 0.216533        | 0.263073   | 0.735411  | 0.906746  |
| Parp3_j3         | 2.08086   | 3.08702         | 0          | 1         | 1         |
| Parp3            | 0.0819145 | 1.69691         | 0          | 1         | 1         |
| Parp3            | 4.18852   | 4.86356         | 0          | 1         | 1         |
| Tex264_j1        | 12.2645   | 12.5663         | 0          | 1         | 1         |
| Tex264           | 9.99119   | 11.2355         | 0          | 1         | 1         |
| Tex264_j3        | 13.2012   | 16.5168         | 0          | 1         | 1         |
| Tex264           | 8.01682   | 8.62117         | 0          | 1         | 1         |
| Tex264           | 11.5835   | 12.7789         | 0          | 1         | 1         |
| Rad54l2_j4       | 0.124896  | 0 -1.79769e+308 |            | 2.58E-08  | 1         |
| Rad54l2          | 1.02945   | 0.95313         | -0.111136  | 0.54084   | 0.809067  |
| Manf             | 26.6862   | 28.064          | 0.0726258  | 0.500187  | 0.785035  |
| Dock3_j8         | 1.60543   | 0.79109         | -1.02105   | 2.37E-07  | 1.15E-05  |
| Dock3_j7         | 0.507132  | 0.479303        | -0.0814242 | 0.755204  | 0.915526  |
| Dock3_j5         | 1.84606   | 1.85548         | 0.0073447  | 0.96111   | 0.988976  |
| Mapkapk3_j5      | 0.0778615 | 0.0242093       | -1.68535   | 0.301456  | 1         |
| Mapkapk3         | 0.271382  | 0.399841        | 0.559103   | 0.206693  | 0.551333  |
| Mapkapk3         | 0.136125  | 0.107145        | -0.34537   | 0.66942   | 1         |
| Cyb561d2         | 1.62215   | 1.49783         | -0.115026  | 0.642103  | 0.861957  |
| Sema3b_j3        | 3.05224   | 3.01682         | -0.0168437 | 0.914899  | 0.973452  |
| Gnai2            | 99.5302   | 116.628         | 0          | 1         | 1         |
| Sema3f_j5        | 1.19771   | 1.10801         | 0          | 1         | 1         |
| Sema3f_j6        | 0.307188  | 0               | 0          | 1         | 1         |
| Sema3f_j7        | 0.743096  | 0.274264        | 0          | 1         | 1         |
| Sema3f           | 2.61111   | 1.48711         | 0          | 1         | 1         |
| Rbm5             | 14.2932   | 15.3797         | 0          | 1         | 1         |
| Rbm6             | 2.74478   | 2.76009         | 0.00802906 | 0.9617    | 0.989186  |
| Rbm6_j11         | 0.834744  | 1.2382          | 0.568842   | 0.0744961 | 0.329143  |
| 6230427J02Rik_j2 | 3.72392   | 3.34059         | -0.156716  | 0.504741  | 0.787836  |
| Rnf123_j4        | 10.55     | 11.6828         | 0          | 1         | 1         |
| Rnf123_j3        | 7.78788   | 5.63235         | 0          | 1         | 1         |
| Apeh_j1          | 0.113521  | 0.145701        | 0.360058   | 0.669328  | 1         |
| Bsn              | 1.08865   | 1.71503         | 0.655695   | 1.16E-06  | 4.70E-05  |
| Dag1_j3          | 3.95818   | 3.21998         | 0          | 1         | 1         |
| Dag1_j1          | 5.62633   | 6.8555          | 0          | 1         | 1         |
| Dag1             | 11.8774   | 9.81742         | 0          | 1         | 1         |
| Dag1             | 6.43688   | 6.07936         | 0          | 1         | 1         |
| Tcta_j1          | 3.65099   | 3.58505         | 0          | 1         | 1         |
| Klhdc8b_j5       | 10.4784   | 8.06937         | 0          | 1         | 1         |
| P4htm_j2         | 3.18787   | 3.20727         | 0          | 1         | 1         |
| Arih2_j5         | 1.63766   | 1.57585         | 0          | 1         | 1         |
| Atrip_j11        | 0.193336  | 0 -1.79769e+308 |            | 4.97E-05  | 0.0011876 |
| Atrip            | 0.0668233 | 0.0129286       | -2.36979   | 0.131417  | 1         |
| Ccdc72_j4        | 0         | 0.245842        | 0          | 1         | 1         |
| Camp             | 1.28132   | 0.781393        | -0.713506  | 0.0457264 | 0.244776  |
| Ptpn23_j4        | 7.15281   | 9.27739         | 0          | 1         | 1         |
| Klhl18_j1        | 0.275335  | 0.000147122     | 0          | 1         | 1         |

|                  |           |                 |            |           |           |
|------------------|-----------|-----------------|------------|-----------|-----------|
| Klh18            | 1.13238   | 0.950265        | 0          | 1         | 1         |
| Klh18            | 1.71966   | 1.72857         | 0          | 1         | 1         |
| Nbeal2_j4        | 0.294531  | 0.319549        | 0          | 1         | 1         |
| Pth1r_j2         | 3.56833   | 2.1929          | 0          | 1         | 1         |
| Pth1r            | 8.13948   | 6.48669         | 0          | 1         | 1         |
| Ccrl2_j2         | 0.238981  | 0.116726        | -1.03377   | 0.17791   | 0.517237  |
| Mlh1_j1          | 1.12513   | 0.948984        | -0.245631  | 0.58676   | 0.834589  |
| Mlh1             | 2.89941   | 2.26616         | -0.355512  | 0.0673538 | 0.310363  |
| Stac             | 3.42397   | 5.14552         | 0          | 1         | 1         |
| Stac             | 15.3454   | 22.5994         | 0          | 1         | 1         |
| Arpp21_j6        | 1.47965   | 0.623491        | -1.24681   | 7.49E-05  | 0.0016777 |
| Arpp21_j8        | 2.26791   | 2.04174         | -0.151567  | 0.436733  | 0.747288  |
| Arpp21_j7        | 1.35554   | 1.1106          | -0.287525  | 0.180996  | 0.520897  |
| Pdcd6ip          | 32.6715   | 31.7512         | -0.0412196 | 0.631247  | 0.8565    |
| Fbxl2_j5         | 1.46573   | 1.41265         | 0          | 1         | 1         |
| Crtap            | 6.0118    | 6.32369         | 0.0729689  | 0.607822  | 0.845351  |
| Cnot10_j4        | 0.2644    | 0.304082        | 0          | 1         | 1         |
| Cnot10_j3        | 0.366503  | 0.849081        | 0          | 1         | 1         |
| Cmtm7_j1         | 2.84308   | 3.41341         | 0.263756   | 0.3587    | 0.694     |
| Cmtm7            | 1.07214   | 1.6633          | 0.633551   | 0.04454   | 0.240823  |
| Cmtm8            | 1.62519   | 1.6443          | 0.0168605  | 0.944818  | 0.983636  |
| Gpd1l            | 16.8106   | 14.2711         | 0          | 1         | 1         |
| Stt3b_j2         | 0.32956   | 1.5483          | 2.23207    | 2.49E-08  | 1.60E-06  |
| Stt3b            | 9.2162    | 7.63422         | -0.271693  | 0.0108176 | 0.0906971 |
| Tgfbr2_j2        | 1.16454   | 1.76058         | 0          | 1         | 1         |
| Tgfbr2           | 0.692284  | 0.521289        | 0          | 1         | 1         |
| Tgfbr2           | 0.857029  | 1.1192          | 0          | 1         | 1         |
| Rbms3            | 7.58763   | 6.21173         | 0          | 1         | 1         |
| Cmc1             | 3.45313   | 3.20747         | 0          | 1         | 1         |
| Plcd1_j1         | 1.32139   | 1.74866         | 0          | 1         | 1         |
| Plcd1            | 0.101117  | 0.156172        | 0          | 1         | 1         |
| 9330176C04Rik_j2 | 0.0794907 | 0.0732003       | 0          | 1         | 1         |
| 9330176C04Rik_j6 | 0.129155  | 0.0771503       | 0          | 1         | 1         |
| Oxsr1_j3         | 0.137699  | 0.0160203       | 0          | 1         | 1         |
| Oxsr1            | 2.1035    | 2.3201          | 0          | 1         | 1         |
| Myd88            | 1.51839   | 1.68085         | 0          | 1         | 1         |
| Scn10a_j8        | 33.4195   | 26.075          | -0.358022  | 0.0007642 | 0.0115368 |
| Scn11a           | 21.9369   | 14.98           | -0.550322  | 6.41E-09  | 4.69E-07  |
| Gorasp1          | 13.0662   | 10.8555         | 0          | 1         | 1         |
| Csrnp1_j3        | 1.06391   | 1.84891         | 0          | 1         | 1         |
| Csrnp1           | 0.542233  | 0.457792        | 0          | 1         | 1         |
| Cx3cr1           | 1.07894   | 2.58554         | 1.26086    | 2.84E-14  | 5.15E-12  |
| AK085969         | 0.226485  | 0.243931        | 0.107058   | 0.794023  | 0.931286  |
| Ulk4_j17         | 0.0970836 | 0 -1.79769e+308 | 0.0009554  |           | 1         |
| Cck              | 0.608453  | 0.180217        | -1.75541   | 0.075407  | 0.331468  |
| Sec22c_j2        | 0.156611  | 0.0418362       | 0          | 1         | 1         |
| Sec22c           | 2.86615   | 1.82366         | 0          | 1         | 1         |

|               |           |            |               |           |           |
|---------------|-----------|------------|---------------|-----------|-----------|
| AK089135_j1   | 0.270025  | 0.0565186  | -2.2563       | 2.46E-05  | 0.000654  |
| Hhatl_j1      | 0.699976  | 0.25468    | -1.45862      | 0.0348138 | 0.204924  |
| Hhatl         | 0.887671  | 0.607615   | -0.546868     | 0.0147622 | 0.113587  |
| Ccdc13_j2     | 0.807774  | 0.742812   | -0.120954     | 0.785762  | 0.928253  |
| Gm9790        | 0.312994  | 0.32142    | 0.0383237     | 0.937362  | 0.980776  |
| C85492        | 5.006     | 4.69548    | 0             | 1         | 1         |
| Ano10         | 4.55427   | 5.18472    | 0             | 1         | 1         |
| Ano10_j3      | 18.5204   | 20.6065    | 0             | 1         | 1         |
| XLOC_035130   | 2.06059   | 2.59208    | 0.331053      | 0.237518  | 0.58428   |
| XLOC_035131   | 0.136015  | 0.0351718  | -1.95127      | 0.230775  | 1         |
| XLOC_035131   | 0.0925813 | 0.0697791  | -0.407925     | 0.767933  | 1         |
| Zfp445_j1     | 7.99881   | 8.58482    | 0             | 1         | 1         |
| Zfp445_j5     | 3.14638   | 3.25136    | 0             | 1         | 1         |
| Zfp445_j4     | 3.41946   | 2.43213    | 0             | 1         | 1         |
| 1110059G10Rik | 12.5014   | 12.1732    | -0.0383798    | 0.798395  | 0.933105  |
| Zdhhc3_j1     | 0.984344  | 1.19481    | 0.27955       | 0.0509612 | 0.261614  |
| Lztf1_j3      | 2.88623   | 2.48054    | -0.218532     | 0.138952  | 0.463576  |
| Lztf1_j5      | 0.435846  | 0.244574   | -0.833548     | 0.289697  | 0.637033  |
| Fyco1_j5      | 0.666244  | 0.414094   | -0.686092     | 0.045994  | 0.245535  |
| Fyco1         | 0.0941848 | 0          | -1.79769e+308 | 1.84E-06  | 1         |
| Ccr1          | 0.210013  | 0.614306   | 1.54848       | 6.82E-06  | 0.0002225 |
| Alkbh8_j2     | 0         | 0.140007   | 0             | 1         | 1         |
| Casp12_j1     | 2.52597   | 2.42185    | -0.0607259    | 0.773551  | 0.923145  |
| Pdgfd         | 0.515331  | 0.131145   | -1.97433      | 0.0009435 | 0.0136462 |
| Trpc6         | 1.72597   | 1.88063    | 0.123807      | 0.589298  | 0.836005  |
| Mtmr2_j2      | 1.33958   | 1.36649    | 0             | 1         | 1         |
| Sesn3_j1      | 2.26158   | 0.00952034 | 0             | 1         | 1         |
| Mre11a_j2     | 1.38647   | 1.02295    | 0             | 1         | 1         |
| XLOC_034142   | 0.0889123 | 0.095625   | 0.105006      | 0.930425  | 1         |
| Taf1d         | 2.27033   | 2.3813     | 0.0688433     | 0.69625   | 0.888054  |
| Zfp317        | 0.081742  | 0          | 0             | 1         | 1         |
| Zfp846_j4     | 0.402801  | 0.485021   | 0             | 1         | 1         |
| Zfp846_j6     | 1.05992   | 1.07523    | 0             | 1         | 1         |
| Ubl5_j3       | 0.801237  | 0.770625   | 0             | 1         | 1         |
| Ubl5_j2       | 0.0439705 | 0.0775349  | 0             | 1         | 1         |
| Pin1_j1       | 42.7145   | 42.0621    | -0.0222055    | 0.868286  | 0.958254  |
| Ppan_j3       | 0.71587   | 1.0038     | 0.487704      | 0.216712  | 0.562879  |
| Mrpl4_j1      | 3.81802   | 3.16695    | 0             | 1         | 1         |
| Icam1_j2      | 0.0548273 | 0.0570522  | 0.0573883     | 0.967053  | 1         |
| Icam5_j2      | 0.0407972 | 0.174586   | 2.0974        | 0.132453  | 0.452839  |
| Pde4a         | 0.341589  | 0.139112   | -1.29601      | 0.0188408 | 0.135332  |
| Ilf3_j2       | 0.211341  | 0.148448   | 0             | 1         | 1         |
| Ilf3_j1       | 0.167112  | 0.104875   | 0             | 1         | 1         |
| Qtrt1_j3      | 0.607043  | 0.418029   | -0.538196     | 0.395743  | 0.720791  |
| Qtrt1_j6      | 0.285446  | 0.465221   | 0.704697      | 0.287443  | 0.635587  |
| Dnm2_j3       | 3.04487   | 2.76297    | 0             | 1         | 1         |
| Dnm2_j2       | 0.137323  | 0.0949767  | 0             | 1         | 1         |

|                  |           |           |              |           |           |
|------------------|-----------|-----------|--------------|-----------|-----------|
| Dnm2_j8          | 0.496954  | 0.867476  | 0            | 1         | 1         |
| XLOC_034167      | 0.0792359 | 0.0161634 | -2.29342     | 0.398989  | 1         |
| AB124611         | 0.101136  | 0.486325  | 2.26563      | 0.0058038 | 0.0570402 |
| Carm1_j2         | 0.179103  | 0.350067  | 0            | 1         | 1         |
| Smarca4          | 2.04462   | 2.80854   | 0            | 1         | 1         |
| Smarca4          | 8.71749   | 10.4249   | 0            | 1         | 1         |
| Smarca4_j5       | 12.9843   | 13.9478   | 0            | 1         | 1         |
| Prkcsh_j2        | 7.71883   | 8.59319   | 0.154813     | 0.303462  | 0.649082  |
| Zfp809_j1        | 0         | 0.132152  | 0            | 1         | 1         |
| Zfp809_j3        | 0.459189  | 0.556955  | 0            | 1         | 1         |
| Bbs9_j3          | 0.835786  | 0.600804  | -0.476238    | 0.146237  | 0.474497  |
| B3gat1_j2        | 0.403861  | 0.156044  | -1.37191     | 0.0150945 | 0.115397  |
| Igsf9b_j5        | 0.349694  | 0.371835  | 0            | 1         | 1         |
| Igsf9b_j7        | 0.0482363 | 0.0739988 | 0            | 1         | 1         |
| Opcm1_j6         | 1.00252   | 0.725668  | -0.466249    | 0.0526599 | 0.266521  |
| Opcm1_j9         | 2.40117   | 1.64587   | -0.54489     | 0.0022457 | 0.027296  |
| Snx19_j1         | 6.99345   | 8.40303   | 0            | 1         | 1         |
| Adamts8          | 1.66163   | 1.51016   | -0.137898    | 0.51481   | 0.793837  |
| Prdm10           | 0.0915181 | 0.135973  | 0.571194     | 0.37051   | 1         |
| Prdm10_j3        | 0.246531  | 0.129767  | -0.92584     | 0.267057  | 0.616066  |
| Nfrkb            | 1.5054    | 1.03822   | -0.536035    | 0.0132455 | 0.105395  |
| Nfrkb_j3         | 0.590006  | 1.12145   | 0.926558     | 0.0010511 | 0.0148592 |
| Nfrkb_j6         | 1.74493   | 0.953233  | -0.872272    | 0.0013548 | 0.0182323 |
| XLOC_034199      | 0.127442  | 0.0552495 | -1.20581     | 0.272154  | 1         |
| Arhgap32_j6      | 0.758319  | 0.752709  | -0.0107118   | 0.958615  | 0.988071  |
| Ets1_j2          | 0.0442936 | 0.156631  | 0            | 1         | 1         |
| Kirrel3_j6       | 0.30337   | 0.550236  | 0            | 1         | 1         |
| Rpusd4           | 7.19676   | 8.75741   | 0            | 1         | 1         |
| Fez1             | 114.136   | 105.052   | 0            | 1         | 1         |
| Fez1_j6          | 0.807799  | 0.958031  | 0            | 1         | 1         |
| Fez1_j7          | 3.0704    | 5.9523    | 0            | 1         | 1         |
| XLOC_034212      | 0.157626  | 0.0991285 | -0.669137    | 0.583804  | 0.83315   |
| Hepacam_j2       | 4.60153   | 4.1095    | -0.163152    | 0.283807  | 0.632215  |
| BC024479_j4      | 0.532195  | 0.925226  | 0.797851     | 0.0745999 | 0.329482  |
| BC024479_j5      | 0.0461337 | 0.145854  | 1.66063      | 0.0087361 | 1         |
| Vsig2_j1         | 0         | 0.0556359 | 1.79769e+308 | 0.0320669 | 1         |
| Scn3b_j1         | 2.94762   | 2.9231    | 0            | 1         | 1         |
| Scn3b_j4         | 2.813     | 3.60271   | 0            | 1         | 1         |
| XLOC_034226      | 0.0841372 | 0.0755986 | -0.154384    | 0.86449   | 1         |
| 9030425E11Rik_j1 | 2.58219   | 2.69076   | 0.0594206    | 0.724048  | 0.901852  |
| Bsx_j1           | 0.0507947 | 0.0626379 | 0.302359     | 0.811321  | 1         |
| 2610203C20Rik    | 0.628608  | 0.383942  | -0.71127     | 0.115352  | 0.422416  |
| XLOC_034236      | 0.0864925 | 0.0959378 | 0.149524     | 0.924666  | 1         |
| Thy1_j1          | 294.409   | 345.111   | 0            | 1         | 1         |
| Usp2             | 0.714011  | 0.580177  | 0            | 1         | 1         |
| Mcam_j3          | 0.213945  | 0.289027  | 0            | 1         | 1         |
| Slc37a4_j6       | 0.727175  | 0.583252  | -0.318183    | 0.485412  | 0.777011  |

|                  |           |                       |            |           |           |
|------------------|-----------|-----------------------|------------|-----------|-----------|
| Slc37a4_j3       | 0.818955  | 0.59872               | -0.451902  | 0.314048  | 0.658298  |
| AK078316_j1      | 0.250135  | 0.34005               | 0.44304    | 0.521498  | 0.798243  |
| Bcl9l_j3         | 0.167428  | 0                     | 0          | 1         | 1         |
| Ddx6_j3          | 0.283605  | 0 -1.79769e+308       |            | 1.62E-10  | 1.57E-08  |
| Ift46_j2         | 2.40161   | 2.61048               | 0          | 1         | 1         |
| Scn2b            | 3.80728   | 2.91024               | 0          | 1         | 1         |
| Scn4b_j5         | 0         | 2.87422               | 0          | 1         | 1         |
| Bace1            | 18.0081   | 15.3455               | 0          | 1         | 1         |
| Sik3_j2          | 1.81638   | 1.56091               | 0          | 1         | 1         |
| Bud13_j5         | 1.06462   | 0.980637              | -0.118548  | 0.703507  | 0.891491  |
| 2900052N01Rik_j1 | 0.904792  | 0.968901              | 0.0987629  | 0.767343  | 0.920619  |
| 2900052N01Rik_j3 | 5.22182   | 5.15121               | -0.0196411 | 0.908986  | 0.971253  |
| Cadm1            | 27.9946   | 22.5572               | 0          | 1         | 1         |
| Cadm1            | 14.4401   | 13.2374               | 0          | 1         | 1         |
| Fam55d_j4        | 1.23173   | 1.39989               | 0.184633   | 0.587488  | 0.835056  |
| Usp28_j3         | 2.24937   | 2.34486               | 0.0599809  | 0.808769  | 0.937207  |
| Zw10_j2          | 1.28685   | 1.93507               | 0.588546   | 0.0652406 | 0.304309  |
| Tmprss5_j6       | 0.379508  | 0.458                 | 0.271216   | 0.555054  | 0.817979  |
| Tmprss5_j9       | 1.03351   | 1.77301               | 0.778642   | 0.0321544 | 0.194495  |
| Drd2_j9          | 0.066554  | 0.22787               | 1.77561    | 0.0048447 | 0.0495131 |
| Timm8b           | 17.4643   | 20.6819               | 0.24396    | 0.0529266 | 0.267435  |
| Pih1d2           | 0.415053  | 0.309072              | -0.425355  | 0.32032   | 0.663651  |
| Cryab            | 0.895246  | 0.669669              | -0.418835  | 0.265741  | 0.614701  |
| Fdxacb1          | 0.331307  | 0.386865              | 0.22366    | 0.485641  | 0.777195  |
| Arhgap20_j4      | 1.07233   | 0.969333              | 0          | 1         | 1         |
| Kdelc2_j1        | 0.149839  | 0.204048              | 0.445492   | 0.47264   | 0.769633  |
| 4930550C14Rik_j2 | 0.198778  | 0.165189              | -0.267039  | 0.647339  | 0.864073  |
| Npat_j1          | 0.106     | 0.0207659             | -2.35177   | 0.0333759 | 1         |
| Slc35f2          | 0.618308  | 0.611497              | 0          | 1         | 1         |
| Dnaja4           | 7.5782    | 6.63453               | 0          | 1         | 1         |
| Dnaja4_j1        | 4.06762   | 4.06851               | 0          | 1         | 1         |
| Ireb2            | 6.6641    | 6.061                 | 0          | 1         | 1         |
| Ireb2_j2         | 0.67033   | 0.542263              | 0          | 1         | 1         |
| Psma4_j2         | 0.159405  | 0.0572964             | -1.47618   | 0.321896  | 0.664958  |
| Ube2q2_j8        | 49.1055   | 46.0239               | -0.0935028 | 0.314354  | 0.658565  |
| Pstpip1_j2       | 0         | 0.210573 1.79769e+308 |            | 0.081821  | 0.348488  |
| XLOC_034318      | 0.381814  | 0.408036              | 0.0958259  | 0.820364  | 0.941839  |
| Man2c1_j2        | 0.0522847 | 0.0768178             | 0          | 1         | 1         |
| Man2c1_j4        | 0.028238  | 0.0501742             | 0          | 1         | 1         |
| Man2c1_j7        | 5.55802   | 5.31703               | 0          | 1         | 1         |
| Cox5a            | 0.222129  | 0.210658              | 0          | 1         | 1         |
| Cox5a_j3         | 61.9769   | 66.0256               | 0          | 1         | 1         |
| 2310046O06Rik    | 0.596304  | 0.546908              | 0          | 1         | 1         |
| Ubl7             | 25.1447   | 26.5588               | 0.078932   | 0.496239  | 0.783139  |
| Ubl7_j3          | 6.1776    | 3.31586               | -0.89766   | 0.0013249 | 0.0179197 |
| Sema7a           | 4.50171   | 2.00516               | -1.16676   | 7.70E-10  | 6.61E-08  |
| Sema7a_j2        | 0.306617  | 0 -1.79769e+308       |            | 7.18E-07  | 3.12E-05  |

|             |           |           |               |           |           |
|-------------|-----------|-----------|---------------|-----------|-----------|
| Stra6_j5    | 0.0619011 | 0.0139559 | -2.14909      | 0.252529  | 1         |
| Nptn        | 40.3747   | 35.9201   | 0             | 1         | 1         |
| Nptn        | 7.30472   | 4.75635   | 0             | 1         | 1         |
| Celf6_j2    | 1.8928    | 2.04484   | 0.111465      | 0.716297  | 0.897624  |
| Celf6_j1    | 1.21501   | 2.03536   | 0.744322      | 0.0037283 | 0.0408166 |
| Celf6_j3    | 0         | 0.100204  | 1.79769e+308  | 0.116119  | 1         |
| Parp6_j4    | 2.15912   | 2.56452   | 0             | 1         | 1         |
| Parp6_j6    | 5.68989   | 6.92585   | 0             | 1         | 1         |
| Pkm2_j6     | 25.4097   | 14.6024   | 0             | 1         | 1         |
| Myo9a_j3    | 9.69316   | 9.0092    | 0             | 1         | 1         |
| Uaca_j1     | 0.836049  | 0.911396  | 0             | 1         | 1         |
| Uaca_j7     | 0.197775  | 0.212435  | 0             | 1         | 1         |
| XLOC_034353 | 0.124896  | 0.122682  | -0.0258085    | 0.984427  | 1         |
| Tle3_j3     | 2.79638   | 3.79651   | 0             | 1         | 1         |
| Tle3        | 1.34212   | 1.58676   | 0             | 1         | 1         |
| Itga11_j3   | 0.234339  | 0.0932046 | -1.33012      | 0.141577  | 0.468105  |
| Calml4      | 4.41887   | 3.88149   | -0.187065     | 0.425497  | 0.74056   |
| Aagab       | 1.39958   | 1.97538   | 0.49714       | 0.0062697 | 0.0606301 |
| Igdcc3_j3   | 0         | 0.130317  | 1.79769e+308  | 0.0923569 | 1         |
| Parp16      | 0.233699  | 0.342356  | 0.550844      | 0.262933  | 0.611778  |
| Clpx_j2     | 1.26145   | 1.11953   | 0             | 1         | 1         |
| Gm514_j3    | 0.081028  | 0         | -1.79769e+308 | 0.0006806 | 1         |
| Mtfmt_j4    | 3.61434   | 3.75134   | 0.0536735     | 0.784084  | 0.927348  |
| Spg21_j1    | 14.0672   | 14.4294   | 0.036677      | 0.742838  | 0.909993  |
| Fam96a      | 10.2858   | 11.4042   | 0.148916      | 0.269634  | 0.618744  |
| Herc1_j6    | 0.26547   | 0.875704  | 0             | 1         | 1         |
| Herc1_j7    | 7.04034   | 5.63638   | 0             | 1         | 1         |
| Rps27l_j1   | 22.9551   | 23.5399   | 0.0362967     | 0.829293  | 0.944936  |
| Vps13c_j8   | 2.37413   | 3.23118   | 0.444661      | 0.0135576 | 0.107097  |
| Myo1e_j2    | 0         | 0.590549  | 1.79769e+308  | 5.86E-07  | 2.60E-05  |
| Sltm_j1     | 0.114183  | 0.0528972 | 0             | 1         | 1         |
| Sltm_j2     | 0.24279   | 0.14682   | 0             | 1         | 1         |
| Adam10_j2   | 1.90714   | 3.54243   | 0             | 1         | 1         |
| Znf280d_j6  | 0.77044   | 0.941584  | 0.289407      | 0.593904  | 0.838316  |
| Mns1        | 0.530808  | 0.466642  | -0.185875     | 0.510352  | 0.791044  |
| Dyx1c1_j2   | 0.0927835 | 0.0561851 | -0.723683     | 0.588134  | 1         |
| Dyx1c1_j6   | 0.143648  | 0.170682  | 0.248769      | 0.834066  | 0.946622  |
| Ccpg1_j1    | 0.336577  | 0.083552  | 0             | 1         | 1         |
| BC031353    | 1.8254    | 2.27628   | 0             | 1         | 1         |
| BC031353    | 3.00211   | 2.83      | 0             | 1         | 1         |
| Arpp19_j2   | 0.216888  | 1.33386   | 0             | 1         | 1         |
| Myo5a_j2    | 22.4503   | 21.8406   | 0             | 1         | 1         |
| Gnb5_j1     | 5.33748   | 9.87133   | 0.887086      | 1.25E-07  | 6.52E-06  |
| XLOC_034422 | 0.0628312 | 0.0984558 | 0.647996      | 0.598782  | 1         |
| XLOC_034422 | 0.0170754 | 0.119021  | 2.80123       | 0.103389  | 1         |
| Lysmd2_j1   | 18.2126   | 18.2057   | 0             | 1         | 1         |
| Lysmd2      | 6.36331   | 4.83139   | 0             | 1         | 1         |

|             |           |            |              |           |           |
|-------------|-----------|------------|--------------|-----------|-----------|
| Gclc_j3     | 0.43667   | 0.323295   | 0            | 1         | 1         |
| Gclc_j4     | 0.665331  | 0.692683   | 0            | 1         | 1         |
| Ick         | 0.952271  | 0.989842   | 0            | 1         | 1         |
| AK050586    | 0.0558405 | 0.00987893 | -2.49888     | 0.480606  | 1         |
| XLOC_034440 | 0.400951  | 0.235554   | 0            | 1         | 1         |
| Senp6_j6    | 0.153632  | 0.0306568  | 0            | 1         | 1         |
| Senp6_j4    | 2.99937   | 1.57285    | 0            | 1         | 1         |
| Senp6_j5    | 0.165431  | 1.91622    | 0            | 1         | 1         |
| Myo6_j12    | 0.490503  | 0.502961   | 0.0361842    | 0.914047  | 0.973052  |
| XLOC_034444 | 0.555866  | 0.628608   | 0.177424     | 0.887868  | 0.964616  |
| AK052495_j3 | 0.302806  | 0.243496   | 0            | 1         | 1         |
| Irak1bp1_j2 | 1.98028   | 2.27983    | 0.203225     | 0.472429  | 0.769519  |
| XLOC_034451 | 0.0810997 | 0.0525827  | -0.625109    | 0.649436  | 1         |
| Prss35      | 0.84553   | 0.354343   | -1.25471     | 0.0051323 | 0.0517249 |
| Cyb5r4_j1   | 0.15139   | 0.129139   | -0.229348    | 0.81837   | 0.941038  |
| Cyb5r4_j3   | 0.0783383 | 0.597711   | 2.93166      | 0.0088535 | 0.0782415 |
| Mrap2_j3    | 0.0758669 | 0.280657   | 1.88727      | 0.0402275 | 0.224622  |
| Mrap2_j6    | 0.277138  | 0.0806603  | -1.78067     | 0.0754663 | 0.331566  |
| Zfp949_j1   | 1.22915   | 1.53454    | 0            | 1         | 1         |
| Bcl2a1b_j1  | 0         | 0.0876608  | 1.79769e+308 | 0.134602  | 1         |
| Mthfs_j1    | 5.09346   | 4.32727    | -0.23519     | 0.348022  | 0.686627  |
| Rasgrf1_j5  | 1.86278   | 1.76338    | 0            | 1         | 1         |
| Ctsh_j2     | 1.45684   | 2.47467    | 0.764396     | 0.0854871 | 0.357019  |
| Adamts7_j14 | 0.148846  | 0.159672   | 0.101294     | 0.890698  | 0.965446  |
| Adamts7_j17 | 0.377573  | 0.336036   | -0.168143    | 0.778112  | 0.925044  |
| Plscr4_j1   | 0.164613  | 0.423691   | 1.36394      | 0.0117973 | 0.096959  |
| Plscr4_j2   | 3.00112   | 2.89308    | -0.052897    | 0.802261  | 0.934265  |
| Slc9a9      | 15.6795   | 11.9076    | 0            | 1         | 1         |
| Slc9a9_j5   | 0.0815035 | 0          | 0            | 1         | 1         |
| Pcolce2_j2  | 1.55423   | 1.59644    | 0.0386549    | 0.863096  | 0.956634  |
| Atr_j2      | 4.28046   | 2.96867    | -0.527952    | 7.77E-06  | 0.0002489 |
| Xrn1_j5     | 0.119132  | 0.112552   | 0            | 1         | 1         |
| Tfdp2_j9    | 0.904832  | 0.8488     | 0            | 1         | 1         |
| XLOC_034490 | 0.0698632 | 0.150846   | 1.11047      | 0.302439  | 1         |
| Copb2_j1    | 21.7825   | 21.2269    | -0.0372732   | 0.691469  | 0.885712  |
| Dzip1l_j3   | 0.413217  | 0.2238     | -0.884688    | 0.0308287 | 0.1892    |
| Rab6b_j6    | 110.534   | 110.143    | 0            | 1         | 1         |
| Nphp3_j3    | 0.0681728 | 0.0167671  | -2.02356     | 0.456698  | 1         |
| Nphp3_j4    | 0.0398427 | 0.135677   | 1.76779      | 0.377871  | 1         |
| Acad11_j1   | 8.50676   | 8.55651    | 0.00841183   | 0.955438  | 0.987197  |
| Cpne4_j2    | 0.354973  | 0          | 0            | 1         | 1         |
| Cpne4       | 12.3496   | 9.08767    | 0            | 1         | 1         |
| Mrpl3_j2    | 0.383866  | 0.42132    | 0.134313     | 0.863632  | 0.956634  |
| Mrpl3_j3    | 10.725    | 11.1007    | 0.0496724    | 0.858749  | 0.95526   |
| Aste1_j4    | 0.406137  | 0.142815   | -1.50782     | 0.0499538 | 0.258241  |
| Wdr82_j1    | 0.301361  | 0.384808   | 0            | 1         | 1         |
| Pcbp4_j5    | 33.2079   | 35.4248    | 0            | 1         | 1         |



|             |           |                       |           |           |           |
|-------------|-----------|-----------------------|-----------|-----------|-----------|
| Pcbp4_j8    | 2.2847    | 2.96513               | 0         | 1         | 1         |
| Cish        | 0.244743  | 0.744264              | 1.60454   | 0.0022609 | 0.0274608 |
| Cacna2d2    | 0.690181  | 0.616685              | 0         | 1         | 1         |
| Zmynd10_j1  | 0.082876  | 0.0984224             | 0.248032  | 0.766198  | 1         |
| Hyal1_j2    | 1.88447   | 1.06254               | -0.826646 | 0.0002494 | 0.0046144 |
| Mst1r_j6    | 0.0650274 | 0 -1.79769e+308       | 0.0043358 |           | 1         |
| Camkv_j2    | 0.206194  | 0.0476024             | -2.11489  | 0.101043  | 0.393603  |
| Camkv_j3    | 0         | 0.065418 1.79769e+308 | 0.0793483 |           | 1         |
| Traip_j8    | 0.177928  | 0.0274959             | -2.69401  | 0.111696  | 0.415961  |
| Ip6k1_j5    | 0.0556277 | 0.062403              | 0.165812  | 0.898354  | 1         |
| Ip6k1_j11   | 0.0701094 | 0.0795564             | 0.18237   | 0.925654  | 1         |
| Ip6k1_j12   | 0.93733   | 0.617339              | 0         | 1         | 1         |
| Gmppb_j4    | 7.38986   | 3.74374               | 0         | 1         | 1         |
| Gmppb       | 10.0756   | 8.15653               | 0         | 1         | 1         |
| Rhoa_j3     | 0         | 0.27769               | 0         | 1         | 1         |
| Lamb2_j2    | 0.433211  | 0.415683              | 0         | 1         | 1         |
| Usp19_j4    | 3.01142   | 2.03931               | 0         | 1         | 1         |
| Usp19_j5    | 10.338    | 9.06755               | 0         | 1         | 1         |
| Impdh2_j5   | 0.0919835 | 0.0241588             | 0         | 1         | 1         |
| Nckipsd_j3  | 0.575343  | 0 -1.79769e+308       | 2.07E-07  | 1.02E-05  |           |
| Celsr3_j7   | 1.55618   | 1.52392               | 0         | 1         | 1         |
| Col7a1_j3   | 0.0914796 | 0.18393               | 1.00764   | 1         | 1         |
| Col7a1_j4   | 0.330924  | 0.368908              | 0.156763  | 0.723211  | 0.90144   |
| Col7a1_j11  | 0.538767  | 1.14857               | 1.09211   | 0.0535354 | 0.269413  |
| Ucn2        | 0.134896  | 0.245646              | 0.864733  | 0.225122  | 0.572335  |
| Nme6_j4     | 0.428287  | 0.464961              | 0.118533  | 0.83462   | 0.946855  |
| Mtap4_j6    | 45.5129   | 40.3375               | 0         | 1         | 1         |
| Smarcc1     | 9.55214   | 10.7564               | 0.171301  | 0.0787688 | 0.340413  |
| Scap_j2     | 10.9406   | 11.2936               | 0         | 1         | 1         |
| Kif9_j5     | 0.0587079 | 0 -1.79769e+308       | 0.0138233 |           | 1         |
| Kif9_j13    | 0.376974  | 0.441631              | 0.228376  | 0.609581  | 0.846264  |
| Setd2_j3    | 0.384173  | 0.841245              | 1.13077   | 1.31E-05  | 0.0003909 |
| Epm2aip1    | 0.166442  | 0.145524              | -0.193762 | 0.750769  | 0.913558  |
| Clasp2_j3   | 0.486353  | 0.296433              | 0         | 1         | 1         |
| Clasp2      | 1.71961   | 3.05655               | 0         | 1         | 1         |
| Clasp2_j6   | 8.05566   | 2.89171               | 0         | 1         | 1         |
| Susd5       | 0.176351  | 0.125097              | -0.495406 | 0.407772  | 0.728185  |
| Glb1_j1     | 7.92836   | 8.52957               | 0.10545   | 0.435674  | 0.746463  |
| Osbpl10_j3  | 4.75357   | 3.51205               | 0         | 1         | 1         |
| Osbpl10_j2  | 0.974213  | 0.63559               | 0         | 1         | 1         |
| Osbpl10_j10 | 3.11681   | 3.65241               | 0         | 1         | 1         |
| XLOC_034603 | 0.156644  | 0.0696248             | 0         | 1         | 1         |
| Golga4_j10  | 0.129217  | 0.0239325             | -2.43276  | 0.0291748 | 1         |
| Golga4_j12  | 5.9472    | 5.94681               | -9.58E-05 | 0.999698  | 0.999883  |
| Ctdspl_j2   | 0.475562  | 0.287034              | 0         | 1         | 1         |
| Vill_j6     | 0.0799139 | 0.0888727             | 0.153292  | 0.901337  | 1         |
| Vill_j12    | 0.194116  | 0.0407951             | -2.25045  | 0.137363  | 0.461064  |

|                  |            |           |              |           |           |
|------------------|------------|-----------|--------------|-----------|-----------|
| Vill_j14         | 0.0539177  | 0.0987473 | 0.872983     | 0.661447  | 1         |
| Dlec1_j7         | 0.100808   | 0.0764238 | -0.399512    | 0.711764  | 1         |
| Dlec1_j12        | 0.195141   | 0.156483  | -0.318515    | 0.662086  | 0.871836  |
| Acaa1a_j1        | 8.611      | 9.85245   | 0            | 1         | 1         |
| Acaa1a_j8        | 2.07088    | 1.30731   | 0            | 1         | 1         |
| XLOC_034614      | 0          | 0.115042  | 0            | 1         | 1         |
| Exog_j3          | 0.22398    | 0.0433808 | 0            | 1         | 1         |
| Ttc21a_j5        | 0.0256672  | 0.0567133 | 1.14376      | 0.447349  | 1         |
| Rpsa_j3          | 0.0750332  | 0.0926984 | 0            | 1         | 1         |
| Rpsa_j5          | 1.03192    | 1.06531   | 0            | 1         | 1         |
| Rpl14_j2         | 0.200224   | 0.286464  | 0            | 1         | 1         |
| Rpl14_j1         | 0.45017    | 0.260862  | 0            | 1         | 1         |
| Ctnnb1_j3        | 57.9571    | 66.2438   | 0            | 1         | 1         |
| Trak1_j1         | 2.13514    | 1.4603    | 0            | 1         | 1         |
| Trak1_j14        | 2.42129    | 2.28395   | 0            | 1         | 1         |
| Trak1_j13        | 2.2352     | 2.0725    | 0            | 1         | 1         |
| Deb1_j3          | 0.615551   | 0.520216  | -0.242765    | 0.377458  | 0.70922   |
| Deb1             | 1.53587    | 1.5468    | 0.0102314    | 0.951158  | 0.985865  |
| Nktr_j4          | 5.68915    | 6.27522   | 0.141452     | 0.183764  | 0.524378  |
| Nktr_j9          | 2.61019    | 2.60767   | -0.00139408  | 0.991899  | 0.997581  |
| Abhd5            | 10.4924    | 11.1062   | 0            | 1         | 1         |
| Abhd5_j3         | 0.0622517  | 0.12916   | 0            | 1         | 1         |
| XLOC_034644      | 0          | 0.0717351 | 1.79769e+308 | 0.0713811 | 1         |
| 9530059O14Rik_j1 | 0.0385505  | 0.0800268 | 1.05373      | 0.351168  | 1         |
| D9Ert402e_j1     | 0.00972873 | 0.17576   | 0            | 1         | 1         |
| Zfp167_j1        | 0.187369   | 0.15244   | -0.297636    | 0.546109  | 0.812874  |
| Kif15_j2         | 0.0914605  | 0.0969269 | 0.0837476    | 0.930268  | 1         |
| Tmem42_j1        | 0.122751   | 0.102701  | -0.257294    | 0.746397  | 1         |
| Tmem42           | 7.48845    | 6.57102   | -0.188549    | 0.300889  | 0.647316  |
| Tmem42_j2        | 3.93221    | 4.07673   | 0.0520708    | 0.846563  | 0.951509  |
| Exosc7           | 11.3968    | 12.0011   | 0.0745446    | 0.60815   | 0.84559   |
| Limd1_j1         | 0.325151   | 0.719804  | 1.1465       | 0.0002831 | 0.0050917 |
| Limd1_j2         | 0          | 0.106512  | 1.79769e+308 | 0.0050948 | 1         |
| XLOC_034654      | 0.0820853  | 0.127088  | 0.630635     | 0.545695  | 1         |
| Aasdhpt_j2       | 1.76344    | 1.63201   | -0.111737    | 0.6214    | 0.851669  |
| Aasdhpt_j3       | 6.16188    | 5.84397   | -0.0764234   | 0.572859  | 0.827318  |
| Gria4_j2         | 6.69015    | 6.11342   | 0            | 1         | 1         |
| Gria4_j3         | 0.594267   | 0         | 0            | 1         | 1         |
| Gria4            | 4.73164    | 3.00068   | 0            | 1         | 1         |
| Birc2_j2         | 1.07559    | 0.737463  | -0.544485    | 0.072692  | 0.324435  |
| AK129341_j1      | 0.119306   | 0.462059  | 0            | 1         | 1         |
| AK129341_j2      | 2.20279    | 1.81324   | 0            | 1         | 1         |
| AK129341_j4      | 0.927184   | 0.509289  | 0            | 1         | 1         |
| Arhgap42_j2      | 1.93253    | 2.82621   | 0            | 1         | 1         |
| Kdm4d            | 0.682491   | 0.496217  | -0.459837    | 0.114109  | 0.420249  |
| Amotl1_j3        | 0.0625991  | 0.0262215 | 0            | 1         | 1         |
| Amotl1_j2        | 0.814931   | 0.743179  | 0            | 1         | 1         |

|                  |           |             |               |           |           |
|------------------|-----------|-------------|---------------|-----------|-----------|
| 5830418K08Rik_j3 | 0.991237  | 1.08267     | 0.127285      | 0.432004  | 0.74396   |
| 5830418K08Rik_j7 | 0.152518  | 0.294601    | 0.949783      | 0.458622  | 0.761199  |
| Fat3_j2          | 2.62923   | 2.36046     | 0             | 1         | 1         |
| Naalad2_j4       | 0         | 0.0855712   | 1.79769e+308  | 0.0443682 | 1         |
| Zfp560           | 0.157709  | 0.194216    | 0.3004        | 0.54707   | 0.813394  |
| Zfp426_j1        | 1.09365   | 0.947189    | 0             | 1         | 1         |
| Zfp266_j2        | 0.20363   | 0.000367727 | 0             | 1         | 1         |
| Zfp266           | 0.85797   | 0.957809    | 0             | 1         | 1         |
| Fbxl12_j1        | 0.344621  | 0.570778    | 0             | 1         | 1         |
| Col5a3_j3        | 3.17825   | 6.41032     | 0             | 1         | 1         |
| Raver1_j4        | 9.63722   | 10.9637     | 0.18604       | 0.341867  | 0.681706  |
| Raver1           | 4.03686   | 3.25306     | -0.311436     | 0.0586262 | 0.284598  |
| Tyk2_j2          | 0.772883  | 1.44522     | 0             | 1         | 1         |
| Tyk2_j5          | 0.0817891 | 0.0404796   | 0             | 1         | 1         |
| Cdc37_j1         | 11.5043   | 14.6588     | 0.349594      | 0.0130712 | 0.104503  |
| Cdc37_j2         | 0.332898  | 0.217044    | -0.617091     | 0.262486  | 0.611578  |
| Kri1_j1          | 0.0283084 | 0.124907    | 2.14155       | 0.110436  | 1         |
| Dock6_j5         | 0.222283  | 0.169016    | 0             | 1         | 1         |
| Dock6_j6         | 0.179745  | 0.265951    | 0             | 1         | 1         |
| Rgl3_j11         | 0.244389  | 0.32206     | 0.398152      | 0.460572  | 0.762108  |
| Rgl3_j10         | 0.281294  | 0.264595    | -0.0882945    | 0.882104  | 0.962591  |
| Elavl3_j1        | 4.19466   | 11.4811     | 1.45264       | 0         | 0         |
| Zfp653_j2        | 1.19067   | 0.793754    | -0.585012     | 0.0199866 | 0.140761  |
| Zfp653_j1        | 0.385851  | 0.462929    | 0.262744      | 0.446105  | 0.75332   |
| Zfp810_j5        | 0.722287  | 0.717275    | 0             | 1         | 1         |
| Zfp810           | 0.964321  | 0.80826     | 0             | 1         | 1         |
| rp9_j1           | 0         | 0.0717784   | 1.79769e+308  | 0.214343  | 1         |
| Glb1l2_j1        | 0.322195  | 0.0316621   | -3.34711      | 0.0083225 | 0.0747414 |
| Ntm_j5           | 0.127124  | 0           | -1.79769e+308 | 0.0005771 | 1         |
| St14_j1          | 0.407186  | 0.255841    | -0.670438     | 0.389551  | 0.716696  |
| Aplp2_j4         | 42.9651   | 64.1352     | 0             | 1         | 1         |
| Aplp2            | 23.476    | 24.3167     | 0             | 1         | 1         |
| Tmem45b_j2       | 2.93852   | 2.09456     | -0.488442     | 0.109675  | 0.412055  |
| Tmem45b_j1       | 0.244315  | 0.254584    | 0.0594008     | 0.934183  | 0.979958  |
| St3gal4_j3       | 0.715757  | 0.922731    | 0             | 1         | 1         |
| St3gal4          | 3.98337   | 4.16162     | 0             | 1         | 1         |
| Dcps_j1          | 1.87368   | 1.73374     | 0             | 1         | 1         |
| Dcps             | 4.22918   | 4.65498     | 0             | 1         | 1         |
| Tirap_j1         | 0.206252  | 0.196246    | -0.0717488    | 0.889581  | 0.964965  |
| Foxred1_j4       | 0.212211  | 0.322516    | 0             | 1         | 1         |
| Foxred1_j5       | 0.238217  | 0.492198    | 0             | 1         | 1         |
| Foxred1_j6       | 0.72087   | 0.661807    | 0             | 1         | 1         |
| Foxred1_j7       | 0.990711  | 0.883022    | 0             | 1         | 1         |
| Fam118b_j2       | 13.2054   | 12.235      | 0             | 1         | 1         |
| Hyls1            | 1.94142   | 2.22904     | 0.199314      | 0.328708  | 0.671184  |
| Pknox2_j1        | 4.18654   | 4.71991     | 0             | 1         | 1         |
| Pknox2_j2        | 1.04228   | 0.000259729 | 0             | 1         | 1         |

|                  |            |             |               |           |          |
|------------------|------------|-------------|---------------|-----------|----------|
| Pknox2           | 8.7919     | 5.22016     | 0             | 1         | 1        |
| Slc37a2          | 0          | 0.123972    | 1.79769e+308  | 0.0007791 | 1        |
| Nrgn             | 0.359075   | 0.422354    | 0.234167      | 0.378758  | 0.710354 |
| Gramd1b_j10      | 0.329637   | 0.280021    | 0             | 1         | 1        |
| AK089373_j3      | 1.14112    | 1.26476     | 0.148419      | 0.535471  | 0.80631  |
| 4931429I11Rik_j1 | 0.486484   | 0.647951    | 0.413493      | 0.0812636 | 0.347085 |
| 4931429I11Rik_j5 | 2.1131     | 2.41389     | 0.191999      | 0.449927  | 0.755805 |
| Ubash3b_j1       | 26.7923    | 19.0457     | 0             | 1         | 1        |
| Sorl1_j1         | 3.87405    | 1.14385     | 0             | 1         | 1        |
| Tbcel_j1         | 0.36359    | 0.280442    | 0             | 1         | 1        |
| Grik4_j3         | 0.0745408  | 0.0435157   | 0             | 1         | 1        |
| Grik4_j4         | 3.59327    | 3.64775     | 0             | 1         | 1        |
| Hinfp_j4         | 0.00447462 | 0.332873    | 0             | 1         | 1        |
| Hinfp            | 0.0068294  | 0.961423    | 0             | 1         | 1        |
| Hmbs_j5          | 2.70506    | 2.91091     | 0.105808      | 0.564611  | 0.823408 |
| Vps11_j1         | 11.8615    | 12.5656     | 0             | 1         | 1        |
| Phldb1_j9        | 3.87354    | 5.6071      | 0             | 1         | 1        |
| Phldb1_j10       | 1.41979    | 1.50206     | 0             | 1         | 1        |
| Phldb1_j11       | 2.02604    | 2.51728     | 0             | 1         | 1        |
| Tmem25_j1        | 0.0455665  | 4.11043     | 0             | 1         | 1        |
| Tmem25_j2        | 20.6825    | 15.3465     | 0             | 1         | 1        |
| Mll1_j10         | 0.0620656  | 0.0225477   | 0             | 1         | 1        |
| Mll1_j11         | 0.152144   | 0.128279    | 0             | 1         | 1        |
| Atp5l_j1         | 2.61678    | 2.14909     | -0.284069     | 0.314355  | 0.658565 |
| Ube4a_j2         | 15.5685    | 11.7668     | 0             | 1         | 1        |
| Gm10684_j3       | 0          | 0.413278    | 0             | 1         | 1        |
| Gm10684_j4       | 0.539123   | 0           | 0             | 1         | 1        |
| Gm10684          | 0.453638   | 0.162195    | 0             | 1         | 1        |
| Cep164_j1        | 2.35611    | 2.07147     | -0.18575      | 0.489872  | 0.779639 |
| Cep164_j2        | 0.0681834  | 0           | -1.79769e+308 | 0.002807  | 1        |
| Cep164_j3        | 0.109688   | 0.188654    | 0.782328      | 0.141699  | 0.468253 |
| Rnf214_j1        | 4.0508     | 5.46169     | 0             | 1         | 1        |
| Rnf214           | 3.47026    | 2.37563     | 0             | 1         | 1        |
| Sidt2_j1         | 0.30432    | 1.02327     | 0             | 1         | 1        |
| Sidt2            | 1.2484     | 1.37322     | 0             | 1         | 1        |
| XLOC_034805      | 0.0819578  | 0.00271372  | -4.91653      | 0.466121  | 1        |
| XLOC_034806      | 0.297916   | 0.151746    | -0.973245     | 0.343543  | 0.683592 |
| XLOC_034807      | 0          | 0.0559748   | 1.79769e+308  | 0.0260235 | 1        |
| XLOC_034807      | 0.844118   | 0.64737     | -0.382855     | 0.0954656 | 0.381463 |
| Fam55b_j1        | 0.111002   | 0.0981029   | -0.178215     | 0.862865  | 1        |
| Fam55b           | 0.22791    | 0.312516    | 0.455466      | 0.428075  | 0.742047 |
| Fam55b           | 0.286175   | 0.000215591 | -10.3744      | 0.752999  | 0.91467  |
| XLOC_034809      | 0.498044   | 0.694151    | 0.478976      | 0.0564586 | 0.278053 |
| Rbm7_j1          | 0.564367   | 0.352076    | -0.680744     | 0.145139  | 0.472985 |
| Nnmt             | 0.0311503  | 0.176679    | 2.50381       | 0.464991  | 0.764951 |
| Ttc12_j2         | 1.61873    | 1.6417      | 0             | 1         | 1        |
| Ncam1_j1         | 5.76923    | 2.93838     | 0             | 1         | 1        |

|                  |           |           |               |           |           |
|------------------|-----------|-----------|---------------|-----------|-----------|
| Ncam1_j7         | 7.72667   | 10.3241   | 0             | 1         | 1         |
| Pts_j4           | 6.85877   | 8.42705   | 0             | 1         | 1         |
| Dlat_j2          | 15.9902   | 14.9012   | 0             | 1         | 1         |
| Dixdc1           | 0.380988  | 0.446891  | 0.230176      | 0.414476  | 0.732858  |
| 2310030G06Rik_j2 | 0.56943   | 0.571106  | 0.00423806    | 0.992703  | 0.997911  |
| 2310030G06Rik    | 0.188043  | 0.266715  | 0.504238      | 0.341327  | 0.681241  |
| Layn             | 0.181681  | 0.0806619 | -1.17145      | 0.114151  | 0.420315  |
| AK086943_j6      | 0         | 0.162979  | 1.79769e+308  | 0.0516584 | 0.26356   |
| AK086943_j7      | 0.0582014 | 0.0305851 | -0.928226     | 0.717479  | 1         |
| Fdx1             | 2.85058   | 3.68894   | 0.371954      | 0.229997  | 0.577072  |
| XLOC_034835      | 0.113447  | 0.0795515 | -0.512064     | 0.767034  | 1         |
| XLOC_034836      | 0.0727578 | 0.0753523 | 0.0505488     | 0.979352  | 1         |
| Atm_j3           | 0.203106  | 0.208846  | 0             | 1         | 1         |
| Cul5_j1          | 0.0551688 | 0.0120975 | -2.18915      | 0.14578   | 1         |
| Cul5_j4          | 0.330074  | 0.116238  | -1.50571      | 0.0037086 | 0.0406743 |
| XLOC_034841      | 0.1146    | 0.142993  | 0             | 1         | 1         |
| Dmxl2_j5         | 3.67289   | 3.84987   | 0             | 1         | 1         |
| XLOC_034847      | 0.172601  | 0.360983  | 1.06449       | 0.266414  | 0.615515  |
| XLOC_034849      | 69.4323   | 68.9356   | -0.0103574    | 0.908875  | 0.971253  |
| Neil1_j1         | 0         | 0.478273  | 1.79769e+308  | 0.0151687 | 0.115855  |
| Scamp5_j4        | 25.9551   | 24.5889   | 0             | 1         | 1         |
| Mpi_j2           | 25.8011   | 22.3582   | -0.206624     | 0.0407363 | 0.226551  |
| Csk_j1           | 2.03824   | 1.98858   | -0.0355792    | 0.842487  | 0.95025   |
| Islr2_j3         | 0.450093  | 0.158157  | -1.50886      | 0.0064549 | 0.0619057 |
| Pml_j4           | 0.426949  | 0.344495  | 0             | 1         | 1         |
| Pml              | 0.764878  | 0.417836  | 0             | 1         | 1         |
| Cd276_j1         | 0.31702   | 0.305759  | -0.0521827    | 0.930514  | 0.978738  |
| Cd276_j2         | 0.21358   | 0.430536  | 1.01136       | 0.0694008 | 0.315891  |
| Cd276_j3         | 0.249668  | 0.229502  | -0.121503     | 0.825285  | 0.943699  |
| Cd276_j4         | 0.34075   | 0.424925  | 0.318497      | 0.402823  | 0.726002  |
| Neo1_j7          | 0.845659  | 0.0958346 | 0             | 1         | 1         |
| Bbs4_j1          | 1.43936   | 2.20189   | 0             | 1         | 1         |
| Arih1_j1         | 14.6564   | 12.9224   | 0             | 1         | 1         |
| AK038653_j9      | 0.229247  | 0.109437  | -1.06681      | 0.178631  | 0.518168  |
| Lrrc49_j3        | 93.8651   | 46.8669   | -1.00202      | 0         | 0         |
| Kif23_j4         | 0.340772  | 0.487613  | 0.51693       | 0.432263  | 0.74419   |
| Kif23_j1         | 0.189254  | 0.0513711 | -1.8813       | 0.0957777 | 0.382115  |
| Paqr5_j1         | 0.0781592 | 0.0265868 | -1.55571      | 0.0744232 | 1         |
| Glce_j1          | 2.76591   | 2.90434   | 0             | 1         | 1         |
| XLOC_034892      | 0.121369  | 0.0315846 | -1.94211      | 0.34902   | 1         |
| Coro2b_j3        | 20.1645   | 20.7324   | 0             | 1         | 1         |
| Coro2b_j4        | 3.95824   | 1.90129   | 0             | 1         | 1         |
| Pias1_j3         | 0.1372    | 0         | 0             | 1         | 1         |
| Map2k5_j4        | 0.0510709 | 0         | -1.79769e+308 | 0.12178   | 1         |
| Map2k5           | 6.02771   | 5.476     | -0.138488     | 0.367869  | 0.701188  |
| Map2k5_j5        | 4.36845   | 4.30933   | -0.0196562    | 0.91013   | 0.971581  |
| Smad3_j2         | 0.241227  | 0.616499  | 1.35371       | 0.0002299 | 0.0043016 |

|                  |           |           |              |           |           |
|------------------|-----------|-----------|--------------|-----------|-----------|
| Smad3            | 0.261546  | 0.343698  | 0.394078     | 0.254528  | 0.602758  |
| Smad6_j2         | 0         | 0.086509  | 1.79769e+308 | 0.0829648 | 1         |
| Zwilch           | 0.891672  | 0.83904   | -0.0877746   | 0.747902  | 0.912311  |
| Map2k1_j1        | 34.9149   | 32.397    | 0            | 1         | 1         |
| Trip4_j3         | 0.357871  | 0.245444  | -0.544047    | 0.162568  | 0.498014  |
| XLOC_034916      | 0.230846  | 0.150582  | -0.616383    | 0.510955  | 0.79135   |
| Usp3_j3          | 0.462568  | 0.460793  | 0            | 1         | 1         |
| Tpm1             | 4.62809   | 8.70436   | 0.911322     | 1.91E-07  | 9.45E-06  |
| Tln2_j3          | 9.65264   | 7.43855   | 0            | 1         | 1         |
| Tln2_j2          | 3.82554   | 2.7446    | 0            | 1         | 1         |
| Rnf111_j2        | 0.126203  | 0.192923  | 0            | 1         | 1         |
| Cgnl1_j6         | 3.70509   | 3.69404   | 0            | 1         | 1         |
| Tcf12_j1         | 3.01709   | 2.744     | 0            | 1         | 1         |
| Tcf12_j2         | 0.397823  | 0.384803  | 0            | 1         | 1         |
| Tcf12            | 0.768162  | 1.41326   | 0            | 1         | 1         |
| tsec-1           | 0.907587  | 0.472215  | -0.94259     | 0.0029891 | 0.0343447 |
| Pigb             | 1.96233   | 1.51244   | 0            | 1         | 1         |
| Unc13c_j5        | 3.02632   | 3.36649   | 0            | 1         | 1         |
| Mapk6            | 0.460534  | 1.07625   | 0            | 1         | 1         |
| Scg3_j4          | 168.296   | 167.335   | 0            | 1         | 1         |
| 2310046A06Rik_j1 | 0.42928   | 0.649265  | 0.596889     | 0.450527  | 0.756158  |
| 2310046A06Rik_j8 | 0.54905   | 0.746406  | 0.443022     | 0.560502  | 0.821119  |
| 2310046A06Rik_j9 | 0.342631  | 0.195474  | -0.809682    | 0.352093  | 0.689187  |
| Fbxo9_j3         | 15.062    | 13.8109   | -0.125112    | 0.417192  | 0.734301  |
| Gsta2_j1         | 0.331472  | 0.271923  | -0.285691    | 0.639158  | 0.860322  |
| Ooep_j1          | 0.385086  | 0.329084  | -0.226726    | 0.728494  | 0.903756  |
| Eef1a1           | 300.343   | 375.592   | 0.322555     | 0.0002894 | 0.0051857 |
| Tmem30a_j1       | 21.0568   | 13.9112   | 0            | 1         | 1         |
| Filip1_j5        | 0         | 0.0951657 | 1.79769e+308 | 0.010699  | 1         |
| Phip_j8          | 0.11435   | 0.194843  | 0            | 1         | 1         |
| Hmgn3_j4         | 1.38853   | 1.88525   | 0            | 1         | 1         |
| Hmgn3_j5         | 2.46259   | 2.85691   | 0            | 1         | 1         |
| Ibtk_j6          | 0.578844  | 0.919121  | 0            | 1         | 1         |
| Ube2cbp_j7       | 0         | 0.0595516 | 1.79769e+308 | 0.116975  | 1         |
| Me1_j4           | 0.238008  | 0.273189  | 0.198893     | 0.732713  | 0.905691  |
| Me1_j1           | 5.69155   | 6.50756   | 0.193296     | 0.191586  | 0.533749  |
| Snap91_j1        | 21.6783   | 19.0703   | 0            | 1         | 1         |
| Snap91_j2        | 13.878    | 7.06819   | 0            | 1         | 1         |
| Snap91_j3        | 12.4358   | 6.58529   | 0            | 1         | 1         |
| Snap91_j11       | 7.63617   | 6.44571   | 0            | 1         | 1         |
| Syncrip_j1       | 1.10878   | 0.169348  | 0            | 1         | 1         |
| 2810026P18Rik    | 3.10747   | 3.75306   | 0.272328     | 0.247967  | 0.595267  |
| Gm2382_j4        | 2.22311   | 2.07385   | -0.100269    | 0.830593  | 0.945436  |
| AF529169         | 1.09313   | 0.493147  | 0            | 1         | 1         |
| Tmed3_j2         | 0.371853  | 0.540101  | 0.538496     | 0.404659  | 0.726779  |
| Ankrd34c_j2      | 0.604288  | 0.312864  | -0.949702    | 0.0051943 | 0.0521987 |
| Trpc1            | 0.0957676 | 0.0664897 | 0            | 1         | 1         |

|             |           |                        |             |           |           |
|-------------|-----------|------------------------|-------------|-----------|-----------|
| Pls1_j2     | 0.181062  | 0.174553               | 0           | 1         | 1         |
| Atp1b3_j1   | 168.285   | 163.794                | 0           | 1         | 1         |
| Rnf7        | 0.111112  | 0.191146               | 0.782661    | 0.491214  | 0.780398  |
| Zbtb38_j5   | 0.0890527 | 0.207343               | 0           | 1         | 1         |
| Zbtb38_j2   | 0.975676  | 0.0764863              | 0           | 1         | 1         |
| Clstn2_j1   | 3.18751   | 2.94915                | 0           | 1         | 1         |
| Mras_j1     | 1.87504   | 1.04524                | -0.843087   | 0.0010138 | 0.0144661 |
| Armc8       | 7.04838   | 6.36715                | -0.146644   | 0.250514  | 0.598226  |
| Nck1        | 2.8711    | 2.53814                | 0           | 1         | 1         |
| Tmem22_j2   | 0.171654  | 0 -1.79769e+308        | 0.0100765   | 0.086004  |           |
| Cep63_j3    | 0.378074  | 0.604607               | 0           | 1         | 1         |
| Cdv3_j7     | 5.09718   | 6.18438                | 0           | 1         | 1         |
| AK131742_j1 | 0.184986  | 0.054232               | -1.7702     | 0.271559  | 0.620436  |
| Uba5_j3     | 0.115215  | 0.0674751              | -0.771899   | 0.522266  | 1         |
| Uba5_j4     | 0.0890832 | 0 -1.79769e+308        | 0.0130809   | 1         |           |
| Dnajc13_j2  | 2.13454   | 2.27569                | 0           | 1         | 1         |
| Dnajc13     | 4.31074   | 3.18729                | 0           | 1         | 1         |
| Acpp        | 7.98025   | 6.93849                | 0           | 1         | 1         |
| Atp2c1      | 0.493971  | 0.485445               | -0.025117   | 0.943068  | 0.982807  |
| Ppm1m_j3    | 0.828875  | 0.712805               | -0.217648   | 0.591257  | 0.836932  |
| Acy1_j5     | 0.0522592 | 0.16412                | 1.65099     | 0.18891   | 0.530559  |
| Abhd14a_j1  | 3.11956   | 3.06372                | 0           | 1         | 1         |
| Parp3_j1    | 0.903277  | 1.05849                | 0           | 1         | 1         |
| Parp3_j2    | 0.702029  | 0.607581               | 0           | 1         | 1         |
| Rad54l2_j1  | 3.18608   | 3.66657                | 0.202648    | 0.113628  | 0.419374  |
| Rad54l2_j5  | 0         | 0.0568435 1.79769e+308 | 0.179572    | 1         |           |
| Dock3_j9    | 13.38     | 10.731                 | -0.318289   | 0.0039113 | 0.0422322 |
| Hemk1_j3    | 0.251747  | 0.286666               | 0.187398    | 0.800409  | 0.933471  |
| BY080835_j1 | 0         | 0.146388 1.79769e+308  | 0.0050834   | 1         |           |
| Sema3b      | 1.24805   | 1.12458                | -0.150296   | 0.652429  | 0.86684   |
| Rbm6_j7     | 2.44105   | 3.7365                 | 0.614186    | 0.0367966 | 0.21219   |
| Rbm6_j9     | 0.320854  | 0.593346               | 0.886958    | 0.0107385 | 0.0901908 |
| Apeh_j3     | 3.47669   | 5.4937                 | 0.660063    | 0.0075673 | 0.069825  |
| Apeh_j5     | 0.439689  | 0.437134               | -0.00840787 | 0.984793  | 0.995509  |
| Klhdc8b_j4  | 1.65315   | 2.07479                | 0           | 1         | 1         |
| Arih2_j6    | 3.23449   | 2.53345                | 0           | 1         | 1         |
| XLOC_035067 | 0.227742  | 0.169009               | -0.430298   | 0.578242  | 0.830242  |
| Atrip_j4    | 3.42941   | 4.65998                | 0.442363    | 0.007747  | 0.0709858 |
| Atrip_j5    | 0.607933  | 0.0981945              | -2.6302     | 1.44E-06  | 5.68E-05  |
| Ccdc72_j6   | 3.8354    | 5.34046                | 0           | 1         | 1         |
| Dhx30_j2    | 15.2997   | 16.4197                | 0           | 1         | 1         |
| Nradd_j1    | 0.672077  | 0.973419               | 0           | 1         | 1         |
| Nbeal2_j7   | 0.353418  | 0.443808               | 0           | 1         | 1         |
| Nbeal2_j6   | 0.523395  | 0.790225               | 0           | 1         | 1         |
| Nbeal2_j8   | 0         | 0.0754169              | 0           | 1         | 1         |
| Arpp21_j1   | 1.6516    | 1.65746                | 0.00511105  | 0.985355  | 0.995689  |
| Arpp21_j2   | 0         | 0.0578589 1.79769e+308 | 0.0510159   | 1         |           |

|                  |             |                       |            |           |           |
|------------------|-------------|-----------------------|------------|-----------|-----------|
| Fbxl2_j3         | 3.49593     | 3.12833               | 0          | 1         | 1         |
| Cnot10_j1        | 4.64273     | 5.00282               | 0          | 1         | 1         |
| Cnot10           | 6.99406     | 6.35828               | 0          | 1         | 1         |
| Stt3b_j1         | 34.3279     | 33.664                | -0.028174  | 0.75961   | 0.91718   |
| Tgfbr2_j1        | 4.13238     | 5.00788               | 0          | 1         | 1         |
| Rbms3_j6         | 1.07034     | 1.0093                | 0          | 1         | 1         |
| Plcd1_j6         | 0.756114    | 1.03431               | 0          | 1         | 1         |
| Scn10a_j9        | 19.7036     | 16.7967               | -0.230279  | 0.0216198 | 0.148707  |
| XLOC_035113      | 0.287215    | 0.376283              | 0.389684   | 0.463872  | 0.764346  |
| Scn11a_j4        | 19.4149     | 16.1767               | -0.263242  | 0.0056226 | 0.0555414 |
| Gorasp1_j1       | 0.0715292   | 3.1822                | 0          | 1         | 1         |
| Ulk4_j2          | 0.151493    | 0 -1.79769e+308       | 0.0711668  | 0.320744  |           |
| Ulk4_j3          | 0.0776424   | 0 -1.79769e+308       | 0.0819483  | 1         |           |
| Ulk4_j5          | 0           | 0.105065 1.79769e+308 | 0.0651785  | 1         |           |
| Sec22c_j5        | 0.596293    | 0.312228              | 0          | 1         | 1         |
| Hhatl            | 15.1239     | 8.91066               | -0.763224  | 5.51E-09  | 4.06E-07  |
| Higd1a           | 1.04838     | 0.990981              | -0.0812315 | 0.779341  | 0.925607  |
| Gm9790_j2        | 15.2585     | 13.9431               | -0.130063  | 0.281147  | 0.629634  |
| Ano10_j1         | 5.78645     | 7.74985               | 0          | 1         | 1         |
| Zdhhc3_j2        | 1.41806     | 1.12027               | -0.340064  | 0.0802942 | 0.344616  |
| GODZ             | 1.3068      | 1.53043               | 0.227898   | 0.214642  | 0.560036  |
| Lztfl1_j4        | 1.95343     | 1.75597               | -0.153739  | 0.479199  | 0.773541  |
| Lztfl1_j6        | 0.56631     | 0.325855              | -0.797361  | 0.171122  | 0.507955  |
| Fyco1_j6         | 0.000146051 | 0.0567712             | 8.60254    | 0.670854  | 1         |
| Alkbh8_j3        | 0.322535    | 0.57171               | 0          | 1         | 1         |
| 8430410K20Rik_j2 | 13.8053     | 13.8028               | 0          | 1         | 1         |
| Pdgfd            | 0.359833    | 0.0564952             | -2.67113   | 0.0027317 | 0.0320372 |
| Mmp8_j1          | 0.186692    | 0.0985416             | -0.921852  | 0.170112  | 0.507178  |
| XLOC_034134      | 0.125044    | 0.136718              | 0.128777   | 0.841333  | 1         |
| Fam76b_j2        | 0.140707    | 0.0396149             | 0          | 1         | 1         |
| Fam76b           | 0.279178    | 0.154101              | 0          | 1         | 1         |
| Cwc15_j1         | 0.524118    | 0.730178              | 0.478357   | 0.547452  | 0.813664  |
| 2200002K05Rik_j1 | 1.99475     | 1.79762               | 0          | 1         | 1         |
| 2200002K05Rik_j2 | 2.3604      | 4.06714               | 0          | 1         | 1         |
| Zfp317_j5        | 0.107674    | 0.165122              | 0          | 1         | 1         |
| Zfp317_j7        | 1.37982     | 0.653752              | 0          | 1         | 1         |
| Zfp317_j6        | 0.171412    | 0.120999              | 0          | 1         | 1         |
| Ubl5_j1          | 2.35059     | 2.5587                | 0          | 1         | 1         |
| A230050P20Rik_j2 | 0.0744322   | 0 -1.79769e+308       | 0.0313239  | 1         |           |
| Icam1_j1         | 0.243103    | 0.166895              | -0.542622  | 0.390899  | 0.717624  |
| Icam1            | 0.190588    | 0.587549              | 1.62425    | 8.57E-05  | 0.0018791 |
| Slc44a2_j3       | 30.0789     | 32.3382               | 0.104485   | 0.256867  | 0.60573   |
| Slc44a2_j4       | 35.8227     | 45.796                | 0.354346   | 0.000228  | 0.0042785 |
| Ilf3             | 0.863147    | 0.218447              | 0          | 1         | 1         |
| Qtrt1_j5         | 2.24364     | 2.7909                | 0.31489    | 0.229214  | 0.576313  |
| Smarca4_j3       | 0.151799    | 0.0187817             | 0          | 1         | 1         |
| Prkcsh           | 2.63644     | 1.69393               | -0.63822   | 0.0219281 | 0.150201  |



|                  |           |            |               |           |           |
|------------------|-----------|------------|---------------|-----------|-----------|
| 9530077C05Rik_j1 | 0.543978  | 0.536234   | -0.0206847    | 0.969974  | 0.99148   |
| Bbs9_j2          | 0.254516  | 0          | -1.79769e+308 | 3.23E-07  | 1.51E-05  |
| Bbs9_j8          | 2.21021   | 2.15798    | -0.0345035    | 0.896115  | 0.966989  |
| Bmper_j2         | 0.617702  | 0.860561   | 0             | 1         | 1         |
| Bmper_j3         | 1.38018   | 0.953546   | 0             | 1         | 1         |
| Eepd1_j3         | 24.5503   | 21.3199    | 0             | 1         | 1         |
| Ncapd3           | 1.00727   | 0.900576   | -0.16153      | 0.249765  | 0.597201  |
| Opcml_j8         | 0.0503455 | 0.0216748  | -1.21585      | 0.361945  | 1         |
| Zbtb44_j1        | 0.347676  | 0.493323   | 0.504788      | 0.165011  | 0.501328  |
| Prdm10_j9        | 0.201693  | 0.337357   | 0.742114      | 0.0408005 | 0.226831  |
| Nfrkb            | 0.717023  | 0.740903   | 0.0472667     | 0.855379  | 0.954239  |
| Arhgap32_j1      | 0.765716  | 0.517295   | -0.565822     | 0.0126215 | 0.101894  |
| Ets1_j4          | 0.116512  | 0          | 0             | 1         | 1         |
| Kirrel3_j7       | 0.984636  | 0.863071   | 0             | 1         | 1         |
| Fez1_j5          | 82.2961   | 74.0342    | 0             | 1         | 1         |
| XLOC_034212      | 0.0257773 | 0.0597605  | 1.21309       | 0.339394  | 1         |
| XLOC_034212      | 0         | 0.0740769  | 1.79769e+308  | 0.0810802 | 1         |
| Robo4_j5         | 0.925394  | 0.00228063 | -8.66449      | 0.132209  | 0.452447  |
| Esam_j1          | 0.320013  | 0.38981    | 0.284641      | 0.33104   | 0.672787  |
| Esam_j5          | 0.211753  | 0.150109   | -0.496367     | 0.394368  | 0.719811  |
| Vwa5a_j3         | 0.785849  | 1.29999    | 0.726176      | 2.15E-05  | 0.0005877 |
| Zfp202_j4        | 0.142168  | 0.0327034  | -2.12009      | 0.0840865 | 0.353808  |
| XLOC_034229      | 0.338874  | 0.212171   | -0.675523     | 0.0946598 | 0.379341  |
| AK014147_j5      | 0.229889  | 0          | -1.79769e+308 | 1.26E-05  | 0.0003777 |
| Gm16322_j1       | 0.134061  | 0.231469   | 0.787931      | 0.0324782 | 0.195798  |
| XLOC_034236      | 0.129532  | 0.0736468  | -0.814617     | 0.394847  | 1         |
| Mcam_j2          | 4.82797   | 4.71148    | 0             | 1         | 1         |
| Mcam_j5          | 27.2698   | 27.1058    | 0             | 1         | 1         |
| Slc37a4_j7       | 0.540077  | 0.335832   | -0.685424     | 0.181149  | 0.521088  |
| Bcl9l_j1         | 0         | 0.128089   | 0             | 1         | 1         |
| Bcl9l_j5         | 1.17366   | 1.37276    | 0             | 1         | 1         |
| Ddx6             | 0.751475  | 0          | -1.79769e+308 | 1.39E-21  | 4.04E-19  |
| Ddx6             | 0.154219  | 0          | -1.79769e+308 | 1.56E-06  | 6.07E-05  |
| XLOC_034255      | 0.125213  | 0.109493   | 0             | 1         | 1         |
| Ift46_j3         | 11.0358   | 8.44419    | 0             | 1         | 1         |
| Ift46_j5         | 2.24885   | 1.9631     | 0             | 1         | 1         |
| Scn2b_j1         | 0.196949  | 0.106725   | 0             | 1         | 1         |
| Scn4b_j4         | 6.84075   | 3.48214    | 0             | 1         | 1         |
| Scn4b_j8         | 0.157676  | 0.0709236  | 0             | 1         | 1         |
| Dscaml1_j2       | 0.0607318 | 0.0693945  | 0.192369      | 0.849059  | 1         |
| Dscaml1_j6       | 0.191803  | 0.0959238  | -0.999664     | 0.382063  | 0.712185  |
| Sik3_j1          | 0.134992  | 0.194071   | 0             | 1         | 1         |
| Sik3_j4          | 1.46722   | 0.740502   | 0             | 1         | 1         |
| Zfp259_j2        | 1.99743   | 2.72883    | 0.450137      | 0.279041  | 0.627737  |
| Bud13_j1         | 0.0990875 | 0.0272779  | -1.86097      | 0.225172  | 1         |
| Cadm1            | 4.18414   | 3.02014    | 0             | 1         | 1         |
| Cadm1_j2         | 10.7121   | 8.32693    | 0             | 1         | 1         |

|                  |           |                 |             |           |           |
|------------------|-----------|-----------------|-------------|-----------|-----------|
| Cadm1_j1         | 5.71468   | 3.90477         | 0           | 1         | 1         |
| Zw10_j3          | 1.03449   | 0.958532        | -0.110015   | 0.823889  | 0.943114  |
| Tmprss5_j1       | 1.03995   | 1.10481         | 0.0872897   | 0.803826  | 0.934948  |
| Tmprss5_j5       | 1.01944   | 1.29048         | 0.340125    | 0.245532  | 0.592921  |
| Tmprss5_j10      | 0.927672  | 0.717457        | -0.370722   | 0.422922  | 0.738606  |
| Fdxacb1_j1       | 1.43579   | 1.33238         | -0.107835   | 0.642246  | 0.862006  |
| Alg9_j2          | 3.08389   | 3.8995          | 0.338538    | 0.0499142 | 0.258155  |
| XLOC_034289      | 0.0741153 | 0.0694175       | -0.0944721  | 0.949857  | 1         |
| 4930550C14Rik_j6 | 3.80E-05  | 0.0772656       | 10.9907     | 0.982478  | 1         |
| 4930550C14Rik_j5 | 0.0675795 | 0.0388336       | -0.799282   | 0.700073  | 1         |
| Npat             | 1.89044   | 1.9155          | 0.0190001   | 0.89493   | 0.966853  |
| Npat_j2          | 0.544044  | 0.489835        | -0.151426   | 0.606893  | 0.845186  |
| Slc35f2_j3       | 2.1945    | 1.20085         | 0           | 1         | 1         |
| Idh3a_j2         | 32.0112   | 30.7153         | 0           | 1         | 1         |
| Ireb2_j5         | 1.39854   | 0.360344        | 0           | 1         | 1         |
| Psm4_j6          | 0.772363  | 0.691645        | -0.159247   | 0.638164  | 0.859943  |
| Ube2q2_j1        | 0.154357  | 0.0805378       | -0.938537   | 0.259801  | 0.608517  |
| Ube2q2_j2        | 0.100264  | 0.260819        | 1.37925     | 0.0197947 | 0.139854  |
| Al118078_j1      | 0.179409  | 0.0242166       | -2.88918    | 0.0678145 | 0.311748  |
| Cspg4_j1         | 0.189167  | 0.058639        | -1.68973    | 0.0048353 | 0.0494268 |
| Man2c1_j6        | 9.15178   | 9.76569         | 0           | 1         | 1         |
| Man2c1_j8        | 1.95157   | 1.83333         | 0           | 1         | 1         |
| Ulk3_j2          | 0.381049  | 0.462336        | 0.278966    | 0.575037  | 0.828142  |
| Ulk3_j1          | 0.506939  | 0.138929        | -1.86747    | 0.0384115 | 0.218048  |
| Ecd3_j1          | 1.44444   | 1.37651         | -0.0694909  | 0.642285  | 0.862006  |
| Stra6_j1         | 0.27815   | 0.572051        | 1.04028     | 0.0078532 | 0.0715826 |
| Stra6_j6         | 0.129617  | 0 -1.79769e+308 | 0.0006063   | 0.0006063 | 1         |
| XLOC_034335      | 0.199365  | 0.166838        | -0.256964   | 0.62125   | 0.851543  |
| Stoml1_j3        | 2.17121   | 0.001421        | -10.5774    | 0.285888  | 0.634672  |
| Hcn4_j1          | 2.49314   | 2.54429         | 0           | 1         | 1         |
| Adpgk_j1         | 4.48979   | 5.40473         | 0.267574    | 0.126052  | 0.442123  |
| Hexa_j2          | 5.04339   | 7.07548         | 0           | 1         | 1         |
| Parp6_j2         | 4.95202   | 4.10717         | 0           | 1         | 1         |
| Myo9a_j2         | 3.60989   | 2.87432         | 0           | 1         | 1         |
| Uaca             | 2.47348   | 2.0106          | 0           | 1         | 1         |
| Uaca_j9          | 0.179841  | 0               | 0           | 1         | 1         |
| Tle3_j1          | 0.0882112 | 0.215417        | 0           | 1         | 1         |
| Cln6_j1          | 5.74145   | 5.61327         | -0.0325739  | 0.864364  | 0.956828  |
| AK039256_j3      | 0.0676488 | 0 -1.79769e+308 | 0.0754506   | 0.0754506 | 1         |
| AK039256_j2      | 0.0685378 | 0 -1.79769e+308 | 0.0729559   | 0.0729559 | 1         |
| AK039256_j4      | 0.0829747 | 0.0615275       | -0.431441   | 0.764312  | 1         |
| Aagab_j2         | 14.4839   | 15.0724         | 0.0574612   | 0.592437  | 0.837865  |
| Rpl4_j3          | 0.61404   | 0.339118        | 0           | 1         | 1         |
| Megf11_j5        | 1.19314   | 0.271457        | -2.13596    | 1.33E-15  | 2.89E-13  |
| Igdcc4_j3        | 0.116363  | 0.01948         | 0           | 1         | 1         |
| Pdcd7_j1         | 7.59705   | 7.59989         | 0.000538705 | 0.99771   | 0.999228  |
| Gm514_j4         | 0.0534253 | 0 -1.79769e+308 | 0.0304335   | 0.0304335 | 1         |

|             |           |                 |             |           |           |
|-------------|-----------|-----------------|-------------|-----------|-----------|
| Gm514_j5    | 0.0800282 | 0.0241782       | -1.7268     | 0.269313  | 1         |
| Mtfmt_j2    | 3.24387   | 3.32288         | 0.0347207   | 0.879412  | 0.961516  |
| Csnk1g1_j4  | 0.329857  | 0.142108        | -1.21485    | 0.0054518 | 0.0541942 |
| Herc1_j1    | 0.905774  | 0.64182         | 0           | 1         | 1         |
| Vps13c_j1   | 1.56544   | 0.905229        | -0.790215   | 2.32E-07  | 1.13E-05  |
| Vps13c_j7   | 1.29136   | 0.215561        | -2.58272    | 1.83E-06  | 6.99E-05  |
| Narg2_j1    | 0.304344  | 0.412338        | 0.438126    | 0.252508  | 0.600511  |
| Narg2_j9    | 0.128164  | 0 -1.79769e+308 |             | 0.0206789 | 1         |
| Aldh1a2_j1  | 0.0634769 | 0.0395089       | -0.684052   | 0.641947  | 1         |
| Rfx7_j2     | 2.72062   | 2.48167         | -0.132626   | 0.306337  | 0.651661  |
| Nedd4       | 65.6484   | 59.9207         | 0           | 1         | 1         |
| Ccpg1       | 4.33371   | 3.50572         | 0           | 1         | 1         |
| Ccpg1_j2    | 7.58071   | 6.92684         | 0           | 1         | 1         |
| BC031353_j1 | 0.76922   | 0.317575        | 0           | 1         | 1         |
| Arpp19      | 8.49653   | 7.1688          | 0           | 1         | 1         |
| Bmp5_j1     | 0.347659  | 0.587394        | 0.756656    | 0.0677341 | 0.311526  |
| Hmgcl1_j3   | 0.676455  | 0.602428        | 0           | 1         | 1         |
| Elovl5_j4   | 0.651669  | 0 -1.79769e+308 |             | 0.0002966 | 0.0052953 |
| AK050586_j4 | 0.122826  | 0.0377302       | -1.70283    | 0.200408  | 1         |
| Mto1_j1     | 1.71406   | 1.70625         | -0.00658684 | 0.97932   | 0.993977  |
| Senp6_j3    | 0.0747551 | 1.28354         | 0           | 1         | 1         |
| Senp6       | 4.46802   | 1.71814         | 0           | 1         | 1         |
| Myo6_j13    | 1.11982   | 1.3254          | 0.243163    | 0.282752  | 0.631354  |
| XLOC_034443 | 0.160628  | 0 -1.79769e+308 |             | 0.0121847 | 0.0993548 |
| Sh3bgrl2_j1 | 16.3527   | 12.448          | -0.393609   | 0.0208574 | 0.145153  |
| Sh3bgrl2_j3 | 0.149475  | 0.080387        | -0.894868   | 0.380759  | 0.711587  |
| Ttk_j1      | 0.049751  | 0.0296466       | -0.746859   | 0.779888  | 1         |
| Bckdhb      | 7.84531   | 6.12431         | 0           | 1         | 1         |
| Cyb5r4_j5   | 4.93831   | 5.19415         | 0.072869    | 0.70925   | 0.894136  |
| XLOC_034461 | 0.133497  | 0.077703        | -0.780767   | 0.525795  | 1         |
| XLOC_034463 | 0.200274  | 0.0487203       | -2.03938    | 0.28034   | 0.629058  |
| Bcl2a1a     | 0.200929  | 0.304649        | 0.600463    | 0.359903  | 0.695038  |
| Rasgrf1_j2  | 0.10744   | 0.205544        | 0           | 1         | 1         |
| Adamts7_j7  | 0.423821  | 0.327419        | -0.372318   | 0.24742   | 0.594944  |
| Adamts7_j6  | 0.0655152 | 0 -1.79769e+308 |             | 0.0016276 | 1         |
| Adamts7_j15 | 0.145504  | 0.188109        | 0.370509    | 0.58501   | 0.833854  |
| Plscr2_j1   | 1.48535   | 1.52183         | 0.0350007   | 0.92008   | 0.974938  |
| Plscr2_j2   | 0.790538  | 0.994573        | 0.331244    | 0.509526  | 0.790813  |
| Slc9a9_j3   | 1.79286   | 0.605621        | 0           | 1         | 1         |
| XLOC_034483 | 0.133458  | 0.138563        | 0.0541635   | 0.946703  | 1         |
| Pcolce2     | 16.9517   | 16.2486         | -0.061113   | 0.583558  | 0.833132  |
| Xrn1_j3     | 0.146745  | 0.210958        | 0           | 1         | 1         |
| Xrn1_j1     | 0.279156  | 0.0693953       | 0           | 1         | 1         |
| Tfdp2_j6    | 0.425252  | 0.0738481       | 0           | 1         | 1         |
| Tfdp2_j2    | 1.33302   | 1.22341         | 0           | 1         | 1         |
| XLOC_034491 | 0.295985  | 0.223092        | 0           | 1         | 1         |
| AK089981_j2 | 0.109929  | 0.133577        | 0.281098    | 0.689575  | 1         |

|             |           |                 |            |           |           |
|-------------|-----------|-----------------|------------|-----------|-----------|
| Nmnat3      | 0.169109  | 0.040408        | -2.06524   | 0.0960832 | 0.382758  |
| Copb2_j2    | 20.2962   | 23.2965         | 0.198903   | 0.103746  | 0.399481  |
| Cep70       | 0.176259  | 0.227407        | 0.367581   | 0.536556  | 0.80697   |
| Cep70_j4    | 0.364245  | 0 -1.79769e+308 |            | 2.21E-05  | 0.0006002 |
| Dzip1l      | 0.0904075 | 0.0220087       | -2.03837   | 0.104898  | 1         |
| Stag1       | 0.0960649 | 0.391069        | 0          | 1         | 1         |
| Stag1_j3    | 0.30171   | 0.117669        | 0          | 1         | 1         |
| Anapc13_j2  | 1.20618   | 0.759341        | 0          | 1         | 1         |
| Amotl2_j2   | 0.295693  | 0               | 0          | 1         | 1         |
| Slco2a1_j5  | 0.473541  | 0.558436        | 0.237902   | 0.510284  | 0.791044  |
| Rab6b_j5    | 35.6758   | 8.95525         | 0          | 1         | 1         |
| Topbp1_j1   | 0.784313  | 0.114685        | -2.77376   | 2.00E-07  | 9.85E-06  |
| Nphp3_j6    | 0.47602   | 0.483129        | 0.0213877  | 0.953278  | 0.986435  |
| Nphp3_j9    | 0.239205  | 0.0552922       | -2.1131    | 0.0335927 | 0.200268  |
| Cpne4_j6    | 1.36694   | 0.947671        | 0          | 1         | 1         |
| Mrpl3       | 8.13405   | 6.87956         | -0.241657  | 0.101034  | 0.393603  |
| Aste1_j2    | 0.457054  | 0.45905         | 0.00628508 | 0.98841   | 0.996486  |
| Aste1_j6    | 0.757901  | 0.765807        | 0.0149719  | 0.934514  | 0.979958  |
| Poc1a_j1    | 0.264344  | 0.409365        | 0.630968   | 0.194859  | 0.537245  |
| Pcbp4_j1    | 0.425021  | 0.415287        | 0          | 1         | 1         |
| Pcbp4_j6    | 83.2171   | 90.1873         | 0          | 1         | 1         |
| Cacna2d2_j5 | 2.08624   | 8.71E-05        | 0          | 1         | 1         |
| Mst1r_j7    | 0.609537  | 0.763123        | 0.3242     | 0.295677  | 0.642384  |
| Uba7_j1     | 0.254873  | 0.305513        | 0.261457   | 0.558776  | 0.82019   |
| Ip6k1_j7    | 0.0721473 | 0.0239923       | -1.58837   | 0.283427  | 1         |
| Gmppb_j1    | 0.149813  | 0               | 0          | 1         | 1         |
| Amt_j5      | 0.0938995 | 0.0595305       | 0          | 1         | 1         |
| Lamb2_j5    | 0.7427    | 0.473358        | 0          | 1         | 1         |
| Lamb2_j6    | 0.603231  | 0.713842        | 0          | 1         | 1         |
| Usp19_j10   | 12.8821   | 11.0578         | 0          | 1         | 1         |
| Usp19_j12   | 1.89698   | 1.83822         | 0          | 1         | 1         |
| Qars_j3     | 0.855381  | 0.69835         | 0          | 1         | 1         |
| Impdh2_j4   | 1.3918    | 1.47754         | 0          | 1         | 1         |
| Nckipsd_j1  | 0.130839  | 0 -1.79769e+308 |            | 0.005956  | 1         |
| Nckipsd_j2  | 0.874234  | 0.255593        | -1.77417   | 0.0029293 | 0.0338009 |
| Celsr3_j1   | 1.3033    | 1.29407         | 0          | 1         | 1         |
| Celsr3_j8   | 0.70055   | 1.13308         | 0          | 1         | 1         |
| Celsr3_j16  | 4.61301   | 4.96953         | 0          | 1         | 1         |
| Slc26a6     | 0.174208  | 0.0879808       | -0.98555   | 0.258678  | 0.607449  |
| Col7a1_j8   | 0.247608  | 0.190839        | -0.375704  | 0.597381  | 0.840279  |
| Pfkfb4_j1   | 0.308492  | 1.37149         | 2.15244    | 5.53E-13  | 8.21E-11  |
| Pfkfb4_j2   | 0.954027  | 0.889684        | -0.100737  | 0.816158  | 0.940221  |
| Shisa5_j1   | 31.4641   | 33.4482         | 0.0882218  | 0.401069  | 0.724485  |
| Ccdc51_j2   | 0.529253  | 0.352382        | 0          | 1         | 1         |
| Plxnb1_j1   | 0.32142   | 0.364337        | 0          | 1         | 1         |
| Plxnb1_j5   | 1.67706   | 2.29955         | 0          | 1         | 1         |
| Nme6_j2     | 1.68972   | 0.740198        | -1.1908    | 0.0093638 | 0.0816259 |

|             |           |           |               |           |           |
|-------------|-----------|-----------|---------------|-----------|-----------|
| Nme6        | 1.50519   | 1.11849   | -0.42839      | 0.29638   | 0.643089  |
| Cspg5       | 0.826602  | 0.624056  | -0.405517     | 0.317484  | 0.660796  |
| Scap        | 0.0887259 | 0.0264212 | 0             | 1         | 1         |
| Scap        | 0.242924  | 0.367108  | 0             | 1         | 1         |
| Kif9_j1     | 0.320651  | 0.216872  | -0.564156     | 0.242442  | 0.589952  |
| Kif9_j2     | 0.121057  | 0.0468932 | -1.36824      | 0.233573  | 1         |
| Kif9_j11    | 0.178605  | 0         | -1.79769e+308 | 7.02E-05  | 0.0015867 |
| Ccdc12_j1   | 3.11009   | 3.78146   | 0.281986      | 0.357324  | 0.693209  |
| Ccdc12_j2   | 0.428717  | 0.0994076 | -2.1086       | 0.131174  | 0.450868  |
| Myl3        | 0.610154  | 0.520764  | -0.228544     | 0.58257   | 0.832835  |
| Prss45_j1   | 0.185044  | 0.0926675 | -0.997732     | 0.19684   | 0.539685  |
| Als2cl_j9   | 0.057936  | 0         | -1.79769e+308 | 0.005908  | 1         |
| Als2cl_j13  | 0.086482  | 0.0167988 | -2.36404      | 0.118057  | 1         |
| Als2cl_j14  | 0.114443  | 0.0928422 | -0.301777     | 0.709979  | 1         |
| Ltf_j1      | 0.0832461 | 0         | -1.79769e+308 | 0.0081158 | 1         |
| Ltf         | 0.215852  | 0.225138  | 0.0607679     | 0.904376  | 0.96954   |
| Clasp2_j9   | 0.122391  | 0.0501086 | 0             | 1         | 1         |
| AK015855    | 0.110657  | 0.0863339 | -0.358101     | 0.761992  | 1         |
| Osbpl10_j6  | 0.530378  | 0         | 0             | 1         | 1         |
| XLOC_034603 | 0.158587  | 0.0507155 | 0             | 1         | 1         |
| XLOC_034603 | 0.177112  | 0.0540294 | 0             | 1         | 1         |
| Azi2_j1     | 9.83556   | 10.1184   | 0             | 1         | 1         |
| AK039053    | 0.139146  | 0.127749  | 0             | 1         | 1         |
| XLOC_034607 | 0.140068  | 0.0625263 | -1.16359      | 0.312128  | 0.65658   |
| Golga4_j9   | 2.37779   | 2.70158   | 0.184186      | 0.208663  | 0.552726  |
| Dlec1_j1    | 0.0475304 | 0.0221342 | -1.10258      | 0.448963  | 1         |
| Dlec1_j10   | 0.155283  | 0.110283  | -0.493689     | 0.591768  | 0.83732   |
| Acaa1a_j2   | 0.179154  | 0.255787  | 0             | 1         | 1         |
| XLOC_034614 | 0.219032  | 0.0931895 | 0             | 1         | 1         |
| Xylb_j2     | 0.729346  | 0.639438  | -0.189799     | 0.557433  | 0.819674  |
| Acvr2b_j4   | 0.102548  | 0.0391608 | -1.38881      | 0.162282  | 1         |
| Acvr2b_j6   | 0.0835703 | 0.0112327 | -2.89528      | 0.665463  | 1         |
| Exog        | 0.156954  | 0.191372  | 0             | 1         | 1         |
| Ttc21a_j3   | 0.130643  | 0.105218  | -0.312247     | 0.608323  | 1         |
| Rpsa_j2     | 7.92021   | 9.86802   | 0             | 1         | 1         |
| Myrip_j4    | 0.489209  | 0.263579  | 0             | 1         | 1         |
| Ctnnb1_j2   | 0.840986  | 0.0618616 | 0             | 1         | 1         |
| Trak1_j12   | 4.7291    | 4.36107   | 0             | 1         | 1         |
| XLOC_034635 | 0.189461  | 0.102486  | -0.886475     | 0.223848  | 0.571034  |
| Nktr_j5     | 0.151813  | 0         | -1.79769e+308 | 1.14E-11  | 1.37E-09  |
| Nktr_j6     | 0.539774  | 0.286353  | -0.914562     | 0.0005145 | 0.008334  |
| Fam198a_j1  | 0.712775  | 0.744711  | 0             | 1         | 1         |
| XLOC_034640 | 0.0663276 | 0.0620438 | 0             | 1         | 1         |
| Snrk_j1     | 5.00077   | 3.89407   | 0             | 1         | 1         |
| XLOC_034646 | 0.80126   | 1.03505   | 0.369361      | 0.057994  | 0.282571  |
| Zfp167_j3   | 0.0313342 | 0.170279  | 2.44209       | 0.003705  | 0.0406529 |
| Zfp167_j5   | 0.444711  | 0.324877  | -0.452972     | 0.242657  | 0.590089  |

|             |           |                       |           |           |           |
|-------------|-----------|-----------------------|-----------|-----------|-----------|
| XLOC_034649 | 0.17316   | 0.107455              | -0.688379 | 0.329648  | 0.671845  |
| Kif15_j8    | 0.19684   | 0.0602616             | -1.70771  | 0.208418  | 0.552377  |
| Exosc7_j1   | 0.927868  | 1.52867               | 0.720286  | 0.0439021 | 0.238536  |
| Lars2_j1    | 0.386553  | 0.294957              | -0.390163 | 0.358481  | 0.693858  |
| XLOC_034654 | 0.189048  | 0.150187              | -0.331994 | 0.511351  | 0.791501  |
| Gria4_j1    | 0.398163  | 0.152384              | 0         | 1         | 1         |
| Dync2h1_j5  | 0.16699   | 0.058333              | -1.51738  | 0.0708199 | 0.319869  |
| Dync2h1_j6  | 0.57334   | 0.410362              | -0.482494 | 1         | 1         |
| Dync2h1_j11 | 0.087778  | 0.0312084             | -1.49193  | 0.305646  | 1         |
| Birc2_j4    | 0.207051  | 0 -1.79769e+308       |           | 1.02E-05  | 0.0003147 |
| Birc3_j2    | 0.284645  | 0.166742              | -0.771541 | 0.130831  | 0.450359  |
| Birc3_j3    | 0.0801836 | 0 -1.79769e+308       |           | 0.0588282 | 1         |
| Yap1_j2     | 1.23025   | 1.33897               | 0         | 1         | 1         |
| Arhgap42_j3 | 0.55959   | 1.71571               | 0         | 1         | 1         |
| Cntn5_j1    | 0.0953953 | 0 -1.79769e+308       |           | 0.0055082 | 1         |
| Cntn5_j2    | 0.476746  | 0.187957              | -1.34282  | 0.0001794 | 0.0035084 |
| Fat3_j1     | 0.465825  | 0.376912              | 0         | 1         | 1         |
| Fat3_j6     | 0.100943  | 0                     | 0         | 1         | 1         |
| Naalad2     | 0.127871  | 4.62E-05              | -11.4339  | 0.919826  | 1         |
| Zfp558_j8   | 0.087459  | 0.0819481             | -0.093898 | 0.926384  | 1         |
| Zfp560_j1   | 0.312121  | 0.320591              | 0.0386301 | 0.923393  | 0.97612   |
| Zfp26_j2    | 0.374204  | 0.276892              | 0         | 1         | 1         |
| Zfp426_j4   | 1.23653   | 0.8368                | 0         | 1         | 1         |
| Zfp426      | 1.86837   | 1.80338               | 0         | 1         | 1         |
| Zfp426      | 2.94144   | 2.10401               | 0         | 1         | 1         |
| Zfp266_j1   | 3.02978   | 2.95375               | 0         | 1         | 1         |
| Col5a3_j10  | 2.78065   | 4.77179               | 0         | 1         | 1         |
| Col5a3      | 20.0495   | 39.9658               | 0         | 1         | 1         |
| Angptl6_j1  | 0.193995  | 0.195913              | 0.0141976 | 0.972428  | 0.991962  |
| Dnmt1_j1    | 2.30223   | 3.06186               | 0         | 1         | 1         |
| Tyk2_j6     | 0.803754  | 0.354531              | 0         | 1         | 1         |
| Yipf2_j3    | 0.289955  | 0.240431              | 0         | 1         | 1         |
| Yipf2_j2    | 0.43444   | 0.278023              | 0         | 1         | 1         |
| Yipf2_j4    | 0.247937  | 0.412694              | 0         | 1         | 1         |
| Spc24_j1    | 0.216468  | 0.0872094             | -1.3116   | 0.259972  | 0.608587  |
| Dock6_j7    | 2.48306   | 2.22517               | 0         | 1         | 1         |
| Dock6_j8    | 0.47799   | 0.662586              | 0         | 1         | 1         |
| Dock6_j2    | 8.54E-05  | 0.135307              | 0         | 1         | 1         |
| Epor_j1     | 0.153982  | 0.0770303             | -0.999263 | 0.293678  | 0.640505  |
| Rgl3_j7     | 0.380512  | 0.623884              | 0.713338  | 0.194208  | 0.536599  |
| Rgl3        | 0         | 0.209153 1.79769e+308 |           | 0.0007236 | 0.0110257 |
| Ecsit       | 2.02654   | 2.46603               | 0.283171  | 0.19521   | 0.537515  |
| Acp5        | 0.0837268 | 0 -1.79769e+308       |           | 0.0329879 | 1         |
| Acp5        | 0.155811  | 1.75E-05              | -13.1178  | 0.990007  | 0.996938  |
| Anln_j2     | 0.141488  | 0.138127              | -0.034688 | 0.944169  | 0.983317  |
| Adamts15_j2 | 0.415199  | 0.363108              | 0         | 1         | 1         |
| Adamts15_j4 | 1.09577   | 0.592028              | 0         | 1         | 1         |

|                  |             |                 |            |           |           |
|------------------|-------------|-----------------|------------|-----------|-----------|
| Aplp2_j1         | 0.126523    | 0               | 0          | 1         | 1         |
| A130066N16Rik_j1 | 0.137515    | 0.0887598       | -0.631612  | 0.486448  | 0.777646  |
| A130066N16Rik_j2 | 0.206685    | 0.0928196       | -1.15493   | 0.0822336 | 0.349391  |
| Tirap            | 0.63563     | 0.844083        | 0.409197   | 0.116887  | 0.425121  |
| Tirap_j5         | 0.185995    | 0.151135        | -0.299424  | 0.599095  | 0.841178  |
| Fam118b_j1       | 1.17293     | 1.124           | 0          | 1         | 1         |
| Chek1            | 0.0823373   | 0.0420272       | -0.970224  | 0.3987    | 1         |
| Pknox2_j6        | 0.175488    | 0               | 0          | 1         | 1         |
| Ccdc15_j6        | 0.134229    | 0 -1.79769e+308 |            | 0.0095628 | 1         |
| Ccdc15_j7        | 0.0622826   | 0.0289647       | -1.10453   | 0.446895  | 1         |
| Ccdc15_j8        | 0.15656     | 0.120701        | -0.375279  | 0.498902  | 0.7842    |
| Gramd1b_j2       | 4.4981      | 3.13595         | 0          | 1         | 1         |
| Gramd1b_j13      | 0.536164    | 0               | 0          | 1         | 1         |
| Gramd1b          | 4.21029     | 2.87811         | 0          | 1         | 1         |
| Gramd1b_j14      | 0.721485    | 0.039642        | 0          | 1         | 1         |
| Ubash3b_j7       | 0.794542    | 0               | 0          | 1         | 1         |
| Sc5d             | 7.61105     | 11.5956         | 0          | 1         | 1         |
| Tecta_j1         | 0.000138531 | 0.18257         | 10.364     | 0.622371  | 0.852322  |
| Tecta_j8         | 0.727197    | 1.18296         | 0.701987   | 0.0007095 | 0.0108443 |
| Grik4_j5         | 2.1873      | 2.35565         | 0          | 1         | 1         |
| Arhgef12_j1      | 0.968812    | 0.446197        | 0          | 1         | 1         |
| Arhgef12         | 1.5962      | 0.271654        | 0          | 1         | 1         |
| XLOC_034775      | 0.180801    | 0.0935529       | -0.950549  | 0.461802  | 0.762986  |
| XLOC_034775      | 0.478017    | 0 -1.79769e+308 |            | 1.08E-05  | 0.000331  |
| XLOC_034776      | 0.225378    | 0.0737568       | -1.6115    | 0.224157  | 0.571444  |
| XLOC_034776      | 0.0779559   | 0.0587894       | -0.407102  | 0.647686  | 1         |
| Gm10687_j1       | 1.40339     | 1.47594         | 0          | 1         | 1         |
| Nlrx1_j1         | 0.489242    | 0.533904        | 0          | 1         | 1         |
| Hinfp_j5         | 0.253243    | 0.208203        | 0          | 1         | 1         |
| Hinfp_j8         | 0.482735    | 0.322553        | 0          | 1         | 1         |
| Vps11            | 6.88238     | 6.09732         | 0          | 1         | 1         |
| Phldb1_j1        | 1.03876     | 0               | 0          | 1         | 1         |
| Phldb1_j6        | 0.080893    | 0               | 0          | 1         | 1         |
| Phldb1_j8        | 0.521957    | 0.339917        | 0          | 1         | 1         |
| Arcn1_j1         | 0.0570874   | 0.0446318       | 0          | 1         | 1         |
| Tmem25_j5        | 9.68639     | 10.6469         | 0          | 1         | 1         |
| Tmem25_j3        | 8.58163     | 1.90343         | 0          | 1         | 1         |
| Mll1_j2          | 0.213675    | 0.332546        | 0          | 1         | 1         |
| Mll1_j3          | 0.133208    | 0               | 0          | 1         | 1         |
| Il10ra_j1        | 0.439946    | 0.570442        | 0.374753   | 0.322262  | 0.665214  |
| Cep164_j5        | 0.651183    | 0.63526         | -0.0357176 | 0.903194  | 0.969087  |
| Rnf214_j2        | 6.4769      | 6.6873          | 0          | 1         | 1         |
| Rnf214           | 0.774527    | 0.726415        | 0          | 1         | 1         |
| Sidt2_j5         | 6.64162     | 10.1054         | 0          | 1         | 1         |
| Sidt2_j6         | 0.740294    | 0.211671        | 0          | 1         | 1         |
| Pafah1b2_j2      | 0.305227    | 2.36261         | 0          | 1         | 1         |
| XLOC_034805      | 0.341047    | 0.155111        | -1.13666   | 0.151858  | 0.483219  |

|                  |           |                 |            |           |           |
|------------------|-----------|-----------------|------------|-----------|-----------|
| XLOC_034805      | 0.175634  | 0.215777        | 0.296968   | 0.623272  | 0.852781  |
| XLOC_034806      | 0.224218  | 0 -1.79769e+308 |            | 1.09E-06  | 4.42E-05  |
| XLOC_034806      | 0.188157  | 0.038278        | -2.29735   | 0.0371596 | 0.213498  |
| Fam55b_j2        | 0.329457  | 0.135782        | -1.2788    | 0.0457675 | 0.24486   |
| Nnmt             | 0.187203  | 0.277546        | 0.568124   | 0.340647  | 0.680526  |
| Htr3b_j2         | 0.163033  | 0 -1.79769e+308 |            | 0.0017237 | 0.0221971 |
| Ncam1_j2         | 0.649263  | 1.68759         | 0          | 1         | 1         |
| Pts_j1           | 2.76623   | 0.000725406     | 0          | 1         | 1         |
| Pts_j2           | 3.15375   | 4.53441         | 0          | 1         | 1         |
| Dixdc1_j1        | 0.0323245 | 0.073594        | 1.18696    | 0.160298  | 1         |
| Dixdc1_j2        | 0.38567   | 0.227023        | -0.76453   | 0.0340518 | 0.202084  |
| SIK2_j1          | 0.584754  | 0.481137        | -0.281382  | 0.257161  | 0.605957  |
| Zc3h12c_j2       | 0.0736121 | 0 -1.79769e+308 |            | 0.0001143 | 1         |
| Zc3h12c_j4       | 0.120767  | 0.0151743       | -2.99252   | 0.0124375 | 1         |
| Ddx10_j1         | 2.26759   | 0.341494        | -2.73123   | 5.51E-08  | 3.21E-06  |
| Atm_j5           | 0.252983  | 0.179874        | 0          | 1         | 1         |
| Acat1_j1         | 8.1048    | 7.48109         | -0.115528  | 0.486213  | 0.777426  |
| Acat1            | 36.8044   | 34.0072         | -0.114039  | 0.225406  | 0.572498  |
| Rab39_j2         | 0.406597  | 0 -1.79769e+308 |            | 2.05E-11  | 2.36E-09  |
| Elmod1_j2        | 3.01111   | 5.5648          | 0.886033   | 1.45E-05  | 0.0004252 |
| Acsbg1_j2        | 2.83593   | 3.40861         | 0          | 1         | 1         |
| Acsbg1_j3        | 15.2042   | 13.7193         | 0          | 1         | 1         |
| Chrn4_j2         | 0.679184  | 0.493337        | -0.46123   | 0.153214  | 0.485433  |
| Snx33_j1         | 0.325458  | 0.268604        | -0.276992  | 0.579908  | 0.83125   |
| Neil1_j9         | 0.501515  | 0.302773        | -0.728056  | 0.223371  | 0.570386  |
| Neil1_j10        | 0.471694  | 0.521496        | 0.144803   | 0.721113  | 0.90017   |
| Mpi              | 0.0999315 | 0.432919        | 2.11509    | 3.02E-08  | 1.89E-06  |
| XLOC_034869      | 0.22101   | 0.316519        | 0.518184   | 0.36853   | 0.701791  |
| Csk_j4           | 30.4824   | 33.5642         | 0.138944   | 0.148176  | 0.477008  |
| Clk3_j4          | 0.860784  | 2.46174         | 1.51596    | 1.35E-12  | 1.89E-10  |
| Clk3_j9          | 3.51694   | 3.13339         | -0.166598  | 0.481661  | 0.775249  |
| Arid3b_j4        | 0.352028  | 0.281965        | -0.320174  | 0.496138  | 0.783139  |
| 2410076I21Rik_j1 | 0.414019  | 0.216604        | 0          | 1         | 1         |
| Bbs4_j4          | 0.0376686 | 0.11633         | 0          | 1         | 1         |
| Bbs4_j5          | 5.69576   | 4.43706         | 0          | 1         | 1         |
| Senp8            | 0.274262  | 0.164469        | 0          | 1         | 1         |
| Thsd4_j1         | 0.501134  | 0.382571        | -0.389469  | 0.142687  | 0.469414  |
| AK038653_j11     | 0.275452  | 0.161251        | -0.772497  | 0.24797   | 0.595267  |
| Lrrc49_j4        | 2.69912   | 1.64677         | -0.712849  | 0.0099385 | 0.0853084 |
| Lrrc49_j5        | 1.64261   | 12.8108         | 2.96331    | 0         | 0         |
| Kif23_j3         | 0.753507  | 0.447976        | -0.750198  | 0.0055364 | 0.0548342 |
| Paqr5_j4         | 1.44017   | 1.51718         | 0.0751575  | 0.758285  | 0.916885  |
| 2300009A05Rik_j1 | 0.560659  | 0 -1.79769e+308 |            | 0.0407089 | 0.22645   |
| Smad6_j1         | 0.292395  | 0.275422        | -0.0862773 | 0.916209  | 0.973929  |
| Zwilch_j2        | 0.144799  | 0 -1.79769e+308 |            | 0.0004674 | 0.0076978 |
| Rab11a_j1        | 1.46282   | 0.888746        | -0.718908  | 0.0103826 | 0.0879275 |
| Rab11a_j3        | 4.45972   | 2.20424         | -1.01667   | 1.78E-15  | 3.74E-13  |



|                  |           |                 |           |           |           |
|------------------|-----------|-----------------|-----------|-----------|-----------|
| Snx22_j4         | 0.342946  | 0               | 0         | 1         | 1         |
| Usp3_j1          | 0.821004  | 0.615722        | 0         | 1         | 1         |
| Aph1b            | 1.76564   | 1.83871         | 0         | 1         | 1         |
| Aph1c            | 1.84778   | 1.2395          | 0         | 1         | 1         |
| Rab8b_j2         | 2.02913   | 1.60145         | 0         | 1         | 1         |
| Lactb_j1         | 0.728674  | 0.58695         | -0.312035 | 0.477987  | 0.77269   |
| Tln2_j8          | 0.169149  | 0               | 0         | 1         | 1         |
| Tln2_j10         | 0.086147  | 0.0367842       | 0         | 1         | 1         |
| Tln2_j13         | 0.10096   | 0.0445028       | 0         | 1         | 1         |
| Fam81a_j1        | 4.61006   | 3.49354         | 0         | 1         | 1         |
| XLOC_034925      | 0.0567007 | 0.0299172       | -0.92239  | 0.682433  | 1         |
| Ccnb2_j1         | 0.19186   | 0.203668        | 0.0861672 | 0.941288  | 0.982153  |
| Rnf111_j6        | 0.589126  | 0.873973        | 0         | 1         | 1         |
| Rnf111_j5        | 0.165361  | 0.543175        | 0         | 1         | 1         |
| Fam63b_j1        | 7.92666   | 7.30895         | 0         | 1         | 1         |
| Grinl1a          | 4.23387   | 7.30789         | 0.787478  | 7.38E-06  | 0.000238  |
| Cgnl1_j2         | 2.01147   | 0.67597         | 0         | 1         | 1         |
| Cgnl1_j3         | 2.43847   | 1.70109         | 0         | 1         | 1         |
| Tcf12_j9         | 0.30869   | 0.298076        | 0         | 1         | 1         |
| Tex9             | 0.721726  | 0.364353        | -0.986116 | 0.0064548 | 0.0619057 |
| Gm5918           | 4.77732   | 4.77094         | 0         | 1         | 1         |
| Pigb_j2          | 0.81148   | 0.488241        | 0         | 1         | 1         |
| Unc13c_j4        | 0.0717361 | 0.0319671       | 0         | 1         | 1         |
| Unc13c_j6        | 0.263285  | 0               | 0         | 1         | 1         |
| Scg3_j1          | 1.01888   | 0.9731          | 0         | 1         | 1         |
| Scg3_j3          | 2.90151   | 1.9305          | 0         | 1         | 1         |
| Scg3_j6          | 1.16467   | 0.818766        | 0         | 1         | 1         |
| Scg3_j9          | 66.0399   | 66.6198         | 0         | 1         | 1         |
| Hcrtr2           | 0.522353  | 0.220328        | -1.24537  | 0.0533008 | 0.268707  |
| 2310046A06Rik_j7 | 0.610409  | 0.356553        | -0.775662 | 0.198165  | 0.54132   |
| Lrrc1_j3         | 0.958713  | 0.744432        | -0.364958 | 0.30892   | 0.653784  |
| Fbxo9_j2         | 0.49795   | 0.608761        | 0.289875  | 0.659869  | 0.870883  |
| Ooep_j6          | 1.90574   | 1.94352         | 0.028321  | 0.939936  | 0.981777  |
| Eef1a1_j3        | 1.8582    | 2.9057          | 0.644976  | 0.0095372 | 0.0826638 |
| Col12a1_j3       | 0.295774  | 0.190572        | -0.634156 | 0.0333639 | 0.19941   |
| Col12a1_j4       | 0.216534  | 0.30291         | 0.484296  | 0.128588  | 0.446769  |
| Filip1_j2        | 0.181632  | 0 -1.79769e+308 |           | 1.09E-09  | 9.09E-08  |
| Phip_j5          | 0.356794  | 0.121873        | 0         | 1         | 1         |
| Lca5_j1          | 0.545599  | 0.295061        | -0.886824 | 0.0473752 | 0.250002  |
| Lca5_j2          | 0.106798  | 0.0332973       | -1.68142  | 0.121898  | 1         |
| Fam46a           | 0.0663974 | 0.0782144       | 0.236308  | 0.75688   | 1         |
| Ube2cbp_j6       | 0.094947  | 0.046428        | -1.03213  | 0.446991  | 1         |
| Ube2cbp_j5       | 0.0814191 | 0 -1.79769e+308 |           | 0.0208425 | 1         |
| Pgm3_j1          | 0.618218  | 0.625475        | 0         | 1         | 1         |
| 4922501C03Rik_j1 | 0.40217   | 0.305941        | -0.39455  | 0.366578  | 0.700205  |
| 4922501C03Rik_j2 | 0.206752  | 0 -1.79769e+308 |           | 1.12E-11  | 1.34E-09  |
| Gm2382           | 1.32599   | 1.22707         | -0.111857 | 0.82943   | 0.944941  |

|                  |           |                 |            |           |           |
|------------------|-----------|-----------------|------------|-----------|-----------|
| Gm2382_j2        | 1.78879   | 2.35527         | 0.39691    | 0.372764  | 0.705702  |
| Gm2382_j3        | 0.63015   | 0.47977         | -0.393352  | 0.630317  | 0.856283  |
| Morf4l1_j3       | 0.954022  | 0.489568        | -0.962512  | 0.0484855 | 0.253476  |
| Morf4l1_j4       | 2.40567   | 2.55185         | 0.0851054  | 0.748405  | 0.912432  |
| Morf4l1_j9       | 0.10428   | 0 -1.79769e+308 |            | 0.15532   | 1         |
| 2610101N10Rik    | 0.60639   | 0.494969        | 0          | 1         | 1         |
| 2610101N10Rik_j1 | 1.61007   | 1.61576         | 0          | 1         | 1         |
| Trpc1_j2         | 0.492763  | 0.260914        | 0          | 1         | 1         |
| Pls1             | 1.51535   | 2.14505         | 0          | 1         | 1         |
| Atp1b3_j6        | 10.5869   | 7.82799         | 0          | 1         | 1         |
| Atp1b3_j7        | 0.278689  | 0.208321        | 0          | 1         | 1         |
| XLOC_034997      | 0.0846083 | 0 -1.79769e+308 |            | 0.0772961 | 1         |
| XLOC_034997      | 0.089341  | 0 -1.79769e+308 |            | 0.0175285 | 1         |
| XLOC_034997      | 0.238964  | 0.142304        | -0.74781   | 0.155174  | 0.488311  |
| Zbtb38           | 1.14509   | 2.06849         | 0          | 1         | 1         |
| Zbtb38_j6        | 0.811701  | 1.96346         | 0          | 1         | 1         |
| Spsb4_j1         | 1.10093   | 1.2093          | 0.135448   | 0.717945  | 0.898424  |
| Slc25a36_j1      | 0.553949  | 0.387473        | 0          | 1         | 1         |
| Clstn2_j3        | 3.37193   | 3.00713         | 0          | 1         | 1         |
| Esyt3_j8         | 0.234034  | 0.248796        | 0.0882447  | 0.841737  | 0.949995  |
| Esyt3_j7         | 0.15262   | 0 -1.79769e+308 |            | 9.67E-06  | 0.0003015 |
| Mras_j4          | 2.4309    | 6.54681         | 1.4293     | 0         | 0         |
| Armc8            | 2.46666   | 2.40698         | -0.0353371 | 0.85828   | 0.954952  |
| Ephb1_j1         | 0.162871  | 0.0758864       | -1.10182   | 0.127242  | 0.444464  |
| Cdv3_j2          | 4.63026   | 3.90111         | 0          | 1         | 1         |
| Cdv3_j3          | 0.865243  | 0.430024        | 0          | 1         | 1         |
| Cdv3_j4          | 3.01645   | 2.62744         | 0          | 1         | 1         |
| Tmem108_j3       | 0.452372  | 0.238607        | 0          | 1         | 1         |
| Uba5_j1          | 0.407962  | 0.601515        | 0.560166   | 0.224117  | 0.571421  |
| Dnajc13_j5       | 1.84042   | 2.00435         | 0          | 1         | 1         |
| Acpp_j3          | 46.5412   | 39.9231         | 0          | 1         | 1         |
| Acpp_j4          | 36.7445   | 25.0118         | 0          | 1         | 1         |
| Nek11_j4         | 0.08161   | 0 -1.79769e+308 |            | 0.0105925 | 1         |
| Gm5621           | 3.0819    | 4.05659         | 0.396448   | 0.108486  | 0.409522  |
| Ppm1m_j2         | 0.792049  | 1.0353          | 0.386385   | 0.343746  | 0.683717  |
| Acy1_j2          | 0.862725  | 1.06065         | 0.29797    | 0.383429  | 0.713038  |
| Acy1             | 0.791791  | 0.753987        | -0.0705797 | 0.857898  | 0.954916  |
| Parp3_j5         | 0.091915  | 0               | 0          | 1         | 1         |
| Dock3_j4         | 1.24228   | 0.210232        | -2.56294   | 8.88E-16  | 1.98E-13  |
| Dock3            | 1.38361   | 0.543267        | -1.3487    | 3.68E-09  | 2.79E-07  |
| Mapkapk3_j1      | 0.133428  | 0.261099        | 0.968528   | 0.181198  | 0.521104  |
| Mapkapk3_j6      | 0.201573  | 0.212986        | 0.0794521  | 0.91532   | 0.973525  |
| Mapkapk3_j7      | 0.247171  | 0.100536        | -1.2978    | 0.139921  | 0.465344  |
| Hemk1_j1         | 0.794804  | 0.924709        | 0.218401   | 0.497817  | 0.783786  |
| Hemk1            | 1.25449   | 1.27262         | 0.0206992  | 0.939542  | 0.981578  |
| Sema3b_j2        | 0.271288  | 0.222916        | -0.283328  | 0.539727  | 0.80852   |
| Sema3b_j5        | 0.538837  | 0.400314        | -0.428717  | 0.368365  | 0.701715  |

|                  |           |                 |            |           |           |
|------------------|-----------|-----------------|------------|-----------|-----------|
| Gnai2_j2         | 7.1296    | 10.058          | 0          | 1         | 1         |
| Gnai2_j3         | 19.1108   | 22.9107         | 0          | 1         | 1         |
| Sema3f_j3        | 5.45679   | 0.602373        | 0          | 1         | 1         |
| Rbm5_j1          | 7.82759   | 10.5274         | 0          | 1         | 1         |
| Rbm5_j2          | 2.46153   | 2.06735         | 0          | 1         | 1         |
| Rbm6_j2          | 0.228788  | 0.183585        | -0.317561  | 0.497691  | 0.783786  |
| 6230427J02Rik_j1 | 0.554296  | 0.542196        | -0.0318402 | 0.889501  | 0.964965  |
| Apeh             | 15.2824   | 14.8441         | -0.0419797 | 0.693519  | 0.886761  |
| P4htm_j4         | 14.1206   | 11.9704         | 0          | 1         | 1         |
| Arih2_j1         | 0.227118  | 0.235289        | 0          | 1         | 1         |
| Atrip_j9         | 1.2705    | 1.65309         | 0.379776   | 0.0890558 | 0.365717  |
| Atrip_j10        | 3.26291   | 3.46919         | 0.0884389  | 0.584465  | 0.833461  |
| Ccdc72_j3        | 7.72275   | 6.65953         | 0          | 1         | 1         |
| Ccdc72_j2        | 5.4835    | 12.775          | 0          | 1         | 1         |
| Dhx30_j1         | 0.303743  | 0.406086        | 0          | 1         | 1         |
| Ptpn23_j1        | 0.170819  | 0               | 0          | 1         | 1         |
| Ptpn23_j2        | 0.595483  | 0.436325        | 0          | 1         | 1         |
| Ptpn23_j3        | 5.03865   | 6.96756         | 0          | 1         | 1         |
| Klhl18_j4        | 1.4946    | 1.96338         | 0          | 1         | 1         |
| Nbeal2_j1        | 0.0865615 | 0.112487        | 0          | 1         | 1         |
| Nbeal2_j2        | 0.342457  | 0.310136        | 0          | 1         | 1         |
| Nbeal2_j3        | 0.0706588 | 0.146049        | 0          | 1         | 1         |
| Mlh1_j4          | 0.977585  | 0.89698         | -0.124147  | 0.755932  | 0.915824  |
| Stac_j2          | 0.685273  | 1.21109         | 0          | 1         | 1         |
| Arpp21_j3        | 3.78352   | 2.44018         | -0.63274   | 0.0133626 | 0.106021  |
| Rbms3_j3         | 28.1841   | 23.575          | 0          | 1         | 1         |
| Rbms3_j4         | 4.851     | 5.0568          | 0          | 1         | 1         |
| Plcd1_j3         | 0.0706403 | 0.244075        | 0          | 1         | 1         |
| 9330176C04Rik_j3 | 0.14657   | 0.119118        | 0          | 1         | 1         |
| Oxsr1_j1         | 6.64581   | 7.24994         | 0          | 1         | 1         |
| Scn5a_j1         | 0.267452  | 0.166357        | -0.684996  | 0.178163  | 0.517661  |
| Scn10a_j6        | 1.18003   | 0.414264        | -1.51019   | 3.42E-07  | 1.59E-05  |
| Scn11a_j3        | 73.4798   | 70.8869         | -0.0518292 | 0.554654  | 0.817684  |
| Ulk4_j8          | 0.0650174 | 0 -1.79769e+308 | 0.0354798  |           | 1         |
| Ulk4_j16         | 0.0466219 | 0 -1.79769e+308 | 0.106582   |           | 1         |
| Sec22c_j1        | 0.17774   | 0               | 0          | 1         | 1         |
| XLOC_035127      | 0.152647  | 0.0720699       | 0          | 1         | 1         |
| XLOC_035127      | 0.0738922 | 0.00994828      | 0          | 1         | 1         |
| Ano10_j2         | 0.374045  | 0.83884         | 0          | 1         | 1         |
| Gm10606_j1       | 0.197579  | 0.15741         | -0.327902  | 0.548639  | 0.814261  |
| XLOC_035130      | 0.120757  | 0 -1.79769e+308 | 0.023416   |           | 1         |
| XLOC_035131      | 0.184554  | 0.0760166       | -1.27965   | 0.132863  | 0.453727  |
| XLOC_035131      | 0.0438526 | 0.408135        | 3.21831    | 8.32E-05  | 0.0018321 |
| Zfp445_j2        | 4.49862   | 3.4066          | 0          | 1         | 1         |
| Slc6a20a         | 0.179887  | 0.190648        | 0.083814   | 0.88682   | 0.964085  |
| Fyco1_j2         | 0.049471  | 0.0174861       | -1.50038   | 0.180679  | 1         |
| Cwf19l2_j1       | 1.7997    | 1.59236         | 0          | 1         | 1         |

|                  |             |           |              |           |           |
|------------------|-------------|-----------|--------------|-----------|-----------|
| XLOC_034122      | 0.126597    | 0.0900855 | -0.490871    | 0.678627  | 1         |
| XLOC_034122      | 0.574274    | 0.656018  | 0.191997     | 0.389584  | 0.716725  |
| Casp4            | 0.394214    | 0.40545   | 0.040544     | 0.933977  | 0.979958  |
| Dcun1d5_j1       | 0.382472    | 0.438632  | 0.197657     | 0.555853  | 0.818579  |
| Dcun1d5_j2       | 22.5606     | 22.2747   | -0.0183985   | 0.895486  | 0.96693   |
| Trpc6_j2         | 1.04482     | 0.5971    | -0.807207    | 0.0228128 | 0.154266  |
| Maml2            | 1.09137     | 1.04164   | -0.0672755   | 0.764336  | 0.919184  |
| Fam76b_j4        | 0.000203546 | 0.287348  | 0            | 1         | 1         |
| Gpr83_j2         | 0.272301    | 0.253765  | -0.101712    | 0.849679  | 0.952228  |
| BC017612_j2      | 0.0799301   | 0.0500893 | -0.674237    | 0.725154  | 1         |
| BC017612_j4      | 0           | 1.74005   | 1.79769e+308 | 4.32E-06  | 0.0001488 |
| Slc36a4_j2       | 2.06298     | 1.90431   | 0            | 1         | 1         |
| Zfp317_j1        | 0           | 0.070831  | 0            | 1         | 1         |
| Zfp317_j4        | 0.126748    | 0.080069  | 0            | 1         | 1         |
| Zfp317_j2        | 0.0658213   | 0.121087  | 0            | 1         | 1         |
| 5730577103Rik_j1 | 0.0958498   | 0.0902202 | 0            | 1         | 1         |
| 5730577103Rik_j4 | 0.0198399   | 0.0572183 | 0            | 1         | 1         |
| Ubl5             | 0.0875109   | 0.146386  | 0            | 1         | 1         |
| Icam4            | 0.0491763   | 0.121268  | 1.30216      | 0.335576  | 1         |
| Pde4a            | 0           | 0.292793  | 1.79769e+308 | 2.17E-05  | 0.0005932 |
| Dnm2_j9          | 4.54118     | 6.96206   | 0            | 1         | 1         |
| Carm1_j3         | 2.30316     | 3.75811   | 0            | 1         | 1         |
| Bbs9_j10         | 0.030516    | 0.12481   | 2.0321       | 0.201936  | 1         |
| Sept7_j3         | 7.30895     | 6.60944   | -0.145135    | 0.351753  | 0.688957  |
| Thyn1_j3         | 2.35464     | 2.30638   | -0.0298754   | 0.937971  | 0.980993  |
| Igsf9b_j3        | 0.0536607   | 0.139256  | 0            | 1         | 1         |
| Opcml_j3         | 0.402304    | 0.140601  | -1.51668     | 0.0002715 | 0.0049278 |
| Opcml_j5         | 1.93826     | 1.02373   | -0.92093     | 7.98E-06  | 0.0002541 |
| Prdm10_j11       | 0.0842636   | 0.381294  | 2.17792      | 5.16E-05  | 0.0012259 |
| Nfrkb_j4         | 0           | 0.0921649 | 1.79769e+308 | 0.0147216 | 1         |
| Nfrkb_j8         | 1.72219     | 2.77709   | 0.68933      | 0.0088487 | 0.0782273 |
| Arhgap32_j2      | 0.0804429   | 0.313924  | 1.96438      | 1.10E-06  | 4.46E-05  |
| Ets1_j3          | 5.57E-05    | 0.271621  | 0            | 1         | 1         |
| Srpr_j3          | 0           | 0.0985767 | 0            | 1         | 1         |
| Pus3_j1          | 3.69473     | 3.37437   | -0.130852    | 0.431926  | 0.74396   |
| XLOC_034212      | 0.214259    | 0.063471  | -1.75519     | 0.0536388 | 0.269794  |
| XLOC_034212      | 0.00419524  | 0.0729825 | 4.12072      | 0.0398348 | 1         |
| XLOC_034213      | 0.288469    | 0.226634  | -0.348051    | 0.485446  | 0.777011  |
| Robo4_j6         | 0.0325602   | 0.243773  | 2.90436      | 0.0927599 | 0.374764  |
| Esam_j2          | 1.07716     | 1.32375   | 0.297408     | 0.185301  | 0.525537  |
| Vwa5a_j1         | 5.21223     | 4.47255   | -0.220806    | 0.0283779 | 0.179076  |
| XLOC_034221      | 0.140099    | 0.207926  | 0.569616     | 0.594006  | 0.838368  |
| Zfp202_j1        | 0           | 0.0677308 | 1.79769e+308 | 0.0261704 | 1         |
| Scn3b_j3         | 0.519153    | 0.9294    | 0            | 1         | 1         |
| 9030425E11Rik_j3 | 11.6818     | 13.088    | 0.163981     | 0.114775  | 0.421532  |
| XLOC_034229      | 0.0579423   | 0.0920036 | 0.667073     | 0.506972  | 1         |
| AK014147_j4      | 0.269023    | 0.237857  | -0.177635    | 0.843804  | 0.950589  |

|                  |           |                        |            |           |           |
|------------------|-----------|------------------------|------------|-----------|-----------|
| 2610203C20Rik_j1 | 3.1017    | 3.92336                | 0.339028   | 0.0616902 | 0.293593  |
| XLOC_034236      | 0         | 0.121721 1.79769e+308  |            | 0.0182528 | 1         |
| Hyou1_j2         | 2.15015   | 2.11252                | -0.0254717 | 0.903508  | 0.969103  |
| Slc37a4_j2       | 2.12548   | 1.90406                | -0.158703  | 0.550227  | 0.815285  |
| Slc37a4_j8       | 0.423244  | 0.801633               | 0.921453   | 0.0670913 | 0.309734  |
| Bcl9l_j6         | 1.90332   | 1.6048                 | 0          | 1         | 1         |
| Ddx6_j2          | 1.00283   | 2.11844                | 1.07893    | 3.69E-08  | 2.25E-06  |
| XLOC_034258      | 0.464929  | 0.366896               | -0.341636  | 0.60454   | 0.843983  |
| Mpzl2            | 0.0141204 | 0.0834046              | 2.56234    | 0.316786  | 1         |
| Scn4b_j3         | 23.4181   | 16.1814                | 0          | 1         | 1         |
| Scn4b_j9         | 24.6073   | 19.9258                | 0          | 1         | 1         |
| Fxyd6_j4         | 0         | 0.148977               | 0          | 1         | 1         |
| Zfp259_j1        | 5.94377   | 7.63625                | 0.361485   | 0.0697702 | 0.316921  |
| Bud13_j3         | 0.177752  | 0.145556               | -0.288291  | 0.66246   | 0.872014  |
| Bud13_j4         | 0.176355  | 0.142797               | -0.304522  | 0.711878  | 0.895433  |
| 2900052N01Rik_j2 | 0.709769  | 0.549244               | -0.369902  | 0.405815  | 0.727432  |
| Cadm1_j3         | 0         | 0.0658321              | 0          | 1         | 1         |
| Cadm1_j5         | 0         | 0.139394               | 0          | 1         | 1         |
| XLOC_034277      | 0         | 0.0509745 1.79769e+308 |            | 0.123638  | 1         |
| Zw10_j1          | 1.17879   | 1.02493                | -0.201784  | 0.488953  | 0.779321  |
| Tmprss5_j2       | 0.328125  | 0.741191               | 1.1756     | 0.0114872 | 0.0949064 |
| Tmprss5_j3       | 0.128628  | 0.207179               | 0.687667   | 0.364932  | 0.698811  |
| Drd2_j2          | 0.0581574 | 0.0939042              | 0.691228   | 0.411803  | 1         |
| Drd2_j7          | 0         | 0.0908602 1.79769e+308 |            | 0.0570648 | 1         |
| 1600029D21Rik_j2 | 0.11417   | 0.289764               | 1.34369    | 0.112681  | 0.417778  |
| Arhgap20_j1      | 0.052595  | 0.2413                 | 0          | 1         | 1         |
| 4930550C14Rik_j1 | 0         | 0.0541417 1.79769e+308 |            | 0.136128  | 1         |
| Slc35f2_j2       | 0.218874  | 0.994809               | 0          | 1         | 1         |
| Slc35f2_j4       | 0.177311  | 0.746634               | 0          | 1         | 1         |
| Ireb2_j3         | 2.11904   | 2.13253                | 0          | 1         | 1         |
| Ireb2_j4         | 7.5928    | 8.66644                | 0          | 1         | 1         |
| Agphd1_j2        | 0.0386788 | 0.0529648              | 0.453491   | 0.646508  | 1         |
| Ube2q2_j6        | 0         | 0.155367 1.79769e+308  |            | 0.0548055 | 1         |
| Ube2q2_j9        | 0.350481  | 0.450168               | 0.361126   | 0.446381  | 0.753343  |
| Al118078_j5      | 0         | 0.0602899 1.79769e+308 |            | 0.108595  | 1         |
| Hmg20a_j2        | 9.00783   | 9.27715                | 0.0425016  | 0.749795  | 0.913026  |
| Man2c1_j1        | 3.11637   | 3.27813                | 0          | 1         | 1         |
| Cox5a_j4         | 94.4129   | 95.1795                | 0          | 1         | 1         |
| Edc3             | 3.67292   | 3.24422                | -0.179058  | 0.274657  | 0.623768  |
| Stra6            | 0.0387038 | 0.128273               | 1.72868    | 0.038002  | 1         |
| Stra6_j3         | 0.203314  | 0.347177               | 0.771962   | 0.131935  | 0.451901  |
| Stoml1_j1        | 6.79866   | 9.83422                | 0.532559   | 0.0011045 | 0.0154617 |
| Parp6_j5         | 0.314703  | 0.517477               | 0          | 1         | 1         |
| Pkm2_j1          | 130.921   | 125.181                | 0          | 1         | 1         |
| Pkm2_j2          | 22.517    | 26.6106                | 0          | 1         | 1         |
| Pkm2_j3          | 95.0042   | 114.011                | 0          | 1         | 1         |
| Gramd2_j2        | 0.0923979 | 0.1164                 | 0          | 1         | 1         |

|                  |           |                        |             |           |           |
|------------------|-----------|------------------------|-------------|-----------|-----------|
| Gramd2_j5        | 0.0911891 | 0.365949               | 0           | 1         | 1         |
| Uaca_j3          | 0         | 0.0819133              | 0           | 1         | 1         |
| Uaca_j8          | 6.53649   | 5.64873                | 0           | 1         | 1         |
| Uaca_j11         | 1.73872   | 3.28849                | 0           | 1         | 1         |
| Anp32a_j4        | 0         | 0.550715               | 0           | 1         | 1         |
| AK039256_j1      | 0         | 0.0578386 1.79769e+308 |             | 0.148742  | 1         |
| Rpl4_j4          | 82.8425   | 95.9603                | 0           | 1         | 1         |
| Dennd4a_j1       | 1.95318   | 2.71613                | 0           | 1         | 1         |
| 2010321M09Rik_j1 | 3.08593   | 2.91761                | 0           | 1         | 1         |
| Igdcc4_j6        | 0.614352  | 0.619094               | 0           | 1         | 1         |
| Igdcc3           | 0.238427  | 0.200758               | -0.24809    | 0.600122  | 0.841571  |
| Igdcc3_j2        | 0         | 0.106685 1.79769e+308  |             | 0.0052375 | 1         |
| Cilp_j1          | 0         | 0.0738424 1.79769e+308 |             | 0.0154402 | 1         |
| Clpx_j1          | 0.11082   | 0.240737               | 0           | 1         | 1         |
| Gm514_j2         | 0         | 0.0864528 1.79769e+308 |             | 0.0076131 | 1         |
| Rasl12_j3        | 0.140491  | 0.418032               | 1.57314     | 0.0153415 | 0.116931  |
| Rbpms_j1         | 0.0782758 | 0.214372               | 1.45348     | 0.195369  | 0.537741  |
| Csnk1g1_j3       | 0.130548  | 0.135999               | 0.0590263   | 0.906399  | 1         |
| Csnk1g1_j2       | 0         | 0.0948467 1.79769e+308 |             | 0.002305  | 1         |
| Vps13c_j4        | 0         | 0.353558 1.79769e+308  |             | 3.87E-13  | 5.92E-11  |
| Vps13c_j6        | 1.17622   | 1.17475                | -0.00181027 | 0.993041  | 0.997985  |
| Anxa2_j2         | 1.12743   | 0.928964               | 0           | 1         | 1         |
| Myo1e_j6         | 0.0354864 | 0.0501492              | 0.498961    | 0.712661  | 1         |
| Sltm_j7          | 0.342618  | 0.410677               | 0           | 1         | 1         |
| Adam10_j1        | 15.1662   | 18.206                 | 0           | 1         | 1         |
| Dyx1c1_j3        | 0         | 0.0491415 1.79769e+308 |             | 0.115305  | 1         |
| Dyx1c1_j4        | 0.0582166 | 0.06759                | 0.215379    | 0.887629  | 1         |
| Ccpg1_j3         | 13.6842   | 14.1335                | 0           | 1         | 1         |
| Rsl24d1_j1       | 0.150626  | 0.0353766              | -2.0901     | 0.356174  | 0.692081  |
| Rsl24d1_j3       | 6.19974   | 8.21627                | 0.406276    | 0.0281176 | 0.177947  |
| Wdr72_j2         | 0.80739   | 0.205034               | -1.9774     | 3.39E-05  | 0.0008576 |
| BC031353         | 0.334799  | 0.451453               | 0           | 1         | 1         |
| BC031353_j4      | 0.251043  | 0.353502               | 0           | 1         | 1         |
| Arpp19_j1        | 17.8803   | 18.1504                | 0           | 1         | 1         |
| Leo1_j2          | 0.62369   | 0.407617               | -0.613614   | 0.337389  | 0.677935  |
| XLOC_034422      | 0         | 0.0879458 1.79769e+308 |             | 0.0467431 | 1         |
| Gclc_j2          | 3.65652   | 3.24832                | 0           | 1         | 1         |
| Elovl5_j2        | 0         | 0.0914864 1.79769e+308 |             | 0.150998  | 1         |
| Ick_j1           | 0         | 0.202322               | 0           | 1         | 1         |
| AK050586_j6      | 0         | 0.209743 1.79769e+308  |             | 0.0187776 | 0.135057  |
| AK146160         | 0.127441  | 0.200421               | 0.65321     | 0.225432  | 0.572498  |
| Senp6_j1         | 0.966644  | 1.15458                | 0           | 1         | 1         |
| XLOC_034440      | 0.10842   | 0.171312               | 0           | 1         | 1         |
| Myo6_j3          | 0.478834  | 0.351043               | -0.447879   | 0.124871  | 0.440234  |
| Myo6_j9          | 0.575358  | 0.508118               | -0.179298   | 0.549191  | 0.814518  |
| AK052495_j2      | 0         | 0.16759                | 0           | 1         | 1         |
| Mei4_j1          | 0.0213138 | 0.0695728              | 1.70674     | 0.445426  | 1         |

|              |           |           |              |           |           |
|--------------|-----------|-----------|--------------|-----------|-----------|
| XLOC_034449  | 0.0778113 | 0.245942  | 0            | 1         | 1         |
| Sh3bgrl2_j4  | 62.2696   | 53.3653   | -0.222627    | 0.0098858 | 0.08499   |
| Ttk_j2       | 0.0530075 | 0.0978006 | 0.883646     | 0.472053  | 1         |
| Tpbg         | 0.0365887 | 0.118328  | 1.69332      | 0.0844781 | 1         |
| Tpbg         | 0         | 0.21487   | 1.79769e+308 | 0.0003905 | 0.0066457 |
| Dopey1_j3    | 0.0533475 | 0.0808774 | 0            | 1         | 1         |
| Dopey1_j5    | 5.92675   | 5.26783   | 0            | 1         | 1         |
| Rwdd2a_j1    | 0.11735   | 0.504284  | 2.10342      | 0.0041971 | 0.0444142 |
| AK046134     | 0.656967  | 0.552186  | -0.250665    | 0.425904  | 0.740786  |
| Cyb5r4_j4    | 0.230526  | 0.393507  | 0.771462     | 0.260626  | 0.609434  |
| Mrap2_j2     | 0         | 0.0946757 | 1.79769e+308 | 0.051618  | 1         |
| Mrap2_j4     | 0         | 0.0902752 | 1.79769e+308 | 0.0442086 | 1         |
| Mrap2_j5     | 0         | 0.159875  | 1.79769e+308 | 0.0187137 | 0.134697  |
| Nt5e_j1      | 12.9878   | 11.9306   | -0.122494    | 0.259725  | 0.608472  |
| Mthfs_j3     | 1.31992   | 1.10089   | -0.261786    | 0.58272   | 0.832835  |
| XLOC_034471  | 0.354434  | 0.167321  | -1.0829      | 0.310347  | 0.655096  |
| Rasgrf1_j6   | 0.493974  | 0.457807  | 0            | 1         | 1         |
| Adamts7_j5   | 0         | 0.287938  | 1.79769e+308 | 6.29E-07  | 2.77E-05  |
| Adamts7_j3   | 0.0510274 | 8.03E-05  | -9.31151     | 0.855615  | 1         |
| Adamts7_j11  | 0         | 0.0940206 | 1.79769e+308 | 0.0087813 | 1         |
| Zic4_j1      | 0.0412845 | 0.138211  | 1.7432       | 0.105907  | 1         |
| Plscr1_j1    | 0.140661  | 0.230682  | 0.71368      | 0.39534   | 0.720466  |
| Plod2_j5     | 0.389849  | 0.624033  | 0.678708     | 0.157557  | 0.491628  |
| XLOC_034485  | 0.525914  | 0.482689  | -0.123734    | 0.825882  | 0.94384   |
| Xrn1_j10     | 0.373029  | 0.382855  | 0            | 1         | 1         |
| Gk5          | 0.271613  | 0.360508  | 0.408482     | 0.166497  | 0.502925  |
| Tfdp2_j1     | 0         | 0.115463  | 0            | 1         | 1         |
| AK089981_j1  | 0.199257  | 0.332907  | 0.740485     | 0.161242  | 0.496147  |
| AK089981_j4  | 0.325293  | 0.507992  | 0.643068     | 0.179708  | 0.519364  |
| XLOC_034508  | 0.423007  | 0.418367  | 0            | 1         | 1         |
| Ryk_j2       | 2.54705   | 3.37864   | 0            | 1         | 1         |
| Slco2a1      | 0.20743   | 0.204202  | -0.0226252   | 0.956924  | 0.987617  |
| Slco2a1_j3   | 0.361308  | 0.419352  | 0.214934     | 0.598238  | 0.840659  |
| Rab6b_j1     | 27.5409   | 53.663    | 0            | 1         | 1         |
| Nphp3_j7     | 0.180522  | 0.266612  | 0.562572     | 0.297308  | 0.643881  |
| Nphp3_j10    | 1.28882   | 1.14611   | -0.169305    | 0.57603   | 0.828686  |
| Mrpl3_j1     | 0.262598  | 0.0679022 | -1.95133     | 0.111615  | 0.415753  |
| Aste1_j1     | 0.347814  | 0.325465  | -0.0958131   | 0.836401  | 0.947564  |
| Aste1_j5     | 0.426783  | 0.42364   | -0.0106612   | 0.986794  | 0.99622   |
| Tlr9         | 0.106331  | 0.101467  | -0.0675434   | 0.923523  | 1         |
| Cacna2d2_j2  | 0.10295   | 0.135855  | 0            | 1         | 1         |
| Cacna2d2_j11 | 0.0164433 | 0.0738087 | 0            | 1         | 1         |
| Hyal2_j2     | 3.76642   | 3.98116   | 0.0799954    | 0.660937  | 0.871443  |
| Hyal1_j1     | 2.73953   | 3.95347   | 0.529194     | 0.0002104 | 0.0040027 |
| Ifrd2_j2     | 0.221169  | 0.376667  | 0.768137     | 0.207366  | 0.551881  |
| Mst1r        | 0         | 0.313946  | 1.79769e+308 | 3.19E-06  | 0.0001148 |
| Traip_j6     | 0.102684  | 0.0883026 | -0.217684    | 0.82295   | 1         |

|             |             |           |               |           |           |
|-------------|-------------|-----------|---------------|-----------|-----------|
| Uba7_j2     | 0.996502    | 0.976625  | -0.0290667    | 0.910833  | 0.972011  |
| Ip6k1_j10   | 0.0612864   | 0.0491889 | -0.317233     | 0.815927  | 1         |
| Rhoa_j1     | 6.20556     | 10.8365   | 0             | 1         | 1         |
| XLOC_034551 | 0.121962    | 0.151737  | 0             | 1         | 1         |
| Qrich1_j2   | 2.33777     | 2.29716   | 0             | 1         | 1         |
| Impdh2_j6   | 0.0640278   | 0.125869  | 0             | 1         | 1         |
| Nckipsd_j4  | 1.20134     | 2.00588   | 0.73959       | 0.0184942 | 0.133551  |
| Slc26a6_j4  | 0.0435444   | 0.196352  | 2.17288       | 0.0145595 | 0.112504  |
| Slc26a6     | 0.94883     | 0.639843  | -0.568432     | 0.0562137 | 0.277405  |
| Slc26a6_j3  | 0           | 0.102788  | 1.79769e+308  | 0.0157682 | 1         |
| Col7a1_j1   | 0           | 0.139068  | 1.79769e+308  | 3.05E-05  | 1         |
| Col7a1_j9   | 0.0718413   | 0.28813   | 2.00384       | 0.0811376 | 0.34681   |
| Ccdc51_j1   | 3.03341     | 3.021     | 0             | 1         | 1         |
| Plxnb1      | 1.061       | 1.04045   | 0             | 1         | 1         |
| Nme6_j1     | 0.0654935   | 0         | -1.79769e+308 | 0.0086147 | 1         |
| Mtap4_j2    | 7.38098     | 10.2228   | 0             | 1         | 1         |
| Mtap4_j3    | 3.24616     | 3.79579   | 0             | 1         | 1         |
| Kif9_j3     | 0.183426    | 0.259669  | 0.501473      | 0.327506  | 0.670398  |
| Kif9_j12    | 0.137687    | 0.397966  | 1.53126       | 0.0371945 | 0.213607  |
| Setd2_j2    | 0.288649    | 0.122655  | -1.23472      | 0.0044118 | 0.0462924 |
| Ccdc12      | 0.0407734   | 0.0702786 | 0.785458      | 0.725414  | 1         |
| Als2cl_j4   | 0           | 0.0673728 | 1.79769e+308  | 0.0094612 | 1         |
| Als2cl_j5   | 0.12965     | 0.114106  | -0.184253     | 0.729796  | 1         |
| Als2cl_j15  | 0.000226363 | 0.27997   | 10.2724       | 0.767572  | 0.920744  |
| Lrrc2_j1    | 0.0571756   | 0.365903  | 2.67799       | 0.0016829 | 0.0217398 |
| Trank1_j2   | 3.02E-05    | 0.053591  | 10.7916       | 0.911538  | 1         |
| Trank1      | 0.156416    | 0.128294  | -0.285939     | 0.538888  | 0.80821   |
| Clasp2_j11  | 18.0587     | 19.617    | 0             | 1         | 1         |
| Osbpl10_j9  | 3.22509     | 1.78217   | 0             | 1         | 1         |
| XLOC_034599 | 0.106637    | 0.16927   | 0.666615      | 0.559099  | 0.82044   |
| Golga4_j6   | 0.137234    | 0.164088  | 0.257833      | 0.568897  | 0.825693  |
| Itga9_j4    | 0.195555    | 0.245926  | 0.330648      | 0.497673  | 0.783786  |
| Vill_j1     | 0.0111621   | 0.0931096 | 3.06032       | 0.0669747 | 1         |
| Dlec1_j2    | 0           | 0.0480885 | 1.79769e+308  | 0.126848  | 1         |
| Dlec1_j3    | 0           | 0.0742096 | 1.79769e+308  | 0.0619691 | 1         |
| Dlec1_j8    | 0           | 0.0928559 | 1.79769e+308  | 0.0704692 | 1         |
| Acaa1a_j6   | 0           | 0.105996  | 0             | 1         | 1         |
| Acaa1a_j7   | 7.40447     | 9.08828   | 0             | 1         | 1         |
| XLOC_034614 | 0.207416    | 0.28873   | 0             | 1         | 1         |
| Xylb_j1     | 0.168354    | 0.36614   | 1.1209        | 0.0395053 | 0.222113  |
| Acvr2b_j1   | 0.057983    | 0.0492587 | -0.235253     | 0.847578  | 1         |
| Rpsa_j6     | 1.48813     | 0.958173  | 0             | 1         | 1         |
| Rpsa_j9     | 3.93758     | 11.7074   | 0             | 1         | 1         |
| Myrip_j2    | 0           | 0.154716  | 0             | 1         | 1         |
| Eif1b_j1    | 106.571     | 129.718   | 0.283567      | 0.0056989 | 0.0561351 |
| Eif1b_j2    | 155.82      | 193.857   | 0.315117      | 0.0006228 | 0.00978   |
| Rpl14_j4    | 0.0502146   | 0.157349  | 0             | 1         | 1         |



|                  |             |           |              |           |           |
|------------------|-------------|-----------|--------------|-----------|-----------|
| Rpl14_j6         | 0.573229    | 0.417744  | 0            | 1         | 1         |
| Ctnnb1_j4        | 0.339255    | 0.421923  | 0            | 1         | 1         |
| XLOC_034632      | 0.0817592   | 0.160128  | 0.969777     | 0.463089  | 0.763471  |
| XLOC_034632      | 0.102175    | 0.112396  | 0.137546     | 0.898271  | 1         |
| Trak1_j6         | 0.292836    | 0         | 0            | 1         | 1         |
| Trak1_j8         | 4.53762     | 4.11223   | 0            | 1         | 1         |
| XLOC_034640      | 0.0848141   | 0.0960121 | 0            | 1         | 1         |
| Snrk_j5          | 0.474597    | 0.505747  | 0            | 1         | 1         |
| Abhd5_j2         | 0.816875    | 1.77667   | 0            | 1         | 1         |
| XLOC_034646      | 1.10317     | 1.14542   | 0.054215     | 0.76277   | 0.918318  |
| XLOC_034646      | 0           | 0.282356  | 1.79769e+308 | 4.41E-09  | 3.31E-07  |
| XLOC_034649      | 0.0816362   | 0.110383  | 0.43523      | 0.678358  | 1         |
| XLOC_034654      | 0.10348     | 0.0908772 | -0.187362    | 0.876993  | 1         |
| Ccr5             | 0.217338    | 1.0734    | 2.30418      | 1.22E-10  | 1.22E-08  |
| Dync2h1_j8       | 1.30207     | 0.935681  | -0.476724    | 0.035956  | 0.209181  |
| Dync2h1_j7       | 0.000156231 | 0.22512   | 10.4928      | 0.709382  | 0.89421   |
| Birc2_j1         | 2.31767     | 3.00437   | 0.374387     | 0.145964  | 0.474022  |
| Birc3_j5         | 0           | 0.0700584 | 1.79769e+308 | 0.12481   | 1         |
| 9230110C19Rik_j2 | 0.505556    | 0.92965   | 0            | 1         | 1         |
| Cntn5_j3         | 0           | 0.058194  | 1.79769e+308 | 0.0134633 | 1         |
| Cntn5_j4         | 0           | 0.168176  | 1.79769e+308 | 4.70E-05  | 0.0011336 |
| Endod1_j2        | 1.06288     | 3.77341   | 0            | 1         | 1         |
| Kdm4d_j1         | 3.05E-05    | 0.064264  | 11.042       | 0.947781  | 1         |
| Kdm4d_j2         | 0.125363    | 0.0427027 | -1.55372     | 0.103395  | 1         |
| Amotl1_j1        | 9.84397     | 12.5976   | 0            | 1         | 1         |
| Panx1_j3         | 0           | 0.731515  | 0            | 1         | 1         |
| 5830418K08Rik_j1 | 0.248588    | 0.427548  | 0.782331     | 0.0038344 | 0.0416327 |
| 5830418K08Rik_j2 | 0.239803    | 0.289605  | 0.272236     | 0.316464  | 0.660085  |
| Fat3_j4          | 0.275273    | 0.320471  | 0            | 1         | 1         |
| Fat3_j9          | 0.0183109   | 0.128919  | 0            | 1         | 1         |
| Zfp558_j2        | 0.0603107   | 0.0267085 | -1.17512     | 0.385103  | 1         |
| Zfp558_j3        | 0.016138    | 0.0981625 | 2.60471      | 0.0490909 | 1         |
| Zfp558_j9        | 0.0931136   | 0.135192  | 0.53795      | 0.672485  | 1         |
| Zfp560_j3        | 0.305841    | 0.265233  | -0.205518    | 0.635279  | 0.858544  |
| Zfp26_j1         | 0.384287    | 0.475818  | 0            | 1         | 1         |
| Zfp266_j5        | 0.000192569 | 0.234283  | 0            | 1         | 1         |
| Fbxl12           | 1.23379     | 1.04047   | 0            | 1         | 1         |
| Col5a3_j2        | 0.0608399   | 0.0893396 | 0            | 1         | 1         |
| Col5a3_j1        | 0.601115    | 3.29289   | 0            | 1         | 1         |
| Zglp1_j2         | 0           | 0.0644998 | 1.79769e+308 | 0.155103  | 1         |
| Raver1_j8        | 3.32839     | 4.16814   | 0.324581     | 0.0570872 | 0.279916  |
| Raver1_j9        | 1.24512     | 1.5781    | 0.341899     | 0.168323  | 0.504956  |
| Tyk2_j8          | 0           | 0.826862  | 0            | 1         | 1         |
| Kri1_j4          | 20.1433     | 22.3073   | 0.147217     | 0.0981422 | 0.387205  |
| Ap1m2_j2         | 0.0231583   | 0.0541815 | 1.22627      | 0.590536  | 1         |
| Ap1m2_j1         | 0.00412782  | 0.137044  | 5.05311      | 0.280501  | 1         |
| Dock6_j1         | 0.125592    | 0.185322  | 0            | 1         | 1         |

|                  |             |                 |              |           |           |
|------------------|-------------|-----------------|--------------|-----------|-----------|
| Epor_j2          | 0.0769572   | 0.0310505       | -1.30944     | 0.496213  | 1         |
| Zfp653_j6        | 0.420641    | 0.876251        | 1.05876      | 0.000389  | 0.006625  |
| Zfp653_j8        | 1.36888     | 1.10341         | -0.311032    | 0.144275  | 0.471393  |
| Anln_j3          | 0.213201    | 0.248864        | 0.223143     | 0.746802  | 0.911779  |
| Anln_j4          | 0           | 0.0680117       | 1.79769e+308 | 0.0341571 | 1         |
| Anln_j5          | 0.0241597   | 0.0820946       | 1.76468      | 0.11882   | 1         |
| rp9_j2           | 8.7172      | 13.4962         | 0.630616     | 0.001129  | 0.0157636 |
| Dpy19l1_j2       | 0           | 0.724311        | 0            | 1         | 1         |
| Glb1l2_j2        | 0.0384316   | 0.124275        | 1.69317      | 0.0836387 | 1         |
| Glb1l2           | 0.00020472  | 0.124852        | 9.25235      | 0.744157  | 1         |
| Ntm_j4           | 3.18784     | 2.35779         | -0.435141    | 0.0174667 | 0.128162  |
| Adamts15_j3      | 4.00493     | 3.68175         | 0            | 1         | 1         |
| Aplp2_j5         | 21.9718     | 20.5452         | 0            | 1         | 1         |
| Tmem45b_j3       | 54.6779     | 50.4991         | -0.114699    | 0.261599  | 0.610774  |
| A130066N16Rik_j4 | 0.594123    | 0.788869        | 0.409024     | 0.131071  | 0.450644  |
| Pknnox2_j7       | 0           | 0.179664        | 0            | 1         | 1         |
| Ccdc15_j2        | 0.137019    | 0.13449         | -0.0268691   | 0.972648  | 1         |
| Ccdc15_j3        | 0.000176108 | 0.0564466       | 8.32428      | 0.82049   | 1         |
| Gramd1b_j1       | 0.338923    | 0.535921        | 0            | 1         | 1         |
| Gramd1b_j3       | 4.35732     | 1.61972         | 0            | 1         | 1         |
| Gramd1b_j4       | 2.72243     | 1.11864         | 0            | 1         | 1         |
| 4931429l11Rik_j4 | 0.301062    | 0.573617        | 0.930026     | 0.0533938 | 0.268961  |
| 4931429l11Rik    | 0.968638    | 0.791606        | -0.291174    | 0.377715  | 0.709365  |
| Ubash3b_j4       | 13.7007     | 12.6636         | 0            | 1         | 1         |
| Ubash3b_j5       | 1.20738     | 4.00946         | 0            | 1         | 1         |
| Sorl1_j3         | 13.4125     | 13.7378         | 0            | 1         | 1         |
| Tbcel            | 4.49727     | 5.13221         | 0            | 1         | 1         |
| Tbcel_j3         | 0           | 0.0569446       | 0            | 1         | 1         |
| Grik4_j2         | 1.05879     | 0.920571        | 0            | 1         | 1         |
| Arhgef12_j6      | 1.91221     | 2.35923         | 0            | 1         | 1         |
| Tmem136_j2       | 1.25354     | 1.12524         | 0            | 1         | 1         |
| Tmem136_j1       | 0.17735     | 0.38877         | 0            | 1         | 1         |
| XLOC_034776      | 0           | 0.121134        | 1.79769e+308 | 0.103547  | 1         |
| Hinfj_j7         | 0           | 0.131209        | 0            | 1         | 1         |
| Hmbs_j1          | 0.0479861   | 0 -1.79769e+308 | 0.0498868    | 0.0498868 | 1         |
| Phldb1_j12       | 0.35517     | 0.359617        | 0            | 1         | 1         |
| Phldb1_j13       | 0           | 0.156141        | 0            | 1         | 1         |
| Phldb1_j15       | 0.0373785   | 0.371637        | 0            | 1         | 1         |
| Phldb1_j14       | 0.052202    | 0.0376133       | 0            | 1         | 1         |
| Phldb1_j16       | 0.112127    | 0.280779        | 0            | 1         | 1         |
| Arcn1_j3         | 24.2539     | 21.8624         | 0            | 1         | 1         |
| Mll1_j7          | 2.82983     | 3.10739         | 0            | 1         | 1         |
| Cd3g             | 0.157158    | 0.296697        | 0.916771     | 0.205702  | 0.550145  |
| Gm10684_j1       | 0.202532    | 0.0892704       | 0            | 1         | 1         |
| Cep164_j9        | 2.41115     | 2.63295         | 0.126959     | 0.513041  | 0.792379  |
| Cep164           | 0.614492    | 0.662358        | 0.108218     | 0.68781   | 0.883962  |
| Cep164_j10       | 0.239664    | 0.274491        | 0.195749     | 0.576124  | 0.828702  |

|                  |            |                        |             |           |           |
|------------------|------------|------------------------|-------------|-----------|-----------|
| Rnf214           | 0.20476    | 0.276388               | 0           | 1         | 1         |
| Sidt2_j8         | 12.2501    | 15.7262                | 0           | 1         | 1         |
| XLOC_034805      | 0          | 0.0871212 1.79769e+308 | 0.0516092   |           | 1         |
| XLOC_034806      | 0.146785   | 0.134605               | -0.124974   | 0.85289   | 0.953424  |
| XLOC_034806      | 0          | 0.27448 1.79769e+308   | 2.07E-05    | 0.0005697 |           |
| Htr3a_j1         | 0          | 0.469582               | 0           | 1         | 1         |
| Htr3b_j3         | 4.71586    | 3.93459                | -0.261305   | 0.18389   | 0.524542  |
| Htr3b_j4         | 0.591277   | 0.293415               | -1.01089    | 0.0718265 | 0.322325  |
| Sdhd_j1          | 70.1411    | 69.7636                | -0.00778411 | 0.933724  | 0.979873  |
| AU019823_j2      | 5.0421     | 5.7517                 | 0.189964    | 0.174016  | 0.512054  |
| Dixdc1_j3        | 0.057225   | 0.11496                | 1.00641     | 0.382713  | 1         |
| 1110032A03Rik_j1 | 17.064     | 15.7979                | -0.111219   | 0.488923  | 0.779314  |
| Gapdh_j1         | 0.153495   | 0.373365               | 1.2824      | 0.0209073 | 0.145317  |
| Gapdh_j2         | 0          | 0.183926 1.79769e+308  | 0.0019827   | 0.0248178 |           |
| Zc3h12c_j8       | 0.446394   | 0.367533               | -0.280442   | 0.352689  | 0.689516  |
| Zc3h12c_j9       | 0          | 0.175681 1.79769e+308  | 7.62E-06    | 0.0002447 |           |
| Zc3h12c_j10      | 0.261476   | 0.241833               | -0.112669   | 0.741324  | 0.909259  |
| AI593442         | 14.5922    | 9.26744                | 0           | 1         | 1         |
| Ddx10_j2         | 0.0874938  | 3.85567                | 5.46166     | 1.33E-15  | 2.89E-13  |
| Cul5             | 6.64915    | 7.08241                | 0.0910722   | 0.392612  | 0.718796  |
| Rab39_j1         | 0          | 0.0900176 1.79769e+308 | 0.0047183   |           | 1         |
| XLOC_034847      | 4.25551    | 4.02504                | -0.0803308  | 0.84679   | 0.951509  |
| Wdr61_j1         | 2.34204    | 1.46876                | 0           | 1         | 1         |
| Chrb4_j1         | 0          | 0.0633058 1.79769e+308 | 0.0389108   |           | 1         |
| C230081A13Rik_j4 | 0.381806   | 0.523659               | 0.455785    | 0.124357  | 0.439475  |
| Lingo1_j3        | 5.04793    | 3.31679                | 0           | 1         | 1         |
| Neil1_j6         | 0.414271   | 0.361376               | -0.197077   | 0.770173  | 0.921728  |
| Neil1_j7         | 0.242232   | 0.276364               | 0.190181    | 0.788747  | 0.929506  |
| Neil1            | 0.156491   | 0.390734               | 1.32011     | 0.214457  | 0.559857  |
| Ppcdc_j2         | 1.03041    | 0.925593               | 0           | 1         | 1         |
| Ppcdc            | 0.791006   | 1.17021                | 0           | 1         | 1         |
| Scamp5_j5        | 11.709     | 15.2499                | 0           | 1         | 1         |
| Lman1l_j1        | 0.0207955  | 0.0990282              | 2.25157     | 0.315433  | 1         |
| Csk_j5           | 0.197313   | 0.145281               | -0.441641   | 0.64143   | 0.861742  |
| Csk_j6           | 4.09058    | 4.07437                | -0.00572937 | 0.974427  | 0.992676  |
| Arid3b_j6        | 0.106536   | 0.172337               | 0.693893    | 0.292147  | 0.638961  |
| Arid3b_j5        | 0          | 0.202459 1.79769e+308  | 0.0003922   | 0.006668  |           |
| Ccdc33_j1        | 0.127796   | 0.174974               | 0.4533      | 0.576672  | 0.829099  |
| Islr2            | 0.204264   | 0.178159               | -0.197273   | 0.735652  | 0.906939  |
| Islr2_j2         | 0          | 0.264189 1.79769e+308  | 0.0001307   | 0.0026869 |           |
| Pml_j2           | 3.33E-05   | 0.275032               | 0           | 1         | 1         |
| 2410076I21Rik_j3 | 0.779431   | 1.01836                | 0           | 1         | 1         |
| Neo1_j1          | 0.00150964 | 0.601617               | 0           | 1         | 1         |
| Arih1_j3         | 4.7058     | 7.63383                | 0           | 1         | 1         |
| Paqr5_j5         | 4.43861    | 3.1288                 | -0.504501   | 0.0088276 | 0.0781261 |
| XLOC_034892      | 0.0205182  | 0.122966               | 2.58328     | 0.144607  | 1         |
| Coro2b_j2        | 9.24969    | 7.69753                | 0           | 1         | 1         |

|                  |             |           |              |           |           |
|------------------|-------------|-----------|--------------|-----------|-----------|
| Map2k5_j2        | 5.20823     | 6.16286   | 0.242808     | 0.381209  | 0.711804  |
| Map2k1_j4        | 0           | 0.139375  | 0            | 1         | 1         |
| Dis3l_j1         | 0.59412     | 2.09696   | 0            | 1         | 1         |
| Rab11a_j5        | 0.310002    | 0.090441  | -1.77723     | 0.33513   | 0.675781  |
| Ptplad1_j1       | 6.90748     | 9.30876   | 0            | 1         | 1         |
| Zfp609_j3        | 0.851423    | 1.07386   | 0            | 1         | 1         |
| Trip4_j2         | 4.17218     | 4.21871   | 0.015998     | 0.896645  | 0.967057  |
| Snx22_j2         | 2.21446     | 2.20398   | 0            | 1         | 1         |
| Snx1_j1          | 3.32836     | 6.33075   | 0.927566     | 1.55E-06  | 6.03E-05  |
| Ccnb2            | 5.64E-06    | 0.20978   | 15.1838      | 0.994818  | 0.998486  |
| Ccnb2_j2         | 0           | 0.0629284 | 1.79769e+308 | 0.0715394 | 1         |
| Rnf111_j9        | 0.531652    | 0.498404  | 0            | 1         | 1         |
| Lipc_j1          | 0.0364332   | 0.189581  | 2.37949      | 0.0607713 | 0.290668  |
| Cgnl1            | 8.80383     | 8.04444   | 0            | 1         | 1         |
| Tcf12_j3         | 0.0433998   | 0.144952  | 0            | 1         | 1         |
| Tex9_j2          | 0.445369    | 0.416176  | -0.0978068   | 0.784499  | 0.927523  |
| Mapk6_j2         | 0           | 0.218956  | 0            | 1         | 1         |
| 2310046A06Rik_j4 | 0.0622117   | 0.890191  | 3.83886      | 0.0009419 | 0.0136323 |
| 2310046A06Rik_j3 | 0.564515    | 1.34343   | 1.25084      | 0.003029  | 0.0346888 |
| Lrrc1_j2         | 0.150744    | 0.0321127 | -2.23089     | 0.0640365 | 0.300273  |
| Fbxo9_j5         | 0.560145    | 0.20607   | -1.44267     | 0.0459061 | 0.245227  |
| Fbxo9_j6         | 1.83044     | 1.62115   | -0.17517     | 0.569421  | 0.82591   |
| Ooep_j4          | 0           | 0.0614741 | 1.79769e+308 | 0.135685  | 1         |
| Ooep_j5          | 0.169801    | 0.0782041 | -1.11853     | 0.590136  | 0.836402  |
| Eef1a1_j4        | 19.3004     | 29.5669   | 0.615348     | 9.94E-08  | 5.34E-06  |
| Filip1_j4        | 0.799953    | 0.913083  | 0.19083      | 0.36952   | 0.702946  |
| Filip1_j6        | 1.8053      | 1.29451   | -0.479838    | 0.0239365 | 0.159454  |
| Hmgn3            | 1.18701     | 2.77004   | 0            | 1         | 1         |
| XLOC_034963      | 0           | 0.560793  | 1.79769e+308 | 0.0268125 | 0.172435  |
| Fam46a_j1        | 0.0664997   | 0.135096  | 1.02256      | 0.126517  | 1         |
| Ube2cbp_j3       | 0.000360245 | 0.158396  | 8.78034      | 0.898014  | 0.967557  |
| Me1_j8           | 0.111667    | 0.536845  | 2.2653       | 0.259336  | 0.608037  |
| Snap91_j6        | 0.722672    | 1.5634    | 0            | 1         | 1         |
| Syncrip_j5       | 1.73502     | 2.38437   | 0            | 1         | 1         |
| Gm2382_j1        | 0           | 0.293822  | 1.79769e+308 | 0.0490795 | 0.255376  |
| Tmed3_j1         | 15.644      | 15.8016   | 0.0144616    | 0.920588  | 0.975139  |
| Atp1b3_j4        | 2.68576     | 1.28135   | 0            | 1         | 1         |
| Atp1b3_j3        | 5.91183     | 19.2677   | 0            | 1         | 1         |
| Rnf7_j4          | 0.0035982   | 0.40324   | 6.80822      | 0.13426   | 0.456007  |
| XLOC_034997      | 0.0573147   | 0.095655  | 0.738936     | 0.66164   | 1         |
| XLOC_034997      | 0.161902    | 0.0341658 | -2.2445      | 1         | 1         |
| XLOC_034997      | 0.00269158  | 0.12679   | 5.55784      | 1         | 1         |
| Zbtb38_j1        | 1.56935     | 1.07081   | 0            | 1         | 1         |
| Acpl2_j1         | 0           | 0.134172  | 1.79769e+308 | 0.0105232 | 1         |
| Spsb4_j2         | 0.237762    | 0.190474  | -0.319921    | 0.680054  | 0.879617  |
| Slc25a36_j2      | 0.716667    | 0.605992  | 0            | 1         | 1         |
| Clstn2_j2        | 6.054       | 7.29068   | 0            | 1         | 1         |

|                  |           |           |              |           |          |
|------------------|-----------|-----------|--------------|-----------|----------|
| Pik3cb_j3        | 0         | 0.648231  | 0            | 1         | 1        |
| Pik3cb_j4        | 5.51451   | 4.84757   | 0            | 1         | 1        |
| Pik3cb_j6        | 0.213094  | 0.256276  | 0            | 1         | 1        |
| Nck1_j2          | 0.6348    | 2.51574   | 0            | 1         | 1        |
| Nck1_j3          | 0.7033    | 0.710067  | 0            | 1         | 1        |
| Ppp2r3a_j1       | 0.098028  | 0.405502  | 0            | 1         | 1        |
| Cep63_j4         | 3.62464   | 2.40066   | 0            | 1         | 1        |
| 1300017J02Rik_j2 | 0.034785  | 0.0871253 | 1.32463      | 0.380856  | 1        |
| Cdv3_j1          | 0.0982255 | 0.0583602 | 0            | 1         | 1        |
| Tmem108          | 1.01168   | 1.39224   | 0            | 1         | 1        |
| Dnajc13_j3       | 3.83036   | 5.2137    | 0            | 1         | 1        |
| Glyctk_j3        | 0         | 0.129875  | 1.79769e+308 | 0.0031842 | 1        |
| Ppm1m_j1         | 0.930955  | 0.735984  | -0.339038    | 0.319464  | 0.662774 |
| Acy1_j3          | 1.19321   | 1.06348   | -0.166056    | 0.755274  | 0.915526 |
| Parp3_j4         | 2.37471   | 3.65176   | 0            | 1         | 1        |
| Dock3_j10        | 0.145607  | 0.112688  | -0.369743    | 0.472964  | 0.769762 |
| Mapkapk3_j2      | 0.014238  | 0.0767943 | 2.43125      | 0.154797  | 1        |
| Hemk1_j5         | 1.37828   | 1.20367   | -0.195426    | 0.526001  | 0.800979 |
| Cyb561d2_j2      | 17.6221   | 19.6189   | 0.154855     | 0.252386  | 0.600397 |
| Sema3b_j4        | 21.0197   | 22.5069   | 0.0986257    | 0.30781   | 0.652824 |
| Sema3f_j1        | 0.279848  | 0.205715  | 0            | 1         | 1        |
| Dag1             | 3.79475   | 2.71784   | 0            | 1         | 1        |
| Dag1_j4          | 0.0104084 | 1.48436   | 0            | 1         | 1        |
| Tcta             | 0.803471  | 0.855345  | 0            | 1         | 1        |
| Klhdc8b_j1       | 0.371757  | 0.569881  | 0            | 1         | 1        |
| P4htm_j1         | 1.50562   | 1.31917   | 0            | 1         | 1        |
| P4htm_j3         | 0.111908  | 0.0713635 | 0            | 1         | 1        |
| Atrip_j2         | 0.159402  | 0.0891965 | -0.837607    | 0.191146  | 0.533267 |
| Ptpn23           | 0.450472  | 0         | 0            | 1         | 1        |
| Klhl18_j2        | 0.0416839 | 0.331065  | 0            | 1         | 1        |
| Ccr12            | 3.46E-05  | 0.189802  | 12.4216      | 0.972051  | 0.991962 |
| Ccr12_j1         | 0         | 0.125002  | 1.79769e+308 | 0.0272068 | 1        |
| Stac_j1          | 15.4923   | 24.7505   | 0            | 1         | 1        |
| XLOC_035082      | 0.0583784 | 0.218279  | 1.90267      | 0.176376  | 0.515049 |
| Arpp21_j4        | 0.354951  | 0.421651  | 0.248429     | 0.557838  | 0.819817 |
| Fbxl2_j2         | 16.7806   | 17.4297   | 0            | 1         | 1        |
| Fbxl2_j6         | 1.345     | 1.28124   | 0            | 1         | 1        |
| Cnot10_j2        | 2.70276   | 2.66127   | 0            | 1         | 1        |
| Rbms3_j2         | 0.111522  | 1.48227   | 0            | 1         | 1        |
| XLOC_035100      | 0         | 0.102946  | 0            | 1         | 1        |
| Plcd1_j2         | 3.33159   | 5.78297   | 0            | 1         | 1        |
| 9330176C04Rik_j5 | 0.214398  | 0.284637  | 0            | 1         | 1        |
| Oxsr1_j2         | 9.16849   | 10.131    | 0            | 1         | 1        |
| Scn10a_j7        | 0         | 1.97635   | 1.79769e+308 | 7.95E-12  | 9.96E-10 |
| Scn11a_j1        | 11.7064   | 9.68273   | -0.273806    | 0.0153686 | 0.117034 |
| Ulk4_j6          | 0.154884  | 0.363305  | 1.23         | 0.238116  | 0.585036 |
| Ulk4_j13         | 0         | 0.0567905 | 1.79769e+308 | 0.0870903 | 1        |

|                  |           |           |              |           |           |
|------------------|-----------|-----------|--------------|-----------|-----------|
| Ulk4_j14         | 0.0728712 | 0.0760016 | 0.0606817    | 0.955188  | 1         |
| Cck_j2           | 0         | 0.210687  | 1.79769e+308 | 0.0611522 | 0.291803  |
| Sec22c_j4        | 0.725058  | 1.43694   | 0            | 1         | 1         |
| Hhatl_j3         | 0.115272  | 0.110362  | -0.0628064   | 0.958175  | 1         |
| C85492_j2        | 0.151826  | 2.43568   | 0            | 1         | 1         |
| Zfp445_j3        | 1.3364    | 1.04684   | 0            | 1         | 1         |
| Slc6a20a_j1      | 0.0642737 | 0.0917118 | 0.512878     | 0.713427  | 1         |
| Lztf1_j1         | 1.04044   | 1.02618   | -0.0199088   | 0.924254  | 0.976334  |
| Alkbh8_j1        | 0         | 0.097179  | 0            | 1         | 1         |
| Alkbh8_j4        | 0.297847  | 0.780222  | 0            | 1         | 1         |
| 8430410K20Rik_j1 | 0         | 0.137781  | 0            | 1         | 1         |
| Casp1_j2         | 3.11347   | 1.48247   | 0            | 1         | 1         |
| Casp4_j3         | 0         | 0.0844353 | 1.79769e+308 | 0.0936054 | 1         |
| Dcun1d5_j3       | 0.949569  | 2.15224   | 1.18049      | 0.0377509 | 0.215658  |
| Mtmr2_j3         | 6.35662   | 6.81796   | 0            | 1         | 1         |
| Fam76b_j1        | 0.0893678 | 0.178208  | 0            | 1         | 1         |
| Slc36a4_j6       | 0.450771  | 1.81382   | 0            | 1         | 1         |
| Zfp317_j11       | 0         | 0.0695979 | 0            | 1         | 1         |
| Zfp846_j1        | 0.392218  | 0.411937  | 0            | 1         | 1         |
| 5730577I03Rik_j3 | 0.0300612 | 0.0909939 | 0            | 1         | 1         |
| A230050P20Rik_j3 | 3.17695   | 3.05742   | -0.0553309   | 0.754371  | 0.915355  |
| Ppan_j1          | 0         | 0.0730511 | 1.79769e+308 | 0.103695  | 1         |
| Pde4a_j3         | 0.502259  | 0.561198  | 0.160079     | 0.681532  | 0.88037   |
| Slc44a2          | 0         | 0.754134  | 1.79769e+308 | 1.37E-10  | 1.35E-08  |
| Qtrt1_j1         | 0.511464  | 0.860626  | 0.750755     | 0.0699251 | 0.31735   |
| Dnm2_j5          | 2.39891   | 2.91278   | 0            | 1         | 1         |
| Dnm2_j6          | 2.34982   | 3.01472   | 0            | 1         | 1         |
| XLOC_034167      | 0.0818264 | 0.0929472 | 0.183845     | 0.868032  | 1         |
| XLOC_034167      | 0.10517   | 0.157729  | 0.584723     | 0.486811  | 0.777816  |
| Carm1_j1         | 5.42214   | 5.01571   | 0            | 1         | 1         |
| Smarca4_j6       | 3.18996   | 3.30126   | 0            | 1         | 1         |
| Ccdc159_j1       | 0.456909  | 0.482153  | 0            | 1         | 1         |
| Prkcsj_j3        | 0.140713  | 0.726612  | 2.36843      | 0.0003243 | 0.0056994 |
| Zfp809_j2        | 0.518636  | 0.804109  | 0            | 1         | 1         |
| Sept7_j2         | 7.39646   | 7.54521   | 0.0287262    | 0.876215  | 0.960645  |
| Sept7_j1         | 0.401464  | 0.414541  | 0.0462432    | 0.932339  | 0.979496  |
| Eepd1_j5         | 0         | 2.02442   | 0            | 1         | 1         |
| Thyn1_j1         | 1.59032   | 2.75344   | 0.791922     | 0.0377855 | 0.21578   |
| Opcml_j1         | 1.8435    | 1.32686   | -0.474429    | 0.0024467 | 0.0293371 |
| Opcml_j7         | 10.4758   | 9.09218   | -0.204356    | 0.0628887 | 0.296948  |
| Prdm10_j1        | 0.107643  | 0.0868469 | -0.309706    | 0.55656   | 1         |
| Prdm10_j5        | 0.944332  | 1.07943   | 0.192899     | 0.488486  | 0.779009  |
| Prdm10_j10       | 1.01752   | 0.519141  | -0.970858    | 0.0004759 | 0.0078082 |
| Nfrkb_j2         | 0.0432756 | 0.10536   | 1.2837       | 0.104913  | 1         |
| Arhgap32_j3      | 0.0591013 | 0.0739228 | 0.322829     | 0.588725  | 1         |
| Kirrel3_j3       | 0.601088  | 0.599729  | -0.0032655   | 0.99504   | 0.998626  |
| Srpr_j1          | 0.982523  | 0.757919  | 0            | 1         | 1         |

|                  |            |           |              |           |           |
|------------------|------------|-----------|--------------|-----------|-----------|
| Pate2_j2         | 0.761771   | 0.770308  | 0.0160799    | 0.938424  | 0.981171  |
| XLOC_034212      | 0.0556077  | 0.0971749 | 0.805298     | 0.5025    | 1         |
| Robo4            | 0.00723557 | 0.697411  | 6.59076      | 0.0003903 | 0.0066457 |
| BC024479         | 0.798241   | 0.867273  | 0.119662     | 0.753984  | 0.915071  |
| BC024479_j1      | 1.87214    | 1.73925   | -0.106219    | 0.518898  | 0.796709  |
| Vwa5a_j6         | 39.1876    | 37.4525   | -0.0653373   | 0.449337  | 0.755468  |
| Zfp202_j2        | 0.166083   | 0.262824  | 0.662186     | 0.224223  | 0.571444  |
| AK134203         | 1.21585    | 1.00974   | 0            | 1         | 1         |
| Ddx6_j5          | 13.7964    | 15.1111   | 0.131317     | 0.188834  | 0.530536  |
| Ift46_j1         | 6.98337    | 9.1348    | 0            | 1         | 1         |
| Dscaml1_j1       | 0.0587134  | 0.217985  | 1.89247      | 0.0141684 | 0.110377  |
| Bud13_j2         | 0.662749   | 1.09306   | 0.721839     | 0.0212358 | 0.146718  |
| 2900052N01Rik_j4 | 0.440553   | 0.334118  | -0.398955    | 0.44146   | 0.750197  |
| Cadm1_j7         | 0          | 0.403506  | 0            | 1         | 1         |
| Cadm1_j9         | 0          | 1.71191   | 0            | 1         | 1         |
| XLOC_034275      | 0.206757   | 0.278454  | 0.429501     | 0.445439  | 0.752997  |
| Fam55d_j1        | 0.59613    | 0.613121  | 0.0405448    | 0.923569  | 0.976223  |
| XLOC_034277      | 0.0847416  | 0.175692  | 1.05191      | 0.236408  | 0.583594  |
| Tmprss5_j4       | 0.020037   | 0.103474  | 2.36853      | 0.126897  | 1         |
| Cryab_j1         | 6.04406    | 12.9858   | 1.10334      | 9.90E-08  | 5.33E-06  |
| Cryab_j2         | 52.8323    | 50.8856   | -0.0541638   | 0.603888  | 0.843588  |
| Ppp2r1b_j1       | 0.630342   | 0.87047   | 0.465659     | 0.197076  | 0.53985   |
| Arhgap20_j3      | 3.09E-05   | 0.602153  | 0            | 1         | 1         |
| 4930550C14Rik_j3 | 0          | 0.0831029 | 1.79769e+308 | 0.118458  | 1         |
| Agphd1           | 0.0493174  | 0.114947  | 1.2208       | 0.340869  | 1         |
| Chrna5           | 0.16652    | 0.618206  | 1.89239      | 3.20E-07  | 1.50E-05  |
| Ube2q2_j7        | 2.51833    | 2.49257   | -0.0148356   | 0.953414  | 0.986494  |
| Al118078_j3      | 0.544747   | 0.578688  | 0.0871994    | 0.811747  | 0.938249  |
| Rcn2_j1          | 0.296901   | 1.19535   | 2.00938      | 0.0011597 | 0.0160958 |
| Snupn_j1         | 4.53641    | 5.21041   | 0.199844     | 0.15883   | 0.49326   |
| XLOC_034321      | 0.0430488  | 0.129025  | 1.58361      | 0.124417  | 1         |
| Ptpn9_j1         | 15.6338    | 14.4157   | 0            | 1         | 1         |
| Ptpn9_j4         | 11.2255    | 12.0827   | 0            | 1         | 1         |
| Stra6_j2         | 0          | 0.0564373 | 1.79769e+308 | 0.0286532 | 1         |
| Nptn_j2          | 24.6111    | 39.2216   | 0            | 1         | 1         |
| Pkm2_j4          | 0.240017   | 0.523273  | 0            | 1         | 1         |
| Gramd2_j3        | 0          | 0.34464   | 0            | 1         | 1         |
| Gramd2_j4        | 0.271691   | 0.453055  | 0            | 1         | 1         |
| Larp6_j1         | 10.5731    | 9.63101   | -0.134637    | 0.343606  | 0.683622  |
| Uaca_j6          | 0.683093   | 1.04627   | 0            | 1         | 1         |
| Uaca_j13         | 0          | 0.114189  | 0            | 1         | 1         |
| Tle3_j5          | 0.956051   | 1.23699   | 0            | 1         | 1         |
| Anp32a_j1        | 7.17768    | 8.17419   | 0            | 1         | 1         |
| Tipin_j2         | 2.57202    | 2.29756   | 0            | 1         | 1         |
| Megf11_j2        | 0.0598358  | 0.0269221 | -1.15222     | 0.46658   | 1         |
| Megf11_j3        | 0.921335   | 0.787382  | -0.226663    | 0.561526  | 0.821809  |
| Megf11_j4        | 0.158127   | 0.139606  | -0.179722    | 0.825195  | 0.943675  |

|             |           |           |              |           |           |
|-------------|-----------|-----------|--------------|-----------|-----------|
| Dennd4a_j2  | 0.0317772 | 0.175545  | 0            | 1         | 1         |
| Igdcc4_j5   | 0.611229  | 0.371311  | 0            | 1         | 1         |
| Parp16_j2   | 0.25887   | 1.06665   | 2.04279      | 0.0001682 | 0.0033206 |
| Mtfmt_j3    | 0.150264  | 0.238298  | 0.66527      | 0.590632  | 0.836692  |
| Herc1_j11   | 42.5409   | 40.8802   | 0            | 1         | 1         |
| Narg2_j5    | 0         | 0.224042  | 1.79769e+308 | 0.0001804 | 0.0035208 |
| Narg2_j8    | 0.977048  | 0.926617  | -0.0764568   | 0.848708  | 0.952141  |
| Bnip2_j2    | 5.21146   | 6.75257   | 0.373748     | 0.0241486 | 0.160406  |
| Bnip2_j4    | 4.42268   | 4.14509   | -0.0935173   | 0.647383  | 0.864093  |
| Gtf2a2_j1   | 16.539    | 15.9411   | -0.0531269   | 0.75031   | 0.913315  |
| Gtf2a2_j2   | 2.27784   | 2.27911   | 0.000808279  | 0.997916  | 0.999228  |
| Myo1e_j5    | 25.3068   | 23.7871   | -0.089347    | 0.370024  | 0.703535  |
| Sltm        | 4.31145   | 4.38018   | 0            | 1         | 1         |
| Sltm_j5     | 1.34303   | 1.36682   | 0            | 1         | 1         |
| Znf280d_j4  | 1.71969   | 1.54596   | -0.153649    | 0.504164  | 0.787468  |
| Znf280d_j5  | 1.28455   | 1.4648    | 0.189442     | 0.48978   | 0.779571  |
| Rfx7_j3     | 0.391769  | 0.202178  | -0.954375    | 0.0078625 | 0.0716537 |
| Nedd4_j5    | 0.225816  | 1.11675   | 0            | 1         | 1         |
| Dyx1c1_j1   | 0.267434  | 0.246928  | -0.115093    | 0.833727  | 0.946434  |
| Ccp1_j5     | 5.61347   | 5.41325   | 0            | 1         | 1         |
| Rab27a_j2   | 0.812062  | 0.684694  | 0            | 1         | 1         |
| Wdr72_j3    | 0.260426  | 0.290474  | 0.157535     | 0.805463  | 0.935663  |
| XLOC_034418 | 0.266051  | 0.226154  | -0.234399    | 0.716374  | 0.897624  |
| Gclc_j1     | 3.55322   | 3.99418   | 0            | 1         | 1         |
| AK050586_j2 | 0         | 0.0594352 | 1.79769e+308 | 0.113466  | 1         |
| AK050586_j1 | 0.161606  | 0.235719  | 0.544587     | 0.478105  | 0.772723  |
| AK050586_j7 | 0.155712  | 0.21126   | 0.440137     | 0.586337  | 0.83433   |
| Cd109_j2    | 0.404961  | 1.36866   | 0            | 1         | 1         |
| XLOC_034440 | 0.0689075 | 0.0862432 | 0            | 1         | 1         |
| Senp6_j2    | 0.746861  | 0.917202  | 0            | 1         | 1         |
| XLOC_034440 | 0.0402417 | 0.0684996 | 0            | 1         | 1         |
| Myo6_j10    | 0.0681669 | 0.0382239 | -0.834597    | 0.377881  | 1         |
| Prss35_j2   | 3.06696   | 2.95057   | -0.0558142   | 0.787897  | 0.929394  |
| Cyb5r4_j2   | 1.21274   | 1.13245   | -0.0988264   | 0.756135  | 0.915908  |
| Mrap2_j1    | 0         | 0.163831  | 1.79769e+308 | 0.0191985 | 0.137057  |
| Adamts7_j16 | 0.167768  | 0.32426   | 0.950681     | 0.116455  | 0.424494  |
| Plod2_j2    | 0.0375183 | 0.0901635 | 1.26495      | 0.1662    | 1         |
| XLOC_034482 | 0.0901315 | 0.0748375 | 0            | 1         | 1         |
| Slc9a9_j4   | 53.1531   | 51.0461   | 0            | 1         | 1         |
| Xrn1_j7     | 0.0336938 | 0.0863595 | 0            | 1         | 1         |
| Xrn1_j11    | 1.47264   | 1.48001   | 0            | 1         | 1         |
| Tfdp2_j4    | 0         | 0.064841  | 0            | 1         | 1         |
| Tfdp2_j3    | 0.378852  | 0.16005   | 0            | 1         | 1         |
| Tfdp2       | 1.11065   | 1.09326   | 0            | 1         | 1         |
| Rbp2_j1     | 0.590419  | 1.269     | 1.10389      | 0.11441   | 0.420859  |
| Copb2_j3    | 0.533526  | 0.25495   | -1.06534     | 0.169767  | 0.506768  |
| Cep70_j6    | 0.105671  | 0.1909    | 0.853239     | 0.243788  | 0.591081  |



|             |            |           |              |           |           |
|-------------|------------|-----------|--------------|-----------|-----------|
| Dzip1l_j6   | 0          | 0.0878404 | 1.79769e+308 | 0.0098384 | 1         |
| Anapc13_j1  | 13.8505    | 15.6948   |              | 0 1       | 1         |
| Ryk_j1      | 0          | 0.204844  |              | 0 1       | 1         |
| Nphp3_j11   | 0          | 0.140786  | 1.79769e+308 | 0.0218179 | 1         |
| Cpne4_j5    | 0          | 0.0531436 |              | 0 1       | 1         |
| Wdr82_j2    | 8.16404    | 9.159     |              | 0 1       | 1         |
| Poc1a_j2    | 0.617888   | 0.597681  | -0.0479707   | 0.892623  | 0.966055  |
| Rpl29_j3    | 0          | 0.0569002 | 1.79769e+308 | 0.269326  | 1         |
| Pcbp4_j3    | 13.417     | 12.2213   |              | 0 1       | 1         |
| Pcbp4_j7    | 0.120459   | 2.24491   |              | 0 1       | 1         |
| Vprbp_j4    | 0.00413592 | 1.40546   |              | 0 1       | 1         |
| Cacna2d2_j3 | 0.0629361  | 0         |              | 0 1       | 1         |
| Nprl2_j2    | 3.69142    | 3.32553   | -0.150594    | 0.522502  | 0.798932  |
| Nprl2_j1    | 0          | 0.108045  | 1.79769e+308 | 0.0764514 | 1         |
| Rassf1_j2   | 0.186172   | 1.0888    | 2.54803      | 0.0001235 | 0.0025615 |
| Traip_j2    | 0.053007   | 0.109188  | 1.04256      | 0.528712  | 1         |
| Traip_j5    | 0          | 0.103612  | 1.79769e+308 | 0.106279  | 1         |
| Traip_j7    | 0.0286201  | 0.106449  | 1.89506      | 0.181846  | 1         |
| Traip_j9    | 0.357174   | 0.556637  | 0.640109     | 0.521409  | 0.798183  |
| Uba7_j5     | 0.15656    | 0.0713038 | -1.13467     | 0.217199  | 0.563423  |
| Ube1l       | 0.700751   | 0.791304  | 0.17533      | 0.665413  | 0.873092  |
| Amt_j2      | 0          | 0.237174  | 0            | 1         | 1         |
| Usp19_j8    | 0.379038   | 0.824901  | 0            | 1         | 1         |
| Impdh2_j3   | 1.62618    | 1.46173   | 0            | 1         | 1         |
| Celsr3      | 0.315595   | 0.226455  | 0            | 1         | 1         |
| Celsr3_j14  | 0.139285   | 0.222239  | 0            | 1         | 1         |
| Celsr3_j13  | 0          | 0.799812  | 0            | 1         | 1         |
| Col7a1_j7   | 0.501734   | 0.860453  | 0.778174     | 0.0824248 | 0.349776  |
| Plxnb1_j4   | 0.0621383  | 0.0659939 | 0            | 1         | 1         |
| Plxnb1_j3   | 0.0286927  | 0.225321  | 0            | 1         | 1         |
| Nme6_j6     | 0          | 0.587935  | 1.79769e+308 | 0.0011651 | 0.0161433 |
| Nme6_j5     | 9.92E-05   | 0.142005  | 10.4828      | 0.958068  | 1         |
| Nme6_j7     | 0.194043   | 0.627351  | 1.6929       | 0.024338  | 0.16129   |
| Mtap4_j1    | 28.5       | 27.4275   | 0            | 1         | 1         |
| Mtap4_j7    | 32.0646    | 41.7136   | 0            | 1         | 1         |
| Kif9_j6     | 0          | 0.0696846 | 1.79769e+308 | 0.0447607 | 1         |
| Kif9_j10    | 0.0307593  | 0.0863511 | 1.48919      | 0.249402  | 1         |
| Setd2_j1    | 0.0866747  | 0.0827867 | -0.0662114   | 0.909841  | 1         |
| Ccdc12_j3   | 0.0273433  | 0.0988374 | 1.85387      | 0.283056  | 1         |
| Als2cl_j3   | 0.0623952  | 0.15612   | 1.32315      | 0.0431628 | 1         |
| Als2cl_j11  | 0.0773852  | 0.111436  | 0.52608      | 0.455629  | 1         |
| Als2cl_j16  | 0.331486   | 0.310827  | -0.0928375   | 0.866071  | 0.957348  |
| Lrrc2_j2    | 0.0714159  | 0.058542  | -0.286771    | 0.839186  | 1         |
| Lrrfip2_j4  | 7.95181    | 10.0212   | 0            | 1         | 1         |
| Clasp2_j1   | 4.74862    | 5.32482   | 0            | 1         | 1         |
| Clasp2_j2   | 2.75435    | 2.64785   | 0            | 1         | 1         |
| Clasp2_j7   | 2.39651    | 2.16611   | 0            | 1         | 1         |

|             |             |            |              |           |           |
|-------------|-------------|------------|--------------|-----------|-----------|
| Dync1li1_j1 | 45.4351     | 47.6057    | 0.0673278    | 0.497913  | 0.783786  |
| Osbp10_j5   | 9.79653     | 11.371     | 0            | 1         | 1         |
| Gadl1_j1    | 0           | 0.0556871  | 1.79769e+308 | 0.123195  | 1         |
| Gadl1_j2    | 0.291637    | 0.213064   | -0.452891    | 0.543408  | 0.81082   |
| XLOC_034607 | 0.0482771   | 0.113774   | 1.23676      | 0.299221  | 1         |
| Golga4_j11  | 4.76521     | 5.28532    | 0.14945      | 0.209845  | 0.55432   |
| Ctdspl_j1   | 0           | 0.292827   | 0            | 1         | 1         |
| Vill_j7     | 0.095912    | 0.00483944 | -4.3088      | 0.292051  | 1         |
| Vill_j11    | 0           | 0.13244    | 1.79769e+308 | 0.0549836 | 1         |
| Dlec1_j4    | 0.0809643   | 0.0591926  | -0.451869    | 0.730899  | 1         |
| Dlec1_j6    | 0.0501955   | 0.0581984  | 0.213422     | 0.863038  | 1         |
| Dlec1_j11   | 0.125962    | 0.172966   | 0.457491     | 0.560598  | 0.821119  |
| Dlec1_j13   | 0.167291    | 0.15875    | -0.0756068   | 0.95309   | 0.986399  |
| Acaa1a_j4   | 1.0394      | 1.20544    | 0            | 1         | 1         |
| Acvr2b_j2   | 0.0494544   | 0.204878   | 2.05059      | 0.0056575 | 0.0558291 |
| Exog_j1     | 3.47901     | 3.2813     | 0            | 1         | 1         |
| Wdr48_j3    | 10.9668     | 9.9252     | 0            | 1         | 1         |
| Wdr48_j4    | 0.0481091   | 1.21923    | 0            | 1         | 1         |
| Rpsa_j7     | 0.81762     | 1.53599    | 0            | 1         | 1         |
| Rpsa_j8     | 14.5435     | 8.11599    | 0            | 1         | 1         |
| Rpsa        | 24.7669     | 30.28      | 0            | 1         | 1         |
| Rpl14_j3    | 1.55832     | 2.95426    | 0            | 1         | 1         |
| Trak1_j3    | 0.712513    | 0.327565   | 0            | 1         | 1         |
| Nktr_j3     | 0           | 0.154831   | 1.79769e+308 | 4.25E-06  | 1         |
| Nktr_j8     | 0.243177    | 0.41971    | 0.787387     | 0.0028023 | 0.0326211 |
| Snrk_j3     | 0.0513348   | 0.0254661  | 0            | 1         | 1         |
| Abhd5       | 0.643139    | 2.10543    | 0            | 1         | 1         |
| XLOC_034646 | 0.114685    | 0.150822   | 0.395168     | 0.688732  | 1         |
| Zfp167_j2   | 0.139231    | 0.140095   | 0.00892129   | 0.988742  | 0.996606  |
| Kif15_j1    | 0.0613101   | 0.0630417  | 0.04018      | 0.969836  | 1         |
| XLOC_034654 | 0.0863222   | 0.190667   | 1.14325      | 0.172082  | 0.509298  |
| Dync2h1_j2  | 0.05652     | 0.215809   | 1.93292      | 2.38E-05  | 0.0006395 |
| Birc2_j5    | 0.748968    | 0.958427   | 0.355765     | 0.231259  | 0.578377  |
| AK129341_j3 | 0.0725147   | 0.173833   | 0            | 1         | 1         |
| Amotl1_j5   | 0.173604    | 0.138785   | 0            | 1         | 1         |
| Panx1_j4    | 22.2125     | 24.2631    | 0            | 1         | 1         |
| Fat3_j5     | 0.129469    | 0.13235    | 0            | 1         | 1         |
| Fat3_j10    | 0.000516718 | 0.194302   | 0            | 1         | 1         |
| Naalad2_j6  | 0.199735    | 0.378624   | 0.922674     | 0.0346844 | 0.204568  |
| Zfp558_j4   | 0.0352994   | 0.0817454  | 1.21149      | 0.226     | 1         |
| Zfp558_j1   | 0.134294    | 0.18853    | 0.489398     | 0.368706  | 0.701988  |
| Zfp558_j10  | 0.122726    | 0.207204   | 0.755607     | 0.499663  | 0.784707  |
| Raver1_j1   | 0.4951      | 0.508746   | 0.0392257    | 0.924016  | 0.976334  |
| Tyk2_j3     | 0.0326651   | 0.17462    | 0            | 1         | 1         |
| Cdc37_j4    | 63.1588     | 69.3432    | 0.134771     | 0.130047  | 0.449086  |
| Cdc37_j5    | 0.469127    | 0.576348   | 0.296963     | 0.574821  | 0.828142  |
| Kri1_j2     | 0.106665    | 0.115254   | 0.111724     | 0.853525  | 1         |

|             |            |           |               |           |           |
|-------------|------------|-----------|---------------|-----------|-----------|
| Spc24_j2    | 0.0913413  | 0.159125  | 0.800825      | 0.536934  | 0.8071    |
| Dock6_j9    | 0.0661588  | 0.84642   | 0             | 1         | 1         |
| Dock6_j10   | 0.103683   | 0.075285  | 0             | 1         | 1         |
| Dock6_j12   | 0.0479803  | 0.0925626 | 0             | 1         | 1         |
| Dock6_j11   | 0.498664   | 0.47943   | 0             | 1         | 1         |
| Tmem205     | 35.7383    | 37.5823   | 0             | 1         | 1         |
| Rgl3_j1     | 0.125068   | 0.130503  | 0.0613698     | 0.930393  | 1         |
| Ccdc151_j3  | 0.0634886  | 0.0956493 | 0.591257      | 0.634467  | 1         |
| Ccdc151_j5  | 0          | 0.0628246 | 1.79769e+308  | 0.0676429 | 1         |
| Ccdc151_j4  | 0.0613381  | 0         | -1.79769e+308 | 0.0214166 | 1         |
| Elavl3_j3   | 27.7058    | 35.9043   | 0.373966      | 2.43E-05  | 0.0006485 |
| Zfp810_j2   | 1.18171    | 1.45835   | 0             | 1         | 1         |
| Zfp810_j3   | 0          | 0.149799  | 0             | 1         | 1         |
| Herpud2_j1  | 0.369641   | 0.490186  | 0.407205      | 0.235395  | 0.582626  |
| Ntm_j2      | 0          | 0.202857  | 1.79769e+308  | 0.0103451 | 0.0877012 |
| Ntm_j3      | 0.381142   | 0.603911  | 0.664008      | 0.0605685 | 0.290153  |
| Tirap_j3    | 0.131443   | 0.242903  | 0.885941      | 0.0798231 | 0.343371  |
| Foxred1_j2  | 0.40376    | 0.436114  | 0             | 1         | 1         |
| Ei24_j1     | 11.132     | 18.3724   | 0             | 1         | 1         |
| Pknox2_j3   | 1.80154    | 2.555     | 0             | 1         | 1         |
| Pknox2_j4   | 4.04275    | 3.91521   | 0             | 1         | 1         |
| Nrgn_j1     | 0.0319153  | 0.179429  | 2.4911        | 0.095359  | 0.381256  |
| Nrgn_j2     | 0.694033   | 1.12921   | 0.702236      | 0.142941  | 0.469839  |
| Gramd1b_j15 | 18.8712    | 19.1088   | 0             | 1         | 1         |
| AK089373_j2 | 0.458987   | 0.533388  | 0.216733      | 0.28328   | 0.631732  |
| Ubash3b_j2  | 0.124383   | 1.04127   | 0             | 1         | 1         |
| Ubash3b_j6  | 0          | 0.883019  | 0             | 1         | 1         |
| Sorl1_j6    | 8.37027    | 5.78055   | 0             | 1         | 1         |
| Tecta_j2    | 0.948253   | 1.98278   | 1.06418       | 2.32E-08  | 1.50E-06  |
| Tbcel       | 0.233639   | 0.856356  | 0             | 1         | 1         |
| Oaf_j1      | 0.343896   | 0.671746  | 0.965943      | 0.0007924 | 0.0118988 |
| XLOC_034776 | 0.00829556 | 0.0478565 | 2.5283        | 0.288834  | 1         |
| XLOC_034776 | 0          | 0.0583808 | 1.79769e+308  | 0.0667073 | 1         |
| XLOC_034776 | 0.0159529  | 0.0517704 | 1.69831       | 0.515655  | 1         |
| XLOC_034777 | 0.13762    | 0.146049  | 0.0857622     | 0.896411  | 0.967019  |
| Hinfp_j10   | 0.186497   | 0.209399  | 0             | 1         | 1         |
| C2cd2l_j1   | 3.75309    | 4.40865   | 0.232259      | 0.146159  | 0.474441  |
| Hmbs_j6     | 2.05716    | 2.08051   | 0.0162861     | 0.953741  | 0.98654   |
| Vps11_j4    | 0          | 0.0938919 | 0             | 1         | 1         |
| Phldb1_j17  | 1.1046     | 1.35828   | 0             | 1         | 1         |
| Phldb1_j18  | 0          | 0.0529661 | 0             | 1         | 1         |
| Tmem25_j4   | 5.95579    | 10.7276   | 0             | 1         | 1         |
| Mll1_j4     | 0.0153505  | 0.24727   | 0             | 1         | 1         |
| Ube4a_j5    | 2.31377    | 2.10466   | 0             | 1         | 1         |
| Gm10684_j5  | 0.0875914  | 0.0763029 | 0             | 1         | 1         |
| Il10ra      | 0          | 0.117982  | 1.79769e+308  | 0.0099246 | 1         |
| Cep164_j7   | 1.28064    | 1.81309   | 0.501584      | 0.0146836 | 0.113125  |

|                  |            |           |              |           |           |
|------------------|------------|-----------|--------------|-----------|-----------|
| Sidt2_j2         | 2.34769    | 3.85156   | 0            | 1         | 1         |
| Sidt2_j3         | 2.08809    | 4.34715   | 0            | 1         | 1         |
| Sidt2_j4         | 0.317763   | 0.405407  | 0            | 1         | 1         |
| XLOC_034805      | 0          | 0.0640769 | 1.79769e+308 | 0.0749703 | 1         |
| XLOC_034805      | 0.179056   | 0.0882683 | -1.02044     | 0.440243  | 0.749566  |
| XLOC_034806      | 0.159865   | 0.137205  | -0.220527    | 0.844186  | 0.950736  |
| Fam55b_j5        | 1.03452    | 0.965715  | -0.0992915   | 0.755333  | 0.915526  |
| Fam55b_j6        | 0.461512   | 0.659143  | 0.514224     | 0.311662  | 0.656252  |
| Ncam1            | 2.70566    | 1.71253   | 0            | 1         | 1         |
| Ncam1_j8         | 2.03036    | 1.89748   | 0            | 1         | 1         |
| AU019823_j4      | 0.198578   | 0.168335  | -0.238364    | 0.852742  | 0.953341  |
| Rab39_j3         | 8.38524    | 8.17929   | -0.035876    | 0.785786  | 0.928253  |
| Acsbg1_j1        | 0.286771   | 0.249269  | 0            | 1         | 1         |
| Wdr61            | 3.10631    | 4.78247   | 0            | 1         | 1         |
| C230081A13Rik_j1 | 4.28019    | 4.49533   | 0.0707546    | 0.536085  | 0.806487  |
| C230081A13Rik_j2 | 0.396582   | 0.213984  | -0.890115    | 0.0039473 | 0.0424979 |
| C230081A13Rik    | 0.395855   | 0.292879  | -0.434666    | 0.11777   | 0.427121  |
| Lingo1_j5        | 8.1408     | 9.89214   | 0            | 1         | 1         |
| Ppcdc_j1         | 0.665801   | 0.691496  | 0            | 1         | 1         |
| Ppcdc_j3         | 2.31855    | 2.20184   | 0            | 1         | 1         |
| Scamp5_j6        | 1.66905    | 1.37083   | 0            | 1         | 1         |
| Scamp5_j7        | 2.18254    | 1.18973   | 0            | 1         | 1         |
| Clk3_j5          | 10.514     | 11.8506   | 0.172639     | 0.243128  | 0.590533  |
| Clk3_j6          | 1.27407    | 2.43264   | 0.933079     | 0.0008043 | 0.0120367 |
| Clk3_j7          | 1.71885    | 1.50083   | -0.195679    | 0.541465  | 0.809481  |
| Clk3_j8          | 3.67699    | 4.2333    | 0.203257     | 0.343428  | 0.683419  |
| Islr_j1          | 0.524444   | 1.24255   | 1.24444      | 0.0011332 | 0.0158045 |
| 2410076l21Rik_j2 | 0.0839585  | 0.0659424 | 0            | 1         | 1         |
| Arih1_j2         | 0.540564   | 0.236675  | 0            | 1         | 1         |
| AK038653_j7      | 0          | 0.0618221 | 1.79769e+308 | 0.0633125 | 1         |
| Lrrc49           | 5.16309    | 4.54444   | -0.184131    | 0.137407  | 0.461074  |
| Kif23_j8         | 0.131193   | 0.12217   | -0.102793    | 0.874346  | 1         |
| Paqr5            | 3.39761    | 2.7925    | -0.282963    | 0.0788612 | 0.340586  |
| Coro2b_j1        | 37.9698    | 38.3075   | 0            | 1         | 1         |
| Pias1_j1         | 2.86931    | 4.05576   | 0            | 1         | 1         |
| Map2k5_j1        | 0.162163   | 0.631133  | 1.9605       | 0.109447  | 0.411765  |
| Dis3l_j2         | 1.25164    | 1.65138   | 0            | 1         | 1         |
| Dis3l            | 0.443031   | 0.291603  | 0            | 1         | 1         |
| Rab11a_j6        | 90.0317    | 88.7826   | -0.0201563   | 0.839313  | 0.948864  |
| Ptplad1_j2       | 22.8416    | 21.9991   | 0            | 1         | 1         |
| Zfp609_j2        | 1.25151    | 1.39072   | 0            | 1         | 1         |
| Trip4_j1         | 0.0713854  | 0.228795  | 1.68035      | 0.003845  | 0.0416841 |
| Snx1_j2          | 12.406     | 15.0092   | 0.27481      | 0.154135  | 0.487096  |
| Usp3_j2          | 0          | 0.0566322 | 0            | 1         | 1         |
| Tln2_j1          | 6.66568    | 6.88139   | 0            | 1         | 1         |
| Rnf111_j7        | 3.28756    | 2.62684   | 0            | 1         | 1         |
| Gcom1_j4         | 0.00018111 | 0.110246  | 9.24964      | 0.850898  | 1         |

|                  |             |           |              |           |           |
|------------------|-------------|-----------|--------------|-----------|-----------|
| Cgnl1_j1         | 0.678062    | 0.749492  | 0            | 1         | 1         |
| Tcf12_j8         | 0.326298    | 0.625309  | 0            | 1         | 1         |
| Scg3_j5          | 137.693     | 145.888   | 0            | 1         | 1         |
| Lrrc1_j4         | 0.000448166 | 0.0536374 | 6.90306      | 0.660237  | 1         |
| Fbxo9_j4         | 0.0513163   | 0.34194   | 2.73625      | 0.0187744 | 0.135055  |
| Slc17a5_j1       | 0.845173    | 1.25245   | 0.567436     | 0.0464062 | 0.246963  |
| Col12a1_j1       | 1.21575     | 1.03284   | -0.235237    | 0.480369  | 0.774173  |
| Col12a1_j2       | 1.59469     | 1.56681   | -0.0254545   | 0.886515  | 0.964026  |
| Filip1_j7        | 0           | 2.0773    | 1.79769e+308 | 2.09E-22  | 6.29E-20  |
| Phip_j6          | 2.34738     | 2.89108   | 0            | 1         | 1         |
| Phip_j7          | 0.425533    | 0.592388  | 0            | 1         | 1         |
| Lca5_j5          | 0           | 0.135992  | 1.79769e+308 | 0.0020234 | 1         |
| Lca5_j7          | 0.00203641  | 0.190843  | 6.55021      | 0.0489361 | 0.254765  |
| Ibtk_j5          | 0.491035    | 0.522512  | 0            | 1         | 1         |
| Ibtk_j8          | 0.246779    | 0.159949  | 0            | 1         | 1         |
| Me1_j6           | 48.3922     | 50.4779   | 0.0608769    | 0.524233  | 0.799783  |
| Snap91_j5        | 10.1841     | 20.665    | 0            | 1         | 1         |
| 4922501C03Rik_j6 | 0           | 0.131142  | 1.79769e+308 | 9.37E-05  | 1         |
| Syncrip_j8       | 0.52834     | 0.290502  | 0            | 1         | 1         |
| 2810026P18Rik_j1 | 0.830447    | 1.39672   | 0.750084     | 0.0698996 | 0.317323  |
| AF529169_j6      | 0.717071    | 0.69842   | 0            | 1         | 1         |
| AF529169_j8      | 0.261346    | 0.25993   | 0            | 1         | 1         |
| AF529169_j7      | 0.0334043   | 0.0548285 | 0            | 1         | 1         |
| Morf4l1_j5       | 0.385576    | 0.501256  | 0.37853      | 0.487116  | 0.778145  |
| Morf4l1_j6       | 0           | 0.0511771 | 1.79769e+308 | 0.152543  | 1         |
| Tbc1d2b_j2       | 2.87462     | 2.87044   | -0.00210012  | 0.989885  | 0.996861  |
| 1190002N15Rik_j1 | 10.5566     | 7.89008   | 0            | 1         | 1         |
| Trpc1_j3         | 2.70005     | 3.23217   | 0            | 1         | 1         |
| Trpc1_j4         | 2.77416     | 2.80813   | 0            | 1         | 1         |
| Pls1_j4          | 3.37665     | 2.07896   | 0            | 1         | 1         |
| Atp1b3_j2        | 0           | 0.0757111 | 0            | 1         | 1         |
| XLOC_034997      | 0           | 0.0551745 | 1.79769e+308 | 0.106673  | 1         |
| Rasa2_j2         | 0.251248    | 0.416786  | 0            | 1         | 1         |
| Slc25a36_j5      | 1.27952     | 1.56015   | 0            | 1         | 1         |
| Slc25a36_j6      | 7.34127     | 5.77055   | 0            | 1         | 1         |
| Pik3cb_j7        | 0.200655    | 0.188977  | 0            | 1         | 1         |
| Esyt3            | 0.20644     | 0.104785  | -0.978287    | 0.0922952 | 0.373884  |
| Mras_j3          | 0           | 0.545002  | 1.79769e+308 | 1.27E-06  | 5.08E-05  |
| Tmem22_j1        | 10.8203     | 12.2088   | 0.174182     | 0.224555  | 0.571654  |
| Cep63_j5         | 1.44033     | 1.58437   | 0            | 1         | 1         |
| Uba5_j2          | 13.5096     | 15.1921   | 0.169338     | 0.137651  | 0.461429  |
| Dnajc13_j4       | 0           | 0.341088  | 0            | 1         | 1         |
| Glyctk_j4        | 0.206998    | 0.36527   | 0.819349     | 0.0699849 | 0.317561  |
| Glyctk_j5        | 0.0945135   | 0.169946  | 0.846483     | 0.153795  | 0.486579  |
| Ppm1m_j4         | 0           | 0.213221  | 1.79769e+308 | 0.0044719 | 0.0467118 |
| Ppm1m_j5         | 0           | 0.0540281 | 1.79769e+308 | 0.11678   | 1         |
| Tex264_j4        | 0           | 0.188534  | 0            | 1         | 1         |

|             |           |           |              |           |           |
|-------------|-----------|-----------|--------------|-----------|-----------|
| Rad54l2_j2  | 0         | 0.0577817 | 1.79769e+308 | 0.0043579 | 1         |
| Dock3_j1    | 0.478898  | 0.311608  | -0.619983    | 0.15954   | 0.493978  |
| Dock3_j3    | 0         | 0.667369  | 1.79769e+308 | 2.38E-15  | 4.93E-13  |
| Hemk1_j4    | 0.33219   | 0.398877  | 0.263932     | 0.603053  | 0.843243  |
| Cyb561d2_j1 | 0.0798449 | 0.0785169 | -0.0241963   | 0.989441  | 1         |
| Sema3b_j1   | 0.147939  | 0.192363  | 0.378832     | 0.419451  | 0.736105  |
| Sema3f_j4   | 1.39417   | 0.438739  | 0            | 1         | 1         |
| Sema3f      | 0.0340684 | 3.49651   | 0            | 1         | 1         |
| Rbm6_j6     | 0.712559  | 0.49177   | -0.535027    | 0.109592  | 0.41203   |
| Rnf123_j1   | 1.5502    | 1.87828   | 0            | 1         | 1         |
| Rnf123_j2   | 2.71221   | 2.63007   | 0            | 1         | 1         |
| Klhdc8b_j3  | 0.233984  | 0.170255  | 0            | 1         | 1         |
| P4htm_j5    | 8.33821   | 9.32527   | 0            | 1         | 1         |
| Arih2_j2    | 0.0433215 | 0.130124  | 0            | 1         | 1         |
| Arih2_j4    | 0         | 0.0755332 | 0            | 1         | 1         |
| Arih2_j3    | 0.55777   | 0.36169   | 0            | 1         | 1         |
| Atrip_j1    | 0         | 0.132035  | 1.79769e+308 | 0.0009224 | 1         |
| Ccdc72_j5   | 1.25916   | 1.06917   | 0            | 1         | 1         |
| Ptpn23_j5   | 0.306247  | 0.248729  | 0            | 1         | 1         |
| Nbeal2_j5   | 0.111152  | 0.327916  | 0            | 1         | 1         |
| Pth1r_j1    | 1.54538   | 3.14606   | 0            | 1         | 1         |
| Fbxl2_j1    | 0.151489  | 0.601864  | 0            | 1         | 1         |
| Cnot10_j5   | 0.363244  | 0.278732  | 0            | 1         | 1         |
| Gpd1l_j2    | 2.01332   | 4.21895   | 0            | 1         | 1         |
| Rbms3_j1    | 10.0806   | 6.10109   | 0            | 1         | 1         |
| XLOC_035100 | 0         | 1.04941   | 0            | 1         | 1         |
| XLOC_035100 | 0.844023  | 0.747901  | 0            | 1         | 1         |
| Plcd1_j5    | 0.739668  | 2.37433   | 0            | 1         | 1         |
| Scn10a_j4   | 160.639   | 145.287   | -0.144916    | 0.0940019 | 0.377783  |
| Scn10a_j5   | 42.8463   | 31.3976   | -0.448515    | 3.38E-07  | 1.57E-05  |
| Ulk4_j9     | 0.0879482 | 0.157487  | 0.840504     | 0.294363  | 0.641101  |
| Ulk4_j19    | 0.0601218 | 0.0518385 | -0.213864    | 0.881246  | 1         |
| Cck_j1      | 0.0477932 | 0.166295  | 1.79887      | 0.336897  | 0.677282  |
| AK089135_j2 | 0.274751  | 0.220199  | -0.319317    | 0.312992  | 0.657376  |
| Hhatl_j2    | 0.28034   | 0.214752  | -0.384502    | 0.627253  | 0.854539  |
| Gm9790_j1   | 3.89026   | 3.96384   | 0.0270341    | 0.896566  | 0.967033  |
| C85492_j1   | 16.1854   | 14.3481   | 0            | 1         | 1         |
| Slc6a20a_j3 | 0.0518412 | 0.130242  | 1.32903      | 0.205125  | 1         |
| Lztfl1_j7   | 0.206075  | 1.27337   | 2.6274       | 0.0076041 | 0.0700847 |
| Lztfl1_j8   | 0.590941  | 0.340179  | -0.796723    | 0.521275  | 0.798101  |
| Fyco1_j1    | 0.295706  | 0.124683  | -1.2459      | 0.0055854 | 0.0552523 |
| Fyco1_j4    | 0.078318  | 0.253171  | 1.6927       | 0.0002612 | 0.0047803 |
| Kbtbd3_j2   | 0.0623259 | 0.180751  | 1.5361       | 0.015399  | 0.117174  |
| XLOC_034122 | 0.450455  | 0.320768  | -0.48985     | 0.503081  | 0.786906  |
| Casp1_j3    | 0.0258129 | 1.47906   | 0            | 1         | 1         |
| Casp4_j2    | 0.186454  | 0.19197   | 0.0420627    | 0.962576  | 0.989507  |
| Casp4_j6    | 0         | 0.709031  | 1.79769e+308 | 0.0156648 | 0.118401  |

|             |           |           |              |           |           |
|-------------|-----------|-----------|--------------|-----------|-----------|
| Pdghd_j2    | 0.0971548 | 0.158128  | 0.702739     | 0.584394  | 0.833439  |
| Pdghd_j3    | 0         | 0.0959886 | 1.79769e+308 | 0.0211022 | 1         |
| Fam76b_j3   | 0.551002  | 0.396769  | 0            | 1         | 1         |
| Mre11a_j3   | 6.76E-05  | 0.298947  | 0            | 1         | 1         |
| Gpr83_j1    | 0         | 0.228988  | 1.79769e+308 | 0.0005944 | 0.0094166 |
| Chordc1_j2  | 20.9297   | 20.953    | 0.00160628   | 0.988975  | 0.996607  |
| Zfp846_j3   | 0.13059   | 0.10982   | 0            | 1         | 1         |
| Ubl5_j5     | 5.37339   | 5.77705   | 0            | 1         | 1         |
| Ppan_j2     | 0.99863   | 0.847633  | -0.23651     | 0.547243  | 0.813536  |
| Pde4a_j1    | 0.291126  | 0.194785  | -0.579765    | 0.201093  | 0.544463  |
| Ilf3        | 1.00641   | 2.29742   | 0            | 1         | 1         |
| Ccdc159_j2  | 0.667335  | 0.515699  | 0            | 1         | 1         |
| Bbs9        | 0.5143    | 0.5498    | 0.096297     | 0.788741  | 0.929506  |
| Bbs9_j5     | 0.0785616 | 0.130302  | 0.729967     | 0.377672  | 1         |
| Bbs9_j11    | 1.26152   | 1.3459    | 0.0934009    | 0.829512  | 0.944941  |
| Eepd1_j4    | 1.51631   | 3.28443   | 0            | 1         | 1         |
| Ncapd3      | 0.681517  | 0.874077  | 0.359011     | 0.0628181 | 0.296839  |
| AK077358_j1 | 0.0183242 | 0.248491  | 3.76137      | 0.0698907 | 0.317312  |
| XLOC_034193 | 0.563035  | 0.586462  | 0            | 1         | 1         |
| Zbtb44_j2   | 0.468706  | 0.239066  | -0.971273    | 0.0371209 | 0.21336   |
| Prdm10_j4   | 0.103959  | 0.0312563 | -1.7338      | 0.0643515 | 1         |
| Arhgap32_j7 | 4.55098   | 4.3978    | -0.049395    | 0.673806  | 0.877026  |
| Cdon_j4     | 0         | 0.460792  | 1.79769e+308 | 1.01E-05  | 0.0003112 |
| Fez1_j4     | 0         | 0.280136  | 0            | 1         | 1         |
| Tmem218_j1  | 0.277193  | 0.524204  | 0.91924      | 0.0506737 | 0.26072   |
| XLOC_034215 | 0.10573   | 0.175783  | 0.733401     | 0.196191  | 0.538985  |
| Robo4_j2    | 0         | 0.0678354 | 1.79769e+308 | 0.0328421 | 1         |
| Robo4_j1    | 0.0456506 | 0.0712074 | 0.641393     | 0.529034  | 1         |
| Siae_j1     | 2.25488   | 1.41949   | -0.667686    | 0.0001372 | 0.002789  |
| XLOC_034221 | 0.137117  | 0.199091  | 0.538018     | 0.278981  | 0.627636  |
| Zfp202      | 0         | 0.0705527 | 1.79769e+308 | 0.0257021 | 1         |
| Zfp202      | 1.20E-05  | 0.0891037 | 12.8638      | 0.976015  | 1         |
| Hspa8       | 233.59    | 236.054   | 0.0151359    | 0.868211  | 0.958254  |
| Hspa8_j1    | 18.9045   | 23.8978   | 0.338152     | 0.0008993 | 0.0131604 |
| AK014147_j1 | 0.0454047 | 0.343824  | 2.92075      | 0.000482  | 0.007901  |
| Trim29_j1   | 0         | 0.068033  | 1.79769e+308 | 0.0856597 | 1         |
| Usp2        | 0.443857  | 0.623346  | 0            | 1         | 1         |
| Usp2_j1     | 0.0988876 | 0.133345  | 0            | 1         | 1         |
| Mcam_j6     | 17.8071   | 18.9696   | 0            | 1         | 1         |
| Hyou1_j1    | 0.240189  | 0.306944  | 0.353808     | 0.475895  | 0.771711  |
| Rps25_j2    | 6.48756   | 7.39608   | 0            | 1         | 1         |
| Ddx6_j1     | 0.852089  | 0.726924  | -0.229199    | 0.417416  | 0.734518  |
| Ddx6_j4     | 7.87513   | 8.75134   | 0.152201     | 1         | 1         |
| Ift46       | 1.31656   | 1.21204   | 0            | 1         | 1         |
| Mpzl2_j1    | 0         | 0.058378  | 1.79769e+308 | 0.180674  | 1         |
| Scn4b_j2    | 9.46068   | 8.40785   | 0            | 1         | 1         |
| Fxyd6_j1    | 16.5288   | 23.8526   | 0            | 1         | 1         |

|                  |            |           |              |           |           |
|------------------|------------|-----------|--------------|-----------|-----------|
| Fxyd6_j3         | 8.56043    | 12.9577   | 0            | 1         | 1         |
| Dscaml1_j3       | 0.0472305  | 0.133222  | 1.49604      | 0.11106   | 1         |
| Zfp259_j3        | 8.97347    | 12.7257   | 0.504006     | 0.0404748 | 0.225632  |
| XLOC_034274      | 3.23344    | 1.73585   | 0            | 1         | 1         |
| Fam55d_j3        | 0          | 0.0558706 | 1.79769e+308 | 0.113773  | 1         |
| Drd2_j5          | 0.0378857  | 0.0611651 | 0.691057     | 0.610005  | 1         |
| Il18_j2          | 1.35537    | 1.53558   | 0.180103     | 0.692303  | 0.886092  |
| XLOC_034289      | 0.0313478  | 0.0806558 | 1.36342      | 0.204572  | 1         |
| 4930550C14Rik_j4 | 0.149753   | 0.042404  | -1.82031     | 0.425428  | 0.74056   |
| Agphd1_j1        | 0.0341667  | 0.0892738 | 1.38565      | 0.264497  | 1         |
| Psm4_j3          | 0.321909   | 0.248512  | -0.373336    | 0.584719  | 0.833564  |
| Psm4_j5          | 0.09947    | 0.159882  | 0.684676     | 0.50244   | 0.786414  |
| Fbxo22_j1        | 13.5713    | 12.7132   | -0.0942318   | 0.442909  | 0.751088  |
| Al118078_j6      | 0          | 0.236777  | 1.79769e+308 | 0.00849   | 0.0758125 |
| Isl2_j1          | 60.8846    | 49.5382   | -0.297538    | 0.0011888 | 0.0164246 |
| Ptpn9_j3         | 0          | 0.445644  | 0            | 1         | 1         |
| Sin3a_j2         | 0.115117   | 0.0539369 | 0            | 1         | 1         |
| Sin3a_j3         | 2.85658    | 3.61431   | 0            | 1         | 1         |
| Ulk3_j5          | 0.0648523  | 0.173886  | 1.42291      | 0.348392  | 0.686685  |
| Sema7a_j3        | 0.542582   | 0.165785  | -1.71053     | 0.043316  | 0.236191  |
| Stra6            | 0          | 0.0501445 | 1.79769e+308 | 0.0459169 | 1         |
| Stoml1_j2        | 0          | 0.644123  | 1.79769e+308 | 9.69E-05  | 0.0020966 |
| Hexa_j1          | 2.36009    | 2.02902   | 0            | 1         | 1         |
| Celf6_j4         | 1.69378    | 1.31425   | -0.366006    | 0.361946  | 0.696328  |
| Parp6            | 0.99333    | 0.5694    | 0            | 1         | 1         |
| Uaca_j10         | 0.532117   | 1.02605   | 0            | 1         | 1         |
| Tle3_j4          | 0.145898   | 0.174649  | 0            | 1         | 1         |
| Anp32a_j2        | 0          | 0.328823  | 0            | 1         | 1         |
| Itga11_j1        | 0          | 0.0581344 | 1.79769e+308 | 0.04727   | 1         |
| Itga11_j2        | 0.0534147  | 0.0959206 | 0.844605     | 0.40098   | 1         |
| Rpl4_j2          | 0          | 0.37839   | 0            | 1         | 1         |
| Megf11_j1        | 0          | 0.0669352 | 1.79769e+308 | 0.0668028 | 1         |
| Igdcc4_j1        | 0          | 0.170058  | 0            | 1         | 1         |
| Igdcc4_j4        | 0.00019741 | 0.173418  | 0            | 1         | 1         |
| Igdcc3_j7        | 0.288199   | 0.327045  | 0.182423     | 0.712503  | 0.895781  |
| Igdcc3_j8        | 0.0104942  | 0.134002  | 3.67458      | 0.28537   | 1         |
| Cilp_j2          | 0          | 0.250118  | 1.79769e+308 | 4.30E-05  | 0.0010469 |
| Cilp_j5          | 0.283518   | 0.137707  | -1.04184     | 0.099502  | 0.390484  |
| Rasl12_j1        | 0          | 0.0943412 | 1.79769e+308 | 0.0353161 | 1         |
| Mtfmt_j1         | 0.0644608  | 0.112499  | 0.803415     | 0.629242  | 1         |
| Mtfmt_j5         | 0.262799   | 0.292416  | 0.154058     | 0.660811  | 0.871365  |
| Csnk1g1_j6       | 0.0569085  | 0.0627783 | 0.141623     | 0.847963  | 1         |
| Csnk1g1_j5       | 0.838873   | 1.04151   | 0.312157     | 0.150865  | 0.481595  |
| Herc1_j8         | 0.961332   | 0.720269  | 0            | 1         | 1         |
| Herc1_j10        | 6.72821    | 6.29245   | 0            | 1         | 1         |
| Rora_j1          | 0          | 0.241753  | 1.79769e+308 | 3.40E-08  | 2.11E-06  |
| Narg2_j7         | 0          | 0.0712176 | 1.79769e+308 | 0.106341  | 1         |



|                  |            |           |              |           |           |
|------------------|------------|-----------|--------------|-----------|-----------|
| Bnip2_j1         | 0.27091    | 0.35189   | 0.377312     | 0.300467  | 0.647066  |
| Myo1e_j3         | 0          | 0.0971382 | 1.79769e+308 | 0.0099779 | 1         |
| Sltm_j6          | 0.159777   | 1.68614   | 0            | 1         | 1         |
| Znf280d_j3       | 0.181726   | 0.22771   | 0.325433     | 0.637161  | 0.859508  |
| Nedd4_j4         | 70.4338    | 79.5655   | 0            | 1         | 1         |
| Rab27a_j1        | 4.70948    | 5.78941   | 0            | 1         | 1         |
| 2410004A20Rik_j1 | 0.0817851  | 0.0927689 | 0.181803     | 0.84263   | 1         |
| XLOC_034413      | 0.417708   | 0.612546  | 0.552323     | 0.267004  | 0.616066  |
| Onecut1_j1       | 1.57858    | 0.727488  | 0            | 1         | 1         |
| Gnb5_j2          | 0          | 0.114846  | 1.79769e+308 | 0.11382   | 1         |
| Leo1_j1          | 8.02966    | 9.99265   | 0.315529     | 0.0131129 | 0.104699  |
| Hmgcl1_j2        | 0.611495   | 1.12223   | 0            | 1         | 1         |
| Elov15_j6        | 0          | 0.181767  | 1.79769e+308 | 0.0958102 | 0.382213  |
| Ick_j2           | 0          | 0.310678  | 0            | 1         | 1         |
| AK050586_j3      | 0.00118601 | 0.142155  | 6.9052       | 0.389364  | 1         |
| XLOC_034437      | 17.1189    | 17.9737   | 0.0703006    | 0.776196  | 0.924322  |
| Senp6_j7         | 0.148182   | 0.0802695 | 0            | 1         | 1         |
| Myo6_j2          | 0.5631     | 0.739148  | 0.392471     | 0.0848296 | 0.355514  |
| Myo6_j7          | 0.605547   | 0.559527  | -0.114033    | 0.658606  | 0.870342  |
| XLOC_034443      | 0.0512149  | 0.153038  | 1.57925      | 0.199151  | 1         |
| AK162636         | 0.282078   | 0.623839  | 0            | 1         | 1         |
| Mei4             | 0.0378855  | 0.158573  | 2.06543      | 0.083594  | 0.352466  |
| Tpbj1            | 0.240988   | 1.09076   | 2.1783       | 3.69E-07  | 1.70E-05  |
| Dopey1_j4        | 0.116915   | 0.155588  | 0            | 1         | 1         |
| Cyb5r4_j6        | 0.0485286  | 0.0718323 | 0.565798     | 0.725923  | 1         |
| XLOC_034463      | 0.0379145  | 0.179634  | 2.24424      | 0.0762824 | 0.333677  |
| Trim43a_j1       | 0.340964   | 0.258414  | -0.399937    | 0.489544  | 0.779561  |
| Rasgrf1_j1       | 0.414238   | 0.474565  | 0            | 1         | 1         |
| Ctsh_j1          | 0.696086   | 2.34373   | 1.75147      | 5.46E-06  | 0.0001827 |
| XLOC_034474      | 6.67209    | 7.10806   | 0.0913177    | 0.607904  | 0.845368  |
| Plscr1_j2        | 0.196806   | 0.31512   | 0.679131     | 0.3788    | 0.710354  |
| Plod2_j3         | 0.495816   | 0.524905  | 0.0822514    | 0.792681  | 0.931005  |
| Plod2_j4         | 1.05019    | 1.01807   | -0.0448223   | 0.876582  | 0.960772  |
| Tfdp2_j5         | 0.315397   | 0.150559  | 0            | 1         | 1         |
| AK089981_j5      | 0.00715327 | 0.0685184 | 3.25982      | 0.418372  | 1         |
| Nmnat3_j1        | 0.0787735  | 0.232973  | 1.56438      | 0.0529283 | 0.267435  |
| Cep70_j3         | 0.294169   | 0.261248  | -0.171227    | 0.771961  | 0.922593  |
| Dbr1_j2          | 0.514029   | 0.817203  | 0.668844     | 0.120984  | 0.433073  |
| Dzip1l_j9        | 0.0983868  | 0.2247    | 1.19146      | 0.106728  | 0.405895  |
| Dzip1l_j10       | 0.200502   | 0.2223    | 0.148891     | 0.793112  | 0.931055  |
| Slco2a1_j1       | 0.282007   | 0.274679  | -0.0379822   | 0.953292  | 0.986435  |
| Cpne4_j1         | 12.1046    | 9.78417   | 0            | 1         | 1         |
| Aste1            | 0          | 0.12845   | 1.79769e+308 | 0.0126187 | 1         |
| Rpl29_j1         | 40.7712    | 49.2812   | 0.273486     | 0.0032211 | 0.0364935 |
| Pcbp4_j2         | 0          | 0.158781  | 0            | 1         | 1         |
| Rrp9_j1          | 0.0994092  | 0.343545  | 1.78905      | 0.0458261 | 0.244934  |
| Vprbp_j3         | 2.49502    | 1.25175   | 0            | 1         | 1         |

|              |             |           |              |           |          |
|--------------|-------------|-----------|--------------|-----------|----------|
| Cacna2d2_j13 | 1.66869     | 1.38856   | 0            | 1         | 1        |
| Cacna2d2_j12 | 0.986582    | 0.950548  | 0            | 1         | 1        |
| Cacna2d2_j14 | 2.61281     | 2.47517   | 0            | 1         | 1        |
| Nprl2_j3     | 1.02842     | 0.468318  | -1.13487     | 0.0422525 | 0.232358 |
| Mst1r_j5     | 0.0972772   | 0.138961  | 0.514506     | 0.404467  | 1        |
| Camkv_j4     | 1.99E-05    | 0.143748  | 12.8194      | 0.981194  | 1        |
| Traip_j1     | 0           | 0.0787447 | 1.79769e+308 | 0.0318383 | 1        |
| Uba7_j7      | 0.584515    | 0.498074  | -0.230878    | 0.532458  | 0.804257 |
| Ip6k1_j1     | 28.5023     | 28.5747   | 0            | 1         | 1        |
| Amt_j4       | 23.5514     | 25.1477   | 0            | 1         | 1        |
| Rhoa_j2      | 40.156      | 43.0241   | 0            | 1         | 1        |
| Gpx1_j1      | 66.6901     | 70.9338   | 0.0890007    | 0.395636  | 0.720735 |
| Lamb2_j3     | 0.790292    | 0.520882  | 0            | 1         | 1        |
| Usp19_j7     | 1.77062     | 1.46914   | 0            | 1         | 1        |
| Qars_j1      | 4.10467     | 3.76396   | 0            | 1         | 1        |
| Impdh2_j1    | 0           | 0.296071  | 0            | 1         | 1        |
| Dalrd3_j1    | 4.96304     | 5.16295   | 0            | 1         | 1        |
| Prkar2a_j1   | 23.3566     | 25.6895   | 0            | 1         | 1        |
| Ip6k2_j1     | 11.1502     | 15.3778   | 0            | 1         | 1        |
| Celsr3_j11   | 0.611611    | 0.670749  | 0            | 1         | 1        |
| Slc26a6_j9   | 0.424158    | 0.705955  | 0.734975     | 0.092827  | 0.374785 |
| Col7a1_j6    | 0.425331    | 0.570071  | 0.422553     | 0.3388    | 0.679008 |
| Plxnb1_j6    | 0.150837    | 0.484315  | 0            | 1         | 1        |
| Cdc25a_j2    | 1.05445     | 1.29588   | 0            | 1         | 1        |
| Tmem103_j1   | 1.04242     | 1.08942   | 0.0636269    | 0.897581  | 0.967361 |
| Lrrfip2_j3   | 0.87213     | 0.914262  | 0            | 1         | 1        |
| Trank1_j4    | 0           | 0.101411  | 1.79769e+308 | 0.0028392 | 1        |
| Trank1_j5    | 0.275167    | 0.379932  | 0.465435     | 0.428795  | 0.742566 |
| Dclk3_j2     | 2.10124     | 5.09703   | 1.27842      | 2.16E-08  | 1.41E-06 |
| Clasp2_j5    | 3.95687     | 4.53431   | 0            | 1         | 1        |
| Cmtm6_j1     | 1.50562     | 3.88222   | 0            | 1         | 1        |
| Osbpl10_j7   | 3.53807     | 4.52095   | 0            | 1         | 1        |
| XLOC_034603  | 0.107742    | 0.120539  | 0            | 1         | 1        |
| Azi2_j2      | 7.05201     | 5.83252   | 0            | 1         | 1        |
| Golga4_j5    | 3.42114     | 3.79453   | 0.149446     | 0.224291  | 0.571479 |
| Vill_j4      | 0           | 0.0571123 | 1.79769e+308 | 0.0585783 | 1        |
| Vill         | 0.167817    | 0.119743  | -0.486946    | 0.491064  | 0.780237 |
| Acvr2b_j5    | 0.00690289  | 0.149868  | 4.44035      | 0.209348  | 1        |
| Myrip_j1     | 0.0827305   | 0.243326  | 0            | 1         | 1        |
| Myrip_j3     | 0.000145047 | 0.19851   | 0            | 1         | 1        |
| Rpl14_j7     | 34.9996     | 49.1861   | 0            | 1         | 1        |
| Ctnnb1_j1    | 0.196426    | 0.47898   | 0            | 1         | 1        |
| Nktr_j7      | 0.0730241   | 0.113606  | 0.637596     | 0.16652   | 1        |
| XLOC_034640  | 0.0135894   | 0.0482699 | 0            | 1         | 1        |
| XLOC_034643  | 1.62025     | 2.01405   | 0.313885     | 0.356592  | 0.692561 |
| XLOC_034646  | 0.0338351   | 0.13297   | 1.97451      | 0.223143  | 1        |
| D9Ert402e_j4 | 1.30347     | 1.39591   | 0            | 1         | 1        |

|             |           |           |              |           |           |
|-------------|-----------|-----------|--------------|-----------|-----------|
| Zfp167_j4   | 0         | 0.0870932 | 1.79769e+308 | 0.0132937 | 1         |
| Zfp167_j6   | 0.167682  | 0.142829  | -0.23144     | 0.704316  | 0.891839  |
| XLOC_034649 | 0.0528465 | 0.151648  | 1.52085      | 0.12629   | 1         |
| Zfp105_j3   | 0.0721362 | 0.151087  | 1.06658      | 0.30434   | 1         |
| Kif15_j3    | 0         | 0.0944248 | 1.79769e+308 | 0.0548022 | 1         |
| Tgm4_j1     | 0.874     | 0.725482  | -0.268694    | 0.152577  | 0.484296  |
| Birc3_j1    | 0.717018  | 0.686545  | -0.0626543   | 0.862043  | 0.956374  |
| AK129341_j5 | 0.543603  | 0.539026  | 0            | 1         | 1         |
| Cntn5_j6    | 0.272894  | 0.294353  | 0.10921      | 0.826002  | 0.943911  |
| Amotl1_j4   | 0.0769308 | 0.221751  | 0            | 1         | 1         |
| Panx1_j2    | 0         | 0.384828  | 0            | 1         | 1         |
| Naalad2_j1  | 0         | 0.0668834 | 1.79769e+308 | 0.0229928 | 1         |
| Naalad2_j7  | 0         | 0.19245   | 1.79769e+308 | 0.0055149 | 0.0546657 |
| Zfp26_j4    | 1.48546   | 1.38519   | 0            | 1         | 1         |
| Zfp426_j2   | 0.603737  | 0.803101  | 0            | 1         | 1         |
| Zfp426_j3   | 0.184951  | 0.492953  | 0            | 1         | 1         |
| Zfp266_j3   | 1.40316   | 0.996296  | 0            | 1         | 1         |
| Zfp266_j4   | 0.142246  | 0.148729  | 0            | 1         | 1         |
| Fbxl12_j2   | 0.264074  | 0.376027  | 0            | 1         | 1         |
| Col5a3_j8   | 0.338035  | 4.63271   | 0            | 1         | 1         |
| Col5a3_j9   | 0.57141   | 1.47552   | 0            | 1         | 1         |
| Angptl6_j3  | 1.74238   | 1.89679   | 0.122505     | 0.62922   | 0.855844  |
| Zglp1_j1    | 0.14603   | 0.209766  | 0.522518     | 0.497376  | 0.783786  |
| Zglp1_j3    | 0.0582893 | 0.108678  | 0.898753     | 0.434724  | 1         |
| Tyk2_j7     | 0.234115  | 0.476054  | 0            | 1         | 1         |
| Cdc37_j3    | 0.835761  | 0.584282  | -0.516425    | 0.207644  | 0.551986  |
| Yipf2_j5    | 0.478254  | 0.935533  | 0            | 1         | 1         |
| Spc24_j3    | 5.70E-05  | 0.273523  | 12.2291      | 0.98426   | 0.995386  |
| Kank2_j1    | 1.79701   | 2.02152   | 0            | 1         | 1         |
| Dock6_j13   | 0.0807932 | 0.237034  | 0            | 1         | 1         |
| Dock6_j14   | 0         | 0.0568989 | 0            | 1         | 1         |
| Epor        | 0.0694539 | 0.164864  | 1.24715      | 0.267859  | 0.616526  |
| Rgl3_j4     | 0.191816  | 0.221344  | 0.206573     | 0.695273  | 0.887572  |
| Zfp653_j3   | 0.0839422 | 0.141837  | 0.756766     | 0.263963  | 1         |
| Acp5_j1     | 0         | 0.0519653 | 1.79769e+308 | 0.142616  | 1         |
| Adamts15_j1 | 0.244187  | 0.566253  | 0            | 1         | 1         |
| Foxred1_j3  | 1.79248   | 2.46298   | 0            | 1         | 1         |
| Chek1_j2    | 0.0565998 | 0.11133   | 0.975972     | 0.360106  | 1         |
| Pknx2_j5    | 0.933682  | 1.03718   | 0            | 1         | 1         |
| AW551984_j1 | 0.283362  | 0.602252  | 1.08772      | 0.0021466 | 0.0263682 |
| Gramd1b_j11 | 0.473745  | 1.53523   | 0            | 1         | 1         |
| Gramd1b_j12 | 1.50577   | 4.22442   | 0            | 1         | 1         |
| Ubash3b_j3  | 0         | 0.128617  | 0            | 1         | 1         |
| Sorl1_j4    | 6.06487   | 3.66283   | 0            | 1         | 1         |
| Sorl1_j5    | 0.348281  | 1.27824   | 0            | 1         | 1         |
| Arhgef12_j2 | 0.0717954 | 0.10859   | 0            | 1         | 1         |
| Arhgef12_j4 | 0         | 1.26291   | 0            | 1         | 1         |

|                  |             |           |               |           |           |
|------------------|-------------|-----------|---------------|-----------|-----------|
| Tmem136_j4       | 0.133157    | 0.228445  | 0             | 1         | 1         |
| Oaf_j2           | 4.13941     | 5.28159   | 0.351549      | 0.0574374 | 0.280785  |
| XLOC_034774      | 0.0600919   | 0.301708  | 2.32791       | 0.019748  | 0.139687  |
| XLOC_034775      | 0           | 0.560419  | 1.79769e+308  | 7.14E-05  | 0.0016096 |
| XLOC_034775      | 0.0609861   | 0.0614496 | 0.0109247     | 0.993938  | 1         |
| Nlrx1            | 7.60E-05    | 0.318792  | 0             | 1         | 1         |
| Abcg4            | 11.0608     | 10.8338   | 0             | 1         | 1         |
| Hinfj_j6         | 0.242808    | 0.32083   | 0             | 1         | 1         |
| Hmbs_j3          | 0.152779    | 0.993802  | 2.70151       | 3.25E-09  | 2.48E-07  |
| Hmbs_j2          | 0.355878    | 0         | -1.79769e+308 | 1.00E-08  | 7.03E-07  |
| Vps11_j2         | 0           | 0.051765  | 0             | 1         | 1         |
| Phldb1_j2        | 0.102734    | 0.588645  | 0             | 1         | 1         |
| Phldb1_j7        | 0.338674    | 0.514485  | 0             | 1         | 1         |
| Arcn1_j2         | 3.64537     | 5.23973   | 0             | 1         | 1         |
| Mll1_j6          | 1.82054     | 1.55799   | 0             | 1         | 1         |
| Ube4a_j4         | 7.50718     | 11.7563   | 0             | 1         | 1         |
| Gm10684_j6       | 0.0589564   | 0.0912876 | 0             | 1         | 1         |
| Cep164_j11       | 1.00309     | 1.1723    | 0.224891      | 0.303043  | 0.648824  |
| Sidt2_j7         | 0.801664    | 1.45921   | 0             | 1         | 1         |
| Pafah1b2_j1      | 39.653      | 34.2588   | 0             | 1         | 1         |
| XLOC_034805      | 0           | 0.157739  | 1.79769e+308  | 0.0321223 | 0.194416  |
| XLOC_034806      | 0           | 0.277503  | 1.79769e+308  | 0.0001152 | 0.0024236 |
| XLOC_034807      | 0.857606    | 0.882886  | 0.041913      | 0.916519  | 0.973942  |
| Ncam1_j5         | 1.10068     | 3.54753   | 0             | 1         | 1         |
| AU019823_j1      | 0.262226    | 0.282902  | 0.109492      | 0.801183  | 0.933726  |
| Dlat_j1          | 2.66952     | 2.17714   | 0             | 1         | 1         |
| Hspb2            | 0.397824    | 0.455308  | 0.194713      | 0.739059  | 0.908322  |
| Hspb2            | 0.123481    | 0.154208  | 0.320583      | 0.720593  | 1         |
| 1110032A03Rik_j2 | 9.25129     | 8.47047   | -0.127212     | 0.392322  | 0.718644  |
| Layn_j3          | 0.196914    | 0.1522    | -0.371593     | 0.732515  | 0.905521  |
| AK086943_j4      | 0.195504    | 0.263731  | 0.431865      | 0.635301  | 0.85855   |
| AK086943_j5      | 0           | 0.175232  | 1.79769e+308  | 0.0710097 | 0.320392  |
| AK086943_j8      | 0.00787959  | 0.285915  | 5.18132       | 0.291537  | 0.638573  |
| Zc3h12c_j7       | 0           | 0.117298  | 1.79769e+308  | 0.0003377 | 1         |
| Elmod1_j1        | 0.000942837 | 0.0851571 | 6.49697       | 0.625725  | 1         |
| Dmxl2_j1         | 29.4084     | 29.2298   | 0             | 1         | 1         |
| Dmxl2_j3         | 7.72177     | 8.29018   | 0             | 1         | 1         |
| Dmxl2_j4         | 6.36898     | 5.03223   | 0             | 1         | 1         |
| Wdr61_j2         | 0.395484    | 0.509191  | 0             | 1         | 1         |
| Wdr61_j3         | 3.27501     | 3.56234   | 0             | 1         | 1         |
| Scaper_j3        | 5.66764     | 5.19256   | -0.126303     | 0.181277  | 0.521147  |
| Lingo1_j2        | 2.16145     | 2.77391   | 0             | 1         | 1         |
| Neil1_j2         | 0.103929    | 0.288181  | 1.47138       | 0.192928  | 0.535283  |
| Neil1_j3         | 0           | 0.0506752 | 1.79769e+308  | 0.11078   | 1         |
| 1700017B05Rik_j1 | 0.657858    | 0.779898  | 0.245509      | 0.426447  | 0.741228  |
| Scamp5_j3        | 8.67452     | 6.07887   | 0             | 1         | 1         |
| Scamp5_j2        | 2.94508     | 1.98021   | 0             | 1         | 1         |

|                   |            |                        |              |           |           |
|-------------------|------------|------------------------|--------------|-----------|-----------|
| Clk3_j11          | 0.42466    | 0.568737               | 0.421452     | 0.41256   | 0.731546  |
| Arid3b_j2         | 0.0269159  | 0.147748               | 2.45661      | 0.0111113 | 1         |
| Arid3b_j1         | 0          | 0.131218 1.79769e+308  |              | 0.0030565 | 1         |
| Islr2             | 0          | 0.11703 1.79769e+308   |              | 0.0075699 | 1         |
| Islr2_j4          | 0          | 0.296334 1.79769e+308  |              | 5.87E-05  | 0.0013639 |
| Islr2_j5          | 0          | 0.164223 1.79769e+308  |              | 0.0019596 | 0.024602  |
| Cd276             | 1.14037    | 1.40415                | 0.300193     | 0.186856  | 0.527873  |
| Neo1_j5           | 0.36368    | 1.02907                | 0            | 1         | 1         |
| Neo1_j6           | 2.48481    | 2.34773                | 0            | 1         | 1         |
| Bbs4_j2           | 1.36236    | 3.83053                | 0            | 1         | 1         |
| AK038653_j4       | 0.404966   | 0.248622               | -0.703845    | 0.151801  | 0.483091  |
| AK038653_j2       | 0          | 0.0486617 1.79769e+308 |              | 0.106113  | 1         |
| AK038653_j3       | 0          | 0.102248 1.79769e+308  |              | 0.0223161 | 1         |
| Lrrc49_j2         | 2.867      | 2.15201                | -0.413852    | 0.0304639 | 0.187623  |
| Lrrc49_j7         | 3.91402    | 2.23666                | -0.807303    | 0.0004419 | 0.007341  |
| Lrrc49_j8         | 0.114224   | 0.133719               | 0.227331     | 0.697448  | 1         |
| XLOC_034888       | 0.106215   | 0.0547944              | -0.954888    | 0.518095  | 1         |
| Rplp1_j2          | 2.11107    | 3.35292                | 0.667441     | 0.302767  | 0.648644  |
| Kif23_j6          | 0.201249   | 0.280253               | 0.477747     | 0.223858  | 0.571034  |
| Map2k5_j6         | 0          | 1.24089 1.79769e+308   |              | 7.62E-05  | 0.0017011 |
| XLOC_034902       | 0.10108    | 0.124719               | 0.303182     | 0.719772  | 1         |
| Zwilch_j1         | 0.332532   | 0.424886               | 0.353584     | 0.446159  | 0.75332   |
| Map2k1_j3         | 5.9854     | 6.85964                | 0            | 1         | 1         |
| Rab11a_j2         | 37.9129    | 40.8803                | 0.108718     | 0.391372  | 0.717906  |
| Snx22_j1          | 0.193499   | 0.386795               | 0            | 1         | 1         |
| Usp3_j4           | 1.86395    | 1.95078                | 0            | 1         | 1         |
| Rab8b_j1          | 2.77888    | 3.25775                | 0            | 1         | 1         |
| Tln2_j4           | 0          | 0.627194               | 0            | 1         | 1         |
| Tln2_j5           | 0.00193616 | 1.41578                | 0            | 1         | 1         |
| Fam63b            | 0.213013   | 0.529867               | 0            | 1         | 1         |
| Aqp9_j1           | 0.119703   | 0.287732               | 1.26526      | 0.0033492 | 0.0375783 |
| Gcom1_j2          | 0.0543931  | 0.174441               | 1.68124      | 0.259628  | 0.608462  |
| Cgnl1_j4          | 1.75932    | 2.46693                | 0            | 1         | 1         |
| Mapk6_j1          | 2.23992    | 3.28004                | 0            | 1         | 1         |
| Tmod2_j1          | 18.6652    | 22.683                 | 0            | 1         | 1         |
| Scg3_j7           | 0.138203   | 0.48814                | 0            | 1         | 1         |
| Scg3_j8           | 13.6399    | 16.2647                | 0            | 1         | 1         |
| 2310046A06Rik_j10 | 0          | 0.163291 1.79769e+308  |              | 0.05702   | 0.279743  |
| Lrrc1_j1          | 0.0893787  | 0.10937                | 0.291211     | 0.73092   | 1         |
| Fbxo9_j7          | 30.317     | 27.7169                | -0.129361    | 1         | 1         |
| Fbxo9_j8          | 28.7938    | 30.0967                | 0.0638467    | 0.746007  | 0.911562  |
| Col12a1_j5        | 0.0906933  | 0.165822               | 0.87057      | 0.337675  | 0.678175  |
| Cox7a2_j1         | 76.4047    | 76.7551                | 0.00660051   | 0.963566  | 0.989788  |
| Cox7a2_j2         | 149.518    | 149.475                | -0.000423648 | 0.996429  | 0.999052  |
| Filip1_j1         | 0          | 0.0730225 1.79769e+308 |              | 0.002395  | 1         |
| Phip_j1           | 0.106234   | 0.0904089              | 0            | 1         | 1         |
| Phip_j2           | 0.0756385  | 0.118557               | 0            | 1         | 1         |

|                  |            |                        |            |           |           |
|------------------|------------|------------------------|------------|-----------|-----------|
| Hmgn3_j2         | 5.21634    | 7.79677                | 0          | 1         | 1         |
| Hmgn3_j3         | 0.34343    | 0.194378               | 0          | 1         | 1         |
| XLOC_034962      | 2.69723    | 2.97549                | 0          | 1         | 1         |
| Ube2cbp_j2       | 0          | 0.0979567 1.79769e+308 | 0.0412133  |           | 1         |
| Snap91_j7        | 5.50755    | 5.55847                | 0          | 1         | 1         |
| Snap91_j8        | 3.39849    | 12.7551                | 0          | 1         | 1         |
| Snap91_j9        | 6.24422    | 6.33027                | 0          | 1         | 1         |
| 4922501C03Rik_j3 | 0          | 0.073311 1.79769e+308  | 0.002251   |           | 1         |
| Syncrip_j9       | 0.159803   | 0.699304               | 0          | 1         | 1         |
| Ankrd34c_j3      | 1.95686    | 0.974878               | -1.00525   | 8.99E-07  | 3.79E-05  |
| Morf4l1_j2       | 17.4829    | 18.5291                | 0.0838493  | 0.590203  | 0.836402  |
| Morf4l1_j8       | 0.163016   | 0.124126               | -0.393203  | 0.711137  | 0.894998  |
| Morf4l1_j7       | 0          | 0.0900161 1.79769e+308 | 0.0847383  |           | 1         |
| Atp1b3_j5        | 20.074     | 29.0858                | 0          | 1         | 1         |
| Rnf7_j3          | 78.4507    | 75.6323                | -0.0527838 | 0.598054  | 0.840532  |
| XLOC_034997      | 0          | 0.100895 1.79769e+308  | 0.0634981  |           | 1         |
| Esyt3_j3         | 0.00949439 | 0.128594               | 3.75961    | 0.0253413 | 1         |
| Esyt3_j4         | 0          | 0.061291 1.79769e+308  | 0.017686   |           | 1         |
| Cep63_j6         | 0.291303   | 2.25121                | 0          | 1         | 1         |
| Trf_j1           | 8.47656    | 15.6795                | 0.887326   | 3.93E-14  | 6.94E-12  |
| Dnajc13_j1       | 11.4588    | 11.4087                | 0          | 1         | 1         |
| Glyctk_j6        | 3.77E-05   | 0.198227               | 12.3591    | 0.926012  | 0.97702   |
| Glyctk_j7        | 0          | 0.141501 1.79769e+308  | 0.0016617  |           | 1         |
| Tex264_j2        | 3.4662     | 5.59156                | 0          | 1         | 1         |
| Rad54l2_j3       | 0.169838   | 0.157263               | -0.110978  | 0.78633   | 0.928557  |
| Mapkapk3_j3      | 0.160007   | 0.168461               | 0.0742794  | 0.919583  | 0.974745  |
| Hemk1_j2         | 0.256773   | 0.48439                | 0.915673   | 0.114833  | 0.421681  |
| Slc38a3_j1       | 0.109902   | 0.13897                | 0.338554   | 0.638034  | 1         |
| Sema3f_j2        | 0.0266479  | 0.676441               | 0          | 1         | 1         |
| Rbm6_j1          | 0.902336   | 0.870387               | -0.0520081 | 0.852534  | 0.953272  |
| Rbm6_j5          | 0.333846   | 0.217602               | -0.617486  | 0.304808  | 0.65013   |
| Rnf123_j5        | 0.0152788  | 0.892968               | 0          | 1         | 1         |
| Bsn_j2           | 12.7595    | 13.16                  | 0.0445929  | 0.629846  | 0.856211  |
| Dag1_j2          | 0.501447   | 0.294945               | 0          | 1         | 1         |
| Klhdc8b_j2       | 0.599708   | 1.72471                | 0          | 1         | 1         |
| Atrip_j6         | 0.0207325  | 0.114407               | 2.46421    | 0.0262866 | 1         |
| Atrip_j7         | 0.546809   | 0.423428               | -0.368921  | 0.293375  | 0.640286  |
| Atrip_j8         | 0.422366   | 0.728801               | 0.78703    | 0.010169  | 0.0865546 |
| Ccdc72_j1        | 13.7067    | 6.66325                | 0          | 1         | 1         |
| Dhx30            | 11.3457    | 10.2148                | 0          | 1         | 1         |
| Dhx30_j3         | 10.7183    | 9.56078                | 0          | 1         | 1         |
| Klhl18_j3        | 0          | 0.090686               | 0          | 1         | 1         |
| Mlh1_j2          | 0.207386   | 0.356179               | 0.780287   | 0.218445  | 0.56485   |
| Mlh1_j3          | 0.525291   | 1.11964                | 1.09185    | 0.0014986 | 0.0197253 |
| Fbxl2_j4         | 0          | 0.0787318              | 0          | 1         | 1         |
| AK077029_j1      | 0.0475789  | 0.239265               | 2.33021    | 0.0363529 | 0.210778  |
| Crtap_j2         | 0.0401285  | 0.186559               | 2.21693    | 0.0957716 | 0.382115  |

|                  |           |           |               |           |           |
|------------------|-----------|-----------|---------------|-----------|-----------|
| Gpd1l_j1         | 0.21911   | 0.211652  | 0             | 1         | 1         |
| Rbms3_j5         | 1.1306    | 1.12676   | 0             | 1         | 1         |
| Rbms3_j1         | 0.135125  | 0.198197  | 0             | 1         | 1         |
| XLOC_035100      | 11.8629   | 15.9116   | 0             | 1         | 1         |
| XLOC_035100      | 16.7149   | 14.2587   | 0             | 1         | 1         |
| 9330176C04Rik_j4 | 0.0175645 | 0.0926173 | 0             | 1         | 1         |
| Scn10a_j1        | 27.1422   | 21.565    | -0.331849     | 0.0001338 | 0.0027336 |
| Scn10a_j3        | 0         | 1.2983    | 1.79769e+308  | 2.30E-22  | 6.88E-20  |
| Scn11a_j2        | 0.60089   | 0.761491  | 0.341726      | 0.37878   | 0.710354  |
| Csrnp1_j2        | 0.641126  | 0.919161  | 0             | 1         | 1         |
| Csrnp1_j4        | 0         | 0.464135  | 0             | 1         | 1         |
| Ulk4_j10         | 0         | 0.19217   | 1.79769e+308  | 0.035486  | 0.207587  |
| Ulk4_j12         | 0         | 0.0630373 | 1.79769e+308  | 0.0591319 | 1         |
| Sec22c_j3        | 1.56892   | 2.02337   | 0             | 1         | 1         |
| Hhatl_j4         | 0         | 0.214238  | 1.79769e+308  | 0.0166415 | 0.1239    |
| XLOC_035130      | 0.0926691 | 0.257978  | 1.47709       | 0.0310628 | 0.190042  |
| XLOC_035131      | 0.370741  | 0.282101  | -0.394199     | 0.412121  | 0.731182  |
| Slc6a20a_j2      | 0         | 0.0479931 | 1.79769e+308  | 0.0951812 | 1         |
| Nudt11           | 10.096    | 10.2089   | 0.0160384     | 0.888224  | 0.964649  |
| Dgkk_j1          | 0.0909657 | 0         | -1.79769e+308 | 0.0001706 | 1         |
| LOC100270707_j1  | 0.0883424 | 0.0318218 | -1.47309      | 0.336963  | 1         |
| Syp              | 231.482   | 215.764   | -0.101444     | 0.247787  | 0.595123  |
| Prickle3         | 0.0207345 | 0.0506808 | 1.2894        | 0.318021  | 1         |
| Gpkow_j1         | 0.414163  | 0         | -1.79769e+308 | 1.30E-11  | 1.54E-09  |
| Praf2_j3         | 4.21142   | 4.10615   | -0.0365196    | 0.889619  | 0.964965  |
| Praf2_j5         | 0.109494  | 0.175067  | 0.677059      | 0.616851  | 0.849184  |
| Tcfe3_j2         | 10.3036   | 14.4616   | 0             | 1         | 1         |
| Tcfe3_j4         | 0.317569  | 0.292697  | 0             | 1         | 1         |
| Gripap1          | 17.467    | 16.6341   | 0             | 1         | 1         |
| Gripap1_j1       | 0.0538764 | 0         | 0             | 1         | 1         |
| Kcnd1_j6         | 6.57906   | 7.65574   | 0             | 1         | 1         |
| Kcnd1_j5         | 20.0158   | 20.0883   | 0             | 1         | 1         |
| Kcnd1_j3         | 9.29779   | 7.91167   | 0             | 1         | 1         |
| Kcnd1_j4         | 30.902    | 21.6326   | 0             | 1         | 1         |
| Otud5            | 3.12594   | 2.41678   | 0             | 1         | 1         |
| Pcsk1n           | 102.386   | 119.833   | 0.226998      | 0.0087478 | 0.0775463 |
| Pcsk1n_j2        | 245.861   | 308.623   | 0.328001      | 0.0002071 | 0.0039528 |
| B630019K06Rik    | 4.63313   | 2.50834   | 0             | 1         | 1         |
| Lancl3_j1        | 2.34234   | 1.28989   | -0.860702     | 6.96E-05  | 0.0015758 |
| Lancl3           | 1.03736   | 0.408749  | -1.34363      | 8.47E-07  | 3.58E-05  |
| Xk               | 2.29133   | 2.12645   | 0             | 1         | 1         |
| Tspan7           | 185.456   | 207.198   | 0.159928      | 0.0625245 | 0.295859  |
| Tspan7_j3        | 0.992375  | 0.280818  | -1.82125      | 0.0534268 | 0.269005  |
| Tspan7_j4        | 0.979509  | 0.32198   | -1.60509      | 0.0737915 | 0.327402  |
| Mid1ip1          | 23.762    | 19.9947   | 0             | 1         | 1         |
| Mid1ip1          | 77.2421   | 73.4906   | 0             | 1         | 1         |
| Atp6ap2          | 129.474   | 138.901   | 0.101391      | 0.236154  | 0.583368  |

|             |           |                 |            |           |           |
|-------------|-----------|-----------------|------------|-----------|-----------|
| Gm16265     | 9.88368   | 14.3495         | 0.537883   | 0.352804  | 0.689574  |
| AK036020_j3 | 0.0334752 | 0.0735136       | 1.13492    | 0.524302  | 1         |
| AK036020_j4 | 0.0476024 | 0 -1.79769e+308 |            | 0.0608389 | 1         |
| AK036020    | 0.0999019 | 0.219116        | 1.13311    | 0.218425  | 0.564838  |
| Usp9x_j3    | 1.06879   | 0.384858        | 0          | 1         | 1         |
| Usp9x_j8    | 1.90437   | 0.625501        | 0          | 1         | 1         |
| Usp9x_j7    | 0.148013  | 0.25151         | 0          | 1         | 1         |
| Usp9x_j11   | 0.145522  | 0.115279        | -0.336111  | 0.456857  | 0.760112  |
| Rpl3-ps1    | 260.69    | 262.121         | 0.00789969 | 0.926493  | 0.977218  |
| Ddx3x       | 55.0299   | 53.2721         | -0.0468375 | 0.587106  | 0.834863  |
| Maoa        | 13.3703   | 14.3878         | 0.105818   | 0.269239  | 0.618156  |
| Kdm6a_j7    | 1.05722   | 0.915548        | -0.207565  | 0.364383  | 0.698412  |
| Kdm6a_j1    | 0.283076  | 0.0928706       | -1.60789   | 0.0101656 | 0.086541  |
| Kdm6a_j5    | 1.27351   | 0.772969        | -0.72033   | 0.0023972 | 0.0288779 |
| Kdm6a_j8    | 0.192888  | 0.199868        | 0.0512834  | 0.924425  | 0.97636   |
| Chst7       | 0.265151  | 0.312497        | 0.237029   | 0.516731  | 0.795244  |
| Rp2h        | 2.08898   | 2.38237         | 0.1896     | 0.225304  | 0.57244   |
| Phf16_j1    | 0.411052  | 0 -1.79769e+308 |            | 1.98E-15  | 4.14E-13  |
| Phf16       | 0.352045  | 0.714971        | 1.02213    | 0.0003205 | 0.00565   |
| Phf16_j2    | 0.624331  | 0.832937        | 0.415896   | 0.165761  | 0.502417  |
| Uba1_j1     | 8.3895    | 26.3951         | 0          | 1         | 1         |
| Uba1        | 126.816   | 106.045         | 0          | 1         | 1         |
| Cdk16_j4    | 5.11648   | 5.57064         | 0          | 1         | 1         |
| Cdk16_j5    | 0.077828  | 0.25883         | 0          | 1         | 1         |
| Wdr44       | 1.35714   | 1.26938         | -0.0964447 | 0.691287  | 0.885697  |
| Wdr44       | 6.89516   | 6.06624         | -0.184782  | 0.11667   | 0.424713  |
| Dock11_j4   | 13.085    | 10.5268         | 0          | 1         | 1         |
| Dock11_j9   | 5.60002   | 5.50193         | 0          | 1         | 1         |
| Il13ra1     | 3.22639   | 6.36894         | 0.981131   | 3.57E-14  | 6.43E-12  |
| Zcchc12     | 2.08645   | 0.805587        | 0          | 1         | 1         |
| Zcchc12_j1  | 2.18926   | 3.16525         | 0          | 1         | 1         |
| Pgrmc1      | 25.1676   | 26.1989         | 0.0579388  | 0.549384  | 0.814722  |
| Slc25a43    | 0.756292  | 0.585397        | -0.369527  | 0.115927  | 0.423751  |
| Slc25a5_j1  | 25.4434   | 21.495          | -0.243292  | 0.048269  | 0.252722  |
| Slc25a5_j2  | 58.5663   | 48.8523         | -0.261645  | 0.0138666 | 0.108722  |
| Ube2a_j1    | 11.1994   | 8.1415          | -0.46005   | 1.26E-06  | 5.06E-05  |
| Nkap        | 2.5743    | 2.45828         | -0.0665332 | 0.669364  | 0.874814  |
| Zbtb33      | 2.724     | 2.34324         | 0          | 1         | 1         |
| Gm7598      | 0.0865272 | 0.0936683       | 0.114408   | 0.897944  | 1         |
| Mcts1_j2    | 21.0978   | 21.555          | 0          | 1         | 1         |
| Mcts1       | 15.7115   | 14.4081         | 0          | 1         | 1         |
| Gria3       | 0.642284  | 0.580951        | -0.144795  | 0.608992  | 0.84604   |
| Gria3_j9    | 0.258658  | 0.20726         | -0.319608  | 0.485136  | 0.776871  |
| Gria3_j12   | 1.34668   | 1.06897         | -0.333179  | 0.229363  | 0.576443  |
| Gria3_j14   | 2.14853   | 1.61444         | -0.412319  | 0.0747255 | 0.329828  |
| Xiap        | 2.99066   | 1.86545         | 0          | 1         | 1         |
| Xiap_j1     | 1.76616   | 1.75131         | 0          | 1         | 1         |



|                  |           |                 |            |           |           |
|------------------|-----------|-----------------|------------|-----------|-----------|
| Xiap_j2          | 1.25912   | 1.10845         | 0          | 1         | 1         |
| Xiap             | 0.314529  | 0.673342        | 0          | 1         | 1         |
| Stag2            | 5.6936    | 4.88763         | 0          | 1         | 1         |
| Stag2_j2         | 0.0911959 | 0.141495        | 0          | 1         | 1         |
| Stag2_j3         | 0.822947  | 0.475164        | 0          | 1         | 1         |
| 1110059M19Rik    | 0.937584  | 0.925197        | -0.0191876 | 0.948351  | 0.985052  |
| Ocrl             | 5.77961   | 6.24433         | 0.111574   | 0.344656  | 0.684282  |
| Ocrl_j1          | 1.87956   | 0.700624        | -1.42368   | 3.56E-08  | 2.18E-06  |
| Xpnpep2_j2       | 0.104432  | 0.0944369       | -0.145145  | 0.879739  | 1         |
| Xpnpep2_j3       | 0.0606247 | 0 -1.79769e+308 |            | 0.0358836 | 1         |
| Sash3_j1         | 0.172176  | 0.382554        | 1.15177    | 0.0249276 | 0.163927  |
| Sash3            | 0.074233  | 0.235737        | 1.66705    | 0.0319075 | 0.193578  |
| Utp14a           | 5.41636   | 5.74296         | 0.0844696  | 0.516631  | 0.795178  |
| Bcor1_j2         | 1.66303   | 2.04816         | 0.300516   | 0.0325138 | 0.195988  |
| Bcor1_j3         | 0.448332  | 0.358155        | -0.323982  | 0.253051  | 0.601097  |
| Bcor1_j5         | 0.0919775 | 0 -1.79769e+308 |            | 0.0002067 | 1         |
| XLOC_036248      | 0.107433  | 0.0753781       | -0.511219  | 0.628501  | 1         |
| Rab33a           | 6.11013   | 8.39288         | 0.457962   | 0.0009516 | 0.0137441 |
| Slc25a14_j3      | 0.929786  | 1.28711         | 0          | 1         | 1         |
| Slc25a14_j1      | 3.60323   | 3.18219         | 0          | 1         | 1         |
| Slc25a14_j5      | 3.09277   | 3.07745         | 0          | 1         | 1         |
| Rbmx2            | 3.10388   | 2.95578         | -0.070533  | 0.687715  | 0.883915  |
| Arhgap36_j1      | 3.54422   | 3.92346         | 0          | 1         | 1         |
| Arhgap36         | 8.95341   | 8.03324         | 0          | 1         | 1         |
| 2610018G03Rik    | 1.06167   | 0.892651        | -0.250168  | 0.196712  | 0.539473  |
| Ccdc160          | 2.21534   | 2.1295          | -0.0570122 | 0.796859  | 0.93252   |
| Phf6             | 1.77923   | 1.77533         | 0          | 1         | 1         |
| Phf6_j2          | 2.76545   | 2.88115         | 0          | 1         | 1         |
| Hprt_j1          | 2.72286   | 0 -1.79769e+308 |            | 8.77E-08  | 4.77E-06  |
| Hprt             | 115.842   | 124.407         | 0.102908   | 0.257912  | 0.606586  |
| Hprt_j2          | 26.0411   | 37.0331         | 0.508026   | 0.0008112 | 0.0121    |
| Gm14584          | 18.2235   | 17.3108         | -0.0741302 | 0.614202  | 0.847685  |
| Cxx1c            | 52.9859   | 52.5575         | 0          | 1         | 1         |
| 4930502E18Rik_j3 | 0.24782   | 0.324559        | 0.389187   | 0.528631  | 0.802182  |
| Zfp449           | 0.872656  | 0.806193        | -0.114288  | 0.66053   | 0.871208  |
| Zfp449_j2        | 0.797538  | 0.000412203     | -10.918    | 0.544415  | 0.811402  |
| Ncrna00086       | 4.30714   | 3.28055         | -0.392795  | 0.0099056 | 0.0851155 |
| Ddx26b_j4        | 0.0766243 | 0               | 0          | 1         | 1         |
| Ddx26b_j3        | 0.740832  | 0.801612        | 0          | 1         | 1         |
| Ddx26b_j8        | 0.110558  | 0               | 0          | 1         | 1         |
| Slc9a6_j1        | 24.6393   | 20.252          | 0          | 1         | 1         |
| Slc9a6_j2        | 0.0645317 | 0.0522347       | 0          | 1         | 1         |
| Fhl1_j1          | 0.290107  | 0.209353        | 0          | 1         | 1         |
| Fhl1             | 54.8332   | 49.9949         | 0          | 1         | 1         |
| Htatsf1          | 8.464     | 8.4035          | 0          | 1         | 1         |
| Htatsf1_j1       | 6.49578   | 6.52672         | 0          | 1         | 1         |
| F9               | 0.695868  | 0.316198        | -1.13799   | 0.0037559 | 0.0410103 |

|                  |           |                 |           |           |           |
|------------------|-----------|-----------------|-----------|-----------|-----------|
| Gm14662_j1       | 0.87855   | 1.36454         | 0.63522   | 0.118423  | 0.428442  |
| C230004F18Rik    | 1.91083   | 1.36794         | -0.482194 | 0.14004   | 0.465534  |
| C230004F18Rik_j9 | 0.474114  | 0.446442        | -0.086761 | 0.845783  | 0.951277  |
| C230004F18Rik_j1 | 0.67019   | 0.705389        | 0.0738495 | 0.711244  | 0.89506   |
| Slitrk2          | 0.238749  | 0.156962        | 0         | 1         | 1         |
| Slitrk2          | 0.54809   | 0.536103        | 0         | 1         | 1         |
| Slitrk2_j3       | 0.182072  | 0.0934815       | 0         | 1         | 1         |
| Fmr1_j4          | 0.46971   | 0.0454814       | 0         | 1         | 1         |
| Fmr1_j3          | 3.97911   | 3.10726         | 0         | 1         | 1         |
| Fmr1_j5          | 0.13477   | 0               | 0         | 1         | 1         |
| Aff2             | 0.459444  | 0.283207        | -0.698035 | 0.0223986 | 0.152567  |
| 1110012L19Rik    | 10.316    | 10.9394         | 0.0846423 | 0.54175   | 0.809754  |
| Mamld1_j3        | 0.795856  | 0.518827        | -0.617255 | 0.0911036 | 0.371031  |
| Mamld1_j2        | 2.86174   | 2.66668         | -0.101843 | 0.497182  | 0.783722  |
| Mtm1             | 1.91031   | 1.65538         | -0.206642 | 0.286117  | 0.634849  |
| Mtmr1_j2         | 0.783886  | 0.300928        | 0         | 1         | 1         |
| Mtmr1_j4         | 0.966097  | 0.926916        | 0         | 1         | 1         |
| Hmgb3_j1         | 0.0693007 | 0 -1.79769e+308 | 0.0268176 |           | 1         |
| Hmgb3_j3         | 1.38003   | 0.68432         | -1.01195  | 0.0168577 | 0.125032  |
| Hmgb3_j4         | 0.108562  | 0.429443        | 1.98395   | 0.0211951 | 0.146549  |
| Vma21            | 2.42163   | 1.54398         | 0         | 1         | 1         |
| Prrg3_j1         | 0.357063  | 0               | 0         | 1         | 1         |
| Prrg3            | 1.91664   | 1.39137         | 0         | 1         | 1         |
| Nsdhl            | 26.2747   | 26.9471         | 0         | 1         | 1         |
| Xlr4b_j1         | 0.391548  | 0.104309        | -1.90833  | 0.0687035 | 0.314116  |
| Zfp275_j2        | 1.57898   | 1.57237         | 0         | 1         | 1         |
| Zfp275_j1        | 1.59207   | 1.287           | 0         | 1         | 1         |
| Zfp275           | 1.9375    | 1.69815         | 0         | 1         | 1         |
| Bgn              | 11.8597   | 14.576          | 0.297523  | 0.0056193 | 0.0555198 |
| Atp2b3_j2        | 1.8741    | 0.942043        | -0.99233  | 1.21E-05  | 0.0003656 |
| Atp2b3_j4        | 3.82901   | 2.67839         | -0.515608 | 0.0001286 | 0.0026504 |
| Atp2b3_j8        | 0.115704  | 0 -1.79769e+308 | 0.0002953 |           | 1         |
| Slc6a8           | 7.59278   | 7.95047         | 0.0664116 | 0.50186   | 0.785858  |
| Abcd1            | 0.704401  | 0.39766         | -0.824862 | 0.0485972 | 0.253924  |
| Abcd1            | 1.99285   | 2.45822         | 0.302778  | 0.0866561 | 0.359804  |
| Abcd1_j2         | 1.67492   | 1.54229         | -0.119019 | 0.629191  | 0.855844  |
| Abcd1_j3         | 1.5366    | 1.86401         | 0.278666  | 0.362463  | 0.696764  |
| Opn1mw_j1        | 0.162566  | 0.151065        | 0         | 1         | 1         |
| Emd              | 19.2184   | 20.8858         | 0.120032  | 0.275381  | 0.624461  |
| Atp6ap1          | 150.626   | 181.691         | 0         | 1         | 1         |
| Gdi1             | 85.724    | 78.2588         | 0         | 1         | 1         |
| Gdi1_j4          | 7.69886   | 11.9524         | 0         | 1         | 1         |
| Fam50a           | 10.6054   | 12.2547         | 0.208543  | 0.110556  | 0.413801  |
| Fam50a_j1        | 7.17947   | 5.86057         | -0.292837 | 0.223929  | 0.571105  |
| Plxna3           | 0.925197  | 1.16711         | 0         | 1         | 1         |
| Plxna3_j9        | 2.50386   | 3.49428         | 0         | 1         | 1         |
| Ikbkg_j3         | 0.17744   | 0.147679        | 0         | 1         | 1         |

|               |           |                 |             |           |           |
|---------------|-----------|-----------------|-------------|-----------|-----------|
| Xlr3d-ps_j1   | 0.498956  | 0.49517         | -0.0109886  | 0.98403   | 0.995326  |
| Xlr3e-ps_j1   | 1.248     | 0.844497        | -0.563452   | 0.196555  | 0.539312  |
| Xlr3d-ps_j2   | 0.291497  | 0.118422        | -1.29954    | 0.130292  | 0.449403  |
| Xlr4e-ps_j2   | 0.288957  | 0.402792        | 0.479184    | 0.464643  | 0.764867  |
| Xlr4e-ps_j4   | 0.127733  | 0 -1.79769e+308 |             | 0.0124455 | 1         |
| Xlr4e-ps_j5   | 0.39555   | 0 -1.79769e+308 |             | 0.0023271 | 0.0281309 |
| Dkc1          | 0.59319   | 0.602922        | 0.0234786   | 0.907819  | 0.970964  |
| Gm6039        | 3.61211   | 4.2423          | 0.232004    | 0.189687  | 0.531588  |
| Fundc2        | 5.22999   | 4.26746         | -0.29343    | 0.0158392 | 0.119411  |
| Vbp1          | 62.2237   | 59.1037         | -0.0742145  | 0.415549  | 0.733384  |
| Rps24-ps3     | 200.571   | 235.336         | 0.230612    | 0.010348  | 0.0877108 |
| Tmem47        | 27.7825   | 16.0105         | -0.795153   | 0         | 0         |
| Dmd_j8        | 2.13995   | 1.87714         | 0           | 1         | 1         |
| Tab3          | 0.389953  | 0.1664          | 0           | 1         | 1         |
| Tab3_j2       | 0.559616  | 0.477855        | 0           | 1         | 1         |
| Tab3_j1       | 0.454547  | 0.000465906     | 0           | 1         | 1         |
| 5430427O19Rik | 0.188469  | 0.266847        | 0.501687    | 0.28383   | 0.632234  |
| Pcyt1b        | 9.68304   | 6.18316         | 0           | 1         | 1         |
| Pcyt1b_j1     | 4.66336   | 3.44613         | 0           | 1         | 1         |
| Klhl15_j3     | 0.659022  | 0.325049        | -1.01967    | 0.0017236 | 0.0221971 |
| Klhl15        | 0.243498  | 0.359645        | 0.562662    | 0.116478  | 0.424494  |
| Apoo_j2       | 0.462607  | 0 -1.79769e+308 |             | 0.004467  | 0.0466902 |
| Gm14827_j5    | 0.0860642 | 0.0209475       | -2.03864    | 0.0645904 | 1         |
| Gm14827_j4    | 0.143731  | 0.116073        | -0.308342   | 0.526158  | 0.800979  |
| Gm14827_j8    | 0.616466  | 0.086092        | -2.84007    | 0.0008102 | 0.0120915 |
| Zxdb          | 2.0738    | 1.74788         | -0.246675   | 0.117062  | 0.425436  |
| Msn           | 37.5086   | 44.2552         | 0           | 1         | 1         |
| Gpr165        | 0.178517  | 0.281998        | 0.659622    | 0.104594  | 0.401321  |
| Ar            | 1.05269   | 0.675218        | -0.640655   | 0.001248  | 0.0170681 |
| Yipf6_j1      | 8.19678   | 7.5304          | 0           | 1         | 1         |
| Yipf6         | 3.55147   | 3.97074         | 0           | 1         | 1         |
| Stard8_j1     | 1.37199   | 1.45403         | 0           | 1         | 1         |
| Efnb1         | 6.5838    | 6.40642         | -0.039402   | 0.740693  | 0.909129  |
| XLOC_036367   | 0.145691  | 0.0991217       | -0.555636   | 0.550908  | 0.815617  |
| Gm14808       | 0.20798   | 0.269405        | 0.373331    | 0.535286  | 0.806155  |
| Tmem28        | 5.32775   | 5.33092         | 0.000858961 | 0.99422   | 0.998359  |
| Igfbp1        | 17.7267   | 17.9195         | 0.0156086   | 0.885863  | 0.963769  |
| Gdpc2         | 0.187496  | 0.125209        | -0.582522   | 0.470161  | 0.768035  |
| Gdpc2         | 0.176094  | 0 -1.79769e+308 |             | 0.0006828 | 0.0105092 |
| Dlg3_j2       | 0.374427  | 0.00638815      | 0           | 1         | 1         |
| Dlg3          | 0.520324  | 0.530343        | 0           | 1         | 1         |
| Dlg3_j5       | 0.63235   | 0.519386        | 0           | 1         | 1         |
| Foxo4         | 2.56834   | 2.80038         | 0.124784    | 0.445782  | 0.753182  |
| Med12_j3      | 1.22131   | 1.10498         | 0           | 1         | 1         |
| Med12_j8      | 2.86282   | 2.91077         | 0           | 1         | 1         |
| Med12_j9      | 0.104324  | 0.00133118      | 0           | 1         | 1         |
| Nlgn3_j1      | 3.32345   | 2.40057         | 0           | 1         | 1         |

|                  |           |             |            |           |           |
|------------------|-----------|-------------|------------|-----------|-----------|
| Nlgn3_j3         | 1.2152    | 1.13488     | 0          | 1         | 1         |
| Nlgn3_j2         | 0.999602  | 0.502326    | 0          | 1         | 1         |
| Nlgn3            | 3.21818   | 3.25909     | 0          | 1         | 1         |
| Gjb1_j1          | 0.975188  | 1.08426     | 0.152961   | 0.570916  | 0.826488  |
| Taf1_j3          | 0.66276   | 0.499779    | 0          | 1         | 1         |
| Taf1_j1          | 2.55254   | 3.77069     | 0          | 1         | 1         |
| Ogt_j2           | 0.675917  | 1.13359     | 0.745986   | 0.0036662 | 0.0403837 |
| Ogt_j4           | 11.0146   | 7.57671     | -0.539777  | 1.49E-06  | 5.86E-05  |
| Ogt_j9           | 4.11563   | 3.82726     | -0.104801  | 0.434682  | 0.745756  |
| Pin4_j2          | 0.235033  | 0.350627    | 0.577072   | 0.601023  | 0.841992  |
| Chic1            | 1.929     | 1.53067     | -0.333686  | 0.0187932 | 0.13515   |
| Uprt             | 3.13221   | 3.60336     | 0.202161   | 0.0987396 | 0.388529  |
| 2610029G23Rik_j3 | 5.73084   | 7.28139     | 0.345468   | 0.0545227 | 0.272385  |
| Magee1           | 61.4588   | 55.4872     | -0.147463  | 0.0863224 | 0.359     |
| Cox7b_j2         | 42.3648   | 39.0664     | -0.116936  | 0.2572    | 0.605991  |
| Cox7b_j3         | 0.440463  | 0.274697    | -0.681181  | 0.697637  | 0.888632  |
| Atp7a            | 0.44795   | 0.294073    | -0.607164  | 0.0511693 | 0.262108  |
| Pgk1_j2          | 25.3356   | 22.9334     | 0          | 1         | 1         |
| Lpar4            | 0.316096  | 0.13121     | -1.26849   | 0.0243964 | 0.161546  |
| 2810403D21Rik_j4 | 0.14604   | 0.0656201   | -1.15415   | 0.434045  | 0.745221  |
| Sh3bgrl          | 13.0877   | 13.1112     | 0          | 1         | 1         |
| Sh3bgrl_j3       | 0.234425  | 0           | 0          | 1         | 1         |
| Apool            | 5.35458   | 8.2045      | 0.615641   | 5.59E-05  | 0.0013124 |
| Zfp711_j3        | 0.0728522 | 0.11287     | 0.631622   | 0.411545  | 1         |
| Klhl4            | 0.236865  | 0.140764    | -0.750785  | 0.168888  | 0.505733  |
| Klhl4            | 0.11442   | 0.000270758 | -8.72312   | 0.725337  | 1         |
| Gm14897          | 4.96192   | 6.3455      | 0.354835   | 0.389136  | 0.716393  |
| Gm16373          | 8.69354   | 8.83544     | 0.0233583  | 0.916287  | 0.973929  |
| Pcdh11x_j5       | 0.528671  | 0.0555793   | -3.24975   | 9.25E-06  | 0.0002902 |
| Pcdh11x_j4       | 0.391503  | 0.532275    | 0.443149   | 0.100142  | 0.3917    |
| Gm16421          | 1.16686   | 1.33787     | 0.197311   | 0.421482  | 0.737684  |
| Gm14942          | 1.93141   | 1.44434     | -0.419247  | 0.370862  | 0.703864  |
| Diap2_j1         | 0.135455  | 0.209333    | 0.627984   | 0.124154  | 0.439098  |
| Diap2            | 0.11702   | 4.61E-05    | -11.3091   | 0.848072  | 1         |
| Srpx2            | 0.39095   | 0.246175    | -0.667303  | 0.138878  | 0.463447  |
| Cstf2_j3         | 2.47952   | 2.16297     | 0          | 1         | 1         |
| Cstf2_j2         | 1.70448   | 1.82304     | 0          | 1         | 1         |
| Cstf2_j1         | 4.49921   | 3.31178     | 0          | 1         | 1         |
| Cstf2_j4         | 0.833602  | 1.61536     | 0          | 1         | 1         |
| Tmem35           | 16.318    | 10.3974     | 0          | 1         | 1         |
| Drp2             | 1.4191    | 1.38829     | 0          | 1         | 1         |
| Drp2_j5          | 0         | 0.107063    | 0          | 1         | 1         |
| Drp2_j6          | 2.61869   | 3.07477     | 0          | 1         | 1         |
| Rpl36a_j1        | 0.0947092 | 0.108234    | 0.192579   | 0.794707  | 1         |
| Hnrnph2          | 26.9741   | 25.9612     | -0.0552195 | 0.550576  | 0.815397  |
| Armcx1           | 29.7191   | 25.8769     | 0          | 1         | 1         |
| Armcx1_j2        | 23.1077   | 27.5332     | 0          | 1         | 1         |

|             |            |                 |            |           |           |
|-------------|------------|-----------------|------------|-----------|-----------|
| Armcx1      | 9.21625    | 8.2006          | 0          | 1         | 1         |
| Gprasp1_j3  | 2.07611    | 1.01188         | -1.03684   | 1.36E-06  | 5.41E-05  |
| Gprasp1_j2  | 1.06772    | 0.74134         | -0.52633   | 0.0364672 | 0.211122  |
| Wbp5        | 44.5845    | 46.3995         | 0          | 1         | 1         |
| Tceal3      | 27.7835    | 25.843          | -0.104453  | 0.357021  | 0.69299   |
| Tceal1      | 23.7318    | 19.0713         | -0.31542   | 0.0111761 | 0.0931224 |
| Plp1_j5     | 0.61198    | 0.250708        | 0          | 1         | 1         |
| Zcchc18_j1  | 0.0106361  | 0.0510497       | 0          | 1         | 1         |
| Fam199x_j1  | 1.71256    | 1.58975         | 0          | 1         | 1         |
| Fam199x     | 0.585666   | 0.559911        | 0          | 1         | 1         |
| XLOC_036446 | 0.182552   | 0.0439334       | -2.05492   | 0.107948  | 0.408438  |
| Rnf128      | 4.0438     | 3.43089         | -0.237131  | 0.113401  | 0.419139  |
| Tbc1d8b_j1  | 0.160816   | 0 -1.79769e+308 |            | 1.49E-07  | 7.62E-06  |
| Tbc1d8b     | 0.411399   | 0.365716        | -0.169814  | 0.577915  | 0.830091  |
| Frmpd3_j1   | 0.238256   | 0.0659328       | 0          | 1         | 1         |
| Frmpd3_j6   | 0.567296   | 0.111677        | 0          | 1         | 1         |
| Frmpd3_j5   | 0.156839   | 0.250067        | 0          | 1         | 1         |
| Prps1_j2    | 3.53782    | 1.35744         | -1.38197   | 6.36E-05  | 0.0014661 |
| Mid2_j2     | 0.00010367 | 0.0743382       | 0          | 1         | 1         |
| Mid2_j7     | 3.45317    | 3.3004          | 0          | 1         | 1         |
| Atg4a_j1    | 0.38463    | 0.412163        | 0.0997411  | 0.850974  | 0.952632  |
| Col4a5_j10  | 0.2147     | 0 -1.79769e+308 |            | 8.33E-07  | 3.53E-05  |
| Nxt2_j1     | 4.69635    | 0.854432        | 0          | 1         | 1         |
| Nxt2        | 5.64108    | 3.67301         | 0          | 1         | 1         |
| Tmem164     | 0.892456   | 1.0512          | 0          | 1         | 1         |
| Tmem164_j2  | 0.321823   | 0               | 0          | 1         | 1         |
| Pak3_j2     | 0.654098   | 0.54595         | 0          | 1         | 1         |
| Pak3_j5     | 1.48135    | 1.43994         | 0          | 1         | 1         |
| Pak3_j9     | 3.76944    | 3.58699         | 0          | 1         | 1         |
| Alg13       | 0.769089   | 0.808598        | 0.0722713  | 0.78102   | 0.926007  |
| Alg13_j2    | 0.107672   | 0 -1.79769e+308 |            | 0.0004869 | 1         |
| Alg13_j1    | 1.24711    | 1.0419          | -0.25937   | 0.213311  | 0.558509  |
| Alas2_j4    | 0.0626634  | 0 -1.79769e+308 |            | 0.0137765 | 1         |
| Alas2_j3    | 0.076554   | 0.0524034       | -0.546817  | 0.617822  | 1         |
| Pfkfb1_j1   | 0.40298    | 0.471965        | 0.227972   | 0.58715   | 0.834901  |
| Pfkfb1      | 0.0980321  | 0.122633        | 0.323019   | 0.75542   | 1         |
| Pfkfb1_j7   | 0.292244   | 0.0267722       | -3.44837   | 0.153304  | 0.485625  |
| Fgd1        | 0.698788   | 0.592628        | 0          | 1         | 1         |
| Wnk3-ps_j1  | 0.191131   | 0.125254        | -0.609707  | 0.290775  | 0.638107  |
| XLOC_036473 | 0.258045   | 0.182387        | -0.500622  | 0.452827  | 0.757789  |
| Wnk3_j4     | 0.139051   | 0.0992005       | -0.487194  | 0.389047  | 0.716324  |
| Fam120c     | 1.82133    | 1.5335          | 0          | 1         | 1         |
| Phf8_j2     | 1.18421    | 1.11599         | -0.0856057 | 0.680766  | 0.879921  |
| Phf8        | 0.525011   | 0.852717        | 0.699717   | 0.0071852 | 0.0672033 |
| Huwe1_j3    | 0.083611   | 0.0131492       | 0          | 1         | 1         |
| Huwe1_j13   | 6.68495    | 6.64882         | 0          | 1         | 1         |
| Hsd17b10    | 25.6168    | 22.5953         | -0.181064  | 0.109607  | 0.412055  |

|                  |           |           |              |           |          |
|------------------|-----------|-----------|--------------|-----------|----------|
| Smc1a            | 10.6141   | 10.091    | 0            | 1         | 1        |
| Smc1a_j2         | 0.255169  | 0         | 0            | 1         | 1        |
| lqsec2_j3        | 1.44491   | 1.52593   | 0            | 1         | 1        |
| lqsec2_j4        | 0.940373  | 1.13977   | 0            | 1         | 1        |
| lqsec2           | 18.3914   | 15.0485   | 0            | 1         | 1        |
| Kdm5c_j2         | 0.0510085 | 0.161223  | 0            | 1         | 1        |
| Kdm5c            | 3.6309    | 4.25886   | 0            | 1         | 1        |
| Rragb_j1         | 5.28497   | 3.7396    | 0            | 1         | 1        |
| Rragb            | 4.49197   | 3.9431    | 0            | 1         | 1        |
| Klf8             | 0.342125  | 0.0991711 | 0            | 1         | 1        |
| Klf8             | 0.563641  | 0.197783  | 0            | 1         | 1        |
| Klf8_j7          | 0.477959  | 0.0882475 | 0            | 1         | 1        |
| Ubqln2           | 39.3499   | 41.0561   | 0.0612338    | 0.479464  | 0.77361  |
| 2210013021Rik    | 37.234    | 37.5804   | 0.0133574    | 0.904042  | 0.969371 |
| Spin2            | 0.230844  | 0.269098  | 0.221214     | 0.737478  | 0.907523 |
| Spin2_j1         | 0.254687  | 0.061586  | -2.04805     | 0.0955122 | 0.381511 |
| Acot9            | 2.26948   | 1.92082   | -0.240641    | 0.381919  | 0.712127 |
| Smpx_j1          | 0.447736  | 0.280845  | -0.672874    | 0.380578  | 0.711466 |
| Smpx             | 0.96658   | 0.456195  | -1.08324     | 0.0238133 | 0.15885  |
| Smpx_j5          | 2.85963   | 1.60689   | -0.831555    | 0.0173347 | 0.127487 |
| Rps6ka3_j4       | 8.49555   | 6.38356   | 0            | 1         | 1        |
| Rps6ka3          | 6.45378   | 5.0121    | 0            | 1         | 1        |
| Rps6ka3_j5       | 0.234551  | 0.317239  | 0            | 1         | 1        |
| Eif1ax           | 35.7663   | 33.0388   | -0.114441    | 0.184264  | 0.524798 |
| Mtap7d2_j1       | 51.0796   | 34.1714   | 0            | 1         | 1        |
| Mtap7d2_j9       | 11.8817   | 10.4252   | 0            | 1         | 1        |
| A830080D01Rik_j1 | 0.399661  | 0.313934  | 0            | 1         | 1        |
| A830080D01Rik_j2 | 0.531017  | 0.591341  | 0            | 1         | 1        |
| A830080D01Rik    | 0.698064  | 0.902999  | 0            | 1         | 1        |
| Sh3kbp1_j3       | 0.740072  | 0.699621  | 0            | 1         | 1        |
| Sh3kbp1_j4       | 0.371142  | 0.279705  | 0            | 1         | 1        |
| Sh3kbp1_j11      | 1.0604    | 1.67388   | 0            | 1         | 1        |
| Gpr64            | 1.14571   | 0.372432  | 0            | 1         | 1        |
| Scml2_j2         | 0.201144  | 0.013985  | -3.84627     | 0.160849  | 0.495481 |
| Rai2             | 1.23099   | 1.58137   | 0.361346     | 0.16913   | 0.505835 |
| Rai2             | 3.36723   | 2.95492   | -0.188441    | 0.299826  | 0.646412 |
| Rbbp7_j1         | 1.25657   | 0.893455  | 0            | 1         | 1        |
| Ace2_j2          | 0.0511275 | 0.0287192 | -0.832084    | 0.542404  | 1        |
| Ace2             | 0.333507  | 0.401475  | 0.267592     | 0.42219   | 0.738253 |
| Pir_j1           | 2.15515   | 1.43627   | -0.585468    | 0.0093479 | 0.081531 |
| Pir_j3           | 1.11899   | 0.930027  | -0.266852    | 0.298937  | 0.645753 |
| Pir_j2           | 0         | 0.538797  | 1.79769e+308 | 1.87E-07  | 9.29E-06 |
| Piga_j1          | 0.233979  | 0.44847   | 0.938628     | 0.0536996 | 0.269989 |
| Fancb            | 0.566136  | 0.366647  | -0.626757    | 0.0939286 | 0.377641 |
| Fancb_j6         | 0.108181  | 0.178925  | 0.725914     | 0.483659  | 0.776062 |
| Gemin8           | 0.409878  | 0.0922647 | -2.15134     | 0.0370282 | 0.213053 |
| Gpm6b            | 19.1358   | 17.3231   | 0            | 1         | 1        |

|              |           |                 |           |           |           |
|--------------|-----------|-----------------|-----------|-----------|-----------|
| Trappc2_j1   | 0.0837712 | 0.0175582       | 0         | 1         | 1         |
| Trappc2_j3   | 0.679133  | 0.486568        | 0         | 1         | 1         |
| Arhgap6      | 0.66126   | 0.550725        | -0.263887 | 0.286324  | 0.635145  |
| Mid1_j3      | 0.0887548 | 0.328552        | 1.88823   | 0.0012004 | 0.0165515 |
| Mid1_j4      | 0.103064  | 0 -1.79769e+308 |           | 0.0012414 | 1         |
| Mid1_j8      | 1.26239   | 0.594093        | -1.08739  | 0.0038204 | 0.0415417 |
| Nudt10       | 9.03538   | 8.40669         | -0.104047 | 0.439105  | 0.748789  |
| Bmp15        | 1.35395   | 0.979234        | -0.467451 | 0.0268863 | 0.172774  |
| Clcn5_j1     | 4.12797   | 4.89994         | 0         | 1         | 1         |
| Clcn5        | 2.73456   | 2.21374         | 0         | 1         | 1         |
| Usp27x       | 0.6045    | 0.650991        | 0.106895  | 0.63847   | 0.860159  |
| cip7         | 0.391695  | 0.428653        | 0.13008   | 0.860653  | 0.955865  |
| cip7         | 0.568183  | 0.664404        | 0.225705  | 0.75147   | 0.913952  |
| Ppp1r3f      | 5.63017   | 4.82433         | -0.222849 | 0.103791  | 0.399591  |
| Ccdc22_j2    | 1.68839   | 1.47015         | -0.199682 | 0.394042  | 0.719796  |
| Ccdc22_j7    | 3.72569   | 4.11197         | 0.142322  | 0.412129  | 0.731182  |
| Ccdc120_j4   | 1.84383   | 1.54249         | -0.25744  | 0.188574  | 0.530176  |
| Pqbp1        | 10.9752   | 12.0141         | 0.130481  | 0.194639  | 0.536974  |
| Pqbp1        | 0.798589  | 0.861389        | 0.109213  | 0.590177  | 0.836402  |
| Hdac6_j4     | 0         | 0.0583247       | 0         | 1         | 1         |
| Suv39h1      | 4.61129   | 4.82478         | 0.0652922 | 0.648937  | 0.864926  |
| Suv39h1      | 1.29994   | 1.34528         | 0.0494548 | 0.848923  | 0.952186  |
| Wdr13_j3     | 7.79207   | 7.09799         | 0         | 1         | 1         |
| Wdr13        | 3.46566   | 2.12867         | 0         | 1         | 1         |
| Tbc1d25      | 2.5069    | 1.91081         | 0         | 1         | 1         |
| Ebp_j1       | 19.6146   | 24.5167         | 0.32184   | 0.0099828 | 0.0855226 |
| Ebp          | 5.94586   | 7.25234         | 0.286562  | 0.0966117 | 0.383933  |
| Porcn        | 14.001    | 12.6806         | -0.142909 | 0.215795  | 0.561549  |
| Ftsj1        | 3.35094   | 3.88091         | 0         | 1         | 1         |
| Ftsj1        | 0.277955  | 0.618171        | 0         | 1         | 1         |
| Cybb         | 0.510517  | 0.561424        | 0         | 1         | 1         |
| Dynlt3       | 182.776   | 164.533         | -0.151694 | 0.0771538 | 0.336101  |
| Rpgr_j1      | 0.462599  | 0.384796        | -0.265668 | 0.42915   | 0.742566  |
| Srpx         | 1.71288   | 1.85085         | 0.111763  | 0.61006   | 0.846292  |
| Rpgr         | 0.672729  | 0.983268        | 0.547559  | 0.0707211 | 0.319662  |
| Bcor         | 0.760515  | 0.686515        | 0         | 1         | 1         |
| Bcor_j1      | 0.751486  | 0.548273        | 0         | 1         | 1         |
| Bcor_j2      | 0.37091   | 0.164162        | 0         | 1         | 1         |
| mKIAA1575_j5 | 0.0460841 | 0.143961        | 0         | 1         | 1         |
| mKIAA1575_j7 | 2.3203    | 1.8077          | 0         | 1         | 1         |
| Med14_j3     | 1.25953   | 0.928735        | -0.43955  | 0.0118461 | 0.0972456 |
| Med14_j6     | 0.581384  | 0.402851        | -0.529245 | 0.142248  | 0.468886  |
| Gm14535      | 17.1436   | 20.23           | 0.238831  | 0.0701276 | 0.317943  |
| Gm9434       | 9.43494   | 8.19993         | -0.202401 | 0.254348  | 0.602682  |
| Cask_j8      | 3.89874   | 4.45193         | 0         | 1         | 1         |
| Cask_j7      | 0.373052  | 0.00170467      | 0         | 1         | 1         |
| Maob_j1      | 0.0598035 | 0.0995143       | 0.734674  | 0.518404  | 1         |

|            |           |                 |              |           |           |
|------------|-----------|-----------------|--------------|-----------|-----------|
| Maob       | 1.27719   | 1.24909         | -0.0320978   | 0.884894  | 0.963475  |
| Ndp        | 4.85871   | 3.85305         | 0            | 1         | 1         |
| Ndp_j2     | 2.49952   | 4.3429          | 0            | 1         | 1         |
| Efhc2      | 0.800163  | 0.153992        | -2.37744     | 0.0001389 | 0.0028164 |
| Fundc1     | 28.8486   | 24.9478         | -0.20959     | 0.0260401 | 0.169188  |
| Slc9a7     | 0.209714  | 0.0880101       | -1.25269     | 0.0096388 | 0.0834111 |
| Slc9a7_j4  | 5.14961   | 4.3621          | -0.23944     | 0.0478741 | 0.251548  |
| Ndufb11_j2 | 1.16613   | 1.04841         | -0.153522    | 0.660257  | 0.871049  |
| Ndufb11    | 0.141736  | 0.125015        | -0.181106    | 0.84911   | 0.952225  |
| Syn1_j1    | 0.616519  | 0.41405         | 0            | 1         | 1         |
| Zfp182_j6  | 0.321387  | 0.278896        | 0            | 1         | 1         |
| Zfp182_j7  | 0.224969  | 0               | 0            | 1         | 1         |
| Zfp182_j4  | 0.239348  | 0.037574        | 0            | 1         | 1         |
| Zfp182_j2  | 0.54449   | 0.358184        | 0            | 1         | 1         |
| Zfp300_j1  | 0.444245  | 0.372127        | -0.255562    | 0.309906  | 0.654449  |
| Gm6938     | 0.334376  | 0.155096        | -1.10831     | 0.0451492 | 0.243117  |
| Klhl13     | 1.34486   | 1.32386         | 0            | 1         | 1         |
| Klhl13_j6  | 0.640647  | 0.770858        | 0            | 1         | 1         |
| Klhl13_j7  | 1.71178   | 1.37066         | 0            | 1         | 1         |
| Klhl13     | 1.8594    | 1.40815         | 0            | 1         | 1         |
| Gm6023     | 3.3602    | 3.45782         | 0.0413122    | 0.869387  | 0.958432  |
| Akap17b_j4 | 2.8178    | 2.74797         | 0            | 1         | 1         |
| Akap17b    | 1.36704   | 1.0825          | 0            | 1         | 1         |
| Rpl39_j1   | 0.0595722 | 0 -1.79769e+308 |              | 0.201854  | 1         |
| Nkrf       | 0.622895  | 0.535463        | -0.218202    | 0.265889  | 0.614926  |
| Sept6_j5   | 0.482367  | 0.447511        | -0.108208    | 0.833298  | 0.946329  |
| Sept6_j6   | 0.154933  | 0.119142        | -0.37896     | 0.538195  | 0.807862  |
| Sept6_j8   | 0.349983  | 0.293519        | -0.253832    | 0.746245  | 0.911606  |
| Upf3b_j2   | 5.29501   | 6.24927         | 0.239055     | 0.257186  | 0.605988  |
| Upf3b      | 4.06543   | 4.16977         | 0.0365588    | 0.811395  | 0.938053  |
| Ndufa1     | 26.7707   | 26.7612         | -0.000510959 | 0.995965  | 0.998876  |
| Fam70a     | 13.0982   | 8.93222         | 0            | 1         | 1         |
| Fam70a     | 53.8645   | 34.9471         | 0            | 1         | 1         |
| Lamp2      | 60.9064   | 53.8634         | -0.17729     | 0.0406179 | 0.226125  |
| Lamp2      | 63.0801   | 63.027          | -0.00121389  | 0.989442  | 0.996683  |
| Cul4b_j1   | 5.30902   | 3.5585          | 0            | 1         | 1         |
| C1galt1c1  | 13.8768   | 14.8914         | 0.101802     | 0.422718  | 0.738516  |
| Thoc2      | 1.43655   | 1.19337         | -0.267562    | 0.125552  | 0.441417  |
| Odz1_j1    | 0.900573  | 0.533007        | 0            | 1         | 1         |
| Odz1_j6    | 0.0570635 | 0.118368        | 1.05264      | 1         | 1         |
| ten-m1     | 0.182114  | 0.0323288       | 0            | 1         | 1         |
| Dcaf12l1   | 1.25166   | 0.952733        | -0.3937      | 0.134887  | 0.457099  |
| Dcaf12l1   | 3.95283   | 4.28427         | 0.116161     | 0.396032  | 0.720998  |
| Smarca1_j5 | 3.05963   | 2.28827         | 0            | 1         | 1         |
| Smarca1_j6 | 0.471459  | 0.440826        | 0            | 1         | 1         |
| Apln_j1    | 0.346245  | 0.270787        | -0.354634    | 0.418113  | 0.735013  |
| Zdhhc9     | 21.2943   | 20.1414         | 0            | 1         | 1         |



|                  |           |                 |            |           |           |
|------------------|-----------|-----------------|------------|-----------|-----------|
| Aifm1_j4         | 6.72308   | 6.61105         | 0          | 1         | 1         |
| Aifm1            | 5.74087   | 5.31349         | 0          | 1         | 1         |
| Zfp280c_j2       | 1.67165   | 1.44682         | -0.208384  | 0.430011  | 0.743005  |
| Zfp280c_j5       | 0.176269  | 0 -1.79769e+308 |            | 1.96E-05  | 0.0005461 |
| Zfp280c_j6       | 0.28672   | 0 -1.79769e+308 |            | 8.33E-08  | 4.56E-06  |
| Zfp280c          | 0.621925  | 0.494057        | -0.332063  | 0.326838  | 0.669911  |
| Gpr119_j1        | 0.170347  | 0.396721        | 1.21965    | 0.0298943 | 0.18531   |
| Gpr119           | 0.21869   | 0.517604        | 1.24296    | 0.0074418 | 0.0689936 |
| Enox2_j1         | 0.317131  | 0.221587        | 0          | 1         | 1         |
| Enox2            | 2.64718   | 1.67077         | 0          | 1         | 1         |
| AK039412_j1      | 0.463294  | 0.189553        | -1.28933   | 0.0122108 | 0.0994683 |
| 6720401G13Rik_j1 | 1.5253    | 1.38937         | 0          | 1         | 1         |
| Frmd7_j3         | 0.142171  | 0.0744227       | -0.933815  | 0.204634  | 0.548825  |
| Frmd7            | 0.260678  | 0.136046        | -0.938176  | 0.0379202 | 0.216194  |
| Rap2c            | 16.4962   | 14.6191         | -0.174282  | 0.086796  | 0.360114  |
| Hs6st2           | 1.37895   | 0.913117        | 0          | 1         | 1         |
| Hs6st2_j2        | 0.711454  | 0.396717        | 0          | 1         | 1         |
| Hs6st2           | 0.716313  | 0.623404        | 0          | 1         | 1         |
| Gpc4             | 1.03131   | 1.18688         | 0.202698   | 0.242949  | 0.590422  |
| Gpc3_j1          | 5.62802   | 8.35286         | 0.569642   | 0.0079643 | 0.0722989 |
| Gpc3             | 7.72799   | 9.56887         | 0.308255   | 0.0131272 | 0.104745  |
| Gm14586          | 101.245   | 119.185         | 0.235349   | 0.0143783 | 0.111597  |
| Fam122b          | 1.93013   | 1.56871         | -0.299118  | 0.157598  | 0.491651  |
| Fam122b_j2       | 0.103039  | 0 -1.79769e+308 |            | 0.004948  | 1         |
| Mospd1_j4        | 2.87096   | 2.50177         | 0          | 1         | 1         |
| Gm1862           | 1.8177    | 1.78069         | -0.0296778 | 0.905189  | 0.969928  |
| Mmgt1_j1         | 0.261506  | 0.241156        | 0          | 1         | 1         |
| Mmgt1            | 5.87116   | 4.51283         | 0          | 1         | 1         |
| Arhgef6_j2       | 3.13259   | 2.81786         | 0          | 1         | 1         |
| Arhgef6_j5       | 1.31969   | 1.20757         | 0          | 1         | 1         |
| Rbmx_j4          | 4.02955   | 4.84592         | 0.266151   | 0.0642996 | 0.301101  |
| Rbmx             | 0.818337  | 0.72528         | -0.174156  | 0.362784  | 0.697059  |
| Fgf13_j1         | 14.215    | 8.11496         | 0          | 1         | 1         |
| Fgf13            | 76.0089   | 52.9596         | 0          | 1         | 1         |
| Fgf13_j2         | 0.892991  | 0.850908        | -0.0696418 | 0.935921  | 0.980349  |
| Gm5637           | 74.9033   | 94.2342         | 0.331221   | 0.0001893 | 0.0036634 |
| Mcf2_j5          | 0.0854075 | 0 -1.79769e+308 |            | 0.0014384 | 1         |
| Mcf2_j4          | 0.192791  | 0.0417707       | -2.20647   | 0.0326734 | 0.196609  |
| Mcf2             | 0.660174  | 0.367001        | -0.847061  | 0.0065899 | 0.0628169 |
| Atp11c_j3        | 0.657382  | 0.538145        | -0.288737  | 0.502036  | 0.786029  |
| Atp11c_j1        | 0.881723  | 5.86E-05        | -13.8775   | 0.835813  | 0.947255  |
| Atp11c           | 0.793725  | 0.571981        | -0.472672  | 0.0879502 | 0.363161  |
| Slitrk4          | 3.05352   | 1.68479         | 0          | 1         | 1         |
| Gm14681          | 106.946   | 113.397         | 0.0845101  | 0.410885  | 0.730544  |
| Ids_j7           | 1.39314   | 1.26425         | 0          | 1         | 1         |
| Ids_j4           | 0.388302  | 0.0795825       | 0          | 1         | 1         |
| BC023829         | 14.2242   | 11.859          | -0.262368  | 0.0159449 | 0.120124  |

|           |           |           |               |           |           |
|-----------|-----------|-----------|---------------|-----------|-----------|
| Cd99l2_j7 | 0.626449  | 0.5986    | 0             | 1         | 1         |
| Cd99l2    | 9.33335   | 14.8711   | 0             | 1         | 1         |
| Cd99l2_j8 | 8.0283    | 0         | 0             | 1         | 1         |
| Gabre_j1  | 0.243799  | 0.171684  | -0.505937     | 0.197688  | 0.540689  |
| Gabra3    | 1.9152    | 0.533973  | 0             | 1         | 1         |
| Cetn2     | 20.8876   | 20.3508   | -0.0375615    | 0.748309  | 0.912384  |
| Xlr4c_j5  | 0.370094  | 0.167477  | -1.14393      | 0.336934  | 0.677294  |
| Haus7     | 3.72145   | 3.33364   | -0.158764     | 0.41714   | 0.73427   |
| Haus7     | 1.56773   | 1.63948   | 0.0645615     | 0.846071  | 0.951378  |
| Pnck      | 1.03388   | 0.391104  | 0             | 1         | 1         |
| Pnck      | 4.63145   | 2.84723   | 0             | 1         | 1         |
| Bcap31_j1 | 60.8294   | 61.523    | 0.0163569     | 0.862945  | 0.956568  |
| Idh3g_j4  | 4.31622   | 5.62868   | 0.383028      | 0.103113  | 0.398042  |
| Pdzd4_j2  | 1.94389   | 1.0695    | -0.862008     | 0.0007816 | 0.0117553 |
| Pdzd4     | 5.80482   | 5.90035   | 0.0235486     | 0.856577  | 0.95465   |
| L1cam     | 6.31976   | 7.23026   | 0             | 1         | 1         |
| Naa10_j4  | 8.64339   | 9.1435    | 0.0811505     | 0.670445  | 0.875338  |
| Naa10     | 4.79363   | 5.37616   | 0.165457      | 0.452058  | 0.757196  |
| Hcfc1_j1  | 0.147401  | 0         | -1.79769e+308 | 4.64E-08  | 2.75E-06  |
| Hcfc1_j3  | 15.4781   | 15.5103   | 0.00299276    | 0.981097  | 0.994152  |
| Irak1_j5  | 4.5362    | 4.51263   | 0             | 1         | 1         |
| Irak1     | 4.05056   | 3.27734   | 0             | 1         | 1         |
| Mecp2     | 0.973023  | 0.46611   | 0             | 1         | 1         |
| Mecp2     | 0.626428  | 0.587539  | 0             | 1         | 1         |
| Flna_j11  | 0.0816203 | 0.0363087 | -1.16861      | 0.118067  | 1         |
| Flna_j9   | 0         | 0.180058  | 1.79769e+308  | 3.88E-06  | 0.0001361 |
| Lage3_j1  | 1.39885   | 1.43681   | 0.0386352     | 0.933575  | 0.979831  |
| Lage3     | 6.42394   | 7.48984   | 0.221475      | 0.262885  | 0.611724  |
| Ubl4      | 21.244    | 25.0013   | 0             | 1         | 1         |
| Fam3a     | 9.89807   | 10.7006   | 0.112469      | 0.34679   | 0.685741  |
| G6pdx     | 1.01871   | 0.915791  | -0.153654     | 0.512505  | 0.792284  |
| Gab3_j5   | 0.133796  | 0.0524542 | -1.3509       | 0.297244  | 1         |
| Gab3_j6   | 0.100047  | 0         | -1.79769e+308 | 0.0521109 | 1         |
| Mpp1      | 15.1602   | 14.8901   | 0             | 1         | 1         |
| F8_j1     | 0.245437  | 0.239573  | -0.0348823    | 0.908721  | 0.971225  |
| F8_j6     | 0.0532736 | 0         | -1.79769e+308 | 0.00014   | 1         |
| Rab39b    | 23.4224   | 21.1341   | -0.148321     | 0.113071  | 0.418521  |
| Pls3_j1   | 1.42291   | 1.29324   | 0             | 1         | 1         |
| Pls3_j2   | 27.4791   | 32.7648   | 0             | 1         | 1         |
| Pls3_j3   | 44.5335   | 32.917    | 0             | 1         | 1         |
| Gm14706   | 3.41677   | 4.2511    | 0.315205      | 0.413567  | 0.73232   |
| Gm8722    | 39.5697   | 38.2571   | -0.0486706    | 0.649232  | 0.865193  |
| Prkx_j3   | 1.95359   | 1.98195   | 0             | 1         | 1         |
| Prkx      | 12.3938   | 12.9488   | 0             | 1         | 1         |
| Prrg1     | 0.404503  | 0.363816  | -0.152941     | 0.719376  | 0.899124  |
| Prrg1     | 2.09997   | 1.12202   | -0.904277     | 5.30E-05  | 0.0012544 |
| Gm8822    | 45.4144   | 43.1921   | -0.0723799    | 0.415617  | 0.733384  |

|                  |           |           |            |           |           |
|------------------|-----------|-----------|------------|-----------|-----------|
| Gyk              | 7.37588   | 6.78664   | -0.120117  | 0.320096  | 0.663432  |
| Gyk_j1           | 1.51216   | 1.43279   | -0.077785  | 0.755863  | 0.915824  |
| Pola1_j7         | 0.986926  | 0.86068   | -0.197464  | 0.550436  | 0.815351  |
| Pola1            | 0.886214  | 0.558154  | -0.666992  | 0.0044518 | 0.0465521 |
| Pdk3_j3          | 1.80723   | 1.00455   | 0          | 1         | 1         |
| Zfx              | 4.68E-05  | 0.227142  | 0          | 1         | 1         |
| Zfx              | 0.48337   | 0.12715   | 0          | 1         | 1         |
| Eif2s3x_j1       | 0.661261  | 0.610279  | -0.115751  | 0.845563  | 0.951207  |
| Maged1           | 184.952   | 224.401   | 0.278932   | 0.0017729 | 0.0226866 |
| Zxda             | 1.54436   | 1.30872   | -0.23886   | 0.136649  | 0.459682  |
| Arhgef9          | 2.35673   | 1.69074   | 0          | 1         | 1         |
| Arhgef9_j7       | 2.73189   | 1.39876   | 0          | 1         | 1         |
| Arhgef9_j1       | 0.743156  | 0.353264  | 0          | 1         | 1         |
| Arhgef9_j2       | 0.746372  | 0.212425  | 0          | 1         | 1         |
| Fam123b          | 2.36438   | 1.29357   | 0          | 1         | 1         |
| Zc4h2            | 8.03623   | 7.61361   | -0.0779372 | 0.540118  | 0.808758  |
| Las1l            | 9.77727   | 10.6566   | 0.124239   | 0.27126   | 0.620215  |
| Ophn1_j1         | 0.335084  | 0.825056  | 0          | 1         | 1         |
| Ophn1            | 3.69894   | 2.89953   | 0          | 1         | 1         |
| Pja1_j2          | 19.298    | 19.6221   | 0          | 1         | 1         |
| Pja1_j1          | 32.9962   | 30.4621   | 0          | 1         | 1         |
| Pdzd11           | 31.1086   | 31.311    | 0.00935817 | 0.934918  | 0.980088  |
| Pdzd11           | 3.60123   | 3.26635   | -0.140812  | 0.551455  | 0.815825  |
| Slc7a3_j2        | 0.329844  | 0.247332  | -0.415337  | 0.476094  | 0.771923  |
| Slc7a3           | 1.72915   | 2.75298   | 0.670931   | 0.000474  | 0.007784  |
| Snx12            | 4.06615   | 3.5447    | -0.198     | 0.100832  | 0.393219  |
| Il2rg_j3         | 0.231677  | 0.384698  | 0.731612   | 0.355813  | 0.691682  |
| Il2rg_j4         | 0.0748397 | 0.0959842 | 0.358992   | 0.79209   | 1         |
| Il2rg            | 0.624632  | 1.11102   | 0.830809   | 0.0143096 | 0.111157  |
| Zmym3_j5         | 2.85104   | 3.66865   | 0          | 1         | 1         |
| Zmym3_j12        | 0.724093  | 0.713143  | 0          | 1         | 1         |
| Rgag4_j1         | 0.125783  | 0.270459  | 0          | 1         | 1         |
| Rgag4            | 0.749531  | 1.09455   | 0          | 1         | 1         |
| Rgag4            | 0.607926  | 0.755497  | 0          | 1         | 1         |
| Rps4x_j2         | 2.1374    | 2.40283   | 0.168877   | 0.574159  | 0.827905  |
| Rps4x_j5         | 9.88088   | 14.2863   | 0.531919   | 0.0417522 | 0.230484  |
| Hdac8            | 3.55721   | 3.66484   | 0.0430031  | 0.796643  | 0.932312  |
| Phka1_j5         | 0.945893  | 0.448545  | 0          | 1         | 1         |
| Phka1            | 3.72446   | 2.31878   | 0          | 1         | 1         |
| Dmrtc1a_j2       | 0.681807  | 0.35011   | -0.961553  | 0.083862  | 0.353169  |
| XLOC_036762      | 0.11825   | 0.0495709 | -1.25427   | 0.311879  | 1         |
| Gm6206           | 17.4093   | 19.1585   | 0.138128   | 0.176402  | 0.515064  |
| Nap1l2           | 34.1065   | 24.9924   | 0          | 1         | 1         |
| B230206F22Rik_j1 | 0.0911094 | 0.0872114 | -0.0630821 | 0.958486  | 1         |
| B230206F22Rik_j1 | 0.245322  | 0.118601  | -1.04857   | 0.0192969 | 0.137487  |
| B230206F22Rik_j4 | 0.99265   | 0.794607  | -0.321043  | 0.284735  | 0.633445  |
| Slc16a2_j2       | 0.371836  | 0         | 0          | 1         | 1         |

|                  |           |           |            |           |           |
|------------------|-----------|-----------|------------|-----------|-----------|
| Slc16a2          | 5.00043   | 4.51459   | 0          | 1         | 1         |
| Rlim             | 5.91889   | 5.02359   | 0          | 1         | 1         |
| Rlim             | 2.91719   | 1.86031   | 0          | 1         | 1         |
| C77370_j1        | 0.154002  | 0.197768  | 0.360864   | 0.363155  | 0.697221  |
| Abcb7            | 6.52353   | 5.19487   | 0          | 1         | 1         |
| Zdhhc15          | 3.84707   | 3.31509   | 0          | 1         | 1         |
| Zdhhc15_j4       | 0.242279  | 0         | 0          | 1         | 1         |
| Magee2           | 1.97375   | 1.92419   | -0.0366894 | 0.843857  | 0.950605  |
| 5530601H04Rik    | 1.95502   | 1.64153   | -0.252144  | 0.384093  | 0.71322   |
| 5530601H04Rik    | 1.05864   | 0.901796  | -0.231344  | 0.47279   | 0.769697  |
| 5330434G04Rik_j2 | 0.670897  | 1.1478    | 0          | 1         | 1         |
| 5330434G04Rik    | 1.24465   | 1.28371   | 0          | 1         | 1         |
| Atrx_j3          | 3.76077   | 3.6066    | 0          | 1         | 1         |
| Atrx_j6          | 0.522056  | 0.273598  | 0          | 1         | 1         |
| Magt1            | 2.8234    | 2.65839   | 0          | 1         | 1         |
| Magt1            | 5.15755   | 5.28527   | 0          | 1         | 1         |
| Taf9b            | 6.92013   | 6.40293   | 0          | 1         | 1         |
| Itm2a            | 13.8146   | 13.9322   | 0.0122263  | 0.917504  | 0.974311  |
| 2610002M06Rik    | 7.84111   | 6.60282   | -0.247974  | 0.0168489 | 0.124999  |
| Brwd3_j4         | 0.0629731 | 0.0706151 | 0.165242   | 0.76101   | 1         |
| Brwd3_j3         | 0.0667275 | 4.65E-05  | -10.4858   | 0.810839  | 1         |
| Rps6ka6_j2       | 0.237795  | 0.0495538 | -2.26265   | 0.001566  | 0.0204522 |
| Rps6ka6_j1       | 0.0644596 | 0.175363  | 1.44388    | 0.0096479 | 0.0834605 |
| Hdx_j1           | 0.0764141 | 0.0429731 | -0.830404  | 0.57225   | 1         |
| Chm_j6           | 0.0728437 | 0         | 0          | 1         | 1         |
| Chm              | 5.08109   | 4.20509   | 0          | 1         | 1         |
| Nap1l3           | 14.2723   | 11.1139   | 0          | 1         | 1         |
| Pcdh19           | 1.02964   | 0.905334  | -0.185624  | 0.281584  | 0.630082  |
| Pcdh19_j1        | 0.266124  | 0.212031  | -0.32782   | 0.363052  | 0.697188  |
| Tspan6           | 3.46707   | 3.68818   | 0.0891912  | 0.614006  | 0.847685  |
| Trmt2b           | 6.45604   | 5.19902   | -0.31241   | 0.0118933 | 0.0975503 |
| Gla              | 5.23893   | 4.60008   | -0.187613  | 0.0902238 | 0.368804  |
| Armcx6           | 0.0839058 | 0.079517  | 0          | 1         | 1         |
| Armcx6_j3        | 0.860187  | 0.579471  | 0          | 1         | 1         |
| Armcx2           | 7.66333   | 8.33541   | 0          | 1         | 1         |
| Armcx2_j2        | 6.65612   | 8.63185   | 0          | 1         | 1         |
| Zmat1_j2         | 0.254603  | 0.129908  | 0          | 1         | 1         |
| Zmat1            | 0.413329  | 0.306592  | 0          | 1         | 1         |
| Zmat1_j1         | 0.399033  | 0.109072  | 0          | 1         | 1         |
| Tceal6           | 4.77585   | 2.3085    | -1.0488    | 1.03E-05  | 0.0003179 |
| Bex2             | 30.7304   | 34.3762   | 0          | 1         | 1         |
| Bex2_j1          | 88.436    | 87.2621   | 0          | 1         | 1         |
| Tceal8           | 33.4677   | 31.8393   | 0          | 1         | 1         |
| Morf4l2_j3       | 0.176473  | 0.449086  | 0          | 1         | 1         |
| Rab9b            | 1.66178   | 1.11069   | 0          | 1         | 1         |
| Tmsb15b2         | 1.21473   | 1.15771   | -0.0693588 | 0.841059  | 0.949824  |
| Tmsb15l          | 2.85429   | 2.33833   | -0.287653  | 0.171164  | 0.507955  |

|                  |           |            |               |           |           |
|------------------|-----------|------------|---------------|-----------|-----------|
| Tmsb15l_j1       | 0.0668781 | 0          | -1.79769e+308 | 0.0641562 | 1         |
| Mcart6           | 9.58516   | 10.1715    | 0             | 1         | 1         |
| Ripply1          | 0.495745  | 0.664988   | 0.423729      | 0.338366  | 0.678732  |
| Morc4            | 1.32763   | 0.848616   | -0.645667     | 0.0035708 | 0.0395722 |
| Rbm41            | 0.960136  | 0.828125   | -0.21339      | 0.341545  | 0.681458  |
| Tsc22d3          | 15.6979   | 12.8479    | 0             | 1         | 1         |
| Tsc22d3          | 58.6346   | 51.5144    | 0             | 1         | 1         |
| Psm10            | 8.43648   | 8.12244    | -0.054727     | 0.703826  | 0.891632  |
| Psm10            | 1.562     | 1.79256    | 0.198631      | 0.516054  | 0.794692  |
| Kcne1l           | 1.01054   | 0.899129   | -0.168531     | 0.526456  | 0.801051  |
| Acsl4            | 10.7183   | 11.2216    | 0             | 1         | 1         |
| Acsl4            | 1.57394   | 1.81802    | 0             | 1         | 1         |
| Ammecr1          | 0.456787  | 0.464673   | 0             | 1         | 1         |
| Lhfp1            | 2.48226   | 1.07899    | 0             | 1         | 1         |
| Lhfp1_j1         | 0.413472  | 0.218485   | 0             | 1         | 1         |
| Amot_j2          | 0.522638  | 0.36998    | -0.498366     | 0.0877651 | 0.362622  |
| Amot_j3          | 0.373245  | 0.343302   | -0.120642     | 0.680703  | 0.879921  |
| Gm5644           | 44.4455   | 47.5491    | 0.0973797     | 0.38601   | 0.714331  |
| Gm8261           | 1.9093    | 1.83315    | -0.058719     | 0.785751  | 0.928253  |
| Lrch2_j6         | 0.430408  | 0          | 0             | 1         | 1         |
| Lrch2_j4         | 0.459602  | 0.350295   | 0             | 1         | 1         |
| Tmem29           | 8.74175   | 9.21455    | 0.0759909     | 0.633365  | 0.857531  |
| Tro_j1           | 0.765551  | 0.00269346 | 0             | 1         | 1         |
| Maged2           | 15.8656   | 14.5339    | 0             | 1         | 1         |
| Gnl3l            | 31.4276   | 23.4608    | 0             | 1         | 1         |
| Tsr2             | 8.30114   | 7.21973    | 0             | 1         | 1         |
| A230072E10Rik_j1 | 0.626322  | 0.504148   | -0.313058     | 0.448982  | 0.755281  |
| 2900056M20Rik    | 2.12085   | 1.60341    | 0             | 1         | 1         |
| 2900056M20Rik_j2 | 0.555286  | 0.530954   | 0             | 1         | 1         |
| Tspyl2_j2        | 0.927036  | 0.680702   | 0             | 1         | 1         |
| Tspyl2           | 12.305    | 12.2696    | 0             | 1         | 1         |
| Gpr173_j3        | 0.122737  | 0.12284    | 0.00120612    | 0.998318  | 1         |
| Shroom2_j3       | 0.146791  | 0.0725676  | 0             | 1         | 1         |
| Shroom2_j2       | 1.143     | 0.814422   | 0             | 1         | 1         |
| Shroom2          | 0.426892  | 0.492391   | 0             | 1         | 1         |
| Kctd12b          | 0.548863  | 0.387061   | -0.503887     | 0.113438  | 0.419202  |
| Kctd12b          | 0.466192  | 0.435205   | -0.0992297    | 0.753555  | 0.91482   |
| Sat1_j1          | 11.0491   | 12.9482    | 0             | 1         | 1         |
| Sat1             | 12.5665   | 12.341     | 0             | 1         | 1         |
| Sat1_j5          | 5.31787   | 5.14476    | 0             | 1         | 1         |
| Prdx4            | 8.07167   | 7.82137    | -0.0454462    | 0.759058  | 0.917041  |
| Ptchd1           | 0.888619  | 0.937128   | 0.0766814     | 0.662143  | 0.871836  |
| Sms_j5           | 1.56934   | 1.44396    | -0.120128     | 0.758385  | 0.916938  |
| Mbtps2_j2        | 0.826483  | 1.18091    | 0             | 1         | 1         |
| Mbtps2           | 2.33291   | 2.26471    | 0             | 1         | 1         |
| Mbtps2_j3        | 0.62      | 0.343634   | 0             | 1         | 1         |
| Yy2              | 0.539945  | 0.575724   | 0             | 1         | 1         |

|               |            |                        |            |           |           |
|---------------|------------|------------------------|------------|-----------|-----------|
| Cnksr2_j1     | 0.815423   | 0.000550742            | 0          | 1         | 1         |
| Cnksr2        | 1.19668    | 0.496987               | 0          | 1         | 1         |
| Pdha1_j2      | 0.650982   | 0                      | 0          | 1         | 1         |
| Pdha1         | 27.7332    | 26.3146                | 0          | 1         | 1         |
| Ppef1_j2      | 19.2395    | 25.6016                | 0          | 1         | 1         |
| Ppef1_j7      | 0.00541368 | 3.79096                | 0          | 1         | 1         |
| Ppef1_j5      | 6.25239    | 11.5142                | 0          | 1         | 1         |
| Cdkl5_j2      | 0.149155   | 0.0244858              | -2.6068    | 0.084824  | 0.355514  |
| Reps2_j7      | 0.258758   | 0.313129               | 0          | 1         | 1         |
| Reps2_j6      | 0.796268   | 0.128877               | 0          | 1         | 1         |
| Reps2_j5      | 0.806089   | 0.372202               | 0          | 1         | 1         |
| Gm15201       | 0.136897   | 0.0832924              | -0.716834  | 0.495303  | 1         |
| Gm15201_j1    | 0.175219   | 0.166197               | -0.0762711 | 0.916945  | 0.97399   |
| Txlng_j1      | 0.144403   | 0.146508               | 0.0208852  | 0.967079  | 0.99061   |
| Syap1         | 12.2462    | 12.9898                | 0.0850491  | 0.459794  | 0.761644  |
| S100g         | 0.548692   | 0.577342               | 0          | 1         | 1         |
| 1700045l19Rik | 0.204474   | 0.16387                | -0.319366  | 0.599302  | 0.841178  |
| Zrsr2_j2      | 0.534253   | 0.324398               | -0.719756  | 0.0684968 | 0.313436  |
| Car5b         | 1.87091    | 1.59202                | -0.232887  | 0.241758  | 0.588944  |
| Bmx           | 0.274771   | 0.245133               | -0.164664  | 0.6944    | 0.887283  |
| Mospd2        | 4.80703    | 5.12958                | 0          | 1         | 1         |
| Ofd1          | 1.43381    | 1.41486                | 0          | 1         | 1         |
| Rab9          | 19.7343    | 18.0592                | -0.127975  | 0.283246  | 0.631732  |
| Tceanc        | 0.320894   | 0.507283               | 0.660694   | 0.0366911 | 0.211804  |
| Tmsb4x        | 927.581    | 1218.73                | 0.39383    | 4.79E-05  | 0.0011513 |
| Prps2_j1      | 3.23427    | 2.80343                | 0          | 1         | 1         |
| Prps2         | 3.14377    | 2.63858                | 0          | 1         | 1         |
| Frmpd4_j5     | 0.0589176  | 0 -1.79769e+308        | 0.0002881  | 0.0002881 | 1         |
| Msl3          | 1.74554    | 1.7115                 | -0.0284104 | 0.874976  | 0.96023   |
| Msl3_j5       | 0.176907   | 0.105965               | -0.739401  | 0.205374  | 0.549744  |
| Hccs          | 2.41573    | 2.02668                | -0.253339  | 0.236986  | 0.583799  |
| G530011006Rik | 0.625474   | 0.467098               | -0.421224  | 0.0304299 | 0.187508  |
| LOC100270707  | 0.0785846  | 0.208239               | 1.40592    | 0.0887474 | 0.365085  |
| Gpkow         | 4.04094    | 4.78075                | 0.242547   | 0.0816462 | 0.348078  |
| Gpkow_j4      | 2.94686    | 2.46589                | -0.257073  | 0.239681  | 0.587096  |
| Wdr45_j3      | 1.31971    | 1.30281                | -0.0185989 | 0.949435  | 0.985359  |
| Tcfe3         | 0.245809   | 0.29234                | 0          | 1         | 1         |
| Gripap1       | 6.52771    | 7.91315                | 0          | 1         | 1         |
| Kcnd1_j2      | 0.0399339  | 0.112134               | 0          | 1         | 1         |
| Pim2          | 11.9617    | 10.9006                | -0.134013  | 0.241616  | 0.588714  |
| Timm17b       | 5.30853    | 5.54996                | 0.0641654  | 0.61293   | 0.84737   |
| Xk_j1         | 0.733435   | 0.1702                 | 0          | 1         | 1         |
| Usp9x_j15     | 0.0858538  | 0.00563623             | -3.92908   | 0.0795235 | 1         |
| Rp2h_j1       | 0.182362   | 0.0587047              | -1.63525   | 0.254348  | 0.602682  |
| Phf16         | 0          | 0.0691528 1.79769e+308 | 0.0190427  | 0.0190427 | 1         |
| Rbm10_j1      | 0.762515   | 0.8506                 | 0.157717   | 0.536467  | 0.806869  |
| Uba1_j7       | 41.4437    | 56.0922                | 0          | 1         | 1         |

|                   |           |           |              |           |          |
|-------------------|-----------|-----------|--------------|-----------|----------|
| Cdk16             | 27.9718   | 23.3097   | 0            | 1         | 1        |
| Araf_j1           | 24.2207   | 14.1618   | 0            | 1         | 1        |
| Dock11_j7         | 1.44813   | 0.800084  | 0            | 1         | 1        |
| Zcchc12_j2        | 0         | 0.269862  | 0            | 1         | 1        |
| Zcchc12_j3        | 0.655753  | 0.366892  | 0            | 1         | 1        |
| Gm6274            | 38.6562   | 44.511    | 0.203464     | 0.0619717 | 0.294516 |
| Slc25a43_j1       | 0.364767  | 0.295385  | -0.304379    | 0.675086  | 0.877609 |
| Slc25a43_j4       | 0         | 0.0559736 | 1.79769e+308 | 0.115778  | 1        |
| XLOC_036226       | 0.064051  | 0.096225  | 0.587192     | 0.482761  | 1        |
| Slc25a5           | 1.09336   | 0.54986   | -0.991628    | 0.0343104 | 0.202972 |
| Mcts1_j1          | 0         | 0.061781  | 0            | 1         | 1        |
| Gria3_j7          | 0.0446373 | 0.0630799 | 0.498931     | 0.587876  | 1        |
| Gria3_j1          | 0.35363   | 0.222123  | -0.670883    | 0.109009  | 0.410746 |
| Gria3_j13         | 0.399479  | 0.0165619 | -4.59218     | 0.0099708 | 0.08545  |
| Stag2_j1          | 0.127302  | 0.159548  | 0            | 1         | 1        |
| Ocrl_j5           | 12.3784   | 11.7933   | -0.0698503   | 0.54853   | 0.814203 |
| Bcorl1_j4         | 1.29127   | 1.13066   | -0.191622    | 0.532012  | 0.803917 |
| Rab33a_j1         | 9.40922   | 12.0372   | 0.355347     | 0.0790268 | 0.341089 |
| Slc25a14_j4       | 0.266672  | 0.199465  | 0            | 1         | 1        |
| Arhgap36_j2       | 0.74945   | 0.446611  | 0            | 1         | 1        |
| XLOC_036267       | 0.153725  | 0.142457  | -0.109825    | 0.83222   | 0.945814 |
| Ddx26b            | 2.54039   | 2.62239   | 0            | 1         | 1        |
| Ddx26b_j12        | 3.6232    | 4.24146   | 0            | 1         | 1        |
| Fhl1_j2           | 15.7539   | 25.2734   | 0            | 1         | 1        |
| Fhl1_j4           | 0         | 0.746552  | 0            | 1         | 1        |
| Fhl1_j5           | 7.46896   | 6.94942   | 0            | 1         | 1        |
| C230004F18Rik_j4  | 0.478174  | 0.671435  | 0.489712     | 0.0682231 | 0.312683 |
| C230004F18Rik_j10 | 0.147623  | 0.164811  | 0.158897     | 0.889211  | 0.964827 |
| Slitrk2_j4        | 1.9132    | 1.98842   | 0            | 1         | 1        |
| Fmr1_j2           | 1.93106   | 1.87626   | 0            | 1         | 1        |
| Mamld1_j1         | 0.0428126 | 0.105666  | 1.3034       | 0.124933  | 1        |
| Mtmr1_j3          | 1.76728   | 1.94146   | 0            | 1         | 1        |
| Vma21_j1          | 0.169096  | 0.427791  | 0            | 1         | 1        |
| Vma21_j3          | 1.08754   | 1.18592   | 0            | 1         | 1        |
| Nsdhl_j2          | 10.7849   | 16.8079   | 0            | 1         | 1        |
| F8a               | 7.82917   | 8.70719   | 0.153348     | 0.198185  | 0.54132  |
| Atp2b3_j3         | 0.232277  | 0.0675656 | -1.78148     | 0.0305564 | 0.187979 |
| Plxb3_j4          | 0         | 0.0508648 | 0            | 1         | 1        |
| Ssr4              | 22.7533   | 23.0265   | 0.0172177    | 0.886651  | 0.964085 |
| Emd               | 0.0985372 | 0.123634  | 0.32734      | 0.770717  | 1        |
| Plxna3_j10        | 0         | 0.256458  | 0            | 1         | 1        |
| Ikbkg             | 1.24235   | 1.25218   | 0            | 1         | 1        |
| Brcc3             | 16.8366   | 14.4941   | -0.216135    | 0.068389  | 0.31317  |
| Brcc3             | 0.421253  | 0.332379  | -0.341857    | 0.210367  | 0.554929 |
| Tbl1x             | 3.041     | 2.19965   | 0            | 1         | 1        |
| Gm6954            | 0.894512  | 1.16681   | 0.383399     | 0.573851  | 0.827828 |
| Dmd_j13           | 2.3361    | 2.82102   | 0            | 1         | 1        |

|                  |           |             |              |           |          |
|------------------|-----------|-------------|--------------|-----------|----------|
| Tab3_j7          | 0.297995  | 0.222764    | 0            | 1         | 1        |
| Pcyt1b           | 7.44366   | 8.74397     | 0            | 1         | 1        |
| Klhl15_j5        | 0.319272  | 0.131666    | -1.27791     | 0.257082  | 0.605894 |
| Apoo_j5          | 1.67926   | 1.71177     | 0.0276582    | 0.939448  | 0.981547 |
| Stard8_j3        | 0.29383   | 3.70E-05    | 0            | 1         | 1        |
| Stard8           | 0.559022  | 1.02441     | 0            | 1         | 1        |
| XLOC_036367      | 0.0470136 | 0.0686408   | 0.54599      | 0.794779  | 1        |
| Kif4_j1          | 0.0588797 | 0.106427    | 0.854019     | 0.574675  | 1        |
| Gdpd2_j4         | 0.408476  | 0.110206    | -1.89005     | 0.0154786 | 0.117492 |
| Dlg3             | 0.316021  | 0.41        | 0            | 1         | 1        |
| Dlg3_j7          | 0.135337  | 0.0976933   | 0            | 1         | 1        |
| Dlg3_j8          | 0.509963  | 0.505382    | 0            | 1         | 1        |
| Med12_j6         | 0.340253  | 0           | 0            | 1         | 1        |
| Nono_j5          | 0.0520889 | 0.0788488   | 0.598111     | 0.694298  | 1        |
| Ogt_j10          | 2.56608   | 2.7534      | 0.101646     | 0.530052  | 0.802912 |
| Chic1_j2         | 0.322214  | 0.328268    | 0.0268562    | 0.971833  | 0.991962 |
| 2610029G23Rik_j7 | 0.234104  | 0.435454    | 0.895372     | 0.367714  | 0.701085 |
| Atp7a_j2         | 0.424448  | 0.000518566 | -9.67684     | 0.258292  | 0.60698  |
| Pgk1_j3          | 0.951552  | 9.57232     | 0            | 1         | 1        |
| Zfp711_j5        | 0.116559  | 0.160077    | 0.457702     | 0.479441  | 0.773601 |
| Diap2_j6         | 1.8197    | 1.88965     | 0.0544156    | 0.749845  | 0.913026 |
| Cstf2_j5         | 5.81624   | 4.52169     | 0            | 1         | 1        |
| Tmem35_j2        | 0.972105  | 1.02382     | 0            | 1         | 1        |
| Drp2             | 2.31992   | 3.12103     | 0            | 1         | 1        |
| Armcx3_j2        | 1.63922   | 1.36036     | 0            | 1         | 1        |
| Bhlhb9           | 2.16699   | 2.20527     | 0            | 1         | 1        |
| Bex4             | 0.153519  | 0.146666    | 0            | 1         | 1        |
| Wbp5_j1          | 0.413937  | 0.835686    | 0            | 1         | 1        |
| Ngfrap1_j2       | 13.9418   | 9.6487      | 0            | 1         | 1        |
| Ngfrap1_j1       | 1.67932   | 4.44495     | 0            | 1         | 1        |
| BC065397_j6      | 0.0593314 | 0.233563    | 0            | 1         | 1        |
| Plp1_j3          | 0.584002  | 0.39298     | 0            | 1         | 1        |
| Zcchc18_j4       | 47.3736   | 49.2433     | 0            | 1         | 1        |
| Zcchc18_j3       | 34.0323   | 34.3447     | 0            | 1         | 1        |
| Zcchc18_j5       | 2.42141   | 3.23174     | 0            | 1         | 1        |
| Frmpd3_j8        | 0.892576  | 0.219515    | 0            | 1         | 1        |
| Mid2             | 1.65402   | 1.01534     | 0            | 1         | 1        |
| Nxt2_j3          | 1.55234   | 0.984585    | 0            | 1         | 1        |
| Tmem164_j1       | 2.76832   | 2.14801     | 0            | 1         | 1        |
| Tmem164          | 4.10343   | 4.26325     | 0            | 1         | 1        |
| Tmem164_j5       | 0         | 0.18736     | 0            | 1         | 1        |
| Rgag1_j1         | 1.34592   | 1.4283      | 0            | 1         | 1        |
| Pak3_j1          | 0.297564  | 0           | 0            | 1         | 1        |
| Alas2            | 0         | 0.072308    | 1.79769e+308 | 0.0623006 | 1        |
| Fam120c_j1       | 2.60306   | 1.97458     | 0            | 1         | 1        |
| Phf8_j8          | 3.13172   | 2.96748     | -0.0777183   | 0.658721  | 0.870342 |
| Huwe1_j1         | 0.231173  | 0.188984    | 0            | 1         | 1        |



|                  |           |                        |           |           |           |
|------------------|-----------|------------------------|-----------|-----------|-----------|
| Kdm5c_j4         | 1.09546   | 0.928865               | 0         | 1         | 1         |
| AK013876_j2      | 1.44458   | 0.71948                | -1.00563  | 2.62E-05  | 0.0006919 |
| Smt3h1-ps        | 9.86758   | 10.4605                | 0.0841867 | 0.702383  | 0.890916  |
| Spin2_j2         | 0.106251  | 0 -1.79769e+308        | 0.0305637 |           | 1         |
| Acot9_j1         | 6.77462   | 7.66317                | 0.177801  | 0.24677   | 0.594321  |
| Smpx_j2          | 0.770559  | 0.558285               | -0.464904 | 0.302725  | 0.648644  |
| Mtap7d2_j4       | 23.7988   | 22.1642                | 0         | 1         | 1         |
| Mtap7d2_j14      | 36.6812   | 33.138                 | 0         | 1         | 1         |
| Mtap7d2_j13      | 78.2916   | 62.0858                | 0         | 1         | 1         |
| A830080D01Rik_j5 | 0.366017  | 0.486699               | 0         | 1         | 1         |
| A830080D01Rik_j4 | 0.70004   | 0.218489               | 0         | 1         | 1         |
| Sh3kbp1          | 1.8539    | 2.08769                | 0         | 1         | 1         |
| Sh3kbp1_j7       | 1.18831   | 1.37514                | 0         | 1         | 1         |
| Sh3kbp1          | 0.803295  | 1.22222                | 0         | 1         | 1         |
| Gpr64            | 0.885695  | 0.979611               | 0         | 1         | 1         |
| Gpr64            | 1.87326   | 1.42863                | 0         | 1         | 1         |
| Phka2_j1         | 2.14862   | 1.61715                | 0         | 1         | 1         |
| Phka2_j2         | 1.51994   | 1.56769                | 0         | 1         | 1         |
| Rbbp7_j2         | 14.6067   | 14.5283                | 0         | 1         | 1         |
| Rbbp7            | 9.21098   | 9.17609                | 0         | 1         | 1         |
| Ctps2            | 3.11163   | 2.44753                | 0         | 1         | 1         |
| Ctps2            | 1.54019   | 1.4865                 | 0         | 1         | 1         |
| Ap1s2            | 45.2822   | 39.5067                | -0.196846 | 0.0302382 | 0.186706  |
| Tmem27_j1        | 0.124965  | 0.177543               | 0.50665   | 0.501319  | 0.785385  |
| Ace2_j3          | 0.0868787 | 1.13E-05               | -12.9141  | 0.985229  | 1         |
| Pir              | 13.7981   | 11.9138                | -0.211843 | 0.114518  | 0.421109  |
| Fancb_j5         | 0         | 0.0608838 1.79769e+308 | 0.0609832 |           | 1         |
| Gemin8_j2        | 0.0587311 | 0.0750323              | 0.353387  | 0.747046  | 1         |
| Trappc2_j2       | 20.9165   | 17.3521                | 0         | 1         | 1         |
| AK051847_j3      | 0.15507   | 0.27487                | 0.825832  | 0.0956381 | 0.381799  |
| AK051847_j1      | 0.205696  | 0.0863055              | -1.25299  | 0.037408  | 0.214453  |
| Mid1_j1          | 0.680508  | 0.454244               | -0.583145 | 0.098543  | 0.388048  |
| Mid1_j2          | 0.168938  | 0.0343485              | -2.29818  | 0.0321556 | 0.194495  |
| Ccdc22_j5        | 1.7352    | 2.19275                | 0.337643  | 0.258061  | 0.606671  |
| Plp2_j1          | 9.88283   | 14.8475                | 0.587224  | 0.0004333 | 0.007219  |
| Plp2_j5          | 1.13415   | 0.947108               | -0.260005 | 0.54823   | 0.814119  |
| Magix_j1         | 0         | 0.0810148 1.79769e+308 | 0.0445236 |           | 1         |
| Hdac6            | 3.68499   | 4.20571                | 0         | 1         | 1         |
| Tbc1d25_j1       | 2.95156   | 2.92113                | 0         | 1         | 1         |
| Ftsj1_j1         | 4.6843    | 4.29258                | 0         | 1         | 1         |
| Srpx             | 1.36449   | 1.23583                | -0.142878 | 0.556057  | 0.818663  |
| Rpgr             | 0.763131  | 0.53723                | -0.50639  | 0.187333  | 0.528302  |
| Rpgr_j3          | 0.391022  | 0.112392               | -1.79871  | 0.01678   | 0.124626  |
| mKIAA1575_j4     | 0.470232  | 0.384315               | 0         | 1         | 1         |
| 1810030O07Rik    | 1.45348   | 1.69228                | 0.219462  | 0.182941  | 0.52343   |
| Med14_j5         | 11.1835   | 10.3203                | -0.115883 | 0.247276  | 0.594858  |
| Cask_j6          | 1.04876   | 1.62862                | 0         | 1         | 1         |

|                  |           |             |               |           |           |
|------------------|-----------|-------------|---------------|-----------|-----------|
| Efhc2_j4         | 0.0893822 | 0.339488    | 1.9253        | 0.0072996 | 0.0680375 |
| 4930578C19Rik_j1 | 0.0295424 | 0.076571    | 1.37401       | 0.272155  | 1         |
| Syn1_j3          | 67.0714   | 72.8617     | 0             | 1         | 1         |
| Syn1             | 2.53964   | 2.82623     | 0             | 1         | 1         |
| Gm6938_j1        | 0.174726  | 0.206698    | 0.242435      | 0.818251  | 0.941034  |
| Klhl13_j1        | 1.37645   | 0.643872    | 0             | 1         | 1         |
| Klhl13_j4        | 0         | 0.326451    | 0             | 1         | 1         |
| Sept6_j4         | 28.7254   | 33.9649     | 0.241715      | 0.010535  | 0.0888778 |
| Fam70a_j1        | 5.71691   | 4.39082     | 0             | 1         | 1         |
| Thoc2_j3         | 0         | 0.0568748   | 1.79769e+308  | 0.0606954 | 1         |
| Thoc2_j4         | 0.411385  | 0.461765    | 0.166671      | 0.6401    | 0.860827  |
| Smarca1_j3       | 1.79781   | 1.94901     | 0             | 1         | 1         |
| Aifm1_j3         | 0.138219  | 0.217057    | 0             | 1         | 1         |
| Zfp280c_j3       | 0.210381  | 0.0707926   | -1.57134      | 0.0592826 | 0.286245  |
| Enox2_j5         | 0.0672051 | 8.11E-05    | 0             | 1         | 1         |
| Enox2_j4         | 0         | 0.870933    | 0             | 1         | 1         |
| AK039412_j2      | 0.901374  | 0.0391755   | -4.5241       | 0.351351  | 0.688503  |
| Frmd7_j1         | 0.07309   | 0.0298686   | -1.29105      | 0.187352  | 1         |
| Hs6st2           | 14.2362   | 10.0311     | 0             | 1         | 1         |
| Hs6st2_j1        | 1.37147   | 0.81872     | 0             | 1         | 1         |
| Fam122b_j4       | 0.91812   | 0.000150578 | -12.574       | 0.880686  | 0.962006  |
| Mmgt1_j2         | 0.321143  | 0.931329    | 0             | 1         | 1         |
| Arhgef6_j6       | 0.213551  | 1.23319     | 0             | 1         | 1         |
| Arhgef6          | 4.11644   | 3.47918     | 0             | 1         | 1         |
| Arhgef6          | 0.644274  | 0.437454    | 0             | 1         | 1         |
| Rbmx             | 2.67023   | 1.38726     | -0.944725     | 0.0003288 | 0.0057586 |
| Fgf13_j2         | 39.7583   | 29.2877     | 0             | 1         | 1         |
| Atp11c_j2        | 0.1158    | 0.0750722   | -0.625289     | 0.563572  | 1         |
| Slitrk4_j2       | 0.822129  | 0.52051     | 0             | 1         | 1         |
| Ids_j1           | 38.5336   | 43.6428     | 0             | 1         | 1         |
| Ids_j2           | 1.92752   | 1.51125     | 0             | 1         | 1         |
| Cd99l2_j1        | 11.2852   | 12.7391     | 0             | 1         | 1         |
| Cd99l2_j2        | 0.894104  | 0           | 0             | 1         | 1         |
| Bcap31           | 23.2275   | 22.86       | -0.0230066    | 0.844099  | 0.950736  |
| ldh3g_j1         | 58.9294   | 56.839      | -0.0521059    | 0.580716  | 0.831731  |
| Pdzd4_j3         | 0.202782  | 0           | -1.79769e+308 | 2.47E-06  | 9.16E-05  |
| L1cam_j1         | 0.499835  | 0.579692    | 0             | 1         | 1         |
| Arhgap4_j3       | 0.181037  | 0.08343     | -1.11765      | 0.196809  | 0.539631  |
| Naa10_j1         | 2.66426   | 2.96482     | 0.154208      | 0.619614  | 0.850756  |
| Renbp            | 0.356585  | 0.488146    | 0.453067      | 0.427629  | 0.741838  |
| Hcfc1            | 4.80914   | 4.64834     | -0.0490634    | 0.657866  | 0.869724  |
| Irak1_j1         | 0         | 0.7196      | 0             | 1         | 1         |
| Flna_j1          | 20.0565   | 26.8083     | 0.418612      | 0.0026137 | 0.0309208 |
| Flna_j2          | 4.78912   | 6.45053     | 0.429658      | 0.0011637 | 0.0161276 |
| Flna_j3          | 0.110874  | 0.0851782   | -0.38037      | 0.467288  | 1         |
| Slc10a3          | 3.19167   | 3.08242     | 0             | 1         | 1         |
| G6pdx_j2         | 1.10926   | 0.974344    | -0.187099     | 0.566464  | 0.824486  |

|                  |           |           |             |           |          |
|------------------|-----------|-----------|-------------|-----------|----------|
| Gyk              | 0.46865   | 0.273577  | -0.776561   | 0.110518  | 0.413788 |
| Zfx_j3           | 1.17121   | 1.46176   | 0           | 1         | 1        |
| Maged1_j1        | 21.8571   | 33.1576   | 0.60124     | 2.54E-06  | 9.41E-05 |
| Arhgef9_j3       | 3.40657   | 3.10073   | 0           | 1         | 1        |
| Arhgef9_j6       | 0.961483  | 0.626696  | 0           | 1         | 1        |
| Las1l_j3         | 0.56616   | 0.576664  | 0.0265206   | 0.960536  | 0.988865 |
| Snx12_j1         | 9.70025   | 10.3735   | 0.0968129   | 0.503334  | 0.787002 |
| Il2rg_j2         | 0.43515   | 0.579644  | 0.413654    | 0.477578  | 0.77269  |
| Zmym3_j8         | 0.464637  | 1.10951   | 0           | 1         | 1        |
| Zmym3_j7         | 0.221289  | 0.456717  | 0           | 1         | 1        |
| Zmym3_j4         | 5.63853   | 3.88778   | 0           | 1         | 1        |
| Zmym3_j6         | 0.4649    | 0.32994   | 0           | 1         | 1        |
| Rps4x_j3         | 20.8104   | 23.9016   | 0.199808    | 0.114969  | 0.421857 |
| Cited1           | 1.42742   | 1.12734   | -0.340494   | 0.36844   | 0.701715 |
| Phka1_j1         | 0.612693  | 0.240853  | 0           | 1         | 1        |
| B230206F22Rik_j2 | 0.0375111 | 0.144131  | 1.94199     | 0.181978  | 1        |
| C77370_j4        | 0.0142401 | 0.185619  | 3.70432     | 0.0418929 | 0.231058 |
| Abcb7_j1         | 0.0806595 | 0.131544  | 0           | 1         | 1        |
| Atrx_j2          | 0.0494135 | 0         | 0           | 1         | 1        |
| Rps6ka6_j3       | 0.237627  | 0.393163  | 0.726425    | 0.0851322 | 0.356148 |
| Rps6ka6_j5       | 0.976561  | 0.782598  | -0.319439   | 0.215838  | 0.561549 |
| Tspan6_j1        | 0.234686  | 0.251095  | 0.0975036   | 0.898484  | 0.967622 |
| Trmt2b_j1        | 0.0829737 | 0.143758  | 0.79292     | 0.300956  | 1        |
| Timm8a1_j1       | 10.5055   | 12.2399   | 0.22045     | 0.116175  | 0.424212 |
| Tceal5           | 2.65345   | 2.46793   | 0           | 1         | 1        |
| Morf4l2_j1       | 0.339298  | 19.3397   | 0           | 1         | 1        |
| Mcart6           | 0.50354   | 0.68045   | 0           | 1         | 1        |
| Mcart6           | 0.0316557 | 0.0516154 | 0           | 1         | 1        |
| Gm15013          | 2.43662   | 3.01907   | 0.30922     | 0.178604  | 0.518168 |
| Rbm41            | 0.228915  | 0.199937  | -0.195267   | 0.734014  | 0.90626  |
| Tsc22d3_j1       | 3.87339   | 4.34346   | 0           | 1         | 1        |
| Acsl4_j1         | 8.48045   | 11.1497   | 0           | 1         | 1        |
| Capn6_j1         | 0.255063  | 0.315942  | 0.308807    | 0.528675  | 0.802224 |
| Amot_j4          | 1.42535   | 1.40359   | -0.0221955  | 0.908981  | 0.971253 |
| Lrch2_j8         | 0.131051  | 0.0563265 | 0           | 1         | 1        |
| Tmem29_j1        | 3.76414   | 4.4316    | 0.235505    | 0.33576   | 0.676402 |
| XLOC_036850      | 0.386029  | 0.386005  | -9.24E-05   | 0.999868  | 0.999918 |
| XLOC_036850      | 0.0278107 | 0.132773  | 2.25524     | 0.238195  | 1        |
| Apex2            | 1.64839   | 1.64514   | -0.00284881 | 0.988683  | 0.996605 |
| Tro_j4           | 1.31246   | 0.50928   | 0           | 1         | 1        |
| Gnl3l_j2         | 0.316291  | 0         | 0           | 1         | 1        |
| Shroom2_j1       | 0.532965  | 0.709731  | 0           | 1         | 1        |
| Sat1_j3          | 1.90221   | 1.61723   | 0           | 1         | 1        |
| Sat1_j2          | 0.406543  | 0.119346  | 0           | 1         | 1        |
| Sat1_j4          | 1.18659   | 1.12289   | 0           | 1         | 1        |
| Prdx4_j1         | 15.2267   | 16.2269   | 0.0917903   | 0.587604  | 0.83506  |
| Sms_j1           | 34.3397   | 33.1107   | -0.0525784  | 0.568551  | 0.825633 |

|             |           |                 |            |           |           |
|-------------|-----------|-----------------|------------|-----------|-----------|
| Mbtps2_j1   | 1.30908   | 1.01578         | 0          | 1         | 1         |
| Ppef1_j1    | 0         | 3.192           | 0          | 1         | 1         |
| Nhs_j4      | 0.0543592 | 0 -1.79769e+308 | 0.0662536  |           | 1         |
| Syap1_j1    | 6.60409   | 5.50164         | -0.263497  | 0.170828  | 0.507711  |
| Zrsr2_j1    | 2.10447   | 2.58323         | 0.295715   | 0.157451  | 0.49157   |
| Car5b_j1    | 0.981872  | 0.791561        | -0.310835  | 0.302072  | 0.648243  |
| Bmx_j3      | 0.163123  | 0.133059        | -0.293894  | 0.69729   | 0.888552  |
| Mospd2      | 1.57488   | 0.907551        | 0          | 1         | 1         |
| Tceanc_j2   | 0.166162  | 0.171905        | 0.0490233  | 0.933909  | 0.979958  |
| Msl3_j7     | 0.378851  | 0.127087        | -1.57582   | 0.0230727 | 0.155463  |
| Msl3_j1     | 2.40176   | 2.45247         | 0.0301404  | 0.851608  | 0.952877  |
| Hccs        | 0.499906  | 0.578677        | 0.211101   | 0.596275  | 0.83935   |
| Prickle3    | 0.58802   | 0.530388        | -0.148817  | 0.614275  | 0.847685  |
| Prickle3_j1 | 0.0512231 | 0.052643        | 0.0394475  | 0.967597  | 1         |
| Gpkow_j2    | 0.105808  | 0 -1.79769e+308 | 0.0012482  |           | 1         |
| Praf2_j2    | 13.4774   | 18.3803         | 0.447615   | 0.0111248 | 0.092746  |
| Tfe3        | 0.233693  | 0.28662         | 0          | 1         | 1         |
| Tcfe3       | 6.42655   | 5.42134         | 0          | 1         | 1         |
| Gripap1_j2  | 4.42804   | 5.477           | 0          | 1         | 1         |
| Kcnd1_j7    | 13.0733   | 10.9717         | 0          | 1         | 1         |
| Pcsk1n_j1   | 54.2982   | 44.1738         | -0.297715  | 0.034977  | 0.205583  |
| Lanc13_j2   | 0.75782   | 0.143127        | -2.40456   | 7.98E-05  | 0.0017722 |
| Mid1ip1_j1  | 11.6245   | 11.1151         | 0          | 1         | 1         |
| AK036020_j2 | 0.0734932 | 0.0667699       | -0.138414  | 0.936078  | 1         |
| AK036020_j7 | 0.103495  | 0.051401        | -1.00969   | 0.533286  | 1         |
| AK036020_j8 | 0.063761  | 0 -1.79769e+308 | 0.0614968  |           | 1         |
| Usp9x_j5    | 0.402277  | 0.180528        | 0          | 1         | 1         |
| Usp9x_j13   | 15.9172   | 15.3975         | -0.0478916 | 0.611121  | 0.846733  |
| Usp9x_j14   | 13.4054   | 12.7174         | -0.0760104 | 0.399892  | 0.723377  |
| Ddx3x_j2    | 0.237875  | 0.266032        | 0.1614     | 0.79464   | 0.931482  |
| Kdm6a_j9    | 0.427527  | 0.419808        | -0.0262884 | 0.966514  | 0.990403  |
| Uba1_j4     | 1.48132   | 0.00743207      | 0          | 1         | 1         |
| Slc25a43_j2 | 0.076368  | 0.0244147       | -1.64522   | 0.156116  | 1         |
| Ankrd58     | 0.171316  | 0.0874741       | -0.969729  | 0.308793  | 0.653685  |
| Mcts1_j3    | 16.2556   | 16.7805         | 0          | 1         | 1         |
| Gria3_j3    | 0.789793  | 0.585476        | -0.431865  | 0.113743  | 0.419374  |
| Gria3_j5    | 0.270304  | 0.234373        | -0.20578   | 0.638179  | 0.859943  |
| Gria3_j8    | 0.207907  | 0.0593718       | -1.80809   | 0.0589302 | 0.28542   |
| Xiap_j3     | 8.78681   | 7.51362         | 0          | 1         | 1         |
| Xiap        | 1.57599   | 1.5507          | 0          | 1         | 1         |
| Ocr1_j4     | 0.15989   | 0 -1.79769e+308 | 0.0005654  | 0.0090306 |           |
| Xpnpep2_j1  | 0.0683311 | 0 -1.79769e+308 | 0.024999   |           | 1         |
| Xpnpep2_j4  | 0.0733775 | 0.0239245       | -1.61685   | 0.465803  | 1         |
| Sash3_j2    | 0.135652  | 0.0476148       | -1.51043   | 0.202848  | 1         |
| Bcor11      | 0.0475327 | 0.0414766       | -0.196622  | 0.803235  | 1         |
| Slc25a14    | 0.706846  | 0.0479343       | 0          | 1         | 1         |
| Slc25a14_j8 | 2.27889   | 1.97215         | 0          | 1         | 1         |

|                  |           |           |               |           |          |
|------------------|-----------|-----------|---------------|-----------|----------|
| Slc25a14         | 0.731098  | 0         | 0             | 1         | 1        |
| Slc25a14_j7      | 0         | 0.0740269 | 0             | 1         | 1        |
| Arhgap36_j3      | 2.69281   | 0.567194  | 0             | 1         | 1        |
| XLOC_036258      | 0.134405  | 0.11507   | 0             | 1         | 1        |
| Ccdc160_j1       | 1.27207   | 0.602543  | -1.07804      | 0.013465  | 0.106602 |
| 4930502E18Rik    | 0.62422   | 0.134648  | -2.21287      | 0.0172649 | 0.127123 |
| 4930502E18Rik_j2 | 0.0665131 | 0.0250856 | -1.40678      | 0.473348  | 1        |
| Ddx26b_j6        | 1.90318   | 1.56812   | 0             | 1         | 1        |
| Ddx26b_j5        | 0.049983  | 0         | 0             | 1         | 1        |
| Ddx26b_j10       | 0.0766047 | 0.0638846 | 0             | 1         | 1        |
| Slc9a6_j4        | 0.156134  | 0         | 0             | 1         | 1        |
| Fhl1             | 0.802758  | 0.0107331 | 0             | 1         | 1        |
| F9_j1            | 0.12076   | 0         | -1.79769e+308 | 0.0017247 | 1        |
| C230004F18Rik_j1 | 0.477364  | 0.632699  | 0.406428      | 0.0578597 | 0.282283 |
| Slitrk2_j1       | 0.205067  | 0.0235577 | 0             | 1         | 1        |
| Fmr1_j6          | 0.050388  | 0         | 0             | 1         | 1        |
| Aff2_j3          | 0.324972  | 0         | -1.79769e+308 | 8.38E-17  | 2.14E-14 |
| Mtm1_j1          | 1.71824   | 1.8306    | 0.0913872     | 0.755888  | 0.915824 |
| Mtmr1_j5         | 0.334041  | 0.311159  | 0             | 1         | 1        |
| Vma21_j2         | 0.758981  | 1.30329   | 0             | 1         | 1        |
| Atp2b3           | 2.05837   | 0.944895  | -1.12328      | 2.19E-08  | 1.42E-06 |
| Atp2b3_j9        | 0.128674  | 0         | -1.79769e+308 | 0.0001752 | 1        |
| Plxnb3_j8        | 1.15432   | 1.19017   | 0             | 1         | 1        |
| Atp6ap1_j1       | 1.50243   | 1.30385   | 0             | 1         | 1        |
| Gdi1_j2          | 38.4858   | 33.8753   | 0             | 1         | 1        |
| Plxna3_j2        | 0.507256  | 0.543857  | 0             | 1         | 1        |
| Plxna3_j6        | 0.297421  | 0.274156  | 0             | 1         | 1        |
| Plxna3_j7        | 0.22588   | 0.332324  | 0             | 1         | 1        |
| Ikbkg_j4         | 0.43404   | 0.490812  | 0             | 1         | 1        |
| XLOC_036326      | 0.112891  | 0.0478559 | -1.23817      | 0.406444  | 1        |
| Brcc3_j2         | 0.122317  | 0.223209  | 0.867769      | 0.0299356 | 0.185519 |
| Tbl1x_j2         | 7.57562   | 6.6325    | 0             | 1         | 1        |
| Dmd_j1           | 0.0862845 | 0.0252712 | -1.7716       | 0.526635  | 1        |
| Dmd_j15          | 3.00234   | 3.45997   | 0             | 1         | 1        |
| Tab3_j3          | 0.887584  | 0.773319  | 0             | 1         | 1        |
| 5430427019Rik_j1 | 0.210844  | 0.191677  | -0.1375       | 0.834339  | 0.946759 |
| Klhl15_j2        | 0.180039  | 0.150836  | -0.255326     | 0.622376  | 0.852322 |
| Klhl15_j1        | 0.105946  | 0.0909439 | -0.220278     | 0.738061  | 1        |
| XLOC_036353      | 0.0991135 | 0.0677389 | -0.549096     | 0.630073  | 1        |
| Gm14827_j2       | 0.241549  | 0.120716  | -1.0007       | 0.0184162 | 0.133186 |
| AK050859_j1      | 0.839751  | 0.866797  | 0             | 1         | 1        |
| Zc3h12b          | 0.293075  | 0.193782  | -0.596833     | 0.0541626 | 0.271281 |
| Heph_j1          | 0.122735  | 0.0782452 | -0.649479     | 0.415516  | 1        |
| Stard8_j6        | 0.583819  | 0.389385  | 0             | 1         | 1        |
| Eda_j2           | 0.132233  | 2.28E-05  | 0             | 1         | 1        |
| Gdpd2_j2         | 0.628283  | 0.478363  | -0.393307     | 0.305314  | 0.650417 |
| Gdpd2_j1         | 0.378009  | 0.192354  | -0.974657     | 0.113652  | 0.419374 |

|                  |             |                 |           |           |           |
|------------------|-------------|-----------------|-----------|-----------|-----------|
| Dlg3_j1          | 0.286896    | 0.251743        | 0         | 1         | 1         |
| Med12_j4         | 0.0729393   | 0.0228863       | 0         | 1         | 1         |
| Med12_j5         | 0.983469    | 0.82853         | 0         | 1         | 1         |
| Med12_j11        | 0.449408    | 0.895682        | 0         | 1         | 1         |
| Nono_j2          | 9.64894     | 12.5303         | 0.376975  | 0.118533  | 0.428543  |
| Nono_j6          | 9.62925     | 17.909          | 0.89519   | 4.46E-12  | 5.76E-10  |
| Nono_j7          | 30.0524     | 26.2594         | -0.194648 | 0.0881666 | 0.363523  |
| Taf1_j2          | 3.30143     | 2.43413         | 0         | 1         | 1         |
| Ogt_j1           | 1.18766     | 0.200713        | -2.56491  | 1.67E-11  | 1.95E-09  |
| Pin4_j1          | 0.102327    | 0.148479        | 0.537076  | 0.794485  | 1         |
| 2610029G23Rik    | 0.616583    | 0.176008        | -1.80865  | 0.0674325 | 0.310637  |
| 2610029G23Rik_j6 | 3.71213     | 4.23523         | 0.190194  | 0.464554  | 0.764829  |
| 2610029G23Rik_j5 | 1.39737     | 1.86812         | 0.418871  | 0.25831   | 0.606992  |
| Pgk1_j1          | 57.0682     | 73.1383         | 0         | 1         | 1         |
| Sh3bgrl_j1       | 12.101      | 18.0079         | 0         | 1         | 1         |
| Sh3bgrl_j4       | 5.90281     | 4.35086         | 0         | 1         | 1         |
| Zfp711_j1        | 0.278666    | 0.187356        | -0.572758 | 0.220771  | 0.567642  |
| Zfp711           | 0.279944    | 0.00530531      | -5.72156  | 0.0354355 | 0.207411  |
| Zfp711_j4        | 0.0818829   | 1.32E-05        | -12.5971  | 0.977559  | 1         |
| Pabpc5           | 0.0760817   | 0.105027        | 0.465146  | 0.622627  | 1         |
| Pcdh11x_j3       | 0.143434    | 0.0528048       | -1.44164  | 0.054832  | 0.273143  |
| Pcdh11x_j1       | 0.000140963 | 0.0536665       | 8.57256   | 0.764557  | 1         |
| 3110007F17Rik    | 1.06558     | 1.04025         | -0.03471  | 0.888513  | 0.964658  |
| 3110007F17Rik_j1 | 0.324084    | 0.130758        | -1.30947  | 0.0591069 | 0.285679  |
| Diap2_j5         | 0.398613    | 0.295296        | -0.432827 | 0.166186  | 0.502787  |
| Diap2_j3         | 0.307758    | 0.345898        | 0.168548  | 0.578762  | 0.830487  |
| Srpx2            | 0.451449    | 0.793963        | 0.814508  | 0.005021  | 0.0508988 |
| Tmem35_j1        | 0.493727    | 0               | 0         | 1         | 1         |
| Drp2_j2          | 0.0983142   | 0               | 0         | 1         | 1         |
| Drp2_j1          | 0.0486837   | 0.015549        | 0         | 1         | 1         |
| Drp2_j7          | 0.0578425   | 0.0464112       | 0         | 1         | 1         |
| Armcx1           | 2.42724     | 2.26013         | 0         | 1         | 1         |
| Armcx1_j1        | 0.41281     | 0.410403        | 0         | 1         | 1         |
| Armcx3_j1        | 2.03783     | 1.8306          | 0         | 1         | 1         |
| XLOC_036434      | 0.293736    | 0.166274        | -0.820958 | 0.334024  | 0.674869  |
| XLOC_036434      | 0.160499    | 0.0738304       | -1.12027  | 0.241034  | 0.588208  |
| Gprasp1_j4       | 9.42176     | 7.51539         | -0.326148 | 0.0023776 | 0.0286843 |
| Ngfrap1          | 55.892      | 62.0774         | 0         | 1         | 1         |
| Ngfrap1          | 9.82077     | 8.08867         | 0         | 1         | 1         |
| BC065397_j1      | 0.331548    | 0.199376        | 0         | 1         | 1         |
| BC065397_j4      | 0.0803898   | 0.0190941       | 0         | 1         | 1         |
| BC065397_j5      | 0.096898    | 0.0293413       | 0         | 1         | 1         |
| Tbc1d8b_j4       | 0.0999411   | 0 -1.79769e+308 |           | 6.14E-05  | 1         |
| Prps1            | 1.94461     | 2.4409          | 0.327933  | 0.205745  | 0.550218  |
| Mid2_j1          | 1.52111     | 0.999281        | 0         | 1         | 1         |
| Atg4a_j3         | 2.33557     | 2.66098         | 0.18818   | 0.300686  | 0.647265  |
| Col4a5_j3        | 0.12951     | 0.0472736       | -1.45396  | 0.385484  | 1         |

|                  |           |           |               |           |           |
|------------------|-----------|-----------|---------------|-----------|-----------|
| Col4a5_j5        | 0.052299  | 0         | -1.79769e+308 | 0.006464  | 1         |
| Col4a5_j4        | 0.163814  | 0.10018   | -0.709457     | 0.254455  | 0.602729  |
| Tmem164_j3       | 0.167783  | 0         | 0             | 1         | 1         |
| Tmem164_j9       | 3.93591   | 5.90488   | 0             | 1         | 1         |
| Pak3_j4          | 0.404893  | 0.140518  | 0             | 1         | 1         |
| Pak3_j7          | 0.401366  | 0.169067  | 0             | 1         | 1         |
| Alg13_j3         | 0.196086  | 0.0693571 | -1.49937      | 0.0674121 | 0.310572  |
| Alas2            | 0.35358   | 0.222629  | -0.667392     | 0.304441  | 0.650023  |
| Alas2_j2         | 0.169815  | 0.290589  | 0.775018      | 0.239223  | 0.586462  |
| Alas2_j1         | 0.263181  | 0.386951  | 0.556096      | 0.308604  | 0.653511  |
| Fgd1_j1          | 2.1438    | 1.72155   | 0             | 1         | 1         |
| Wnk3_j1          | 0.226868  | 0.0334851 | -2.76026      | 0.0005465 | 0.0087921 |
| Phf8_j1          | 0.434887  | 0.283442  | -0.61759      | 0.0840306 | 0.353682  |
| Phf8_j5          | 0.492308  | 0         | -1.79769e+308 | 2.46E-16  | 5.91E-14  |
| Huwe1_j8         | 0.449851  | 0.388236  | 0             | 1         | 1         |
| Huwe1_j7         | 0.133774  | 0.0915661 | 0             | 1         | 1         |
| Huwe1_j11        | 0.0471676 | 0         | 0             | 1         | 1         |
| Smc1a_j1         | 12.9533   | 16.1556   | 0             | 1         | 1         |
| lqsec2_j1        | 10.995    | 8.73056   | 0             | 1         | 1         |
| lqsec2_j6        | 0.398831  | 0         | 0             | 1         | 1         |
| lqsec2_j2        | 0.389546  | 0.269756  | 0             | 1         | 1         |
| Kdm5c_j3         | 1.00294   | 0.689322  | 0             | 1         | 1         |
| AK013876_j3      | 0.547292  | 0.324564  | -0.753806     | 0.0078372 | 0.0714764 |
| Rragb_j3         | 0.230048  | 0.774203  | 0             | 1         | 1         |
| 2210013021Rik_j1 | 16.1619   | 19.0398   | 0.236417      | 0.155009  | 0.488311  |
| XLOC_036493      | 0.226435  | 0.182136  | -0.314079     | 0.322333  | 0.665296  |
| Rps6ka3_j3       | 0.832847  | 0         | 0             | 1         | 1         |
| Mtap7d2_j3       | 0.295155  | 0.332411  | 0             | 1         | 1         |
| Mtap7d2_j8       | 6.06108   | 4.31158   | 0             | 1         | 1         |
| Sh3kbp1_j1       | 0.0668306 | 0.156911  | 0             | 1         | 1         |
| Sh3kbp1_j2       | 0.850187  | 0.338794  | 0             | 1         | 1         |
| Map3k15_j1       | 0.159873  | 0         | -1.79769e+308 | 0.0061476 | 0.059693  |
| Gpr64            | 1.09964   | 0.71557   | 0             | 1         | 1         |
| Gpr64_j1         | 0.542858  | 0.346517  | 0             | 1         | 1         |
| XLOC_036510      | 0.286448  | 0.269641  | 0             | 1         | 1         |
| Scml2_j3         | 0.067078  | 0.0819232 | 0.288433      | 0.782246  | 1         |
| Ap1s2_j5         | 1.94704   | 2.207     | 0.180805      | 0.656285  | 0.86886   |
| Ap1s2_j6         | 7.67378   | 7.546     | -0.0242241    | 0.899086  | 0.96767   |
| Ace2_j4          | 0.238061  | 0.0846282 | -1.49212      | 0.232873  | 0.580117  |
| Piga             | 0.586712  | 0.635411  | 0.115038      | 0.693614  | 0.886836  |
| Piga             | 0.270739  | 0.124377  | -1.12218      | 0.10117   | 0.393827  |
| Fancb_j1         | 0.0969909 | 0.203304  | 1.06772       | 0.136915  | 0.460113  |
| Fancb_j7         | 0.562321  | 0.241931  | -1.2168       | 0.0993582 | 0.39017   |
| Gemin8_j1        | 0.823763  | 0.910589  | 0.144571      | 0.648822  | 0.864842  |
| Gpm6b            | 11.7457   | 12.0829   | 0             | 1         | 1         |
| Gpm6b            | 14.3438   | 13.4911   | 0             | 1         | 1         |
| Arhgap6_j1       | 0.0597957 | 0.114695  | 0.939693      | 0.252393  | 1         |

|                  |           |                 |           |           |           |
|------------------|-----------|-----------------|-----------|-----------|-----------|
| AK051847_j2      | 0.0513618 | 0.0833115       | 0.697821  | 0.583245  | 1         |
| AK051847_j5      | 1.21585   | 0.978079        | -0.313937 | 0.239485  | 0.586869  |
| Ccdc22_j3        | 0.0204783 | 0.100171        | 2.29029   | 0.0425305 | 1         |
| Plp2_j4          | 0.191585  | 0 -1.79769e+308 |           | 0.0025615 | 0.0304205 |
| Pdzx             | 0.297748  | 0.111566        | -1.41619  | 0.031117  | 0.190203  |
| Ccdc120_j1       | 0.726512  | 0.988679        | 0.444516  | 0.142858  | 0.469774  |
| Hdac6            | 2.5708    | 2.80818         | 0         | 1         | 1         |
| Wdr13_j4         | 0.0604742 | 0               | 0         | 1         | 1         |
| Rbm3_j1          | 4.83228   | 5.16443         | 0.0959047 | 0.562777  | 0.822297  |
| Tbc1d25_j2       | 3.95949   | 4.4597          | 0         | 1         | 1         |
| XLOC_036574      | 0.0507309 | 0.041121        | -0.30299  | 0.853616  | 1         |
| Bcor             | 5.07E-05  | 0.113329        | 0         | 1         | 1         |
| mKIAA1575_j2     | 0.122377  | 0.0647639       | 0         | 1         | 1         |
| mKIAA1575_j1     | 3.297     | 2.29752         | 0         | 1         | 1         |
| Med14            | 0.85039   | 0.3414          | -1.31666  | 0.0001647 | 0.0032628 |
| Cask_j1          | 0.144807  | 0               | 0         | 1         | 1         |
| Cask_j5          | 0.422347  | 0.302381        | 0         | 1         | 1         |
| Efhc2_j3         | 0.468063  | 0.182055        | -1.36233  | 0.0291229 | 0.18201   |
| 4930578C19Rik_j3 | 0.0925295 | 0.058561        | -0.659974 | 0.608136  | 1         |
| Syn1_j5          | 49.6368   | 36.9437         | 0         | 1         | 1         |
| Syn1             | 58.7975   | 50.173          | 0         | 1         | 1         |
| Zfp182_j1        | 0.478759  | 0.25102         | 0         | 1         | 1         |
| Akap17b_j3       | 0.147285  | 0.194773        | 0         | 1         | 1         |
| Sept6_j1         | 16.1083   | 11.6031         | -0.473299 | 0.0033423 | 0.0375262 |
| Sept6_j1         | 0.618036  | 0.481257        | -0.360884 | 0.369613  | 0.703028  |
| Sept6            | 4.01514   | 2.64846         | -0.600298 | 0.0143695 | 0.111552  |
| Rpl39            | 4.80648   | 4.88753         | 0.0241265 | 0.932169  | 0.979434  |
| Upf3b_j3         | 1.61733   | 1.61942         | 0.0018617 | 0.9944    | 0.998387  |
| Cul4b_j4         | 1.19284   | 1.97252         | 0         | 1         | 1         |
| Odz1_j2          | 0.179066  | 0.129779        | 0         | 1         | 1         |
| Odz1_j5          | 0.0626584 | 0.0440451       | 0         | 1         | 1         |
| Odz1_j4          | 0.0726756 | 0               | 0         | 1         | 1         |
| Smarca1          | 0.817443  | 0               | 0         | 1         | 1         |
| Apln             | 0.215483  | 0.0505043       | -2.0931   | 0.0467334 | 0.247961  |
| Apln_j2          | 0.0778905 | 0.0757461       | -0.040277 | 0.967184  | 1         |
| Zfp280c_j4       | 0.169734  | 0 -1.79769e+308 |           | 2.60E-05  | 0.000688  |
| Zfp280c_j7       | 0.439164  | 0.309682        | -0.503972 | 0.229945  | 0.577072  |
| Enox2_j3         | 0.976553  | 1.19832         | 0         | 1         | 1         |
| AK039500_j1      | 0.273427  | 0 -1.79769e+308 |           | 0.013082  | 0.104555  |
| 6720401G13Rik_j7 | 0.75826   | 0.251599        | 0         | 1         | 1         |
| Frmf7_j2         | 0.134776  | 0.0852078       | -0.661501 | 0.277944  | 1         |
| Hs6st2_j3        | 0.256127  | 0.251916        | 0         | 1         | 1         |
| Fam122b_j3       | 0.195514  | 0.130845        | -0.579413 | 0.430169  | 0.743027  |
| Mtap7d3_j1       | 0.0824594 | 0.0611047       | -0.432401 | 0.762939  | 1         |
| Arhgef6_j1       | 0.839782  | 0.566763        | 0         | 1         | 1         |
| Arhgef6_j3       | 0.176662  | 0.0270054       | 0         | 1         | 1         |
| Arhgef6_j4       | 0.0867336 | 0.0396381       | 0         | 1         | 1         |



|                  |           |                 |            |           |           |
|------------------|-----------|-----------------|------------|-----------|-----------|
| Rbmx_j1          | 0.102941  | 0.154052        | 0.581596   | 0.156622  | 1         |
| Slitrk4_j1       | 0.363375  | 0.287177        | 0          | 1         | 1         |
| Gm5391           | 13.5117   | 16.0696         | 0.250126   | 0.123702  | 0.438136  |
| Ids_j3           | 0.488648  | 0.268424        | 0          | 1         | 1         |
| Cd99l2_j4        | 0.538665  | 2.21233         | 0          | 1         | 1         |
| Cd99l2_j5        | 21.9963   | 17.1516         | 0          | 1         | 1         |
| Xlr4c_j4         | 0.0839268 | 0 -1.79769e+308 |            | 0.161479  | 1         |
| Pdzd4_j4         | 9.93931   | 10.8784         | 0.130244   | 0.291043  | 0.638295  |
| Pdzd4_j5         | 2.62416   | 2.48147         | -0.0806589 | 0.701787  | 0.890441  |
| L1cam_j5         | 16.9858   | 17.1881         | 0          | 1         | 1         |
| L1cam_j6         | 58.859    | 55.8187         | 0          | 1         | 1         |
| Naa10_j6         | 0.680929  | 0.138671        | -2.29583   | 0.0842177 | 0.354146  |
| Hcfc1_j2         | 0.259074  | 0 -1.79769e+308 |            | 1.45E-12  | 2.02E-10  |
| Lage3_j2         | 1.00961   | 0.821918        | -0.29673   | 0.60844   | 0.845752  |
| Gab3             | 0.15335   | 0.172991        | 0.173867   | 0.803473  | 0.93476   |
| Gab3_j4          | 0.144512  | 0 -1.79769e+308 |            | 0.0086643 | 0.0770163 |
| 4933407K13Rik_j1 | 0.250584  | 0.262247        | 0.0656324  | 0.831065  | 0.945521  |
| Prkx_j2          | 14.0458   | 16.3385         | 0          | 1         | 1         |
| Prrg1_j2         | 0.145209  | 0 -1.79769e+308 |            | 0.0002607 | 0.0047743 |
| Prrg1_j3         | 0.169567  | 0 -1.79769e+308 |            | 6.89E-05  | 0.0015676 |
| Gm16462_j1       | 0.107259  | 0.0645209       | -0.733255  | 0.396401  | 1         |
| Il1rapl1_j1      | 0.125375  | 0.152406        | 0.281667   | 0.819542  | 1         |
| Pola1_j6         | 0.25589   | 0.000334871     | -9.5777    | 0.883285  | 0.962963  |
| Pdk3_j1          | 5.60338   | 4.51893         | 0          | 1         | 1         |
| Zfx_j1           | 1.35459   | 0.899625        | 0          | 1         | 1         |
| Arhgef9_j5       | 0.158478  | 0               | 0          | 1         | 1         |
| Ophn1_j3         | 3.29283   | 3.56138         | 0          | 1         | 1         |
| Slc7a3_j3        | 0.131782  | 0.070427        | -0.903952  | 0.397102  | 1         |
| Zmym3_j10        | 0.266235  | 0               | 0          | 1         | 1         |
| Phka1_j2         | 0.581506  | 0.343395        | 0          | 1         | 1         |
| Dmrtc1a_j1       | 0.200965  | 0.266566        | 0.407548   | 0.601085  | 0.841992  |
| XLOC_036762      | 0.0629371 | 0 -1.79769e+308 |            | 0.0498379 | 1         |
| B230206F22Rik_j4 | 0.224837  | 0.110013        | -1.0312    | 0.119038  | 0.429231  |
| Rlim_j1          | 0.558114  | 2.56473         | 0          | 1         | 1         |
| C77370           | 0.0942068 | 0.0361642       | -1.38127   | 0.450859  | 1         |
| Zdhhc15_j2       | 0.239515  | 0               | 0          | 1         | 1         |
| 5530601H04Rik_j2 | 0.119491  | 0 -1.79769e+308 |            | 0.0079053 | 1         |
| Atrx_j12         | 2.55888   | 2.89964         | 0          | 1         | 1         |
| Atrx_j13         | 0.319128  | 0.273894        | 0          | 1         | 1         |
| Atrx_j14         | 0.150541  | 0.00182528      | 0          | 1         | 1         |
| Atrx_j15         | 0.382121  | 0.193726        | 0          | 1         | 1         |
| Taf9b_j2         | 6.98558   | 6.75518         | 0          | 1         | 1         |
| Brwd3_j7         | 0.0840009 | 0 -1.79769e+308 |            | 0.0712396 | 1         |
| Rps6ka6_j4       | 0.470204  | 0.271707        | -0.791236  | 0.0623453 | 0.295582  |
| Hdx_j2           | 0.0713994 | 0 -1.79769e+308 |            | 0.123055  | 1         |
| Chm_j4           | 0.112176  | 0               | 0          | 1         | 1         |
| Xkrx_j1          | 0.119705  | 0 -1.79769e+308 |            | 0.010646  | 1         |

|               |           |                       |            |           |           |
|---------------|-----------|-----------------------|------------|-----------|-----------|
| Armcx2        | 14.374    | 8.04187               | 0          | 1         | 1         |
| Morf4l2       | 44.1776   | 36.5044               | 0          | 1         | 1         |
| Acsl4         | 0.599604  | 0.9397                | 0          | 1         | 1         |
| Capn6_j3      | 0.0773746 | 0 -1.79769e+308       | 0.0035575  |           | 1         |
| Capn6_j2      | 0.113129  | 0.0113936             | -3.31168   | 0.0947818 | 1         |
| Lhfp1_j3      | 6.22106   | 4.19733               | 0          | 1         | 1         |
| Lrch2_j2      | 0.127844  | 0.434908              | 0          | 1         | 1         |
| Lrch2_j1      | 0.241467  | 0.332116              | 0          | 1         | 1         |
| Tro           | 10.7957   | 9.09331               | 0          | 1         | 1         |
| Ribc1         | 0.287663  | 0.233616              | -0.300244  | 0.413798  | 0.732563  |
| 2900056M20Rik | 0.398195  | 0.279926              | 0          | 1         | 1         |
| Gpr173_j7     | 0.500969  | 0.427909              | -0.227417  | 0.485552  | 0.777115  |
| Shroom2_j4    | 0.634413  | 4.95E-05              | 0          | 1         | 1         |
| Sms_j4        | 0.167393  | 0.128102              | -0.38595   | 0.581292  | 0.832206  |
| Mbtps2_j5     | 0.205503  | 0                     | 0          | 1         | 1         |
| Cnksr2_j2     | 0         | 0.456933              | 0          | 1         | 1         |
| Cnksr2        | 0.303549  | 1.04651               | 0          | 1         | 1         |
| Ppef1_j4      | 8.48921   | 7.86133               | 0          | 1         | 1         |
| Nhs_j2        | 0.107177  | 0.0409289             | -1.3888    | 0.0575342 | 1         |
| Reps2_j1      | 7.6976    | 6.57309               | 0          | 1         | 1         |
| XLOC_036888   | 0.100515  | 0.0707684             | -0.506234  | 0.525357  | 1         |
| Zrsr2         | 7.43944   | 7.3053                | -0.0262497 | 0.812724  | 0.938836  |
| Bmx_j4        | 0.0523052 | 0 -1.79769e+308       | 0.0214495  |           | 1         |
| Rab9_j1       | 2.01831   | 3.93757               | 0.964156   | 0.000706  | 0.0107986 |
| Tceanc_j1     | 0.157823  | 0.0145557             | -3.43865   | 0.020476  | 0.143235  |
| Frmpd4_j4     | 0.78405   | 0.3071                | -1.35224   | 7.70E-07  | 3.31E-05  |
| Frmpd4_j10    | 0.19021   | 0 -1.79769e+308       | 0.142306   |           | 0.468953  |
| Syp_j1        | 4.66234   | 3.66981               | -0.34535   | 0.157759  | 0.49191   |
| Gpkow_j3      | 1.21509   | 1.32879               | 0.129047   | 0.64459   | 0.862979  |
| Wdr45         | 3.09021   | 3.03486               | -0.0260747 | 0.914302  | 0.973198  |
| Wdr45_j1      | 0.189001  | 0.131427              | -0.524131  | 0.598265  | 0.840673  |
| Wdr45_j4      | 3.83146   | 4.92999               | 0.363689   | 0.0896841 | 0.367369  |
| Praf2         | 25.5437   | 26.5011               | 0.0530839  | 0.647029  | 0.863936  |
| Otud5         | 0.185261  | 0.334686              | 0          | 1         | 1         |
| Otud5         | 9.21149   | 10.0872               | 0          | 1         | 1         |
| Slc35a2       | 3.47445   | 4.51941               | 0.379349   | 0.0663601 | 0.307724  |
| Slc35a2_j1    | 4.355     | 4.52635               | 0.0556746  | 0.796274  | 0.932066  |
| Tspan7_j2     | 0         | 1.13034 1.79769e+308  | 0.0002807  |           | 0.0050648 |
| AK036020_j1   | 0.18537   | 0.107465              | -0.786541  | 0.418508  | 0.735325  |
| Usp9x_j6      | 2.53477   | 3.13791               | 0          | 1         | 1         |
| Usp9x_j9      | 0.184477  | 0.189745              | 0          | 1         | 1         |
| Ddx3x_j1      | 0.271642  | 0.102295              | -1.40897   | 0.134753  | 0.456922  |
| Gpr34         | 0.192879  | 0                     | 0          | 1         | 1         |
| Kdm6a_j6      | 0         | 0.344297 1.79769e+308 | 1.06E-06   |           | 4.34E-05  |
| Rbm10_j2      | 1.13913   | 1.08623               | -0.068594  | 0.83668   | 0.947734  |
| Uba1_j3       | 1.44833   | 1.19308               | 0          | 1         | 1         |
| Cdk16_j2      | 3.02619   | 4.18288               | 0          | 1         | 1         |

|                   |            |           |              |           |           |
|-------------------|------------|-----------|--------------|-----------|-----------|
| Araf_j2           | 48.4852    | 52.4645   | 0            | 1         | 1         |
| Dock11_j8         | 1.7004     | 1.7988    | 0            | 1         | 1         |
| Dock11_j11        | 3.83705    | 5.21828   | 0            | 1         | 1         |
| Zcchc12           | 0.256903   | 0.349605  | 0            | 1         | 1         |
| Lonrf3_j1         | 0.135194   | 0.17509   | 0.373066     | 0.621267  | 0.851543  |
| Pgrmc1_j1         | 70.3356    | 72.2328   | 0.0383983    | 0.674918  | 0.877505  |
| Nkap_j1           | 0.569951   | 0.810628  | 0.508203     | 0.106736  | 0.405895  |
| Zbtb33            | 0.774912   | 0.918424  | 0            | 1         | 1         |
| Gria3_j2          | 0.0691064  | 0.132549  | 0.939634     | 0.156567  | 1         |
| Ocrl_j3           | 0.77792    | 0.579286  | -0.425345    | 0.159495  | 0.493951  |
| Sash3_j3          | 0          | 0.0882513 | 1.79769e+308 | 0.0426101 | 1         |
| XLOC_036248       | 0.0938473  | 0.130567  | 0.476409     | 0.559323  | 1         |
| Slc25a14_j9       | 4.88024    | 5.58238   | 0            | 1         | 1         |
| Arhgap36_j4       | 0          | 0.232922  | 0            | 1         | 1         |
| Cxx1c_j1          | 0          | 0.0593355 | 0            | 1         | 1         |
| XLOC_036264       | 0.111911   | 0.149546  | 0.418235     | 0.412852  | 1         |
| Ddx26b_j11        | 0.441837   | 0.465125  | 0            | 1         | 1         |
| C230004F18Rik_j11 | 1.80253    | 1.4536    | -0.310391    | 0.0292173 | 0.182366  |
| XLOC_036277       | 0.110077   | 0.0969715 | -0.182878    | 0.845124  | 1         |
| Slitrk2_j2        | 0.040159   | 0.292579  | 0            | 1         | 1         |
| Fmr1_j7           | 1.40658    | 1.36775   | 0            | 1         | 1         |
| Aff2_j4           | 0.823716   | 1.19482   | 0.536573     | 0.0032862 | 0.0370505 |
| Mtm1_j2           | 1.1745     | 1.04617   | -0.166926    | 0.689966  | 0.885202  |
| Mtmr1_j1          | 0.738807   | 0.520871  | 0            | 1         | 1         |
| Mtmr1_j8          | 0.965762   | 0.713257  | 0            | 1         | 1         |
| XLOC_036295       | 0.0741351  | 0.123841  | 0.740263     | 0.503888  | 1         |
| Xlr3b_j2          | 0.244606   | 0.42897   | 0.810417     | 1         | 1         |
| Zfp275_j3         | 0          | 0.263748  | 0            | 1         | 1         |
| Atp2b3_j6         | 0          | 0.259197  | 1.79769e+308 | 0.000157  | 0.003135  |
| Plxnb3_j3         | 0.724921   | 0.413023  | 0            | 1         | 1         |
| Plxnb3_j11        | 0.319315   | 0.449947  | 0            | 1         | 1         |
| Plxnb3_j12        | 0.481002   | 0.540224  | 0            | 1         | 1         |
| Emd_j1            | 4.22245    | 4.80918   | 0.18771      | 0.306358  | 0.651661  |
| Atp6ap1_j2        | 0.0348964  | 0.0616428 | 0            | 1         | 1         |
| Atp6ap1_j3        | 13.9882    | 16.6996   | 0            | 1         | 1         |
| Gdi1_j5           | 64.45      | 68.3863   | 0            | 1         | 1         |
| Plxna3_j1         | 0.0954791  | 0.0839452 | 0            | 1         | 1         |
| Plxna3_j8         | 0.341962   | 0.613868  | 0            | 1         | 1         |
| Ikbkg_j2          | 6.0491     | 5.75948   | 0            | 1         | 1         |
| Brcc3_j4          | 6.69404    | 4.69412   | -0.512023    | 0.0001175 | 0.0024602 |
| Dmd_j2            | 0          | 0.0626796 | 1.79769e+308 | 0.0708041 | 1         |
| Dmd_j12           | 0.617647   | 0.517962  | 0            | 1         | 1         |
| Tab3_j5           | 0.988459   | 0.613921  | 0            | 1         | 1         |
| Tab3_j6           | 0.630157   | 1.08957   | 0            | 1         | 1         |
| Klhl15_j1         | 1.3207     | 1.04554   | -0.337055    | 0.116262  | 0.424314  |
| Apoo_j3           | 0.166331   | 0.113827  | -0.547208    | 0.725268  | 0.902457  |
| XLOC_036353       | 0.00950064 | 0.0901957 | 3.24696      | 0.274293  | 1         |

|                  |           |           |               |           |           |
|------------------|-----------|-----------|---------------|-----------|-----------|
| Gm14827_j3       | 0.0677966 | 0.0818554 | 0.271865      | 0.654587  | 1         |
| Gm14827_j9       | 0.0340891 | 0.143777  | 2.07645       | 0.0457769 | 1         |
| Zc3h12b_j1       | 0.0381116 | 0.120757  | 1.66381       | 0.375884  | 1         |
| Msn_j1           | 75.0174   | 74.3332   | 0             | 1         | 1         |
| Gdpd2_j6         | 0.0578478 | 0.0382429 | -0.59707      | 0.663917  | 1         |
| Gdpd2_j12        | 0.665096  | 0.511896  | -0.377712     | 0.446479  | 0.753343  |
| Dlg3_j4          | 0.0777999 | 0.0325914 | 0             | 1         | 1         |
| Foxo4_j2         | 1.08436   | 1.2679    | 0.225597      | 0.440639  | 0.749739  |
| Med12_j1         | 0.144691  | 0.221662  | 0             | 1         | 1         |
| Med12_j2         | 0.640085  | 0.951766  | 0             | 1         | 1         |
| Med12_j12        | 0.108614  | 0.268961  | 0             | 1         | 1         |
| Med12_j13        | 0.959056  | 1.15876   | 0             | 1         | 1         |
| Nono_j1          | 0.0506014 | 0.0905905 | 0.840184      | 0.483976  | 1         |
| Ogt_j7           | 3.15493   | 4.08727   | 0.373533      | 0.0125112 | 0.101222  |
| Ogt_j8           | 0.111279  | 1.13645   | 3.35228       | 0         | 0         |
| Ogt_j11          | 10.8741   | 11.4308   | 0.0720296     | 0.523935  | 0.799625  |
| Pin4_j3          | 0.483943  | 0.553245  | 0.19308       | 0.7865    | 0.928645  |
| 2010000I03Rik_j2 | 0.0301975 | 0.0626734 | 1.05343       | 0.558613  | 1         |
| 2810403D21Rik_j1 | 0.0650269 | 0.175598  | 1.43317       | 0.361616  | 0.696104  |
| 2810403D21Rik    | 0.371809  | 0.328529  | -0.178541     | 0.8348    | 0.946943  |
| Diap2_j4         | 0         | 0.0994406 | 1.79769e+308  | 0.0004783 | 1         |
| Tmem35_j4        | 17.7531   | 14.4797   | 0             | 1         | 1         |
| Drp2_j3          | 0.199459  | 0.281084  | 0             | 1         | 1         |
| Rpl36a_j3        | 0.0526238 | 0.213377  | 2.01962       | 0.143533  | 0.470705  |
| Gprasp1_j1       | 1.52817   | 1.26133   | -0.276856     | 0.163861  | 0.499391  |
| Tbc1d8b_j2       | 0         | 0.0544272 | 1.79769e+308  | 0.0183752 | 1         |
| Tbc1d8b_j5       | 0.936286  | 0.655911  | -0.513448     | 0.0686999 | 0.314116  |
| Frmpd3_j4        | 0.399285  | 0.920131  | 0             | 1         | 1         |
| XLOC_036451      | 2.48953   | 2.29208   | 0             | 1         | 1         |
| Prps1_j1         | 3.08399   | 2.46373   | -0.323952     | 0.542385  | 0.810216  |
| Mid2_j6          | 0.212316  | 0.715047  | 0             | 1         | 1         |
| Col4a5_j1        | 0.0893011 | 0         | -1.79769e+308 | 0.0040006 | 1         |
| Nxt2             | 0.148614  | 2.66175   | 0             | 1         | 1         |
| Tmem164_j6       | 0.226607  | 0.165042  | 0             | 1         | 1         |
| Tmem164_j8       | 0.152481  | 0.0649917 | 0             | 1         | 1         |
| Pak3_j3          | 0.235187  | 0.440719  | 0             | 1         | 1         |
| Alas2_j5         | 0         | 0.122905  | 1.79769e+308  | 0.0403636 | 1         |
| Pfkfb1_j6        | 0.0735437 | 0.112062  | 0.607617      | 0.605859  | 1         |
| Wnk3_j2          | 0.0672016 | 0.224363  | 1.73927       | 0.0004501 | 0.0074608 |
| Phf8_j6          | 0         | 0.0574099 | 1.79769e+308  | 0.0210035 | 1         |
| Huwe1_j6         | 4.04132   | 3.21296   | 0             | 1         | 1         |
| Huwe1_j12        | 17.7627   | 17.7526   | 0             | 1         | 1         |
| Iqsec2_j2        | 3.17916   | 2.85865   | 0             | 1         | 1         |
| Iqsec2_j7        | 0         | 0.0561224 | 0             | 1         | 1         |
| Kdm5c_j1         | 0         | 0.0959744 | 0             | 1         | 1         |
| AK013876_j1      | 0.184788  | 0.134614  | -0.457043     | 0.413186  | 0.732017  |
| Klf8_j2          | 0.425379  | 0.704154  | 0             | 1         | 1         |

|               |           |           |              |           |           |
|---------------|-----------|-----------|--------------|-----------|-----------|
| Klf8_j4       | 0         | 0.0648944 | 0            | 1         | 1         |
| Klf8_j5       | 0         | 0.121864  | 0            | 1         | 1         |
| Spin2_j3      | 0.0617715 | 0.420207  | 2.76609      | 0.0175192 | 0.128452  |
| Acot9_j2      | 2.46168   | 3.52992   | 0.519993     | 0.14886   | 0.47779   |
| Rps6ka3_j8    | 11.8162   | 9.69892   | 0            | 1         | 1         |
| Mtap7d2       | 14.2371   | 7.71401   | 0            | 1         | 1         |
| Sh3kbp1_j8    | 0.783495  | 1.18647   | 0            | 1         | 1         |
| Sh3kbp1_j10   | 0.105474  | 0.0836016 | 0            | 1         | 1         |
| Gpr64_j2      | 5.80835   | 4.91086   | 0            | 1         | 1         |
| Gpr64_j5      | 0.813751  | 0.489147  | 0            | 1         | 1         |
| Scml2_j4      | 0.0328839 | 0.171334  | 2.38136      | 0.149011  | 0.478021  |
| Rbbp7_j4      | 3.12942   | 3.2308    | 0            | 1         | 1         |
| Ctps2_j1      | 1.81152   | 2.62654   | 0            | 1         | 1         |
| Ctps2_j3      | 9.20966   | 10.3032   | 0            | 1         | 1         |
| Ap1s2_j4      | 0.471646  | 0.655554  | 0.475012     | 0.328636  | 0.671147  |
| Figf_j5       | 0.143408  | 0.0881559 | -0.701992    | 0.622657  | 0.852399  |
| Fancb_j3      | 0.149765  | 0.117749  | -0.346985    | 0.693019  | 0.886263  |
| Fancb_j4      | 0         | 0.0586342 | 1.79769e+308 | 0.0803101 | 1         |
| Mid1          | 0.228307  | 0.420335  | 0.880568     | 0.0405233 | 0.225779  |
| Mid1_j6       | 1.14238   | 0.493799  | -1.21005     | 0.0004114 | 0.0069243 |
| Mid1_j7       | 0         | 0.140806  | 1.79769e+308 | 0.0177392 | 1         |
| Ccdc22_j4     | 2.29238   | 1.94865   | -0.234373    | 0.297857  | 0.644452  |
| Plp2_j3       | 0.0479939 | 0.122599  | 1.35303      | 0.270241  | 1         |
| Plp2_j6       | 0.206215  | 0.698459  | 1.76003      | 0.0539309 | 0.270674  |
| Hdac6_j1      | 3.61522   | 5.68251   | 0            | 1         | 1         |
| Wdr13_j1      | 4.78916   | 5.32616   | 0            | 1         | 1         |
| Wdr13_j2      | 8.51227   | 8.26469   | 0            | 1         | 1         |
| Ftsj1_j2      | 0.828332  | 0.577093  | 0            | 1         | 1         |
| Rpgr_j4       | 0.157532  | 0.163604  | 0.0545653    | 0.938818  | 0.981348  |
| Bcor_j3       | 0.1084    | 0.112381  | 0            | 1         | 1         |
| mKIAA1575_j6  | 0.575028  | 0.506952  | 0            | 1         | 1         |
| Cask_j4       | 0.591528  | 0         | 0            | 1         | 1         |
| Cask_j3       | 0.404874  | 0.792363  | 0            | 1         | 1         |
| Efhc2_j2      | 0         | 0.0885619 | 1.79769e+308 | 0.0434205 | 1         |
| Efhc2_j1      | 0.0327232 | 0.308816  | 3.23836      | 0.0067106 | 0.0637052 |
| 4930578C19Rik | 0.067794  | 0.124838  | 0.880826     | 0.296361  | 1         |
| Syn1_j6       | 4.84231   | 14.4741   | 0            | 1         | 1         |
| Syn1_j7       | 10.9257   | 12.8873   | 0            | 1         | 1         |
| Zfp182_j3     | 0         | 0.065871  | 0            | 1         | 1         |
| Klhl13_j5     | 0         | 0.103692  | 0            | 1         | 1         |
| Sept6_j7      | 0         | 0.384809  | 1.79769e+308 | 0.0002401 | 0.0044596 |
| Rpl39_j4      | 3.30963   | 6.56757   | 0.988691     | 0.0126861 | 0.102195  |
| Cul4b_j3      | 4.50966   | 4.80942   | 0            | 1         | 1         |
| Thoc2_j5      | 0.684888  | 0.985347  | 0.524762     | 0.0868905 | 0.360342  |
| Thoc2_j6      | 0         | 0.122537  | 1.79769e+308 | 0.0008592 | 1         |
| Smarca1_j2    | 0         | 0.223166  | 0            | 1         | 1         |
| Smarca1_j7    | 1.17113   | 1.09244   | 0            | 1         | 1         |

|                  |           |           |              |           |           |
|------------------|-----------|-----------|--------------|-----------|-----------|
| Apln_j3          | 0         | 0.115158  | 1.79769e+308 | 0.0129702 | 1         |
| Zdhhc9_j1        | 0         | 0.103999  |              | 0 1       | 1         |
| Aifm1_j1         | 5.09286   | 5.24394   |              | 0 1       | 1         |
| Enox2_j8         | 0.156543  | 0.344778  |              | 0 1       | 1         |
| 6720401G13Rik_j2 | 0.83032   | 0.755479  |              | 0 1       | 1         |
| 6720401G13Rik_j6 | 3.70318   | 3.76535   |              | 0 1       | 1         |
| Frmd7_j4         | 0.640449  | 0.346173  | -0.88759     | 0.0189295 | 0.135769  |
| Hs6st2           | 1.28852   | 1.23176   | 0            | 1         | 1         |
| AK021262_j1      | 0.0703577 | 0.131685  | 0.904311     | 0.474398  | 1         |
| Fam122b_j1       | 0.105682  | 0.269078  | 1.3483       | 0.0478127 | 0.251307  |
| Mospd1_j1        | 0.496691  | 0.615459  | 0            | 1         | 1         |
| XLOC_036643      | 0.306836  | 0.147984  | -1.05203     | 0.116518  | 0.424567  |
| Rbmx_j3          | 3.71885   | 3.37711   | -0.139069    | 0.520604  | 0.797932  |
| Fgf13_j6         | 0         | 0.351827  | 0            | 1         | 1         |
| Fgf13_j7         | 132.274   | 126.902   | 0            | 1         | 1         |
| Fgf13_j1         | 0         | 0.406094  | 1.79769e+308 | 0.120241  | 0.431782  |
| Atp11c_j5        | 0.305492  | 0.68      | 1.1544       | 0.0103272 | 0.0876239 |
| Atp11c_j7        | 0         | 0.114383  | 1.79769e+308 | 0.001961  | 1         |
| Ids_j5           | 1.0508    | 0.463471  | 0            | 1         | 1         |
| Gabra3_j2        | 0         | 0.259609  | 0            | 1         | 1         |
| Gabra3_j1        | 0.84456   | 0.892869  | 0            | 1         | 1         |
| Pnck             | 1.695     | 2.81689   | 0            | 1         | 1         |
| Pnck_j2          | 0.178699  | 0.229566  | 0            | 1         | 1         |
| Pdzd4_j1         | 0.196301  | 0.325068  | 0.727676     | 0.167122  | 0.50341   |
| Pdzd4            | 2.10348   | 1.37802   | -0.610182    | 0.007972  | 0.0723541 |
| Arhgap4          | 0.268904  | 0.399229  | 0.570125     | 0.156127  | 0.489534  |
| Naa10_j2         | 1.24401   | 0.981424  | -0.342045    | 0.509185  | 0.790813  |
| Renbp_j1         | 0.373318  | 0.357956  | -0.0606228   | 0.893204  | 0.966313  |
| Hcfc1_j9         | 4.35906   | 5.03039   | 0.206653     | 0.237669  | 0.584476  |
| Irak1_j2         | 0.292194  | 0.154704  | 0            | 1         | 1         |
| Mecp2_j2         | 1.94992   | 2.32915   | 0            | 1         | 1         |
| Flna_j8          | 0.031986  | 0.101726  | 1.66918      | 0.0255055 | 1         |
| Flna_j16         | 3.58377   | 4.50986   | 0.331604     | 0.0042662 | 0.0449979 |
| Flna_j14         | 0.326698  | 0.111055  | -1.55669     | 0.0005031 | 0.008185  |
| Flna_j15         | 1.83872   | 2.11564   | 0.202391     | 0.173139  | 0.510747  |
| Ubl4             | 8.47922   | 6.54878   | 0            | 1         | 1         |
| G6pdx_j1         | 16.0545   | 21.0175   | 0.388614     | 0.0002283 | 0.0042812 |
| F8_j8            | 0         | 0.0509927 | 1.79769e+308 | 0.0153967 | 1         |
| Prrg1_j4         | 0.260698  | 0.215062  | -0.277625    | 0.612177  | 0.847323  |
| Prrg1_j5         | 0.335129  | 0.357947  | 0.0950289    | 0.828185  | 0.944579  |
| Prrg1_j6         | 0         | 0.0542135 | 1.79769e+308 | 0.0500126 | 1         |
| Pola1_j1         | 0         | 0.0695713 | 1.79769e+308 | 0.0109039 | 1         |
| Zfx_j2           | 0         | 0.0605401 | 0            | 1         | 1         |
| Arhgef9_j4       | 0.348252  | 1.09146   | 0            | 1         | 1         |
| Las1_j2          | 1.71342   | 2.79969   | 0.708389     | 0.0086825 | 0.0771353 |
| Zmym3_j1         | 9.18789   | 13.0998   | 0            | 1         | 1         |
| Zmym3_j3         | 1.40468   | 4.20242   | 0            | 1         | 1         |

|                  |           |           |              |           |          |
|------------------|-----------|-----------|--------------|-----------|----------|
| Rps4x_j4         | 16.9186   | 18.0882   | 0.0964434    | 0.701424  | 0.890328 |
| Cited1           | 0.522454  | 0.687982  | 0.397067     | 0.50073   | 0.785042 |
| Phka1_j4         | 0.034758  | 0.213859  | 0            | 1         | 1        |
| XLOC_036762      | 0         | 0.0565098 | 1.79769e+308 | 0.114209  | 1        |
| B230206F22Rik_j5 | 0.272647  | 0.505999  | 0.892102     | 0.0246509 | 0.16278  |
| Slc16a2_j1       | 2.21976   | 2.31145   | 0            | 1         | 1        |
| Zdhhc15_j1       | 0.235576  | 0.347705  | 0            | 1         | 1        |
| 5330434G04Rik_j1 | 0.487394  | 0.524845  | 0            | 1         | 1        |
| Atrx_j9          | 0.622747  | 0.681539  | 0            | 1         | 1        |
| Atrx_j8          | 0.290767  | 0.429571  | 0            | 1         | 1        |
| Taf9b_j1         | 0         | 0.31878   | 0            | 1         | 1        |
| 2610002M06Rik_j1 | 0.287058  | 0.166528  | -0.785576    | 0.517444  | 0.795737 |
| Brwd3_j5         | 0         | 0.0601333 | 1.79769e+308 | 0.0026928 | 1        |
| Hdx              | 0.453888  | 0.568464  | 0.324732     | 0.144109  | 0.471077 |
| Chm_j5           | 2.23283   | 1.58726   | 0            | 1         | 1        |
| Xkrx             | 0.0258791 | 0.176861  | 2.77276      | 0.0935135 | 0.376659 |
| Btk              | 0.0882193 | 0.251141  | 1.50933      | 0.027245  | 0.174397 |
| Armcx6_j4        | 1.25399   | 0.970333  | 0            | 1         | 1        |
| Armcx2_j1        | 14.678    | 16.7545   | 0            | 1         | 1        |
| Tceal6_j2        | 3.07163   | 3.06308   | -0.00402066  | 0.98775   | 0.996374 |
| Bex2_j2          | 35.8813   | 47.7071   | 0            | 1         | 1        |
| Tceal5_j1        | 0.146854  | 0.558819  | 0            | 1         | 1        |
| Tceal5_j2        | 4.0696    | 2.50325   | 0            | 1         | 1        |
| Rab9b_j2         | 5.48557   | 4.68727   | 0            | 1         | 1        |
| Tmsb15l_j3       | 1.1219    | 0.958761  | -0.226706    | 0.562616  | 0.822283 |
| Mcart6_j1        | 0.0268294 | 0.0503554 | 0            | 1         | 1        |
| Ripply1_j2       | 0         | 0.078339  | 1.79769e+308 | 0.120384  | 1        |
| Morc4_j3         | 0         | 0.130017  | 1.79769e+308 | 0.0030566 | 1        |
| Ammecr1_j3       | 0.110449  | 0.315052  | 0            | 1         | 1        |
| Chrdl1_j3        | 0         | 0.0854164 | 1.79769e+308 | 0.0731158 | 1        |
| Dcx              | 0.0258989 | 0.16477   | 2.66949      | 0.0001245 | 0.002576 |
| Lrch2_j3         | 0.111856  | 0.181452  | 0            | 1         | 1        |
| Tro_j3           | 3.04777   | 4.2674    | 0            | 1         | 1        |
| Maged2_j2        | 1.3647    | 1.14372   | 0            | 1         | 1        |
| Tsr2             | 1.70009   | 2.20755   | 0            | 1         | 1        |
| Tsr2             | 1.49996   | 1.92374   | 0            | 1         | 1        |
| Tspsy12_j1       | 9.44736   | 10.5343   | 0            | 1         | 1        |
| Gpr173_j2        | 0.657183  | 0.444829  | -0.563044    | 0.0819828 | 0.348903 |
| Mbtps2_j4        | 0.696976  | 0.92895   | 0            | 1         | 1        |
| Pdha1_j1         | 62.7924   | 62.1118   | 0            | 1         | 1        |
| Ppef1_j6         | 1.43671   | 2.72425   | 0            | 1         | 1        |
| Cdkl5_j4         | 0.0884792 | 0.191245  | 1.11201      | 0.0743541 | 0.328754 |
| Nhs_j1           | 0.0587715 | 0.124409  | 1.0819       | 0.043497  | 1        |
| Txlng_j2         | 2.55826   | 2.71195   | 0.0841659    | 0.594612  | 0.838568 |
| Siah1b_j1        | 1.48175   | 1.38353   | -0.0989492   | 0.703578  | 0.891492 |
| Bmx_j5           | 0.0473597 | 0.049993  | 0.0780661    | 0.962854  | 1        |
| Frmpd4_j1        | 3.23348   | 1.21821   | -1.40832     | 7.44E-14  | 1.26E-11 |

|                  |            |           |              |           |           |
|------------------|------------|-----------|--------------|-----------|-----------|
| Msl3_j6          | 2.48718    | 2.29743   | -0.11449     | 0.596108  | 0.839228  |
| Msl3_j4          | 0.0746683  | 0.140657  | 0.913612     | 0.148315  | 1         |
| Msl3_j8          | 1.76113    | 1.73694   | -0.0199575   | 0.951343  | 0.985905  |
| Syp_j2           | 4.01395    | 1.05016   | -1.93442     | 1.75E-05  | 0.0004969 |
| Wdr45            | 13.5296    | 13.3486   | -0.0194268   | 0.880442  | 0.961931  |
| Prpf2_j4         | 81.4772    | 89.6751   | 0.138311     | 0.151243  | 0.482292  |
| Xk_j2            | 1.6595     | 1.63283   | 0            | 1         | 1         |
| AK036020_j6      | 0          | 0.0848649 | 1.79769e+308 | 0.0809883 | 1         |
| Usp9x_j4         | 0.214731   | 0.547711  | 0            | 1         | 1         |
| Usp9x_j12        | 4.84525    | 3.8189    | -0.343416    | 0.0182366 | 0.132181  |
| Gpr34            | 0.0393633  | 0.497799  | 0            | 1         | 1         |
| Uba1             | 13.5547    | 10.7812   | 0            | 1         | 1         |
| Uba1_j6          | 48.7877    | 44.0366   | 0            | 1         | 1         |
| Cdk16_j7         | 7.24335    | 6.49796   | 0            | 1         | 1         |
| Cdk16_j9         | 22.5565    | 31.2475   | 0            | 1         | 1         |
| Dock11_j6        | 0.500756   | 0.538193  | 0            | 1         | 1         |
| Dock11_j12       | 0.455126   | 0.913701  | 0            | 1         | 1         |
| Lonrf3_j2        | 0          | 0.0577604 | 1.79769e+308 | 0.133823  | 1         |
| Slc25a43_j3      | 0          | 0.124026  | 1.79769e+308 | 0.105785  | 1         |
| 2610018G03Rik_j1 | 0.798985   | 0.797011  | -0.00356996  | 0.992774  | 0.997911  |
| XLOC_036258      | 0.190352   | 0.233533  | 0            | 1         | 1         |
| Cxx1c_j2         | 35.976     | 33.7639   | 0            | 1         | 1         |
| Zfp449_j1        | 3.41E-05   | 0.746206  | 14.4175      | 0.940174  | 0.981805  |
| Ddx26b_j7        | 0          | 0.197862  | 0            | 1         | 1         |
| F9_j3            | 0          | 0.165586  | 1.79769e+308 | 0.0038473 | 0.0416986 |
| C230004F18Rik_j6 | 0.257207   | 0.189865  | -0.437956    | 0.181732  | 0.521931  |
| C230004F18Rik_j8 | 0.593698   | 0.42043   | -0.497862    | 0.0141186 | 0.110166  |
| Fmr1_j1          | 0          | 0.23044   | 0            | 1         | 1         |
| Mttr1            | 0.202538   | 0.163749  | 0            | 1         | 1         |
| Hmgb3_j5         | 0.618501   | 5.05876   | 3.03194      | 0         | 0         |
| XLOC_036295      | 2.54E-06   | 0.102645  | 15.3009      | 0.998928  | 1         |
| Prrg3            | 0.270411   | 0.517849  | 0            | 1         | 1         |
| Xlr3b_j1         | 0          | 0.152012  | 1.79769e+308 | 0.0213227 | 1         |
| Atp2b3_j1        | 0.248246   | 0.115179  | -1.10789     | 0.0766577 | 0.334708  |
| Abcd1_j1         | 0.00041873 | 0.0814469 | 7.6037       | 0.735211  | 1         |
| Plxb3_j5         | 0.48842    | 0.431343  | 0            | 1         | 1         |
| Plxb3_j6         | 0.521635   | 0.638681  | 0            | 1         | 1         |
| Plxb3_j10        | 0.99817    | 0.982488  | 0            | 1         | 1         |
| Taz_j2           | 1.05533    | 1.02228   | 0            | 1         | 1         |
| XLOC_036317      | 0.411319   | 0.386068  | 0            | 1         | 1         |
| Atp6ap1_j4       | 1.18092    | 1.70458   | 0            | 1         | 1         |
| Gdi1_j3          | 0.504805   | 1.00461   | 0            | 1         | 1         |
| Plxna3_j5        | 0.787427   | 0.961694  | 0            | 1         | 1         |
| Xlr3e-ps_j2      | 0.0453829  | 0.138152  | 1.60604      | 0.221972  | 1         |
| Xlr4e-ps_j1      | 0.0904915  | 0.0346123 | -1.3865      | 0.404585  | 1         |
| Dkc1_j3          | 2.92429    | 3.59204   | 0.296718     | 0.20819   | 0.552263  |
| Fundc2_j2        | 15.3845    | 14.6534   | -0.0702438   | 0.628744  | 0.855636  |



|                  |           |             |              |           |           |
|------------------|-----------|-------------|--------------|-----------|-----------|
| Dmd_j14          | 0         | 0.0629325   | 0            | 1         | 1         |
| XLOC_036353      | 0.0685615 | 0.148148    | 1.11157      | 0.095792  | 1         |
| AK050859_j4      | 4.15021   | 4.58496     | 0            | 1         | 1         |
| AK050859_j5      | 0.13091   | 0.160781    | 0            | 1         | 1         |
| Gdpd2_j5         | 0         | 0.240107    | 1.79769e+308 | 0.0009655 | 0.0139071 |
| Gdpd2_j10        | 0.0590769 | 0.119982    | 1.02215      | 0.295654  | 1         |
| Dlg3_j3          | 0         | 0.168029    | 0            | 1         | 1         |
| Dlg3_j6          | 0         | 0.219741    | 0            | 1         | 1         |
| Nono_j3          | 15.1354   | 13.9641     | -0.116207    | 0.407231  | 0.727764  |
| Taf1_j5          | 7.68936   | 8.93394     | 0            | 1         | 1         |
| Ogt_j5           | 0         | 0.0955421   | 1.79769e+308 | 0.0053098 | 1         |
| 2010000I03Rik_j1 | 0.225926  | 0.346686    | 0.617776     | 0.526647  | 0.801167  |
| 2010000I03Rik_j1 | 0.0303146 | 0.07871     | 1.37654      | 0.390336  | 1         |
| XLOC_036390      | 0.241521  | 0.201382    | 0            | 1         | 1         |
| Cox7b_j1         | 0         | 0.0905691   | 1.79769e+308 | 0.230141  | 1         |
| Tlr13            | 0.0584322 | 0.130103    | 1.15482      | 0.316732  | 1         |
| 2810403D21Rik_j5 | 0.0615188 | 0.166407    | 1.43562      | 0.547059  | 0.813394  |
| Sh3bgrl_j2       | 0         | 0.0958059   | 0            | 1         | 1         |
| Zfp711_j6        | 0.346142  | 0.407923    | 0.236935     | 0.574675  | 0.828142  |
| Dach2_j1         | 0.0678433 | 0.188145    | 1.47157      | 0.115849  | 0.423558  |
| XLOC_036420      | 0.116578  | 0.106953    | -0.124319    | 0.86447   | 1         |
| Diap2_j2         | 0.101727  | 0.188325    | 0.888518     | 0.0467863 | 0.248134  |
| Cstf2            | 1.28282   | 1.04803     | 0            | 1         | 1         |
| Cenpi            | 0.124966  | 0.185598    | 0.570651     | 0.327271  | 0.670236  |
| Drp2_j4          | 0         | 0.105193    | 0            | 1         | 1         |
| Armcx1_j3        | 2.58028   | 3.21805     | 0            | 1         | 1         |
| Armcx3_j3        | 0.132728  | 0.211893    | 0            | 1         | 1         |
| XLOC_036434      | 0.309016  | 0.400351    | 0.373584     | 0.17392   | 0.512009  |
| Gprasp1_j5       | 1.44679   | 1.28324     | -0.17306     | 0.403332  | 0.726254  |
| BC065397_j3      | 0.0447548 | 0.117871    | 0            | 1         | 1         |
| BC065397_j2      | 0.0166972 | 0.0633632   | 0            | 1         | 1         |
| Plp1_j2          | 27.4132   | 25.71       | 0            | 1         | 1         |
| Zcchc18          | 0.217693  | 0.184173    | 0            | 1         | 1         |
| Fam199x_j2       | 1.06684   | 0.769552    | 0            | 1         | 1         |
| Tbc1d8b_j3       | 0         | 0.208977    | 1.79769e+308 | 0.0001169 | 0.00245   |
| Col4a5_j7        | 0.16314   | 0.191199    | 0.228969     | 0.668984  | 0.874746  |
| Nxt2_j2          | 0.290381  | 0.909632    | 0            | 1         | 1         |
| Tmem164_j7       | 3.25296   | 3.08311     | 0            | 1         | 1         |
| Alg13_j6         | 0.16059   | 0.51493     | 1.681        | 0.0058476 | 0.0573419 |
| Pfkfb1_j2        | 0         | 0.102347    | 1.79769e+308 | 0.0527817 | 1         |
| Pfkfb1_j3        | 0.0241573 | 0.0980844   | 2.02156      | 0.183847  | 1         |
| Phf8_j3          | 0.0968507 | 0.000861084 | -6.81346     | 0.319182  | 1         |
| Huwe1_j14        | 1.71712   | 2.21422     | 0            | 1         | 1         |
| lqsec2           | 2.73197   | 3.04976     | 0            | 1         | 1         |
| Rragb_j2         | 8.33088   | 6.7601      | 0            | 1         | 1         |
| Rragb_j4         | 7.53826   | 6.87976     | 0            | 1         | 1         |
| Klf8_j3          | 0         | 0.21447     | 0            | 1         | 1         |

|                  |           |           |              |           |           |
|------------------|-----------|-----------|--------------|-----------|-----------|
| Spin2_j4         | 0.0855059 | 0.287123  | 1.74757      | 0.139066  | 0.463653  |
| XLOC_036497      | 0.810986  | 0.611593  | -0.407105    | 0.559286  | 0.820587  |
| Rps6ka3_j2       | 0.117953  | 0.354956  | 0            | 1         | 1         |
| Rps6ka3_j6       | 0         | 0.37239   | 0            | 1         | 1         |
| Rps6ka3_j7       | 1.77362   | 1.46455   | 0            | 1         | 1         |
| Sh3kbp1_j6       | 0.0261261 | 0.0767802 | 0            | 1         | 1         |
| Phka2            | 0.953181  | 0.956072  | 0            | 1         | 1         |
| Rbbp7_j3         | 16.1082   | 16.6965   | 0            | 1         | 1         |
| Rbbp7_j5         | 0.0119387 | 0.0839909 | 0            | 1         | 1         |
| Figf_j6          | 0.186807  | 0.469464  | 1.32947      | 0.0592132 | 0.285966  |
| Gpm6b            | 1.76754   | 1.27386   | 0            | 1         | 1         |
| Mid1_j5          | 0.313304  | 0.473254  | 0.595054     | 0.212805  | 0.557725  |
| Clcn5_j2         | 0.0505706 | 0.103599  | 0            | 1         | 1         |
| Ccdc22_j6        | 0.128874  | 0.584623  | 2.18154      | 0.0024171 | 0.0290751 |
| Magix_j2         | 0.0489257 | 0.180472  | 1.88311      | 0.0278059 | 0.176748  |
| Hdac6_j2         | 0.299422  | 0.533868  | 0            | 1         | 1         |
| Was_j1           | 0.0771852 | 0.205431  | 1.41226      | 0.227643  | 0.574755  |
| Porcn_j1         | 4.6152    | 5.24067   | 0.183357     | 0.420339  | 0.736671  |
| Cybb_j1          | 0.158547  | 0.427704  | 0            | 1         | 1         |
| Gm10489          | 2.60294   | 2.39084   | 0            | 1         | 1         |
| XLOC_036575      | 0.0732551 | 0.102531  | 0.48506      | 0.644961  | 1         |
| mKIAA1575_j3     | 0.246881  | 0.290861  | 0            | 1         | 1         |
| Cask_j9          | 1.45521   | 2.25887   | 0            | 1         | 1         |
| Ndp_j1           | 2.34675   | 2.70193   | 0            | 1         | 1         |
| Ndufb11_j1       | 21.6728   | 21.0945   | -0.0390181   | 0.73793   | 0.907745  |
| Akap17b_j1       | 0.280861  | 0.896804  | 0            | 1         | 1         |
| Akap17b_j2       | 0.25113   | 0.278789  | 0            | 1         | 1         |
| C330007P06Rik_j1 | 1.60036   | 1.49965   | -0.09377     | 0.801522  | 0.933853  |
| Sept6_j2         | 0         | 0.14335   | 1.79769e+308 | 0.0184955 | 1         |
| Sept6_j3         | 3.18745   | 2.83433   | -0.169397    | 0.386297  | 0.714542  |
| Rpl39_j3         | 1.90886   | 2.31033   | 0.275386     | 0.175999  | 0.514591  |
| Cul4b_j2         | 0.445138  | 0.160027  | 0            | 1         | 1         |
| Odz1_j3          | 0.0595166 | 0.0620714 | 0            | 1         | 1         |
| Smarca1_j4       | 0.370277  | 0.143902  | 0            | 1         | 1         |
| Zdhhc9_j3        | 1.68623   | 3.23776   | 0            | 1         | 1         |
| Zfp280c_j9       | 0.83151   | 0.962286  | 0.210732     | 0.434966  | 0.745916  |
| Zfp280c_j8       | 0         | 0.154488  | 1.79769e+308 | 0.0028087 | 1         |
| Enox2_j7         | 0         | 0.0567504 | 0            | 1         | 1         |
| Enox2_j6         | 0.380662  | 0.252362  | 0            | 1         | 1         |
| 6720401G13Rik_j3 | 1.66232   | 1.74526   | 0            | 1         | 1         |
| 6720401G13Rik_j8 | 11.4716   | 11.2918   | 0            | 1         | 1         |
| Hs6st2_j4        | 2.12776   | 3.59895   | 0            | 1         | 1         |
| Fam122b_j6       | 0.365701  | 0.289371  | -0.337742    | 0.524986  | 0.800458  |
| AK082553_j2      | 0.227745  | 0.224534  | -0.0204911   | 0.979523  | 0.994006  |
| Mtap7d3_j2       | 0.0194806 | 0.0637107 | 1.7095       | 0.447387  | 1         |
| Rbmx_j2          | 0.0907994 | 0.12652   | 0.478612     | 0.478537  | 1         |
| Fgf13_j4         | 0         | 0.308334  | 0            | 1         | 1         |

|                  |             |           |              |           |           |
|------------------|-------------|-----------|--------------|-----------|-----------|
| Mcf2_j6          | 0.341282    | 0.421198  | 0.303534     | 0.714946  | 0.896793  |
| Mcf2_j7          | 0.0628777   | 0.0583791 | -0.107096    | 0.914107  | 1         |
| Atp11c_j4        | 0.149083    | 0.166602  | 0.16029      | 0.843227  | 0.950389  |
| Slitrk4          | 8.58E-05    | 0.377961  | 0            | 1         | 1         |
| Ids              | 36.8962     | 31.9501   | 0            | 1         | 1         |
| Cd99l2_j3        | 6.53526     | 7.05902   | 0            | 1         | 1         |
| Xlr3a_j1         | 0.332658    | 0.156638  | -1.0866      | 0.463993  | 0.764451  |
| Xlr4c_j1         | 0.000738596 | 0.106492  | 7.17175      | 0.857856  | 1         |
| Pnck_j1          | 0.180405    | 0.204218  | 0            | 1         | 1         |
| XLOC_036679      | 0.0334602   | 0.0475082 | 0.505729     | 0.727139  | 1         |
| L1cam_j4         | 42.9832     | 60.256    | 0            | 1         | 1         |
| Arhgap4_j2       | 0.163066    | 0.305254  | 0.904557     | 0.130865  | 0.450443  |
| Arhgap4          | 0.0652685   | 0.0688318 | 0.0766885    | 0.936871  | 1         |
| Arhgap4_j1       | 0.112771    | 0.417988  | 1.89007      | 0.0001955 | 0.0037692 |
| Naa10_j5         | 0           | 0.87073   | 1.79769e+308 | 0.0014238 | 0.0189456 |
| Renbp_j2         | 0.524122    | 0.387101  | -0.437194    | 0.509348  | 0.790813  |
| Renbp_j3         | 0           | 0.471423  | 1.79769e+308 | 0.0010765 | 0.015147  |
| Hcfc1_j6         | 5.4288      | 5.10236   | -0.0894693   | 0.467777  | 0.766747  |
| Hcfc1_j7         | 2.09816     | 1.98899   | -0.0770894   | 0.621691  | 0.851876  |
| Irak1_j3         | 2.28521     | 3.02988   | 0            | 1         | 1         |
| Irak1_j4         | 2.14338     | 2.29405   | 0            | 1         | 1         |
| Mecp2_j1         | 2.631       | 3.69076   | 0            | 1         | 1         |
| Flna_j7          | 1.94376     | 3.16802   | 0.704732     | 0.0002013 | 0.0038565 |
| Flna_j12         | 0.0957131   | 0.344367  | 1.84716      | 2.41E-06  | 8.95E-05  |
| Dnase1l1         | 2.69413     | 3.27689   | 0            | 1         | 1         |
| Dnase1l1_j1      | 4.05587     | 4.5784    | 0            | 1         | 1         |
| Gab3_j3          | 0.0692686   | 0.143956  | 1.05536      | 0.268554  | 1         |
| Mpp1_j1          | 19.849      | 23.1615   | 0            | 1         | 1         |
| Pls3             | 7.37045     | 8.51622   | 0            | 1         | 1         |
| Pdk3_j2          | 11.6462     | 9.25134   | 0            | 1         | 1         |
| Arhgef9          | 0.393542    | 0.410905  | 0            | 1         | 1         |
| Arhgef9_j8       | 0.21736     | 1.06144   | 0            | 1         | 1         |
| Fam123b_j2       | 3.11366     | 3.51741   | 0            | 1         | 1         |
| Fam123b_j1       | 0.999007    | 1.69266   | 0            | 1         | 1         |
| XLOC_036739      | 0.158186    | 0.172241  | 0.122805     | 0.831037  | 0.945521  |
| Slc7a3_j1        | 0           | 0.18654   | 1.79769e+308 | 0.0108429 | 0.0907994 |
| Il2rg_j5         | 0.226808    | 0.230981  | 0.0263005    | 0.980325  | 0.994006  |
| Zmym3_j11        | 0.141579    | 0.0846328 | 0            | 1         | 1         |
| Zmym3_j13        | 0.498023    | 3.71135   | 0            | 1         | 1         |
| Cxcr3            | 0.0582646   | 0.157479  | 1.43447      | 0.133393  | 1         |
| Rps4x_j1         | 4.37678     | 4.23865   | -0.0462643   | 0.825728  | 0.943781  |
| B230206F22Rik_j3 | 1.08838     | 0.99773   | -0.125464    | 0.779817  | 0.925661  |
| Zdhhc15_j3       | 1.9706      | 2.76852   | 0            | 1         | 1         |
| 5530601H04Rik_j1 | 0.00458134  | 0.265609  | 5.85739      | 0.194507  | 0.53676   |
| 5330434G04Rik_j3 | 1.39549     | 1.80652   | 0            | 1         | 1         |
| Atrx_j1          | 0.606613    | 0.554696  | 0            | 1         | 1         |
| Atrx_j10         | 0.37082     | 0.318691  | 0            | 1         | 1         |

|              |             |           |              |           |           |
|--------------|-------------|-----------|--------------|-----------|-----------|
| Cysltr1_j1   | 0.0467878   | 0.092528  | 0.983757     | 0.442408  | 1         |
| Chm_j3       | 0.21383     | 0.132704  | 0            | 1         | 1         |
| Gm14957_j1   | 0.910657    | 0.574283  | -0.665146    | 0.297048  | 0.64365   |
| Trmt2b_j3    | 0.997594    | 1.05658   | 0.0828824    | 0.795819  | 0.931999  |
| Zmat1_j3     | 1.24914     | 1.66061   | 0            | 1         | 1         |
| Tmsb15l_j2   | 0           | 0.195708  | 1.79769e+308 | 0.0271128 | 0.173908  |
| Mcart6_j3    | 0.0508619   | 0.0961006 | 0            | 1         | 1         |
| Mcart6       | 0.766636    | 0.376487  | 0            | 1         | 1         |
| Ripply1_j1   | 0           | 0.0598384 | 1.79769e+308 | 0.168651  | 1         |
| Capn6_j4     | 0.0320052   | 0.198726  | 2.63441      | 1         | 1         |
| Lhfp1l_j2    | 2.48461     | 2.0906    | 0            | 1         | 1         |
| Apex2_j1     | 0.000981002 | 0.830687  | 9.72583      | 0.769021  | 0.921341  |
| Tro_j2       | 2.83734     | 4.44273   | 0            | 1         | 1         |
| Maged2_j3    | 2.82525     | 1.95394   | 0            | 1         | 1         |
| Gnl3l_j1     | 5.2389      | 10.4398   | 0            | 1         | 1         |
| Tspyl2_j3    | 0.382766    | 0.973564  | 0            | 1         | 1         |
| Gpr173_j6    | 1.04711     | 2.04346   | 0.9646       | 2.15E-05  | 0.000589  |
| Mageh1       | 9.16323     | 8.60816   | -0.0901511   | 0.521059  | 0.798005  |
| Prdx4_j2     | 0.354749    | 0.303699  | -0.224158    | 0.80263   | 0.934384  |
| Ppef1_j8     | 1.19169     | 4.58531   | 0            | 1         | 1         |
| Reps2_j3     | 0           | 0.418393  | 0            | 1         | 1         |
| Reps2_j4     | 0.489118    | 0.834397  | 0            | 1         | 1         |
| Tceanc_j3    | 0           | 0.0924719 | 1.79769e+308 | 0.0078881 | 1         |
| Frmpr4_j6    | 0.742303    | 0.466319  | -0.670691    | 0.013211  | 0.105241  |
| Frmpr4_j7    | 0           | 0.0795654 | 1.79769e+308 | 0.0023264 | 1         |
| Frmpr4_j8    | 0.0607624   | 0.0704704 | 0.21384      | 0.746645  | 1         |
| Msl3_j3      | 0           | 0.131835  | 1.79769e+308 | 0.00163   | 1         |
| Syp_j3       | 0.0174935   | 0.624497  | 5.1578       | 0.0017093 | 0.0220499 |
| Praf2_j1     | 0.150891    | 0.381485  | 1.33812      | 0.125443  | 0.441203  |
| Otud5_j1     | 1.77528     | 2.53488   | 0            | 1         | 1         |
| Otud5_j2     | 1.71997     | 1.24896   | 0            | 1         | 1         |
| Gm6787_j1    | 0.906434    | 0.967131  | 0.093509     | 0.832556  | 0.945929  |
| Tspan7_j1    | 0.636495    | 1.47991   | 1.21728      | 0.041646  | 0.230244  |
| AK036020_j5  | 0.023073    | 0.120427  | 2.38388      | 0.238864  | 1         |
| AK036020_j10 | 0.0273235   | 0.0999266 | 1.87073      | 0.366662  | 1         |
| AK036020_j11 | 0.102243    | 0.116354  | 0.18652      | 0.854228  | 1         |
| Kdm6a_j4     | 0.120474    | 0.295989  | 1.29683      | 0.0082879 | 0.0745957 |
| Kdm6a_j10    | 3.01276     | 3.14148   | 0.0603583    | 0.806643  | 0.936053  |
| XLOC_036208  | 0.0976855   | 0.118523  | 0.27895      | 0.652493  | 1         |
| Uba1_j5      | 0.58264     | 0.236418  | 0            | 1         | 1         |
| Cdk16_j1     | 54.9255     | 62.498    | 0            | 1         | 1         |
| Cdk16_j6     | 2.62187     | 2.71098   | 0            | 1         | 1         |
| Cdk16_j8     | 1.90497     | 2.33204   | 0            | 1         | 1         |
| Dock11_j1    | 0.234244    | 0.661147  | 0            | 1         | 1         |
| Dock11_j10   | 7.68268     | 6.95134   | 0            | 1         | 1         |
| XLOC_036226  | 0.12135     | 0.133465  | 0.137294     | 0.819158  | 1         |
| Slc25a5_j3   | 115.798     | 97.3452   | -0.250425    | 0.0113958 | 0.0944401 |

|                  |            |           |              |           |           |
|------------------|------------|-----------|--------------|-----------|-----------|
| Gm14549          | 0.196909   | 0.271273  | 0.462219     | 0.509222  | 0.790813  |
| Ube2a            | 0.181536   | 2.26845   | 3.64339      | 0         | 0         |
| Gria3_j11        | 0.213084   | 0.133452  | -0.675106    | 0.215104  | 0.560764  |
| Stag2_j4         | 0.00303639 | 0.716491  | 0            | 1         | 1         |
| Stag2_j5         | 0.0279842  | 0.750357  | 0            | 1         | 1         |
| Stag2_j7         | 3.2088     | 2.67322   | 0            | 1         | 1         |
| Ocrl_j2          | 0.082673   | 0.115877  | 0.487109     | 0.489478  | 1         |
| Bcorl1_j1        | 0.287527   | 0.713257  | 1.31072      | 0.0039517 | 0.0425339 |
| Slc25a14_j6      | 0.750166   | 0.781341  | 0            | 1         | 1         |
| Slc25a14_j10     | 0          | 0.229913  | 0            | 1         | 1         |
| Phf6_j1          | 1.36493    | 1.36965   | 0            | 1         | 1         |
| 4930502E18Rik_j1 | 0.850723   | 0.519663  | -0.711112    | 0.130544  | 0.449911  |
| Slc9a6_j3        | 13.0188    | 13.6943   | 0            | 1         | 1         |
| Fhl1_j3          | 3.78554    | 4.52633   | 0            | 1         | 1         |
| Fmr1             | 0.265461   | 0.50256   | 0            | 1         | 1         |
| Aff2_j5          | 0.114518   | 0.13008   | 0.183829     | 0.708755  | 1         |
| Mamld1_j4        | 4.99579    | 4.7393    | -0.0760392   | 0.634792  | 0.858242  |
| Mtm1_j3          | 3.32069    | 3.92266   | 0.240349     | 0.223338  | 0.57036   |
| Mtmr1_j6         | 0.049074   | 0.238764  | 0            | 1         | 1         |
| Mtmr1_j7         | 0.0590793  | 0.0867828 | 0            | 1         | 1         |
| Prrg3_j2         | 0          | 0.804042  | 0            | 1         | 1         |
| Nsdhl_j1         | 11.8694    | 12.363    | 0            | 1         | 1         |
| Xlr3b            | 0.41242    | 0.344135  | -0.26114     | 0.643717  | 0.862626  |
| Atp2b3_j10       | 7.9018     | 5.4346    | -0.540007    | 5.63E-05  | 0.0013192 |
| Plxnb3_j2        | 0.0680539  | 0.0523992 | 0            | 1         | 1         |
| Plxnb3_j9        | 0.224198   | 0.328381  | 0            | 1         | 1         |
| Ssr4             | 1.05375    | 1.00801   | -0.0640207   | 0.654079  | 0.867648  |
| Taz_j3           | 8.7617     | 9.12147   | 0            | 1         | 1         |
| Gdi1_j1          | 2.05359    | 2.23623   | 0            | 1         | 1         |
| Plxna3_j3        | 0.212245   | 0.236254  | 0            | 1         | 1         |
| Ikbkg_j1         | 0.769315   | 0.754861  | 0            | 1         | 1         |
| Dkc1_j1          | 3.32269    | 3.19202   | -0.0578824   | 0.692799  | 0.8862    |
| Dmd_j5           | 0          | 0.0544906 | 1.79769e+308 | 0.24608   | 1         |
| Dmd_j7           | 0.167965   | 0.207714  | 0.306438     | 0.661003  | 0.871471  |
| Tab3_j4          | 0          | 0.128706  | 0            | 1         | 1         |
| Apoo_j1          | 0.386666   | 0.848059  | 1.13308      | 0.0817988 | 0.348473  |
| XLOC_036353      | 0.120214   | 0.090459  | -0.410274    | 0.736836  | 1         |
| Gm14827_j7       | 0.352186   | 0.548862  | 0.640105     | 0.0653038 | 0.304504  |
| AK050859_j3      | 1.65497    | 1.40768   | 0            | 1         | 1         |
| AK050859_j2      | 0          | 0.151601  | 0            | 1         | 1         |
| Zc3h12b_j2       | 0.111409   | 0.153035  | 0.457992     | 0.661777  | 1         |
| F630028O10Rik_j1 | 0          | 0.36133   | 1.79769e+308 | 0.0093374 | 0.0814831 |
| Stard8_j4        | 0.202069   | 0.136872  | 0            | 1         | 1         |
| Stard8_j5        | 0.00030599 | 0.260297  | 0            | 1         | 1         |
| Gdpd2_j11        | 0.0483914  | 0.262241  | 2.43807      | 0.0138324 | 0.108559  |
| Foxo4_j1         | 0          | 0.0485627 | 1.79769e+308 | 0.0784657 | 1         |
| Taf1_j4          | 2.3132     | 3.44942   | 0            | 1         | 1         |

|                  |             |           |              |           |           |
|------------------|-------------|-----------|--------------|-----------|-----------|
| Pin4_j4          | 0           | 0.0526326 | 1.79769e+308 | 0.170793  | 1         |
| Uprt_j2          | 0.000252172 | 0.260815  | 10.0144      | 0.414316  | 0.73282   |
| Uprt_j1          | 1.0838      | 0.273159  | -1.98829     | 2.98E-09  | 2.29E-07  |
| Cox7b            | 26.0083     | 28.0564   | 0.109359     | 0.512579  | 0.792284  |
| Atp7a_j1         | 0.774999    | 0.804954  | 0.0547117    | 0.795786  | 0.931999  |
| 2810403D21Rik_j2 | 0.149939    | 0.223353  | 0.574954     | 0.668384  | 0.874447  |
| 2810403D21Rik_j3 | 0.0245378   | 0.0841425 | 1.77783      | 0.359485  | 1         |
| Tmem35_j3        | 2.66342     | 1.42069   | 0            | 1         | 1         |
| Armcx1_j4        | 2.13634     | 2.5569    | 0            | 1         | 1         |
| Gprasp1_j6       | 0.265511    | 0.299892  | 0.175672     | 0.672071  | 0.87616   |
| Bhlhb9           | 11.8195     | 8.38367   | 0            | 1         | 1         |
| Bex4             | 0.328039    | 0.58997   | 0            | 1         | 1         |
| BC065397_j7      | 16.0175     | 16.4373   | 0            | 1         | 1         |
| Plp1_j4          | 64.5084     | 68.4867   | 0            | 1         | 1         |
| Frmpd3_j10       | 0.187606    | 0.155591  | 0            | 1         | 1         |
| Mid2_j3          | 0.272217    | 0.42616   | 0            | 1         | 1         |
| Col4a5_j9        | 0           | 0.249878  | 1.79769e+308 | 7.48E-05  | 0.0016769 |
| Tmem164_j4       | 0.138832    | 0.0817099 | 0            | 1         | 1         |
| Pak3_j8          | 7.64E-05    | 0.45583   | 0            | 1         | 1         |
| Phf8_j4          | 0           | 0.445827  | 1.79769e+308 | 6.63E-08  | 3.79E-06  |
| Iqsec2_j1        | 13.0246     | 11.932    | 0            | 1         | 1         |
| Klf8_j1          | 5.67E-05    | 0.178845  | 0            | 1         | 1         |
| Klf8_j6          | 0.573561    | 0.5275    | 0            | 1         | 1         |
| Smpx_j4          | 1.68299     | 1.0562    | -0.672138    | 0.290031  | 0.637393  |
| Mtap7d2_j6       | 2.42747     | 2.55633   | 0            | 1         | 1         |
| Mtap7d2_j11      | 0.0902542   | 0.169681  | 0            | 1         | 1         |
| Sh3kbp1_j5       | 0           | 0.0585519 | 0            | 1         | 1         |
| Sh3kbp1_j9       | 0           | 0.125081  | 0            | 1         | 1         |
| Map3k15_j2       | 20.7604     | 23.1933   | 0            | 1         | 1         |
| Gpr64_j3         | 2.13104     | 0.334249  | 0            | 1         | 1         |
| Ctps2_j2         | 8.60006     | 7.56716   | 0            | 1         | 1         |
| Ap1s2_j3         | 0.362359    | 0.595905  | 0.717664     | 0.136577  | 0.459623  |
| Ap1s2_j2         | 1.14831     | 1.24839   | 0.120557     | 0.690141  | 0.885206  |
| XLOC_036520      | 0.748414    | 0.298834  | -1.32449     | 0.0004559 | 0.0075409 |
| Ace2_j1          | 0           | 0.0591334 | 1.79769e+308 | 0.0503604 | 1         |
| Figf_j3          | 0           | 0.0586898 | 1.79769e+308 | 0.128356  | 1         |
| Gemin8_j3        | 0           | 0.048293  | 1.79769e+308 | 0.259794  | 1         |
| Magix_j4         | 0           | 0.0666665 | 1.79769e+308 | 0.107024  | 1         |
| Hdac6_j3         | 0.0266104   | 0.0637853 | 0            | 1         | 1         |
| BC058988         | 0           | 0.0914024 | 1.79769e+308 | 0.0996967 | 1         |
| Cybb_j2          | 3.50E-05    | 0.248577  | 0            | 1         | 1         |
| Rpgr_j5          | 0.254652    | 0.402444  | 0.66026      | 0.187457  | 0.528387  |
| Bcor             | 0.00494055  | 0.288809  | 0            | 1         | 1         |
| Cask_j10         | 1.12119     | 1.56385   | 0            | 1         | 1         |
| Efhc2_j5         | 0.0308919   | 0.116446  | 1.91437      | 0.127934  | 1         |
| 4930578C19Rik_j2 | 0.00010345  | 0.0902198 | 9.76836      | 0.917446  | 1         |
| Ndufb11_j4       | 0           | 0.346035  | 1.79769e+308 | 0.0131723 | 0.105001  |

|                  |             |           |               |           |           |
|------------------|-------------|-----------|---------------|-----------|-----------|
| Ndufb11_j3       | 5.55186     | 6.33029   | 0.1893        | 0.338525  | 0.678819  |
| Syn1_j4          | 0.101902    | 0.279067  | 0             | 1         | 1         |
| Zfp182_j5        | 0.185797    | 0.983332  | 0             | 1         | 1         |
| Klhl13_j3        | 1.11922     | 0.620295  | 0             | 1         | 1         |
| Rpl39_j5         | 21.3726     | 23.978    | 0.165951      | 0.390027  | 0.717083  |
| Thoc2_j2         | 0.0879123   | 0.0634782 | -0.469804     | 0.501163  | 1         |
| Zdhhc9_j2        | 3.45071     | 5.64018   | 0             | 1         | 1         |
| Elf4_j3          | 0           | 0.0832334 | 1.79769e+308  | 0.0885432 | 1         |
| Zfp280c_j1       | 0.0941827   | 0.311935  | 1.72771       | 0.0112064 | 0.0933146 |
| Gpr119_j2        | 0.345309    | 0.682322  | 0.982564      | 0.0277138 | 0.176347  |
| Enox2_j2         | 0.37809     | 0.971188  | 0             | 1         | 1         |
| 6720401G13Rik_j4 | 0.0760114   | 0.0671947 | 0             | 1         | 1         |
| 6720401G13Rik_j5 | 0.819862    | 0.622402  | 0             | 1         | 1         |
| Fam122b_j5       | 0.721429    | 0.511178  | -0.497031     | 0.2504    | 0.598108  |
| XLOC_036639      | 0.450108    | 0.44706   | -0.0098041    | 0.980845  | 0.994152  |
| Mospd1_j3        | 3.725       | 4.16286   | 0             | 1         | 1         |
| Mospd1           | 4.44365     | 5.3739    | 0             | 1         | 1         |
| AK082553_j1      | 0.0435448   | 0.145352  | 1.73898       | 0.253421  | 1         |
| XLOC_036643      | 0.330134    | 0.199248  | -0.728486     | 0.375891  | 0.708088  |
| XLOC_036643      | 0.0331589   | 0.0811749 | 1.29164       | 0.492737  | 1         |
| Mtap7d3_j3       | 0.0278265   | 0.075834  | 1.44638       | 0.438339  | 1         |
| Fgf13_j3         | 19.5523     | 31.3802   | 0             | 1         | 1         |
| Mcf2_j3          | 0.0360996   | 0.0776549 | 1.10509       | 0.305913  | 1         |
| Atp11c_j8        | 2.22065     | 2.21247   | -0.00532372   | 0.982137  | 0.994587  |
| Atp11c_j9        | 0.689667    | 1.48864   | 1.11002       | 3.12E-07  | 1.47E-05  |
| Atp11c           | 0.839649    | 0.908722  | 0.114052      | 0.634785  | 0.858242  |
| XLOC_036664      | 0.0232764   | 0.0977286 | 2.06991       | 0.133979  | 1         |
| Cd99l2_j6        | 1.17136     | 2.63858   | 0             | 1         | 1         |
| Gabra3_j3        | 0.628322    | 1.17271   | 0             | 1         | 1         |
| Xlr4c_j3         | 0           | 0.318114  | 1.79769e+308  | 0.0236712 | 0.15814   |
| Idh3g_j3         | 1.84521     | 1.76059   | -0.0677213    | 0.609859  | 0.846292  |
| L1cam_j3         | 0           | 11.735    | 0             | 1         | 1         |
| L1cam_j2         | 30.6116     | 26.3094   | 0             | 1         | 1         |
| Flna_j5          | 4.68385     | 6.42842   | 0.456769      | 8.20E-05  | 0.0018131 |
| Flna_j6          | 0.0650152   | 0         | -1.79769e+308 | 6.66E-05  | 1         |
| Ubl4             | 0.46615     | 1.58297   | 0             | 1         | 1         |
| Gab3_j1          | 0.0327239   | 0.120806  | 1.88427       | 0.0947469 | 1         |
| Gab3_j7          | 0.000923335 | 0.122874  | 7.0561        | 0.772336  | 1         |
| F8_j4            | 0.483101    | 0.381888  | -0.339177     | 0.304993  | 0.65013   |
| XLOC_036719      | 135.002     | 204.203   | 0.597028      | 1.50E-06  | 5.89E-05  |
| Zfx_j4           | 0           | 0.0621576 | 0             | 1         | 1         |
| Arhgef9_j9       | 0           | 0.204031  | 0             | 1         | 1         |
| Las1l_j1         | 0.965993    | 1.3019    | 0.430531      | 0.244527  | 0.592073  |
| XLOC_036739      | 0.272418    | 0.422672  | 0.633714      | 0.192748  | 0.535059  |
| Ophn1_j2         | 1.4996      | 1.54019   | 0             | 1         | 1         |
| Zmym3_j2         | 2.77987     | 3.48445   | 0             | 1         | 1         |
| Phka1_j3         | 2.60777     | 2.35793   | 0             | 1         | 1         |

|                  |           |           |               |           |           |
|------------------|-----------|-----------|---------------|-----------|-----------|
| Dmrtc1a_j3       | 0.64122   | 0.77762   | 0.278245      | 0.534069  | 0.805392  |
| B230206F22Rik_j1 | 0.333906  | 0.0717586 | -2.21822      | 0.0073325 | 0.0682184 |
| B230206F22Rik_j2 | 0.0929034 | 0.129773  | 0.482192      | 0.543719  | 1         |
| B230206F22Rik_j3 | 0.117861  | 0.0984894 | -0.259046     | 0.699788  | 1         |
| 5530601H04Rik_j3 | 1.06402   | 1.21888   | 0.196026      | 0.539334  | 0.808383  |
| XLOC_036776      | 0.132937  | 0.0687306 | 0             | 1         | 1         |
| Atrx_j5          | 0.412541  | 0.516333  | 0             | 1         | 1         |
| Brwd3_j6         | 0.0253011 | 0.240128  | 3.24653       | 0.245119  | 0.592511  |
| Chm_j2           | 2.21962   | 2.46405   | 0             | 1         | 1         |
| Trmt2b_j2        | 0.439107  | 0.225559  | -0.961066     | 0.0825378 | 0.350073  |
| Zmat1_j4         | 0         | 0.180909  | 0             | 1         | 1         |
| Tceal6_j1        | 0.314353  | 0.167394  | -0.909137     | 0.295358  | 0.641977  |
| Morf4l2_j2       | 77.2896   | 77.3732   | 0             | 1         | 1         |
| Rab9b_j1         | 1.639     | 2.22278   | 0             | 1         | 1         |
| Tmsb15l_j4       | 2.27556   | 1.91041   | -0.252336     | 0.372135  | 0.705073  |
| Morc4_j2         | 0         | 0.0867728 | 1.79769e+308  | 0.0121905 | 1         |
| Morc4_j1         | 0.104864  | 0.139418  | 0.410901      | 0.528539  | 1         |
| Rbm41_j2         | 0         | 0.0721284 | 1.79769e+308  | 0.010865  | 1         |
| Chrdl1_j1        | 8.70E-05  | 0.0913476 | 10.0365       | 0.91126   | 1         |
| XLOC_036841      | 0.105066  | 0.168921  | 0.685045      | 0.518964  | 0.796737  |
| Lhfp1_j4         | 8.27597   | 4.98926   | 0             | 1         | 1         |
| Lrch2_j5         | 0.577523  | 0.486239  | 0             | 1         | 1         |
| Maged2_j1        | 5.97047   | 8.4846    | 0             | 1         | 1         |
| Gpr173_j4        | 3.54294   | 3.46702   | -0.0312519    | 0.831959  | 0.945814  |
| Gpr173_j5        | 1.21874   | 0.512438  | -1.24994      | 0.0006429 | 0.0100148 |
| Sms_j2           | 0.085493  | 0.106343  | 0.314852      | 0.848252  | 1         |
| Ppef1_j3         | 1.31197   | 2.48728   | 0             | 1         | 1         |
| Reps2_j2         | 0.465787  | 0.534736  | 0             | 1         | 1         |
| Car5b_j2         | 0.0367705 | 0.321707  | 3.12913       | 0.0035282 | 0.0391803 |
| Ofd1_j1          | 0.714984  | 0.998549  | 0             | 1         | 1         |
| Frmpd4_j2        | 1.38193   | 0.573753  | -1.26818      | 7.13E-09  | 5.11E-07  |
| Hccs_j1          | 6.87457   | 5.81655   | -0.241105     | 0.103766  | 0.399525  |
| Ube1y1_j1        | 0.0810957 | 0         | -1.79769e+308 | 0.0079321 | 1         |
| Smcy_j1          | 0.134296  | 0.0341616 | -1.97497      | 0.0102686 | 1         |
| Kdm5d            | 0.174674  | 0.144351  | -0.275087     | 0.509618  | 0.790813  |
| Smcy_j6          | 0.271888  | 0.32291   | 0.24812       | 0.428898  | 0.742566  |
| Eif2s3y_j3       | 4.59962   | 4.38155   | 0             | 1         | 1         |
| Eif2s3y          | 5.56011   | 4.82921   | 0             | 1         | 1         |
| Eif2s3y_j4       | 2.62988   | 2.40078   | 0             | 1         | 1         |
| Rbmy1a1_j2       | 0.290436  | 0.719106  | 1.30798       | 0.018708  | 0.134696  |
| Rbmy1a1_j4       | 0.202643  | 0.45327   | 1.16143       | 0.163718  | 0.499207  |
| Rbmy1a1_j5       | 0.267363  | 0.59693   | 1.15876       | 0.0004026 | 0.0068103 |
| Uty_j12          | 0.127346  | 0.103639  | 0             | 1         | 1         |
| Ddx3x_j3         | 0.173251  | 0         | 0             | 1         | 1         |
| Ddx3y            | 6.93829   | 4.11665   | 0             | 1         | 1         |
| Eif2s3y_j1       | 2.69111   | 3.06003   | 0             | 1         | 1         |
| Eif2s3y_j2       | 2.21871   | 2.28001   | 0             | 1         | 1         |



|             |           |                        |           |          |           |
|-------------|-----------|------------------------|-----------|----------|-----------|
| XLOC_037363 | 0.233835  | 0                      | 0         | 1        | 1         |
| Uty_j1      | 0.927791  | 0.893479               | 0         | 1        | 1         |
| Ddx3x_j1    | 3.31134   | 3.34144                | 0         | 1        | 1         |
| Smcy_j2     | 0.0615491 | 0 -1.79769e+308        | 0.0003043 |          | 1         |
| XLOC_037361 | 0.733937  | 0.46531                | 0         | 1        | 1         |
| Uty_j11     | 1.31253   | 1.05073                | 0         | 1        | 1         |
| Smcy_j3     | 0         | 0.0580533 1.79769e+308 | 0.0087435 |          | 1         |
| Smcy_j4     | 0.460685  | 0.476037               | 0.0472946 | 0.877575 | 0.96086   |
| Rbmy1a1_j1  | 0.0897025 | 0.384899               | 2.10126   | 4.65E-05 | 0.0011235 |
| Uty_j3      | 0.143957  | 0.101389               | 0         | 1        | 1         |
| Uty_j2      | 0.54695   | 0.561065               | 0         | 1        | 1         |
| Ddx3x_j5    | 0.0651228 | 0.0704416              | 0         | 1        | 1         |
| Smcy_j7     | 0.518368  | 0.650117               | 0.326724  | 0.263081 | 0.611936  |
| Uty_j6      | 0         | 0.0525469              | 0         | 1        | 1         |
| Uty_j9      | 0         | 0.0561917              | 0         | 1        | 1         |
| Uty         | 0.373398  | 0.110938               | 0         | 1        | 1         |
| Ddx3x_j2    | 0         | 0.256431               | 0         | 1        | 1         |
| Ube1y1_j2   | 0.0209194 | 0.0903409              | 2.11054   | 0.317444 | 1         |
| Smcy_j5     | 0.852154  | 0.747694               | -0.188666 | 0.433303 | 0.744724  |
| Eif2s3y_j5  | 0.0111227 | 0.632537               | 0         | 1        | 1         |
| XLOC_037363 | 0.520952  | 0.594358               | 0         | 1        | 1         |
| Uty_j7      | 0.0546394 | 0.0717986              | 0         | 1        | 1         |
| Uty_j10     | 1.17834   | 1.00312                | 0         | 1        | 1         |
| Ddx3x_j4    | 0.273773  | 0.257215               | 0         | 1        | 1         |
