# Supplementary material
Source: PubMed Central journal article supplement (PMC5864114)
Supplement: NIHMS942947-supplement-Supp_TableS8.pdf [file NIHMS942947-supplement-Supp_TableS8.pdf]

**Table S8:**

| <b>TRACKING ID</b> | <b>GENE NAME</b>     | <b>Control FPKM</b> | <b>Crushed FPKM</b> |
|--------------------|----------------------|---------------------|---------------------|
| TCONS_00088184     | <b>Acot7_j2_1</b>    | 13.1534             | 0                   |
| TCONS_00089052     | <b>C1qc_j1</b>       | 7.46897             | 18.8568             |
| TCONS_00084418     | <b>Car3_j1_1</b>     | 4.04021             | 31.3693             |
| TCONS_00012773     | <b>Cd24a_j3</b>      | 3.90998             | 1.39971             |
| TCONS_00106926     | <b>Chchd3_j2_1</b>   | 8.10276             | 0                   |
| TCONS_00008160     | <b>Dbi_j5_1</b>      | 31.7117             | 5.99319             |
| TCONS_00026271     | <b>Dync1h1_j11_1</b> | 13.0402             | 35.6388             |
| TCONS_00024418     | <b>Egfr_j2_1</b>     | 0.073782            | 0.452875            |
| TCONS_00020769     | <b>Gaa_j2_1</b>      | 3.61482             | 11.5665             |
| TCONS_00008078     | <b>ldh1_j2</b>       | 4.30096             | 14.299              |
| TCONS_00083972     | <b>Lrig2_j2_1</b>    | 0.919029            | 0.097754            |
| TCONS_00135279     | <b>Lrrc49_j3</b>     | 93.8651             | 46.8669             |
| TCONS_00136628     | <b>Lrrc49_j5</b>     | 1.64261             | 12.8108             |
| TCONS_00019429     | <b>Nme1_j1_1</b>     | 11.4845             | 0                   |
| TCONS_00101566     | <b>Orc5_j1</b>       | 4.43071             | 0.896373            |
| TCONS_00062981     | <b>Paip2_j1</b>      | 5.24848             | 10.945              |
| TCONS_00051917     | <b>Ppp1r2_j3</b>     | 2.951               | 0.974501            |
| TCONS_00083479     | <b>S100a6_j3</b>     | 185.484             | 89.1725             |
| TCONS_00025727     | <b>Sdc1_j1_1</b>     | 13.2647             | 29.7917             |
| TCONS_00033131     | <b>Serpib1a_j1_1</b> | 5.07049             | 12.2912             |
| TCONS_00072605     | <b>Stxbp1_j1</b>     | 0                   | 11.8834             |
| TCONS_00125697     | <b>Vps35_j1</b>      | 4.11761             | 1.38978             |
| TCONS_00113864     | <b>Vstm2b_j4</b>     | 4.85319             | 1.4324              |
