# Supplementary material
Source: PubMed Central journal article supplement (PMC5864114)
Supplement: NIHMS942947-supplement-Supp_TableS9.pdf [file NIHMS942947-supplement-Supp_TableS9.pdf]

Table S9.

|                  | <b>FC RNASeq</b> | <b>FC RT-PCR (Canx)</b> | <b>FC RT-PCR (Psemb2)</b> |
|------------------|------------------|-------------------------|---------------------------|
| <b>Ccl7</b>      | 1.72229          | 2.92                    | 1.997                     |
| <b>Ccl8</b>      | 2.06465          | 3.09                    | 2.16                      |
| <b>Fcgr2b</b>    | 1.74007          | 2.07                    | 0.78                      |
| <b>Paip2_j1</b>  | 1.06029          | 1.055                   | 0.70                      |
| <b>Pigz_j1</b>   | -2.08473         | -0.63                   | -1.61                     |
| <b>Lrrc49_j3</b> | -1.00202         | -1.16                   | -1.68                     |
| <b>Ppp1r2_j3</b> | -1.59847         | -1.397                  | -1.92                     |
| <b>Cd24a_j3</b>  | -1.48204         | -0.605                  | -0.96                     |
|                  |                  |                         |                           |
| <b>PEARSON</b>   |                  | 0.94                    | 0.95                      |
| <b>R2</b>        |                  | 0.89                    | 0.90                      |
| <b>p-value</b>   |                  | 0.0004                  | 0.0003                    |
|                  |                  |                         |                           |
| <b>KENDALL</b>   |                  | 0.71                    | 0.71                      |
| <b>p-value</b>   |                  | 0.01874                 | 0.01874                   |
