# Supplementary material
Source: PubMed Central journal article supplement (PMC5864114)
Supplement: NIHMS942947-supplement-Supp_TableS10.pdf [file NIHMS942947-supplement-Supp_TableS10.pdf]

Table S10

| Tracking_ID    | Gene.ID          | Mirbase.ID      | context.scores |
|----------------|------------------|-----------------|----------------|
| TCONS_00000043 | AK080352_j1      | mmu-miR-298-5p  | -0.233         |
| TCONS_00000043 | AK080352_j1      | mmu-miR-544-3p  | -0.096         |
| TCONS_00000043 | AK080352_j1      | mmu-miR-466d-5p | -0.179         |
| TCONS_00000043 | AK080352_j1      | mmu-miR-154-3p  | -0.167         |
| TCONS_00000043 | AK080352_j1      | mmu-miR-299-3p  | -0.034         |
| TCONS_00000288 | Mtap2_j1         | mmu-miR-29b-3p  | -0.082         |
| TCONS_00000307 | Igfbp2_j3        | mmu-miR-544-3p  | -0.055         |
| TCONS_00000465 | Sned1_j5         | mmu-miR-466d-5p | -2.87          |
| TCONS_00000465 | Sned1_j5         | mmu-miR-29b-3p  | -0.212         |
| TCONS_00000465 | Sned1_j5         | mmu-miR-299-3p  | -0.091         |
| TCONS_00000470 | Ano7_j1          | mmu-miR-298-5p  | -0.3           |
| TCONS_00000522 | Cntnap5a_j1      | mmu-miR-544-3p  | -0.01          |
| TCONS_00000522 | Cntnap5a_j1      | mmu-miR-466d-5p | -0.102         |
| TCONS_00000522 | Cntnap5a_j1      | rno-let-7f-1*   | -0.21          |
| TCONS_00000522 | Cntnap5a_j1      | mmu-let-7a-1-3p | -0.191         |
| TCONS_00000573 | Lemd1            | mmu-miR-299-3p  | -0.003         |
| TCONS_00000573 | Lemd1            | mmu-miR-298-5p  | -0.073         |
| TCONS_00000573 | Lemd1            | mmu-miR-544-3p  | -0.047         |
| TCONS_00000573 | Lemd1            | mmu-miR-29b-3p  | -0.478         |
| TCONS_00000617 | Rabif_j1         | mmu-miR-298-5p  | -0.023         |
| TCONS_00000617 | Rabif_j1         | mmu-miR-29b-3p  | -0.084         |
| TCONS_00000660 | B3galt2          | mmu-miR-467b-5p | -0.109         |
| TCONS_00000660 | B3galt2          | mmu-miR-466d-5p | -0.071         |
| TCONS_00000660 | B3galt2          | mmu-miR-9-3p    | -0.114         |
| TCONS_00000759 | Slc19a2_j1       | mmu-miR-298-5p  | -0.07          |
| TCONS_00000759 | Slc19a2_j1       | mmu-miR-29b-3p  | -0.12          |
| TCONS_00000759 | Slc19a2_j1       | mmu-miR-544-3p  | -0.372         |
| TCONS_00000862 | Efcab2_j6        | mmu-miR-466d-5p | -0.125         |
| TCONS_00000862 | Efcab2_j6        | mmu-miR-299-3p  | -0.025         |
| TCONS_00000862 | Efcab2_j6        | rno-let-7f-1*   | -0.258         |
| TCONS_00000862 | Efcab2_j6        | mmu-miR-19b-3p  | -0.002         |
| TCONS_00000862 | Efcab2_j6        | mmu-let-7a-1-3p | -0.279         |
| TCONS_00000862 | Efcab2_j6        | mmu-miR-298-5p  | -0.029         |
| TCONS_00000862 | Efcab2_j6        | mmu-miR-9-3p    | -0.029         |
| TCONS_00000975 | A330023F24Rik_j9 | rno-let-7f-1*   | -0.049         |
| TCONS_00000975 | A330023F24Rik_j9 | mmu-miR-9-3p    | -0.03          |
| TCONS_00000975 | A330023F24Rik_j9 | mmu-miR-154-3p  | -0.166         |
| TCONS_00000975 | A330023F24Rik_j9 | mmu-let-7a-1-3p | -0.049         |
| TCONS_00001167 | Nabp1_j3         | rno-let-7f-1*   | -0.051         |
| TCONS_00001167 | Nabp1_j3         | mmu-let-7a-1-3p | -0.032         |
| TCONS_00001185 | XLOC_000678      | mmu-miR-466d-5p | -0.185         |
| TCONS_00001185 | XLOC_000678      | mmu-miR-9-3p    | -0.156         |
| TCONS_00001193 | Pgap1            | mmu-miR-466d-5p | -0.203         |
| TCONS_00001193 | Pgap1            | mmu-miR-19b-3p  | -0.02          |

|                |             |                 |        |
|----------------|-------------|-----------------|--------|
| TCONS_00001193 | Pgap1       | mmu-miR-299-3p  | -0.067 |
| TCONS_00001193 | Pgap1       | mmu-miR-29b-3p  | -0.314 |
| TCONS_00001193 | Pgap1       | mmu-miR-298-5p  | -0.145 |
| TCONS_00001374 | Ecel1_j1    | mmu-miR-299-3p  | -0.087 |
| TCONS_00001375 | Ecel1_j12   | mmu-miR-467b-5p | -0.026 |
| TCONS_00001440 | Bcl2        | mmu-miR-299-3p  | -0.016 |
| TCONS_00001440 | Bcl2        | rno-let-7f-1*   | -0.018 |
| TCONS_00001440 | Bcl2        | mmu-miR-466d-5p | -7.75  |
| TCONS_00001547 | Zc3h11a_j6  | rno-let-7f-1*   | -0.133 |
| TCONS_00001547 | Zc3h11a_j6  | mmu-miR-467b-5p | -0.128 |
| TCONS_00001547 | Zc3h11a_j6  | mmu-miR-154-3p  | -0.214 |
| TCONS_00001547 | Zc3h11a_j6  | mmu-let-7a-1-3p | -0.105 |
| TCONS_00001547 | Zc3h11a_j6  | mmu-miR-9-3p    | -0.303 |
| TCONS_00001600 | Hmcn1_j4    | rno-let-7f-1*   | -0.039 |
| TCONS_00001600 | Hmcn1_j4    | mmu-miR-29b-3p  | -0.269 |
| TCONS_00001600 | Hmcn1_j4    | mmu-let-7a-1-3p | -0.067 |
| TCONS_00001600 | Hmcn1_j4    | mmu-miR-154-3p  | -0.116 |
| TCONS_00001662 | Rasal2_j6   | mmu-miR-544-3p  | -0.181 |
| TCONS_00001662 | Rasal2_j6   | mmu-miR-467b-5p | -0.259 |
| TCONS_00001662 | Rasal2_j6   | mmu-miR-29b-3p  | -0.118 |
| TCONS_00001662 | Rasal2_j6   | mmu-miR-298-5p  | -0.069 |
| TCONS_00001691 | AK181631_j2 | mmu-miR-154-3p  | -0.255 |
| TCONS_00001726 | Rcsd1       | mmu-miR-544-3p  | -0.068 |
| TCONS_00001726 | Rcsd1       | mmu-miR-298-5p  | -0.142 |
| TCONS_00001763 | Fcgr2b      | mmu-miR-299-3p  | -0.075 |
| TCONS_00001849 | Enah_j1     | mmu-miR-299-3p  | -0.021 |
| TCONS_00001849 | Enah_j1     | mmu-miR-19b-3p  | -0.073 |
| TCONS_00001867 | Tgfb2_j2    | mmu-miR-154-3p  | -0.161 |
| TCONS_00001867 | Tgfb2_j2    | mmu-miR-298-5p  | -0.034 |
| TCONS_00001867 | Tgfb2_j2    | mmu-miR-29b-3p  | -0.423 |
| TCONS_00001867 | Tgfb2_j2    | mmu-miR-466d-5p | -2.17  |
| TCONS_00001874 | Kctd3_j3    | mmu-miR-29b-3p  | -0.151 |
| TCONS_00002430 | Lypla1_j1   | mmu-miR-29b-3p  | -0.196 |
| TCONS_00002430 | Lypla1_j1   | mmu-miR-467b-5p | -0.038 |
| TCONS_00002622 | Vwc2l_j2    | mmu-miR-9-3p    | -0.05  |
| TCONS_00002622 | Vwc2l_j2    | mmu-miR-19b-3p  | -0.077 |
| TCONS_00002622 | Vwc2l_j2    | mmu-miR-299-3p  | -0.01  |
| TCONS_00002622 | Vwc2l_j2    | mmu-miR-298-5p  | -0.2   |
| TCONS_00002622 | Vwc2l_j2    | mmu-miR-466d-5p | -0.059 |
| TCONS_00002632 | Smarcal1_j1 | mmu-miR-9-3p    | -0.178 |
| TCONS_00002632 | Smarcal1_j1 | mmu-miR-299-3p  | -0.143 |
| TCONS_00002632 | Smarcal1_j1 | mmu-miR-298-5p  | -0.073 |
| TCONS_00002674 | Sgpp2_j2    | mmu-miR-298-5p  | -0.125 |
| TCONS_00002674 | Sgpp2_j2    | mmu-miR-299-3p  | -0.04  |
| TCONS_00002674 | Sgpp2_j2    | mmu-miR-466d-5p | -0.001 |
| TCONS_00002674 | Sgpp2_j2    | mmu-miR-154-3p  | -0.215 |
| TCONS_00002674 | Sgpp2_j2    | mmu-miR-9-3p    | -0.17  |

|                |               |                 |        |
|----------------|---------------|-----------------|--------|
| TCONS_00002678 | 9430031J16Rik | mmu-miR-544-3p  | -0.058 |
| TCONS_00002678 | 9430031J16Rik | mmu-miR-19b-3p  | -0.311 |
| TCONS_00002678 | 9430031J16Rik | mmu-miR-467b-5p | -0.064 |
| TCONS_00002678 | 9430031J16Rik | mmu-miR-9-3p    | -0.017 |
| TCONS_00002836 | Glrx2_j1      | mmu-miR-298-5p  | -0.127 |
| TCONS_00002839 | lvns1abp      | mmu-miR-19b-3p  | -0.325 |
| TCONS_00003002 | Batf3         | mmu-miR-19b-3p  | -0.208 |
| TCONS_00003061 | Trpa1_j1      | mmu-miR-544-3p  | -0.098 |
| TCONS_00003061 | Trpa1_j1      | mmu-let-7a-1-3p | -0.181 |
| TCONS_00003061 | Trpa1_j1      | rno-let-7f-1*   | -0.139 |
| TCONS_00003277 | Ecel1         | mmu-miR-467b-5p | -0.026 |
| TCONS_00003310 | Pign_j3       | rno-let-7f-1*   | -0.018 |
| TCONS_00003310 | Pign_j3       | mmu-miR-29b-3p  | -0.038 |
| TCONS_00003310 | Pign_j3       | mmu-miR-466d-5p | -1.69  |
| TCONS_00003310 | Pign_j3       | mmu-miR-298-5p  | -0.093 |
| TCONS_00003310 | Pign_j3       | mmu-miR-19b-3p  | -0.24  |
| TCONS_00003310 | Pign_j3       | mmu-let-7a-1-3p | -0.018 |
| TCONS_00003382 | Prelp_j1      | mmu-miR-29b-3p  | -0.238 |
| TCONS_00003382 | Prelp_j1      | mmu-miR-466d-5p | -0.39  |
| TCONS_00003382 | Prelp_j1      | mmu-miR-298-5p  | -0.549 |
| TCONS_00003437 | Qsox1_j1      | mmu-miR-299-3p  | -0.147 |
| TCONS_00003447 | Soat1_j2      | mmu-miR-29b-3p  | -0.088 |
| TCONS_00003447 | Soat1_j2      | mmu-miR-466d-5p | -0.029 |
| TCONS_00003447 | Soat1_j2      | mmu-miR-299-3p  | -0.194 |
| TCONS_00004049 | Plekxb2_j2    | mmu-miR-467b-5p | -0.081 |
| TCONS_00004092 | Tmem194b_j1   | mmu-miR-9-3p    | -0.054 |
| TCONS_00004092 | Tmem194b_j1   | mmu-miR-29b-3p  | -0.125 |
| TCONS_00004092 | Tmem194b_j1   | mmu-miR-298-5p  | -0.044 |
| TCONS_00004092 | Tmem194b_j1   | mmu-miR-466d-5p | -0.061 |
| TCONS_00004115 | Cflar_j8      | mmu-miR-29b-3p  | -0.076 |
| TCONS_00004115 | Cflar_j8      | mmu-let-7a-1-3p | -0.059 |
| TCONS_00004115 | Cflar_j8      | mmu-miR-466d-5p | -0.622 |
| TCONS_00004115 | Cflar_j8      | mmu-miR-19b-3p  | -0.122 |
| TCONS_00004115 | Cflar_j8      | rno-let-7f-1*   | -0.089 |
| TCONS_00004208 | Sp100_j6      | mmu-miR-298-5p  | -0.351 |
| TCONS_00004265 | Zcchc2_j2     | mmu-miR-19b-3p  | -0.073 |
| TCONS_00004265 | Zcchc2_j2     | mmu-miR-9-3p    | -0.23  |
| TCONS_00004266 | Zcchc2_j3     | mmu-miR-9-3p    | -0.23  |
| TCONS_00004266 | Zcchc2_j3     | mmu-miR-19b-3p  | -0.073 |
| TCONS_00004368 | Abl2_j2       | mmu-miR-544-3p  | -0.183 |
| TCONS_00004368 | Abl2_j2       | mmu-miR-467b-5p | -0.182 |
| TCONS_00004368 | Abl2_j2       | mmu-miR-19b-3p  | -0.066 |
| TCONS_00004368 | Abl2_j2       | mmu-miR-298-5p  | -0.083 |
| TCONS_00004479 | Gpatch2_j1    | mmu-miR-299-3p  | -0.186 |
| TCONS_00004528 | Sntg1_j2      | mmu-miR-544-3p  | -0.444 |
| TCONS_00004528 | Sntg1_j2      | mmu-miR-466d-5p | -0.158 |
| TCONS_00004528 | Sntg1_j2      | mmu-miR-9-3p    | -0.113 |

|                |            |                 |        |
|----------------|------------|-----------------|--------|
| TCONS_00004567 | Col19a1_j1 | mmu-miR-19b-3p  | -0.003 |
| TCONS_00004567 | Col19a1_j1 | mmu-miR-29b-3p  | -0.201 |
| TCONS_00004567 | Col19a1_j1 | mmu-miR-544-3p  | -0.319 |
| TCONS_00004567 | Col19a1_j1 | mmu-miR-466d-5p | -0.005 |
| TCONS_00004631 | Gtf3c3_j1  | mmu-miR-154-3p  | -0.207 |
| TCONS_00004631 | Gtf3c3_j1  | mmu-miR-298-5p  | -0.178 |
| TCONS_00004631 | Gtf3c3_j1  | rno-let-7f-1*   | -0.097 |
| TCONS_00004631 | Gtf3c3_j1  | mmu-let-7a-1-3p | -0.097 |
| TCONS_00004631 | Gtf3c3_j1  | mmu-miR-19b-3p  | -0.052 |
| TCONS_00004633 | Ankrd44_j4 | mmu-miR-299-3p  | -0.24  |
| TCONS_00004633 | Ankrd44_j4 | mmu-miR-298-5p  | -0.038 |
| TCONS_00004633 | Ankrd44_j4 | mmu-miR-544-3p  | -0.077 |
| TCONS_00004633 | Ankrd44_j4 | rno-let-7f-1*   | -0.021 |
| TCONS_00004633 | Ankrd44_j4 | mmu-let-7a-1-3p | -0.003 |
| TCONS_00004633 | Ankrd44_j4 | mmu-miR-19b-3p  | -0.032 |
| TCONS_00004701 | Slc19a3_j1 | mmu-miR-299-3p  | -0.106 |
| TCONS_00004701 | Slc19a3_j1 | mmu-miR-29b-3p  | -0.631 |
| TCONS_00004716 | Ecel1_j11  | mmu-miR-467b-5p | -0.015 |
| TCONS_00004750 | Pign_j10   | mmu-let-7a-1-3p | -0.031 |
| TCONS_00004750 | Pign_j10   | mmu-miR-466d-5p | -0.042 |
| TCONS_00004750 | Pign_j10   | mmu-miR-29b-3p  | -0.251 |
| TCONS_00004750 | Pign_j10   | mmu-miR-298-5p  | -0.093 |
| TCONS_00004750 | Pign_j10   | rno-let-7f-1*   | -0.031 |
| TCONS_00004791 | Cd55_j2    | mmu-let-7a-1-3p | -0.189 |
| TCONS_00004791 | Cd55_j2    | rno-let-7f-1*   | -0.147 |
| TCONS_00005405 | Rpl31_j2   | mmu-miR-544-3p  | -0.188 |
| TCONS_00005420 | Nck2_j1    | mmu-miR-466d-5p | -0.437 |
| TCONS_00005420 | Nck2_j1    | mmu-miR-298-5p  | -0.137 |
| TCONS_00005452 | Cflar_j7   | mmu-miR-29b-3p  | -0.076 |
| TCONS_00005452 | Cflar_j7   | mmu-miR-466d-5p | -0.623 |
| TCONS_00005452 | Cflar_j7   | mmu-miR-19b-3p  | -0.122 |
| TCONS_00005452 | Cflar_j7   | mmu-let-7a-1-3p | -0.059 |
| TCONS_00005452 | Cflar_j7   | rno-let-7f-1*   | -0.089 |
| TCONS_00005509 | Rhbdd1_j2  | mmu-miR-466d-5p | -0.568 |
| TCONS_00005509 | Rhbdd1_j2  | mmu-miR-9-3p    | -0.251 |
| TCONS_00005509 | Rhbdd1_j2  | mmu-miR-467b-5p | -0.037 |
| TCONS_00005527 | Efhd1_j1   | mmu-miR-298-5p  | -0.194 |
| TCONS_00005657 | Tnr        | mmu-miR-466d-5p | -3.98  |
| TCONS_00005657 | Tnr        | mmu-miR-544-3p  | -0.038 |
| TCONS_00005677 | Illdr2_j4  | mmu-miR-467b-5p | -0.003 |
| TCONS_00005677 | Illdr2_j4  | mmu-miR-299-3p  | -0.021 |
| TCONS_00005677 | Illdr2_j4  | mmu-miR-29b-3p  | -0.058 |
| TCONS_00005677 | Illdr2_j4  | mmu-miR-544-3p  | -0.06  |
| TCONS_00005688 | Arhgap30   | mmu-miR-544-3p  | -0.144 |
| TCONS_00005688 | Arhgap30   | mmu-miR-298-5p  | -0.089 |
| TCONS_00005702 | Pyhin1     | mmu-miR-9-3p    | -0.143 |
| TCONS_00005702 | Pyhin1     | mmu-miR-299-3p  | -0.152 |

|                |             |                 |        |
|----------------|-------------|-----------------|--------|
| TCONS_00005702 | Pyhin1      | mmu-miR-467b-5p | -0.201 |
| TCONS_00005786 | Slco5a1     | mmu-miR-29b-3p  | -0.294 |
| TCONS_00005786 | Slco5a1     | mmu-miR-544-3p  | -0.16  |
| TCONS_00005786 | Slco5a1     | mmu-miR-467b-5p | -0.051 |
| TCONS_00005814 | Prim2_j2    | rno-let-7f-1*   | -0.22  |
| TCONS_00005814 | Prim2_j2    | mmu-miR-466d-5p | -1.04  |
| TCONS_00005814 | Prim2_j2    | mmu-let-7a-1-3p | -0.231 |
| TCONS_00005825 | Ankrd23_j3  | mmu-miR-466d-5p | -0.123 |
| TCONS_00005946 | Serpine2_j1 | mmu-miR-299-3p  | -0.191 |
| TCONS_00005965 | Per2_j3     | mmu-miR-298-5p  | -0.133 |
| TCONS_00006004 | Dbi_j2      | mmu-miR-298-5p  | -0.256 |
| TCONS_00006056 | Igfn1_j2    | mmu-miR-544-3p  | -0.047 |
| TCONS_00006121 | Pou2f1_j1   | mmu-miR-298-5p  | -0.069 |
| TCONS_00006121 | Pou2f1_j1   | mmu-miR-466d-5p | -0.008 |
| TCONS_00006121 | Pou2f1_j1   | mmu-miR-9-3p    | -0.052 |
| TCONS_00006121 | Pou2f1_j1   | mmu-miR-544-3p  | -0.003 |
| TCONS_00006585 | Aox1_j5     | mmu-miR-19b-3p  | -0.2   |
| TCONS_00006603 | Nbeal1_j4   | mmu-let-7a-1-3p | -0.24  |
| TCONS_00006603 | Nbeal1_j4   | mmu-miR-154-3p  | -0.101 |
| TCONS_00006603 | Nbeal1_j4   | rno-let-7f-1*   | -0.218 |
| TCONS_00006603 | Nbeal1_j4   | mmu-miR-19b-3p  | -0.283 |
| TCONS_00006603 | Nbeal1_j4   | mmu-miR-466d-5p | -0.352 |
| TCONS_00006649 | Mrpl44_j1   | mmu-let-7a-1-3p | -0.05  |
| TCONS_00006649 | Mrpl44_j1   | rno-let-7f-1*   | -0.054 |
| TCONS_00006744 | Fam5c       | mmu-miR-466d-5p | -0.132 |
| TCONS_00006976 | Fam126b_j6  | mmu-let-7a-1-3p | -0.067 |
| TCONS_00006976 | Fam126b_j6  | mmu-miR-466d-5p | -0.035 |
| TCONS_00006976 | Fam126b_j6  | mmu-miR-544-3p  | -0.378 |
| TCONS_00006976 | Fam126b_j6  | mmu-miR-299-3p  | -0.012 |
| TCONS_00006976 | Fam126b_j6  | rno-let-7f-1*   | -0.077 |
| TCONS_00006976 | Fam126b_j6  | mmu-miR-29b-3p  | -0.165 |
| TCONS_00006976 | Fam126b_j6  | mmu-miR-154-3p  | -0.171 |
| TCONS_00007040 | Ecel1_j4    | mmu-miR-467b-5p | -0.015 |
| TCONS_00007040 | Ecel1_j4    | mmu-miR-299-3p  | -0.089 |
| TCONS_00007041 | Ecel1_j8    | mmu-miR-467b-5p | -0.015 |
| TCONS_00007170 | Rasal2_j1   | mmu-miR-298-5p  | -0.069 |
| TCONS_00007170 | Rasal2_j1   | mmu-miR-467b-5p | -0.255 |
| TCONS_00007170 | Rasal2_j1   | mmu-miR-544-3p  | -0.176 |
| TCONS_00007170 | Rasal2_j1   | mmu-miR-29b-3p  | -0.115 |
| TCONS_00007243 | Ahctf1_j4   | mmu-miR-544-3p  | -0.235 |
| TCONS_00007243 | Ahctf1_j4   | mmu-miR-29b-3p  | -0.042 |
| TCONS_00007243 | Ahctf1_j4   | mmu-miR-298-5p  | -0.066 |
| TCONS_00007924 | Ints7       | mmu-miR-9-3p    | -0.017 |
| TCONS_00007924 | Ints7       | mmu-miR-298-5p  | -0.508 |
| TCONS_00008150 | Cdh19_j4    | rno-let-7f-1*   | -0.034 |
| TCONS_00008150 | Cdh19_j4    | mmu-miR-19b-3p  | -0.171 |
| TCONS_00008150 | Cdh19_j4    | mmu-let-7a-1-3p | -0.03  |

|                |               |                 |        |
|----------------|---------------|-----------------|--------|
| TCONS_00008155 | Epb4.1l5_j1   | mmu-miR-298-5p  | -0.159 |
| TCONS_00008155 | Epb4.1l5_j1   | mmu-miR-19b-3p  | -0.053 |
| TCONS_00008241 | Soat1_j1      | mmu-miR-29b-3p  | -0.088 |
| TCONS_00008241 | Soat1_j1      | mmu-miR-466d-5p | -0.029 |
| TCONS_00008241 | Soat1_j1      | mmu-miR-299-3p  | -0.194 |
| TCONS_00008246 | Rasal2_j3     | mmu-miR-544-3p  | -0.179 |
| TCONS_00008246 | Rasal2_j3     | mmu-miR-298-5p  | -0.069 |
| TCONS_00008246 | Rasal2_j3     | mmu-miR-29b-3p  | -0.117 |
| TCONS_00008246 | Rasal2_j3     | mmu-miR-467b-5p | -0.258 |
| TCONS_00008307 | Adss_j2       | mmu-miR-19b-3p  | -0.369 |
| TCONS_00008307 | Adss_j2       | rno-let-7f-1*   | -0.129 |
| TCONS_00008307 | Adss_j2       | mmu-let-7a-1-3p | -0.15  |
| TCONS_00008307 | Adss_j2       | mmu-miR-298-5p  | -0.346 |
| TCONS_00008616 | Rgs17_j1      | mmu-miR-466d-5p | -0.102 |
| TCONS_00008616 | Rgs17_j1      | mmu-miR-154-3p  | -0.029 |
| TCONS_00008616 | Rgs17_j1      | mmu-miR-298-5p  | -0.035 |
| TCONS_00008616 | Rgs17_j1      | mmu-miR-9-3p    | -0.086 |
| TCONS_00008788 | Cd164_j3      | mmu-miR-544-3p  | -0.106 |
| TCONS_00008788 | Cd164_j3      | mmu-miR-299-3p  | -0.178 |
| TCONS_00008802 | Cd24a_j2      | mmu-miR-466d-5p | -0.195 |
| TCONS_00008802 | Cd24a_j2      | mmu-miR-9-3p    | -0.065 |
| TCONS_00008863 | 4632428N05Rik | mmu-miR-29b-3p  | -0.003 |
| TCONS_00009014 | Arid3a        | mmu-miR-299-3p  | -0.094 |
| TCONS_00009014 | Arid3a        | mmu-miR-19b-3p  | -0.057 |
| TCONS_00009113 | Hcfc2_j1      | mmu-miR-467b-5p | -0.119 |
| TCONS_00009113 | Hcfc2_j1      | mmu-miR-19b-3p  | -0.053 |
| TCONS_00009113 | Hcfc2_j1      | mmu-miR-298-5p  | -0.007 |
| TCONS_00009113 | Hcfc2_j1      | mmu-miR-29b-3p  | -0.243 |
| TCONS_00009113 | Hcfc2_j1      | rno-let-7f-1*   | -0.045 |
| TCONS_00009113 | Hcfc2_j1      | mmu-miR-2137    | -0.347 |
| TCONS_00009113 | Hcfc2_j1      | mmu-let-7a-1-3p | -0.024 |
| TCONS_00009132 | XLOC_002469   | mmu-miR-29b-3p  | -0.116 |
| TCONS_00009132 | XLOC_002469   | mmu-miR-298-5p  | -0.296 |
| TCONS_00009357 | Tmem194_j1    | mmu-miR-19b-3p  | -0.125 |
| TCONS_00009357 | Tmem194_j1    | mmu-miR-298-5p  | -0.087 |
| TCONS_00009357 | Tmem194_j1    | mmu-miR-299-3p  | -0.03  |
| TCONS_00009383 | Pan2_j2       | mmu-miR-29b-3p  | -0.447 |
| TCONS_00009383 | Pan2_j2       | mmu-miR-544-3p  | -0.003 |
| TCONS_00009383 | Pan2_j2       | mmu-miR-466d-5p | -0.139 |
| TCONS_00009484 | Tnfaip3       | mmu-miR-19b-3p  | -0.383 |
| TCONS_00009484 | Tnfaip3       | mmu-miR-298-5p  | -0.118 |
| TCONS_00009495 | Tbpl1_j2      | rno-let-7f-1*   | -0.056 |
| TCONS_00009495 | Tbpl1_j2      | mmu-miR-154-3p  | -0.031 |
| TCONS_00009495 | Tbpl1_j2      | mmu-let-7a-1-3p | -0.066 |
| TCONS_00009495 | Tbpl1_j2      | mmu-miR-544-3p  | -0.082 |
| TCONS_00009495 | Tbpl1_j2      | mmu-miR-9-3p    | -0.046 |
| TCONS_00009495 | Tbpl1_j2      | mmu-miR-19b-3p  | -0.062 |

|                |            |                 |        |
|----------------|------------|-----------------|--------|
| TCONS_00009627 | Man1a      | mmu-miR-544-3p  | -0.071 |
| TCONS_00009627 | Man1a      | mmu-miR-467b-5p | -0.108 |
| TCONS_00009627 | Man1a      | mmu-miR-299-3p  | -0.063 |
| TCONS_00009627 | Man1a      | mmu-let-7a-1-3p | -0.01  |
| TCONS_00009627 | Man1a      | rno-let-7f-1*   | -0.007 |
| TCONS_00009648 | Unc5b      | mmu-miR-298-5p  | -0.28  |
| TCONS_00009648 | Unc5b      | mmu-miR-299-3p  | -0.104 |
| TCONS_00009648 | Unc5b      | mmu-miR-467b-5p | -0.012 |
| TCONS_00009753 | Ybey       | mmu-miR-29b-3p  | -0.562 |
| TCONS_00009753 | Ybey       | mmu-miR-298-5p  | -0.517 |
| TCONS_00009839 | Mobkl2a_j2 | mmu-miR-299-3p  | -0.049 |
| TCONS_00009839 | Mobkl2a_j2 | mmu-miR-298-5p  | -0.578 |
| TCONS_00009839 | Mobkl2a_j2 | mmu-miR-466d-5p | -0.044 |
| TCONS_00009990 | Nts        | rno-let-7f-1*   | -0.066 |
| TCONS_00009990 | Nts        | mmu-let-7a-1-3p | -0.063 |
| TCONS_00010009 | Nav3_j6    | mmu-miR-466d-5p | -0.04  |
| TCONS_00010009 | Nav3_j6    | mmu-miR-544-3p  | -0.057 |
| TCONS_00010009 | Nav3_j6    | mmu-miR-29b-3p  | -0.6   |
| TCONS_00010009 | Nav3_j6    | mmu-miR-19b-3p  | -0.036 |
| TCONS_00010009 | Nav3_j6    | mmu-miR-154-3p  | -0.134 |
| TCONS_00010043 | Cpsf6      | mmu-miR-154-3p  | -0.053 |
| TCONS_00010054 | Dyrk2_j2   | mmu-miR-9-3p    | -0.081 |
| TCONS_00010054 | Dyrk2_j2   | mmu-miR-154-3p  | -0.047 |
| TCONS_00010054 | Dyrk2_j2   | mmu-miR-19b-3p  | -0.079 |
| TCONS_00010054 | Dyrk2_j2   | mmu-miR-298-5p  | -0.057 |
| TCONS_00010054 | Dyrk2_j2   | mmu-miR-466d-5p | -0.068 |
| TCONS_00010555 | Shprh_j3   | mmu-miR-29b-3p  | -0.045 |
| TCONS_00010555 | Shprh_j3   | mmu-let-7a-1-3p | -0.046 |
| TCONS_00010555 | Shprh_j3   | rno-let-7f-1*   | -0.037 |
| TCONS_00010555 | Shprh_j3   | mmu-miR-544-3p  | -0.018 |
| TCONS_00010555 | Shprh_j3   | mmu-miR-467b-5p | -0.082 |
| TCONS_00010555 | Shprh_j3   | mmu-miR-299-3p  | -0.095 |
| TCONS_00010555 | Shprh_j3   | mmu-miR-154-3p  | -0.01  |
| TCONS_00010666 | Gcc2_j2    | mmu-miR-154-3p  | -0.054 |
| TCONS_00010666 | Gcc2_j2    | rno-let-7f-1*   | -0.025 |
| TCONS_00010666 | Gcc2_j2    | mmu-let-7a-1-3p | -0.025 |
| TCONS_00010666 | Gcc2_j2    | mmu-miR-467b-5p | -0.408 |
| TCONS_00010666 | Gcc2_j2    | mmu-miR-544-3p  | -0.09  |
| TCONS_00010666 | Gcc2_j2    | mmu-miR-29b-3p  | -0.078 |
| TCONS_00010738 | Pofut2_j1  | mmu-miR-299-3p  | -0.066 |
| TCONS_00010743 | Icosl_j2   | mmu-miR-299-3p  | -0.194 |
| TCONS_00010743 | Icosl_j2   | mmu-miR-544-3p  | -0.084 |
| TCONS_00010743 | Icosl_j2   | mmu-miR-9-3p    | -0.06  |
| TCONS_00010784 | Dot1l_j8   | mmu-miR-544-3p  | -0.04  |
| TCONS_00010784 | Dot1l_j8   | mmu-miR-298-5p  | -0.118 |
| TCONS_00010784 | Dot1l_j8   | mmu-miR-467b-5p | -0.277 |
| TCONS_00011139 | Aim1_j1    | mmu-miR-544-3p  | -0.171 |

|                |             |                 |        |
|----------------|-------------|-----------------|--------|
| TCONS_00011139 | Aim1_j1     | mmu-miR-154-3p  | -0.029 |
| TCONS_00011139 | Aim1_j1     | mmu-miR-29b-3p  | -0.161 |
| TCONS_00011384 | Lemd3_j2    | mmu-miR-19b-3p  | -0.094 |
| TCONS_00011384 | Lemd3_j2    | mmu-let-7a-1-3p | -0.205 |
| TCONS_00011384 | Lemd3_j2    | mmu-miR-154-3p  | -0.086 |
| TCONS_00011384 | Lemd3_j2    | mmu-miR-29b-3p  | -0.182 |
| TCONS_00011384 | Lemd3_j2    | rno-let-7f-1*   | -0.2   |
| TCONS_00011839 | Dcbl1_j1    | mmu-let-7a-1-3p | -0.01  |
| TCONS_00011894 | Slc19a1_j1  | mmu-miR-2137    | -0.32  |
| TCONS_00011897 | Itgb2       | mmu-miR-298-5p  | -0.318 |
| TCONS_00011897 | Itgb2       | mmu-miR-299-3p  | -0.234 |
| TCONS_00011915 | Fstl3_j3    | mmu-miR-299-3p  | -0.207 |
| TCONS_00012037 | Mgat4c_j1   | mmu-miR-154-3p  | -0.077 |
| TCONS_00012037 | Mgat4c_j1   | rno-let-7f-1*   | -0.01  |
| TCONS_00012037 | Mgat4c_j1   | mmu-let-7a-1-3p | -0.021 |
| TCONS_00012265 | Ybey_j1     | mmu-miR-298-5p  | -0.067 |
| TCONS_00012265 | Ybey_j1     | mmu-miR-29b-3p  | -0.582 |
| TCONS_00012293 | Adamts15_j7 | mmu-miR-466d-5p | -0.128 |
| TCONS_00012293 | Adamts15_j7 | mmu-miR-298-5p  | -0.091 |
| TCONS_00012293 | Adamts15_j7 | mmu-miR-544-3p  | -0.08  |
| TCONS_00012342 | Dram1       | mmu-miR-467b-5p | -0.202 |
| TCONS_00012342 | Dram1       | mmu-let-7a-1-3p | -0.045 |
| TCONS_00012342 | Dram1       | rno-let-7f-1*   | -0.054 |
| TCONS_00012342 | Dram1       | mmu-miR-29b-3p  | -0.157 |
| TCONS_00012342 | Dram1       | mmu-miR-544-3p  | -0.225 |
| TCONS_00012342 | Dram1       | mmu-miR-298-5p  | -0.11  |
| TCONS_00012386 | Tmtc2_j1    | rno-let-7f-1*   | -0.255 |
| TCONS_00012386 | Tmtc2_j1    | mmu-let-7a-1-3p | -0.265 |
| TCONS_00012773 | Cd24a_j3    | mmu-miR-9-3p    | -0.023 |
| TCONS_00012773 | Cd24a_j3    | mmu-miR-467b-5p | -0.059 |
| TCONS_00012773 | Cd24a_j3    | mmu-miR-466d-5p | -0.195 |
| TCONS_00012790 | Hsf2_j2     | mmu-miR-544-3p  | -0.083 |
| TCONS_00012790 | Hsf2_j2     | mmu-miR-299-3p  | -0.259 |
| TCONS_00012813 | Jmjd1c_j6   | mmu-miR-19b-3p  | -0.064 |
| TCONS_00013119 | Ccdc162_j11 | mmu-miR-544-3p  | -0.167 |
| TCONS_00013119 | Ccdc162_j11 | mmu-miR-299-3p  | -0.122 |
| TCONS_00013172 | Sirt1       | mmu-miR-154-3p  | -0.321 |
| TCONS_00013172 | Sirt1       | rno-let-7f-1*   | -0.042 |
| TCONS_00013172 | Sirt1       | mmu-miR-544-3p  | -0.25  |
| TCONS_00013172 | Sirt1       | mmu-miR-29b-3p  | -0.169 |
| TCONS_00013172 | Sirt1       | mmu-let-7a-1-3p | -0.045 |
| TCONS_00013232 | Gng7_j1     | mmu-miR-298-5p  | -0.187 |
| TCONS_00013290 | Lrriq1_j4   | mmu-miR-298-5p  | -0.102 |
| TCONS_00013290 | Lrriq1_j4   | mmu-miR-299-3p  | -0.133 |
| TCONS_00013360 | Rab5b_j10   | mmu-miR-298-5p  | -0.129 |
| TCONS_00013360 | Rab5b_j10   | mmu-miR-19b-3p  | -0.031 |
| TCONS_00013360 | Rab5b_j10   | mmu-miR-544-3p  | -0.097 |



|                |               |                 |        |
|----------------|---------------|-----------------|--------|
| TCONS_00013361 | Rab5b_j11     | mmu-miR-298-5p  | -0.129 |
| TCONS_00013361 | Rab5b_j11     | mmu-miR-544-3p  | -0.097 |
| TCONS_00013361 | Rab5b_j11     | mmu-miR-19b-3p  | -0.032 |
| TCONS_00013643 | Sgk1_j2       | mmu-miR-19b-3p  | -0.305 |
| TCONS_00013643 | Sgk1_j2       | mmu-miR-29b-3p  | -0.284 |
| TCONS_00013766 | Izumo4_j4     | mmu-miR-29b-3p  | -0.135 |
| TCONS_00013766 | Izumo4_j4     | mmu-miR-544-3p  | -0.075 |
| TCONS_00014135 | Nts_j3        | rno-let-7f-1*   | -0.066 |
| TCONS_00014135 | Nts_j3        | mmu-let-7a-1-3p | -0.063 |
| TCONS_00014179 | Os9_j2        | mmu-miR-467b-5p | -0.271 |
| TCONS_00014198 | Rab5b_j7      | mmu-miR-544-3p  | -0.096 |
| TCONS_00014198 | Rab5b_j7      | mmu-miR-19b-3p  | -0.052 |
| TCONS_00014198 | Rab5b_j7      | mmu-miR-298-5p  | -0.127 |
| TCONS_00014199 | Rab5b_j8      | mmu-miR-544-3p  | -0.096 |
| TCONS_00014199 | Rab5b_j8      | mmu-miR-19b-3p  | -0.046 |
| TCONS_00014199 | Rab5b_j8      | mmu-miR-298-5p  | -0.127 |
| TCONS_00014452 | Nhsl1_j1      | mmu-miR-29b-3p  | -0.085 |
| TCONS_00014452 | Nhsl1_j1      | mmu-miR-466d-5p | -0.378 |
| TCONS_00014452 | Nhsl1_j1      | mmu-miR-154-3p  | -0.048 |
| TCONS_00014452 | Nhsl1_j1      | mmu-miR-298-5p  | -0.401 |
| TCONS_00014452 | Nhsl1_j1      | mmu-miR-467b-5p | -0.12  |
| TCONS_00014452 | Nhsl1_j1      | mmu-miR-19b-3p  | -0.064 |
| TCONS_00014517 | Sh3rf3_j6     | mmu-miR-544-3p  | -0.067 |
| TCONS_00014517 | Sh3rf3_j6     | mmu-miR-467b-5p | -0.013 |
| TCONS_00014517 | Sh3rf3_j6     | mmu-miR-299-3p  | -0.212 |
| TCONS_00014517 | Sh3rf3_j6     | mmu-miR-466d-5p | -1.54  |
| TCONS_00014517 | Sh3rf3_j6     | mmu-miR-29b-3p  | -0.207 |
| TCONS_00014531 | Rhobtb1       | mmu-miR-29b-3p  | -0.218 |
| TCONS_00014531 | Rhobtb1       | mmu-miR-466d-5p | -1.49  |
| TCONS_00014531 | Rhobtb1       | mmu-miR-299-3p  | -0.069 |
| TCONS_00014531 | Rhobtb1       | mmu-miR-298-5p  | -0.046 |
| TCONS_00014567 | Gpx4_j3       | mmu-miR-466d-5p | -0.05  |
| TCONS_00014605 | D10Wsu102e_j1 | mmu-let-7a-1-3p | -0.043 |
| TCONS_00014605 | D10Wsu102e_j1 | rno-let-7f-1*   | -0.024 |
| TCONS_00014605 | D10Wsu102e_j1 | mmu-miR-466d-5p | -0.118 |
| TCONS_00014628 | Uhrf1bp1l_j7  | mmu-miR-544-3p  | -0.084 |
| TCONS_00014628 | Uhrf1bp1l_j7  | mmu-miR-29b-3p  | -0.135 |
| TCONS_00014628 | Uhrf1bp1l_j7  | mmu-miR-466d-5p | -0.302 |
| TCONS_00014782 | Aim1_j2       | mmu-miR-9-3p    | -0.048 |
| TCONS_00014784 | Lin28b_j13    | mmu-miR-466d-5p | -0.987 |
| TCONS_00014784 | Lin28b_j13    | mmu-miR-19b-3p  | -0.033 |
| TCONS_00014784 | Lin28b_j13    | mmu-miR-9-3p    | -0.032 |
| TCONS_00014784 | Lin28b_j13    | mmu-miR-467b-5p | -0.06  |
| TCONS_00014784 | Lin28b_j13    | mmu-miR-298-5p  | -0.086 |
| TCONS_00014829 | Susd2_j5      | mmu-miR-298-5p  | -0.129 |
| TCONS_00014920 | Elk3_j1       | mmu-miR-298-5p  | -0.097 |
| TCONS_00015264 | Gatsl3_j2     | mmu-miR-29b-3p  | -0.186 |

|                |           |                 |        |
|----------------|-----------|-----------------|--------|
| TCONS_00015380 | Rtn4_j2   | mmu-miR-9-3p    | -0.073 |
| TCONS_00015398 | Asb3      | mmu-miR-466d-5p | -0.13  |
| TCONS_00015398 | Asb3      | mmu-let-7a-1-3p | -0.032 |
| TCONS_00015398 | Asb3      | rno-let-7f-1*   | -0.051 |
| TCONS_00015398 | Asb3      | mmu-miR-29b-3p  | -0.21  |
| TCONS_00015398 | Asb3      | mmu-miR-544-3p  | -0.116 |
| TCONS_00015398 | Asb3      | mmu-miR-467b-5p | -0.172 |
| TCONS_00015425 | Lcp2_j2   | mmu-miR-9-3p    | -0.033 |
| TCONS_00015425 | Lcp2_j2   | mmu-miR-298-5p  | -0.088 |
| TCONS_00015425 | Lcp2_j2   | mmu-miR-466d-5p | -3.74  |
| TCONS_00015425 | Lcp2_j2   | mmu-miR-467b-5p | -0.127 |
| TCONS_00015426 | Lcp2_j3   | mmu-miR-466d-5p | -3.74  |
| TCONS_00015426 | Lcp2_j3   | mmu-miR-9-3p    | -0.033 |
| TCONS_00015426 | Lcp2_j3   | mmu-miR-298-5p  | -0.088 |
| TCONS_00015426 | Lcp2_j3   | mmu-miR-467b-5p | -0.127 |
| TCONS_00015427 | Fam196b   | mmu-miR-467b-5p | -0.073 |
| TCONS_00015427 | Fam196b   | mmu-miR-154-3p  | -0.059 |
| TCONS_00015427 | Fam196b   | mmu-miR-298-5p  | -0.538 |
| TCONS_00015427 | Fam196b   | mmu-miR-466d-5p | -0.017 |
| TCONS_00015643 | Mmgt2_j1  | mmu-miR-298-5p  | -0.235 |
| TCONS_00015725 | Sat2      | mmu-miR-298-5p  | -0.407 |
| TCONS_00015725 | Sat2      | mmu-miR-154-3p  | -0.003 |
| TCONS_00015854 | Slc6a4    | mmu-miR-154-3p  | -0.081 |
| TCONS_00015918 | Adap2     | mmu-let-7a-1-3p | -0.042 |
| TCONS_00015918 | Adap2     | rno-let-7f-1*   | -0.042 |
| TCONS_00015939 | Ccl7      | mmu-miR-544-3p  | -0.121 |
| TCONS_00015939 | Ccl7      | mmu-miR-154-3p  | -0.089 |
| TCONS_00015941 | Ccl12     | mmu-miR-154-3p  | -0.101 |
| TCONS_00016065 | Spag9_j3  | mmu-miR-299-3p  | -0.157 |
| TCONS_00016065 | Spag9_j3  | mmu-miR-467b-5p | -0.057 |
| TCONS_00016110 | Hoxb8_j1  | mmu-miR-2137    | -0.291 |
| TCONS_00016256 | Arf2_j1   | mmu-miR-9-3p    | -0.014 |
| TCONS_00016256 | Arf2_j1   | mmu-miR-29b-3p  | -0.365 |
| TCONS_00016270 | Tlk2_j3   | mmu-miR-154-3p  | -0.078 |
| TCONS_00016270 | Tlk2_j3   | mmu-miR-298-5p  | -0.161 |
| TCONS_00016270 | Tlk2_j3   | mmu-miR-9-3p    | -0.052 |
| TCONS_00016270 | Tlk2_j3   | mmu-miR-544-3p  | -0.034 |
| TCONS_00016327 | Sox9      | mmu-miR-298-5p  | -0.289 |
| TCONS_00016327 | Sox9      | mmu-let-7a-1-3p | -0.187 |
| TCONS_00016327 | Sox9      | rno-let-7f-1*   | -0.191 |
| TCONS_00016327 | Sox9      | mmu-miR-9-3p    | -0.028 |
| TCONS_00016495 | Metrnl    | mmu-miR-29b-3p  | -0.283 |
| TCONS_00016694 | Kcnip1_j3 | mmu-miR-298-5p  | -0.143 |
| TCONS_00016794 | Phf15_j2  | mmu-miR-298-5p  | -0.081 |
| TCONS_00016810 | AK138371  | mmu-miR-29b-3p  | -0.39  |
| TCONS_00017017 | Cxcl16    | mmu-miR-9-3p    | -0.116 |
| TCONS_00017017 | Cxcl16    | mmu-miR-298-5p  | -0.201 |

|                |            |                 |        |
|----------------|------------|-----------------|--------|
| TCONS_00017017 | Cxcl16     | mmu-miR-154-3p  | -0.046 |
| TCONS_00017063 | Doc2b      | mmu-miR-544-3p  | -0.021 |
| TCONS_00017063 | Doc2b      | mmu-miR-466d-5p | -0.748 |
| TCONS_00017136 | Cct6b_j10  | mmu-miR-9-3p    | -0.051 |
| TCONS_00017136 | Cct6b_j10  | mmu-miR-467b-5p | -0.101 |
| TCONS_00017136 | Cct6b_j10  | mmu-miR-19b-3p  | -0.089 |
| TCONS_00017136 | Cct6b_j10  | mmu-miR-298-5p  | -0.27  |
| TCONS_00017136 | Cct6b_j10  | mmu-miR-466d-5p | -0.019 |
| TCONS_00017245 | Itga3_j3   | mmu-let-7a-1-3p | -0.005 |
| TCONS_00017245 | Itga3_j3   | mmu-miR-19b-3p  | -0.063 |
| TCONS_00017245 | Itga3_j3   | mmu-miR-466d-5p | -0.532 |
| TCONS_00017245 | Itga3_j3   | rno-let-7f-1*   | -0.023 |
| TCONS_00017245 | Itga3_j3   | mmu-miR-2137    | -0.246 |
| TCONS_00017367 | Dhx58_j1   | mmu-miR-466d-5p | -0.243 |
| TCONS_00017367 | Dhx58_j1   | mmu-miR-298-5p  | -0.057 |
| TCONS_00017683 | Sectm1b    | mmu-miR-19b-3p  | -0.123 |
| TCONS_00017684 | Sectm1b    | mmu-miR-19b-3p  | -0.123 |
| TCONS_00018490 | Zmynd15_j1 | mmu-miR-298-5p  | -0.12  |
| TCONS_00018490 | Zmynd15_j1 | mmu-miR-2137    | -0.278 |
| TCONS_00018630 | Lig3       | mmu-let-7a-1-3p | -0.031 |
| TCONS_00018630 | Lig3       | mmu-miR-29b-3p  | -0.19  |
| TCONS_00018630 | Lig3       | mmu-miR-544-3p  | -0.01  |
| TCONS_00018630 | Lig3       | rno-let-7f-1*   | -0.031 |
| TCONS_00018678 | Sept4_j2   | mmu-miR-299-3p  | -0.154 |
| TCONS_00018712 | Fam117a_j2 | rno-let-7f-1*   | -0.117 |
| TCONS_00018712 | Fam117a_j2 | mmu-let-7a-1-3p | -0.117 |
| TCONS_00018935 | Sec14l1_j2 | mmu-let-7a-1-3p | -0.064 |
| TCONS_00018935 | Sec14l1_j2 | rno-let-7f-1*   | -0.083 |
| TCONS_00018935 | Sec14l1_j2 | mmu-miR-298-5p  | -0.081 |
| TCONS_00018935 | Sec14l1_j2 | mmu-miR-299-3p  | -0.133 |
| TCONS_00019452 | Itga3      | mmu-miR-2137    | -0.226 |
| TCONS_00019452 | Itga3      | rno-let-7f-1*   | -0.038 |
| TCONS_00019452 | Itga3      | mmu-miR-19b-3p  | -0.042 |
| TCONS_00019452 | Itga3      | mmu-miR-466d-5p | -0.417 |
| TCONS_00019452 | Itga3      | mmu-let-7a-1-3p | -0.02  |
| TCONS_00019732 | Fasn_j2    | mmu-miR-298-5p  | -0.065 |
| TCONS_00020144 | Pes1_j9    | mmu-miR-29b-3p  | -0.226 |
| TCONS_00020144 | Pes1_j9    | mmu-miR-466d-5p | -0.116 |
| TCONS_00020144 | Pes1_j9    | mmu-miR-544-3p  | -0.194 |
| TCONS_00020144 | Pes1_j9    | mmu-miR-298-5p  | -0.1   |
| TCONS_00020173 | Adcy1_j2   | mmu-miR-467b-5p | -0.046 |
| TCONS_00020173 | Adcy1_j2   | rno-let-7f-1*   | -0.235 |
| TCONS_00020173 | Adcy1_j2   | mmu-miR-466d-5p | -0.207 |
| TCONS_00020173 | Adcy1_j2   | mmu-let-7a-1-3p | -0.193 |
| TCONS_00020173 | Adcy1_j2   | mmu-miR-19b-3p  | -0.513 |
| TCONS_00020222 | Gabrb2     | mmu-miR-9-3p    | -0.163 |
| TCONS_00020222 | Gabrb2     | mmu-miR-466d-5p | -0.667 |

|                |              |                 |        |
|----------------|--------------|-----------------|--------|
| TCONS_00020251 | Hnrnph1_j8   | mmu-miR-29b-3p  | -0.171 |
| TCONS_00020270 | Sept8_j1     | mmu-miR-29b-3p  | -0.051 |
| TCONS_00020292 | Zfp692-ps_j2 | mmu-miR-466d-5p | -0.101 |
| TCONS_00020292 | Zfp692-ps_j2 | mmu-miR-299-3p  | -0.074 |
| TCONS_00020292 | Zfp692-ps_j2 | mmu-miR-298-5p  | -0.198 |
| TCONS_00020292 | Zfp692-ps_j2 | mmu-miR-29b-3p  | -0.14  |
| TCONS_00020294 | Wnt9a_j1     | mmu-miR-29b-3p  | -0.067 |
| TCONS_00020294 | Wnt9a_j1     | mmu-miR-466d-5p | -0.031 |
| TCONS_00020294 | Wnt9a_j1     | mmu-miR-2137    | -0.297 |
| TCONS_00020294 | Wnt9a_j1     | mmu-miR-19b-3p  | -0.261 |
| TCONS_00020294 | Wnt9a_j1     | mmu-miR-298-5p  | -0.006 |
| TCONS_00020294 | Wnt9a_j1     | rno-let-7f-1*   | -0.033 |
| TCONS_00020294 | Wnt9a_j1     | mmu-let-7a-1-3p | -0.033 |
| TCONS_00020359 | Per1_j6      | mmu-miR-467b-5p | -0.148 |
| TCONS_00020359 | Per1_j6      | mmu-miR-29b-3p  | -0.091 |
| TCONS_00020568 | Mmd_j1       | mmu-miR-467b-5p | -0.024 |
| TCONS_00020568 | Mmd_j1       | mmu-miR-298-5p  | -0.348 |
| TCONS_00020627 | Rapgef1_j1   | mmu-miR-467b-5p | -0.092 |
| TCONS_00020627 | Rapgef1_j1   | mmu-miR-298-5p  | -0.036 |
| TCONS_00020627 | Rapgef1_j1   | mmu-miR-299-3p  | -0.028 |
| TCONS_00020627 | Rapgef1_j1   | mmu-miR-19b-3p  | -0.027 |
| TCONS_00020627 | Rapgef1_j1   | mmu-miR-544-3p  | -0.145 |
| TCONS_00020627 | Rapgef1_j1   | mmu-miR-9-3p    | -0.056 |
| TCONS_00020627 | Rapgef1_j1   | mmu-miR-466d-5p | -0.085 |
| TCONS_00020627 | Rapgef1_j1   | mmu-miR-29b-3p  | -0.081 |
| TCONS_00020673 | Tlk2_j2      | mmu-miR-9-3p    | -0.052 |
| TCONS_00020673 | Tlk2_j2      | mmu-miR-154-3p  | -0.078 |
| TCONS_00020673 | Tlk2_j2      | mmu-miR-298-5p  | -0.122 |
| TCONS_00020815 | Kremen1_j1   | mmu-miR-298-5p  | -0.152 |
| TCONS_00020815 | Kremen1_j1   | mmu-miR-299-3p  | -0.167 |
| TCONS_00020815 | Kremen1_j1   | mmu-miR-467b-5p | -0.081 |
| TCONS_00020847 | Cep68_j2     | mmu-miR-467b-5p | -0.146 |
| TCONS_00020880 | Npm1_j1      | mmu-miR-154-3p  | -0.042 |
| TCONS_00020880 | Npm1_j1      | mmu-miR-467b-5p | -0.068 |
| TCONS_00020880 | Npm1_j1      | mmu-miR-466d-5p | -0.392 |
| TCONS_00020880 | Npm1_j1      | mmu-miR-298-5p  | -0.061 |
| TCONS_00020880 | Npm1_j1      | mmu-miR-9-3p    | -0.027 |
| TCONS_00020894 | Wwc1         | rno-let-7f-1*   | -0.249 |
| TCONS_00020894 | Wwc1         | mmu-let-7a-1-3p | -0.258 |
| TCONS_00020918 | Trim41_j2    | mmu-miR-2137    | -0.272 |
| TCONS_00020943 | Phf15        | mmu-miR-298-5p  | -0.081 |
| TCONS_00020989 | Slc47a1_j2   | mmu-miR-19b-3p  | -0.086 |
| TCONS_00020989 | Slc47a1_j2   | mmu-miR-299-3p  | -0.178 |
| TCONS_00021245 | Meox1_j1     | mmu-miR-544-3p  | -0.248 |
| TCONS_00021245 | Meox1_j1     | mmu-miR-466d-5p | -0.239 |
| TCONS_00021303 | Bptf_j10     | mmu-miR-467b-5p | -0.013 |
| TCONS_00021303 | Bptf_j10     | mmu-miR-19b-3p  | -0.008 |

|                |             |                 |        |
|----------------|-------------|-----------------|--------|
| TCONS_00021303 | Bptf_j10    | mmu-miR-298-5p  | -0.559 |
| TCONS_00021303 | Bptf_j10    | mmu-miR-466d-5p | -0.014 |
| TCONS_00021311 | XLOC_005303 | mmu-miR-29b-3p  | -0.123 |
| TCONS_00021311 | XLOC_005303 | mmu-miR-19b-3p  | -0.027 |
| TCONS_00021796 | Adam19_j2   | mmu-miR-298-5p  | -0.125 |
| TCONS_00021796 | Adam19_j2   | mmu-miR-29b-3p  | -0.153 |
| TCONS_00021796 | Adam19_j2   | mmu-miR-466d-5p | -0.16  |
| TCONS_00021796 | Adam19_j2   | mmu-miR-467b-5p | -0.059 |
| TCONS_00021826 | Zcchc10_j1  | rno-let-7f-1*   | -0.152 |
| TCONS_00021826 | Zcchc10_j1  | mmu-let-7a-1-3p | -0.152 |
| TCONS_00021899 | Sat2_j4     | mmu-miR-154-3p  | -0.016 |
| TCONS_00021899 | Sat2_j4     | mmu-miR-298-5p  | -0.294 |
| TCONS_00022040 | Supt4h1     | mmu-miR-544-3p  | -0.293 |
| TCONS_00022040 | Supt4h1     | mmu-miR-298-5p  | -0.136 |
| TCONS_00022118 | Naglu_j1    | mmu-miR-298-5p  | -0.082 |
| TCONS_00022118 | Naglu_j1    | mmu-miR-29b-3p  | -0.146 |
| TCONS_00022118 | Naglu_j1    | mmu-miR-466d-5p | -0.126 |
| TCONS_00022118 | Naglu_j1    | mmu-miR-9-3p    | -0.053 |
| TCONS_00022165 | Mrc2_j1     | mmu-miR-29b-3p  | -0.105 |
| TCONS_00022270 | Metrn1      | mmu-miR-29b-3p  | -0.292 |
| TCONS_00022336 | Papolg_j1   | mmu-let-7a-1-3p | -0.286 |
| TCONS_00022336 | Papolg_j1   | rno-let-7f-1*   | -0.303 |
| TCONS_00022336 | Papolg_j1   | mmu-miR-29b-3p  | -0.212 |
| TCONS_00022353 | Kcnip1_j2   | mmu-miR-298-5p  | -0.127 |
| TCONS_00022353 | Kcnip1_j2   | mmu-miR-544-3p  | -0.067 |
| TCONS_00022432 | Flii_j4     | mmu-miR-466d-5p | -0.133 |
| TCONS_00022533 | Hic1        | rno-let-7f-1*   | -0.022 |
| TCONS_00022533 | Hic1        | mmu-miR-19b-3p  | -0.231 |
| TCONS_00022533 | Hic1        | mmu-let-7a-1-3p | -0.05  |
| TCONS_00022609 | Itga3_j8    | mmu-miR-19b-3p  | -0.063 |
| TCONS_00022609 | Itga3_j8    | mmu-miR-466d-5p | -0.559 |
| TCONS_00022609 | Itga3_j8    | mmu-miR-2137    | -0.251 |
| TCONS_00022616 | Cdk5rap3_j1 | mmu-miR-298-5p  | -0.139 |
| TCONS_00023343 | Psmc11_j3   | mmu-miR-298-5p  | -0.202 |
| TCONS_00023404 | Spop_j2     | mmu-miR-29b-3p  | -0.088 |
| TCONS_00023404 | Spop_j2     | mmu-miR-544-3p  | -0.28  |
| TCONS_00023404 | Spop_j2     | mmu-miR-298-5p  | -0.145 |
| TCONS_00023404 | Spop_j2     | mmu-miR-467b-5p | -0.091 |
| TCONS_00023492 | Ccdc46_j5   | mmu-miR-299-3p  | -0.239 |
| TCONS_00023492 | Ccdc46_j5   | mmu-miR-29b-3p  | -0.265 |
| TCONS_00023577 | Slc25a10_j1 | mmu-miR-298-5p  | -0.142 |
| TCONS_00023577 | Slc25a10_j1 | mmu-miR-466d-5p | -0.421 |
| TCONS_00023583 | Slc16a3_j1  | mmu-miR-544-3p  | -0.084 |
| TCONS_00023649 | Ahsa2_j1    | mmu-miR-298-5p  | -0.39  |
| TCONS_00023649 | Ahsa2_j1    | mmu-miR-29b-3p  | -0.153 |
| TCONS_00023649 | Ahsa2_j1    | mmu-miR-466d-5p | -0.088 |
| TCONS_00023649 | Ahsa2_j1    | mmu-miR-544-3p  | -0.042 |

|                |             |                 |        |
|----------------|-------------|-----------------|--------|
| TCONS_00023783 | Efnb3_j1    | mmu-miR-299-3p  | -0.155 |
| TCONS_00023803 | Cxcl16_j2   | mmu-miR-298-5p  | -0.201 |
| TCONS_00023803 | Cxcl16_j2   | mmu-miR-9-3p    | -0.077 |
| TCONS_00023803 | Cxcl16_j2   | mmu-miR-154-3p  | -0.007 |
| TCONS_00024417 | Egfr        | mmu-miR-544-3p  | -0.138 |
| TCONS_00024418 | Egfr_j2     | mmu-miR-298-5p  | -0.084 |
| TCONS_00024418 | Egfr_j2     | mmu-miR-9-3p    | -0.085 |
| TCONS_00024423 | Fam161a_j10 | mmu-miR-2137    | -0.236 |
| TCONS_00024423 | Fam161a_j10 | mmu-miR-544-3p  | -0.343 |
| TCONS_00024466 | Adam19_j1   | mmu-miR-298-5p  | -0.122 |
| TCONS_00024466 | Adam19_j1   | mmu-miR-467b-5p | -0.053 |
| TCONS_00024466 | Adam19_j1   | mmu-miR-29b-3p  | -0.148 |
| TCONS_00024466 | Adam19_j1   | mmu-miR-466d-5p | -0.147 |
| TCONS_00024476 | Gfpt2_j1    | mmu-let-7a-1-3p | -0.011 |
| TCONS_00024476 | Gfpt2_j1    | rno-let-7f-1*   | -0.03  |
| TCONS_00024555 | Fbxw10_j5   | mmu-miR-9-3p    | -0.021 |
| TCONS_00024555 | Fbxw10_j5   | mmu-miR-29b-3p  | -0.157 |
| TCONS_00024555 | Fbxw10_j5   | mmu-miR-544-3p  | -0.161 |
| TCONS_00024682 | Unc45b_j1   | mmu-miR-298-5p  | -0.101 |
| TCONS_00024682 | Unc45b_j1   | mmu-miR-29b-3p  | -0.168 |
| TCONS_00024686 | Slfn5       | mmu-miR-544-3p  | -0.071 |
| TCONS_00024686 | Slfn5       | mmu-miR-154-3p  | -0.122 |
| TCONS_00024686 | Slfn5       | mmu-miR-9-3p    | -0.179 |
| TCONS_00024686 | Slfn5       | mmu-miR-467b-5p | -0.016 |
| TCONS_00024686 | Slfn5       | mmu-miR-298-5p  | -0.025 |
| TCONS_00024686 | Slfn5       | mmu-miR-466d-5p | -0.063 |
| TCONS_00024686 | Slfn5       | mmu-miR-299-3p  | -0.086 |
| TCONS_00024688 | Al662270_j1 | rno-let-7f-1*   | -0.026 |
| TCONS_00024688 | Al662270_j1 | mmu-miR-467b-5p | -0.129 |
| TCONS_00024688 | Al662270_j1 | mmu-let-7a-1-3p | -0.029 |
| TCONS_00024731 | Coil_j1     | mmu-miR-2137    | -0.534 |
| TCONS_00024731 | Coil_j1     | mmu-miR-29b-3p  | -0.187 |
| TCONS_00024750 | Zfp652_j2   | mmu-miR-298-5p  | -0.119 |
| TCONS_00024750 | Zfp652_j2   | mmu-miR-299-3p  | -0.003 |
| TCONS_00024750 | Zfp652_j2   | mmu-miR-29b-3p  | -0.094 |
| TCONS_00024750 | Zfp652_j2   | mmu-let-7a-1-3p | -0.146 |
| TCONS_00024750 | Zfp652_j2   | rno-let-7f-1*   | -0.144 |
| TCONS_00024756 | Skap1_j2    | mmu-miR-466d-5p | -0.412 |
| TCONS_00024756 | Skap1_j2    | mmu-miR-299-3p  | -0.271 |
| TCONS_00024756 | Skap1_j2    | mmu-miR-544-3p  | -0.112 |
| TCONS_00024935 | Polm_j10    | mmu-miR-298-5p  | -0.114 |
| TCONS_00024935 | Polm_j10    | mmu-miR-299-3p  | -0.051 |
| TCONS_00024935 | Polm_j10    | mmu-miR-544-3p  | -0.059 |
| TCONS_00024935 | Polm_j10    | mmu-miR-466d-5p | -0.086 |
| TCONS_00024935 | Polm_j10    | mmu-miR-29b-3p  | -0.063 |
| TCONS_00024984 | Acyp2_j2    | mmu-miR-299-3p  | -0.064 |
| TCONS_00025016 | Maml1       | mmu-miR-154-3p  | -0.062 |

|                |               |                 |           |
|----------------|---------------|-----------------|-----------|
| TCONS_00025016 | Maml1         | mmu-miR-466d-5p | -0.034    |
| TCONS_00025023 | Sec24a_j1     | mmu-miR-9-3p    | -0.144    |
| TCONS_00025023 | Sec24a_j1     | mmu-miR-154-3p  | -0.067    |
| TCONS_00025030 | Tnip1_j7      | mmu-miR-466d-5p | -0.158    |
| TCONS_00025030 | Tnip1_j7      | mmu-miR-19b-3p  | -0.127    |
| TCONS_00025030 | Tnip1_j7      | mmu-miR-544-3p  | -0.044    |
| TCONS_00025039 | Guk1_j2       | mmu-miR-298-5p  | -0.082    |
| TCONS_00025094 | Fgf11_j1      | mmu-miR-466d-5p | -2.02     |
| TCONS_00025094 | Fgf11_j1      | mmu-miR-154-3p  | -0.005    |
| TCONS_00025094 | Fgf11_j1      | mmu-miR-9-3p    | -0.011    |
| TCONS_00025198 | Nxph3_j2      | mmu-miR-298-5p  | -0.169    |
| TCONS_00025276 | Map3k14_j1    | mmu-miR-299-3p  | -0.216    |
| TCONS_00025276 | Map3k14_j1    | mmu-miR-298-5p  | -0.068    |
| TCONS_00025276 | Map3k14_j1    | mmu-miR-29b-3p  | -0.132    |
| TCONS_00025276 | Map3k14_j1    | mmu-miR-19b-3p  | -0.051    |
| TCONS_00025342 | Rhbdf2_j4     | mmu-miR-298-5p  | -0.073    |
| TCONS_00025342 | Rhbdf2_j4     | mmu-miR-466d-5p | -0.028    |
| TCONS_00025687 | Dtnb_j3       | mmu-miR-298-5p  | -0.209    |
| TCONS_00025727 | Sdc1_j1       | mmu-miR-467b-5p | -0.097    |
| TCONS_00025727 | Sdc1_j1       | mmu-miR-19b-3p  | -0.223    |
| TCONS_00025727 | Sdc1_j1       | mmu-miR-298-5p  | -0.32     |
| TCONS_00025899 | Arhgap5_j3    | mmu-miR-19b-3p  | -0.037    |
| TCONS_00025899 | Arhgap5_j3    | rno-let-7f-1*   | -0.041    |
| TCONS_00025899 | Arhgap5_j3    | mmu-let-7a-1-3p | -0.069    |
| TCONS_00025899 | Arhgap5_j3    | mmu-miR-544-3p  | -0.004    |
| TCONS_00026014 | Syne2_j16     | mmu-miR-9-3p    | -0.088    |
| TCONS_00026014 | Syne2_j16     | mmu-miR-466d-5p | -0.07     |
| TCONS_00026014 | Syne2_j16     | rno-let-7f-1*   | -0.049    |
| TCONS_00026014 | Syne2_j16     | mmu-let-7a-1-3p | -0.043    |
| TCONS_00026062 | Srsf5_j8      | mmu-miR-467b-5p | -0.102    |
| TCONS_00026078 | Rgs6_j6       | mmu-miR-298-5p  | -0.031    |
| TCONS_00026078 | Rgs6_j6       | mmu-miR-466d-5p | -0.158    |
| TCONS_00026129 | Esrrb         | mmu-miR-298-5p  | -0.061    |
| TCONS_00026138 | 1810035L17Rik | mmu-miR-298-5p  | -0.214    |
| TCONS_00026138 | 1810035L17Rik | mmu-miR-466d-5p | -0.307    |
| TCONS_00026271 | Dync1h1_j11   | mmu-miR-544-3p  | -0.055    |
| TCONS_00026325 | Pld4          | mmu-miR-29b-3p  | -0.232    |
| TCONS_00026353 | Tmem196_j2    | mmu-miR-9-3p    | -0.11     |
| TCONS_00026510 | Ralgapa1_j1   | mmu-miR-9-3p    | -0.082    |
| TCONS_00026510 | Ralgapa1_j1   | mmu-miR-154-3p  | -6.94E-18 |
| TCONS_00026524 | AK043502_j1   | mmu-miR-544-3p  | -0.098    |
| TCONS_00026524 | AK043502_j1   | mmu-miR-299-3p  | -0.212    |
| TCONS_00026524 | AK043502_j1   | mmu-miR-29b-3p  | -0.333    |
| TCONS_00026752 | Trip11_j1     | mmu-miR-19b-3p  | -0.031    |
| TCONS_00026752 | Trip11_j1     | mmu-miR-544-3p  | -0.045    |
| TCONS_00026752 | Trip11_j1     | mmu-miR-9-3p    | -0.027    |
| TCONS_00026752 | Trip11_j1     | mmu-miR-299-3p  | -0.096    |

|                |                  |                 |        |
|----------------|------------------|-----------------|--------|
| TCONS_00026752 | Trip11_j1        | mmu-miR-466d-5p | -0.398 |
| TCONS_00026752 | Trip11_j1        | mmu-miR-298-5p  | -0.122 |
| TCONS_00026752 | Trip11_j1        | mmu-miR-467b-5p | -0.118 |
| TCONS_00026766 | Asb2             | mmu-miR-298-5p  | -0.213 |
| TCONS_00027273 | Sdc1_j3          | mmu-miR-467b-5p | -0.097 |
| TCONS_00027273 | Sdc1_j3          | mmu-miR-19b-3p  | -0.223 |
| TCONS_00027273 | Sdc1_j3          | mmu-miR-298-5p  | -0.32  |
| TCONS_00027274 | Sdc1_j5          | mmu-miR-467b-5p | -0.097 |
| TCONS_00027274 | Sdc1_j5          | mmu-miR-298-5p  | -0.32  |
| TCONS_00027274 | Sdc1_j5          | mmu-miR-19b-3p  | -0.223 |
| TCONS_00027443 | Prkch_j3         | mmu-miR-298-5p  | -0.209 |
| TCONS_00027656 | AW555464_j3      | mmu-miR-544-3p  | -0.115 |
| TCONS_00027658 | Pld4_j2          | mmu-miR-29b-3p  | -0.231 |
| TCONS_00027731 | XLOC_006968      | mmu-miR-299-3p  | -0.101 |
| TCONS_00027731 | XLOC_006968      | mmu-miR-29b-3p  | -0.169 |
| TCONS_00027755 | F730043M19Rik_j4 | mmu-miR-9-3p    | -0.101 |
| TCONS_00027969 | Stk30_j6         | mmu-miR-298-5p  | -0.103 |
| TCONS_00027969 | Stk30_j6         | mmu-miR-29b-3p  | -0.087 |
| TCONS_00028422 | Ctage5_j3        | mmu-miR-299-3p  | -0.063 |
| TCONS_00028442 | Dact1_j2         | mmu-miR-154-3p  | -0.349 |
| TCONS_00028454 | Ppm1a_j3         | mmu-let-7a-1-3p | -0.099 |
| TCONS_00028454 | Ppm1a_j3         | rno-let-7f-1*   | -0.067 |
| TCONS_00028455 | Ppm1a_j4         | mmu-let-7a-1-3p | -0.099 |
| TCONS_00028455 | Ppm1a_j4         | rno-let-7f-1*   | -0.067 |
| TCONS_00028512 | Rgs6_j3          | mmu-miR-466d-5p | -0.158 |
| TCONS_00028698 | Greb1_j3         | mmu-miR-544-3p  | -0.195 |
| TCONS_00028698 | Greb1_j3         | mmu-miR-154-3p  | -0.043 |
| TCONS_00028698 | Greb1_j3         | mmu-miR-466d-5p | -2.74  |
| TCONS_00028698 | Greb1_j3         | mmu-miR-299-3p  | -0.055 |
| TCONS_00028731 | F730043M19Rik_j1 | mmu-miR-298-5p  | -0.051 |
| TCONS_00028731 | F730043M19Rik_j1 | mmu-miR-467b-5p | -0.013 |
| TCONS_00028818 | Entpd5_j2        | mmu-miR-466d-5p | -0.443 |
| TCONS_00028818 | Entpd5_j2        | mmu-miR-19b-3p  | -0.308 |
| TCONS_00028818 | Entpd5_j2        | mmu-miR-298-5p  | -0.232 |
| TCONS_00028880 | Ccdc85c_j2       | mmu-miR-298-5p  | -0.2   |
| TCONS_00029269 | Etv1_j4          | mmu-miR-9-3p    | -0.034 |
| TCONS_00029391 | Unc79_j8         | mmu-let-7a-1-3p | -0.126 |
| TCONS_00029391 | Unc79_j8         | rno-let-7f-1*   | -0.084 |
| TCONS_00029456 | AW555464_j2      | mmu-miR-544-3p  | -0.115 |
| TCONS_00029503 | Atp6v1c2_j1      | mmu-miR-29b-3p  | -0.08  |
| TCONS_00029503 | Atp6v1c2_j1      | mmu-miR-467b-5p | -0.049 |
| TCONS_00029503 | Atp6v1c2_j1      | mmu-miR-298-5p  | -0.034 |
| TCONS_00029584 | Gphb5            | rno-let-7f-1*   | -0.063 |
| TCONS_00029584 | Gphb5            | mmu-let-7a-1-3p | -0.063 |
| TCONS_00029584 | Gphb5            | mmu-miR-299-3p  | -0.183 |
| TCONS_00029584 | Gphb5            | mmu-miR-467b-5p | -0.034 |
| TCONS_00029587 | Zbtb25_j2        | mmu-let-7a-1-3p | -0.069 |



|                |                   |                 |        |
|----------------|-------------------|-----------------|--------|
| TCONS_00029587 | Zbtb25_j2         | mmu-miR-298-5p  | -0.012 |
| TCONS_00029587 | Zbtb25_j2         | rno-let-7f-1*   | -0.072 |
| TCONS_00029587 | Zbtb25_j2         | mmu-miR-544-3p  | -0.153 |
| TCONS_00029587 | Zbtb25_j2         | mmu-miR-466d-5p | -2.03  |
| TCONS_00029631 | Vipar_j3          | mmu-miR-544-3p  | -0.033 |
| TCONS_00029631 | Vipar_j3          | mmu-miR-467b-5p | -0.112 |
| TCONS_00029631 | Vipar_j3          | mmu-miR-298-5p  | -0.178 |
| TCONS_00029631 | Vipar_j3          | mmu-miR-29b-3p  | -0.048 |
| TCONS_00029678 | Akt1_j1           | mmu-miR-298-5p  | -0.352 |
| TCONS_00029880 | Dtnb_j7           | mmu-miR-466d-5p | -0.238 |
| TCONS_00029880 | Dtnb_j7           | mmu-miR-19b-3p  | -0.305 |
| TCONS_00029880 | Dtnb_j7           | mmu-miR-299-3p  | -0.155 |
| TCONS_00029901 | Sdc1_j4           | mmu-miR-298-5p  | -0.32  |
| TCONS_00029901 | Sdc1_j4           | mmu-miR-19b-3p  | -0.223 |
| TCONS_00029901 | Sdc1_j4           | mmu-miR-467b-5p | -0.097 |
| TCONS_00029938 | XLOC_006612       | mmu-miR-299-3p  | -0.123 |
| TCONS_00029938 | XLOC_006612       | mmu-let-7a-1-3p | -0.191 |
| TCONS_00029938 | XLOC_006612       | rno-let-7f-1*   | -0.18  |
| TCONS_00030326 | Asb2_j1           | rno-let-7f-1*   | -0.07  |
| TCONS_00030326 | Asb2_j1           | mmu-miR-298-5p  | -0.203 |
| TCONS_00030326 | Asb2_j1           | mmu-let-7a-1-3p | -0.051 |
| TCONS_00030343 | Ccdc85c_j4        | mmu-miR-298-5p  | -0.2   |
| TCONS_00030615 | Sdc1_j6           | mmu-miR-467b-5p | -0.097 |
| TCONS_00030615 | Sdc1_j6           | mmu-miR-298-5p  | -0.32  |
| TCONS_00030615 | Sdc1_j6           | mmu-miR-19b-3p  | -0.223 |
| TCONS_00030730 | Srsf5_j2          | mmu-miR-467b-5p | -0.145 |
| TCONS_00030790 | Bdkrb2_j1         | mmu-miR-298-5p  | -0.089 |
| TCONS_00030892 | XLOC_006968       | mmu-miR-299-3p  | -0.101 |
| TCONS_00030969 | 4930447C04Rik_j12 | mmu-miR-466d-5p | -0.048 |
| TCONS_00030969 | 4930447C04Rik_j12 | mmu-miR-9-3p    | -0.078 |
| TCONS_00031322 | Zscan12           | mmu-miR-544-3p  | -0.337 |
| TCONS_00031322 | Zscan12           | mmu-miR-299-3p  | -0.478 |
| TCONS_00031353 | BC005537_j1       | mmu-miR-467b-5p | -0.059 |
| TCONS_00031353 | BC005537_j1       | mmu-miR-19b-3p  | -0.085 |
| TCONS_00031398 | Rreb1_j1          | mmu-miR-544-3p  | -0.1   |
| TCONS_00031398 | Rreb1_j1          | mmu-miR-9-3p    | -0.131 |
| TCONS_00031398 | Rreb1_j1          | mmu-miR-298-5p  | -0.123 |
| TCONS_00031430 | Rnf182            | mmu-miR-19b-3p  | -0.092 |
| TCONS_00031430 | Rnf182            | mmu-miR-299-3p  | -0.076 |
| TCONS_00031430 | Rnf182            | mmu-miR-154-3p  | -0.199 |
| TCONS_00031431 | Rnf182_j3         | mmu-miR-19b-3p  | -0.092 |
| TCONS_00031431 | Rnf182_j3         | mmu-miR-154-3p  | -0.199 |
| TCONS_00031431 | Rnf182_j3         | mmu-miR-299-3p  | -0.076 |
| TCONS_00031571 | Zfp369_j4         | mmu-miR-544-3p  | -0.106 |
| TCONS_00031571 | Zfp369_j4         | mmu-miR-298-5p  | -0.256 |
| TCONS_00031571 | Zfp369_j4         | mmu-miR-154-3p  | -0.278 |
| TCONS_00031658 | Hapln1_j2         | mmu-miR-29b-3p  | -0.088 |

|                |            |                 |        |
|----------------|------------|-----------------|--------|
| TCONS_00031658 | Hapln1_j2  | mmu-miR-9-3p    | -0.078 |
| TCONS_00031658 | Hapln1_j2  | mmu-miR-299-3p  | -0.15  |
| TCONS_00031658 | Hapln1_j2  | mmu-miR-544-3p  | -0.145 |
| TCONS_00031813 | Chrm3      | mmu-let-7a-1-3p | -0.071 |
| TCONS_00031813 | Chrm3      | mmu-miR-466d-5p | -0.245 |
| TCONS_00031813 | Chrm3      | rno-let-7f-1*   | -0.052 |
| TCONS_00031816 | Ryr2_j7    | mmu-miR-467b-5p | -0.113 |
| TCONS_00031816 | Ryr2_j7    | mmu-miR-544-3p  | -0.107 |
| TCONS_00031816 | Ryr2_j7    | mmu-miR-466d-5p | -0.008 |
| TCONS_00032032 | Pdlim7_j7  | mmu-miR-298-5p  | -0.519 |
| TCONS_00032032 | Pdlim7_j7  | mmu-miR-29b-3p  | -0.091 |
| TCONS_00032055 | Klhl3_j7   | mmu-miR-544-3p  | -0.044 |
| TCONS_00032055 | Klhl3_j7   | mmu-let-7a-1-3p | -0.106 |
| TCONS_00032055 | Klhl3_j7   | rno-let-7f-1*   | -0.115 |
| TCONS_00032343 | Ndufs4_j1  | mmu-miR-9-3p    | -0.163 |
| TCONS_00032343 | Ndufs4_j1  | mmu-miR-29b-3p  | -0.181 |
| TCONS_00032345 | Fst        | mmu-miR-9-3p    | -0.162 |
| TCONS_00032838 | Sykb_j7    | mmu-miR-298-5p  | -0.333 |
| TCONS_00032838 | Sykb_j7    | mmu-miR-299-3p  | -0.068 |
| TCONS_00033199 | Pdlim7_j2  | mmu-miR-298-5p  | -0.688 |
| TCONS_00033199 | Pdlim7_j2  | mmu-miR-29b-3p  | -0.085 |
| TCONS_00033223 | Gkap1_j7   | mmu-miR-467b-5p | -0.101 |
| TCONS_00033223 | Gkap1_j7   | mmu-miR-9-3p    | -0.023 |
| TCONS_00033223 | Gkap1_j7   | mmu-miR-298-5p  | -0.041 |
| TCONS_00033262 | Cntnap3_j2 | mmu-let-7a-1-3p | -0.154 |
| TCONS_00033262 | Cntnap3_j2 | mmu-miR-19b-3p  | -0.319 |
| TCONS_00033262 | Cntnap3_j2 | rno-let-7f-1*   | -0.154 |
| TCONS_00033295 | Nkd2       | mmu-miR-299-3p  | -0.002 |
| TCONS_00033717 | Larp4b_j1  | mmu-miR-29b-3p  | -0.302 |
| TCONS_00033717 | Larp4b_j1  | mmu-miR-466d-5p | -0.946 |
| TCONS_00033717 | Larp4b_j1  | mmu-miR-467b-5p | -0.018 |
| TCONS_00033717 | Larp4b_j1  | mmu-miR-9-3p    | -0.184 |
| TCONS_00033717 | Larp4b_j1  | mmu-miR-298-5p  | -0.227 |
| TCONS_00033816 | lars_j1    | mmu-miR-466d-5p | -2.27  |
| TCONS_00033980 | Ryr2_j14   | mmu-miR-467b-5p | -0.15  |
| TCONS_00033980 | Ryr2_j14   | mmu-miR-544-3p  | -0.128 |
| TCONS_00034020 | Cdkal1_j1  | mmu-miR-467b-5p | -0.056 |
| TCONS_00034047 | Atxn1_j5   | mmu-miR-466d-5p | -0.649 |
| TCONS_00034047 | Atxn1_j5   | mmu-miR-19b-3p  | -0.003 |
| TCONS_00034047 | Atxn1_j5   | mmu-miR-298-5p  | -0.031 |
| TCONS_00034098 | Klhl3_j1   | mmu-let-7a-1-3p | -0.105 |
| TCONS_00034098 | Klhl3_j1   | rno-let-7f-1*   | -0.114 |
| TCONS_00034098 | Klhl3_j1   | mmu-miR-544-3p  | -0.043 |
| TCONS_00034138 | Zfp712_j1  | mmu-miR-466d-5p | -1.14  |
| TCONS_00034138 | Zfp712_j1  | rno-let-7f-1*   | -0.149 |
| TCONS_00034138 | Zfp712_j1  | mmu-let-7a-1-3p | -0.191 |
| TCONS_00034140 | Zfp708_j8  | mmu-miR-544-3p  | -0.256 |

|                |             |                 |        |
|----------------|-------------|-----------------|--------|
| TCONS_00034167 | Ahrr_j5     | mmu-miR-466d-5p | -0.03  |
| TCONS_00034167 | Ahrr_j5     | mmu-miR-19b-3p  | -0.068 |
| TCONS_00034167 | Ahrr_j5     | mmu-miR-29b-3p  | -0.282 |
| TCONS_00034260 | Parp8_j3    | mmu-miR-467b-5p | -0.394 |
| TCONS_00034520 | Akr1c14_j1  | mmu-miR-19b-3p  | -0.345 |
| TCONS_00034520 | Akr1c14_j1  | mmu-let-7a-1-3p | -0.094 |
| TCONS_00034520 | Akr1c14_j1  | rno-let-7f-1*   | -0.085 |
| TCONS_00034563 | Mboat1_j2   | mmu-miR-298-5p  | -0.096 |
| TCONS_00034563 | Mboat1_j2   | mmu-miR-19b-3p  | -0.047 |
| TCONS_00034563 | Mboat1_j2   | mmu-miR-9-3p    | -0.059 |
| TCONS_00034615 | Sykb_j4     | mmu-miR-299-3p  | -0.071 |
| TCONS_00034615 | Sykb_j4     | mmu-miR-298-5p  | -0.338 |
| TCONS_00034705 | Zfp366_j2   | mmu-miR-299-3p  | -0.244 |
| TCONS_00034705 | Zfp366_j2   | mmu-miR-29b-3p  | -0.147 |
| TCONS_00034705 | Zfp366_j2   | mmu-miR-466d-5p | -0.189 |
| TCONS_00034749 | Ryr2_j8     | mmu-miR-2137    | -0.348 |
| TCONS_00034749 | Ryr2_j8     | mmu-miR-544-3p  | -0.107 |
| TCONS_00034749 | Ryr2_j8     | mmu-miR-467b-5p | -0.113 |
| TCONS_00034779 | BC025054_j1 | mmu-miR-9-3p    | -0.116 |
| TCONS_00034882 | Slc35d2_j7  | mmu-miR-299-3p  | -0.212 |
| TCONS_00034882 | Slc35d2_j7  | mmu-miR-298-5p  | -0.091 |
| TCONS_00034882 | Slc35d2_j7  | mmu-miR-154-3p  | -0.215 |
| TCONS_00034882 | Slc35d2_j7  | mmu-miR-466d-5p | -0.255 |
| TCONS_00034893 | Zfp458_j4   | mmu-miR-466d-5p | -0.073 |
| TCONS_00034900 | Zfp58_j1    | mmu-miR-544-3p  | -0.251 |
| TCONS_00035266 | Serpib9_j2  | mmu-miR-467b-5p | -0.086 |
| TCONS_00035266 | Serpib9_j2  | mmu-miR-466d-5p | -0.103 |
| TCONS_00035266 | Serpib9_j2  | rno-let-7f-1*   | -0.006 |
| TCONS_00035266 | Serpib9_j2  | mmu-miR-298-5p  | -0.276 |
| TCONS_00035266 | Serpib9_j2  | mmu-let-7a-1-3p | -0.006 |
| TCONS_00035266 | Serpib9_j2  | mmu-miR-9-3p    | -0.061 |
| TCONS_00035283 | Hivep1_j3   | mmu-let-7a-1-3p | -0.25  |
| TCONS_00035283 | Hivep1_j3   | rno-let-7f-1*   | -0.231 |
| TCONS_00035296 | Bicd2_j3    | mmu-miR-299-3p  | -0.039 |
| TCONS_00035296 | Bicd2_j3    | mmu-miR-29b-3p  | -0.131 |
| TCONS_00035296 | Bicd2_j3    | mmu-miR-466d-5p | -0.1   |
| TCONS_00035296 | Bicd2_j3    | mmu-miR-9-3p    | -0.152 |
| TCONS_00035296 | Bicd2_j3    | rno-let-7f-1*   | -0.041 |
| TCONS_00035296 | Bicd2_j3    | mmu-let-7a-1-3p | -0.058 |
| TCONS_00035566 | Cntnap3_j5  | mmu-let-7a-1-3p | -0.209 |
| TCONS_00035566 | Cntnap3_j5  | rno-let-7f-1*   | -0.209 |
| TCONS_00035662 | Fst_j1      | mmu-miR-9-3p    | -0.179 |
| TCONS_00035954 | Bicd2_j5    | mmu-miR-298-5p  | -0.196 |
| TCONS_00035954 | Bicd2_j5    | mmu-miR-466d-5p | -0.065 |
| TCONS_00035954 | Bicd2_j5    | mmu-miR-9-3p    | -0.032 |
| TCONS_00036155 | Uimc1_j3    | mmu-miR-466d-5p | -0.106 |
| TCONS_00036207 | Zfp595_j2   | mmu-miR-466d-5p | -0.059 |

|                |             |                 |        |
|----------------|-------------|-----------------|--------|
| TCONS_00036207 | Zfp595_j2   | mmu-miR-298-5p  | -0.055 |
| TCONS_00036252 | lqgap2_j3   | mmu-miR-466d-5p | -2.95  |
| TCONS_00036252 | lqgap2_j3   | mmu-miR-467b-5p | -0.091 |
| TCONS_00036252 | lqgap2_j3   | mmu-let-7a-1-3p | -0.094 |
| TCONS_00036252 | lqgap2_j3   | rno-let-7f-1*   | -0.087 |
| TCONS_00036263 | Mccc2_j1    | mmu-miR-154-3p  | -0.216 |
| TCONS_00036549 | Sec24c_j6   | mmu-miR-299-3p  | -0.01  |
| TCONS_00036576 | Zmiz1_j3    | mmu-miR-19b-3p  | -0.056 |
| TCONS_00036614 | Tmem110_j2  | mmu-miR-298-5p  | -0.172 |
| TCONS_00036640 | Galntl2     | mmu-miR-298-5p  | -0.112 |
| TCONS_00036640 | Galntl2     | mmu-miR-544-3p  | -0.224 |
| TCONS_00036640 | Galntl2     | mmu-miR-154-3p  | -0.11  |
| TCONS_00036650 | Ercc6       | mmu-miR-29b-3p  | -0.162 |
| TCONS_00036650 | Ercc6       | mmu-miR-298-5p  | -0.073 |
| TCONS_00036650 | Ercc6       | mmu-miR-19b-3p  | -0.04  |
| TCONS_00036677 | Gm8104_j3   | mmu-miR-544-3p  | -0.093 |
| TCONS_00036770 | Dcaf11_j4   | rno-let-7f-1*   | -0.039 |
| TCONS_00036770 | Dcaf11_j4   | mmu-let-7a-1-3p | -0.002 |
| TCONS_00036770 | Dcaf11_j4   | mmu-miR-466d-5p | -0.074 |
| TCONS_00036853 | Sox7        | mmu-miR-29b-3p  | -0.139 |
| TCONS_00036853 | Sox7        | mmu-miR-544-3p  | -0.065 |
| TCONS_00036853 | Sox7        | mmu-miR-466d-5p | -1.61  |
| TCONS_00036853 | Sox7        | mmu-miR-298-5p  | -0.032 |
| TCONS_00036864 | Zfp395_j3   | mmu-miR-467b-5p | -0.074 |
| TCONS_00036864 | Zfp395_j3   | mmu-miR-9-3p    | -0.03  |
| TCONS_00036864 | Zfp395_j3   | mmu-miR-19b-3p  | -0.03  |
| TCONS_00036867 | Scara5      | mmu-miR-154-3p  | -0.01  |
| TCONS_00036867 | Scara5      | mmu-miR-298-5p  | -0.165 |
| TCONS_00036879 | Stmn4       | mmu-miR-29b-3p  | -0.17  |
| TCONS_00036898 | Loxl2       | mmu-miR-467b-5p | -0.018 |
| TCONS_00036898 | Loxl2       | mmu-miR-298-5p  | -0.074 |
| TCONS_00036898 | Loxl2       | mmu-miR-29b-3p  | -0.434 |
| TCONS_00036899 | Loxl2       | mmu-miR-298-5p  | -0.074 |
| TCONS_00036899 | Loxl2       | mmu-miR-29b-3p  | -0.615 |
| TCONS_00036899 | Loxl2       | mmu-miR-467b-5p | -0.085 |
| TCONS_00036950 | Tsc22d1_j2  | rno-let-7f-1*   | -0.03  |
| TCONS_00036950 | Tsc22d1_j2  | mmu-let-7a-1-3p | -0.021 |
| TCONS_00036984 | XLOC_009838 | mmu-miR-544-3p  | -0.124 |
| TCONS_00036984 | XLOC_009838 | mmu-miR-29b-3p  | -0.057 |
| TCONS_00036984 | XLOC_009838 | mmu-miR-298-5p  | -0.459 |
| TCONS_00036988 | Scel_j3     | mmu-miR-467b-5p | -0.082 |
| TCONS_00036988 | Scel_j3     | mmu-miR-19b-3p  | -0.172 |
| TCONS_00037018 | Gpc6        | mmu-miR-298-5p  | -0.048 |
| TCONS_00037018 | Gpc6        | mmu-miR-154-3p  | -0.079 |
| TCONS_00037167 | Colq        | mmu-miR-19b-3p  | -0.065 |
| TCONS_00037167 | Colq        | mmu-miR-298-5p  | -0.052 |
| TCONS_00037184 | Gprin2_j1   | mmu-miR-9-3p    | -0.209 |

|                |                  |                 |        |
|----------------|------------------|-----------------|--------|
| TCONS_00037184 | Gprin2_j1        | mmu-miR-466d-5p | -0.047 |
| TCONS_00037184 | Gprin2_j1        | mmu-miR-29b-3p  | -0.089 |
| TCONS_00037184 | Gprin2_j1        | mmu-miR-298-5p  | -0.143 |
| TCONS_00037184 | Gprin2_j1        | mmu-miR-154-3p  | -0.099 |
| TCONS_00037184 | Gprin2_j1        | mmu-miR-19b-3p  | -0.131 |
| TCONS_00037258 | Exoc5            | mmu-miR-467b-5p | -0.03  |
| TCONS_00037258 | Exoc5            | mmu-miR-19b-3p  | -0.087 |
| TCONS_00037258 | Exoc5            | mmu-miR-29b-3p  | -0.072 |
| TCONS_00037385 | Mtmr9_j2         | mmu-miR-466d-5p | -0.002 |
| TCONS_00037385 | Mtmr9_j2         | mmu-miR-467b-5p | -0.041 |
| TCONS_00037385 | Mtmr9_j2         | mmu-miR-29b-3p  | -0.185 |
| TCONS_00037385 | Mtmr9_j2         | mmu-miR-544-3p  | -0.226 |
| TCONS_00037385 | Mtmr9_j2         | mmu-miR-19b-3p  | -0.271 |
| TCONS_00037499 | Naa16            | mmu-miR-298-5p  | -0.121 |
| TCONS_00037499 | Naa16            | mmu-miR-154-3p  | -0.157 |
| TCONS_00037508 | Diap3_j1         | mmu-miR-9-3p    | -0.075 |
| TCONS_00037508 | Diap3_j1         | mmu-miR-154-3p  | -0.121 |
| TCONS_00037508 | Diap3_j1         | mmu-miR-19b-3p  | -0.139 |
| TCONS_00037971 | Synpr_j6         | mmu-miR-9-3p    | -0.088 |
| TCONS_00038075 | Mmrn2_j2         | mmu-miR-544-3p  | -0.18  |
| TCONS_00038075 | Mmrn2_j2         | mmu-miR-466d-5p | -0.053 |
| TCONS_00038088 | Cdkn3_j1         | mmu-miR-466d-5p | -0.222 |
| TCONS_00038088 | Cdkn3_j1         | mmu-miR-298-5p  | -0.153 |
| TCONS_00038096 | Fbxo34_j3        | mmu-let-7a-1-3p | -0.191 |
| TCONS_00038096 | Fbxo34_j3        | mmu-miR-298-5p  | -0.084 |
| TCONS_00038096 | Fbxo34_j3        | mmu-miR-19b-3p  | -0.069 |
| TCONS_00038096 | Fbxo34_j3        | rno-let-7f-1*   | -0.141 |
| TCONS_00038274 | 1300010F03Rik_j3 | mmu-miR-298-5p  | -0.099 |
| TCONS_00038330 | Farp1_j2         | mmu-miR-299-3p  | -0.249 |
| TCONS_00038354 | Oxsm_j1          | mmu-miR-298-5p  | -0.17  |
| TCONS_00038354 | Oxsm_j1          | mmu-miR-466d-5p | -2.57  |
| TCONS_00038354 | Oxsm_j1          | rno-let-7f-1*   | -0.119 |
| TCONS_00038354 | Oxsm_j1          | mmu-let-7a-1-3p | -0.11  |
| TCONS_00038354 | Oxsm_j1          | mmu-miR-544-3p  | -0.039 |
| TCONS_00038400 | Stab1_j4         | mmu-miR-298-5p  | -0.263 |
| TCONS_00039043 | D14Abb1e_j1      | mmu-miR-467b-5p | -0.047 |
| TCONS_00039043 | D14Abb1e_j1      | mmu-miR-9-3p    | -0.172 |
| TCONS_00039090 | Gm8104_j4        | mmu-miR-544-3p  | -0.093 |
| TCONS_00039269 | Oxsm_j2          | mmu-miR-298-5p  | -0.17  |
| TCONS_00039269 | Oxsm_j2          | rno-let-7f-1*   | -0.119 |
| TCONS_00039269 | Oxsm_j2          | mmu-miR-466d-5p | -2.6   |
| TCONS_00039269 | Oxsm_j2          | mmu-let-7a-1-3p | -0.11  |
| TCONS_00039269 | Oxsm_j2          | mmu-miR-544-3p  | -0.04  |
| TCONS_00039352 | Ddhd1_j9         | mmu-miR-298-5p  | -0.106 |
| TCONS_00039352 | Ddhd1_j9         | mmu-miR-467b-5p | -0.212 |
| TCONS_00039352 | Ddhd1_j9         | mmu-miR-544-3p  | -0.27  |
| TCONS_00039374 | Zfp219           | rno-let-7f-1*   | -0.061 |

|                |            |                 |        |
|----------------|------------|-----------------|--------|
| TCONS_00039374 | Zfp219     | mmu-miR-298-5p  | -0.086 |
| TCONS_00039374 | Zfp219     | mmu-let-7a-1-3p | -0.071 |
| TCONS_00039448 | Fzd3_j1    | mmu-miR-544-3p  | -0.038 |
| TCONS_00039448 | Fzd3_j1    | mmu-miR-298-5p  | -0.071 |
| TCONS_00039448 | Fzd3_j1    | mmu-miR-466d-5p | -0.156 |
| TCONS_00039448 | Fzd3_j1    | mmu-miR-467b-5p | -0.024 |
| TCONS_00039448 | Fzd3_j1    | mmu-let-7a-1-3p | -0.071 |
| TCONS_00039448 | Fzd3_j1    | rno-let-7f-1*   | -0.052 |
| TCONS_00039448 | Fzd3_j1    | mmu-miR-299-3p  | -0.042 |
| TCONS_00039903 | Mmp14_j2   | mmu-miR-298-5p  | -0.094 |
| TCONS_00039903 | Mmp14_j2   | mmu-miR-466d-5p | -0.028 |
| TCONS_00039922 | Nfatc4     | mmu-miR-29b-3p  | -0.058 |
| TCONS_00040053 | Gng2_j2    | mmu-miR-299-3p  | -0.226 |
| TCONS_00040111 | Fam35a_j6  | mmu-miR-29b-3p  | -0.008 |
| TCONS_00040129 | Gnpnat1_j5 | rno-let-7f-1*   | -0.047 |
| TCONS_00040129 | Gnpnat1_j5 | mmu-miR-9-3p    | -0.155 |
| TCONS_00040129 | Gnpnat1_j5 | mmu-let-7a-1-3p | -0.044 |
| TCONS_00040129 | Gnpnat1_j5 | mmu-miR-467b-5p | -0.069 |
| TCONS_00040184 | Setdb2_j2  | mmu-miR-467b-5p | -0.11  |
| TCONS_00040268 | Tgds       | mmu-let-7a-1-3p | -0.237 |
| TCONS_00040268 | Tgds       | rno-let-7f-1*   | -0.216 |
| TCONS_00040268 | Tgds       | mmu-miR-544-3p  | -0.268 |
| TCONS_00040573 | Syt15_j6   | mmu-miR-298-5p  | -0.43  |
| TCONS_00040573 | Syt15_j6   | mmu-miR-466d-5p | -1.4   |
| TCONS_00040573 | Syt15_j6   | mmu-miR-154-3p  | -0.023 |
| TCONS_00040573 | Syt15_j6   | mmu-miR-299-3p  | -0.11  |
| TCONS_00040643 | Sacs       | mmu-miR-467b-5p | -0.112 |
| TCONS_00040643 | Sacs       | rno-let-7f-1*   | -0.012 |
| TCONS_00040643 | Sacs       | mmu-let-7a-1-3p | -0.04  |
| TCONS_00040770 | Kcnk5_j1   | mmu-miR-544-3p  | -0.027 |
| TCONS_00040802 | Stab1_j7   | mmu-miR-298-5p  | -0.196 |
| TCONS_00040835 | Cnih_j4    | mmu-miR-9-3p    | -0.075 |
| TCONS_00040837 | Wdhd1_j8   | mmu-miR-466d-5p | -0.06  |
| TCONS_00040837 | Wdhd1_j8   | rno-let-7f-1*   | -0.114 |
| TCONS_00040837 | Wdhd1_j8   | mmu-miR-544-3p  | -0.061 |
| TCONS_00040837 | Wdhd1_j8   | mmu-miR-298-5p  | -0.146 |
| TCONS_00040837 | Wdhd1_j8   | mmu-let-7a-1-3p | -0.123 |
| TCONS_00040934 | Klhl1      | mmu-miR-298-5p  | -0.12  |
| TCONS_00041267 | Cpne6_j2   | mmu-miR-298-5p  | -0.134 |
| TCONS_00041339 | Olfm4_j1   | mmu-miR-19b-3p  | -0.106 |
| TCONS_00041339 | Olfm4_j1   | mmu-miR-29b-3p  | -0.144 |
| TCONS_00041339 | Olfm4_j1   | mmu-miR-299-3p  | -0.077 |
| TCONS_00041339 | Olfm4_j1   | mmu-miR-544-3p  | -0.116 |
| TCONS_00041350 | Lmo7_j13   | mmu-miR-298-5p  | -0.151 |
| TCONS_00041382 | Itgbl1_j1  | mmu-miR-544-3p  | -0.07  |
| TCONS_00041382 | Itgbl1_j1  | mmu-miR-466d-5p | -0.211 |
| TCONS_00041382 | Itgbl1_j1  | mmu-miR-154-3p  | -0.11  |

|                |                  |                 |        |
|----------------|------------------|-----------------|--------|
| TCONS_00041382 | Itgbl1_j1        | mmu-miR-29b-3p  | -0.022 |
| TCONS_00041382 | Itgbl1_j1        | mmu-let-7a-1-3p | -0.072 |
| TCONS_00041382 | Itgbl1_j1        | rno-let-7f-1*   | -0.062 |
| TCONS_00041483 | Chd8_j3          | mmu-miR-298-5p  | -0.192 |
| TCONS_00041483 | Chd8_j3          | mmu-miR-154-3p  | -0.105 |
| TCONS_00041585 | Spry2_j1         | rno-let-7f-1*   | -0.11  |
| TCONS_00041585 | Spry2_j1         | mmu-miR-299-3p  | -0.201 |
| TCONS_00041585 | Spry2_j1         | mmu-let-7a-1-3p | -0.092 |
| TCONS_00041870 | 1110020G09Rik    | mmu-let-7a-1-3p | -0.233 |
| TCONS_00041870 | 1110020G09Rik    | rno-let-7f-1*   | -0.244 |
| TCONS_00041870 | 1110020G09Rik    | mmu-miR-154-3p  | -0.056 |
| TCONS_00041872 | 1110020G09Rik_j3 | mmu-miR-154-3p  | -0.09  |
| TCONS_00041968 | Baalc_j1         | mmu-miR-298-5p  | -0.161 |
| TCONS_00041974 | Rims2_j2         | mmu-miR-544-3p  | -0.02  |
| TCONS_00041974 | Rims2_j2         | mmu-miR-467b-5p | -0.023 |
| TCONS_00041974 | Rims2_j2         | mmu-miR-466d-5p | -0.004 |
| TCONS_00041974 | Rims2_j2         | mmu-miR-2137    | -0.198 |
| TCONS_00041984 | Zfpm2_j2         | rno-let-7f-1*   | -0.106 |
| TCONS_00041984 | Zfpm2_j2         | mmu-let-7a-1-3p | -0.084 |
| TCONS_00041984 | Zfpm2_j2         | mmu-miR-19b-3p  | -0.132 |
| TCONS_00042102 | Zfp623_j2        | mmu-miR-29b-3p  | -0.245 |
| TCONS_00042157 | Cyth4            | mmu-miR-298-5p  | -0.195 |
| TCONS_00042157 | Cyth4            | mmu-miR-466d-5p | -0.075 |
| TCONS_00042158 | Cyth4_j2         | mmu-miR-466d-5p | -0.114 |
| TCONS_00042158 | Cyth4_j2         | mmu-miR-298-5p  | -0.195 |
| TCONS_00042187 | Tomm22           | mmu-let-7a-1-3p | -0.003 |
| TCONS_00042187 | Tomm22           | mmu-miR-298-5p  | -0.447 |
| TCONS_00042187 | Tomm22           | mmu-miR-29b-3p  | -0.086 |
| TCONS_00042204 | XLOC_011139      | mmu-miR-298-5p  | -0.555 |
| TCONS_00042204 | XLOC_011139      | mmu-miR-29b-3p  | -0.138 |
| TCONS_00042239 | Tef_j2           | mmu-miR-29b-3p  | -0.096 |
| TCONS_00042239 | Tef_j2           | mmu-miR-298-5p  | -0.057 |
| TCONS_00042253 | Sept3_j3         | mmu-miR-19b-3p  | -0.081 |
| TCONS_00042253 | Sept3_j3         | mmu-miR-544-3p  | -0.079 |
| TCONS_00042253 | Sept3_j3         | mmu-miR-466d-5p | -0.067 |
| TCONS_00042267 | Pnpla3_j2        | mmu-miR-29b-3p  | -0.22  |
| TCONS_00042267 | Pnpla3_j2        | mmu-miR-298-5p  | -0.106 |
| TCONS_00042277 | Prr5_j1          | mmu-miR-154-3p  | -0.041 |
| TCONS_00042277 | Prr5_j1          | mmu-miR-298-5p  | -0.376 |
| TCONS_00042321 | Pim3_j1          | rno-let-7f-1*   | -0.071 |
| TCONS_00042321 | Pim3_j1          | mmu-let-7a-1-3p | -0.071 |
| TCONS_00042590 | Nipal2_j1        | mmu-miR-19b-3p  | -0.122 |
| TCONS_00042590 | Nipal2_j1        | mmu-miR-9-3p    | -0.05  |
| TCONS_00042590 | Nipal2_j1        | mmu-miR-466d-5p | -0.324 |
| TCONS_00042590 | Nipal2_j1        | mmu-miR-29b-3p  | -0.144 |
| TCONS_00042590 | Nipal2_j1        | mmu-miR-298-5p  | -0.067 |
| TCONS_00042590 | Nipal2_j1        | mmu-miR-544-3p  | -0.094 |

|                |            |                 |        |
|----------------|------------|-----------------|--------|
| TCONS_00042702 | Sla        | mmu-miR-9-3p    | -0.102 |
| TCONS_00042702 | Sla        | mmu-miR-466d-5p | -0.826 |
| TCONS_00042801 | Apol8      | mmu-miR-9-3p    | -0.06  |
| TCONS_00042801 | Apol8      | mmu-miR-544-3p  | -0.049 |
| TCONS_00042893 | Tob2_j2    | mmu-miR-466d-5p | -0.095 |
| TCONS_00042923 | Arfgap3    | mmu-miR-467b-5p | -0.155 |
| TCONS_00042923 | Arfgap3    | mmu-miR-466d-5p | -0.221 |
| TCONS_00042946 | Phf21b_j2  | mmu-miR-154-3p  | -0.177 |
| TCONS_00042946 | Phf21b_j2  | mmu-miR-298-5p  | -0.401 |
| TCONS_00042959 | Celsr1_j7  | mmu-miR-298-5p  | -0.009 |
| TCONS_00042969 | AK006138   | mmu-miR-29b-3p  | -0.329 |
| TCONS_00042969 | AK006138   | mmu-miR-154-3p  | -0.136 |
| TCONS_00043090 | Rnd1       | mmu-miR-29b-3p  | -0.078 |
| TCONS_00043090 | Rnd1       | mmu-miR-544-3p  | -0.166 |
| TCONS_00043116 | Fmnl3      | rno-let-7f-1*   | -0.139 |
| TCONS_00043116 | Fmnl3      | mmu-miR-467b-5p | -0.028 |
| TCONS_00043116 | Fmnl3      | mmu-let-7a-1-3p | -0.111 |
| TCONS_00043177 | Smug1_j2   | mmu-miR-29b-3p  | -0.269 |
| TCONS_00043177 | Smug1_j2   | mmu-miR-298-5p  | -0.086 |
| TCONS_00043609 | Spag1      | mmu-miR-298-5p  | -0.097 |
| TCONS_00043609 | Spag1      | mmu-miR-467b-5p | -0.069 |
| TCONS_00043609 | Spag1      | mmu-miR-466d-5p | -0.307 |
| TCONS_00043609 | Spag1      | mmu-miR-544-3p  | -0.187 |
| TCONS_00043625 | Rims2_j10  | mmu-miR-466d-5p | -2.5   |
| TCONS_00043625 | Rims2_j10  | mmu-miR-2137    | -0.198 |
| TCONS_00043672 | Elm1       | mmu-miR-544-3p  | -0.146 |
| TCONS_00043672 | Elm1       | mmu-miR-29b-3p  | -0.223 |
| TCONS_00043672 | Elm1       | mmu-miR-466d-5p | -0.029 |
| TCONS_00043866 | Prpf40b_j1 | mmu-miR-544-3p  | -0.057 |
| TCONS_00043866 | Prpf40b_j1 | mmu-miR-467b-5p | -0.133 |
| TCONS_00043868 | Smarcd1_j1 | mmu-miR-466d-5p | -0.056 |
| TCONS_00043868 | Smarcd1_j1 | mmu-miR-298-5p  | -0.038 |
| TCONS_00043868 | Smarcd1_j1 | mmu-miR-2137    | -0.05  |
| TCONS_00043868 | Smarcd1_j1 | mmu-miR-29b-3p  | -0.02  |
| TCONS_00044015 | Eif3e      | rno-let-7f-1*   | -0.049 |
| TCONS_00044015 | Eif3e      | mmu-let-7a-1-3p | -0.066 |
| TCONS_00044030 | Enpp2_j6   | mmu-miR-29b-3p  | -0.205 |
| TCONS_00044130 | Pvalb_j1   | mmu-miR-298-5p  | -0.095 |
| TCONS_00044172 | Pdgfb_j4   | mmu-miR-298-5p  | -0.292 |
| TCONS_00044172 | Pdgfb_j4   | mmu-miR-29b-3p  | -0.157 |
| TCONS_00044172 | Pdgfb_j4   | mmu-miR-19b-3p  | -0.071 |
| TCONS_00044172 | Pdgfb_j4   | mmu-miR-467b-5p | -0.008 |
| TCONS_00044172 | Pdgfb_j4   | mmu-miR-466d-5p | -0.03  |
| TCONS_00044605 | Fyb_j6     | mmu-miR-298-5p  | -0.3   |
| TCONS_00044605 | Fyb_j6     | mmu-miR-466d-5p | -0.031 |
| TCONS_00044605 | Fyb_j6     | mmu-miR-544-3p  | -0.069 |
| TCONS_00044606 | Rictor_j3  | mmu-miR-29b-3p  | -0.092 |



|                |             |                 |          |
|----------------|-------------|-----------------|----------|
| TCONS_00044606 | Rictor_j3   | mmu-miR-154-3p  | -0.156   |
| TCONS_00044606 | Rictor_j3   | mmu-miR-19b-3p  | -0.092   |
| TCONS_00044606 | Rictor_j3   | mmu-let-7a-1-3p | -0.264   |
| TCONS_00044606 | Rictor_j3   | mmu-miR-467b-5p | -0.023   |
| TCONS_00044606 | Rictor_j3   | rno-let-7f-1*   | -0.261   |
| TCONS_00044606 | Rictor_j3   | mmu-miR-544-3p  | 1.56E-17 |
| TCONS_00044659 | Rims2_j7    | mmu-miR-29b-3p  | -0.064   |
| TCONS_00044675 | Wdr67_j5    | mmu-let-7a-1-3p | -0.142   |
| TCONS_00044675 | Wdr67_j5    | rno-let-7f-1*   | -0.123   |
| TCONS_00044706 | Bai1_j2     | mmu-miR-29b-3p  | -0.044   |
| TCONS_00044706 | Bai1_j2     | mmu-miR-466d-5p | -0.112   |
| TCONS_00044706 | Bai1_j2     | mmu-miR-544-3p  | -0.089   |
| TCONS_00044762 | Gm10863_j4  | mmu-miR-544-3p  | -0.045   |
| TCONS_00044762 | Gm10863_j4  | mmu-miR-154-3p  | -0.153   |
| TCONS_00044762 | Gm10863_j4  | mmu-miR-298-5p  | -0.464   |
| TCONS_00044762 | Gm10863_j4  | mmu-miR-466d-5p | -0.418   |
| TCONS_00044782 | Tab1_j2     | mmu-miR-298-5p  | -0.251   |
| TCONS_00044797 | Csdc2_j1    | mmu-miR-154-3p  | -0.023   |
| TCONS_00044797 | Csdc2_j1    | mmu-miR-466d-5p | -0.112   |
| TCONS_00044797 | Csdc2_j1    | mmu-miR-29b-3p  | -0.101   |
| TCONS_00044806 | Parvg_j3    | mmu-miR-298-5p  | -0.248   |
| TCONS_00044846 | Gm4371_j4   | mmu-miR-9-3p    | -0.099   |
| TCONS_00044914 | Nckap1l     | mmu-miR-544-3p  | -0.081   |
| TCONS_00044974 | Angpt1_j1   | mmu-miR-544-3p  | -0.137   |
| TCONS_00045000 | Enpp2       | mmu-miR-29b-3p  | -0.201   |
| TCONS_00045009 | Fbxo32_j1   | mmu-let-7a-1-3p | -0.249   |
| TCONS_00045009 | Fbxo32_j1   | mmu-miR-19b-3p  | -0.341   |
| TCONS_00045009 | Fbxo32_j1   | mmu-miR-544-3p  | -0.135   |
| TCONS_00045009 | Fbxo32_j1   | mmu-miR-9-3p    | -0.289   |
| TCONS_00045009 | Fbxo32_j1   | rno-let-7f-1*   | -0.244   |
| TCONS_00045083 | Foxred2_j3  | mmu-miR-29b-3p  | -0.092   |
| TCONS_00045083 | Foxred2_j3  | mmu-miR-466d-5p | -0.039   |
| TCONS_00045085 | Pvalb       | mmu-miR-298-5p  | -0.106   |
| TCONS_00045250 | Racgap1_j1  | mmu-miR-9-3p    | -0.052   |
| TCONS_00045250 | Racgap1_j1  | mmu-miR-298-5p  | -0.147   |
| TCONS_00045525 | Fyb_j1      | mmu-miR-466d-5p | -0.031   |
| TCONS_00045525 | Fyb_j1      | mmu-miR-544-3p  | -0.069   |
| TCONS_00045525 | Fyb_j1      | mmu-miR-298-5p  | -0.299   |
| TCONS_00045595 | Col14a1_j4  | mmu-miR-298-5p  | -0.1     |
| TCONS_00045617 | Wisp1       | mmu-miR-466d-5p | -0.029   |
| TCONS_00045617 | Wisp1       | mmu-miR-29b-3p  | -0.219   |
| TCONS_00045617 | Wisp1       | mmu-miR-544-3p  | -0.143   |
| TCONS_00045679 | Triobp      | mmu-miR-19b-3p  | -0.017   |
| TCONS_00045679 | Triobp      | mmu-miR-544-3p  | -0.082   |
| TCONS_00045679 | Triobp      | mmu-miR-9-3p    | -0.094   |
| TCONS_00045679 | Triobp      | mmu-miR-298-5p  | -0.152   |
| TCONS_00045761 | XLOC_011224 | mmu-miR-298-5p  | -0.124   |

|                |             |                 |        |
|----------------|-------------|-----------------|--------|
| TCONS_00045761 | XLOC_011224 | rno-let-7f-1*   | -0.115 |
| TCONS_00045761 | XLOC_011224 | mmu-let-7a-1-3p | -0.126 |
| TCONS_00045761 | XLOC_011224 | mmu-miR-299-3p  | -0.084 |
| TCONS_00045761 | XLOC_011224 | mmu-miR-544-3p  | -0.087 |
| TCONS_00045761 | XLOC_011224 | mmu-miR-9-3p    | -0.111 |
| TCONS_00045800 | Atf1_j2     | mmu-miR-544-3p  | -0.159 |
| TCONS_00045800 | Atf1_j2     | mmu-miR-9-3p    | -0.014 |
| TCONS_00045836 | Nckap1_j2   | mmu-miR-544-3p  | -0.086 |
| TCONS_00045894 | Enpp2       | mmu-miR-29b-3p  | -0.212 |
| TCONS_00046021 | Ttl12_j4    | mmu-miR-298-5p  | -0.219 |
| TCONS_00046021 | Ttl12_j4    | mmu-miR-544-3p  | -0.172 |
| TCONS_00046021 | Ttl12_j4    | mmu-miR-29b-3p  | -0.114 |
| TCONS_00046023 | Scube1      | mmu-miR-298-5p  | -0.399 |
| TCONS_00046091 | Zfp641_j1   | mmu-miR-466d-5p | -4.69  |
| TCONS_00046091 | Zfp641_j1   | mmu-miR-29b-3p  | -0.131 |
| TCONS_00046091 | Zfp641_j1   | mmu-miR-544-3p  | -0.038 |
| TCONS_00046091 | Zfp641_j1   | mmu-miR-9-3p    | -0.002 |
| TCONS_00046446 | Bai1        | mmu-miR-29b-3p  | -0.13  |
| TCONS_00046446 | Bai1        | mmu-miR-544-3p  | -0.169 |
| TCONS_00046446 | Bai1        | mmu-miR-466d-5p | -0.118 |
| TCONS_00046446 | Bai1        | mmu-miR-299-3p  | -0.107 |
| TCONS_00046533 | Mchr1_j1    | mmu-miR-544-3p  | -0.074 |
| TCONS_00046650 | Nipbl_j3    | mmu-miR-544-3p  | -0.205 |
| TCONS_00046762 | Dgat1_j2    | mmu-miR-544-3p  | -0.101 |
| TCONS_00046762 | Dgat1_j2    | mmu-miR-298-5p  | -0.037 |
| TCONS_00046762 | Dgat1_j2    | mmu-miR-29b-3p  | -0.014 |
| TCONS_00046798 | Mkl1_j2     | mmu-miR-544-3p  | -0.05  |
| TCONS_00046798 | Mkl1_j2     | mmu-miR-299-3p  | -0.057 |
| TCONS_00046824 | Celsr1_j2   | mmu-miR-298-5p  | -0.415 |
| TCONS_00046824 | Celsr1_j2   | mmu-miR-19b-3p  | -0.056 |
| TCONS_00046824 | Celsr1_j2   | mmu-miR-466d-5p | -0.022 |
| TCONS_00046855 | Prickle1_j4 | mmu-let-7a-1-3p | -0.018 |
| TCONS_00046855 | Prickle1_j4 | rno-let-7f-1*   | -0.018 |
| TCONS_00047089 | Fyb_j3      | mmu-miR-298-5p  | -0.302 |
| TCONS_00047089 | Fyb_j3      | mmu-miR-544-3p  | -0.069 |
| TCONS_00047089 | Fyb_j3      | mmu-miR-466d-5p | -0.031 |
| TCONS_00047167 | Fer1l6_j1   | mmu-miR-544-3p  | -0.094 |
| TCONS_00047179 | Pvt1_j11    | mmu-miR-298-5p  | -0.201 |
| TCONS_00047438 | Zfat_j7     | mmu-miR-29b-3p  | -0.111 |
| TCONS_00047474 | Arhgap39_j6 | mmu-miR-299-3p  | -0.118 |
| TCONS_00047474 | Arhgap39_j6 | mmu-miR-298-5p  | -0.013 |
| TCONS_00047582 | Scaf11_j5   | mmu-miR-19b-3p  | -0.109 |
| TCONS_00047582 | Scaf11_j5   | mmu-miR-466d-5p | -0.364 |
| TCONS_00047625 | Fmnl3       | rno-let-7f-1*   | -0.14  |
| TCONS_00047625 | Fmnl3       | mmu-miR-467b-5p | -0.029 |
| TCONS_00047625 | Fmnl3       | mmu-let-7a-1-3p | -0.112 |
| TCONS_00047953 | Psm2        | mmu-miR-467b-5p | -0.19  |

|                |               |                 |        |
|----------------|---------------|-----------------|--------|
| TCONS_00047953 | Psmid2        | mmu-miR-298-5p  | -0.142 |
| TCONS_00048017 | Dlg1_j1       | mmu-miR-9-3p    | -0.19  |
| TCONS_00048017 | Dlg1_j1       | mmu-miR-466d-5p | -0.326 |
| TCONS_00048017 | Dlg1_j1       | mmu-miR-298-5p  | -0.17  |
| TCONS_00048017 | Dlg1_j1       | mmu-miR-19b-3p  | -0.199 |
| TCONS_00048047 | Snx4_j2       | mmu-miR-29b-3p  | -0.236 |
| TCONS_00048047 | Snx4_j2       | mmu-miR-544-3p  | -0.093 |
| TCONS_00048047 | Snx4_j2       | mmu-miR-298-5p  | -0.162 |
| TCONS_00048054 | Itgb5_j1      | mmu-miR-19b-3p  | -0.079 |
| TCONS_00048061 | Ptplb         | rno-let-7f-1*   | -0.041 |
| TCONS_00048061 | Ptplb         | mmu-let-7a-1-3p | -0.05  |
| TCONS_00048061 | Ptplb         | mmu-miR-466d-5p | -0.117 |
| TCONS_00048087 | Popdc2_j3     | mmu-miR-9-3p    | -0.087 |
| TCONS_00048210 | 4931408A02Rik | mmu-miR-299-3p  | -0.005 |
| TCONS_00048210 | 4931408A02Rik | mmu-miR-466d-5p | -3.6   |
| TCONS_00048328 | Myh11_j3      | mmu-miR-466d-5p | -0.084 |
| TCONS_00048513 | Cd86          | mmu-miR-19b-3p  | -0.098 |
| TCONS_00048513 | Cd86          | mmu-miR-544-3p  | -0.073 |
| TCONS_00048513 | Cd86          | mmu-miR-467b-5p | -0.119 |
| TCONS_00048514 | Slc15a2       | mmu-miR-9-3p    | -0.423 |
| TCONS_00048516 | Fbxo40        | mmu-miR-29b-3p  | -0.177 |
| TCONS_00048516 | Fbxo40        | mmu-miR-466d-5p | -0.777 |
| TCONS_00048516 | Fbxo40        | mmu-miR-544-3p  | -0.009 |
| TCONS_00048691 | Scaf4         | mmu-miR-9-3p    | -0.121 |
| TCONS_00048691 | Scaf4         | mmu-miR-19b-3p  | -0.208 |
| TCONS_00048740 | Erg_j3        | mmu-miR-154-3p  | -0.123 |
| TCONS_00049367 | Bdh1          | mmu-miR-466d-5p | -2.32  |
| TCONS_00049367 | Bdh1          | mmu-miR-29b-3p  | -0.576 |
| TCONS_00049367 | Bdh1          | mmu-miR-9-3p    | -0.019 |
| TCONS_00049367 | Bdh1          | mmu-miR-299-3p  | -0.039 |
| TCONS_00049372 | Pigz_j1       | mmu-miR-298-5p  | -0.25  |
| TCONS_00049372 | Pigz_j1       | mmu-miR-299-3p  | -0.195 |
| TCONS_00049525 | Ifnar1_j1     | mmu-miR-299-3p  | -0.029 |
| TCONS_00049525 | Ifnar1_j1     | mmu-miR-298-5p  | -0.093 |
| TCONS_00049525 | Ifnar1_j1     | mmu-miR-544-3p  | -0.265 |
| TCONS_00049525 | Ifnar1_j1     | mmu-miR-466d-5p | -0.192 |
| TCONS_00049597 | Dexi_j1       | mmu-miR-467b-5p | -0.017 |
| TCONS_00049597 | Dexi_j1       | mmu-miR-298-5p  | -0.093 |
| TCONS_00049608 | Parn_j2       | mmu-miR-467b-5p | -0.061 |
| TCONS_00049772 | Cd96_j2       | mmu-miR-298-5p  | -0.207 |
| TCONS_00050224 | Snai2         | mmu-miR-154-3p  | -0.098 |
| TCONS_00050224 | Snai2         | mmu-let-7a-1-3p | -0.045 |
| TCONS_00050224 | Snai2         | rno-let-7f-1*   | -0.052 |
| TCONS_00050224 | Snai2         | mmu-miR-466d-5p | -5.88  |
| TCONS_00050294 | Hrasls_j2     | mmu-miR-544-3p  | -0.042 |
| TCONS_00050294 | Hrasls_j2     | mmu-miR-29b-3p  | -0.191 |
| TCONS_00050294 | Hrasls_j2     | mmu-miR-298-5p  | -0.098 |

|                |             |                 |        |
|----------------|-------------|-----------------|--------|
| TCONS_00050311 | Osbpl11_j2  | mmu-miR-29b-3p  | -0.11  |
| TCONS_00050311 | Osbpl11_j2  | mmu-miR-466d-5p | -0.295 |
| TCONS_00050311 | Osbpl11_j2  | mmu-miR-19b-3p  | -0.117 |
| TCONS_00050395 | Robo1       | mmu-miR-29b-3p  | -0.359 |
| TCONS_00050395 | Robo1       | mmu-miR-544-3p  | -0.125 |
| TCONS_00050395 | Robo1       | mmu-miR-466d-5p | -0.112 |
| TCONS_00050409 | AK090163_j2 | mmu-miR-19b-3p  | -0.024 |
| TCONS_00050409 | AK090163_j2 | mmu-miR-299-3p  | -0.132 |
| TCONS_00050409 | AK090163_j2 | mmu-miR-544-3p  | -0.002 |
| TCONS_00050409 | AK090163_j2 | mmu-miR-466d-5p | -0.071 |
| TCONS_00050452 | Slx4_j9     | mmu-miR-298-5p  | -0.355 |
| TCONS_00050456 | Crebbp_j1   | mmu-miR-298-5p  | -0.102 |
| TCONS_00050456 | Crebbp_j1   | mmu-miR-466d-5p | -0.183 |
| TCONS_00050456 | Crebbp_j1   | mmu-miR-19b-3p  | -0.072 |
| TCONS_00050484 | Parn_j4     | mmu-miR-467b-5p | -0.061 |
| TCONS_00050496 | Fgd4_j5     | mmu-miR-9-3p    | -0.14  |
| TCONS_00050534 | Igf2bp2     | mmu-miR-466d-5p | -0.295 |
| TCONS_00050544 | Tbccd1_j1   | mmu-miR-466d-5p | -0.299 |
| TCONS_00050544 | Tbccd1_j1   | mmu-miR-298-5p  | -0.083 |
| TCONS_00050544 | Tbccd1_j1   | rno-let-7f-1*   | -0.257 |
| TCONS_00050544 | Tbccd1_j1   | mmu-miR-9-3p    | -0.129 |
| TCONS_00050544 | Tbccd1_j1   | mmu-let-7a-1-3p | -0.278 |
| TCONS_00050588 | Slc15a2_j3  | mmu-miR-9-3p    | -0.411 |
| TCONS_00050605 | Gramd1c_j2  | mmu-miR-466d-5p | -0.115 |
| TCONS_00050666 | Mrpl39_j1   | mmu-miR-9-3p    | -0.036 |
| TCONS_00050674 | Tiam1_j1    | mmu-miR-9-3p    | -0.246 |
| TCONS_00050674 | Tiam1_j1    | mmu-miR-29b-3p  | -0.21  |
| TCONS_00050674 | Tiam1_j1    | mmu-miR-466d-5p | -0.034 |
| TCONS_00050674 | Tiam1_j1    | rno-let-7f-1*   | -0.028 |
| TCONS_00050674 | Tiam1_j1    | mmu-let-7a-1-3p | -0.028 |
| TCONS_00051023 | Snx29_j8    | mmu-miR-19b-3p  | -0.176 |
| TCONS_00051023 | Snx29_j8    | mmu-miR-544-3p  | -0.145 |
| TCONS_00051040 | Pkp2_j2     | mmu-miR-544-3p  | -0.141 |
| TCONS_00051040 | Pkp2_j2     | mmu-miR-299-3p  | -0.093 |
| TCONS_00051040 | Pkp2_j2     | mmu-miR-467b-5p | -0.098 |
| TCONS_00051040 | Pkp2_j2     | mmu-miR-298-5p  | -0.143 |
| TCONS_00051041 | Pkp2_j4     | mmu-miR-467b-5p | -0.138 |
| TCONS_00051048 | Lztr1_j4    | mmu-miR-544-3p  | -0.124 |
| TCONS_00051048 | Lztr1_j4    | mmu-miR-9-3p    | -0.079 |
| TCONS_00051048 | Lztr1_j4    | mmu-miR-19b-3p  | -0.27  |
| TCONS_00051097 | Ubxn7_j2    | mmu-miR-29b-3p  | -0.157 |
| TCONS_00051097 | Ubxn7_j2    | mmu-miR-466d-5p | -0.143 |
| TCONS_00051097 | Ubxn7_j2    | mmu-miR-19b-3p  | -0.01  |
| TCONS_00051097 | Ubxn7_j2    | mmu-miR-544-3p  | -0.028 |
| TCONS_00051097 | Ubxn7_j2    | mmu-miR-298-5p  | -0.104 |
| TCONS_00051097 | Ubxn7_j2    | mmu-miR-467b-5p | -0.006 |
| TCONS_00051100 | Snx4        | mmu-miR-544-3p  | -0.096 |

|                |                  |                 |        |
|----------------|------------------|-----------------|--------|
| TCONS_00051100 | Snx4             | mmu-miR-298-5p  | -0.162 |
| TCONS_00051100 | Snx4             | mmu-miR-29b-3p  | -0.236 |
| TCONS_00051123 | Tmem39a_j8       | mmu-miR-298-5p  | -0.19  |
| TCONS_00051155 | Senp7            | mmu-miR-299-3p  | -0.091 |
| TCONS_00051199 | Ifngr2_j1        | mmu-miR-29b-3p  | -0.17  |
| TCONS_00051225 | Tcfap4_j2        | mmu-miR-467b-5p | -0.115 |
| TCONS_00051264 | Liph_j3          | mmu-miR-466d-5p | -0.079 |
| TCONS_00051264 | Liph_j3          | mmu-miR-298-5p  | -0.176 |
| TCONS_00051265 | Liph_j1          | mmu-miR-466d-5p | -0.054 |
| TCONS_00051265 | Liph_j1          | mmu-miR-298-5p  | -0.144 |
| TCONS_00051265 | Liph_j1          | mmu-miR-154-3p  | -0.057 |
| TCONS_00051297 | Lsg1_j1          | mmu-miR-544-3p  | -0.081 |
| TCONS_00051394 | Urb1_j7          | mmu-miR-2137    | -0.224 |
| TCONS_00051394 | Urb1_j7          | mmu-miR-544-3p  | -0.03  |
| TCONS_00051394 | Urb1_j7          | mmu-miR-19b-3p  | -0.006 |
| TCONS_00051394 | Urb1_j7          | mmu-miR-299-3p  | -0.076 |
| TCONS_00051394 | Urb1_j7          | mmu-miR-298-5p  | -0.059 |
| TCONS_00051639 | Abcc1_j2         | mmu-miR-154-3p  | -0.238 |
| TCONS_00051749 | 2610015P09Rik_j6 | mmu-miR-466d-5p | -0.076 |
| TCONS_00051839 | Emp2_j1          | mmu-miR-29b-3p  | -0.285 |
| TCONS_00051917 | Ppp1r2_j3        | mmu-miR-9-3p    | -0.044 |
| TCONS_00051917 | Ppp1r2_j3        | mmu-let-7a-1-3p | -0.193 |
| TCONS_00051917 | Ppp1r2_j3        | rno-let-7f-1*   | -0.193 |
| TCONS_00051917 | Ppp1r2_j3        | mmu-miR-19b-3p  | -0.214 |
| TCONS_00051956 | 5330426P16Rik_j2 | mmu-miR-544-3p  | -0.149 |
| TCONS_00051956 | 5330426P16Rik_j2 | mmu-let-7a-1-3p | -0.058 |
| TCONS_00051956 | 5330426P16Rik_j2 | rno-let-7f-1*   | -0.054 |
| TCONS_00052252 | Sec14l5_j9       | mmu-miR-299-3p  | -0.072 |
| TCONS_00052252 | Sec14l5_j9       | mmu-miR-466d-5p | -0.095 |
| TCONS_00052302 | Dvl3_j3          | mmu-miR-298-5p  | -0.212 |
| TCONS_00052302 | Dvl3_j3          | mmu-miR-466d-5p | -1.07  |
| TCONS_00052364 | Mylk_j7          | mmu-miR-467b-5p | -0.36  |
| TCONS_00052367 | Sema5b_j1        | mmu-miR-466d-5p | -5.43  |
| TCONS_00052367 | Sema5b_j1        | mmu-miR-298-5p  | -0.294 |
| TCONS_00052415 | Robo1_j4         | mmu-miR-29b-3p  | -0.505 |
| TCONS_00052415 | Robo1_j4         | mmu-miR-466d-5p | -0.116 |
| TCONS_00052462 | Mx2_j1           | mmu-miR-544-3p  | -0.094 |
| TCONS_00052462 | Mx2_j1           | mmu-miR-298-5p  | -0.282 |
| TCONS_00052466 | Crebbp_j2        | mmu-miR-466d-5p | -0.183 |
| TCONS_00052466 | Crebbp_j2        | mmu-miR-19b-3p  | -0.076 |
| TCONS_00052466 | Crebbp_j2        | mmu-miR-298-5p  | -0.106 |
| TCONS_00052634 | XLOC_012964      | mmu-miR-467b-5p | -0.062 |
| TCONS_00052906 | Park2_j2         | mmu-miR-466d-5p | -0.483 |
| TCONS_00052906 | Park2_j2         | mmu-miR-298-5p  | -0.856 |
| TCONS_00052906 | Park2_j2         | mmu-miR-29b-3p  | -0.253 |
| TCONS_00053176 | Rgl2_j9          | mmu-miR-19b-3p  | -0.016 |
| TCONS_00053176 | Rgl2_j9          | mmu-miR-298-5p  | -0.366 |

|                |              |                 |        |
|----------------|--------------|-----------------|--------|
| TCONS_00053251 | Cchcr1       | mmu-miR-298-5p  | -0.172 |
| TCONS_00053354 | Trerf1_j5    | mmu-miR-19b-3p  | -0.166 |
| TCONS_00053354 | Trerf1_j5    | mmu-miR-298-5p  | -0.144 |
| TCONS_00053354 | Trerf1_j5    | mmu-miR-544-3p  | -0.097 |
| TCONS_00053370 | Trem2        | mmu-miR-298-5p  | -0.134 |
| TCONS_00053441 | Emr1         | mmu-miR-9-3p    | -0.076 |
| TCONS_00053442 | Cntnap5c_j3  | mmu-miR-544-3p  | -0.165 |
| TCONS_00053468 | L3mbtl4_j1   | mmu-miR-154-3p  | -0.098 |
| TCONS_00053468 | L3mbtl4_j1   | mmu-miR-298-5p  | -0.016 |
| TCONS_00053542 | Galm         | mmu-miR-466d-5p | -0.129 |
| TCONS_00053542 | Galm         | mmu-miR-9-3p    | -0.062 |
| TCONS_00053570 | Ppm1b_j1     | mmu-miR-154-3p  | -0.067 |
| TCONS_00053570 | Ppm1b_j1     | mmu-miR-544-3p  | -0.306 |
| TCONS_00053570 | Ppm1b_j1     | mmu-let-7a-1-3p | -0.138 |
| TCONS_00053570 | Ppm1b_j1     | rno-let-7f-1*   | -0.11  |
| TCONS_00053576 | Rhoq         | mmu-miR-467b-5p | -0.19  |
| TCONS_00053576 | Rhoq         | mmu-miR-299-3p  | -0.18  |
| TCONS_00053576 | Rhoq         | mmu-miR-544-3p  | -0.142 |
| TCONS_00053591 | Foxn2        | mmu-miR-544-3p  | -0.275 |
| TCONS_00053602 | Pisd-ps2_j10 | mmu-miR-298-5p  | -0.155 |
| TCONS_00053770 | Fam173a_j4   | mmu-miR-2137    | -0.307 |
| TCONS_00053770 | Fam173a_j4   | mmu-miR-298-5p  | -0.194 |
| TCONS_00053774 | Rhot2_j5     | mmu-miR-298-5p  | -0.181 |
| TCONS_00053774 | Rhot2_j5     | mmu-miR-29b-3p  | -0.294 |
| TCONS_00053830 | Fkbp5_j3     | mmu-miR-466d-5p | -0.248 |
| TCONS_00053830 | Fkbp5_j3     | mmu-miR-298-5p  | -0.084 |
| TCONS_00053830 | Fkbp5_j3     | mmu-miR-544-3p  | -0.162 |
| TCONS_00053889 | Zfp870_j3    | mmu-miR-466d-5p | -0.191 |
| TCONS_00053889 | Zfp870_j3    | mmu-miR-299-3p  | -0.011 |
| TCONS_00054019 | Spats1       | mmu-miR-19b-3p  | -0.15  |
| TCONS_00054019 | Spats1       | mmu-miR-466d-5p | -0.066 |
| TCONS_00054019 | Spats1       | mmu-miR-299-3p  | -0.088 |
| TCONS_00054019 | Spats1       | mmu-miR-298-5p  | -0.247 |
| TCONS_00054019 | Spats1       | mmu-miR-29b-3p  | -0.086 |
| TCONS_00054034 | Capn11_j5    | mmu-miR-2137    | -0.322 |
| TCONS_00054201 | Tgif1        | mmu-miR-19b-3p  | -0.379 |
| TCONS_00054202 | Tgif1        | mmu-miR-19b-3p  | -0.379 |
| TCONS_00054241 | Eif2ak2_j3   | mmu-miR-544-3p  | -0.126 |
| TCONS_00054241 | Eif2ak2_j3   | mmu-miR-299-3p  | -0.023 |
| TCONS_00054241 | Eif2ak2_j3   | mmu-miR-466d-5p | -0.034 |
| TCONS_00054246 | Cyp1b1       | mmu-miR-544-3p  | -0.251 |
| TCONS_00054247 | Cyp1b1_j2    | mmu-miR-544-3p  | -0.251 |
| TCONS_00054248 | Cyp1b1_j1    | mmu-miR-544-3p  | -0.251 |
| TCONS_00054261 | Cdkl4_j3     | mmu-miR-467b-5p | -0.418 |
| TCONS_00054746 | XLOC_013764  | mmu-miR-154-3p  | -0.039 |
| TCONS_00054783 | Tcp1         | mmu-miR-298-5p  | -0.177 |
| TCONS_00054783 | Tcp1         | mmu-miR-466d-5p | -0.059 |

|                |                  |                 |        |
|----------------|------------------|-----------------|--------|
| TCONS_00055102 | Trerf1_j8        | mmu-miR-544-3p  | -0.102 |
| TCONS_00055102 | Trerf1_j8        | mmu-miR-298-5p  | -0.153 |
| TCONS_00055102 | Trerf1_j8        | mmu-miR-19b-3p  | -0.171 |
| TCONS_00055247 | Rhoq_j7          | mmu-miR-544-3p  | -0.143 |
| TCONS_00055247 | Rhoq_j7          | mmu-miR-467b-5p | -0.191 |
| TCONS_00055247 | Rhoq_j7          | mmu-miR-299-3p  | -0.18  |
| TCONS_00055370 | Tbc1d24_j6       | mmu-miR-298-5p  | -0.072 |
| TCONS_00055470 | Akap8l_j9        | mmu-miR-298-5p  | -0.466 |
| TCONS_00055597 | Klhdc3_j2        | mmu-miR-29b-3p  | -0.141 |
| TCONS_00056159 | Narfl_j1         | mmu-miR-466d-5p | -0.174 |
| TCONS_00056159 | Narfl_j1         | mmu-miR-299-3p  | -0.495 |
| TCONS_00056344 | Trerf1_j1        | mmu-miR-19b-3p  | -0.171 |
| TCONS_00056344 | Trerf1_j1        | mmu-miR-298-5p  | -0.153 |
| TCONS_00056344 | Trerf1_j1        | mmu-miR-544-3p  | -0.102 |
| TCONS_00056450 | Rasgrp3_j1       | mmu-miR-298-5p  | -0.183 |
| TCONS_00056450 | Rasgrp3_j1       | mmu-miR-9-3p    | -0.075 |
| TCONS_00056450 | Rasgrp3_j1       | mmu-miR-154-3p  | -0.073 |
| TCONS_00056450 | Rasgrp3_j1       | mmu-miR-299-3p  | -0.201 |
| TCONS_00056471 | Rhoq_j4          | mmu-miR-466d-5p | -0.13  |
| TCONS_00056471 | Rhoq_j4          | mmu-miR-19b-3p  | -0.039 |
| TCONS_00056471 | Rhoq_j4          | mmu-let-7a-1-3p | -0.036 |
| TCONS_00056471 | Rhoq_j4          | mmu-miR-299-3p  | -0.163 |
| TCONS_00056471 | Rhoq_j4          | rno-let-7f-1*   | -0.042 |
| TCONS_00056792 | 1110012J17Rik_j1 | mmu-miR-19b-3p  | -0.134 |
| TCONS_00056792 | 1110012J17Rik_j1 | mmu-miR-2137    | -0.353 |
| TCONS_00056822 | Atl2_j1          | mmu-let-7a-1-3p | -0.135 |
| TCONS_00056822 | Atl2_j1          | rno-let-7f-1*   | -0.153 |
| TCONS_00057293 | Tbc1d22b_j1      | mmu-miR-466d-5p | -0.11  |
| TCONS_00057518 | Rhoq_j1          | mmu-miR-544-3p  | -0.142 |
| TCONS_00057518 | Rhoq_j1          | mmu-miR-467b-5p | -0.191 |
| TCONS_00057518 | Rhoq_j1          | mmu-miR-299-3p  | -0.18  |
| TCONS_00057688 | Vars2_j4         | mmu-miR-19b-3p  | -0.085 |
| TCONS_00057752 | Pot1b_j3         | mmu-miR-544-3p  | -0.147 |
| TCONS_00057752 | Pot1b_j3         | mmu-miR-466d-5p | -0.078 |
| TCONS_00057752 | Pot1b_j3         | mmu-miR-9-3p    | -0.17  |
| TCONS_00057761 | Sema6b_j1        | mmu-miR-298-5p  | -0.001 |
| TCONS_00057761 | Sema6b_j1        | mmu-miR-19b-3p  | -0.058 |
| TCONS_00057761 | Sema6b_j1        | mmu-miR-544-3p  | -0.09  |
| TCONS_00057761 | Sema6b_j1        | mmu-miR-2137    | -0.194 |
| TCONS_00057761 | Sema6b_j1        | mmu-miR-466d-5p | -0.095 |
| TCONS_00058128 | Zfp943_j1        | mmu-miR-298-5p  | -0.178 |
| TCONS_00058128 | Zfp943_j1        | rno-let-7f-1*   | -0.119 |
| TCONS_00058128 | Zfp943_j1        | mmu-let-7a-1-3p | -0.119 |
| TCONS_00058128 | Zfp943_j1        | mmu-miR-466d-5p | -0.07  |
| TCONS_00058150 | Tpsb2            | mmu-miR-299-3p  | -0.111 |
| TCONS_00058282 | Nfkbie_j2        | mmu-miR-9-3p    | -0.079 |
| TCONS_00058282 | Nfkbie_j2        | mmu-miR-466d-5p | -0.329 |

|                |              |                 |        |
|----------------|--------------|-----------------|--------|
| TCONS_00058315 | Tnfaip811_j1 | mmu-miR-544-3p  | -0.064 |
| TCONS_00058442 | Gm16052_j3   | mmu-miR-466d-5p | -0.116 |
| TCONS_00058442 | Gm16052_j3   | mmu-let-7a-1-3p | -0.089 |
| TCONS_00058442 | Gm16052_j3   | mmu-miR-298-5p  | -0.073 |
| TCONS_00058442 | Gm16052_j3   | rno-let-7f-1*   | -0.089 |
| TCONS_00058442 | Gm16052_j3   | mmu-miR-299-3p  | -0.054 |
| TCONS_00058442 | Gm16052_j3   | mmu-miR-19b-3p  | -0.005 |
| TCONS_00058495 | Bak1_j4      | mmu-miR-29b-3p  | -0.382 |
| TCONS_00058527 | Notch3_j7    | mmu-let-7a-1-3p | -0.081 |
| TCONS_00058527 | Notch3_j7    | rno-let-7f-1*   | -0.062 |
| TCONS_00058649 | Slc5a7       | mmu-miR-9-3p    | -0.104 |
| TCONS_00058649 | Slc5a7       | mmu-miR-544-3p  | -0.402 |
| TCONS_00058649 | Slc5a7       | mmu-miR-19b-3p  | -0.172 |
| TCONS_00058649 | Slc5a7       | mmu-miR-299-3p  | -0.101 |
| TCONS_00058970 | XLOC_013763  | mmu-miR-466d-5p | -0.085 |
| TCONS_00058970 | XLOC_013763  | mmu-miR-544-3p  | -0.244 |
| TCONS_00058970 | XLOC_013763  | mmu-miR-299-3p  | -0.231 |
| TCONS_00059070 | Fance_j7     | mmu-miR-298-5p  | -0.185 |
| TCONS_00059091 | Rrp1b_j6     | mmu-miR-299-3p  | -0.066 |
| TCONS_00059091 | Rrp1b_j6     | mmu-miR-298-5p  | -0.183 |
| TCONS_00059291 | Pisd-ps2_j5  | mmu-miR-544-3p  | -0.083 |
| TCONS_00059291 | Pisd-ps2_j5  | mmu-miR-19b-3p  | -0.158 |
| TCONS_00059325 | Dact2_j2     | mmu-miR-298-5p  | -0.221 |
| TCONS_00059350 | Tbc1d24_j14  | mmu-miR-298-5p  | -0.078 |
| TCONS_00059459 | Cfb_j2       | mmu-miR-29b-3p  | -0.351 |
| TCONS_00059551 | Fbxl17_j2    | mmu-miR-466d-5p | -0.1   |
| TCONS_00059578 | Eif2ak2_j2   | mmu-miR-298-5p  | -0.544 |
| TCONS_00059578 | Eif2ak2_j2   | mmu-miR-466d-5p | -0.034 |
| TCONS_00059578 | Eif2ak2_j2   | mmu-miR-544-3p  | -0.204 |
| TCONS_00059600 | Kcnk12_j2    | mmu-miR-466d-5p | -0.047 |
| TCONS_00059600 | Kcnk12_j2    | mmu-miR-298-5p  | -0.099 |
| TCONS_00059600 | Kcnk12_j2    | mmu-miR-299-3p  | -0.008 |
| TCONS_00059600 | Kcnk12_j2    | mmu-miR-544-3p  | -0.046 |
| TCONS_00059850 | Svil_j7      | mmu-miR-29b-3p  | -0.162 |
| TCONS_00059850 | Svil_j7      | mmu-let-7a-1-3p | -0.026 |
| TCONS_00059850 | Svil_j7      | mmu-miR-9-3p    | -0.19  |
| TCONS_00059850 | Svil_j7      | rno-let-7f-1*   | -0.029 |
| TCONS_00059868 | Greb1l_j3    | mmu-miR-29b-3p  | -0.126 |
| TCONS_00059868 | Greb1l_j3    | mmu-miR-19b-3p  | -0.056 |
| TCONS_00059868 | Greb1l_j3    | mmu-miR-299-3p  | -0.053 |
| TCONS_00059868 | Greb1l_j3    | mmu-miR-298-5p  | -0.038 |
| TCONS_00059868 | Greb1l_j3    | mmu-miR-154-3p  | -0.012 |
| TCONS_00059871 | Mib1         | mmu-miR-544-3p  | -0.033 |
| TCONS_00059871 | Mib1         | mmu-miR-467b-5p | -0.029 |
| TCONS_00059871 | Mib1         | mmu-miR-19b-3p  | -0.154 |
| TCONS_00059871 | Mib1         | mmu-miR-466d-5p | -0.056 |
| TCONS_00059871 | Mib1         | mmu-miR-299-3p  | -0.076 |



|                |                  |                 |        |
|----------------|------------------|-----------------|--------|
| TCONS_00059917 | Rnf138           | mmu-miR-29b-3p  | -0.163 |
| TCONS_00060081 | XLOC_015716      | mmu-miR-466d-5p | -0.097 |
| TCONS_00060081 | XLOC_015716      | mmu-miR-544-3p  | -0.104 |
| TCONS_00060081 | XLOC_015716      | mmu-miR-29b-3p  | -0.266 |
| TCONS_00060081 | XLOC_015716      | mmu-miR-154-3p  | -0.029 |
| TCONS_00060081 | XLOC_015716      | mmu-miR-298-5p  | -0.158 |
| TCONS_00060208 | Wdr7             | mmu-miR-467b-5p | -0.032 |
| TCONS_00060237 | Slmo1_j1         | mmu-miR-298-5p  | -0.272 |
| TCONS_00060237 | Slmo1_j1         | mmu-miR-466d-5p | -0.926 |
| TCONS_00060262 | Mex3c_j1         | rno-let-7f-1*   | -0.018 |
| TCONS_00060262 | Mex3c_j1         | mmu-miR-154-3p  | -0.092 |
| TCONS_00060262 | Mex3c_j1         | mmu-miR-19b-3p  | -0.097 |
| TCONS_00060262 | Mex3c_j1         | mmu-let-7a-1-3p | -0.046 |
| TCONS_00060290 | Smad2_j2         | mmu-miR-298-5p  | -0.311 |
| TCONS_00060334 | Rttm_j1          | mmu-miR-298-5p  | -0.269 |
| TCONS_00060575 | Dtwd2_j1         | mmu-let-7a-1-3p | -0.113 |
| TCONS_00060575 | Dtwd2_j1         | rno-let-7f-1*   | -0.113 |
| TCONS_00060575 | Dtwd2_j1         | mmu-miR-29b-3p  | -0.354 |
| TCONS_00060575 | Dtwd2_j1         | mmu-miR-466d-5p | -0.312 |
| TCONS_00060586 | Zfp608_j3        | rno-let-7f-1*   | -0.068 |
| TCONS_00060586 | Zfp608_j3        | mmu-let-7a-1-3p | -0.068 |
| TCONS_00060586 | Zfp608_j3        | mmu-miR-466d-5p | -0.177 |
| TCONS_00060592 | C330018D20Rik    | mmu-miR-9-3p    | -0.083 |
| TCONS_00060592 | C330018D20Rik    | mmu-miR-298-5p  | -0.213 |
| TCONS_00060592 | C330018D20Rik    | mmu-miR-29b-3p  | -0.1   |
| TCONS_00060609 | Slc6a7           | mmu-miR-544-3p  | -0.143 |
| TCONS_00060687 | RP24-263P17.1_j4 | mmu-miR-298-5p  | -0.825 |
| TCONS_00060755 | Socs6            | rno-let-7f-1*   | -0.271 |
| TCONS_00060755 | Socs6            | mmu-let-7a-1-3p | -0.25  |
| TCONS_00060756 | Socs6            | rno-let-7f-1*   | -0.271 |
| TCONS_00060756 | Socs6            | mmu-let-7a-1-3p | -0.25  |
| TCONS_00061120 | AW554918_j1      | mmu-miR-544-3p  | -0.049 |
| TCONS_00061120 | AW554918_j1      | rno-let-7f-1*   | -0.011 |
| TCONS_00061120 | AW554918_j1      | mmu-miR-298-5p  | -0.169 |
| TCONS_00061120 | AW554918_j1      | mmu-let-7a-1-3p | -0.014 |
| TCONS_00061120 | AW554918_j1      | mmu-miR-466d-5p | -0.113 |
| TCONS_00061321 | Seh1_j3          | mmu-miR-466d-5p | -0.073 |
| TCONS_00061321 | Seh1_j3          | mmu-miR-154-3p  | -0.034 |
| TCONS_00061321 | Seh1_j3          | mmu-miR-19b-3p  | -0.144 |
| TCONS_00061354 | St8sia5          | mmu-miR-466d-5p | -0.234 |
| TCONS_00061354 | St8sia5          | mmu-miR-544-3p  | -0.069 |
| TCONS_00061354 | St8sia5          | mmu-miR-19b-3p  | -0.119 |
| TCONS_00061529 | Arhgef37_j2      | mmu-miR-544-3p  | -0.01  |
| TCONS_00061841 | Zfp35_j3         | mmu-miR-299-3p  | -0.071 |
| TCONS_00061841 | Zfp35_j3         | mmu-miR-19b-3p  | -0.1   |
| TCONS_00061847 | Fhod3            | mmu-miR-19b-3p  | -0.07  |
| TCONS_00061847 | Fhod3            | mmu-miR-29b-3p  | -0.282 |

|                |             |                 |        |
|----------------|-------------|-----------------|--------|
| TCONS_00061847 | Fhod3       | mmu-miR-466d-5p | -0.074 |
| TCONS_00061847 | Fhod3       | mmu-miR-299-3p  | -0.124 |
| TCONS_00061847 | Fhod3       | mmu-miR-544-3p  | -0.168 |
| TCONS_00061927 | Eif1a_j1    | mmu-miR-299-3p  | -0.055 |
| TCONS_00061927 | Eif1a_j1    | mmu-miR-466d-5p | -0.02  |
| TCONS_00061927 | Eif1a_j1    | mmu-miR-544-3p  | -0.276 |
| TCONS_00061981 | St8sia3_j2  | mmu-miR-466d-5p | -3.54  |
| TCONS_00061981 | St8sia3_j2  | mmu-miR-299-3p  | -0.001 |
| TCONS_00061981 | St8sia3_j2  | mmu-miR-298-5p  | -0.087 |
| TCONS_00061981 | St8sia3_j2  | mmu-miR-544-3p  | -0.085 |
| TCONS_00061981 | St8sia3_j2  | mmu-miR-19b-3p  | -0.22  |
| TCONS_00062008 | Myo5b_j1    | mmu-miR-298-5p  | -0.098 |
| TCONS_00062008 | Myo5b_j1    | mmu-let-7a-1-3p | -0.079 |
| TCONS_00062008 | Myo5b_j1    | rno-let-7f-1*   | -0.097 |
| TCONS_00062021 | XLOC_015852 | mmu-miR-9-3p    | -0.02  |
| TCONS_00062021 | XLOC_015852 | mmu-miR-154-3p  | -0.046 |
| TCONS_00062021 | XLOC_015852 | mmu-miR-19b-3p  | -0.153 |
| TCONS_00062097 | XLOC_015973 | mmu-miR-544-3p  | -0.035 |
| TCONS_00062097 | XLOC_015973 | mmu-miR-299-3p  | -0.161 |
| TCONS_00062102 | Pcdh1_j1    | mmu-miR-9-3p    | -0.072 |
| TCONS_00062145 | Tcof1_j4    | mmu-miR-466d-5p | -0.106 |
| TCONS_00062570 | St8sia3_j1  | mmu-miR-299-3p  | -0.001 |
| TCONS_00062570 | St8sia3_j1  | mmu-miR-298-5p  | -0.087 |
| TCONS_00062570 | St8sia3_j1  | mmu-miR-466d-5p | -3.54  |
| TCONS_00062570 | St8sia3_j1  | mmu-miR-544-3p  | -0.082 |
| TCONS_00062570 | St8sia3_j1  | mmu-miR-19b-3p  | -0.217 |
| TCONS_00062641 | Mpp7_j1     | mmu-miR-544-3p  | -0.152 |
| TCONS_00062641 | Mpp7_j1     | mmu-miR-466d-5p | -0.011 |
| TCONS_00062641 | Mpp7_j1     | mmu-miR-299-3p  | -0.326 |
| TCONS_00062656 | Cdh2_j5     | mmu-miR-544-3p  | -0.196 |
| TCONS_00062687 | Tmem173_j1  | mmu-miR-19b-3p  | -0.09  |
| TCONS_00062687 | Tmem173_j1  | mmu-miR-299-3p  | -0.179 |
| TCONS_00062696 | XLOC_015975 | mmu-miR-298-5p  | -0.331 |
| TCONS_00062696 | XLOC_015975 | mmu-miR-466d-5p | -0.135 |
| TCONS_00062696 | XLOC_015975 | mmu-miR-544-3p  | -0.163 |
| TCONS_00062696 | XLOC_015975 | mmu-miR-29b-3p  | -0.102 |
| TCONS_00062709 | XLOC_015994 | mmu-miR-544-3p  | -0.103 |
| TCONS_00062932 | Greb1l_j4   | mmu-miR-466d-5p | -0.191 |
| TCONS_00062932 | Greb1l_j4   | mmu-miR-9-3p    | -0.053 |
| TCONS_00062964 | Wdr33_j6    | mmu-miR-29b-3p  | -0.089 |
| TCONS_00062964 | Wdr33_j6    | mmu-miR-2137    | -0.232 |
| TCONS_00063067 | Malt1_j9    | rno-let-7f-1*   | -0.074 |
| TCONS_00063067 | Malt1_j9    | mmu-let-7a-1-3p | -0.084 |
| TCONS_00063067 | Malt1_j9    | mmu-miR-466d-5p | -0.321 |
| TCONS_00063067 | Malt1_j9    | mmu-miR-298-5p  | -0.273 |
| TCONS_00063072 | XLOC_015807 | mmu-miR-466d-5p | -0.093 |
| TCONS_00063124 | Rttm_j10    | mmu-let-7a-1-3p | -0.013 |

|                |            |                 |        |
|----------------|------------|-----------------|--------|
| TCONS_00063124 | Rttm_j10   | mmu-miR-298-5p  | -0.268 |
| TCONS_00063133 | Zfp438_j2  | mmu-miR-154-3p  | -0.109 |
| TCONS_00063156 | Cdh2_j4    | mmu-miR-544-3p  | -0.196 |
| TCONS_00063208 | Pcdh12_j1  | mmu-miR-9-3p    | -0.006 |
| TCONS_00063208 | Pcdh12_j1  | mmu-miR-466d-5p | -0.017 |
| TCONS_00063236 | Slc6a7_j2  | mmu-miR-544-3p  | -0.097 |
| TCONS_00063447 | Lama3_j12  | mmu-miR-466d-5p | -0.117 |
| TCONS_00063466 | Wdr33_j1   | mmu-miR-9-3p    | -0.009 |
| TCONS_00063466 | Wdr33_j1   | mmu-miR-299-3p  | -0.055 |
| TCONS_00063466 | Wdr33_j1   | mmu-miR-544-3p  | -0.089 |
| TCONS_00063466 | Wdr33_j1   | mmu-miR-2137    | -0.465 |
| TCONS_00063466 | Wdr33_j1   | mmu-miR-29b-3p  | -0.089 |
| TCONS_00063609 | Pias2      | rno-let-7f-1*   | -0.006 |
| TCONS_00063623 | Gm10125_j3 | mmu-miR-466d-5p | -0.057 |
| TCONS_00063669 | Diap1_j8   | mmu-miR-299-3p  | -0.072 |
| TCONS_00063669 | Diap1_j8   | mmu-miR-298-5p  | -0.249 |
| TCONS_00063675 | Pcdh1_j3   | mmu-miR-298-5p  | -0.315 |
| TCONS_00063675 | Pcdh1_j3   | mmu-miR-9-3p    | -0.103 |
| TCONS_00063737 | Cep76_j1   | mmu-miR-544-3p  | -0.148 |
| TCONS_00063737 | Cep76_j1   | mmu-miR-19b-3p  | -0.057 |
| TCONS_00063737 | Cep76_j1   | mmu-miR-466d-5p | -0.119 |
| TCONS_00063737 | Cep76_j1   | rno-let-7f-1*   | -0.192 |
| TCONS_00063737 | Cep76_j1   | mmu-let-7a-1-3p | -0.186 |
| TCONS_00063765 | Galr1_j1   | mmu-miR-544-3p  | -0.006 |
| TCONS_00063765 | Galr1_j1   | mmu-miR-9-3p    | -0.101 |
| TCONS_00063765 | Galr1_j1   | mmu-miR-2137    | -0.155 |
| TCONS_00063765 | Galr1_j1   | mmu-miR-466d-5p | -0.036 |
| TCONS_00063765 | Galr1_j1   | mmu-miR-298-5p  | -0.144 |
| TCONS_00063765 | Galr1_j1   | mmu-let-7a-1-3p | -0.171 |
| TCONS_00063765 | Galr1_j1   | rno-let-7f-1*   | -0.171 |
| TCONS_00063765 | Galr1_j1   | mmu-miR-19b-3p  | -0.082 |
| TCONS_00064126 | Ms4a6c     | mmu-miR-544-3p  | -0.333 |
| TCONS_00064126 | Ms4a6c     | mmu-miR-467b-5p | -0.19  |
| TCONS_00064128 | Ms4a6b     | mmu-miR-544-3p  | -0.363 |
| TCONS_00064128 | Ms4a6b     | rno-let-7f-1*   | -0.054 |
| TCONS_00064128 | Ms4a6b     | mmu-miR-466d-5p | -0.042 |
| TCONS_00064128 | Ms4a6b     | mmu-let-7a-1-3p | -0.063 |
| TCONS_00064134 | Mpeg1_j1   | mmu-miR-154-3p  | -0.059 |
| TCONS_00064134 | Mpeg1_j1   | mmu-miR-466d-5p | -0.005 |
| TCONS_00064134 | Mpeg1_j1   | mmu-miR-467b-5p | -0.063 |
| TCONS_00064134 | Mpeg1_j1   | mmu-miR-9-3p    | -0.18  |
| TCONS_00064134 | Mpeg1_j1   | mmu-miR-544-3p  | -0.353 |
| TCONS_00064134 | Mpeg1_j1   | mmu-miR-19b-3p  | -0.06  |
| TCONS_00064134 | Mpeg1_j1   | mmu-miR-298-5p  | -0.328 |
| TCONS_00064153 | Prune2_j8  | mmu-miR-19b-3p  | -0.059 |
| TCONS_00064227 | Fas_j1     | mmu-let-7a-1-3p | -0.063 |
| TCONS_00064227 | Fas_j1     | rno-let-7f-1*   | -0.059 |

|                |             |                 |        |
|----------------|-------------|-----------------|--------|
| TCONS_00064227 | Fas_j1      | mmu-miR-298-5p  | -0.11  |
| TCONS_00064359 | Gbf1_j2     | mmu-miR-298-5p  | -0.089 |
| TCONS_00064359 | Gbf1_j2     | mmu-miR-466d-5p | -0.071 |
| TCONS_00064419 | Adra2a_j1   | mmu-miR-298-5p  | -0.097 |
| TCONS_00064434 | Nhlrc2_j1   | mmu-miR-154-3p  | -0.05  |
| TCONS_00064434 | Nhlrc2_j1   | mmu-miR-298-5p  | -0.071 |
| TCONS_00064434 | Nhlrc2_j1   | mmu-miR-9-3p    | -0.051 |
| TCONS_00064523 | Tmem151a_j2 | mmu-miR-298-5p  | -0.238 |
| TCONS_00064556 | Frmd8_j1    | mmu-miR-298-5p  | -0.071 |
| TCONS_00064589 | Plcb3_j5    | mmu-miR-298-5p  | -0.101 |
| TCONS_00064590 | Plcb3_j6    | mmu-miR-298-5p  | -0.101 |
| TCONS_00064660 | Ms4a7       | mmu-miR-298-5p  | -0.123 |
| TCONS_00064660 | Ms4a7       | mmu-miR-19b-3p  | -0.127 |
| TCONS_00064662 | Ms4a6d      | mmu-miR-544-3p  | -0.162 |
| TCONS_00064755 | Asah2_j2    | mmu-miR-299-3p  | -0.263 |
| TCONS_00064755 | Asah2_j2    | mmu-miR-466d-5p | -2.43  |
| TCONS_00064755 | Asah2_j2    | mmu-let-7a-1-3p | -0.013 |
| TCONS_00064755 | Asah2_j2    | mmu-miR-154-3p  | -0.179 |
| TCONS_00064755 | Asah2_j2    | rno-let-7f-1*   | -0.016 |
| TCONS_00064756 | Asah2       | mmu-miR-299-3p  | -0.263 |
| TCONS_00064756 | Asah2       | mmu-miR-466d-5p | -1.95  |
| TCONS_00064756 | Asah2       | mmu-miR-154-3p  | -0.179 |
| TCONS_00064780 | Ppp1r3c     | mmu-miR-19b-3p  | -0.081 |
| TCONS_00064855 | Sec31b_j5   | mmu-miR-544-3p  | -0.088 |
| TCONS_00064855 | Sec31b_j5   | mmu-miR-298-5p  | -0.681 |
| TCONS_00064855 | Sec31b_j5   | mmu-miR-29b-3p  | -0.121 |
| TCONS_00065243 | Rin1_j4     | mmu-miR-298-5p  | -0.109 |
| TCONS_00065243 | Rin1_j4     | mmu-miR-466d-5p | -0.298 |
| TCONS_00065257 | Map3k11_j2  | mmu-miR-299-3p  | -0.133 |
| TCONS_00065266 | Atg2a_j4    | mmu-miR-298-5p  | -0.151 |
| TCONS_00065645 | Flrt1_j1    | mmu-miR-544-3p  | -0.234 |
| TCONS_00065645 | Flrt1_j1    | mmu-miR-298-5p  | -0.034 |
| TCONS_00065646 | Cox8a       | mmu-miR-2137    | -0.245 |
| TCONS_00065646 | Cox8a       | mmu-miR-466d-5p | -0.486 |
| TCONS_00065727 | Prkg1_j4    | mmu-miR-466d-5p | -0.101 |
| TCONS_00065856 | Csf2ra_j4   | mmu-miR-466d-5p | -1.19  |
| TCONS_00065856 | Csf2ra_j4   | mmu-miR-19b-3p  | -0.067 |
| TCONS_00065856 | Csf2ra_j4   | mmu-miR-298-5p  | -0.002 |
| TCONS_00066112 | Nrxn2_j8    | mmu-miR-298-5p  | -0.074 |
| TCONS_00066112 | Nrxn2_j8    | mmu-miR-29b-3p  | -0.077 |
| TCONS_00066164 | Prune2_j10  | mmu-miR-9-3p    | -0.134 |
| TCONS_00066164 | Prune2_j10  | mmu-miR-467b-5p | -0.112 |
| TCONS_00066203 | Pten_j9     | mmu-miR-29b-3p  | -0.346 |
| TCONS_00066203 | Pten_j9     | mmu-miR-19b-3p  | -0.03  |
| TCONS_00066230 | Cyp26a1     | mmu-miR-154-3p  | -0.618 |
| TCONS_00066233 | Cep55_j3    | rno-let-7f-1*   | -0.049 |
| TCONS_00066233 | Cep55_j3    | mmu-let-7a-1-3p | -0.059 |

|                |                  |                 |           |
|----------------|------------------|-----------------|-----------|
| TCONS_00066239 | Hells_j3         | rno-let-7f-1*   | -0.038    |
| TCONS_00066239 | Hells_j3         | mmu-miR-466d-5p | -0.368    |
| TCONS_00066239 | Hells_j3         | mmu-miR-467b-5p | -0.038    |
| TCONS_00066280 | Gbf1_j4          | mmu-miR-544-3p  | -0.232    |
| TCONS_00066334 | Aldh3b1_j2       | mmu-miR-298-5p  | -0.109    |
| TCONS_00066380 | Ccdc88b_j1       | mmu-miR-298-5p  | -0.16     |
| TCONS_00066432 | Mamdc2_j1        | rno-let-7f-1*   | -0.147    |
| TCONS_00066432 | Mamdc2_j1        | mmu-let-7a-1-3p | -0.147    |
| TCONS_00066482 | Pyroxd2_j6       | rno-let-7f-1*   | -0.074    |
| TCONS_00066482 | Pyroxd2_j6       | mmu-let-7a-1-3p | -0.074    |
| TCONS_00066482 | Pyroxd2_j6       | mmu-miR-298-5p  | -0.291    |
| TCONS_00066732 | Unc93b1_j2       | mmu-miR-19b-3p  | -0.241    |
| TCONS_00066732 | Unc93b1_j2       | mmu-miR-298-5p  | -0.379    |
| TCONS_00066818 | Prune2_j9        | mmu-miR-19b-3p  | -0.063    |
| TCONS_00066842 | Pten_j5          | mmu-let-7a-1-3p | -0.104    |
| TCONS_00066842 | Pten_j5          | mmu-miR-19b-3p  | -0.209    |
| TCONS_00066842 | Pten_j5          | rno-let-7f-1*   | -0.123    |
| TCONS_00066842 | Pten_j5          | mmu-miR-29b-3p  | -0.39     |
| TCONS_00066924 | Tcf7l2_j9        | rno-let-7f-1*   | -6.94E-18 |
| TCONS_00066924 | Tcf7l2_j9        | mmu-miR-544-3p  | -0.178    |
| TCONS_00066924 | Tcf7l2_j9        | mmu-miR-298-5p  | -0.127    |
| TCONS_00066924 | Tcf7l2_j9        | mmu-miR-9-3p    | -0.005    |
| TCONS_00066935 | 1700011F14Rik_j4 | mmu-let-7a-1-3p | -0.029    |
| TCONS_00066935 | 1700011F14Rik_j4 | mmu-miR-19b-3p  | -0.131    |
| TCONS_00066935 | 1700011F14Rik_j4 | rno-let-7f-1*   | -0.029    |
| TCONS_00066935 | 1700011F14Rik_j4 | mmu-miR-154-3p  | -0.047    |
| TCONS_00066935 | 1700011F14Rik_j4 | mmu-miR-29b-3p  | -0.075    |
| TCONS_00066935 | 1700011F14Rik_j4 | mmu-miR-298-5p  | -0.068    |
| TCONS_00067018 | Glis3_j4         | mmu-miR-466d-5p | -1.44     |
| TCONS_00067018 | Glis3_j4         | mmu-let-7a-1-3p | -0.051    |
| TCONS_00067018 | Glis3_j4         | mmu-miR-298-5p  | -0.176    |
| TCONS_00067018 | Glis3_j4         | rno-let-7f-1*   | -0.051    |
| TCONS_00067018 | Glis3_j4         | mmu-miR-19b-3p  | -0.185    |
| TCONS_00067018 | Glis3_j4         | mmu-miR-29b-3p  | -0.161    |
| TCONS_00067018 | Glis3_j4         | mmu-miR-9-3p    | -0.149    |
| TCONS_00067018 | Glis3_j4         | mmu-miR-154-3p  | 6.94E-18  |
| TCONS_00067019 | Glis3_j6         | mmu-let-7a-1-3p | -0.051    |
| TCONS_00067019 | Glis3_j6         | mmu-miR-19b-3p  | -0.026    |
| TCONS_00067019 | Glis3_j6         | rno-let-7f-1*   | -0.051    |
| TCONS_00067019 | Glis3_j6         | mmu-miR-299-3p  | -0.049    |
| TCONS_00067019 | Glis3_j6         | mmu-miR-29b-3p  | -0.161    |
| TCONS_00067019 | Glis3_j6         | mmu-miR-298-5p  | -0.044    |
| TCONS_00067019 | Glis3_j6         | mmu-miR-9-3p    | -0.149    |
| TCONS_00067036 | Ankrd1           | mmu-let-7a-1-3p | -0.064    |
| TCONS_00067036 | Ankrd1           | rno-let-7f-1*   | -0.064    |
| TCONS_00067062 | Hps1_j10         | mmu-miR-544-3p  | -0.027    |
| TCONS_00067062 | Hps1_j10         | mmu-miR-29b-3p  | -0.11     |

|                |                  |                 |        |
|----------------|------------------|-----------------|--------|
| TCONS_00067063 | Hps1_j11         | mmu-miR-466d-5p | -2.48  |
| TCONS_00067063 | Hps1_j11         | mmu-miR-29b-3p  | -0.09  |
| TCONS_00067276 | Clcf1_j5         | mmu-miR-544-3p  | -0.081 |
| TCONS_00067464 | Kcnk18_j1        | mmu-miR-29b-3p  | -0.077 |
| TCONS_00067464 | Kcnk18_j1        | mmu-miR-544-3p  | -0.057 |
| TCONS_00067464 | Kcnk18_j1        | mmu-miR-298-5p  | -0.04  |
| TCONS_00067492 | Pacs1_j3         | mmu-miR-544-3p  | -0.022 |
| TCONS_00067492 | Pacs1_j3         | mmu-miR-298-5p  | -0.171 |
| TCONS_00067492 | Pacs1_j3         | mmu-miR-299-3p  | -0.068 |
| TCONS_00067504 | Dpf2_j3          | mmu-miR-298-5p  | -0.432 |
| TCONS_00068006 | 1700011F14Rik_j1 | mmu-miR-19b-3p  | -0.127 |
| TCONS_00068006 | 1700011F14Rik_j1 | mmu-miR-299-3p  | -0.078 |
| TCONS_00068006 | 1700011F14Rik_j1 | mmu-miR-298-5p  | -0.184 |
| TCONS_00068125 | Slc16a12         | mmu-miR-298-5p  | -0.19  |
| TCONS_00068125 | Slc16a12         | mmu-miR-544-3p  | -0.135 |
| TCONS_00068153 | Hps1_j7          | mmu-miR-29b-3p  | -0.116 |
| TCONS_00068155 | Dnmbp_j6         | mmu-miR-2137    | -0.438 |
| TCONS_00068155 | Dnmbp_j6         | mmu-miR-29b-3p  | -0.201 |
| TCONS_00068179 | Pcgf6_j2         | mmu-miR-467b-5p | -0.061 |
| TCONS_00068180 | Pcgf6            | mmu-miR-467b-5p | -0.061 |
| TCONS_00068372 | Ccdc3            | mmu-miR-298-5p  | -0.04  |
| TCONS_00068372 | Ccdc3            | mmu-miR-544-3p  | -0.069 |
| TCONS_00068372 | Ccdc3            | mmu-miR-467b-5p | -0.242 |
| TCONS_00068372 | Ccdc3            | mmu-miR-19b-3p  | -0.027 |
| TCONS_00068372 | Ccdc3            | mmu-miR-466d-5p | -1.9   |
| TCONS_00068389 | Il15ra           | rno-let-7f-1*   | -0.127 |
| TCONS_00068389 | Il15ra           | mmu-let-7a-1-3p | -0.137 |
| TCONS_00068389 | Il15ra           | mmu-miR-154-3p  | -0.123 |
| TCONS_00068389 | Il15ra           | mmu-miR-19b-3p  | -0.078 |
| TCONS_00068405 | Mrc1             | mmu-miR-299-3p  | -0.101 |
| TCONS_00068449 | Thns1_j2         | rno-let-7f-1*   | -0.082 |
| TCONS_00068449 | Thns1_j2         | mmu-miR-298-5p  | -0.209 |
| TCONS_00068449 | Thns1_j2         | mmu-miR-467b-5p | -0.095 |
| TCONS_00068449 | Thns1_j2         | mmu-let-7a-1-3p | -0.073 |
| TCONS_00068486 | Abca2            | mmu-miR-19b-3p  | -0.082 |
| TCONS_00068486 | Abca2            | mmu-let-7a-1-3p | -0.036 |
| TCONS_00068486 | Abca2            | mmu-miR-298-5p  | -0.057 |
| TCONS_00068486 | Abca2            | mmu-miR-299-3p  | -0.092 |
| TCONS_00068486 | Abca2            | rno-let-7f-1*   | -0.036 |
| TCONS_00068486 | Abca2            | mmu-miR-9-3p    | -0.032 |
| TCONS_00068487 | Abca2_j9         | mmu-miR-9-3p    | -0.005 |
| TCONS_00068487 | Abca2_j9         | mmu-let-7a-1-3p | -0.036 |
| TCONS_00068487 | Abca2_j9         | mmu-miR-19b-3p  | -0.044 |
| TCONS_00068487 | Abca2_j9         | mmu-miR-298-5p  | -0.019 |
| TCONS_00068487 | Abca2_j9         | rno-let-7f-1*   | -0.036 |
| TCONS_00068487 | Abca2_j9         | mmu-miR-299-3p  | -0.092 |
| TCONS_00068491 | Fbxw5_j1         | mmu-miR-19b-3p  | -0.077 |

|                |                  |                 |        |
|----------------|------------------|-----------------|--------|
| TCONS_00068491 | Fbxw5_j1         | mmu-miR-299-3p  | -0.077 |
| TCONS_00068599 | Lamc3_j2         | mmu-miR-298-5p  | -0.297 |
| TCONS_00068599 | Lamc3_j2         | mmu-miR-466d-5p | -0.066 |
| TCONS_00068697 | Rif1_j4          | mmu-let-7a-1-3p | -0.087 |
| TCONS_00068697 | Rif1_j4          | rno-let-7f-1*   | -0.097 |
| TCONS_00068697 | Rif1_j4          | mmu-miR-9-3p    | -0.087 |
| TCONS_00068697 | Rif1_j4          | mmu-miR-298-5p  | -0.304 |
| TCONS_00068697 | Rif1_j4          | mmu-miR-19b-3p  | -0.099 |
| TCONS_00068919 | Sfpi1            | rno-let-7f-1*   | -0.136 |
| TCONS_00068919 | Sfpi1            | mmu-miR-2137    | -0.337 |
| TCONS_00068919 | Sfpi1            | mmu-let-7a-1-3p | -0.108 |
| TCONS_00069224 | Mavs             | mmu-miR-154-3p  | -0.145 |
| TCONS_00069224 | Mavs             | mmu-miR-544-3p  | -0.067 |
| TCONS_00069328 | Nsfl1c_j3        | mmu-miR-298-5p  | -0.213 |
| TCONS_00069328 | Nsfl1c_j3        | mmu-miR-544-3p  | -0.098 |
| TCONS_00069340 | Scrt2_j2         | mmu-miR-298-5p  | -0.432 |
| TCONS_00069340 | Scrt2_j2         | mmu-miR-466d-5p | -0.127 |
| TCONS_00069478 | Ppp1r16b         | mmu-let-7a-1-3p | -0.002 |
| TCONS_00069478 | Ppp1r16b         | mmu-miR-467b-5p | -0.089 |
| TCONS_00069478 | Ppp1r16b         | mmu-miR-298-5p  | -0.145 |
| TCONS_00069478 | Ppp1r16b         | rno-let-7f-1*   | -0.012 |
| TCONS_00069478 | Ppp1r16b         | mmu-miR-466d-5p | -6.14  |
| TCONS_00069496 | 9430021M05Rik_j7 | mmu-miR-299-3p  | -0.126 |
| TCONS_00069496 | 9430021M05Rik_j7 | mmu-miR-29b-3p  | -0.352 |
| TCONS_00069808 | Hnmt             | mmu-miR-467b-5p | -0.097 |
| TCONS_00069881 | Fam163b_j1       | mmu-miR-298-5p  | -0.196 |
| TCONS_00069910 | Ccbl1            | mmu-miR-298-5p  | -0.12  |
| TCONS_00069929 | Fibcd1_j2        | mmu-miR-298-5p  | -0.011 |
| TCONS_00069929 | Fibcd1_j2        | mmu-miR-299-3p  | -0.027 |
| TCONS_00069944 | Fpgs_j1          | mmu-miR-466d-5p | -0.092 |
| TCONS_00070124 | Slc38a11_j3      | mmu-miR-544-3p  | -0.238 |
| TCONS_00070124 | Slc38a11_j3      | mmu-miR-9-3p    | -0.036 |
| TCONS_00070124 | Slc38a11_j3      | mmu-miR-29b-3p  | -0.045 |
| TCONS_00070333 | D430041D05Rik_j3 | mmu-miR-154-3p  | -0.008 |
| TCONS_00070333 | D430041D05Rik_j3 | mmu-miR-298-5p  | -0.611 |
| TCONS_00070333 | D430041D05Rik_j3 | mmu-miR-29b-3p  | -0.176 |
| TCONS_00070333 | D430041D05Rik_j3 | mmu-miR-9-3p    | -0.05  |
| TCONS_00070375 | Gjd2             | mmu-miR-544-3p  | -0.181 |
| TCONS_00070375 | Gjd2             | mmu-miR-466d-5p | -0.414 |
| TCONS_00070375 | Gjd2             | mmu-miR-29b-3p  | -0.153 |
| TCONS_00070455 | Spg11_j6         | mmu-miR-9-3p    | -0.036 |
| TCONS_00070456 | Patl2_j2         | mmu-miR-154-3p  | -0.19  |
| TCONS_00070524 | Gm14025_j1       | mmu-miR-544-3p  | -0.163 |
| TCONS_00070524 | Gm14025_j1       | mmu-miR-299-3p  | -0.171 |
| TCONS_00070524 | Gm14025_j1       | mmu-miR-467b-5p | -0.1   |
| TCONS_00070524 | Gm14025_j1       | mmu-miR-29b-3p  | -0.398 |
| TCONS_00070587 | Hao1_j1          | mmu-miR-19b-3p  | -0.091 |

|                |             |                 |        |
|----------------|-------------|-----------------|--------|
| TCONS_00070603 | Flrt3       | mmu-miR-466d-5p | -0.056 |
| TCONS_00070603 | Flrt3       | mmu-miR-9-3p    | -0.017 |
| TCONS_00070787 | Wfdc3       | mmu-miR-29b-3p  | -0.093 |
| TCONS_00070806 | Zfp663_j2   | mmu-miR-466d-5p | -4.05  |
| TCONS_00070806 | Zfp663_j2   | mmu-miR-544-3p  | -0.139 |
| TCONS_00070913 | Lama5_j3    | mmu-miR-466d-5p | -0.061 |
| TCONS_00070931 | Ythdf1_j1   | mmu-miR-29b-3p  | -0.361 |
| TCONS_00070931 | Ythdf1_j1   | mmu-miR-9-3p    | -0.186 |
| TCONS_00070931 | Ythdf1_j1   | mmu-miR-544-3p  | -0.143 |
| TCONS_00070948 | Zbtb46_j2   | mmu-miR-19b-3p  | -0.24  |
| TCONS_00070948 | Zbtb46_j2   | mmu-miR-29b-3p  | -0.224 |
| TCONS_00071638 | Gm347_j4    | mmu-miR-466d-5p | -0.019 |
| TCONS_00071638 | Gm347_j4    | rno-let-7f-1*   | -0.062 |
| TCONS_00071638 | Gm347_j4    | mmu-miR-299-3p  | -0.216 |
| TCONS_00071638 | Gm347_j4    | mmu-let-7a-1-3p | -0.053 |
| TCONS_00071638 | Gm347_j4    | mmu-miR-29b-3p  | -0.058 |
| TCONS_00071756 | Lypd6b_j2   | mmu-miR-467b-5p | -0.263 |
| TCONS_00071825 | Dcaf17_j3   | mmu-let-7a-1-3p | -0.009 |
| TCONS_00071825 | Dcaf17_j3   | rno-let-7f-1*   | -0.002 |
| TCONS_00071825 | Dcaf17_j3   | mmu-miR-544-3p  | -0.038 |
| TCONS_00071825 | Dcaf17_j3   | mmu-miR-29b-3p  | -0.199 |
| TCONS_00071825 | Dcaf17_j3   | mmu-miR-299-3p  | -0.14  |
| TCONS_00071827 | Dcaf17_j5   | rno-let-7f-1*   | -0.002 |
| TCONS_00071827 | Dcaf17_j5   | mmu-miR-544-3p  | -0.042 |
| TCONS_00071827 | Dcaf17_j5   | mmu-let-7a-1-3p | -0.009 |
| TCONS_00071827 | Dcaf17_j5   | mmu-miR-299-3p  | -0.144 |
| TCONS_00071827 | Dcaf17_j5   | mmu-miR-29b-3p  | -0.203 |
| TCONS_00071891 | BC027685_j1 | mmu-miR-9-3p    | -0.136 |
| TCONS_00071891 | BC027685_j1 | mmu-miR-19b-3p  | -0.073 |
| TCONS_00072006 | Mapkbp1_j9  | mmu-miR-298-5p  | -0.263 |
| TCONS_00072006 | Mapkbp1_j9  | mmu-miR-466d-5p | -2.11  |
| TCONS_00072006 | Mapkbp1_j9  | mmu-miR-29b-3p  | -0.097 |
| TCONS_00072006 | Mapkbp1_j9  | mmu-miR-544-3p  | -0.06  |
| TCONS_00072029 | Serf2_j1    | mmu-miR-298-5p  | -0.488 |
| TCONS_00072029 | Serf2_j1    | mmu-miR-467b-5p | -0.009 |
| TCONS_00072029 | Serf2_j1    | mmu-miR-9-3p    | -0.046 |
| TCONS_00072029 | Serf2_j1    | mmu-miR-29b-3p  | -0.049 |
| TCONS_00072177 | Srxn1_j1    | mmu-miR-29b-3p  | -0.19  |
| TCONS_00072208 | U46068_j1   | mmu-miR-298-5p  | -0.201 |
| TCONS_00072208 | U46068_j1   | mmu-miR-299-3p  | -0.079 |
| TCONS_00072262 | Fam83d_j2   | mmu-miR-19b-3p  | -0.378 |
| TCONS_00072465 | Taf3_j1     | mmu-miR-544-3p  | -0.312 |
| TCONS_00072465 | Taf3_j1     | mmu-miR-9-3p    | -0.006 |
| TCONS_00072605 | Stxbp1_j1   | mmu-miR-19b-3p  | -0.008 |
| TCONS_00072605 | Stxbp1_j1   | rno-let-7f-1*   | -0.004 |
| TCONS_00072605 | Stxbp1_j1   | mmu-miR-298-5p  | -0.1   |
| TCONS_00072605 | Stxbp1_j1   | mmu-let-7a-1-3p | -0.007 |



|                |            |                 |          |
|----------------|------------|-----------------|----------|
| TCONS_00072605 | Stxbp1_j1  | mmu-miR-544-3p  | -0.154   |
| TCONS_00072644 | Psmb7      | mmu-miR-29b-3p  | -0.233   |
| TCONS_00072859 | Exd1       | mmu-miR-9-3p    | -0.022   |
| TCONS_00072859 | Exd1       | mmu-miR-29b-3p  | -0.135   |
| TCONS_00072859 | Exd1       | mmu-miR-467b-5p | -0.021   |
| TCONS_00072859 | Exd1       | mmu-miR-544-3p  | -0.113   |
| TCONS_00072859 | Exd1       | mmu-miR-298-5p  | -0.024   |
| TCONS_00073124 | Prex1_j6   | mmu-miR-9-3p    | -0.027   |
| TCONS_00073124 | Prex1_j6   | mmu-miR-298-5p  | -0.244   |
| TCONS_00073750 | Mrc1_j2    | mmu-miR-299-3p  | -0.102   |
| TCONS_00073784 | Psd4       | mmu-miR-298-5p  | -0.003   |
| TCONS_00073784 | Psd4       | mmu-miR-544-3p  | -0.358   |
| TCONS_00073905 | Lypd6b_j3  | mmu-miR-467b-5p | -0.263   |
| TCONS_00073931 | Upp2_j9    | mmu-miR-299-3p  | -0.008   |
| TCONS_00073931 | Upp2_j9    | mmu-miR-467b-5p | -0.025   |
| TCONS_00073931 | Upp2_j9    | mmu-miR-29b-3p  | -0.014   |
| TCONS_00073931 | Upp2_j9    | mmu-miR-466d-5p | -0.492   |
| TCONS_00073931 | Upp2_j9    | mmu-miR-9-3p    | -0.062   |
| TCONS_00073966 | Klhl23_j3  | mmu-miR-298-5p  | -0.08    |
| TCONS_00073966 | Klhl23_j3  | rno-let-7f-1*   | 6.94E-18 |
| TCONS_00073966 | Klhl23_j3  | mmu-miR-466d-5p | -2.16    |
| TCONS_00074007 | Ypel4_j3   | mmu-miR-154-3p  | -0.267   |
| TCONS_00074007 | Ypel4_j3   | mmu-miR-467b-5p | -0.069   |
| TCONS_00074078 | Spred1_j1  | rno-let-7f-1*   | -0.046   |
| TCONS_00074078 | Spred1_j1  | mmu-let-7a-1-3p | -0.049   |
| TCONS_00074078 | Spred1_j1  | mmu-miR-544-3p  | -0.056   |
| TCONS_00074080 | Thbs1_j1   | mmu-miR-9-3p    | 2.08E-17 |
| TCONS_00074080 | Thbs1_j1   | mmu-miR-19b-3p  | -0.144   |
| TCONS_00074080 | Thbs1_j1   | mmu-let-7a-1-3p | -0.133   |
| TCONS_00074080 | Thbs1_j1   | rno-let-7f-1*   | -0.124   |
| TCONS_00074127 | Eif3j_j3   | mmu-miR-298-5p  | -0.021   |
| TCONS_00074127 | Eif3j_j3   | mmu-miR-29b-3p  | -0.018   |
| TCONS_00074127 | Eif3j_j3   | mmu-let-7a-1-3p | -0.268   |
| TCONS_00074127 | Eif3j_j3   | mmu-miR-299-3p  | -0.119   |
| TCONS_00074127 | Eif3j_j3   | rno-let-7f-1*   | -0.247   |
| TCONS_00074127 | Eif3j_j3   | mmu-miR-154-3p  | -0.03    |
| TCONS_00074127 | Eif3j_j3   | mmu-miR-9-3p    | -0.232   |
| TCONS_00074127 | Eif3j_j3   | mmu-miR-467b-5p | -0.101   |
| TCONS_00074205 | Tmem90b_j2 | mmu-miR-544-3p  | -0.145   |
| TCONS_00074205 | Tmem90b_j2 | mmu-miR-298-5p  | -0.078   |
| TCONS_00074212 | Nsfl1c_j1  | mmu-miR-544-3p  | -0.098   |
| TCONS_00074212 | Nsfl1c_j1  | mmu-miR-298-5p  | -0.213   |
| TCONS_00074282 | Gm14246_j1 | mmu-miR-298-5p  | -0.254   |
| TCONS_00074401 | Myt1_j12   | mmu-miR-299-3p  | -0.421   |
| TCONS_00074401 | Myt1_j12   | rno-let-7f-1*   | -0.042   |
| TCONS_00074401 | Myt1_j12   | mmu-miR-29b-3p  | -0.018   |
| TCONS_00074401 | Myt1_j12   | mmu-let-7a-1-3p | -0.042   |

|                |               |                 |        |
|----------------|---------------|-----------------|--------|
| TCONS_00074488 | Sardh_j3      | mmu-miR-29b-3p  | -0.125 |
| TCONS_00074488 | Sardh_j3      | mmu-miR-298-5p  | -0.167 |
| TCONS_00074488 | Sardh_j3      | mmu-miR-466d-5p | -0.392 |
| TCONS_00074558 | Nr6a1_j4      | mmu-miR-298-5p  | -0.193 |
| TCONS_00074558 | Nr6a1_j4      | mmu-miR-544-3p  | -0.02  |
| TCONS_00074560 | Golga1_j2     | mmu-miR-9-3p    | -0.048 |
| TCONS_00074560 | Golga1_j2     | mmu-miR-544-3p  | -0.102 |
| TCONS_00074560 | Golga1_j2     | mmu-miR-2137    | -0.25  |
| TCONS_00074568 | Gtdc1_j1      | mmu-let-7a-1-3p | -0.003 |
| TCONS_00074568 | Gtdc1_j1      | rno-let-7f-1*   | -0.013 |
| TCONS_00074580 | Neb_j11       | rno-let-7f-1*   | -0.013 |
| TCONS_00074580 | Neb_j11       | mmu-let-7a-1-3p | -0.016 |
| TCONS_00074580 | Neb_j11       | mmu-miR-298-5p  | -0.114 |
| TCONS_00074733 | Arhgap11a     | mmu-miR-544-3p  | -0.164 |
| TCONS_00074733 | Arhgap11a     | mmu-miR-466d-5p | -0.195 |
| TCONS_00074733 | Arhgap11a     | mmu-miR-19b-3p  | -0.059 |
| TCONS_00074734 | Zfp770_j1     | mmu-miR-29b-3p  | -0.165 |
| TCONS_00074770 | Mfap1a_j5     | mmu-let-7a-1-3p | -0.057 |
| TCONS_00074770 | Mfap1a_j5     | mmu-miR-299-3p  | -0.214 |
| TCONS_00074770 | Mfap1a_j5     | mmu-miR-466d-5p | -0.329 |
| TCONS_00074770 | Mfap1a_j5     | rno-let-7f-1*   | -0.038 |
| TCONS_00074779 | Fbn1_j2       | mmu-miR-29b-3p  | -0.649 |
| TCONS_00074876 | Eif2s2_j1     | mmu-miR-298-5p  | -0.219 |
| TCONS_00074876 | Eif2s2_j1     | mmu-miR-544-3p  | -0.059 |
| TCONS_00074876 | Eif2s2_j1     | mmu-miR-467b-5p | -0.126 |
| TCONS_00074876 | Eif2s2_j1     | mmu-miR-29b-3p  | -0.088 |
| TCONS_00075484 | Abca2_j3      | mmu-miR-19b-3p  | -0.049 |
| TCONS_00075484 | Abca2_j3      | mmu-miR-466d-5p | -0.018 |
| TCONS_00075484 | Abca2_j3      | mmu-miR-29b-3p  | -0.088 |
| TCONS_00075543 | Lamc3_j4      | mmu-miR-19b-3p  | -0.302 |
| TCONS_00075543 | Lamc3_j4      | mmu-miR-299-3p  | -0.013 |
| TCONS_00075635 | Klhl23_j1     | mmu-miR-298-5p  | -0.078 |
| TCONS_00075635 | Klhl23_j1     | mmu-miR-466d-5p | -2.12  |
| TCONS_00075731 | Ccdc34_j2     | mmu-miR-9-3p    | -0.04  |
| TCONS_00075731 | Ccdc34_j2     | mmu-miR-298-5p  | -0.111 |
| TCONS_00075867 | 2310046K01Rik | mmu-miR-466d-5p | -0.09  |
| TCONS_00075867 | 2310046K01Rik | mmu-miR-298-5p  | -0.118 |
| TCONS_00075927 | L3mbtl_j7     | mmu-miR-2137    | -0.51  |
| TCONS_00076011 | Slco4a1_j6    | mmu-miR-19b-3p  | -0.194 |
| TCONS_00076103 | Traf2_j5      | mmu-miR-466d-5p | -0.036 |
| TCONS_00076103 | Traf2_j5      | mmu-miR-298-5p  | -0.332 |
| TCONS_00076103 | Traf2_j5      | mmu-miR-19b-3p  | -0.104 |
| TCONS_00076312 | Ldlrad3_j1    | mmu-miR-29b-3p  | -0.184 |
| TCONS_00076312 | Ldlrad3_j1    | mmu-miR-466d-5p | -0.093 |
| TCONS_00076312 | Ldlrad3_j1    | mmu-miR-298-5p  | -0.101 |
| TCONS_00076363 | Tgm5          | mmu-miR-544-3p  | -0.383 |
| TCONS_00076535 | Kcng1_j2      | mmu-miR-466d-5p | -0.403 |

|                |                  |                 |        |
|----------------|------------------|-----------------|--------|
| TCONS_00076941 | Itih5_j1         | mmu-miR-299-3p  | -0.036 |
| TCONS_00076941 | Itih5_j1         | mmu-miR-466d-5p | -0.041 |
| TCONS_00076941 | Itih5_j1         | mmu-miR-29b-3p  | -0.137 |
| TCONS_00076941 | Itih5_j1         | rno-let-7f-1*   | -0.31  |
| TCONS_00076941 | Itih5_j1         | mmu-let-7a-1-3p | -0.279 |
| TCONS_00077084 | Upp2_j12         | mmu-miR-298-5p  | -0.12  |
| TCONS_00077125 | Plekha3_j3       | mmu-miR-154-3p  | -0.126 |
| TCONS_00077125 | Plekha3_j3       | mmu-miR-298-5p  | -0.14  |
| TCONS_00077125 | Plekha3_j3       | mmu-miR-299-3p  | -0.434 |
| TCONS_00077143 | Tnks1bp1_j7      | mmu-miR-2137    | -0.518 |
| TCONS_00077204 | Spint1_j1        | mmu-miR-298-5p  | -0.195 |
| TCONS_00077204 | Spint1_j1        | mmu-miR-466d-5p | -0.227 |
| TCONS_00077238 | 2310003F16Rik_j2 | mmu-miR-544-3p  | -0.196 |
| TCONS_00077238 | 2310003F16Rik_j2 | mmu-miR-9-3p    | -0.046 |
| TCONS_00077238 | 2310003F16Rik_j2 | mmu-miR-19b-3p  | -0.022 |
| TCONS_00077238 | 2310003F16Rik_j2 | mmu-miR-29b-3p  | -0.182 |
| TCONS_00077238 | 2310003F16Rik_j2 | mmu-miR-298-5p  | -0.138 |
| TCONS_00077240 | Wdr76            | mmu-miR-544-3p  | -0.05  |
| TCONS_00077240 | Wdr76            | mmu-miR-299-3p  | -0.085 |
| TCONS_00077256 | Fgf7_j1          | rno-let-7f-1*   | -0.175 |
| TCONS_00077256 | Fgf7_j1          | mmu-let-7a-1-3p | -0.175 |
| TCONS_00077369 | Dlgap4_j1        | mmu-miR-544-3p  | -0.049 |
| TCONS_00077369 | Dlgap4_j1        | mmu-miR-29b-3p  | -0.088 |
| TCONS_00077518 | A830007P12Rik_j2 | mmu-miR-466d-5p | -4.58  |
| TCONS_00077756 | Eif3m_j3         | mmu-miR-544-3p  | -0.113 |
| TCONS_00077756 | Eif3m_j3         | mmu-miR-154-3p  | -0.039 |
| TCONS_00077955 | Sdc4_j1          | mmu-miR-298-5p  | -0.098 |
| TCONS_00077955 | Sdc4_j1          | mmu-miR-544-3p  | -0.1   |
| TCONS_00077984 | Zfp217           | mmu-miR-19b-3p  | -0.097 |
| TCONS_00077984 | Zfp217           | mmu-miR-154-3p  | -0.111 |
| TCONS_00078351 | Bend7_j3         | mmu-miR-298-5p  | -0.045 |
| TCONS_00078366 | Vim_j6           | mmu-miR-298-5p  | -0.157 |
| TCONS_00078402 | Abca2_j6         | mmu-miR-9-3p    | -0.048 |
| TCONS_00078402 | Abca2_j6         | mmu-miR-298-5p  | -0.049 |
| TCONS_00078402 | Abca2_j6         | mmu-let-7a-1-3p | -0.09  |
| TCONS_00078402 | Abca2_j6         | rno-let-7f-1*   | -0.09  |
| TCONS_00078402 | Abca2_j6         | mmu-miR-299-3p  | -0.147 |
| TCONS_00078402 | Abca2_j6         | mmu-miR-19b-3p  | -0.082 |
| TCONS_00078476 | St6galnac6_j1    | mmu-miR-29b-3p  | -0.012 |
| TCONS_00078476 | St6galnac6_j1    | mmu-miR-544-3p  | -0.045 |
| TCONS_00078723 | Csrp2bp_j1       | mmu-miR-154-3p  | -0.049 |
| TCONS_00078990 | Notch1_j1        | rno-let-7f-1*   | -0.166 |
| TCONS_00078990 | Notch1_j1        | mmu-miR-544-3p  | -0.052 |
| TCONS_00078990 | Notch1_j1        | mmu-let-7a-1-3p | -0.187 |
| TCONS_00078990 | Notch1_j1        | mmu-miR-19b-3p  | -0.05  |
| TCONS_00079106 | Sp3_j3           | mmu-miR-467b-5p | -0.416 |
| TCONS_00079106 | Sp3_j3           | mmu-miR-154-3p  | -0.361 |

|                |                   |                 |        |
|----------------|-------------------|-----------------|--------|
| TCONS_00079145 | 1110051M20Rik_j2  | mmu-miR-298-5p  | -0.171 |
| TCONS_00079145 | 1110051M20Rik_j2  | mmu-miR-9-3p    | -0.046 |
| TCONS_00079184 | Mett5d1_j3        | mmu-miR-9-3p    | -0.165 |
| TCONS_00079197 | Bmf_j4            | mmu-miR-29b-3p  | -0.542 |
| TCONS_00079197 | Bmf_j4            | mmu-miR-298-5p  | -0.061 |
| TCONS_00079197 | Bmf_j4            | mmu-miR-544-3p  | -0.001 |
| TCONS_00079197 | Bmf_j4            | mmu-miR-19b-3p  | -0.175 |
| TCONS_00079255 | Zfp661            | mmu-miR-298-5p  | -0.222 |
| TCONS_00079255 | Zfp661            | mmu-miR-467b-5p | -0.126 |
| TCONS_00079255 | Zfp661            | mmu-miR-9-3p    | -0.069 |
| TCONS_00079255 | Zfp661            | mmu-miR-19b-3p  | -0.225 |
| TCONS_00079255 | Zfp661            | mmu-miR-544-3p  | -0.26  |
| TCONS_00079292 | Flrt3_j1          | mmu-miR-9-3p    | -0.017 |
| TCONS_00079292 | Flrt3_j1          | mmu-miR-466d-5p | -0.056 |
| TCONS_00079321 | Ahcy_j2           | mmu-miR-298-5p  | -0.185 |
| TCONS_00079391 | Cyp24a1           | mmu-miR-9-3p    | -0.095 |
| TCONS_00079414 | Lama5_j2          | mmu-miR-466d-5p | -0.041 |
| TCONS_00079816 | Car3              | mmu-miR-467b-5p | -0.024 |
| TCONS_00079816 | Car3              | mmu-miR-29b-3p  | -0.112 |
| TCONS_00079890 | Kcnmb2_j3         | mmu-miR-544-3p  | -0.351 |
| TCONS_00080157 | Shc1_j9           | mmu-miR-298-5p  | -0.139 |
| TCONS_00080157 | Shc1_j9           | mmu-miR-544-3p  | -0.01  |
| TCONS_00080160 | Pbxip1_j2         | mmu-miR-299-3p  | -0.104 |
| TCONS_00080160 | Pbxip1_j2         | mmu-miR-466d-5p | -0.542 |
| TCONS_00080160 | Pbxip1_j2         | mmu-miR-29b-3p  | -0.057 |
| TCONS_00080459 | Dpyd_j1           | mmu-miR-154-3p  | -0.111 |
| TCONS_00080484 | Ndst4             | mmu-miR-299-3p  | -0.177 |
| TCONS_00080484 | Ndst4             | mmu-miR-466d-5p | -0.004 |
| TCONS_00080484 | Ndst4             | mmu-miR-544-3p  | -0.029 |
| TCONS_00080484 | Ndst4             | rno-let-7f-1*   | -0.051 |
| TCONS_00080484 | Ndst4             | mmu-let-7a-1-3p | -0.031 |
| TCONS_00080485 | Ndst4_j1          | rno-let-7f-1*   | -0.057 |
| TCONS_00080485 | Ndst4_j1          | mmu-miR-299-3p  | -0.17  |
| TCONS_00080485 | Ndst4_j1          | mmu-miR-466d-5p | -0.004 |
| TCONS_00080485 | Ndst4_j1          | mmu-let-7a-1-3p | -0.036 |
| TCONS_00080485 | Ndst4_j1          | mmu-miR-544-3p  | -0.033 |
| TCONS_00080493 | 4930422G04Rik_j14 | mmu-miR-466d-5p | -0.129 |
| TCONS_00080493 | 4930422G04Rik_j14 | mmu-miR-19b-3p  | -0.037 |
| TCONS_00080493 | 4930422G04Rik_j14 | mmu-miR-299-3p  | -0.113 |
| TCONS_00080494 | Tifa_j1           | mmu-miR-19b-3p  | -0.133 |
| TCONS_00080494 | Tifa_j1           | mmu-miR-544-3p  | -0.11  |
| TCONS_00080494 | Tifa_j1           | mmu-miR-466d-5p | -5.97  |
| TCONS_00080536 | Manba             | mmu-miR-9-3p    | -0.054 |
| TCONS_00080536 | Manba             | mmu-miR-29b-3p  | -0.154 |
| TCONS_00080538 | Slc39a8           | mmu-miR-9-3p    | -0.031 |
| TCONS_00080538 | Slc39a8           | mmu-miR-466d-5p | -0.059 |
| TCONS_00080538 | Slc39a8           | mmu-miR-544-3p  | -0.029 |

|                |               |                 |        |
|----------------|---------------|-----------------|--------|
| TCONS_00080577 | Gbp2_j1       | mmu-miR-544-3p  | -0.088 |
| TCONS_00080577 | Gbp2_j1       | mmu-let-7a-1-3p | -0.008 |
| TCONS_00080577 | Gbp2_j1       | mmu-miR-466d-5p | -0.201 |
| TCONS_00080609 | Lpar3_j2      | mmu-miR-466d-5p | -0.112 |
| TCONS_00080609 | Lpar3_j2      | mmu-miR-298-5p  | -0.292 |
| TCONS_00080609 | Lpar3_j2      | mmu-miR-2137    | -0.93  |
| TCONS_00080907 | Gria2_j6      | mmu-miR-544-3p  | -0.017 |
| TCONS_00080907 | Gria2_j6      | mmu-miR-467b-5p | -0.145 |
| TCONS_00080907 | Gria2_j6      | mmu-miR-466d-5p | -0.221 |
| TCONS_00080907 | Gria2_j6      | mmu-miR-298-5p  | -0.227 |
| TCONS_00080912 | Gria2_j11     | mmu-miR-467b-5p | -0.084 |
| TCONS_00080924 | Lrat          | mmu-miR-467b-5p | -0.172 |
| TCONS_00080924 | Lrat          | mmu-miR-466d-5p | -0.255 |
| TCONS_00080924 | Lrat          | mmu-miR-19b-3p  | -0.048 |
| TCONS_00081104 | Fcgr1         | mmu-miR-299-3p  | -0.219 |
| TCONS_00081104 | Fcgr1         | mmu-miR-544-3p  | -0.277 |
| TCONS_00081195 | 4933431E20Rik | mmu-miR-298-5p  | -0.057 |
| TCONS_00081195 | 4933431E20Rik | mmu-miR-466d-5p | -0.014 |
| TCONS_00081276 | Rwdd3_j5      | mmu-miR-298-5p  | -0.15  |
| TCONS_00081306 | Larp7_j2      | mmu-miR-544-3p  | -0.044 |
| TCONS_00081967 | Egfem1_j6     | mmu-miR-29b-3p  | -0.234 |
| TCONS_00081967 | Egfem1_j6     | mmu-miR-19b-3p  | -0.214 |
| TCONS_00081967 | Egfem1_j6     | mmu-miR-466d-5p | -1.06  |
| TCONS_00081991 | Ttc14_j2      | mmu-miR-9-3p    | -0.029 |
| TCONS_00081991 | Ttc14_j2      | mmu-miR-298-5p  | -0.142 |
| TCONS_00081991 | Ttc14_j2      | mmu-miR-19b-3p  | -0.073 |
| TCONS_00081991 | Ttc14_j2      | mmu-miR-299-3p  | -0.164 |
| TCONS_00082068 | Med12l_j9     | mmu-miR-298-5p  | -0.385 |
| TCONS_00082068 | Med12l_j9     | mmu-miR-29b-3p  | -0.16  |
| TCONS_00082235 | Ankrd35       | mmu-miR-29b-3p  | -0.166 |
| TCONS_00082442 | Pigk_j2       | mmu-miR-9-3p    | -0.212 |
| TCONS_00082490 | Pde7a_j1      | mmu-miR-544-3p  | -0.14  |
| TCONS_00082490 | Pde7a_j1      | mmu-miR-298-5p  | -0.167 |
| TCONS_00082646 | Rps3a_j9      | mmu-miR-298-5p  | -0.08  |
| TCONS_00082646 | Rps3a_j9      | mmu-miR-466d-5p | -0.047 |
| TCONS_00082646 | Rps3a_j9      | mmu-miR-467b-5p | -0.364 |
| TCONS_00082646 | Rps3a_j9      | mmu-let-7a-1-3p | -0.022 |
| TCONS_00082646 | Rps3a_j9      | rno-let-7f-1*   | -0.013 |
| TCONS_00082652 | Fcrls_j1      | mmu-miR-466d-5p | -0.136 |
| TCONS_00082903 | Bmpr1b_j9     | rno-let-7f-1*   | -0.126 |
| TCONS_00082903 | Bmpr1b_j9     | mmu-let-7a-1-3p | -0.108 |
| TCONS_00082928 | St6galnac3_j4 | mmu-miR-298-5p  | -0.29  |
| TCONS_00082928 | St6galnac3_j4 | mmu-miR-299-3p  | -0.182 |
| TCONS_00082928 | St6galnac3_j4 | mmu-miR-29b-3p  | -0.282 |
| TCONS_00082928 | St6galnac3_j4 | mmu-miR-544-3p  | -0.125 |
| TCONS_00082928 | St6galnac3_j4 | mmu-miR-467b-5p | -0.04  |
| TCONS_00083319 | Hltf          | mmu-miR-299-3p  | -0.226 |

|                |             |                 |        |
|----------------|-------------|-----------------|--------|
| TCONS_00083319 | Hltf        | mmu-miR-467b-5p | -0.084 |
| TCONS_00083319 | Hltf        | mmu-miR-154-3p  | -0.072 |
| TCONS_00083319 | Hltf        | mmu-miR-9-3p    | -0.162 |
| TCONS_00083387 | Fam48a_j4   | mmu-miR-19b-3p  | -0.378 |
| TCONS_00083472 | Tpm3_j2     | mmu-miR-298-5p  | -0.026 |
| TCONS_00083475 | Gatad2b_j3  | mmu-miR-19b-3p  | -0.277 |
| TCONS_00083475 | Gatad2b_j3  | mmu-miR-298-5p  | -0.148 |
| TCONS_00083475 | Gatad2b_j3  | mmu-miR-467b-5p | -0.202 |
| TCONS_00083475 | Gatad2b_j3  | mmu-miR-466d-5p | -0.065 |
| TCONS_00083479 | S100a6_j3   | mmu-miR-467b-5p | -0.074 |
| TCONS_00083635 | Cxhc4_j2    | mmu-miR-466d-5p | -0.007 |
| TCONS_00083635 | Cxhc4_j2    | mmu-miR-9-3p    | -0.214 |
| TCONS_00083635 | Cxhc4_j2    | mmu-miR-544-3p  | -0.08  |
| TCONS_00083640 | Nhedc2_j4   | mmu-miR-9-3p    | -0.14  |
| TCONS_00083644 | Slc39a8_j1  | mmu-miR-466d-5p | -0.056 |
| TCONS_00083644 | Slc39a8_j1  | mmu-miR-544-3p  | -0.014 |
| TCONS_00083644 | Slc39a8_j1  | mmu-miR-19b-3p  | -0.148 |
| TCONS_00083680 | Ctbs_j3     | mmu-miR-466d-5p | -0.417 |
| TCONS_00083680 | Ctbs_j3     | mmu-let-7a-1-3p | -0.023 |
| TCONS_00083680 | Ctbs_j3     | mmu-miR-154-3p  | -0.189 |
| TCONS_00083680 | Ctbs_j3     | rno-let-7f-1*   | -0.02  |
| TCONS_00083816 | P2ry13      | mmu-miR-466d-5p | -0.314 |
| TCONS_00083816 | P2ry13      | mmu-miR-299-3p  | -0.152 |
| TCONS_00084065 | Aimp1_j2    | mmu-miR-544-3p  | -0.116 |
| TCONS_00084065 | Aimp1_j2    | mmu-miR-299-3p  | -0.104 |
| TCONS_00084099 | Ptgef_j2    | mmu-miR-466d-5p | -0.62  |
| TCONS_00084418 | Car3_j1     | mmu-miR-467b-5p | -0.018 |
| TCONS_00084418 | Car3_j1     | mmu-miR-29b-3p  | -0.092 |
| TCONS_00084428 | XLOC_020782 | mmu-miR-29b-3p  | -0.293 |
| TCONS_00084428 | XLOC_020782 | mmu-miR-154-3p  | -0.065 |
| TCONS_00084428 | XLOC_020782 | mmu-miR-19b-3p  | -0.358 |
| TCONS_00084429 | Tnfsf10_j2  | mmu-miR-466d-5p | -0.074 |
| TCONS_00084564 | Adar_j1     | mmu-miR-29b-3p  | -0.046 |
| TCONS_00084581 | XLOC_020987 | mmu-miR-466d-5p | -1.81  |
| TCONS_00084581 | XLOC_020987 | mmu-miR-467b-5p | -0.183 |
| TCONS_00084581 | XLOC_020987 | mmu-miR-298-5p  | -0.196 |
| TCONS_00084581 | XLOC_020987 | mmu-miR-299-3p  | -0.494 |
| TCONS_00084581 | XLOC_020987 | mmu-let-7a-1-3p | -0.066 |
| TCONS_00084581 | XLOC_020987 | rno-let-7f-1*   | -0.047 |
| TCONS_00084761 | Uox_j1      | mmu-let-7a-1-3p | -0.141 |
| TCONS_00084761 | Uox_j1      | rno-let-7f-1*   | -0.151 |
| TCONS_00084761 | Uox_j1      | mmu-miR-544-3p  | -0.181 |
| TCONS_00084789 | Il7_j4      | rno-let-7f-1*   | -0.011 |
| TCONS_00084789 | Il7_j4      | mmu-miR-467b-5p | -0.389 |
| TCONS_00084789 | Il7_j4      | mmu-let-7a-1-3p | -0.014 |
| TCONS_00084789 | Il7_j4      | mmu-miR-299-3p  | -0.253 |
| TCONS_00084887 | Golim4_j3   | mmu-miR-154-3p  | -0.065 |

|                |                  |                 |        |
|----------------|------------------|-----------------|--------|
| TCONS_00084887 | Golim4_j3        | mmu-let-7a-1-3p | -0.091 |
| TCONS_00084887 | Golim4_j3        | rno-let-7f-1*   | -0.091 |
| TCONS_00084904 | Rps3a_j5         | mmu-miR-467b-5p | -0.238 |
| TCONS_00084904 | Rps3a_j5         | mmu-miR-29b-3p  | -0.141 |
| TCONS_00084904 | Rps3a_j5         | rno-let-7f-1*   | -0.013 |
| TCONS_00084904 | Rps3a_j5         | mmu-miR-298-5p  | -0.403 |
| TCONS_00084904 | Rps3a_j5         | mmu-let-7a-1-3p | -0.022 |
| TCONS_00084952 | 2500003M10Rik_j4 | mmu-miR-299-3p  | -0.116 |
| TCONS_00084952 | 2500003M10Rik_j4 | mmu-miR-467b-5p | -0.078 |
| TCONS_00084952 | 2500003M10Rik_j4 | mmu-miR-298-5p  | -0.232 |
| TCONS_00085046 | Celsr2_j4        | mmu-miR-298-5p  | -0.091 |
| TCONS_00085046 | Celsr2_j4        | mmu-miR-2137    | -0.325 |
| TCONS_00085109 | Bmpr1b_j2        | mmu-let-7a-1-3p | -0.101 |
| TCONS_00085109 | Bmpr1b_j2        | rno-let-7f-1*   | -0.119 |
| TCONS_00085109 | Bmpr1b_j2        | mmu-miR-9-3p    | -0.104 |
| TCONS_00085123 | Lphn2_j5         | mmu-miR-298-5p  | -0.151 |
| TCONS_00085123 | Lphn2_j5         | rno-let-7f-1*   | -0.16  |
| TCONS_00085123 | Lphn2_j5         | mmu-let-7a-1-3p | -0.122 |
| TCONS_00085123 | Lphn2_j5         | mmu-miR-19b-3p  | -0.251 |
| TCONS_00085421 | Sox2ot_j7        | mmu-miR-2137    | -0.289 |
| TCONS_00085421 | Sox2ot_j7        | mmu-miR-466d-5p | -1.24  |
| TCONS_00085653 | Prss12_j1        | mmu-miR-544-3p  | -0.037 |
| TCONS_00085776 | Qrfpr            | mmu-miR-29b-3p  | -0.293 |
| TCONS_00085787 | Frem2_j2         | mmu-miR-544-3p  | -0.002 |
| TCONS_00085787 | Frem2_j2         | mmu-miR-467b-5p | -0.058 |
| TCONS_00085787 | Frem2_j2         | mmu-miR-29b-3p  | -0.188 |
| TCONS_00085787 | Frem2_j2         | mmu-let-7a-1-3p | -0.081 |
| TCONS_00085787 | Frem2_j2         | rno-let-7f-1*   | -0.092 |
| TCONS_00085880 | Lelp1_j1         | mmu-miR-298-5p  | -0.477 |
| TCONS_00085880 | Lelp1_j1         | mmu-miR-29b-3p  | -0.219 |
| TCONS_00085952 | Fam40a_j1        | mmu-miR-466d-5p | -0.053 |
| TCONS_00085952 | Fam40a_j1        | mmu-miR-298-5p  | -0.319 |
| TCONS_00085963 | Stxbp3a_j2       | mmu-miR-154-3p  | -0.388 |
| TCONS_00086305 | Hltf_j5          | mmu-miR-9-3p    | -0.14  |
| TCONS_00086305 | Hltf_j5          | mmu-miR-299-3p  | -0.226 |
| TCONS_00086305 | Hltf_j5          | mmu-miR-154-3p  | -0.062 |
| TCONS_00086305 | Hltf_j5          | mmu-miR-467b-5p | -0.084 |
| TCONS_00086332 | Ttc14_j1         | mmu-miR-9-3p    | -0.027 |
| TCONS_00086332 | Ttc14_j1         | mmu-miR-19b-3p  | -0.073 |
| TCONS_00086332 | Ttc14_j1         | mmu-miR-298-5p  | -0.142 |
| TCONS_00086332 | Ttc14_j1         | mmu-miR-299-3p  | -0.162 |
| TCONS_00086405 | Ptx3_j2          | mmu-miR-29b-3p  | -0.22  |
| TCONS_00086455 | Shc1_j7          | mmu-miR-298-5p  | -0.139 |
| TCONS_00086455 | Shc1_j7          | mmu-miR-154-3p  | -0.001 |
| TCONS_00086455 | Shc1_j7          | mmu-miR-544-3p  | -0.023 |
| TCONS_00086506 | Fmo5_j3          | mmu-miR-299-3p  | -0.334 |
| TCONS_00086717 | Trim59_j1        | mmu-let-7a-1-3p | -0.102 |

|                |               |                 |        |
|----------------|---------------|-----------------|--------|
| TCONS_00086717 | Trim59_j1     | rno-let-7f-1*   | -0.102 |
| TCONS_00086740 | Rps3a_j3      | mmu-miR-467b-5p | -0.219 |
| TCONS_00086740 | Rps3a_j3      | mmu-miR-29b-3p  | -0.141 |
| TCONS_00086802 | Nudt17_j1     | mmu-miR-298-5p  | -0.176 |
| TCONS_00086911 | Hs2st1_j2     | mmu-miR-467b-5p | -0.007 |
| TCONS_00086911 | Hs2st1_j2     | mmu-miR-299-3p  | -0.108 |
| TCONS_00086911 | Hs2st1_j2     | mmu-miR-466d-5p | -0.1   |
| TCONS_00086911 | Hs2st1_j2     | mmu-miR-298-5p  | -0.149 |
| TCONS_00087353 | Unc13b_j3     | mmu-miR-29b-3p  | -0.508 |
| TCONS_00087353 | Unc13b_j3     | mmu-miR-466d-5p | -3.66  |
| TCONS_00087353 | Unc13b_j3     | mmu-miR-467b-5p | -0.104 |
| TCONS_00087353 | Unc13b_j3     | mmu-miR-544-3p  | -0.232 |
| TCONS_00087475 | Palm2_j4      | mmu-miR-466d-5p | -0.057 |
| TCONS_00087475 | Palm2_j4      | mmu-miR-19b-3p  | -0.032 |
| TCONS_00087572 | Acer2_j1      | mmu-miR-298-5p  | -0.189 |
| TCONS_00087572 | Acer2_j1      | mmu-miR-466d-5p | -0.126 |
| TCONS_00087572 | Acer2_j1      | mmu-miR-29b-3p  | -0.203 |
| TCONS_00087572 | Acer2_j1      | mmu-miR-19b-3p  | -0.204 |
| TCONS_00087693 | Faf1          | mmu-miR-9-3p    | -0.003 |
| TCONS_00087693 | Faf1          | mmu-miR-298-5p  | -0.168 |
| TCONS_00087693 | Faf1          | mmu-miR-544-3p  | -0.145 |
| TCONS_00088010 | Htr1d         | mmu-miR-298-5p  | -0.081 |
| TCONS_00088010 | Htr1d         | mmu-miR-299-3p  | -0.036 |
| TCONS_00088010 | Htr1d         | mmu-miR-467b-5p | -0.044 |
| TCONS_00088016 | Wnt4          | mmu-miR-466d-5p | -0.816 |
| TCONS_00088016 | Wnt4          | mmu-miR-298-5p  | -0.016 |
| TCONS_00088034 | Eif4g3_j4     | mmu-miR-544-3p  | -0.055 |
| TCONS_00088034 | Eif4g3_j4     | rno-let-7f-1*   | -0.114 |
| TCONS_00088034 | Eif4g3_j4     | mmu-let-7a-1-3p | -0.114 |
| TCONS_00088050 | Pla2g2d       | mmu-miR-299-3p  | -0.093 |
| TCONS_00088083 | 6330545A04Rik | mmu-miR-466d-5p | -0.313 |
| TCONS_00088083 | 6330545A04Rik | mmu-miR-19b-3p  | -0.035 |
| TCONS_00088083 | 6330545A04Rik | mmu-miR-298-5p  | -0.042 |
| TCONS_00088145 | Gm13203_j1    | mmu-miR-466d-5p | -0.278 |
| TCONS_00088158 | XLOC_023268   | mmu-miR-29b-3p  | -0.193 |
| TCONS_00088158 | XLOC_023268   | mmu-miR-544-3p  | -0.082 |
| TCONS_00088158 | XLOC_023268   | mmu-miR-466d-5p | -0.093 |
| TCONS_00088158 | XLOC_023268   | mmu-miR-9-3p    | -0.149 |
| TCONS_00088208 | Ttc34_j2      | mmu-miR-299-3p  | -0.281 |
| TCONS_00088208 | Ttc34_j2      | mmu-miR-9-3p    | -0.034 |
| TCONS_00088301 | Slc26a7_j3    | mmu-miR-9-3p    | -0.164 |
| TCONS_00088301 | Slc26a7_j3    | mmu-miR-29b-3p  | -0.201 |
| TCONS_00088301 | Slc26a7_j3    | mmu-miR-154-3p  | -0.029 |
| TCONS_00088301 | Slc26a7_j3    | mmu-miR-466d-5p | -0.135 |
| TCONS_00088301 | Slc26a7_j3    | mmu-miR-19b-3p  | -0.33  |
| TCONS_00088301 | Slc26a7_j3    | mmu-miR-467b-5p | -0.761 |
| TCONS_00088317 | Wwp1_j8       | mmu-miR-9-3p    | -0.006 |



|                |                  |                 |        |
|----------------|------------------|-----------------|--------|
| TCONS_00088330 | Klhl32           | mmu-miR-9-3p    | -0.12  |
| TCONS_00088330 | Klhl32           | mmu-miR-29b-3p  | -0.217 |
| TCONS_00088367 | Mobkl2b_j1       | mmu-miR-154-3p  | -0.102 |
| TCONS_00088367 | Mobkl2b_j1       | mmu-miR-19b-3p  | -0.204 |
| TCONS_00088367 | Mobkl2b_j1       | mmu-miR-299-3p  | -0.024 |
| TCONS_00088367 | Mobkl2b_j1       | mmu-miR-467b-5p | -0.07  |
| TCONS_00088367 | Mobkl2b_j1       | mmu-miR-9-3p    | -0.046 |
| TCONS_00088475 | Baat_j1          | rno-let-7f-1*   | -0.286 |
| TCONS_00088475 | Baat_j1          | mmu-miR-544-3p  | -0.074 |
| TCONS_00088475 | Baat_j1          | mmu-miR-299-3p  | -0.139 |
| TCONS_00088475 | Baat_j1          | mmu-let-7a-1-3p | -0.254 |
| TCONS_00088499 | Epb4.1l4b_j10    | mmu-miR-19b-3p  | -0.131 |
| TCONS_00088501 | Epb4.1l4b_j5     | mmu-miR-19b-3p  | -0.154 |
| TCONS_00088510 | Svep1_j4         | mmu-miR-298-5p  | -0.334 |
| TCONS_00088522 | Rod1_j4          | mmu-miR-299-3p  | -0.088 |
| TCONS_00088522 | Rod1_j4          | mmu-miR-154-3p  | -0.173 |
| TCONS_00088522 | Rod1_j4          | rno-let-7f-1*   | -0.118 |
| TCONS_00088522 | Rod1_j4          | mmu-miR-29b-3p  | -0.161 |
| TCONS_00088522 | Rod1_j4          | mmu-let-7a-1-3p | -0.146 |
| TCONS_00088537 | Alad             | mmu-miR-544-3p  | -0.034 |
| TCONS_00088537 | Alad             | mmu-miR-467b-5p | -0.361 |
| TCONS_00088537 | Alad             | mmu-miR-298-5p  | -0.158 |
| TCONS_00088537 | Alad             | mmu-miR-466d-5p | -1.32  |
| TCONS_00088565 | Rasef_j4         | mmu-miR-19b-3p  | -0.236 |
| TCONS_00088565 | Rasef_j4         | mmu-let-7a-1-3p | -0.36  |
| TCONS_00088565 | Rasef_j4         | rno-let-7f-1*   | -0.411 |
| TCONS_00088565 | Rasef_j4         | mmu-miR-298-5p  | -0.074 |
| TCONS_00088565 | Rasef_j4         | mmu-miR-466d-5p | -0.056 |
| TCONS_00088566 | Rasef_j2         | mmu-miR-466d-5p | -0.052 |
| TCONS_00088566 | Rasef_j2         | rno-let-7f-1*   | -0.402 |
| TCONS_00088566 | Rasef_j2         | mmu-let-7a-1-3p | -0.351 |
| TCONS_00088566 | Rasef_j2         | mmu-miR-154-3p  | -0.09  |
| TCONS_00088744 | Tspan1_j1        | mmu-miR-467b-5p | -0.132 |
| TCONS_00088747 | Mast2_j5         | mmu-miR-466d-5p | -0.126 |
| TCONS_00088747 | Mast2_j5         | mmu-miR-19b-3p  | -0.038 |
| TCONS_00088846 | Macf1_j1         | mmu-miR-19b-3p  | -0.199 |
| TCONS_00088846 | Macf1_j1         | mmu-miR-544-3p  | -0.104 |
| TCONS_00088846 | Macf1_j1         | mmu-miR-467b-5p | -0.013 |
| TCONS_00088863 | 1700029G01Rik_j8 | mmu-miR-19b-3p  | -0.087 |
| TCONS_00089052 | C1qc_j1          | mmu-miR-298-5p  | -0.155 |
| TCONS_00089053 | C1qc             | mmu-miR-298-5p  | -0.155 |
| TCONS_00089053 | C1qc             | mmu-miR-544-3p  | -0.063 |
| TCONS_00089053 | C1qc             | mmu-miR-299-3p  | -0.095 |
| TCONS_00089054 | C1qa             | mmu-miR-298-5p  | -0.077 |
| TCONS_00089166 | 2610109H07Rik    | mmu-miR-29b-3p  | -0.077 |
| TCONS_00089810 | Tmem55a_j1       | mmu-miR-9-3p    | -0.062 |
| TCONS_00089810 | Tmem55a_j1       | rno-let-7f-1*   | -0.11  |

|                |                  |                 |        |
|----------------|------------------|-----------------|--------|
| TCONS_00089810 | Tmem55a_j1       | mmu-let-7a-1-3p | -0.107 |
| TCONS_00089922 | Tmod1_j2         | mmu-miR-544-3p  | -0.17  |
| TCONS_00089922 | Tmod1_j2         | mmu-miR-466d-5p | -0.105 |
| TCONS_00089967 | Akap2_j5         | mmu-miR-19b-3p  | -0.026 |
| TCONS_00089967 | Akap2_j5         | mmu-miR-466d-5p | -0.057 |
| TCONS_00089993 | Col27a1_j13      | mmu-miR-2137    | -0.331 |
| TCONS_00089993 | Col27a1_j13      | mmu-miR-298-5p  | -0.128 |
| TCONS_00090097 | Ttc22_j1         | mmu-miR-466d-5p | -0.072 |
| TCONS_00090097 | Ttc22_j1         | mmu-miR-467b-5p | -0.226 |
| TCONS_00090199 | Pabpc4_j8        | mmu-miR-29b-3p  | -0.081 |
| TCONS_00090199 | Pabpc4_j8        | mmu-miR-466d-5p | -0.222 |
| TCONS_00090212 | Rspo1_j1         | mmu-miR-466d-5p | -4.66  |
| TCONS_00090212 | Rspo1_j1         | mmu-let-7a-1-3p | -0.049 |
| TCONS_00090212 | Rspo1_j1         | rno-let-7f-1*   | -0.035 |
| TCONS_00090221 | Oscp1            | mmu-miR-466d-5p | -0.299 |
| TCONS_00090221 | Oscp1            | mmu-miR-299-3p  | -0.092 |
| TCONS_00090238 | Zmym6_j4         | mmu-miR-467b-5p | -0.255 |
| TCONS_00090419 | Lrrc38           | mmu-miR-9-3p    | -0.034 |
| TCONS_00090419 | Lrrc38           | mmu-miR-19b-3p  | -0.078 |
| TCONS_00090420 | Dhrs3_j1         | mmu-miR-544-3p  | -0.088 |
| TCONS_00090549 | 9430015G10Rik_j9 | mmu-miR-544-3p  | -0.127 |
| TCONS_00090549 | 9430015G10Rik_j9 | mmu-miR-9-3p    | -0.125 |
| TCONS_00090574 | Ints8_j4         | mmu-miR-298-5p  | -0.1   |
| TCONS_00090574 | Ints8_j4         | mmu-miR-154-3p  | -0.061 |
| TCONS_00090585 | Wwp1             | mmu-miR-466d-5p | -0.177 |
| TCONS_00090585 | Wwp1             | mmu-miR-467b-5p | -0.037 |
| TCONS_00090585 | Wwp1             | mmu-miR-544-3p  | -0.186 |
| TCONS_00090585 | Wwp1             | mmu-miR-19b-3p  | -0.14  |
| TCONS_00090585 | Wwp1             | rno-let-7f-1*   | -0.024 |
| TCONS_00090585 | Wwp1             | mmu-miR-29b-3p  | -0.402 |
| TCONS_00090585 | Wwp1             | mmu-let-7a-1-3p | -0.035 |
| TCONS_00090585 | Wwp1             | mmu-miR-299-3p  | -0.045 |
| TCONS_00090692 | Ikbkap_j6        | mmu-miR-544-3p  | -0.053 |
| TCONS_00090855 | Cyp4b1_j1        | mmu-miR-298-5p  | -0.105 |
| TCONS_00090871 | Rps8_j7          | mmu-miR-466d-5p | -0.158 |
| TCONS_00090934 | 1110065P20Rik_j1 | mmu-miR-467b-5p | -0.238 |
| TCONS_00090934 | 1110065P20Rik_j1 | mmu-miR-298-5p  | -0.115 |
| TCONS_00090934 | 1110065P20Rik_j1 | mmu-miR-466d-5p | -0.033 |
| TCONS_00090946 | Thrap3_j3        | mmu-miR-466d-5p | -0.076 |
| TCONS_00091632 | Chd7_j1          | mmu-miR-299-3p  | -0.198 |
| TCONS_00091632 | Chd7_j1          | mmu-miR-466d-5p | -1.17  |
| TCONS_00091632 | Chd7_j1          | mmu-miR-9-3p    | -0.083 |
| TCONS_00091741 | Tgfbr1_j2        | mmu-miR-9-3p    | -0.057 |
| TCONS_00091741 | Tgfbr1_j2        | mmu-miR-298-5p  | -0.213 |
| TCONS_00091772 | Zkscan16_j2      | mmu-miR-19b-3p  | -0.216 |
| TCONS_00091772 | Zkscan16_j2      | mmu-miR-154-3p  | -0.087 |
| TCONS_00091772 | Zkscan16_j2      | mmu-miR-544-3p  | -0.273 |

|                |              |                 |        |
|----------------|--------------|-----------------|--------|
| TCONS_00091772 | Zkscan16_j2  | mmu-miR-466d-5p | -0.116 |
| TCONS_00091788 | Zfp618_j2    | mmu-miR-298-5p  | -0.077 |
| TCONS_00091788 | Zfp618_j2    | mmu-miR-467b-5p | -0.079 |
| TCONS_00091788 | Zfp618_j2    | mmu-miR-466d-5p | -3.32  |
| TCONS_00091888 | Faf1_j3      | mmu-miR-19b-3p  | -0.108 |
| TCONS_00091949 | Nt5c1a       | mmu-miR-299-3p  | -0.288 |
| TCONS_00091949 | Nt5c1a       | mmu-miR-298-5p  | -0.07  |
| TCONS_00091949 | Nt5c1a       | mmu-miR-29b-3p  | -0.07  |
| TCONS_00091949 | Nt5c1a       | mmu-miR-466d-5p | -0.089 |
| TCONS_00092014 | Pum1         | mmu-miR-298-5p  | -0.295 |
| TCONS_00092014 | Pum1         | mmu-miR-544-3p  | -0.094 |
| TCONS_00092027 | Gpatch3_j3   | mmu-miR-298-5p  | -0.265 |
| TCONS_00092027 | Gpatch3_j3   | mmu-miR-299-3p  | -0.04  |
| TCONS_00092135 | XLOC_023268  | mmu-miR-298-5p  | -0.368 |
| TCONS_00092135 | XLOC_023268  | mmu-miR-9-3p    | -0.007 |
| TCONS_00092135 | XLOC_023268  | mmu-miR-299-3p  | -0.143 |
| TCONS_00092135 | XLOC_023268  | mmu-miR-466d-5p | -0.451 |
| TCONS_00092198 | Plag1        | mmu-miR-19b-3p  | -0.049 |
| TCONS_00092198 | Plag1        | mmu-let-7a-1-3p | -0.411 |
| TCONS_00092198 | Plag1        | mmu-miR-29b-3p  | -0.343 |
| TCONS_00092198 | Plag1        | rno-let-7f-1*   | -0.381 |
| TCONS_00092198 | Plag1        | mmu-miR-466d-5p | -0.032 |
| TCONS_00092210 | Ints8        | mmu-miR-466d-5p | -0.355 |
| TCONS_00092227 | Wwp1_j2      | rno-let-7f-1*   | -0.024 |
| TCONS_00092227 | Wwp1_j2      | mmu-miR-544-3p  | -0.207 |
| TCONS_00092227 | Wwp1_j2      | mmu-miR-299-3p  | -0.045 |
| TCONS_00092227 | Wwp1_j2      | mmu-let-7a-1-3p | -0.035 |
| TCONS_00092227 | Wwp1_j2      | mmu-miR-467b-5p | -0.037 |
| TCONS_00092227 | Wwp1_j2      | mmu-miR-466d-5p | -0.571 |
| TCONS_00092227 | Wwp1_j2      | mmu-miR-19b-3p  | -0.14  |
| TCONS_00092227 | Wwp1_j2      | mmu-miR-29b-3p  | -0.438 |
| TCONS_00092241 | Orc3_j3      | mmu-miR-9-3p    | -0.009 |
| TCONS_00092241 | Orc3_j3      | mmu-miR-29b-3p  | -0.022 |
| TCONS_00092241 | Orc3_j3      | mmu-miR-467b-5p | -0.039 |
| TCONS_00092314 | Epb4.1l4b_j1 | mmu-miR-19b-3p  | -0.131 |
| TCONS_00092359 | XLOC_023541  | mmu-let-7a-1-3p | -0.012 |
| TCONS_00092359 | XLOC_023541  | mmu-miR-298-5p  | -0.106 |
| TCONS_00092359 | XLOC_023541  | mmu-miR-466d-5p | -0.015 |
| TCONS_00092359 | XLOC_023541  | mmu-miR-2137    | -0.335 |
| TCONS_00092445 | Cdc20_j2     | mmu-miR-466d-5p | -0.047 |
| TCONS_00092477 | Maneal_j2    | mmu-miR-466d-5p | -0.036 |
| TCONS_00092477 | Maneal_j2    | mmu-miR-2137    | -0.156 |
| TCONS_00092477 | Maneal_j2    | mmu-miR-298-5p  | -0.122 |
| TCONS_00092477 | Maneal_j2    | mmu-miR-544-3p  | -0.107 |
| TCONS_00092477 | Maneal_j2    | mmu-miR-299-3p  | -0.172 |
| TCONS_00092477 | Maneal_j2    | mmu-miR-467b-5p | -0.245 |
| TCONS_00092509 | Hpca_j2      | mmu-miR-466d-5p | -4.81  |

|                |              |                 |        |
|----------------|--------------|-----------------|--------|
| TCONS_00092509 | Hpca_j2      | mmu-miR-19b-3p  | -0.097 |
| TCONS_00092509 | Hpca_j2      | mmu-miR-544-3p  | -0.064 |
| TCONS_00092509 | Hpca_j2      | mmu-miR-298-5p  | -0.271 |
| TCONS_00092509 | Hpca_j2      | mmu-miR-467b-5p | -0.123 |
| TCONS_00092577 | Zbtb40_j2    | mmu-miR-544-3p  | -0.113 |
| TCONS_00092577 | Zbtb40_j2    | mmu-miR-298-5p  | -0.023 |
| TCONS_00093210 | Usp24_j5     | mmu-miR-298-5p  | -0.227 |
| TCONS_00093210 | Usp24_j5     | mmu-miR-19b-3p  | -0.07  |
| TCONS_00093329 | Marcksl1_j1  | mmu-miR-544-3p  | -0.058 |
| TCONS_00093335 | Bai2_j3      | mmu-miR-298-5p  | -0.093 |
| TCONS_00093341 | Pum1_j12     | mmu-let-7a-1-3p | -0.091 |
| TCONS_00093341 | Pum1_j12     | rno-let-7f-1*   | -0.101 |
| TCONS_00093341 | Pum1_j12     | mmu-miR-544-3p  | -0.067 |
| TCONS_00093347 | Map3k6_j3    | mmu-miR-2137    | -0.289 |
| TCONS_00093613 | Epb4.1l4b_j8 | mmu-miR-19b-3p  | -0.154 |
| TCONS_00093635 | Akna_j1      | mmu-miR-298-5p  | -0.376 |
| TCONS_00093641 | Cdk5rap2_j4  | mmu-miR-299-3p  | -0.103 |
| TCONS_00093641 | Cdk5rap2_j4  | mmu-miR-19b-3p  | -0.066 |
| TCONS_00093641 | Cdk5rap2_j4  | mmu-miR-298-5p  | -0.108 |
| TCONS_00093641 | Cdk5rap2_j4  | mmu-miR-466d-5p | -0.882 |
| TCONS_00093701 | Podn         | mmu-miR-466d-5p | -6.07  |
| TCONS_00093701 | Podn         | mmu-miR-298-5p  | -0.087 |
| TCONS_00093729 | B4galt2_j1   | mmu-miR-19b-3p  | -0.135 |
| TCONS_00093771 | Thrap3_j14   | mmu-miR-298-5p  | -0.102 |
| TCONS_00093771 | Thrap3_j14   | mmu-miR-544-3p  | -0.058 |
| TCONS_00093792 | Hdac1_j10    | mmu-miR-299-3p  | -0.096 |
| TCONS_00093792 | Hdac1_j10    | mmu-miR-466d-5p | -0.171 |
| TCONS_00093833 | C1qa_j1      | mmu-miR-298-5p  | -0.077 |
| TCONS_00093909 | Ajap1        | mmu-miR-544-3p  | -0.045 |
| TCONS_00093909 | Ajap1        | mmu-miR-466d-5p | -1.68  |
| TCONS_00093910 | Prdm16       | mmu-miR-467b-5p | -0.176 |
| TCONS_00093910 | Prdm16       | mmu-miR-298-5p  | -0.001 |
| TCONS_00094430 | Txndc12_j1   | mmu-miR-467b-5p | -0.033 |
| TCONS_00094430 | Txndc12_j1   | mmu-miR-298-5p  | -0.09  |
| TCONS_00094430 | Txndc12_j1   | mmu-miR-19b-3p  | -0.007 |
| TCONS_00094430 | Txndc12_j1   | mmu-miR-544-3p  | -0.103 |
| TCONS_00094445 | lpp_j2       | mmu-miR-298-5p  | -0.076 |
| TCONS_00094445 | lpp_j2       | mmu-miR-154-3p  | -0.089 |
| TCONS_00094445 | lpp_j2       | mmu-miR-467b-5p | -0.03  |
| TCONS_00094445 | lpp_j2       | mmu-miR-19b-3p  | -0.042 |
| TCONS_00094584 | Zbtb17_j4    | mmu-miR-544-3p  | -0.057 |
| TCONS_00094622 | Acot7_j4     | mmu-miR-9-3p    | -0.143 |
| TCONS_00094704 | Ddx58_j2     | rno-let-7f-1*   | -0.12  |
| TCONS_00094704 | Ddx58_j2     | mmu-miR-299-3p  | -0.056 |
| TCONS_00094704 | Ddx58_j2     | mmu-miR-19b-3p  | -0.119 |
| TCONS_00094704 | Ddx58_j2     | mmu-let-7a-1-3p | -0.162 |
| TCONS_00094704 | Ddx58_j2     | mmu-miR-298-5p  | -0.399 |

|                |                  |                 |        |
|----------------|------------------|-----------------|--------|
| TCONS_00094704 | Ddx58_j2         | mmu-miR-29b-3p  | -0.198 |
| TCONS_00094704 | Ddx58_j2         | mmu-miR-466d-5p | -0.098 |
| TCONS_00094753 | Epb4.1l4b_j3     | mmu-miR-19b-3p  | -0.154 |
| TCONS_00094789 | Ptprd_j10        | mmu-miR-298-5p  | -0.055 |
| TCONS_00094789 | Ptprd_j10        | mmu-miR-19b-3p  | -0.171 |
| TCONS_00094789 | Ptprd_j10        | mmu-miR-154-3p  | -0.031 |
| TCONS_00094859 | Nasp_j1          | mmu-miR-29b-3p  | -0.848 |
| TCONS_00094859 | Nasp_j1          | rno-let-7f-1*   | -0.184 |
| TCONS_00094859 | Nasp_j1          | mmu-miR-19b-3p  | -0.118 |
| TCONS_00094859 | Nasp_j1          | mmu-let-7a-1-3p | -0.184 |
| TCONS_00094863 | Btbd19_j6        | mmu-miR-298-5p  | -0.168 |
| TCONS_00094863 | Btbd19_j6        | mmu-miR-9-3p    | -0.054 |
| TCONS_00094969 | Grhl3_j3         | mmu-miR-298-5p  | -0.061 |
| TCONS_00095006 | 2610109H07Rik_j1 | mmu-miR-298-5p  | -0.095 |
| TCONS_00095006 | 2610109H07Rik_j1 | mmu-miR-29b-3p  | -0.048 |
| TCONS_00095038 | Prdm16_j1        | mmu-miR-298-5p  | -0.015 |
| TCONS_00095038 | Prdm16_j1        | mmu-miR-467b-5p | -0.174 |
| TCONS_00095380 | Chd7_j7          | mmu-miR-2137    | -0.547 |
| TCONS_00095380 | Chd7_j7          | mmu-miR-299-3p  | -0.203 |
| TCONS_00095380 | Chd7_j7          | mmu-miR-466d-5p | -0.068 |
| TCONS_00095380 | Chd7_j7          | mmu-miR-29b-3p  | -0.108 |
| TCONS_00095868 | Cd72             | mmu-miR-19b-3p  | -0.147 |
| TCONS_00095977 | AK021368         | mmu-miR-299-3p  | -0.147 |
| TCONS_00096044 | Macf1_j3         | mmu-miR-544-3p  | -0.113 |
| TCONS_00096044 | Macf1_j3         | mmu-miR-19b-3p  | -0.156 |
| TCONS_00096076 | Rbbp4_j1         | mmu-miR-466d-5p | -0.142 |
| TCONS_00096161 | Tmem51_j2        | mmu-miR-466d-5p | -0.063 |
| TCONS_00096710 | Fosl2_j1         | mmu-miR-19b-3p  | -0.131 |
| TCONS_00096710 | Fosl2_j1         | rno-let-7f-1*   | -0.062 |
| TCONS_00096710 | Fosl2_j1         | mmu-miR-298-5p  | -0.035 |
| TCONS_00096710 | Fosl2_j1         | mmu-let-7a-1-3p | -0.084 |
| TCONS_00096710 | Fosl2_j1         | mmu-miR-154-3p  | -0.113 |
| TCONS_00096715 | Yes1             | mmu-miR-154-3p  | -0.087 |
| TCONS_00096715 | Yes1             | mmu-miR-544-3p  | -0.055 |
| TCONS_00096715 | Yes1             | mmu-let-7a-1-3p | -0.021 |
| TCONS_00096715 | Yes1             | mmu-miR-466d-5p | -0.577 |
| TCONS_00096715 | Yes1             | mmu-miR-298-5p  | -0.049 |
| TCONS_00096715 | Yes1             | rno-let-7f-1*   | -0.02  |
| TCONS_00096774 | Ppp2r2c_j2       | mmu-miR-29b-3p  | -0.073 |
| TCONS_00096849 | Pgm1_j7          | mmu-miR-544-3p  | -0.059 |
| TCONS_00096849 | Pgm1_j7          | mmu-miR-298-5p  | -0.128 |
| TCONS_00096863 | Wdr19_j5         | mmu-miR-154-3p  | -0.252 |
| TCONS_00096863 | Wdr19_j5         | mmu-miR-298-5p  | -0.332 |
| TCONS_00096863 | Wdr19_j5         | mmu-miR-466d-5p | -0.198 |
| TCONS_00096863 | Wdr19_j5         | mmu-miR-9-3p    | -0.059 |
| TCONS_00096977 | Areg             | mmu-miR-154-3p  | -0.074 |
| TCONS_00097003 | Fras1_j5         | mmu-miR-298-5p  | -0.358 |

|                |             |                 |        |
|----------------|-------------|-----------------|--------|
| TCONS_00097003 | Fras1_j5    | mmu-miR-19b-3p  | -0.303 |
| TCONS_00097003 | Fras1_j5    | mmu-miR-29b-3p  | -0.233 |
| TCONS_00097003 | Fras1_j5    | mmu-miR-299-3p  | -0.329 |
| TCONS_00097003 | Fras1_j5    | mmu-miR-544-3p  | -0.02  |
| TCONS_00097003 | Fras1_j5    | mmu-miR-466d-5p | -0.139 |
| TCONS_00097139 | Acacb_j2    | mmu-miR-19b-3p  | -0.055 |
| TCONS_00097204 | Hrk         | mmu-miR-298-5p  | -0.232 |
| TCONS_00097204 | Hrk         | mmu-miR-29b-3p  | -0.072 |
| TCONS_00097204 | Hrk         | mmu-miR-19b-3p  | -0.109 |
| TCONS_00097527 | Trrap_j2    | mmu-miR-19b-3p  | -0.04  |
| TCONS_00097742 | Spon2_j1    | mmu-miR-19b-3p  | -0.11  |
| TCONS_00097742 | Spon2_j1    | mmu-miR-299-3p  | -0.092 |
| TCONS_00097761 | Poln_j8     | mmu-miR-544-3p  | -0.345 |
| TCONS_00097779 | Htra3       | mmu-miR-299-3p  | -0.252 |
| TCONS_00097779 | Htra3       | mmu-miR-298-5p  | -0.447 |
| TCONS_00097804 | Zbtb49_j5   | mmu-miR-544-3p  | -0.242 |
| TCONS_00097804 | Zbtb49_j5   | rno-let-7f-1*   | -0.146 |
| TCONS_00097804 | Zbtb49_j5   | mmu-let-7a-1-3p | -0.183 |
| TCONS_00097804 | Zbtb49_j5   | mmu-miR-154-3p  | -0.089 |
| TCONS_00097804 | Zbtb49_j5   | mmu-miR-298-5p  | -0.179 |
| TCONS_00098004 | Rasgef1b_j5 | mmu-miR-298-5p  | -0.105 |
| TCONS_00098028 | Wdfy3_j1    | mmu-miR-19b-3p  | -0.181 |
| TCONS_00098028 | Wdfy3_j1    | mmu-miR-544-3p  | -0.237 |
| TCONS_00098028 | Wdfy3_j1    | mmu-miR-29b-3p  | -0.132 |
| TCONS_00098028 | Wdfy3_j1    | mmu-let-7a-1-3p | -0.024 |
| TCONS_00098028 | Wdfy3_j1    | rno-let-7f-1*   | -0.017 |
| TCONS_00098104 | Fbrsl1      | mmu-miR-467b-5p | -0.068 |
| TCONS_00098104 | Fbrsl1      | mmu-miR-19b-3p  | -0.12  |
| TCONS_00098114 | Ep400_j9    | mmu-miR-298-5p  | -0.022 |
| TCONS_00098114 | Ep400_j9    | mmu-miR-29b-3p  | -0.21  |
| TCONS_00098114 | Ep400_j9    | mmu-miR-9-3p    | -0.02  |
| TCONS_00098114 | Ep400_j9    | mmu-miR-299-3p  | -0.065 |
| TCONS_00098129 | Cryba4_j2   | mmu-miR-299-3p  | -0.108 |
| TCONS_00098250 | Cux2_j5     | mmu-let-7a-1-3p | -0.253 |
| TCONS_00098250 | Cux2_j5     | mmu-miR-466d-5p | -1.54  |
| TCONS_00098250 | Cux2_j5     | mmu-miR-467b-5p | -0.009 |
| TCONS_00098250 | Cux2_j5     | rno-let-7f-1*   | -0.222 |
| TCONS_00098355 | Limk1_j1    | mmu-miR-466d-5p | -0.272 |
| TCONS_00098388 | Serpine1    | mmu-miR-154-3p  | -0.061 |
| TCONS_00098388 | Serpine1    | mmu-miR-298-5p  | -0.099 |
| TCONS_00098388 | Serpine1    | mmu-miR-466d-5p | -0.076 |
| TCONS_00098388 | Serpine1    | mmu-miR-544-3p  | -0.128 |
| TCONS_00099254 | Abhd1_j6    | mmu-miR-298-5p  | -0.231 |
| TCONS_00099254 | Abhd1_j6    | mmu-miR-544-3p  | -0.21  |
| TCONS_00099329 | Jakmip1_j5  | mmu-miR-467b-5p | -0.443 |
| TCONS_00099329 | Jakmip1_j5  | mmu-miR-19b-3p  | -0.238 |
| TCONS_00099712 | Gpr133      | mmu-let-7a-1-3p | -0.038 |

|                |             |                 |        |
|----------------|-------------|-----------------|--------|
| TCONS_00099712 | Gpr133      | mmu-miR-298-5p  | -0.069 |
| TCONS_00099712 | Gpr133      | mmu-miR-544-3p  | -0.079 |
| TCONS_00099712 | Gpr133      | rno-let-7f-1*   | -0.038 |
| TCONS_00099765 | Vgf_j7      | mmu-miR-466d-5p | -0.07  |
| TCONS_00099793 | Fam20c_j3   | mmu-miR-544-3p  | -0.062 |
| TCONS_00100161 | Rasgef1b_j1 | mmu-miR-298-5p  | -0.245 |
| TCONS_00101147 | Slc34a2_j1  | mmu-let-7a-1-3p | -0.064 |
| TCONS_00101147 | Slc34a2_j1  | rno-let-7f-1*   | -0.064 |
| TCONS_00101147 | Slc34a2_j1  | mmu-miR-298-5p  | -0.034 |
| TCONS_00101237 | Ppbbp       | mmu-miR-298-5p  | -0.488 |
| TCONS_00101302 | XLOC_025402 | mmu-miR-9-3p    | -0.108 |
| TCONS_00101302 | XLOC_025402 | mmu-miR-298-5p  | -0.245 |
| TCONS_00101302 | XLOC_025402 | mmu-miR-544-3p  | -0.03  |
| TCONS_00101302 | XLOC_025402 | mmu-miR-19b-3p  | -0.055 |
| TCONS_00101345 | Vsig10_j3   | mmu-miR-29b-3p  | -0.123 |
| TCONS_00101345 | Vsig10_j3   | mmu-miR-299-3p  | -0.109 |
| TCONS_00101345 | Vsig10_j3   | mmu-miR-19b-3p  | -0.052 |
| TCONS_00101584 | Mll3_j10    | mmu-let-7a-1-3p | -0.207 |
| TCONS_00101584 | Mll3_j10    | rno-let-7f-1*   | -0.213 |
| TCONS_00101584 | Mll3_j10    | mmu-miR-544-3p  | -0.073 |
| TCONS_00101585 | Mll3_j11    | mmu-miR-544-3p  | -0.073 |
| TCONS_00101585 | Mll3_j11    | mmu-let-7a-1-3p | -0.207 |
| TCONS_00101585 | Mll3_j11    | rno-let-7f-1*   | -0.213 |
| TCONS_00101645 | Bod1l_j2    | mmu-miR-154-3p  | -0.179 |
| TCONS_00101645 | Bod1l_j2    | mmu-let-7a-1-3p | -0.101 |
| TCONS_00101645 | Bod1l_j2    | rno-let-7f-1*   | -0.111 |
| TCONS_00101645 | Bod1l_j2    | mmu-miR-544-3p  | -0.106 |
| TCONS_00101645 | Bod1l_j2    | mmu-miR-9-3p    | -0.152 |
| TCONS_00101647 | Prom1_j4    | mmu-miR-544-3p  | -0.11  |
| TCONS_00101647 | Prom1_j4    | mmu-miR-299-3p  | -0.148 |
| TCONS_00101758 | Hfm1_j2     | mmu-miR-19b-3p  | -0.078 |
| TCONS_00101758 | Hfm1_j2     | mmu-miR-544-3p  | -0.137 |
| TCONS_00101828 | Gm13826_j1  | mmu-miR-298-5p  | -0.108 |
| TCONS_00101828 | Gm13826_j1  | mmu-miR-19b-3p  | -0.333 |
| TCONS_00102013 | Gm15411_j1  | mmu-miR-298-5p  | -0.326 |
| TCONS_00102412 | Magi2_j10   | mmu-miR-29b-3p  | -0.024 |
| TCONS_00102412 | Magi2_j10   | mmu-miR-19b-3p  | -0.033 |
| TCONS_00102428 | Gm7361      | mmu-miR-544-3p  | -0.734 |
| TCONS_00102428 | Gm7361      | mmu-miR-466d-5p | -0.07  |
| TCONS_00102428 | Gm7361      | mmu-miR-299-3p  | -0.018 |
| TCONS_00102428 | Gm7361      | mmu-miR-29b-3p  | -0.316 |
| TCONS_00102448 | Il6_j1      | mmu-let-7a-1-3p | -0.028 |
| TCONS_00102448 | Il6_j1      | rno-let-7f-1*   | -0.032 |
| TCONS_00102460 | Trim54_j1   | mmu-miR-466d-5p | -0.006 |
| TCONS_00102476 | Depdc5_j9   | mmu-miR-19b-3p  | -0.087 |
| TCONS_00102476 | Depdc5_j9   | mmu-miR-298-5p  | -0.229 |
| TCONS_00102476 | Depdc5_j9   | mmu-miR-544-3p  | -0.165 |

|                |                  |                 |        |
|----------------|------------------|-----------------|--------|
| TCONS_00102477 | Depdc5_j10       | mmu-miR-19b-3p  | -0.087 |
| TCONS_00102523 | AK080411_j1      | mmu-miR-9-3p    | -0.064 |
| TCONS_00102621 | Anxa3_j3         | mmu-miR-298-5p  | -0.124 |
| TCONS_00102669 | Galnt9_j2        | mmu-miR-299-3p  | -0.11  |
| TCONS_00102669 | Galnt9_j2        | mmu-miR-9-3p    | -0.115 |
| TCONS_00102718 | Vsig10_j2        | mmu-miR-29b-3p  | -0.123 |
| TCONS_00102718 | Vsig10_j2        | mmu-miR-19b-3p  | -0.049 |
| TCONS_00102718 | Vsig10_j2        | mmu-miR-299-3p  | -0.106 |
| TCONS_00102763 | XLOC_025519      | mmu-miR-544-3p  | -0.058 |
| TCONS_00102763 | XLOC_025519      | mmu-miR-466d-5p | -0.085 |
| TCONS_00102763 | XLOC_025519      | mmu-miR-298-5p  | -0.153 |
| TCONS_00102799 | XLOC_025579      | mmu-miR-298-5p  | -0.306 |
| TCONS_00102807 | BC055004_j3      | mmu-miR-29b-3p  | -0.043 |
| TCONS_00102807 | BC055004_j3      | mmu-miR-299-3p  | -0.05  |
| TCONS_00102885 | A330021E22Rik_j8 | mmu-miR-29b-3p  | -0.143 |
| TCONS_00102885 | A330021E22Rik_j8 | mmu-miR-9-3p    | -0.346 |
| TCONS_00102885 | A330021E22Rik_j8 | mmu-miR-544-3p  | -0.339 |
| TCONS_00102885 | A330021E22Rik_j8 | mmu-miR-467b-5p | -0.127 |
| TCONS_00103020 | XLOC_025899      | mmu-miR-9-3p    | -0.05  |
| TCONS_00103118 | Ep400_j6         | mmu-miR-9-3p    | -0.014 |
| TCONS_00103118 | Ep400_j6         | mmu-miR-299-3p  | -0.065 |
| TCONS_00103118 | Ep400_j6         | mmu-miR-29b-3p  | -0.21  |
| TCONS_00103118 | Ep400_j6         | mmu-miR-298-5p  | -0.208 |
| TCONS_00103168 | Trafd1_j5        | mmu-miR-29b-3p  | -0.216 |
| TCONS_00103194 | Gm16001          | mmu-miR-299-3p  | -0.086 |
| TCONS_00103260 | Gpc2             | mmu-miR-544-3p  | -0.066 |
| TCONS_00103855 | Srp72_j1         | mmu-miR-467b-5p | -0.007 |
| TCONS_00103855 | Srp72_j1         | mmu-miR-466d-5p | -0.041 |
| TCONS_00103855 | Srp72_j1         | mmu-miR-9-3p    | -0.108 |
| TCONS_00103874 | Shroom3_j4       | mmu-miR-466d-5p | -5.33  |
| TCONS_00103921 | Ddx51_j1         | mmu-let-7a-1-3p | -0.171 |
| TCONS_00103921 | Ddx51_j1         | mmu-miR-544-3p  | -0.001 |
| TCONS_00103921 | Ddx51_j1         | mmu-miR-466d-5p | -0.053 |
| TCONS_00103921 | Ddx51_j1         | mmu-miR-299-3p  | -0.053 |
| TCONS_00103921 | Ddx51_j1         | rno-let-7f-1*   | -0.178 |
| TCONS_00103947 | Oasl1            | mmu-miR-298-5p  | -0.301 |
| TCONS_00103980 | Gm15800_j1       | mmu-miR-154-3p  | -0.139 |
| TCONS_00104250 | Kctd8_j1         | mmu-miR-467b-5p | -0.137 |
| TCONS_00104403 | Kdm2b_j8         | mmu-miR-298-5p  | -0.151 |
| TCONS_00104403 | Kdm2b_j8         | mmu-miR-29b-3p  | -0.213 |
| TCONS_00104403 | Kdm2b_j8         | mmu-miR-2137    | -0.466 |
| TCONS_00104482 | Mmd2_j2          | mmu-miR-298-5p  | -0.118 |
| TCONS_00104884 | Magi2_j3         | mmu-miR-29b-3p  | -0.023 |
| TCONS_00104884 | Magi2_j3         | mmu-miR-19b-3p  | -0.033 |
| TCONS_00104900 | Gm7361_j6        | mmu-miR-29b-3p  | -0.383 |
| TCONS_00104900 | Gm7361_j6        | mmu-miR-544-3p  | -0.734 |
| TCONS_00104900 | Gm7361_j6        | mmu-miR-466d-5p | -0.07  |



|                |             |                 |        |
|----------------|-------------|-----------------|--------|
| TCONS_00104900 | Gm7361_j6   | mmu-miR-299-3p  | -0.047 |
| TCONS_00104996 | Tmem33_j1   | mmu-miR-9-3p    | -0.148 |
| TCONS_00104996 | Tmem33_j1   | mmu-miR-544-3p  | -0.075 |
| TCONS_00104996 | Tmem33_j1   | rno-let-7f-1*   | -0.11  |
| TCONS_00104996 | Tmem33_j1   | mmu-let-7a-1-3p | -0.055 |
| TCONS_00104996 | Tmem33_j1   | mmu-miR-29b-3p  | -0.14  |
| TCONS_00105041 | Parm1_j1    | mmu-miR-19b-3p  | -0.117 |
| TCONS_00105041 | Parm1_j1    | mmu-miR-544-3p  | -0.1   |
| TCONS_00105067 | lbsp_j1     | mmu-miR-29b-3p  | -0.393 |
| TCONS_00105166 | Hip1r_j2    | mmu-miR-467b-5p | -0.048 |
| TCONS_00105166 | Hip1r_j2    | mmu-miR-466d-5p | -0.02  |
| TCONS_00105166 | Hip1r_j2    | mmu-miR-544-3p  | -0.063 |
| TCONS_00105220 | Rasa4_j5    | mmu-miR-299-3p  | -0.152 |
| TCONS_00105240 | Amz1_j6     | mmu-miR-299-3p  | -0.136 |
| TCONS_00105240 | Amz1_j6     | mmu-miR-298-5p  | -0.353 |
| TCONS_00105292 | Gm17019_j1  | mmu-miR-544-3p  | -0.309 |
| TCONS_00105317 | Xrcc2_j1    | rno-let-7f-1*   | -0.149 |
| TCONS_00105317 | Xrcc2_j1    | mmu-miR-299-3p  | -0.015 |
| TCONS_00105317 | Xrcc2_j1    | mmu-let-7a-1-3p | -0.139 |
| TCONS_00105317 | Xrcc2_j1    | mmu-miR-9-3p    | -0.105 |
| TCONS_00105317 | Xrcc2_j1    | mmu-miR-298-5p  | -0.071 |
| TCONS_00105317 | Xrcc2_j1    | mmu-miR-466d-5p | -0.253 |
| TCONS_00105456 | XLOC_025977 | mmu-miR-466d-5p | -0.197 |
| TCONS_00105474 | Ep400_j12   | mmu-miR-9-3p    | -0.031 |
| TCONS_00105474 | Ep400_j12   | mmu-miR-298-5p  | -0.309 |
| TCONS_00105474 | Ep400_j12   | mmu-miR-29b-3p  | -0.159 |
| TCONS_00105474 | Ep400_j12   | mmu-miR-299-3p  | -0.066 |
| TCONS_00105529 | Kdm2b_j11   | mmu-miR-2137    | -0.467 |
| TCONS_00105529 | Kdm2b_j11   | mmu-miR-29b-3p  | -0.217 |
| TCONS_00105529 | Kdm2b_j11   | mmu-miR-298-5p  | -0.154 |
| TCONS_00105552 | Ncor2_j2    | mmu-miR-29b-3p  | -0.131 |
| TCONS_00105552 | Ncor2_j2    | mmu-miR-298-5p  | -0.032 |
| TCONS_00105613 | Micall2_j2  | mmu-miR-29b-3p  | -0.109 |
| TCONS_00105976 | Peg10_j4    | mmu-miR-19b-3p  | -0.033 |
| TCONS_00106061 | Flnc        | mmu-miR-298-5p  | -0.339 |
| TCONS_00106061 | Flnc        | mmu-miR-19b-3p  | -0.309 |
| TCONS_00106095 | Lrguk_j2    | mmu-miR-298-5p  | -0.249 |
| TCONS_00106095 | Lrguk_j2    | mmu-miR-299-3p  | -0.12  |
| TCONS_00106216 | Gimap1_j3   | mmu-miR-9-3p    | -0.223 |
| TCONS_00106249 | Prr15       | mmu-miR-19b-3p  | -0.119 |
| TCONS_00106343 | Dqx1_j1     | mmu-miR-29b-3p  | -0.06  |
| TCONS_00106549 | Slc6a11     | mmu-miR-466d-5p | -0.154 |
| TCONS_00106549 | Slc6a11     | mmu-miR-299-3p  | -0.053 |
| TCONS_00106558 | Syn2        | rno-let-7f-1*   | -0.005 |
| TCONS_00106558 | Syn2        | mmu-miR-298-5p  | -0.104 |
| TCONS_00106558 | Syn2        | mmu-let-7a-1-3p | -0.019 |
| TCONS_00106558 | Syn2        | mmu-miR-467b-5p | -0.037 |

|                |             |                 |        |
|----------------|-------------|-----------------|--------|
| TCONS_00106558 | Syn2        | mmu-miR-466d-5p | -0.092 |
| TCONS_00106600 | Rasgef1a    | rno-let-7f-1*   | -0.108 |
| TCONS_00106600 | Rasgef1a    | mmu-miR-544-3p  | -0.12  |
| TCONS_00106600 | Rasgef1a    | mmu-let-7a-1-3p | -0.108 |
| TCONS_00106632 | Mfap5_j1    | mmu-miR-29b-3p  | -0.696 |
| TCONS_00106632 | Mfap5_j1    | mmu-miR-544-3p  | -0.095 |
| TCONS_00106636 | Clec4a1     | mmu-miR-544-3p  | -0.132 |
| TCONS_00106636 | Clec4a1     | mmu-miR-466d-5p | -0.241 |
| TCONS_00106639 | Clec4a2     | mmu-miR-154-3p  | -0.264 |
| TCONS_00106639 | Clec4a2     | mmu-miR-466d-5p | -0.216 |
| TCONS_00106639 | Clec4a2     | mmu-miR-299-3p  | -0.371 |
| TCONS_00106809 | AK087382    | mmu-miR-466d-5p | -0.705 |
| TCONS_00106809 | AK087382    | mmu-miR-298-5p  | -0.422 |
| TCONS_00106809 | AK087382    | mmu-miR-2137    | -0.26  |
| TCONS_00106809 | AK087382    | mmu-miR-19b-3p  | -0.059 |
| TCONS_00106864 | Tspan12_j1  | mmu-miR-544-3p  | -0.252 |
| TCONS_00107039 | Nod1_j4     | mmu-miR-298-5p  | -0.179 |
| TCONS_00107039 | Nod1_j4     | mmu-miR-544-3p  | -0.089 |
| TCONS_00107054 | Ppm1k       | mmu-miR-544-3p  | -0.001 |
| TCONS_00107054 | Ppm1k       | mmu-miR-299-3p  | -0.133 |
| TCONS_00107054 | Ppm1k       | mmu-miR-466d-5p | -0.112 |
| TCONS_00107170 | Aplf_j1     | mmu-miR-19b-3p  | -0.345 |
| TCONS_00107170 | Aplf_j1     | mmu-miR-298-5p  | -0.092 |
| TCONS_00107170 | Aplf_j1     | mmu-miR-544-3p  | -0.243 |
| TCONS_00107202 | Wnt7a       | mmu-miR-466d-5p | -0.106 |
| TCONS_00107202 | Wnt7a       | mmu-miR-299-3p  | -0.085 |
| TCONS_00107249 | Cntn3_j4    | mmu-miR-544-3p  | -0.019 |
| TCONS_00107249 | Cntn3_j4    | mmu-miR-466d-5p | -5.49  |
| TCONS_00107249 | Cntn3_j4    | mmu-miR-154-3p  | -0.248 |
| TCONS_00107249 | Cntn3_j4    | mmu-miR-467b-5p | -0.249 |
| TCONS_00107267 | Rad18_j1    | mmu-miR-9-3p    | -0.047 |
| TCONS_00107290 | Tmem40_j2   | mmu-miR-298-5p  | -0.113 |
| TCONS_00107294 | BC060267_j4 | mmu-miR-298-5p  | -0.242 |
| TCONS_00107294 | BC060267_j4 | mmu-miR-466d-5p | -0.647 |
| TCONS_00107300 | Mbd4_j3     | mmu-miR-466d-5p | -0.421 |
| TCONS_00107300 | Mbd4_j3     | mmu-miR-299-3p  | -0.155 |
| TCONS_00107300 | Mbd4_j3     | mmu-miR-298-5p  | -0.517 |
| TCONS_00107300 | Mbd4_j3     | mmu-let-7a-1-3p | -0.007 |
| TCONS_00107300 | Mbd4_j3     | mmu-miR-544-3p  | -0.157 |
| TCONS_00107300 | Mbd4_j3     | rno-let-7f-1*   | -0.011 |
| TCONS_00107380 | C3ar1       | mmu-miR-544-3p  | -0.036 |
| TCONS_00107380 | C3ar1       | mmu-miR-298-5p  | -0.336 |
| TCONS_00107380 | C3ar1       | mmu-miR-9-3p    | -0.046 |
| TCONS_00108057 | Flnc_j3     | mmu-miR-298-5p  | -0.208 |
| TCONS_00108057 | Flnc_j3     | mmu-miR-19b-3p  | -0.309 |
| TCONS_00108277 | Pcgf1_j2    | mmu-let-7a-1-3p | -0.016 |
| TCONS_00108277 | Pcgf1_j2    | rno-let-7f-1*   | -0.016 |

|                |             |                 |        |
|----------------|-------------|-----------------|--------|
| TCONS_00108277 | Pcgf1_j2    | mmu-miR-298-5p  | -0.035 |
| TCONS_00108277 | Pcgf1_j2    | mmu-miR-2137    | -0.18  |
| TCONS_00108277 | Pcgf1_j2    | mmu-miR-544-3p  | -0.046 |
| TCONS_00108436 | Rasgef1a_j5 | mmu-miR-544-3p  | -0.12  |
| TCONS_00108436 | Rasgef1a_j5 | rno-let-7f-1*   | -0.108 |
| TCONS_00108436 | Rasgef1a_j5 | mmu-let-7a-1-3p | -0.108 |
| TCONS_00108491 | Tnfrsf1a_j3 | mmu-miR-29b-3p  | -0.378 |
| TCONS_00108614 | Grm8_j4     | rno-let-7f-1*   | -0.087 |
| TCONS_00108614 | Grm8_j4     | mmu-let-7a-1-3p | -0.076 |
| TCONS_00108617 | Gcc1        | rno-let-7f-1*   | -0.157 |
| TCONS_00108617 | Gcc1        | mmu-let-7a-1-3p | -0.146 |
| TCONS_00108617 | Gcc1        | mmu-miR-298-5p  | -0.09  |
| TCONS_00108619 | Rbm28_j2    | mmu-miR-19b-3p  | -0.026 |
| TCONS_00108619 | Rbm28_j2    | mmu-miR-298-5p  | -0.088 |
| TCONS_00108868 | Srgap3_j1   | mmu-miR-298-5p  | -0.005 |
| TCONS_00108868 | Srgap3_j1   | mmu-miR-544-3p  | -0.006 |
| TCONS_00108868 | Srgap3_j1   | mmu-miR-299-3p  | -0.053 |
| TCONS_00108868 | Srgap3_j1   | mmu-miR-466d-5p | -0.068 |
| TCONS_00108874 | Prrt3       | mmu-miR-19b-3p  | -0.307 |
| TCONS_00108874 | Prrt3       | mmu-miR-298-5p  | -0.155 |
| TCONS_00108874 | Prrt3       | mmu-miR-9-3p    | -0.078 |
| TCONS_00109443 | Nxph1_j3    | mmu-miR-19b-3p  | -0.124 |
| TCONS_00109443 | Nxph1_j3    | mmu-miR-467b-5p | -0.085 |
| TCONS_00109570 | AK043004_j6 | mmu-miR-299-3p  | -0.29  |
| TCONS_00109570 | AK043004_j6 | mmu-miR-544-3p  | -0.031 |
| TCONS_00109659 | Ccdc48_j3   | mmu-miR-544-3p  | -0.037 |
| TCONS_00109659 | Ccdc48_j3   | mmu-miR-19b-3p  | -0.382 |
| TCONS_00109665 | Gm5577      | rno-let-7f-1*   | -0.009 |
| TCONS_00109665 | Gm5577      | mmu-let-7a-1-3p | -0.013 |
| TCONS_00109700 | Fam19a1_j4  | mmu-miR-9-3p    | -0.165 |
| TCONS_00109700 | Fam19a1_j4  | mmu-miR-466d-5p | -0.148 |
| TCONS_00109703 | Mitf_j5     | mmu-miR-9-3p    | -0.016 |
| TCONS_00109703 | Mitf_j5     | mmu-miR-544-3p  | -0.062 |
| TCONS_00109703 | Mitf_j5     | mmu-miR-154-3p  | -0.021 |
| TCONS_00109703 | Mitf_j5     | mmu-miR-298-5p  | -0.333 |
| TCONS_00109703 | Mitf_j5     | rno-let-7f-1*   | -0.129 |
| TCONS_00109703 | Mitf_j5     | mmu-let-7a-1-3p | -0.125 |
| TCONS_00109757 | Cecr2_j3    | mmu-miR-19b-3p  | -0.045 |
| TCONS_00109757 | Cecr2_j3    | mmu-miR-466d-5p | -0.378 |
| TCONS_00109757 | Cecr2_j3    | mmu-let-7a-1-3p | -0.083 |
| TCONS_00109757 | Cecr2_j3    | rno-let-7f-1*   | -0.096 |
| TCONS_00109757 | Cecr2_j3    | mmu-miR-29b-3p  | -0.363 |
| TCONS_00109828 | Dera_j1     | mmu-miR-29b-3p  | -0.192 |
| TCONS_00109828 | Dera_j1     | mmu-miR-467b-5p | -0.116 |
| TCONS_00109828 | Dera_j1     | mmu-miR-544-3p  | -0.257 |
| TCONS_00109883 | Tspan12_j3  | mmu-miR-544-3p  | -0.255 |
| TCONS_00109895 | Grm8_j2     | rno-let-7f-1*   | -0.087 |

|                |                  |                 |        |
|----------------|------------------|-----------------|--------|
| TCONS_00109895 | Grm8_j2          | mmu-let-7a-1-3p | -0.076 |
| TCONS_00109896 | Zfp800_j2        | mmu-miR-467b-5p | -0.138 |
| TCONS_00109896 | Zfp800_j2        | mmu-miR-298-5p  | -0.124 |
| TCONS_00109896 | Zfp800_j2        | mmu-miR-19b-3p  | -0.13  |
| TCONS_00109965 | Gimap3_j1        | mmu-miR-9-3p    | -0.04  |
| TCONS_00110079 | Ccdc37_j6        | mmu-miR-19b-3p  | -0.034 |
| TCONS_00110079 | Ccdc37_j6        | mmu-miR-466d-5p | -3.86  |
| TCONS_00110079 | Ccdc37_j6        | mmu-miR-299-3p  | -0.152 |
| TCONS_00110079 | Ccdc37_j6        | mmu-miR-298-5p  | -0.105 |
| TCONS_00110079 | Ccdc37_j6        | mmu-miR-29b-3p  | -0.146 |
| TCONS_00110113 | Srgap3_j5        | mmu-miR-298-5p  | -0.005 |
| TCONS_00110113 | Srgap3_j5        | mmu-miR-29b-3p  | -0.127 |
| TCONS_00110113 | Srgap3_j5        | mmu-miR-544-3p  | -0.018 |
| TCONS_00110113 | Srgap3_j5        | mmu-miR-466d-5p | -0.025 |
| TCONS_00110113 | Srgap3_j5        | mmu-miR-299-3p  | -0.065 |
| TCONS_00110143 | Zfp422           | mmu-miR-467b-5p | -0.21  |
| TCONS_00110143 | Zfp422           | mmu-miR-154-3p  | -0.07  |
| TCONS_00110143 | Zfp422           | mmu-miR-544-3p  | -0.101 |
| TCONS_00110175 | Rimklb_j5        | mmu-miR-544-3p  | -0.204 |
| TCONS_00110225 | Clec1a_j1        | mmu-miR-466d-5p | -0.027 |
| TCONS_00110225 | Clec1a_j1        | mmu-miR-299-3p  | -0.115 |
| TCONS_00110623 | A430107O13Rik_j5 | mmu-miR-544-3p  | -0.219 |
| TCONS_00110770 | Dqx1_j6          | mmu-miR-544-3p  | -0.046 |
| TCONS_00110770 | Dqx1_j6          | mmu-miR-298-5p  | -0.025 |
| TCONS_00110770 | Dqx1_j6          | rno-let-7f-1*   | -0.005 |
| TCONS_00110770 | Dqx1_j6          | mmu-miR-2137    | -0.18  |
| TCONS_00110770 | Dqx1_j6          | mmu-let-7a-1-3p | -0.005 |
| TCONS_00110828 | XLOC_027806      | mmu-miR-466d-5p | -3.03  |
| TCONS_00110877 | Slc6a1_j3        | mmu-miR-466d-5p | -0.175 |
| TCONS_00110877 | Slc6a1_j3        | mmu-miR-298-5p  | -0.019 |
| TCONS_00110901 | Rad52_j10        | mmu-miR-466d-5p | -0.388 |
| TCONS_00110940 | Tnfrsf1a_j1      | mmu-miR-29b-3p  | -0.378 |
| TCONS_00110989 | Plekha5_j6       | mmu-miR-298-5p  | -0.13  |
| TCONS_00110989 | Plekha5_j6       | mmu-miR-466d-5p | -0.024 |
| TCONS_00110989 | Plekha5_j6       | mmu-miR-29b-3p  | -0.027 |
| TCONS_00111066 | Dgki_j6          | mmu-miR-298-5p  | -0.039 |
| TCONS_00111066 | Dgki_j6          | mmu-miR-466d-5p | -0.008 |
| TCONS_00111066 | Dgki_j6          | mmu-miR-299-3p  | -0.067 |
| TCONS_00111121 | Hpgds            | mmu-miR-19b-3p  | -0.146 |
| TCONS_00111121 | Hpgds            | mmu-miR-9-3p    | -0.22  |
| TCONS_00111121 | Hpgds            | mmu-miR-298-5p  | -0.124 |
| TCONS_00111121 | Hpgds            | mmu-miR-544-3p  | -0.095 |
| TCONS_00111121 | Hpgds            | mmu-miR-467b-5p | -0.394 |
| TCONS_00111121 | Hpgds            | mmu-miR-299-3p  | -0.123 |
| TCONS_00111121 | Hpgds            | mmu-let-7a-1-3p | -0.002 |
| TCONS_00111229 | Zfp9_j1          | mmu-miR-467b-5p | -0.005 |
| TCONS_00111229 | Zfp9_j1          | mmu-miR-466d-5p | -0.104 |

|                |            |                 |           |
|----------------|------------|-----------------|-----------|
| TCONS_00111229 | Zfp9_j1    | mmu-miR-544-3p  | -0.371    |
| TCONS_00111317 | Slco1a4_j4 | mmu-miR-467b-5p | -0.322    |
| TCONS_00111317 | Slco1a4_j4 | mmu-miR-29b-3p  | -0.179    |
| TCONS_00111317 | Slco1a4_j4 | mmu-miR-299-3p  | -0.424    |
| TCONS_00111317 | Slco1a4_j4 | mmu-miR-544-3p  | -0.342    |
| TCONS_00111651 | Ttc26_j2   | mmu-miR-9-3p    | -0.07     |
| TCONS_00111651 | Ttc26_j2   | mmu-miR-298-5p  | -0.103    |
| TCONS_00111809 | Fgd5_j2    | mmu-miR-19b-3p  | -0.069    |
| TCONS_00111819 | Ppp4r2_j3  | mmu-miR-9-3p    | -0.113    |
| TCONS_00111819 | Ppp4r2_j3  | mmu-miR-29b-3p  | -0.1      |
| TCONS_00111819 | Ppp4r2_j3  | mmu-miR-467b-5p | -0.094    |
| TCONS_00112004 | Grm8_j3    | mmu-let-7a-1-3p | -0.076    |
| TCONS_00112004 | Grm8_j3    | rno-let-7f-1*   | -0.087    |
| TCONS_00112013 | Gm2058_j3  | mmu-miR-29b-3p  | -0.006    |
| TCONS_00112013 | Gm2058_j3  | rno-let-7f-1*   | -0.081    |
| TCONS_00112013 | Gm2058_j3  | mmu-miR-298-5p  | -0.131    |
| TCONS_00112013 | Gm2058_j3  | mmu-let-7a-1-3p | -0.074    |
| TCONS_00112013 | Gm2058_j3  | mmu-miR-299-3p  | -0.247    |
| TCONS_00112043 | Tpk1_j3    | mmu-miR-29b-3p  | -0.447    |
| TCONS_00112043 | Tpk1_j3    | mmu-miR-299-3p  | -0.111    |
| TCONS_00112043 | Tpk1_j3    | mmu-miR-544-3p  | -0.273    |
| TCONS_00112133 | Adamts9_j3 | mmu-miR-467b-5p | -0.029    |
| TCONS_00112133 | Adamts9_j3 | mmu-miR-19b-3p  | -0.092    |
| TCONS_00112133 | Adamts9_j3 | mmu-miR-29b-3p  | -0.383    |
| TCONS_00112133 | Adamts9_j3 | mmu-miR-466d-5p | -6.94E-18 |
| TCONS_00112133 | Adamts9_j3 | mmu-miR-299-3p  | -0.09     |
| TCONS_00112202 | Leprel2_j3 | mmu-miR-466d-5p | -0.138    |
| TCONS_00112204 | Leprel2_j2 | mmu-miR-2137    | -0.283    |
| TCONS_00112204 | Leprel2_j2 | mmu-miR-466d-5p | -0.127    |
| TCONS_00112514 | Glcci1_j1  | mmu-miR-298-5p  | -0.149    |
| TCONS_00112514 | Glcci1_j1  | mmu-miR-9-3p    | -0.196    |
| TCONS_00112514 | Glcci1_j1  | mmu-miR-544-3p  | -0.281    |
| TCONS_00112605 | Krba1      | mmu-miR-466d-5p | -0.056    |
| TCONS_00112605 | Krba1      | mmu-miR-299-3p  | -0.381    |
| TCONS_00112605 | Krba1      | mmu-miR-298-5p  | -0.134    |
| TCONS_00112666 | Lox3_j3    | mmu-miR-299-3p  | -0.109    |
| TCONS_00112666 | Lox3_j3    | mmu-miR-466d-5p | -0.042    |
| TCONS_00112666 | Lox3_j3    | mmu-miR-2137    | -0.228    |
| TCONS_00112666 | Lox3_j3    | mmu-miR-29b-3p  | -0.011    |
| TCONS_00112666 | Lox3_j3    | mmu-miR-298-5p  | -0.083    |
| TCONS_00113015 | Nup210_j2  | mmu-miR-298-5p  | -0.099    |
| TCONS_00113015 | Nup210_j2  | mmu-miR-29b-3p  | -0.308    |
| TCONS_00113046 | Srgap3     | mmu-miR-298-5p  | -0.005    |
| TCONS_00113046 | Srgap3     | mmu-miR-299-3p  | -0.065    |
| TCONS_00113046 | Srgap3     | mmu-miR-466d-5p | -0.068    |
| TCONS_00113046 | Srgap3     | mmu-miR-544-3p  | -0.018    |
| TCONS_00113157 | Kcnj8      | mmu-miR-466d-5p | -0.119    |

|                |             |                 |        |
|----------------|-------------|-----------------|--------|
| TCONS_00113619 | Eml2_j6     | mmu-miR-299-3p  | -0.223 |
| TCONS_00113863 | Vstm2b_j1   | mmu-miR-19b-3p  | -0.173 |
| TCONS_00113864 | Vstm2b_j4   | mmu-miR-19b-3p  | -0.173 |
| TCONS_00113943 | Hsd17b14_j1 | mmu-miR-467b-5p | -0.036 |
| TCONS_00114027 | Ube3a_j5    | mmu-let-7a-1-3p | -0.064 |
| TCONS_00114027 | Ube3a_j5    | mmu-miR-154-3p  | -0.196 |
| TCONS_00114027 | Ube3a_j5    | rno-let-7f-1*   | -0.083 |
| TCONS_00114177 | Rab30_j2    | mmu-miR-29b-3p  | -0.377 |
| TCONS_00114177 | Rab30_j2    | mmu-miR-467b-5p | -0.054 |
| TCONS_00114177 | Rab30_j2    | mmu-miR-466d-5p | -0.142 |
| TCONS_00114177 | Rab30_j2    | rno-let-7f-1*   | -0.089 |
| TCONS_00114177 | Rab30_j2    | mmu-let-7a-1-3p | -0.061 |
| TCONS_00114177 | Rab30_j2    | mmu-miR-299-3p  | -0.005 |
| TCONS_00114278 | Cckbr       | mmu-miR-466d-5p | -0.065 |
| TCONS_00114322 | Mical2_j1   | mmu-miR-466d-5p | -0.519 |
| TCONS_00114322 | Mical2_j1   | mmu-miR-154-3p  | -0.112 |
| TCONS_00114331 | Arntl_j2    | rno-let-7f-1*   | -0.151 |
| TCONS_00114331 | Arntl_j2    | mmu-let-7a-1-3p | -0.132 |
| TCONS_00114367 | Tmem159     | mmu-miR-19b-3p  | -0.251 |
| TCONS_00114395 | Prkcb_j1    | mmu-miR-298-5p  | -0.115 |
| TCONS_00114395 | Prkcb_j1    | mmu-miR-299-3p  | -0.127 |
| TCONS_00114395 | Prkcb_j1    | mmu-miR-29b-3p  | -0.119 |
| TCONS_00114431 | Gdpd3_j3    | mmu-miR-544-3p  | -0.019 |
| TCONS_00114582 | Gpr123_j2   | mmu-miR-544-3p  | -0.081 |
| TCONS_00114582 | Gpr123_j2   | mmu-miR-466d-5p | -2.41  |
| TCONS_00114582 | Gpr123_j2   | mmu-miR-298-5p  | -0.048 |
| TCONS_00114582 | Gpr123_j2   | mmu-let-7a-1-3p | -0.081 |
| TCONS_00114582 | Gpr123_j2   | mmu-miR-299-3p  | -0.11  |
| TCONS_00114582 | Gpr123_j2   | rno-let-7f-1*   | -0.07  |
| TCONS_00114584 | Gpr123_j1   | mmu-miR-466d-5p | -2.41  |
| TCONS_00114584 | Gpr123_j1   | mmu-miR-298-5p  | -0.048 |
| TCONS_00114584 | Gpr123_j1   | mmu-let-7a-1-3p | -0.081 |
| TCONS_00114584 | Gpr123_j1   | mmu-miR-299-3p  | -0.11  |
| TCONS_00114584 | Gpr123_j1   | rno-let-7f-1*   | -0.07  |
| TCONS_00114584 | Gpr123_j1   | mmu-miR-544-3p  | -0.081 |
| TCONS_00114593 | Mtg1        | mmu-miR-467b-5p | -0.156 |
| TCONS_00114593 | Mtg1        | mmu-miR-298-5p  | -0.052 |
| TCONS_00114594 | Mtg1_j4     | mmu-miR-544-3p  | -0.101 |
| TCONS_00114615 | Eps8l2_j5   | mmu-miR-298-5p  | -0.288 |
| TCONS_00114615 | Eps8l2_j5   | mmu-miR-544-3p  | -0.009 |
| TCONS_00114621 | Pnpla2_j1   | mmu-miR-2137    | -0.553 |
| TCONS_00114621 | Pnpla2_j1   | mmu-miR-299-3p  | -0.128 |
| TCONS_00114646 | Dhcr7_j6    | mmu-miR-9-3p    | -0.008 |
| TCONS_00114655 | Mrgprf      | mmu-miR-29b-3p  | -0.135 |
| TCONS_00114655 | Mrgprf      | mmu-miR-298-5p  | -0.198 |
| TCONS_00114738 | Zscan18_j5  | mmu-miR-19b-3p  | -0.094 |
| TCONS_00114835 | Zfp109_j1   | mmu-miR-544-3p  | -0.074 |

|                |             |                 |        |
|----------------|-------------|-----------------|--------|
| TCONS_00114835 | Zfp109_j1   | mmu-miR-154-3p  | -0.077 |
| TCONS_00114835 | Zfp109_j1   | mmu-let-7a-1-3p | -0.006 |
| TCONS_00114875 | Cyp2s1      | mmu-miR-466d-5p | -0.169 |
| TCONS_00114875 | Cyp2s1      | mmu-miR-298-5p  | -0.11  |
| TCONS_00114880 | Itpkc       | mmu-miR-466d-5p | -0.153 |
| TCONS_00114880 | Itpkc       | mmu-miR-29b-3p  | -0.471 |
| TCONS_00115006 | Scn1b       | mmu-miR-19b-3p  | -0.287 |
| TCONS_00115243 | Lrrk1       | mmu-miR-299-3p  | -0.172 |
| TCONS_00115243 | Lrrk1       | mmu-miR-19b-3p  | -0.216 |
| TCONS_00115243 | Lrrk1       | mmu-miR-466d-5p | -0.395 |
| TCONS_00115244 | Aldh1a3     | mmu-miR-9-3p    | -0.101 |
| TCONS_00115244 | Aldh1a3     | mmu-miR-544-3p  | -0.051 |
| TCONS_00115304 | Hapln3_j1   | mmu-miR-298-5p  | -0.035 |
| TCONS_00115304 | Hapln3_j1   | mmu-miR-466d-5p | -0.888 |
| TCONS_00115304 | Hapln3_j1   | mmu-miR-29b-3p  | -0.081 |
| TCONS_00115335 | Blm         | rno-let-7f-1*   | -0.026 |
| TCONS_00115335 | Blm         | mmu-let-7a-1-3p | -0.017 |
| TCONS_00115335 | Blm         | mmu-miR-29b-3p  | -0.488 |
| TCONS_00115335 | Blm         | mmu-miR-466d-5p | -0.285 |
| TCONS_00115335 | Blm         | mmu-miR-298-5p  | -0.164 |
| TCONS_00115436 | Slco2b1     | mmu-miR-298-5p  | -0.059 |
| TCONS_00115535 | Tmem41b_j3  | mmu-miR-544-3p  | -0.108 |
| TCONS_00115535 | Tmem41b_j3  | mmu-miR-298-5p  | -0.106 |
| TCONS_00115577 | Plekha7_j10 | mmu-miR-154-3p  | -0.166 |
| TCONS_00115577 | Plekha7_j10 | mmu-miR-29b-3p  | -0.106 |
| TCONS_00115577 | Plekha7_j10 | mmu-miR-19b-3p  | -0.046 |
| TCONS_00115577 | Plekha7_j10 | mmu-miR-298-5p  | -0.072 |
| TCONS_00115577 | Plekha7_j10 | mmu-miR-9-3p    | -0.043 |
| TCONS_00115580 | Pik3c2a_j2  | mmu-miR-154-3p  | -0.023 |
| TCONS_00115580 | Pik3c2a_j2  | mmu-miR-544-3p  | -0.167 |
| TCONS_00115580 | Pik3c2a_j2  | rno-let-7f-1*   | -0.322 |
| TCONS_00115580 | Pik3c2a_j2  | mmu-miR-466d-5p | -0.347 |
| TCONS_00115580 | Pik3c2a_j2  | mmu-let-7a-1-3p | -0.299 |
| TCONS_00115580 | Pik3c2a_j2  | mmu-miR-9-3p    | -0.074 |
| TCONS_00115766 | Adam8_j2    | mmu-miR-299-3p  | -0.262 |
| TCONS_00115766 | Adam8_j2    | mmu-miR-9-3p    | -0.047 |
| TCONS_00115769 | Tubgcp2_j2  | mmu-miR-544-3p  | -0.244 |
| TCONS_00115769 | Tubgcp2_j2  | mmu-miR-29b-3p  | -0.123 |
| TCONS_00115769 | Tubgcp2_j2  | mmu-miR-298-5p  | -0.033 |
| TCONS_00115823 | Igf2        | mmu-miR-299-3p  | -0.424 |
| TCONS_00115823 | Igf2        | mmu-miR-466d-5p | -2.29  |
| TCONS_00116485 | Zfp444      | mmu-miR-298-5p  | -0.011 |
| TCONS_00116485 | Zfp444      | mmu-miR-29b-3p  | -0.198 |
| TCONS_00116485 | Zfp444      | mmu-let-7a-1-3p | -0.005 |
| TCONS_00116485 | Zfp444      | mmu-miR-466d-5p | -0.165 |
| TCONS_00116485 | Zfp444      | mmu-miR-9-3p    | -0.022 |
| TCONS_00116714 | Vstm2b_j2   | mmu-let-7a-1-3p | -0.074 |

|                |             |                 |        |
|----------------|-------------|-----------------|--------|
| TCONS_00116714 | Vstm2b_j2   | mmu-miR-19b-3p  | -0.155 |
| TCONS_00116714 | Vstm2b_j2   | rno-let-7f-1*   | -0.074 |
| TCONS_00116714 | Vstm2b_j2   | mmu-miR-466d-5p | -0.113 |
| TCONS_00116714 | Vstm2b_j2   | mmu-miR-299-3p  | -0.015 |
| TCONS_00116852 | Lysmd4      | mmu-miR-29b-3p  | -0.55  |
| TCONS_00116852 | Lysmd4      | mmu-miR-544-3p  | -0.086 |
| TCONS_00116852 | Lysmd4      | mmu-miR-19b-3p  | -0.052 |
| TCONS_00116949 | Pak1_j1     | mmu-miR-466d-5p | -0.079 |
| TCONS_00117168 | Lhpp_j3     | mmu-miR-298-5p  | -0.107 |
| TCONS_00117168 | Lhpp_j3     | mmu-miR-299-3p  | -0.365 |
| TCONS_00117186 | XLOC_030069 | mmu-miR-19b-3p  | -0.078 |
| TCONS_00117186 | XLOC_030069 | mmu-miR-466d-5p | -0.133 |
| TCONS_00117299 | Zscan18_j1  | mmu-miR-19b-3p  | -0.094 |
| TCONS_00117420 | Sipa1l3_j1  | mmu-miR-466d-5p | -0.119 |
| TCONS_00117420 | Sipa1l3_j1  | mmu-miR-298-5p  | -0.065 |
| TCONS_00117724 | Il16_j3     | mmu-miR-467b-5p | -0.024 |
| TCONS_00117724 | Il16_j3     | mmu-miR-299-3p  | -0.075 |
| TCONS_00117724 | Il16_j3     | mmu-miR-19b-3p  | -0.062 |
| TCONS_00117724 | Il16_j3     | mmu-miR-298-5p  | -0.249 |
| TCONS_00118018 | Adam8_j5    | mmu-miR-298-5p  | -0.18  |
| TCONS_00118018 | Adam8_j5    | mmu-miR-19b-3p  | -0.032 |
| TCONS_00118019 | Adam8       | mmu-miR-29b-3p  | -0.049 |
| TCONS_00118019 | Adam8       | mmu-miR-298-5p  | -0.071 |
| TCONS_00118073 | Ccnd1_j1    | mmu-miR-466d-5p | -0.014 |
| TCONS_00118073 | Ccnd1_j1    | mmu-miR-544-3p  | -0.055 |
| TCONS_00118073 | Ccnd1_j1    | mmu-miR-298-5p  | -0.007 |
| TCONS_00118073 | Ccnd1_j1    | mmu-miR-299-3p  | -0.02  |
| TCONS_00118073 | Ccnd1_j1    | mmu-miR-29b-3p  | -0.135 |
| TCONS_00118073 | Ccnd1_j1    | mmu-miR-9-3p    | -0.071 |
| TCONS_00118632 | Ercc2_j1    | mmu-miR-298-5p  | -0.381 |
| TCONS_00118673 | Megf8_j7    | mmu-miR-299-3p  | -0.141 |
| TCONS_00118673 | Megf8_j7    | mmu-miR-298-5p  | -0.057 |
| TCONS_00118748 | XLOC_029660 | mmu-miR-9-3p    | -0.04  |
| TCONS_00118748 | XLOC_029660 | mmu-miR-544-3p  | -0.104 |
| TCONS_00118757 | Etfb_j3     | mmu-miR-298-5p  | -0.161 |
| TCONS_00118768 | Shank1_j2   | mmu-miR-298-5p  | -0.19  |
| TCONS_00118768 | Shank1_j2   | mmu-miR-29b-3p  | -0.178 |
| TCONS_00118768 | Shank1_j2   | mmu-miR-2137    | -0.286 |
| TCONS_00118768 | Shank1_j2   | mmu-miR-19b-3p  | -0.112 |
| TCONS_00118783 | Kcnc3_j1    | mmu-miR-299-3p  | -0.174 |
| TCONS_00118848 | Adamts17_j3 | mmu-let-7a-1-3p | -0.038 |
| TCONS_00118882 | Pde8a_j2    | mmu-miR-466d-5p | -0.099 |
| TCONS_00118891 | Mex3b_j2    | mmu-let-7a-1-3p | -0.187 |
| TCONS_00118891 | Mex3b_j2    | rno-let-7f-1*   | -0.193 |
| TCONS_00118891 | Mex3b_j2    | mmu-miR-298-5p  | -0.114 |
| TCONS_00118891 | Mex3b_j2    | mmu-miR-154-3p  | -0.083 |
| TCONS_00118891 | Mex3b_j2    | mmu-miR-29b-3p  | -0.517 |



|                |               |                 |        |
|----------------|---------------|-----------------|--------|
| TCONS_00118891 | Mex3b_j2      | mmu-miR-9-3p    | -0.041 |
| TCONS_00119075 | Plekha1_j3    | mmu-miR-467b-5p | -0.057 |
| TCONS_00119075 | Plekha1_j3    | mmu-miR-544-3p  | -0.066 |
| TCONS_00119075 | Plekha1_j3    | mmu-miR-298-5p  | -0.172 |
| TCONS_00119180 | Zfp329_j3     | mmu-miR-9-3p    | -0.073 |
| TCONS_00119180 | Zfp329_j3     | mmu-miR-154-3p  | -0.083 |
| TCONS_00119180 | Zfp329_j3     | mmu-miR-466d-5p | -0.386 |
| TCONS_00119243 | Spnb4_j4      | mmu-miR-298-5p  | -0.074 |
| TCONS_00119243 | Spnb4_j4      | mmu-miR-2137    | -0.264 |
| TCONS_00119243 | Spnb4_j4      | mmu-miR-29b-3p  | -0.066 |
| TCONS_00119256 | Actn4_j2      | mmu-miR-298-5p  | -0.085 |
| TCONS_00119343 | C330019L16Rik | mmu-miR-466d-5p | -0.113 |
| TCONS_00119343 | C330019L16Rik | mmu-miR-29b-3p  | -0.183 |
| TCONS_00119343 | C330019L16Rik | mmu-miR-154-3p  | -0.06  |
| TCONS_00119343 | C330019L16Rik | mmu-miR-544-3p  | -0.296 |
| TCONS_00119343 | C330019L16Rik | mmu-miR-19b-3p  | -0.502 |
| TCONS_00119409 | XLOC_030435   | mmu-miR-299-3p  | -0.051 |
| TCONS_00119409 | XLOC_030435   | mmu-miR-466d-5p | -0.169 |
| TCONS_00119409 | XLOC_030435   | mmu-miR-19b-3p  | -0.008 |
| TCONS_00119683 | Prss53_j4     | mmu-miR-466d-5p | -6.52  |
| TCONS_00119683 | Prss53_j4     | mmu-miR-29b-3p  | -0.009 |
| TCONS_00119683 | Prss53_j4     | mmu-miR-544-3p  | -0.137 |
| TCONS_00119692 | Fgfr2_j2      | mmu-miR-466d-5p | -0.176 |
| TCONS_00119692 | Fgfr2_j2      | rno-let-7f-1*   | -0.091 |
| TCONS_00119692 | Fgfr2_j2      | mmu-let-7a-1-3p | -0.094 |
| TCONS_00119710 | D7Ert443e_j1  | mmu-miR-298-5p  | -0.169 |
| TCONS_00119726 | Adam8_j9      | mmu-miR-9-3p    | -0.1   |
| TCONS_00119726 | Adam8_j9      | mmu-miR-299-3p  | -0.138 |
| TCONS_00119734 | Hras1_j2      | mmu-miR-544-3p  | -0.079 |
| TCONS_00119734 | Hras1_j2      | mmu-miR-29b-3p  | -0.22  |
| TCONS_00120194 | Zfp444_j1     | mmu-let-7a-1-3p | -0.028 |
| TCONS_00120194 | Zfp444_j1     | mmu-miR-466d-5p | -0.206 |
| TCONS_00120194 | Zfp444_j1     | rno-let-7f-1*   | -0.009 |
| TCONS_00120194 | Zfp444_j1     | mmu-miR-9-3p    | -0.04  |
| TCONS_00120194 | Zfp444_j1     | mmu-miR-29b-3p  | -0.053 |
| TCONS_00120194 | Zfp444_j1     | mmu-miR-298-5p  | -0.026 |
| TCONS_00120194 | Zfp444_j1     | mmu-miR-19b-3p  | -0.017 |
| TCONS_00120204 | Zfp446_j3     | mmu-miR-466d-5p | -3.38  |
| TCONS_00120204 | Zfp446_j3     | mmu-miR-298-5p  | -0.146 |
| TCONS_00120403 | Nav2_j1       | mmu-miR-29b-3p  | -0.428 |
| TCONS_00120403 | Nav2_j1       | mmu-miR-299-3p  | -0.05  |
| TCONS_00120407 | Nav2_j12      | mmu-miR-29b-3p  | -0.428 |
| TCONS_00120407 | Nav2_j12      | mmu-miR-299-3p  | -0.05  |
| TCONS_00120660 | Itgam_j5      | mmu-miR-466d-5p | -3.1   |
| TCONS_00120660 | Itgam_j5      | mmu-miR-9-3p    | -0.053 |
| TCONS_00120730 | Kcnq1_j3      | mmu-miR-29b-3p  | -0.099 |
| TCONS_00120730 | Kcnq1_j3      | mmu-miR-19b-3p  | -0.211 |

|                |             |                 |        |
|----------------|-------------|-----------------|--------|
| TCONS_00120730 | Kcnq1_j3    | mmu-miR-299-3p  | -0.02  |
| TCONS_00120828 | Zfp94_j4    | mmu-miR-466d-5p | -0.144 |
| TCONS_00120828 | Zfp94_j4    | rno-let-7f-1*   | -0.029 |
| TCONS_00120828 | Zfp94_j4    | mmu-let-7a-1-3p | -0.048 |
| TCONS_00120834 | Erf_j2      | mmu-miR-299-3p  | -0.221 |
| TCONS_00120834 | Erf_j2      | rno-let-7f-1*   | -0.175 |
| TCONS_00120834 | Erf_j2      | mmu-let-7a-1-3p | -0.186 |
| TCONS_00120868 | XLOC_030290 | mmu-let-7a-1-3p | -0.4   |
| TCONS_00120868 | XLOC_030290 | mmu-miR-466d-5p | -0.084 |
| TCONS_00120868 | XLOC_030290 | rno-let-7f-1*   | -0.409 |
| TCONS_00120868 | XLOC_030290 | mmu-miR-544-3p  | -0.086 |
| TCONS_00120868 | XLOC_030290 | mmu-miR-467b-5p | -0.033 |
| TCONS_00120933 | AW146154    | mmu-miR-298-5p  | -0.067 |
| TCONS_00120933 | AW146154    | mmu-miR-19b-3p  | -0.302 |
| TCONS_00120971 | Rpl13a_j4   | mmu-miR-544-3p  | -0.116 |
| TCONS_00120973 | Flt3l_j2    | mmu-miR-298-5p  | -0.035 |
| TCONS_00120973 | Flt3l_j2    | mmu-miR-29b-3p  | -0.441 |
| TCONS_00120973 | Flt3l_j2    | mmu-miR-466d-5p | -0.066 |
| TCONS_00121147 | Trim68_j6   | rno-let-7f-1*   | -0.056 |
| TCONS_00121147 | Trim68_j6   | mmu-let-7a-1-3p | -0.06  |
| TCONS_00121147 | Trim68_j6   | mmu-miR-544-3p  | -0.144 |
| TCONS_00121187 | Rras2_j1    | mmu-miR-19b-3p  | -0.103 |
| TCONS_00121187 | Rras2_j1    | mmu-miR-29b-3p  | -0.191 |
| TCONS_00121187 | Rras2_j1    | mmu-miR-466d-5p | -0.482 |
| TCONS_00121208 | lgsf6_j1    | mmu-miR-298-5p  | -0.113 |
| TCONS_00121208 | lgsf6_j1    | mmu-miR-544-3p  | -0.21  |
| TCONS_00121208 | lgsf6_j1    | mmu-miR-467b-5p | -0.085 |
| TCONS_00121208 | lgsf6_j1    | mmu-miR-29b-3p  | -0.097 |
| TCONS_00121303 | Lrdd_j7     | mmu-miR-9-3p    | -0.22  |
| TCONS_00121303 | Lrdd_j7     | mmu-miR-544-3p  | -0.185 |
| TCONS_00121304 | Lrdd_j2     | mmu-miR-9-3p    | -0.313 |
| TCONS_00121669 | Olfr1344_j3 | mmu-miR-466d-5p | -0.031 |
| TCONS_00121669 | Olfr1344_j3 | mmu-miR-299-3p  | -0.049 |
| TCONS_00121669 | Olfr1344_j3 | mmu-miR-298-5p  | -0.121 |
| TCONS_00121669 | Olfr1344_j3 | mmu-miR-19b-3p  | -0.062 |
| TCONS_00121669 | Olfr1344_j3 | mmu-let-7a-1-3p | -0.156 |
| TCONS_00121669 | Olfr1344_j3 | mmu-miR-29b-3p  | -0.346 |
| TCONS_00121669 | Olfr1344_j3 | rno-let-7f-1*   | -0.167 |
| TCONS_00121798 | Vstm2b_j3   | mmu-miR-19b-3p  | -0.177 |
| TCONS_00121821 | Kcnc3_j5    | mmu-miR-299-3p  | -0.325 |
| TCONS_00121821 | Kcnc3_j5    | mmu-miR-29b-3p  | -0.294 |
| TCONS_00121821 | Kcnc3_j5    | mmu-miR-466d-5p | -0.04  |
| TCONS_00121853 | Tmem86a_j2  | mmu-miR-29b-3p  | -0.162 |
| TCONS_00122031 | Gdgd3_j1    | mmu-miR-544-3p  | -0.007 |
| TCONS_00122068 | Itgam       | mmu-miR-9-3p    | -0.057 |
| TCONS_00122068 | Itgam       | mmu-miR-466d-5p | -3.19  |
| TCONS_00122180 | Ehd2_j2     | mmu-miR-466d-5p | -0.054 |

|                |                  |                 |        |
|----------------|------------------|-----------------|--------|
| TCONS_00122180 | Ehd2_j2          | mmu-miR-29b-3p  | -0.067 |
| TCONS_00122180 | Ehd2_j2          | mmu-miR-299-3p  | -0.034 |
| TCONS_00122180 | Ehd2_j2          | mmu-miR-467b-5p | -0.304 |
| TCONS_00122490 | Olfr78           | mmu-miR-9-3p    | -0.022 |
| TCONS_00122490 | Olfr78           | mmu-miR-298-5p  | -0.197 |
| TCONS_00122546 | Pik3c2a_j6       | mmu-let-7a-1-3p | -0.236 |
| TCONS_00122546 | Pik3c2a_j6       | mmu-miR-9-3p    | -0.106 |
| TCONS_00122546 | Pik3c2a_j6       | mmu-miR-466d-5p | -0.206 |
| TCONS_00122546 | Pik3c2a_j6       | rno-let-7f-1*   | -0.278 |
| TCONS_00122546 | Pik3c2a_j6       | mmu-miR-544-3p  | -0.202 |
| TCONS_00122546 | Pik3c2a_j6       | mmu-miR-154-3p  | -0.055 |
| TCONS_00122592 | Zfp668_j5        | mmu-miR-544-3p  | -0.138 |
| TCONS_00122592 | Zfp668_j5        | mmu-miR-466d-5p | -6.52  |
| TCONS_00122592 | Zfp668_j5        | mmu-miR-29b-3p  | -0.009 |
| TCONS_00122640 | B230206H07Rik_j5 | mmu-miR-298-5p  | -0.029 |
| TCONS_00122640 | B230206H07Rik_j5 | mmu-miR-29b-3p  | -0.009 |
| TCONS_00123221 | Nav2_j7          | mmu-miR-299-3p  | -0.05  |
| TCONS_00123221 | Nav2_j7          | mmu-miR-29b-3p  | -0.428 |
| TCONS_00123235 | Atp10a_j3        | mmu-miR-466d-5p | -0.067 |
| TCONS_00123235 | Atp10a_j3        | mmu-miR-19b-3p  | -0.26  |
| TCONS_00123256 | Fam169b_j3       | mmu-miR-466d-5p | -3.19  |
| TCONS_00123284 | Sh3gl3_j1        | mmu-miR-467b-5p | -0.063 |
| TCONS_00123284 | Sh3gl3_j1        | mmu-let-7a-1-3p | -0.225 |
| TCONS_00123284 | Sh3gl3_j1        | rno-let-7f-1*   | -0.257 |
| TCONS_00123298 | Ctsc_j1          | mmu-let-7a-1-3p | -0.004 |
| TCONS_00123298 | Ctsc_j1          | rno-let-7f-1*   | -0.011 |
| TCONS_00123298 | Ctsc_j1          | mmu-miR-466d-5p | -0.078 |
| TCONS_00123429 | XLOC_030012      | mmu-miR-466d-5p | -4.53  |
| TCONS_00123488 | Jakmip3_j8       | mmu-miR-544-3p  | -0.11  |
| TCONS_00123494 | Paox_j8          | mmu-miR-298-5p  | -0.096 |
| TCONS_00123494 | Paox_j8          | mmu-miR-19b-3p  | -0.088 |
| TCONS_00123497 | B4galnt4_j9      | mmu-miR-29b-3p  | -0.114 |
| TCONS_00123559 | Zscan18_j2       | mmu-miR-19b-3p  | -0.094 |
| TCONS_00123591 | Clasrp_j1        | mmu-miR-544-3p  | -0.2   |
| TCONS_00123621 | Spnb4_j2         | mmu-miR-298-5p  | -0.094 |
| TCONS_00123621 | Spnb4_j2         | mmu-miR-29b-3p  | -0.073 |
| TCONS_00123700 | 4931406B18Rik_j1 | mmu-miR-298-5p  | -0.353 |
| TCONS_00123700 | 4931406B18Rik_j1 | mmu-miR-544-3p  | -0.146 |
| TCONS_00123876 | Tpp1_j1          | mmu-miR-298-5p  | -0.311 |
| TCONS_00123876 | Tpp1_j1          | mmu-miR-466d-5p | -0.839 |
| TCONS_00123876 | Tpp1_j1          | mmu-miR-19b-3p  | -0.13  |
| TCONS_00123876 | Tpp1_j1          | mmu-miR-9-3p    | -0.055 |
| TCONS_00123876 | Tpp1_j1          | mmu-miR-154-3p  | -0.029 |
| TCONS_00123876 | Tpp1_j1          | mmu-miR-29b-3p  | -0.178 |
| TCONS_00123909 | Syt17_j1         | mmu-miR-298-5p  | -0.177 |
| TCONS_00123909 | Syt17_j1         | mmu-miR-154-3p  | -0.019 |
| TCONS_00123909 | Syt17_j1         | mmu-miR-299-3p  | -0.273 |

|                |           |                 |        |
|----------------|-----------|-----------------|--------|
| TCONS_00124419 | Mcph1     | mmu-miR-466d-5p | -0.156 |
| TCONS_00124419 | Mcph1     | mmu-miR-19b-3p  | -0.039 |
| TCONS_00124419 | Mcph1     | mmu-miR-467b-5p | -0.085 |
| TCONS_00124419 | Mcph1     | mmu-miR-298-5p  | -0.298 |
| TCONS_00124507 | Rnf122    | mmu-miR-466d-5p | -0.527 |
| TCONS_00124507 | Rnf122    | mmu-miR-29b-3p  | -0.214 |
| TCONS_00124507 | Rnf122    | mmu-miR-467b-5p | -0.056 |
| TCONS_00124508 | Rnf122    | mmu-miR-29b-3p  | -0.214 |
| TCONS_00124508 | Rnf122    | mmu-miR-467b-5p | -0.056 |
| TCONS_00124508 | Rnf122    | mmu-miR-466d-5p | -0.527 |
| TCONS_00124514 | Fut10     | mmu-miR-298-5p  | -0.189 |
| TCONS_00124628 | Sh3rf1_j1 | mmu-let-7a-1-3p | -0.033 |
| TCONS_00124628 | Sh3rf1_j1 | rno-let-7f-1*   | -0.033 |
| TCONS_00124699 | Lrrc25    | mmu-miR-298-5p  | -0.286 |
| TCONS_00124755 | Zfp961_j1 | mmu-miR-299-3p  | -0.111 |
| TCONS_00124893 | Nod2_j5   | mmu-miR-29b-3p  | -0.362 |
| TCONS_00124893 | Nod2_j5   | mmu-miR-299-3p  | -0.04  |
| TCONS_00124893 | Nod2_j5   | mmu-miR-544-3p  | -0.065 |
| TCONS_00124893 | Nod2_j5   | mmu-miR-298-5p  | -0.176 |
| TCONS_00124894 | Nod2_j8   | mmu-miR-29b-3p  | -0.362 |
| TCONS_00124894 | Nod2_j8   | mmu-miR-299-3p  | -0.04  |
| TCONS_00124894 | Nod2_j8   | mmu-miR-298-5p  | -0.094 |
| TCONS_00124894 | Nod2_j8   | mmu-miR-19b-3p  | -0.084 |
| TCONS_00124917 | Mmp2_j1   | mmu-miR-29b-3p  | -0.082 |
| TCONS_00124981 | CKLF6_j1  | mmu-miR-299-3p  | -0.131 |
| TCONS_00124989 | Ces2g_j5  | mmu-miR-298-5p  | -0.369 |
| TCONS_00125002 | Slc9a5_j3 | mmu-miR-29b-3p  | -0.053 |
| TCONS_00125002 | Slc9a5_j3 | mmu-miR-544-3p  | -0.045 |
| TCONS_00125137 | Gse1_j5   | mmu-miR-298-5p  | -0.013 |
| TCONS_00125137 | Gse1_j5   | mmu-miR-19b-3p  | -0.171 |
| TCONS_00125143 | Irf8_j3   | mmu-miR-466d-5p | -0.199 |
| TCONS_00125156 | Banp_j6   | mmu-miR-29b-3p  | -0.027 |
| TCONS_00125156 | Banp_j6   | mmu-miR-9-3p    | -0.009 |
| TCONS_00125156 | Banp_j6   | mmu-miR-544-3p  | -0.127 |
| TCONS_00125156 | Banp_j6   | mmu-miR-466d-5p | -0.053 |
| TCONS_00125158 | Banp_j10  | mmu-miR-544-3p  | -0.127 |
| TCONS_00125158 | Banp_j10  | mmu-miR-9-3p    | -0.009 |
| TCONS_00125158 | Banp_j10  | mmu-miR-29b-3p  | -0.027 |
| TCONS_00125158 | Banp_j10  | mmu-miR-466d-5p | -0.053 |
| TCONS_00125188 | Dpep1_j2  | mmu-miR-544-3p  | -0.008 |
| TCONS_00125295 | Cars2_j1  | mmu-miR-299-3p  | -0.17  |
| TCONS_00125344 | Ckap2_j1  | rno-let-7f-1*   | -0.068 |
| TCONS_00125344 | Ckap2_j1  | mmu-let-7a-1-3p | -0.054 |
| TCONS_00125436 | Sgcz_j1   | mmu-miR-2137    | -0.419 |
| TCONS_00125436 | Sgcz_j1   | mmu-miR-466d-5p | -0.383 |
| TCONS_00125436 | Sgcz_j1   | mmu-miR-298-5p  | -0.084 |
| TCONS_00125436 | Sgcz_j1   | mmu-let-7a-1-3p | -0.052 |

|                |             |                 |        |
|----------------|-------------|-----------------|--------|
| TCONS_00125436 | Sgcz_j1     | rno-let-7f-1*   | -0.061 |
| TCONS_00125436 | Sgcz_j1     | mmu-miR-29b-3p  | -0.697 |
| TCONS_00125436 | Sgcz_j1     | mmu-miR-544-3p  | -0.23  |
| TCONS_00125439 | Msr1        | mmu-miR-544-3p  | -0.138 |
| TCONS_00125507 | Tll1_j2     | mmu-miR-29b-3p  | -0.271 |
| TCONS_00125572 | Gm15427_j3  | mmu-miR-467b-5p | -0.07  |
| TCONS_00125572 | Gm15427_j3  | mmu-miR-299-3p  | -0.256 |
| TCONS_00125572 | Gm15427_j3  | mmu-miR-2137    | -0.343 |
| TCONS_00125572 | Gm15427_j3  | mmu-miR-298-5p  | -0.237 |
| TCONS_00125648 | Zfp330_j1   | mmu-miR-298-5p  | -0.12  |
| TCONS_00125648 | Zfp330_j1   | mmu-miR-299-3p  | -0.137 |
| TCONS_00125669 | Dcaf15_j5   | mmu-miR-466d-5p | -0.515 |
| TCONS_00125669 | Dcaf15_j5   | mmu-miR-29b-3p  | -0.16  |
| TCONS_00125669 | Dcaf15_j5   | mmu-miR-467b-5p | -0.109 |
| TCONS_00125683 | Nfix_j4     | mmu-miR-298-5p  | -0.413 |
| TCONS_00125683 | Nfix_j4     | mmu-miR-544-3p  | -0.053 |
| TCONS_00125683 | Nfix_j4     | mmu-miR-29b-3p  | -0.108 |
| TCONS_00125697 | Vps35_j1    | rno-let-7f-1*   | -0.045 |
| TCONS_00125697 | Vps35_j1    | mmu-let-7a-1-3p | -0.042 |
| TCONS_00125754 | XLOC_032981 | mmu-miR-9-3p    | -0.246 |
| TCONS_00125762 | Gm5913      | mmu-miR-544-3p  | -0.201 |
| TCONS_00125796 | Smpd3       | mmu-miR-466d-5p | -0.078 |
| TCONS_00125796 | Smpd3       | mmu-miR-298-5p  | -0.099 |
| TCONS_00125796 | Smpd3       | mmu-miR-29b-3p  | -0.303 |
| TCONS_00125827 | Calb2       | mmu-miR-154-3p  | -0.104 |
| TCONS_00125827 | Calb2       | mmu-miR-466d-5p | -0.071 |
| TCONS_00125903 | Fam92b_j1   | mmu-miR-29b-3p  | -0.093 |
| TCONS_00126517 | XLOC_032144 | mmu-miR-544-3p  | -0.224 |
| TCONS_00126517 | XLOC_032144 | mmu-miR-19b-3p  | -0.099 |
| TCONS_00126672 | Dctd        | mmu-miR-466d-5p | -3.84  |
| TCONS_00126769 | Jak3_j7     | mmu-miR-299-3p  | -0.045 |
| TCONS_00126769 | Jak3_j7     | mmu-miR-298-5p  | -0.017 |
| TCONS_00126863 | Lyl1_j2     | mmu-miR-298-5p  | -0.199 |
| TCONS_00127232 | Brf2_j1     | mmu-miR-299-3p  | -0.226 |
| TCONS_00127232 | Brf2_j1     | rno-let-7f-1*   | -0.095 |
| TCONS_00127232 | Brf2_j1     | mmu-let-7a-1-3p | -0.116 |
| TCONS_00127502 | Slc12a4_j1  | mmu-miR-299-3p  | -0.099 |
| TCONS_00127502 | Slc12a4_j1  | mmu-miR-29b-3p  | -0.051 |
| TCONS_00128017 | Thap1_j3    | mmu-miR-467b-5p | -0.141 |
| TCONS_00128017 | Thap1_j3    | rno-let-7f-1*   | -0.107 |
| TCONS_00128017 | Thap1_j3    | mmu-miR-154-3p  | -0.424 |
| TCONS_00128017 | Thap1_j3    | mmu-let-7a-1-3p | -0.07  |
| TCONS_00128017 | Thap1_j3    | mmu-miR-466d-5p | -0.102 |
| TCONS_00128071 | Aga_j1      | mmu-miR-29b-3p  | -0.252 |
| TCONS_00128145 | Mtap1s_j1   | mmu-miR-29b-3p  | -0.191 |
| TCONS_00128231 | Hook2_j5    | mmu-miR-544-3p  | -0.084 |
| TCONS_00128296 | XLOC_032505 | rno-let-7f-1*   | -0.045 |

|                |                  |                 |        |
|----------------|------------------|-----------------|--------|
| TCONS_00128296 | XLOC_032505      | mmu-miR-466d-5p | -4.94  |
| TCONS_00128296 | XLOC_032505      | mmu-let-7a-1-3p | -0.017 |
| TCONS_00128380 | Klhl36_j2        | mmu-miR-154-3p  | -0.061 |
| TCONS_00128380 | Klhl36_j2        | mmu-miR-299-3p  | -0.002 |
| TCONS_00128397 | Cdt1_j1          | mmu-miR-19b-3p  | -0.102 |
| TCONS_00128584 | Mast3_j3         | mmu-miR-298-5p  | -0.043 |
| TCONS_00128584 | Mast3_j3         | mmu-miR-19b-3p  | -0.014 |
| TCONS_00128608 | 9130011J15Rik_j2 | mmu-miR-19b-3p  | -0.269 |
| TCONS_00128608 | 9130011J15Rik_j2 | mmu-miR-29b-3p  | -0.087 |
| TCONS_00128608 | 9130011J15Rik_j2 | mmu-miR-466d-5p | -0.222 |
| TCONS_00128608 | 9130011J15Rik_j2 | mmu-miR-467b-5p | -0.162 |
| TCONS_00128615 | 1700011L22Rik_j5 | mmu-miR-466d-5p | -0.038 |
| TCONS_00128615 | 1700011L22Rik_j5 | mmu-miR-298-5p  | -0.124 |
| TCONS_00128615 | 1700011L22Rik_j5 | mmu-miR-9-3p    | -0.04  |
| TCONS_00128728 | Marveld3_j1      | mmu-miR-544-3p  | -0.043 |
| TCONS_00128728 | Marveld3_j1      | mmu-miR-19b-3p  | -0.334 |
| TCONS_00128728 | Marveld3_j1      | mmu-miR-467b-5p | -0.105 |
| TCONS_00128749 | 2310061C15Rik_j1 | mmu-miR-29b-3p  | -0.119 |
| TCONS_00128749 | 2310061C15Rik_j1 | mmu-miR-466d-5p | -0.065 |
| TCONS_00128749 | 2310061C15Rik_j1 | mmu-miR-298-5p  | -0.137 |
| TCONS_00128773 | Galns_j4         | mmu-miR-299-3p  | -0.098 |
| TCONS_00129169 | Star             | mmu-miR-466d-5p | -0.04  |
| TCONS_00129169 | Star             | mmu-miR-29b-3p  | -0.031 |
| TCONS_00129169 | Star             | mmu-miR-298-5p  | -0.011 |
| TCONS_00129243 | Zfp964_j1        | mmu-miR-298-5p  | -0.129 |
| TCONS_00129243 | Zfp964_j1        | mmu-miR-466d-5p | -0.077 |
| TCONS_00129288 | Slc27a1_j10      | mmu-miR-466d-5p | -0.067 |
| TCONS_00129288 | Slc27a1_j10      | mmu-miR-299-3p  | -0.292 |
| TCONS_00129288 | Slc27a1_j10      | mmu-miR-298-5p  | -0.382 |
| TCONS_00129422 | Pdp2_j1          | mmu-miR-298-5p  | -0.134 |
| TCONS_00129422 | Pdp2_j1          | mmu-miR-29b-3p  | -0.174 |
| TCONS_00129475 | Cntnap4_j1       | mmu-miR-298-5p  | -0.518 |
| TCONS_00129475 | Cntnap4_j1       | mmu-miR-299-3p  | -0.27  |
| TCONS_00129630 | Ccdc111_j3       | mmu-miR-299-3p  | -0.225 |
| TCONS_00129630 | Ccdc111_j3       | mmu-miR-19b-3p  | -0.186 |
| TCONS_00129630 | Ccdc111_j3       | mmu-miR-9-3p    | -0.014 |
| TCONS_00129630 | Ccdc111_j3       | mmu-miR-466d-5p | -0.055 |
| TCONS_00129630 | Ccdc111_j3       | mmu-miR-544-3p  | -0.373 |
| TCONS_00129725 | Cd97_j3          | mmu-miR-466d-5p | -0.129 |
| TCONS_00129725 | Cd97_j3          | mmu-miR-298-5p  | -0.142 |
| TCONS_00129844 | Galns_j3         | mmu-miR-299-3p  | -0.098 |
| TCONS_00129844 | Galns_j3         | mmu-miR-298-5p  | -0.127 |
| TCONS_00129846 | AK032654_j1      | mmu-miR-544-3p  | -0.113 |
| TCONS_00129846 | AK032654_j1      | mmu-miR-466d-5p | -0.035 |
| TCONS_00129846 | AK032654_j1      | mmu-miR-298-5p  | -0.125 |
| TCONS_00130333 | Podnl1_j5        | mmu-miR-298-5p  | -0.048 |
| TCONS_00130333 | Podnl1_j5        | mmu-miR-544-3p  | -0.151 |

|                |                  |                 |        |
|----------------|------------------|-----------------|--------|
| TCONS_00130342 | Tnpo2_j6         | mmu-miR-298-5p  | -0.202 |
| TCONS_00130342 | Tnpo2_j6         | mmu-miR-19b-3p  | -0.363 |
| TCONS_00130432 | Prmt7_j1         | mmu-miR-544-3p  | -0.031 |
| TCONS_00130432 | Prmt7_j1         | mmu-miR-29b-3p  | -0.077 |
| TCONS_00130432 | Prmt7_j1         | mmu-miR-298-5p  | -0.081 |
| TCONS_00130444 | Wwp2_j2          | mmu-miR-298-5p  | -0.213 |
| TCONS_00130444 | Wwp2_j2          | mmu-miR-2137    | -0.302 |
| TCONS_00130484 | Cdh13_j2         | mmu-miR-466d-5p | -0.227 |
| TCONS_00130486 | Klhl36_j1        | mmu-miR-299-3p  | -0.078 |
| TCONS_00130486 | Klhl36_j1        | mmu-miR-298-5p  | -0.09  |
| TCONS_00130486 | Klhl36_j1        | mmu-miR-29b-3p  | -0.066 |
| TCONS_00130534 | Gm505_j2         | mmu-miR-9-3p    | -0.209 |
| TCONS_00130534 | Gm505_j2         | mmu-miR-29b-3p  | -0.614 |
| TCONS_00130534 | Gm505_j2         | mmu-miR-544-3p  | -0.035 |
| TCONS_00130553 | Pex11c_j2        | mmu-miR-29b-3p  | -0.165 |
| TCONS_00130553 | Pex11c_j2        | mmu-miR-19b-3p  | -0.035 |
| TCONS_00130553 | Pex11c_j2        | mmu-miR-298-5p  | -0.282 |
| TCONS_00130717 | Nfix             | mmu-miR-544-3p  | -0.057 |
| TCONS_00130717 | Nfix             | mmu-miR-466d-5p | -0.019 |
| TCONS_00130717 | Nfix             | mmu-miR-29b-3p  | -0.073 |
| TCONS_00130717 | Nfix             | mmu-miR-298-5p  | -0.155 |
| TCONS_00131187 | Rnf170_j6        | mmu-let-7a-1-3p | -0.07  |
| TCONS_00131187 | Rnf170_j6        | mmu-miR-467b-5p | -0.141 |
| TCONS_00131187 | Rnf170_j6        | mmu-miR-466d-5p | -0.102 |
| TCONS_00131187 | Rnf170_j6        | mmu-miR-154-3p  | -0.424 |
| TCONS_00131187 | Rnf170_j6        | rno-let-7f-1*   | -0.107 |
| TCONS_00131285 | Slc27a1_j5       | mmu-miR-298-5p  | -0.273 |
| TCONS_00131645 | XLOC_032830      | mmu-miR-466d-5p | -0.293 |
| TCONS_00131655 | Upf1_j3          | mmu-miR-2137    | -0.124 |
| TCONS_00131710 | Dcaf15_j1        | mmu-miR-29b-3p  | -0.139 |
| TCONS_00131710 | Dcaf15_j1        | mmu-miR-466d-5p | -0.602 |
| TCONS_00131710 | Dcaf15_j1        | mmu-miR-467b-5p | -0.138 |
| TCONS_00131778 | Fuk_j2           | mmu-miR-467b-5p | -0.051 |
| TCONS_00131778 | Fuk_j2           | mmu-miR-154-3p  | -0.033 |
| TCONS_00131778 | Fuk_j2           | mmu-miR-298-5p  | -0.173 |
| TCONS_00131778 | Fuk_j2           | mmu-miR-29b-3p  | -0.093 |
| TCONS_00131778 | Fuk_j2           | mmu-miR-299-3p  | -0.01  |
| TCONS_00131790 | 2310061C15Rik_j4 | mmu-miR-544-3p  | -0.126 |
| TCONS_00131804 | Kcng4_j2         | mmu-miR-466d-5p | -0.234 |
| TCONS_00132416 | Gldn_j1          | mmu-miR-544-3p  | -0.125 |
| TCONS_00132416 | Gldn_j1          | mmu-miR-29b-3p  | -0.172 |
| TCONS_00132416 | Gldn_j1          | mmu-miR-19b-3p  | -0.069 |
| TCONS_00132438 | Al118078_j2      | mmu-miR-9-3p    | -0.094 |
| TCONS_00132438 | Al118078_j2      | mmu-miR-29b-3p  | -0.086 |
| TCONS_00132616 | Wdr72_j1         | mmu-miR-298-5p  | -0.131 |
| TCONS_00132616 | Wdr72_j1         | mmu-miR-466d-5p | -0.181 |
| TCONS_00132616 | Wdr72_j1         | mmu-miR-154-3p  | -0.053 |

|                |             |                 |        |
|----------------|-------------|-----------------|--------|
| TCONS_00132619 | Onecut1     | mmu-miR-299-3p  | -0.056 |
| TCONS_00132619 | Onecut1     | mmu-miR-9-3p    | -0.382 |
| TCONS_00132619 | Onecut1     | mmu-miR-466d-5p | -0.208 |
| TCONS_00132619 | Onecut1     | mmu-miR-544-3p  | -0.015 |
| TCONS_00132619 | Onecut1     | mmu-miR-29b-3p  | -0.05  |
| TCONS_00132630 | Gnb5        | mmu-let-7a-1-3p | -0.048 |
| TCONS_00132630 | Gnb5        | rno-let-7f-1*   | -0.048 |
| TCONS_00132630 | Gnb5        | mmu-miR-544-3p  | -0.288 |
| TCONS_00132633 | XLOC_034422 | mmu-miR-9-3p    | -0.127 |
| TCONS_00132633 | XLOC_034422 | mmu-miR-544-3p  | -0.287 |
| TCONS_00132633 | XLOC_034422 | mmu-miR-298-5p  | -0.045 |
| TCONS_00132633 | XLOC_034422 | mmu-miR-466d-5p | -0.171 |
| TCONS_00132643 | Elovl5_j5   | mmu-miR-19b-3p  | -0.356 |
| TCONS_00132643 | Elovl5_j5   | rno-let-7f-1*   | -0.017 |
| TCONS_00132643 | Elovl5_j5   | mmu-miR-9-3p    | -0.114 |
| TCONS_00132643 | Elovl5_j5   | mmu-miR-466d-5p | -1.21  |
| TCONS_00132643 | Elovl5_j5   | mmu-miR-154-3p  | -0.22  |
| TCONS_00132643 | Elovl5_j5   | mmu-let-7a-1-3p | -0.02  |
| TCONS_00132672 | Irak1bp1_j1 | rno-let-7f-1*   | -0.215 |
| TCONS_00132672 | Irak1bp1_j1 | mmu-let-7a-1-3p | -0.244 |
| TCONS_00132691 | Mrap2       | mmu-miR-19b-3p  | -0.082 |
| TCONS_00132691 | Mrap2       | mmu-miR-299-3p  | -0.138 |
| TCONS_00132901 | Ngp         | mmu-miR-299-3p  | -0.164 |
| TCONS_00132903 | Kif9_j9     | mmu-miR-466d-5p | -0.075 |
| TCONS_00133176 | Glb1l2_j3   | mmu-miR-544-3p  | -0.016 |
| TCONS_00133176 | Glb1l2_j3   | mmu-miR-19b-3p  | -0.098 |
| TCONS_00133177 | Glb1l2      | mmu-miR-544-3p  | -0.016 |
| TCONS_00133177 | Glb1l2      | mmu-miR-19b-3p  | -0.098 |
| TCONS_00133185 | Ntm         | mmu-miR-544-3p  | -0.085 |
| TCONS_00133276 | C2cd2l_j2   | mmu-miR-9-3p    | -0.035 |
| TCONS_00133276 | C2cd2l_j2   | mmu-miR-299-3p  | -0.274 |
| TCONS_00133276 | C2cd2l_j2   | mmu-miR-298-5p  | -0.149 |
| TCONS_00133297 | Cep164_j4   | mmu-miR-544-3p  | -0.063 |
| TCONS_00133297 | Cep164_j4   | mmu-miR-298-5p  | -0.026 |
| TCONS_00133297 | Cep164_j4   | mmu-miR-466d-5p | -0.255 |
| TCONS_00133297 | Cep164_j4   | mmu-miR-19b-3p  | -0.248 |
| TCONS_00133347 | Gm684       | mmu-miR-299-3p  | -0.396 |
| TCONS_00133349 | AK086943_j3 | mmu-miR-544-3p  | -0.134 |
| TCONS_00133350 | AK086943_j1 | mmu-miR-544-3p  | -0.134 |
| TCONS_00133409 | Clk3_j10    | mmu-miR-544-3p  | -0.114 |
| TCONS_00133528 | Tex9        | mmu-miR-298-5p  | -0.249 |
| TCONS_00133528 | Tex9        | mmu-miR-467b-5p | -0.077 |
| TCONS_00133528 | Tex9        | mmu-miR-544-3p  | -0.109 |
| TCONS_00133592 | Me1_j2      | mmu-miR-9-3p    | -0.041 |
| TCONS_00133592 | Me1_j2      | mmu-miR-544-3p  | -0.067 |
| TCONS_00133618 | Ankrd34c    | mmu-miR-466d-5p | -0.024 |
| TCONS_00133618 | Ankrd34c    | mmu-miR-298-5p  | -0.095 |



|                |            |                 |        |
|----------------|------------|-----------------|--------|
| TCONS_00133618 | Ankrd34c   | mmu-let-7a-1-3p | -0.024 |
| TCONS_00133618 | Ankrd34c   | rno-let-7f-1*   | -0.021 |
| TCONS_00133619 | Ankrd34c   | rno-let-7f-1*   | -0.021 |
| TCONS_00133619 | Ankrd34c   | mmu-miR-466d-5p | -0.024 |
| TCONS_00133619 | Ankrd34c   | mmu-miR-298-5p  | -0.095 |
| TCONS_00133619 | Ankrd34c   | mmu-let-7a-1-3p | -0.024 |
| TCONS_00133627 | Chst2      | mmu-miR-298-5p  | -0.161 |
| TCONS_00133627 | Chst2      | mmu-miR-299-3p  | -0.409 |
| TCONS_00133627 | Chst2      | mmu-miR-466d-5p | -13.2  |
| TCONS_00133666 | Armc8_j4   | mmu-miR-9-3p    | -0.099 |
| TCONS_00133666 | Armc8_j4   | mmu-let-7a-1-3p | -0.103 |
| TCONS_00133666 | Armc8_j4   | mmu-miR-19b-3p  | -0.147 |
| TCONS_00133666 | Armc8_j4   | rno-let-7f-1*   | -0.122 |
| TCONS_00133762 | Atrip_j11  | mmu-miR-298-5p  | -0.142 |
| TCONS_00133762 | Atrip_j11  | mmu-miR-19b-3p  | -0.07  |
| TCONS_00133782 | Arpp21_j6  | mmu-miR-466d-5p | -0.127 |
| TCONS_00133833 | Cx3cr1     | mmu-miR-19b-3p  | -0.006 |
| TCONS_00133833 | Cx3cr1     | mmu-miR-299-3p  | -0.071 |
| TCONS_00134348 | Pdgfd      | mmu-miR-544-3p  | -0.144 |
| TCONS_00134348 | Pdgfd      | mmu-miR-467b-5p | -0.039 |
| TCONS_00134562 | Drd2_j9    | mmu-miR-544-3p  | -0.055 |
| TCONS_00134562 | Drd2_j9    | mmu-miR-299-3p  | -0.073 |
| TCONS_00134562 | Drd2_j9    | mmu-miR-298-5p  | -0.253 |
| TCONS_00134562 | Drd2_j9    | mmu-miR-466d-5p | -0.099 |
| TCONS_00134886 | Nckipsd_j3 | mmu-miR-298-5p  | -0.099 |
| TCONS_00134886 | Nckipsd_j3 | mmu-miR-29b-3p  | -0.227 |
| TCONS_00134916 | Setd2_j3   | mmu-miR-466d-5p | -0.013 |
| TCONS_00134916 | Setd2_j3   | mmu-miR-299-3p  | -0.029 |
| TCONS_00135018 | Limd1_j1   | mmu-miR-9-3p    | -0.016 |
| TCONS_00135018 | Limd1_j1   | mmu-miR-29b-3p  | -0.105 |
| TCONS_00135018 | Limd1_j1   | mmu-miR-298-5p  | -0.199 |
| TCONS_00135018 | Limd1_j1   | mmu-miR-466d-5p | -0.078 |
| TCONS_00135090 | Elavl3_j1  | mmu-miR-544-3p  | -0.041 |
| TCONS_00135090 | Elavl3_j1  | mmu-miR-466d-5p | -1.1   |
| TCONS_00135241 | Cul5_j4    | mmu-miR-19b-3p  | -0.237 |
| TCONS_00135241 | Cul5_j4    | mmu-miR-466d-5p | -0.005 |
| TCONS_00135241 | Cul5_j4    | rno-let-7f-1*   | -0.196 |
| TCONS_00135241 | Cul5_j4    | mmu-let-7a-1-3p | -0.185 |
| TCONS_00135241 | Cul5_j4    | mmu-miR-9-3p    | -0.129 |
| TCONS_00135241 | Cul5_j4    | mmu-miR-154-3p  | -0.038 |
| TCONS_00135241 | Cul5_j4    | mmu-miR-544-3p  | -0.358 |
| TCONS_00135295 | Smad3_j2   | mmu-miR-466d-5p | -0.011 |
| TCONS_00135295 | Smad3_j2   | mmu-miR-298-5p  | -0.146 |
| TCONS_00135489 | Atrip_j5   | mmu-miR-466d-5p | -0.546 |
| TCONS_00135489 | Atrip_j5   | mmu-miR-298-5p  | -0.071 |
| TCONS_00135937 | Pdgfd      | mmu-miR-544-3p  | -0.31  |
| TCONS_00135937 | Pdgfd      | mmu-miR-467b-5p | -0.052 |

|                |             |                 |        |
|----------------|-------------|-----------------|--------|
| TCONS_00136030 | AK014147_j5 | mmu-miR-467b-5p | -0.045 |
| TCONS_00136030 | AK014147_j5 | rno-let-7f-1*   | -0.027 |
| TCONS_00136103 | Cspg4_j1    | mmu-miR-544-3p  | -0.121 |
| TCONS_00136103 | Cspg4_j1    | mmu-miR-298-5p  | -0.007 |
| TCONS_00136103 | Cspg4_j1    | mmu-miR-29b-3p  | -0.328 |
| TCONS_00136103 | Cspg4_j1    | mmu-miR-466d-5p | -0.089 |
| TCONS_00136135 | Megf11_j5   | mmu-miR-467b-5p | -0.036 |
| TCONS_00136135 | Megf11_j5   | mmu-miR-544-3p  | -0.021 |
| TCONS_00136135 | Megf11_j5   | mmu-miR-29b-3p  | -0.211 |
| TCONS_00136135 | Megf11_j5   | mmu-miR-466d-5p | -0.151 |
| TCONS_00136135 | Megf11_j5   | mmu-miR-299-3p  | -0.04  |
| TCONS_00136135 | Megf11_j5   | mmu-let-7a-1-3p | -0.04  |
| TCONS_00136135 | Megf11_j5   | rno-let-7f-1*   | -0.033 |
| TCONS_00136166 | Vps13c_j7   | mmu-miR-154-3p  | -0.259 |
| TCONS_00136166 | Vps13c_j7   | mmu-miR-9-3p    | -0.296 |
| TCONS_00136194 | Elovl5_j4   | rno-let-7f-1*   | -0.097 |
| TCONS_00136194 | Elovl5_j4   | mmu-let-7a-1-3p | -0.065 |
| TCONS_00136255 | Cep70_j4    | mmu-miR-298-5p  | -0.364 |
| TCONS_00136270 | Topbp1_j1   | rno-let-7f-1*   | -0.093 |
| TCONS_00136270 | Topbp1_j1   | mmu-let-7a-1-3p | -0.083 |
| TCONS_00136313 | Nckipsd_j2  | mmu-miR-298-5p  | -0.39  |
| TCONS_00136322 | Pfkfb4_j1   | mmu-miR-466d-5p | -0.152 |
| TCONS_00136322 | Pfkfb4_j1   | mmu-miR-298-5p  | -0.489 |
| TCONS_00136322 | Pfkfb4_j1   | mmu-miR-299-3p  | -0.337 |
| TCONS_00136337 | Kif9_j11    | mmu-miR-9-3p    | -0.074 |
| TCONS_00136399 | Nktr_j5     | mmu-miR-29b-3p  | -0.11  |
| TCONS_00136399 | Nktr_j5     | mmu-miR-298-5p  | -0.053 |
| TCONS_00136399 | Nktr_j5     | mmu-miR-466d-5p | -0.482 |
| TCONS_00136411 | Zfp167_j3   | mmu-miR-29b-3p  | -0.207 |
| TCONS_00136411 | Zfp167_j3   | mmu-miR-466d-5p | -0.051 |
| TCONS_00136411 | Zfp167_j3   | mmu-miR-298-5p  | -0.302 |
| TCONS_00136431 | Birc2_j4    | rno-let-7f-1*   | -0.126 |
| TCONS_00136431 | Birc2_j4    | mmu-let-7a-1-3p | -0.117 |
| TCONS_00136431 | Birc2_j4    | mmu-miR-29b-3p  | -0.268 |
| TCONS_00136483 | Rgl3        | mmu-miR-19b-3p  | -0.111 |
| TCONS_00136576 | Htr3b_j2    | rno-let-7f-1*   | -0.019 |
| TCONS_00136576 | Htr3b_j2    | mmu-let-7a-1-3p | -0.012 |
| TCONS_00136593 | Ddx10_j1    | mmu-let-7a-1-3p | -0.11  |
| TCONS_00136593 | Ddx10_j1    | rno-let-7f-1*   | -0.12  |
| TCONS_00136600 | Rab39_j2    | mmu-miR-467b-5p | -0.097 |
| TCONS_00136600 | Rab39_j2    | mmu-miR-19b-3p  | -0.001 |
| TCONS_00136600 | Rab39_j2    | mmu-miR-9-3p    | -0.141 |
| TCONS_00136612 | Mpi         | mmu-miR-19b-3p  | -0.212 |
| TCONS_00136612 | Mpi         | mmu-miR-299-3p  | -0.013 |
| TCONS_00136612 | Mpi         | mmu-miR-466d-5p | -0.212 |
| TCONS_00136612 | Mpi         | mmu-miR-298-5p  | -0.004 |
| TCONS_00136638 | Zwilch_j2   | mmu-miR-544-3p  | -0.094 |

|                |                  |                 |        |
|----------------|------------------|-----------------|--------|
| TCONS_00136640 | Rab11a_j3        | mmu-miR-299-3p  | -0.068 |
| TCONS_00136640 | Rab11a_j3        | mmu-miR-467b-5p | -0.147 |
| TCONS_00136640 | Rab11a_j3        | mmu-miR-298-5p  | -0.112 |
| TCONS_00136640 | Rab11a_j3        | mmu-miR-29b-3p  | -0.031 |
| TCONS_00136688 | Filip1_j2        | mmu-miR-299-3p  | -0.308 |
| TCONS_00136688 | Filip1_j2        | mmu-let-7a-1-3p | -0.035 |
| TCONS_00136688 | Filip1_j2        | mmu-miR-29b-3p  | -0.121 |
| TCONS_00136688 | Filip1_j2        | mmu-miR-467b-5p | -0.054 |
| TCONS_00136688 | Filip1_j2        | mmu-miR-9-3p    | -0.13  |
| TCONS_00136688 | Filip1_j2        | rno-let-7f-1*   | -0.045 |
| TCONS_00136704 | 4922501C03Rik_j2 | mmu-miR-19b-3p  | -0.024 |
| TCONS_00136704 | 4922501C03Rik_j2 | mmu-miR-466d-5p | -0.029 |
| TCONS_00136704 | 4922501C03Rik_j2 | mmu-miR-298-5p  | -0.074 |
| TCONS_00136845 | XLOC_035131      | mmu-miR-298-5p  | -0.055 |
| TCONS_00136845 | XLOC_035131      | mmu-miR-466d-5p | -0.112 |
| TCONS_00136845 | XLOC_035131      | mmu-miR-19b-3p  | -0.158 |
| TCONS_00136845 | XLOC_035131      | mmu-miR-467b-5p | -0.234 |
| TCONS_00136845 | XLOC_035131      | mmu-miR-544-3p  | -0.065 |
| TCONS_00137240 | Opcml_j3         | mmu-miR-9-3p    | -0.047 |
| TCONS_00137240 | Opcml_j3         | mmu-miR-466d-5p | -4.55  |
| TCONS_00137240 | Opcml_j3         | mmu-miR-544-3p  | -0.033 |
| TCONS_00137245 | Prdm10_j11       | mmu-let-7a-1-3p | -0.176 |
| TCONS_00137245 | Prdm10_j11       | rno-let-7f-1*   | -0.157 |
| TCONS_00137245 | Prdm10_j11       | mmu-miR-29b-3p  | -0.157 |
| TCONS_00137427 | Wdr72_j2         | mmu-miR-298-5p  | -0.118 |
| TCONS_00137427 | Wdr72_j2         | mmu-miR-466d-5p | -0.181 |
| TCONS_00137427 | Wdr72_j2         | mmu-miR-154-3p  | -0.04  |
| TCONS_00137465 | Tpbg             | mmu-miR-298-5p  | -0.126 |
| TCONS_00137468 | Rwdd2a_j1        | mmu-miR-19b-3p  | -0.122 |
| TCONS_00137468 | Rwdd2a_j1        | mmu-miR-299-3p  | -0.16  |
| TCONS_00137468 | Rwdd2a_j1        | mmu-miR-466d-5p | -0.269 |
| TCONS_00137484 | Adamts7_j5       | mmu-miR-466d-5p | -0.077 |
| TCONS_00137484 | Adamts7_j5       | mmu-miR-19b-3p  | -0.365 |
| TCONS_00137484 | Adamts7_j5       | mmu-miR-29b-3p  | -0.129 |
| TCONS_00137578 | Setd2_j2         | mmu-miR-544-3p  | -0.141 |
| TCONS_00137584 | Lrrc2_j1         | mmu-miR-467b-5p | -0.126 |
| TCONS_00137653 | XLOC_034646      | mmu-miR-298-5p  | -0.361 |
| TCONS_00137653 | XLOC_034646      | mmu-miR-466d-5p | -0.058 |
| TCONS_00137814 | Gapdh_j2         | mmu-miR-466d-5p | -0.091 |
| TCONS_00137814 | Gapdh_j2         | mmu-miR-9-3p    | -0.046 |
| TCONS_00137814 | Gapdh_j2         | mmu-miR-467b-5p | -0.116 |
| TCONS_00137814 | Gapdh_j2         | mmu-miR-544-3p  | -0.09  |
| TCONS_00138311 | Slc44a2          | mmu-miR-467b-5p | -0.052 |
| TCONS_00138311 | Slc44a2          | mmu-miR-298-5p  | -0.239 |
| TCONS_00138311 | Slc44a2          | mmu-miR-299-3p  | -0.15  |
| TCONS_00138311 | Slc44a2          | mmu-miR-466d-5p | -0.069 |
| TCONS_00138411 | Chrna5           | mmu-miR-154-3p  | -0.168 |

|                |             |                 |        |
|----------------|-------------|-----------------|--------|
| TCONS_00138411 | Chrna5      | mmu-miR-299-3p  | -0.247 |
| TCONS_00138454 | Parp16_j2   | mmu-miR-298-5p  | -0.155 |
| TCONS_00138467 | Narg2_j5    | mmu-miR-544-3p  | -0.116 |
| TCONS_00138467 | Narg2_j5    | mmu-miR-19b-3p  | -0.246 |
| TCONS_00138581 | Rassf1_j2   | mmu-miR-298-5p  | -0.28  |
| TCONS_00138800 | Tecta_j2    | mmu-miR-298-5p  | -0.318 |
| TCONS_00138800 | Tecta_j2    | mmu-miR-544-3p  | -0.116 |
| TCONS_00138876 | Islr_j1     | mmu-miR-544-3p  | -0.14  |
| TCONS_00138991 | Ppm1m_j4    | mmu-miR-298-5p  | -0.331 |
| TCONS_00138991 | Ppm1m_j4    | mmu-miR-19b-3p  | -0.14  |
| TCONS_00139062 | Fyco1_j4    | mmu-miR-9-3p    | -0.003 |
| TCONS_00139366 | Gpr83_j1    | mmu-miR-299-3p  | -0.093 |
| TCONS_00139404 | Cdon_j4     | mmu-miR-19b-3p  | -0.055 |
| TCONS_00139404 | Cdon_j4     | mmu-miR-29b-3p  | -0.163 |
| TCONS_00139423 | AK014147_j1 | rno-let-7f-1*   | -0.026 |
| TCONS_00139423 | AK014147_j1 | mmu-miR-299-3p  | -0.071 |
| TCONS_00139538 | Rora_j1     | mmu-miR-29b-3p  | -0.132 |
| TCONS_00139538 | Rora_j1     | mmu-miR-466d-5p | -0.054 |
| TCONS_00139538 | Rora_j1     | mmu-miR-19b-3p  | -0.688 |
| TCONS_00139538 | Rora_j1     | rno-let-7f-1*   | -0.006 |
| TCONS_00139538 | Rora_j1     | mmu-miR-298-5p  | -0.004 |
| TCONS_00139538 | Rora_j1     | mmu-let-7a-1-3p | -0.006 |
| TCONS_00139585 | Tpbp_j1     | mmu-miR-298-5p  | -0.126 |
| TCONS_00139596 | Ctsh_j1     | mmu-miR-466d-5p | -0.149 |
| TCONS_00139685 | Dclk3_j2    | rno-let-7f-1*   | -0.115 |
| TCONS_00139685 | Dclk3_j2    | mmu-miR-154-3p  | -0.339 |
| TCONS_00139685 | Dclk3_j2    | mmu-let-7a-1-3p | -0.115 |
| TCONS_00139685 | Dclk3_j2    | mmu-miR-544-3p  | -0.125 |
| TCONS_00139834 | Hmbs_j3     | mmu-miR-2137    | -0.588 |
| TCONS_00139835 | Hmbs_j2     | mmu-miR-2137    | -0.588 |
| TCONS_00139941 | Aqp9_j1     | mmu-miR-298-5p  | -0.303 |
| TCONS_00139941 | Aqp9_j1     | mmu-miR-467b-5p | -0.273 |
| TCONS_00139983 | Ankrd34c_j3 | mmu-miR-466d-5p | -2.12  |
| TCONS_00139983 | Ankrd34c_j3 | mmu-let-7a-1-3p | -0.024 |
| TCONS_00139983 | Ankrd34c_j3 | mmu-miR-467b-5p | -0.054 |
| TCONS_00139983 | Ankrd34c_j3 | rno-let-7f-1*   | -0.021 |
| TCONS_00139983 | Ankrd34c_j3 | mmu-miR-19b-3p  | -0.072 |
| TCONS_00139983 | Ankrd34c_j3 | mmu-miR-298-5p  | -0.349 |
| TCONS_00140059 | Scn10a_j3   | mmu-miR-466d-5p | -1.44  |
| TCONS_00140059 | Scn10a_j3   | mmu-miR-29b-3p  | -0.084 |
| TCONS_00140059 | Scn10a_j3   | mmu-miR-154-3p  | -0.107 |
| TCONS_00140059 | Scn10a_j3   | mmu-miR-298-5p  | -0.25  |
| TCONS_00140341 | Gpkow_j1    | mmu-miR-466d-5p | -0.102 |
| TCONS_00140341 | Gpkow_j1    | mmu-miR-467b-5p | -0.216 |
| TCONS_00140341 | Gpkow_j1    | mmu-let-7a-1-3p | -0.117 |
| TCONS_00140341 | Gpkow_j1    | rno-let-7f-1*   | -0.117 |
| TCONS_00140362 | Lancl3      | rno-let-7f-1*   | -0.092 |

|                |             |                 |        |
|----------------|-------------|-----------------|--------|
| TCONS_00140362 | Lancl3      | mmu-let-7a-1-3p | -0.082 |
| TCONS_00140362 | Lancl3      | mmu-miR-9-3p    | -0.073 |
| TCONS_00140451 | Ocr1_j1     | mmu-miR-466d-5p | -0.005 |
| TCONS_00140451 | Ocr1_j1     | mmu-miR-154-3p  | -0.095 |
| TCONS_00140451 | Ocr1_j1     | mmu-miR-19b-3p  | -0.154 |
| TCONS_00140628 | Klhl15_j3   | rno-let-7f-1*   | -0.01  |
| TCONS_00140628 | Klhl15_j3   | mmu-miR-9-3p    | -0.14  |
| TCONS_00140628 | Klhl15_j3   | mmu-miR-19b-3p  | -0.064 |
| TCONS_00140628 | Klhl15_j3   | mmu-miR-466d-5p | -0.183 |
| TCONS_00140628 | Klhl15_j3   | mmu-let-7a-1-3p | -0.01  |
| TCONS_00140637 | Gm14827_j8  | mmu-miR-299-3p  | -0.037 |
| TCONS_00140637 | Gm14827_j8  | mmu-miR-466d-5p | -0.141 |
| TCONS_00140637 | Gm14827_j8  | mmu-miR-544-3p  | -0.026 |
| TCONS_00140738 | Pcdh11x_j5  | mmu-miR-154-3p  | -0.088 |
| TCONS_00140738 | Pcdh11x_j5  | mmu-miR-9-3p    | -0.176 |
| TCONS_00140738 | Pcdh11x_j5  | rno-let-7f-1*   | -0.22  |
| TCONS_00140738 | Pcdh11x_j5  | mmu-miR-466d-5p | -0.161 |
| TCONS_00140738 | Pcdh11x_j5  | mmu-let-7a-1-3p | -0.187 |
| TCONS_00140773 | Gprasp1_j3  | mmu-miR-466d-5p | -0.505 |
| TCONS_00140773 | Gprasp1_j3  | mmu-miR-544-3p  | -0.101 |
| TCONS_00140799 | Prps1_j2    | mmu-miR-9-3p    | -0.156 |
| TCONS_00140928 | Pir_j2      | mmu-miR-154-3p  | -0.189 |
| TCONS_00140944 | Mid1_j3     | mmu-miR-2137    | -0.2   |
| TCONS_00141079 | Zfp280c_j5  | mmu-miR-299-3p  | -0.46  |
| TCONS_00141080 | Zfp280c_j6  | mmu-miR-299-3p  | -0.46  |
| TCONS_00141167 | Hcfc1_j1    | mmu-miR-298-5p  | -0.303 |
| TCONS_00141167 | Hcfc1_j1    | mmu-miR-19b-3p  | -0.041 |
| TCONS_00141177 | Flna_j9     | mmu-miR-544-3p  | -0.107 |
| TCONS_00141339 | Rps6ka6_j2  | mmu-miR-154-3p  | -0.189 |
| TCONS_00141339 | Rps6ka6_j2  | mmu-miR-467b-5p | -0.065 |
| TCONS_00141339 | Rps6ka6_j2  | rno-let-7f-1*   | -0.172 |
| TCONS_00141339 | Rps6ka6_j2  | mmu-let-7a-1-3p | -0.2   |
| TCONS_00141339 | Rps6ka6_j2  | mmu-miR-298-5p  | -0.133 |
| TCONS_00141371 | Tceal6      | mmu-miR-9-3p    | -0.023 |
| TCONS_00141371 | Tceal6      | mmu-miR-544-3p  | -0.253 |
| TCONS_00142054 | AK013876_j2 | mmu-miR-29b-3p  | -0.084 |
| TCONS_00142054 | AK013876_j2 | mmu-miR-9-3p    | -0.058 |
| TCONS_00142634 | Lancl3_j2   | rno-let-7f-1*   | -0.092 |
| TCONS_00142634 | Lancl3_j2   | mmu-miR-9-3p    | -0.073 |
| TCONS_00142634 | Lancl3_j2   | mmu-let-7a-1-3p | -0.082 |
| TCONS_00142702 | Aff2_j3     | mmu-let-7a-1-3p | -0.047 |
| TCONS_00142702 | Aff2_j3     | mmu-miR-19b-3p  | -0.139 |
| TCONS_00142702 | Aff2_j3     | mmu-miR-154-3p  | -0.034 |
| TCONS_00142702 | Aff2_j3     | mmu-miR-466d-5p | -0.106 |
| TCONS_00142702 | Aff2_j3     | rno-let-7f-1*   | -0.015 |
| TCONS_00142711 | Atp2b3      | mmu-miR-467b-5p | -0.052 |
| TCONS_00142711 | Atp2b3      | mmu-miR-298-5p  | -0.168 |

|                |            |                 |        |
|----------------|------------|-----------------|--------|
| TCONS_00142711 | Atp2b3     | mmu-miR-466d-5p | -6.77  |
| TCONS_00142711 | Atp2b3     | mmu-let-7a-1-3p | -0.063 |
| TCONS_00142711 | Atp2b3     | rno-let-7f-1*   | -0.069 |
| TCONS_00142775 | Ogt_j1     | mmu-miR-467b-5p | -0.114 |
| TCONS_00142775 | Ogt_j1     | mmu-miR-544-3p  | -0.014 |
| TCONS_00142886 | Phf8_j5    | mmu-miR-299-3p  | -0.379 |
| TCONS_00142954 | Plp2_j4    | mmu-miR-298-5p  | -0.119 |
| TCONS_00142954 | Plp2_j4    | mmu-miR-299-3p  | -0.406 |
| TCONS_00142954 | Plp2_j4    | mmu-miR-29b-3p  | -0.044 |
| TCONS_00142977 | Med14      | mmu-miR-298-5p  | -0.107 |
| TCONS_00143009 | Zfp280c_j4 | mmu-miR-299-3p  | -0.46  |
| TCONS_00143047 | Hcfc1_j2   | mmu-miR-298-5p  | -0.32  |
| TCONS_00143047 | Hcfc1_j2   | mmu-miR-19b-3p  | -0.041 |
| TCONS_00143064 | Prrg1_j2   | mmu-miR-299-3p  | -0.071 |
| TCONS_00143064 | Prrg1_j2   | mmu-miR-544-3p  | -0.234 |
| TCONS_00143064 | Prrg1_j2   | mmu-miR-9-3p    | -0.231 |
| TCONS_00143064 | Prrg1_j2   | mmu-miR-154-3p  | -0.182 |
| TCONS_00143064 | Prrg1_j2   | mmu-miR-466d-5p | -0.135 |
| TCONS_00143065 | Prrg1_j3   | mmu-miR-9-3p    | -0.231 |
| TCONS_00143065 | Prrg1_j3   | mmu-miR-544-3p  | -0.234 |
| TCONS_00143065 | Prrg1_j3   | mmu-miR-466d-5p | -0.135 |
| TCONS_00143065 | Prrg1_j3   | mmu-miR-299-3p  | -0.071 |
| TCONS_00143065 | Prrg1_j3   | mmu-miR-154-3p  | -0.182 |
| TCONS_00143187 | Frmpd4_j4  | mmu-miR-298-5p  | -0.162 |
| TCONS_00143187 | Frmpd4_j4  | mmu-miR-299-3p  | -0.061 |
| TCONS_00143187 | Frmpd4_j4  | mmu-miR-544-3p  | -0.094 |
| TCONS_00143378 | Kdm6a_j6   | mmu-miR-19b-3p  | -0.122 |
| TCONS_00143378 | Kdm6a_j6   | mmu-let-7a-1-3p | -0.113 |
| TCONS_00143378 | Kdm6a_j6   | rno-let-7f-1*   | -0.113 |
| TCONS_00143440 | Atp2b3_j6  | mmu-miR-298-5p  | -0.299 |
| TCONS_00143498 | Ogt_j8     | mmu-miR-544-3p  | -0.022 |
| TCONS_00143498 | Ogt_j8     | mmu-miR-467b-5p | -0.113 |
| TCONS_00143655 | Sept6_j7   | mmu-miR-19b-3p  | -0.105 |
| TCONS_00143725 | Flna_j14   | mmu-miR-466d-5p | -0.152 |
| TCONS_00143725 | Flna_j14   | mmu-miR-298-5p  | -0.211 |
| TCONS_00143831 | Dcx        | mmu-miR-466d-5p | -0.009 |
| TCONS_00143831 | Dcx        | mmu-miR-299-3p  | -0.039 |
| TCONS_00143831 | Dcx        | mmu-miR-544-3p  | -0.18  |
| TCONS_00143831 | Dcx        | rno-let-7f-1*   | -0.018 |
| TCONS_00143831 | Dcx        | mmu-miR-29b-3p  | -0.293 |
| TCONS_00143831 | Dcx        | mmu-let-7a-1-3p | -0.071 |
| TCONS_00143831 | Dcx        | mmu-miR-467b-5p | -0.096 |
| TCONS_00143865 | Frmpd4_j1  | mmu-miR-544-3p  | -0.073 |
| TCONS_00143865 | Frmpd4_j1  | mmu-miR-299-3p  | -0.295 |
| TCONS_00143865 | Frmpd4_j1  | mmu-miR-154-3p  | -0.063 |
| TCONS_00144055 | Hmgb3_j5   | mmu-let-7a-1-3p | -0.039 |
| TCONS_00144055 | Hmgb3_j5   | rno-let-7f-1*   | -0.03  |

|                |             |                 |        |
|----------------|-------------|-----------------|--------|
| TCONS_00144102 | Gdpd2_j5    | mmu-miR-298-5p  | -0.1   |
| TCONS_00144102 | Gdpd2_j5    | mmu-miR-544-3p  | -0.063 |
| TCONS_00144334 | Arhgap4_j1  | mmu-miR-299-3p  | -0.101 |
| TCONS_00144346 | Flna_j12    | mmu-miR-466d-5p | -0.088 |
| TCONS_00144346 | Flna_j12    | mmu-miR-298-5p  | -0.147 |
| TCONS_00144346 | Flna_j12    | mmu-miR-544-3p  | -0.02  |
| TCONS_00144595 | Syp_j3      | mmu-miR-29b-3p  | -0.161 |
| TCONS_00144595 | Syp_j3      | mmu-miR-544-3p  | -0.11  |
| TCONS_00144595 | Syp_j3      | mmu-miR-298-5p  | -0.076 |
| TCONS_00144630 | Ube2a       | mmu-miR-467b-5p | -0.113 |
| TCONS_00144630 | Ube2a       | mmu-miR-299-3p  | -0.029 |
| TCONS_00144630 | Ube2a       | mmu-miR-19b-3p  | -0.1   |
| TCONS_00144630 | Ube2a       | mmu-miR-466d-5p | -0.094 |
| TCONS_00144741 | Uprt_j1     | mmu-miR-466d-5p | -3.47  |
| TCONS_00144741 | Uprt_j1     | mmu-miR-544-3p  | -0.098 |
| TCONS_00144741 | Uprt_j1     | mmu-miR-299-3p  | -0.131 |
| TCONS_00144741 | Uprt_j1     | mmu-miR-19b-3p  | -0.005 |
| TCONS_00144741 | Uprt_j1     | mmu-miR-467b-5p | -0.13  |
| TCONS_00144741 | Uprt_j1     | mmu-miR-154-3p  | -0.134 |
| TCONS_00144741 | Uprt_j1     | rno-let-7f-1*   | -0.001 |
| TCONS_00144741 | Uprt_j1     | mmu-miR-29b-3p  | -0.095 |
| TCONS_00144741 | Uprt_j1     | mmu-let-7a-1-3p | -0.008 |
| TCONS_00144741 | Uprt_j1     | mmu-miR-298-5p  | -0.019 |
| TCONS_00144825 | XLOC_036520 | mmu-miR-29b-3p  | -0.186 |
| TCONS_00144825 | XLOC_036520 | mmu-miR-154-3p  | -0.039 |
| TCONS_00144825 | XLOC_036520 | mmu-miR-466d-5p | -4.29  |
| TCONS_00144896 | Atp11c_j9   | mmu-miR-544-3p  | -0.212 |
| TCONS_00144896 | Atp11c_j9   | mmu-miR-467b-5p | -0.123 |
| TCONS_00144896 | Atp11c_j9   | mmu-miR-466d-5p | -0.23  |
| TCONS_00145008 | Gpr173_j5   | mmu-miR-466d-5p | -0.663 |
| TCONS_00145008 | Gpr173_j5   | mmu-miR-154-3p  | -0.022 |
| TCONS_00145008 | Gpr173_j5   | mmu-miR-299-3p  | -0.314 |
| TCONS_00145023 | Car5b_j2    | mmu-miR-154-3p  | -0.044 |
| TCONS_00145023 | Car5b_j2    | mmu-miR-298-5p  | -0.16  |
| TCONS_00145023 | Car5b_j2    | mmu-miR-299-3p  | -0.139 |
| TCONS_00145023 | Car5b_j2    | mmu-miR-29b-3p  | -0.348 |
| TCONS_00145031 | Frmpd4_j2   | mmu-miR-299-3p  | -0.061 |
| TCONS_00145031 | Frmpd4_j2   | mmu-miR-544-3p  | -0.094 |
