# Supplementary material
Source: PubMed Central journal article supplement (PMC5864114)
Supplement: NIHMS942947-supplement-Supp_TableS11.pdf [file NIHMS942947-supplement-Supp_TableS11.pdf]

Table S11

| GENE NAME     | # OF ISOFORMS EXPRESSED | # OF ISOFORMS DIFFERENTIALLY EXPRESSED | # OF ISOFORMS UPREGULATED | # OF ISOFORMS DOWNREGULATED |
|---------------|-------------------------|----------------------------------------|---------------------------|-----------------------------|
| Lmo7          | 13                      | 10                                     | 10                        | 0                           |
| Ecel1         | 14                      | 8                                      | 8                         | 0                           |
| Slc29a1       | 16                      | 6                                      | 4                         | 2                           |
| Abca2         | 10                      | 6                                      | 3                         | 3                           |
| Pigo          | 10                      | 6                                      | 3                         | 3                           |
| Adam8         | 9                       | 6                                      | 6                         | 0                           |
| Odz3          | 10                      | 6                                      | 2                         | 4                           |
| Sdc1          | 6                       | 5                                      | 5                         | 0                           |
| Gap43         | 7                       | 5                                      | 5                         | 0                           |
| Zbtb46        | 7                       | 5                                      | 3                         | 2                           |
| Epb4.1l4b     | 11                      | 5                                      | 3                         | 2                           |
| Adamts9       | 6                       | 5                                      | 3                         | 2                           |
| E430016F16Rik | 14                      | 5                                      | 1                         | 4                           |
| Kcnc3         | 7                       | 5                                      | 0                         | 5                           |
| Pde4c         | 17                      | 5                                      | 4                         | 1                           |
| Ddx6          | 8                       | 5                                      | 1                         | 4                           |
| Islr2         | 9                       | 5                                      | 3                         | 2                           |
| Hivep2        | 5                       | 4                                      | 1                         | 3                           |
| Rab5b         | 10                      | 4                                      | 3                         | 1                           |
| Recql5        | 7                       | 4                                      | 2                         | 2                           |
| Dtnb          | 9                       | 4                                      | 2                         | 2                           |
| Pdlim7        | 12                      | 4                                      | 3                         | 1                           |
| Agtppb1       | 7                       | 4                                      | 2                         | 2                           |
| Zmiz1         | 9                       | 4                                      | 2                         | 2                           |
| Zfp395        | 6                       | 4                                      | 1                         | 3                           |
| Nalcn         | 10                      | 4                                      | 3                         | 1                           |
| Phf21b        | 9                       | 4                                      | 2                         | 2                           |
| Csf2rb        | 5                       | 4                                      | 3                         | 1                           |
| Mx2           | 7                       | 4                                      | 2                         | 2                           |
| Rhoq          | 8                       | 4                                      | 4                         | 0                           |
| Socs6         | 5                       | 4                                      | 2                         | 2                           |
| Add3          | 7                       | 4                                      | 2                         | 2                           |
| Hps1          | 11                      | 4                                      | 3                         | 1                           |
| Lypd6b        | 10                      | 4                                      | 1                         | 3                           |
| Nfe2l2        | 5                       | 4                                      | 2                         | 2                           |
| Lama5         | 7                       | 4                                      | 4                         | 0                           |
| Ccnl1         | 10                      | 4                                      | 3                         | 1                           |
| Crocc         | 19                      | 4                                      | 2                         | 2                           |
| Kdm2b         | 11                      | 4                                      | 3                         | 1                           |
| 9530026P05Rik | 6                       | 4                                      | 2                         | 2                           |
| Ptpro         | 6                       | 4                                      | 3                         | 1                           |
| Zfp446        | 8                       | 4                                      | 3                         | 1                           |

|               |    |   |   |   |
|---------------|----|---|---|---|
| Vstm2b        | 4  | 4 | 0 | 4 |
| Pard3         | 13 | 4 | 2 | 2 |
| XLOC_034806   | 9  | 4 | 2 | 2 |
| Dock3         | 9  | 4 | 1 | 3 |
| Mtap2         | 11 | 3 | 1 | 2 |
| Serpinb5      | 9  | 3 | 2 | 1 |
| Rims1         | 22 | 3 | 1 | 2 |
| Fam135a       | 8  | 3 | 1 | 2 |
| Rasal2        | 8  | 3 | 2 | 1 |
| Fam161a       | 13 | 3 | 2 | 1 |
| 9130409J20Rik | 6  | 3 | 2 | 1 |
| Fmnl1         | 11 | 3 | 1 | 2 |
| Cbx2          | 6  | 3 | 2 | 1 |
| Kcnp1         | 10 | 3 | 1 | 2 |
| Ints2         | 5  | 3 | 1 | 2 |
| Itga3         | 10 | 3 | 1 | 2 |
| Plekhh3       | 7  | 3 | 2 | 1 |
| Ctage5        | 9  | 3 | 2 | 1 |
| Ppm1a         | 7  | 3 | 1 | 2 |
| Jarid2        | 7  | 3 | 1 | 2 |
| Gcnt4         | 4  | 3 | 2 | 1 |
| Gtpbp4        | 5  | 3 | 3 | 0 |
| Ryr2          | 14 | 3 | 1 | 2 |
| Serpinb1a     | 5  | 3 | 3 | 0 |
| Cntnap3       | 5  | 3 | 1 | 2 |
| Stmn4         | 4  | 3 | 3 | 0 |
| Stab1         | 9  | 3 | 3 | 0 |
| Cdh12         | 4  | 3 | 1 | 2 |
| Rims2         | 15 | 3 | 0 | 3 |
| Col14a1       | 4  | 3 | 2 | 1 |
| XLOC_011139   | 11 | 3 | 1 | 2 |
| Eif3e         | 5  | 3 | 2 | 1 |
| Enpp2         | 10 | 3 | 0 | 3 |
| Pvalb         | 6  | 3 | 0 | 3 |
| Fyb           | 6  | 3 | 3 | 0 |
| B3gnt5        | 7  | 3 | 1 | 2 |
| Zbtb20        | 6  | 3 | 1 | 2 |
| Senp7         | 7  | 3 | 2 | 1 |
| Lrrc33        | 6  | 3 | 2 | 1 |
| Col11a2       | 5  | 3 | 2 | 1 |
| Trerf1        | 9  | 3 | 0 | 3 |
| Fam82a1       | 10 | 3 | 2 | 1 |
| Cyp1b1        | 3  | 3 | 3 | 0 |
| Kcnk12        | 4  | 3 | 2 | 1 |
| Wdr33         | 8  | 3 | 2 | 1 |
| Tnfrsf8       | 5  | 3 | 2 | 1 |
| Slmo1         | 6  | 3 | 1 | 2 |

|               |    |   |   |   |
|---------------|----|---|---|---|
| Hars          | 5  | 3 | 2 | 1 |
| Arap3         | 11 | 3 | 3 | 0 |
| XLOC_015994   | 9  | 3 | 3 | 0 |
| Arhgef37      | 10 | 3 | 1 | 2 |
| Prune2        | 9  | 3 | 2 | 1 |
| Il33          | 4  | 3 | 2 | 1 |
| AK040090      | 7  | 3 | 2 | 1 |
| Carns1        | 9  | 3 | 1 | 2 |
| Naa40         | 7  | 3 | 1 | 2 |
| Tjp2          | 7  | 3 | 1 | 2 |
| Dnmbp         | 8  | 3 | 2 | 1 |
| Vim           | 8  | 3 | 3 | 0 |
| Tnks1bp1      | 8  | 3 | 3 | 0 |
| Zc3h6         | 8  | 3 | 2 | 1 |
| Baz2b         | 10 | 3 | 1 | 2 |
| Ly75          | 8  | 3 | 1 | 2 |
| Lrrc31        | 5  | 3 | 1 | 2 |
| Rps3a         | 7  | 3 | 3 | 0 |
| Cnr1          | 6  | 3 | 1 | 2 |
| Cntl          | 10 | 3 | 2 | 1 |
| mFLJ00377     | 4  | 3 | 1 | 2 |
| Faf1          | 6  | 3 | 1 | 2 |
| Zmym6         | 10 | 3 | 2 | 1 |
| Acot7         | 8  | 3 | 1 | 2 |
| Acap3         | 7  | 3 | 3 | 0 |
| Wwp1          | 9  | 3 | 0 | 3 |
| Klhl32        | 8  | 3 | 2 | 1 |
| Tpm2          | 7  | 3 | 2 | 1 |
| 2610109H07Rik | 3  | 3 | 3 | 0 |
| Mib2          | 7  | 3 | 1 | 2 |
| Magi2         | 8  | 3 | 2 | 1 |
| Vgf           | 7  | 3 | 3 | 0 |
| Kctd8         | 8  | 3 | 2 | 1 |
| Tec           | 7  | 3 | 1 | 2 |
| Ep400         | 12 | 3 | 1 | 2 |
| Grm8          | 9  | 3 | 1 | 2 |
| Chchd3        | 4  | 3 | 2 | 1 |
| Gadd45a       | 6  | 3 | 3 | 0 |
| Srgap3        | 7  | 3 | 1 | 2 |
| Mical3        | 11 | 3 | 2 | 1 |
| Tspan9        | 5  | 3 | 1 | 2 |
| Nav2          | 12 | 3 | 3 | 0 |
| Zscan18       | 6  | 3 | 3 | 0 |
| Plekha7       | 12 | 3 | 1 | 2 |
| Zfp629        | 6  | 3 | 1 | 2 |
| Mettl10       | 10 | 3 | 1 | 2 |
| Nlrc5         | 12 | 3 | 1 | 2 |

|               |    |   |   |   |
|---------------|----|---|---|---|
| Cmtm3         | 7  | 3 | 2 | 1 |
| Nfat5         | 7  | 3 | 2 | 1 |
| Banp          | 12 | 3 | 1 | 2 |
| Cars2         | 4  | 3 | 2 | 1 |
| Slc27a1       | 16 | 3 | 2 | 1 |
| Arhgap32      | 7  | 3 | 1 | 2 |
| Vps13c        | 7  | 3 | 1 | 2 |
| Clk3          | 11 | 3 | 2 | 1 |
| Map2k5        | 8  | 3 | 1 | 2 |
| 2310046A06Rik | 11 | 3 | 2 | 1 |
| Ankrd34c      | 4  | 3 | 0 | 3 |
| Mras          | 5  | 3 | 2 | 1 |
| Scn10a        | 8  | 3 | 2 | 1 |
| Mid1          | 9  | 3 | 1 | 2 |
| Zfp280c       | 10 | 3 | 0 | 3 |
| Flna          | 13 | 3 | 2 | 1 |
| Frmpd4        | 8  | 3 | 0 | 3 |
| Aox1          | 9  | 2 | 1 | 1 |
| Cflar         | 9  | 2 | 2 | 0 |
| Gm15427       | 12 | 2 | 1 | 1 |
| Zcchc2        | 6  | 2 | 0 | 2 |
| Kcnt2         | 11 | 2 | 1 | 1 |
| Igsf8         | 4  | 2 | 1 | 1 |
| Lamb3         | 8  | 2 | 2 | 0 |
| XLOC_000548   | 7  | 2 | 0 | 2 |
| Sox17         | 8  | 2 | 1 | 1 |
| 2010300C02Rik | 8  | 2 | 1 | 1 |
| Pign          | 10 | 2 | 1 | 1 |
| Dbi           | 7  | 2 | 0 | 2 |
| Cacna1e       | 8  | 2 | 1 | 1 |
| Rabgap1l      | 6  | 2 | 1 | 1 |
| Igfn1         | 6  | 2 | 2 | 0 |
| Soat1         | 3  | 2 | 2 | 0 |
| Cited2        | 3  | 2 | 1 | 1 |
| Epb4.1l2      | 9  | 2 | 2 | 0 |
| Arhgap18      | 10 | 2 | 1 | 1 |
| Ptprk         | 7  | 2 | 1 | 1 |
| Scml4         | 5  | 2 | 1 | 1 |
| Cd24a         | 4  | 2 | 0 | 2 |
| Egr2          | 4  | 2 | 1 | 1 |
| Arid3a        | 5  | 2 | 1 | 1 |
| Ppfia2        | 12 | 2 | 2 | 0 |
| Stat6         | 4  | 2 | 1 | 1 |
| Baz2a         | 8  | 2 | 1 | 1 |
| Ybey          | 3  | 2 | 1 | 1 |
| Agpat3        | 8  | 2 | 1 | 1 |
| Polrmt        | 4  | 2 | 2 | 0 |

|               |    |   |   |   |
|---------------|----|---|---|---|
| Nts           | 5  | 2 | 2 | 0 |
| Helb          | 7  | 2 | 1 | 1 |
| Ptges3        | 4  | 2 | 1 | 1 |
| Aim1          | 3  | 2 | 2 | 0 |
| Gm10754       | 6  | 2 | 1 | 1 |
| Rtn4          | 7  | 2 | 1 | 1 |
| Lcp2          | 4  | 2 | 0 | 2 |
| Adam19        | 6  | 2 | 2 | 0 |
| Zfp354a       | 5  | 2 | 1 | 1 |
| Fnip1         | 6  | 2 | 1 | 1 |
| Sat2          | 6  | 2 | 1 | 1 |
| Nufip2        | 3  | 2 | 1 | 1 |
| Taf15         | 11 | 2 | 2 | 0 |
| Coil          | 3  | 2 | 2 | 0 |
| Thra          | 7  | 2 | 1 | 1 |
| Hexim2        | 8  | 2 | 1 | 1 |
| Tlk2          | 8  | 2 | 1 | 1 |
| Ccdc46        | 6  | 2 | 1 | 1 |
| Kcnj16        | 3  | 2 | 1 | 1 |
| Metrn1        | 3  | 2 | 2 | 0 |
| Odz2          | 10 | 2 | 1 | 1 |
| Hnrnpab       | 6  | 2 | 1 | 1 |
| Phf15         | 7  | 2 | 0 | 2 |
| Slc16a13      | 6  | 2 | 1 | 1 |
| 0610010K14Rik | 10 | 2 | 1 | 1 |
| Cxcl16        | 8  | 2 | 2 | 0 |
| Nme1          | 5  | 2 | 0 | 2 |
| Plxdc1        | 8  | 2 | 1 | 1 |
| St6galnac2    | 7  | 2 | 1 | 1 |
| Sectm1b       | 3  | 2 | 2 | 0 |
| Egfr          | 6  | 2 | 2 | 0 |
| 41890         | 6  | 2 | 1 | 1 |
| Laptm4a       | 5  | 2 | 1 | 1 |
| Srsf5         | 7  | 2 | 0 | 2 |
| Rgs6          | 6  | 2 | 0 | 2 |
| Zfp410        | 7  | 2 | 0 | 2 |
| Zfp839        | 6  | 2 | 1 | 1 |
| AW555464      | 6  | 2 | 1 | 1 |
| Pld4          | 3  | 2 | 2 | 0 |
| F730043M19Rik | 6  | 2 | 1 | 1 |
| Heatr5a       | 7  | 2 | 1 | 1 |
| Asb2          | 7  | 2 | 1 | 1 |
| Ccdc85c       | 5  | 2 | 0 | 2 |
| Begain        | 4  | 2 | 1 | 1 |
| XLOC_006968   | 7  | 2 | 2 | 0 |
| Rnf182        | 4  | 2 | 0 | 2 |
| Bicd2         | 5  | 2 | 2 | 0 |

|               |    |   |   |   |
|---------------|----|---|---|---|
| Tmed9         | 5  | 2 | 1 | 1 |
| Zfp273        | 4  | 2 | 1 | 1 |
| C130071C03Rik | 4  | 2 | 1 | 1 |
| Klhl3         | 7  | 2 | 0 | 2 |
| Ddx4          | 5  | 2 | 1 | 1 |
| Fst           | 3  | 2 | 2 | 0 |
| Sykb          | 6  | 2 | 2 | 0 |
| Gm8104        | 4  | 2 | 0 | 2 |
| Lgals3        | 2  | 2 | 2 | 0 |
| Clu           | 7  | 2 | 2 | 0 |
| Loxl2         | 2  | 2 | 2 | 0 |
| Mbnl2         | 9  | 2 | 1 | 1 |
| Oxsm          | 4  | 2 | 0 | 2 |
| Gng2          | 5  | 2 | 1 | 1 |
| Cysltr2       | 7  | 2 | 1 | 1 |
| 1110020G09Rik | 6  | 2 | 2 | 0 |
| Cdh10         | 3  | 2 | 1 | 1 |
| Fzd6          | 3  | 2 | 1 | 1 |
| Mal2          | 4  | 2 | 1 | 1 |
| Bai1          | 11 | 2 | 0 | 2 |
| Cyth4         | 3  | 2 | 2 | 0 |
| Eif3l         | 4  | 2 | 2 | 0 |
| Cacna1i       | 8  | 2 | 1 | 1 |
| Tnrc6b        | 6  | 2 | 1 | 1 |
| Mpped1        | 5  | 2 | 1 | 1 |
| XLOC_011224   | 4  | 2 | 2 | 0 |
| Prpf40b       | 8  | 2 | 1 | 1 |
| Celsr1        | 6  | 2 | 1 | 1 |
| Cpne8         | 7  | 2 | 1 | 1 |
| Adcy6         | 12 | 2 | 1 | 1 |
| Fmnl3         | 8  | 2 | 1 | 1 |
| Faim2         | 4  | 2 | 1 | 1 |
| Nckap1l       | 3  | 2 | 2 | 0 |
| Angpt1        | 3  | 2 | 1 | 1 |
| Abcc1         | 3  | 2 | 1 | 1 |
| Pkp2          | 5  | 2 | 2 | 0 |
| Lztr1         | 7  | 2 | 1 | 1 |
| Rtp4          | 5  | 2 | 1 | 1 |
| Osbp11        | 4  | 2 | 1 | 1 |
| Snx4          | 8  | 2 | 0 | 2 |
| Robo1         | 8  | 2 | 0 | 2 |
| Chaf1b        | 6  | 2 | 1 | 1 |
| Crebbp        | 7  | 2 | 0 | 2 |
| Parn          | 7  | 2 | 0 | 2 |
| Fgd4          | 10 | 2 | 1 | 1 |
| Klhl6         | 5  | 2 | 1 | 1 |
| Slc15a2       | 9  | 2 | 0 | 2 |

|               |    |   |   |   |
|---------------|----|---|---|---|
| Tmprss7       | 7  | 2 | 1 | 1 |
| Epha6         | 5  | 2 | 1 | 1 |
| Scaf4         | 5  | 2 | 1 | 1 |
| Urb1          | 7  | 2 | 1 | 1 |
| Ppil2         | 7  | 2 | 2 | 0 |
| Liph          | 4  | 2 | 2 | 0 |
| Ddx11         | 8  | 2 | 1 | 1 |
| Crim1         | 8  | 2 | 1 | 1 |
| Foxn2         | 4  | 2 | 1 | 1 |
| Pisd-ps2      | 9  | 2 | 2 | 0 |
| Prdm9         | 11 | 2 | 1 | 1 |
| Tbc1d24       | 10 | 2 | 1 | 1 |
| Brd4          | 8  | 2 | 1 | 1 |
| Akap8l        | 10 | 2 | 1 | 1 |
| Zfp101        | 7  | 2 | 1 | 1 |
| Abcf1         | 4  | 2 | 1 | 1 |
| Tgif1         | 5  | 2 | 2 | 0 |
| Srd5a2        | 3  | 2 | 1 | 1 |
| Eif2ak2       | 5  | 2 | 1 | 1 |
| Slc8a1        | 7  | 2 | 1 | 1 |
| Srbd1         | 5  | 2 | 1 | 1 |
| Greb1l        | 7  | 2 | 1 | 1 |
| Camk4         | 7  | 2 | 1 | 1 |
| Slc12a2       | 6  | 2 | 1 | 1 |
| St8sia3       | 5  | 2 | 2 | 0 |
| Smad2         | 4  | 2 | 0 | 2 |
| Rtnn          | 14 | 2 | 1 | 1 |
| Cdh2          | 6  | 2 | 2 | 0 |
| Nol4          | 9  | 2 | 1 | 1 |
| Pcdh1         | 8  | 2 | 1 | 1 |
| Slc6a7        | 5  | 2 | 1 | 1 |
| Zfp407        | 4  | 2 | 1 | 1 |
| Colec12       | 3  | 2 | 1 | 1 |
| Rab3il1       | 7  | 2 | 1 | 1 |
| Aldh1a1       | 6  | 2 | 1 | 1 |
| Pten          | 10 | 2 | 0 | 2 |
| Ccnj          | 6  | 2 | 1 | 1 |
| Gbf1          | 7  | 2 | 1 | 1 |
| 1700011F14Rik | 7  | 2 | 2 | 0 |
| Gal           | 2  | 2 | 2 | 0 |
| Dpf2          | 5  | 2 | 1 | 1 |
| Plcb3         | 14 | 2 | 0 | 2 |
| Glis3         | 5  | 2 | 2 | 0 |
| Prkg1         | 7  | 2 | 1 | 1 |
| Asah2         | 7  | 2 | 0 | 2 |
| Pcgf6         | 6  | 2 | 2 | 0 |
| Mrc1          | 2  | 2 | 2 | 0 |

|          |    |   |   |   |
|----------|----|---|---|---|
| Mllt10   | 7  | 2 | 1 | 1 |
| Lamc3    | 5  | 2 | 1 | 1 |
| Arhgap15 | 7  | 2 | 0 | 2 |
| Fmnl2    | 7  | 2 | 1 | 1 |
| Upp2     | 16 | 2 | 1 | 1 |
| Klhl23   | 5  | 2 | 1 | 1 |
| Dcaf17   | 6  | 2 | 1 | 1 |
| Mavs     | 8  | 2 | 1 | 1 |
| MacroD2  | 17 | 2 | 1 | 1 |
| Rin2     | 8  | 2 | 1 | 1 |
| Nsfl1c   | 7  | 2 | 0 | 2 |
| Procr    | 4  | 2 | 2 | 0 |
| Ralgapb  | 6  | 2 | 1 | 1 |
| Stx16    | 5  | 2 | 1 | 1 |
| Slco4a1  | 8  | 2 | 1 | 1 |
| Nebi     | 10 | 2 | 1 | 1 |
| Ehmt1    | 12 | 2 | 1 | 1 |
| Phpt1    | 4  | 2 | 1 | 1 |
| Ccdc148  | 5  | 2 | 1 | 1 |
| Scn3a    | 10 | 2 | 0 | 2 |
| Ctnnd1   | 9  | 2 | 1 | 1 |
| Hdc      | 5  | 2 | 2 | 0 |
| Pak7     | 6  | 2 | 1 | 1 |
| Flrt3    | 2  | 2 | 2 | 0 |
| Kif16b   | 7  | 2 | 1 | 1 |
| Ralgapa2 | 5  | 2 | 1 | 1 |
| Hrh3     | 9  | 2 | 1 | 1 |
| Chrna4   | 2  | 2 | 1 | 1 |
| Dynlrb1  | 5  | 2 | 1 | 1 |
| Car3     | 3  | 2 | 2 | 0 |
| Egfem1   | 13 | 2 | 0 | 2 |
| Ttc14    | 4  | 2 | 1 | 1 |
| Bbs12    | 3  | 2 | 1 | 1 |
| Cct3     | 7  | 2 | 2 | 0 |
| Shc1     | 7  | 2 | 0 | 2 |
| S100a6   | 3  | 2 | 1 | 1 |
| Ctss     | 3  | 2 | 2 | 0 |
| Ngf      | 2  | 2 | 1 | 1 |
| Dbt      | 4  | 2 | 1 | 1 |
| Ndst4    | 2  | 2 | 0 | 2 |
| Col25a1  | 6  | 2 | 1 | 1 |
| Slc39a8  | 4  | 2 | 1 | 1 |
| Mcoln2   | 11 | 2 | 2 | 0 |
| Car1     | 4  | 2 | 2 | 0 |
| Qrfpr    | 5  | 2 | 2 | 0 |
| Gria2    | 11 | 2 | 0 | 2 |
| Fcrls    | 2  | 2 | 2 | 0 |



|             |    |   |   |   |
|-------------|----|---|---|---|
| Lrig2       | 7  | 2 | 1 | 1 |
| Spata1      | 3  | 2 | 1 | 1 |
| Bmpr1b      | 10 | 2 | 1 | 1 |
| Hltf        | 6  | 2 | 2 | 0 |
| Tpm3        | 5  | 2 | 1 | 1 |
| Chd7        | 8  | 2 | 1 | 1 |
| Unc13b      | 14 | 2 | 1 | 1 |
| Tdrd7       | 3  | 2 | 1 | 1 |
| BC057079    | 6  | 2 | 0 | 2 |
| Mier1       | 8  | 2 | 1 | 1 |
| Lrp8        | 10 | 2 | 1 | 1 |
| Bai2        | 9  | 2 | 0 | 2 |
| Pum1        | 13 | 2 | 0 | 2 |
| Stmn1       | 8  | 2 | 1 | 1 |
| Ubr4        | 11 | 2 | 0 | 2 |
| Mtor        | 4  | 2 | 1 | 1 |
| XLOC_023268 | 7  | 2 | 0 | 2 |
| Ints8       | 8  | 2 | 0 | 2 |
| Zfp292      | 3  | 2 | 1 | 1 |
| Rasef       | 4  | 2 | 1 | 1 |
| Macf1       | 15 | 2 | 1 | 1 |
| Thrap3      | 15 | 2 | 1 | 1 |
| Epb4.1      | 11 | 2 | 1 | 1 |
| C1qc        | 2  | 2 | 2 | 0 |
| C1qa        | 2  | 2 | 2 | 0 |
| Pex14       | 4  | 2 | 1 | 1 |
| Per3        | 8  | 2 | 1 | 1 |
| Zbtb48      | 9  | 2 | 1 | 1 |
| Akap2       | 4  | 2 | 2 | 0 |
| Eif2c4      | 7  | 2 | 1 | 1 |
| Prdm16      | 7  | 2 | 2 | 0 |
| Depdc5      | 8  | 2 | 1 | 1 |
| Jakmip1     | 6  | 2 | 1 | 1 |
| Pgm1        | 9  | 2 | 1 | 1 |
| Ptpn13      | 10 | 2 | 1 | 1 |
| Cit         | 10 | 2 | 1 | 1 |
| Vsig10      | 4  | 2 | 1 | 1 |
| Ksr2        | 5  | 2 | 1 | 1 |
| Trrap       | 15 | 2 | 1 | 1 |
| Orc5        | 6  | 2 | 1 | 1 |
| Mll3        | 10 | 2 | 0 | 2 |
| Fam184b     | 4  | 2 | 1 | 1 |
| Epha5       | 7  | 2 | 1 | 1 |
| Prkg2       | 4  | 2 | 1 | 1 |
| Rasgef1b    | 8  | 2 | 0 | 2 |
| Lat2        | 5  | 2 | 1 | 1 |
| Gm7361      | 8  | 2 | 2 | 0 |

|             |    |   |   |   |
|-------------|----|---|---|---|
| Sh3bp2      | 6  | 2 | 1 | 1 |
| Evc         | 5  | 2 | 1 | 1 |
| XLOC_025977 | 4  | 2 | 1 | 1 |
| Cmklr1      | 3  | 2 | 1 | 1 |
| Flnc        | 3  | 2 | 2 | 0 |
| AI854703    | 11 | 2 | 1 | 1 |
| Dqx1        | 4  | 2 | 0 | 2 |
| Tgfa        | 4  | 2 | 2 | 0 |
| Cntn4       | 10 | 2 | 1 | 1 |
| Hrh1        | 5  | 2 | 1 | 1 |
| Rasgef1a    | 8  | 2 | 0 | 2 |
| Tnfrsf1a    | 4  | 2 | 2 | 0 |
| Tspan12     | 6  | 2 | 0 | 2 |
| Zfp467      | 7  | 2 | 1 | 1 |
| Hibadh      | 4  | 2 | 1 | 1 |
| Usp39       | 4  | 2 | 2 | 0 |
| Frmd4b      | 8  | 2 | 1 | 1 |
| Rad18       | 4  | 2 | 1 | 1 |
| Rimklb      | 8  | 2 | 1 | 1 |
| Leprel2     | 10 | 2 | 1 | 1 |
| Zfp444      | 6  | 2 | 2 | 0 |
| Akt2        | 14 | 2 | 2 | 0 |
| Zfp658      | 4  | 2 | 1 | 1 |
| Klk5        | 6  | 2 | 1 | 1 |
| Odz4        | 8  | 2 | 1 | 1 |
| Ppfibp2     | 9  | 2 | 1 | 1 |
| Tead1       | 6  | 2 | 1 | 1 |
| Tmem159     | 3  | 2 | 2 | 0 |
| Gdpd3       | 5  | 2 | 1 | 1 |
| Sec23ip     | 3  | 2 | 1 | 1 |
| Jakmip3     | 14 | 2 | 1 | 1 |
| Gpr123      | 4  | 2 | 0 | 2 |
| Mtg1        | 5  | 2 | 0 | 2 |
| B4galnt4    | 8  | 2 | 2 | 0 |
| Spnb4       | 13 | 2 | 1 | 1 |
| Chst8       | 4  | 2 | 1 | 1 |
| Tjp1        | 8  | 2 | 1 | 1 |
| Il16        | 6  | 2 | 1 | 1 |
| Myo7a       | 10 | 2 | 1 | 1 |
| Pik3c2a     | 7  | 2 | 1 | 1 |
| D7Ertd443e  | 10 | 2 | 0 | 2 |
| Lrdd        | 5  | 2 | 1 | 1 |
| Nadsyn1     | 10 | 2 | 1 | 1 |
| Itgam       | 5  | 2 | 2 | 0 |
| Slc20a2     | 4  | 2 | 1 | 1 |
| Rnf122      | 2  | 2 | 2 | 0 |
| 41699       | 4  | 2 | 1 | 1 |

|               |    |   |   |   |
|---------------|----|---|---|---|
| Crif1         | 7  | 2 | 2 | 0 |
| Myo9b         | 16 | 2 | 1 | 1 |
| Hook2         | 10 | 2 | 1 | 1 |
| Nod2          | 9  | 2 | 0 | 2 |
| Chd9          | 14 | 2 | 1 | 1 |
| Slc9a5        | 9  | 2 | 0 | 2 |
| Edc4          | 8  | 2 | 1 | 1 |
| Cntnap4       | 5  | 2 | 1 | 1 |
| Osgin1        | 2  | 2 | 1 | 1 |
| Klhl36        | 4  | 2 | 1 | 1 |
| Csmd1         | 14 | 2 | 1 | 1 |
| Ckap2         | 6  | 2 | 2 | 0 |
| Adam5         | 5  | 2 | 1 | 1 |
| Anxa10        | 4  | 2 | 2 | 0 |
| Dcaf15        | 6  | 2 | 1 | 1 |
| Nfix          | 6  | 2 | 1 | 1 |
| Mrcl          | 10 | 2 | 1 | 1 |
| 2310061C15Rik | 4  | 2 | 1 | 1 |
| Galns         | 6  | 2 | 1 | 1 |
| Pdgd          | 5  | 2 | 0 | 2 |
| Bbs9          | 11 | 2 | 0 | 2 |
| Robo4         | 7  | 2 | 1 | 1 |
| AK014147      | 4  | 2 | 1 | 1 |
| Sema7a        | 4  | 2 | 0 | 2 |
| Cilp          | 4  | 2 | 1 | 1 |
| Myo1e         | 6  | 2 | 1 | 1 |
| Wdr72         | 3  | 2 | 0 | 2 |
| Elovl5        | 5  | 2 | 1 | 1 |
| Nckipsd       | 6  | 2 | 0 | 2 |
| Kif9          | 11 | 2 | 0 | 2 |
| Setd2         | 4  | 2 | 1 | 1 |
| Dync2h1       | 8  | 2 | 1 | 1 |
| Cntn5         | 6  | 2 | 1 | 1 |
| Rgl3          | 9  | 2 | 1 | 1 |
| Glb1l2        | 6  | 2 | 0 | 2 |
| AW551984      | 2  | 2 | 1 | 1 |
| Hmbs          | 6  | 2 | 1 | 1 |
| AK086943      | 8  | 2 | 0 | 2 |
| Zc3h12c       | 8  | 2 | 1 | 1 |
| Ddx10         | 3  | 2 | 1 | 1 |
| Arid3b        | 6  | 2 | 1 | 1 |
| Lrrc49        | 9  | 2 | 1 | 1 |
| Trip4         | 5  | 2 | 1 | 1 |
| Filip1        | 8  | 2 | 1 | 1 |
| Atrip         | 11 | 2 | 0 | 2 |
| XLOC_034775   | 4  | 2 | 1 | 1 |
| Tpbp          | 3  | 2 | 2 | 0 |

|               |    |   |   |   |
|---------------|----|---|---|---|
| Syp           | 4  | 2 | 1 | 1 |
| Lancl3        | 3  | 2 | 0 | 2 |
| Phf16         | 4  | 2 | 1 | 1 |
| Ocr1          | 6  | 2 | 0 | 2 |
| F9            | 3  | 2 | 1 | 1 |
| Atp2b3        | 9  | 2 | 1 | 1 |
| Gdpd2         | 10 | 2 | 1 | 1 |
| Ogt           | 9  | 2 | 1 | 1 |
| Tbc1d8b       | 6  | 2 | 1 | 1 |
| Col4a5        | 7  | 2 | 1 | 1 |
| Wnk3          | 3  | 2 | 1 | 1 |
| Phf8          | 8  | 2 | 1 | 1 |
| Hcfc1         | 7  | 2 | 0 | 2 |
| Prrg1         | 7  | 2 | 0 | 2 |
| Rbmy1a1       | 4  | 2 | 2 | 0 |
| Lypla1        | 2  | 1 | 0 | 1 |
| A830018L16Rik | 5  | 1 | 0 | 1 |
| AK080352      | 3  | 1 | 0 | 1 |
| Plekhb2       | 3  | 1 | 1 | 0 |
| Rpl31         | 7  | 1 | 1 | 0 |
| Map4k4        | 7  | 1 | 0 | 1 |
| Nck2          | 3  | 1 | 1 | 0 |
| Mobkl3        | 3  | 1 | 0 | 1 |
| Vwc2l         | 4  | 1 | 0 | 1 |
| Smarcal1      | 6  | 1 | 1 | 0 |
| Igfbp2        | 5  | 1 | 0 | 1 |
| Slc11a1       | 8  | 1 | 1 | 0 |
| Speg          | 14 | 1 | 0 | 1 |
| Mrpl44        | 3  | 1 | 1 | 0 |
| 9430031J16Rik | 4  | 1 | 0 | 1 |
| Rhbdd1        | 3  | 1 | 1 | 0 |
| Sp100         | 9  | 1 | 0 | 1 |
| Ptma          | 6  | 1 | 0 | 1 |
| Eif4e2        | 7  | 1 | 0 | 1 |
| Efhd1         | 2  | 1 | 1 | 0 |
| Sned1         | 5  | 1 | 1 | 0 |
| Ano7          | 1  | 1 | 1 | 0 |
| Cntnap5a      | 5  | 1 | 0 | 1 |
| En1           | 1  | 1 | 1 | 0 |
| Lemd1         | 5  | 1 | 1 | 0 |
| Rabif         | 3  | 1 | 0 | 1 |
| B3galt2       | 1  | 1 | 0 | 1 |
| Glr2          | 4  | 1 | 1 | 0 |
| Fam5c         | 4  | 1 | 1 | 0 |
| Arpc5         | 2  | 1 | 1 | 0 |
| Abl2          | 4  | 1 | 0 | 1 |
| Tnr           | 4  | 1 | 1 | 0 |

|               |    |   |   |   |
|---------------|----|---|---|---|
| Slc19a2       | 4  | 1 | 0 | 1 |
| Ildr2         | 7  | 1 | 1 | 0 |
| Arhgap30      | 4  | 1 | 1 | 0 |
| Cd48          | 1  | 1 | 1 | 0 |
| Efcab2        | 4  | 1 | 0 | 1 |
| Cnst          | 6  | 1 | 1 | 0 |
| Trp53bp2      | 3  | 1 | 0 | 1 |
| Gpatch2       | 3  | 1 | 0 | 1 |
| Ints7         | 4  | 1 | 1 | 0 |
| A330023F24Rik | 7  | 1 | 0 | 1 |
| Sntg1         | 7  | 1 | 0 | 1 |
| Slco5a1       | 7  | 1 | 0 | 1 |
| Trpa1         | 6  | 1 | 1 | 0 |
| Col19a1       | 5  | 1 | 0 | 1 |
| Prim2         | 5  | 1 | 1 | 0 |
| Ankrd23       | 4  | 1 | 1 | 0 |
| Nabp1         | 2  | 1 | 1 | 0 |
| XLOC_000678   | 5  | 1 | 0 | 1 |
| Gtf3c3        | 2  | 1 | 0 | 1 |
| Pgap1         | 3  | 1 | 0 | 1 |
| Ankrd44       | 5  | 1 | 0 | 1 |
| Hspd1         | 6  | 1 | 1 | 0 |
| Fam126b       | 5  | 1 | 1 | 0 |
| XLOC_000710   | 5  | 1 | 1 | 0 |
| ldh1          | 2  | 1 | 1 | 0 |
| Serpine2      | 3  | 1 | 1 | 0 |
| Slc19a3       | 3  | 1 | 0 | 1 |
| Per2          | 8  | 1 | 1 | 0 |
| Dtymk         | 5  | 1 | 0 | 1 |
| Bcl2          | 4  | 1 | 0 | 1 |
| Cdh19         | 7  | 1 | 1 | 0 |
| Epb4.1l5      | 13 | 1 | 1 | 0 |
| Cd55          | 7  | 1 | 0 | 1 |
| Zc3h11a       | 9  | 1 | 0 | 1 |
| Prelp         | 2  | 1 | 1 | 0 |
| Hmcn1         | 8  | 1 | 0 | 1 |
| Qsox1         | 4  | 1 | 1 | 0 |
| AK181631      | 2  | 1 | 0 | 1 |
| Rcsd1         | 2  | 1 | 0 | 1 |
| Fcgr2b        | 1  | 1 | 1 | 0 |
| Fcgr3         | 2  | 1 | 1 | 0 |
| Adss          | 3  | 1 | 1 | 0 |
| Ahctf1        | 4  | 1 | 0 | 1 |
| Enah          | 5  | 1 | 0 | 1 |
| Tgfb2         | 7  | 1 | 0 | 1 |
| Kctd3         | 6  | 1 | 0 | 1 |
| Hhat          | 12 | 1 | 0 | 1 |

|               |    |   |   |   |
|---------------|----|---|---|---|
| Tmem194b      | 4  | 1 | 0 | 1 |
| Nbeal1        | 8  | 1 | 0 | 1 |
| Sgpp2         | 4  | 1 | 1 | 0 |
| Ugt1a1        | 1  | 1 | 0 | 1 |
| Ivns1abp      | 7  | 1 | 0 | 1 |
| Batf3         | 2  | 1 | 1 | 0 |
| Zbtb37        | 4  | 1 | 1 | 0 |
| Inpp5d        | 4  | 1 | 1 | 0 |
| Pou2f1        | 6  | 1 | 1 | 0 |
| Mael          | 1  | 1 | 0 | 1 |
| C1ql2         | 1  | 1 | 1 | 0 |
| Pyhin1        | 1  | 1 | 1 | 0 |
| AI607873      | 1  | 1 | 1 | 0 |
| Rgs17         | 2  | 1 | 0 | 1 |
| Shprh         | 4  | 1 | 1 | 0 |
| Fuca2         | 3  | 1 | 0 | 1 |
| Nhsl1         | 3  | 1 | 1 | 0 |
| Sgk1          | 5  | 1 | 1 | 0 |
| Moxd1         | 4  | 1 | 0 | 1 |
| Cd164         | 6  | 1 | 0 | 1 |
| Dcbld1        | 3  | 1 | 0 | 1 |
| Hsf2          | 4  | 1 | 1 | 0 |
| Gcc2          | 4  | 1 | 1 | 0 |
| Sh3rf3        | 5  | 1 | 1 | 0 |
| Psap          | 3  | 1 | 0 | 1 |
| 4632428N05Rik | 4  | 1 | 1 | 0 |
| Jmjd1c        | 8  | 1 | 1 | 0 |
| Rhobtb1       | 7  | 1 | 1 | 0 |
| Ank3          | 10 | 1 | 1 | 0 |
| Zwint         | 2  | 1 | 1 | 0 |
| Adora2a       | 5  | 1 | 1 | 0 |
| Slc19a1       | 3  | 1 | 0 | 1 |
| Pofut2        | 3  | 1 | 1 | 0 |
| Itgb2         | 4  | 1 | 1 | 0 |
| Icosl         | 6  | 1 | 1 | 0 |
| Fstl3         | 5  | 1 | 0 | 1 |
| Gpx4          | 4  | 1 | 1 | 0 |
| Dot1l         | 8  | 1 | 1 | 0 |
| Hcfc2         | 1  | 1 | 0 | 1 |
| D10Wsu102e    | 2  | 1 | 1 | 0 |
| XLOC_002469   | 5  | 1 | 0 | 1 |
| Uhrf1bp1l     | 7  | 1 | 1 | 0 |
| Mgat4c        | 5  | 1 | 0 | 1 |
| Tmem194       | 4  | 1 | 0 | 1 |
| Pan2          | 8  | 1 | 0 | 1 |
| Cnpy2         | 4  | 1 | 1 | 0 |
| Tnfaip3       | 3  | 1 | 0 | 1 |

|               |    |   |   |   |
|---------------|----|---|---|---|
| Tbpl1         | 3  | 1 | 0 | 1 |
| AA474331      | 6  | 1 | 0 | 1 |
| Ccdc162       | 13 | 1 | 1 | 0 |
| Lin28b        | 11 | 1 | 1 | 0 |
| Man1a         | 2  | 1 | 1 | 0 |
| Unc5b         | 3  | 1 | 0 | 1 |
| Sirt1         | 3  | 1 | 1 | 0 |
| Susd2         | 7  | 1 | 1 | 0 |
| Trpm2         | 5  | 1 | 1 | 0 |
| Adamts15      | 7  | 1 | 0 | 1 |
| Mobkl2a       | 4  | 1 | 0 | 1 |
| Gng7          | 2  | 1 | 1 | 0 |
| Dram1         | 5  | 1 | 1 | 0 |
| Elk3          | 2  | 1 | 1 | 0 |
| Lrriq1        | 8  | 1 | 1 | 0 |
| Tmtc2         | 5  | 1 | 0 | 1 |
| Nav3          | 9  | 1 | 0 | 1 |
| Cpsf6         | 5  | 1 | 0 | 1 |
| Dyrk2         | 4  | 1 | 0 | 1 |
| Lemd3         | 3  | 1 | 0 | 1 |
| Mon2          | 8  | 1 | 0 | 1 |
| Os9           | 4  | 1 | 1 | 0 |
| Gli1          | 5  | 1 | 0 | 1 |
| Izumo4        | 5  | 1 | 1 | 0 |
| XLOC_002936   | 3  | 1 | 0 | 1 |
| Gstt4         | 1  | 1 | 1 | 0 |
| Gna15         | 2  | 1 | 1 | 0 |
| Gatsl3        | 4  | 1 | 0 | 1 |
| Xbp1          | 2  | 1 | 1 | 0 |
| Adcy1         | 3  | 1 | 0 | 1 |
| Asb3          | 4  | 1 | 0 | 1 |
| Fam196b       | 4  | 1 | 0 | 1 |
| Gfpt2         | 5  | 1 | 1 | 0 |
| Hnrnph1       | 9  | 1 | 0 | 1 |
| Adamts2       | 6  | 1 | 0 | 1 |
| Zcchc10       | 2  | 1 | 1 | 0 |
| Gm2a          | 2  | 1 | 0 | 1 |
| Zfp692-ps     | 9  | 1 | 0 | 1 |
| Wnt9a         | 2  | 1 | 0 | 1 |
| Dhrs7b        | 5  | 1 | 0 | 1 |
| 2410006H16Rik | 2  | 1 | 1 | 0 |
| Mmgt2         | 4  | 1 | 0 | 1 |
| Fbxw10        | 5  | 1 | 1 | 0 |
| Per1          | 7  | 1 | 1 | 0 |
| Phf23         | 8  | 1 | 1 | 0 |
| Gabarap       | 3  | 1 | 0 | 1 |
| Clec10a       | 5  | 1 | 1 | 0 |

|               |       |   |   |   |   |
|---------------|-------|---|---|---|---|
| Ywhae         |       | 7 | 1 | 1 | 0 |
| Blmh          |       | 2 | 1 | 0 | 1 |
| Slc6a4        |       | 1 | 1 | 1 | 0 |
| Adap2         |       | 5 | 1 | 1 | 0 |
| Psm11         |       | 6 | 1 | 1 | 0 |
| Ccl2          |       | 1 | 1 | 1 | 0 |
| Ccl7          |       | 1 | 1 | 1 | 0 |
| Ccl12         |       | 1 | 1 | 1 | 0 |
| Ccl8          |       | 1 | 1 | 1 | 0 |
| Lig3          |       | 6 | 1 | 1 | 0 |
| Unc45b        |       | 7 | 1 | 1 | 0 |
| Sfn5          |       | 7 | 1 | 1 | 0 |
| Gm11428       |       | 1 | 1 | 1 | 0 |
| 1110001A07Rik |       | 2 | 1 | 0 | 1 |
| Fam33a        |       | 1 | 1 | 1 | 0 |
|               | 41886 | 4 | 1 | 1 | 0 |
| Mmd           |       | 2 | 1 | 1 | 0 |
| Spag9         |       | 8 | 1 | 0 | 1 |
| Ppp1r9b       |       | 6 | 1 | 1 | 0 |
| Fam117a       |       | 3 | 1 | 1 | 0 |
| Spop          |       | 5 | 1 | 1 | 0 |
| Zfp652        |       | 6 | 1 | 1 | 0 |
| Hoxb8         |       | 2 | 1 | 0 | 1 |
| Rapgef1       |       | 3 | 1 | 0 | 1 |
| Naglu         |       | 3 | 1 | 1 | 0 |
| Psme3         |       | 5 | 1 | 1 | 0 |
| Rdm1          |       | 6 | 1 | 0 | 1 |
| Grn           |       | 2 | 1 | 1 | 0 |
| Arf2          |       | 2 | 1 | 0 | 1 |
| Mrc2          |       | 7 | 1 | 1 | 0 |
| Ace           |       | 5 | 1 | 1 | 0 |
| Sox9          |       | 2 | 1 | 1 | 0 |
| Rpl38         |       | 8 | 1 | 1 | 0 |
| Sec14l1       |       | 4 | 1 | 1 | 0 |
| Afmid         |       | 6 | 1 | 0 | 1 |
| Gaa           |       | 3 | 1 | 1 | 0 |
| Card14        |       | 6 | 1 | 1 | 0 |
| Slc25a10      |       | 3 | 1 | 1 | 0 |
| Tcn2          |       | 3 | 1 | 1 | 0 |
| Kremen1       |       | 3 | 1 | 0 | 1 |
| Polm          |       | 8 | 1 | 1 | 0 |
| Cep68         |       | 4 | 1 | 0 | 1 |
| Ahsa2         |       | 2 | 1 | 1 | 0 |
| Papolg        |       | 3 | 1 | 1 | 0 |
| Acyp2         |       | 5 | 1 | 1 | 0 |
| Zfp2          |       | 8 | 1 | 1 | 0 |
| Sec24a        |       | 6 | 1 | 1 | 0 |



|               |    |   |   |   |
|---------------|----|---|---|---|
| AK138371      | 1  | 1 | 0 | 1 |
| Tnip1         | 7  | 1 | 1 | 0 |
| Rnf187        | 7  | 1 | 1 | 0 |
| Guk1          | 3  | 1 | 1 | 0 |
| Flii          | 8  | 1 | 1 | 0 |
| Cox10         | 3  | 1 | 1 | 0 |
| Fgf11         | 4  | 1 | 1 | 0 |
| Hic1          | 2  | 1 | 1 | 0 |
| Doc2b         | 1  | 1 | 1 | 0 |
| Ksr1          | 12 | 1 | 0 | 1 |
| Omg           | 2  | 1 | 0 | 1 |
| Cct6b         | 8  | 1 | 0 | 1 |
| Ccl9          | 2  | 1 | 1 | 0 |
| Nxph3         | 3  | 1 | 1 | 0 |
| Cdk5rap3      | 5  | 1 | 1 | 0 |
| Arl5c         | 7  | 1 | 0 | 1 |
| Krt19         | 4  | 1 | 1 | 0 |
| Dhx58         | 3  | 1 | 0 | 1 |
| Meox1         | 3  | 1 | 0 | 1 |
| Map3k14       | 5  | 1 | 1 | 0 |
| Bptf          | 9  | 1 | 0 | 1 |
| XLOC_005303   | 3  | 1 | 0 | 1 |
| Trim47        | 3  | 1 | 1 | 0 |
| Rhbdf2        | 5  | 1 | 1 | 0 |
| Tha1          | 5  | 1 | 1 | 0 |
| Cbx4          | 2  | 1 | 1 | 0 |
| Cbr2          | 2  | 1 | 1 | 0 |
| Fasn          | 4  | 1 | 1 | 0 |
| Rab40b        | 4  | 1 | 0 | 1 |
| Pes1          | 7  | 1 | 0 | 1 |
| Zmynd15       | 2  | 1 | 1 | 0 |
| 1300001I01Rik | 8  | 1 | 0 | 1 |
| Skap1         | 5  | 1 | 1 | 0 |
| Npm1          | 6  | 1 | 0 | 1 |
| Slc47a1       | 9  | 1 | 0 | 1 |
| Efnb3         | 4  | 1 | 1 | 0 |
| Itga2b        | 8  | 1 | 1 | 0 |
| Gabrb2        | 2  | 1 | 0 | 1 |
| Supt4h1       | 6  | 1 | 0 | 1 |
| Wwc1          | 6  | 1 | 0 | 1 |
| Trim41        | 3  | 1 | 0 | 1 |
| Maml1         | 3  | 1 | 1 | 0 |
| 4930438A08Rik | 1  | 1 | 1 | 0 |
| Wnk4          | 1  | 1 | 1 | 0 |
| Slc16a3       | 2  | 1 | 1 | 0 |
| XLOC_004252   | 1  | 1 | 1 | 0 |
| AI662270      | 1  | 1 | 1 | 0 |

|               |    |   |   |   |
|---------------|----|---|---|---|
| Odc1          | 12 | 1 | 1 | 0 |
| Hpcal1        | 3  | 1 | 0 | 1 |
| Rrm2          | 4  | 1 | 0 | 1 |
| Etv1          | 8  | 1 | 0 | 1 |
| XLOC_006659   | 1  | 1 | 0 | 1 |
| Arhgap5       | 6  | 1 | 0 | 1 |
| Gm527         | 4  | 1 | 0 | 1 |
| Dact1         | 5  | 1 | 0 | 1 |
| Prkch         | 4  | 1 | 0 | 1 |
| Syne2         | 14 | 1 | 1 | 0 |
| Fcf1          | 6  | 1 | 0 | 1 |
| Esrrb         | 2  | 1 | 0 | 1 |
| 1810035L17Rik | 3  | 1 | 1 | 0 |
| Rin3          | 7  | 1 | 1 | 0 |
| Unc79         | 12 | 1 | 0 | 1 |
| Bdkrb2        | 3  | 1 | 1 | 0 |
| Dync1h1       | 9  | 1 | 1 | 0 |
| Inf2          | 4  | 1 | 1 | 0 |
| Tmem196       | 3  | 1 | 0 | 1 |
| Greb1         | 9  | 1 | 0 | 1 |
| Baz1a         | 9  | 1 | 1 | 0 |
| Ralgapa1      | 13 | 1 | 0 | 1 |
| AK043502      | 3  | 1 | 1 | 0 |
| 4930447C04Rik | 16 | 1 | 1 | 0 |
| XLOC_007106   | 8  | 1 | 1 | 0 |
| Entpd5        | 8  | 1 | 0 | 1 |
| Vipar         | 4  | 1 | 1 | 0 |
| BC002230      | 3  | 1 | 0 | 1 |
| Trip11        | 5  | 1 | 0 | 1 |
| Stk30         | 15 | 1 | 0 | 1 |
| Akt1          | 2  | 1 | 1 | 0 |
| abParts       | 23 | 1 | 0 | 1 |
| Atp6v1c2      | 3  | 1 | 1 | 0 |
| Zbtb25        | 9  | 1 | 1 | 0 |
| XLOC_006612   | 2  | 1 | 1 | 0 |
| Gphb5         | 2  | 1 | 1 | 0 |
| Akr1c14       | 2  | 1 | 1 | 0 |
| Larp4b        | 2  | 1 | 1 | 0 |
| Amph          | 6  | 1 | 1 | 0 |
| Zscan12       | 3  | 1 | 1 | 0 |
| BC005537      | 4  | 1 | 1 | 0 |
| Mboat1        | 5  | 1 | 1 | 0 |
| Serpib9       | 3  | 1 | 1 | 0 |
| Rreb1         | 8  | 1 | 1 | 0 |
| Hivep1        | 5  | 1 | 0 | 1 |
| lars          | 4  | 1 | 0 | 1 |
| Zfp369        | 6  | 1 | 0 | 1 |

|               |    |   |   |   |
|---------------|----|---|---|---|
| Hapln1        | 2  | 1 | 0 | 1 |
| Ap3b1         | 7  | 1 | 1 | 0 |
| Chrm3         | 3  | 1 | 1 | 0 |
| Actn2         | 6  | 1 | 1 | 0 |
| BC025054      | 11 | 1 | 1 | 0 |
| Cdkal1        | 4  | 1 | 0 | 1 |
| 9530008L14Rik | 3  | 1 | 0 | 1 |
| Tpmt          | 4  | 1 | 0 | 1 |
| Sncb          | 4  | 1 | 1 | 0 |
| Uimc1         | 8  | 1 | 1 | 0 |
| Gkap1         | 7  | 1 | 1 | 0 |
| Ctla2a        | 5  | 1 | 1 | 0 |
| Slc35d2       | 7  | 1 | 1 | 0 |
| Zfp712        | 4  | 1 | 0 | 1 |
| Zfp708        | 8  | 1 | 0 | 1 |
| Zfp595        | 3  | 1 | 1 | 0 |
| Nkd2          | 3  | 1 | 1 | 0 |
| Ahrr          | 6  | 1 | 0 | 1 |
| XLOC_008659   | 3  | 1 | 0 | 1 |
| Xrcc4         | 4  | 1 | 0 | 1 |
| Iqgap2        | 5  | 1 | 1 | 0 |
| Mccc2         | 3  | 1 | 1 | 0 |
| Ndufs4        | 4  | 1 | 0 | 1 |
| Parp8         | 10 | 1 | 0 | 1 |
| Atxn1         | 6  | 1 | 1 | 0 |
| Zfp366        | 3  | 1 | 1 | 0 |
| Zfp458        | 7  | 1 | 0 | 1 |
| Zfp58         | 4  | 1 | 1 | 0 |
| Synpr         | 7  | 1 | 0 | 1 |
| Sec24c        | 9  | 1 | 0 | 1 |
| 1700112E06Rik | 7  | 1 | 0 | 1 |
| D14Abb1e      | 7  | 1 | 0 | 1 |
| Tmem110       | 5  | 1 | 0 | 1 |
| Galnt12       | 4  | 1 | 1 | 0 |
| Ncoa4         | 2  | 1 | 0 | 1 |
| Ercc6         | 9  | 1 | 0 | 1 |
| Mmrn2         | 3  | 1 | 1 | 0 |
| Cdkn3         | 2  | 1 | 1 | 0 |
| Samd4         | 5  | 1 | 0 | 1 |
| Fbxo34        | 6  | 1 | 0 | 1 |
| Mmp14         | 3  | 1 | 1 | 0 |
| Cpne6         | 8  | 1 | 1 | 0 |
| Dcaf11        | 7  | 1 | 0 | 1 |
| Nfatc4        | 7  | 1 | 1 | 0 |
| Sacs          | 3  | 1 | 0 | 1 |
| Sox7          | 1  | 1 | 1 | 0 |
| Scara5        | 3  | 1 | 1 | 0 |

|               |    |   |   |   |
|---------------|----|---|---|---|
| Gnrh1         | 2  | 1 | 1 | 0 |
| Med4          | 4  | 1 | 0 | 1 |
| Tsc22d1       | 4  | 1 | 1 | 0 |
| Epsti1        | 2  | 1 | 1 | 0 |
| XLOC_009838   | 7  | 1 | 0 | 1 |
| Scel          | 8  | 1 | 0 | 1 |
| Gpc6          | 5  | 1 | 0 | 1 |
| Farp1         | 3  | 1 | 1 | 0 |
| Kcnk5         | 3  | 1 | 1 | 0 |
| Phf7          | 7  | 1 | 0 | 1 |
| Colq          | 2  | 1 | 0 | 1 |
| AK041587      | 2  | 1 | 1 | 0 |
| Gprin2        | 2  | 1 | 0 | 1 |
| Fam35a        | 8  | 1 | 1 | 0 |
| Nrg3          | 10 | 1 | 1 | 0 |
| Ddhd1         | 10 | 1 | 0 | 1 |
| Cnih          | 5  | 1 | 1 | 0 |
| Wdhd1         | 8  | 1 | 1 | 0 |
| Exoc5         | 7  | 1 | 0 | 1 |
| Chd8          | 8  | 1 | 1 | 0 |
| Cma1          | 1  | 1 | 1 | 0 |
| Setdb2        | 7  | 1 | 1 | 0 |
| Mtmr9         | 3  | 1 | 0 | 1 |
| Fzd3          | 3  | 1 | 0 | 1 |
| Nefm          | 6  | 1 | 0 | 1 |
| Gtf2f2        | 2  | 1 | 1 | 0 |
| Naa16         | 7  | 1 | 0 | 1 |
| Diap3         | 6  | 1 | 0 | 1 |
| Spry2         | 3  | 1 | 1 | 0 |
| Tgds          | 7  | 1 | 1 | 0 |
| Dock9         | 14 | 1 | 0 | 1 |
| 1300010F03Rik | 4  | 1 | 0 | 1 |
| Itgbl1        | 3  | 1 | 1 | 0 |
| Gnpnat1       | 4  | 1 | 1 | 0 |
| Zfp219        | 4  | 1 | 1 | 0 |
| Mcpt4         | 1  | 1 | 1 | 0 |
| Klhl1         | 2  | 1 | 1 | 0 |
| Syt15         | 4  | 1 | 1 | 0 |
| Olfm4         | 4  | 1 | 1 | 0 |
| Prss51        | 1  | 1 | 1 | 0 |
| AK136126      | 4  | 1 | 1 | 0 |
| Rictor        | 5  | 1 | 0 | 1 |
| Spag1         | 6  | 1 | 0 | 1 |
| Baalc         | 3  | 1 | 0 | 1 |
| Zfpm2         | 4  | 1 | 0 | 1 |
| Oxr1          | 7  | 1 | 1 | 0 |
| Wdr67         | 15 | 1 | 0 | 1 |

|          |       |    |   |   |   |
|----------|-------|----|---|---|---|
| Pvt1     |       | 12 | 1 | 1 | 0 |
| Zfp623   |       | 4  | 1 | 0 | 1 |
| Lgals1   |       | 5  | 1 | 1 | 0 |
| Triobp   |       | 5  | 1 | 1 | 0 |
| Gm10863  |       | 5  | 1 | 1 | 0 |
| Tomm22   |       | 3  | 1 | 0 | 1 |
| Tab1     |       | 3  | 1 | 1 | 0 |
| Mchr1    |       | 2  | 1 | 1 | 0 |
| Tef      |       | 6  | 1 | 0 | 1 |
| Aco2     |       | 4  | 1 | 1 | 0 |
|          | 41885 | 5  | 1 | 0 | 1 |
| Pnpla3   |       | 2  | 1 | 0 | 1 |
| Parvg    |       | 3  | 1 | 0 | 1 |
| Prr5     |       | 5  | 1 | 0 | 1 |
| Pim3     |       | 4  | 1 | 0 | 1 |
| Adm2     |       | 1  | 1 | 1 | 0 |
| Gm4371   |       | 6  | 1 | 0 | 1 |
| Smarcd1  |       | 4  | 1 | 0 | 1 |
| Atf1     |       | 4  | 1 | 1 | 0 |
| Nipbl    |       | 4  | 1 | 1 | 0 |
| Fam105b  |       | 5  | 1 | 0 | 1 |
| Nipal2   |       | 3  | 1 | 0 | 1 |
| Ext1     |       | 3  | 1 | 1 | 0 |
| Fbxo32   |       | 2  | 1 | 0 | 1 |
| Lrrc6    |       | 3  | 1 | 0 | 1 |
| Sla      |       | 3  | 1 | 1 | 0 |
| Zfat     |       | 6  | 1 | 1 | 0 |
| Tonsl    |       | 2  | 1 | 1 | 0 |
| Arhgap39 |       | 10 | 1 | 1 | 0 |
| Apol8    |       | 3  | 1 | 0 | 1 |
| Foxred2  |       | 4  | 1 | 0 | 1 |
| Ift27    |       | 3  | 1 | 0 | 1 |
| Baiap2l2 |       | 5  | 1 | 1 | 0 |
| Pdgfb    |       | 6  | 1 | 0 | 1 |
| Mkl1     |       | 3  | 1 | 1 | 0 |
| Tob2     |       | 3  | 1 | 0 | 1 |
| Arfgap3  |       | 4  | 1 | 0 | 1 |
| Ttll12   |       | 5  | 1 | 1 | 0 |
| AK006138 |       | 1  | 1 | 0 | 1 |
| Prickle1 |       | 6  | 1 | 1 | 0 |
| Scaf11   |       | 5  | 1 | 0 | 1 |
| Rapgef3  |       | 6  | 1 | 1 | 0 |
| Zfp641   |       | 9  | 1 | 1 | 0 |
| Rnd1     |       | 1  | 1 | 1 | 0 |
| Racgap1  |       | 7  | 1 | 0 | 1 |
| Smug1    |       | 2  | 1 | 0 | 1 |
| Elm1     |       | 1  | 1 | 1 | 0 |

|               |    |   |   |   |
|---------------|----|---|---|---|
| Csdc2         | 2  | 1 | 1 | 0 |
| Skp2          | 6  | 1 | 0 | 1 |
| Dgat1         | 4  | 1 | 1 | 0 |
| Fer1l6        | 2  | 1 | 1 | 0 |
| Wisp1         | 3  | 1 | 1 | 0 |
| Scube1        | 5  | 1 | 1 | 0 |
| Sec14l5       | 9  | 1 | 1 | 0 |
| Snx29         | 6  | 1 | 1 | 0 |
| Snai2         | 5  | 1 | 1 | 0 |
| Top3b         | 4  | 1 | 0 | 1 |
| Aifm3         | 8  | 1 | 0 | 1 |
| Dvl3          | 5  | 1 | 0 | 1 |
| Psmc2         | 5  | 1 | 1 | 0 |
| Vps8          | 7  | 1 | 0 | 1 |
| Hrasl5        | 4  | 1 | 0 | 1 |
| Bdh1          | 4  | 1 | 1 | 0 |
| Dlg1          | 12 | 1 | 0 | 1 |
| Ubxn7         | 3  | 1 | 1 | 0 |
| Itgb5         | 3  | 1 | 1 | 0 |
| Mylk          | 8  | 1 | 1 | 0 |
| Ptplb         | 6  | 1 | 0 | 1 |
| Sema5b        | 4  | 1 | 0 | 1 |
| Popdc2        | 3  | 1 | 0 | 1 |
| Tmem39a       | 12 | 1 | 1 | 0 |
| 2610015P09Rik | 6  | 1 | 1 | 0 |
| Retnlg        | 1  | 1 | 0 | 1 |
| AK090163      | 5  | 1 | 0 | 1 |
| 4931408A02Rik | 8  | 1 | 0 | 1 |
| Ifnar1        | 5  | 1 | 0 | 1 |
| Ifngr2        | 2  | 1 | 1 | 0 |
| Cbr1          | 4  | 1 | 0 | 1 |
| Slx4          | 10 | 1 | 0 | 1 |
| Tcfap4        | 4  | 1 | 1 | 0 |
| Fam100a       | 4  | 1 | 0 | 1 |
| Emp2          | 2  | 1 | 1 | 0 |
| Dexi          | 4  | 1 | 0 | 1 |
| Myh11         | 5  | 1 | 1 | 0 |
| Ube2l3        | 7  | 1 | 1 | 0 |
| Parl          | 4  | 1 | 0 | 1 |
| Igf2bp2       | 8  | 1 | 1 | 0 |
| Tbccd1        | 7  | 1 | 0 | 1 |
| Lsg1          | 3  | 1 | 1 | 0 |
| Cd86          | 1  | 1 | 1 | 0 |
| Fbxo40        | 2  | 1 | 0 | 1 |
| Cd96          | 6  | 1 | 1 | 0 |
| 5330426P16Rik | 6  | 1 | 1 | 0 |
| Rg9mtd1       | 2  | 1 | 1 | 0 |

|             |    |   |   |   |
|-------------|----|---|---|---|
| Cadm2       | 6  | 1 | 0 | 1 |
| Samsn1      | 4  | 1 | 1 | 0 |
| Mrpl39      | 8  | 1 | 0 | 1 |
| Tiam1       | 4  | 1 | 0 | 1 |
| Erg         | 5  | 1 | 0 | 1 |
| Ripk4       | 4  | 1 | 0 | 1 |
| Pigz        | 1  | 1 | 0 | 1 |
| Gramd1c     | 6  | 1 | 0 | 1 |
| Ppp1r2      | 3  | 1 | 0 | 1 |
| XLOC_012964 | 2  | 1 | 1 | 0 |
| XLOC_013763 | 5  | 1 | 1 | 0 |
| Park2       | 5  | 1 | 0 | 1 |
| Tcp1        | 4  | 1 | 0 | 1 |
| Zfp943      | 3  | 1 | 1 | 0 |
| Narfl       | 2  | 1 | 0 | 1 |
| Fance       | 10 | 1 | 1 | 0 |
| Tbc1d22b    | 2  | 1 | 1 | 0 |
| Rrp1b       | 8  | 1 | 1 | 0 |
| Myo1f       | 5  | 1 | 1 | 0 |
| Ndufa7      | 6  | 1 | 0 | 1 |
| Rgl2        | 7  | 1 | 0 | 1 |
| Tnxb        | 11 | 1 | 1 | 0 |
| Abhd16a     | 3  | 1 | 0 | 1 |
| Atp6v1g2    | 5  | 1 | 0 | 1 |
| Cchr1       | 4  | 1 | 1 | 0 |
| Nfkbie      | 2  | 1 | 1 | 0 |
| Trem2       | 2  | 1 | 1 | 0 |
| Kdm4b       | 8  | 1 | 0 | 1 |
| Vav1        | 3  | 1 | 1 | 0 |
| Emr1        | 4  | 1 | 1 | 0 |
| Cntnap5c    | 9  | 1 | 0 | 1 |
| L3mbtl4     | 14 | 1 | 0 | 1 |
| Fam179a     | 11 | 1 | 1 | 0 |
| Rasgrp3     | 4  | 1 | 0 | 1 |
| Galm        | 5  | 1 | 0 | 1 |
| Ppm1b       | 4  | 1 | 0 | 1 |
| Tmem181c-ps | 4  | 1 | 0 | 1 |
| Gm16052     | 4  | 1 | 1 | 0 |
| Dact2       | 3  | 1 | 1 | 0 |
| Abca17      | 5  | 1 | 0 | 1 |
| Fam173a     | 5  | 1 | 1 | 0 |
| Rhot2       | 7  | 1 | 0 | 1 |
| Bak1        | 6  | 1 | 1 | 0 |
| Fkbp5       | 4  | 1 | 0 | 1 |
| Notch3      | 13 | 1 | 1 | 0 |
| Zfp870      | 4  | 1 | 0 | 1 |
| H2-K1       | 3  | 1 | 0 | 1 |

|               |    |   |   |   |
|---------------|----|---|---|---|
| C2            | 4  | 1 | 0 | 1 |
| Aif1          | 3  | 1 | 1 | 0 |
| Vars2         | 6  | 1 | 1 | 0 |
| Spats1        | 7  | 1 | 1 | 0 |
| Capn11        | 6  | 1 | 0 | 1 |
| Klhdc3        | 7  | 1 | 0 | 1 |
| Slc5a7        | 4  | 1 | 1 | 0 |
| Pot1b         | 8  | 1 | 1 | 0 |
| Sema6b        | 4  | 1 | 1 | 0 |
| Gtf2f1        | 5  | 1 | 1 | 0 |
| Dennd1c       | 10 | 1 | 0 | 1 |
| Fbxl17        | 5  | 1 | 1 | 0 |
| 1110012J17Rik | 6  | 1 | 0 | 1 |
| Atl2          | 4  | 1 | 0 | 1 |
| Cdkl4         | 3  | 1 | 0 | 1 |
| XLOC_013764   | 2  | 1 | 0 | 1 |
| Rxrb          | 4  | 1 | 1 | 0 |
| Zfp119b       | 2  | 1 | 0 | 1 |
| Tpsb2         | 1  | 1 | 1 | 0 |
| Tnfaip8l1     | 2  | 1 | 1 | 0 |
| Cfb           | 3  | 1 | 1 | 0 |
| Svil          | 9  | 1 | 0 | 1 |
| Mib1          | 2  | 1 | 0 | 1 |
| Lama3         | 11 | 1 | 1 | 0 |
| Rnf138        | 4  | 1 | 0 | 1 |
| Zfp35         | 3  | 1 | 1 | 0 |
| Galnt1        | 3  | 1 | 1 | 0 |
| Egr1          | 2  | 1 | 1 | 0 |
| Paip2         | 2  | 1 | 1 | 0 |
| XLOC_015716   | 3  | 1 | 0 | 1 |
| Eif1a         | 2  | 1 | 0 | 1 |
| Snx2          | 4  | 1 | 1 | 0 |
| Cd74          | 3  | 1 | 1 | 0 |
| Wdr7          | 3  | 1 | 0 | 1 |
| XLOC_015798   | 3  | 1 | 1 | 0 |
| Malt1         | 6  | 1 | 1 | 0 |
| Grp           | 2  | 1 | 1 | 0 |
| Seh1l         | 6  | 1 | 0 | 1 |
| Mex3c         | 2  | 1 | 0 | 1 |
| Pias2         | 5  | 1 | 1 | 0 |
| St8sia5       | 6  | 1 | 0 | 1 |
| Zfp438        | 5  | 1 | 1 | 0 |
| Gm10125       | 6  | 1 | 1 | 0 |
| Mpp7          | 5  | 1 | 1 | 0 |
| Brd8          | 4  | 1 | 0 | 1 |
| Tmem173       | 2  | 1 | 1 | 0 |
| Diap1         | 9  | 1 | 1 | 0 |



|               |    |   |   |   |
|---------------|----|---|---|---|
| XLOC_015973   | 4  | 1 | 0 | 1 |
| XLOC_015975   | 3  | 1 | 1 | 0 |
| Pcdh12        | 2  | 1 | 1 | 0 |
| Dtwd2         | 5  | 1 | 0 | 1 |
| Zfp608        | 6  | 1 | 1 | 0 |
| C330018D20Rik | 3  | 1 | 0 | 1 |
| Tcof1         | 4  | 1 | 0 | 1 |
| Cep76         | 4  | 1 | 0 | 1 |
| Poli          | 7  | 1 | 0 | 1 |
| RP24-263P17.1 | 4  | 1 | 0 | 1 |
| Galr1         | 2  | 1 | 1 | 0 |
| Fhod3         | 3  | 1 | 1 | 0 |
| AW554918      | 5  | 1 | 0 | 1 |
| Ankhd1        | 7  | 1 | 0 | 1 |
| Myo5b         | 8  | 1 | 0 | 1 |
| XLOC_015852   | 3  | 1 | 0 | 1 |
| XLOC_015807   | 4  | 1 | 1 | 0 |
| Acy3          | 3  | 1 | 0 | 1 |
| Clcf1         | 8  | 1 | 1 | 0 |
| Ctsf          | 2  | 1 | 1 | 0 |
| Rin1          | 6  | 1 | 1 | 0 |
| Map3k11       | 4  | 1 | 0 | 1 |
| Atg2a         | 6  | 1 | 1 | 0 |
| Nrxn2         | 9  | 1 | 0 | 1 |
| Ms4a6c        | 3  | 1 | 1 | 0 |
| Ms4a6b        | 2  | 1 | 1 | 0 |
| Mpeg1         | 1  | 1 | 1 | 0 |
| Fam111a       | 1  | 1 | 1 | 0 |
| Smarca2       | 10 | 1 | 1 | 0 |
| Lipk          | 3  | 1 | 1 | 0 |
| Fas           | 3  | 1 | 0 | 1 |
| Cyp26a1       | 4  | 1 | 1 | 0 |
| Hells         | 8  | 1 | 0 | 1 |
| As3mt         | 3  | 1 | 1 | 0 |
| Adra2a        | 2  | 1 | 1 | 0 |
| Tcf7l2        | 12 | 1 | 1 | 0 |
| Nhlrc2        | 2  | 1 | 0 | 1 |
| Pnliprp2      | 3  | 1 | 1 | 0 |
| Kcnk18        | 2  | 1 | 1 | 0 |
| Aldh3b1       | 4  | 1 | 0 | 1 |
| Tmem151a      | 5  | 1 | 0 | 1 |
| Pacs1         | 4  | 1 | 1 | 0 |
| Sipa1         | 7  | 1 | 1 | 0 |
| Frmd8         | 2  | 1 | 1 | 0 |
| Flrt1         | 2  | 1 | 0 | 1 |
| Cox8a         | 2  | 1 | 1 | 0 |
| Tmem216       | 4  | 1 | 0 | 1 |

|               |    |   |   |   |
|---------------|----|---|---|---|
| Ms4a7         | 2  | 1 | 1 | 0 |
| Ms4a6d        | 1  | 1 | 1 | 0 |
| Mamdc2        | 4  | 1 | 0 | 1 |
| Slc16a12      | 4  | 1 | 1 | 0 |
| Ppp1r3c       | 2  | 1 | 0 | 1 |
| Pyroxd2       | 9  | 1 | 0 | 1 |
| Sec31b        | 6  | 1 | 0 | 1 |
| Arl3          | 3  | 1 | 1 | 0 |
| Csf2ra        | 16 | 1 | 0 | 1 |
| Ndufv1        | 2  | 1 | 1 | 0 |
| Pik3ap1       | 6  | 1 | 1 | 0 |
| Unc93b1       | 3  | 1 | 1 | 0 |
| Cep55         | 3  | 1 | 0 | 1 |
| Tmem180       | 4  | 1 | 1 | 0 |
| Ccdc88b       | 8  | 1 | 0 | 1 |
| Ankrd1        | 1  | 1 | 1 | 0 |
| Bend7         | 8  | 1 | 1 | 0 |
| Sephs1        | 5  | 1 | 0 | 1 |
| Ccdc3         | 1  | 1 | 1 | 0 |
| Itih5         | 2  | 1 | 1 | 0 |
| Il15ra        | 9  | 1 | 0 | 1 |
| Thns1         | 4  | 1 | 0 | 1 |
| Psd4          | 4  | 1 | 1 | 0 |
| Fbxw5         | 5  | 1 | 0 | 1 |
| St6galnac6    | 8  | 1 | 1 | 0 |
| Rif1          | 10 | 1 | 0 | 1 |
| Plekha3       | 5  | 1 | 1 | 0 |
| Ypel4         | 3  | 1 | 0 | 1 |
| Sfpi1         | 4  | 1 | 1 | 0 |
| Ccdc34        | 3  | 1 | 1 | 0 |
| Spred1        | 2  | 1 | 0 | 1 |
| Thbs1         | 5  | 1 | 0 | 1 |
| Mapkbp1       | 7  | 1 | 1 | 0 |
| Wdr76         | 4  | 1 | 0 | 1 |
| Ctdspl2       | 10 | 1 | 1 | 0 |
| Eif3j         | 5  | 1 | 0 | 1 |
| Fgf7          | 5  | 1 | 1 | 0 |
| Dtwd1         | 6  | 1 | 0 | 1 |
| Csrp2bp       | 4  | 1 | 1 | 0 |
| Plk1s1        | 3  | 1 | 1 | 0 |
| Tmem90b       | 4  | 1 | 0 | 1 |
| 2310046K01Rik | 2  | 1 | 0 | 1 |
| Scrt2         | 4  | 1 | 0 | 1 |
| Srxn1         | 2  | 1 | 1 | 0 |
| BC020535      | 8  | 1 | 0 | 1 |
| U46068        | 4  | 1 | 0 | 1 |
| Raly          | 8  | 1 | 1 | 0 |

|               |    |   |   |   |
|---------------|----|---|---|---|
| Dlgap4        | 5  | 1 | 1 | 0 |
| Lbp           | 2  | 1 | 1 | 0 |
| Ppp1r16b      | 2  | 1 | 0 | 1 |
| Fam83d        | 3  | 1 | 0 | 1 |
| Plcg1         | 6  | 1 | 0 | 1 |
| 9430021M05Rik | 9  | 1 | 0 | 1 |
| L3mbtl        | 13 | 1 | 1 | 0 |
| Gdap11l       | 4  | 1 | 1 | 0 |
| Ywhab         | 5  | 1 | 1 | 0 |
| Myt1          | 14 | 1 | 1 | 0 |
| Taf3          | 2  | 1 | 1 | 0 |
| Hnmt          | 2  | 1 | 0 | 1 |
| A830007P12Rik | 3  | 1 | 1 | 0 |
| Traf2         | 4  | 1 | 1 | 0 |
| Notch1        | 5  | 1 | 1 | 0 |
| Agpat2        | 5  | 1 | 1 | 0 |
| Fam163b       | 3  | 1 | 0 | 1 |
| Sardh         | 4  | 1 | 0 | 1 |
| Ccbl1         | 8  | 1 | 0 | 1 |
| 1700001O22Rik | 7  | 1 | 0 | 1 |
| Fibcd1        | 2  | 1 | 0 | 1 |
| Fpgs          | 2  | 1 | 0 | 1 |
| Cdk9          | 6  | 1 | 0 | 1 |
| Stxbp1        | 2  | 1 | 1 | 0 |
| Psmb7         | 3  | 1 | 1 | 0 |
| Nr6a1         | 7  | 1 | 0 | 1 |
| Golga1        | 5  | 1 | 0 | 1 |
| Gtdc1         | 3  | 1 | 0 | 1 |
| Neb           | 9  | 1 | 0 | 1 |
| Slc38a11      | 7  | 1 | 0 | 1 |
| Sp3           | 5  | 1 | 0 | 1 |
| 1110051M20Rik | 4  | 1 | 1 | 0 |
| Ldlrad3       | 4  | 1 | 1 | 0 |
| D430041D05Rik | 10 | 1 | 0 | 1 |
| Eif3m         | 4  | 1 | 1 | 0 |
| Mett5d1       | 4  | 1 | 1 | 0 |
| Arhgap11a     | 3  | 1 | 0 | 1 |
| Gjd2          | 1  | 1 | 0 | 1 |
| Zfp770        | 2  | 1 | 0 | 1 |
| Bmf           | 4  | 1 | 1 | 0 |
| Tgm5          | 7  | 1 | 1 | 0 |
| Mfap1a        | 6  | 1 | 0 | 1 |
| Spg11         | 7  | 1 | 0 | 1 |
| Patl2         | 2  | 1 | 0 | 1 |
| Bambi-ps1     | 1  | 1 | 1 | 0 |
| Zfp661        | 5  | 1 | 1 | 0 |
| Gm14025       | 2  | 1 | 0 | 1 |

|               |    |   |   |   |
|---------------|----|---|---|---|
| Il1b          | 1  | 1 | 1 | 0 |
| Hao1          | 1  | 1 | 1 | 0 |
| Gm14066       | 6  | 1 | 0 | 1 |
| Bfsp1         | 6  | 1 | 0 | 1 |
| Ahcy          | 5  | 1 | 1 | 0 |
| D630003M21Rik | 6  | 1 | 1 | 0 |
| Sdc4          | 3  | 1 | 1 | 0 |
| Wfdc3         | 3  | 1 | 1 | 0 |
| Cdh22         | 3  | 1 | 1 | 0 |
| Zfp663        | 4  | 1 | 0 | 1 |
| Prex1         | 7  | 1 | 1 | 0 |
| Fam65c        | 7  | 1 | 0 | 1 |
| Kcng1         | 2  | 1 | 1 | 0 |
| Zfp217        | 3  | 1 | 1 | 0 |
| Ythdf1        | 4  | 1 | 0 | 1 |
| Gm347         | 5  | 1 | 0 | 1 |
| BC027685      | 1  | 1 | 1 | 0 |
| Serf2         | 2  | 1 | 0 | 1 |
| Exd1          | 5  | 1 | 0 | 1 |
| Spint1        | 4  | 1 | 1 | 0 |
| 2310003F16Rik | 3  | 1 | 1 | 0 |
| Ankrd5        | 1  | 1 | 0 | 1 |
| Gm14246       | 3  | 1 | 0 | 1 |
| Fbn1          | 7  | 1 | 0 | 1 |
| Eif2s2        | 5  | 1 | 0 | 1 |
| Gm13399       | 3  | 1 | 1 | 0 |
| Entpd2        | 2  | 1 | 1 | 0 |
| Prnd          | 1  | 1 | 1 | 0 |
| Cyp24a1       | 1  | 1 | 1 | 0 |
| Raly1         | 9  | 1 | 1 | 0 |
| Tnfsf10       | 5  | 1 | 1 | 0 |
| Pld1          | 11 | 1 | 1 | 0 |
| Kcnmb2        | 4  | 1 | 0 | 1 |
| Sox2ot        | 7  | 1 | 1 | 0 |
| Postn         | 5  | 1 | 1 | 0 |
| Med12l        | 10 | 1 | 1 | 0 |
| Kcnab1        | 6  | 1 | 1 | 0 |
| Ptx3          | 4  | 1 | 1 | 0 |
| lqcj-schip1   | 3  | 1 | 1 | 0 |
| Ctso          | 2  | 1 | 1 | 0 |
| Pbxip1        | 5  | 1 | 0 | 1 |
| Adar          | 4  | 1 | 1 | 0 |
| Gatad2b       | 3  | 1 | 0 | 1 |
| S100a11       | 3  | 1 | 1 | 0 |
| S100a10       | 5  | 1 | 1 | 0 |
| Anp32e        | 3  | 1 | 0 | 1 |
| Ankrd35       | 3  | 1 | 1 | 0 |

|               |    |   |   |   |
|---------------|----|---|---|---|
| Fmo5          | 6  | 1 | 1 | 0 |
| Nhlh2         | 4  | 1 | 1 | 0 |
| XLOC_021076   | 7  | 1 | 1 | 0 |
| Dpyd          | 3  | 1 | 0 | 1 |
| Prss12        | 3  | 1 | 1 | 0 |
| 4930422G04Rik | 11 | 1 | 0 | 1 |
| Tifa          | 4  | 1 | 1 | 0 |
| Cfi           | 3  | 1 | 1 | 0 |
| Cxxc4         | 3  | 1 | 0 | 1 |
| Nhedc2        | 8  | 1 | 0 | 1 |
| Manba         | 6  | 1 | 0 | 1 |
| Unc5c         | 2  | 1 | 0 | 1 |
| Gbp2          | 2  | 1 | 0 | 1 |
| Odf2l         | 12 | 1 | 1 | 0 |
| Lpar3         | 7  | 1 | 0 | 1 |
| Ctbs          | 4  | 1 | 1 | 0 |
| Pigk          | 5  | 1 | 0 | 1 |
| Il7           | 7  | 1 | 1 | 0 |
| Pde7a         | 4  | 1 | 0 | 1 |
| Crh           | 3  | 1 | 1 | 0 |
| Cpb1          | 9  | 1 | 0 | 1 |
| Frem2         | 5  | 1 | 1 | 0 |
| Golim4        | 4  | 1 | 1 | 0 |
| Lrat          | 2  | 1 | 1 | 0 |
| Tlr2          | 3  | 1 | 1 | 0 |
| Prcc          | 4  | 1 | 1 | 0 |
| Fdps          | 12 | 1 | 1 | 0 |
| 2500003M10Rik | 9  | 1 | 0 | 1 |
| S100a9        | 2  | 1 | 0 | 1 |
| Sprr1a        | 1  | 1 | 1 | 0 |
| Scnm1         | 5  | 1 | 0 | 1 |
| Fcgr1         | 1  | 1 | 1 | 0 |
| Nudt17        | 2  | 1 | 1 | 0 |
| Cd53          | 2  | 1 | 1 | 0 |
| Fam40a        | 6  | 1 | 1 | 0 |
| 4933431E20Rik | 3  | 1 | 0 | 1 |
| Celsr2        | 5  | 1 | 1 | 0 |
| Stxbp3a       | 3  | 1 | 1 | 0 |
| Rwdd3         | 5  | 1 | 0 | 1 |
| Larp7         | 4  | 1 | 0 | 1 |
| Aimp1         | 3  | 1 | 0 | 1 |
| Nfkb1         | 2  | 1 | 0 | 1 |
| Hs2st1        | 3  | 1 | 1 | 0 |
| Lphn2         | 13 | 1 | 1 | 0 |
| Ptgfr         | 4  | 1 | 0 | 1 |
| St6galnac3    | 4  | 1 | 1 | 0 |
| Fam48a        | 5  | 1 | 0 | 1 |

|               |    |   |   |   |
|---------------|----|---|---|---|
| S100a8        | 1  | 1 | 0 | 1 |
| Adh7          | 2  | 1 | 1 | 0 |
| Prr9          | 1  | 1 | 1 | 0 |
| P2ry13        | 1  | 1 | 0 | 1 |
| Trim59        | 2  | 1 | 1 | 0 |
| XLOC_020782   | 4  | 1 | 1 | 0 |
| Sprr2j-ps     | 1  | 1 | 1 | 0 |
| XLOC_020987   | 1  | 1 | 1 | 0 |
| Uox           | 1  | 1 | 1 | 0 |
| Clca3         | 2  | 1 | 1 | 0 |
| Lelp1         | 1  | 1 | 1 | 0 |
| 4930412C18Rik | 12 | 1 | 1 | 0 |
| Tmem55a       | 3  | 1 | 1 | 0 |
| Tmod1         | 4  | 1 | 0 | 1 |
| Tgfbr1        | 5  | 1 | 0 | 1 |
| Smc2          | 6  | 1 | 1 | 0 |
| Palm2         | 3  | 1 | 0 | 1 |
| Zfp618        | 8  | 1 | 0 | 1 |
| Col27a1       | 12 | 1 | 1 | 0 |
| Acer2         | 6  | 1 | 0 | 1 |
| Fggy          | 8  | 1 | 0 | 1 |
| Usp24         | 6  | 1 | 1 | 0 |
| Slc1a7        | 3  | 1 | 1 | 0 |
| Mobkl2c       | 4  | 1 | 0 | 1 |
| Mknk1         | 7  | 1 | 0 | 1 |
| Ipp           | 3  | 1 | 1 | 0 |
| Eif2b3        | 2  | 1 | 1 | 0 |
| Pabpc4        | 12 | 1 | 1 | 0 |
| Rspo1         | 2  | 1 | 1 | 0 |
| Oscp1         | 4  | 1 | 0 | 1 |
| Marcksl1      | 2  | 1 | 1 | 0 |
| Map3k6        | 4  | 1 | 1 | 0 |
| Gpatch3       | 4  | 1 | 0 | 1 |
| Htr1d         | 6  | 1 | 0 | 1 |
| Wnt4          | 2  | 1 | 1 | 0 |
| Eif4g3        | 15 | 1 | 0 | 1 |
| Pla2g2d       | 2  | 1 | 1 | 0 |
| 6330545A04Rik | 2  | 1 | 0 | 1 |
| Fam131c       | 2  | 1 | 1 | 0 |
| Zbtb17        | 4  | 1 | 1 | 0 |
| Dhrs3         | 2  | 1 | 1 | 0 |
| Gm13203       | 1  | 1 | 1 | 0 |
| Rere          | 10 | 1 | 1 | 0 |
| Ttc34         | 3  | 1 | 0 | 1 |
| 9430015G10Rik | 7  | 1 | 0 | 1 |
| Plag1         | 4  | 1 | 0 | 1 |
| Tmem67        | 6  | 1 | 1 | 0 |

|               |    |   |   |   |
|---------------|----|---|---|---|
| Slc26a7       | 3  | 1 | 0 | 1 |
| Orc3          | 7  | 1 | 1 | 0 |
| Mobkl2b       | 3  | 1 | 0 | 1 |
| Ddx58         | 3  | 1 | 1 | 0 |
| Smrp1         | 10 | 1 | 0 | 1 |
| Vcp           | 12 | 1 | 0 | 1 |
| Fancg         | 4  | 1 | 0 | 1 |
| Baat          | 1  | 1 | 0 | 1 |
| lkbkap        | 8  | 1 | 1 | 0 |
| Svep1         | 4  | 1 | 0 | 1 |
| Rod1          | 8  | 1 | 0 | 1 |
| Alad          | 2  | 1 | 1 | 0 |
| Akna          | 8  | 1 | 1 | 0 |
| Cdk5rap2      | 5  | 1 | 0 | 1 |
| Ptprd         | 10 | 1 | 0 | 1 |
| XLOC_023541   | 10 | 1 | 0 | 1 |
| Lrrc42        | 3  | 1 | 0 | 1 |
| Podn          | 4  | 1 | 1 | 0 |
| Cyp4b1        | 2  | 1 | 1 | 0 |
| Tspan1        | 2  | 1 | 0 | 1 |
| Mast2         | 7  | 1 | 0 | 1 |
| Btbd19        | 7  | 1 | 1 | 0 |
| Kif2c         | 2  | 1 | 0 | 1 |
| B4galt2       | 2  | 1 | 1 | 0 |
| Cdc20         | 3  | 1 | 0 | 1 |
| 1700029G01Rik | 7  | 1 | 0 | 1 |
| Hpca          | 3  | 1 | 0 | 1 |
| Rbbp4         | 2  | 1 | 1 | 0 |
| Hdac1         | 14 | 1 | 1 | 0 |
| Tmem39b       | 4  | 1 | 0 | 1 |
| Grhl3         | 5  | 1 | 1 | 0 |
| Ephb2         | 4  | 1 | 1 | 0 |
| Zbtb40        | 6  | 1 | 0 | 1 |
| Tmem51        | 5  | 1 | 1 | 0 |
| AK018156      | 6  | 1 | 0 | 1 |
| Tnfrsf8       | 3  | 1 | 1 | 0 |
| Ajap1         | 2  | 1 | 1 | 0 |
| 1700024P16Rik | 7  | 1 | 1 | 0 |
| Ttc22         | 4  | 1 | 0 | 1 |
| Txndc12       | 3  | 1 | 0 | 1 |
| Lrrc38        | 1  | 1 | 1 | 0 |
| Gm1987        | 6  | 1 | 0 | 1 |
| AK133010      | 2  | 1 | 1 | 0 |
| Nasp          | 2  | 1 | 1 | 0 |
| Rps8          | 9  | 1 | 0 | 1 |
| 1110065P20Rik | 1  | 1 | 1 | 0 |
| Zkscan16      | 2  | 1 | 0 | 1 |

|               |    |   |   |   |
|---------------|----|---|---|---|
| Nt5c1a        | 1  | 1 | 1 | 0 |
| Cd72          | 3  | 1 | 0 | 1 |
| Maneal        | 2  | 1 | 0 | 1 |
| AK021368      | 1  | 1 | 1 | 0 |
| Gm1060        | 6  | 1 | 0 | 1 |
| Abhd1         | 3  | 1 | 1 | 0 |
| Fosl2         | 2  | 1 | 0 | 1 |
| Yes1          | 4  | 1 | 0 | 1 |
| Ppp2r2c       | 5  | 1 | 0 | 1 |
| Anapc4        | 4  | 1 | 0 | 1 |
| Slc34a2       | 2  | 1 | 0 | 1 |
| Wdr19         | 7  | 1 | 0 | 1 |
| Tmem33        | 6  | 1 | 1 | 0 |
| Srp72         | 2  | 1 | 1 | 0 |
| Areg          | 1  | 1 | 1 | 0 |
| Parm1         | 3  | 1 | 1 | 0 |
| Stbd1         | 3  | 1 | 0 | 1 |
| Shroom3       | 5  | 1 | 1 | 0 |
| Fras1         | 8  | 1 | 0 | 1 |
| Anxa3         | 5  | 1 | 1 | 0 |
| lbsp          | 3  | 1 | 1 | 0 |
| Btbd8         | 5  | 1 | 1 | 0 |
| Pde6b         | 4  | 1 | 1 | 0 |
| Galnt9        | 3  | 1 | 1 | 0 |
| Ddx51         | 2  | 1 | 1 | 0 |
| Chek2         | 8  | 1 | 1 | 0 |
| Crybb1        | 4  | 1 | 0 | 1 |
| Acacb         | 10 | 1 | 0 | 1 |
| Oasl1         | 3  | 1 | 1 | 0 |
| Sppl3         | 8  | 1 | 0 | 1 |
| Rab35         | 4  | 1 | 0 | 1 |
| Hrk           | 1  | 1 | 1 | 0 |
| Hip1r         | 4  | 1 | 0 | 1 |
| Gpr133        | 3  | 1 | 1 | 0 |
| Cct6a         | 9  | 1 | 0 | 1 |
| 2900083I11Rik | 8  | 1 | 0 | 1 |
| Hspb1         | 1  | 1 | 1 | 0 |
| Rasa4         | 6  | 1 | 1 | 0 |
| BC055004      | 5  | 1 | 1 | 0 |
| Fam20c        | 3  | 1 | 1 | 0 |
| Eif3b         | 4  | 1 | 1 | 0 |
| Amz1          | 7  | 1 | 1 | 0 |
| A330021E22Rik | 10 | 1 | 1 | 0 |
| Abcf2         | 4  | 1 | 1 | 0 |
| Xrcc2         | 3  | 1 | 1 | 0 |
| Ucn           | 2  | 1 | 1 | 0 |
| Spon2         | 2  | 1 | 0 | 1 |



|               |    |   |   |   |
|---------------|----|---|---|---|
| Fam53a        | 5  | 1 | 0 | 1 |
| Poln          | 8  | 1 | 0 | 1 |
| Htra3         | 5  | 1 | 1 | 0 |
| Zbtb49        | 4  | 1 | 0 | 1 |
| Bod1l         | 8  | 1 | 0 | 1 |
| Prom1         | 9  | 1 | 0 | 1 |
| Arap2         | 8  | 1 | 0 | 1 |
| Hpse          | 2  | 1 | 0 | 1 |
| Wdfy3         | 8  | 1 | 0 | 1 |
| Hfm1          | 16 | 1 | 0 | 1 |
| Fbrsl1        | 9  | 1 | 0 | 1 |
| Cryba4        | 4  | 1 | 0 | 1 |
| Selplg        | 2  | 1 | 1 | 0 |
| Alkbh2        | 6  | 1 | 0 | 1 |
| Trafd1        | 9  | 1 | 0 | 1 |
| Cux2          | 10 | 1 | 0 | 1 |
| Ift81         | 5  | 1 | 1 | 0 |
| Ncor2         | 17 | 1 | 0 | 1 |
| Limk1         | 5  | 1 | 0 | 1 |
| Serpine1      | 3  | 1 | 1 | 0 |
| Gpc2          | 7  | 1 | 1 | 0 |
| Micall2       | 3  | 1 | 1 | 0 |
| Mmd2          | 5  | 1 | 1 | 0 |
| Zfp316        | 4  | 1 | 0 | 1 |
| Ccz1          | 2  | 1 | 1 | 0 |
| Gm15411       | 4  | 1 | 0 | 1 |
| Il6           | 3  | 1 | 1 | 0 |
| Gm15800       | 4  | 1 | 0 | 1 |
| XLOC_025899   | 2  | 1 | 1 | 0 |
| Tmem119       | 2  | 1 | 1 | 0 |
| Ppbp          | 1  | 1 | 1 | 0 |
| XLOC_025402   | 4  | 1 | 0 | 1 |
| Gm13826       | 2  | 1 | 1 | 0 |
| XLOC_026130   | 3  | 1 | 0 | 1 |
| Trim54        | 1  | 1 | 1 | 0 |
| AK080411      | 1  | 1 | 1 | 0 |
| XLOC_025519   | 2  | 1 | 1 | 0 |
| XLOC_025579   | 1  | 1 | 1 | 0 |
| Gm17019       | 3  | 1 | 1 | 0 |
| Gm16001       | 2  | 1 | 1 | 0 |
| Peg10         | 3  | 1 | 0 | 1 |
| Glcci1        | 11 | 1 | 1 | 0 |
| Nxph1         | 6  | 1 | 0 | 1 |
| A430107O13Rik | 6  | 1 | 1 | 0 |
| Lrguk         | 7  | 1 | 0 | 1 |
| Akr1b8        | 2  | 1 | 1 | 0 |
| Agbl3         | 6  | 1 | 0 | 1 |

|                |    |   |   |   |
|----------------|----|---|---|---|
| Ttc26          | 3  | 1 | 1 | 0 |
| Clec2l         | 3  | 1 | 0 | 1 |
| TCR-beta chain | 4  | 1 | 1 | 0 |
| Cul1           | 5  | 1 | 0 | 1 |
| Krba1          | 9  | 1 | 1 | 0 |
| Gimap1         | 4  | 1 | 0 | 1 |
| AK043004       | 9  | 1 | 0 | 1 |
| Prr15          | 2  | 1 | 1 | 0 |
| Prdm5          | 11 | 1 | 0 | 1 |
| Pcgf1          | 2  | 1 | 1 | 0 |
| Alms1          | 15 | 1 | 0 | 1 |
| Fgd5           | 6  | 1 | 1 | 0 |
| Fam19a1        | 5  | 1 | 0 | 1 |
| Arl6ip5        | 5  | 1 | 1 | 0 |
| Ppp4r2         | 5  | 1 | 1 | 0 |
| Slc6a11        | 2  | 1 | 0 | 1 |
| Slc6a1         | 4  | 1 | 1 | 0 |
| Syn2           | 4  | 1 | 0 | 1 |
| Rad52          | 10 | 1 | 1 | 0 |
| Mfap5          | 2  | 1 | 0 | 1 |
| Clec4a1        | 2  | 1 | 1 | 0 |
| Clec4a2        | 2  | 1 | 1 | 0 |
| Clec4n         | 3  | 1 | 1 | 0 |
| Phb2           | 2  | 1 | 1 | 0 |
| Tspan11        | 5  | 1 | 0 | 1 |
| Plekha5        | 11 | 1 | 0 | 1 |
| Slco1c1        | 4  | 1 | 1 | 0 |
| AK087382       | 1  | 1 | 1 | 0 |
| Samd9l         | 2  | 1 | 1 | 0 |
| Zfp800         | 9  | 1 | 1 | 0 |
| Rbm28          | 3  | 1 | 1 | 0 |
| Gm2058         | 4  | 1 | 1 | 0 |
| Dgki           | 7  | 1 | 1 | 0 |
| Tpk1           | 9  | 1 | 1 | 0 |
| Ezh2           | 10 | 1 | 1 | 0 |
| Gimap3         | 4  | 1 | 0 | 1 |
| Nod1           | 5  | 1 | 0 | 1 |
| Ppm1k          | 4  | 1 | 0 | 1 |
| Vamp8          | 3  | 1 | 1 | 0 |
| Dok1           | 5  | 1 | 1 | 0 |
| Cd207          | 2  | 1 | 1 | 0 |
| Arhgap25       | 6  | 1 | 1 | 0 |
| Aplf           | 4  | 1 | 1 | 0 |
| Wnt7a          | 3  | 1 | 0 | 1 |
| Cntn3          | 6  | 1 | 0 | 1 |
| XLOC_028313    | 3  | 1 | 1 | 0 |
| Prrt3          | 4  | 1 | 0 | 1 |

|               |    |   |   |   |
|---------------|----|---|---|---|
| Tmem40        | 6  | 1 | 0 | 1 |
| BC060267      | 8  | 1 | 1 | 0 |
| Mbd4          | 7  | 1 | 0 | 1 |
| Zfp422        | 3  | 1 | 0 | 1 |
| Zfp9          | 2  | 1 | 1 | 0 |
| Apobec1       | 6  | 1 | 0 | 1 |
| C3ar1         | 1  | 1 | 1 | 0 |
| Ptpn6         | 4  | 1 | 1 | 0 |
| Clec1a        | 3  | 1 | 0 | 1 |
| Art4          | 3  | 1 | 1 | 0 |
| Slc15a5       | 5  | 1 | 0 | 1 |
| Slco1a4       | 10 | 1 | 1 | 0 |
| Kcnj8         | 5  | 1 | 1 | 0 |
| Loxl3         | 3  | 1 | 1 | 0 |
| Gm5577        | 3  | 1 | 0 | 1 |
| Mitf          | 6  | 1 | 0 | 1 |
| Gcc1          | 2  | 1 | 0 | 1 |
| Hpgds         | 2  | 1 | 1 | 0 |
| AK161590      | 4  | 1 | 1 | 0 |
| Ccdc37        | 6  | 1 | 0 | 1 |
| Ccdc48        | 6  | 1 | 1 | 0 |
| Cecr2         | 3  | 1 | 0 | 1 |
| Slc25a18      | 2  | 1 | 0 | 1 |
| Dera          | 1  | 1 | 0 | 1 |
| Nup210        | 4  | 1 | 1 | 0 |
| Reg3b         | 2  | 1 | 1 | 0 |
| Reg1          | 2  | 1 | 1 | 0 |
| XLOC_027806   | 1  | 1 | 1 | 0 |
| Prp2          | 1  | 1 | 1 | 0 |
| A430110N23Rik | 7  | 1 | 1 | 0 |
| Eml2          | 9  | 1 | 0 | 1 |
| Ercc2         | 4  | 1 | 0 | 1 |
| Plaur         | 4  | 1 | 1 | 0 |
| Zfp574        | 6  | 1 | 1 | 0 |
| Megf8         | 9  | 1 | 0 | 1 |
| Tgfb1         | 3  | 1 | 1 | 0 |
| Zfp30         | 7  | 1 | 0 | 1 |
| AI428936      | 8  | 1 | 0 | 1 |
| Tyrobp        | 1  | 1 | 1 | 0 |
| Ankrd27       | 4  | 1 | 1 | 0 |
| Etfb          | 4  | 1 | 0 | 1 |
| Hsd17b14      | 10 | 1 | 0 | 1 |
| Tmem86a       | 4  | 1 | 1 | 0 |
| Atp10a        | 4  | 1 | 1 | 0 |
| Ube3a         | 7  | 1 | 0 | 1 |
| Adamts17      | 5  | 1 | 0 | 1 |
| Lysmd4        | 4  | 1 | 0 | 1 |

|               |    |   |   |   |
|---------------|----|---|---|---|
| Fam169b       | 6  | 1 | 1 | 0 |
| Pde8a         | 3  | 1 | 0 | 1 |
| Sh3gl3        | 5  | 1 | 1 | 0 |
| Mex3b         | 3  | 1 | 0 | 1 |
| Ctsc          | 3  | 1 | 1 | 0 |
| Me3           | 5  | 1 | 0 | 1 |
| Rab30         | 3  | 1 | 0 | 1 |
| Alg8          | 5  | 1 | 1 | 0 |
| Pak1          | 4  | 1 | 0 | 1 |
| Cckbr         | 1  | 1 | 1 | 0 |
| Dnhd1         | 11 | 1 | 0 | 1 |
| Mical2        | 6  | 1 | 0 | 1 |
| Arntl         | 7  | 1 | 0 | 1 |
| 1110004F10Rik | 4  | 1 | 0 | 1 |
| Nucb2         | 3  | 1 | 1 | 0 |
| Tmc5          | 7  | 1 | 1 | 0 |
| Acsm3         | 1  | 1 | 1 | 0 |
| Prkcb         | 3  | 1 | 0 | 1 |
| Srcap         | 4  | 1 | 0 | 1 |
| Plekha1       | 5  | 1 | 0 | 1 |
| Lhpp          | 7  | 1 | 1 | 0 |
| Inpp5a        | 2  | 1 | 0 | 1 |
| Paox          | 7  | 1 | 1 | 0 |
| Eps8l2        | 4  | 1 | 1 | 0 |
| Pnpla2        | 3  | 1 | 1 | 0 |
| Dhcr7         | 7  | 1 | 0 | 1 |
| Mrgprf        | 2  | 1 | 1 | 0 |
| Zfp787        | 5  | 1 | 1 | 0 |
| Zfp329        | 4  | 1 | 0 | 1 |
| Sepw1         | 6  | 1 | 1 | 0 |
| Ehd2          | 5  | 1 | 1 | 0 |
| C5ar1         | 1  | 1 | 1 | 0 |
| Clasrp        | 11 | 1 | 0 | 1 |
| Zfp109        | 4  | 1 | 0 | 1 |
| Zfp94         | 10 | 1 | 1 | 0 |
| Erf           | 3  | 1 | 1 | 0 |
| Cyp2s1        | 3  | 1 | 0 | 1 |
| Itpkc         | 2  | 1 | 1 | 0 |
| Actn4         | 4  | 1 | 0 | 1 |
| Sipa1l3       | 3  | 1 | 0 | 1 |
| XLOC_030290   | 5  | 1 | 1 | 0 |
| Wdr62         | 13 | 1 | 1 | 0 |
| Rbm42         | 11 | 1 | 1 | 0 |
| Scn1b         | 7  | 1 | 0 | 1 |
| Rpl13a        | 7  | 1 | 1 | 0 |
| Flt3l         | 13 | 1 | 1 | 0 |
| Sult2b1       | 5  | 1 | 1 | 0 |

|               |    |   |   |   |
|---------------|----|---|---|---|
| Abcc8         | 3  | 1 | 0 | 1 |
| Tsg101        | 5  | 1 | 1 | 0 |
| Klf13         | 3  | 1 | 0 | 1 |
| Lrrk1         | 4  | 1 | 0 | 1 |
| Aldh1a3       | 3  | 1 | 0 | 1 |
| Hapln3        | 4  | 1 | 0 | 1 |
| Blm           | 6  | 1 | 0 | 1 |
| Slco2b1       | 6  | 1 | 1 | 0 |
| P2ry6         | 2  | 1 | 1 | 0 |
| Trim68        | 8  | 1 | 1 | 0 |
| Olfr78        | 3  | 1 | 1 | 0 |
| Tpp1          | 2  | 1 | 1 | 0 |
| Tmem41b       | 5  | 1 | 0 | 1 |
| Rras2         | 2  | 1 | 1 | 0 |
| Syt17         | 4  | 1 | 1 | 0 |
| Tbc1d10b      | 4  | 1 | 1 | 0 |
| Prss53        | 5  | 1 | 1 | 0 |
| Fgfr2         | 7  | 1 | 0 | 1 |
| Tcerg1l       | 4  | 1 | 1 | 0 |
| Tubgcp2       | 4  | 1 | 0 | 1 |
| Rnh1          | 3  | 1 | 1 | 0 |
| Hras1         | 7  | 1 | 1 | 0 |
| Igf2          | 2  | 1 | 1 | 0 |
| Ccnd1         | 2  | 1 | 1 | 0 |
| Olfr1344      | 3  | 1 | 1 | 0 |
| Shank1        | 8  | 1 | 0 | 1 |
| Hs3st4        | 2  | 1 | 0 | 1 |
| XLOC_030069   | 4  | 1 | 0 | 1 |
| Kcnq1         | 9  | 1 | 1 | 0 |
| Atg16l2       | 12 | 1 | 0 | 1 |
| Zfp668        | 4  | 1 | 1 | 0 |
| 1810014F10Rik | 3  | 1 | 0 | 1 |
| B230206H07Rik | 7  | 1 | 1 | 0 |
| Ppp1r13l      | 4  | 1 | 0 | 1 |
| XLOC_029660   | 1  | 1 | 0 | 1 |
| Akt1s1        | 2  | 1 | 0 | 1 |
| C330019L16Rik | 1  | 1 | 0 | 1 |
| 4931406B18Rik | 2  | 1 | 1 | 0 |
| XLOC_030435   | 2  | 1 | 0 | 1 |
| XLOC_030012   | 2  | 1 | 1 | 0 |
| AW146154      | 5  | 1 | 1 | 0 |
| Igsf6         | 2  | 1 | 1 | 0 |
| Mcph1         | 4  | 1 | 0 | 1 |
| Rnf170        | 10 | 1 | 1 | 0 |
| Thap1         | 5  | 1 | 0 | 1 |
| Fut10         | 5  | 1 | 0 | 1 |
| Gsr           | 3  | 1 | 1 | 0 |

|               |    |   |   |   |
|---------------|----|---|---|---|
| Ufsp2         | 5  | 1 | 0 | 1 |
| Dctd          | 4  | 1 | 1 | 0 |
| Aga           | 2  | 1 | 0 | 1 |
| Sh3rf1        | 3  | 1 | 0 | 1 |
| Lrrc25        | 2  | 1 | 1 | 0 |
| Mtap1s        | 5  | 1 | 0 | 1 |
| Jak3          | 7  | 1 | 1 | 0 |
| Zfp961        | 3  | 1 | 0 | 1 |
| Ap1m1         | 3  | 1 | 1 | 0 |
| Hmox1         | 2  | 1 | 1 | 0 |
| Inpp4b        | 6  | 1 | 0 | 1 |
| Lyl1          | 6  | 1 | 1 | 0 |
| Tnpo2         | 8  | 1 | 1 | 0 |
| Lonp2         | 4  | 1 | 1 | 0 |
| Mmp2          | 2  | 1 | 1 | 0 |
| XLOC_032505   | 10 | 1 | 0 | 1 |
| CKLF6         | 5  | 1 | 0 | 1 |
| Pdp2          | 3  | 1 | 1 | 0 |
| Ces2g         | 3  | 1 | 0 | 1 |
| Prmt7         | 2  | 1 | 1 | 0 |
| Cdh3          | 3  | 1 | 0 | 1 |
| AK015813      | 6  | 1 | 1 | 0 |
| Wwp2          | 4  | 1 | 1 | 0 |
| Pmfbp1        | 10 | 1 | 0 | 1 |
| Plcg2         | 6  | 1 | 1 | 0 |
| Cdh13         | 2  | 1 | 1 | 0 |
| Gse1          | 9  | 1 | 1 | 0 |
| Irf8          | 4  | 1 | 0 | 1 |
| Cdt1          | 5  | 1 | 0 | 1 |
| Dpep1         | 2  | 1 | 0 | 1 |
| Gm505         | 4  | 1 | 1 | 0 |
| Itgb1         | 6  | 1 | 1 | 0 |
| Pex11c        | 3  | 1 | 1 | 0 |
| Brf2          | 2  | 1 | 0 | 1 |
| Sgcz          | 2  | 1 | 0 | 1 |
| Msr1          | 1  | 1 | 1 | 0 |
| Ccdc111       | 5  | 1 | 1 | 0 |
| Wdr17         | 8  | 1 | 0 | 1 |
| Tll1          | 3  | 1 | 0 | 1 |
| Upf1          | 4  | 1 | 1 | 0 |
| Mast3         | 6  | 1 | 0 | 1 |
| 9130011J15Rik | 5  | 1 | 0 | 1 |
| 1700011L22Rik | 4  | 1 | 0 | 1 |
| Zfp330        | 8  | 1 | 0 | 1 |
| Cd97          | 6  | 1 | 1 | 0 |
| Ccdc130       | 3  | 1 | 1 | 0 |
| Vps35         | 3  | 1 | 0 | 1 |

|               |    |   |   |   |
|---------------|----|---|---|---|
| XLOC_032981   | 1  | 1 | 0 | 1 |
| Gm5913        | 1  | 1 | 0 | 1 |
| Gfod2         | 4  | 1 | 1 | 0 |
| Slc12a4       | 5  | 1 | 1 | 0 |
| Smpd3         | 2  | 1 | 1 | 0 |
| Marveld3      | 3  | 1 | 0 | 1 |
| Calb2         | 1  | 1 | 0 | 1 |
| Fuk           | 2  | 1 | 1 | 0 |
| Pkd1l2        | 16 | 1 | 0 | 1 |
| Kcng4         | 5  | 1 | 0 | 1 |
| Fam92b        | 1  | 1 | 0 | 1 |
| 1190005I06Rik | 2  | 1 | 0 | 1 |
| Klhdc4        | 6  | 1 | 1 | 0 |
| AK032654      | 5  | 1 | 1 | 0 |
| 1300018I17Rik | 4  | 1 | 0 | 1 |
| Sipa1l2       | 5  | 1 | 1 | 0 |
| XLOC_032144   | 1  | 1 | 1 | 0 |
| XLOC_032260   | 2  | 1 | 1 | 0 |
| Trmt1         | 3  | 1 | 0 | 1 |
| Lpla2         | 1  | 1 | 1 | 0 |
| Cenpt         | 3  | 1 | 1 | 0 |
| Podnl1        | 6  | 1 | 1 | 0 |
| Star          | 1  | 1 | 1 | 0 |
| Zfp964        | 1  | 1 | 0 | 1 |
| XLOC_032830   | 4  | 1 | 1 | 0 |
| Gpr83         | 4  | 1 | 1 | 0 |
| BC017612      | 5  | 1 | 1 | 0 |
| Icam5         | 2  | 1 | 0 | 1 |
| Pde4a         | 5  | 1 | 1 | 0 |
| Slc44a2       | 4  | 1 | 1 | 0 |
| Prkcsh        | 5  | 1 | 1 | 0 |
| B3gat1        | 3  | 1 | 0 | 1 |
| Opcml         | 8  | 1 | 0 | 1 |
| Cdon          | 2  | 1 | 1 | 0 |
| Drd2          | 7  | 1 | 1 | 0 |
| Cryab         | 4  | 1 | 1 | 0 |
| Gldn          | 2  | 1 | 0 | 1 |
| AI118078      | 5  | 1 | 0 | 1 |
| Rcn2          | 2  | 1 | 1 | 0 |
| Cspg4         | 2  | 1 | 0 | 1 |
| Stoml1        | 4  | 1 | 1 | 0 |
| Adpgk         | 3  | 1 | 0 | 1 |
| Igdcc3        | 7  | 1 | 0 | 1 |
| Parp16        | 4  | 1 | 1 | 0 |
| Rora          | 2  | 1 | 1 | 0 |
| Narg2         | 8  | 1 | 1 | 0 |
| Onecut1       | 3  | 1 | 0 | 1 |

|               |    |   |   |   |
|---------------|----|---|---|---|
| Gnb5          | 4  | 1 | 0 | 1 |
| XLOC_034422   | 4  | 1 | 1 | 0 |
| Irak1bp1      | 3  | 1 | 0 | 1 |
| Rwdd2a        | 3  | 1 | 1 | 0 |
| Mrap2         | 8  | 1 | 0 | 1 |
| Bcl2a1b       | 2  | 1 | 1 | 0 |
| Ctsh          | 3  | 1 | 1 | 0 |
| Adamts7       | 10 | 1 | 1 | 0 |
| Cep70         | 7  | 1 | 0 | 1 |
| Topbp1        | 3  | 1 | 0 | 1 |
| Cish          | 2  | 1 | 1 | 0 |
| Rassf1        | 3  | 1 | 1 | 0 |
| Mst1r         | 8  | 1 | 1 | 0 |
| Pfkfb4        | 3  | 1 | 1 | 0 |
| Nme6          | 9  | 1 | 1 | 0 |
| Ngp           | 1  | 1 | 0 | 1 |
| Dclk3         | 3  | 1 | 1 | 0 |
| Golga4        | 8  | 1 | 0 | 1 |
| Nktr          | 9  | 1 | 0 | 1 |
| Limd1         | 3  | 1 | 1 | 0 |
| Birc2         | 5  | 1 | 0 | 1 |
| Elavl3        | 4  | 1 | 1 | 0 |
| Zfp653        | 7  | 1 | 1 | 0 |
| Ntm           | 6  | 1 | 0 | 1 |
| Tecta         | 5  | 1 | 1 | 0 |
| C2cd2l        | 3  | 1 | 0 | 1 |
| Cep164        | 10 | 1 | 0 | 1 |
| Htr3b         | 5  | 1 | 0 | 1 |
| Gm684         | 2  | 1 | 0 | 1 |
| Gapdh         | 3  | 1 | 1 | 0 |
| Cul5          | 4  | 1 | 0 | 1 |
| Rab39         | 4  | 1 | 0 | 1 |
| Islr          | 3  | 1 | 1 | 0 |
| Smad3         | 3  | 1 | 1 | 0 |
| Rab11a        | 7  | 1 | 0 | 1 |
| Tex9          | 3  | 1 | 1 | 0 |
| Fbxo9         | 9  | 1 | 0 | 1 |
| Lca5          | 8  | 1 | 0 | 1 |
| Me1           | 6  | 1 | 0 | 1 |
| 4922501C03Rik | 7  | 1 | 0 | 1 |
| Chst2         | 1  | 1 | 1 | 0 |
| Armc8         | 5  | 1 | 0 | 1 |
| Glyctk        | 7  | 1 | 0 | 1 |
| Ppm1m         | 6  | 1 | 1 | 0 |
| Mlh1          | 5  | 1 | 1 | 0 |
| Arpp21        | 7  | 1 | 0 | 1 |
| Stt3b         | 3  | 1 | 1 | 0 |



|             |       |    |   |   |   |
|-------------|-------|----|---|---|---|
| Cx3cr1      |       | 1  | 1 | 1 | 0 |
| AK089135    |       | 2  | 1 | 0 | 1 |
| XLOC_035131 |       | 5  | 1 | 1 | 0 |
| Fyco1       |       | 6  | 1 | 1 | 0 |
| Ccr1        |       | 1  | 1 | 1 | 0 |
| Icam1       |       | 3  | 1 | 1 | 0 |
| Prdm10      |       | 8  | 1 | 1 | 0 |
| Zfp167      |       | 6  | 1 | 1 | 0 |
| Mpi         |       | 2  | 1 | 1 | 0 |
| Zwilch      |       | 3  | 1 | 0 | 1 |
| Megf11      |       | 5  | 1 | 0 | 1 |
| XLOC_034646 |       | 5  | 1 | 1 | 0 |
| Esyt3       |       | 5  | 1 | 0 | 1 |
| Lrrc2       |       | 2  | 1 | 1 | 0 |
| Ccr5        |       | 1  | 1 | 1 | 0 |
| Chrna5      |       | 1  | 1 | 1 | 0 |
| Aqp9        |       | 1  | 1 | 1 | 0 |
| Gpkow       |       | 5  | 1 | 0 | 1 |
| Tspan7      |       | 5  | 1 | 1 | 0 |
| Kdm6a       |       | 8  | 1 | 1 | 0 |
| Ube2a       |       | 2  | 1 | 1 | 0 |
| Bcor1       |       | 6  | 1 | 1 | 0 |
| Hprt        |       | 3  | 1 | 0 | 1 |
| Aff2        |       | 4  | 1 | 0 | 1 |
| Hmgb3       |       | 4  | 1 | 1 | 0 |
| Xlr4e-ps    |       | 4  | 1 | 0 | 1 |
| Klhl15      |       | 6  | 1 | 0 | 1 |
| Apoo        |       | 4  | 1 | 0 | 1 |
| Gm14827     |       | 7  | 1 | 0 | 1 |
| Uprt        |       | 3  | 1 | 0 | 1 |
| Pcdh11x     |       | 4  | 1 | 0 | 1 |
| Gprasp1     |       | 6  | 1 | 0 | 1 |
| Prps1       |       | 3  | 1 | 0 | 1 |
| Pir         |       | 4  | 1 | 1 | 0 |
| Ccdc22      |       | 6  | 1 | 1 | 0 |
| Med14       |       | 4  | 1 | 0 | 1 |
| Efhc2       |       | 6  | 1 | 0 | 1 |
|             | 41888 | 10 | 1 | 1 | 0 |
| Atp11c      |       | 10 | 1 | 1 | 0 |
| Pdzd4       |       | 7  | 1 | 0 | 1 |
| Naa10       |       | 6  | 1 | 1 | 0 |
| Rps6ka6     |       | 5  | 1 | 0 | 1 |
| Tceal6      |       | 3  | 1 | 0 | 1 |
| Gpr173      |       | 6  | 1 | 0 | 1 |
| Car5b       |       | 3  | 1 | 1 | 0 |
| AK013876    |       | 3  | 1 | 0 | 1 |
| Plp2        |       | 5  | 1 | 0 | 1 |

|               |    |   |   |   |
|---------------|----|---|---|---|
| Arhgap4       | 5  | 1 | 1 | 0 |
| Renbp         | 4  | 1 | 1 | 0 |
| Dcx           | 1  | 1 | 1 | 0 |
| XLOC_036520   | 1  | 1 | 0 | 1 |
| Gm1992        | 1  | 0 | 0 | 0 |
| XLOC_000002   | 1  | 0 | 0 | 0 |
| Atp6v1h       | 7  | 0 | 0 | 0 |
| Oprk1         | 1  | 0 | 0 | 0 |
| Rb1cc1        | 4  | 0 | 0 | 0 |
| Pcmt1d1       | 6  | 0 | 0 | 0 |
| Rrs1          | 1  | 0 | 0 | 0 |
| Adhfe1        | 1  | 0 | 0 | 0 |
| Sgk3          | 6  | 0 | 0 | 0 |
| 6030422M02Rik | 5  | 0 | 0 | 0 |
| Prex2         | 6  | 0 | 0 | 0 |
| XLOC_000017   | 3  | 0 | 0 | 0 |
| Sulf1         | 6  | 0 | 0 | 0 |
| Kcnb2         | 4  | 0 | 0 | 0 |
| Terf1         | 3  | 0 | 0 | 0 |
| Rdh10         | 1  | 0 | 0 | 0 |
| Tmem70        | 2  | 0 | 0 | 0 |
| Ly96          | 4  | 0 | 0 | 0 |
| XLOC_000028   | 1  | 0 | 0 | 0 |
| Gdap1         | 2  | 0 | 0 | 0 |
| Crispld1      | 4  | 0 | 0 | 0 |
| Paqr8         | 2  | 0 | 0 | 0 |
| Efhc1         | 2  | 0 | 0 | 0 |
| XLOC_000032   | 1  | 0 | 0 | 0 |
| Tmem14a       | 4  | 0 | 0 | 0 |
| Lmbrd1        | 3  | 0 | 0 | 0 |
| Gm9884        | 2  | 0 | 0 | 0 |
| AK188812      | 2  | 0 | 0 | 0 |
| Khdrbs2       | 4  | 0 | 0 | 0 |
| XLOC_000042   | 4  | 0 | 0 | 0 |
| Rab23         | 7  | 0 | 0 | 0 |
| Dst           | 16 | 0 | 0 | 0 |
| Imp4          | 3  | 0 | 0 | 0 |
| Fam123c       | 3  | 0 | 0 | 0 |
| mKIAA1112     | 4  | 0 | 0 | 0 |
| Hs6st1        | 4  | 0 | 0 | 0 |
| Arid5a        | 4  | 0 | 0 | 0 |
| Cnm4          | 4  | 0 | 0 | 0 |
| Cnm3          | 2  | 0 | 0 | 0 |
| Cox5b         | 5  | 0 | 0 | 0 |
| Vwa3b         | 2  | 0 | 0 | 0 |
| 4921511C04Rik | 3  | 0 | 0 | 0 |
| Inpp4a        | 4  | 0 | 0 | 0 |

|               |    |   |   |   |
|---------------|----|---|---|---|
| Unc50         | 2  | 0 | 0 | 0 |
| Lipt1         | 1  | 0 | 0 | 0 |
| Mrpl30        | 4  | 0 | 0 | 0 |
| XLOC_000063   | 2  | 0 | 0 | 0 |
| Eif5b         | 2  | 0 | 0 | 0 |
| Nms           | 2  | 0 | 0 | 0 |
| Pdcl3         | 2  | 0 | 0 | 0 |
| Npas2         | 5  | 0 | 0 | 0 |
| D1Bwg0212e    | 1  | 0 | 0 | 0 |
| Il1r2         | 2  | 0 | 0 | 0 |
| Il1r1         | 6  | 0 | 0 | 0 |
| Slc9a2        | 3  | 0 | 0 | 0 |
| Mrps9         | 1  | 0 | 0 | 0 |
| Gpr45         | 2  | 0 | 0 | 0 |
| A1597479      | 2  | 0 | 0 | 0 |
| 1500015O10Rik | 1  | 0 | 0 | 0 |
| Tpp2          | 5  | 0 | 0 | 0 |
| Ercc5         | 5  | 0 | 0 | 0 |
| Gulp1         | 3  | 0 | 0 | 0 |
| Col3a1        | 3  | 0 | 0 | 0 |
| Wdr75         | 3  | 0 | 0 | 0 |
| Dnahc7b       | 4  | 0 | 0 | 0 |
| XLOC_000092   | 1  | 0 | 0 | 0 |
| Tmeff2        | 10 | 0 | 0 | 0 |
| Stat1         | 10 | 0 | 0 | 0 |
| XLOC_000099   | 2  | 0 | 0 | 0 |
| Hibch         | 2  | 0 | 0 | 0 |
| Mstn          | 2  | 0 | 0 | 0 |
| Ormdl1        | 1  | 0 | 0 | 0 |
| Osgepl1       | 2  | 0 | 0 | 0 |
| Coq10b        | 2  | 0 | 0 | 0 |
| Hspe1         | 3  | 0 | 0 | 0 |
| Gm8292        | 1  | 0 | 0 | 0 |
| Plcl1         | 3  | 0 | 0 | 0 |
| XLOC_000111   | 1  | 0 | 0 | 0 |
| 1700066M21Rik | 4  | 0 | 0 | 0 |
| Spats2l       | 9  | 0 | 0 | 0 |
| Sgol2         | 3  | 0 | 0 | 0 |
| Aox4          | 1  | 0 | 0 | 0 |
| Bzw1          | 4  | 0 | 0 | 0 |
| Nif3l1        | 4  | 0 | 0 | 0 |
| AK053027      | 3  | 0 | 0 | 0 |
| Ndufb3        | 2  | 0 | 0 | 0 |
| Casp8         | 3  | 0 | 0 | 0 |
| Stradb        | 2  | 0 | 0 | 0 |
| PAPK-A        | 1  | 0 | 0 | 0 |
| Cdk15         | 9  | 0 | 0 | 0 |

|             |    |   |   |   |
|-------------|----|---|---|---|
| Nop58       | 1  | 0 | 0 | 0 |
| Bmpr2       | 2  | 0 | 0 | 0 |
| Fam117b     | 4  | 0 | 0 | 0 |
| Carf        | 5  | 0 | 0 | 0 |
| Cyp20a1     | 5  | 0 | 0 | 0 |
| Abi2        | 7  | 0 | 0 | 0 |
| Pard3b      | 2  | 0 | 0 | 0 |
| Nrp2        | 5  | 0 | 0 | 0 |
| Eef1b2      | 6  | 0 | 0 | 0 |
| Adam23      | 3  | 0 | 0 | 0 |
| Fastkd2     | 2  | 0 | 0 | 0 |
| Creb1       | 6  | 0 | 0 | 0 |
| Pikfyve     | 10 | 0 | 0 | 0 |
| Pth2r       | 2  | 0 | 0 | 0 |
| Unc80       | 7  | 0 | 0 | 0 |
| Rpe         | 2  | 0 | 0 | 0 |
| Atic        | 3  | 0 | 0 | 0 |
| AK044410    | 2  | 0 | 0 | 0 |
| Tmem169     | 3  | 0 | 0 | 0 |
| Xrcc5       | 6  | 0 | 0 | 0 |
| Arpc2       | 3  | 0 | 0 | 0 |
| Gm216       | 5  | 0 | 0 | 0 |
| Ctdsp1      | 2  | 0 | 0 | 0 |
| Rqcd1       | 3  | 0 | 0 | 0 |
| Plcd4       | 4  | 0 | 0 | 0 |
| Stk36       | 8  | 0 | 0 | 0 |
| Tll4        | 4  | 0 | 0 | 0 |
| Cyp27a1     | 5  | 0 | 0 | 0 |
| Wnt6        | 2  | 0 | 0 | 0 |
| Fam134a     | 3  | 0 | 0 | 0 |
| Zfand2b     | 3  | 0 | 0 | 0 |
| Dnajb2      | 5  | 0 | 0 | 0 |
| Des         | 2  | 0 | 0 | 0 |
| Gmppa       | 5  | 0 | 0 | 0 |
| Stk11ip     | 5  | 0 | 0 | 0 |
| Slc4a3      | 13 | 0 | 0 | 0 |
| XLOC_000190 | 1  | 0 | 0 | 0 |
| Mogat1      | 3  | 0 | 0 | 0 |
| Acsl3       | 3  | 0 | 0 | 0 |
| Kcne4       | 2  | 0 | 0 | 0 |
| Col4a3      | 1  | 0 | 0 | 0 |
| Mff         | 5  | 0 | 0 | 0 |
| Agfg1       | 9  | 0 | 0 | 0 |
| Gm6374      | 1  | 0 | 0 | 0 |
| BC100303    | 2  | 0 | 0 | 0 |
| Cab39       | 4  | 0 | 0 | 0 |
| Itm2c       | 1  | 0 | 0 | 0 |

|               |       |   |   |   |
|---------------|-------|---|---|---|
| 4933407L21Rik | 1     | 0 | 0 | 0 |
| 2810459M11Rik | 1     | 0 | 0 | 0 |
| Psmc1         | 6     | 0 | 0 | 0 |
| Armc9         | 7     | 0 | 0 | 0 |
| XLOC_000215   | 1     | 0 | 0 | 0 |
| Cops7b        | 4     | 0 | 0 | 0 |
| Dis3l2        | 5     | 0 | 0 | 0 |
| Neu2          | 1     | 0 | 0 | 0 |
| Atg16l1       | 3     | 0 | 0 | 0 |
| Dgkd          | 2     | 0 | 0 | 0 |
| Ugt1a6a       | 3     | 0 | 0 | 0 |
| Trpm8         | 5     | 0 | 0 | 0 |
| Sh3bp4        | 5     | 0 | 0 | 0 |
| Agap1         | 8     | 0 | 0 | 0 |
| Cxcr7         | 1     | 0 | 0 | 0 |
| Cops8         | 1     | 0 | 0 | 0 |
| Lrrfip1       | 5     | 0 | 0 | 0 |
| Ramp1         | 1     | 0 | 0 | 0 |
| Ube2f         | 5     | 0 | 0 | 0 |
| Scly          | 2     | 0 | 0 | 0 |
| Traf3ip1      | 3     | 0 | 0 | 0 |
| mKIAA1146     | 1     | 0 | 0 | 0 |
| Asb1          | 2     | 0 | 0 | 0 |
| Gpc1          | 4     | 0 | 0 | 0 |
| Dusp28        | 1     | 0 | 0 | 0 |
| Rnpepl1       | 7     | 0 | 0 | 0 |
| Capn10        | 4     | 0 | 0 | 0 |
| Gpr35         | 7     | 0 | 0 | 0 |
| Ppp1r7        | 4     | 0 | 0 | 0 |
|               | 41884 | 1 | 0 | 0 |
| Farp2         | 1     | 0 | 0 | 0 |
| Bok           | 1     | 0 | 0 | 0 |
| Atg4b         | 4     | 0 | 0 | 0 |
| Ing5          | 3     | 0 | 0 | 0 |
| D2hgdh        | 9     | 0 | 0 | 0 |
| Fam174a       | 1     | 0 | 0 | 0 |
| Gm3555        | 1     | 0 | 0 | 0 |
| Cntnap5b      | 3     | 0 | 0 | 0 |
| Cdh20         | 3     | 0 | 0 | 0 |
| 2310035C23Rik | 6     | 0 | 0 | 0 |
| Tnfrsf11a     | 4     | 0 | 0 | 0 |
| XLOC_000275   | 1     | 0 | 0 | 0 |
| Phlpp1        | 2     | 0 | 0 | 0 |
| Serpinb8      | 1     | 0 | 0 | 0 |
| Mki67ip       | 1     | 0 | 0 | 0 |
| Clasp1        | 4     | 0 | 0 | 0 |
| Ccdc93        | 4     | 0 | 0 | 0 |

|               |   |   |   |   |
|---------------|---|---|---|---|
| XLOC_000292   | 1 | 0 | 0 | 0 |
| Slc35f5       | 4 | 0 | 0 | 0 |
| Gpr39         | 2 | 0 | 0 | 0 |
| Mgat5         | 3 | 0 | 0 | 0 |
| XLOC_000298   | 1 | 0 | 0 | 0 |
| Ccnt2         | 4 | 0 | 0 | 0 |
| Rab3gap1      | 2 | 0 | 0 | 0 |
| Rpl28-ps1     | 1 | 0 | 0 | 0 |
| R3hdm1        | 5 | 0 | 0 | 0 |
| Ubxn4         | 4 | 0 | 0 | 0 |
| Yod1          | 1 | 0 | 0 | 0 |
| 5430435G22Rik | 4 | 0 | 0 | 0 |
| Pm20d1        | 1 | 0 | 0 | 0 |
| Slc41a1       | 3 | 0 | 0 | 0 |
| Rab711        | 1 | 0 | 0 | 0 |
| Nucks1        | 2 | 0 | 0 | 0 |
| Slc45a3       | 2 | 0 | 0 | 0 |
| Elk4          | 2 | 0 | 0 | 0 |
| Klhdc8a       | 3 | 0 | 0 | 0 |
| Nuak2         | 2 | 0 | 0 | 0 |
| Dstyk         | 3 | 0 | 0 | 0 |
| Rbbp5         | 6 | 0 | 0 | 0 |
| XLOC_000325   | 1 | 0 | 0 | 0 |
| Lrrn2         | 3 | 0 | 0 | 0 |
| XLOC_000326   | 1 | 0 | 0 | 0 |
| Pik3c2b       | 4 | 0 | 0 | 0 |
| XLOC_000328   | 2 | 0 | 0 | 0 |
| Ppp1r15b      | 2 | 0 | 0 | 0 |
| Plekha6       | 2 | 0 | 0 | 0 |
| Etnk2         | 4 | 0 | 0 | 0 |
| Fmod          | 2 | 0 | 0 | 0 |
| Chit1         | 1 | 0 | 0 | 0 |
| Chi3l1        | 5 | 0 | 0 | 0 |
| Cyb5r1        | 5 | 0 | 0 | 0 |
| Adipor1       | 5 | 0 | 0 | 0 |
| Klhl12        | 1 | 0 | 0 | 0 |
| Kdm5b         | 3 | 0 | 0 | 0 |
| Syt2          | 3 | 0 | 0 | 0 |
| Ube2t         | 2 | 0 | 0 | 0 |
| Arl8a         | 4 | 0 | 0 | 0 |
| Csrp1         | 4 | 0 | 0 | 0 |
| Phlda3        | 2 | 0 | 0 | 0 |
| Tmem9         | 2 | 0 | 0 | 0 |
| Kif21b        | 6 | 0 | 0 | 0 |
| XLOC_000355   | 2 | 0 | 0 | 0 |
| Ddx59         | 2 | 0 | 0 | 0 |
| Zfp281        | 2 | 0 | 0 | 0 |

|               |    |   |   |   |
|---------------|----|---|---|---|
| XLOC_000358   | 6  | 0 | 0 | 0 |
| Dennd1b       | 7  | 0 | 0 | 0 |
| Zbtb41        | 4  | 0 | 0 | 0 |
| Uchl5         | 5  | 0 | 0 | 0 |
| Tpr           | 2  | 0 | 0 | 0 |
| Ska2l-ps      | 1  | 0 | 0 | 0 |
| 1190005F20Rik | 3  | 0 | 0 | 0 |
| Fam129a       | 1  | 0 | 0 | 0 |
| Niban         | 2  | 0 | 0 | 0 |
| Edem3         | 3  | 0 | 0 | 0 |
| Glt25d2       | 5  | 0 | 0 | 0 |
| XLOC_000377   | 2  | 0 | 0 | 0 |
| Nmnat2        | 1  | 0 | 0 | 0 |
| mKIAA0479     | 2  | 0 | 0 | 0 |
| 1700012A16Rik | 1  | 0 | 0 | 0 |
| Rgs8          | 7  | 0 | 0 | 0 |
| XLOC_000383   | 2  | 0 | 0 | 0 |
| Rgs16         | 1  | 0 | 0 | 0 |
| Rnasel        | 7  | 0 | 0 | 0 |
| Glul          | 3  | 0 | 0 | 0 |
| XLOC_000387   | 3  | 0 | 0 | 0 |
| Stx6          | 2  | 0 | 0 | 0 |
| Acbd6         | 2  | 0 | 0 | 0 |
| Tor1aip2      | 6  | 0 | 0 | 0 |
| Gm2000        | 1  | 0 | 0 | 0 |
| XLOC_000397   | 2  | 0 | 0 | 0 |
| 2810025M15Rik | 1  | 0 | 0 | 0 |
| BC026585      | 6  | 0 | 0 | 0 |
| Sec16b        | 11 | 0 | 0 | 0 |
| Astn1         | 2  | 0 | 0 | 0 |
| Rfwd2         | 13 | 0 | 0 | 0 |
| 4930523C07Rik | 4  | 0 | 0 | 0 |
| Mrps14        | 1  | 0 | 0 | 0 |
| Rc3h1         | 3  | 0 | 0 | 0 |
| Gas5          | 3  | 0 | 0 | 0 |
| Ankrd45       | 9  | 0 | 0 | 0 |
| Pigc          | 3  | 0 | 0 | 0 |
| Vamp4         | 5  | 0 | 0 | 0 |
| XLOC_000413   | 1  | 0 | 0 | 0 |
| Myoc          | 1  | 0 | 0 | 0 |
| Kifap3        | 4  | 0 | 0 | 0 |
| Scyl3         | 9  | 0 | 0 | 0 |
| 2810422O20Rik | 2  | 0 | 0 | 0 |
| 4930455F23Rik | 2  | 0 | 0 | 0 |
| Gpr161        | 3  | 0 | 0 | 0 |
| Brp44         | 1  | 0 | 0 | 0 |
| Creg1         | 3  | 0 | 0 | 0 |

|               |   |   |   |   |
|---------------|---|---|---|---|
| Tada1         | 3 | 0 | 0 | 0 |
| Fam78b        | 2 | 0 | 0 | 0 |
| Tmco1         | 1 | 0 | 0 | 0 |
| Aldh9a1       | 3 | 0 | 0 | 0 |
| Rxrg          | 5 | 0 | 0 | 0 |
| Rgs5          | 2 | 0 | 0 | 0 |
| 1700084C01Rik | 3 | 0 | 0 | 0 |
| AK014177      | 2 | 0 | 0 | 0 |
| Olfml2b       | 1 | 0 | 0 | 0 |
| 1700009P17Rik | 5 | 0 | 0 | 0 |
| Mpz           | 1 | 0 | 0 | 0 |
| Apoa2         | 1 | 0 | 0 | 0 |
| Adamts4       | 2 | 0 | 0 | 0 |
| B4galt3       | 1 | 0 | 0 | 0 |
| Dedd          | 3 | 0 | 0 | 0 |
| Pvrl4         | 4 | 0 | 0 | 0 |
| Usf1          | 6 | 0 | 0 | 0 |
| F11r          | 2 | 0 | 0 | 0 |
| Refbp2        | 1 | 0 | 0 | 0 |
| Cd84          | 3 | 0 | 0 | 0 |
| Copa          | 6 | 0 | 0 | 0 |
| Pex19         | 1 | 0 | 0 | 0 |
| Dcaf8         | 2 | 0 | 0 | 0 |
| Kcnj10        | 1 | 0 | 0 | 0 |
| Pigm          | 1 | 0 | 0 | 0 |
| Slamf9        | 2 | 0 | 0 | 0 |
| Igsf9         | 9 | 0 | 0 | 0 |
| Tagln2        | 4 | 0 | 0 | 0 |
| Aim2          | 6 | 0 | 0 | 0 |
| Pydc3         | 2 | 0 | 0 | 0 |
| Fmn2          | 2 | 0 | 0 | 0 |
| Sdccag8       | 2 | 0 | 0 | 0 |
| Zfp238        | 2 | 0 | 0 | 0 |
| rp58          | 3 | 0 | 0 | 0 |
| Pppde1        | 7 | 0 | 0 | 0 |
| Kif26b        | 4 | 0 | 0 | 0 |
| Sccpdh        | 2 | 0 | 0 | 0 |
| Cdc42bpa      | 5 | 0 | 0 | 0 |
| XLOC_000490   | 2 | 0 | 0 | 0 |
| XLOC_000491   | 2 | 0 | 0 | 0 |
| Itpkb         | 9 | 0 | 0 | 0 |
| Parp1         | 3 | 0 | 0 | 0 |
| Lin9          | 3 | 0 | 0 | 0 |
| Acbd3         | 1 | 0 | 0 | 0 |
| BC031781      | 1 | 0 | 0 | 0 |
| Pycr2         | 2 | 0 | 0 | 0 |
| Tmem63a       | 5 | 0 | 0 | 0 |



|               |   |   |   |   |
|---------------|---|---|---|---|
| Cnih4         | 3 | 0 | 0 | 0 |
| A430110L20Rik | 1 | 0 | 0 | 0 |
| XLOC_000503   | 1 | 0 | 0 | 0 |
| Cnih3         | 4 | 0 | 0 | 0 |
| Srp9          | 3 | 0 | 0 | 0 |
| Susd4         | 5 | 0 | 0 | 0 |
| Tlr5          | 8 | 0 | 0 | 0 |
| XLOC_000512   | 2 | 0 | 0 | 0 |
| Dusp10        | 1 | 0 | 0 | 0 |
| XLOC_000515   | 2 | 0 | 0 | 0 |
| XLOC_000516   | 5 | 0 | 0 | 0 |
| Rab3gap2      | 3 | 0 | 0 | 0 |
| Eprs          | 7 | 0 | 0 | 0 |
| Esrrg         | 5 | 0 | 0 | 0 |
| Ptpn14        | 2 | 0 | 0 | 0 |
| Angel2        | 6 | 0 | 0 | 0 |
| Nsl1          | 2 | 0 | 0 | 0 |
| XLOC_000533   | 3 | 0 | 0 | 0 |
| Tmem206       | 1 | 0 | 0 | 0 |
| Lpgat1        | 5 | 0 | 0 | 0 |
| Slc30a1       | 2 | 0 | 0 | 0 |
| Gm10516       | 4 | 0 | 0 | 0 |
| Kcnh1         | 3 | 0 | 0 | 0 |
| Irf6          | 2 | 0 | 0 | 0 |
| A130010J15Rik | 2 | 0 | 0 | 0 |
| Plxna2        | 4 | 0 | 0 | 0 |
| Cd34          | 3 | 0 | 0 | 0 |
| Xkr4          | 3 | 0 | 0 | 0 |
| Mrpl15        | 3 | 0 | 0 | 0 |
| Gm6104        | 1 | 0 | 0 | 0 |
| Rgs20         | 2 | 0 | 0 | 0 |
| 2610203C22Rik | 6 | 0 | 0 | 0 |
| Mybl1         | 5 | 0 | 0 | 0 |
| Vcpip1        | 1 | 0 | 0 | 0 |
| Snhg6         | 3 | 0 | 0 | 0 |
| Cops5         | 2 | 0 | 0 | 0 |
| Arfgef1       | 3 | 0 | 0 | 0 |
| Ncoa2         | 7 | 0 | 0 | 0 |
| Tram1         | 3 | 0 | 0 | 0 |
| Lactb2        | 3 | 0 | 0 | 0 |
| Msc           | 2 | 0 | 0 | 0 |
| Gm106         | 2 | 0 | 0 | 0 |
| AK015384      | 5 | 0 | 0 | 0 |
| Stau2         | 6 | 0 | 0 | 0 |
| Tceb1         | 5 | 0 | 0 | 0 |
| Jph1          | 3 | 0 | 0 | 0 |
| XLOC_000593   | 2 | 0 | 0 | 0 |

|               |    |   |   |   |
|---------------|----|---|---|---|
| Mcm3          | 2  | 0 | 0 | 0 |
| Gm7658        | 1  | 0 | 0 | 0 |
| mKIAA0340     | 1  | 0 | 0 | 0 |
| Ogfrl1        | 5  | 0 | 0 | 0 |
| 1110058L19Rik | 1  | 0 | 0 | 0 |
| Bai3          | 9  | 0 | 0 | 0 |
| Phf3          | 8  | 0 | 0 | 0 |
| Bag2          | 2  | 0 | 0 | 0 |
| Zfp451        | 4  | 0 | 0 | 0 |
| Gm15455       | 1  | 0 | 0 | 0 |
| Bend6         | 4  | 0 | 0 | 0 |
| Fam168b       | 3  | 0 | 0 | 0 |
| Uggt1         | 7  | 0 | 0 | 0 |
| Neur13        | 5  | 0 | 0 | 0 |
| 4632411B12Rik | 4  | 0 | 0 | 0 |
| Lman2l        | 4  | 0 | 0 | 0 |
| Sema4c        | 12 | 0 | 0 | 0 |
| Actr1b        | 5  | 0 | 0 | 0 |
| Tmem131       | 5  | 0 | 0 | 0 |
| 6330578E17Rik | 4  | 0 | 0 | 0 |
| Mgat4a        | 6  | 0 | 0 | 0 |
| Tsga10        | 8  | 0 | 0 | 0 |
| Mitd1         | 2  | 0 | 0 | 0 |
| Txndc9        | 6  | 0 | 0 | 0 |
| Aff3          | 9  | 0 | 0 | 0 |
| Lonrf2        | 1  | 0 | 0 | 0 |
| Chst10        | 7  | 0 | 0 | 0 |
| Tbc1d8        | 2  | 0 | 0 | 0 |
| Creg2         | 3  | 0 | 0 | 0 |
| AK041998      | 3  | 0 | 0 | 0 |
| XLOC_000651   | 1  | 0 | 0 | 0 |
| Mfsd9         | 3  | 0 | 0 | 0 |
| Tgfbrap1      | 6  | 0 | 0 | 0 |
| Fhl2          | 2  | 0 | 0 | 0 |
| Uxs1          | 7  | 0 | 0 | 0 |
| 1700029F09Rik | 5  | 0 | 0 | 0 |
| Kdelc1        | 3  | 0 | 0 | 0 |
| Col5a2        | 4  | 0 | 0 | 0 |
| Slc40a1       | 2  | 0 | 0 | 0 |
| Slc39a10      | 5  | 0 | 0 | 0 |
| Obfc2a        | 2  | 0 | 0 | 0 |
| Myo1b         | 3  | 0 | 0 | 0 |
| Gls           | 2  | 0 | 0 | 0 |
| Nab1          | 2  | 0 | 0 | 0 |
| Mfsd6         | 6  | 0 | 0 | 0 |
| Inpp1         | 5  | 0 | 0 | 0 |
| Pms1          | 6  | 0 | 0 | 0 |

|               |       |   |   |   |
|---------------|-------|---|---|---|
| Asnsd1        | 1     | 0 | 0 | 0 |
| AK038423      | 2     | 0 | 0 | 0 |
| Stk17b        | 1     | 0 | 0 | 0 |
| Hecw2         | 7     | 0 | 0 | 0 |
| Sf3b1         | 4     | 0 | 0 | 0 |
| Rftn2         | 1     | 0 | 0 | 0 |
| Kctd18        | 6     | 0 | 0 | 0 |
| Clk1          | 7     | 0 | 0 | 0 |
| Orc2          | 1     | 0 | 0 | 0 |
| Trak2         | 6     | 0 | 0 | 0 |
| Als2cr4       | 3     | 0 | 0 | 0 |
| Mpp4          | 2     | 0 | 0 | 0 |
| Als2          | 4     | 0 | 0 | 0 |
| Sumo1         | 4     | 0 | 0 | 0 |
| Ica1l         | 8     | 0 | 0 | 0 |
| Wdr12         | 6     | 0 | 0 | 0 |
| Raph1         | 4     | 0 | 0 | 0 |
| Ndufs1        | 3     | 0 | 0 | 0 |
| Gpr1          | 2     | 0 | 0 | 0 |
| Dytn          | 2     | 0 | 0 | 0 |
| Mdh1b         | 2     | 0 | 0 | 0 |
| XLOC_000719   | 1     | 0 | 0 | 0 |
| Klf7          | 7     | 0 | 0 | 0 |
| Fam119a       | 3     | 0 | 0 | 0 |
| AK013046      | 1     | 0 | 0 | 0 |
| Fzd5          | 1     | 0 | 0 | 0 |
| Plekhm3       | 4     | 0 | 0 | 0 |
| Rpl10a-ps1    | 1     | 0 | 0 | 0 |
| D630023F18Rik | 4     | 0 | 0 | 0 |
| Acadl         | 3     | 0 | 0 | 0 |
| Lancl1        | 2     | 0 | 0 | 0 |
| Bard1         | 5     | 0 | 0 | 0 |
| Mreg          | 2     | 0 | 0 | 0 |
| Pecr          | 1     | 0 | 0 | 0 |
|               | 41702 | 1 | 0 | 0 |
| Igfbp5        | 1     | 0 | 0 | 0 |
| Tns1          | 12    | 0 | 0 | 0 |
| Aamp          | 5     | 0 | 0 | 0 |
| Tmbim1        | 5     | 0 | 0 | 0 |
| Usp37         | 6     | 0 | 0 | 0 |
| Rnf25         | 6     | 0 | 0 | 0 |
| Cryba2        | 1     | 0 | 0 | 0 |
| 1810031K17Rik | 2     | 0 | 0 | 0 |
| Abcb6         | 3     | 0 | 0 | 0 |
| Atg9a         | 9     | 0 | 0 | 0 |
| Glb1l         | 2     | 0 | 0 | 0 |
| Ptprn         | 10    | 0 | 0 | 0 |

|               |    |   |   |   |
|---------------|----|---|---|---|
| Resp18        | 1  | 0 | 0 | 0 |
| Dnpep         | 5  | 0 | 0 | 0 |
| Obsl1         | 6  | 0 | 0 | 0 |
| Epha4         | 3  | 0 | 0 | 0 |
| XLOC_000763   | 1  | 0 | 0 | 0 |
| Farsb         | 2  | 0 | 0 | 0 |
| Scg2          | 4  | 0 | 0 | 0 |
| Ap1s3         | 1  | 0 | 0 | 0 |
| Wdfy1         | 5  | 0 | 0 | 0 |
| Cul3          | 3  | 0 | 0 | 0 |
| Dock10        | 7  | 0 | 0 | 0 |
| Irs1          | 2  | 0 | 0 | 0 |
| Sphkap        | 3  | 0 | 0 | 0 |
| Pid1          | 2  | 0 | 0 | 0 |
| Dner          | 2  | 0 | 0 | 0 |
| Trip12        | 12 | 0 | 0 | 0 |
| Sp110         | 7  | 0 | 0 | 0 |
| A630001G21Rik | 3  | 0 | 0 | 0 |
| Ncl           | 4  | 0 | 0 | 0 |
| Nmur1         | 3  | 0 | 0 | 0 |
| Pde6d         | 2  | 0 | 0 | 0 |
| Gm6136        | 1  | 0 | 0 | 0 |
| Ngef          | 2  | 0 | 0 | 0 |
| Usp40         | 3  | 0 | 0 | 0 |
| Hjurp         | 5  | 0 | 0 | 0 |
| Arl4c         | 1  | 0 | 0 | 0 |
| Col6a3        | 8  | 0 | 0 | 0 |
| Ilkap         | 5  | 0 | 0 | 0 |
| Hes6          | 1  | 0 | 0 | 0 |
| Hdac4         | 10 | 0 | 0 | 0 |
| Ndufa10       | 2  | 0 | 0 | 0 |
| Myeov2        | 4  | 0 | 0 | 0 |
| XLOC_000808   | 1  | 0 | 0 | 0 |
| Kif1a         | 14 | 0 | 0 | 0 |
| Mterfd2       | 1  | 0 | 0 | 0 |
| Hdlbp         | 7  | 0 | 0 | 0 |
| Stk25         | 6  | 0 | 0 | 0 |
| Thap4         | 2  | 0 | 0 | 0 |
| St8sia4       | 2  | 0 | 0 | 0 |
| Slco6c1       | 1  | 0 | 0 | 0 |
| D1Ertd622e    | 4  | 0 | 0 | 0 |
| Pam           | 7  | 0 | 0 | 0 |
| Kdsr          | 1  | 0 | 0 | 0 |
| Vps4b         | 3  | 0 | 0 | 0 |
| XLOC_000841   | 4  | 0 | 0 | 0 |
| XLOC_000842   | 3  | 0 | 0 | 0 |
| AK043174      | 1  | 0 | 0 | 0 |

|               |    |   |   |   |
|---------------|----|---|---|---|
| Tsn           | 4  | 0 | 0 | 0 |
| Inhbb         | 3  | 0 | 0 | 0 |
| Ralb          | 6  | 0 | 0 | 0 |
| Ptpn4         | 8  | 0 | 0 | 0 |
| XLOC_000851   | 1  | 0 | 0 | 0 |
| Tmem177       | 3  | 0 | 0 | 0 |
| Tmem37        | 1  | 0 | 0 | 0 |
| Steap3        | 2  | 0 | 0 | 0 |
| Insig2        | 4  | 0 | 0 | 0 |
| XLOC_000856   | 3  | 0 | 0 | 0 |
| Htr5b         | 2  | 0 | 0 | 0 |
| Ddx18         | 12 | 0 | 0 | 0 |
| Dpp10         | 5  | 0 | 0 | 0 |
| Lypd1         | 4  | 0 | 0 | 0 |
| Tmem163       | 3  | 0 | 0 | 0 |
| Zranb3        | 6  | 0 | 0 | 0 |
| Mcm6          | 2  | 0 | 0 | 0 |
| Dars          | 1  | 0 | 0 | 0 |
| Cxcr4         | 2  | 0 | 0 | 0 |
| Gm15790       | 1  | 0 | 0 | 0 |
| Mapkapk2      | 2  | 0 | 0 | 0 |
| Dyrk3         | 3  | 0 | 0 | 0 |
| Rassf5        | 5  | 0 | 0 | 0 |
| Srgap2        | 7  | 0 | 0 | 0 |
| Mfsd4         | 1  | 0 | 0 | 0 |
| Cdk18         | 1  | 0 | 0 | 0 |
| Tmcc2         | 3  | 0 | 0 | 0 |
| Cntn2         | 6  | 0 | 0 | 0 |
| Nfasc         | 6  | 0 | 0 | 0 |
| Mdm4          | 8  | 0 | 0 | 0 |
| Sox13         | 8  | 0 | 0 | 0 |
| Snrpe         | 4  | 0 | 0 | 0 |
| Atp2b4        | 6  | 0 | 0 | 0 |
| Btg2          | 1  | 0 | 0 | 0 |
| Adora1        | 7  | 0 | 0 | 0 |
| Ppfia4        | 5  | 0 | 0 | 0 |
| Ppp1r12b      | 3  | 0 | 0 | 0 |
| Gpr37l1       | 1  | 0 | 0 | 0 |
| Rnpep         | 3  | 0 | 0 | 0 |
| Timm17a       | 1  | 0 | 0 | 0 |
| Shisa4        | 9  | 0 | 0 | 0 |
| Ipo9          | 3  | 0 | 0 | 0 |
| Nav1          | 10 | 0 | 0 | 0 |
| Camsap11      | 6  | 0 | 0 | 0 |
| Nek7          | 3  | 0 | 0 | 0 |
| 2310009B15Rik | 3  | 0 | 0 | 0 |
| Cfh           | 2  | 0 | 0 | 0 |

|               |   |   |   |   |
|---------------|---|---|---|---|
| Cdc73         | 1 | 0 | 0 | 0 |
| Trove2        | 3 | 0 | 0 | 0 |
| Rgs2          | 1 | 0 | 0 | 0 |
| BC003331      | 1 | 0 | 0 | 0 |
| 1200016B10Rik | 2 | 0 | 0 | 0 |
| Rnf2          | 3 | 0 | 0 | 0 |
| Tsen15        | 4 | 0 | 0 | 0 |
| Rgl1          | 6 | 0 | 0 | 0 |
| Smg7          | 4 | 0 | 0 | 0 |
| Lamc2         | 6 | 0 | 0 | 0 |
| Lamc1         | 3 | 0 | 0 | 0 |
| Dhx9          | 5 | 0 | 0 | 0 |
| Npl           | 3 | 0 | 0 | 0 |
| Ier5          | 1 | 0 | 0 | 0 |
| Mr1           | 4 | 0 | 0 | 0 |
| BC034090      | 9 | 0 | 0 | 0 |
| Xpr1          | 4 | 0 | 0 | 0 |
| Cep350        | 7 | 0 | 0 | 0 |
| Lap1B         | 2 | 0 | 0 | 0 |
| Fam163a       | 5 | 0 | 0 | 0 |
| Tdrd5         | 3 | 0 | 0 | 0 |
| Fam20b        | 6 | 0 | 0 | 0 |
| Ralgps2       | 7 | 0 | 0 | 0 |
| XLOC_000970   | 1 | 0 | 0 | 0 |
| Fam5b         | 5 | 0 | 0 | 0 |
| Pappa2        | 5 | 0 | 0 | 0 |
| Cacybp        | 3 | 0 | 0 | 0 |
| Dars2         | 4 | 0 | 0 | 0 |
| Klhl20        | 2 | 0 | 0 | 0 |
| Prdx6         | 3 | 0 | 0 | 0 |
| A1848100      | 8 | 0 | 0 | 0 |
| Dnm3          | 4 | 0 | 0 | 0 |
| Mettl13       | 2 | 0 | 0 | 0 |
| Prrc2c        | 8 | 0 | 0 | 0 |
| Fmo4          | 7 | 0 | 0 | 0 |
| Fmo1          | 7 | 0 | 0 | 0 |
| Gorab         | 3 | 0 | 0 | 0 |
| Blzf1         | 4 | 0 | 0 | 0 |
| Atp1b1        | 7 | 0 | 0 | 0 |
| Xcl1          | 1 | 0 | 0 | 0 |
| Sft2d2        | 3 | 0 | 0 | 0 |
| Tiprl         | 6 | 0 | 0 | 0 |
| Dcaf6         | 3 | 0 | 0 | 0 |
| Mpzl1         | 4 | 0 | 0 | 0 |
| Dusp27        | 4 | 0 | 0 | 0 |
| Pogk          | 3 | 0 | 0 | 0 |
| XLOC_001011   | 1 | 0 | 0 | 0 |

|         |    |   |   |   |
|---------|----|---|---|---|
| Uck2    | 5  | 0 | 0 | 0 |
| Mgst3   | 2  | 0 | 0 | 0 |
| Pbx1    | 7  | 0 | 0 | 0 |
| Rgs4    | 9  | 0 | 0 | 0 |
| Hsd17b7 | 3  | 0 | 0 | 0 |
| Ddr2    | 5  | 0 | 0 | 0 |
| Uap1    | 4  | 0 | 0 | 0 |
| Uhmk1   | 5  | 0 | 0 | 0 |
| Gm7694  | 1  | 0 | 0 | 0 |
| Atf6    | 4  | 0 | 0 | 0 |
| Dusp12  | 2  | 0 | 0 | 0 |
| Sdhc    | 3  | 0 | 0 | 0 |
| Pcp4l1  | 4  | 0 | 0 | 0 |
| Tomm40l | 3  | 0 | 0 | 0 |
| Ndufs2  | 5  | 0 | 0 | 0 |
| Ppox    | 6  | 0 | 0 | 0 |
| Usp21   | 4  | 0 | 0 | 0 |
| Nit1    | 1  | 0 | 0 | 0 |
| Klhdc9  | 1  | 0 | 0 | 0 |
| Ly9     | 7  | 0 | 0 | 0 |
| Vangl2  | 3  | 0 | 0 | 0 |
| Ncstn   | 2  | 0 | 0 | 0 |
| Pea15a  | 4  | 0 | 0 | 0 |
| Atp1a2  | 3  | 0 | 0 | 0 |
| Kcnj9   | 3  | 0 | 0 | 0 |
| Dusp23  | 1  | 0 | 0 | 0 |
| Cadm3   | 5  | 0 | 0 | 0 |
| Grem2   | 2  | 0 | 0 | 0 |
| Rgs7    | 9  | 0 | 0 | 0 |
| Fh1     | 1  | 0 | 0 | 0 |
| Opn3    | 3  | 0 | 0 | 0 |
| Pld5    | 9  | 0 | 0 | 0 |
| Cep170  | 8  | 0 | 0 | 0 |
| Akt3    | 7  | 0 | 0 | 0 |
| Hnrnpu  | 5  | 0 | 0 | 0 |
| Smyd3   | 11 | 0 | 0 | 0 |
| Tfb2m   | 6  | 0 | 0 | 0 |
| Psen2   | 2  | 0 | 0 | 0 |
| H3f3a   | 4  | 0 | 0 | 0 |
| Ephx1   | 4  | 0 | 0 | 0 |
| Nvl     | 4  | 0 | 0 | 0 |
| Wdr26   | 2  | 0 | 0 | 0 |
| Ccdc121 | 1  | 0 | 0 | 0 |
| Lbr     | 2  | 0 | 0 | 0 |
| Degs1   | 4  | 0 | 0 | 0 |
| Fbxo28  | 2  | 0 | 0 | 0 |
| Capn2   | 11 | 0 | 0 | 0 |

|               |   |   |   |   |
|---------------|---|---|---|---|
| Hlx           | 2 | 0 | 0 | 0 |
| Mosc2         | 1 | 0 | 0 | 0 |
| C130074G19Rik | 1 | 0 | 0 | 0 |
| Mark1         | 4 | 0 | 0 | 0 |
| Iars2         | 2 | 0 | 0 | 0 |
| Lyplal1       | 2 | 0 | 0 | 0 |
| Rrp15         | 2 | 0 | 0 | 0 |
| Spata17       | 1 | 0 | 0 | 0 |
| Kcnk2         | 6 | 0 | 0 | 0 |
| Smyd2         | 3 | 0 | 0 | 0 |
| Rps6kc1       | 9 | 0 | 0 | 0 |
| Vash2         | 4 | 0 | 0 | 0 |
| Mfsd7b        | 6 | 0 | 0 | 0 |
| Tatdn3        | 8 | 0 | 0 | 0 |
| Atf3          | 7 | 0 | 0 | 0 |
| Nenf          | 4 | 0 | 0 | 0 |
| Rcor3         | 8 | 0 | 0 | 0 |
| Sertad4       | 4 | 0 | 0 | 0 |
| Syt14         | 5 | 0 | 0 | 0 |
| AA408296      | 7 | 0 | 0 | 0 |
| Hsd11b1       | 2 | 0 | 0 | 0 |
| G0s2          | 2 | 0 | 0 | 0 |
| Camk1g        | 1 | 0 | 0 | 0 |
| Cr1l          | 3 | 0 | 0 | 0 |
| Tcea1         | 7 | 0 | 0 | 0 |
| Ptpn18        | 3 | 0 | 0 | 0 |
| Bivm          | 7 | 0 | 0 | 0 |
| XLOC_000094   | 1 | 0 | 0 | 0 |
| 9430016H08Rik | 1 | 0 | 0 | 0 |
| Gm15464       | 1 | 0 | 0 | 0 |
| XLOC_000135   | 1 | 0 | 0 | 0 |
| AK084284      | 5 | 0 | 0 | 0 |
| Rpl37a        | 2 | 0 | 0 | 0 |
| mKIAA0173     | 1 | 0 | 0 | 0 |
| XLOC_000177   | 4 | 0 | 0 | 0 |
| AK006434      | 3 | 0 | 0 | 0 |
| Gigyf2        | 4 | 0 | 0 | 0 |
| AK007349      | 1 | 0 | 0 | 0 |
| AK144617      | 2 | 0 | 0 | 0 |
| XLOC_000287   | 1 | 0 | 0 | 0 |
| XLOC_000306   | 2 | 0 | 0 | 0 |
| AA986860      | 2 | 0 | 0 | 0 |
| Fam72a        | 1 | 0 | 0 | 0 |
| Rab7b         | 1 | 0 | 0 | 0 |
| Mybph         | 1 | 0 | 0 | 0 |
| Tnni1         | 4 | 0 | 0 | 0 |
| Ncf2          | 7 | 0 | 0 | 0 |



|                    |   |   |   |   |
|--------------------|---|---|---|---|
| Cenpl              | 3 | 0 | 0 | 0 |
| AK042927           | 7 | 0 | 0 | 0 |
| XLOC_000434        | 1 | 0 | 0 | 0 |
| AK014032           | 1 | 0 | 0 | 0 |
| Nr1i3              | 3 | 0 | 0 | 0 |
| EG545391           | 4 | 0 | 0 | 0 |
| Fam36a             | 1 | 0 | 0 | 0 |
| XLOC_000504        | 4 | 0 | 0 | 0 |
| Bpnt1              | 1 | 0 | 0 | 0 |
| XLOC_000522        | 1 | 0 | 0 | 0 |
| XLOC_000544        | 1 | 0 | 0 | 0 |
| mKIAA1889          | 1 | 0 | 0 | 0 |
| 4732440D04Rik      | 1 | 0 | 0 | 0 |
| Rpl7               | 4 | 0 | 0 | 0 |
| Ube2w              | 3 | 0 | 0 | 0 |
| 6720483E21Rik      | 2 | 0 | 0 | 0 |
| XLOC_000599        | 1 | 0 | 0 | 0 |
| Ccdc115            | 3 | 0 | 0 | 0 |
| Ankrd39            | 3 | 0 | 0 | 0 |
| Rnf149             | 3 | 0 | 0 | 0 |
| Gm3940             | 1 | 0 | 0 | 0 |
| Gm11575            | 1 | 0 | 0 | 0 |
| Ino80d             | 5 | 0 | 0 | 0 |
| XLOC_000750        | 1 | 0 | 0 | 0 |
| Nhej1              | 2 | 0 | 0 | 0 |
| Tuba4a             | 2 | 0 | 0 | 0 |
| Chpf               | 1 | 0 | 0 | 0 |
| AK017177           | 2 | 0 | 0 | 0 |
| Pask               | 6 | 0 | 0 | 0 |
| Ppip5k2            | 8 | 0 | 0 | 0 |
| XLOC_000829        | 1 | 0 | 0 | 0 |
| Gm8080             | 1 | 0 | 0 | 0 |
| Dsel               | 3 | 0 | 0 | 0 |
| Actr3              | 5 | 0 | 0 | 0 |
| Pfkfb2             | 7 | 0 | 0 | 0 |
| Tmem183a           | 5 | 0 | 0 | 0 |
| XLOC_000933        | 1 | 0 | 0 | 0 |
| 1700025G04Rik      | 1 | 0 | 0 | 0 |
| ENSMUSG00000073540 | 5 | 0 | 0 | 0 |
| Tor1aip1           | 1 | 0 | 0 | 0 |
| Tor3a              | 1 | 0 | 0 | 0 |
| Fmo2               | 4 | 0 | 0 | 0 |
| Nuf2               | 3 | 0 | 0 | 0 |
| Fcrlb              | 2 | 0 | 0 | 0 |
| Fcer1g             | 1 | 0 | 0 | 0 |
| Ufc1               | 3 | 0 | 0 | 0 |
| AK145253           | 4 | 0 | 0 | 0 |

|               |   |   |   |   |
|---------------|---|---|---|---|
| Mndal         | 2 | 0 | 0 | 0 |
| Hmga2-ps1     | 1 | 0 | 0 | 0 |
| Adck3         | 1 | 0 | 0 | 0 |
| XLOC_001077   | 3 | 0 | 0 | 0 |
| A730013G03Rik | 1 | 0 | 0 | 0 |
| Traf3ip3      | 3 | 0 | 0 | 0 |
| XLOC_001132   | 7 | 0 | 0 | 0 |
| XLOC_000031   | 1 | 0 | 0 | 0 |
| Zap70         | 3 | 0 | 0 | 0 |
| XLOC_000058   | 2 | 0 | 0 | 0 |
| XLOC_000078   | 1 | 0 | 0 | 0 |
| XLOC_000093   | 3 | 0 | 0 | 0 |
| XLOC_000145   | 2 | 0 | 0 | 0 |
| Ccnyl1        | 1 | 0 | 0 | 0 |
| Pnkd          | 1 | 0 | 0 | 0 |
| Stk16         | 4 | 0 | 0 | 0 |
| XLOC_000228   | 1 | 0 | 0 | 0 |
| Spp2          | 1 | 0 | 0 | 0 |
| Twist2        | 1 | 0 | 0 | 0 |
| Thsd7b        | 1 | 0 | 0 | 0 |
| XLOC_000360   | 1 | 0 | 0 | 0 |
| Aspm          | 2 | 0 | 0 | 0 |
| Ifrg15        | 1 | 0 | 0 | 0 |
| XLOC_000396   | 1 | 0 | 0 | 0 |
| XLOC_000402   | 2 | 0 | 0 | 0 |
| Dpt           | 1 | 0 | 0 | 0 |
| Fcgr4         | 1 | 0 | 0 | 0 |
| Pfdn2         | 2 | 0 | 0 | 0 |
| XLOC_000496   | 5 | 0 | 0 | 0 |
| 1700047M11Rik | 1 | 0 | 0 | 0 |
| AK020767      | 2 | 0 | 0 | 0 |
| AK145301      | 2 | 0 | 0 | 0 |
| XLOC_000584   | 1 | 0 | 0 | 0 |
| Tram2         | 6 | 0 | 0 | 0 |
| Kcnq5         | 5 | 0 | 0 | 0 |
| XLOC_000646   | 1 | 0 | 0 | 0 |
| 1110034B05Rik | 2 | 0 | 0 | 0 |
| XLOC_000721   | 1 | 0 | 0 | 0 |
| 1110028C15Rik | 3 | 0 | 0 | 0 |
| Zfp142        | 4 | 0 | 0 | 0 |
| XLOC_000751   | 1 | 0 | 0 | 0 |
| Col4a4        | 3 | 0 | 0 | 0 |
| Slc16a14      | 3 | 0 | 0 | 0 |
| Lax1          | 1 | 0 | 0 | 0 |
| 9230116N13Rik | 2 | 0 | 0 | 0 |
| Ptprc         | 2 | 0 | 0 | 0 |
| Gm15443       | 1 | 0 | 0 | 0 |

|               |   |   |   |   |
|---------------|---|---|---|---|
| Pla2g4a       | 1 | 0 | 0 | 0 |
| AK029630      | 1 | 0 | 0 | 0 |
| XLOC_000964   | 1 | 0 | 0 | 0 |
| Prrx1         | 4 | 0 | 0 | 0 |
| Slamf8        | 2 | 0 | 0 | 0 |
| Gm16340       | 3 | 0 | 0 | 0 |
| XLOC_001063   | 1 | 0 | 0 | 0 |
| Ppp2r5a       | 3 | 0 | 0 | 0 |
| XLOC_001127   | 2 | 0 | 0 | 0 |
| CD46          | 4 | 0 | 0 | 0 |
| XLOC_000049   | 1 | 0 | 0 | 0 |
| Sdpr          | 2 | 0 | 0 | 0 |
| XLOC_000097   | 1 | 0 | 0 | 0 |
| Accn4         | 2 | 0 | 0 | 0 |
| Heatr7b1      | 1 | 0 | 0 | 0 |
| AK039635      | 1 | 0 | 0 | 0 |
| Serpinb12     | 2 | 0 | 0 | 0 |
| Tmem185b      | 1 | 0 | 0 | 0 |
| Eif2d         | 2 | 0 | 0 | 0 |
| XLOC_000376   | 2 | 0 | 0 | 0 |
| Lefty1        | 1 | 0 | 0 | 0 |
| XLOC_000505   | 1 | 0 | 0 | 0 |
| XLOC_000509   | 2 | 0 | 0 | 0 |
| XLOC_000517   | 2 | 0 | 0 | 0 |
| AK021325      | 3 | 0 | 0 | 0 |
| AK142999      | 1 | 0 | 0 | 0 |
| Pkhd1         | 1 | 0 | 0 | 0 |
| Smap1         | 4 | 0 | 0 | 0 |
| XLOC_000617   | 1 | 0 | 0 | 0 |
| XLOC_000619   | 1 | 0 | 0 | 0 |
| Kiaa1310      | 1 | 0 | 0 | 0 |
| 1700019D03Rik | 3 | 0 | 0 | 0 |
| Als2cr12      | 2 | 0 | 0 | 0 |
| Fn1           | 3 | 0 | 0 | 0 |
| AK043935      | 1 | 0 | 0 | 0 |
| Nr5a2         | 1 | 0 | 0 | 0 |
| XLOC_000935   | 1 | 0 | 0 | 0 |
| XLOC_000940   | 1 | 0 | 0 | 0 |
| AK044033      | 1 | 0 | 0 | 0 |
| XLOC_000971   | 2 | 0 | 0 | 0 |
| XLOC_001013   | 2 | 0 | 0 | 0 |
| Slamf7        | 1 | 0 | 0 | 0 |
| Gm4955        | 1 | 0 | 0 | 0 |
| Pydc4         | 1 | 0 | 0 | 0 |
| Ifi203        | 1 | 0 | 0 | 0 |
| AK046316      | 2 | 0 | 0 | 0 |
| 6330403A02Rik | 2 | 0 | 0 | 0 |

|               |   |   |   |   |
|---------------|---|---|---|---|
| 1700034H15Rik | 1 | 0 | 0 | 0 |
| C030002c11rik | 2 | 0 | 0 | 0 |
| XLOC_000023   | 1 | 0 | 0 | 0 |
| XLOC_000118   | 1 | 0 | 0 | 0 |
| XLOC_000126   | 1 | 0 | 0 | 0 |
| Wnt10a        | 1 | 0 | 0 | 0 |
| Fbxo36        | 2 | 0 | 0 | 0 |
| Sp140         | 1 | 0 | 0 | 0 |
| XLOC_000248   | 1 | 0 | 0 | 0 |
| Faim3         | 2 | 0 | 0 | 0 |
| XLOC_000430   | 1 | 0 | 0 | 0 |
| XLOC_000454   | 1 | 0 | 0 | 0 |
| XLOC_000483   | 1 | 0 | 0 | 0 |
| XLOC_000489   | 1 | 0 | 0 | 0 |
| nek2          | 1 | 0 | 0 | 0 |
| XLOC_000560   | 1 | 0 | 0 | 0 |
| Gm5828        | 1 | 0 | 0 | 0 |
| XLOC_000594   | 1 | 0 | 0 | 0 |
| Satb2         | 1 | 0 | 0 | 0 |
| Ikzf2         | 1 | 0 | 0 | 0 |
| Abca12        | 1 | 0 | 0 | 0 |
| AK079660      | 1 | 0 | 0 | 0 |
| A730008H23Rik | 1 | 0 | 0 | 0 |
| Otos          | 2 | 0 | 0 | 0 |
| Rgs18         | 2 | 0 | 0 | 0 |
| XLOC_000934   | 3 | 0 | 0 | 0 |
| XLOC_000938   | 1 | 0 | 0 | 0 |
| XLOC_001006   | 1 | 0 | 0 | 0 |
| BC056189      | 2 | 0 | 0 | 0 |
| XLOC_001081   | 1 | 0 | 0 | 0 |
| XLOC_000024   | 1 | 0 | 0 | 0 |
| Arhgef4       | 1 | 0 | 0 | 0 |
| XLOC_000104   | 1 | 0 | 0 | 0 |
| Sag           | 1 | 0 | 0 | 0 |
| XLOC_000390   | 1 | 0 | 0 | 0 |
| Angptl1       | 1 | 0 | 0 | 0 |
| XLOC_000554   | 1 | 0 | 0 | 0 |
| XLOC_000562   | 1 | 0 | 0 | 0 |
| XLOC_000653   | 1 | 0 | 0 | 0 |
| Csprs         | 1 | 0 | 0 | 0 |
| Dnajb3        | 1 | 0 | 0 | 0 |
| XLOC_000798   | 1 | 0 | 0 | 0 |
| XLOC_000813   | 1 | 0 | 0 | 0 |
| Lct           | 1 | 0 | 0 | 0 |
| Gm15675       | 1 | 0 | 0 | 0 |
| Cfhrb_4/2     | 1 | 0 | 0 | 0 |
| BC055324      | 1 | 0 | 0 | 0 |

|               |    |   |   |   |
|---------------|----|---|---|---|
| Nos1ap        | 1  | 0 | 0 | 0 |
| XLOC_001066   | 1  | 0 | 0 | 0 |
| XLOC_001087   | 1  | 0 | 0 | 0 |
| Cnksr3        | 2  | 0 | 0 | 0 |
| Mtrf1l        | 4  | 0 | 0 | 0 |
| Fbxo5         | 4  | 0 | 0 | 0 |
| Rmnd1         | 13 | 0 | 0 | 0 |
| Lrp11         | 3  | 0 | 0 | 0 |
| Katna1        | 1  | 0 | 0 | 0 |
| Ppil4         | 2  | 0 | 0 | 0 |
| XLOC_002193   | 5  | 0 | 0 | 0 |
| XLOC_002194   | 2  | 0 | 0 | 0 |
| Fbxo30        | 3  | 0 | 0 | 0 |
| Epm2a         | 3  | 0 | 0 | 0 |
| Plagl1        | 7  | 0 | 0 | 0 |
| Adat2         | 1  | 0 | 0 | 0 |
| Nmbr          | 1  | 0 | 0 | 0 |
| Txlnb         | 1  | 0 | 0 | 0 |
| Reps1         | 6  | 0 | 0 | 0 |
| Perp          | 2  | 0 | 0 | 0 |
| AK044491      | 4  | 0 | 0 | 0 |
| Ifngr1        | 3  | 0 | 0 | 0 |
| Map3k5        | 4  | 0 | 0 | 0 |
| Mtap7         | 12 | 0 | 0 | 0 |
| Gm6251        | 1  | 0 | 0 | 0 |
| Bclaf1        | 4  | 0 | 0 | 0 |
| Ahi1          | 4  | 0 | 0 | 0 |
| Hbs1l         | 4  | 0 | 0 | 0 |
| Raet1a        | 3  | 0 | 0 | 0 |
| 1110021L09Rik | 5  | 0 | 0 | 0 |
| Stx7          | 2  | 0 | 0 | 0 |
| Ctgf          | 2  | 0 | 0 | 0 |
| Med23         | 7  | 0 | 0 | 0 |
| 6330407J23Rik | 3  | 0 | 0 | 0 |
| 9330159F19Rik | 4  | 0 | 0 | 0 |
| Echdc1        | 2  | 0 | 0 | 0 |
| Hddc2         | 2  | 0 | 0 | 0 |
| Rsph4a        | 1  | 0 | 0 | 0 |
| Col10a1       | 1  | 0 | 0 | 0 |
| Hs3st5        | 5  | 0 | 0 | 0 |
| Hdac2         | 5  | 0 | 0 | 0 |
| AK040320      | 1  | 0 | 0 | 0 |
| Lama4         | 5  | 0 | 0 | 0 |
| Tube1         | 2  | 0 | 0 | 0 |
| Fyn           | 6  | 0 | 0 | 0 |
| Traf3ip2      | 1  | 0 | 0 | 0 |
| Rev3l         | 6  | 0 | 0 | 0 |

|               |    |   |   |   |
|---------------|----|---|---|---|
| AK166420      | 1  | 0 | 0 | 0 |
| Cdk19         | 4  | 0 | 0 | 0 |
| 9030224M15Rik | 3  | 0 | 0 | 0 |
| Wasf1         | 4  | 0 | 0 | 0 |
| Zbtb24        | 4  | 0 | 0 | 0 |
| Sesn1         | 3  | 0 | 0 | 0 |
| Snx3          | 2  | 0 | 0 | 0 |
| Ostm1         | 3  | 0 | 0 | 0 |
| Sec63         | 4  | 0 | 0 | 0 |
| Pdss2         | 1  | 0 | 0 | 0 |
| Bend3         | 2  | 0 | 0 | 0 |
| XLOC_002275   | 4  | 0 | 0 | 0 |
| Rtn4ip1       | 4  | 0 | 0 | 0 |
| Atg5          | 4  | 0 | 0 | 0 |
| Prep          | 3  | 0 | 0 | 0 |
| Popdc3        | 3  | 0 | 0 | 0 |
| Bves          | 2  | 0 | 0 | 0 |
| Hace1         | 3  | 0 | 0 | 0 |
| Ascc3         | 2  | 0 | 0 | 0 |
| Lilrb4        | 8  | 0 | 0 | 0 |
| Vgl2          | 2  | 0 | 0 | 0 |
| Nus1          | 3  | 0 | 0 | 0 |
| Slc35f1       | 3  | 0 | 0 | 0 |
| Pln           | 2  | 0 | 0 | 0 |
| Asf1a         | 1  | 0 | 0 | 0 |
| Msl3l2        | 2  | 0 | 0 | 0 |
| Gja1          | 3  | 0 | 0 | 0 |
| Fabp7         | 3  | 0 | 0 | 0 |
| Lims1         | 3  | 0 | 0 | 0 |
| Ranbp2        | 6  | 0 | 0 | 0 |
| Ccdc138       | 11 | 0 | 0 | 0 |
| P4ha1         | 6  | 0 | 0 | 0 |
| Cbara1        | 5  | 0 | 0 | 0 |
| Dnajb12       | 4  | 0 | 0 | 0 |
| Ascc1         | 2  | 0 | 0 | 0 |
| Spock2        | 5  | 0 | 0 | 0 |
| Pcbd1         | 1  | 0 | 0 | 0 |
| Lrrc20        | 8  | 0 | 0 | 0 |
| Ppa1          | 3  | 0 | 0 | 0 |
| Sar1a         | 2  | 0 | 0 | 0 |
| Tysnd1        | 2  | 0 | 0 | 0 |
| Aifm2         | 2  | 0 | 0 | 0 |
| Ass1          | 7  | 0 | 0 | 0 |
| Slc25a16      | 2  | 0 | 0 | 0 |
| Dna2          | 5  | 0 | 0 | 0 |
| Herc4         | 5  | 0 | 0 | 0 |
| Dnajc12       | 2  | 0 | 0 | 0 |

|               |    |   |   |   |
|---------------|----|---|---|---|
| Rtkn2         | 5  | 0 | 0 | 0 |
| Ccdc6         | 3  | 0 | 0 | 0 |
| AK009351      | 1  | 0 | 0 | 0 |
| Slc16a9       | 4  | 0 | 0 | 0 |
| Fam13c        | 4  | 0 | 0 | 0 |
| Ipmk          | 3  | 0 | 0 | 0 |
| Gm5778        | 1  | 0 | 0 | 0 |
| Gnaz          | 6  | 0 | 0 | 0 |
| Rab36         | 8  | 0 | 0 | 0 |
| Bcr           | 4  | 0 | 0 | 0 |
| Specc1l       | 5  | 0 | 0 | 0 |
| Upb1          | 3  | 0 | 0 | 0 |
| Snrpd3        | 2  | 0 | 0 | 0 |
| Ggt5          | 4  | 0 | 0 | 0 |
| Chchd10       | 1  | 0 | 0 | 0 |
| Zfp280b       | 3  | 0 | 0 | 0 |
| S100b         | 4  | 0 | 0 | 0 |
| Mcm3ap        | 2  | 0 | 0 | 0 |
| Lss           | 7  | 0 | 0 | 0 |
| Pttg1ip       | 1  | 0 | 0 | 0 |
| Sumo3         | 2  | 0 | 0 | 0 |
| Ube2g2        | 3  | 0 | 0 | 0 |
| C330046G03Rik | 6  | 0 | 0 | 0 |
| 1810043G02Rik | 3  | 0 | 0 | 0 |
| Cstb          | 1  | 0 | 0 | 0 |
| Ilvbl         | 3  | 0 | 0 | 0 |
| AK164315      | 2  | 0 | 0 | 0 |
| Slc1a6        | 5  | 0 | 0 | 0 |
| Gm16517       | 4  | 0 | 0 | 0 |
| Bsg           | 2  | 0 | 0 | 0 |
| Hcn2          | 3  | 0 | 0 | 0 |
| FLRG          | 1  | 0 | 0 | 0 |
| Palm          | 2  | 0 | 0 | 0 |
| 9130017N09Rik | 6  | 0 | 0 | 0 |
| XLOC_002395   | 2  | 0 | 0 | 0 |
| Ptbp1         | 11 | 0 | 0 | 0 |
| Wdr18         | 2  | 0 | 0 | 0 |
| Cnn2          | 2  | 0 | 0 | 0 |
| Hmha1         | 11 | 0 | 0 | 0 |
| Stk11         | 2  | 0 | 0 | 0 |
| Atp5d         | 4  | 0 | 0 | 0 |
| Cirbp         | 5  | 0 | 0 | 0 |
| Efna2         | 3  | 0 | 0 | 0 |
| Mum1          | 6  | 0 | 0 | 0 |
| Ndufs7        | 4  | 0 | 0 | 0 |
| Dazap1        | 3  | 0 | 0 | 0 |
| Rps15         | 5  | 0 | 0 | 0 |

|               |    |   |   |   |
|---------------|----|---|---|---|
| Apc2          | 4  | 0 | 0 | 0 |
| Reep6         | 4  | 0 | 0 | 0 |
| Scamp4        | 1  | 0 | 0 | 0 |
| Csnk1g2       | 4  | 0 | 0 | 0 |
| Sppl2b        | 6  | 0 | 0 | 0 |
| 3110056O03Rik | 1  | 0 | 0 | 0 |
| Gadd45b       | 1  | 0 | 0 | 0 |
| Thop1         | 1  | 0 | 0 | 0 |
| Map2k2        | 2  | 0 | 0 | 0 |
| XLOC_002427   | 1  | 0 | 0 | 0 |
| Zbtb7a        | 4  | 0 | 0 | 0 |
| Eef2          | 4  | 0 | 0 | 0 |
| Dapk3         | 1  | 0 | 0 | 0 |
| Zfr2          | 5  | 0 | 0 | 0 |
| Apba3         | 3  | 0 | 0 | 0 |
| Pip5k1c       | 2  | 0 | 0 | 0 |
| 2510012J08Rik | 1  | 0 | 0 | 0 |
| Tbxa2r        | 3  | 0 | 0 | 0 |
| F630110N24Rik | 1  | 0 | 0 | 0 |
| Dohh          | 5  | 0 | 0 | 0 |
| 2210404O07Rik | 4  | 0 | 0 | 0 |
| Aes           | 6  | 0 | 0 | 0 |
| Ankrd24       | 15 | 0 | 0 | 0 |
| XLOC_002448   | 2  | 0 | 0 | 0 |
| BC062115      | 6  | 0 | 0 | 0 |
| XLOC_002449   | 4  | 0 | 0 | 0 |
| AU041133      | 3  | 0 | 0 | 0 |
| Mif1          | 7  | 0 | 0 | 0 |
| Txnrd1        | 7  | 0 | 0 | 0 |
| Chst11        | 3  | 0 | 0 | 0 |
| A230046K03Rik | 5  | 0 | 0 | 0 |
| 1500009L16Rik | 4  | 0 | 0 | 0 |
| Tcp11l2       | 2  | 0 | 0 | 0 |
| Polr3b        | 2  | 0 | 0 | 0 |
| Ric8b         | 5  | 0 | 0 | 0 |
| A1597468      | 1  | 0 | 0 | 0 |
| Gm8394        | 1  | 0 | 0 | 0 |
| Btbd11        | 5  | 0 | 0 | 0 |
| Pwp1          | 1  | 0 | 0 | 0 |
| Fbxo7         | 2  | 0 | 0 | 0 |
| Timp3         | 3  | 0 | 0 | 0 |
| 1810014B01Rik | 2  | 0 | 0 | 0 |
| Nt5dc3        | 4  | 0 | 0 | 0 |
| Igf1          | 3  | 0 | 0 | 0 |
| Nup37         | 2  | 0 | 0 | 0 |
| Ccdc53        | 4  | 0 | 0 | 0 |
| XLOC_002486   | 3  | 0 | 0 | 0 |



|             |    |   |   |   |
|-------------|----|---|---|---|
| Gnptab      | 2  | 0 | 0 | 0 |
| Arl1        | 4  | 0 | 0 | 0 |
| Anks1b      | 8  | 0 | 0 | 0 |
| Ikbip       | 4  | 0 | 0 | 0 |
| Cdk17       | 3  | 0 | 0 | 0 |
| Lta4h       | 4  | 0 | 0 | 0 |
| Hal         | 2  | 0 | 0 | 0 |
| Ntn4        | 2  | 0 | 0 | 0 |
| Gm3571      | 1  | 0 | 0 | 0 |
| Fgd6        | 2  | 0 | 0 | 0 |
| Nr2c1       | 2  | 0 | 0 | 0 |
| Ndufa12     | 3  | 0 | 0 | 0 |
| Tmcc3       | 7  | 0 | 0 | 0 |
| Ccdc41      | 2  | 0 | 0 | 0 |
| Ube2n       | 4  | 0 | 0 | 0 |
| Eea1        | 5  | 0 | 0 | 0 |
| Btg1        | 1  | 0 | 0 | 0 |
| Dcn         | 3  | 0 | 0 | 0 |
| Lum         | 1  | 0 | 0 | 0 |
| XLOC_002519 | 10 | 0 | 0 | 0 |
| Atp2b1      | 4  | 0 | 0 | 0 |
| XLOC_002521 | 1  | 0 | 0 | 0 |
| Poc1b       | 2  | 0 | 0 | 0 |
| Wdr51b      | 2  | 0 | 0 | 0 |
| Dusp6       | 2  | 0 | 0 | 0 |
| Kitl        | 2  | 0 | 0 | 0 |
| Cep290      | 4  | 0 | 0 | 0 |
| Rassf9      | 2  | 0 | 0 | 0 |
| Slc6a15     | 5  | 0 | 0 | 0 |
| Ccdc59      | 1  | 0 | 0 | 0 |
| Lin7a       | 6  | 0 | 0 | 0 |
| XLOC_002533 | 3  | 0 | 0 | 0 |
| Ppp1r12a    | 3  | 0 | 0 | 0 |
| Pawr        | 1  | 0 | 0 | 0 |
| E2f7        | 1  | 0 | 0 | 0 |
| Csrp2       | 5  | 0 | 0 | 0 |
| Gm5428      | 1  | 0 | 0 | 0 |
| Osbp18      | 4  | 0 | 0 | 0 |
| Bbs10       | 1  | 0 | 0 | 0 |
| Nap1l1      | 10 | 0 | 0 | 0 |
| Phlda1      | 1  | 0 | 0 | 0 |
| Krr1        | 1  | 0 | 0 | 0 |
| Zfc3h1      | 7  | 0 | 0 | 0 |
| Tspan8      | 3  | 0 | 0 | 0 |
| Ptpr        | 5  | 0 | 0 | 0 |
| AK016591    | 1  | 0 | 0 | 0 |
| AK016788    | 8  | 0 | 0 | 0 |

|               |    |   |   |   |
|---------------|----|---|---|---|
| XLOC_002557   | 1  | 0 | 0 | 0 |
| Cpm           | 3  | 0 | 0 | 0 |
| XLOC_002559   | 5  | 0 | 0 | 0 |
| Mdm1          | 11 | 0 | 0 | 0 |
| Grip1         | 6  | 0 | 0 | 0 |
| Tmbim4        | 1  | 0 | 0 | 0 |
| Llph          | 6  | 0 | 0 | 0 |
| 9230105E05Rik | 1  | 0 | 0 | 0 |
| Gns           | 1  | 0 | 0 | 0 |
| BC048403      | 2  | 0 | 0 | 0 |
| Avpr1a        | 1  | 0 | 0 | 0 |
| Ppm1h         | 6  | 0 | 0 | 0 |
| Fam19a2       | 5  | 0 | 0 | 0 |
| Lrig3         | 4  | 0 | 0 | 0 |
| XLOC_002576   | 3  | 0 | 0 | 0 |
| Ctdsp2        | 5  | 0 | 0 | 0 |
| Avil          | 13 | 0 | 0 | 0 |
| Mettl1        | 1  | 0 | 0 | 0 |
| Cdk4          | 2  | 0 | 0 | 0 |
| Agap2         | 3  | 0 | 0 | 0 |
| B4galnt1      | 7  | 0 | 0 | 0 |
| Dctn2         | 4  | 0 | 0 | 0 |
| R3hdm2        | 10 | 0 | 0 | 0 |
| Stac3         | 11 | 0 | 0 | 0 |
| Ndufa4l2      | 1  | 0 | 0 | 0 |
| AK005897      | 1  | 0 | 0 | 0 |
| Myo1a         | 9  | 0 | 0 | 0 |
| Zbtb39        | 1  | 0 | 0 | 0 |
| Prim1         | 5  | 0 | 0 | 0 |
| Atp5b         | 1  | 0 | 0 | 0 |
| Gls2          | 4  | 0 | 0 | 0 |
| Stat2         | 5  | 0 | 0 | 0 |
| Cs            | 3  | 0 | 0 | 0 |
| Ankrd52       | 4  | 0 | 0 | 0 |
| Rnf41         | 5  | 0 | 0 | 0 |
| Smarcc2       | 6  | 0 | 0 | 0 |
| Wibg          | 2  | 0 | 0 | 0 |
| Pym           | 6  | 0 | 0 | 0 |
| Dnajc14       | 4  | 0 | 0 | 0 |
| Cd63          | 9  | 0 | 0 | 0 |
| Itga7         | 7  | 0 | 0 | 0 |
| Oprm1         | 1  | 0 | 0 | 0 |
| XLOC_002621   | 1  | 0 | 0 | 0 |
| Myct1         | 1  | 0 | 0 | 0 |
| Esr1          | 6  | 0 | 0 | 0 |
| 1700052N19Rik | 2  | 0 | 0 | 0 |
| Akap12        | 8  | 0 | 0 | 0 |

|               |    |   |   |   |
|---------------|----|---|---|---|
| Mthfd1l       | 3  | 0 | 0 | 0 |
| Plekhg1       | 5  | 0 | 0 | 0 |
| lyd           | 2  | 0 | 0 | 0 |
| Ppp1r14c      | 4  | 0 | 0 | 0 |
| Pcmt1         | 8  | 0 | 0 | 0 |
| BC013529      | 3  | 0 | 0 | 0 |
| Tab2          | 3  | 0 | 0 | 0 |
| XLOC_002636   | 1  | 0 | 0 | 0 |
| Ust           | 8  | 0 | 0 | 0 |
| Sash1         | 6  | 0 | 0 | 0 |
| Samd5         | 1  | 0 | 0 | 0 |
| Stxbp5        | 4  | 0 | 0 | 0 |
| 9130014G24Rik | 10 | 0 | 0 | 0 |
| Rab32         | 3  | 0 | 0 | 0 |
| Utrn          | 12 | 0 | 0 | 0 |
| AK045519      | 1  | 0 | 0 | 0 |
| Stx11         | 5  | 0 | 0 | 0 |
| Ltv1          | 3  | 0 | 0 | 0 |
| Phactr2       | 6  | 0 | 0 | 0 |
| Pex3          | 1  | 0 | 0 | 0 |
| Aig1          | 2  | 0 | 0 | 0 |
| Gpr126        | 4  | 0 | 0 | 0 |
| Vta1          | 2  | 0 | 0 | 0 |
| Heca          | 2  | 0 | 0 | 0 |
| 3110003A17Rik | 4  | 0 | 0 | 0 |
| Ccdc28a       | 3  | 0 | 0 | 0 |
| Hebp2         | 2  | 0 | 0 | 0 |
| D10Bwg1379e   | 1  | 0 | 0 | 0 |
| Slc35d3       | 2  | 0 | 0 | 0 |
| Pex7          | 1  | 0 | 0 | 0 |
| Pde7b         | 3  | 0 | 0 | 0 |
| XLOC_002674   | 2  | 0 | 0 | 0 |
| Rps12         | 10 | 0 | 0 | 0 |
| Enpp1         | 2  | 0 | 0 | 0 |
| Enpp3         | 3  | 0 | 0 | 0 |
| Arg1          | 2  | 0 | 0 | 0 |
| XLOC_002680   | 1  | 0 | 0 | 0 |
| Akap7         | 9  | 0 | 0 | 0 |
| Tmem200a      | 3  | 0 | 0 | 0 |
| L3mbtl3       | 9  | 0 | 0 | 0 |
| Lama2         | 11 | 0 | 0 | 0 |
| Rnf146        | 4  | 0 | 0 | 0 |
| Cenpw         | 2  | 0 | 0 | 0 |
| Trmt11        | 4  | 0 | 0 | 0 |
| Hint3         | 1  | 0 | 0 | 0 |
| Ncoa7         | 4  | 0 | 0 | 0 |
| Hey2          | 1  | 0 | 0 | 0 |

|               |       |   |   |   |
|---------------|-------|---|---|---|
| Tpd52l1       | 3     | 0 | 0 | 0 |
| Rnf217        | 1     | 0 | 0 | 0 |
| Clvs2         | 3     | 0 | 0 | 0 |
| Zufsp         | 3     | 0 | 0 | 0 |
| Rwdd1         | 5     | 0 | 0 | 0 |
| Fam26d        | 1     | 0 | 0 | 0 |
| Dse           | 2     | 0 | 0 | 0 |
| AK038624      | 2     | 0 | 0 | 0 |
| Nt5dc1        | 3     | 0 | 0 | 0 |
| Marcks        | 1     | 0 | 0 | 0 |
| 1700025K23Rik | 4     | 0 | 0 | 0 |
| Wisp3         | 3     | 0 | 0 | 0 |
| XLOC_002715   | 2     | 0 | 0 | 0 |
| Gm16365       | 8     | 0 | 0 | 0 |
| E130307A14Rik | 1     | 0 | 0 | 0 |
| AK164126      | 4     | 0 | 0 | 0 |
| Ai317395      | 4     | 0 | 0 | 0 |
| Slc16a10      | 4     | 0 | 0 | 0 |
| Rpf2          | 9     | 0 | 0 | 0 |
| Amd2          | 1     | 0 | 0 | 0 |
| Cdc40         | 2     | 0 | 0 | 0 |
| Fig4          | 2     | 0 | 0 | 0 |
| Armc2         | 9     | 0 | 0 | 0 |
| Foxo3         | 3     | 0 | 0 | 0 |
| Lace1         | 6     | 0 | 0 | 0 |
| Qrs1          | 1     | 0 | 0 | 0 |
| Grik2         | 7     | 0 | 0 | 0 |
| Gopc          | 1     | 0 | 0 | 0 |
| Gm9766        | 2     | 0 | 0 | 0 |
| Mcm9          | 4     | 0 | 0 | 0 |
| Fam184a       | 7     | 0 | 0 | 0 |
| D630037F22Rik | 2     | 0 | 0 | 0 |
| Serinc1       | 6     | 0 | 0 | 0 |
|               | 41892 | 4 | 0 | 0 |
| Ccdc109a      | 4     | 0 | 0 | 0 |
| Ddit4         | 2     | 0 | 0 | 0 |
| Anapc16       | 3     | 0 | 0 | 0 |
| Chst3         | 5     | 0 | 0 | 0 |
| Slc29a3       | 3     | 0 | 0 | 0 |
| Sgpl1         | 4     | 0 | 0 | 0 |
| Adamts14      | 3     | 0 | 0 | 0 |
| X99384        | 6     | 0 | 0 | 0 |
| Eif4ebp2      | 1     | 0 | 0 | 0 |
| H2afy2        | 2     | 0 | 0 | 0 |
| Col13a1       | 9     | 0 | 0 | 0 |
| 2010107G23Rik | 4     | 0 | 0 | 0 |
| Tspan15       | 1     | 0 | 0 | 0 |

|               |    |   |   |   |
|---------------|----|---|---|---|
| Hk1           | 9  | 0 | 0 | 0 |
| Supv3l1       | 6  | 0 | 0 | 0 |
| Vps26a        | 4  | 0 | 0 | 0 |
| Srgn          | 2  | 0 | 0 | 0 |
| 2510003E04Rik | 2  | 0 | 0 | 0 |
| Ddx21         | 3  | 0 | 0 | 0 |
| Ddx50         | 7  | 0 | 0 | 0 |
| Stox1         | 2  | 0 | 0 | 0 |
| Ccar1         | 7  | 0 | 0 | 0 |
| Lrrtm3        | 2  | 0 | 0 | 0 |
| Reep3         | 1  | 0 | 0 | 0 |
| Nrbf2         | 3  | 0 | 0 | 0 |
| Ado           | 1  | 0 | 0 | 0 |
| Zfp365        | 3  | 0 | 0 | 0 |
| Arid5b        | 4  | 0 | 0 | 0 |
| AK044689      | 2  | 0 | 0 | 0 |
| Cdk1          | 1  | 0 | 0 | 0 |
| Phyhipl       | 5  | 0 | 0 | 0 |
| Bicc1         | 4  | 0 | 0 | 0 |
| Tfam          | 1  | 0 | 0 | 0 |
| Ube2d1        | 3  | 0 | 0 | 0 |
| Cisd1         | 4  | 0 | 0 | 0 |
| 1110038D17Rik | 2  | 0 | 0 | 0 |
| A1646023      | 3  | 0 | 0 | 0 |
| Cabin1        | 9  | 0 | 0 | 0 |
| Ddt           | 1  | 0 | 0 | 0 |
| Gstt3         | 1  | 0 | 0 | 0 |
| Gstt1         | 1  | 0 | 0 | 0 |
| Gstt2         | 4  | 0 | 0 | 0 |
| Mif           | 2  | 0 | 0 | 0 |
| Smарcb1       | 4  | 0 | 0 | 0 |
| Mmp11         | 4  | 0 | 0 | 0 |
| Prmt2         | 2  | 0 | 0 | 0 |
| Pcnt          | 7  | 0 | 0 | 0 |
| Col6a2        | 2  | 0 | 0 | 0 |
| Col6a1        | 2  | 0 | 0 | 0 |
| Pcbp3         | 17 | 0 | 0 | 0 |
| Col18a1       | 4  | 0 | 0 | 0 |
| Gm10941       | 2  | 0 | 0 | 0 |
| Adarb1        | 7  | 0 | 0 | 0 |
| 1810008A18Rik | 3  | 0 | 0 | 0 |
| Lrrc3         | 4  | 0 | 0 | 0 |
| Pfkl          | 3  | 0 | 0 | 0 |
| D10Jhu81e     | 4  | 0 | 0 | 0 |
| Pwp2          | 4  | 0 | 0 | 0 |
| Trappc10      | 2  | 0 | 0 | 0 |
| Rrp1          | 8  | 0 | 0 | 0 |

|               |   |   |   |   |
|---------------|---|---|---|---|
| Pdxk          | 1 | 0 | 0 | 0 |
| Syde1         | 3 | 0 | 0 | 0 |
| Ccdc105       | 2 | 0 | 0 | 0 |
| 2610008E11Rik | 2 | 0 | 0 | 0 |
| Ppap2c        | 4 | 0 | 0 | 0 |
| Mier2         | 7 | 0 | 0 | 0 |
| Rnf126        | 2 | 0 | 0 | 0 |
| BC005764      | 2 | 0 | 0 | 0 |
| Med16         | 5 | 0 | 0 | 0 |
| C030046I01Rik | 2 | 0 | 0 | 0 |
| ORF61         | 2 | 0 | 0 | 0 |
| Polr2e        | 1 | 0 | 0 | 0 |
| Sbno2         | 4 | 0 | 0 | 0 |
| Dos           | 6 | 0 | 0 | 0 |
| Gamt          | 1 | 0 | 0 | 0 |
| 2310011J03Rik | 1 | 0 | 0 | 0 |
| Pcsk4         | 6 | 0 | 0 | 0 |
| Mex3d         | 1 | 0 | 0 | 0 |
| Mbd3          | 2 | 0 | 0 | 0 |
| Tcf3          | 7 | 0 | 0 | 0 |
| Atp8b3        | 9 | 0 | 0 | 0 |
| Rexo1         | 4 | 0 | 0 | 0 |
| Fam108a       | 5 | 0 | 0 | 0 |
| Btbd2         | 4 | 0 | 0 | 0 |
| Mknk2         | 4 | 0 | 0 | 0 |
| Ap3d1         | 6 | 0 | 0 | 0 |
| Plekhj1       | 2 | 0 | 0 | 0 |
| Jsrp1         | 4 | 0 | 0 | 0 |
| Lingo3        | 2 | 0 | 0 | 0 |
| Lsm7          | 2 | 0 | 0 | 0 |
| Timm13        | 3 | 0 | 0 | 0 |
| Diras1        | 1 | 0 | 0 | 0 |
| Sgta          | 4 | 0 | 0 | 0 |
| Pias4         | 1 | 0 | 0 | 0 |
| Atcay         | 6 | 0 | 0 | 0 |
| Hmg20b        | 8 | 0 | 0 | 0 |
| Fzr1          | 4 | 0 | 0 | 0 |
| Nfic          | 6 | 0 | 0 | 0 |
| Celf5         | 8 | 0 | 0 | 0 |
| Ncln          | 5 | 0 | 0 | 0 |
| Gna11         | 2 | 0 | 0 | 0 |
| Sirt6         | 3 | 0 | 0 | 0 |
| AK136722      | 2 | 0 | 0 | 0 |
| XLOC_002912   | 5 | 0 | 0 | 0 |
| 1190007I07Rik | 2 | 0 | 0 | 0 |
| Glt8d2        | 2 | 0 | 0 | 0 |
| Nfyb          | 4 | 0 | 0 | 0 |

|               |    |   |   |   |
|---------------|----|---|---|---|
| Slc41a2       | 8  | 0 | 0 | 0 |
| Aldh1l2       | 4  | 0 | 0 | 0 |
| Appl2         | 6  | 0 | 0 | 0 |
| Nuak1         | 7  | 0 | 0 | 0 |
| Ckap4         | 2  | 0 | 0 | 0 |
| Mterfd3       | 3  | 0 | 0 | 0 |
| Cry1          | 3  | 0 | 0 | 0 |
| Prdm4         | 3  | 0 | 0 | 0 |
| D10Wsu52e     | 2  | 0 | 0 | 0 |
| Syn3          | 2  | 0 | 0 | 0 |
| Hsp90b1       | 4  | 0 | 0 | 0 |
| Chpt1         | 5  | 0 | 0 | 0 |
| Utp20         | 6  | 0 | 0 | 0 |
| Ano4          | 9  | 0 | 0 | 0 |
| Gas2l3        | 7  | 0 | 0 | 0 |
| Slc17a8       | 5  | 0 | 0 | 0 |
| Scyl2         | 8  | 0 | 0 | 0 |
| Actr6         | 3  | 0 | 0 | 0 |
| Apaf1         | 8  | 0 | 0 | 0 |
| Slc25a3       | 4  | 0 | 0 | 0 |
| Tmpo          | 8  | 0 | 0 | 0 |
| Rmst          | 3  | 0 | 0 | 0 |
| Nedd1         | 3  | 0 | 0 | 0 |
| BC065048      | 4  | 0 | 0 | 0 |
| XLOC_002952   | 1  | 0 | 0 | 0 |
| Snrpf         | 2  | 0 | 0 | 0 |
| Metap2        | 3  | 0 | 0 | 0 |
| Vezt          | 7  | 0 | 0 | 0 |
| 4932415G12Rik | 6  | 0 | 0 | 0 |
| Plxnc1        | 5  | 0 | 0 | 0 |
| Cradd         | 3  | 0 | 0 | 0 |
| Socs2         | 6  | 0 | 0 | 0 |
| Mrpl42        | 5  | 0 | 0 | 0 |
| Nudt4         | 3  | 0 | 0 | 0 |
| Tmtc3         | 8  | 0 | 0 | 0 |
| 4930430F08Rik | 1  | 0 | 0 | 0 |
| BC067068      | 3  | 0 | 0 | 0 |
| Acss3         | 4  | 0 | 0 | 0 |
| XLOC_002980   | 6  | 0 | 0 | 0 |
| Syt1          | 10 | 0 | 0 | 0 |
| Zdhhc17       | 10 | 0 | 0 | 0 |
| XLOC_002988   | 1  | 0 | 0 | 0 |
| Atxn7l3b      | 1  | 0 | 0 | 0 |
| Trhde         | 2  | 0 | 0 | 0 |
| Tph2          | 4  | 0 | 0 | 0 |
| Tbc1d15       | 1  | 0 | 0 | 0 |
| Rab21         | 2  | 0 | 0 | 0 |

|          |       |   |   |   |
|----------|-------|---|---|---|
| Tmem19   | 5     | 0 | 0 | 0 |
| Lgr5     | 4     | 0 | 0 | 0 |
| Kcnmb4   | 2     | 0 | 0 | 0 |
| Cnot2    | 9     | 0 | 0 | 0 |
| Rab3ip   | 4     | 0 | 0 | 0 |
| Cct2     | 1     | 0 | 0 | 0 |
| Frs2     | 4     | 0 | 0 | 0 |
| Yeats4   | 1     | 0 | 0 | 0 |
| Lyz2     | 2     | 0 | 0 | 0 |
| Mdm2     | 5     | 0 | 0 | 0 |
| Slc35e3  | 3     | 0 | 0 | 0 |
| Nup107   | 2     | 0 | 0 | 0 |
| Rap1b    | 2     | 0 | 0 | 0 |
| Cand1    | 4     | 0 | 0 | 0 |
| AK135691 | 1     | 0 | 0 | 0 |
| Irak3    | 1     | 0 | 0 | 0 |
| Msrb3    | 3     | 0 | 0 | 0 |
| Tbc1d30  | 4     | 0 | 0 | 0 |
| Rassf3   | 3     | 0 | 0 | 0 |
| Tbk1     | 3     | 0 | 0 | 0 |
| Xpot     | 7     | 0 | 0 | 0 |
| Srgap1   | 3     | 0 | 0 | 0 |
| Tmem5    | 2     | 0 | 0 | 0 |
| Usp15    | 2     | 0 | 0 | 0 |
| Slc16a7  | 10    | 0 | 0 | 0 |
| Xrcc6bp1 | 6     | 0 | 0 | 0 |
| Tsfm     | 1     | 0 | 0 | 0 |
|          | 41707 | 0 | 0 | 0 |
| Tspan31  | 3     | 0 | 0 | 0 |
| Slc26a10 | 2     | 0 | 0 | 0 |
| Arhgef25 | 11    | 0 | 0 | 0 |
| Dtx3     | 11    | 0 | 0 | 0 |
| Pip4k2c  | 1     | 0 | 0 | 0 |
| Kif5a    | 11    | 0 | 0 | 0 |
| Shmt2    | 2     | 0 | 0 | 0 |
| Nxph4    | 1     | 0 | 0 | 0 |
| Lrp1     | 9     | 0 | 0 | 0 |
| Nab2     | 4     | 0 | 0 | 0 |
| Rbms2    | 1     | 0 | 0 | 0 |
| Spryd4   | 1     | 0 | 0 | 0 |
| Coq10a   | 2     | 0 | 0 | 0 |
| Obfc2b   | 2     | 0 | 0 | 0 |
| Myl6     | 6     | 0 | 0 | 0 |
| Esyt1    | 4     | 0 | 0 | 0 |
| Zc3h10   | 4     | 0 | 0 | 0 |
| Rpl41    | 6     | 0 | 0 | 0 |
| Pa2g4    | 2     | 0 | 0 | 0 |



|               |    |   |   |   |
|---------------|----|---|---|---|
| Erb3          | 3  | 0 | 0 | 0 |
| Rps26         | 6  | 0 | 0 | 0 |
| Ikzf4         | 2  | 0 | 0 | 0 |
| Suox          | 1  | 0 | 0 | 0 |
| Cdk2          | 7  | 0 | 0 | 0 |
| Dgka          | 9  | 0 | 0 | 0 |
| Ormdl2        | 1  | 0 | 0 | 0 |
| Gdf11         | 1  | 0 | 0 | 0 |
| Rdh5          | 5  | 0 | 0 | 0 |
| Vmn2r87       | 2  | 0 | 0 | 0 |
| Syne1         | 16 | 0 | 0 | 0 |
| XLOC_002212   | 3  | 0 | 0 | 0 |
| XLOC_002219   | 1  | 0 | 0 | 0 |
| Fam54a        | 4  | 0 | 0 | 0 |
| XLOC_002242   | 1  | 0 | 0 | 0 |
| Bet3l         | 1  | 0 | 0 | 0 |
| XLOC_002245   | 2  | 0 | 0 | 0 |
| Tspyl4        | 1  | 0 | 0 | 0 |
| Mical1        | 9  | 0 | 0 | 0 |
| Pkib          | 2  | 0 | 0 | 0 |
| Ggt1          | 3  | 0 | 0 | 0 |
| Derl3         | 1  | 0 | 0 | 0 |
| 1700027D21Rik | 1  | 0 | 0 | 0 |
| Gzmm          | 2  | 0 | 0 | 0 |
| Fgf22         | 2  | 0 | 0 | 0 |
| Kiss1r        | 3  | 0 | 0 | 0 |
| Abca7         | 8  | 0 | 0 | 0 |
| Sf3a2         | 2  | 0 | 0 | 0 |
| Amh           | 2  | 0 | 0 | 0 |
| Matk          | 3  | 0 | 0 | 0 |
| BC025920      | 2  | 0 | 0 | 0 |
| BC064812      | 1  | 0 | 0 | 0 |
| XLOC_002451   | 3  | 0 | 0 | 0 |
| BC030307      | 6  | 0 | 0 | 0 |
| AK048993      | 1  | 0 | 0 | 0 |
| XLOC_002513   | 1  | 0 | 0 | 0 |
| Epyc          | 3  | 0 | 0 | 0 |
| Kitlg         | 4  | 0 | 0 | 0 |
| XLOC_002527   | 1  | 0 | 0 | 0 |
| Gm15663       | 2  | 0 | 0 | 0 |
| Kcnc2         | 3  | 0 | 0 | 0 |
| XLOC_002569   | 1  | 0 | 0 | 0 |
| Arhgap9       | 3  | 0 | 0 | 0 |
| Naca          | 6  | 0 | 0 | 0 |
| XLOC_002597   | 3  | 0 | 0 | 0 |
| XLOC_002609   | 3  | 0 | 0 | 0 |
| AK014660      | 1  | 0 | 0 | 0 |

|               |       |   |   |   |   |
|---------------|-------|---|---|---|---|
| Nkain2        |       | 5 | 0 | 0 | 0 |
| Smpd2         |       | 2 | 0 | 0 | 0 |
| XLOC_002728   |       | 3 | 0 | 0 | 0 |
| Cep5711       |       | 7 | 0 | 0 | 0 |
| AK145144      |       | 4 | 0 | 0 | 0 |
| 1700021F05Rik |       | 1 | 0 | 0 | 0 |
|               | 41892 | 4 | 0 | 0 | 0 |
| Hnrnp3        |       | 1 | 0 | 0 | 0 |
| mKIAA4170     |       | 1 | 0 | 0 | 0 |
| C2cd4c        |       | 1 | 0 | 0 | 0 |
| Shc2          |       | 7 | 0 | 0 | 0 |
| Uqcr11        |       | 2 | 0 | 0 | 0 |
| Slc39a3       |       | 4 | 0 | 0 | 0 |
| Mrpl54        |       | 3 | 0 | 0 | 0 |
| Gipc3         |       | 3 | 0 | 0 | 0 |
| Tle6          |       | 4 | 0 | 0 | 0 |
| Stab2         |       | 1 | 0 | 0 | 0 |
| XLOC_002971   |       | 1 | 0 | 0 | 0 |
| Thap2         |       | 1 | 0 | 0 | 0 |
| Bloc1s1       |       | 1 | 0 | 0 | 0 |
| XLOC_003074   |       | 2 | 0 | 0 | 0 |
| Zbtb2         |       | 3 | 0 | 0 | 0 |
| Lats1         |       | 2 | 0 | 0 | 0 |
| XLOC_002195   |       | 1 | 0 | 0 | 0 |
| Olig3         |       | 1 | 0 | 0 | 0 |
| H60b          |       | 3 | 0 | 0 | 0 |
| Smpd13a       |       | 4 | 0 | 0 | 0 |
| Rufy2         |       | 2 | 0 | 0 | 0 |
| Ctnna3        |       | 3 | 0 | 0 | 0 |
| Gm9923        |       | 1 | 0 | 0 | 0 |
| Cdc34         |       | 2 | 0 | 0 | 0 |
| XLOC_002393   |       | 2 | 0 | 0 | 0 |
| Cfd           |       | 2 | 0 | 0 | 0 |
| Midn          |       | 4 | 0 | 0 | 0 |
| Plk5          |       | 1 | 0 | 0 | 0 |
| Tmprss9       |       | 4 | 0 | 0 | 0 |
| XLOC_002428   |       | 3 | 0 | 0 | 0 |
| Tdg           |       | 6 | 0 | 0 | 0 |
| 1500009L16Rik |       | 4 | 0 | 0 | 0 |
| XLOC_002463   |       | 1 | 0 | 0 | 0 |
| XLOC_002466   |       | 3 | 0 | 0 | 0 |
| XLOC_002495   |       | 2 | 0 | 0 | 0 |
| XLOC_002536   |       | 1 | 0 | 0 | 0 |
| AK020834      |       | 3 | 0 | 0 | 0 |
| Ptprb         |       | 2 | 0 | 0 | 0 |
| Best3         |       | 1 | 0 | 0 | 0 |
| XLOC_002582   |       | 2 | 0 | 0 | 0 |

|               |   |   |   |   |
|---------------|---|---|---|---|
| Timeless      | 4 | 0 | 0 | 0 |
| 1110005A23Rik | 4 | 0 | 0 | 0 |
| 1700052N19Rik | 2 | 0 | 0 | 0 |
| XLOC_002655   | 2 | 0 | 0 | 0 |
| Rspo3         | 1 | 0 | 0 | 0 |
| Fam26f        | 1 | 0 | 0 | 0 |
| XLOC_002742   | 1 | 0 | 0 | 0 |
| XLOC_002759   | 1 | 0 | 0 | 0 |
| XLOC_002765   | 1 | 0 | 0 | 0 |
| 2610008E11Rik | 2 | 0 | 0 | 0 |
| Uqcr          | 1 | 0 | 0 | 0 |
| S1pr4         | 1 | 0 | 0 | 0 |
| Zfp781        | 1 | 0 | 0 | 0 |
| Zfp938        | 1 | 0 | 0 | 0 |
| XLOC_002918   | 2 | 0 | 0 | 0 |
| XLOC_002921   | 1 | 0 | 0 | 0 |
| Fhl4          | 1 | 0 | 0 | 0 |
| XLOC_002949   | 2 | 0 | 0 | 0 |
| 4930485B16Rik | 3 | 0 | 0 | 0 |
| 4932415G12Rik | 6 | 0 | 0 | 0 |
| XLOC_002976   | 1 | 0 | 0 | 0 |
| Ptprq         | 5 | 0 | 0 | 0 |
| Glipr1        | 3 | 0 | 0 | 0 |
| Gpr182        | 1 | 0 | 0 | 0 |
| Myl6b         | 1 | 0 | 0 | 0 |
| XLOC_002269   | 1 | 0 | 0 | 0 |
| XLOC_002299   | 1 | 0 | 0 | 0 |
| Ankrd57       | 1 | 0 | 0 | 0 |
| Pla2g12b      | 1 | 0 | 0 | 0 |
| Pcdh15        | 1 | 0 | 0 | 0 |
| XLOC_002425   | 1 | 0 | 0 | 0 |
| 2210404O07Rik | 4 | 0 | 0 | 0 |
| XLOC_002532   | 1 | 0 | 0 | 0 |
| XLOC_002535   | 1 | 0 | 0 | 0 |
| Gm9182        | 1 | 0 | 0 | 0 |
| Pmel          | 2 | 0 | 0 | 0 |
| XLOC_002652   | 2 | 0 | 0 | 0 |
| 3110003A17Rik | 4 | 0 | 0 | 0 |
| Sobp          | 3 | 0 | 0 | 0 |
| XLOC_002744   | 1 | 0 | 0 | 0 |
| B230314j19    | 1 | 0 | 0 | 0 |
| 2510003E04Rik | 2 | 0 | 0 | 0 |
| Mypn          | 1 | 0 | 0 | 0 |
| Dip2a         | 2 | 0 | 0 | 0 |
| Lmnb2         | 2 | 0 | 0 | 0 |
| B230315N10Rik | 1 | 0 | 0 | 0 |
| 4930547N16Rik | 1 | 0 | 0 | 0 |

|               |   |   |   |   |
|---------------|---|---|---|---|
| XLOC_002999   | 1 | 0 | 0 | 0 |
| Gm239         | 2 | 0 | 0 | 0 |
| XLOC_002183   | 7 | 0 | 0 | 0 |
| AK006045      | 1 | 0 | 0 | 0 |
| Dnmt3l        | 1 | 0 | 0 | 0 |
| Pmch          | 2 | 0 | 0 | 0 |
| Sycp3         | 1 | 0 | 0 | 0 |
| XLOC_002588   | 1 | 0 | 0 | 0 |
| XLOC_002593   | 1 | 0 | 0 | 0 |
| 1110005A23Rik | 4 | 0 | 0 | 0 |
| AK053193      | 1 | 0 | 0 | 0 |
| 2310057J18Rik | 1 | 0 | 0 | 0 |
| Gm16364       | 1 | 0 | 0 | 0 |
| Prdm1         | 2 | 0 | 0 | 0 |
| 2010107G23Rik | 4 | 0 | 0 | 0 |
| Tet1          | 2 | 0 | 0 | 0 |
| XLOC_002796   | 2 | 0 | 0 | 0 |
| 1110038D17Rik | 2 | 0 | 0 | 0 |
| Klf16         | 1 | 0 | 0 | 0 |
| XLOC_002961   | 1 | 0 | 0 | 0 |
| XLOC_003014   | 2 | 0 | 0 | 0 |
| Gm9079        | 1 | 0 | 0 | 0 |
| Nup43         | 1 | 0 | 0 | 0 |
| XLOC_002204   | 1 | 0 | 0 | 0 |
| Raet1e        | 1 | 0 | 0 | 0 |
| 1110021L09Rik | 5 | 0 | 0 | 0 |
| XLOC_002238   | 1 | 0 | 0 | 0 |
| XLOC_002308   | 1 | 0 | 0 | 0 |
| av            | 1 | 0 | 0 | 0 |
| XLOC_002446   | 1 | 0 | 0 | 0 |
| AK144329      | 1 | 0 | 0 | 0 |
| Mmp19         | 1 | 0 | 0 | 0 |
| XLOC_002619   | 1 | 0 | 0 | 0 |
| XLOC_002682   | 1 | 0 | 0 | 0 |
| 1700025K23Rik | 4 | 0 | 0 | 0 |
| AK005653      | 1 | 0 | 0 | 0 |
| Cdh23         | 1 | 0 | 0 | 0 |
| 1810008A18Rik | 3 | 0 | 0 | 0 |
| XLOC_002841   | 2 | 0 | 0 | 0 |
| XLOC_002969   | 1 | 0 | 0 | 0 |
| Mars          | 4 | 0 | 0 | 0 |
| Pisd-ps1      | 8 | 0 | 0 | 0 |
| Eif4enif1     | 5 | 0 | 0 | 0 |
| Selm          | 3 | 0 | 0 | 0 |
| Morc2a        | 5 | 0 | 0 | 0 |
| Dusp18        | 3 | 0 | 0 | 0 |
| Rnf215        | 2 | 0 | 0 | 0 |

|               |   |   |   |   |
|---------------|---|---|---|---|
| Sf3a1         | 2 | 0 | 0 | 0 |
| Tbc1d10a      | 2 | 0 | 0 | 0 |
| Ascc2         | 6 | 0 | 0 | 0 |
| Nipsnap1      | 1 | 0 | 0 | 0 |
| Thoc5         | 4 | 0 | 0 | 0 |
| Rasl10a       | 1 | 0 | 0 | 0 |
| XLOC_003913   | 2 | 0 | 0 | 0 |
| Dbnl          | 7 | 0 | 0 | 0 |
| Aebp1         | 3 | 0 | 0 | 0 |
| Ykt6          | 2 | 0 | 0 | 0 |
| Ogdh          | 9 | 0 | 0 | 0 |
| Zmiz2         | 9 | 0 | 0 | 0 |
| Ccm2          | 2 | 0 | 0 | 0 |
| Ramp3         | 1 | 0 | 0 | 0 |
| Gm11992       | 3 | 0 | 0 | 0 |
| Upp1          | 4 | 0 | 0 | 0 |
| Vwc2          | 5 | 0 | 0 | 0 |
| 4930415F15Rik | 3 | 0 | 0 | 0 |
| AK040873      | 2 | 0 | 0 | 0 |
| Gm12005       | 1 | 0 | 0 | 0 |
| Vstm2a        | 2 | 0 | 0 | 0 |
| Cnrip1        | 2 | 0 | 0 | 0 |
| Ppp3r1        | 3 | 0 | 0 | 0 |
| Wdr92         | 1 | 0 | 0 | 0 |
| C1d           | 1 | 0 | 0 | 0 |
| Glms-ps1      | 1 | 0 | 0 | 0 |
| Spred2        | 5 | 0 | 0 | 0 |
| Rab1          | 1 | 0 | 0 | 0 |
| XLOC_003953   | 3 | 0 | 0 | 0 |
| Sertad2       | 3 | 0 | 0 | 0 |
| Peli1         | 2 | 0 | 0 | 0 |
| Vps54         | 2 | 0 | 0 | 0 |
| Tmem17        | 3 | 0 | 0 | 0 |
| Cct4          | 5 | 0 | 0 | 0 |
| Gm12059       | 3 | 0 | 0 | 0 |
| Xpo1          | 9 | 0 | 0 | 0 |
| Usp34         | 7 | 0 | 0 | 0 |
| Bcl11a        | 5 | 0 | 0 | 0 |
| Fancl         | 5 | 0 | 0 | 0 |
| Gm12079       | 1 | 0 | 0 | 0 |
| Efemp1        | 3 | 0 | 0 | 0 |
| Pnpt1         | 5 | 0 | 0 | 0 |
| Smek2         | 3 | 0 | 0 | 0 |
| Ccdc88a       | 2 | 0 | 0 | 0 |
| Mtif2         | 7 | 0 | 0 | 0 |
| Gm8098        | 4 | 0 | 0 | 0 |
| Psme4         | 3 | 0 | 0 | 0 |

|               |   |   |   |   |
|---------------|---|---|---|---|
| Gpr75         | 2 | 0 | 0 | 0 |
| Cpeb4         | 4 | 0 | 0 | 0 |
| Nsg2          | 2 | 0 | 0 | 0 |
| Snrnp25       | 2 | 0 | 0 | 0 |
| Mpg           | 1 | 0 | 0 | 0 |
| Hba-a2        | 4 | 0 | 0 | 0 |
| Sh3pxd2b      | 5 | 0 | 0 | 0 |
| Ubt2          | 3 | 0 | 0 | 0 |
| Fbxw11        | 6 | 0 | 0 | 0 |
| Kcnmb1        | 2 | 0 | 0 | 0 |
| Pank3         | 2 | 0 | 0 | 0 |
| Nudcd2        | 3 | 0 | 0 | 0 |
| Gm12141       | 1 | 0 | 0 | 0 |
| XLOC_004009   | 2 | 0 | 0 | 0 |
| Slu7          | 3 | 0 | 0 | 0 |
| C1qtnf2       | 2 | 0 | 0 | 0 |
| Ccnjl         | 2 | 0 | 0 | 0 |
| Pwwp2a        | 6 | 0 | 0 | 0 |
| Rnf145        | 6 | 0 | 0 | 0 |
| Ebf1          | 2 | 0 | 0 | 0 |
| Ebf4          | 6 | 0 | 0 | 0 |
| Clint1        | 2 | 0 | 0 | 0 |
| Med7          | 4 | 0 | 0 | 0 |
| Gm12174       | 1 | 0 | 0 | 0 |
| Gnb2l1        | 2 | 0 | 0 | 0 |
| Ifi47         | 1 | 0 | 0 | 0 |
| Zfp62         | 6 | 0 | 0 | 0 |
| Mgat1         | 5 | 0 | 0 | 0 |
| Flt4          | 3 | 0 | 0 | 0 |
| Mapk9         | 8 | 0 | 0 | 0 |
| Rasgef1c      | 3 | 0 | 0 | 0 |
| Rnf130        | 2 | 0 | 0 | 0 |
| Tbc1d9b       | 1 | 0 | 0 | 0 |
| Clk4          | 8 | 0 | 0 | 0 |
| Col23a1       | 4 | 0 | 0 | 0 |
| Agxt2l2       | 4 | 0 | 0 | 0 |
| Nhp2          | 2 | 0 | 0 | 0 |
| D930048N14Rik | 3 | 0 | 0 | 0 |
| Sar1b         | 1 | 0 | 0 | 0 |
| Cdkn2aipnl    | 1 | 0 | 0 | 0 |
| Cdkl3         | 7 | 0 | 0 | 0 |
| Ppp2ca        | 5 | 0 | 0 | 0 |
| Skp1a         | 5 | 0 | 0 | 0 |
| Vdac1         | 7 | 0 | 0 | 0 |
| 9530068E07Rik | 1 | 0 | 0 | 0 |
| Fstl4         | 2 | 0 | 0 | 0 |
| Aff4          | 5 | 0 | 0 | 0 |

|               |    |   |   |   |
|---------------|----|---|---|---|
| Shroom1       | 5  | 0 | 0 | 0 |
| Kif3a         | 5  | 0 | 0 | 0 |
| Ilf5          | 1  | 0 | 0 | 0 |
| Irf1          | 4  | 0 | 0 | 0 |
| P4ha2         | 4  | 0 | 0 | 0 |
| Acsl6         | 2  | 0 | 0 | 0 |
| Hint1         | 1  | 0 | 0 | 0 |
| Gpx3          | 1  | 0 | 0 | 0 |
| Slc36a1       | 5  | 0 | 0 | 0 |
| G3bp1         | 7  | 0 | 0 | 0 |
| Gria1         | 4  | 0 | 0 | 0 |
| Mfap3         | 2  | 0 | 0 | 0 |
| Galnt10       | 2  | 0 | 0 | 0 |
| Sap30l        | 2  | 0 | 0 | 0 |
| Larp1         | 6  | 0 | 0 | 0 |
| Cnot8         | 4  | 0 | 0 | 0 |
| Mrpl22        | 5  | 0 | 0 | 0 |
| Igtp          | 7  | 0 | 0 | 0 |
| Irgm2         | 3  | 0 | 0 | 0 |
| Sh3bp5l       | 4  | 0 | 0 | 0 |
| Gm12258       | 1  | 0 | 0 | 0 |
| 2810021J22Rik | 2  | 0 | 0 | 0 |
| Mprlp         | 9  | 0 | 0 | 0 |
| XLOC_004102   | 3  | 0 | 0 | 0 |
| Med9          | 2  | 0 | 0 | 0 |
| 4933439F18Rik | 1  | 0 | 0 | 0 |
| Drg2          | 4  | 0 | 0 | 0 |
| Myo15         | 11 | 0 | 0 | 0 |
| Alkbh5        | 3  | 0 | 0 | 0 |
| Llgl1         | 6  | 0 | 0 | 0 |
| Smcr7         | 5  | 0 | 0 | 0 |
| Smcr8         | 3  | 0 | 0 | 0 |
| Map2k3        | 3  | 0 | 0 | 0 |
| Kcnj12        | 3  | 0 | 0 | 0 |
| B9d1          | 6  | 0 | 0 | 0 |
| Grap          | 4  | 0 | 0 | 0 |
| Specc1        | 8  | 0 | 0 | 0 |
| Adora2b       | 1  | 0 | 0 | 0 |
| Ttc19         | 2  | 0 | 0 | 0 |
| XLOC_004129   | 3  | 0 | 0 | 0 |
| Ubb           | 3  | 0 | 0 | 0 |
| Trpv2         | 6  | 0 | 0 | 0 |
| Trim16        | 1  | 0 | 0 | 0 |
| Fam18b        | 2  | 0 | 0 | 0 |
| Cdrt4         | 3  | 0 | 0 | 0 |
| Pmp22         | 6  | 0 | 0 | 0 |
| Zkscan6       | 7  | 0 | 0 | 0 |

|               |    |   |   |   |
|---------------|----|---|---|---|
| Pirt          | 6  | 0 | 0 | 0 |
| Tmem220       | 6  | 0 | 0 | 0 |
| Sco1          | 4  | 0 | 0 | 0 |
| Gas7          | 8  | 0 | 0 | 0 |
| Stx8          | 2  | 0 | 0 | 0 |
| Pik3r5        | 6  | 0 | 0 | 0 |
| Pik3r6        | 4  | 0 | 0 | 0 |
| Myh10         | 8  | 0 | 0 | 0 |
| Rpl26         | 5  | 0 | 0 | 0 |
| Slc25a35      | 3  | 0 | 0 | 0 |
| 1500010J02Rik | 10 | 0 | 0 | 0 |
| Tmem107       | 4  | 0 | 0 | 0 |
| Vamp2         | 4  | 0 | 0 | 0 |
| Aloxe3        | 2  | 0 | 0 | 0 |
| Alox12b       | 3  | 0 | 0 | 0 |
| Trappc1       | 1  | 0 | 0 | 0 |
| Kcnab3        | 2  | 0 | 0 | 0 |
| A030009H04Rik | 1  | 0 | 0 | 0 |
| XLOC_004173   | 2  | 0 | 0 | 0 |
| Lsmd1         | 3  | 0 | 0 | 0 |
| Trp53         | 7  | 0 | 0 | 0 |
| Fxr2          | 2  | 0 | 0 | 0 |
| Zbtb4         | 5  | 0 | 0 | 0 |
| Plscr3        | 4  | 0 | 0 | 0 |
| Neurl4        | 5  | 0 | 0 | 0 |
| Gps2          | 7  | 0 | 0 | 0 |
| Ybx2          | 8  | 0 | 0 | 0 |
| Ctdnep1       | 2  | 0 | 0 | 0 |
| Dvl2          | 1  | 0 | 0 | 0 |
| Dlg4          | 8  | 0 | 0 | 0 |
| Gm12312       | 1  | 0 | 0 | 0 |
| Arrb2         | 5  | 0 | 0 | 0 |
| Med11         | 3  | 0 | 0 | 0 |
| Psmb6         | 3  | 0 | 0 | 0 |
| Pld2          | 13 | 0 | 0 | 0 |
| Mink1         | 5  | 0 | 0 | 0 |
| XLOC_004200   | 2  | 0 | 0 | 0 |
| Rnf167        | 1  | 0 | 0 | 0 |
| Kif1c         | 7  | 0 | 0 | 0 |
| Zfp3          | 2  | 0 | 0 | 0 |
| Rabep1        | 5  | 0 | 0 | 0 |
| Rpain         | 2  | 0 | 0 | 0 |
| Mis12         | 2  | 0 | 0 | 0 |
| Wscd1         | 3  | 0 | 0 | 0 |
| Fam64a        | 2  | 0 | 0 | 0 |
| Txndc17       | 3  | 0 | 0 | 0 |
| Xaf1          | 6  | 0 | 0 | 0 |



|               |    |   |   |   |
|---------------|----|---|---|---|
| Mybbp1a       | 4  | 0 | 0 | 0 |
| Ube2g1        | 4  | 0 | 0 | 0 |
| Ankfy1        | 3  | 0 | 0 | 0 |
| Zzef1         | 3  | 0 | 0 | 0 |
| Atp2a3        | 3  | 0 | 0 | 0 |
| Camkk1        | 5  | 0 | 0 | 0 |
| 1200014J11Rik | 2  | 0 | 0 | 0 |
| Itgae         | 4  | 0 | 0 | 0 |
| Shpk          | 5  | 0 | 0 | 0 |
| Trpv1         | 6  | 0 | 0 | 0 |
| XLOC_004224   | 2  | 0 | 0 | 0 |
| Mett10d       | 2  | 0 | 0 | 0 |
| Mnt           | 4  | 0 | 0 | 0 |
| Rtn4rl1       | 4  | 0 | 0 | 0 |
| XLOC_004233   | 3  | 0 | 0 | 0 |
| 2210403K04Rik | 1  | 0 | 0 | 0 |
| Tlcd2         | 1  | 0 | 0 | 0 |
| Prpf8         | 4  | 0 | 0 | 0 |
| Rilp          | 4  | 0 | 0 | 0 |
| Slc43a2       | 3  | 0 | 0 | 0 |
| Pitpna        | 7  | 0 | 0 | 0 |
| Myo1c         | 4  | 0 | 0 | 0 |
| Crk           | 3  | 0 | 0 | 0 |
| Fam57a        | 1  | 0 | 0 | 0 |
| Timm22        | 1  | 0 | 0 | 0 |
| Tusc5         | 5  | 0 | 0 | 0 |
| Gm12345       | 1  | 0 | 0 | 0 |
| Ssh2          | 5  | 0 | 0 | 0 |
| Git1          | 4  | 0 | 0 | 0 |
| Gm12734       | 1  | 0 | 0 | 0 |
| Myo18a        | 9  | 0 | 0 | 0 |
| Sez6          | 5  | 0 | 0 | 0 |
| Phf12         | 4  | 0 | 0 | 0 |
| Flot2         | 11 | 0 | 0 | 0 |
| BC017647      | 2  | 0 | 0 | 0 |
| Tlcd1         | 3  | 0 | 0 | 0 |
| Rab34         | 5  | 0 | 0 | 0 |
| Sdf2          | 1  | 0 | 0 | 0 |
| 2610507B11Rik | 6  | 0 | 0 | 0 |
| Spag5         | 3  | 0 | 0 | 0 |
| Aldoc         | 1  | 0 | 0 | 0 |
| Pigs          | 2  | 0 | 0 | 0 |
| Unc119        | 1  | 0 | 0 | 0 |
| Slc46a1       | 1  | 0 | 0 | 0 |
| Vtn           | 3  | 0 | 0 | 0 |
| Ift20         | 2  | 0 | 0 | 0 |
| XLOC_004280   | 2  | 0 | 0 | 0 |

|               |    |   |   |   |
|---------------|----|---|---|---|
| 1810012P15Rik | 3  | 0 | 0 | 0 |
| Nf1           | 3  | 0 | 0 | 0 |
| Rab11fip4     | 5  | 0 | 0 | 0 |
| Gm11204       | 1  | 0 | 0 | 0 |
| Suz12         | 2  | 0 | 0 | 0 |
| Atad5         | 5  | 0 | 0 | 0 |
| Rnf135        | 3  | 0 | 0 | 0 |
| Rhot1         | 9  | 0 | 0 | 0 |
| Rhbdl3        | 2  | 0 | 0 | 0 |
| Cdk5r1        | 4  | 0 | 0 | 0 |
| Gm11419       | 3  | 0 | 0 | 0 |
| Ccl11         | 2  | 0 | 0 | 0 |
| Tmem132e      | 4  | 0 | 0 | 0 |
| XLOC_004309   | 5  | 0 | 0 | 0 |
| Sfn2          | 1  | 0 | 0 | 0 |
| Ap2b1         | 5  | 0 | 0 | 0 |
| Rasl10b       | 7  | 0 | 0 | 0 |
| Heatr6        | 6  | 0 | 0 | 0 |
| Hnf1b         | 2  | 0 | 0 | 0 |
| Ddx52         | 3  | 0 | 0 | 0 |
| Synrg         | 3  | 0 | 0 | 0 |
| Acaca         | 17 | 0 | 0 | 0 |
| Myo19         | 4  | 0 | 0 | 0 |
| Car4          | 1  | 0 | 0 | 0 |
| Ppm1d         | 3  | 0 | 0 | 0 |
| Bcas3         | 8  | 0 | 0 | 0 |
| Tbx2          | 1  | 0 | 0 | 0 |
| 4632419I22Rik | 1  | 0 | 0 | 0 |
| Rnft1         | 1  | 0 | 0 | 0 |
| Tubd1         | 7  | 0 | 0 | 0 |
| Trim37        | 1  | 0 | 0 | 0 |
| Tex14         | 5  | 0 | 0 | 0 |
| Mtmr4         | 7  | 0 | 0 | 0 |
| Bzap1         | 7  | 0 | 0 | 0 |
| Mks1          | 8  | 0 | 0 | 0 |
| Srsf1         | 1  | 0 | 0 | 0 |
| VeZF1         | 4  | 0 | 0 | 0 |
| Cuedc1        | 3  | 0 | 0 | 0 |
| Mrps23        | 1  | 0 | 0 | 0 |
| AK021127      | 4  | 0 | 0 | 0 |
| Trim25        | 4  | 0 | 0 | 0 |
| A930013B10Rik | 1  | 0 | 0 | 0 |
| Gm525         | 2  | 0 | 0 | 0 |
| Tmem100       | 4  | 0 | 0 | 0 |
| Cox11         | 2  | 0 | 0 | 0 |
| Car10         | 7  | 0 | 0 | 0 |
| B230206L02Rik | 2  | 0 | 0 | 0 |

|               |   |   |   |   |
|---------------|---|---|---|---|
| Tob1          | 3 | 0 | 0 | 0 |
| Ankrd40       | 2 | 0 | 0 | 0 |
| Chad          | 3 | 0 | 0 | 0 |
| Lrrc59        | 1 | 0 | 0 | 0 |
| Mrpl27        | 4 | 0 | 0 | 0 |
| Gm11542       | 1 | 0 | 0 | 0 |
| Col1a1        | 2 | 0 | 0 | 0 |
| Samd14        | 5 | 0 | 0 | 0 |
| Dlx3          | 7 | 0 | 0 | 0 |
| Slc35b1       | 7 | 0 | 0 | 0 |
| XLOC_004395   | 1 | 0 | 0 | 0 |
| Tll6          | 6 | 0 | 0 | 0 |
| Hoxb9         | 4 | 0 | 0 | 0 |
| Hoxb3         | 3 | 0 | 0 | 0 |
| Hoxb6         | 1 | 0 | 0 | 0 |
| Hoxb5         | 4 | 0 | 0 | 0 |
| Hoxb4         | 1 | 0 | 0 | 0 |
| Hoxb2         | 1 | 0 | 0 | 0 |
| Cbx1          | 4 | 0 | 0 | 0 |
| Copz2         | 2 | 0 | 0 | 0 |
| Prr15l        | 3 | 0 | 0 | 0 |
| Sp6           | 2 | 0 | 0 | 0 |
| Scrn2         | 3 | 0 | 0 | 0 |
| Mrpl10        | 4 | 0 | 0 | 0 |
| Osbp17        | 2 | 0 | 0 | 0 |
| Mrpl45        | 1 | 0 | 0 | 0 |
| Socs7         | 4 | 0 | 0 | 0 |
| Arhgap23      | 7 | 0 | 0 | 0 |
| Mllt6         | 7 | 0 | 0 | 0 |
| Cisd3         | 3 | 0 | 0 | 0 |
| Psmb3         | 8 | 0 | 0 | 0 |
| Lasp1         | 7 | 0 | 0 | 0 |
| B230217C12Rik | 2 | 0 | 0 | 0 |
| Cdk12         | 4 | 0 | 0 | 0 |
| Ppp1r1b       | 3 | 0 | 0 | 0 |
| Stard3        | 4 | 0 | 0 | 0 |
| ErbB2         | 3 | 0 | 0 | 0 |
| Psmd3         | 1 | 0 | 0 | 0 |
| Msl1          | 4 | 0 | 0 | 0 |
| Casc3         | 4 | 0 | 0 | 0 |
| Wipf2         | 5 | 0 | 0 | 0 |
| Rara          | 5 | 0 | 0 | 0 |
| Igfbp4        | 3 | 0 | 0 | 0 |
| Gm11560       | 1 | 0 | 0 | 0 |
| Gm11598       | 1 | 0 | 0 | 0 |
| Eif1          | 2 | 0 | 0 | 0 |
| Fkbp10        | 1 | 0 | 0 | 0 |

|               |    |   |   |   |
|---------------|----|---|---|---|
| Ttc25         | 7  | 0 | 0 | 0 |
| Cnp           | 3  | 0 | 0 | 0 |
| Nkiras2       | 2  | 0 | 0 | 0 |
| Atp6v0a1      | 4  | 0 | 0 | 0 |
| Hsd17b1       | 3  | 0 | 0 | 0 |
| Coasy         | 4  | 0 | 0 | 0 |
| Tubg2         | 3  | 0 | 0 | 0 |
| Cntnap1       | 5  | 0 | 0 | 0 |
| Ramp2         | 1  | 0 | 0 | 0 |
| Vps25         | 5  | 0 | 0 | 0 |
| Aoc3          | 5  | 0 | 0 | 0 |
| Rundc1        | 2  | 0 | 0 | 0 |
| Rpl27         | 2  | 0 | 0 | 0 |
| Ifi35         | 3  | 0 | 0 | 0 |
| Nbr1          | 5  | 0 | 0 | 0 |
| Tmem106a      | 4  | 0 | 0 | 0 |
| Arl4d         | 1  | 0 | 0 | 0 |
| Dhx8          | 2  | 0 | 0 | 0 |
| Cd300lg       | 4  | 0 | 0 | 0 |
| Gm11585       | 1  | 0 | 0 | 0 |
| G6pc3         | 3  | 0 | 0 | 0 |
| BC030867      | 4  | 0 | 0 | 0 |
| Rundc3a       | 11 | 0 | 0 | 0 |
| Fzd2          | 1  | 0 | 0 | 0 |
| Gm16342       | 2  | 0 | 0 | 0 |
| Adam11        | 12 | 0 | 0 | 0 |
| Nmt1          | 5  | 0 | 0 | 0 |
| Acbd4         | 7  | 0 | 0 | 0 |
| Hexim1        | 1  | 0 | 0 | 0 |
| Crhr1         | 2  | 0 | 0 | 0 |
| Mapt          | 1  | 0 | 0 | 0 |
| Itgb3         | 2  | 0 | 0 | 0 |
| Mettl2        | 9  | 0 | 0 | 0 |
| AK039104      | 1  | 0 | 0 | 0 |
| Kcnh6         | 3  | 0 | 0 | 0 |
| Dcaf7         | 2  | 0 | 0 | 0 |
| Taco1         | 2  | 0 | 0 | 0 |
| Map3k3        | 5  | 0 | 0 | 0 |
| Ddx42         | 1  | 0 | 0 | 0 |
| Psmc5         | 4  | 0 | 0 | 0 |
| 1810010H24Rik | 4  | 0 | 0 | 0 |
| Psmc12        | 3  | 0 | 0 | 0 |
| Helz          | 9  | 0 | 0 | 0 |
| XLOC_004524   | 1  | 0 | 0 | 0 |
| Axin2         | 4  | 0 | 0 | 0 |
| Gna13         | 2  | 0 | 0 | 0 |
| Amz2          | 5  | 0 | 0 | 0 |

|               |    |   |   |   |
|---------------|----|---|---|---|
| Arsg          | 6  | 0 | 0 | 0 |
| Prkar1a       | 4  | 0 | 0 | 0 |
| Map2k6        | 2  | 0 | 0 | 0 |
| XLOC_004530   | 1  | 0 | 0 | 0 |
| Kcnj2         | 1  | 0 | 0 | 0 |
| Gm11675       | 1  | 0 | 0 | 0 |
| Sstr2         | 2  | 0 | 0 | 0 |
| Cog1          | 5  | 0 | 0 | 0 |
| XLOC_004539   | 1  | 0 | 0 | 0 |
| Ttyh2         | 4  | 0 | 0 | 0 |
| Kif19a        | 6  | 0 | 0 | 0 |
| Gprc5c        | 10 | 0 | 0 | 0 |
| XLOC_004546   | 3  | 0 | 0 | 0 |
| Cd300a        | 6  | 0 | 0 | 0 |
| Rab37         | 2  | 0 | 0 | 0 |
| Tmem104       | 1  | 0 | 0 | 0 |
| Cdr2l         | 3  | 0 | 0 | 0 |
| Ict1          | 2  | 0 | 0 | 0 |
| Kctd2         | 3  | 0 | 0 | 0 |
| Armc7         | 1  | 0 | 0 | 0 |
| Nup85         | 1  | 0 | 0 | 0 |
| 2310067B10Rik | 9  | 0 | 0 | 0 |
| 2310067B10Rik | 9  | 0 | 0 | 0 |
| Tsen54        | 3  | 0 | 0 | 0 |
| Llgl2         | 2  | 0 | 0 | 0 |
| 2210020M01Rik | 3  | 0 | 0 | 0 |
| Sap30bp       | 2  | 0 | 0 | 0 |
| Itgb4         | 7  | 0 | 0 | 0 |
| Unk           | 5  | 0 | 0 | 0 |
| Cdk3          | 4  | 0 | 0 | 0 |
| Sphk1         | 5  | 0 | 0 | 0 |
| Aanat         | 1  | 0 | 0 | 0 |
| 1810032O08Rik | 6  | 0 | 0 | 0 |
| 1110005A03Rik | 2  | 0 | 0 | 0 |
| Mfsd11        | 4  | 0 | 0 | 0 |
| Mgat5b        | 5  | 0 | 0 | 0 |
| 2810008D09Rik | 1  | 0 | 0 | 0 |
| 41891         | 3  | 0 | 0 | 0 |
| Gm11734       | 5  | 0 | 0 | 0 |
| 2900041M22Rik | 1  | 0 | 0 | 0 |
| Tmc8          | 11 | 0 | 0 | 0 |
| Syng2         | 1  | 0 | 0 | 0 |
| Birc5         | 2  | 0 | 0 | 0 |
| Pgs1          | 8  | 0 | 0 | 0 |
| C1qtnf1       | 4  | 0 | 0 | 0 |
| Engase        | 7  | 0 | 0 | 0 |
| Ccdc40        | 3  | 0 | 0 | 0 |

|               |    |   |   |   |
|---------------|----|---|---|---|
| Slc26a11      | 4  | 0 | 0 | 0 |
| XLOC_004601   | 2  | 0 | 0 | 0 |
| Rnf213        | 9  | 0 | 0 | 0 |
| A730011L01Rik | 4  | 0 | 0 | 0 |
| Gm11762       | 3  | 0 | 0 | 0 |
| Rptor         | 4  | 0 | 0 | 0 |
| Chmp6         | 1  | 0 | 0 | 0 |
| Baiap2        | 3  | 0 | 0 | 0 |
| 1810043H04Rik | 1  | 0 | 0 | 0 |
| Bahcc1        | 7  | 0 | 0 | 0 |
| Hgs           | 6  | 0 | 0 | 0 |
| Mrpl12        | 3  | 0 | 0 | 0 |
| Anapc11       | 5  | 0 | 0 | 0 |
| Lrrc45        | 5  | 0 | 0 | 0 |
| Rac3          | 1  | 0 | 0 | 0 |
| Hexdc         | 4  | 0 | 0 | 0 |
| Narf          | 1  | 0 | 0 | 0 |
| Foxk2         | 6  | 0 | 0 | 0 |
| Fn3krp        | 1  | 0 | 0 | 0 |
| Tbcd          | 9  | 0 | 0 | 0 |
| Drg1          | 4  | 0 | 0 | 0 |
| Limk2         | 5  | 0 | 0 | 0 |
| Rnf185        | 4  | 0 | 0 | 0 |
| Smtn          | 4  | 0 | 0 | 0 |
| Tug1          | 1  | 0 | 0 | 0 |
| Osbp2         | 6  | 0 | 0 | 0 |
| Slc35e4       | 2  | 0 | 0 | 0 |
| Mtfp1         | 3  | 0 | 0 | 0 |
| Ccdc157       | 6  | 0 | 0 | 0 |
| Hormad2       | 1  | 0 | 0 | 0 |
| Mtmr3         | 11 | 0 | 0 | 0 |
| Uqcr10        | 4  | 0 | 0 | 0 |
| Cabp7         | 1  | 0 | 0 | 0 |
| Nf2           | 8  | 0 | 0 | 0 |
| Nefh          | 9  | 0 | 0 | 0 |
| Gas2l1        | 7  | 0 | 0 | 0 |
| Ewsr1         | 8  | 0 | 0 | 0 |
| Emid1         | 4  | 0 | 0 | 0 |
| Ccdc117       | 2  | 0 | 0 | 0 |
| Mrps24        | 1  | 0 | 0 | 0 |
| Pold2         | 1  | 0 | 0 | 0 |
| Gck           | 1  | 0 | 0 | 0 |
| Camk2b        | 11 | 0 | 0 | 0 |
| Nudcd3        | 4  | 0 | 0 | 0 |
| Ddx56         | 2  | 0 | 0 | 0 |
| Tmed4         | 1  | 0 | 0 | 0 |
| H2afv         | 2  | 0 | 0 | 0 |

|               |    |   |   |   |
|---------------|----|---|---|---|
| Myo1g         | 5  | 0 | 0 | 0 |
| AK160548      | 2  | 0 | 0 | 0 |
| Nacad         | 6  | 0 | 0 | 0 |
| Tbrg4         | 5  | 0 | 0 | 0 |
| Gm11977       | 1  | 0 | 0 | 0 |
| Igfbp3        | 1  | 0 | 0 | 0 |
| Tns3          | 8  | 0 | 0 | 0 |
| Hus1          | 7  | 0 | 0 | 0 |
| Zpbp          | 7  | 0 | 0 | 0 |
| Figl1         | 3  | 0 | 0 | 0 |
| Grb10         | 8  | 0 | 0 | 0 |
| Cobl          | 9  | 0 | 0 | 0 |
| Gm12663       | 1  | 0 | 0 | 0 |
| Pno1          | 1  | 0 | 0 | 0 |
| Etaa1         | 2  | 0 | 0 | 0 |
| Meis1         | 4  | 0 | 0 | 0 |
| XLOC_004705   | 2  | 0 | 0 | 0 |
| Actr2         | 5  | 0 | 0 | 0 |
| Slc1a4        | 3  | 0 | 0 | 0 |
| Aftph         | 4  | 0 | 0 | 0 |
| 1110067D22Rik | 5  | 0 | 0 | 0 |
| Ugp2          | 3  | 0 | 0 | 0 |
| Mdh1          | 5  | 0 | 0 | 0 |
| Ehbp1         | 14 | 0 | 0 | 0 |
| XLOC_004718   | 4  | 0 | 0 | 0 |
| B3gnt2        | 3  | 0 | 0 | 0 |
| mKIAA1841     | 2  | 0 | 0 | 0 |
| 0610010F05Rik | 1  | 0 | 0 | 0 |
| Pex13         | 3  | 0 | 0 | 0 |
| Rel           | 2  | 0 | 0 | 0 |
| Vrk2          | 1  | 0 | 0 | 0 |
| Ccdc85a       | 5  | 0 | 0 | 0 |
| Ccdc104       | 1  | 0 | 0 | 0 |
| Prorsd1       | 3  | 0 | 0 | 0 |
| Eml6          | 8  | 0 | 0 | 0 |
| Spnb2         | 5  | 0 | 0 | 0 |
| Erlec1        | 4  | 0 | 0 | 0 |
| Chac2         | 2  | 0 | 0 | 0 |
| Bod1          | 1  | 0 | 0 | 0 |
| XLOC_004745   | 3  | 0 | 0 | 0 |
| Rhbdf1        | 5  | 0 | 0 | 0 |
| Nprl3         | 4  | 0 | 0 | 0 |
| Efcab9        | 3  | 0 | 0 | 0 |
| XLOC_004748   | 1  | 0 | 0 | 0 |
| Fgf18         | 5  | 0 | 0 | 0 |
| Tlx3          | 5  | 0 | 0 | 0 |
| Ranbp17       | 1  | 0 | 0 | 0 |

|               |    |   |   |   |
|---------------|----|---|---|---|
| AK015529      | 2  | 0 | 0 | 0 |
| Dock2         | 10 | 0 | 0 | 0 |
| Ccdc99        | 4  | 0 | 0 | 0 |
| Fbll1         | 1  | 0 | 0 | 0 |
| Rars          | 2  | 0 | 0 | 0 |
| Mat2b         | 3  | 0 | 0 | 0 |
| Ccng1         | 2  | 0 | 0 | 0 |
| Gabrg2        | 10 | 0 | 0 | 0 |
| Gabra1        | 4  | 0 | 0 | 0 |
| Pttg1         | 2  | 0 | 0 | 0 |
| Ttc1          | 2  | 0 | 0 | 0 |
| Adra1b        | 1  | 0 | 0 | 0 |
| Ublcp1        | 9  | 0 | 0 | 0 |
| Gm12161       | 1  | 0 | 0 | 0 |
| Lsm11         | 4  | 0 | 0 | 0 |
| Thg1l         | 1  | 0 | 0 | 0 |
| Cyfp2         | 6  | 0 | 0 | 0 |
| Itk           | 2  | 0 | 0 | 0 |
| Sgcd          | 10 | 0 | 0 | 0 |
| Gm12183       | 1  | 0 | 0 | 0 |
| XLOC_004791   | 1  | 0 | 0 | 0 |
| Irgm1         | 3  | 0 | 0 | 0 |
| Tgtp2         | 3  | 0 | 0 | 0 |
| Cnot6         | 3  | 0 | 0 | 0 |
| Sqstm1        | 8  | 0 | 0 | 0 |
| Ltc4s         | 2  | 0 | 0 | 0 |
| Canx          | 1  | 0 | 0 | 0 |
| Rufy1         | 3  | 0 | 0 | 0 |
| Zfp354c       | 4  | 0 | 0 | 0 |
| Zfp354b       | 5  | 0 | 0 | 0 |
| Rmnd5b        | 2  | 0 | 0 | 0 |
| N4bp3         | 2  | 0 | 0 | 0 |
| 0610009B22Rik | 2  | 0 | 0 | 0 |
| Ube2b         | 9  | 0 | 0 | 0 |
| Olfr1383      | 1  | 0 | 0 | 0 |
| Tcf7          | 7  | 0 | 0 | 0 |
| Hspa4         | 5  | 0 | 0 | 0 |
| Uqcrq         | 2  | 0 | 0 | 0 |
| AK038603      | 1  | 0 | 0 | 0 |
| Rad50         | 4  | 0 | 0 | 0 |
| Slc22a5       | 7  | 0 | 0 | 0 |
| Pdlim4        | 1  | 0 | 0 | 0 |
| Cdc42se2      | 6  | 0 | 0 | 0 |
| Lym7          | 3  | 0 | 0 | 0 |
| Anxa6         | 6  | 0 | 0 | 0 |
| Gm12231       | 1  | 0 | 0 | 0 |
| Slc36a2       | 3  | 0 | 0 | 0 |



|               |    |   |   |   |
|---------------|----|---|---|---|
| Sparc         | 6  | 0 | 0 | 0 |
| Atox1         | 4  | 0 | 0 | 0 |
| XLOC_004846   | 1  | 0 | 0 | 0 |
| Fam114a2      | 5  | 0 | 0 | 0 |
| AK007998      | 5  | 0 | 0 | 0 |
| Gemin5        | 8  | 0 | 0 | 0 |
| XLOC_004853   | 2  | 0 | 0 | 0 |
| Gm12251       | 1  | 0 | 0 | 0 |
| Gm12254       | 1  | 0 | 0 | 0 |
| 2210407C18Rik | 1  | 0 | 0 | 0 |
| Fam183b       | 1  | 0 | 0 | 0 |
| Obscn         | 2  | 0 | 0 | 0 |
| A230051G13Rik | 1  | 0 | 0 | 0 |
| Arf1          | 4  | 0 | 0 | 0 |
| Snap47        | 6  | 0 | 0 | 0 |
| Zkscan17      | 4  | 0 | 0 | 0 |
| Pld6          | 2  | 0 | 0 | 0 |
| Flcn          | 1  | 0 | 0 | 0 |
| Cops3         | 4  | 0 | 0 | 0 |
| AK005951      | 2  | 0 | 0 | 0 |
| Pemt          | 4  | 0 | 0 | 0 |
| Srebf1        | 3  | 0 | 0 | 0 |
| Tom1l2        | 4  | 0 | 0 | 0 |
| Atpaf2        | 1  | 0 | 0 | 0 |
| Top3a         | 3  | 0 | 0 | 0 |
| Shmt1         | 1  | 0 | 0 | 0 |
| Tmem11        | 2  | 0 | 0 | 0 |
| Gm16516       | 2  | 0 | 0 | 0 |
| Usp22         | 6  | 0 | 0 | 0 |
| Aldh3a2       | 3  | 0 | 0 | 0 |
| Slc47a2       | 5  | 0 | 0 | 0 |
| Rnf112        | 12 | 0 | 0 | 0 |
| Mapk7         | 5  | 0 | 0 | 0 |
| Epn2          | 8  | 0 | 0 | 0 |
| Prpsap2       | 11 | 0 | 0 | 0 |
| Ulk2          | 2  | 0 | 0 | 0 |
| Akap10        | 2  | 0 | 0 | 0 |
| Ncor1         | 9  | 0 | 0 | 0 |
| BC046404      | 1  | 0 | 0 | 0 |
| Zfp287        | 4  | 0 | 0 | 0 |
| Zfp286        | 5  | 0 | 0 | 0 |
| AK043365      | 1  | 0 | 0 | 0 |
| XLOC_004917   | 1  | 0 | 0 | 0 |
| Hs3st3b1      | 1  | 0 | 0 | 0 |
| Arhgap44      | 8  | 0 | 0 | 0 |
| Map2k4        | 6  | 0 | 0 | 0 |
| Shisa6        | 2  | 0 | 0 | 0 |

|               |    |   |   |   |
|---------------|----|---|---|---|
| 2310004I24Rik | 5  | 0 | 0 | 0 |
| Ndel1         | 4  | 0 | 0 | 0 |
| Arhgef15      | 5  | 0 | 0 | 0 |
| Pfas          | 6  | 0 | 0 | 0 |
| Cntrob        | 3  | 0 | 0 | 0 |
| Chd3          | 9  | 0 | 0 | 0 |
| Tmem88        | 1  | 0 | 0 | 0 |
| Kdm6b         | 7  | 0 | 0 | 0 |
| Dnahc2        | 13 | 0 | 0 | 0 |
| Wrap53        | 2  | 0 | 0 | 0 |
| Atp1b2        | 2  | 0 | 0 | 0 |
| Supl15h       | 1  | 0 | 0 | 0 |
| Mpdu1         | 2  | 0 | 0 | 0 |
| Eif4a1        | 7  | 0 | 0 | 0 |
| Senp3         | 1  | 0 | 0 | 0 |
| Polr2a        | 3  | 0 | 0 | 0 |
| Nlgn2         | 5  | 0 | 0 | 0 |
| Kctd11        | 1  | 0 | 0 | 0 |
| Acap1         | 6  | 0 | 0 | 0 |
| 2810408A11Rik | 6  | 0 | 0 | 0 |
| Eif5a         | 4  | 0 | 0 | 0 |
| Rai12         | 2  | 0 | 0 | 0 |
| Acadvl        | 3  | 0 | 0 | 0 |
| Bcl6b         | 2  | 0 | 0 | 0 |
| Alox12        | 4  | 0 | 0 | 0 |
| Pelp1         | 2  | 0 | 0 | 0 |
| Vmo1          | 3  | 0 | 0 | 0 |
| Slc25a11      | 3  | 0 | 0 | 0 |
| Camta2        | 5  | 0 | 0 | 0 |
| Nup88         | 3  | 0 | 0 | 0 |
| C1qbp         | 3  | 0 | 0 | 0 |
| Dhx33         | 7  | 0 | 0 | 0 |
| Derl2         | 3  | 0 | 0 | 0 |
| 6330403K07Rik | 2  | 0 | 0 | 0 |
| Pitpm3        | 10 | 0 | 0 | 0 |
| 4933427D14Rik | 1  | 0 | 0 | 0 |
| Med31         | 2  | 0 | 0 | 0 |
| Smtnl2        | 3  | 0 | 0 | 0 |
| Spns2         | 4  | 0 | 0 | 0 |
| Ctns          | 3  | 0 | 0 | 0 |
| Aspa          | 1  | 0 | 0 | 0 |
| mKIAA1039     | 7  | 0 | 0 | 0 |
| Rap1gap2      | 1  | 0 | 0 | 0 |
| Pafah1b1      | 8  | 0 | 0 | 0 |
| Srr           | 4  | 0 | 0 | 0 |
| Ovca2         | 1  | 0 | 0 | 0 |
| Dph1          | 2  | 0 | 0 | 0 |

|               |    |   |   |   |
|---------------|----|---|---|---|
| Rpa1          | 5  | 0 | 0 | 0 |
| Serpinf1      | 1  | 0 | 0 | 0 |
| Wdr81         | 3  | 0 | 0 | 0 |
| Fam101b       | 2  | 0 | 0 | 0 |
| Vps53         | 4  | 0 | 0 | 0 |
| Gemin4        | 2  | 0 | 0 | 0 |
| Glod4         | 1  | 0 | 0 | 0 |
| Nxn           | 4  | 0 | 0 | 0 |
| Abr           | 11 | 0 | 0 | 0 |
| Gosr1         | 3  | 0 | 0 | 0 |
| Cpd           | 2  | 0 | 0 | 0 |
| Ccdc55        | 1  | 0 | 0 | 0 |
| Efcab5        | 8  | 0 | 0 | 0 |
| Ankrd13b      | 5  | 0 | 0 | 0 |
| Taok1         | 8  | 0 | 0 | 0 |
| Pipox         | 9  | 0 | 0 | 0 |
| AK053376      | 1  | 0 | 0 | 0 |
| Eral1         | 1  | 0 | 0 | 0 |
| Traf4         | 2  | 0 | 0 | 0 |
| Nek8          | 4  | 0 | 0 | 0 |
| Rpl23a        | 2  | 0 | 0 | 0 |
| Supt6h        | 5  | 0 | 0 | 0 |
| Sarm1         | 4  | 0 | 0 | 0 |
| Tmem199       | 1  | 0 | 0 | 0 |
| Tnfaip1       | 3  | 0 | 0 | 0 |
| Tmem97        | 2  | 0 | 0 | 0 |
| Nlk           | 3  | 0 | 0 | 0 |
| Lgals9        | 4  | 0 | 0 | 0 |
| Wsb1          | 5  | 0 | 0 | 0 |
| Utp6          | 3  | 0 | 0 | 0 |
| Crif3         | 2  | 0 | 0 | 0 |
| 1110002N22Rik | 2  | 0 | 0 | 0 |
| 5730455P16Rik | 3  | 0 | 0 | 0 |
| Myo1d         | 6  | 0 | 0 | 0 |
| Accn1         | 9  | 0 | 0 | 0 |
| Ccl1          | 1  | 0 | 0 | 0 |
| Gm11423       | 3  | 0 | 0 | 0 |
| Rffl          | 3  | 0 | 0 | 0 |
| Rad51l3       | 1  | 0 | 0 | 0 |
| Nle1          | 5  | 0 | 0 | 0 |
| Mmp28         | 7  | 0 | 0 | 0 |
| Ccl5          | 1  | 0 | 0 | 0 |
| Ccl6          | 1  | 0 | 0 | 0 |
| Dusp14        | 3  | 0 | 0 | 0 |
| Tada2a        | 6  | 0 | 0 | 0 |
| Aatf          | 2  | 0 | 0 | 0 |
| Mrm1          | 4  | 0 | 0 | 0 |

|               |    |   |   |   |
|---------------|----|---|---|---|
| Dhrs11        | 6  | 0 | 0 | 0 |
| Ggnbp2        | 9  | 0 | 0 | 0 |
| Znhit3        | 2  | 0 | 0 | 0 |
| Usp32         | 7  | 0 | 0 | 0 |
| Appbp2        | 5  | 0 | 0 | 0 |
| XLOC_005083   | 4  | 0 | 0 | 0 |
| AK135737      | 2  | 0 | 0 | 0 |
| Med13         | 3  | 0 | 0 | 0 |
| Rps6kb1       | 3  | 0 | 0 | 0 |
| Cltc          | 4  | 0 | 0 | 0 |
| Dhx40         | 1  | 0 | 0 | 0 |
| Ypel2         | 2  | 0 | 0 | 0 |
| Gdpd1         | 2  | 0 | 0 | 0 |
| 1200011M11Rik | 3  | 0 | 0 | 0 |
| Ppm1e         | 3  | 0 | 0 | 0 |
| Rad51c        | 2  | 0 | 0 | 0 |
| Dynll2        | 1  | 0 | 0 | 0 |
| Msi2          | 5  | 0 | 0 | 0 |
| Akap1         | 2  | 0 | 0 | 0 |
| Scpep1        | 3  | 0 | 0 | 0 |
| Dgke          | 2  | 0 | 0 | 0 |
| Pctp          | 2  | 0 | 0 | 0 |
| Hlf           | 4  | 0 | 0 | 0 |
| Stxbp4        | 1  | 0 | 0 | 0 |
| Tom1l1        | 1  | 0 | 0 | 0 |
| Utp18         | 3  | 0 | 0 | 0 |
| Wfikkn2       | 1  | 0 | 0 | 0 |
| Luc7l3        | 8  | 0 | 0 | 0 |
| Abcc3         | 7  | 0 | 0 | 0 |
| Epn3          | 6  | 0 | 0 | 0 |
| Rsad1         | 10 | 0 | 0 | 0 |
| Acsf2         | 6  | 0 | 0 | 0 |
| Eme1          | 2  | 0 | 0 | 0 |
| Xylt2         | 5  | 0 | 0 | 0 |
| Pdk2          | 4  | 0 | 0 | 0 |
| Myst2         | 10 | 0 | 0 | 0 |
| Ngfr          | 5  | 0 | 0 | 0 |
| Abi3          | 3  | 0 | 0 | 0 |
| Ube2z         | 3  | 0 | 0 | 0 |
| Atp5g1        | 2  | 0 | 0 | 0 |
| AK002860      | 1  | 0 | 0 | 0 |
| Snx11         | 8  | 0 | 0 | 0 |
| Nfe2l1        | 9  | 0 | 0 | 0 |
| Pnp0          | 1  | 0 | 0 | 0 |
| Sp2           | 3  | 0 | 0 | 0 |
| Tbkbp1        | 9  | 0 | 0 | 0 |
| Kpnb1         | 3  | 0 | 0 | 0 |

|               |    |   |   |   |
|---------------|----|---|---|---|
| Npepps        | 5  | 0 | 0 | 0 |
| Gpr179        | 4  | 0 | 0 | 0 |
| Srcin1        | 16 | 0 | 0 | 0 |
| E130012A19Rik | 1  | 0 | 0 | 0 |
| AK155239      | 4  | 0 | 0 | 0 |
| Pcgf2         | 7  | 0 | 0 | 0 |
| Cwc25         | 1  | 0 | 0 | 0 |
| Rpl23         | 11 | 0 | 0 | 0 |
| Cacnb1        | 2  | 0 | 0 | 0 |
| Stac2         | 4  | 0 | 0 | 0 |
| Fbxl20        | 4  | 0 | 0 | 0 |
| Med1          | 9  | 0 | 0 | 0 |
| Pgap3         | 3  | 0 | 0 | 0 |
| 1810046J19Rik | 3  | 0 | 0 | 0 |
| Ikzf3         | 3  | 0 | 0 | 0 |
| Ormdl3        | 2  | 0 | 0 | 0 |
| Med24         | 7  | 0 | 0 | 0 |
| Nr1d1         | 2  | 0 | 0 | 0 |
| Top2a         | 4  | 0 | 0 | 0 |
| Smarce1       | 5  | 0 | 0 | 0 |
| Krt222        | 2  | 0 | 0 | 0 |
| Krt26         | 1  | 0 | 0 | 0 |
| Krt27         | 3  | 0 | 0 | 0 |
| Krt10         | 3  | 0 | 0 | 0 |
| Krt9          | 2  | 0 | 0 | 0 |
| Hap1          | 6  | 0 | 0 | 0 |
| Jup           | 4  | 0 | 0 | 0 |
| Leprel4       | 3  | 0 | 0 | 0 |
| Nt5c3l        | 3  | 0 | 0 | 0 |
| Klhl11        | 2  | 0 | 0 | 0 |
| Acly          | 8  | 0 | 0 | 0 |
| Dnajc7        | 8  | 0 | 0 | 0 |
| Kat2a         | 4  | 0 | 0 | 0 |
| Rab5c         | 2  | 0 | 0 | 0 |
| Ghdc          | 3  | 0 | 0 | 0 |
| Stat5b        | 6  | 0 | 0 | 0 |
| Stat3         | 7  | 0 | 0 | 0 |
| Ptrf          | 2  | 0 | 0 | 0 |
| Psmc3ip       | 4  | 0 | 0 | 0 |
| Fam134c       | 3  | 0 | 0 | 0 |
| Ezh1          | 3  | 0 | 0 | 0 |
| Ccdc56        | 2  | 0 | 0 | 0 |
| Becn1         | 1  | 0 | 0 | 0 |
| Aarsd1        | 3  | 0 | 0 | 0 |
| 1700113I22Rik | 4  | 0 | 0 | 0 |
| Vat1          | 3  | 0 | 0 | 0 |
| Etv4          | 7  | 0 | 0 | 0 |

|               |    |   |   |   |
|---------------|----|---|---|---|
| Dusp3         | 3  | 0 | 0 | 0 |
| Mpp3          | 2  | 0 | 0 | 0 |
| Mpp2          | 4  | 0 | 0 | 0 |
| Tmem101       | 2  | 0 | 0 | 0 |
| Lsm12         | 3  | 0 | 0 | 0 |
| Hdac5         | 5  | 0 | 0 | 0 |
| Atxn7l3       | 7  | 0 | 0 | 0 |
| Ubtf          | 11 | 0 | 0 | 0 |
| Slc25a39      | 2  | 0 | 0 | 0 |
| Fam171a2      | 3  | 0 | 0 | 0 |
| Gpatch8       | 7  | 0 | 0 | 0 |
| Ccdc43        | 3  | 0 | 0 | 0 |
| Gjc1          | 6  | 0 | 0 | 0 |
| Eftud2        | 5  | 0 | 0 | 0 |
| 1700023F06Rik | 4  | 0 | 0 | 0 |
| Arhgap27      | 5  | 0 | 0 | 0 |
| Plekhm1       | 2  | 0 | 0 | 0 |
| Gosr2         | 6  | 0 | 0 | 0 |
| Nsf           | 5  | 0 | 0 | 0 |
| 1700081L11Rik | 10 | 0 | 0 | 0 |
| Cdc27         | 3  | 0 | 0 | 0 |
| Cyb561        | 5  | 0 | 0 | 0 |
| Limd2         | 1  | 0 | 0 | 0 |
| Strada        | 3  | 0 | 0 | 0 |
| Ccdc47        | 1  | 0 | 0 | 0 |
| Cd79b         | 1  | 0 | 0 | 0 |
| Scn4a         | 5  | 0 | 0 | 0 |
| Icam2         | 3  | 0 | 0 | 0 |
| Ern1          | 4  | 0 | 0 | 0 |
| Tex2          | 4  | 0 | 0 | 0 |
| Pecam1        | 6  | 0 | 0 | 0 |
| Polg2         | 2  | 0 | 0 | 0 |
| Ddx5          | 8  | 0 | 0 | 0 |
| Smurf2        | 5  | 0 | 0 | 0 |
| Nol11         | 1  | 0 | 0 | 0 |
| Pitpnc1       | 7  | 0 | 0 | 0 |
| Cacng4        | 2  | 0 | 0 | 0 |
| Cacng5        | 1  | 0 | 0 | 0 |
| Prkca         | 5  | 0 | 0 | 0 |
| Rgs9          | 1  | 0 | 0 | 0 |
| Wipi1         | 2  | 0 | 0 | 0 |
| Fam20a        | 4  | 0 | 0 | 0 |
| Abca8a        | 2  | 0 | 0 | 0 |
| Abca6         | 1  | 0 | 0 | 0 |
| Abca5         | 3  | 0 | 0 | 0 |
| XLOC_005302   | 2  | 0 | 0 | 0 |
| 2610035D17Rik | 5  | 0 | 0 | 0 |

|               |    |   |   |   |
|---------------|----|---|---|---|
| D11Wsu99e     | 2  | 0 | 0 | 0 |
| Cdc42ep4      | 5  | 0 | 0 | 0 |
| Sdk2          | 6  | 0 | 0 | 0 |
| AF251705      | 5  | 0 | 0 | 0 |
| MAIR-IIa      | 1  | 0 | 0 | 0 |
| Nat9          | 4  | 0 | 0 | 0 |
| Fdxr          | 7  | 0 | 0 | 0 |
| Fads6         | 2  | 0 | 0 | 0 |
| Ush1g         | 1  | 0 | 0 | 0 |
| C630004H02Rik | 5  | 0 | 0 | 0 |
| Nt5c          | 1  | 0 | 0 | 0 |
| Hn1           | 2  | 0 | 0 | 0 |
| Gga3          | 10 | 0 | 0 | 0 |
| Slc25a19      | 1  | 0 | 0 | 0 |
| Caskin2       | 4  | 0 | 0 | 0 |
| Galk1         | 1  | 0 | 0 | 0 |
| H3f3b         | 3  | 0 | 0 | 0 |
| Unc13d        | 8  | 0 | 0 | 0 |
| Wbp2          | 8  | 0 | 0 | 0 |
| Mrpl38        | 2  | 0 | 0 | 0 |
| Fbf1          | 10 | 0 | 0 | 0 |
| Acox1         | 5  | 0 | 0 | 0 |
| Srp68         | 4  | 0 | 0 | 0 |
| Exoc7         | 7  | 0 | 0 | 0 |
| Rnf157        | 6  | 0 | 0 | 0 |
| Prpsap1       | 6  | 0 | 0 | 0 |
| Ube2o         | 4  | 0 | 0 | 0 |
| Cygb          | 4  | 0 | 0 | 0 |
| Mxra7         | 1  | 0 | 0 | 0 |
| Srsf2         | 1  | 0 | 0 | 0 |
| AK086245      | 1  | 0 | 0 | 0 |
| Tmc6          | 4  | 0 | 0 | 0 |
| Tk1           | 1  | 0 | 0 | 0 |
| Socs3         | 3  | 0 | 0 | 0 |
| XLOC_005363   | 7  | 0 | 0 | 0 |
| Cyth1         | 6  | 0 | 0 | 0 |
| Usp36         | 8  | 0 | 0 | 0 |
| Timp2         | 6  | 0 | 0 | 0 |
| Lgals3bp      | 2  | 0 | 0 | 0 |
| Cant1         | 6  | 0 | 0 | 0 |
| Rbfox3        | 10 | 0 | 0 | 0 |
| Cbx8          | 1  | 0 | 0 | 0 |
| Tbc1d16       | 7  | 0 | 0 | 0 |
| Eif4a3        | 3  | 0 | 0 | 0 |
| Sgsh          | 1  | 0 | 0 | 0 |
| Nptx1         | 2  | 0 | 0 | 0 |
| XLOC_005382   | 2  | 0 | 0 | 0 |

|               |    |   |   |   |
|---------------|----|---|---|---|
| Aatk          | 10 | 0 | 0 | 0 |
| Azi1          | 2  | 0 | 0 | 0 |
| 2410002I01Rik | 3  | 0 | 0 | 0 |
| Slc38a10      | 9  | 0 | 0 | 0 |
| 2810410L24Rik | 4  | 0 | 0 | 0 |
| AK013668      | 1  | 0 | 0 | 0 |
| Nploc4        | 3  | 0 | 0 | 0 |
| Fam195b       | 1  | 0 | 0 | 0 |
| P4hb          | 4  | 0 | 0 | 0 |
| Arhgdia       | 3  | 0 | 0 | 0 |
| Thoc4         | 3  | 0 | 0 | 0 |
| Pcyt2         | 8  | 0 | 0 | 0 |
| Sirt7         | 10 | 0 | 0 | 0 |
| Pycr1         | 1  | 0 | 0 | 0 |
| Myadml2       | 1  | 0 | 0 | 0 |
| Notum         | 5  | 0 | 0 | 0 |
| Dcxr          | 3  | 0 | 0 | 0 |
| Dus1l         | 2  | 0 | 0 | 0 |
| Ccdc57        | 11 | 0 | 0 | 0 |
| Csnk1d        | 4  | 0 | 0 | 0 |
| BC017643      | 4  | 0 | 0 | 0 |
| Wdr45l        | 4  | 0 | 0 | 0 |
| Patz1         | 1  | 0 | 0 | 0 |
| mazr          | 4  | 0 | 0 | 0 |
| Pla2g3        | 1  | 0 | 0 | 0 |
| Gal3st1       | 4  | 0 | 0 | 0 |
| Zmat5         | 2  | 0 | 0 | 0 |
| Ap1b1         | 3  | 0 | 0 | 0 |
| XLOC_003916   | 1  | 0 | 0 | 0 |
| XLOC_003924   | 1  | 0 | 0 | 0 |
| XLOC_003926   | 5  | 0 | 0 | 0 |
| Pus10         | 4  | 0 | 0 | 0 |
| Gm12082       | 1  | 0 | 0 | 0 |
| XLOC_003978   | 1  | 0 | 0 | 0 |
| XLOC_003980   | 1  | 0 | 0 | 0 |
| Stk10         | 2  | 0 | 0 | 0 |
| Trim7         | 4  | 0 | 0 | 0 |
| Olfir56       | 2  | 0 | 0 | 0 |
| 4933439C10Rik | 2  | 0 | 0 | 0 |
| Rai1          | 4  | 0 | 0 | 0 |
| Tnfrsf13b     | 2  | 0 | 0 | 0 |
| Pigl          | 2  | 0 | 0 | 0 |
| 2810001G20Rik | 1  | 0 | 0 | 0 |
| Elac2         | 4  | 0 | 0 | 0 |
| Myh8          | 4  | 0 | 0 | 0 |
| 1810027O10Rik | 2  | 0 | 0 | 0 |
| Asgr2         | 1  | 0 | 0 | 0 |



|               |    |   |   |   |
|---------------|----|---|---|---|
| Mgl2          | 3  | 0 | 0 | 0 |
| Slc16a11      | 1  | 0 | 0 | 0 |
| P2rx5         | 3  | 0 | 0 | 0 |
| Smg6          | 5  | 0 | 0 | 0 |
| Smyd4         | 4  | 0 | 0 | 0 |
| Scarf1        | 2  | 0 | 0 | 0 |
| Inpp5k        | 3  | 0 | 0 | 0 |
| Rnmtl1        | 1  | 0 | 0 | 0 |
| 2210008F06Rik | 2  | 0 | 0 | 0 |
| Abhd15        | 2  | 0 | 0 | 0 |
| Proca1        | 6  | 0 | 0 | 0 |
| Poldip2       | 2  | 0 | 0 | 0 |
| Zfp207        | 4  | 0 | 0 | 0 |
| XLOC_004300   | 1  | 0 | 0 | 0 |
| XLOC_004306   | 2  | 0 | 0 | 0 |
| XLOC_004307   | 2  | 0 | 0 | 0 |
| XLOC_004308   | 2  | 0 | 0 | 0 |
| AA465934      | 2  | 0 | 0 | 0 |
| XLOC_004337   | 3  | 0 | 0 | 0 |
| Gngt2         | 7  | 0 | 0 | 0 |
| Snf8          | 4  | 0 | 0 | 0 |
| Hoxb7         | 2  | 0 | 0 | 0 |
| D030028A08Rik | 3  | 0 | 0 | 0 |
| XLOC_004427   | 1  | 0 | 0 | 0 |
| AK141527      | 1  | 0 | 0 | 0 |
| Gsdma         | 1  | 0 | 0 | 0 |
| Mlx           | 1  | 0 | 0 | 0 |
| Rpl27-ps2     | 1  | 0 | 0 | 0 |
| Higd1b        | 1  | 0 | 0 | 0 |
| XLOC_004496   | 2  | 0 | 0 | 0 |
| Tanc2         | 5  | 0 | 0 | 0 |
| XLOC_004541   | 10 | 0 | 0 | 0 |
| Dnaic2        | 10 | 0 | 0 | 0 |
| XLOC_004545   | 2  | 0 | 0 | 0 |
| XLOC_004553   | 1  | 0 | 0 | 0 |
| Mrps7         | 2  | 0 | 0 | 0 |
| 1110017F19Rik | 1  | 0 | 0 | 0 |
| Tnrc6c        | 7  | 0 | 0 | 0 |
| AK005967      | 1  | 0 | 0 | 0 |
| AK163532      | 1  | 0 | 0 | 0 |
| Aspscr1       | 4  | 0 | 0 | 0 |
| Inpp5j        | 5  | 0 | 0 | 0 |
| Urgcp         | 3  | 0 | 0 | 0 |
| Ddc           | 3  | 0 | 0 | 0 |
| Sec61g        | 2  | 0 | 0 | 0 |
| Commd1        | 3  | 0 | 0 | 0 |
| XLOC_004728   | 1  | 0 | 0 | 0 |

|               |   |   |   |   |
|---------------|---|---|---|---|
| Rps27a        | 2 | 0 | 0 | 0 |
| Ankrd43       | 1 | 0 | 0 | 0 |
| Gjc2          | 1 | 0 | 0 | 0 |
| Gm16515       | 2 | 0 | 0 | 0 |
| XLOC_004901   | 1 | 0 | 0 | 0 |
| XLOC_004908   | 1 | 0 | 0 | 0 |
| Cenpv         | 4 | 0 | 0 | 0 |
| Gm12279       | 2 | 0 | 0 | 0 |
| 2310004I24Rik | 5 | 0 | 0 | 0 |
| AK010044      | 2 | 0 | 0 | 0 |
| Wdr16         | 5 | 0 | 0 | 0 |
| BC096441      | 1 | 0 | 0 | 0 |
| Tmem95        | 1 | 0 | 0 | 0 |
| Pfn1          | 1 | 0 | 0 | 0 |
| Inca1         | 1 | 0 | 0 | 0 |
| Cyb5d2        | 2 | 0 | 0 | 0 |
| Tmem93        | 3 | 0 | 0 | 0 |
| Sgsm2         | 6 | 0 | 0 | 0 |
| Evi2a         | 1 | 0 | 0 | 0 |
| Pex12         | 2 | 0 | 0 | 0 |
| Pigw          | 2 | 0 | 0 | 0 |
| Tmem49        | 7 | 0 | 0 | 0 |
| Nog           | 1 | 0 | 0 | 0 |
| Nme2          | 2 | 0 | 0 | 0 |
| Mycbpap       | 4 | 0 | 0 | 0 |
| AK027957      | 4 | 0 | 0 | 0 |
| B4galnt2      | 1 | 0 | 0 | 0 |
| Lrrc46        | 1 | 0 | 0 | 0 |
| Pip4k2b       | 4 | 0 | 0 | 0 |
| Krt16         | 2 | 0 | 0 | 0 |
| Ccr10         | 1 | 0 | 0 | 0 |
| Brca1         | 3 | 0 | 0 | 0 |
| AK144330      | 2 | 0 | 0 | 0 |
| Gfap          | 5 | 0 | 0 | 0 |
| AK010390      | 1 | 0 | 0 | 0 |
| XLOC_005249   | 1 | 0 | 0 | 0 |
| XLOC_005254   | 1 | 0 | 0 | 0 |
| Ftsj3         | 4 | 0 | 0 | 0 |
| MtPolB        | 2 | 0 | 0 | 0 |
| Slc16a6       | 2 | 0 | 0 | 0 |
| XLOC_005304   | 1 | 0 | 0 | 0 |
| Slc39a11      | 2 | 0 | 0 | 0 |
| XLOC_005312   | 1 | 0 | 0 | 0 |
| Atp5h         | 3 | 0 | 0 | 0 |
| Grb2          | 8 | 0 | 0 | 0 |
| XLOC_005367   | 2 | 0 | 0 | 0 |
| 2310003H01Rik | 3 | 0 | 0 | 0 |

|                |   |   |   |   |
|----------------|---|---|---|---|
| Arl16          | 2 | 0 | 0 | 0 |
| 1110031I02Rik  | 2 | 0 | 0 | 0 |
| Abca13         | 1 | 0 | 0 | 0 |
| Fbxo48         | 1 | 0 | 0 | 0 |
| XLOC_003966    | 1 | 0 | 0 | 0 |
| XLOC_003974    | 1 | 0 | 0 | 0 |
| Hbq1b          | 1 | 0 | 0 | 0 |
| Rapgef6        | 6 | 0 | 0 | 0 |
| Gm12250        | 1 | 0 | 0 | 0 |
| Gm12299        | 1 | 0 | 0 | 0 |
| Aurkb          | 1 | 0 | 0 | 0 |
| XLOC_004192    | 1 | 0 | 0 | 0 |
| E130309D14Rik  | 2 | 0 | 0 | 0 |
| Tsr1           | 2 | 0 | 0 | 0 |
| XLOC_004263    | 3 | 0 | 0 | 0 |
| XLOC_004285    | 2 | 0 | 0 | 0 |
| Sfn4           | 2 | 0 | 0 | 0 |
| Gm11442        | 1 | 0 | 0 | 0 |
| Pthr2          | 1 | 0 | 0 | 0 |
| AK040276       | 2 | 0 | 0 | 0 |
| XLOC_004367    | 2 | 0 | 0 | 0 |
| XLOC_004396    | 1 | 0 | 0 | 0 |
| Phb            | 4 | 0 | 0 | 0 |
| AK133925       | 1 | 0 | 0 | 0 |
| Stat5a         | 3 | 0 | 0 | 0 |
| Ccdc103        | 6 | 0 | 0 | 0 |
| Wnt3           | 1 | 0 | 0 | 0 |
| Tcam1          | 1 | 0 | 0 | 0 |
| XLOC_004519    | 1 | 0 | 0 | 0 |
| Fam100b        | 2 | 0 | 0 | 0 |
| XLOC_004572    | 1 | 0 | 0 | 0 |
| Sec14l2        | 2 | 0 | 0 | 0 |
| Pgam2          | 2 | 0 | 0 | 0 |
| Myl7           | 1 | 0 | 0 | 0 |
| Gm12000        | 1 | 0 | 0 | 0 |
| XLOC_004704    | 3 | 0 | 0 | 0 |
| 4930505A04Rik  | 2 | 0 | 0 | 0 |
| XLOC_004760    | 1 | 0 | 0 | 0 |
| 9930111J21Rik2 | 1 | 0 | 0 | 0 |
| Gm12199        | 1 | 0 | 0 | 0 |
| Ccdc69         | 3 | 0 | 0 | 0 |
| Zfp39          | 1 | 0 | 0 | 0 |
| Rasd1          | 1 | 0 | 0 | 0 |
| Slc5a10        | 2 | 0 | 0 | 0 |
| Dnahc9         | 6 | 0 | 0 | 0 |
| Tnfsf12        | 1 | 0 | 0 | 0 |
| Chrn1          | 1 | 0 | 0 | 0 |

|               |   |   |   |   |
|---------------|---|---|---|---|
| Slc2a4        | 3 | 0 | 0 | 0 |
| A430084P05Rik | 2 | 0 | 0 | 0 |
| Slc13a5       | 4 | 0 | 0 | 0 |
| AK076313      | 1 | 0 | 0 | 0 |
| Rph3a1        | 3 | 0 | 0 | 0 |
| Evi2b         | 2 | 0 | 0 | 0 |
| XLOC_005055   | 1 | 0 | 0 | 0 |
| Sfn8          | 3 | 0 | 0 | 0 |
| Dlx4          | 1 | 0 | 0 | 0 |
| Fbxo47        | 1 | 0 | 0 | 0 |
| 2810433D01Rik | 1 | 0 | 0 | 0 |
| Plcd3         | 1 | 0 | 0 | 0 |
| XLOC_005265   | 1 | 0 | 0 | 0 |
| Cd300lh       | 3 | 0 | 0 | 0 |
| Grin2c        | 1 | 0 | 0 | 0 |
| Cd7           | 2 | 0 | 0 | 0 |
| AK050795      | 1 | 0 | 0 | 0 |
| Pik3ip1       | 1 | 0 | 0 | 0 |
| XLOC_003930   | 1 | 0 | 0 | 0 |
| Ikzf1         | 1 | 0 | 0 | 0 |
| Gm12034       | 1 | 0 | 0 | 0 |
| XLOC_003992   | 5 | 0 | 0 | 0 |
| XLOC_004045   | 1 | 0 | 0 | 0 |
| XLOC_004063   | 2 | 0 | 0 | 0 |
| XLOC_004111   | 1 | 0 | 0 | 0 |
| Tax1bp3       | 2 | 0 | 0 | 0 |
| XLOC_004240   | 1 | 0 | 0 | 0 |
| Tmem98        | 1 | 0 | 0 | 0 |
| Sfn1          | 1 | 0 | 0 | 0 |
| Mbtd1         | 7 | 0 | 0 | 0 |
| XLOC_004391   | 1 | 0 | 0 | 0 |
| AK078566      | 1 | 0 | 0 | 0 |
| XLOC_004437   | 1 | 0 | 0 | 0 |
| XLOC_004451   | 1 | 0 | 0 | 0 |
| Tmub2         | 1 | 0 | 0 | 0 |
| XLOC_004487   | 1 | 0 | 0 | 0 |
| Gm11652       | 1 | 0 | 0 | 0 |
| Gm885         | 1 | 0 | 0 | 0 |
| XLOC_004550   | 1 | 0 | 0 | 0 |
| XLOC_004584   | 1 | 0 | 0 | 0 |
| XLOC_004630   | 1 | 0 | 0 | 0 |
| XLOC_004719   | 1 | 0 | 0 | 0 |
| Zfp879        | 3 | 0 | 0 | 0 |
| Ntn1          | 1 | 0 | 0 | 0 |
| Cyb5d1        | 3 | 0 | 0 | 0 |
| Tnk1          | 2 | 0 | 0 | 0 |
| Spns3         | 5 | 0 | 0 | 0 |

|               |   |   |   |   |
|---------------|---|---|---|---|
| Trp53i13      | 1 | 0 | 0 | 0 |
| Sfn9          | 4 | 0 | 0 | 0 |
| AM295304      | 1 | 0 | 0 | 0 |
| Krt25         | 1 | 0 | 0 | 0 |
| Kcnh4         | 5 | 0 | 0 | 0 |
| Kpna2         | 2 | 0 | 0 | 0 |
| Cd300ld       | 1 | 0 | 0 | 0 |
| Sumo2         | 2 | 0 | 0 | 0 |
| Slit3         | 1 | 0 | 0 | 0 |
| XLOC_004013   | 1 | 0 | 0 | 0 |
| XLOC_004027   | 1 | 0 | 0 | 0 |
| XLOC_004034   | 2 | 0 | 0 | 0 |
| 3010026O09Rik | 1 | 0 | 0 | 0 |
| Gdf9          | 2 | 0 | 0 | 0 |
| XLOC_004075   | 1 | 0 | 0 | 0 |
| Trim17        | 1 | 0 | 0 | 0 |
| Lrrc48        | 2 | 0 | 0 | 0 |
| Eno3          | 1 | 0 | 0 | 0 |
| XLOC_004229   | 1 | 0 | 0 | 0 |
| Tmigd1        | 1 | 0 | 0 | 0 |
| Coro6         | 4 | 0 | 0 | 0 |
| XLOC_004287   | 1 | 0 | 0 | 0 |
| Gm10022       | 1 | 0 | 0 | 0 |
| Tubg1         | 1 | 0 | 0 | 0 |
| Cntd1         | 1 | 0 | 0 | 0 |
| Allergin-1    | 1 | 0 | 0 | 0 |
| Slc9a3r1      | 2 | 0 | 0 | 0 |
| XLOC_004590   | 2 | 0 | 0 | 0 |
| Fn3k          | 1 | 0 | 0 | 0 |
| 4921536K21Rik | 2 | 0 | 0 | 0 |
| XLOC_004645   | 1 | 0 | 0 | 0 |
| Znrf3         | 1 | 0 | 0 | 0 |
| XLOC_004660   | 1 | 0 | 0 | 0 |
| mKIAA1068     | 1 | 0 | 0 | 0 |
| Npc1l1        | 1 | 0 | 0 | 0 |
| BC079904      | 1 | 0 | 0 | 0 |
| XLOC_004871   | 1 | 0 | 0 | 0 |
| Kiaa0753      | 1 | 0 | 0 | 0 |
| Ccl3          | 1 | 0 | 0 | 0 |
| Gm12576       | 2 | 0 | 0 | 0 |
| Jmjd6         | 2 | 0 | 0 | 0 |
| Dnahc17       | 1 | 0 | 0 | 0 |
| Pde6g         | 2 | 0 | 0 | 0 |
| Rfng          | 1 | 0 | 0 | 0 |
| Sectm1a       | 1 | 0 | 0 | 0 |
| XLOC_003991   | 1 | 0 | 0 | 0 |
| 2310033P09Rik | 2 | 0 | 0 | 0 |

|               |    |   |   |   |
|---------------|----|---|---|---|
| Hs3st3a1      | 1  | 0 | 0 | 0 |
| Gm11427       | 1  | 0 | 0 | 0 |
| Gm11520       | 1  | 0 | 0 | 0 |
| cdc6          | 1  | 0 | 0 | 0 |
| Nags          | 1  | 0 | 0 | 0 |
| XLOC_004503   | 1  | 0 | 0 | 0 |
| Apoh          | 1  | 0 | 0 | 0 |
| XLOC_004580   | 1  | 0 | 0 | 0 |
| XLOC_004594   | 1  | 0 | 0 | 0 |
| Plek          | 1  | 0 | 0 | 0 |
| Zfp454        | 2  | 0 | 0 | 0 |
| Tmem102       | 1  | 0 | 0 | 0 |
| Spag7         | 1  | 0 | 0 | 0 |
| Gm11515       | 1  | 0 | 0 | 0 |
| Gm11536       | 1  | 0 | 0 | 0 |
| Gm12355       | 1  | 0 | 0 | 0 |
| 4933400C05Rik | 1  | 0 | 0 | 0 |
| XLOC_005258   | 1  | 0 | 0 | 0 |
| Smarcd2       | 1  | 0 | 0 | 0 |
| Evpl          | 1  | 0 | 0 | 0 |
| XLOC_006538   | 1  | 0 | 0 | 0 |
| Kif3c         | 3  | 0 | 0 | 0 |
| XLOC_006542   | 2  | 0 | 0 | 0 |
| Dnmt3a        | 12 | 0 | 0 | 0 |
| Dnajc27       | 6  | 0 | 0 | 0 |
| Adcy3         | 6  | 0 | 0 | 0 |
| BC067010      | 2  | 0 | 0 | 0 |
| XLOC_006549   | 3  | 0 | 0 | 0 |
| Itsn2         | 6  | 0 | 0 | 0 |
| Atad2b        | 7  | 0 | 0 | 0 |
| 2810032G03Rik | 2  | 0 | 0 | 0 |
| XLOC_006559   | 2  | 0 | 0 | 0 |
| 1110057K04Rik | 2  | 0 | 0 | 0 |
| XLOC_006561   | 5  | 0 | 0 | 0 |
| Hs1bp3        | 3  | 0 | 0 | 0 |
| Pum2          | 9  | 0 | 0 | 0 |
| Wdr35         | 3  | 0 | 0 | 0 |
| Ttc32         | 2  | 0 | 0 | 0 |
| Rdh14         | 2  | 0 | 0 | 0 |
| XLOC_006574   | 3  | 0 | 0 | 0 |
| Smc6          | 2  | 0 | 0 | 0 |
| Rad51ap2      | 2  | 0 | 0 | 0 |
| Fam49a        | 5  | 0 | 0 | 0 |
| XLOC_006578   | 2  | 0 | 0 | 0 |
| XLOC_006579   | 1  | 0 | 0 | 0 |
| XLOC_006580   | 2  | 0 | 0 | 0 |
| XLOC_006581   | 3  | 0 | 0 | 0 |

|             |    |   |   |   |
|-------------|----|---|---|---|
| Nbas        | 10 | 0 | 0 | 0 |
| XLOC_006586 | 6  | 0 | 0 | 0 |
| AK045700    | 1  | 0 | 0 | 0 |
| XLOC_006588 | 1  | 0 | 0 | 0 |
| Ntsr2       | 6  | 0 | 0 | 0 |
| E2f6        | 5  | 0 | 0 | 0 |
| Rock2       | 1  | 0 | 0 | 0 |
| Pdia6       | 1  | 0 | 0 | 0 |
| Nol10       | 5  | 0 | 0 | 0 |
| XLOC_006602 | 2  | 0 | 0 | 0 |
| Cpsf3       | 3  | 0 | 0 | 0 |
| AK133650    | 1  | 0 | 0 | 0 |
| XLOC_006609 | 3  | 0 | 0 | 0 |
| Taf1b       | 5  | 0 | 0 | 0 |
| Grhl1       | 6  | 0 | 0 | 0 |
| Klf11       | 3  | 0 | 0 | 0 |
| Mboat2      | 3  | 0 | 0 | 0 |
| Kidins220   | 4  | 0 | 0 | 0 |
| Cmpk2       | 2  | 0 | 0 | 0 |
| Rnaseh1     | 2  | 0 | 0 | 0 |
| Adi1        | 1  | 0 | 0 | 0 |
| Tssc1       | 2  | 0 | 0 | 0 |
| XLOC_006629 | 1  | 0 | 0 | 0 |
| Myt1l       | 8  | 0 | 0 | 0 |
| Pxdn        | 9  | 0 | 0 | 0 |
| Tmem18      | 1  | 0 | 0 | 0 |
| Sh3yl1      | 1  | 0 | 0 | 0 |
| Lamb1       | 5  | 0 | 0 | 0 |
| Cog5        | 4  | 0 | 0 | 0 |
| Nampt       | 3  | 0 | 0 | 0 |
| Sypl        | 2  | 0 | 0 | 0 |
| Atxn7l1     | 7  | 0 | 0 | 0 |
| Efcab10     | 2  | 0 | 0 | 0 |
| Twistnb     | 1  | 0 | 0 | 0 |
| Twist1      | 1  | 0 | 0 | 0 |
| Snx13       | 9  | 0 | 0 | 0 |
| Ankmy2      | 1  | 0 | 0 | 0 |
| Sostdc1     | 1  | 0 | 0 | 0 |
| Ispd        | 4  | 0 | 0 | 0 |
| Meox2       | 1  | 0 | 0 | 0 |
| Tmem195     | 2  | 0 | 0 | 0 |
| Dgkb        | 5  | 0 | 0 | 0 |
| Dock4       | 3  | 0 | 0 | 0 |
| Pnpla8      | 3  | 0 | 0 | 0 |
| Nrcam       | 7  | 0 | 0 | 0 |
| XLOC_006658 | 9  | 0 | 0 | 0 |
| G2e3        | 6  | 0 | 0 | 0 |

|               |   |   |   |   |
|---------------|---|---|---|---|
| Scfd1         | 1 | 0 | 0 | 0 |
| Ap4s1         | 2 | 0 | 0 | 0 |
| Nubpl         | 4 | 0 | 0 | 0 |
| Akap6         | 5 | 0 | 0 | 0 |
| Srp54a        | 4 | 0 | 0 | 0 |
| Srp54c        | 2 | 0 | 0 | 0 |
| Psm6          | 1 | 0 | 0 | 0 |
| Aldoa         | 7 | 0 | 0 | 0 |
| Brms1l        | 1 | 0 | 0 | 0 |
| Prps1l3       | 2 | 0 | 0 | 0 |
| Mipol1        | 1 | 0 | 0 | 0 |
| Sip1          | 2 | 0 | 0 | 0 |
| Pnn           | 1 | 0 | 0 | 0 |
| XLOC_006684   | 3 | 0 | 0 | 0 |
| Lrfr5         | 6 | 0 | 0 | 0 |
| Fam179b       | 3 | 0 | 0 | 0 |
| Fancm         | 4 | 0 | 0 | 0 |
| 9330151L19Rik | 1 | 0 | 0 | 0 |
| Klhdc1        | 5 | 0 | 0 | 0 |
| Klhdc2        | 3 | 0 | 0 | 0 |
| XLOC_006699   | 6 | 0 | 0 | 0 |
| Atp5s         | 5 | 0 | 0 | 0 |
| Atl1          | 7 | 0 | 0 | 0 |
| Tmx1          | 2 | 0 | 0 | 0 |
| Actr10        | 1 | 0 | 0 | 0 |
| Psm3          | 9 | 0 | 0 | 0 |
| Arid4a        | 4 | 0 | 0 | 0 |
| 2700049A03Rik | 6 | 0 | 0 | 0 |
| Daam1         | 5 | 0 | 0 | 0 |
| Jkamp         | 4 | 0 | 0 | 0 |
| Lrrc9         | 5 | 0 | 0 | 0 |
| 1810048J11Rik | 2 | 0 | 0 | 0 |
| Mnat1         | 3 | 0 | 0 | 0 |
| XLOC_006723   | 1 | 0 | 0 | 0 |
| Hif1a         | 6 | 0 | 0 | 0 |
| Snapc1        | 6 | 0 | 0 | 0 |
| Syt16         | 4 | 0 | 0 | 0 |
| 1700086L19Rik | 1 | 0 | 0 | 0 |
| Rhoj          | 2 | 0 | 0 | 0 |
| Mthfd1        | 5 | 0 | 0 | 0 |
| Zbtb1         | 5 | 0 | 0 | 0 |
| Hspa2         | 3 | 0 | 0 | 0 |
| Gm70          | 3 | 0 | 0 | 0 |
| Gm10451       | 1 | 0 | 0 | 0 |
| Churc1        | 3 | 0 | 0 | 0 |
| Fntb          | 1 | 0 | 0 | 0 |
| Fut8          | 6 | 0 | 0 | 0 |



|               |    |   |   |   |
|---------------|----|---|---|---|
| Gphn          | 6  | 0 | 0 | 0 |
| Mpp5          | 5  | 0 | 0 | 0 |
| Eif2s1        | 1  | 0 | 0 | 0 |
| Plekhh1       | 3  | 0 | 0 | 0 |
| Rdh12         | 5  | 0 | 0 | 0 |
| Exd2          | 5  | 0 | 0 | 0 |
| Galnt1        | 4  | 0 | 0 | 0 |
| Slc39a9       | 2  | 0 | 0 | 0 |
| 3830431G21Rik | 4  | 0 | 0 | 0 |
| 4933426M11Rik | 6  | 0 | 0 | 0 |
| Smoc1         | 7  | 0 | 0 | 0 |
| Ttc9          | 2  | 0 | 0 | 0 |
| Pcnx          | 7  | 0 | 0 | 0 |
| Sipa1l1       | 5  | 0 | 0 | 0 |
| Dcaf4         | 4  | 0 | 0 | 0 |
| Rbm25         | 3  | 0 | 0 | 0 |
| Psen1         | 4  | 0 | 0 | 0 |
| Acot2         | 2  | 0 | 0 | 0 |
| Acot1         | 2  | 0 | 0 | 0 |
| Acot6         | 1  | 0 | 0 | 0 |
| Dnalc1        | 3  | 0 | 0 | 0 |
| Coq6          | 2  | 0 | 0 | 0 |
| Lin52         | 2  | 0 | 0 | 0 |
| Isca2         | 4  | 0 | 0 | 0 |
| Ylpm1         | 5  | 0 | 0 | 0 |
| XLOC_006782   | 2  | 0 | 0 | 0 |
| Dlst          | 3  | 0 | 0 | 0 |
| Eif2b2        | 1  | 0 | 0 | 0 |
| Fam164c       | 1  | 0 | 0 | 0 |
| Fos           | 1  | 0 | 0 | 0 |
| Jdp2          | 5  | 0 | 0 | 0 |
| Mfsd7c        | 3  | 0 | 0 | 0 |
| Ttll5         | 6  | 0 | 0 | 0 |
| 1700019E19Rik | 2  | 0 | 0 | 0 |
| Kiaa1152      | 1  | 0 | 0 | 0 |
| 1700020O03Rik | 1  | 0 | 0 | 0 |
| Vash1         | 4  | 0 | 0 | 0 |
| Kiaa1737      | 3  | 0 | 0 | 0 |
| Tmem63c       | 3  | 0 | 0 | 0 |
| Ahsa1         | 1  | 0 | 0 | 0 |
| Adck1         | 6  | 0 | 0 | 0 |
| Nrxn3         | 21 | 0 | 0 | 0 |
| Tshr          | 1  | 0 | 0 | 0 |
| Flrt2         | 3  | 0 | 0 | 0 |
| Gpr65         | 1  | 0 | 0 | 0 |
| Spata7        | 5  | 0 | 0 | 0 |
| Zc3h14        | 7  | 0 | 0 | 0 |

|               |    |   |   |   |
|---------------|----|---|---|---|
| Ttc8          | 4  | 0 | 0 | 0 |
| AK131831      | 2  | 0 | 0 | 0 |
| Tdp1          | 2  | 0 | 0 | 0 |
| Kcnk13        | 5  | 0 | 0 | 0 |
| Psmc1         | 5  | 0 | 0 | 0 |
| Calm1         | 1  | 0 | 0 | 0 |
| AK039577      | 3  | 0 | 0 | 0 |
| 9030617003Rik | 4  | 0 | 0 | 0 |
| Cpsf2         | 2  | 0 | 0 | 0 |
| Slc24a4       | 2  | 0 | 0 | 0 |
| Golga5        | 2  | 0 | 0 | 0 |
| Chga          | 2  | 0 | 0 | 0 |
| D230037D09Rik | 2  | 0 | 0 | 0 |
| Ubr7          | 3  | 0 | 0 | 0 |
| Otub2         | 3  | 0 | 0 | 0 |
| Ifi2711       | 5  | 0 | 0 | 0 |
| Ppp4r4        | 3  | 0 | 0 | 0 |
| Serpina3g     | 3  | 0 | 0 | 0 |
| Serpina3n     | 4  | 0 | 0 | 0 |
| Glr5          | 3  | 0 | 0 | 0 |
| D430019H16Rik | 2  | 0 | 0 | 0 |
| 4933433P14Rik | 1  | 0 | 0 | 0 |
| Papola        | 4  | 0 | 0 | 0 |
| Vrk1          | 5  | 0 | 0 | 0 |
| Gm17052       | 1  | 0 | 0 | 0 |
| Ccnk          | 4  | 0 | 0 | 0 |
| Hhip1         | 6  | 0 | 0 | 0 |
| Cyp46a1       | 3  | 0 | 0 | 0 |
| Eml1          | 6  | 0 | 0 | 0 |
| Evl           | 6  | 0 | 0 | 0 |
| Yy1           | 4  | 0 | 0 | 0 |
| Slc25a47      | 6  | 0 | 0 | 0 |
| Rian          | 8  | 0 | 0 | 0 |
| Mirg          | 13 | 0 | 0 | 0 |
| Ppp2r5c       | 7  | 0 | 0 | 0 |
| Wdr20a        | 6  | 0 | 0 | 0 |
| Tecpr2        | 4  | 0 | 0 | 0 |
| Rcor1         | 6  | 0 | 0 | 0 |
| Traf3         | 4  | 0 | 0 | 0 |
| A230065H16Rik | 3  | 0 | 0 | 0 |
| 1200009I06Rik | 6  | 0 | 0 | 0 |
| Eif5          | 4  | 0 | 0 | 0 |
| Mark3         | 6  | 0 | 0 | 0 |
| Trmt61a       | 3  | 0 | 0 | 0 |
| Klc1          | 14 | 0 | 0 | 0 |
| Zfyve21       | 5  | 0 | 0 | 0 |
| Kif26a        | 5  | 0 | 0 | 0 |

|               |   |   |   |   |
|---------------|---|---|---|---|
| Adssl1        | 2 | 0 | 0 | 0 |
| Siva1         | 3 | 0 | 0 | 0 |
| Zbtb42        | 4 | 0 | 0 | 0 |
| BC022687      | 1 | 0 | 0 | 0 |
| Btbd6         | 3 | 0 | 0 | 0 |
| Pacs2         | 4 | 0 | 0 | 0 |
| Mta1          | 7 | 0 | 0 | 0 |
| Crip2         | 8 | 0 | 0 | 0 |
| 4930427A07Rik | 5 | 0 | 0 | 0 |
| Tmem121       | 1 | 0 | 0 | 0 |
| Zfp386        | 4 | 0 | 0 | 0 |
| Esyt2         | 1 | 0 | 0 | 0 |
| Fam62b        | 4 | 0 | 0 | 0 |
| Ncapg2        | 4 | 0 | 0 | 0 |
| Ptprn2        | 6 | 0 | 0 | 0 |
| Rapgef5       | 1 | 0 | 0 | 0 |
| Cdca7l        | 2 | 0 | 0 | 0 |
| XLOC_006917   | 2 | 0 | 0 | 0 |
| Rab10         | 1 | 0 | 0 | 0 |
| BC048080      | 1 | 0 | 0 | 0 |
| Efr3b         | 7 | 0 | 0 | 0 |
| Ncoa1         | 7 | 0 | 0 | 0 |
| XLOC_006928   | 3 | 0 | 0 | 0 |
| Fkbp1b        | 4 | 0 | 0 | 0 |
| Ubxn2a        | 6 | 0 | 0 | 0 |
| Klhl29        | 5 | 0 | 0 | 0 |
| XLOC_006934   | 1 | 0 | 0 | 0 |
| Slc7a15       | 6 | 0 | 0 | 0 |
| XLOC_006940   | 2 | 0 | 0 | 0 |
| Kcns3         | 8 | 0 | 0 | 0 |
| Vsnl1         | 2 | 0 | 0 | 0 |
| Mycn          | 2 | 0 | 0 | 0 |
| Ddx1          | 4 | 0 | 0 | 0 |
| Fam84a        | 1 | 0 | 0 | 0 |
| Trib2         | 6 | 0 | 0 | 0 |
| Lpin1         | 7 | 0 | 0 | 0 |
| Pqlc3         | 2 | 0 | 0 | 0 |
| Kcnf1         | 1 | 0 | 0 | 0 |
| AK148766      | 4 | 0 | 0 | 0 |
| Itgb1bp1      | 3 | 0 | 0 | 0 |
| Ywhaq         | 4 | 0 | 0 | 0 |
| AK020054      | 1 | 0 | 0 | 0 |
| XLOC_006971   | 2 | 0 | 0 | 0 |
| Gm16372       | 1 | 0 | 0 | 0 |
| Cys1          | 2 | 0 | 0 | 0 |
| Id2           | 1 | 0 | 0 | 0 |
| Rnf144a       | 6 | 0 | 0 | 0 |

|               |    |   |   |   |
|---------------|----|---|---|---|
| Rsad2         | 1  | 0 | 0 | 0 |
| AK163447      | 6  | 0 | 0 | 0 |
| Colec11       | 1  | 0 | 0 | 0 |
| Ttc15         | 3  | 0 | 0 | 0 |
| Dld           | 1  | 0 | 0 | 0 |
| Cbll1         | 6  | 0 | 0 | 0 |
| Bcap29        | 3  | 0 | 0 | 0 |
| Gpr22         | 1  | 0 | 0 | 0 |
| Hbp1          | 2  | 0 | 0 | 0 |
| Prkar2b       | 5  | 0 | 0 | 0 |
| Hdac9         | 13 | 0 | 0 | 0 |
| Ahr           | 2  | 0 | 0 | 0 |
| Tspan13       | 4  | 0 | 0 | 0 |
| Bzw2          | 3  | 0 | 0 | 0 |
| Arl4a         | 2  | 0 | 0 | 0 |
| Scin          | 1  | 0 | 0 | 0 |
| Gm889         | 1  | 0 | 0 | 0 |
| Ifrd1         | 3  | 0 | 0 | 0 |
| Zfp277        | 1  | 0 | 0 | 0 |
| Lrrn3         | 1  | 0 | 0 | 0 |
| Dnajb9        | 1  | 0 | 0 | 0 |
| Stxbp6        | 6  | 0 | 0 | 0 |
| Nova1         | 2  | 0 | 0 | 0 |
| Prkd1         | 2  | 0 | 0 | 0 |
| Strn3         | 5  | 0 | 0 | 0 |
| Hectd1        | 11 | 0 | 0 | 0 |
| 6530401N04Rik | 4  | 0 | 0 | 0 |
| Egln3         | 3  | 0 | 0 | 0 |
| 1110002B05Rik | 2  | 0 | 0 | 0 |
| Eapp          | 2  | 0 | 0 | 0 |
| Gm16382       | 1  | 0 | 0 | 0 |
| Snx6          | 4  | 0 | 0 | 0 |
| Cfl2          | 2  | 0 | 0 | 0 |
| Nfkbia        | 2  | 0 | 0 | 0 |
| Mbip          | 3  | 0 | 0 | 0 |
| Sec23a        | 3  | 0 | 0 | 0 |
| Trappc6b      | 2  | 0 | 0 | 0 |
| Fbxo33        | 2  | 0 | 0 | 0 |
| Klhl28        | 2  | 0 | 0 | 0 |
| Fkbp3         | 2  | 0 | 0 | 0 |
| Mdga2         | 8  | 0 | 0 | 0 |
| 1110034A24Rik | 4  | 0 | 0 | 0 |
| Rpl36al       | 1  | 0 | 0 | 0 |
| Pole2         | 5  | 0 | 0 | 0 |
| Sdccag1       | 5  | 0 | 0 | 0 |
| Gm71          | 6  | 0 | 0 | 0 |
| Sos2          | 2  | 0 | 0 | 0 |

|               |    |   |   |   |
|---------------|----|---|---|---|
| L2hgdh        | 5  | 0 | 0 | 0 |
| Cdk1          | 7  | 0 | 0 | 0 |
| mKIAA1565     | 8  | 0 | 0 | 0 |
| Pygl          | 1  | 0 | 0 | 0 |
| Trim9         | 10 | 0 | 0 | 0 |
| AK014224      | 1  | 0 | 0 | 0 |
| Timm9         | 6  | 0 | 0 | 0 |
| 2810055F11Rik | 3  | 0 | 0 | 0 |
| Rtn1          | 9  | 0 | 0 | 0 |
| Dhrs7         | 1  | 0 | 0 | 0 |
| Six1          | 3  | 0 | 0 | 0 |
| Six4          | 1  | 0 | 0 | 0 |
| Trmt5         | 5  | 0 | 0 | 0 |
| Tmem30b       | 1  | 0 | 0 | 0 |
| Kcnh5         | 1  | 0 | 0 | 0 |
| Ppp2r5e       | 2  | 0 | 0 | 0 |
| Wdr89         | 2  | 0 | 0 | 0 |
| Sgpp1         | 3  | 0 | 0 | 0 |
| XLOC_007078   | 1  | 0 | 0 | 0 |
| Spnb1         | 2  | 0 | 0 | 0 |
| Rab15         | 5  | 0 | 0 | 0 |
| Max           | 3  | 0 | 0 | 0 |
| Atp6v1d       | 5  | 0 | 0 | 0 |
| Plek2         | 2  | 0 | 0 | 0 |
| Tmem229b      | 8  | 0 | 0 | 0 |
| Pigh          | 2  | 0 | 0 | 0 |
| Vti1b         | 6  | 0 | 0 | 0 |
| Rdh11         | 2  | 0 | 0 | 0 |
| Zfyve26       | 6  | 0 | 0 | 0 |
| Zfp36l1       | 1  | 0 | 0 | 0 |
| 2310015A10Rik | 1  | 0 | 0 | 0 |
| Actn1         | 8  | 0 | 0 | 0 |
| Dcaf5         | 4  | 0 | 0 | 0 |
| Erh           | 3  | 0 | 0 | 0 |
| Gm1568        | 1  | 0 | 0 | 0 |
| AK145430      | 3  | 0 | 0 | 0 |
| Cox16         | 2  | 0 | 0 | 0 |
| Synj2bp       | 4  | 0 | 0 | 0 |
| Med6          | 8  | 0 | 0 | 0 |
| Map3k9        | 2  | 0 | 0 | 0 |
| Dpf3          | 5  | 0 | 0 | 0 |
| Zfyve1        | 6  | 0 | 0 | 0 |
| Numb          | 4  | 0 | 0 | 0 |
| C130039O16Rik | 4  | 0 | 0 | 0 |
| Gm5436        | 1  | 0 | 0 | 0 |
| Fam161b       | 4  | 0 | 0 | 0 |
| Aldh6a1       | 2  | 0 | 0 | 0 |

|               |   |   |   |   |
|---------------|---|---|---|---|
| Abcd4         | 4 | 0 | 0 | 0 |
| Tmem90a       | 3 | 0 | 0 | 0 |
| Npc2          | 1 | 0 | 0 | 0 |
| Ltbp2         | 7 | 0 | 0 | 0 |
| 1110018G07Rik | 7 | 0 | 0 | 0 |
| Rps6kl1       | 2 | 0 | 0 | 0 |
| Pgf           | 3 | 0 | 0 | 0 |
| Mlh3          | 6 | 0 | 0 | 0 |
| Acyp1         | 5 | 0 | 0 | 0 |
| Nek9          | 6 | 0 | 0 | 0 |
| Tmed10        | 7 | 0 | 0 | 0 |
| 0610007P14Rik | 2 | 0 | 0 | 0 |
| Tgfb3         | 4 | 0 | 0 | 0 |
| Angel1        | 3 | 0 | 0 | 0 |
| Zdhhc22       | 3 | 0 | 0 | 0 |
| Ngb           | 2 | 0 | 0 | 0 |
| Pomt2         | 1 | 0 | 0 | 0 |
| Tmed8         | 3 | 0 | 0 | 0 |
| Ism2          | 8 | 0 | 0 | 0 |
| Sptlc2        | 1 | 0 | 0 | 0 |
| Snw1          | 1 | 0 | 0 | 0 |
| XLOC_007151   | 5 | 0 | 0 | 0 |
| 4930534B04Rik | 4 | 0 | 0 | 0 |
| Gtf2a1        | 7 | 0 | 0 | 0 |
| Ston2         | 4 | 0 | 0 | 0 |
| Sel1l         | 4 | 0 | 0 | 0 |
| Gm6863        | 1 | 0 | 0 | 0 |
| Galc          | 4 | 0 | 0 | 0 |
| Kcnk10        | 5 | 0 | 0 | 0 |
| Ptpn21        | 8 | 0 | 0 | 0 |
| Foxn3         | 3 | 0 | 0 | 0 |
| Ttc7b         | 9 | 0 | 0 | 0 |
| Rps6ka5       | 3 | 0 | 0 | 0 |
| Gpr68         | 2 | 0 | 0 | 0 |
| Smek1         | 4 | 0 | 0 | 0 |
| Fbln5         | 4 | 0 | 0 | 0 |
| Atxn3         | 6 | 0 | 0 | 0 |
| Lgmn          | 4 | 0 | 0 | 0 |
| Itpk1         | 6 | 0 | 0 | 0 |
| Moap1         | 2 | 0 | 0 | 0 |
| Btbd7         | 2 | 0 | 0 | 0 |
| Prima1        | 4 | 0 | 0 | 0 |
| Ddx24         | 3 | 0 | 0 | 0 |
| Ifi27l2a      | 4 | 0 | 0 | 0 |
| Serpina10     | 2 | 0 | 0 | 0 |
| Serpina1e     | 1 | 0 | 0 | 0 |
| Serpina11     | 2 | 0 | 0 | 0 |

|               |    |   |   |   |
|---------------|----|---|---|---|
| Dicer1        | 3  | 0 | 0 | 0 |
| 4831426I19Rik | 6  | 0 | 0 | 0 |
| Snhg10        | 2  | 0 | 0 | 0 |
| Atg2b         | 2  | 0 | 0 | 0 |
| XLOC_007201   | 8  | 0 | 0 | 0 |
| Bcl11b        | 4  | 0 | 0 | 0 |
| Setd3         | 10 | 0 | 0 | 0 |
| Slc25a29      | 2  | 0 | 0 | 0 |
| Wars          | 2  | 0 | 0 | 0 |
| Hsp90aa1      | 8  | 0 | 0 | 0 |
| Cinp          | 1  | 0 | 0 | 0 |
| Cdc42bpb      | 5  | 0 | 0 | 0 |
| AK080484      | 3  | 0 | 0 | 0 |
| AK012841      | 2  | 0 | 0 | 0 |
| Ckb           | 5  | 0 | 0 | 0 |
| Ppp1r13b      | 4  | 0 | 0 | 0 |
| 2010107E04Rik | 3  | 0 | 0 | 0 |
| Tmem179       | 6  | 0 | 0 | 0 |
| XLOC_007233   | 1  | 0 | 0 | 0 |
| Ahnak2        | 1  | 0 | 0 | 0 |
| Cdca4         | 2  | 0 | 0 | 0 |
| Jag2          | 6  | 0 | 0 | 0 |
| Nudt14        | 2  | 0 | 0 | 0 |
| Brf1          | 4  | 0 | 0 | 0 |
| Ighg          | 1  | 0 | 0 | 0 |
| Wdr60         | 6  | 0 | 0 | 0 |
| D430020J02Rik | 2  | 0 | 0 | 0 |
| Sp4           | 3  | 0 | 0 | 0 |
| Itgb8         | 3  | 0 | 0 | 0 |
| XLOC_006548   | 3  | 0 | 0 | 0 |
| Pfn4          | 4  | 0 | 0 | 0 |
| 0610009D07Rik | 1  | 0 | 0 | 0 |
| AK050516      | 3  | 0 | 0 | 0 |
| XLOC_006573   | 1  | 0 | 0 | 0 |
| XLOC_006601   | 2  | 0 | 0 | 0 |
| Iah1          | 4  | 0 | 0 | 0 |
| Fam150b       | 2  | 0 | 0 | 0 |
| Prpf39        | 3  | 0 | 0 | 0 |
| Arf6          | 1  | 0 | 0 | 0 |
| XLOC_006704   | 2  | 0 | 0 | 0 |
| XLOC_006707   | 2  | 0 | 0 | 0 |
| Frdm6         | 4  | 0 | 0 | 0 |
| Slc38a6       | 7  | 0 | 0 | 0 |
| Papln         | 3  | 0 | 0 | 0 |
| Ptgr2         | 1  | 0 | 0 | 0 |
| Samd15        | 1  | 0 | 0 | 0 |
| AK153660      | 1  | 0 | 0 | 0 |

|               |   |   |   |   |
|---------------|---|---|---|---|
| Wdr25         | 9 | 0 | 0 | 0 |
| Dlk1          | 1 | 0 | 0 | 0 |
| Meg3          | 8 | 0 | 0 | 0 |
| XLOC_006870   | 1 | 0 | 0 | 0 |
| XLOC_006887   | 1 | 0 | 0 | 0 |
| 2810002N01Rik | 1 | 0 | 0 | 0 |
| 1110002L01Rik | 3 | 0 | 0 | 0 |
| XLOC_006922   | 1 | 0 | 0 | 0 |
| Cenpo         | 1 | 0 | 0 | 0 |
| A830093I24Rik | 1 | 0 | 0 | 0 |
| Mfsd2b        | 6 | 0 | 0 | 0 |
| Adam17        | 1 | 0 | 0 | 0 |
| Rps7          | 3 | 0 | 0 | 0 |
| Sntg2         | 5 | 0 | 0 | 0 |
| XLOC_006996   | 1 | 0 | 0 | 0 |
| Ppp2r3c       | 4 | 0 | 0 | 0 |
| Rps29         | 2 | 0 | 0 | 0 |
| Map4k5        | 3 | 0 | 0 | 0 |
| Sav1          | 1 | 0 | 0 | 0 |
| Nin           | 1 | 0 | 0 | 0 |
| XLOC_007073   | 1 | 0 | 0 | 0 |
| Gpx2          | 2 | 0 | 0 | 0 |
| XLOC_007095   | 3 | 0 | 0 | 0 |
| Eml5          | 1 | 0 | 0 | 0 |
| Ccdc88c       | 2 | 0 | 0 | 0 |
| AK010878      | 1 | 0 | 0 | 0 |
| Serpina3c     | 1 | 0 | 0 | 0 |
| Ankrd9        | 5 | 0 | 0 | 0 |
| Bag5          | 1 | 0 | 0 | 0 |
| 5033406O09Rik | 7 | 0 | 0 | 0 |
| Gm16844       | 1 | 0 | 0 | 0 |
| XLOC_006541   | 2 | 0 | 0 | 0 |
| XLOC_006569   | 1 | 0 | 0 | 0 |
| XLOC_006585   | 1 | 0 | 0 | 0 |
| AK018309      | 1 | 0 | 0 | 0 |
| XLOC_006603   | 1 | 0 | 0 | 0 |
| AK132630      | 1 | 0 | 0 | 0 |
| 2410018L13Rik | 1 | 0 | 0 | 0 |
| XLOC_006625   | 1 | 0 | 0 | 0 |
| XLOC_006669   | 2 | 0 | 0 | 0 |
| XLOC_006690   | 1 | 0 | 0 | 0 |
| XLOC_006710   | 1 | 0 | 0 | 0 |
| XLOC_006718   | 2 | 0 | 0 | 0 |
| XLOC_006720   | 1 | 0 | 0 | 0 |
| XLOC_006721   | 2 | 0 | 0 | 0 |
| XLOC_006734   | 1 | 0 | 0 | 0 |
| XLOC_006742   | 1 | 0 | 0 | 0 |



|               |   |   |   |   |
|---------------|---|---|---|---|
| Rad51l1       | 3 | 0 | 0 | 0 |
| Gstz1         | 3 | 0 | 0 | 0 |
| XLOC_006801   | 1 | 0 | 0 | 0 |
| XLOC_006816   | 1 | 0 | 0 | 0 |
| XLOC_006822   | 3 | 0 | 0 | 0 |
| XLOC_006835   | 1 | 0 | 0 | 0 |
| XLOC_006842   | 8 | 0 | 0 | 0 |
| XLOC_006843   | 1 | 0 | 0 | 0 |
| XLOC_006844   | 1 | 0 | 0 | 0 |
| XLOC_006852   | 3 | 0 | 0 | 0 |
| Tnfaip2       | 2 | 0 | 0 | 0 |
| XLOC_006895   | 1 | 0 | 0 | 0 |
| XLOC_006901   | 1 | 0 | 0 | 0 |
| Gen1          | 2 | 0 | 0 | 0 |
| XLOC_006948   | 1 | 0 | 0 | 0 |
| XLOC_006951   | 1 | 0 | 0 | 0 |
| AK016682      | 5 | 0 | 0 | 0 |
| C79407        | 2 | 0 | 0 | 0 |
| Slc8a3        | 4 | 0 | 0 | 0 |
| 2610021K21Rik | 4 | 0 | 0 | 0 |
| XLOC_007168   | 1 | 0 | 0 | 0 |
| Clmn          | 1 | 0 | 0 | 0 |
| XLOC_007199   | 1 | 0 | 0 | 0 |
| mKIAA1124     | 1 | 0 | 0 | 0 |
| BC031503      | 3 | 0 | 0 | 0 |
| AK149188      | 2 | 0 | 0 | 0 |
| Gm4983        | 1 | 0 | 0 | 0 |
| XLOC_006614   | 1 | 0 | 0 | 0 |
| Npas3         | 1 | 0 | 0 | 0 |
| Plekhg3       | 3 | 0 | 0 | 0 |
| Arg2          | 1 | 0 | 0 | 0 |
| XLOC_006783   | 3 | 0 | 0 | 0 |
| Batf          | 1 | 0 | 0 | 0 |
| 2310044G17Rik | 1 | 0 | 0 | 0 |
| XLOC_006818   | 2 | 0 | 0 | 0 |
| XLOC_006853   | 1 | 0 | 0 | 0 |
| XLOC_006868   | 2 | 0 | 0 | 0 |
| XLOC_006871   | 1 | 0 | 0 | 0 |
| XLOC_006939   | 2 | 0 | 0 | 0 |
| Acp1          | 2 | 0 | 0 | 0 |
| Dus4l         | 2 | 0 | 0 | 0 |
| XLOC_007105   | 2 | 0 | 0 | 0 |
| Prox2         | 2 | 0 | 0 | 0 |
| XLOC_007164   | 2 | 0 | 0 | 0 |
| XLOC_007213   | 2 | 0 | 0 | 0 |
| XLOC_007229   | 1 | 0 | 0 | 0 |
| XLOC_006557   | 1 | 0 | 0 | 0 |

|               |   |   |   |   |
|---------------|---|---|---|---|
| EG245297      | 1 | 0 | 0 | 0 |
| Asap2         | 1 | 0 | 0 | 0 |
| Imp2l         | 1 | 0 | 0 | 0 |
| XLOC_006664   | 1 | 0 | 0 | 0 |
| Akap5         | 1 | 0 | 0 | 0 |
| XLOC_006745   | 1 | 0 | 0 | 0 |
| XLOC_006839   | 1 | 0 | 0 | 0 |
| XLOC_006864   | 1 | 0 | 0 | 0 |
| XLOC_006875   | 1 | 0 | 0 | 0 |
| 1700030C10Rik | 1 | 0 | 0 | 0 |
| XLOC_006966   | 2 | 0 | 0 | 0 |
| AK015004      | 1 | 0 | 0 | 0 |
| Degs2         | 2 | 0 | 0 | 0 |
| Igh-A (1g2)   | 1 | 0 | 0 | 0 |
| XLOC_006537   | 1 | 0 | 0 | 0 |
| BC068281      | 3 | 0 | 0 | 0 |
| Gm10479       | 1 | 0 | 0 | 0 |
| 2410016O06Rik | 1 | 0 | 0 | 0 |
| XLOC_006980   | 1 | 0 | 0 | 0 |
| Tpo           | 1 | 0 | 0 | 0 |
| XLOC_007075   | 1 | 0 | 0 | 0 |
| 2810429I04Rik | 2 | 0 | 0 | 0 |
| Gdi2          | 3 | 0 | 0 | 0 |
| Asb13         | 4 | 0 | 0 | 0 |
| Akr1c19       | 3 | 0 | 0 | 0 |
| Klf6          | 1 | 0 | 0 | 0 |
| Pitrm1        | 2 | 0 | 0 | 0 |
| XLOC_008072   | 3 | 0 | 0 | 0 |
| Dip2c         | 6 | 0 | 0 | 0 |
| Ero1lb        | 3 | 0 | 0 | 0 |
| Nid1          | 2 | 0 | 0 | 0 |
| Lyst          | 5 | 0 | 0 | 0 |
| Gng4          | 3 | 0 | 0 | 0 |
| B3galnt2      | 2 | 0 | 0 | 0 |
| Arid4b        | 7 | 0 | 0 | 0 |
| Psma2         | 7 | 0 | 0 | 0 |
| AW209491      | 3 | 0 | 0 | 0 |
| Vps41         | 8 | 0 | 0 | 0 |
| Sfrp4         | 4 | 0 | 0 | 0 |
| Elmo1         | 7 | 0 | 0 | 0 |
| Aoah          | 5 | 0 | 0 | 0 |
| Trim27        | 3 | 0 | 0 | 0 |
| Zkscan4       | 1 | 0 | 0 | 0 |
| Gm11274       | 2 | 0 | 0 | 0 |
| Hist1h2bc     | 4 | 0 | 0 | 0 |
| Tdp2          | 1 | 0 | 0 | 0 |
| D130043K22Rik | 5 | 0 | 0 | 0 |

|               |   |   |   |   |
|---------------|---|---|---|---|
| Dcdc2a        | 1 | 0 | 0 | 0 |
| Gm11361       | 1 | 0 | 0 | 0 |
| AK020728      | 7 | 0 | 0 | 0 |
| Agtr1a        | 2 | 0 | 0 | 0 |
| Dusp22        | 2 | 0 | 0 | 0 |
| Foxf2         | 1 | 0 | 0 | 0 |
| XLOC_008128   | 6 | 0 | 0 | 0 |
| Wrnip1        | 3 | 0 | 0 | 0 |
| Serpinb1b     | 1 | 0 | 0 | 0 |
| Psmg4         | 2 | 0 | 0 | 0 |
| Prpf4b        | 7 | 0 | 0 | 0 |
| Cdyl          | 2 | 0 | 0 | 0 |
| Fars2         | 3 | 0 | 0 | 0 |
| XLOC_008139   | 2 | 0 | 0 | 0 |
| Ly86          | 1 | 0 | 0 | 0 |
| Riok1         | 2 | 0 | 0 | 0 |
| Snrnp48       | 2 | 0 | 0 | 0 |
| Bmp6          | 1 | 0 | 0 | 0 |
| Gm6245        | 1 | 0 | 0 | 0 |
| Gcnt2         | 2 | 0 | 0 | 0 |
| Pak1ip1       | 5 | 0 | 0 | 0 |
| BC024659      | 2 | 0 | 0 | 0 |
| Tmem170b      | 1 | 0 | 0 | 0 |
| Gm10790       | 3 | 0 | 0 | 0 |
| Phactr1       | 4 | 0 | 0 | 0 |
| Nol7          | 3 | 0 | 0 | 0 |
| AK038993      | 4 | 0 | 0 | 0 |
| Cd83          | 3 | 0 | 0 | 0 |
| Mylip         | 1 | 0 | 0 | 0 |
| Gmpr          | 4 | 0 | 0 | 0 |
| 5033430I15Rik | 2 | 0 | 0 | 0 |
| XLOC_008173   | 1 | 0 | 0 | 0 |
| Cap2          | 1 | 0 | 0 | 0 |
| C78339        | 1 | 0 | 0 | 0 |
| Kdm1b         | 4 | 0 | 0 | 0 |
| Rnf144b       | 6 | 0 | 0 | 0 |
| Id4           | 1 | 0 | 0 | 0 |
| A830005F24Rik | 1 | 0 | 0 | 0 |
| C030044B11Rik | 1 | 0 | 0 | 0 |
| Ninj1         | 2 | 0 | 0 | 0 |
| Tes3-ps       | 1 | 0 | 0 | 0 |
| Ecm2          | 2 | 0 | 0 | 0 |
| Ogn           | 1 | 0 | 0 | 0 |
| Nol8          | 4 | 0 | 0 | 0 |
| Fbxw17        | 4 | 0 | 0 | 0 |
| Spin1         | 4 | 0 | 0 | 0 |
| Nxn12         | 4 | 0 | 0 | 0 |

|               |   |   |   |   |
|---------------|---|---|---|---|
| Secisbp2      | 1 | 0 | 0 | 0 |
| Gadd45g       | 3 | 0 | 0 | 0 |
| Sfxn1         | 5 | 0 | 0 | 0 |
| Cplx2         | 3 | 0 | 0 | 0 |
| Arl10         | 3 | 0 | 0 | 0 |
| Higd2a        | 1 | 0 | 0 | 0 |
| Faf2          | 1 | 0 | 0 | 0 |
| Tspan17       | 9 | 0 | 0 | 0 |
| Unc5a         | 3 | 0 | 0 | 0 |
| Zfp346        | 6 | 0 | 0 | 0 |
| Nsd1          | 2 | 0 | 0 | 0 |
| Grk6          | 1 | 0 | 0 | 0 |
| B4galt7       | 3 | 0 | 0 | 0 |
| Caml          | 2 | 0 | 0 | 0 |
| Ddx46         | 4 | 0 | 0 | 0 |
| B230219D22Rik | 1 | 0 | 0 | 0 |
| Txndc15       | 1 | 0 | 0 | 0 |
| Pcbd2         | 3 | 0 | 0 | 0 |
| Catsper3      | 2 | 0 | 0 | 0 |
| Fbxl21        | 5 | 0 | 0 | 0 |
| Tgfbi         | 4 | 0 | 0 | 0 |
| Smad5         | 4 | 0 | 0 | 0 |
| 5133401N09Rik | 2 | 0 | 0 | 0 |
| Ntrk2         | 7 | 0 | 0 | 0 |
| Naa35         | 4 | 0 | 0 | 0 |
| Dapk1         | 5 | 0 | 0 | 0 |
| XLOC_008247   | 3 | 0 | 0 | 0 |
| XLOC_008251   | 2 | 0 | 0 | 0 |
| apo           | 1 | 0 | 0 | 0 |
| 0610007P08Rik | 7 | 0 | 0 | 0 |
| Habp4         | 2 | 0 | 0 | 0 |
| Cdk20         | 3 | 0 | 0 | 0 |
| Ptdss1        | 2 | 0 | 0 | 0 |
| Zfp759        | 2 | 0 | 0 | 0 |
| Zfp493        | 3 | 0 | 0 | 0 |
| BC100427      | 5 | 0 | 0 | 0 |
| Fastkd3       | 5 | 0 | 0 | 0 |
| 1700001L19Rik | 6 | 0 | 0 | 0 |
| Nsun2         | 2 | 0 | 0 | 0 |
| Lpcat1        | 5 | 0 | 0 | 0 |
| Clptm1l       | 2 | 0 | 0 | 0 |
| Slc12a7       | 3 | 0 | 0 | 0 |
| Brd9          | 5 | 0 | 0 | 0 |
| Tppp          | 4 | 0 | 0 | 0 |
| Slc9a3        | 4 | 0 | 0 | 0 |
| Ccdc127       | 1 | 0 | 0 | 0 |
| Erap1         | 1 | 0 | 0 | 0 |

|               |   |   |   |   |
|---------------|---|---|---|---|
| Pcsk1         | 3 | 0 | 0 | 0 |
| Eli2          | 3 | 0 | 0 | 0 |
| Glrx          | 1 | 0 | 0 | 0 |
| Ttc37         | 5 | 0 | 0 | 0 |
| XLOC_008300   | 1 | 0 | 0 | 0 |
| Mctp1         | 5 | 0 | 0 | 0 |
| 2210408I21Rik | 5 | 0 | 0 | 0 |
| Fam172a       | 7 | 0 | 0 | 0 |
| AK044036      | 2 | 0 | 0 | 0 |
| Arrdc3        | 3 | 0 | 0 | 0 |
| 9330111N05Rik | 1 | 0 | 0 | 0 |
| Mblac2        | 2 | 0 | 0 | 0 |
| Cetn3         | 4 | 0 | 0 | 0 |
| Mef2c         | 8 | 0 | 0 | 0 |
| 2810049E08Rik | 2 | 0 | 0 | 0 |
| Tmem161b      | 8 | 0 | 0 | 0 |
| Ccnh          | 2 | 0 | 0 | 0 |
| Edil3         | 7 | 0 | 0 | 0 |
| Tmem167       | 1 | 0 | 0 | 0 |
| Dhfr          | 1 | 0 | 0 | 0 |
| Ankrd34b      | 4 | 0 | 0 | 0 |
| Serinc5       | 5 | 0 | 0 | 0 |
| Mtx3          | 2 | 0 | 0 | 0 |
| Homer1        | 2 | 0 | 0 | 0 |
| Arsb          | 2 | 0 | 0 | 0 |
| Lhfpl2        | 5 | 0 | 0 | 0 |
| Tbca          | 6 | 0 | 0 | 0 |
| Zbed3         | 3 | 0 | 0 | 0 |
| F2rl2         | 2 | 0 | 0 | 0 |
| Poc5          | 1 | 0 | 0 | 0 |
| Col4a3bp      | 3 | 0 | 0 | 0 |
| Fam169a       | 2 | 0 | 0 | 0 |
| Gfm2          | 5 | 0 | 0 | 0 |
| Enc1          | 1 | 0 | 0 | 0 |
| XLOC_008345   | 4 | 0 | 0 | 0 |
| Ankra2        | 3 | 0 | 0 | 0 |
| Gm9828        | 4 | 0 | 0 | 0 |
| XLOC_008350   | 4 | 0 | 0 | 0 |
| Mrps27        | 2 | 0 | 0 | 0 |
| Serf1         | 1 | 0 | 0 | 0 |
| Smn1          | 2 | 0 | 0 | 0 |
| Taf9          | 6 | 0 | 0 | 0 |
| XLOC_008359   | 1 | 0 | 0 | 0 |
| Sgtb          | 2 | 0 | 0 | 0 |
| Trim23        | 2 | 0 | 0 | 0 |
| Cenpk         | 1 | 0 | 0 | 0 |
| Adamts6       | 2 | 0 | 0 | 0 |

|               |    |   |   |   |
|---------------|----|---|---|---|
| Srek1ip1      | 1  | 0 | 0 | 0 |
| Htr1a         | 1  | 0 | 0 | 0 |
| Dimt1         | 6  | 0 | 0 | 0 |
| 3830408C21Rik | 11 | 0 | 0 | 0 |
| 2810008M24Rik | 3  | 0 | 0 | 0 |
| Elovl7        | 7  | 0 | 0 | 0 |
| Pde4d         | 5  | 0 | 0 | 0 |
| Plk2          | 1  | 0 | 0 | 0 |
| Mier3         | 5  | 0 | 0 | 0 |
| Ankrd55       | 4  | 0 | 0 | 0 |
| Il6st         | 5  | 0 | 0 | 0 |
| Ppap2a        | 4  | 0 | 0 | 0 |
| Dhx29         | 1  | 0 | 0 | 0 |
| Ccno          | 2  | 0 | 0 | 0 |
| Esm1          | 1  | 0 | 0 | 0 |
| BC067074      | 3  | 0 | 0 | 0 |
| Arl15         | 4  | 0 | 0 | 0 |
| Mocs2         | 5  | 0 | 0 | 0 |
| Emb           | 4  | 0 | 0 | 0 |
| Hcn1          | 4  | 0 | 0 | 0 |
| Paip1         | 4  | 0 | 0 | 0 |
| 4833420G17Rik | 3  | 0 | 0 | 0 |
| Gm7120        | 3  | 0 | 0 | 0 |
| XLOC_008407   | 1  | 0 | 0 | 0 |
| Net1          | 5  | 0 | 0 | 0 |
| Akr1e1        | 3  | 0 | 0 | 0 |
| Pfkp          | 5  | 0 | 0 | 0 |
| Wdr37         | 5  | 0 | 0 | 0 |
| Zmynd11       | 9  | 0 | 0 | 0 |
| Mtr           | 4  | 0 | 0 | 0 |
| Lgals8        | 6  | 0 | 0 | 0 |
| Gpr137b-ps    | 2  | 0 | 0 | 0 |
| Gpr137b       | 4  | 0 | 0 | 0 |
| Hecw1         | 5  | 0 | 0 | 0 |
| Mrpl32        | 1  | 0 | 0 | 0 |
| Cdk13         | 5  | 0 | 0 | 0 |
| Rala          | 4  | 0 | 0 | 0 |
| Stard3nl      | 2  | 0 | 0 | 0 |
| Epdr1         | 2  | 0 | 0 | 0 |
| Zkscan3       | 3  | 0 | 0 | 0 |
| Pgbd1         | 4  | 0 | 0 | 0 |
| Nkapl         | 1  | 0 | 0 | 0 |
| Zfp389        | 2  | 0 | 0 | 0 |
| Zfp192        | 3  | 0 | 0 | 0 |
| Zfp322a       | 5  | 0 | 0 | 0 |
| Abt1          | 1  | 0 | 0 | 0 |
| Hist1h2be     | 2  | 0 | 0 | 0 |

|               |    |   |   |   |
|---------------|----|---|---|---|
| Hfe           | 2  | 0 | 0 | 0 |
| Scgn          | 3  | 0 | 0 | 0 |
| Lrrc16a       | 7  | 0 | 0 | 0 |
| Gmnn          | 2  | 0 | 0 | 0 |
| Mrs2          | 2  | 0 | 0 | 0 |
| Nrsn1         | 5  | 0 | 0 | 0 |
| XLOC_008472   | 8  | 0 | 0 | 0 |
| XLOC_008473   | 4  | 0 | 0 | 0 |
| E2f3          | 5  | 0 | 0 | 0 |
| Uqcrfs1       | 1  | 0 | 0 | 0 |
| Exoc2         | 3  | 0 | 0 | 0 |
| Serpinb6a     | 13 | 0 | 0 | 0 |
| Tubb2a        | 6  | 0 | 0 | 0 |
| Tubb2b        | 3  | 0 | 0 | 0 |
| Slc22a23      | 2  | 0 | 0 | 0 |
| 1300014I06Rik | 3  | 0 | 0 | 0 |
| Peci          | 8  | 0 | 0 | 0 |
| Rpp40         | 2  | 0 | 0 | 0 |
| Lym4          | 2  | 0 | 0 | 0 |
| Nrn1          | 4  | 0 | 0 | 0 |
| F13a1         | 1  | 0 | 0 | 0 |
| Ssr1          | 3  | 0 | 0 | 0 |
| Cage1         | 1  | 0 | 0 | 0 |
| Txndc5        | 4  | 0 | 0 | 0 |
| Muted         | 1  | 0 | 0 | 0 |
| Eef1e1        | 1  | 0 | 0 | 0 |
| Slc35b3       | 9  | 0 | 0 | 0 |
| Tcfap2a       | 4  | 0 | 0 | 0 |
| AK043285      | 3  | 0 | 0 | 0 |
| Elovl2        | 2  | 0 | 0 | 0 |
| Nedd9         | 2  | 0 | 0 | 0 |
| Tbc1d7        | 2  | 0 | 0 | 0 |
| Gfod1         | 2  | 0 | 0 | 0 |
| Ranbp9        | 3  | 0 | 0 | 0 |
| Ccdc90a       | 3  | 0 | 0 | 0 |
| Dtnbp1        | 4  | 0 | 0 | 0 |
| Nup153        | 2  | 0 | 0 | 0 |
| Kif13a        | 7  | 0 | 0 | 0 |
| Nhlrc1        | 1  | 0 | 0 | 0 |
| Dek           | 3  | 0 | 0 | 0 |
| Zfp169        | 4  | 0 | 0 | 0 |
| Ptpdc1        | 8  | 0 | 0 | 0 |
| Phf2          | 2  | 0 | 0 | 0 |
| Fam120a       | 4  | 0 | 0 | 0 |
| Wnk2          | 6  | 0 | 0 | 0 |
| 1110007C09Rik | 5  | 0 | 0 | 0 |
| Susd3         | 3  | 0 | 0 | 0 |

|               |    |   |   |   |
|---------------|----|---|---|---|
| Shc3          | 5  | 0 | 0 | 0 |
| Sema4d        | 6  | 0 | 0 | 0 |
| Diras2        | 2  | 0 | 0 | 0 |
| Auh           | 8  | 0 | 0 | 0 |
| Nfil3         | 4  | 0 | 0 | 0 |
| Ror2          | 7  | 0 | 0 | 0 |
| Sptlc1        | 3  | 0 | 0 | 0 |
| Thoc3         | 1  | 0 | 0 | 0 |
| XLOC_008555   | 1  | 0 | 0 | 0 |
| 4833439L19Rik | 9  | 0 | 0 | 0 |
| Nop16         | 3  | 0 | 0 | 0 |
| Cltb          | 5  | 0 | 0 | 0 |
| Rnf44         | 15 | 0 | 0 | 0 |
| Gprin1        | 5  | 0 | 0 | 0 |
| Rab24         | 3  | 0 | 0 | 0 |
| Lman2         | 1  | 0 | 0 | 0 |
| Dbn1          | 4  | 0 | 0 | 0 |
| Fam193b       | 8  | 0 | 0 | 0 |
| H2afy         | 4  | 0 | 0 | 0 |
| Tifab         | 4  | 0 | 0 | 0 |
| Cxcl14        | 2  | 0 | 0 | 0 |
| Trp7          | 6  | 0 | 0 | 0 |
| Trpc7         | 2  | 0 | 0 | 0 |
| Spock1        | 6  | 0 | 0 | 0 |
| Hnrnpa0       | 1  | 0 | 0 | 0 |
| Ubqln1        | 3  | 0 | 0 | 0 |
| 2210016F16Rik | 1  | 0 | 0 | 0 |
| Hnrnpk        | 8  | 0 | 0 | 0 |
| XLOC_008588   | 2  | 0 | 0 | 0 |
| Zcchc6        | 7  | 0 | 0 | 0 |
| Zfp935        | 1  | 0 | 0 | 0 |
| XLOC_008605   | 2  | 0 | 0 | 0 |
| Fbp2          | 1  | 0 | 0 | 0 |
| Fbp1          | 4  | 0 | 0 | 0 |
| XLOC_008607   | 1  | 0 | 0 | 0 |
| XLOC_008608   | 1  | 0 | 0 | 0 |
| Ptch1         | 6  | 0 | 0 | 0 |
| Zfp367        | 4  | 0 | 0 | 0 |
| Cdc14b        | 5  | 0 | 0 | 0 |
| 1110018J18Rik | 1  | 0 | 0 | 0 |
| Ctsl          | 3  | 0 | 0 | 0 |
| Hiatl1        | 2  | 0 | 0 | 0 |
| Mterfd1       | 1  | 0 | 0 | 0 |
| Zfp85-rs1     | 1  | 0 | 0 | 0 |
| Mtrr          | 4  | 0 | 0 | 0 |
| Adcy2         | 6  | 0 | 0 | 0 |
| Ube2ql1       | 2  | 0 | 0 | 0 |



|          |   |   |   |   |
|----------|---|---|---|---|
| BC018507 | 5 | 0 | 0 | 0 |
| Adamts16 | 6 | 0 | 0 | 0 |
| Ndufs6   | 3 | 0 | 0 | 0 |
| Slc6a19  | 1 | 0 | 0 | 0 |
| Trip13   | 4 | 0 | 0 | 0 |
| Gm6263   | 1 | 0 | 0 | 0 |
| Cep72    | 2 | 0 | 0 | 0 |
| Exoc3    | 4 | 0 | 0 | 0 |
| Pdcd6    | 2 | 0 | 0 | 0 |
| Sdha     | 3 | 0 | 0 | 0 |
| Zfp72    | 3 | 0 | 0 | 0 |
| Cast     | 6 | 0 | 0 | 0 |
| Rhobtb3  | 3 | 0 | 0 | 0 |
| Gm15528  | 1 | 0 | 0 | 0 |
| Rfesd    | 5 | 0 | 0 | 0 |
| Arsk     | 5 | 0 | 0 | 0 |
| Ankrd32  | 5 | 0 | 0 | 0 |
| Nr2f1    | 4 | 0 | 0 | 0 |
| Polr3g   | 2 | 0 | 0 | 0 |
| Rasa1    | 6 | 0 | 0 | 0 |
| Cox7c    | 4 | 0 | 0 | 0 |
| Atp6ap1l | 4 | 0 | 0 | 0 |
| Atg10    | 5 | 0 | 0 | 0 |
| Zcchc9   | 2 | 0 | 0 | 0 |
| Rasgrf2  | 7 | 0 | 0 | 0 |
| Msh3     | 8 | 0 | 0 | 0 |
| Fam151b  | 2 | 0 | 0 | 0 |
| Zfyve16  | 3 | 0 | 0 | 0 |
| Papd4    | 8 | 0 | 0 | 0 |
| Jmy      | 2 | 0 | 0 | 0 |
| Scamp1   | 3 | 0 | 0 | 0 |
| Pde8b    | 7 | 0 | 0 | 0 |
| Aggf1    | 2 | 0 | 0 | 0 |
| F2rl1    | 2 | 0 | 0 | 0 |
| F2r      | 1 | 0 | 0 | 0 |
| Sv2c     | 6 | 0 | 0 | 0 |
| Hmgcr    | 5 | 0 | 0 | 0 |
| Gm6169   | 1 | 0 | 0 | 0 |
| Nsa2     | 3 | 0 | 0 | 0 |
| Hexb     | 3 | 0 | 0 | 0 |
| Utp15    | 3 | 0 | 0 | 0 |
| Btf3     | 6 | 0 | 0 | 0 |
| Fcho2    | 4 | 0 | 0 | 0 |
| Tnpo1    | 7 | 0 | 0 | 0 |
| Ptcd2    | 4 | 0 | 0 | 0 |
| Mtap1b   | 3 | 0 | 0 | 0 |
| Bdp1     | 7 | 0 | 0 | 0 |

|               |   |   |   |   |
|---------------|---|---|---|---|
| Naip1         | 1 | 0 | 0 | 0 |
| Gtf2h2        | 3 | 0 | 0 | 0 |
| Ocln          | 1 | 0 | 0 | 0 |
| Marveld2      | 5 | 0 | 0 | 0 |
| Rad17         | 4 | 0 | 0 | 0 |
| Cdk7          | 1 | 0 | 0 | 0 |
| Cenph         | 1 | 0 | 0 | 0 |
| Pik3r1        | 7 | 0 | 0 | 0 |
| XLOC_008740   | 3 | 0 | 0 | 0 |
| Mast4         | 8 | 0 | 0 | 0 |
| Srsf12        | 5 | 0 | 0 | 0 |
| Erb2ip        | 7 | 0 | 0 | 0 |
| Nln           | 4 | 0 | 0 | 0 |
| 2410002O22Rik | 5 | 0 | 0 | 0 |
| Ppwd1         | 2 | 0 | 0 | 0 |
| Cwc27         | 2 | 0 | 0 | 0 |
| Rgs7bp        | 9 | 0 | 0 | 0 |
| Rnf180        | 6 | 0 | 0 | 0 |
| Ipo11         | 4 | 0 | 0 | 0 |
| Kif2a         | 6 | 0 | 0 | 0 |
| Zswim6        | 2 | 0 | 0 | 0 |
| Rab3c         | 4 | 0 | 0 | 0 |
| Gm5455        | 1 | 0 | 0 | 0 |
| Gpbp1         | 8 | 0 | 0 | 0 |
| Map3k1        | 7 | 0 | 0 | 0 |
| Il31ra        | 7 | 0 | 0 | 0 |
| Skiv2l2       | 5 | 0 | 0 | 0 |
| Gpx8          | 2 | 0 | 0 | 0 |
| Snx18         | 4 | 0 | 0 | 0 |
| Itga2         | 6 | 0 | 0 | 0 |
| Pelo          | 1 | 0 | 0 | 0 |
| Isl1          | 5 | 0 | 0 | 0 |
| Mrps30        | 3 | 0 | 0 | 0 |
| Heatr1        | 4 | 0 | 0 | 0 |
| 2810021B07Rik | 3 | 0 | 0 | 0 |
| XLOC_008097   | 3 | 0 | 0 | 0 |
| Hist1h1d      | 1 | 0 | 0 | 0 |
| Trim38        | 1 | 0 | 0 | 0 |
| Gpld1         | 2 | 0 | 0 | 0 |
| Sirt5         | 4 | 0 | 0 | 0 |
| Ippk          | 2 | 0 | 0 | 0 |
| Aspn          | 2 | 0 | 0 | 0 |
| S1pr3         | 4 | 0 | 0 | 0 |
| Cdhr2         | 1 | 0 | 0 | 0 |
| Rgs14         | 2 | 0 | 0 | 0 |
| XLOC_008237   | 2 | 0 | 0 | 0 |
| AK015814      | 6 | 0 | 0 | 0 |

|               |   |   |   |   |
|---------------|---|---|---|---|
| Rmi1          | 3 | 0 | 0 | 0 |
| Etohd2        | 1 | 0 | 0 | 0 |
| 2010111I01Rik | 3 | 0 | 0 | 0 |
| Gm16133       | 5 | 0 | 0 | 0 |
| AK021377      | 2 | 0 | 0 | 0 |
| XLOC_008269   | 2 | 0 | 0 | 0 |
| Med10         | 2 | 0 | 0 | 0 |
| XLOC_008292   | 5 | 0 | 0 | 0 |
| Lysmd3        | 4 | 0 | 0 | 0 |
| Ssbp2         | 7 | 0 | 0 | 0 |
| Wdr41         | 3 | 0 | 0 | 0 |
| XLOC_008354   | 4 | 0 | 0 | 0 |
| XLOC_008384   | 1 | 0 | 0 | 0 |
| Slc38a9       | 2 | 0 | 0 | 0 |
| XLOC_008393   | 1 | 0 | 0 | 0 |
| XLOC_008398   | 2 | 0 | 0 | 0 |
| BC016423      | 5 | 0 | 0 | 0 |
| Tbce          | 3 | 0 | 0 | 0 |
| 5033411D12Rik | 5 | 0 | 0 | 0 |
| AK038969      | 2 | 0 | 0 | 0 |
| Zfp187        | 9 | 0 | 0 | 0 |
| Aldh5a1       | 2 | 0 | 0 | 0 |
| Gmds          | 2 | 0 | 0 | 0 |
| XLOC_008517   | 1 | 0 | 0 | 0 |
| XLOC_008527   | 2 | 0 | 0 | 0 |
| Cenpp         | 2 | 0 | 0 | 0 |
| Gm15440       | 1 | 0 | 0 | 0 |
| XLOC_008553   | 1 | 0 | 0 | 0 |
| Hk3           | 6 | 0 | 0 | 0 |
| Ddx41         | 5 | 0 | 0 | 0 |
| XLOC_008578   | 3 | 0 | 0 | 0 |
| Golm1         | 1 | 0 | 0 | 0 |
| Gm3604        | 2 | 0 | 0 | 0 |
| 6720489N17Rik | 3 | 0 | 0 | 0 |
| XLOC_008604   | 3 | 0 | 0 | 0 |
| BC064714      | 1 | 0 | 0 | 0 |
| Uqcrb         | 2 | 0 | 0 | 0 |
| BC038328      | 1 | 0 | 0 | 0 |
| XLOC_008623   | 2 | 0 | 0 | 0 |
| Zfp874b       | 4 | 0 | 0 | 0 |
| Papd7         | 3 | 0 | 0 | 0 |
| Zfp825        | 1 | 0 | 0 | 0 |
| XLOC_008662   | 1 | 0 | 0 | 0 |
| XLOC_008664   | 1 | 0 | 0 | 0 |
| AK082072      | 1 | 0 | 0 | 0 |
| Vcan          | 1 | 0 | 0 | 0 |
| Cmya5         | 1 | 0 | 0 | 0 |

|               |   |   |   |   |
|---------------|---|---|---|---|
| Bhmt2         | 1 | 0 | 0 | 0 |
| Rgnf          | 6 | 0 | 0 | 0 |
| Cartpt        | 5 | 0 | 0 | 0 |
| Itga1         | 4 | 0 | 0 | 0 |
| Pelota        | 1 | 0 | 0 | 0 |
| Akr1c13       | 2 | 0 | 0 | 0 |
| XLOC_008076   | 2 | 0 | 0 | 0 |
| Fam65b        | 5 | 0 | 0 | 0 |
| AK053225      | 1 | 0 | 0 | 0 |
| AK030238      | 3 | 0 | 0 | 0 |
| Hrh2          | 2 | 0 | 0 | 0 |
| XLOC_008243   | 2 | 0 | 0 | 0 |
| XLOC_008248   | 1 | 0 | 0 | 0 |
| XLOC_008259   | 1 | 0 | 0 | 0 |
| Mrpl36        | 2 | 0 | 0 | 0 |
| XLOC_008282   | 1 | 0 | 0 | 0 |
| XLOC_008306   | 1 | 0 | 0 | 0 |
| XLOC_008360   | 1 | 0 | 0 | 0 |
| Depdc1b       | 1 | 0 | 0 | 0 |
| XLOC_008392   | 2 | 0 | 0 | 0 |
| AK016040      | 1 | 0 | 0 | 0 |
| XLOC_008402   | 1 | 0 | 0 | 0 |
| Ggps1         | 3 | 0 | 0 | 0 |
| AK085253      | 1 | 0 | 0 | 0 |
| Pou6f2        | 2 | 0 | 0 | 0 |
| C230035I16Rik | 1 | 0 | 0 | 0 |
| XLOC_008492   | 1 | 0 | 0 | 0 |
| 4931429P17Rik | 1 | 0 | 0 | 0 |
| AK039372      | 1 | 0 | 0 | 0 |
| Isca1         | 1 | 0 | 0 | 0 |
| Fancc         | 5 | 0 | 0 | 0 |
| Rsl1          | 3 | 0 | 0 | 0 |
| Zfp874a       | 1 | 0 | 0 | 0 |
| XLOC_008661   | 5 | 0 | 0 | 0 |
| Gpr150        | 1 | 0 | 0 | 0 |
| 4833422C13Rik | 2 | 0 | 0 | 0 |
| Thbs4         | 1 | 0 | 0 | 0 |
| XLOC_008705   | 1 | 0 | 0 | 0 |
| Polk          | 5 | 0 | 0 | 0 |
| XLOC_008721   | 1 | 0 | 0 | 0 |
| Mrps36        | 1 | 0 | 0 | 0 |
| Slc30a5       | 5 | 0 | 0 | 0 |
| XLOC_008066   | 1 | 0 | 0 | 0 |
| TTRAP         | 1 | 0 | 0 | 0 |
| XLOC_008129   | 1 | 0 | 0 | 0 |
| XLOC_008140   | 2 | 0 | 0 | 0 |
| Omd           | 1 | 0 | 0 | 0 |

|               |   |   |   |   |
|---------------|---|---|---|---|
| Cks2          | 1 | 0 | 0 | 0 |
| XLOC_008204   | 1 | 0 | 0 | 0 |
| XLOC_008209   | 1 | 0 | 0 | 0 |
| 4732471D19Rik | 1 | 0 | 0 | 0 |
| XLOC_008214   | 1 | 0 | 0 | 0 |
| AK043531      | 2 | 0 | 0 | 0 |
| Zfp455        | 3 | 0 | 0 | 0 |
| XLOC_008276   | 2 | 0 | 0 | 0 |
| Cd180         | 2 | 0 | 0 | 0 |
| Ercc8         | 2 | 0 | 0 | 0 |
| XLOC_008373   | 2 | 0 | 0 | 0 |
| XLOC_008400   | 1 | 0 | 0 | 0 |
| AK090209      | 2 | 0 | 0 | 0 |
| XLOC_008518   | 1 | 0 | 0 | 0 |
| XLOC_008582   | 1 | 0 | 0 | 0 |
| Kif27         | 1 | 0 | 0 | 0 |
| XLOC_008599   | 1 | 0 | 0 | 0 |
| Zfp934        | 2 | 0 | 0 | 0 |
| AK139826      | 2 | 0 | 0 | 0 |
| Zfp953        | 1 | 0 | 0 | 0 |
| Srd5a1        | 2 | 0 | 0 | 0 |
| AK053270      | 1 | 0 | 0 | 0 |
| Ndufaf2       | 1 | 0 | 0 | 0 |
| XLOC_008059   | 1 | 0 | 0 | 0 |
| XLOC_008087   | 2 | 0 | 0 | 0 |
| XLOC_008119   | 1 | 0 | 0 | 0 |
| Bphl          | 1 | 0 | 0 | 0 |
| XLOC_008151   | 1 | 0 | 0 | 0 |
| Edn1          | 1 | 0 | 0 | 0 |
| XLOC_008186   | 1 | 0 | 0 | 0 |
| Prelid1       | 1 | 0 | 0 | 0 |
| XLOC_008255   | 1 | 0 | 0 | 0 |
| AK002708      | 2 | 0 | 0 | 0 |
| AK034282      | 1 | 0 | 0 | 0 |
| Fgd3          | 3 | 0 | 0 | 0 |
| XLOC_008543   | 1 | 0 | 0 | 0 |
| Mxd3          | 1 | 0 | 0 | 0 |
| AK045807      | 1 | 0 | 0 | 0 |
| A530054K11Rik | 1 | 0 | 0 | 0 |
| XLOC_008086   | 1 | 0 | 0 | 0 |
| XLOC_008130   | 1 | 0 | 0 | 0 |
| Gm8619        | 1 | 0 | 0 | 0 |
| AK017337      | 1 | 0 | 0 | 0 |
| XLOC_008307   | 1 | 0 | 0 | 0 |
| XLOC_008399   | 1 | 0 | 0 | 0 |
| XLOC_008403   | 1 | 0 | 0 | 0 |
| XLOC_008412   | 1 | 0 | 0 | 0 |

|               |    |   |   |   |
|---------------|----|---|---|---|
| XLOC_008413   | 2  | 0 | 0 | 0 |
| Acot13        | 1  | 0 | 0 | 0 |
| AK039480      | 1  | 0 | 0 | 0 |
| A530095I07Rik | 1  | 0 | 0 | 0 |
| XLOC_008773   | 1  | 0 | 0 | 0 |
| Gm17048       | 1  | 0 | 0 | 0 |
| Gm17128       | 1  | 0 | 0 | 0 |
| Gm5456        | 1  | 0 | 0 | 0 |
| Gm17121       | 1  | 0 | 0 | 0 |
| Gm8396        | 1  | 0 | 0 | 0 |
| Flnb          | 8  | 0 | 0 | 0 |
| Abhd6         | 3  | 0 | 0 | 0 |
| Rpp14         | 2  | 0 | 0 | 0 |
| Kctd6         | 6  | 0 | 0 | 0 |
| Ptprg         | 3  | 0 | 0 | 0 |
| 3830406C13Rik | 8  | 0 | 0 | 0 |
| Gm5457        | 1  | 0 | 0 | 0 |
| Atxn7         | 6  | 0 | 0 | 0 |
| Il3ra         | 9  | 0 | 0 | 0 |
| Slc4a7        | 5  | 0 | 0 | 0 |
| AK080648      | 5  | 0 | 0 | 0 |
| XLOC_009555   | 1  | 0 | 0 | 0 |
| Ngly1         | 2  | 0 | 0 | 0 |
| Top2b         | 7  | 0 | 0 | 0 |
| Thrb          | 7  | 0 | 0 | 0 |
| Nkiras1       | 1  | 0 | 0 | 0 |
| Nid2          | 4  | 0 | 0 | 0 |
| Nudt13        | 5  | 0 | 0 | 0 |
| XLOC_009563   | 1  | 0 | 0 | 0 |
| Fam149b       | 5  | 0 | 0 | 0 |
| 2310021P13Rik | 8  | 0 | 0 | 0 |
| Plau          | 3  | 0 | 0 | 0 |
| Vcl           | 5  | 0 | 0 | 0 |
| Adk           | 4  | 0 | 0 | 0 |
| Myst4         | 10 | 0 | 0 | 0 |
| Samd8         | 4  | 0 | 0 | 0 |
| Vdac2         | 5  | 0 | 0 | 0 |
| Rps24         | 9  | 0 | 0 | 0 |
| Ppif          | 3  | 0 | 0 | 0 |
| Anxa11        | 4  | 0 | 0 | 0 |
| Fam116a       | 6  | 0 | 0 | 0 |
| Arf4          | 1  | 0 | 0 | 0 |
| Il17rd        | 3  | 0 | 0 | 0 |
| Erc2          | 14 | 0 | 0 | 0 |
| Wnt5a         | 6  | 0 | 0 | 0 |
| Selk          | 3  | 0 | 0 | 0 |
| Actr8         | 3  | 0 | 0 | 0 |

|               |   |   |   |   |
|---------------|---|---|---|---|
| Chdh          | 3 | 0 | 0 | 0 |
| Dcp1a         | 3 | 0 | 0 | 0 |
| Tkt           | 7 | 0 | 0 | 0 |
| Rft1          | 3 | 0 | 0 | 0 |
| Sfmbt1        | 4 | 0 | 0 | 0 |
| Mustn1        | 1 | 0 | 0 | 0 |
| XLOC_009601   | 1 | 0 | 0 | 0 |
| Nek4          | 5 | 0 | 0 | 0 |
| Glt8d1        | 3 | 0 | 0 | 0 |
| Pbrm1         | 6 | 0 | 0 | 0 |
| Nt5dc2        | 2 | 0 | 0 | 0 |
| Tnnc1         | 8 | 0 | 0 | 0 |
| Sema3g        | 2 | 0 | 0 | 0 |
| Bap1          | 3 | 0 | 0 | 0 |
| Capn7         | 2 | 0 | 0 | 0 |
| Eaf1          | 1 | 0 | 0 | 0 |
| Btd           | 3 | 0 | 0 | 0 |
| D830044D21Rik | 1 | 0 | 0 | 0 |
| Oxnad1        | 1 | 0 | 0 | 0 |
| Parg          | 3 | 0 | 0 | 0 |
| Ogdhl         | 5 | 0 | 0 | 0 |
| Prrx1         | 5 | 0 | 0 | 0 |
| 1810011H11Rik | 3 | 0 | 0 | 0 |
| E130203B14Rik | 2 | 0 | 0 | 0 |
| Arhgap22      | 7 | 0 | 0 | 0 |
| Glud1         | 3 | 0 | 0 | 0 |
| XLOC_009629   | 2 | 0 | 0 | 0 |
| XLOC_009631   | 1 | 0 | 0 | 0 |
| Wapal         | 3 | 0 | 0 | 0 |
| Grid1         | 5 | 0 | 0 | 0 |
| Gm5057        | 2 | 0 | 0 | 0 |
| XLOC_009637   | 1 | 0 | 0 | 0 |
| Gpr137c       | 1 | 0 | 0 | 0 |
| Psmc6         | 2 | 0 | 0 | 0 |
| Styx          | 1 | 0 | 0 | 0 |
| Gm6580        | 1 | 0 | 0 | 0 |
| Socs4         | 3 | 0 | 0 | 0 |
| Mapk1ip1l     | 1 | 0 | 0 | 0 |
| Ktn1          | 9 | 0 | 0 | 0 |
| Peli2         | 3 | 0 | 0 | 0 |
| 6720456H20Rik | 6 | 0 | 0 | 0 |
| Mudeng        | 2 | 0 | 0 | 0 |
| Naa30         | 1 | 0 | 0 | 0 |
| Parp2         | 3 | 0 | 0 | 0 |
| Apex1         | 2 | 0 | 0 | 0 |
| Pnp           | 5 | 0 | 0 | 0 |
| Pnp2          | 1 | 0 | 0 | 0 |

|               |   |   |   |   |
|---------------|---|---|---|---|
| Rnase4        | 5 | 0 | 0 | 0 |
| Mett11d1      | 8 | 0 | 0 | 0 |
| Slc39a2       | 4 | 0 | 0 | 0 |
| Arhgef40      | 9 | 0 | 0 | 0 |
| Rpgrip1       | 1 | 0 | 0 | 0 |
| Tox4          | 3 | 0 | 0 | 0 |
| Tcra          | 4 | 0 | 0 | 0 |
| Abhd4         | 1 | 0 | 0 | 0 |
| Oxa1l         | 2 | 0 | 0 | 0 |
| Mrpl52        | 2 | 0 | 0 | 0 |
| Lrp10         | 4 | 0 | 0 | 0 |
| Rem2          | 1 | 0 | 0 | 0 |
| Pabpn1        | 8 | 0 | 0 | 0 |
| Cmtm5         | 7 | 0 | 0 | 0 |
| Ngdn          | 5 | 0 | 0 | 0 |
| Dhrs2         | 2 | 0 | 0 | 0 |
| Pck2          | 3 | 0 | 0 | 0 |
| Psme1         | 3 | 0 | 0 | 0 |
| Rnf31         | 4 | 0 | 0 | 0 |
| Rec8          | 7 | 0 | 0 | 0 |
| Gmpr2         | 1 | 0 | 0 | 0 |
| 2610027L16Rik | 1 | 0 | 0 | 0 |
| Nynrin        | 3 | 0 | 0 | 0 |
| Khynyn        | 1 | 0 | 0 | 0 |
| Rnf17         | 3 | 0 | 0 | 0 |
| Parp4         | 4 | 0 | 0 | 0 |
| Mphosph8      | 3 | 0 | 0 | 0 |
| Zmym2         | 2 | 0 | 0 | 0 |
| Ift88         | 3 | 0 | 0 | 0 |
| Mrp63         | 2 | 0 | 0 | 0 |
| Fgf9          | 7 | 0 | 0 | 0 |
| Rcbtb1        | 5 | 0 | 0 | 0 |
| Cab39l        | 4 | 0 | 0 | 0 |
| Shisa2        | 1 | 0 | 0 | 0 |
| Mtmr6         | 4 | 0 | 0 | 0 |
| Fam123a       | 1 | 0 | 0 | 0 |
| Spata13       | 5 | 0 | 0 | 0 |
| Mipep         | 2 | 0 | 0 | 0 |
| Arl11         | 1 | 0 | 0 | 0 |
| Trim13        | 2 | 0 | 0 | 0 |
| Rnaseh2b      | 4 | 0 | 0 | 0 |
| AK200207      | 2 | 0 | 0 | 0 |
| Wdfy2         | 7 | 0 | 0 | 0 |
| Defb42        | 2 | 0 | 0 | 0 |
| Ctsb          | 5 | 0 | 0 | 0 |
| Fam167a       | 4 | 0 | 0 | 0 |
| Xkr6          | 3 | 0 | 0 | 0 |



|               |   |   |   |   |
|---------------|---|---|---|---|
| Pinx1         | 3 | 0 | 0 | 0 |
| AK044422      | 2 | 0 | 0 | 0 |
| Kif13b        | 7 | 0 | 0 | 0 |
| Ints9         | 1 | 0 | 0 | 0 |
| Fbxo16        | 5 | 0 | 0 | 0 |
| Ccdc25        | 2 | 0 | 0 | 0 |
| Trim35        | 3 | 0 | 0 | 0 |
| Adra1a        | 1 | 0 | 0 | 0 |
| Pnma2         | 3 | 0 | 0 | 0 |
| Kctd9         | 4 | 0 | 0 | 0 |
| Entpd4        | 5 | 0 | 0 | 0 |
| AK133329      | 5 | 0 | 0 | 0 |
| Bin3          | 2 | 0 | 0 | 0 |
| Phyhip        | 3 | 0 | 0 | 0 |
| Lgi3          | 4 | 0 | 0 | 0 |
| Reep4         | 2 | 0 | 0 | 0 |
| Hr            | 2 | 0 | 0 | 0 |
| Nudt18        | 3 | 0 | 0 | 0 |
| Dok2          | 4 | 0 | 0 | 0 |
| XLOC_009792   | 4 | 0 | 0 | 0 |
| Gfra2         | 6 | 0 | 0 | 0 |
| Rcbtb2        | 5 | 0 | 0 | 0 |
| Sucla2        | 1 | 0 | 0 | 0 |
| Htr2a         | 1 | 0 | 0 | 0 |
| Esd           | 6 | 0 | 0 | 0 |
| Lcp1          | 3 | 0 | 0 | 0 |
| Zc3h13        | 6 | 0 | 0 | 0 |
| Siah3         | 1 | 0 | 0 | 0 |
| XLOC_009810   | 1 | 0 | 0 | 0 |
| Nufip1        | 1 | 0 | 0 | 0 |
| Enox1         | 9 | 0 | 0 | 0 |
| Mtrf1         | 1 | 0 | 0 | 0 |
| Kbtbd7        | 1 | 0 | 0 | 0 |
| Elf1          | 3 | 0 | 0 | 0 |
| Sugt1         | 3 | 0 | 0 | 0 |
| Pcdh17        | 2 | 0 | 0 | 0 |
| Tdrd3         | 9 | 0 | 0 | 0 |
| 6720463M24Rik | 5 | 0 | 0 | 0 |
| Pibf1         | 3 | 0 | 0 | 0 |
| Klf5          | 3 | 0 | 0 | 0 |
| Uchl3         | 7 | 0 | 0 | 0 |
| Cln5          | 1 | 0 | 0 | 0 |
| AK079958      | 1 | 0 | 0 | 0 |
| Slain1        | 2 | 0 | 0 | 0 |
| AK043219      | 1 | 0 | 0 | 0 |
| D130009I18Rik | 5 | 0 | 0 | 0 |
| Ndfip2        | 5 | 0 | 0 | 0 |

|               |    |   |   |   |
|---------------|----|---|---|---|
| FJ744746      | 8  | 0 | 0 | 0 |
| XLOC_009849   | 1  | 0 | 0 | 0 |
| Slitrk5       | 3  | 0 | 0 | 0 |
| Tpm3-rs7      | 1  | 0 | 0 | 0 |
| Mir17hg       | 1  | 0 | 0 | 0 |
| Gpc5          | 4  | 0 | 0 | 0 |
| Gpr180        | 3  | 0 | 0 | 0 |
| Dnajc3        | 2  | 0 | 0 | 0 |
| Rap2a         | 1  | 0 | 0 | 0 |
| Ipo5          | 2  | 0 | 0 | 0 |
| XLOC_009865   | 4  | 0 | 0 | 0 |
| Ubac2         | 1  | 0 | 0 | 0 |
| Tm9sf2        | 6  | 0 | 0 | 0 |
| Clybl         | 2  | 0 | 0 | 0 |
| Pcca          | 1  | 0 | 0 | 0 |
| Dnase1l3      | 2  | 0 | 0 | 0 |
| Pdhb          | 2  | 0 | 0 | 0 |
| Fam107a       | 3  | 0 | 0 | 0 |
| 4930452B06Rik | 4  | 0 | 0 | 0 |
| Fhit          | 10 | 0 | 0 | 0 |
| Cadps         | 13 | 0 | 0 | 0 |
| Thoc7         | 7  | 0 | 0 | 0 |
| Psmc6         | 2  | 0 | 0 | 0 |
| Lrrc3b        | 6  | 0 | 0 | 0 |
| Rarb          | 1  | 0 | 0 | 0 |
| XLOC_009893   | 2  | 0 | 0 | 0 |
| Ube2e1        | 1  | 0 | 0 | 0 |
| Ube2e2        | 2  | 0 | 0 | 0 |
| 2700060E02Rik | 4  | 0 | 0 | 0 |
| 1810063B07Rik | 2  | 0 | 0 | 0 |
| Kcnk16        | 4  | 0 | 0 | 0 |
| Ecd           | 1  | 0 | 0 | 0 |
| Dnajc9        | 2  | 0 | 0 | 0 |
| Mrps16        | 4  | 0 | 0 | 0 |
| Ttc18         | 7  | 0 | 0 | 0 |
| Anxa7         | 5  | 0 | 0 | 0 |
| Ppp3cb        | 7  | 0 | 0 | 0 |
| Ndst2         | 8  | 0 | 0 | 0 |
| Camk2g        | 11 | 0 | 0 | 0 |
| Ap3m1         | 8  | 0 | 0 | 0 |
| Comtd1        | 2  | 0 | 0 | 0 |
| Zfp503        | 2  | 0 | 0 | 0 |
| Kcnma1        | 9  | 0 | 0 | 0 |
| Dlg5          | 6  | 0 | 0 | 0 |
| Polr3a        | 2  | 0 | 0 | 0 |
| Zcchc24       | 4  | 0 | 0 | 0 |
| D14Ert449e    | 4  | 0 | 0 | 0 |

|               |    |   |   |   |
|---------------|----|---|---|---|
| Plac9         | 1  | 0 | 0 | 0 |
| Simap         | 8  | 0 | 0 | 0 |
| Pde12         | 1  | 0 | 0 | 0 |
| Appl1         | 5  | 0 | 0 | 0 |
| Ccdc66        | 4  | 0 | 0 | 0 |
| Cacna2d3      | 6  | 0 | 0 | 0 |
| Cacna1d       | 11 | 0 | 0 | 0 |
| Prkcd         | 4  | 0 | 0 | 0 |
| Spcs1         | 1  | 0 | 0 | 0 |
| Gnl3          | 3  | 0 | 0 | 0 |
| 2010107H07Rik | 4  | 0 | 0 | 0 |
| Dnahc1        | 4  | 0 | 0 | 0 |
| Sh3bp5        | 2  | 0 | 0 | 0 |
| Hacl1         | 4  | 0 | 0 | 0 |
| Ankrd28       | 6  | 0 | 0 | 0 |
| Dph3          | 2  | 0 | 0 | 0 |
| Wdfy4         | 7  | 0 | 0 | 0 |
| Mapk8         | 3  | 0 | 0 | 0 |
| Sncg          | 2  | 0 | 0 | 0 |
| Bmpr1a        | 4  | 0 | 0 | 0 |
| Ldb3          | 6  | 0 | 0 | 0 |
| Opn4          | 3  | 0 | 0 | 0 |
| Gcap14        | 7  | 0 | 0 | 0 |
| Cdhr1         | 3  | 0 | 0 | 0 |
| Ghitm         | 4  | 0 | 0 | 0 |
| Tspan14       | 7  | 0 | 0 | 0 |
| 5730469M10Rik | 4  | 0 | 0 | 0 |
| Dydc2         | 3  | 0 | 0 | 0 |
| Ptgdr         | 1  | 0 | 0 | 0 |
| Txndc16       | 7  | 0 | 0 | 0 |
| Ero1l         | 3  | 0 | 0 | 0 |
| Fermt2        | 4  | 0 | 0 | 0 |
| XLOC_009985   | 1  | 0 | 0 | 0 |
| Gmfb          | 4  | 0 | 0 | 0 |
| Gch1          | 2  | 0 | 0 | 0 |
| Dlgap5        | 1  | 0 | 0 | 0 |
| Atg14         | 4  | 0 | 0 | 0 |
| XLOC_009998   | 1  | 0 | 0 | 0 |
| Gm6055        | 1  | 0 | 0 | 0 |
| Slc35f4       | 7  | 0 | 0 | 0 |
| 3632451O06Rik | 8  | 0 | 0 | 0 |
| Ttc5          | 5  | 0 | 0 | 0 |
| Tep1          | 4  | 0 | 0 | 0 |
| Klhl33        | 3  | 0 | 0 | 0 |
| Osgep         | 3  | 0 | 0 | 0 |
| Ndrp2         | 13 | 0 | 0 | 0 |
| Hnrnp35       | 7  | 0 | 0 | 0 |

|               |    |   |   |   |
|---------------|----|---|---|---|
| Rab2b         | 2  | 0 | 0 | 0 |
| Mettl3        | 1  | 0 | 0 | 0 |
| Sall2         | 4  | 0 | 0 | 0 |
| Dad1          | 1  | 0 | 0 | 0 |
| Slc7a7        | 2  | 0 | 0 | 0 |
| Prmt5         | 5  | 0 | 0 | 0 |
| Haus4         | 4  | 0 | 0 | 0 |
| Jub           | 4  | 0 | 0 | 0 |
| 4931414P19Rik | 4  | 0 | 0 | 0 |
| Psmb5         | 2  | 0 | 0 | 0 |
| Cdh24         | 8  | 0 | 0 | 0 |
| Acin1         | 8  | 0 | 0 | 0 |
| Cebpe         | 2  | 0 | 0 | 0 |
| Slc7a8        | 6  | 0 | 0 | 0 |
| Homez         | 1  | 0 | 0 | 0 |
| Ppp1r3e       | 1  | 0 | 0 | 0 |
| Slc22a17      | 7  | 0 | 0 | 0 |
| Efs           | 1  | 0 | 0 | 0 |
| Zfhx2         | 5  | 0 | 0 | 0 |
| Jph4          | 1  | 0 | 0 | 0 |
| Fam158a       | 1  | 0 | 0 | 0 |
| Ipo4          | 5  | 0 | 0 | 0 |
| Mdp1          | 2  | 0 | 0 | 0 |
| Nedd8         | 5  | 0 | 0 | 0 |
| Rabggta       | 4  | 0 | 0 | 0 |
| Dhrs1         | 6  | 0 | 0 | 0 |
| Sdr39u1       | 4  | 0 | 0 | 0 |
| Ube2j2        | 6  | 0 | 0 | 0 |
| Cenpj         | 3  | 0 | 0 | 0 |
| Pspc1         | 4  | 0 | 0 | 0 |
| Zmym5         | 12 | 0 | 0 | 0 |
| Gjb2          | 1  | 0 | 0 | 0 |
| Cryl1         | 2  | 0 | 0 | 0 |
| N6amt2        | 2  | 0 | 0 | 0 |
| Xpo4          | 7  | 0 | 0 | 0 |
| Lats2         | 5  | 0 | 0 | 0 |
| F630043A04Rik | 1  | 0 | 0 | 0 |
| Zdhhc20       | 6  | 0 | 0 | 0 |
| Efha1         | 1  | 0 | 0 | 0 |
| Phf11         | 1  | 0 | 0 | 0 |
| Gm4902        | 2  | 0 | 0 | 0 |
| Cdad1         | 2  | 0 | 0 | 0 |
| Atp8a2        | 7  | 0 | 0 | 0 |
| Nupl1         | 1  | 0 | 0 | 0 |
| Tnfrsf19      | 3  | 0 | 0 | 0 |
| Ebpl          | 1  | 0 | 0 | 0 |
| Kpna3         | 4  | 0 | 0 | 0 |

|               |    |   |   |   |
|---------------|----|---|---|---|
| 6330409N04Rik | 3  | 0 | 0 | 0 |
| Ints6         | 7  | 0 | 0 | 0 |
| Fdft1         | 4  | 0 | 0 | 0 |
| Neil2         | 6  | 0 | 0 | 0 |
| Msra          | 7  | 0 | 0 | 0 |
| Hmbox1        | 8  | 0 | 0 | 0 |
| Extl3         | 9  | 0 | 0 | 0 |
| Pnoc          | 2  | 0 | 0 | 0 |
| Elp3          | 2  | 0 | 0 | 0 |
| Scara3        | 2  | 0 | 0 | 0 |
| Ephx2         | 3  | 0 | 0 | 0 |
| Ptk2b         | 4  | 0 | 0 | 0 |
| Dpysl2        | 4  | 0 | 0 | 0 |
| Ppp2r2d       | 10 | 0 | 0 | 0 |
| Ppp2r2a       | 1  | 0 | 0 | 0 |
| Cdca2         | 1  | 0 | 0 | 0 |
| Dock5         | 4  | 0 | 0 | 0 |
| Slc25a37      | 5  | 0 | 0 | 0 |
| R3hcc1        | 3  | 0 | 0 | 0 |
| Chmp7         | 3  | 0 | 0 | 0 |
| Rhobtb2       | 6  | 0 | 0 | 0 |
| 2610301G19Rik | 5  | 0 | 0 | 0 |
| 9930012K11Rik | 4  | 0 | 0 | 0 |
| Pdlim2        | 4  | 0 | 0 | 0 |
| Sorbs3        | 5  | 0 | 0 | 0 |
| Ppp3cc        | 3  | 0 | 0 | 0 |
| Slc39a14      | 7  | 0 | 0 | 0 |
| Piwil2        | 2  | 0 | 0 | 0 |
| Polr3d        | 3  | 0 | 0 | 0 |
| Bmp1          | 4  | 0 | 0 | 0 |
| Fam160b2      | 10 | 0 | 0 | 0 |
| Epb4.9        | 11 | 0 | 0 | 0 |
| Npm2          | 2  | 0 | 0 | 0 |
| Xpo7          | 4  | 0 | 0 | 0 |
| Fndc3a        | 8  | 0 | 0 | 0 |
| Rb1           | 3  | 0 | 0 | 0 |
| Itm2b         | 1  | 0 | 0 | 0 |
| Lrch1         | 4  | 0 | 0 | 0 |
| Cog3          | 5  | 0 | 0 | 0 |
| Slc25a30      | 3  | 0 | 0 | 0 |
| 1200011I18Rik | 1  | 0 | 0 | 0 |
| Serp2         | 5  | 0 | 0 | 0 |
| 9030625A04Rik | 4  | 0 | 0 | 0 |
| Dnajc15       | 6  | 0 | 0 | 0 |
| Akap11        | 7  | 0 | 0 | 0 |
| Dgkh          | 6  | 0 | 0 | 0 |
| 1190002H23Rik | 3  | 0 | 0 | 0 |

|             |    |   |   |   |
|-------------|----|---|---|---|
| Wbp4        | 3  | 0 | 0 | 0 |
| Lect1       | 5  | 0 | 0 | 0 |
| Pcdh8       | 2  | 0 | 0 | 0 |
| XLOC_010150 | 2  | 0 | 0 | 0 |
| Gm10119     | 1  | 0 | 0 | 0 |
| Pcdh9       | 7  | 0 | 0 | 0 |
| Dach1       | 6  | 0 | 0 | 0 |
| Mzt1        | 1  | 0 | 0 | 0 |
| Dis3        | 3  | 0 | 0 | 0 |
| Klf12       | 6  | 0 | 0 | 0 |
| Tbc1d4      | 9  | 0 | 0 | 0 |
| Commd6      | 2  | 0 | 0 | 0 |
| Fbxl3       | 7  | 0 | 0 | 0 |
| Mycbp2      | 12 | 0 | 0 | 0 |
| Ednrb       | 4  | 0 | 0 | 0 |
| Pou4f1      | 2  | 0 | 0 | 0 |
| Rbm26       | 7  | 0 | 0 | 0 |
| XLOC_010170 | 2  | 0 | 0 | 0 |
| Slitrk1     | 1  | 0 | 0 | 0 |
| XLOC_010177 | 6  | 0 | 0 | 0 |
| Abcc4       | 7  | 0 | 0 | 0 |
| Dzip1       | 12 | 0 | 0 | 0 |
| Uggt2       | 7  | 0 | 0 | 0 |
| XLOC_010184 | 2  | 0 | 0 | 0 |
| Stk24       | 5  | 0 | 0 | 0 |
| Slc15a1     | 1  | 0 | 0 | 0 |
| A2ld1       | 2  | 0 | 0 | 0 |
| Tmtc4       | 5  | 0 | 0 | 0 |
| XLOC_009550 | 1  | 0 | 0 | 0 |
| Chchd1      | 1  | 0 | 0 | 0 |
| XLOC_009576 | 1  | 0 | 0 | 0 |
| XLOC_009585 | 1  | 0 | 0 | 0 |
| Arhgef3     | 5  | 0 | 0 | 0 |
| XLOC_009610 | 1  | 0 | 0 | 0 |
| XLOC_009619 | 3  | 0 | 0 | 0 |
| Ptger2      | 2  | 0 | 0 | 0 |
| XLOC_009649 | 4  | 0 | 0 | 0 |
| Cgrrf1      | 2  | 0 | 0 | 0 |
| Tcrd        | 2  | 0 | 0 | 0 |
| Bcl2l2      | 1  | 0 | 0 | 0 |
| Lrrc16b     | 7  | 0 | 0 | 0 |
| XLOC_009739 | 1  | 0 | 0 | 0 |
| Serpine3    | 3  | 0 | 0 | 0 |
| Tnfrsf10b   | 2  | 0 | 0 | 0 |
| Egr3        | 2  | 0 | 0 | 0 |
| XLOC_009784 | 1  | 0 | 0 | 0 |
| XLOC_009794 | 1  | 0 | 0 | 0 |

|                  |   |   |   |   |
|------------------|---|---|---|---|
| 5031414D18Rik    | 2 | 0 | 0 | 0 |
| XLOC_009842      | 1 | 0 | 0 | 0 |
| AK166274         | 1 | 0 | 0 | 0 |
| XLOC_009851      | 3 | 0 | 0 | 0 |
| AK147121         | 6 | 0 | 0 | 0 |
| Zic2             | 2 | 0 | 0 | 0 |
| AK041589         | 4 | 0 | 0 | 0 |
| XLOC_009882      | 1 | 0 | 0 | 0 |
| Nr1d2            | 5 | 0 | 0 | 0 |
| Rpl15            | 2 | 0 | 0 | 0 |
| AK086741         | 2 | 0 | 0 | 0 |
| Il17rb           | 2 | 0 | 0 | 0 |
| Timm23           | 2 | 0 | 0 | 0 |
| Sh2d4b           | 6 | 0 | 0 | 0 |
| Ap1g2            | 5 | 0 | 0 | 0 |
| Tm9sf1           | 2 | 0 | 0 | 0 |
| Ripk3            | 3 | 0 | 0 | 0 |
| Dleu7            | 1 | 0 | 0 | 0 |
| Bnip3l           | 2 | 0 | 0 | 0 |
| AK086749         | 2 | 0 | 0 | 0 |
| Fgf17            | 1 | 0 | 0 | 0 |
| XLOC_010129      | 2 | 0 | 0 | 0 |
| Rnf219           | 1 | 0 | 0 | 0 |
| XLOC_010178      | 1 | 0 | 0 | 0 |
| XLOC_009546      | 1 | 0 | 0 | 0 |
| XLOC_009600      | 1 | 0 | 0 | 0 |
| Rpl23a-ps3       | 1 | 0 | 0 | 0 |
| XLOC_009667      | 1 | 0 | 0 | 0 |
| Rnase6           | 1 | 0 | 0 | 0 |
| Gm10364          | 1 | 0 | 0 | 0 |
| XLOC_009725      | 1 | 0 | 0 | 0 |
| Gm10094          | 2 | 0 | 0 | 0 |
| AK014273         | 2 | 0 | 0 | 0 |
| XLOC_009767      | 2 | 0 | 0 | 0 |
| Ebf2             | 2 | 0 | 0 | 0 |
| XLOC_009773      | 2 | 0 | 0 | 0 |
| XLOC_009799      | 2 | 0 | 0 | 0 |
| Zmynd17          | 4 | 0 | 0 | 0 |
| Itih3            | 7 | 0 | 0 | 0 |
| Nisch            | 4 | 0 | 0 | 0 |
| 3425401B19Rik    | 1 | 0 | 0 | 0 |
| XLOC_009992      | 1 | 0 | 0 | 0 |
| Psme2            | 3 | 0 | 0 | 0 |
| Adcy4            | 6 | 0 | 0 | 0 |
| Gjb6             | 2 | 0 | 0 | 0 |
| FGF-14C (FHF-4C) | 1 | 0 | 0 | 0 |
| Pxk              | 3 | 0 | 0 | 0 |

|               |   |   |   |   |
|---------------|---|---|---|---|
| XLOC_009634   | 5 | 0 | 0 | 0 |
| Trdv1         | 1 | 0 | 0 | 0 |
| XLOC_009723   | 2 | 0 | 0 | 0 |
| Kcnrg         | 1 | 0 | 0 | 0 |
| XLOC_009765   | 2 | 0 | 0 | 0 |
| XLOC_009802   | 2 | 0 | 0 | 0 |
| Tpt1          | 1 | 0 | 0 | 0 |
| XLOC_009813   | 1 | 0 | 0 | 0 |
| Hs6st3        | 2 | 0 | 0 | 0 |
| XLOC_009864   | 1 | 0 | 0 | 0 |
| XLOC_009903   | 1 | 0 | 0 | 0 |
| XLOC_009960   | 2 | 0 | 0 | 0 |
| XLOC_009988   | 3 | 0 | 0 | 0 |
| AK047857      | 1 | 0 | 0 | 0 |
| Duxbl         | 1 | 0 | 0 | 0 |
| Gdf10         | 1 | 0 | 0 | 0 |
| G630016D24Rik | 1 | 0 | 0 | 0 |
| C1qtnf9       | 1 | 0 | 0 | 0 |
| XLOC_009743   | 2 | 0 | 0 | 0 |
| Ccdc122       | 2 | 0 | 0 | 0 |
| Mettl6        | 1 | 0 | 0 | 0 |
| XLOC_009996   | 1 | 0 | 0 | 0 |
| D14Ert668e    | 1 | 0 | 0 | 0 |
| mKIAA4159     | 1 | 0 | 0 | 0 |
| Nudt15        | 1 | 0 | 0 | 0 |
| XLOC_010149   | 1 | 0 | 0 | 0 |
| Kctd12        | 1 | 0 | 0 | 0 |
| A330035P11Rik | 2 | 0 | 0 | 0 |
| XLOC_009578   | 1 | 0 | 0 | 0 |
| Ear2          | 1 | 0 | 0 | 0 |
| Gm17002       | 1 | 0 | 0 | 0 |
| XLOC_009686   | 1 | 0 | 0 | 0 |
| Pbk           | 1 | 0 | 0 | 0 |
| XLOC_009826   | 1 | 0 | 0 | 0 |
| Usp54         | 2 | 0 | 0 | 0 |
| XLOC_010078   | 1 | 0 | 0 | 0 |
| Esco2         | 1 | 0 | 0 | 0 |
| XLOC_010100   | 1 | 0 | 0 | 0 |
| Sepp1         | 1 | 0 | 0 | 0 |
| Oxct1         | 2 | 0 | 0 | 0 |
| Plcxd3        | 3 | 0 | 0 | 0 |
| Rpl37         | 2 | 0 | 0 | 0 |
| Prkaa1        | 3 | 0 | 0 | 0 |
| Ttc33         | 7 | 0 | 0 | 0 |
| Dab2          | 5 | 0 | 0 | 0 |
| Lifr          | 3 | 0 | 0 | 0 |
| XLOC_010943   | 1 | 0 | 0 | 0 |



|               |       |    |   |   |   |
|---------------|-------|----|---|---|---|
| XLOC_010944   |       | 1  | 0 | 0 | 0 |
| Nup155        |       | 3  | 0 | 0 | 0 |
| 2410089E03Rik |       | 17 | 0 | 0 | 0 |
| XLOC_010947   |       | 6  | 0 | 0 | 0 |
| Lmbrd2        |       | 3  | 0 | 0 | 0 |
| Rad1          |       | 3  | 0 | 0 | 0 |
| AK047938      |       | 1  | 0 | 0 | 0 |
| Amacr         |       | 1  | 0 | 0 | 0 |
| Zfr           |       | 5  | 0 | 0 | 0 |
| Mtmr12        |       | 4  | 0 | 0 | 0 |
| Golph3        |       | 2  | 0 | 0 | 0 |
| Drosha        |       | 7  | 0 | 0 | 0 |
| Cdh9          |       | 6  | 0 | 0 | 0 |
| XLOC_010965   |       | 2  | 0 | 0 | 0 |
| Cdh18         |       | 3  | 0 | 0 | 0 |
| Myo10         |       | 9  | 0 | 0 | 0 |
| Fam134b       |       | 4  | 0 | 0 | 0 |
| Zfp622        |       | 2  | 0 | 0 | 0 |
|               | 41709 | 7  | 0 | 0 | 0 |
| XLOC_010972   |       | 1  | 0 | 0 | 0 |
| XLOC_010973   |       | 3  | 0 | 0 | 0 |
| Ank           |       | 3  | 0 | 0 | 0 |
| XLOC_010975   |       | 3  | 0 | 0 | 0 |
| Ctnnd2        |       | 7  | 0 | 0 | 0 |
| Dap           |       | 3  | 0 | 0 | 0 |
| Cmb1          |       | 5  | 0 | 0 | 0 |
| Sema5a        |       | 3  | 0 | 0 | 0 |
| Sdc2          |       | 1  | 0 | 0 | 0 |
| Pgcp          |       | 2  | 0 | 0 | 0 |
| XLOC_010984   |       | 1  | 0 | 0 | 0 |
| Mtdh          |       | 5  | 0 | 0 | 0 |
| Laptm4b       |       | 4  | 0 | 0 | 0 |
| Matn2         |       | 4  | 0 | 0 | 0 |
| Pop1          |       | 1  | 0 | 0 | 0 |
| Kcns2         |       | 2  | 0 | 0 | 0 |
| Vps13b        |       | 4  | 0 | 0 | 0 |
| XLOC_010992   |       | 1  | 0 | 0 | 0 |
| XLOC_010993   |       | 4  | 0 | 0 | 0 |
| XLOC_010995   |       | 7  | 0 | 0 | 0 |
| XLOC_010997   |       | 1  | 0 | 0 | 0 |
| XLOC_010998   |       | 2  | 0 | 0 | 0 |
| Atp6v1c1      |       | 2  | 0 | 0 | 0 |
| Cthrc1        |       | 2  | 0 | 0 | 0 |
| Dcaf13        |       | 4  | 0 | 0 | 0 |
| XLOC_011007   |       | 6  | 0 | 0 | 0 |
| Ttc35         |       | 2  | 0 | 0 | 0 |
| Eny2          |       | 2  | 0 | 0 | 0 |

|               |    |   |   |   |
|---------------|----|---|---|---|
| Ebag9         | 3  | 0 | 0 | 0 |
| A930017M01Rik | 3  | 0 | 0 | 0 |
| XLOC_011019   | 2  | 0 | 0 | 0 |
| Utp23         | 1  | 0 | 0 | 0 |
| Aard          | 1  | 0 | 0 | 0 |
| Med30         | 3  | 0 | 0 | 0 |
| Nov           | 1  | 0 | 0 | 0 |
| Deptor        | 4  | 0 | 0 | 0 |
| Zhx2          | 4  | 0 | 0 | 0 |
| Wdyhv1        | 2  | 0 | 0 | 0 |
| D15Ert621e    | 4  | 0 | 0 | 0 |
| Trmt12        | 1  | 0 | 0 | 0 |
| Ndufb9        | 1  | 0 | 0 | 0 |
| Sqle          | 1  | 0 | 0 | 0 |
| Nsmce2        | 4  | 0 | 0 | 0 |
| Trib1         | 2  | 0 | 0 | 0 |
| Myc           | 4  | 0 | 0 | 0 |
| Efr3a         | 6  | 0 | 0 | 0 |
| Phf20l1       | 10 | 0 | 0 | 0 |
| Khdrbs3       | 7  | 0 | 0 | 0 |
| Gm3150        | 1  | 0 | 0 | 0 |
| XLOC_011060   | 1  | 0 | 0 | 0 |
| mKIAA0870     | 10 | 0 | 0 | 0 |
| Ptp4a3        | 5  | 0 | 0 | 0 |
| 4930572J05Rik | 2  | 0 | 0 | 0 |
| Ly6e          | 9  | 0 | 0 | 0 |
| Gpihbp1       | 3  | 0 | 0 | 0 |
| Zfp41         | 3  | 0 | 0 | 0 |
| AK084954      | 1  | 0 | 0 | 0 |
| Rhpn1         | 6  | 0 | 0 | 0 |
| XLOC_011075   | 1  | 0 | 0 | 0 |
| Gsdmd         | 7  | 0 | 0 | 0 |
| Zfp707        | 2  | 0 | 0 | 0 |
| Grina         | 4  | 0 | 0 | 0 |
| Gpaa1         | 4  | 0 | 0 | 0 |
| Cyc1          | 3  | 0 | 0 | 0 |
| Maf1          | 4  | 0 | 0 | 0 |
| XLOC_011089   | 8  | 0 | 0 | 0 |
| Brp16         | 6  | 0 | 0 | 0 |
| Heatr7a       | 5  | 0 | 0 | 0 |
| Hsf1          | 3  | 0 | 0 | 0 |
| Gpr172b       | 1  | 0 | 0 | 0 |
| Adck5         | 2  | 0 | 0 | 0 |
| Ppp1r16a      | 9  | 0 | 0 | 0 |
| Zfp7          | 3  | 0 | 0 | 0 |
| Comm5         | 2  | 0 | 0 | 0 |
| Rpl8          | 4  | 0 | 0 | 0 |

|               |   |   |   |   |
|---------------|---|---|---|---|
| 1110038F14Rik | 4 | 0 | 0 | 0 |
| XLOC_011105   | 6 | 0 | 0 | 0 |
| Apol9b        | 3 | 0 | 0 | 0 |
| XLOC_011108   | 1 | 0 | 0 | 0 |
| Ncf4          | 3 | 0 | 0 | 0 |
| Mpst          | 4 | 0 | 0 | 0 |
| Kctd17        | 4 | 0 | 0 | 0 |
| XLOC_011113   | 2 | 0 | 0 | 0 |
| Cdc42ep1      | 1 | 0 | 0 | 0 |
| Sh3bp1        | 4 | 0 | 0 | 0 |
| Pdxp          | 2 | 0 | 0 | 0 |
| Nol12         | 3 | 0 | 0 | 0 |
| H1f0          | 1 | 0 | 0 | 0 |
| Gcat          | 1 | 0 | 0 | 0 |
| Micall1       | 3 | 0 | 0 | 0 |
| Polr2f        | 1 | 0 | 0 | 0 |
| Pick1         | 4 | 0 | 0 | 0 |
| Cby1          | 4 | 0 | 0 | 0 |
| Gtpbp1        | 2 | 0 | 0 | 0 |
| Syng1         | 2 | 0 | 0 | 0 |
| Mgat3         | 3 | 0 | 0 | 0 |
| Atf4          | 2 | 0 | 0 | 0 |
| Fam83f        | 5 | 0 | 0 | 0 |
| XLOC_011148   | 2 | 0 | 0 | 0 |
| Adsl          | 1 | 0 | 0 | 0 |
| Sgsm3         | 3 | 0 | 0 | 0 |
| Rbx1          | 5 | 0 | 0 | 0 |
| XLOC_011155   | 1 | 0 | 0 | 0 |
| Ep300         | 4 | 0 | 0 | 0 |
| L3mbtl2       | 2 | 0 | 0 | 0 |
| Zc3h7b        | 3 | 0 | 0 | 0 |
| Xrcc6         | 1 | 0 | 0 | 0 |
| Mei1          | 2 | 0 | 0 | 0 |
| Ccdc134       | 4 | 0 | 0 | 0 |
| Srebf2        | 4 | 0 | 0 | 0 |
| 1500032L24Rik | 2 | 0 | 0 | 0 |
| AK080278      | 2 | 0 | 0 | 0 |
| Bik           | 1 | 0 | 0 | 0 |
| Tspo          | 2 | 0 | 0 | 0 |
| Samm50        | 5 | 0 | 0 | 0 |
| Parvb         | 6 | 0 | 0 | 0 |
| Nup50         | 3 | 0 | 0 | 0 |
| Fam118a       | 2 | 0 | 0 | 0 |
| Fbln1         | 5 | 0 | 0 | 0 |
| Atxn10        | 5 | 0 | 0 | 0 |
| XLOC_011188   | 1 | 0 | 0 | 0 |
| Ppara         | 4 | 0 | 0 | 0 |

|               |    |   |   |   |
|---------------|----|---|---|---|
| Ttc38         | 2  | 0 | 0 | 0 |
| Gtse1         | 1  | 0 | 0 | 0 |
| Trmu          | 4  | 0 | 0 | 0 |
| Gramd4        | 5  | 0 | 0 | 0 |
| Tbc1d22a      | 11 | 0 | 0 | 0 |
| Fam19a5       | 3  | 0 | 0 | 0 |
| Zbed4         | 1  | 0 | 0 | 0 |
| Creld2        | 1  | 0 | 0 | 0 |
| Panx2         | 3  | 0 | 0 | 0 |
| Trabd         | 3  | 0 | 0 | 0 |
| XLOC_011206   | 2  | 0 | 0 | 0 |
| 1300018J18Rik | 2  | 0 | 0 | 0 |
| Ncaph2        | 9  | 0 | 0 | 0 |
| Mapk8ip2      | 5  | 0 | 0 | 0 |
| AK082325      | 1  | 0 | 0 | 0 |
| Shank3        | 10 | 0 | 0 | 0 |
| Acr           | 2  | 0 | 0 | 0 |
| Alg10b        | 2  | 0 | 0 | 0 |
| Lrrk2         | 3  | 0 | 0 | 0 |
| Cntn1         | 5  | 0 | 0 | 0 |
| AK035742      | 4  | 0 | 0 | 0 |
| XLOC_011225   | 2  | 0 | 0 | 0 |
| Pphln1        | 9  | 0 | 0 | 0 |
| Irak4         | 2  | 0 | 0 | 0 |
| Tmem117       | 2  | 0 | 0 | 0 |
| Ano6          | 4  | 0 | 0 | 0 |
| Arid2         | 1  | 0 | 0 | 0 |
| Slc48a1       | 1  | 0 | 0 | 0 |
| Tmem106c      | 5  | 0 | 0 | 0 |
| Pfkm          | 3  | 0 | 0 | 0 |
| Cacnb3        | 3  | 0 | 0 | 0 |
| Prph          | 11 | 0 | 0 | 0 |
| Troap         | 2  | 0 | 0 | 0 |
| Dnajc22       | 5  | 0 | 0 | 0 |
| Spats2        | 5  | 0 | 0 | 0 |
| Tmbim6        | 5  | 0 | 0 | 0 |
| XLOC_011260   | 5  | 0 | 0 | 0 |
| Gpd1          | 3  | 0 | 0 | 0 |
| 2310016M24Rik | 1  | 0 | 0 | 0 |
| Larp4         | 6  | 0 | 0 | 0 |
| Dip2b         | 7  | 0 | 0 | 0 |
| Mettl7a1      | 3  | 0 | 0 | 0 |
| Gm10035       | 1  | 0 | 0 | 0 |
| Letmd1        | 2  | 0 | 0 | 0 |
| Dazap2        | 5  | 0 | 0 | 0 |
| Slc4a8        | 4  | 0 | 0 | 0 |
| Scn8a         | 3  | 0 | 0 | 0 |

|               |    |   |   |   |
|---------------|----|---|---|---|
| XLOC_011277   | 4  | 0 | 0 | 0 |
| Ankrd33       | 2  | 0 | 0 | 0 |
| Acvr1         | 3  | 0 | 0 | 0 |
| Acvr1b        | 1  | 0 | 0 | 0 |
| Grasp         | 3  | 0 | 0 | 0 |
| Nr4a1         | 5  | 0 | 0 | 0 |
| 9430023L20Rik | 2  | 0 | 0 | 0 |
| 6030408B16Rik | 2  | 0 | 0 | 0 |
| Eif4b         | 3  | 0 | 0 | 0 |
| Tenc1         | 7  | 0 | 0 | 0 |
| Igfbp6        | 2  | 0 | 0 | 0 |
| Mfsd5         | 2  | 0 | 0 | 0 |
| Espl1         | 5  | 0 | 0 | 0 |
| Myg1          | 3  | 0 | 0 | 0 |
| Sp1           | 3  | 0 | 0 | 0 |
| Amhr2         | 3  | 0 | 0 | 0 |
| Prr13         | 5  | 0 | 0 | 0 |
| XLOC_011296   | 3  | 0 | 0 | 0 |
| Pcbp2         | 5  | 0 | 0 | 0 |
| Tarbp2        | 5  | 0 | 0 | 0 |
| Hoxc11        | 3  | 0 | 0 | 0 |
| Hoxc10        | 2  | 0 | 0 | 0 |
| Hoxc9         | 5  | 0 | 0 | 0 |
| XLOC_011304   | 2  | 0 | 0 | 0 |
| Hoxc8         | 1  | 0 | 0 | 0 |
| Hoxc6         | 2  | 0 | 0 | 0 |
| Hnrnpa1       | 3  | 0 | 0 | 0 |
| Copz1         | 1  | 0 | 0 | 0 |
| Ghr           | 3  | 0 | 0 | 0 |
| AW549877      | 4  | 0 | 0 | 0 |
| Card6         | 3  | 0 | 0 | 0 |
| Ptger4        | 3  | 0 | 0 | 0 |
| Osmr          | 8  | 0 | 0 | 0 |
| Egflam        | 5  | 0 | 0 | 0 |
| Wdr70         | 5  | 0 | 0 | 0 |
| Slc1a3        | 2  | 0 | 0 | 0 |
| Dnajc21       | 4  | 0 | 0 | 0 |
| Brix1         | 1  | 0 | 0 | 0 |
| Rai14         | 5  | 0 | 0 | 0 |
| Tars          | 1  | 0 | 0 | 0 |
| Npr3          | 1  | 0 | 0 | 0 |
| Sub1          | 1  | 0 | 0 | 0 |
| Pdzd2         | 10 | 0 | 0 | 0 |
| 6030458C11Rik | 3  | 0 | 0 | 0 |
| Cdh6          | 4  | 0 | 0 | 0 |
| Acot10        | 1  | 0 | 0 | 0 |
| Basp1         | 1  | 0 | 0 | 0 |

|             |       |    |   |   |   |
|-------------|-------|----|---|---|---|
| Fbxl7       |       | 1  | 0 | 0 | 0 |
| XLOC_011346 |       | 1  | 0 | 0 | 0 |
| Fam105a     |       | 4  | 0 | 0 | 0 |
| Trio        |       | 14 | 0 | 0 | 0 |
| Ankrd33b    |       | 3  | 0 | 0 | 0 |
| Ropn1       |       | 3  | 0 | 0 | 0 |
|             | 41704 | 5  | 0 | 0 | 0 |
| Cct5        |       | 2  | 0 | 0 | 0 |
| AK007719    |       | 1  | 0 | 0 | 0 |
| Tspy15      |       | 1  | 0 | 0 | 0 |
| Rpl30       |       | 5  | 0 | 0 | 0 |
| Hrsp12      |       | 2  | 0 | 0 | 0 |
| Stk3        |       | 4  | 0 | 0 | 0 |
| Cox6c       |       | 1  | 0 | 0 | 0 |
| Rnf19a      |       | 3  | 0 | 0 | 0 |
| Ankrd46     |       | 5  | 0 | 0 | 0 |
| Pabpc1      |       | 4  | 0 | 0 | 0 |
| Ywhaz       |       | 6  | 0 | 0 | 0 |
| Zfp706      |       | 4  | 0 | 0 | 0 |
| Ncald       |       | 9  | 0 | 0 | 0 |
| Rrm2b       |       | 7  | 0 | 0 | 0 |
| Ubr5        |       | 7  | 0 | 0 | 0 |
| Klf10       |       | 4  | 0 | 0 | 0 |
| Azin1       |       | 2  | 0 | 0 | 0 |
| Slc25a32    |       | 2  | 0 | 0 | 0 |
| XLOC_011380 |       | 2  | 0 | 0 | 0 |
| Dpys        |       | 4  | 0 | 0 | 0 |
| Lrp12       |       | 2  | 0 | 0 | 0 |
| XLOC_011383 |       | 2  | 0 | 0 | 0 |
| Rspo2       |       | 9  | 0 | 0 | 0 |
| Tmem74      |       | 1  | 0 | 0 | 0 |
| Nudcd1      |       | 4  | 0 | 0 | 0 |
| Sybu        |       | 9  | 0 | 0 | 0 |
| Kcnv1       |       | 6  | 0 | 0 | 0 |
| Csmd3       |       | 9  | 0 | 0 | 0 |
| Eif3h       |       | 3  | 0 | 0 | 0 |
| Rad21       |       | 1  | 0 | 0 | 0 |
| Samd12      |       | 7  | 0 | 0 | 0 |
| Taf2        |       | 3  | 0 | 0 | 0 |
| Dsc1        |       | 2  | 0 | 0 | 0 |
| Mrpl13      |       | 6  | 0 | 0 | 0 |
| Sntb1       |       | 4  | 0 | 0 | 0 |
| Der1        |       | 4  | 0 | 0 | 0 |
| Zhx1        |       | 2  | 0 | 0 | 0 |
| Atad2       |       | 5  | 0 | 0 | 0 |
| Klhl38      |       | 2  | 0 | 0 | 0 |
| Tmem65      |       | 4  | 0 | 0 | 0 |

|               |    |   |   |   |
|---------------|----|---|---|---|
| Tatdn1        | 1  | 0 | 0 | 0 |
| Mtss1         | 2  | 0 | 0 | 0 |
| E430025E21Rik | 2  | 0 | 0 | 0 |
| Fam49b        | 7  | 0 | 0 | 0 |
| Asap1         | 14 | 0 | 0 | 0 |
| Adcy8         | 3  | 0 | 0 | 0 |
| Oc90          | 2  | 0 | 0 | 0 |
| Kcnq3         | 3  | 0 | 0 | 0 |
| Ndr1          | 6  | 0 | 0 | 0 |
| St3gal1       | 4  | 0 | 0 | 0 |
| XLOC_011435   | 4  | 0 | 0 | 0 |
| Col22a1       | 2  | 0 | 0 | 0 |
| Kcnk9         | 2  | 0 | 0 | 0 |
| Eif2c2        | 3  | 0 | 0 | 0 |
| Ptk2          | 11 | 0 | 0 | 0 |
| Slc45a4       | 7  | 0 | 0 | 0 |
| Gm7935        | 1  | 0 | 0 | 0 |
| Arc           | 3  | 0 | 0 | 0 |
| Jrk           | 1  | 0 | 0 | 0 |
| Lypd2         | 1  | 0 | 0 | 0 |
| 2300005B03Rik | 1  | 0 | 0 | 0 |
| Lynx1         | 3  | 0 | 0 | 0 |
| Ly6a          | 4  | 0 | 0 | 0 |
| Ly6c1         | 7  | 0 | 0 | 0 |
| Ly6h          | 5  | 0 | 0 | 0 |
| Top1mt        | 4  | 0 | 0 | 0 |
| Zc3h3         | 4  | 0 | 0 | 0 |
| Naprt1        | 9  | 0 | 0 | 0 |
| Eef1d         | 4  | 0 | 0 | 0 |
| Pycrl         | 4  | 0 | 0 | 0 |
| Tsta3         | 4  | 0 | 0 | 0 |
| 2410075B13Rik | 2  | 0 | 0 | 0 |
| Fam83h        | 3  | 0 | 0 | 0 |
| Scrib         | 10 | 0 | 0 | 0 |
| Puf60         | 7  | 0 | 0 | 0 |
| Nrbp2         | 10 | 0 | 0 | 0 |
| Plec          | 4  | 0 | 0 | 0 |
| Oplah         | 3  | 0 | 0 | 0 |
| Sharnin       | 3  | 0 | 0 | 0 |
| Bop1          | 6  | 0 | 0 | 0 |
| Scrt1         | 2  | 0 | 0 | 0 |
| Fbxl6         | 3  | 0 | 0 | 0 |
| Cpsf1         | 8  | 0 | 0 | 0 |
| Vps28         | 8  | 0 | 0 | 0 |
| Cyhr1         | 4  | 0 | 0 | 0 |
| Zfp251        | 5  | 0 | 0 | 0 |
| Zfp647        | 2  | 0 | 0 | 0 |

|               |   |   |   |   |
|---------------|---|---|---|---|
| Rbfox2        | 9 | 0 | 0 | 0 |
| Apol9a        | 5 | 0 | 0 | 0 |
| Myh9          | 7 | 0 | 0 | 0 |
| Txn2          | 2 | 0 | 0 | 0 |
| Eif3d         | 5 | 0 | 0 | 0 |
| Cacng2        | 3 | 0 | 0 | 0 |
| Csf2rb2       | 5 | 0 | 0 | 0 |
| Tst           | 1 | 0 | 0 | 0 |
| Tmprss6       | 6 | 0 | 0 | 0 |
| Il2rb         | 3 | 0 | 0 | 0 |
| C1qtnf6       | 4 | 0 | 0 | 0 |
| Rac2          | 1 | 0 | 0 | 0 |
| Elfn2         | 3 | 0 | 0 | 0 |
| Mfng          | 3 | 0 | 0 | 0 |
| Card10        | 5 | 0 | 0 | 0 |
| Ankrd54       | 3 | 0 | 0 | 0 |
| Sox10         | 6 | 0 | 0 | 0 |
| Pla2g6        | 8 | 0 | 0 | 0 |
| Tmem184b      | 5 | 0 | 0 | 0 |
| Csnk1e        | 3 | 0 | 0 | 0 |
| Kcnj4         | 3 | 0 | 0 | 0 |
| Ddx17         | 8 | 0 | 0 | 0 |
| Dmc1          | 2 | 0 | 0 | 0 |
| 4933432B09Rik | 8 | 0 | 0 | 0 |
| Sun2          | 6 | 0 | 0 | 0 |
| Dnalc4        | 3 | 0 | 0 | 0 |
| Nptxr         | 1 | 0 | 0 | 0 |
| Cbx6          | 1 | 0 | 0 | 0 |
| Rpl3          | 4 | 0 | 0 | 0 |
| Rps19bp1      | 3 | 0 | 0 | 0 |
| Slc25a17      | 1 | 0 | 0 | 0 |
| St13          | 6 | 0 | 0 | 0 |
| Chadl         | 1 | 0 | 0 | 0 |
| Rangap1       | 7 | 0 | 0 | 0 |
| Phf5a         | 1 | 0 | 0 | 0 |
| Polr3h        | 2 | 0 | 0 | 0 |
| Pmm1          | 1 | 0 | 0 | 0 |
| Pppde2        | 2 | 0 | 0 | 0 |
| Nhp2l1        | 4 | 0 | 0 | 0 |
| AI848285      | 3 | 0 | 0 | 0 |
| Cenpm         | 4 | 0 | 0 | 0 |
| Naga          | 5 | 0 | 0 | 0 |
| Ndufa6        | 2 | 0 | 0 | 0 |
| Cyp2d22       | 6 | 0 | 0 | 0 |
| Nfam1         | 6 | 0 | 0 | 0 |
| Poldip3       | 2 | 0 | 0 | 0 |
| Cyb5r3        | 6 | 0 | 0 | 0 |



|               |    |   |   |   |
|---------------|----|---|---|---|
| 1700001L05Rik | 5  | 0 | 0 | 0 |
| Pacsin2       | 7  | 0 | 0 | 0 |
| Ttll1         | 1  | 0 | 0 | 0 |
| Mcat          | 6  | 0 | 0 | 0 |
| Efcab6        | 4  | 0 | 0 | 0 |
| Sult4a1       | 6  | 0 | 0 | 0 |
| 1810041L15Rik | 7  | 0 | 0 | 0 |
| Ldoc1l        | 1  | 0 | 0 | 0 |
| 5031439G07Rik | 4  | 0 | 0 | 0 |
| XLOC_011571   | 1  | 0 | 0 | 0 |
| 2210021J22Rik | 4  | 0 | 0 | 0 |
| Cerk          | 8  | 0 | 0 | 0 |
| Brd1          | 8  | 0 | 0 | 0 |
| Alg12         | 3  | 0 | 0 | 0 |
| Ttll8         | 3  | 0 | 0 | 0 |
| Mlc1          | 5  | 0 | 0 | 0 |
| Tubgcp6       | 2  | 0 | 0 | 0 |
| Hdac10        | 6  | 0 | 0 | 0 |
| Mapk11        | 3  | 0 | 0 | 0 |
| Plxnb2        | 6  | 0 | 0 | 0 |
| Fam116b       | 10 | 0 | 0 | 0 |
| Sbf1          | 9  | 0 | 0 | 0 |
| Lmf2          | 5  | 0 | 0 | 0 |
| Tymp          | 3  | 0 | 0 | 0 |
| Odf3b         | 4  | 0 | 0 | 0 |
| Cpt1b         | 9  | 0 | 0 | 0 |
| Chkb          | 4  | 0 | 0 | 0 |
| Arsa          | 2  | 0 | 0 | 0 |
| Rab12         | 4  | 0 | 0 | 0 |
| Syt10         | 2  | 0 | 0 | 0 |
| Gm8759        | 1  | 0 | 0 | 0 |
| Kif21a        | 16 | 0 | 0 | 0 |
| Abcd2         | 3  | 0 | 0 | 0 |
| Slc2a13       | 1  | 0 | 0 | 0 |
| Gxylt1        | 5  | 0 | 0 | 0 |
| YAF2          | 3  | 0 | 0 | 0 |
| Zcrb1         | 4  | 0 | 0 | 0 |
| Adamts20      | 14 | 0 | 0 | 0 |
| Pus7l         | 2  | 0 | 0 | 0 |
| Twf1          | 4  | 0 | 0 | 0 |
| Nell2         | 7  | 0 | 0 | 0 |
| Dbx2          | 6  | 0 | 0 | 0 |
| AK163711      | 5  | 0 | 0 | 0 |
| Slc38a1       | 8  | 0 | 0 | 0 |
| Slc38a2       | 9  | 0 | 0 | 0 |
| Amigo2        | 3  | 0 | 0 | 0 |
| Rpap3         | 2  | 0 | 0 | 0 |

|               |    |   |   |   |
|---------------|----|---|---|---|
| HDAC7         | 5  | 0 | 0 | 0 |
| Vdr           | 1  | 0 | 0 | 0 |
| Asb8          | 3  | 0 | 0 | 0 |
| Ccnt1         | 3  | 0 | 0 | 0 |
| Ddx23         | 3  | 0 | 0 | 0 |
| Arf3          | 6  | 0 | 0 | 0 |
| Ddn           | 2  | 0 | 0 | 0 |
| Prkag1        | 5  | 0 | 0 | 0 |
| Mll2          | 9  | 0 | 0 | 0 |
| Dhh           | 1  | 0 | 0 | 0 |
| Lmbr1l        | 8  | 0 | 0 | 0 |
| C1ql4         | 1  | 0 | 0 | 0 |
| Nckap5l       | 8  | 0 | 0 | 0 |
| Bcdin3d       | 1  | 0 | 0 | 0 |
| Lass5         | 10 | 0 | 0 | 0 |
| Lima1         | 5  | 0 | 0 | 0 |
| Slc11a2       | 8  | 0 | 0 | 0 |
| Csrnp2        | 2  | 0 | 0 | 0 |
| Tcfcp2        | 10 | 0 | 0 | 0 |
| Pou6f1        | 7  | 0 | 0 | 0 |
| Smagp         | 2  | 0 | 0 | 0 |
| BC141885      | 4  | 0 | 0 | 0 |
| Cela1         | 3  | 0 | 0 | 0 |
| Galnt6        | 4  | 0 | 0 | 0 |
| AK146183      | 3  | 0 | 0 | 0 |
| Spryd3        | 6  | 0 | 0 | 0 |
| Csad          | 4  | 0 | 0 | 0 |
| Itgb7         | 2  | 0 | 0 | 0 |
| Rarg          | 7  | 0 | 0 | 0 |
| Aaas          | 1  | 0 | 0 | 0 |
| Map3k12       | 6  | 0 | 0 | 0 |
| Atf7          | 4  | 0 | 0 | 0 |
| Calcoco1      | 1  | 0 | 0 | 0 |
| AK035706      | 1  | 0 | 0 | 0 |
| XLOC_011689   | 1  | 0 | 0 | 0 |
| Cbx5          | 3  | 0 | 0 | 0 |
| Zfp385a       | 5  | 0 | 0 | 0 |
| Itga5         | 7  | 0 | 0 | 0 |
| Ppp1r1a       | 4  | 0 | 0 | 0 |
| Capsl         | 2  | 0 | 0 | 0 |
| Osr2          | 4  | 0 | 0 | 0 |
| XLOC_011008   | 1  | 0 | 0 | 0 |
| XLOC_011018   | 2  | 0 | 0 | 0 |
| AK171902      | 1  | 0 | 0 | 0 |
| Mtbp          | 4  | 0 | 0 | 0 |
| 9930014A18Rik | 1  | 0 | 0 | 0 |
| XLOC_011050   | 2  | 0 | 0 | 0 |

|               |   |   |   |   |
|---------------|---|---|---|---|
| Chrac1        | 2 | 0 | 0 | 0 |
| Ly6g          | 2 | 0 | 0 | 0 |
| Kifc2         | 7 | 0 | 0 | 0 |
| XLOC_011102   | 2 | 0 | 0 | 0 |
| Gga1          | 2 | 0 | 0 | 0 |
| Maff          | 3 | 0 | 0 | 0 |
| Gm4825        | 1 | 0 | 0 | 0 |
| XLOC_011191   | 4 | 0 | 0 | 0 |
| XLOC_011202   | 1 | 0 | 0 | 0 |
| Mov10l1       | 2 | 0 | 0 | 0 |
| XLOC_011213   | 1 | 0 | 0 | 0 |
| XLOC_011235   | 1 | 0 | 0 | 0 |
| Fam113b       | 1 | 0 | 0 | 0 |
| Gm5474        | 1 | 0 | 0 | 0 |
| Soat2         | 4 | 0 | 0 | 0 |
| Zfp740        | 7 | 0 | 0 | 0 |
| XLOC_011290   | 1 | 0 | 0 | 0 |
| Pfdn5         | 1 | 0 | 0 | 0 |
| Hoxc4         | 3 | 0 | 0 | 0 |
| BC157982      | 2 | 0 | 0 | 0 |
| XLOC_011345   | 2 | 0 | 0 | 0 |
| Snx31         | 3 | 0 | 0 | 0 |
| XLOC_011367   | 2 | 0 | 0 | 0 |
| Trappc9       | 2 | 0 | 0 | 0 |
| C030006K11Rik | 1 | 0 | 0 | 0 |
| AK085438      | 1 | 0 | 0 | 0 |
| Lgals2        | 2 | 0 | 0 | 0 |
| Npcd          | 3 | 0 | 0 | 0 |
| Cbx7          | 6 | 0 | 0 | 0 |
| Tcf20         | 4 | 0 | 0 | 0 |
| Rrp7a         | 2 | 0 | 0 | 0 |
| 2310037I24Rik | 6 | 0 | 0 | 0 |
| Rheb1         | 8 | 0 | 0 | 0 |
| Mcrs1         | 6 | 0 | 0 | 0 |
| Gm9763        | 1 | 0 | 0 | 0 |
| AK038079      | 1 | 0 | 0 | 0 |
| AK039268      | 4 | 0 | 0 | 0 |
| Krt1          | 2 | 0 | 0 | 0 |
| Heatr7b2      | 1 | 0 | 0 | 0 |
| Gm19276       | 1 | 0 | 0 | 0 |
| XLOC_010955   | 1 | 0 | 0 | 0 |
| Adamts12      | 1 | 0 | 0 | 0 |
| XLOC_010978   | 1 | 0 | 0 | 0 |
| XLOC_010981   | 3 | 0 | 0 | 0 |
| XLOC_011022   | 1 | 0 | 0 | 0 |
| XLOC_011047   | 1 | 0 | 0 | 0 |
| XLOC_011059   | 1 | 0 | 0 | 0 |

|               |   |   |   |   |
|---------------|---|---|---|---|
| AK158547      | 4 | 0 | 0 | 0 |
| Scx           | 1 | 0 | 0 | 0 |
| Mfsd3         | 1 | 0 | 0 | 0 |
| XLOC_011106   | 2 | 0 | 0 | 0 |
| XLOC_011121   | 1 | 0 | 0 | 0 |
| Kdelr3        | 1 | 0 | 0 | 0 |
| Apobec3       | 2 | 0 | 0 | 0 |
| XLOC_011140   | 2 | 0 | 0 | 0 |
| Smcr7l        | 5 | 0 | 0 | 0 |
| Ppp6r2        | 6 | 0 | 0 | 0 |
| Ccdc65        | 5 | 0 | 0 | 0 |
| XLOC_011249   | 1 | 0 | 0 | 0 |
| XLOC_011252   | 2 | 0 | 0 | 0 |
| Kcnh3         | 2 | 0 | 0 | 0 |
| AK138921      | 1 | 0 | 0 | 0 |
| AK043982      | 1 | 0 | 0 | 0 |
| Pde1b         | 2 | 0 | 0 | 0 |
| Fbxo4         | 3 | 0 | 0 | 0 |
| Spef2         | 1 | 0 | 0 | 0 |
| XLOC_011329   | 5 | 0 | 0 | 0 |
| XLOC_011342   | 1 | 0 | 0 | 0 |
| XLOC_011373   | 1 | 0 | 0 | 0 |
| XLOC_011375   | 2 | 0 | 0 | 0 |
| XLOC_011392   | 3 | 0 | 0 | 0 |
| Trps1         | 3 | 0 | 0 | 0 |
| XLOC_011409   | 2 | 0 | 0 | 0 |
| Fam84b        | 2 | 0 | 0 | 0 |
| XLOC_011430   | 1 | 0 | 0 | 0 |
| Recql4        | 5 | 0 | 0 | 0 |
| XLOC_011494   | 1 | 0 | 0 | 0 |
| 1700088E04Rik | 2 | 0 | 0 | 0 |
| XLOC_011528   | 1 | 0 | 0 | 0 |
| AK045688      | 1 | 0 | 0 | 0 |
| XLOC_011580   | 2 | 0 | 0 | 0 |
| XLOC_011611   | 1 | 0 | 0 | 0 |
| Senp1         | 2 | 0 | 0 | 0 |
| Fkbp11        | 1 | 0 | 0 | 0 |
| Prlr          | 2 | 0 | 0 | 0 |
| XLOC_011051   | 1 | 0 | 0 | 0 |
| XLOC_011090   | 1 | 0 | 0 | 0 |
| AK007210      | 2 | 0 | 0 | 0 |
| XLOC_011262   | 1 | 0 | 0 | 0 |
| XLOC_011269   | 2 | 0 | 0 | 0 |
| AB099516      | 1 | 0 | 0 | 0 |
| XLOC_011271   | 1 | 0 | 0 | 0 |
| Ccdc152       | 1 | 0 | 0 | 0 |
| AK148391      | 2 | 0 | 0 | 0 |

|               |   |   |   |   |
|---------------|---|---|---|---|
| 9130401M01Rik | 1 | 0 | 0 | 0 |
| XLOC_011437   | 1 | 0 | 0 | 0 |
| Slurp1        | 1 | 0 | 0 | 0 |
| Ly6k          | 1 | 0 | 0 | 0 |
| XLOC_011483   | 1 | 0 | 0 | 0 |
| Josd1         | 1 | 0 | 0 | 0 |
| Tnfrsf13c     | 2 | 0 | 0 | 0 |
| XLOC_011619   | 1 | 0 | 0 | 0 |
| Col2a1        | 1 | 0 | 0 | 0 |
| Krt80         | 3 | 0 | 0 | 0 |
| Atp5g2        | 1 | 0 | 0 | 0 |
| XLOC_010939   | 1 | 0 | 0 | 0 |
| Has2as        | 1 | 0 | 0 | 0 |
| Xpnpep3       | 3 | 0 | 0 | 0 |
| XLOC_011168   | 1 | 0 | 0 | 0 |
| XLOC_011227   | 1 | 0 | 0 | 0 |
| mKIAA0896     | 1 | 0 | 0 | 0 |
| XLOC_011395   | 1 | 0 | 0 | 0 |
| XLOC_011404   | 1 | 0 | 0 | 0 |
| XLOC_011420   | 1 | 0 | 0 | 0 |
| Parp10        | 2 | 0 | 0 | 0 |
| A4galt        | 1 | 0 | 0 | 0 |
| Mapk12        | 2 | 0 | 0 | 0 |
| Fam186b       | 1 | 0 | 0 | 0 |
| AK021197      | 2 | 0 | 0 | 0 |
| XLOC_011668   | 1 | 0 | 0 | 0 |
| D930007P13Rik | 1 | 0 | 0 | 0 |
| Gm5045        | 1 | 0 | 0 | 0 |
| AK171817      | 1 | 0 | 0 | 0 |
| XLOC_011080   | 1 | 0 | 0 | 0 |
| XLOC_011081   | 2 | 0 | 0 | 0 |
| XLOC_011175   | 1 | 0 | 0 | 0 |
| XLOC_011198   | 1 | 0 | 0 | 0 |
| Mettl7a2      | 1 | 0 | 0 | 0 |
| Hoxc5         | 1 | 0 | 0 | 0 |
| XLOC_011305   | 1 | 0 | 0 | 0 |
| XLOC_011378   | 1 | 0 | 0 | 0 |
| XLOC_011407   | 2 | 0 | 0 | 0 |
| Gml           | 1 | 0 | 0 | 0 |
| Dgat          | 1 | 0 | 0 | 0 |
| Apol10b       | 1 | 0 | 0 | 0 |
| Zfp263        | 4 | 0 | 0 | 0 |
| Zfp174        | 3 | 0 | 0 | 0 |
| Nat15         | 4 | 0 | 0 | 0 |
| Dnaja3        | 4 | 0 | 0 | 0 |
| Hmox2         | 4 | 0 | 0 | 0 |
| 4930562C15Rik | 1 | 0 | 0 | 0 |

|               |    |   |   |   |
|---------------|----|---|---|---|
| Mgrn1         | 4  | 0 | 0 | 0 |
| Ubn1          | 1  | 0 | 0 | 0 |
| Alg1          | 2  | 0 | 0 | 0 |
| Rbfox1        | 14 | 0 | 0 | 0 |
| BC024814      | 3  | 0 | 0 | 0 |
| Pmm2          | 1  | 0 | 0 | 0 |
| 1810013L24Rik | 1  | 0 | 0 | 0 |
| Nubp1         | 4  | 0 | 0 | 0 |
| Clec16a       | 9  | 0 | 0 | 0 |
| DQ072382      | 2  | 0 | 0 | 0 |
| Snn           | 1  | 0 | 0 | 0 |
| Ercc4         | 2  | 0 | 0 | 0 |
| Mkl2          | 3  | 0 | 0 | 0 |
| Bfar          | 1  | 0 | 0 | 0 |
| Rrn3          | 2  | 0 | 0 | 0 |
| XLOC_012464   | 1  | 0 | 0 | 0 |
| 2900011O08Rik | 3  | 0 | 0 | 0 |
| Nde1          | 2  | 0 | 0 | 0 |
| Efcab1        | 2  | 0 | 0 | 0 |
| Prkdc         | 10 | 0 | 0 | 0 |
| Ppm1f         | 2  | 0 | 0 | 0 |
| Mapk1         | 5  | 0 | 0 | 0 |
| Ydjc          | 4  | 0 | 0 | 0 |
| Snap29        | 1  | 0 | 0 | 0 |
| Crkl          | 3  | 0 | 0 | 0 |
| P2rx6         | 1  | 0 | 0 | 0 |
| Smpd4         | 4  | 0 | 0 | 0 |
| Klhl22        | 6  | 0 | 0 | 0 |
| Tssk1         | 1  | 0 | 0 | 0 |
| Dgcr6         | 2  | 0 | 0 | 0 |
| Rtn4r         | 1  | 0 | 0 | 0 |
| Trmt2a        | 3  | 0 | 0 | 0 |
| Arvcf         | 6  | 0 | 0 | 0 |
| Ufd1l         | 2  | 0 | 0 | 0 |
| 2510002D24Rik | 2  | 0 | 0 | 0 |
| XLOC_012499   | 3  | 0 | 0 | 0 |
| Klhl24        | 2  | 0 | 0 | 0 |
| Yeats2        | 10 | 0 | 0 | 0 |
| Eif2b5        | 4  | 0 | 0 | 0 |
| Ap2m1         | 6  | 0 | 0 | 0 |
| Abcf3         | 3  | 0 | 0 | 0 |
| Ece2          | 7  | 0 | 0 | 0 |
| Eif4g1        | 8  | 0 | 0 | 0 |
| Fam131a       | 2  | 0 | 0 | 0 |
| Polr2h        | 5  | 0 | 0 | 0 |
| Ephb3         | 3  | 0 | 0 | 0 |
| Map3k13       | 3  | 0 | 0 | 0 |

|               |    |   |   |   |
|---------------|----|---|---|---|
| Senp2         | 1  | 0 | 0 | 0 |
| Dnajb11       | 1  | 0 | 0 | 0 |
| Hrg           | 3  | 0 | 0 | 0 |
| Eif4a2        | 3  | 0 | 0 | 0 |
| St6gal1       | 5  | 0 | 0 | 0 |
| AK144897      | 10 | 0 | 0 | 0 |
| Lpp           | 7  | 0 | 0 | 0 |
| Tprg          | 3  | 0 | 0 | 0 |
| Trp63         | 2  | 0 | 0 | 0 |
| Il1rap        | 3  | 0 | 0 | 0 |
| Ccdc50        | 4  | 0 | 0 | 0 |
| Opa1          | 6  | 0 | 0 | 0 |
| 4632428C04Rik | 6  | 0 | 0 | 0 |
| Hes1          | 2  | 0 | 0 | 0 |
| Fam43a        | 1  | 0 | 0 | 0 |
| Gm15703       | 1  | 0 | 0 | 0 |
| Ncbp2         | 1  | 0 | 0 | 0 |
| 1500031L02Rik | 1  | 0 | 0 | 0 |
| Rnf168        | 2  | 0 | 0 | 0 |
| Tctex1d2      | 1  | 0 | 0 | 0 |
| Pcyt1a        | 5  | 0 | 0 | 0 |
| Zdhhc19       | 1  | 0 | 0 | 0 |
| Tfrc          | 3  | 0 | 0 | 0 |
| Tnk2          | 12 | 0 | 0 | 0 |
| Fyttd1        | 1  | 0 | 0 | 0 |
| Lrch3         | 3  | 0 | 0 | 0 |
| Lmln          | 1  | 0 | 0 | 0 |
| Zfp148        | 6  | 0 | 0 | 0 |
| Heg1          | 4  | 0 | 0 | 0 |
| Ccdc14        | 7  | 0 | 0 | 0 |
| Adcy5         | 4  | 0 | 0 | 0 |
| Kpna1         | 4  | 0 | 0 | 0 |
| lqcb1         | 8  | 0 | 0 | 0 |
| Golgb1        | 8  | 0 | 0 | 0 |
| Hcls1         | 1  | 0 | 0 | 0 |
| Rabl3         | 1  | 0 | 0 | 0 |
| Lrrc58        | 2  | 0 | 0 | 0 |
| Gpr156        | 6  | 0 | 0 | 0 |
| Gsk3b         | 4  | 0 | 0 | 0 |
| Cox17         | 1  | 0 | 0 | 0 |
| B4galt4       | 3  | 0 | 0 | 0 |
| Igsf11        | 1  | 0 | 0 | 0 |
| Lsamp         | 5  | 0 | 0 | 0 |
| BC002163      | 1  | 0 | 0 | 0 |
| Naa50         | 2  | 0 | 0 | 0 |
| Gm608         | 1  | 0 | 0 | 0 |
| Spice1        | 2  | 0 | 0 | 0 |

|             |   |   |   |   |
|-------------|---|---|---|---|
| BC027231    | 2 | 0 | 0 | 0 |
| Ccdc80      | 5 | 0 | 0 | 0 |
| XLOC_012612 | 6 | 0 | 0 | 0 |
| Gm7204      | 1 | 0 | 0 | 0 |
| Morc1       | 3 | 0 | 0 | 0 |
| Myh15       | 1 | 0 | 0 | 0 |
| Ift57       | 3 | 0 | 0 | 0 |
| Cblb        | 5 | 0 | 0 | 0 |
| Zbtb11      | 3 | 0 | 0 | 0 |
| Abi3bp      | 9 | 0 | 0 | 0 |
| Tomm70a     | 6 | 0 | 0 | 0 |
| Dcbl2       | 3 | 0 | 0 | 0 |
| Cpox        | 1 | 0 | 0 | 0 |
| Cldnd1      | 4 | 0 | 0 | 0 |
| Mina        | 1 | 0 | 0 | 0 |
| Gm9027      | 1 | 0 | 0 | 0 |
| Pros1       | 3 | 0 | 0 | 0 |
| Cggbp1      | 2 | 0 | 0 | 0 |
| Vgl3        | 2 | 0 | 0 | 0 |
| Gbe1        | 4 | 0 | 0 | 0 |
| Rbm11       | 1 | 0 | 0 | 0 |
| Usp25       | 4 | 0 | 0 | 0 |
| Cxadr       | 5 | 0 | 0 | 0 |
| Chodl       | 2 | 0 | 0 | 0 |
| Ncam2       | 2 | 0 | 0 | 0 |
| Jam2        | 4 | 0 | 0 | 0 |
| Gabpa       | 2 | 0 | 0 | 0 |
| N6amt1      | 3 | 0 | 0 | 0 |
| Bach1       | 5 | 0 | 0 | 0 |
| Sod1        | 4 | 0 | 0 | 0 |
| Hunk        | 2 | 0 | 0 | 0 |
| Mrap        | 2 | 0 | 0 | 0 |
| Ifnar2      | 4 | 0 | 0 | 0 |
| Il10rb      | 2 | 0 | 0 | 0 |
| Son         | 2 | 0 | 0 | 0 |
| Itn1        | 4 | 0 | 0 | 0 |
| Mrps6       | 2 | 0 | 0 | 0 |
| Fam165b     | 3 | 0 | 0 | 0 |
| Dopey2      | 9 | 0 | 0 | 0 |
| Morc3       | 6 | 0 | 0 | 0 |
| Ttc3        | 8 | 0 | 0 | 0 |
| Dyrk1a      | 6 | 0 | 0 | 0 |
| Ets2        | 1 | 0 | 0 | 0 |
| Wrb         | 4 | 0 | 0 | 0 |
| Sh3bgr      | 4 | 0 | 0 | 0 |
| B3galt5     | 3 | 0 | 0 | 0 |
| Pcp4        | 1 | 0 | 0 | 0 |



|               |    |   |   |   |
|---------------|----|---|---|---|
| Bace2         | 3  | 0 | 0 | 0 |
| Zfp597        | 2  | 0 | 0 | 0 |
| 1700037C18Rik | 3  | 0 | 0 | 0 |
| Nlrc3         | 7  | 0 | 0 | 0 |
| Btbd12        | 1  | 0 | 0 | 0 |
| Trap1         | 6  | 0 | 0 | 0 |
| Adcy9         | 3  | 0 | 0 | 0 |
| Srl           | 1  | 0 | 0 | 0 |
| Coro7         | 9  | 0 | 0 | 0 |
| Nmral1        | 2  | 0 | 0 | 0 |
| 5730403B10Rik | 2  | 0 | 0 | 0 |
| Rogdi         | 2  | 0 | 0 | 0 |
| Glyr1         | 16 | 0 | 0 | 0 |
| Ppl           | 1  | 0 | 0 | 0 |
| Nagpa         | 4  | 0 | 0 | 0 |
| AU021092      | 1  | 0 | 0 | 0 |
| Fam86         | 1  | 0 | 0 | 0 |
| Tmem114       | 2  | 0 | 0 | 0 |
| Carhsp1       | 3  | 0 | 0 | 0 |
| Usp7          | 3  | 0 | 0 | 0 |
| Tekt5         | 1  | 0 | 0 | 0 |
| Fam18a        | 6  | 0 | 0 | 0 |
| Socs1         | 2  | 0 | 0 | 0 |
| Litaf         | 2  | 0 | 0 | 0 |
| Txndc11       | 3  | 0 | 0 | 0 |
| Rsl1d1        | 1  | 0 | 0 | 0 |
| Gspt1         | 3  | 0 | 0 | 0 |
| Cpped1        | 4  | 0 | 0 | 0 |
| Pdxdc1        | 2  | 0 | 0 | 0 |
| 4921513D23Rik | 7  | 0 | 0 | 0 |
| 0610037P05Rik | 4  | 0 | 0 | 0 |
| Ube2v2        | 5  | 0 | 0 | 0 |
| Mcm4          | 1  | 0 | 0 | 0 |
| Mzt2          | 1  | 0 | 0 | 0 |
| 2310008H04Rik | 3  | 0 | 0 | 0 |
| Dnm1l         | 7  | 0 | 0 | 0 |
| Sdf2l1        | 1  | 0 | 0 | 0 |
| Pi4ka         | 8  | 0 | 0 | 0 |
| Slc7a4        | 5  | 0 | 0 | 0 |
| Med15         | 9  | 0 | 0 | 0 |
| Dgcr2         | 5  | 0 | 0 | 0 |
| Dgcr14        | 4  | 0 | 0 | 0 |
| Slc25a1       | 4  | 0 | 0 | 0 |
| 4933432I09Rik | 5  | 0 | 0 | 0 |
| Zdhhc8        | 9  | 0 | 0 | 0 |
| Ranbp1        | 3  | 0 | 0 | 0 |
| Dgcr8         | 2  | 0 | 0 | 0 |

|               |    |   |   |   |
|---------------|----|---|---|---|
| D16H22S680E   | 5  | 0 | 0 | 0 |
| Comt          | 7  | 0 | 0 | 0 |
| Mrpl40        | 5  | 0 | 0 | 0 |
| A930003A15Rik | 3  | 0 | 0 | 0 |
| Map6d1        | 2  | 0 | 0 | 0 |
| Abcc5         | 5  | 0 | 0 | 0 |
| Alg3          | 4  | 0 | 0 | 0 |
| Camk2n2       | 2  | 0 | 0 | 0 |
| Clcn2         | 6  | 0 | 0 | 0 |
| Gm8017        | 1  | 0 | 0 | 0 |
| XLOC_012801   | 1  | 0 | 0 | 0 |
| 2510009E07Rik | 4  | 0 | 0 | 0 |
| Ehhadh        | 4  | 0 | 0 | 0 |
| Tmem41a       | 3  | 0 | 0 | 0 |
| Tra2b         | 6  | 0 | 0 | 0 |
| Etv5          | 7  | 0 | 0 | 0 |
| Dgkg          | 7  | 0 | 0 | 0 |
| Masp1         | 2  | 0 | 0 | 0 |
| Sst           | 1  | 0 | 0 | 0 |
| Bcl6          | 7  | 0 | 0 | 0 |
| AK039760      | 2  | 0 | 0 | 0 |
| AK004252      | 1  | 0 | 0 | 0 |
| Leprel1       | 5  | 0 | 0 | 0 |
| Cldn1         | 1  | 0 | 0 | 0 |
| Uts2d         | 1  | 0 | 0 | 0 |
| Fgf12         | 9  | 0 | 0 | 0 |
| 1600021P15Rik | 2  | 0 | 0 | 0 |
| Atp13a4       | 6  | 0 | 0 | 0 |
| AK165338      | 11 | 0 | 0 | 0 |
| Atp13a3       | 7  | 0 | 0 | 0 |
| Tmem44        | 5  | 0 | 0 | 0 |
| Al480653      | 5  | 0 | 0 | 0 |
| Acap2         | 5  | 0 | 0 | 0 |
| Apod          | 4  | 0 | 0 | 0 |
| Senp5         | 6  | 0 | 0 | 0 |
| Pak2          | 2  | 0 | 0 | 0 |
| Fbxo45        | 1  | 0 | 0 | 0 |
| Osta          | 1  | 0 | 0 | 0 |
| 1700021K19Rik | 7  | 0 | 0 | 0 |
| AK160141      | 2  | 0 | 0 | 0 |
| Umps          | 2  | 0 | 0 | 0 |
| Sec22a        | 3  | 0 | 0 | 0 |
| Pdia5         | 5  | 0 | 0 | 0 |
| Dirc2         | 4  | 0 | 0 | 0 |
| Parp14        | 4  | 0 | 0 | 0 |
| AK144265      | 2  | 0 | 0 | 0 |
| Fam162a       | 2  | 0 | 0 | 0 |

|               |    |   |   |   |
|---------------|----|---|---|---|
| Stxbp5l       | 6  | 0 | 0 | 0 |
| Gtf2e1        | 4  | 0 | 0 | 0 |
| Ndufb4        | 2  | 0 | 0 | 0 |
| 4932425I24Rik | 2  | 0 | 0 | 0 |
| Pla1a         | 4  | 0 | 0 | 0 |
| Adprh         | 2  | 0 | 0 | 0 |
| 4930455C21Rik | 3  | 0 | 0 | 0 |
| Ktelc1        | 4  | 0 | 0 | 0 |
| Poglut1       | 1  | 0 | 0 | 0 |
| Arhgap31      | 5  | 0 | 0 | 0 |
| AK016521      | 1  | 0 | 0 | 0 |
| Tigit         | 1  | 0 | 0 | 0 |
| Qtrtd1        | 7  | 0 | 0 | 0 |
| Zdhhc23       | 9  | 0 | 0 | 0 |
| XLOC_012890   | 1  | 0 | 0 | 0 |
| Atp6v1a       | 5  | 0 | 0 | 0 |
| Boc           | 8  | 0 | 0 | 0 |
| Gtpbp8        | 3  | 0 | 0 | 0 |
| Cd200         | 2  | 0 | 0 | 0 |
| Gm609         | 2  | 0 | 0 | 0 |
| Tagln3        | 7  | 0 | 0 | 0 |
| Abhd10        | 4  | 0 | 0 | 0 |
| Phldb2        | 6  | 0 | 0 | 0 |
| Plcxd2        | 4  | 0 | 0 | 0 |
| Gm4737        | 1  | 0 | 0 | 0 |
| Pvrl3         | 6  | 0 | 0 | 0 |
| XLOC_012906   | 3  | 0 | 0 | 0 |
| Dzip3         | 5  | 0 | 0 | 0 |
| Bbx           | 14 | 0 | 0 | 0 |
| Gm9575        | 1  | 0 | 0 | 0 |
| Alcam         | 8  | 0 | 0 | 0 |
| Fam55c        | 6  | 0 | 0 | 0 |
| Cep97         | 3  | 0 | 0 | 0 |
| Pcnp          | 3  | 0 | 0 | 0 |
| Tfg           | 5  | 0 | 0 | 0 |
| Tbc1d23       | 3  | 0 | 0 | 0 |
| Col8a1        | 1  | 0 | 0 | 0 |
| St3gal6       | 6  | 0 | 0 | 0 |
| Crybg3        | 4  | 0 | 0 | 0 |
| Arl6          | 2  | 0 | 0 | 0 |
| Nsun3         | 3  | 0 | 0 | 0 |
| Arl13b        | 3  | 0 | 0 | 0 |
| 4930453N24Rik | 3  | 0 | 0 | 0 |
| Zfp654        | 4  | 0 | 0 | 0 |
| Chmp2b        | 3  | 0 | 0 | 0 |
| Robo2         | 10 | 0 | 0 | 0 |
| Hspa13        | 1  | 0 | 0 | 0 |

|               |    |   |   |   |
|---------------|----|---|---|---|
| Nrip1         | 7  | 0 | 0 | 0 |
| AK087725      | 7  | 0 | 0 | 0 |
| XLOC_012955   | 2  | 0 | 0 | 0 |
| Atp5j         | 4  | 0 | 0 | 0 |
| App           | 10 | 0 | 0 | 0 |
| AK080982      | 1  | 0 | 0 | 0 |
| Cyr1          | 2  | 0 | 0 | 0 |
| Adamts1       | 3  | 0 | 0 | 0 |
| Adamts5       | 4  | 0 | 0 | 0 |
| Ltn1          | 7  | 0 | 0 | 0 |
| Rwdd2b        | 2  | 0 | 0 | 0 |
| Cct8          | 4  | 0 | 0 | 0 |
| Grik1         | 5  | 0 | 0 | 0 |
| 2610039C10Rik | 1  | 0 | 0 | 0 |
| 1110004E09Rik | 3  | 0 | 0 | 0 |
| Synj1         | 20 | 0 | 0 | 0 |
| Gcfc1         | 7  | 0 | 0 | 0 |
| C21orf66      | 1  | 0 | 0 | 0 |
| Tmem50b       | 5  | 0 | 0 | 0 |
| Dnajc28       | 4  | 0 | 0 | 0 |
| Gart          | 3  | 0 | 0 | 0 |
| Cryzl1        | 2  | 0 | 0 | 0 |
| Atp5o         | 4  | 0 | 0 | 0 |
| Rcan1         | 4  | 0 | 0 | 0 |
| Runx1         | 8  | 0 | 0 | 0 |
| Setd4         | 14 | 0 | 0 | 0 |
| Cldn14        | 3  | 0 | 0 | 0 |
| Hlcs          | 9  | 0 | 0 | 0 |
| Dscr3         | 1  | 0 | 0 | 0 |
| Kcnj6         | 1  | 0 | 0 | 0 |
| Psmg1         | 1  | 0 | 0 | 0 |
| Brwd1         | 6  | 0 | 0 | 0 |
| Hmgn1         | 3  | 0 | 0 | 0 |
| Lca5l         | 2  | 0 | 0 | 0 |
| Dscam         | 6  | 0 | 0 | 0 |
| Prdm15        | 7  | 0 | 0 | 0 |
| C2cd2         | 9  | 0 | 0 | 0 |
| Zfp295        | 9  | 0 | 0 | 0 |
| Cluap1        | 2  | 0 | 0 | 0 |
| Nudt16l1      | 1  | 0 | 0 | 0 |
| AK154225      | 5  | 0 | 0 | 0 |
| Abat          | 2  | 0 | 0 | 0 |
| AK014704      | 2  | 0 | 0 | 0 |
| XLOC_012461   | 1  | 0 | 0 | 0 |
| Yars2         | 2  | 0 | 0 | 0 |
| Ypel1         | 1  | 0 | 0 | 0 |
| mP2XM         | 1  | 0 | 0 | 0 |

|               |       |    |   |   |   |
|---------------|-------|----|---|---|---|
| Scarf2        |       | 5  | 0 | 0 | 0 |
| Hira          |       | 4  | 0 | 0 | 0 |
| AK005305      |       | 1  | 0 | 0 | 0 |
| Wdr53         |       | 3  | 0 | 0 | 0 |
| Hspbap1       |       | 1  | 0 | 0 | 0 |
| Parp9         |       | 1  | 0 | 0 | 0 |
| Fstl1         |       | 2  | 0 | 0 | 0 |
| XLOC_012597   |       | 4  | 0 | 0 | 0 |
| Atg3          |       | 4  | 0 | 0 | 0 |
| Cd47          |       | 6  | 0 | 0 | 0 |
| Rpl24         |       | 4  | 0 | 0 | 0 |
| 2810055G20Rik |       | 6  | 0 | 0 | 0 |
| AK045112      |       | 2  | 0 | 0 | 0 |
| ORF63         |       | 1  | 0 | 0 | 0 |
| XLOC_012677   |       | 1  | 0 | 0 | 0 |
| BC056174      |       | 1  | 0 | 0 | 0 |
| Anks3         |       | 4  | 0 | 0 | 0 |
| Zc3h7a        |       | 3  | 0 | 0 | 0 |
| Thap7         |       | 4  | 0 | 0 | 0 |
|               | 41887 | 3  | 0 | 0 | 0 |
| Rfc4          |       | 4  | 0 | 0 | 0 |
| Iqcg          |       | 4  | 0 | 0 | 0 |
| Kalrn         |       | 10 | 0 | 0 | 0 |
| XLOC_012857   |       | 1  | 0 | 0 | 0 |
| XLOC_012875   |       | 1  | 0 | 0 | 0 |
| Slc35a5       |       | 3  | 0 | 0 | 0 |
| AK135986      |       | 1  | 0 | 0 | 0 |
| Gm6767        |       | 1  | 0 | 0 | 0 |
| AK157531      |       | 3  | 0 | 0 | 0 |
| Nfkbiz        |       | 4  | 0 | 0 | 0 |
| Nit2          |       | 1  | 0 | 0 | 0 |
| Htr1f         |       | 2  | 0 | 0 | 0 |
| XLOC_012946   |       | 7  | 0 | 0 | 0 |
| Rnf160        |       | 1  | 0 | 0 | 0 |
| Donson        |       | 4  | 0 | 0 | 0 |
| Shisa9        |       | 2  | 0 | 0 | 0 |
| Hic2          |       | 1  | 0 | 0 | 0 |
| Gnb1l         |       | 5  | 0 | 0 | 0 |
| Vwa5b2        |       | 4  | 0 | 0 | 0 |
| Chrd          |       | 6  | 0 | 0 | 0 |
| 2010005H15Rik |       | 1  | 0 | 0 | 0 |
| Polq          |       | 3  | 0 | 0 | 0 |
| XLOC_012587   |       | 1  | 0 | 0 | 0 |
| XLOC_012623   |       | 1  | 0 | 0 | 0 |
| XLOC_012625   |       | 1  | 0 | 0 | 0 |
| Gabbr3        |       | 1  | 0 | 0 | 0 |
| XLOC_012658   |       | 1  | 0 | 0 | 0 |

|               |   |   |   |   |
|---------------|---|---|---|---|
| Clic6         | 1 | 0 | 0 | 0 |
| XLOC_012688   | 2 | 0 | 0 | 0 |
| XLOC_012689   | 2 | 0 | 0 | 0 |
| Cbr3          | 1 | 0 | 0 | 0 |
| XLOC_012704   | 1 | 0 | 0 | 0 |
| XLOC_012752   | 1 | 0 | 0 | 0 |
| Ccdc116       | 2 | 0 | 0 | 0 |
| Prodh         | 2 | 0 | 0 | 0 |
| XLOC_012820   | 1 | 0 | 0 | 0 |
| Casr          | 4 | 0 | 0 | 0 |
| AK045242      | 1 | 0 | 0 | 0 |
| AK084744      | 1 | 0 | 0 | 0 |
| AK015492      | 1 | 0 | 0 | 0 |
| D16Ertd472e   | 4 | 0 | 0 | 0 |
| XLOC_012983   | 5 | 0 | 0 | 0 |
| XLOC_012990   | 1 | 0 | 0 | 0 |
| B230307C23Rik | 1 | 0 | 0 | 0 |
| XLOC_012453   | 1 | 0 | 0 | 0 |
| XLOC_012459   | 2 | 0 | 0 | 0 |
| Mpv17l        | 3 | 0 | 0 | 0 |
| Wdvcf         | 1 | 0 | 0 | 0 |
| Fetub         | 1 | 0 | 0 | 0 |
| XLOC_012529   | 5 | 0 | 0 | 0 |
| XLOC_012532   | 1 | 0 | 0 | 0 |
| XLOC_012552   | 1 | 0 | 0 | 0 |
| Gm5483        | 1 | 0 | 0 | 0 |
| Wdr52         | 1 | 0 | 0 | 0 |
| Cd200r1       | 1 | 0 | 0 | 0 |
| Gm15640       | 1 | 0 | 0 | 0 |
| Gm9017        | 1 | 0 | 0 | 0 |
| Usp16         | 1 | 0 | 0 | 0 |
| AK038602      | 5 | 0 | 0 | 0 |
| XLOC_012720   | 1 | 0 | 0 | 0 |
| Tmem186       | 1 | 0 | 0 | 0 |
| Gm16618       | 1 | 0 | 0 | 0 |
| Lrrc15        | 1 | 0 | 0 | 0 |
| XLOC_012840   | 2 | 0 | 0 | 0 |
| mKIAA0226     | 1 | 0 | 0 | 0 |
| Dtx3l         | 1 | 0 | 0 | 0 |
| Stfa2         | 3 | 0 | 0 | 0 |
| Traits        | 1 | 0 | 0 | 0 |
| XLOC_012894   | 1 | 0 | 0 | 0 |
| E330017A01Rik | 1 | 0 | 0 | 0 |
| Btg3          | 1 | 0 | 0 | 0 |
| Mx1           | 4 | 0 | 0 | 0 |
| Vasn          | 1 | 0 | 0 | 0 |
| Ciita         | 2 | 0 | 0 | 0 |

|               |    |   |   |   |
|---------------|----|---|---|---|
| 4930509G22Rik | 1  | 0 | 0 | 0 |
| XLOC_012501   | 1  | 0 | 0 | 0 |
| XLOC_012509   | 1  | 0 | 0 | 0 |
| XLOC_012541   | 1  | 0 | 0 | 0 |
| Rpl35a        | 4  | 0 | 0 | 0 |
| XLOC_012578   | 1  | 0 | 0 | 0 |
| Btla          | 1  | 0 | 0 | 0 |
| C330027C09Rik | 1  | 0 | 0 | 0 |
| Igsf5         | 1  | 0 | 0 | 0 |
| Cdc45         | 3  | 0 | 0 | 0 |
| XLOC_012832   | 2  | 0 | 0 | 0 |
| Pigx          | 1  | 0 | 0 | 0 |
| XLOC_012443   | 1  | 0 | 0 | 0 |
| Txnrd2        | 1  | 0 | 0 | 0 |
| XLOC_012531   | 1  | 0 | 0 | 0 |
| Cd80          | 1  | 0 | 0 | 0 |
| Gm5406        | 1  | 0 | 0 | 0 |
| Filip1l       | 1  | 0 | 0 | 0 |
| Tmem45a       | 2  | 0 | 0 | 0 |
| XLOC_012932   | 1  | 0 | 0 | 0 |
| Epha3         | 2  | 0 | 0 | 0 |
| Scaf8         | 8  | 0 | 0 | 0 |
| Arid1b        | 5  | 0 | 0 | 0 |
| Zdhhc14       | 8  | 0 | 0 | 0 |
| XLOC_013767   | 1  | 0 | 0 | 0 |
| Snx9          | 7  | 0 | 0 | 0 |
| Synj2         | 7  | 0 | 0 | 0 |
| Gtf2h5        | 2  | 0 | 0 | 0 |
| Tulp4         | 5  | 0 | 0 | 0 |
| Tmem181a      | 3  | 0 | 0 | 0 |
| Dynlt1c       | 1  | 0 | 0 | 0 |
| Sytl3         | 3  | 0 | 0 | 0 |
| Rnaset2b      | 4  | 0 | 0 | 0 |
| Rps6ka2       | 6  | 0 | 0 | 0 |
| Rsph3a        | 1  | 0 | 0 | 0 |
| Fgfr1op       | 4  | 0 | 0 | 0 |
| Sft2d1        | 4  | 0 | 0 | 0 |
| Pde10a        | 4  | 0 | 0 | 0 |
| 1700010I14Rik | 6  | 0 | 0 | 0 |
| Agpat4        | 4  | 0 | 0 | 0 |
| XLOC_013794   | 1  | 0 | 0 | 0 |
| Slc22a2       | 1  | 0 | 0 | 0 |
| Airn          | 3  | 0 | 0 | 0 |
| XLOC_013801   | 1  | 0 | 0 | 0 |
| Sod2          | 4  | 0 | 0 | 0 |
| Tcp10a        | 3  | 0 | 0 | 0 |
| Mllt4         | 11 | 0 | 0 | 0 |

|               |   |   |   |   |
|---------------|---|---|---|---|
| Smoc2         | 1 | 0 | 0 | 0 |
| Fam120b       | 3 | 0 | 0 | 0 |
| Chd1          | 8 | 0 | 0 | 0 |
| Riok2         | 1 | 0 | 0 | 0 |
| Lix1          | 6 | 0 | 0 | 0 |
| XLOC_013822   | 4 | 0 | 0 | 0 |
| 4930546H06Rik | 9 | 0 | 0 | 0 |
| XLOC_013825   | 4 | 0 | 0 | 0 |
| Ppp2r1a       | 4 | 0 | 0 | 0 |
| Zfp160        | 2 | 0 | 0 | 0 |
| Zfp677        | 5 | 0 | 0 | 0 |
| Zfp948        | 4 | 0 | 0 | 0 |
| Hcfc1r1       | 4 | 0 | 0 | 0 |
| Srrm2         | 7 | 0 | 0 | 0 |
| Prss32        | 1 | 0 | 0 | 0 |
| Abca3         | 2 | 0 | 0 | 0 |
| Rnps1         | 9 | 0 | 0 | 0 |
| Dci           | 4 | 0 | 0 | 0 |
| Pgp           | 1 | 0 | 0 | 0 |
| XLOC_013856   | 1 | 0 | 0 | 0 |
| Caskin1       | 2 | 0 | 0 | 0 |
| AK011460      | 1 | 0 | 0 | 0 |
| Nthl1         | 3 | 0 | 0 | 0 |
| Zfp598        | 6 | 0 | 0 | 0 |
| Sepx1         | 2 | 0 | 0 | 0 |
| Hs3st6        | 3 | 0 | 0 | 0 |
| Hagh          | 6 | 0 | 0 | 0 |
| Igfals        | 2 | 0 | 0 | 0 |
| Ift140        | 4 | 0 | 0 | 0 |
| Clcn7         | 4 | 0 | 0 | 0 |
| BC003965      | 1 | 0 | 0 | 0 |
| Unkl          | 5 | 0 | 0 | 0 |
| AK079380      | 4 | 0 | 0 | 0 |
| Lmf1          | 3 | 0 | 0 | 0 |
| Rpusd1        | 5 | 0 | 0 | 0 |
| Ccdc78        | 3 | 0 | 0 | 0 |
| Fbxl16        | 5 | 0 | 0 | 0 |
| Wdr24         | 2 | 0 | 0 | 0 |
| Jmjd8         | 1 | 0 | 0 | 0 |
| 0610011F06Rik | 3 | 0 | 0 | 0 |
| Tmem8         | 3 | 0 | 0 | 0 |
| Mrpl28        | 1 | 0 | 0 | 0 |
| Axin1         | 4 | 0 | 0 | 0 |
| Rgs11         | 2 | 0 | 0 | 0 |
| Luc7l         | 2 | 0 | 0 | 0 |
| Ergic1        | 1 | 0 | 0 | 0 |
| Atp6v0e       | 1 | 0 | 0 | 0 |



|               |   |   |   |   |
|---------------|---|---|---|---|
| A930001N09Rik | 6 | 0 | 0 | 0 |
| Kifc5b        | 8 | 0 | 0 | 0 |
| Tctex-3       | 1 | 0 | 0 | 0 |
| Phf1          | 4 | 0 | 0 | 0 |
| XLOC_013900   | 7 | 0 | 0 | 0 |
| Zbtb9         | 4 | 0 | 0 | 0 |
| Ggnbp1        | 1 | 0 | 0 | 0 |
| Itpr3         | 6 | 0 | 0 | 0 |
| Pacsin1       | 4 | 0 | 0 | 0 |
| Uhrf1bp1      | 2 | 0 | 0 | 0 |
| Anks1         | 6 | 0 | 0 | 0 |
| Scube3        | 7 | 0 | 0 | 0 |
| Zfp523        | 5 | 0 | 0 | 0 |
| Def6          | 3 | 0 | 0 | 0 |
| Ppard         | 3 | 0 | 0 | 0 |
| Rpl10a        | 4 | 0 | 0 | 0 |
| Lhfp15        | 1 | 0 | 0 | 0 |
| Mapk14        | 4 | 0 | 0 | 0 |
| Mapk13        | 1 | 0 | 0 | 0 |
| Kctd20        | 3 | 0 | 0 | 0 |
| Sfrs3         | 7 | 0 | 0 | 0 |
| Cdkn1a        | 3 | 0 | 0 | 0 |
| BC004004      | 5 | 0 | 0 | 0 |
| Pi16          | 5 | 0 | 0 | 0 |
| Fgd2          | 9 | 0 | 0 | 0 |
| Pim1          | 2 | 0 | 0 | 0 |
| Rnf8          | 2 | 0 | 0 | 0 |
| Ftsjd2        | 3 | 0 | 0 | 0 |
| Zfand3        | 6 | 0 | 0 | 0 |
| Abcg1         | 2 | 0 | 0 | 0 |
| Slc37a1       | 5 | 0 | 0 | 0 |
| Pde9a         | 5 | 0 | 0 | 0 |
| Ndufv3        | 1 | 0 | 0 | 0 |
| Pknox1        | 6 | 0 | 0 | 0 |
| Cyp4f39       | 2 | 0 | 0 | 0 |
| Cyp4f16       | 7 | 0 | 0 | 0 |
| XLOC_013948   | 5 | 0 | 0 | 0 |
| C920016K16Rik | 3 | 0 | 0 | 0 |
| Zfp472        | 1 | 0 | 0 | 0 |
| Zfp952        | 1 | 0 | 0 | 0 |
| Zfp563        | 2 | 0 | 0 | 0 |
| Zfp955b       | 2 | 0 | 0 | 0 |
| Adamts10      | 7 | 0 | 0 | 0 |
| Pram1         | 8 | 0 | 0 | 0 |
| Kank3         | 4 | 0 | 0 | 0 |
| Cd320         | 1 | 0 | 0 | 0 |
| Daxx          | 3 | 0 | 0 | 0 |

|               |    |   |   |   |
|---------------|----|---|---|---|
| Tapbp         | 2  | 0 | 0 | 0 |
| Wdr46         | 1  | 0 | 0 | 0 |
| Vps52         | 4  | 0 | 0 | 0 |
| H2-Oa         | 1  | 0 | 0 | 0 |
| H2-DMb2       | 3  | 0 | 0 | 0 |
| H2-DMb1       | 1  | 0 | 0 | 0 |
| Tap1          | 2  | 0 | 0 | 0 |
| Psmb8         | 3  | 0 | 0 | 0 |
| Tap2          | 2  | 0 | 0 | 0 |
| H2-Ab1        | 1  | 0 | 0 | 0 |
| H2-Eb1        | 1  | 0 | 0 | 0 |
| BC051142      | 8  | 0 | 0 | 0 |
| IAP           | 5  | 0 | 0 | 0 |
| Ager          | 5  | 0 | 0 | 0 |
| Pbx2          | 1  | 0 | 0 | 0 |
| Agpat1        | 1  | 0 | 0 | 0 |
| Prmt1         | 6  | 0 | 0 | 0 |
| Fkbp1         | 2  | 0 | 0 | 0 |
| Atf6b         | 1  | 0 | 0 | 0 |
| Rdbp          | 5  | 0 | 0 | 0 |
| Ehmt2         | 6  | 0 | 0 | 0 |
| Neu1          | 2  | 0 | 0 | 0 |
| Lsm2          | 2  | 0 | 0 | 0 |
| Vars          | 7  | 0 | 0 | 0 |
| D17H6S56E-3   | 9  | 0 | 0 | 0 |
| Ddah2         | 4  | 0 | 0 | 0 |
| D17H6S53E     | 2  | 0 | 0 | 0 |
| Bat3          | 15 | 0 | 0 | 0 |
| Bat1a         | 6  | 0 | 0 | 0 |
| H2-D1         | 3  | 0 | 0 | 0 |
| Ier3          | 1  | 0 | 0 | 0 |
| Flot1         | 2  | 0 | 0 | 0 |
| Mdc1          | 4  | 0 | 0 | 0 |
| 2310014H01Rik | 2  | 0 | 0 | 0 |
| Dhx16         | 4  | 0 | 0 | 0 |
| Ppp1r10       | 3  | 0 | 0 | 0 |
| Gnl1          | 3  | 0 | 0 | 0 |
| H2-M11        | 2  | 0 | 0 | 0 |
| Trim26        | 3  | 0 | 0 | 0 |
| Znrd1as       | 3  | 0 | 0 | 0 |
| Zfp57         | 3  | 0 | 0 | 0 |
| Gabbr1        | 6  | 0 | 0 | 0 |
| H2-M3         | 2  | 0 | 0 | 0 |
| Mut           | 2  | 0 | 0 | 0 |
| 3110082D06Rik | 3  | 0 | 0 | 0 |
| Tnfrsf21      | 2  | 0 | 0 | 0 |
| Gpr116        | 6  | 0 | 0 | 0 |

|               |   |   |   |   |
|---------------|---|---|---|---|
| Pla2g7        | 7 | 0 | 0 | 0 |
| Cyp39a1       | 3 | 0 | 0 | 0 |
| Rcan2         | 4 | 0 | 0 | 0 |
| Enpp5         | 4 | 0 | 0 | 0 |
| Clic5         | 4 | 0 | 0 | 0 |
| Supt3h        | 1 | 0 | 0 | 0 |
| AK046225      | 1 | 0 | 0 | 0 |
| Aars2         | 3 | 0 | 0 | 0 |
| Mrps18a       | 2 | 0 | 0 | 0 |
| Gtpbp2        | 5 | 0 | 0 | 0 |
| Xpo5          | 1 | 0 | 0 | 0 |
| Yipf3         | 1 | 0 | 0 | 0 |
| Gm88          | 3 | 0 | 0 | 0 |
| XLOC_014063   | 2 | 0 | 0 | 0 |
| Zfp318        | 4 | 0 | 0 | 0 |
| Crip3         | 7 | 0 | 0 | 0 |
| BC048355      | 2 | 0 | 0 | 0 |
| XLOC_014068   | 1 | 0 | 0 | 0 |
| Mrpl2         | 3 | 0 | 0 | 0 |
| Cul7          | 1 | 0 | 0 | 0 |
| Mea1          | 3 | 0 | 0 | 0 |
| Pex6          | 4 | 0 | 0 | 0 |
| 2310039H08Rik | 1 | 0 | 0 | 0 |
| Mrps10        | 8 | 0 | 0 | 0 |
| AI661453      | 1 | 0 | 0 | 0 |
| Ccnd3         | 1 | 0 | 0 | 0 |
| Usp49         | 6 | 0 | 0 | 0 |
| Tcfcb         | 5 | 0 | 0 | 0 |
| AI314976      | 6 | 0 | 0 | 0 |
| Lrfr2         | 4 | 0 | 0 | 0 |
| Plcl2         | 1 | 0 | 0 | 0 |
| Gm7334        | 1 | 0 | 0 | 0 |
| Kcnh8         | 3 | 0 | 0 | 0 |
| Rab5a         | 3 | 0 | 0 | 0 |
| Kat2b         | 5 | 0 | 0 | 0 |
| XLOC_014098   | 2 | 0 | 0 | 0 |
| St6gal2       | 5 | 0 | 0 | 0 |
| Zfp959        | 8 | 0 | 0 | 0 |
| Ccdc94        | 4 | 0 | 0 | 0 |
| Shd           | 5 | 0 | 0 | 0 |
| Fsd1          | 1 | 0 | 0 | 0 |
| Mpnd          | 6 | 0 | 0 | 0 |
| Chaf1a        | 1 | 0 | 0 | 0 |
| Hdgfrp2       | 4 | 0 | 0 | 0 |
| Safb          | 6 | 0 | 0 | 0 |
| Ranbp3        | 5 | 0 | 0 | 0 |
| Ndufa11       | 3 | 0 | 0 | 0 |

|               |    |   |   |   |
|---------------|----|---|---|---|
| Dus3l         | 6  | 0 | 0 | 0 |
| XLOC_014123   | 2  | 0 | 0 | 0 |
| Clpp          | 1  | 0 | 0 | 0 |
| Alkbh7        | 3  | 0 | 0 | 0 |
| Tnfsf9        | 1  | 0 | 0 | 0 |
| Trip10        | 8  | 0 | 0 | 0 |
| Ppp4r1        | 8  | 0 | 0 | 0 |
| XLOC_014135   | 2  | 0 | 0 | 0 |
| ORF19         | 4  | 0 | 0 | 0 |
| Lama1         | 5  | 0 | 0 | 0 |
| Tmem200c      | 2  | 0 | 0 | 0 |
| Epb4.1l3      | 10 | 0 | 0 | 0 |
| Zfp161        | 3  | 0 | 0 | 0 |
| A330050F15Rik | 1  | 0 | 0 | 0 |
| Dlgap1        | 6  | 0 | 0 | 0 |
| Myom1         | 5  | 0 | 0 | 0 |
| Lpin2         | 3  | 0 | 0 | 0 |
| Wdr43         | 1  | 0 | 0 | 0 |
| Clip4         | 8  | 0 | 0 | 0 |
| Ypel5         | 4  | 0 | 0 | 0 |
| Lbh           | 3  | 0 | 0 | 0 |
| Lclat1        | 3  | 0 | 0 | 0 |
| Ehd3          | 5  | 0 | 0 | 0 |
| Spast         | 3  | 0 | 0 | 0 |
| Slc30a6       | 3  | 0 | 0 | 0 |
| Yipf4         | 2  | 0 | 0 | 0 |
| Birc6         | 9  | 0 | 0 | 0 |
| Ttc27         | 3  | 0 | 0 | 0 |
| Ltbp1         | 10 | 0 | 0 | 0 |
| Gm10093       | 1  | 0 | 0 | 0 |
| Vit           | 3  | 0 | 0 | 0 |
| Ccdc75        | 2  | 0 | 0 | 0 |
| 1110001A16Rik | 1  | 0 | 0 | 0 |
| 2410091C18Rik | 1  | 0 | 0 | 0 |
| Qpct          | 2  | 0 | 0 | 0 |
| Gemin6        | 2  | 0 | 0 | 0 |
| Arhgef33      | 4  | 0 | 0 | 0 |
| Tmem178       | 2  | 0 | 0 | 0 |
| Pkdcc         | 2  | 0 | 0 | 0 |
| Eml4          | 4  | 0 | 0 | 0 |
| XLOC_014190   | 2  | 0 | 0 | 0 |
| Mta3          | 6  | 0 | 0 | 0 |
| Plekhh2       | 7  | 0 | 0 | 0 |
| Dync2li1      | 2  | 0 | 0 | 0 |
| Prkce         | 6  | 0 | 0 | 0 |
| Epas1         | 1  | 0 | 0 | 0 |
| Socs5         | 3  | 0 | 0 | 0 |

|               |   |   |   |   |
|---------------|---|---|---|---|
| Ttc7          | 5 | 0 | 0 | 0 |
| XLOC_014206   | 2 | 0 | 0 | 0 |
| Msh2          | 4 | 0 | 0 | 0 |
| Msh6          | 3 | 0 | 0 | 0 |
| Klraq1        | 2 | 0 | 0 | 0 |
| Ston1         | 7 | 0 | 0 | 0 |
| Adcyap1       | 5 | 0 | 0 | 0 |
| Gm10232       | 1 | 0 | 0 | 0 |
| AK138253      | 2 | 0 | 0 | 0 |
| Tfb1m         | 5 | 0 | 0 | 0 |
| 5730437N04Rik | 1 | 0 | 0 | 0 |
| Serac1        | 5 | 0 | 0 | 0 |
| Tmem181b      | 3 | 0 | 0 | 0 |
| BC049966      | 8 | 0 | 0 | 0 |
| AK178082      | 4 | 0 | 0 | 0 |
| Dynlt1e       | 3 | 0 | 0 | 0 |
| Ezr           | 2 | 0 | 0 | 0 |
| Rsph3b        | 2 | 0 | 0 | 0 |
| Tagap1        | 2 | 0 | 0 | 0 |
| Fndc1         | 6 | 0 | 0 | 0 |
| Gm1604b       | 1 | 0 | 0 | 0 |
| Rnaset2a      | 3 | 0 | 0 | 0 |
| AK015714      | 2 | 0 | 0 | 0 |
| Qk            | 8 | 0 | 0 | 0 |
| Pacrg         | 3 | 0 | 0 | 0 |
| Map3k4        | 7 | 0 | 0 | 0 |
| Slc22a3       | 6 | 0 | 0 | 0 |
| Igf2r         | 5 | 0 | 0 | 0 |
| Pnlnc1        | 5 | 0 | 0 | 0 |
| Acat2         | 3 | 0 | 0 | 0 |
| Wtap          | 8 | 0 | 0 | 0 |
| Tcte2         | 4 | 0 | 0 | 0 |
| Thbs2         | 2 | 0 | 0 | 0 |
| Wdr27         | 6 | 0 | 0 | 0 |
| AK004434      | 3 | 0 | 0 | 0 |
| Phf10         | 5 | 0 | 0 | 0 |
| Psmc1         | 4 | 0 | 0 | 0 |
| XLOC_014270   | 1 | 0 | 0 | 0 |
| Rgmb          | 4 | 0 | 0 | 0 |
| XLOC_014286   | 1 | 0 | 0 | 0 |
| Zfp945        | 5 | 0 | 0 | 0 |
| Zfp40         | 5 | 0 | 0 | 0 |
| Zfp213        | 2 | 0 | 0 | 0 |
| Zfp13         | 5 | 0 | 0 | 0 |
| Mmp25         | 9 | 0 | 0 | 0 |
| Thoc6         | 6 | 0 | 0 | 0 |
| AK047830      | 3 | 0 | 0 | 0 |

|               |    |   |   |   |
|---------------|----|---|---|---|
| Paqr4         | 3  | 0 | 0 | 0 |
| Flywch1       | 6  | 0 | 0 | 0 |
| Flywch2       | 1  | 0 | 0 | 0 |
| Tceb2         | 2  | 0 | 0 | 0 |
| Pdpk1         | 2  | 0 | 0 | 0 |
| Atp6v0c       | 3  | 0 | 0 | 0 |
| 1600002H07Rik | 2  | 0 | 0 | 0 |
| Ccnf          | 3  | 0 | 0 | 0 |
| E4f1          | 7  | 0 | 0 | 0 |
| Mlst8         | 4  | 0 | 0 | 0 |
| Traf7         | 4  | 0 | 0 | 0 |
| Tsc2          | 7  | 0 | 0 | 0 |
| Slc9a3r2      | 7  | 0 | 0 | 0 |
| Syng3         | 1  | 0 | 0 | 0 |
| Gfer          | 1  | 0 | 0 | 0 |
| Tbl3          | 7  | 0 | 0 | 0 |
| Ndufb10       | 1  | 0 | 0 | 0 |
| Mapk8ip3      | 10 | 0 | 0 | 0 |
| Hn1l          | 1  | 0 | 0 | 0 |
| Tmem204       | 1  | 0 | 0 | 0 |
| Telo2         | 2  | 0 | 0 | 0 |
| Gnptg         | 4  | 0 | 0 | 0 |
| Ube2i         | 5  | 0 | 0 | 0 |
| Cacna1h       | 9  | 0 | 0 | 0 |
| Sox8          | 5  | 0 | 0 | 0 |
| Chtf18        | 3  | 0 | 0 | 0 |
| Haghl         | 4  | 0 | 0 | 0 |
| Stub1         | 4  | 0 | 0 | 0 |
| Wdr90         | 7  | 0 | 0 | 0 |
| Fam195a       | 4  | 0 | 0 | 0 |
| Wfikkn1       | 1  | 0 | 0 | 0 |
| Rab40c        | 3  | 0 | 0 | 0 |
| Pigq          | 4  | 0 | 0 | 0 |
| Rab11fip3     | 3  | 0 | 0 | 0 |
| Decr2         | 5  | 0 | 0 | 0 |
| Itfg3         | 10 | 0 | 0 | 0 |
| Dusp1         | 2  | 0 | 0 | 0 |
| Cuta          | 4  | 0 | 0 | 0 |
| Lemd2         | 5  | 0 | 0 | 0 |
| AK038843      | 1  | 0 | 0 | 0 |
| Grm4          | 4  | 0 | 0 | 0 |
| AI413582      | 1  | 0 | 0 | 0 |
| Nudt3         | 10 | 0 | 0 | 0 |
| Spdef         | 1  | 0 | 0 | 0 |
| D17Wsu92e     | 4  | 0 | 0 | 0 |
| Taf11         | 4  | 0 | 0 | 0 |
| 4930526A20Rik | 1  | 0 | 0 | 0 |

|               |       |   |   |   |
|---------------|-------|---|---|---|
| Srpk1         | 2     | 0 | 0 | 0 |
| XLOC_014361   | 3     | 0 | 0 | 0 |
| Slc26a8       | 10    | 0 | 0 | 0 |
| Stk38         | 10    | 0 | 0 | 0 |
| LOC100499420  | 1     | 0 | 0 | 0 |
| Cpne5         | 7     | 0 | 0 | 0 |
| Ppil1         | 1     | 0 | 0 | 0 |
| Mtch1         | 8     | 0 | 0 | 0 |
| 1110021J02Rik | 3     | 0 | 0 | 0 |
| Mdga1         | 6     | 0 | 0 | 0 |
| Btbd9         | 9     | 0 | 0 | 0 |
| Glo1          | 4     | 0 | 0 | 0 |
| Cbs           | 2     | 0 | 0 | 0 |
| U2af1         | 6     | 0 | 0 | 0 |
| Sik1          | 2     | 0 | 0 | 0 |
| Hsf2bp        | 2     | 0 | 0 | 0 |
| Wiz           | 10    | 0 | 0 | 0 |
| Rasal3        | 7     | 0 | 0 | 0 |
| Zfp871        | 3     | 0 | 0 | 0 |
| Zfp811        | 3     | 0 | 0 | 0 |
| Zfp799        | 1     | 0 | 0 | 0 |
| XLOC_014389   | 1     | 0 | 0 | 0 |
| Cyp4f14       | 2     | 0 | 0 | 0 |
| Cyp4f13       | 7     | 0 | 0 | 0 |
| Zfp763        | 1     | 0 | 0 | 0 |
| Morc2b        | 1     | 0 | 0 | 0 |
| Zfp955a       | 1     | 0 | 0 | 0 |
| Zfp81         | 5     | 0 | 0 | 0 |
| Hnrnpm        | 6     | 0 | 0 | 0 |
|               | 41700 | 2 | 0 | 0 |
| Angptl4       | 4     | 0 | 0 | 0 |
| Kifc1         | 1     | 0 | 0 | 0 |
| AK136742      | 3     | 0 | 0 | 0 |
| H2-Ke2        | 1     | 0 | 0 | 0 |
| B3galt4       | 1     | 0 | 0 | 0 |
| Ring1         | 4     | 0 | 0 | 0 |
| Brd2          | 8     | 0 | 0 | 0 |
| H2-Aa         | 1     | 0 | 0 | 0 |
| Btnl5         | 4     | 0 | 0 | 0 |
| Rnf5          | 2     | 0 | 0 | 0 |
| Egfl8         | 5     | 0 | 0 | 0 |
| Ppt2          | 3     | 0 | 0 | 0 |
| C4b           | 5     | 0 | 0 | 0 |
| Skiv2l        | 9     | 0 | 0 | 0 |
| 1110038B12Rik | 2     | 0 | 0 | 0 |
| Ly6g6d        | 2     | 0 | 0 | 0 |
| Csnk2b        | 4     | 0 | 0 | 0 |

|               |    |   |   |   |
|---------------|----|---|---|---|
| Prrc2a        | 7  | 0 | 0 | 0 |
| Nfkbil1       | 2  | 0 | 0 | 0 |
| Tcf19         | 2  | 0 | 0 | 0 |
| Ddr1          | 7  | 0 | 0 | 0 |
| Tubb5         | 3  | 0 | 0 | 0 |
| Atat1         | 6  | 0 | 0 | 0 |
| Mrps18b       | 3  | 0 | 0 | 0 |
| Prr3          | 5  | 0 | 0 | 0 |
| H2-T23        | 3  | 0 | 0 | 0 |
| H2-T9         | 3  | 0 | 0 | 0 |
| H2-T10        | 4  | 0 | 0 | 0 |
| Trim39        | 3  | 0 | 0 | 0 |
| H2-M10.2      | 1  | 0 | 0 | 0 |
| H2-M1         | 7  | 0 | 0 | 0 |
| Trim15        | 3  | 0 | 0 | 0 |
| Ppp1r11       | 5  | 0 | 0 | 0 |
| Znrd1         | 3  | 0 | 0 | 0 |
| Crisp1        | 2  | 0 | 0 | 0 |
| 9130008F23Rik | 1  | 0 | 0 | 0 |
| Cenpq         | 1  | 0 | 0 | 0 |
| Cd2ap         | 4  | 0 | 0 | 0 |
| Mep1a         | 1  | 0 | 0 | 0 |
| XLOC_014477   | 5  | 0 | 0 | 0 |
| Enpp4         | 4  | 0 | 0 | 0 |
| Cdc5l         | 9  | 0 | 0 | 0 |
| Tmem151b      | 5  | 0 | 0 | 0 |
| Hsp90ab1      | 2  | 0 | 0 | 0 |
| Gm7325        | 2  | 0 | 0 | 0 |
| Tmem63b       | 9  | 0 | 0 | 0 |
| Vegfa         | 4  | 0 | 0 | 0 |
| Rsph9         | 1  | 0 | 0 | 0 |
| Mad2l1bp      | 2  | 0 | 0 | 0 |
| Polh          | 2  | 0 | 0 | 0 |
| Polr1c        | 1  | 0 | 0 | 0 |
| Tjap1         | 10 | 0 | 0 | 0 |
| Abcc10        | 8  | 0 | 0 | 0 |
| Ttbk1         | 3  | 0 | 0 | 0 |
| Cul9          | 2  | 0 | 0 | 0 |
| Srf           | 3  | 0 | 0 | 0 |
| Ptk7          | 5  | 0 | 0 | 0 |
| Klc4          | 6  | 0 | 0 | 0 |
| Ppp2r5d       | 1  | 0 | 0 | 0 |
| Cnpy3         | 3  | 0 | 0 | 0 |
| Rpl7l1        | 1  | 0 | 0 | 0 |
| BC032203      | 4  | 0 | 0 | 0 |
| Ubr2          | 9  | 0 | 0 | 0 |
| Taf8          | 2  | 0 | 0 | 0 |



|               |    |   |   |   |
|---------------|----|---|---|---|
| Bysl          | 1  | 0 | 0 | 0 |
| XLOC_014517   | 1  | 0 | 0 | 0 |
| Prickle4      | 4  | 0 | 0 | 0 |
| Mdfi          | 2  | 0 | 0 | 0 |
| Foxp4         | 13 | 0 | 0 | 0 |
| Nfya          | 6  | 0 | 0 | 0 |
| Apobec2       | 1  | 0 | 0 | 0 |
| Daam2         | 8  | 0 | 0 | 0 |
| Rftn1         | 5  | 0 | 0 | 0 |
| Tbc1d5        | 5  | 0 | 0 | 0 |
| Satb1         | 8  | 0 | 0 | 0 |
| Mrps36-ps1    | 1  | 0 | 0 | 0 |
| Sh3gl1        | 1  | 0 | 0 | 0 |
| Ubxn6         | 2  | 0 | 0 | 0 |
| Lrg1          | 1  | 0 | 0 | 0 |
| D17Wsu104e    | 1  | 0 | 0 | 0 |
| Dpp9          | 4  | 0 | 0 | 0 |
| Ticam1        | 1  | 0 | 0 | 0 |
| Plin3         | 2  | 0 | 0 | 0 |
| Ptpns         | 8  | 0 | 0 | 0 |
| Safb2         | 5  | 0 | 0 | 0 |
| 2410015M20Rik | 1  | 0 | 0 | 0 |
| Lonp1         | 3  | 0 | 0 | 0 |
| Vmac          | 1  | 0 | 0 | 0 |
| Nrtn          | 1  | 0 | 0 | 0 |
| Rfx2          | 7  | 0 | 0 | 0 |
| Mllt1         | 2  | 0 | 0 | 0 |
| Khsrp         | 5  | 0 | 0 | 0 |
| Slc25a23      | 5  | 0 | 0 | 0 |
| Tubb4         | 1  | 0 | 0 | 0 |
| Gm11110       | 3  | 0 | 0 | 0 |
| C3            | 4  | 0 | 0 | 0 |
| Gpr108        | 7  | 0 | 0 | 0 |
| 2610034M16Rik | 1  | 0 | 0 | 0 |
| Nudt12        | 2  | 0 | 0 | 0 |
| Efna5         | 6  | 0 | 0 | 0 |
| Pja2          | 2  | 0 | 0 | 0 |
| Tmem232       | 1  | 0 | 0 | 0 |
| Vapa          | 5  | 0 | 0 | 0 |
| Rab31         | 4  | 0 | 0 | 0 |
| Ralbp1        | 3  | 0 | 0 | 0 |
| Twsg1         | 2  | 0 | 0 | 0 |
| Ankrd12       | 3  | 0 | 0 | 0 |
| Ndufv2        | 3  | 0 | 0 | 0 |
| XLOC_014582   | 3  | 0 | 0 | 0 |
| Gm10495       | 1  | 0 | 0 | 0 |
| Rab12         | 2  | 0 | 0 | 0 |

|               |    |   |   |   |
|---------------|----|---|---|---|
| Ptprm         | 6  | 0 | 0 | 0 |
| Arhgap28      | 9  | 0 | 0 | 0 |
| Myl12b        | 3  | 0 | 0 | 0 |
| Smchd1        | 5  | 0 | 0 | 0 |
| Trmt61b       | 2  | 0 | 0 | 0 |
| XLOC_014604   | 2  | 0 | 0 | 0 |
| Xdh           | 4  | 0 | 0 | 0 |
| Memo1         | 8  | 0 | 0 | 0 |
| Dpy30         | 3  | 0 | 0 | 0 |
| Fam98a        | 1  | 0 | 0 | 0 |
| Fez2          | 3  | 0 | 0 | 0 |
| Strn          | 2  | 0 | 0 | 0 |
| Heatr5b       | 2  | 0 | 0 | 0 |
| Cebpz         | 3  | 0 | 0 | 0 |
| Prkd3         | 1  | 0 | 0 | 0 |
| Cdc42ep3      | 1  | 0 | 0 | 0 |
| Hnrpll        | 3  | 0 | 0 | 0 |
| Srsf7         | 2  | 0 | 0 | 0 |
| Dhx57         | 9  | 0 | 0 | 0 |
| Sos1          | 3  | 0 | 0 | 0 |
| Map4k3        | 10 | 0 | 0 | 0 |
| Thumpd2       | 5  | 0 | 0 | 0 |
| Cox7a2l       | 2  | 0 | 0 | 0 |
| XLOC_014639   | 6  | 0 | 0 | 0 |
| Lrpprc        | 7  | 0 | 0 | 0 |
| 1110020A21Rik | 1  | 0 | 0 | 0 |
| Prepl         | 2  | 0 | 0 | 0 |
| Six2          | 1  | 0 | 0 | 0 |
| Mcfd2         | 2  | 0 | 0 | 0 |
| XLOC_014658   | 2  | 0 | 0 | 0 |
| Fbxo11        | 5  | 0 | 0 | 0 |
| Nrxn1         | 14 | 0 | 0 | 0 |
| Mettl4        | 3  | 0 | 0 | 0 |
| Tiam2         | 6  | 0 | 0 | 0 |
| XLOC_013766   | 1  | 0 | 0 | 0 |
| 1600012H06Rik | 1  | 0 | 0 | 0 |
| 2210404J11Rik | 2  | 0 | 0 | 0 |
| Tbp           | 6  | 0 | 0 | 0 |
| Zfp53         | 2  | 0 | 0 | 0 |
| KRAZ1         | 2  | 0 | 0 | 0 |
| Zfp52         | 1  | 0 | 0 | 0 |
| 3110052M02Rik | 3  | 0 | 0 | 0 |
| Zfp760        | 5  | 0 | 0 | 0 |
| XLOC_013840   | 1  | 0 | 0 | 0 |
| mKIAA1306     | 3  | 0 | 0 | 0 |
| Pkd1          | 6  | 0 | 0 | 0 |
| Spsb3         | 1  | 0 | 0 | 0 |

|               |   |   |   |   |
|---------------|---|---|---|---|
| 0610007P22Rik | 2 | 0 | 0 | 0 |
| Gng13         | 1 | 0 | 0 | 0 |
| Bnip1         | 1 | 0 | 0 | 0 |
| Snrpc         | 5 | 0 | 0 | 0 |
| XLOC_013911   | 2 | 0 | 0 | 0 |
| Brpf3         | 4 | 0 | 0 | 0 |
| AK133808      | 1 | 0 | 0 | 0 |
| H2-DMa        | 3 | 0 | 0 | 0 |
| Gpsm3         | 1 | 0 | 0 | 0 |
| Zbtb12        | 2 | 0 | 0 | 0 |
| Clic1         | 4 | 0 | 0 | 0 |
| 2410017I17Rik | 1 | 0 | 0 | 0 |
| XLOC_014026   | 1 | 0 | 0 | 0 |
| XLOC_014054   | 2 | 0 | 0 | 0 |
| Mrpl14        | 1 | 0 | 0 | 0 |
| Med20         | 1 | 0 | 0 | 0 |
| Frs3          | 2 | 0 | 0 | 0 |
| XLOC_014093   | 3 | 0 | 0 | 0 |
| AK038632      | 1 | 0 | 0 | 0 |
| Tmem146       | 8 | 0 | 0 | 0 |
| Fert2         | 7 | 0 | 0 | 0 |
| XLOC_014140   | 4 | 0 | 0 | 0 |
| C030034I22Rik | 1 | 0 | 0 | 0 |
| 1700106N22Rik | 3 | 0 | 0 | 0 |
| XLOC_014209   | 4 | 0 | 0 | 0 |
| XLOC_014230   | 1 | 0 | 0 | 0 |
| AK037830      | 3 | 0 | 0 | 0 |
| XLOC_014258   | 1 | 0 | 0 | 0 |
| AK143195      | 1 | 0 | 0 | 0 |
| Tcte3         | 1 | 0 | 0 | 0 |
| Pdcd2         | 2 | 0 | 0 | 0 |
| Zfp942        | 1 | 0 | 0 | 0 |
| XLOC_014295   | 1 | 0 | 0 | 0 |
| Kremen2       | 1 | 0 | 0 | 0 |
| Amdhd2        | 3 | 0 | 0 | 0 |
| Nubp2         | 3 | 0 | 0 | 0 |
| Rhbd11        | 3 | 0 | 0 | 0 |
| Solh          | 7 | 0 | 0 | 0 |
| Nme4          | 2 | 0 | 0 | 0 |
| Pdia2         | 5 | 0 | 0 | 0 |
| AK036033      | 3 | 0 | 0 | 0 |
| Tcp11         | 2 | 0 | 0 | 0 |
| Tead3         | 5 | 0 | 0 | 0 |
| Wdr4          | 6 | 0 | 0 | 0 |
| Rab11b        | 7 | 0 | 0 | 0 |
| Rps18         | 3 | 0 | 0 | 0 |
| H2-Ke6        | 7 | 0 | 0 | 0 |

|               |   |   |   |   |
|---------------|---|---|---|---|
| Psmb9         | 3 | 0 | 0 | 0 |
| Stk19         | 3 | 0 | 0 | 0 |
| Gtf2h4        | 1 | 0 | 0 | 0 |
| 2310061I04Rik | 3 | 0 | 0 | 0 |
| H2-T24        | 1 | 0 | 0 | 0 |
| Gnmt          | 3 | 0 | 0 | 0 |
| A330017A19Rik | 1 | 0 | 0 | 0 |
| XLOC_014583   | 1 | 0 | 0 | 0 |
| Alk           | 5 | 0 | 0 | 0 |
| Galnt14       | 5 | 0 | 0 | 0 |
| AK144664      | 1 | 0 | 0 | 0 |
| XLOC_014636   | 1 | 0 | 0 | 0 |
| XLOC_014640   | 1 | 0 | 0 | 0 |
| XLOC_014641   | 1 | 0 | 0 | 0 |
| XLOC_014653   | 2 | 0 | 0 | 0 |
| Lhcgr         | 8 | 0 | 0 | 0 |
| T2            | 2 | 0 | 0 | 0 |
| AK029100      | 2 | 0 | 0 | 0 |
| XLOC_013824   | 1 | 0 | 0 | 0 |
| Zfp758        | 1 | 0 | 0 | 0 |
| AK079285      | 1 | 0 | 0 | 0 |
| Mslnl         | 4 | 0 | 0 | 0 |
| XLOC_013907   | 1 | 0 | 0 | 0 |
| XLOC_013933   | 1 | 0 | 0 | 0 |
| Dnahc8        | 2 | 0 | 0 | 0 |
| BC048393      | 1 | 0 | 0 | 0 |
| Cyp4f15       | 2 | 0 | 0 | 0 |
| Notch4        | 1 | 0 | 0 | 0 |
| Dom3z         | 1 | 0 | 0 | 0 |
| XLOC_013989   | 1 | 0 | 0 | 0 |
| Ltb           | 2 | 0 | 0 | 0 |
| Gm6034        | 1 | 0 | 0 | 0 |
| 3110082D06Rik | 3 | 0 | 0 | 0 |
| B230354K17Rik | 1 | 0 | 0 | 0 |
| AK080425      | 2 | 0 | 0 | 0 |
| XLOC_014072   | 1 | 0 | 0 | 0 |
| XLOC_014082   | 1 | 0 | 0 | 0 |
| XLOC_014088   | 1 | 0 | 0 | 0 |
| Kif6          | 1 | 0 | 0 | 0 |
| Ebi3          | 3 | 0 | 0 | 0 |
| XLOC_014134   | 1 | 0 | 0 | 0 |
| XLOC_014144   | 1 | 0 | 0 | 0 |
| XLOC_014203   | 1 | 0 | 0 | 0 |
| BC068229      | 2 | 0 | 0 | 0 |
| Lnpep         | 3 | 0 | 0 | 0 |
| Gm4769        | 2 | 0 | 0 | 0 |
| Dnase1l2      | 1 | 0 | 0 | 0 |

|               |   |   |   |   |
|---------------|---|---|---|---|
| AK014798      | 1 | 0 | 0 | 0 |
| Cramp1l       | 5 | 0 | 0 | 0 |
| 2900010M23Rik | 1 | 0 | 0 | 0 |
| XLOC_014368   | 3 | 0 | 0 | 0 |
| Btnl6         | 6 | 0 | 0 | 0 |
| C4a           | 2 | 0 | 0 | 0 |
| D17H6S56E-5   | 1 | 0 | 0 | 0 |
| Msh5          | 3 | 0 | 0 | 0 |
| Lst1          | 1 | 0 | 0 | 0 |
| H2-M5         | 2 | 0 | 0 | 0 |
| AK132380      | 1 | 0 | 0 | 0 |
| Slc25a27      | 4 | 0 | 0 | 0 |
| XLOC_014524   | 4 | 0 | 0 | 0 |
| Zfp119        | 3 | 0 | 0 | 0 |
| Stap2         | 4 | 0 | 0 | 0 |
| XLOC_014584   | 1 | 0 | 0 | 0 |
| XLOC_014592   | 1 | 0 | 0 | 0 |
| Emilin2       | 2 | 0 | 0 | 0 |
| Ndc80         | 3 | 0 | 0 | 0 |
| XLOC_014635   | 1 | 0 | 0 | 0 |
| XLOC_014637   | 1 | 0 | 0 | 0 |
| Kcng3         | 2 | 0 | 0 | 0 |
| Calm2         | 1 | 0 | 0 | 0 |
| XLOC_014665   | 2 | 0 | 0 | 0 |
| 2610044O15Rik | 4 | 0 | 0 | 0 |
| Zfp960        | 1 | 0 | 0 | 0 |
| Fpr2          | 1 | 0 | 0 | 0 |
| Zfp54         | 4 | 0 | 0 | 0 |
| Zfp51         | 1 | 0 | 0 | 0 |
| Zfp229        | 1 | 0 | 0 | 0 |
| XLOC_013842   | 1 | 0 | 0 | 0 |
| Hmga1         | 1 | 0 | 0 | 0 |
| XLOC_013965   | 2 | 0 | 0 | 0 |
| Trim10        | 3 | 0 | 0 | 0 |
| Gm7148        | 1 | 0 | 0 | 0 |
| XLOC_014065   | 1 | 0 | 0 | 0 |
| Mocs1         | 1 | 0 | 0 | 0 |
| Crb3          | 1 | 0 | 0 | 0 |
| XLOC_014132   | 1 | 0 | 0 | 0 |
| Man2a1        | 2 | 0 | 0 | 0 |
| 1700090G07Rik | 4 | 0 | 0 | 0 |
| XLOC_014214   | 1 | 0 | 0 | 0 |
| XLOC_014287   | 1 | 0 | 0 | 0 |
| XLOC_014288   | 1 | 0 | 0 | 0 |
| D330041H03Rik | 1 | 0 | 0 | 0 |
| Ephx3         | 3 | 0 | 0 | 0 |
| H2-T22        | 1 | 0 | 0 | 0 |

|               |   |   |   |   |
|---------------|---|---|---|---|
| Tdrd6         | 1 | 0 | 0 | 0 |
| Ptcra         | 3 | 0 | 0 | 0 |
| XLOC_014550   | 2 | 0 | 0 | 0 |
| XLOC_014605   | 1 | 0 | 0 | 0 |
| Thada         | 1 | 0 | 0 | 0 |
| XLOC_014662   | 1 | 0 | 0 | 0 |
| XLOC_013808   | 1 | 0 | 0 | 0 |
| XLOC_013834   | 1 | 0 | 0 | 0 |
| XLOC_013841   | 1 | 0 | 0 | 0 |
| Ccdc64b       | 1 | 0 | 0 | 0 |
| Neurl1b       | 1 | 0 | 0 | 0 |
| Cyp4f17       | 1 | 0 | 0 | 0 |
| XLOC_013982   | 1 | 0 | 0 | 0 |
| Hspa1l        | 1 | 0 | 0 | 0 |
| Gpank1        | 4 | 0 | 0 | 0 |
| Rnf39         | 1 | 0 | 0 | 0 |
| Uhrf1         | 2 | 0 | 0 | 0 |
| XLOC_014115   | 1 | 0 | 0 | 0 |
| Morn2         | 1 | 0 | 0 | 0 |
| XLOC_014247   | 1 | 0 | 0 | 0 |
| Has1          | 1 | 0 | 0 | 0 |
| Fpr1          | 1 | 0 | 0 | 0 |
| Cyp4f41-ps    | 1 | 0 | 0 | 0 |
| Zfp422-rs1    | 1 | 0 | 0 | 0 |
| Rpp21         | 1 | 0 | 0 | 0 |
| XLOC_014466   | 1 | 0 | 0 | 0 |
| XLOC_014482   | 2 | 0 | 0 | 0 |
| AK044644      | 1 | 0 | 0 | 0 |
| Sfrs7         | 2 | 0 | 0 | 0 |
| XLOC_013790   | 1 | 0 | 0 | 0 |
| BC002059      | 1 | 0 | 0 | 0 |
| XLOC_013910   | 1 | 0 | 0 | 0 |
| XLOC_013921   | 1 | 0 | 0 | 0 |
| XLOC_014028   | 1 | 0 | 0 | 0 |
| RP23-98F21.10 | 1 | 0 | 0 | 0 |
| Guca1b        | 1 | 0 | 0 | 0 |
| Trem1         | 1 | 0 | 0 | 0 |
| mKIAA0007     | 1 | 0 | 0 | 0 |
| XLOC_014188   | 1 | 0 | 0 | 0 |
| XLOC_014189   | 1 | 0 | 0 | 0 |
| Mas1          | 1 | 0 | 0 | 0 |
| Dll1          | 1 | 0 | 0 | 0 |
| Rab26         | 1 | 0 | 0 | 0 |
| XLOC_014494   | 1 | 0 | 0 | 0 |
| AK135560      | 1 | 0 | 0 | 0 |
| XLOC_014651   | 1 | 0 | 0 | 0 |
| Cul2          | 3 | 0 | 0 | 0 |

|               |   |   |   |   |
|---------------|---|---|---|---|
| Bambi         | 2 | 0 | 0 | 0 |
| AK014726      | 3 | 0 | 0 | 0 |
| Mtpap         | 3 | 0 | 0 | 0 |
| 9430020K01Rik | 1 | 0 | 0 | 0 |
| Zeb1          | 5 | 0 | 0 | 0 |
| Rab18         | 3 | 0 | 0 | 0 |
| XLOC_015608   | 2 | 0 | 0 | 0 |
| Wac           | 5 | 0 | 0 | 0 |
| Snrpd1        | 2 | 0 | 0 | 0 |
| Rbbp8         | 8 | 0 | 0 | 0 |
| XLOC_015615   | 2 | 0 | 0 | 0 |
| Cables1       | 5 | 0 | 0 | 0 |
| XLOC_015618   | 1 | 0 | 0 | 0 |
| Riok3         | 6 | 0 | 0 | 0 |
| 3110002H16Rik | 4 | 0 | 0 | 0 |
| Ttc39c        | 5 | 0 | 0 | 0 |
| Cabyr         | 5 | 0 | 0 | 0 |
| Impact        | 3 | 0 | 0 | 0 |
| XLOC_015626   | 2 | 0 | 0 | 0 |
| Taf4b         | 2 | 0 | 0 | 0 |
| Gm4835        | 3 | 0 | 0 | 0 |
| Dsg1b         | 1 | 0 | 0 | 0 |
| Ttr           | 1 | 0 | 0 | 0 |
| Asxl3         | 3 | 0 | 0 | 0 |
| Dtna          | 7 | 0 | 0 | 0 |
| Mapre2        | 2 | 0 | 0 | 0 |
| Zfp397        | 4 | 0 | 0 | 0 |
| 2700062C07Rik | 7 | 0 | 0 | 0 |
| Elp2          | 4 | 0 | 0 | 0 |
| Mocos         | 6 | 0 | 0 | 0 |
| Pik3c3        | 2 | 0 | 0 | 0 |
| XLOC_015653   | 2 | 0 | 0 | 0 |
| Sap130        | 5 | 0 | 0 | 0 |
| Ammecr1l      | 5 | 0 | 0 | 0 |
| Polr2d        | 1 | 0 | 0 | 0 |
| Iws1          | 4 | 0 | 0 | 0 |
| Ercc3         | 2 | 0 | 0 | 0 |
| Bin1          | 8 | 0 | 0 | 0 |
| Wdr36         | 4 | 0 | 0 | 0 |
| AK010403      | 1 | 0 | 0 | 0 |
| Apc           | 6 | 0 | 0 | 0 |
| Srp19         | 1 | 0 | 0 | 0 |
| Fam53c        | 8 | 0 | 0 | 0 |
| Kdm3b         | 3 | 0 | 0 | 0 |
| Reep2         | 2 | 0 | 0 | 0 |
| Ctnna1        | 7 | 0 | 0 | 0 |
| Matr3         | 5 | 0 | 0 | 0 |

|               |   |   |   |   |
|---------------|---|---|---|---|
| Ube2d2        | 5 | 0 | 0 | 0 |
| Cxxc5         | 5 | 0 | 0 | 0 |
| 0610010012Rik | 8 | 0 | 0 | 0 |
| Tmco6         | 2 | 0 | 0 | 0 |
| Ik            | 5 | 0 | 0 | 0 |
| Wdr55         | 2 | 0 | 0 | 0 |
| Hars2         | 1 | 0 | 0 | 0 |
| Zmat2         | 1 | 0 | 0 | 0 |
| Pcdha2        | 4 | 0 | 0 | 0 |
| Pcdhb4        | 1 | 0 | 0 | 0 |
| Pcdhb5        | 1 | 0 | 0 | 0 |
| Pcdhb7        | 1 | 0 | 0 | 0 |
| Pcdhb9        | 1 | 0 | 0 | 0 |
| Pcdhb10       | 1 | 0 | 0 | 0 |
| Pcdhb12       | 1 | 0 | 0 | 0 |
| Pcdhb13       | 1 | 0 | 0 | 0 |
| Pcdhb15       | 1 | 0 | 0 | 0 |
| Pcdhga3       | 1 | 0 | 0 | 0 |
| Pcdhgc3       | 1 | 0 | 0 | 0 |
| Rel2          | 1 | 0 | 0 | 0 |
| XLOC_015708   | 5 | 0 | 0 | 0 |
| XLOC_015709   | 6 | 0 | 0 | 0 |
| 0610009020Rik | 8 | 0 | 0 | 0 |
| XLOC_015713   | 1 | 0 | 0 | 0 |
| Rnf14         | 4 | 0 | 0 | 0 |
| XLOC_015714   | 2 | 0 | 0 | 0 |
| Ndfip1        | 3 | 0 | 0 | 0 |
| Arhgap26      | 5 | 0 | 0 | 0 |
| mKIAA1317     | 5 | 0 | 0 | 0 |
| Kctd16        | 1 | 0 | 0 | 0 |
| Rbm27         | 4 | 0 | 0 | 0 |
| Pou4f3        | 2 | 0 | 0 | 0 |
| Tcerg1        | 5 | 0 | 0 | 0 |
| Stk32a        | 3 | 0 | 0 | 0 |
| Dcp2          | 2 | 0 | 0 | 0 |
| Ythdc2        | 5 | 0 | 0 | 0 |
| Kcnn2         | 5 | 0 | 0 | 0 |
| Ap3s1         | 6 | 0 | 0 | 0 |
| Commd10       | 4 | 0 | 0 | 0 |
| Dmxl1         | 8 | 0 | 0 | 0 |
| Hsd17b4       | 1 | 0 | 0 | 0 |
| Cd63-ps       | 1 | 0 | 0 | 0 |
| Prr16         | 3 | 0 | 0 | 0 |
| Srfbp1        | 1 | 0 | 0 | 0 |
| Sncaip        | 2 | 0 | 0 | 0 |
| Snx24         | 1 | 0 | 0 | 0 |
| Csnk1g3       | 7 | 0 | 0 | 0 |



|               |    |   |   |   |
|---------------|----|---|---|---|
| AK036466      | 4  | 0 | 0 | 0 |
| XLOC_015755   | 2  | 0 | 0 | 0 |
| Gramd3        | 2  | 0 | 0 | 0 |
| Phax          | 2  | 0 | 0 | 0 |
| Lmnb1         | 2  | 0 | 0 | 0 |
| Prrc1         | 2  | 0 | 0 | 0 |
| Ctxn3         | 8  | 0 | 0 | 0 |
| Gm17593       | 1  | 0 | 0 | 0 |
| Isoc1         | 3  | 0 | 0 | 0 |
| A730017C20Rik | 7  | 0 | 0 | 0 |
| Chsy3         | 3  | 0 | 0 | 0 |
| Iigp1         | 3  | 0 | 0 | 0 |
| Dctn4         | 1  | 0 | 0 | 0 |
| Rbm22         | 2  | 0 | 0 | 0 |
| Rps14         | 7  | 0 | 0 | 0 |
| Camk2a        | 4  | 0 | 0 | 0 |
| Pdgfrb        | 5  | 0 | 0 | 0 |
| Csf1r         | 4  | 0 | 0 | 0 |
| AK032118      | 1  | 0 | 0 | 0 |
| Csnk1a1       | 7  | 0 | 0 | 0 |
| AK143260      | 6  | 0 | 0 | 0 |
| 1500015A07Rik | 1  | 0 | 0 | 0 |
| Sh3tc2        | 4  | 0 | 0 | 0 |
| Htr4          | 6  | 0 | 0 | 0 |
| Spink10       | 6  | 0 | 0 | 0 |
| Apcdd1        | 2  | 0 | 0 | 0 |
| Napg          | 1  | 0 | 0 | 0 |
| Onecut2       | 2  | 0 | 0 | 0 |
| Nedd4l        | 11 | 0 | 0 | 0 |
| mKIAA1629     | 10 | 0 | 0 | 0 |
| Sec11c        | 1  | 0 | 0 | 0 |
| Pmaip1        | 2  | 0 | 0 | 0 |
| Gnal          | 5  | 0 | 0 | 0 |
| Impa2         | 2  | 0 | 0 | 0 |
| Cidea         | 1  | 0 | 0 | 0 |
| Tubb6         | 1  | 0 | 0 | 0 |
| Psmg2         | 2  | 0 | 0 | 0 |
| Cep192        | 9  | 0 | 0 | 0 |
| D18Ert653e    | 5  | 0 | 0 | 0 |
| Rnmt          | 4  | 0 | 0 | 0 |
| Tcf4          | 8  | 0 | 0 | 0 |
| Ccdc68        | 4  | 0 | 0 | 0 |
| Mbd2          | 4  | 0 | 0 | 0 |
| Mro           | 10 | 0 | 0 | 0 |
| AK036329      | 3  | 0 | 0 | 0 |
| Cxxc1         | 3  | 0 | 0 | 0 |
| Mbd1          | 6  | 0 | 0 | 0 |

|               |   |   |   |   |
|---------------|---|---|---|---|
| Acaa2         | 3 | 0 | 0 | 0 |
| BC031181      | 3 | 0 | 0 | 0 |
| Dym           | 5 | 0 | 0 | 0 |
| Smad7         | 1 | 0 | 0 | 0 |
| Zbtb7c        | 4 | 0 | 0 | 0 |
| Skor2         | 5 | 0 | 0 | 0 |
| Ier3ip1       | 1 | 0 | 0 | 0 |
| Hdhd2         | 3 | 0 | 0 | 0 |
| Atp5a1        | 6 | 0 | 0 | 0 |
| Pstpip2       | 3 | 0 | 0 | 0 |
| 5430411K18Rik | 5 | 0 | 0 | 0 |
| Pard6g        | 1 | 0 | 0 | 0 |
| Txn14a        | 3 | 0 | 0 | 0 |
| XLOC_015853   | 2 | 0 | 0 | 0 |
| Zfp516        | 6 | 0 | 0 | 0 |
| XLOC_015858   | 2 | 0 | 0 | 0 |
| Zadh2         | 3 | 0 | 0 | 0 |
| Cyb5          | 1 | 0 | 0 | 0 |
| Neto1         | 3 | 0 | 0 | 0 |
| Cbln2         | 5 | 0 | 0 | 0 |
| Tmx3          | 2 | 0 | 0 | 0 |
| Crem          | 7 | 0 | 0 | 0 |
| Map3k8        | 6 | 0 | 0 | 0 |
| cot           | 1 | 0 | 0 | 0 |
| Arhgap12      | 9 | 0 | 0 | 0 |
| Kif5b         | 7 | 0 | 0 | 0 |
| Epc1          | 4 | 0 | 0 | 0 |
| Mkx           | 3 | 0 | 0 | 0 |
| Ccny          | 1 | 0 | 0 | 0 |
| Rock1         | 8 | 0 | 0 | 0 |
| Abhd3         | 1 | 0 | 0 | 0 |
| BC030050      | 1 | 0 | 0 | 0 |
| 6030446N20Rik | 2 | 0 | 0 | 0 |
| Npc1          | 1 | 0 | 0 | 0 |
| Ankrd29       | 4 | 0 | 0 | 0 |
| Osbpl1a       | 8 | 0 | 0 | 0 |
| Zfp521        | 7 | 0 | 0 | 0 |
| Ss18          | 8 | 0 | 0 | 0 |
| Kctd1         | 4 | 0 | 0 | 0 |
| Aqp4          | 3 | 0 | 0 | 0 |
| Chst9         | 3 | 0 | 0 | 0 |
| B4galt6       | 4 | 0 | 0 | 0 |
| Trappc8       | 7 | 0 | 0 | 0 |
| Fam59a        | 4 | 0 | 0 | 0 |
| XLOC_015910   | 2 | 0 | 0 | 0 |
| Zfp397os      | 4 | 0 | 0 | 0 |
| Zfp191        | 3 | 0 | 0 | 0 |

|               |    |   |   |   |
|---------------|----|---|---|---|
| Ino80c        | 2  | 0 | 0 | 0 |
| Rprd1a        | 3  | 0 | 0 | 0 |
| Slc39a6       | 2  | 0 | 0 | 0 |
| 5730494M16Rik | 1  | 0 | 0 | 0 |
| Celf4         | 14 | 0 | 0 | 0 |
| XLOC_015919   | 2  | 0 | 0 | 0 |
| Rit2          | 2  | 0 | 0 | 0 |
| Syt4          | 6  | 0 | 0 | 0 |
| Slc25a46      | 5  | 0 | 0 | 0 |
| Gypc          | 1  | 0 | 0 | 0 |
| Stard4        | 3  | 0 | 0 | 0 |
| D0H4S114      | 2  | 0 | 0 | 0 |
| Epb4.1l4a     | 7  | 0 | 0 | 0 |
| Reep5         | 1  | 0 | 0 | 0 |
| Fam13b        | 12 | 0 | 0 | 0 |
| Nme5          | 5  | 0 | 0 | 0 |
| Cdc23         | 1  | 0 | 0 | 0 |
| Gfra3         | 4  | 0 | 0 | 0 |
| Etf1          | 1  | 0 | 0 | 0 |
| Hspa9         | 6  | 0 | 0 | 0 |
| XLOC_015948   | 2  | 0 | 0 | 0 |
| Lrrtm2        | 1  | 0 | 0 | 0 |
| Sil1          | 4  | 0 | 0 | 0 |
| Spata24       | 3  | 0 | 0 | 0 |
| Dnajc18       | 2  | 0 | 0 | 0 |
| Ecscr         | 5  | 0 | 0 | 0 |
| Nrg2          | 7  | 0 | 0 | 0 |
| Hbegf         | 1  | 0 | 0 | 0 |
| Apbb3         | 5  | 0 | 0 | 0 |
| E230025N22Rik | 1  | 0 | 0 | 0 |
| Ndufa2        | 1  | 0 | 0 | 0 |
| Taf7          | 1  | 0 | 0 | 0 |
| Hdac3         | 1  | 0 | 0 | 0 |
| Fchsd1        | 4  | 0 | 0 | 0 |
| XLOC_015982   | 1  | 0 | 0 | 0 |
| Spry4         | 3  | 0 | 0 | 0 |
| Fgf1          | 10 | 0 | 0 | 0 |
| Nr3c1         | 4  | 0 | 0 | 0 |
| Yipf5         | 2  | 0 | 0 | 0 |
| Preli2        | 6  | 0 | 0 | 0 |
| Grxcr2        | 2  | 0 | 0 | 0 |
| Lars          | 2  | 0 | 0 | 0 |
| Ppp2r2b       | 8  | 0 | 0 | 0 |
| Dpysl3        | 3  | 0 | 0 | 0 |
| Jakmip2       | 6  | 0 | 0 | 0 |
| Mcc           | 6  | 0 | 0 | 0 |
| Trim36        | 11 | 0 | 0 | 0 |

|               |       |    |   |   |   |
|---------------|-------|----|---|---|---|
| Pggt1b        |       | 3  | 0 | 0 | 0 |
| Ccdc112       |       | 2  | 0 | 0 | 0 |
| Fem1c         |       | 1  | 0 | 0 | 0 |
| Tmed7         |       | 1  | 0 | 0 | 0 |
| Cdo1          |       | 1  | 0 | 0 | 0 |
| Atg12         |       | 5  | 0 | 0 | 0 |
| Sema6a        |       | 8  | 0 | 0 | 0 |
| Ppic          |       | 2  | 0 | 0 | 0 |
| Cep120        |       | 2  | 0 | 0 | 0 |
| Aldh7a1       |       | 3  | 0 | 0 | 0 |
|               | 41701 | 2  | 0 | 0 | 0 |
| Fbn2          |       | 3  | 0 | 0 | 0 |
| 2010002N04Rik |       | 3  | 0 | 0 | 0 |
| Synpo         |       | 10 | 0 | 0 | 0 |
| Ndst1         |       | 5  | 0 | 0 | 0 |
| Hmgxb3        |       | 3  | 0 | 0 | 0 |
| Slc26a2       |       | 3  | 0 | 0 | 0 |
| Ppargc1b      |       | 3  | 0 | 0 | 0 |
| Pcyox1l       |       | 5  | 0 | 0 | 0 |
| Grpel2        |       | 4  | 0 | 0 | 0 |
| Afap1l1       |       | 2  | 0 | 0 | 0 |
| Ablim3        |       | 7  | 0 | 0 | 0 |
| Adrb2         |       | 1  | 0 | 0 | 0 |
| Fbxo38        |       | 7  | 0 | 0 | 0 |
| 2700046A07Rik |       | 1  | 0 | 0 | 0 |
| Fam38b        |       | 13 | 0 | 0 | 0 |
| Txn1l         |       | 3  | 0 | 0 | 0 |
| BC048666      |       | 1  | 0 | 0 | 0 |
| Fech          |       | 5  | 0 | 0 | 0 |
| Nars          |       | 4  | 0 | 0 | 0 |
| Lman1         |       | 3  | 0 | 0 | 0 |
| Afg3l2        |       | 5  | 0 | 0 | 0 |
| Spire1        |       | 4  | 0 | 0 | 0 |
| Ptpn2         |       | 5  | 0 | 0 | 0 |
| 4933403F05Rik |       | 1  | 0 | 0 | 0 |
| Rab27b        |       | 5  | 0 | 0 | 0 |
| 4930503L19Rik |       | 6  | 0 | 0 | 0 |
| Smad4         |       | 2  | 0 | 0 | 0 |
| Elac1         |       | 4  | 0 | 0 | 0 |
| Me2           |       | 2  | 0 | 0 | 0 |
| Mapk4         |       | 6  | 0 | 0 | 0 |
| XLOC_016067   |       | 1  | 0 | 0 | 0 |
| Gm672         |       | 12 | 0 | 0 | 0 |
| XLOC_016078   |       | 11 | 0 | 0 | 0 |
| Katnal2       |       | 9  | 0 | 0 | 0 |
| Rnf165        |       | 1  | 0 | 0 | 0 |
| 8030462N17Rik |       | 3  | 0 | 0 | 0 |

|               |    |   |   |   |
|---------------|----|---|---|---|
| A330094K24Rik | 5  | 0 | 0 | 0 |
| Slc14a1       | 4  | 0 | 0 | 0 |
| Adnp2         | 3  | 0 | 0 | 0 |
| Rbfa          | 3  | 0 | 0 | 0 |
| Hsbp1l1       | 2  | 0 | 0 | 0 |
| Kcng2         | 4  | 0 | 0 | 0 |
| Ctdp1         | 3  | 0 | 0 | 0 |
| Nfatc1        | 7  | 0 | 0 | 0 |
| Atp9b         | 13 | 0 | 0 | 0 |
| Zfp236        | 9  | 0 | 0 | 0 |
| Tshz1         | 2  | 0 | 0 | 0 |
| Cndp1         | 2  | 0 | 0 | 0 |
| Cndp2         | 2  | 0 | 0 | 0 |
| 1700034H14Rik | 6  | 0 | 0 | 0 |
| Dok6          | 3  | 0 | 0 | 0 |
| XLOC_015605   | 1  | 0 | 0 | 0 |
| Thoc1         | 3  | 0 | 0 | 0 |
| Slc4a9        | 2  | 0 | 0 | 0 |
| Pcdhac2       | 1  | 0 | 0 | 0 |
| 9630014M24Rik | 6  | 0 | 0 | 0 |
| Gm5820        | 1  | 0 | 0 | 0 |
| A930012L18Rik | 2  | 0 | 0 | 0 |
| AK163160      | 2  | 0 | 0 | 0 |
| XLOC_015756   | 4  | 0 | 0 | 0 |
| Il17b         | 1  | 0 | 0 | 0 |
| XLOC_015825   | 2  | 0 | 0 | 0 |
| Pqlc1         | 3  | 0 | 0 | 0 |
| Mbp           | 8  | 0 | 0 | 0 |
| Usp14         | 5  | 0 | 0 | 0 |
| 4933408B17Rik | 2  | 0 | 0 | 0 |
| Pfdn1         | 2  | 0 | 0 | 0 |
| Gnpda1        | 3  | 0 | 0 | 0 |
| 41701         | 2  | 0 | 0 | 0 |
| Alpk2         | 1  | 0 | 0 | 0 |
| Ska1          | 1  | 0 | 0 | 0 |
| XLOC_016077   | 1  | 0 | 0 | 0 |
| Cis4          | 3  | 0 | 0 | 0 |
| Gm7701        | 1  | 0 | 0 | 0 |
| Map3k2        | 3  | 0 | 0 | 0 |
| Pkd2l2        | 6  | 0 | 0 | 0 |
| Psd2          | 1  | 0 | 0 | 0 |
| Pura          | 3  | 0 | 0 | 0 |
| XLOC_015684   | 1  | 0 | 0 | 0 |
| XLOC_015728   | 4  | 0 | 0 | 0 |
| XLOC_015754   | 3  | 0 | 0 | 0 |
| Megf10        | 2  | 0 | 0 | 0 |
| Gm4951        | 2  | 0 | 0 | 0 |

|               |   |   |   |   |
|---------------|---|---|---|---|
| BC023105      | 1 | 0 | 0 | 0 |
| XLOC_015783   | 1 | 0 | 0 | 0 |
| XLOC_015817   | 1 | 0 | 0 | 0 |
| XLOC_015845   | 1 | 0 | 0 | 0 |
| XLOC_015856   | 1 | 0 | 0 | 0 |
| XLOC_015870   | 1 | 0 | 0 | 0 |
| XLOC_015872   | 1 | 0 | 0 | 0 |
| XLOC_015932   | 1 | 0 | 0 | 0 |
| Cdc25c        | 2 | 0 | 0 | 0 |
| Cd14          | 2 | 0 | 0 | 0 |
| XLOC_015976   | 1 | 0 | 0 | 0 |
| XLOC_015981   | 2 | 0 | 0 | 0 |
| Lox           | 1 | 0 | 0 | 0 |
| Lipg          | 4 | 0 | 0 | 0 |
| XLOC_016075   | 1 | 0 | 0 | 0 |
| Slc14a2       | 1 | 0 | 0 | 0 |
| XLOC_016088   | 2 | 0 | 0 | 0 |
| XLOC_016096   | 1 | 0 | 0 | 0 |
| XLOC_015625   | 1 | 0 | 0 | 0 |
| XLOC_015631   | 2 | 0 | 0 | 0 |
| Rnf125        | 2 | 0 | 0 | 0 |
| XLOC_015662   | 1 | 0 | 0 | 0 |
| XLOC_015669   | 1 | 0 | 0 | 0 |
| Slc35a4       | 1 | 0 | 0 | 0 |
| XLOC_015799   | 2 | 0 | 0 | 0 |
| XLOC_015839   | 2 | 0 | 0 | 0 |
| XLOC_015863   | 1 | 0 | 0 | 0 |
| BC062254      | 1 | 0 | 0 | 0 |
| Dsc2          | 1 | 0 | 0 | 0 |
| Gm4013        | 1 | 0 | 0 | 0 |
| XLOC_016002   | 1 | 0 | 0 | 0 |
| 2310002L13Rik | 1 | 0 | 0 | 0 |
| Setbp1        | 3 | 0 | 0 | 0 |
| XLOC_015622   | 1 | 0 | 0 | 0 |
| XLOC_015624   | 1 | 0 | 0 | 0 |
| TRIF          | 1 | 0 | 0 | 0 |
| XLOC_015646   | 1 | 0 | 0 | 0 |
| XLOC_015739   | 1 | 0 | 0 | 0 |
| XLOC_015794   | 1 | 0 | 0 | 0 |
| 5330437I02Rik | 1 | 0 | 0 | 0 |
| XLOC_015893   | 1 | 0 | 0 | 0 |
| Mppe1         | 1 | 0 | 0 | 0 |
| Gm6225        | 1 | 0 | 0 | 0 |
| XLOC_015679   | 1 | 0 | 0 | 0 |
| XLOC_015724   | 1 | 0 | 0 | 0 |
| XLOC_015764   | 1 | 0 | 0 | 0 |
| Stard6        | 1 | 0 | 0 | 0 |

|               |   |   |   |   |
|---------------|---|---|---|---|
| Fbxo15        | 1 | 0 | 0 | 0 |
| XLOC_015940   | 1 | 0 | 0 | 0 |
| XLOC_015988   | 3 | 0 | 0 | 0 |
| Atp8b1        | 1 | 0 | 0 | 0 |
| Mc4r          | 1 | 0 | 0 | 0 |
| XLOC_016071   | 1 | 0 | 0 | 0 |
| Siglec15      | 1 | 0 | 0 | 0 |
| Mrpl21        | 2 | 0 | 0 | 0 |
| Cpt1a         | 5 | 0 | 0 | 0 |
| 1810055G02Rik | 2 | 0 | 0 | 0 |
| XLOC_016695   | 2 | 0 | 0 | 0 |
| Suv420h1      | 4 | 0 | 0 | 0 |
| Chka          | 5 | 0 | 0 | 0 |
| XLOC_016696   | 1 | 0 | 0 | 0 |
| Doc2g         | 6 | 0 | 0 | 0 |
| Cdk2ap2       | 2 | 0 | 0 | 0 |
| Pitpnm1       | 4 | 0 | 0 | 0 |
| Coro1b        | 5 | 0 | 0 | 0 |
| Ppp1ca        | 6 | 0 | 0 | 0 |
| Pold4         | 1 | 0 | 0 | 0 |
| XLOC_016711   | 3 | 0 | 0 | 0 |
| Pcx           | 2 | 0 | 0 | 0 |
| Spnb3         | 6 | 0 | 0 | 0 |
| Rbm4b         | 4 | 0 | 0 | 0 |
| Ccdc87        | 1 | 0 | 0 | 0 |
| Zdhhc24       | 3 | 0 | 0 | 0 |
| Mrpl11        | 3 | 0 | 0 | 0 |
| Slc29a2       | 1 | 0 | 0 | 0 |
| B3gnt1        | 2 | 0 | 0 | 0 |
| Cd248         | 1 | 0 | 0 | 0 |
| Gal3st3       | 2 | 0 | 0 | 0 |
| Eif1ad        | 1 | 0 | 0 | 0 |
| Bles03        | 1 | 0 | 0 | 0 |
| A1837181      | 1 | 0 | 0 | 0 |
| Fosl1         | 4 | 0 | 0 | 0 |
| Fibp          | 5 | 0 | 0 | 0 |
| Efemp2        | 4 | 0 | 0 | 0 |
| Cfl1          | 2 | 0 | 0 | 0 |
| Gm962         | 1 | 0 | 0 | 0 |
| XLOC_016735   | 1 | 0 | 0 | 0 |
| Rnaseh2c      | 4 | 0 | 0 | 0 |
| Rela          | 4 | 0 | 0 | 0 |
| Ltbp3         | 7 | 0 | 0 | 0 |
| Slc25a45      | 4 | 0 | 0 | 0 |
| Batf2         | 1 | 0 | 0 | 0 |
| Ehd1          | 1 | 0 | 0 | 0 |
| Cdc42bpg      | 7 | 0 | 0 | 0 |

|               |    |   |   |   |
|---------------|----|---|---|---|
| Men1          | 4  | 0 | 0 | 0 |
| Map4k2        | 2  | 0 | 0 | 0 |
| Sf1           | 4  | 0 | 0 | 0 |
| Pygm          | 4  | 0 | 0 | 0 |
| Rasgrp2       | 8  | 0 | 0 | 0 |
| Ppp1r14b      | 3  | 0 | 0 | 0 |
| Trpt1         | 5  | 0 | 0 | 0 |
| Rcor2         | 2  | 0 | 0 | 0 |
| Pla2g16       | 2  | 0 | 0 | 0 |
| XLOC_016767   | 5  | 0 | 0 | 0 |
| XLOC_016768   | 1  | 0 | 0 | 0 |
| Wdr74         | 3  | 0 | 0 | 0 |
| Stx5a         | 4  | 0 | 0 | 0 |
| Nxf1          | 6  | 0 | 0 | 0 |
| Zbtb3         | 3  | 0 | 0 | 0 |
| Hnrnpul2      | 3  | 0 | 0 | 0 |
| Ubxn1         | 2  | 0 | 0 | 0 |
| 1810009A15Rik | 3  | 0 | 0 | 0 |
| Eml3          | 4  | 0 | 0 | 0 |
| Eef1g         | 10 | 0 | 0 | 0 |
| Fth1          | 6  | 0 | 0 | 0 |
| Fads3         | 2  | 0 | 0 | 0 |
| Fads1         | 1  | 0 | 0 | 0 |
| 1810006K21Rik | 2  | 0 | 0 | 0 |
| Syt7          | 6  | 0 | 0 | 0 |
| Cpsf7         | 5  | 0 | 0 | 0 |
| Cybasc3       | 2  | 0 | 0 | 0 |
| Ddb1          | 2  | 0 | 0 | 0 |
| Vps37c        | 4  | 0 | 0 | 0 |
| Prpf19        | 5  | 0 | 0 | 0 |
| 4930526L06Rik | 1  | 0 | 0 | 0 |
| XLOC_016800   | 2  | 0 | 0 | 0 |
| Mrpl16        | 1  | 0 | 0 | 0 |
| Patl1         | 2  | 0 | 0 | 0 |
| Osbp          | 4  | 0 | 0 | 0 |
| Gm4952        | 1  | 0 | 0 | 0 |
| Glyat         | 3  | 0 | 0 | 0 |
| Lpxn          | 3  | 0 | 0 | 0 |
| Gnaq          | 6  | 0 | 0 | 0 |
| Rfk           | 3  | 0 | 0 | 0 |
| 2410127L17Rik | 4  | 0 | 0 | 0 |
| D030056L22Rik | 2  | 0 | 0 | 0 |
| Zfand5        | 7  | 0 | 0 | 0 |
| Fam108b       | 4  | 0 | 0 | 0 |
| Tmem2         | 3  | 0 | 0 | 0 |
| Trpm3         | 8  | 0 | 0 | 0 |
| Klf9          | 4  | 0 | 0 | 0 |



|               |       |   |   |   |   |
|---------------|-------|---|---|---|---|
| Gm9493        |       | 1 | 0 | 0 | 0 |
| Ptar1         |       | 4 | 0 | 0 | 0 |
| E030010A14Rik |       | 1 | 0 | 0 | 0 |
| Kank1         |       | 8 | 0 | 0 | 0 |
| Vldlr         |       | 7 | 0 | 0 | 0 |
| Slc1a1        |       | 3 | 0 | 0 | 0 |
| Cdc37l1       |       | 3 | 0 | 0 | 0 |
| Rcl1          |       | 4 | 0 | 0 | 0 |
| Jak2          |       | 3 | 0 | 0 | 0 |
| Cd274         |       | 4 | 0 | 0 | 0 |
| C030046E11Rik |       | 4 | 0 | 0 | 0 |
| Uhrf2         |       | 4 | 0 | 0 | 0 |
| Mbl2          |       | 1 | 0 | 0 | 0 |
| Cstf2t        |       | 1 | 0 | 0 | 0 |
| Minpp1        |       | 3 | 0 | 0 | 0 |
| Lipn          |       | 4 | 0 | 0 | 0 |
| Stambpl1      |       | 7 | 0 | 0 | 0 |
| Ifit2         |       | 6 | 0 | 0 | 0 |
| Ifit3         |       | 3 | 0 | 0 | 0 |
| I830012O16Rik |       | 2 | 0 | 0 | 0 |
| Ifit1         |       | 2 | 0 | 0 | 0 |
| Kif20b        |       | 7 | 0 | 0 | 0 |
| Rpp30         |       | 4 | 0 | 0 | 0 |
| Pcgf5         |       | 5 | 0 | 0 | 0 |
| Hectd2        |       | 7 | 0 | 0 | 0 |
| Tnks2         |       | 4 | 0 | 0 | 0 |
| Btaf1         |       | 6 | 0 | 0 | 0 |
|               | 41703 | 2 | 0 | 0 | 0 |
| Hhex          |       | 2 | 0 | 0 | 0 |
| Exoc6         |       | 4 | 0 | 0 | 0 |
| Cyp26c1       |       | 1 | 0 | 0 | 0 |
| XLOC_016887   |       | 2 | 0 | 0 | 0 |
| Tmem20        |       | 1 | 0 | 0 | 0 |
| Pfce1         |       | 6 | 0 | 0 | 0 |
| Tbc1d12       |       | 3 | 0 | 0 | 0 |
| XLOC_016897   |       | 1 | 0 | 0 | 0 |
| Entpd1        |       | 3 | 0 | 0 | 0 |
| Zfp518a       |       | 7 | 0 | 0 | 0 |
| Gm9788        |       | 1 | 0 | 0 | 0 |
| Lcor          |       | 5 | 0 | 0 | 0 |
| Frat1         |       | 1 | 0 | 0 | 0 |
| Zdhhc16       |       | 5 | 0 | 0 | 0 |
| Ubtd1         |       | 7 | 0 | 0 | 0 |
| Pi4k2a        |       | 1 | 0 | 0 | 0 |
| Marveld1      |       | 1 | 0 | 0 | 0 |
| Zfyve27       |       | 3 | 0 | 0 | 0 |
| Golga7b       |       | 2 | 0 | 0 | 0 |

|               |   |   |   |   |
|---------------|---|---|---|---|
| D19Ert386e    | 3 | 0 | 0 | 0 |
| Gm6776        | 1 | 0 | 0 | 0 |
| Cnm1          | 2 | 0 | 0 | 0 |
| AK076978      | 1 | 0 | 0 | 0 |
| Entpd7        | 1 | 0 | 0 | 0 |
| Scd2          | 7 | 0 | 0 | 0 |
| Hif1an        | 1 | 0 | 0 | 0 |
| Pax2          | 2 | 0 | 0 | 0 |
| Fam178a       | 5 | 0 | 0 | 0 |
| Lzts2         | 3 | 0 | 0 | 0 |
| Sfxn3         | 3 | 0 | 0 | 0 |
| Kazald1       | 6 | 0 | 0 | 0 |
| XLOC_016935   | 6 | 0 | 0 | 0 |
| Btrc          | 5 | 0 | 0 | 0 |
| Dpcd          | 1 | 0 | 0 | 0 |
| Pprc1         | 9 | 0 | 0 | 0 |
| Nolc1         | 3 | 0 | 0 | 0 |
| Nfkb2         | 2 | 0 | 0 | 0 |
| Sufu          | 3 | 0 | 0 | 0 |
| Trim8         | 4 | 0 | 0 | 0 |
| Sfxn2         | 7 | 0 | 0 | 0 |
| D19Wsu162e    | 4 | 0 | 0 | 0 |
| 2010012005Rik | 2 | 0 | 0 | 0 |
| XLOC_016954   | 2 | 0 | 0 | 0 |
| Ina           | 1 | 0 | 0 | 0 |
| Taf5          | 1 | 0 | 0 | 0 |
| Pdcd11        | 4 | 0 | 0 | 0 |
| Neur1a        | 4 | 0 | 0 | 0 |
| Slk           | 8 | 0 | 0 | 0 |
| 6330577E15Rik | 3 | 0 | 0 | 0 |
| Gsto1         | 2 | 0 | 0 | 0 |
| Ccdc147       | 5 | 0 | 0 | 0 |
| Sorcs3        | 1 | 0 | 0 | 0 |
| Mxi1          | 6 | 0 | 0 | 0 |
| Dusp5         | 4 | 0 | 0 | 0 |
| XLOC_016971   | 5 | 0 | 0 | 0 |
| Smc3          | 1 | 0 | 0 | 0 |
| Pdcd4         | 2 | 0 | 0 | 0 |
| Shoc2         | 3 | 0 | 0 | 0 |
| XLOC_016974   | 2 | 0 | 0 | 0 |
| Acsl5         | 2 | 0 | 0 | 0 |
| Vti1a         | 3 | 0 | 0 | 0 |
| Casp7         | 1 | 0 | 0 | 0 |
| Fam160b1      | 1 | 0 | 0 | 0 |
| Trub1         | 1 | 0 | 0 | 0 |
| Atrnl1        | 7 | 0 | 0 | 0 |
| Eno4          | 3 | 0 | 0 | 0 |

|               |    |   |   |   |
|---------------|----|---|---|---|
| XLOC_016995   | 4  | 0 | 0 | 0 |
| Nanos1        | 1  | 0 | 0 | 0 |
| Fam45a        | 3  | 0 | 0 | 0 |
| Grk5          | 1  | 0 | 0 | 0 |
| Ighmbp2       | 4  | 0 | 0 | 0 |
| Ppp6r3        | 9  | 0 | 0 | 0 |
| Lrp5          | 4  | 0 | 0 | 0 |
| AK144662      | 1  | 0 | 0 | 0 |
| XLOC_017008   | 1  | 0 | 0 | 0 |
| Tcirg1        | 7  | 0 | 0 | 0 |
| Ndufs8        | 4  | 0 | 0 | 0 |
| Aip           | 2  | 0 | 0 | 0 |
| Rps6kb2       | 4  | 0 | 0 | 0 |
| Tbc1d10c      | 6  | 0 | 0 | 0 |
| Ankrd13d      | 10 | 0 | 0 | 0 |
| Adrbk1        | 5  | 0 | 0 | 0 |
| Kdm2a         | 5  | 0 | 0 | 0 |
| Rhod          | 2  | 0 | 0 | 0 |
| Syt12         | 2  | 0 | 0 | 0 |
| 2010003K11Rik | 1  | 0 | 0 | 0 |
| Lrfn4         | 3  | 0 | 0 | 0 |
| Rbm4          | 3  | 0 | 0 | 0 |
| Rbm14         | 1  | 0 | 0 | 0 |
| Ccs           | 1  | 0 | 0 | 0 |
| Bbs1          | 5  | 0 | 0 | 0 |
| Dpp3          | 5  | 0 | 0 | 0 |
| Peli3         | 3  | 0 | 0 | 0 |
| Klc2          | 5  | 0 | 0 | 0 |
| Sf3b2         | 7  | 0 | 0 | 0 |
| Cst6          | 1  | 0 | 0 | 0 |
| Banf1         | 4  | 0 | 0 | 0 |
| Sart1         | 4  | 0 | 0 | 0 |
| Drap1         | 6  | 0 | 0 | 0 |
| Ccdc85b       | 1  | 0 | 0 | 0 |
| Snx32         | 4  | 0 | 0 | 0 |
| Kat5          | 6  | 0 | 0 | 0 |
| Pcnx13        | 8  | 0 | 0 | 0 |
| Ehbp111       | 6  | 0 | 0 | 0 |
| Sssca1        | 3  | 0 | 0 | 0 |
| Scyl1         | 7  | 0 | 0 | 0 |
| AK197973      | 3  | 0 | 0 | 0 |
| Tigd3         | 2  | 0 | 0 | 0 |
| Cdc42ep2      | 1  | 0 | 0 | 0 |
| Pola2         | 7  | 0 | 0 | 0 |
| Capn1         | 4  | 0 | 0 | 0 |
| Mrpl49        | 2  | 0 | 0 | 0 |
| 1110014N23Rik | 5  | 0 | 0 | 0 |

|               |    |   |   |   |
|---------------|----|---|---|---|
| Zfp1          | 2  | 0 | 0 | 0 |
| Sac3d1        | 2  | 0 | 0 | 0 |
| Snx15         | 3  | 0 | 0 | 0 |
| Arl2          | 4  | 0 | 0 | 0 |
| Ppp2r5b       | 7  | 0 | 0 | 0 |
| Gm14966       | 1  | 0 | 0 | 0 |
| Rps6ka4       | 2  | 0 | 0 | 0 |
| Esrra         | 3  | 0 | 0 | 0 |
| Kcnk4         | 6  | 0 | 0 | 0 |
| Fkbp2         | 4  | 0 | 0 | 0 |
| Vegfb         | 12 | 0 | 0 | 0 |
| Stip1         | 1  | 0 | 0 | 0 |
| Otub1         | 4  | 0 | 0 | 0 |
| Mark2         | 8  | 0 | 0 | 0 |
| A1846148      | 2  | 0 | 0 | 0 |
| Rtn3          | 4  | 0 | 0 | 0 |
| Slc3a2        | 4  | 0 | 0 | 0 |
| Taf6l         | 1  | 0 | 0 | 0 |
| Polr2g        | 4  | 0 | 0 | 0 |
| Ttc9c         | 2  | 0 | 0 | 0 |
| Gng3          | 6  | 0 | 0 | 0 |
| A1462493      | 1  | 0 | 0 | 0 |
| Scgb1a1       | 1  | 0 | 0 | 0 |
| Asrgl1        | 1  | 0 | 0 | 0 |
| Stxbp3b       | 1  | 0 | 0 | 0 |
| Incenp        | 5  | 0 | 0 | 0 |
| Best1         | 5  | 0 | 0 | 0 |
| Fads2         | 2  | 0 | 0 | 0 |
| Fen1          | 2  | 0 | 0 | 0 |
| Gm98          | 5  | 0 | 0 | 0 |
| Dagla         | 3  | 0 | 0 | 0 |
| Sdhaf2        | 4  | 0 | 0 | 0 |
| Dak           | 4  | 0 | 0 | 0 |
| Tmem132a      | 4  | 0 | 0 | 0 |
| Tmem109       | 1  | 0 | 0 | 0 |
| Ccdc86        | 1  | 0 | 0 | 0 |
| AW112010      | 1  | 0 | 0 | 0 |
| Ms4a3         | 2  | 0 | 0 | 0 |
| Stx3          | 4  | 0 | 0 | 0 |
| Dtx4          | 4  | 0 | 0 | 0 |
| A330040F15Rik | 4  | 0 | 0 | 0 |
| Zfp91         | 3  | 0 | 0 | 0 |
| Tle4          | 6  | 0 | 0 | 0 |
| Psat1         | 2  | 0 | 0 | 0 |
| Cep78         | 3  | 0 | 0 | 0 |
| Vps13a        | 6  | 0 | 0 | 0 |
| XLOC_017144   | 5  | 0 | 0 | 0 |

|               |    |   |   |   |
|---------------|----|---|---|---|
| Pcsk5         | 3  | 0 | 0 | 0 |
| Ostf1         | 9  | 0 | 0 | 0 |
| Anxa1         | 3  | 0 | 0 | 0 |
| Aldh1a7       | 1  | 0 | 0 | 0 |
| Tmc1          | 1  | 0 | 0 | 0 |
| Gda           | 2  | 0 | 0 | 0 |
| 1110059E24Rik | 3  | 0 | 0 | 0 |
| Smc5          | 6  | 0 | 0 | 0 |
| Fam189a2      | 4  | 0 | 0 | 0 |
| Fxn           | 3  | 0 | 0 | 0 |
| Pip5k1b       | 4  | 0 | 0 | 0 |
| Cbwd1         | 2  | 0 | 0 | 0 |
| D19Bwg1357e   | 2  | 0 | 0 | 0 |
| Gm6788        | 1  | 0 | 0 | 0 |
| 4430402I18Rik | 3  | 0 | 0 | 0 |
| Ak3           | 1  | 0 | 0 | 0 |
| Insl6         | 1  | 0 | 0 | 0 |
| 5033414D02Rik | 5  | 0 | 0 | 0 |
| A930007I19Rik | 1  | 0 | 0 | 0 |
| 9930021J03Rik | 9  | 0 | 0 | 0 |
| Ranbp6        | 1  | 0 | 0 | 0 |
| Gldc          | 3  | 0 | 0 | 0 |
| Sgms1         | 6  | 0 | 0 | 0 |
| Atad1         | 2  | 0 | 0 | 0 |
| Rnl3          | 2  | 0 | 0 | 0 |
| Lipo2         | 3  | 0 | 0 | 0 |
| Acta2         | 1  | 0 | 0 | 0 |
| Lipa          | 3  | 0 | 0 | 0 |
| Pank1         | 3  | 0 | 0 | 0 |
| Htr7          | 7  | 0 | 0 | 0 |
| Cpeb3         | 7  | 0 | 0 | 0 |
| Ide           | 6  | 0 | 0 | 0 |
| Myof          | 4  | 0 | 0 | 0 |
| 5730455O13Rik | 6  | 0 | 0 | 0 |
| Noc3l         | 3  | 0 | 0 | 0 |
| Pdlim1        | 4  | 0 | 0 | 0 |
| Sorbs1        | 16 | 0 | 0 | 0 |
| Aldh18a1      | 6  | 0 | 0 | 0 |
| Tctn3         | 4  | 0 | 0 | 0 |
| Tm9sf3        | 2  | 0 | 0 | 0 |
| Slit1         | 7  | 0 | 0 | 0 |
| Arhgap19      | 5  | 0 | 0 | 0 |
| Frat2         | 1  | 0 | 0 | 0 |
| Rrp12         | 2  | 0 | 0 | 0 |
| Exosc1        | 1  | 0 | 0 | 0 |
| Mms19         | 5  | 0 | 0 | 0 |
| Morn4         | 1  | 0 | 0 | 0 |

|               |   |   |   |   |
|---------------|---|---|---|---|
| Avpi1         | 3 | 0 | 0 | 0 |
| Sfrp5         | 3 | 0 | 0 | 0 |
| Crtac1        | 2 | 0 | 0 | 0 |
| Loxl4         | 4 | 0 | 0 | 0 |
| Got1          | 1 | 0 | 0 | 0 |
| Slc25a28      | 3 | 0 | 0 | 0 |
| Cox15         | 2 | 0 | 0 | 0 |
| Cpn1          | 2 | 0 | 0 | 0 |
| Erlin1        | 4 | 0 | 0 | 0 |
| Chuk          | 5 | 0 | 0 | 0 |
| Cwf19l1       | 5 | 0 | 0 | 0 |
| Bloc1s2       | 6 | 0 | 0 | 0 |
| XLOC_017240   | 2 | 0 | 0 | 0 |
| Scd1          | 5 | 0 | 0 | 0 |
| Ndufb8        | 6 | 0 | 0 | 0 |
| Mrpl43        | 1 | 0 | 0 | 0 |
| Pdzd7         | 4 | 0 | 0 | 0 |
| Poll          | 2 | 0 | 0 | 0 |
| Fbxw4         | 5 | 0 | 0 | 0 |
| Npm3          | 3 | 0 | 0 | 0 |
| Mgea5         | 6 | 0 | 0 | 0 |
| Kcnip2        | 2 | 0 | 0 | 0 |
| 9130011E15Rik | 4 | 0 | 0 | 0 |
| Ldb1          | 7 | 0 | 0 | 0 |
| Psd           | 8 | 0 | 0 | 0 |
| Cuedc2        | 3 | 0 | 0 | 0 |
| Actr1a        | 4 | 0 | 0 | 0 |
| Nt5c2         | 3 | 0 | 0 | 0 |
| Usmg5         | 2 | 0 | 0 | 0 |
| Calhm2        | 1 | 0 | 0 | 0 |
| Sh3pxd2a      | 4 | 0 | 0 | 0 |
| Obfc1         | 3 | 0 | 0 | 0 |
| Itrip         | 2 | 0 | 0 | 0 |
| Rpl13a-ps1    | 1 | 0 | 0 | 0 |
| Sorcs1        | 5 | 0 | 0 | 0 |
| Xpnpep1       | 4 | 0 | 0 | 0 |
| Smndc1        | 4 | 0 | 0 | 0 |
| 5830416P10Rik | 4 | 0 | 0 | 0 |
| XLOC_017276   | 1 | 0 | 0 | 0 |
| Gpam          | 7 | 0 | 0 | 0 |
| Nrap          | 1 | 0 | 0 | 0 |
| Dclre1a       | 4 | 0 | 0 | 0 |
| A630007B06Rik | 4 | 0 | 0 | 0 |
| Afap1l2       | 6 | 0 | 0 | 0 |
| XLOC_017287   | 1 | 0 | 0 | 0 |
| Ablim1        | 7 | 0 | 0 | 0 |
| AK045643      | 6 | 0 | 0 | 0 |

|               |    |   |   |   |
|---------------|----|---|---|---|
| GDNFR-alpha   | 6  | 0 | 0 | 0 |
| Hspa12a       | 4  | 0 | 0 | 0 |
| 4930506M07Rik | 6  | 0 | 0 | 0 |
| Pdzd8         | 3  | 0 | 0 | 0 |
| Rab11fip2     | 6  | 0 | 0 | 0 |
| D19Ert737e    | 3  | 0 | 0 | 0 |
| 2700078E11Rik | 4  | 0 | 0 | 0 |
| Eif3a         | 5  | 0 | 0 | 0 |
| Sfxn4         | 2  | 0 | 0 | 0 |
| Prdx3         | 1  | 0 | 0 | 0 |
| AK039536      | 4  | 0 | 0 | 0 |
| Aldh3b2       | 1  | 0 | 0 | 0 |
| Ptprcap       | 1  | 0 | 0 | 0 |
| Yif1a         | 2  | 0 | 0 | 0 |
| Syvn1         | 5  | 0 | 0 | 0 |
| MacroD1       | 1  | 0 | 0 | 0 |
| At13          | 3  | 0 | 0 | 0 |
| XLOC_016766   | 1  | 0 | 0 | 0 |
| Chrm1         | 2  | 0 | 0 | 0 |
| Bscl2         | 2  | 0 | 0 | 0 |
| Lrrn4cl       | 2  | 0 | 0 | 0 |
| XLOC_016777   | 1  | 0 | 0 | 0 |
| Ganab         | 10 | 0 | 0 | 0 |
| B3gat3        | 3  | 0 | 0 | 0 |
| Slc15a3       | 4  | 0 | 0 | 0 |
| XLOC_016816   | 1  | 0 | 0 | 0 |
| XLOC_016820   | 2  | 0 | 0 | 0 |
| BC016495      | 2  | 0 | 0 | 0 |
| Trpm6         | 4  | 0 | 0 | 0 |
| XLOC_016834   | 1  | 0 | 0 | 0 |
| Apba1         | 4  | 0 | 0 | 0 |
| Dock8         | 6  | 0 | 0 | 0 |
| Ppapdc2       | 1  | 0 | 0 | 0 |
| Kif11         | 8  | 0 | 0 | 0 |
| XLOC_016900   | 4  | 0 | 0 | 0 |
| XLOC_016934   | 1  | 0 | 0 | 0 |
| XLOC_016936   | 2  | 0 | 0 | 0 |
| Fbxl15        | 1  | 0 | 0 | 0 |
| Cnnm2         | 2  | 0 | 0 | 0 |
| Gsto2         | 5  | 0 | 0 | 0 |
| Rbm20         | 2  | 0 | 0 | 0 |
| XLOC_016979   | 1  | 0 | 0 | 0 |
| mKIAA1600     | 1  | 0 | 0 | 0 |
| Pnlip         | 1  | 0 | 0 | 0 |
| XLOC_017002   | 1  | 0 | 0 | 0 |
| Gstp1         | 1  | 0 | 0 | 0 |
| Rce1          | 4  | 0 | 0 | 0 |

|               |   |   |   |   |
|---------------|---|---|---|---|
| Cnih2         | 2 | 0 | 0 | 0 |
| Rab1b         | 1 | 0 | 0 | 0 |
| Mus81         | 3 | 0 | 0 | 0 |
| Malat1        | 1 | 0 | 0 | 0 |
| Tmem138       | 2 | 0 | 0 | 0 |
| Cd6           | 2 | 0 | 0 | 0 |
| Rfx3          | 2 | 0 | 0 | 0 |
| 4430402I18Rik | 3 | 0 | 0 | 0 |
| Ermp1         | 4 | 0 | 0 | 0 |
| Gm14446       | 3 | 0 | 0 | 0 |
| Rbp4          | 1 | 0 | 0 | 0 |
| Blnk          | 2 | 0 | 0 | 0 |
| XLOC_017274   | 3 | 0 | 0 | 0 |
| Bbip1         | 1 | 0 | 0 | 0 |
| Gucy2g        | 3 | 0 | 0 | 0 |
| Zdhhc6        | 1 | 0 | 0 | 0 |
| Gfra1         | 1 | 0 | 0 | 0 |
| Nudt8         | 2 | 0 | 0 | 0 |
| XLOC_016733   | 2 | 0 | 0 | 0 |
| Kcnk7         | 2 | 0 | 0 | 0 |
| AK009639      | 1 | 0 | 0 | 0 |
| Naaladl1      | 2 | 0 | 0 | 0 |
| Snhg1         | 1 | 0 | 0 | 0 |
| XLOC_016781   | 1 | 0 | 0 | 0 |
| XLOC_016818   | 3 | 0 | 0 | 0 |
| XLOC_016860   | 1 | 0 | 0 | 0 |
| AK142879      | 2 | 0 | 0 | 0 |
| XLOC_016892   | 1 | 0 | 0 | 0 |
| AK167556      | 2 | 0 | 0 | 0 |
| Ankrd2        | 1 | 0 | 0 | 0 |
| XLOC_016915   | 2 | 0 | 0 | 0 |
| Peo1          | 2 | 0 | 0 | 0 |
| Tm7sf2        | 1 | 0 | 0 | 0 |
| Prdx5         | 1 | 0 | 0 | 0 |
| Rom1          | 1 | 0 | 0 | 0 |
| XLOC_017138   | 3 | 0 | 0 | 0 |
| Pgm5          | 1 | 0 | 0 | 0 |
| Lipo1         | 4 | 0 | 0 | 0 |
| AK168860      | 1 | 0 | 0 | 0 |
| Tll2          | 1 | 0 | 0 | 0 |
| Pkd2l1        | 3 | 0 | 0 | 0 |
| XLOC_017247   | 2 | 0 | 0 | 0 |
| 2310034G01Rik | 1 | 0 | 0 | 0 |
| XLOC_016731   | 1 | 0 | 0 | 0 |
| XLOC_016750   | 1 | 0 | 0 | 0 |
| AK044380      | 1 | 0 | 0 | 0 |
| XLOC_016817   | 1 | 0 | 0 | 0 |



|               |    |   |   |   |
|---------------|----|---|---|---|
| XLOC_016821   | 1  | 0 | 0 | 0 |
| XLOC_016824   | 1  | 0 | 0 | 0 |
| XLOC_016894   | 2  | 0 | 0 | 0 |
| XLOC_016896   | 1  | 0 | 0 | 0 |
| XLOC_016913   | 1  | 0 | 0 | 0 |
| Cutc          | 2  | 0 | 0 | 0 |
| XLOC_016941   | 1  | 0 | 0 | 0 |
| XLOC_017001   | 3  | 0 | 0 | 0 |
| Rad9          | 2  | 0 | 0 | 0 |
| Actn3         | 1  | 0 | 0 | 0 |
| Ctsw          | 2  | 0 | 0 | 0 |
| Gpr137        | 2  | 0 | 0 | 0 |
| AK089615      | 2  | 0 | 0 | 0 |
| XLOC_017291   | 1  | 0 | 0 | 0 |
| 1700019N19Rik | 1  | 0 | 0 | 0 |
| AK028012      | 2  | 0 | 0 | 0 |
| 2700046G09Rik | 1  | 0 | 0 | 0 |
| XLOC_016866   | 1  | 0 | 0 | 0 |
| XLOC_016879   | 1  | 0 | 0 | 0 |
| Lgi1          | 2  | 0 | 0 | 0 |
| AA387883      | 1  | 0 | 0 | 0 |
| Gm16277       | 1  | 0 | 0 | 0 |
| XLOC_016991   | 2  | 0 | 0 | 0 |
| XLOC_017026   | 1  | 0 | 0 | 0 |
| AK134945      | 2  | 0 | 0 | 0 |
| Ms4a14        | 2  | 0 | 0 | 0 |
| Mtl5          | 1  | 0 | 0 | 0 |
| XLOC_016710   | 1  | 0 | 0 | 0 |
| Cdca5         | 1  | 0 | 0 | 0 |
| Ms4a4b        | 1  | 0 | 0 | 0 |
| XLOC_016813   | 1  | 0 | 0 | 0 |
| XLOC_016839   | 1  | 0 | 0 | 0 |
| Sema4g        | 4  | 0 | 0 | 0 |
| XLOC_016966   | 1  | 0 | 0 | 0 |
| XLOC_017036   | 1  | 0 | 0 | 0 |
| XLOC_017139   | 1  | 0 | 0 | 0 |
| XLOC_017248   | 1  | 0 | 0 | 0 |
| XLOC_017270   | 1  | 0 | 0 | 0 |
| XLOC_017290   | 1  | 0 | 0 | 0 |
| Fam171a1      | 5  | 0 | 0 | 0 |
| Nmt2          | 4  | 0 | 0 | 0 |
| Dclre1c       | 3  | 0 | 0 | 0 |
| Cdnf          | 4  | 0 | 0 | 0 |
| Fam107b       | 4  | 0 | 0 | 0 |
| Frmd4a        | 11 | 0 | 0 | 0 |
| Phyh          | 1  | 0 | 0 | 0 |
| Upf2          | 4  | 0 | 0 | 0 |

|               |    |   |   |   |
|---------------|----|---|---|---|
| Usp6nl        | 7  | 0 | 0 | 0 |
| Sfmbt2        | 2  | 0 | 0 | 0 |
| Prkcq         | 4  | 0 | 0 | 0 |
| Ankrd16       | 8  | 0 | 0 | 0 |
| Pter          | 2  | 0 | 0 | 0 |
| Stam          | 4  | 0 | 0 | 0 |
| Cacnb2        | 4  | 0 | 0 | 0 |
| Arl5b         | 3  | 0 | 0 | 0 |
| Gm13368       | 1  | 0 | 0 | 0 |
| Plxdc2        | 3  | 0 | 0 | 0 |
| Commd3        | 2  | 0 | 0 | 0 |
| Bmi1          | 4  | 0 | 0 | 0 |
| BC061194      | 8  | 0 | 0 | 0 |
| AK076779      | 9  | 0 | 0 | 0 |
| Msrb2         | 5  | 0 | 0 | 0 |
| Etl4          | 14 | 0 | 0 | 0 |
| Gm13375       | 3  | 0 | 0 | 0 |
| Gpr158        | 1  | 0 | 0 | 0 |
| Apbb1ip       | 3  | 0 | 0 | 0 |
| Acbd5         | 3  | 0 | 0 | 0 |
| Yme1l1        | 6  | 0 | 0 | 0 |
| Zmynd19       | 2  | 0 | 0 | 0 |
| Pnpla7        | 9  | 0 | 0 | 0 |
| Nelf          | 9  | 0 | 0 | 0 |
| Nrarp         | 1  | 0 | 0 | 0 |
| Tprn          | 1  | 0 | 0 | 0 |
| Anapc2        | 1  | 0 | 0 | 0 |
| Man1b1        | 1  | 0 | 0 | 0 |
| Npdc1         | 3  | 0 | 0 | 0 |
| Fut7          | 4  | 0 | 0 | 0 |
| Clic3         | 1  | 0 | 0 | 0 |
| Edf1          | 5  | 0 | 0 | 0 |
| Kcnt1         | 8  | 0 | 0 | 0 |
| Gpsm1         | 5  | 0 | 0 | 0 |
| Pmpca         | 6  | 0 | 0 | 0 |
| Egfl7         | 4  | 0 | 0 | 0 |
| Fam69b        | 1  | 0 | 0 | 0 |
| 5930434B04Rik | 4  | 0 | 0 | 0 |
| Adamtsl2      | 8  | 0 | 0 | 0 |
| BC094334      | 1  | 0 | 0 | 0 |
| Wdr5          | 1  | 0 | 0 | 0 |
| BC050122      | 3  | 0 | 0 | 0 |
| Rxra          | 5  | 0 | 0 | 0 |
| Col5a1        | 4  | 0 | 0 | 0 |
| F730016J06Rik | 3  | 0 | 0 | 0 |
| Olfm1         | 4  | 0 | 0 | 0 |
| XLOC_017966   | 2  | 0 | 0 | 0 |

|             |    |   |   |   |
|-------------|----|---|---|---|
| Mrps2       | 1  | 0 | 0 | 0 |
| Gbgt1       | 3  | 0 | 0 | 0 |
| Ralgds      | 6  | 0 | 0 | 0 |
| Tsc1        | 8  | 0 | 0 | 0 |
| Ak8         | 3  | 0 | 0 | 0 |
| Ttf1        | 8  | 0 | 0 | 0 |
| Setx        | 4  | 0 | 0 | 0 |
| Med27       | 4  | 0 | 0 | 0 |
| Rapgef1     | 12 | 0 | 0 | 0 |
| Coq4        | 1  | 0 | 0 | 0 |
| Slc27a4     | 5  | 0 | 0 | 0 |
| Urm1        | 4  | 0 | 0 | 0 |
| Odf2        | 13 | 0 | 0 | 0 |
| Gle1        | 2  | 0 | 0 | 0 |
| Spna2       | 11 | 0 | 0 | 0 |
| Tbc1d13     | 3  | 0 | 0 | 0 |
| Slc39a1-ps  | 1  | 0 | 0 | 0 |
| Endog       | 2  | 0 | 0 | 0 |
| Lrrc8a      | 4  | 0 | 0 | 0 |
| Fam73b      | 1  | 0 | 0 | 0 |
| Ppp2r4      | 9  | 0 | 0 | 0 |
| Cstad       | 1  | 0 | 0 | 0 |
| Mettl11a    | 2  | 0 | 0 | 0 |
| Usp20       | 6  | 0 | 0 | 0 |
| Gpr107      | 3  | 0 | 0 | 0 |
| Ncs1        | 3  | 0 | 0 | 0 |
| Fubp3       | 8  | 0 | 0 | 0 |
| Prdm12      | 5  | 0 | 0 | 0 |
| Exosc2      | 2  | 0 | 0 | 0 |
| Abl1        | 3  | 0 | 0 | 0 |
| Aif1l       | 1  | 0 | 0 | 0 |
| Nup214      | 4  | 0 | 0 | 0 |
| Ppapdc3     | 1  | 0 | 0 | 0 |
| Prrc2b      | 2  | 0 | 0 | 0 |
| Pomt1       | 1  | 0 | 0 | 0 |
| Gm13611     | 1  | 0 | 0 | 0 |
| Ciz1        | 7  | 0 | 0 | 0 |
| Ptges2      | 7  | 0 | 0 | 0 |
| Naif1       | 2  | 0 | 0 | 0 |
| Fam102a     | 3  | 0 | 0 | 0 |
| St6galnac4  | 3  | 0 | 0 | 0 |
| Ak1         | 3  | 0 | 0 | 0 |
| Eng         | 2  | 0 | 0 | 0 |
| XLOC_018024 | 2  | 0 | 0 | 0 |
| Tor2a       | 1  | 0 | 0 | 0 |
| XLOC_018026 | 2  | 0 | 0 | 0 |
| Angptl2     | 3  | 0 | 0 | 0 |

|             |       |    |   |   |   |
|-------------|-------|----|---|---|---|
| Gm13530     |       | 1  | 0 | 0 | 0 |
| Mapkap1     |       | 6  | 0 | 0 | 0 |
| Hspa5       |       | 3  | 0 | 0 | 0 |
| Gsn         |       | 6  | 0 | 0 | 0 |
| Dab2ip      |       | 5  | 0 | 0 | 0 |
| Mrrf        |       | 3  | 0 | 0 | 0 |
| XLOC_018042 |       | 2  | 0 | 0 | 0 |
| Rabgap1     |       | 6  | 0 | 0 | 0 |
| XLOC_018045 |       | 3  | 0 | 0 | 0 |
| Olfml2a     |       | 1  | 0 | 0 | 0 |
| Arpc5l      |       | 1  | 0 | 0 | 0 |
| Acvr2a      |       | 1  | 0 | 0 | 0 |
| Mbd5        |       | 3  | 0 | 0 | 0 |
| Epc2        |       | 3  | 0 | 0 | 0 |
| Kif5c       |       | 8  | 0 | 0 | 0 |
| Lypd6       |       | 4  | 0 | 0 | 0 |
| AK045825    |       | 2  | 0 | 0 | 0 |
| XLOC_018066 |       | 2  | 0 | 0 | 0 |
| Tnfaip6     |       | 1  | 0 | 0 | 0 |
| Gm13540     |       | 1  | 0 | 0 | 0 |
| XLOC_018073 |       | 5  | 0 | 0 | 0 |
| Arl6ip6     |       | 3  | 0 | 0 | 0 |
| Gm13503     |       | 1  | 0 | 0 | 0 |
| XLOC_018077 |       | 2  | 0 | 0 | 0 |
| Galnt13     |       | 7  | 0 | 0 | 0 |
| AK036371    |       | 2  | 0 | 0 | 0 |
| XLOC_018081 |       | 1  | 0 | 0 | 0 |
| Kcnj3       |       | 7  | 0 | 0 | 0 |
| Gpd2        |       | 3  | 0 | 0 | 0 |
| Galnt5      |       | 3  | 0 | 0 | 0 |
| Pkp4        |       | 4  | 0 | 0 | 0 |
| Dapl1       |       | 1  | 0 | 0 | 0 |
| Tanc1       |       | 6  | 0 | 0 | 0 |
|             | 41705 | 2  | 0 | 0 | 0 |
| Tank        |       | 6  | 0 | 0 | 0 |
| Psm14       |       | 3  | 0 | 0 | 0 |
| Slc4a10     |       | 5  | 0 | 0 | 0 |
| Gca         |       | 4  | 0 | 0 | 0 |
| XLOC_018100 |       | 3  | 0 | 0 | 0 |
| AK007819    |       | 1  | 0 | 0 | 0 |
| Scn2a1      |       | 11 | 0 | 0 | 0 |
| Csrnp3      |       | 7  | 0 | 0 | 0 |
| Gm13630     |       | 5  | 0 | 0 | 0 |
| Gm13602     |       | 1  | 0 | 0 | 0 |
| Gm13597     |       | 1  | 0 | 0 | 0 |
| Lass6       |       | 2  | 0 | 0 | 0 |
| Nostrin     |       | 2  | 0 | 0 | 0 |

|               |   |   |   |   |
|---------------|---|---|---|---|
| Bbs5          | 2 | 0 | 0 | 0 |
| Ppig          | 5 | 0 | 0 | 0 |
| Ssb           | 5 | 0 | 0 | 0 |
| Ubr3          | 5 | 0 | 0 | 0 |
| Rpl9-ps7      | 1 | 0 | 0 | 0 |
| Gorasp2       | 2 | 0 | 0 | 0 |
| Cybrd1        | 1 | 0 | 0 | 0 |
| Dync1i2       | 9 | 0 | 0 | 0 |
| Hat1          | 2 | 0 | 0 | 0 |
| Metap1d       | 8 | 0 | 0 | 0 |
| AK144798      | 1 | 0 | 0 | 0 |
| Pdk1          | 5 | 0 | 0 | 0 |
| Rapgef4       | 5 | 0 | 0 | 0 |
| B230120H23Rik | 3 | 0 | 0 | 0 |
| Cdca7         | 4 | 0 | 0 | 0 |
| Scrn3         | 3 | 0 | 0 | 0 |
| AK029663      | 2 | 0 | 0 | 0 |
| Gm13705       | 3 | 0 | 0 | 0 |
| XLOC_018147   | 1 | 0 | 0 | 0 |
| Mtx2          | 4 | 0 | 0 | 0 |
| XLOC_018152   | 8 | 0 | 0 | 0 |
| Hnrnpa3       | 1 | 0 | 0 | 0 |
| Agps          | 3 | 0 | 0 | 0 |
| Rbm45         | 1 | 0 | 0 | 0 |
| Osbpl6        | 5 | 0 | 0 | 0 |
| Ube2e3        | 8 | 0 | 0 | 0 |
| Itga4         | 4 | 0 | 0 | 0 |
| XLOC_018167   | 1 | 0 | 0 | 0 |
| Ssfa2         | 7 | 0 | 0 | 0 |
| Ppp1r1c       | 5 | 0 | 0 | 0 |
| Dnajc10       | 1 | 0 | 0 | 0 |
| Nup35         | 5 | 0 | 0 | 0 |
| Zfp804a       | 4 | 0 | 0 | 0 |
| Gm13675       | 1 | 0 | 0 | 0 |
| Zc3h15        | 2 | 0 | 0 | 0 |
| Itgav         | 6 | 0 | 0 | 0 |
| Fam171b       | 5 | 0 | 0 | 0 |
| Med19         | 2 | 0 | 0 | 0 |
| Ube2l6        | 1 | 0 | 0 | 0 |
| Timm10        | 1 | 0 | 0 | 0 |
| Slc43a3       | 5 | 0 | 0 | 0 |
| Aplnr         | 1 | 0 | 0 | 0 |
| Gm1826        | 1 | 0 | 0 | 0 |
| Fnbp4         | 8 | 0 | 0 | 0 |
| Agbl2         | 2 | 0 | 0 | 0 |
| Mtch2         | 3 | 0 | 0 | 0 |
| Kbtbd4        | 4 | 0 | 0 | 0 |

|               |    |   |   |   |
|---------------|----|---|---|---|
| Celf1         | 1  | 0 | 0 | 0 |
| Psmc3         | 4  | 0 | 0 | 0 |
| Acp2          | 1  | 0 | 0 | 0 |
| Pacsin3       | 8  | 0 | 0 | 0 |
| Lrp4          | 6  | 0 | 0 | 0 |
| Ckap5         | 4  | 0 | 0 | 0 |
| Arhgap1       | 2  | 0 | 0 | 0 |
| Harbi1        | 3  | 0 | 0 | 0 |
| Ambra1        | 7  | 0 | 0 | 0 |
| AK039132      | 1  | 0 | 0 | 0 |
| Phf21a        | 14 | 0 | 0 | 0 |
| Pex16         | 2  | 0 | 0 | 0 |
| Chst1         | 5  | 0 | 0 | 0 |
| Syt13         | 1  | 0 | 0 | 0 |
| Trp53i11      | 3  | 0 | 0 | 0 |
| XLOC_018225   | 2  | 0 | 0 | 0 |
| Lrrc4c        | 1  | 0 | 0 | 0 |
| XLOC_018226   | 2  | 0 | 0 | 0 |
| Traf6         | 2  | 0 | 0 | 0 |
| Commd9        | 2  | 0 | 0 | 0 |
| Apip          | 3  | 0 | 0 | 0 |
| Abtb2         | 2  | 0 | 0 | 0 |
| Lmo2          | 5  | 0 | 0 | 0 |
| Fbxo3         | 2  | 0 | 0 | 0 |
| Cd59a         | 6  | 0 | 0 | 0 |
| AK015665      | 7  | 0 | 0 | 0 |
| Cstf3         | 6  | 0 | 0 | 0 |
| XLOC_018242   | 1  | 0 | 0 | 0 |
| 0610012H03Rik | 3  | 0 | 0 | 0 |
| XLOC_018249   | 2  | 0 | 0 | 0 |
| Gm14013       | 1  | 0 | 0 | 0 |
| Dcdc5         | 1  | 0 | 0 | 0 |
| Mpped2        | 8  | 0 | 0 | 0 |
| Kcna4         | 5  | 0 | 0 | 0 |
| Kif18a        | 4  | 0 | 0 | 0 |
| Bdnf          | 4  | 0 | 0 | 0 |
| Lin7c         | 2  | 0 | 0 | 0 |
| Lgr4          | 3  | 0 | 0 | 0 |
| Lpcat4        | 2  | 0 | 0 | 0 |
| Nop10         | 1  | 0 | 0 | 0 |
| Slc12a6       | 6  | 0 | 0 | 0 |
| 2900064A13Rik | 2  | 0 | 0 | 0 |
| Aven          | 1  | 0 | 0 | 0 |
| Fmn1          | 4  | 0 | 0 | 0 |
| A530058N18Rik | 2  | 0 | 0 | 0 |
| C130080G10Rik | 1  | 0 | 0 | 0 |
| BC052040      | 2  | 0 | 0 | 0 |

|               |    |   |   |   |
|---------------|----|---|---|---|
| AK083230      | 5  | 0 | 0 | 0 |
| Fam98b        | 1  | 0 | 0 | 0 |
| Eif2ak4       | 4  | 0 | 0 | 0 |
| Bub1b         | 2  | 0 | 0 | 0 |
| 5430417L22Rik | 1  | 0 | 0 | 0 |
| Disp2         | 8  | 0 | 0 | 0 |
| D2Ertd750e    | 4  | 0 | 0 | 0 |
| Ivd           | 2  | 0 | 0 | 0 |
| Bahd1         | 3  | 0 | 0 | 0 |
| Rpusd2        | 1  | 0 | 0 | 0 |
| Rad51         | 3  | 0 | 0 | 0 |
| Gchfr         | 1  | 0 | 0 | 0 |
| Zfyve19       | 5  | 0 | 0 | 0 |
| Vps18         | 2  | 0 | 0 | 0 |
| Dll4          | 2  | 0 | 0 | 0 |
| Chac1         | 3  | 0 | 0 | 0 |
| 1500003O03Rik | 4  | 0 | 0 | 0 |
| Nusap1        | 2  | 0 | 0 | 0 |
| Rtf1          | 2  | 0 | 0 | 0 |
| Tyro3         | 3  | 0 | 0 | 0 |
| Pla2g4b       | 11 | 0 | 0 | 0 |
| Capn3         | 7  | 0 | 0 | 0 |
| Snap23        | 4  | 0 | 0 | 0 |
| Haus2         | 2  | 0 | 0 | 0 |
| Stard9        | 2  | 0 | 0 | 0 |
| mKIAA1300     | 6  | 0 | 0 | 0 |
| XLOC_018324   | 6  | 0 | 0 | 0 |
| Tmem62        | 3  | 0 | 0 | 0 |
| Ccnbdp1       | 2  | 0 | 0 | 0 |
| Ckmt1         | 3  | 0 | 0 | 0 |
| Pdia3         | 1  | 0 | 0 | 0 |
| Casc4         | 3  | 0 | 0 | 0 |
| B2m           | 2  | 0 | 0 | 0 |
| Sord          | 3  | 0 | 0 | 0 |
| Spata5l1      | 1  | 0 | 0 | 0 |
| AA467197      | 3  | 0 | 0 | 0 |
| Pldn          | 2  | 0 | 0 | 0 |
| pa            | 1  | 0 | 0 | 0 |
| Sqrdl         | 2  | 0 | 0 | 0 |
| Ctxn2         | 4  | 0 | 0 | 0 |
| Dut           | 3  | 0 | 0 | 0 |
| Usp8          | 5  | 0 | 0 | 0 |
| Ap4e1         | 3  | 0 | 0 | 0 |
| Blvra         | 5  | 0 | 0 | 0 |
| Snrnp200      | 5  | 0 | 0 | 0 |
| Tmem127       | 2  | 0 | 0 | 0 |
| Stard7        | 2  | 0 | 0 | 0 |

|               |    |   |   |   |
|---------------|----|---|---|---|
| Mrps5         | 6  | 0 | 0 | 0 |
| Bcl2l11       | 4  | 0 | 0 | 0 |
| Mertk         | 6  | 0 | 0 | 0 |
| Tmem87b       | 4  | 0 | 0 | 0 |
| Fbln7         | 5  | 0 | 0 | 0 |
| Ttl           | 1  | 0 | 0 | 0 |
| Polr1b        | 3  | 0 | 0 | 0 |
| Chchd5        | 2  | 0 | 0 | 0 |
| Slc20a1       | 5  | 0 | 0 | 0 |
| Sirpa         | 6  | 0 | 0 | 0 |
| Stk35         | 4  | 0 | 0 | 0 |
| Nop56         | 5  | 0 | 0 | 0 |
| Ebf3          | 20 | 0 | 0 | 0 |
| Vps16         | 5  | 0 | 0 | 0 |
| Ptpa          | 5  | 0 | 0 | 0 |
| Mrps26        | 2  | 0 | 0 | 0 |
| Itpa          | 8  | 0 | 0 | 0 |
| XLOC_018393   | 1  | 0 | 0 | 0 |
| Atrn          | 3  | 0 | 0 | 0 |
| Cdc25b        | 6  | 0 | 0 | 0 |
| 2310035K24Rik | 3  | 0 | 0 | 0 |
| XLOC_018399   | 1  | 0 | 0 | 0 |
| Pank2         | 3  | 0 | 0 | 0 |
| Smox          | 4  | 0 | 0 | 0 |
| Cds2          | 3  | 0 | 0 | 0 |
| Chgb          | 6  | 0 | 0 | 0 |
| Mcm8          | 4  | 0 | 0 | 0 |
| Crls1         | 1  | 0 | 0 | 0 |
| Bmp2          | 2  | 0 | 0 | 0 |
| Plcb1         | 5  | 0 | 0 | 0 |
| Plcb4         | 6  | 0 | 0 | 0 |
| 6330527O06Rik | 3  | 0 | 0 | 0 |
| Snap25        | 3  | 0 | 0 | 0 |
| 2210009G21Rik | 1  | 0 | 0 | 0 |
| Btbd3         | 5  | 0 | 0 | 0 |
| Ism1          | 2  | 0 | 0 | 0 |
| 2310003L22Rik | 6  | 0 | 0 | 0 |
| Snrpb2        | 2  | 0 | 0 | 0 |
| Pcsk2         | 5  | 0 | 0 | 0 |
| Dstn          | 4  | 0 | 0 | 0 |
| LOC668917     | 8  | 0 | 0 | 0 |
| Sec23b        | 6  | 0 | 0 | 0 |
| Gm561         | 1  | 0 | 0 | 0 |
| Dtd1          | 4  | 0 | 0 | 0 |
| Slc24a3       | 2  | 0 | 0 | 0 |
| 4930529M08Rik | 7  | 0 | 0 | 0 |
| Insm1         | 1  | 0 | 0 | 0 |



|               |    |   |   |   |
|---------------|----|---|---|---|
| Xrn2          | 1  | 0 | 0 | 0 |
| Nxt1          | 2  | 0 | 0 | 0 |
| XLOC_018445   | 1  | 0 | 0 | 0 |
| Gzf1          | 3  | 0 | 0 | 0 |
| Cstl1         | 9  | 0 | 0 | 0 |
| Entpd6        | 3  | 0 | 0 | 0 |
| Pygb          | 4  | 0 | 0 | 0 |
| Gins1         | 2  | 0 | 0 | 0 |
| Fkbp1a        | 7  | 0 | 0 | 0 |
| 5430405G05Rik | 7  | 0 | 0 | 0 |
| Rspo4         | 2  | 0 | 0 | 0 |
| Csnk2a1       | 4  | 0 | 0 | 0 |
| Tbc1d20       | 4  | 0 | 0 | 0 |
| 6820408C15Rik | 4  | 0 | 0 | 0 |
| H13           | 4  | 0 | 0 | 0 |
| Id1           | 1  | 0 | 0 | 0 |
| Cox4i2        | 1  | 0 | 0 | 0 |
| Tpx2          | 9  | 0 | 0 | 0 |
| Ttl9          | 3  | 0 | 0 | 0 |
| Xkr7          | 4  | 0 | 0 | 0 |
| Hck           | 2  | 0 | 0 | 0 |
| Tm9sf4        | 2  | 0 | 0 | 0 |
| Pofut1        | 2  | 0 | 0 | 0 |
| Kif3b         | 4  | 0 | 0 | 0 |
| Asxl1         | 3  | 0 | 0 | 0 |
| Mapre1        | 1  | 0 | 0 | 0 |
| Gm14495       | 3  | 0 | 0 | 0 |
| 1700003F12Rik | 2  | 0 | 0 | 0 |
| Zfp341        | 4  | 0 | 0 | 0 |
| Chmp4b        | 3  | 0 | 0 | 0 |
| Itch          | 5  | 0 | 0 | 0 |
| Map1lc3a      | 2  | 0 | 0 | 0 |
| Trp53inp2     | 4  | 0 | 0 | 0 |
| Myh7b         | 10 | 0 | 0 | 0 |
| Mmp24         | 1  | 0 | 0 | 0 |
| Cep250        | 8  | 0 | 0 | 0 |
| Ergic3        | 5  | 0 | 0 | 0 |
| Spag4         | 7  | 0 | 0 | 0 |
| Romo1         | 2  | 0 | 0 | 0 |
| Epb4.1l1      | 8  | 0 | 0 | 0 |
| 0610011L14Rik | 3  | 0 | 0 | 0 |
| Myl9          | 2  | 0 | 0 | 0 |
| 1110008F13Rik | 3  | 0 | 0 | 0 |
| Gm1332        | 1  | 0 | 0 | 0 |
| Rpn2          | 6  | 0 | 0 | 0 |
| Manbal        | 1  | 0 | 0 | 0 |
| Src           | 11 | 0 | 0 | 0 |

|             |   |   |   |   |
|-------------|---|---|---|---|
| Peg5        | 2 | 0 | 0 | 0 |
| Ctnnbl1     | 3 | 0 | 0 | 0 |
| Vstm2l      | 2 | 0 | 0 | 0 |
| Rprd1b      | 5 | 0 | 0 | 0 |
| Snhg11      | 7 | 0 | 0 | 0 |
| Actr5       | 6 | 0 | 0 | 0 |
| Dhx35       | 4 | 0 | 0 | 0 |
| XLOC_018534 | 3 | 0 | 0 | 0 |
| Top1        | 3 | 0 | 0 | 0 |
| XLOC_018538 | 7 | 0 | 0 | 0 |
| Gm11448     | 1 | 0 | 0 | 0 |
| Srsf6       | 6 | 0 | 0 | 0 |
| Ift52       | 2 | 0 | 0 | 0 |
| Tox2        | 4 | 0 | 0 | 0 |
| XLOC_018552 | 6 | 0 | 0 | 0 |
| Ttpal       | 2 | 0 | 0 | 0 |
| Pkig        | 2 | 0 | 0 | 0 |
| Pabpc1l     | 3 | 0 | 0 | 0 |
| Stk4        | 4 | 0 | 0 | 0 |
| Sys1        | 4 | 0 | 0 | 0 |
| Dbnnd2      | 3 | 0 | 0 | 0 |
| Pigt        | 3 | 0 | 0 | 0 |
| AK043662    | 4 | 0 | 0 | 0 |
| Wfdc2       | 5 | 0 | 0 | 0 |
| Dnttip1     | 2 | 0 | 0 | 0 |
| Ube2c       | 1 | 0 | 0 | 0 |
| Snx21       | 6 | 0 | 0 | 0 |
| Zswim3      | 3 | 0 | 0 | 0 |
| Ctsa        | 3 | 0 | 0 | 0 |
| Pcif1       | 4 | 0 | 0 | 0 |
| Mmp9        | 1 | 0 | 0 | 0 |
| Slc12a5     | 1 | 0 | 0 | 0 |
| Slc2a10     | 1 | 0 | 0 | 0 |
| Eya2        | 4 | 0 | 0 | 0 |
| Trp53rk     | 1 | 0 | 0 | 0 |
| Arfgef2     | 4 | 0 | 0 | 0 |
| Cse1l       | 1 | 0 | 0 | 0 |
| Ddx27       | 2 | 0 | 0 | 0 |
| Slc9a8      | 4 | 0 | 0 | 0 |
| Rnf114      | 7 | 0 | 0 | 0 |
| Ptpn1       | 1 | 0 | 0 | 0 |
| Pard6b      | 5 | 0 | 0 | 0 |
| XLOC_018596 | 1 | 0 | 0 | 0 |
| XLOC_018599 | 5 | 0 | 0 | 0 |
| Gm9873      | 1 | 0 | 0 | 0 |
| Tshz2       | 8 | 0 | 0 | 0 |
| Pfdn4       | 5 | 0 | 0 | 0 |

|                    |   |   |   |   |
|--------------------|---|---|---|---|
| Gm14637            | 1 | 0 | 0 | 0 |
| Dok5               | 2 | 0 | 0 | 0 |
| BC049717           | 2 | 0 | 0 | 0 |
| Gm14273            | 4 | 0 | 0 | 0 |
| 2010011I20Rik      | 1 | 0 | 0 | 0 |
| Cstf1              | 2 | 0 | 0 | 0 |
| 2410001C21Rik      | 5 | 0 | 0 | 0 |
| 1700029J11Rik      | 1 | 0 | 0 | 0 |
| Rae1               | 1 | 0 | 0 | 0 |
| Rbm38              | 3 | 0 | 0 | 0 |
| AK079954           | 2 | 0 | 0 | 0 |
| Rab22a             | 2 | 0 | 0 | 0 |
| Vapb               | 5 | 0 | 0 | 0 |
| Npepl1             | 4 | 0 | 0 | 0 |
| Gnas               | 6 | 0 | 0 | 0 |
| Th1l               | 2 | 0 | 0 | 0 |
| OTTMUSG00000016609 | 3 | 0 | 0 | 0 |
| Gm14322            | 1 | 0 | 0 | 0 |
| Phactr3            | 4 | 0 | 0 | 0 |
| 9030418K01Rik      | 3 | 0 | 0 | 0 |
| Cdh26              | 2 | 0 | 0 | 0 |
| 4921531C22Rik      | 1 | 0 | 0 | 0 |
| Lsm14b             | 3 | 0 | 0 | 0 |
| Ss18l1             | 2 | 0 | 0 | 0 |
| Gtpbp5             | 7 | 0 | 0 | 0 |
| Osbpl2             | 5 | 0 | 0 | 0 |
| Adrm1              | 3 | 0 | 0 | 0 |
| Rps21              | 3 | 0 | 0 | 0 |
| 1600027N09Rik      | 8 | 0 | 0 | 0 |
| Ogfr               | 2 | 0 | 0 | 0 |
| Col9a3             | 2 | 0 | 0 | 0 |
| 2310003C23Rik      | 2 | 0 | 0 | 0 |
| XLOC_018660        | 2 | 0 | 0 | 0 |
| Rtel1              | 5 | 0 | 0 | 0 |
| Zgpat              | 8 | 0 | 0 | 0 |
| Tpd52l2            | 4 | 0 | 0 | 0 |
| Dnajc5             | 4 | 0 | 0 | 0 |
| Prpf6              | 3 | 0 | 0 | 0 |
| XLOC_018666        | 2 | 0 | 0 | 0 |
| Tcea2              | 5 | 0 | 0 | 0 |
| Oprl1              | 4 | 0 | 0 | 0 |
| Polr3k             | 1 | 0 | 0 | 0 |
| Rpp38              | 2 | 0 | 0 | 0 |
| Meig1              | 2 | 0 | 0 | 0 |
| Hspa14             | 2 | 0 | 0 | 0 |
| Prpf18             | 3 | 0 | 0 | 0 |
| Mcm10              | 6 | 0 | 0 | 0 |

|               |    |   |   |   |
|---------------|----|---|---|---|
| Optn          | 4  | 0 | 0 | 0 |
| Camk1d        | 8  | 0 | 0 | 0 |
| Cdc123        | 1  | 0 | 0 | 0 |
| Sec61a2       | 2  | 0 | 0 | 0 |
| Dhtkd1        | 7  | 0 | 0 | 0 |
| 5430407P10Rik | 6  | 0 | 0 | 0 |
| Celf2         | 9  | 0 | 0 | 0 |
| Gm13217       | 1  | 0 | 0 | 0 |
| Atp5c1        | 6  | 0 | 0 | 0 |
| Pfkfb3        | 6  | 0 | 0 | 0 |
| Rbm17         | 2  | 0 | 0 | 0 |
| Fbxo18        | 8  | 0 | 0 | 0 |
| Fam188a       | 7  | 0 | 0 | 0 |
| C1ql3         | 1  | 0 | 0 | 0 |
| Rsu1          | 3  | 0 | 0 | 0 |
| Trdmt1        | 7  | 0 | 0 | 0 |
| Ptpla         | 10 | 0 | 0 | 0 |
| Gm13320       | 1  | 0 | 0 | 0 |
| A930004D18Rik | 2  | 0 | 0 | 0 |
| Dnajc1        | 1  | 0 | 0 | 0 |
| Pip4k2a       | 5  | 0 | 0 | 0 |
| Gm13328       | 1  | 0 | 0 | 0 |
| Arhgap21      | 6  | 0 | 0 | 0 |
| Enkur         | 3  | 0 | 0 | 0 |
| Abi1          | 9  | 0 | 0 | 0 |
| Mastl         | 3  | 0 | 0 | 0 |
| Spopl         | 6  | 0 | 0 | 0 |
| Pax8          | 4  | 0 | 0 | 0 |
| Gm13416       | 1  | 0 | 0 | 0 |
| Cacna1b       | 15 | 0 | 0 | 0 |
| Arrdc1        | 4  | 0 | 0 | 0 |
| Mrpl41        | 2  | 0 | 0 | 0 |
| Cobra1        | 2  | 0 | 0 | 0 |
| Tubb2c        | 4  | 0 | 0 | 0 |
| Ndor1         | 13 | 0 | 0 | 0 |
| Grin1         | 5  | 0 | 0 | 0 |
| Dpp7          | 4  | 0 | 0 | 0 |
| Uap1l1        | 1  | 0 | 0 | 0 |
| BC029214      | 5  | 0 | 0 | 0 |
| Ptgds         | 2  | 0 | 0 | 0 |
| Mamdc4        | 5  | 0 | 0 | 0 |
| B230208H17Rik | 6  | 0 | 0 | 0 |
| Tmem141       | 6  | 0 | 0 | 0 |
| Camsap1       | 7  | 0 | 0 | 0 |
| Ubac1         | 5  | 0 | 0 | 0 |
| Nacc2         | 8  | 0 | 0 | 0 |
| Qsox2         | 4  | 0 | 0 | 0 |

|               |    |   |   |   |
|---------------|----|---|---|---|
| Card9         | 5  | 0 | 0 | 0 |
| Snhg7         | 5  | 0 | 0 | 0 |
| Surf6         | 1  | 0 | 0 | 0 |
| Surf1         | 4  | 0 | 0 | 0 |
| Rexo4         | 3  | 0 | 0 | 0 |
| Slc2a6        | 4  | 0 | 0 | 0 |
| Tmem8c        | 2  | 0 | 0 | 0 |
| VAV2          | 9  | 0 | 0 | 0 |
| Brd3          | 7  | 0 | 0 | 0 |
| Gm13373       | 5  | 0 | 0 | 0 |
| 1700007K13Rik | 1  | 0 | 0 | 0 |
| Gtf3c5        | 3  | 0 | 0 | 0 |
| Ntng2         | 8  | 0 | 0 | 0 |
| Trub2         | 3  | 0 | 0 | 0 |
| Wdr34         | 1  | 0 | 0 | 0 |
| Zer1          | 7  | 0 | 0 | 0 |
| D2Wsu81e      | 5  | 0 | 0 | 0 |
| Sh3glb2       | 7  | 0 | 0 | 0 |
| Crat          | 3  | 0 | 0 | 0 |
| XLOC_018806   | 1  | 0 | 0 | 0 |
| Asb6          | 3  | 0 | 0 | 0 |
| Ptges         | 1  | 0 | 0 | 0 |
| BC005624      | 1  | 0 | 0 | 0 |
| Fnbp1         | 12 | 0 | 0 | 0 |
| Fam78a        | 2  | 0 | 0 | 0 |
| Uck1          | 3  | 0 | 0 | 0 |
| Dnm1          | 13 | 0 | 0 | 0 |
| 1110008P14Rik | 1  | 0 | 0 | 0 |
| Lcn2          | 2  | 0 | 0 | 0 |
| Slc25a25      | 4  | 0 | 0 | 0 |
| Ttc16         | 2  | 0 | 0 | 0 |
| Garnl3        | 8  | 0 | 0 | 0 |
| Ralgps1       | 1  | 0 | 0 | 0 |
| Zbtb34        | 1  | 0 | 0 | 0 |
| Zbtb43        | 6  | 0 | 0 | 0 |
| Lmx1b         | 1  | 0 | 0 | 0 |
| Fam125b       | 5  | 0 | 0 | 0 |
| Pbx3          | 6  | 0 | 0 | 0 |
| Gapvd1        | 9  | 0 | 0 | 0 |
| Fbxw2         | 5  | 0 | 0 | 0 |
| Psm5          | 3  | 0 | 0 | 0 |
| Traf1         | 9  | 0 | 0 | 0 |
| Rab14         | 8  | 0 | 0 | 0 |
| Stom          | 2  | 0 | 0 | 0 |
| Ggta1         | 11 | 0 | 0 | 0 |
| Tll11         | 5  | 0 | 0 | 0 |
| Ndufa8        | 3  | 0 | 0 | 0 |

|             |    |   |   |   |
|-------------|----|---|---|---|
| Rbm18       | 4  | 0 | 0 | 0 |
| Gm13436     | 1  | 0 | 0 | 0 |
| Pdcl        | 2  | 0 | 0 | 0 |
| Rc3h2       | 5  | 0 | 0 | 0 |
| Zbtb6       | 5  | 0 | 0 | 0 |
| Zbtb26      | 1  | 0 | 0 | 0 |
| Strbp       | 8  | 0 | 0 | 0 |
| Dennd1a     | 8  | 0 | 0 | 0 |
| Scai        | 6  | 0 | 0 | 0 |
| Ppp6c       | 2  | 0 | 0 | 0 |
| Lrp1b       | 11 | 0 | 0 | 0 |
| Gm13461     | 1  | 0 | 0 | 0 |
| Zeb2        | 7  | 0 | 0 | 0 |
| MuORC4      | 1  | 0 | 0 | 0 |
| Mmadhc      | 5  | 0 | 0 | 0 |
| Rnd3        | 3  | 0 | 0 | 0 |
| Rbm43       | 4  | 0 | 0 | 0 |
| Arl5a       | 3  | 0 | 0 | 0 |
| Cacnb4      | 5  | 0 | 0 | 0 |
| Stam2       | 3  | 0 | 0 | 0 |
| XLOC_018884 | 1  | 0 | 0 | 0 |
| Prpf40a     | 8  | 0 | 0 | 0 |
| Nr4a2       | 6  | 0 | 0 | 0 |
| Cytip       | 1  | 0 | 0 | 0 |
| Acvr1       | 6  | 0 | 0 | 0 |
| Wdsub1      | 8  | 0 | 0 | 0 |
| Cd302       | 2  | 0 | 0 | 0 |
| Pla2r1      | 7  | 0 | 0 | 0 |
| Itgb6       | 1  | 0 | 0 | 0 |
| Rbms1       | 9  | 0 | 0 | 0 |
| Fap         | 6  | 0 | 0 | 0 |
| Ifih1       | 2  | 0 | 0 | 0 |
| Kcnh7       | 5  | 0 | 0 | 0 |
| erg3        | 1  | 0 | 0 | 0 |
| Grb14       | 2  | 0 | 0 | 0 |
| Cobll1      | 10 | 0 | 0 | 0 |
| Galnt3      | 2  | 0 | 0 | 0 |
| Ttc21b      | 3  | 0 | 0 | 0 |
| Scn1a       | 2  | 0 | 0 | 0 |
| Scn9a       | 5  | 0 | 0 | 0 |
| Scn7a       | 4  | 0 | 0 | 0 |
| Stk39       | 6  | 0 | 0 | 0 |
| Spc25       | 2  | 0 | 0 | 0 |
| Fastkd1     | 4  | 0 | 0 | 0 |
| Tlk1        | 1  | 0 | 0 | 0 |
| Mettl8      | 7  | 0 | 0 | 0 |
| Slc25a12    | 1  | 0 | 0 | 0 |

|             |    |   |   |   |
|-------------|----|---|---|---|
| Ola1        | 3  | 0 | 0 | 0 |
| Cir1        | 3  | 0 | 0 | 0 |
| Gpr155      | 5  | 0 | 0 | 0 |
| Wipf1       | 4  | 0 | 0 | 0 |
| Chrna1      | 4  | 0 | 0 | 0 |
| Chn1        | 5  | 0 | 0 | 0 |
| Atf2        | 8  | 0 | 0 | 0 |
| Atp5g3      | 4  | 0 | 0 | 0 |
| Lnp         | 4  | 0 | 0 | 0 |
| Mrpl23-ps1  | 1  | 0 | 0 | 0 |
| Gm13654     | 1  | 0 | 0 | 0 |
| Ttc30b      | 1  | 0 | 0 | 0 |
| Pde11a      | 4  | 0 | 0 | 0 |
| Prkra       | 4  | 0 | 0 | 0 |
| Fkbp7       | 5  | 0 | 0 | 0 |
| Ccdc141     | 6  | 0 | 0 | 0 |
| Sestd1      | 8  | 0 | 0 | 0 |
| Zfp385b     | 5  | 0 | 0 | 0 |
| Cwc22       | 9  | 0 | 0 | 0 |
| Cerkl       | 3  | 0 | 0 | 0 |
| Neurod1     | 1  | 0 | 0 | 0 |
| Pde1a       | 7  | 0 | 0 | 0 |
| Frzb        | 3  | 0 | 0 | 0 |
| Nckap1      | 10 | 0 | 0 | 0 |
| Gm13680     | 1  | 0 | 0 | 0 |
| Calcrl      | 3  | 0 | 0 | 0 |
| Tfpi        | 8  | 0 | 0 | 0 |
| XLOC_018972 | 1  | 0 | 0 | 0 |
| Tmx2        | 5  | 0 | 0 | 0 |
| Zdhhc5      | 2  | 0 | 0 | 0 |
| Clp1        | 2  | 0 | 0 | 0 |
| XLOC_018976 | 1  | 0 | 0 | 0 |
| Serping1    | 6  | 0 | 0 | 0 |
| Rtn4rl2     | 5  | 0 | 0 | 0 |
| P2rx3       | 11 | 0 | 0 | 0 |
| Ndufs3      | 3  | 0 | 0 | 0 |
| Ptpmt1      | 2  | 0 | 0 | 0 |
| AK020549    | 1  | 0 | 0 | 0 |
| Slc39a13    | 4  | 0 | 0 | 0 |
| Madd        | 13 | 0 | 0 | 0 |
| F2          | 1  | 0 | 0 | 0 |
| Zfp408      | 5  | 0 | 0 | 0 |
| Atg13       | 3  | 0 | 0 | 0 |
| Dgkz        | 10 | 0 | 0 | 0 |
| Creb3l1     | 5  | 0 | 0 | 0 |
| Gylt1b      | 1  | 0 | 0 | 0 |
| Mapk8ip1    | 7  | 0 | 0 | 0 |

|               |    |   |   |   |
|---------------|----|---|---|---|
| Cry2          | 6  | 0 | 0 | 0 |
| Slc35c1       | 4  | 0 | 0 | 0 |
| Prdm11        | 6  | 0 | 0 | 0 |
| Tspan18       | 2  | 0 | 0 | 0 |
| Cd82          | 3  | 0 | 0 | 0 |
| Ext2          | 5  | 0 | 0 | 0 |
| Accs          | 8  | 0 | 0 | 0 |
| Accsl         | 4  | 0 | 0 | 0 |
| Alkbh3        | 6  | 0 | 0 | 0 |
| Hsd17b12      | 2  | 0 | 0 | 0 |
| AK140370      | 1  | 0 | 0 | 0 |
| Ttc17         | 4  | 0 | 0 | 0 |
| B230118H07Rik | 1  | 0 | 0 | 0 |
| Trim44        | 4  | 0 | 0 | 0 |
| Fjx1          | 1  | 0 | 0 | 0 |
| Cd44          | 6  | 0 | 0 | 0 |
| Pdhx          | 1  | 0 | 0 | 0 |
| Ehf           | 2  | 0 | 0 | 0 |
| Cat           | 4  | 0 | 0 | 0 |
| Nat10         | 6  | 0 | 0 | 0 |
| Caprin1       | 10 | 0 | 0 | 0 |
| Hipk3         | 3  | 0 | 0 | 0 |
| Tcp11l1       | 2  | 0 | 0 | 0 |
| Depdc7        | 3  | 0 | 0 | 0 |
| Qser1         | 3  | 0 | 0 | 0 |
| Rcn1          | 1  | 0 | 0 | 0 |
| Elp4          | 4  | 0 | 0 | 0 |
| Dnajc24       | 2  | 0 | 0 | 0 |
| AK084494      | 8  | 0 | 0 | 0 |
| 2700007P21Rik | 5  | 0 | 0 | 0 |
| Fibin         | 1  | 0 | 0 | 0 |
| Ano3          | 2  | 0 | 0 | 0 |
| Tmem85        | 5  | 0 | 0 | 0 |
| Ryr3          | 20 | 0 | 0 | 0 |
| Scg5          | 3  | 0 | 0 | 0 |
| Aqr           | 1  | 0 | 0 | 0 |
| Atpbd4        | 2  | 0 | 0 | 0 |
| Meis2         | 7  | 0 | 0 | 0 |
| Rasgrp1       | 8  | 0 | 0 | 0 |
| Gpr176        | 3  | 0 | 0 | 0 |
| Srp14         | 4  | 0 | 0 | 0 |
| A430105I19Rik | 8  | 0 | 0 | 0 |
| Ccdc32        | 2  | 0 | 0 | 0 |
| Fam82a2       | 3  | 0 | 0 | 0 |
| Rhov          | 1  | 0 | 0 | 0 |
| Ino80         | 4  | 0 | 0 | 0 |
| Oip5          | 1  | 0 | 0 | 0 |



|               |    |   |   |   |
|---------------|----|---|---|---|
| Ndufaf1       | 5  | 0 | 0 | 0 |
| Rpap1         | 7  | 0 | 0 | 0 |
| Spnb5         | 21 | 0 | 0 | 0 |
| Ehd4          | 2  | 0 | 0 | 0 |
| Pla2g4e       | 6  | 0 | 0 | 0 |
| Vps39         | 4  | 0 | 0 | 0 |
| Tmem87a       | 5  | 0 | 0 | 0 |
| Zfp106        | 4  | 0 | 0 | 0 |
| Lrrc57        | 3  | 0 | 0 | 0 |
| Cdan1         | 4  | 0 | 0 | 0 |
| Ttbk2         | 4  | 0 | 0 | 0 |
| Ubr1          | 6  | 0 | 0 | 0 |
| Ppip5k1       | 5  | 0 | 0 | 0 |
| Serinc4       | 2  | 0 | 0 | 0 |
| Frmd5         | 3  | 0 | 0 | 0 |
| Duoxa1        | 7  | 0 | 0 | 0 |
| Shf           | 4  | 0 | 0 | 0 |
| Gatm          | 1  | 0 | 0 | 0 |
| Slc30a4       | 3  | 0 | 0 | 0 |
| Myef2         | 2  | 0 | 0 | 0 |
| Cep152        | 11 | 0 | 0 | 0 |
| Secisbp2l     | 6  | 0 | 0 | 0 |
| Cops2         | 3  | 0 | 0 | 0 |
| Gabpb1        | 7  | 0 | 0 | 0 |
| Trpm7         | 8  | 0 | 0 | 0 |
| 2010106G01Rik | 5  | 0 | 0 | 0 |
| Ncaph         | 2  | 0 | 0 | 0 |
| Itpripl1      | 2  | 0 | 0 | 0 |
| 1810024B03Rik | 1  | 0 | 0 | 0 |
| Ciao1         | 3  | 0 | 0 | 0 |
| Fahd2a        | 1  | 0 | 0 | 0 |
| Kcnip3        | 8  | 0 | 0 | 0 |
| Mal           | 1  | 0 | 0 | 0 |
| Mall          | 2  | 0 | 0 | 0 |
| Nphp1         | 6  | 0 | 0 | 0 |
| 1500011K16Rik | 1  | 0 | 0 | 0 |
| Gm14012       | 2  | 0 | 0 | 0 |
| Gm14005       | 6  | 0 | 0 | 0 |
| Anapc1        | 6  | 0 | 0 | 0 |
| Zc3h8         | 3  | 0 | 0 | 0 |
| AI847159      | 4  | 0 | 0 | 0 |
| Gm14045       | 1  | 0 | 0 | 0 |
| Snrpb         | 1  | 0 | 0 | 0 |
| ldh3b         | 7  | 0 | 0 | 0 |
| Ubox5         | 4  | 0 | 0 | 0 |
| Prosapip1     | 5  | 0 | 0 | 0 |
| Ddrgk1        | 3  | 0 | 0 | 0 |

|               |    |   |   |   |
|---------------|----|---|---|---|
| Slc4a11       | 10 | 0 | 0 | 0 |
| 4930402H24Rik | 8  | 0 | 0 | 0 |
| Gfra4         | 5  | 0 | 0 | 0 |
| Adam33        | 10 | 0 | 0 | 0 |
| 1700037H04Rik | 6  | 0 | 0 | 0 |
| Spef1         | 3  | 0 | 0 | 0 |
| Rnf24         | 1  | 0 | 0 | 0 |
| Adra1d        | 1  | 0 | 0 | 0 |
| Rassf2        | 4  | 0 | 0 | 0 |
| Slc23a2       | 3  | 0 | 0 | 0 |
| 5730494N06Rik | 5  | 0 | 0 | 0 |
| Pcna          | 5  | 0 | 0 | 0 |
| Prokr2        | 4  | 0 | 0 | 0 |
| Gpcpd1        | 8  | 0 | 0 | 0 |
| Trmt6         | 2  | 0 | 0 | 0 |
| Tmx4          | 2  | 0 | 0 | 0 |
| Gm14038       | 1  | 0 | 0 | 0 |
| Mkks          | 6  | 0 | 0 | 0 |
| Jag1          | 8  | 0 | 0 | 0 |
| Tasp1         | 5  | 0 | 0 | 0 |
| Esf1          | 2  | 0 | 0 | 0 |
| Snx5          | 3  | 0 | 0 | 0 |
| Ovol2         | 2  | 0 | 0 | 0 |
| Rbbp9         | 1  | 0 | 0 | 0 |
| Crnk1         | 2  | 0 | 0 | 0 |
| Thbd          | 1  | 0 | 0 | 0 |
| Cd93          | 2  | 0 | 0 | 0 |
| Napb          | 4  | 0 | 0 | 0 |
| Cst3          | 1  | 0 | 0 | 0 |
| Zfp120        | 5  | 0 | 0 | 0 |
| Gm14127       | 1  | 0 | 0 | 0 |
| Gm14121       | 1  | 0 | 0 | 0 |
| 2310001A20Rik | 3  | 0 | 0 | 0 |
| Acss1         | 4  | 0 | 0 | 0 |
| Abhd12        | 2  | 0 | 0 | 0 |
| Ninl          | 9  | 0 | 0 | 0 |
| Snph          | 8  | 0 | 0 | 0 |
| Psmf1         | 1  | 0 | 0 | 0 |
| Fam110a       | 1  | 0 | 0 | 0 |
| Gm14166       | 1  | 0 | 0 | 0 |
| Rbck1         | 6  | 0 | 0 | 0 |
| Trib3         | 3  | 0 | 0 | 0 |
| Nrsn2         | 2  | 0 | 0 | 0 |
| Sox12         | 1  | 0 | 0 | 0 |
| Bcl2l1        | 5  | 0 | 0 | 0 |
| Foxs1         | 1  | 0 | 0 | 0 |
| Dusp15        | 3  | 0 | 0 | 0 |

|               |   |   |   |   |
|---------------|---|---|---|---|
| Pdrg1         | 7 | 0 | 0 | 0 |
| Tspyl3        | 1 | 0 | 0 | 0 |
| Plagl2        | 4 | 0 | 0 | 0 |
| AK010870      | 7 | 0 | 0 | 0 |
| 8430427H17Rik | 7 | 0 | 0 | 0 |
| Commd7        | 1 | 0 | 0 | 0 |
| Cdk5rap1      | 3 | 0 | 0 | 0 |
| Snta1         | 2 | 0 | 0 | 0 |
| Necab3        | 9 | 0 | 0 | 0 |
| Pxmp4         | 3 | 0 | 0 | 0 |
| Pigu          | 3 | 0 | 0 | 0 |
| Ncoa6         | 3 | 0 | 0 | 0 |
| Ggt7          | 2 | 0 | 0 | 0 |
| Gss           | 1 | 0 | 0 | 0 |
| Trpc4ap       | 4 | 0 | 0 | 0 |
| Edem2         | 4 | 0 | 0 | 0 |
| Uqcc          | 9 | 0 | 0 | 0 |
| 6430550D23Rik | 4 | 0 | 0 | 0 |
| Cpne1         | 5 | 0 | 0 | 0 |
| Nfs1          | 3 | 0 | 0 | 0 |
| Rbm39         | 5 | 0 | 0 | 0 |
| AK015092      | 9 | 0 | 0 | 0 |
| Gm14230       | 4 | 0 | 0 | 0 |
| Ndr3          | 4 | 0 | 0 | 0 |
| Dsn1          | 4 | 0 | 0 | 0 |
| 9830001H06Rik | 4 | 0 | 0 | 0 |
| Samhd1        | 4 | 0 | 0 | 0 |
| 4922505G16Rik | 1 | 0 | 0 | 0 |
| Gm14286       | 6 | 0 | 0 | 0 |
| Blcap         | 3 | 0 | 0 | 0 |
| Tti1          | 2 | 0 | 0 | 0 |
| Tgm2          | 1 | 0 | 0 | 0 |
| 9430008C03Rik | 9 | 0 | 0 | 0 |
| Mafb          | 1 | 0 | 0 | 0 |
| Zhx3          | 2 | 0 | 0 | 0 |
| Chd6          | 5 | 0 | 0 | 0 |
| Ptprt         | 7 | 0 | 0 | 0 |
| Gm11451       | 1 | 0 | 0 | 0 |
| Fitm2         | 4 | 0 | 0 | 0 |
| Serinc3       | 2 | 0 | 0 | 0 |
| Ada           | 5 | 0 | 0 | 0 |
| Rims4         | 3 | 0 | 0 | 0 |
| Tomm34        | 5 | 0 | 0 | 0 |
| Wfdc5         | 2 | 0 | 0 | 0 |
| Slpi          | 1 | 0 | 0 | 0 |
| Matn4         | 4 | 0 | 0 | 0 |
| Spinlw1       | 1 | 0 | 0 | 0 |

|               |    |   |   |   |
|---------------|----|---|---|---|
| Acot8         | 1  | 0 | 0 | 0 |
| Pltp          | 2  | 0 | 0 | 0 |
| Zfp335        | 7  | 0 | 0 | 0 |
| Ncoa5         | 3  | 0 | 0 | 0 |
| Slc35c2       | 6  | 0 | 0 | 0 |
| Elmo2         | 4  | 0 | 0 | 0 |
| Zfp334        | 3  | 0 | 0 | 0 |
| Slc13a3       | 3  | 0 | 0 | 0 |
| 2810408M09Rik | 1  | 0 | 0 | 0 |
| Gm11460       | 1  | 0 | 0 | 0 |
| Zmynd8        | 15 | 0 | 0 | 0 |
| Sulf2         | 5  | 0 | 0 | 0 |
| Gm14267       | 6  | 0 | 0 | 0 |
| Stau1         | 3  | 0 | 0 | 0 |
| Gm11470       | 2  | 0 | 0 | 0 |
| Znfx1         | 5  | 0 | 0 | 0 |
| Kcnb1         | 5  | 0 | 0 | 0 |
| B4galt5       | 7  | 0 | 0 | 0 |
| Spata2        | 4  | 0 | 0 | 0 |
| Tmem189       | 2  | 0 | 0 | 0 |
| Adnp          | 4  | 0 | 0 | 0 |
| Atp9a         | 9  | 0 | 0 | 0 |
| Zfp64         | 3  | 0 | 0 | 0 |
| XLOC_019370   | 3  | 0 | 0 | 0 |
| Bcas1         | 4  | 0 | 0 | 0 |
| Aurka         | 2  | 0 | 0 | 0 |
| Bmp7          | 4  | 0 | 0 | 0 |
| Ctcf1         | 1  | 0 | 0 | 0 |
| Zbp1          | 7  | 0 | 0 | 0 |
| Pmepa1        | 1  | 0 | 0 | 0 |
| Ppp4r1l-ps    | 14 | 0 | 0 | 0 |
| Ctsz          | 2  | 0 | 0 | 0 |
| Atp5e         | 1  | 0 | 0 | 0 |
| Slmo2         | 3  | 0 | 0 | 0 |
| Gm14326       | 4  | 0 | 0 | 0 |
| Ppp1r3d       | 1  | 0 | 0 | 0 |
| Taf4a         | 7  | 0 | 0 | 0 |
| Psm7          | 6  | 0 | 0 | 0 |
| Cables2       | 10 | 0 | 0 | 0 |
| AK045814      | 11 | 0 | 0 | 0 |
| Dido1         | 6  | 0 | 0 | 0 |
| Nkain4        | 1  | 0 | 0 | 0 |
| Eef1a2        | 4  | 0 | 0 | 0 |
| Srms          | 2  | 0 | 0 | 0 |
| BC006779      | 11 | 0 | 0 | 0 |
| Gmeb2         | 2  | 0 | 0 | 0 |
| Stmn3         | 7  | 0 | 0 | 0 |

|               |   |   |   |   |
|---------------|---|---|---|---|
| Arfrp1        | 2 | 0 | 0 | 0 |
| Znf512b       | 8 | 0 | 0 | 0 |
| Samd10        | 4 | 0 | 0 | 0 |
| Rgs19         | 2 | 0 | 0 | 0 |
| Acbd7         | 3 | 0 | 0 | 0 |
| Nudt5         | 3 | 0 | 0 | 0 |
| XLOC_017895   | 1 | 0 | 0 | 0 |
| XLOC_017896   | 1 | 0 | 0 | 0 |
| XLOC_017921   | 4 | 0 | 0 | 0 |
| Wdr85         | 2 | 0 | 0 | 0 |
| mKIAA1422     | 1 | 0 | 0 | 0 |
| XLOC_017948   | 1 | 0 | 0 | 0 |
| AK075572      | 1 | 0 | 0 | 0 |
| Surf2         | 1 | 0 | 0 | 0 |
| Gm711         | 2 | 0 | 0 | 0 |
| Ddx31         | 5 | 0 | 0 | 0 |
| Set           | 4 | 0 | 0 | 0 |
| Phyhd1        | 1 | 0 | 0 | 0 |
| Golga2        | 2 | 0 | 0 | 0 |
| D730039F16Rik | 1 | 0 | 0 | 0 |
| AK163151      | 1 | 0 | 0 | 0 |
| Gm13474       | 2 | 0 | 0 | 0 |
| Gm13558       | 1 | 0 | 0 | 0 |
| AK050909      | 4 | 0 | 0 | 0 |
| XLOC_018108   | 2 | 0 | 0 | 0 |
| Phospho2      | 3 | 0 | 0 | 0 |
| XLOC_018136   | 1 | 0 | 0 | 0 |
| AK013593      | 1 | 0 | 0 | 0 |
| Hoxd9         | 2 | 0 | 0 | 0 |
| Hoxd4         | 1 | 0 | 0 | 0 |
| Hoxd1         | 1 | 0 | 0 | 0 |
| XLOC_018168   | 1 | 0 | 0 | 0 |
| SKRP1         | 2 | 0 | 0 | 0 |
| Dusp19        | 3 | 0 | 0 | 0 |
| Ssrp1         | 3 | 0 | 0 | 0 |
| Nup160        | 2 | 0 | 0 | 0 |
| A330069E16Rik | 1 | 0 | 0 | 0 |
| Arfgap2       | 3 | 0 | 0 | 0 |
| Chrm4         | 1 | 0 | 0 | 0 |
| Wt1           | 3 | 0 | 0 | 0 |
| 2410042D21Rik | 1 | 0 | 0 | 0 |
| XLOC_018297   | 1 | 0 | 0 | 0 |
| Gm14088       | 1 | 0 | 0 | 0 |
| Mga           | 9 | 0 | 0 | 0 |
| Adal          | 3 | 0 | 0 | 0 |
| Sema6d        | 3 | 0 | 0 | 0 |
| Galk2         | 5 | 0 | 0 | 0 |

|               |   |   |   |   |
|---------------|---|---|---|---|
| Gpat2         | 1 | 0 | 0 | 0 |
| Hspa12b       | 1 | 0 | 0 | 0 |
| Prnp          | 1 | 0 | 0 | 0 |
| Gm14051       | 2 | 0 | 0 | 0 |
| 1110034G24Rik | 1 | 0 | 0 | 0 |
| AK042765      | 1 | 0 | 0 | 0 |
| XLOC_018427   | 2 | 0 | 0 | 0 |
| Zfp937        | 1 | 0 | 0 | 0 |
| Sdcbp2        | 2 | 0 | 0 | 0 |
| Rem1          | 3 | 0 | 0 | 0 |
| XLOC_018486   | 4 | 0 | 0 | 0 |
| Cbfa2t2       | 4 | 0 | 0 | 0 |
| XLOC_018498   | 1 | 0 | 0 | 0 |
| Acss2         | 5 | 0 | 0 | 0 |
| Phf20         | 9 | 0 | 0 | 0 |
| Nnat          | 2 | 0 | 0 | 0 |
| Zswim1        | 2 | 0 | 0 | 0 |
| Ncoa3         | 2 | 0 | 0 | 0 |
| 1500012F01Rik | 2 | 0 | 0 | 0 |
| AY672066      | 2 | 0 | 0 | 0 |
| Snai1         | 2 | 0 | 0 | 0 |
| Gm14321       | 1 | 0 | 0 | 0 |
| XLOC_018597   | 1 | 0 | 0 | 0 |
| Gm14403       | 3 | 0 | 0 | 0 |
| XLOC_018636   | 1 | 0 | 0 | 0 |
| Arfgap1       | 5 | 0 | 0 | 0 |
| Pdpf          | 8 | 0 | 0 | 0 |
| Pcmt2         | 2 | 0 | 0 | 0 |
| Suv39h2       | 3 | 0 | 0 | 0 |
| Cubn          | 7 | 0 | 0 | 0 |
| Nsun6         | 7 | 0 | 0 | 0 |
| Ssna1         | 2 | 0 | 0 | 0 |
| C8g           | 2 | 0 | 0 | 0 |
| Dnlz          | 1 | 0 | 0 | 0 |
| Sdccag3       | 3 | 0 | 0 | 0 |
| Inpp5e        | 5 | 0 | 0 | 0 |
| Sec16a        | 7 | 0 | 0 | 0 |
| Med22         | 1 | 0 | 0 | 0 |
| Surf4         | 1 | 0 | 0 | 0 |
| Gtf3c4        | 1 | 0 | 0 | 0 |
| AK076583      | 1 | 0 | 0 | 0 |
| 2900010J23Rik | 1 | 0 | 0 | 0 |
| Lrsam1        | 3 | 0 | 0 | 0 |
| Slc2a8        | 8 | 0 | 0 | 0 |
| Rabepk        | 2 | 0 | 0 | 0 |
| XLOC_018851   | 1 | 0 | 0 | 0 |
| Orc4          | 2 | 0 | 0 | 0 |

|               |   |   |   |   |
|---------------|---|---|---|---|
| Nmi           | 7 | 0 | 0 | 0 |
| XLOC_018887   | 1 | 0 | 0 | 0 |
| AK044432      | 1 | 0 | 0 | 0 |
| 4930578N16Rik | 6 | 0 | 0 | 0 |
| mKIAA0137     | 4 | 0 | 0 | 0 |
| AK086439      | 3 | 0 | 0 | 0 |
| 6720416L17Rik | 1 | 0 | 0 | 0 |
| Nr1h3         | 7 | 0 | 0 | 0 |
| Ddb2          | 2 | 0 | 0 | 0 |
| Mdk           | 2 | 0 | 0 | 0 |
| XLOC_019024   | 1 | 0 | 0 | 0 |
| XLOC_019035   | 1 | 0 | 0 | 0 |
| XLOC_019054   | 1 | 0 | 0 | 0 |
| Trp53bp1      | 7 | 0 | 0 | 0 |
| Shc4          | 4 | 0 | 0 | 0 |
| Usp50         | 2 | 0 | 0 | 0 |
| XLOC_019158   | 3 | 0 | 0 | 0 |
| A730017L22Rik | 4 | 0 | 0 | 0 |
| mADAM33-alpha | 1 | 0 | 0 | 0 |
| Lrrn4         | 2 | 0 | 0 | 0 |
| AK035754      | 2 | 0 | 0 | 0 |
| Rrbp1         | 7 | 0 | 0 | 0 |
| 6330439K17Rik | 8 | 0 | 0 | 0 |
| AA387200      | 2 | 0 | 0 | 0 |
| 5430405H02Rik | 2 | 0 | 0 | 0 |
| Gm826         | 1 | 0 | 0 | 0 |
| Jph2          | 2 | 0 | 0 | 0 |
| XLOC_019330   | 1 | 0 | 0 | 0 |
| Wfdc6a        | 1 | 0 | 0 | 0 |
| Gm14325       | 1 | 0 | 0 | 0 |
| Tcf15         | 2 | 0 | 0 | 0 |
| Kcnq2         | 7 | 0 | 0 | 0 |
| Uck1          | 1 | 0 | 0 | 0 |
| XLOC_017869   | 1 | 0 | 0 | 0 |
| XLOC_017891   | 1 | 0 | 0 | 0 |
| Gm13318       | 1 | 0 | 0 | 0 |
| XLOC_017906   | 1 | 0 | 0 | 0 |
| Il1f9         | 2 | 0 | 0 | 0 |
| XLOC_017964   | 1 | 0 | 0 | 0 |
| Pkn3          | 1 | 0 | 0 | 0 |
| Nup188        | 5 | 0 | 0 | 0 |
| Dolpp1        | 1 | 0 | 0 | 0 |
| Sh2d3c        | 5 | 0 | 0 | 0 |
| AK147796      | 1 | 0 | 0 | 0 |
| Morn5         | 2 | 0 | 0 | 0 |
| AK142467      | 1 | 0 | 0 | 0 |
| AK079699      | 1 | 0 | 0 | 0 |

|               |   |   |   |   |
|---------------|---|---|---|---|
| XLOC_018090   | 1 | 0 | 0 | 0 |
| XLOC_018101   | 2 | 0 | 0 | 0 |
| XLOC_018112   | 1 | 0 | 0 | 0 |
| XLOC_018113   | 1 | 0 | 0 | 0 |
| Hoxd10        | 3 | 0 | 0 | 0 |
| Hoxd8         | 2 | 0 | 0 | 0 |
| XLOC_018169   | 1 | 0 | 0 | 0 |
| Gm13884       | 1 | 0 | 0 | 0 |
| AK019067      | 1 | 0 | 0 | 0 |
| 1700020I14Rik | 4 | 0 | 0 | 0 |
| Tubgcp4       | 1 | 0 | 0 | 0 |
| Mtap1a        | 3 | 0 | 0 | 0 |
| XLOC_018370   | 2 | 0 | 0 | 0 |
| AK042010      | 3 | 0 | 0 | 0 |
| XLOC_018401   | 1 | 0 | 0 | 0 |
| Polr3f        | 1 | 0 | 0 | 0 |
| RP23-125A1.2  | 2 | 0 | 0 | 0 |
| XLOC_018443   | 1 | 0 | 0 | 0 |
| Gm10130       | 1 | 0 | 0 | 0 |
| Gm14165       | 1 | 0 | 0 | 0 |
| Dnmt3b        | 2 | 0 | 0 | 0 |
| Lpin3         | 2 | 0 | 0 | 0 |
| Rbpjl         | 3 | 0 | 0 | 0 |
| Cd40          | 1 | 0 | 0 | 0 |
| XLOC_018620   | 3 | 0 | 0 | 0 |
| Col20a1       | 8 | 0 | 0 | 0 |
| XLOC_018659   | 1 | 0 | 0 | 0 |
| Itih2         | 1 | 0 | 0 | 0 |
| XLOC_018712   | 1 | 0 | 0 | 0 |
| Zdhhc12       | 1 | 0 | 0 | 0 |
| Hc            | 4 | 0 | 0 | 0 |
| Lhx6          | 1 | 0 | 0 | 0 |
| Gm13470       | 1 | 0 | 0 | 0 |
| Figf          | 1 | 0 | 0 | 0 |
| Lrrc55        | 2 | 0 | 0 | 0 |
| XLOC_018989   | 1 | 0 | 0 | 0 |
| Api5          | 2 | 0 | 0 | 0 |
| Prr5l         | 1 | 0 | 0 | 0 |
| Fsip1         | 2 | 0 | 0 | 0 |
| XLOC_019083   | 1 | 0 | 0 | 0 |
| Ckap2l        | 2 | 0 | 0 | 0 |
| Siglec1       | 3 | 0 | 0 | 0 |
| Mzf31         | 1 | 0 | 0 | 0 |
| ZIPO-III      | 1 | 0 | 0 | 0 |
| XLOC_019266   | 1 | 0 | 0 | 0 |
| Eif6          | 1 | 0 | 0 | 0 |
| Rbm12         | 1 | 0 | 0 | 0 |



|               |   |   |   |   |
|---------------|---|---|---|---|
| Rbl1          | 5 | 0 | 0 | 0 |
| Cbln4         | 1 | 0 | 0 | 0 |
| XLOC_019397   | 3 | 0 | 0 | 0 |
| Sox18         | 1 | 0 | 0 | 0 |
| AK140161      | 1 | 0 | 0 | 0 |
| XLOC_017926   | 2 | 0 | 0 | 0 |
| Ang           | 1 | 0 | 0 | 0 |
| Tor1b         | 2 | 0 | 0 | 0 |
| Hmcn2         | 1 | 0 | 0 | 0 |
| Ptgs1         | 2 | 0 | 0 | 0 |
| XLOC_018092   | 1 | 0 | 0 | 0 |
| Gad1          | 1 | 0 | 0 | 0 |
| XLOC_018166   | 1 | 0 | 0 | 0 |
| Slc43a1       | 1 | 0 | 0 | 0 |
| Fba           | 1 | 0 | 0 | 0 |
| XLOC_018282   | 1 | 0 | 0 | 0 |
| XLOC_018295   | 2 | 0 | 0 | 0 |
| Gm14138       | 1 | 0 | 0 | 0 |
| Ganc          | 1 | 0 | 0 | 0 |
| Slc24a5       | 1 | 0 | 0 | 0 |
| Dusp2         | 2 | 0 | 0 | 0 |
| 8430406I07Rik | 1 | 0 | 0 | 0 |
| Naa20         | 3 | 0 | 0 | 0 |
| XLOC_018456   | 1 | 0 | 0 | 0 |
| Gm14240       | 1 | 0 | 0 | 0 |
| Wisp2         | 2 | 0 | 0 | 0 |
| Gm14249       | 1 | 0 | 0 | 0 |
| XLOC_018612   | 2 | 0 | 0 | 0 |
| Edn3          | 3 | 0 | 0 | 0 |
| XLOC_018630   | 1 | 0 | 0 | 0 |
| Ntsr1         | 1 | 0 | 0 | 0 |
| Cel           | 1 | 0 | 0 | 0 |
| XLOC_018793   | 2 | 0 | 0 | 0 |
| AK138941      | 1 | 0 | 0 | 0 |
| Tor1a         | 1 | 0 | 0 | 0 |
| GLUTX1        | 1 | 0 | 0 | 0 |
| AK166079      | 3 | 0 | 0 | 0 |
| 1700109F18Rik | 1 | 0 | 0 | 0 |
| Ptprj         | 2 | 0 | 0 | 0 |
| XLOC_019019   | 2 | 0 | 0 | 0 |
| Pin1-ps1      | 1 | 0 | 0 | 0 |
| Plcb2         | 2 | 0 | 0 | 0 |
| Dnajc17       | 1 | 0 | 0 | 0 |
| Duox2         | 1 | 0 | 0 | 0 |
| XLOC_019156   | 1 | 0 | 0 | 0 |
| Gm14029       | 2 | 0 | 0 | 0 |
| Cpxm1         | 2 | 0 | 0 | 0 |

|               |   |   |   |   |
|---------------|---|---|---|---|
| XLOC_019171   | 1 | 0 | 0 | 0 |
| Fastkd5       | 1 | 0 | 0 | 0 |
| XLOC_019201   | 1 | 0 | 0 | 0 |
| XLOC_019220   | 2 | 0 | 0 | 0 |
| BC029722      | 1 | 0 | 0 | 0 |
| XLOC_019314   | 1 | 0 | 0 | 0 |
| Kcns1         | 2 | 0 | 0 | 0 |
| Sycp2         | 4 | 0 | 0 | 0 |
| Kin           | 1 | 0 | 0 | 0 |
| XLOC_017912   | 1 | 0 | 0 | 0 |
| Il1rn         | 1 | 0 | 0 | 0 |
| Fam129b       | 1 | 0 | 0 | 0 |
| XLOC_018060   | 1 | 0 | 0 | 0 |
| XLOC_018078   | 1 | 0 | 0 | 0 |
| XLOC_018110   | 1 | 0 | 0 | 0 |
| XLOC_018309   | 1 | 0 | 0 | 0 |
| ltpka         | 1 | 0 | 0 | 0 |
| XLOC_018386   | 2 | 0 | 0 | 0 |
| XLOC_018390   | 3 | 0 | 0 | 0 |
| XLOC_018506   | 1 | 0 | 0 | 0 |
| Mybl2         | 1 | 0 | 0 | 0 |
| AK082432      | 1 | 0 | 0 | 0 |
| XLOC_018549   | 1 | 0 | 0 | 0 |
| 1810053B01Rik | 1 | 0 | 0 | 0 |
| Gm14291       | 1 | 0 | 0 | 0 |
| AK027991      | 2 | 0 | 0 | 0 |
| XLOC_018605   | 1 | 0 | 0 | 0 |
| BC086906      | 2 | 0 | 0 | 0 |
| Etohi1        | 1 | 0 | 0 | 0 |
| Gm13340       | 1 | 0 | 0 | 0 |
| Snapc4        | 4 | 0 | 0 | 0 |
| AK138201      | 3 | 0 | 0 | 0 |
| Lrp2          | 2 | 0 | 0 | 0 |
| Mettl5        | 1 | 0 | 0 | 0 |
| XLOC_018931   | 1 | 0 | 0 | 0 |
| XLOC_018948   | 1 | 0 | 0 | 0 |
| Prrg4         | 1 | 0 | 0 | 0 |
| AK030357      | 1 | 0 | 0 | 0 |
| Prom2         | 1 | 0 | 0 | 0 |
| Ptgis         | 3 | 0 | 0 | 0 |
| AK166773      | 2 | 0 | 0 | 0 |
| XLOC_017947   | 1 | 0 | 0 | 0 |
| Cercam        | 3 | 0 | 0 | 0 |
| Prrx2         | 1 | 0 | 0 | 0 |
| 4933404M02Rik | 1 | 0 | 0 | 0 |
| XLOC_018163   | 1 | 0 | 0 | 0 |
| Gm13715       | 1 | 0 | 0 | 0 |

|               |    |   |   |   |
|---------------|----|---|---|---|
| XLOC_018244   | 1  | 0 | 0 | 0 |
| XLOC_018273   | 1  | 0 | 0 | 0 |
| XLOC_018316   | 1  | 0 | 0 | 0 |
| Gm14085       | 1  | 0 | 0 | 0 |
| XLOC_018349   | 1  | 0 | 0 | 0 |
| Slc12a1       | 1  | 0 | 0 | 0 |
| XLOC_018395   | 1  | 0 | 0 | 0 |
| Tgif2         | 2  | 0 | 0 | 0 |
| 9230111E07Rik | 1  | 0 | 0 | 0 |
| Echdc3        | 1  | 0 | 0 | 0 |
| XLOC_018693   | 1  | 0 | 0 | 0 |
| Gm996         | 1  | 0 | 0 | 0 |
| AK048710      | 1  | 0 | 0 | 0 |
| Gm13582       | 1  | 0 | 0 | 0 |
| XLOC_018962   | 1  | 0 | 0 | 0 |
| XLOC_019031   | 1  | 0 | 0 | 0 |
| 4930525F21Rik | 1  | 0 | 0 | 0 |
| Dpm1          | 1  | 0 | 0 | 0 |
| Nfatc2        | 1  | 0 | 0 | 0 |
| Zfhx4         | 1  | 0 | 0 | 0 |
| Pkia          | 3  | 0 | 0 | 0 |
| Fam164a       | 1  | 0 | 0 | 0 |
| Stmn2         | 1  | 0 | 0 | 0 |
| Zbtb10        | 2  | 0 | 0 | 0 |
| XLOC_020752   | 2  | 0 | 0 | 0 |
| Fabp5         | 3  | 0 | 0 | 0 |
| Lrrcc1        | 2  | 0 | 0 | 0 |
| E2f5          | 2  | 0 | 0 | 0 |
| Car13         | 4  | 0 | 0 | 0 |
| Car2          | 3  | 0 | 0 | 0 |
| Ythdf3        | 4  | 0 | 0 | 0 |
| 2610100L16Rik | 5  | 0 | 0 | 0 |
| Mtfr1         | 3  | 0 | 0 | 0 |
| Dnajc5b       | 6  | 0 | 0 | 0 |
| Cp            | 3  | 0 | 0 | 0 |
| XLOC_020778   | 7  | 0 | 0 | 0 |
| Tbl1xr1       | 6  | 0 | 0 | 0 |
| Nceh1         | 1  | 0 | 0 | 0 |
| Tnik          | 5  | 0 | 0 | 0 |
| Eif5a2        | 2  | 0 | 0 | 0 |
| Rpl22l1       | 7  | 0 | 0 | 0 |
| XLOC_020790   | 4  | 0 | 0 | 0 |
| Mynn          | 2  | 0 | 0 | 0 |
| Sec62         | 1  | 0 | 0 | 0 |
| Gpr160        | 12 | 0 | 0 | 0 |
| Prkci         | 4  | 0 | 0 | 0 |
| Skil          | 3  | 0 | 0 | 0 |

|               |    |   |   |   |
|---------------|----|---|---|---|
| Cldn11        | 1  | 0 | 0 | 0 |
| AK162138      | 4  | 0 | 0 | 0 |
| Pik3ca        | 3  | 0 | 0 | 0 |
| Zfp639        | 4  | 0 | 0 | 0 |
| Mfn1          | 4  | 0 | 0 | 0 |
| Actl6a        | 2  | 0 | 0 | 0 |
| Ndufb5        | 3  | 0 | 0 | 0 |
| Usp13         | 7  | 0 | 0 | 0 |
| Fxr1          | 5  | 0 | 0 | 0 |
| Sox2          | 1  | 0 | 0 | 0 |
| Atp11b        | 6  | 0 | 0 | 0 |
| Gm15952       | 1  | 0 | 0 | 0 |
| Acad9         | 2  | 0 | 0 | 0 |
| D3Erttd254e   | 1  | 0 | 0 | 0 |
| Exosc9        | 1  | 0 | 0 | 0 |
| 4932438A13Rik | 10 | 0 | 0 | 0 |
| Gm12582       | 1  | 0 | 0 | 0 |
| Fgf2          | 2  | 0 | 0 | 0 |
| Spata5        | 6  | 0 | 0 | 0 |
| Intu          | 4  | 0 | 0 | 0 |
| Hspa4l        | 3  | 0 | 0 | 0 |
| 3110057012Rik | 5  | 0 | 0 | 0 |
| Larp1b        | 6  | 0 | 0 | 0 |
| Phf17         | 9  | 0 | 0 | 0 |
| D3Erttd751e   | 4  | 0 | 0 | 0 |
| Pcdh10        | 5  | 0 | 0 | 0 |
| XLOC_020839   | 1  | 0 | 0 | 0 |
| Ccrn4l        | 1  | 0 | 0 | 0 |
| Naa15         | 5  | 0 | 0 | 0 |
| Rab33b        | 3  | 0 | 0 | 0 |
| Mgst2         | 4  | 0 | 0 | 0 |
| Foxo1         | 1  | 0 | 0 | 0 |
| Lhfp          | 3  | 0 | 0 | 0 |
| 2810046L04Rik | 3  | 0 | 0 | 0 |
| Trpc4         | 7  | 0 | 0 | 0 |
| Alg5          | 1  | 0 | 0 | 0 |
| Smad9         | 1  | 0 | 0 | 0 |
| Spg20         | 5  | 0 | 0 | 0 |
| Dclk1         | 4  | 0 | 0 | 0 |
| Rnf13         | 1  | 0 | 0 | 0 |
| Tsc22d2       | 3  | 0 | 0 | 0 |
| Eif2a         | 5  | 0 | 0 | 0 |
| 2810407C02Rik | 4  | 0 | 0 | 0 |
| AK016388      | 1  | 0 | 0 | 0 |
| Arhgef26      | 1  | 0 | 0 | 0 |
| Mme           | 6  | 0 | 0 | 0 |
| Gmps          | 2  | 0 | 0 | 0 |

|               |    |   |   |   |
|---------------|----|---|---|---|
| Tiparp        | 2  | 0 | 0 | 0 |
| Lekr1         | 8  | 0 | 0 | 0 |
| Rsrc1         | 3  | 0 | 0 | 0 |
| Mlf1          | 2  | 0 | 0 | 0 |
| Gfm1          | 1  | 0 | 0 | 0 |
| Mfsd1         | 1  | 0 | 0 | 0 |
| lqcj          | 1  | 0 | 0 | 0 |
| Schip1        | 2  | 0 | 0 | 0 |
| Smc4          | 3  | 0 | 0 | 0 |
| Ppm1l         | 4  | 0 | 0 | 0 |
| Nmd3          | 1  | 0 | 0 | 0 |
| Serpini1      | 3  | 0 | 0 | 0 |
| XLOC_020896   | 1  | 0 | 0 | 0 |
| Fstl5         | 4  | 0 | 0 | 0 |
| 4930579G24Rik | 2  | 0 | 0 | 0 |
| Fam198b       | 4  | 0 | 0 | 0 |
| Pdgfc         | 3  | 0 | 0 | 0 |
| Mtap9         | 4  | 0 | 0 | 0 |
| Fgg           | 3  | 0 | 0 | 0 |
| Plrg1         | 2  | 0 | 0 | 0 |
| Tmem154       | 4  | 0 | 0 | 0 |
| Fbxw7         | 4  | 0 | 0 | 0 |
| Pet112l       | 1  | 0 | 0 | 0 |
| Sh3d19        | 5  | 0 | 0 | 0 |
| AK080030      | 1  | 0 | 0 | 0 |
| Lrba          | 9  | 0 | 0 | 0 |
| Etv3          | 3  | 0 | 0 | 0 |
| XLOC_020921   | 3  | 0 | 0 | 0 |
| Arhgef11      | 10 | 0 | 0 | 0 |
| Insrr         | 5  | 0 | 0 | 0 |
| Hdgf          | 5  | 0 | 0 | 0 |
| Isg20l2       | 2  | 0 | 0 | 0 |
| Crabp2        | 1  | 0 | 0 | 0 |
| Nes           | 2  | 0 | 0 | 0 |
| Gpatch4       | 2  | 0 | 0 | 0 |
| Iqgap3        | 4  | 0 | 0 | 0 |
| Mef2d         | 5  | 0 | 0 | 0 |
| 0610031J06Rik | 2  | 0 | 0 | 0 |
| Smg5          | 4  | 0 | 0 | 0 |
| Paqr6         | 8  | 0 | 0 | 0 |
| Mex3a         | 1  | 0 | 0 | 0 |
| Ubqln4        | 3  | 0 | 0 | 0 |
| Ssr2          | 2  | 0 | 0 | 0 |
| Arhgef2       | 9  | 0 | 0 | 0 |
| 2810403A07Rik | 5  | 0 | 0 | 0 |
| Rit1          | 3  | 0 | 0 | 0 |
| Ash1l         | 4  | 0 | 0 | 0 |

|               |    |   |   |   |
|---------------|----|---|---|---|
| Clk2          | 7  | 0 | 0 | 0 |
| Fam189b       | 2  | 0 | 0 | 0 |
| Thbs3         | 8  | 0 | 0 | 0 |
| Dpm3          | 2  | 0 | 0 | 0 |
| Pmvk          | 3  | 0 | 0 | 0 |
| Kcnn3         | 1  | 0 | 0 | 0 |
| Ube2q1        | 2  | 0 | 0 | 0 |
| She           | 2  | 0 | 0 | 0 |
| 4933434E20Rik | 5  | 0 | 0 | 0 |
| Nup210l       | 6  | 0 | 0 | 0 |
| Rab13         | 2  | 0 | 0 | 0 |
| Jtb           | 1  | 0 | 0 | 0 |
| Slc39a1       | 1  | 0 | 0 | 0 |
| Crtc2         | 2  | 0 | 0 | 0 |
| Dennd4b       | 4  | 0 | 0 | 0 |
| Ilf2          | 1  | 0 | 0 | 0 |
| S100a13       | 5  | 0 | 0 | 0 |
| S100a16       | 4  | 0 | 0 | 0 |
| S100a3        | 5  | 0 | 0 | 0 |
| S100a4        | 3  | 0 | 0 | 0 |
| Them4         | 1  | 0 | 0 | 0 |
| Them5         | 1  | 0 | 0 | 0 |
| Rorc          | 4  | 0 | 0 | 0 |
| Lingo4        | 1  | 0 | 0 | 0 |
| Tdrkh         | 5  | 0 | 0 | 0 |
| XLOC_020993   | 1  | 0 | 0 | 0 |
| Mrpl9         | 1  | 0 | 0 | 0 |
| Celf3         | 11 | 0 | 0 | 0 |
| Pogz          | 9  | 0 | 0 | 0 |
| Selenbp1      | 2  | 0 | 0 | 0 |
| Rfx5          | 4  | 0 | 0 | 0 |
| 4930481B07Rik | 1  | 0 | 0 | 0 |
| Vps72         | 1  | 0 | 0 | 0 |
| Tmod4         | 3  | 0 | 0 | 0 |
| Sema6c        | 10 | 0 | 0 | 0 |
| Cdc42se1      | 3  | 0 | 0 | 0 |
| Fam63a        | 6  | 0 | 0 | 0 |
| Lass2         | 5  | 0 | 0 | 0 |
| Gm4349        | 1  | 0 | 0 | 0 |
| Arnt          | 7  | 0 | 0 | 0 |
| Ctsk          | 3  | 0 | 0 | 0 |
| Golph3l       | 1  | 0 | 0 | 0 |
| Ensa          | 1  | 0 | 0 | 0 |
| Mcl1          | 2  | 0 | 0 | 0 |
| Aph1a         | 6  | 0 | 0 | 0 |
| AK028005      | 1  | 0 | 0 | 0 |
| Otud7b        | 10 | 0 | 0 | 0 |

|               |    |   |   |   |
|---------------|----|---|---|---|
| Mtmr11        | 4  | 0 | 0 | 0 |
| Sf3b4         | 9  | 0 | 0 | 0 |
| Sv2a          | 4  | 0 | 0 | 0 |
| Hist2h2be     | 1  | 0 | 0 | 0 |
| Txnip         | 2  | 0 | 0 | 0 |
| Lix1l         | 1  | 0 | 0 | 0 |
| Rbm8a         | 5  | 0 | 0 | 0 |
| Itga10        | 6  | 0 | 0 | 0 |
| Pias3         | 3  | 0 | 0 | 0 |
| Rnf115        | 1  | 0 | 0 | 0 |
| Acp6          | 1  | 0 | 0 | 0 |
| Prkab2        | 3  | 0 | 0 | 0 |
| Sec22b        | 1  | 0 | 0 | 0 |
| Notch2        | 3  | 0 | 0 | 0 |
| Zfp697        | 6  | 0 | 0 | 0 |
| Wars2         | 2  | 0 | 0 | 0 |
| Gdap2         | 1  | 0 | 0 | 0 |
| Trim45        | 2  | 0 | 0 | 0 |
| Igsf3         | 5  | 0 | 0 | 0 |
| Tspan2        | 2  | 0 | 0 | 0 |
| Sike1         | 3  | 0 | 0 | 0 |
| Csde1         | 5  | 0 | 0 | 0 |
| Nras          | 3  | 0 | 0 | 0 |
| Dennd2c       | 1  | 0 | 0 | 0 |
| Bcas2         | 2  | 0 | 0 | 0 |
| Trim33        | 3  | 0 | 0 | 0 |
| Syt6          | 10 | 0 | 0 | 0 |
| Ap4b1         | 2  | 0 | 0 | 0 |
| Ptpn22        | 4  | 0 | 0 | 0 |
| Phtf1         | 10 | 0 | 0 | 0 |
| Slc16a1       | 3  | 0 | 0 | 0 |
| Ppm1j         | 9  | 0 | 0 | 0 |
| Rhoc          | 5  | 0 | 0 | 0 |
| St7l          | 3  | 0 | 0 | 0 |
| Kcnd3         | 4  | 0 | 0 | 0 |
| 6530418L21Rik | 2  | 0 | 0 | 0 |
| Wdr77         | 2  | 0 | 0 | 0 |
| Chia          | 4  | 0 | 0 | 0 |
| Dram2         | 1  | 0 | 0 | 0 |
| 4933421E11Rik | 4  | 0 | 0 | 0 |
| A1504432      | 1  | 0 | 0 | 0 |
| Kcna2         | 6  | 0 | 0 | 0 |
| Hbxip         | 1  | 0 | 0 | 0 |
| Slc16a4       | 4  | 0 | 0 | 0 |
| XLOC_021090   | 1  | 0 | 0 | 0 |
| Gstm5         | 2  | 0 | 0 | 0 |
| Amigo1        | 2  | 0 | 0 | 0 |

|               |    |   |   |   |
|---------------|----|---|---|---|
| Psma5         | 6  | 0 | 0 | 0 |
| Sort1         | 3  | 0 | 0 | 0 |
| Psrc1         | 6  | 0 | 0 | 0 |
| Taf13         | 4  | 0 | 0 | 0 |
| Wdr47         | 7  | 0 | 0 | 0 |
| Clcc1         | 2  | 0 | 0 | 0 |
| Slc25a24      | 2  | 0 | 0 | 0 |
| Vav3          | 5  | 0 | 0 | 0 |
| Col11a1       | 7  | 0 | 0 | 0 |
| Olfm3         | 2  | 0 | 0 | 0 |
| Dph5          | 1  | 0 | 0 | 0 |
| Extl2         | 5  | 0 | 0 | 0 |
| XLOC_021118   | 3  | 0 | 0 | 0 |
| 4833424O15Rik | 3  | 0 | 0 | 0 |
| XLOC_021122   | 9  | 0 | 0 | 0 |
| Alg14         | 3  | 0 | 0 | 0 |
| Cnn3          | 2  | 0 | 0 | 0 |
| F3            | 2  | 0 | 0 | 0 |
| Arhgap29      | 8  | 0 | 0 | 0 |
| Gclm          | 2  | 0 | 0 | 0 |
| Dnttip2       | 2  | 0 | 0 | 0 |
| Bcar3         | 3  | 0 | 0 | 0 |
| 1810037I17Rik | 1  | 0 | 0 | 0 |
| Sec24d        | 4  | 0 | 0 | 0 |
| Tram11        | 1  | 0 | 0 | 0 |
| Arsj          | 1  | 0 | 0 | 0 |
| Camk2d        | 2  | 0 | 0 | 0 |
| Elovl6        | 4  | 0 | 0 | 0 |
| Pla2g12a      | 1  | 0 | 0 | 0 |
| Casp6         | 2  | 0 | 0 | 0 |
| XLOC_021153   | 2  | 0 | 0 | 0 |
| Lef1          | 3  | 0 | 0 | 0 |
| Papss1        | 3  | 0 | 0 | 0 |
| Tbck          | 3  | 0 | 0 | 0 |
| Ints12        | 3  | 0 | 0 | 0 |
| Ppa2          | 7  | 0 | 0 | 0 |
| BC065149      | 2  | 0 | 0 | 0 |
| XLOC_021171   | 2  | 0 | 0 | 0 |
| XLOC_021172   | 1  | 0 | 0 | 0 |
| Ppp3ca        | 8  | 0 | 0 | 0 |
| Emcn          | 2  | 0 | 0 | 0 |
| Ddit4l        | 2  | 0 | 0 | 0 |
| Dnajb14       | 1  | 0 | 0 | 0 |
| Mapksp1       | 10 | 0 | 0 | 0 |
| Rg9mtd2       | 4  | 0 | 0 | 0 |
| Adh1          | 3  | 0 | 0 | 0 |
| Adh5          | 2  | 0 | 0 | 0 |



|               |       |    |   |   |   |
|---------------|-------|----|---|---|---|
| Eif4e         |       | 7  | 0 | 0 | 0 |
| XLOC_021183   |       | 3  | 0 | 0 | 0 |
| Tspan5        |       | 7  | 0 | 0 | 0 |
| Gbp6          |       | 2  | 0 | 0 | 0 |
| Gbp3          |       | 5  | 0 | 0 | 0 |
| Ccbl2         |       | 2  | 0 | 0 | 0 |
| Gtf2b         |       | 1  | 0 | 0 | 0 |
| XLOC_021191   |       | 5  | 0 | 0 | 0 |
|               | 41897 | 5  | 0 | 0 | 0 |
| Col24a1       |       | 11 | 0 | 0 | 0 |
| Znhit6        |       | 4  | 0 | 0 | 0 |
| FJ422280      |       | 1  | 0 | 0 | 0 |
| Ddah1         |       | 3  | 0 | 0 | 0 |
| Bcl10         |       | 3  | 0 | 0 | 0 |
| 2410004B18Rik |       | 4  | 0 | 0 | 0 |
| Syde2         |       | 2  | 0 | 0 | 0 |
| Ssx2ip        |       | 5  | 0 | 0 | 0 |
| Gng5          |       | 2  | 0 | 0 | 0 |
| Ttll7         |       | 4  | 0 | 0 | 0 |
| AK133793      |       | 3  | 0 | 0 | 0 |
| Fubp1         |       | 12 | 0 | 0 | 0 |
| Usp33         |       | 3  | 0 | 0 | 0 |
| XLOC_021219   |       | 2  | 0 | 0 | 0 |
| XLOC_021220   |       | 2  | 0 | 0 | 0 |
| 4922501L14Rik |       | 8  | 0 | 0 | 0 |
| Lrriq3        |       | 7  | 0 | 0 | 0 |
| Negr1         |       | 1  | 0 | 0 | 0 |
| Zranb2        |       | 2  | 0 | 0 | 0 |
| Ptger3        |       | 2  | 0 | 0 | 0 |
| Ankrd13c      |       | 3  | 0 | 0 | 0 |
| Wls           |       | 1  | 0 | 0 | 0 |
| Pxmp3         |       | 8  | 0 | 0 | 0 |
| Hey1          |       | 4  | 0 | 0 | 0 |
| Tpd52         |       | 13 | 0 | 0 | 0 |
| Zfp704        |       | 2  | 0 | 0 | 0 |
| Pag1          |       | 5  | 0 | 0 | 0 |
| Pmp2          |       | 1  | 0 | 0 | 0 |
| Impa1         |       | 2  | 0 | 0 | 0 |
| Zfand1        |       | 6  | 0 | 0 | 0 |
| Snx16         |       | 3  | 0 | 0 | 0 |
| AK140446      |       | 2  | 0 | 0 | 0 |
| LOC100038947  |       | 2  | 0 | 0 | 0 |
| Cyp7b1        |       | 2  | 0 | 0 | 0 |
| Armc1         |       | 5  | 0 | 0 | 0 |
| XLOC_021266   |       | 1  | 0 | 0 | 0 |
| Hps3          |       | 7  | 0 | 0 | 0 |
| Gyg           |       | 5  | 0 | 0 | 0 |

|               |    |   |   |   |
|---------------|----|---|---|---|
| Agtr1b        | 2  | 0 | 0 | 0 |
| Nlgn1         | 8  | 0 | 0 | 0 |
| Fndc3b        | 5  | 0 | 0 | 0 |
| AK007174      | 6  | 0 | 0 | 0 |
| AK046440      | 1  | 0 | 0 | 0 |
| Mecom         | 6  | 0 | 0 | 0 |
| Phc3          | 9  | 0 | 0 | 0 |
| Slc7a14       | 3  | 0 | 0 | 0 |
| Zmat3         | 6  | 0 | 0 | 0 |
| Gnb4          | 1  | 0 | 0 | 0 |
| Pex5l         | 8  | 0 | 0 | 0 |
| Ccdc39        | 5  | 0 | 0 | 0 |
| Dcun1d1       | 5  | 0 | 0 | 0 |
| Mccc1         | 7  | 0 | 0 | 0 |
| Anxa5         | 8  | 0 | 0 | 0 |
| AK043581      | 5  | 0 | 0 | 0 |
| Ccna2         | 1  | 0 | 0 | 0 |
| Bbs7          | 3  | 0 | 0 | 0 |
| Trpc3         | 8  | 0 | 0 | 0 |
| Cetn4         | 2  | 0 | 0 | 0 |
| Ankrd50       | 4  | 0 | 0 | 0 |
| Mfsd8         | 5  | 0 | 0 | 0 |
| Pgrmc2        | 2  | 0 | 0 | 0 |
| Sc1t1         | 4  | 0 | 0 | 0 |
| AK012035      | 10 | 0 | 0 | 0 |
| Pcdh18        | 4  | 0 | 0 | 0 |
| Elf2          | 9  | 0 | 0 | 0 |
| 4930583H14Rik | 1  | 0 | 0 | 0 |
| Ndufc1        | 3  | 0 | 0 | 0 |
| Setd7         | 2  | 0 | 0 | 0 |
| Maml3         | 4  | 0 | 0 | 0 |
| Cog6          | 1  | 0 | 0 | 0 |
| Nhlrc3        | 4  | 0 | 0 | 0 |
| Ufm1          | 1  | 0 | 0 | 0 |
| Rfxap         | 1  | 0 | 0 | 0 |
| 6030405A18Rik | 1  | 0 | 0 | 0 |
| Nbea          | 5  | 0 | 0 | 0 |
| Tm4sf1        | 3  | 0 | 0 | 0 |
| Wwtr1         | 1  | 0 | 0 | 0 |
| Commd2        | 2  | 0 | 0 | 0 |
| Pfn2          | 4  | 0 | 0 | 0 |
| XLOC_021349   | 1  | 0 | 0 | 0 |
| XLOC_021350   | 3  | 0 | 0 | 0 |
| AK005707      | 3  | 0 | 0 | 0 |
| Serp1         | 1  | 0 | 0 | 0 |
| Fam194a       | 1  | 0 | 0 | 0 |
| Siah2         | 1  | 0 | 0 | 0 |

|               |   |   |   |   |
|---------------|---|---|---|---|
| AK030561      | 4 | 0 | 0 | 0 |
| Clrn1         | 3 | 0 | 0 | 0 |
| P2ry14        | 4 | 0 | 0 | 0 |
| P2ry12        | 6 | 0 | 0 | 0 |
| Dhx36         | 3 | 0 | 0 | 0 |
| Gpr149        | 5 | 0 | 0 | 0 |
| Plch1         | 4 | 0 | 0 | 0 |
| E130311K13Rik | 1 | 0 | 0 | 0 |
| Slc33a1       | 2 | 0 | 0 | 0 |
| Ssr3          | 4 | 0 | 0 | 0 |
| Shox2         | 4 | 0 | 0 | 0 |
| Lxn           | 3 | 0 | 0 | 0 |
| Rarres1       | 1 | 0 | 0 | 0 |
| XLOC_021379   | 1 | 0 | 0 | 0 |
| Gm5848        | 1 | 0 | 0 | 0 |
| Ift80         | 5 | 0 | 0 | 0 |
| Kpna4         | 2 | 0 | 0 | 0 |
| B3galnt1      | 2 | 0 | 0 | 0 |
| 1110032A04Rik | 5 | 0 | 0 | 0 |
| Slitrk3       | 5 | 0 | 0 | 0 |
| Bche          | 3 | 0 | 0 | 0 |
| Pdcd10        | 9 | 0 | 0 | 0 |
| Rapgef2       | 9 | 0 | 0 | 0 |
| Fnip2         | 6 | 0 | 0 | 0 |
| Etfdh         | 2 | 0 | 0 | 0 |
| Rxfp1         | 4 | 0 | 0 | 0 |
| Tmem144       | 4 | 0 | 0 | 0 |
| Glrb          | 6 | 0 | 0 | 0 |
| Gucy1b3       | 2 | 0 | 0 | 0 |
| Gucy1a3       | 3 | 0 | 0 | 0 |
| Npy2r         | 4 | 0 | 0 | 0 |
| Rbm46         | 2 | 0 | 0 | 0 |
| D930015E06Rik | 5 | 0 | 0 | 0 |
| Mnd1          | 4 | 0 | 0 | 0 |
| Trim2         | 8 | 0 | 0 | 0 |
| Fhdc1         | 6 | 0 | 0 | 0 |
| Arfp1         | 8 | 0 | 0 | 0 |
| Fam160a1      | 2 | 0 | 0 | 0 |
| Dclk2         | 5 | 0 | 0 | 0 |
| Cd1d1         | 2 | 0 | 0 | 0 |
| Kirrel        | 6 | 0 | 0 | 0 |
| 4933430H15Rik | 2 | 0 | 0 | 0 |
| Pear1         | 9 | 0 | 0 | 0 |
| Ntrk1         | 4 | 0 | 0 | 0 |
| BC023814      | 4 | 0 | 0 | 0 |
| Bcan          | 8 | 0 | 0 | 0 |
| Apoa1bp       | 2 | 0 | 0 | 0 |

|               |    |   |   |   |
|---------------|----|---|---|---|
| Tmem79        | 3  | 0 | 0 | 0 |
| Pmf1          | 2  | 0 | 0 | 0 |
| Slc25a44      | 3  | 0 | 0 | 0 |
| Sema4a        | 8  | 0 | 0 | 0 |
| Lmna          | 6  | 0 | 0 | 0 |
| Robld3        | 3  | 0 | 0 | 0 |
| Gm10704       | 1  | 0 | 0 | 0 |
| Syt11         | 10 | 0 | 0 | 0 |
| Dap3          | 5  | 0 | 0 | 0 |
| Rusc1         | 9  | 0 | 0 | 0 |
| Hcn3          | 4  | 0 | 0 | 0 |
| Mtx1          | 3  | 0 | 0 | 0 |
| Trim46        | 5  | 0 | 0 | 0 |
| Slc50a1       | 2  | 0 | 0 | 0 |
| Efna1         | 1  | 0 | 0 | 0 |
| Efna3         | 2  | 0 | 0 | 0 |
| Efna4         | 1  | 0 | 0 | 0 |
| Adam15        | 7  | 0 | 0 | 0 |
| Zbtb7b        | 2  | 0 | 0 | 0 |
| Flad1         | 3  | 0 | 0 | 0 |
| Cks1b         | 1  | 0 | 0 | 0 |
| Chrn2         | 4  | 0 | 0 | 0 |
| Atp8b2        | 9  | 0 | 0 | 0 |
| Ubap2l        | 12 | 0 | 0 | 0 |
| Ints3         | 6  | 0 | 0 | 0 |
| Npr1          | 7  | 0 | 0 | 0 |
| Snapin        | 1  | 0 | 0 | 0 |
| 9130204L05Rik | 4  | 0 | 0 | 0 |
| XLOC_021484   | 1  | 0 | 0 | 0 |
| Lce6a         | 6  | 0 | 0 | 0 |
| Riiad1        | 1  | 0 | 0 | 0 |
| Snx27         | 4  | 0 | 0 | 0 |
| Tuft1         | 5  | 0 | 0 | 0 |
| Cgn           | 5  | 0 | 0 | 0 |
| Psm4          | 2  | 0 | 0 | 0 |
| Zfp687        | 7  | 0 | 0 | 0 |
| Psm4          | 9  | 0 | 0 | 0 |
| Pip5k1a       | 8  | 0 | 0 | 0 |
| Tnfaip8l2     | 2  | 0 | 0 | 0 |
| XLOC_021499   | 1  | 0 | 0 | 0 |
| Mllt11        | 4  | 0 | 0 | 0 |
| Bnpl          | 4  | 0 | 0 | 0 |
| Prune         | 3  | 0 | 0 | 0 |
| Adamtsl4      | 5  | 0 | 0 | 0 |
| Prpf3         | 3  | 0 | 0 | 0 |
| Mrps21        | 2  | 0 | 0 | 0 |
| Gm129         | 5  | 0 | 0 | 0 |

|               |    |   |   |   |
|---------------|----|---|---|---|
| BC028528      | 5  | 0 | 0 | 0 |
| Car14         | 2  | 0 | 0 | 0 |
| Plekho1       | 4  | 0 | 0 | 0 |
| Vps45         | 5  | 0 | 0 | 0 |
| Bola1         | 3  | 0 | 0 | 0 |
| Polr3gl       | 3  | 0 | 0 | 0 |
| Polr3c        | 4  | 0 | 0 | 0 |
| Gpr89         | 1  | 0 | 0 | 0 |
| Bcl9          | 11 | 0 | 0 | 0 |
| Chd1l         | 1  | 0 | 0 | 0 |
| Pde4dip       | 13 | 0 | 0 | 0 |
| Phgdh         | 9  | 0 | 0 | 0 |
| Wdr3          | 3  | 0 | 0 | 0 |
| Fam46c        | 1  | 0 | 0 | 0 |
| Man1a2        | 3  | 0 | 0 | 0 |
| Ttf2          | 2  | 0 | 0 | 0 |
| Ptgfrn        | 4  | 0 | 0 | 0 |
| Atp1a1        | 6  | 0 | 0 | 0 |
| XLOC_021543   | 1  | 0 | 0 | 0 |
| BC037703      | 1  | 0 | 0 | 0 |
| Slc22a15      | 5  | 0 | 0 | 0 |
| Vangl1        | 5  | 0 | 0 | 0 |
| XLOC_021547   | 2  | 0 | 0 | 0 |
| Olfml3        | 1  | 0 | 0 | 0 |
| Hipk1         | 5  | 0 | 0 | 0 |
| Dclre1b       | 2  | 0 | 0 | 0 |
| Magi3         | 5  | 0 | 0 | 0 |
| Mov10         | 10 | 0 | 0 | 0 |
| Capza1        | 5  | 0 | 0 | 0 |
| Wnt2b         | 1  | 0 | 0 | 0 |
| Ctnbp2nl      | 2  | 0 | 0 | 0 |
| Ddx20         | 2  | 0 | 0 | 0 |
| Rap1a         | 5  | 0 | 0 | 0 |
| 1700027A23Rik | 1  | 0 | 0 | 0 |
| Cept1         | 4  | 0 | 0 | 0 |
| Rbm15         | 1  | 0 | 0 | 0 |
| Kcnc4         | 3  | 0 | 0 | 0 |
| Slc6a17       | 3  | 0 | 0 | 0 |
| Ahcyl1        | 2  | 0 | 0 | 0 |
| Csf1          | 8  | 0 | 0 | 0 |
| Gstm4         | 3  | 0 | 0 | 0 |
| Ampd2         | 8  | 0 | 0 | 0 |
| Gnai3         | 6  | 0 | 0 | 0 |
| Cyb561d1      | 4  | 0 | 0 | 0 |
| Atxn7l2       | 6  | 0 | 0 | 0 |
| AK144267      | 1  | 0 | 0 | 0 |
| Sars          | 3  | 0 | 0 | 0 |

|               |    |   |   |   |
|---------------|----|---|---|---|
| 5330417C22Rik | 4  | 0 | 0 | 0 |
| Tmem167b      | 2  | 0 | 0 | 0 |
| Gpsm2         | 2  | 0 | 0 | 0 |
| Prpf38b       | 7  | 0 | 0 | 0 |
| Fam102b       | 3  | 0 | 0 | 0 |
| XLOC_021596   | 1  | 0 | 0 | 0 |
| Ntng1         | 7  | 0 | 0 | 0 |
| Prmt6         | 2  | 0 | 0 | 0 |
| Gm5548        | 1  | 0 | 0 | 0 |
| Rnpc3         | 8  | 0 | 0 | 0 |
| S1pr1         | 2  | 0 | 0 | 0 |
| A930005H10Rik | 2  | 0 | 0 | 0 |
| Slc30a7       | 2  | 0 | 0 | 0 |
| Vcam1         | 1  | 0 | 0 | 0 |
| Cdc14a        | 6  | 0 | 0 | 0 |
| Rtcd1         | 2  | 0 | 0 | 0 |
| Gm4596        | 1  | 0 | 0 | 0 |
| Ccdc76        | 6  | 0 | 0 | 0 |
| Hiat1         | 3  | 0 | 0 | 0 |
| Slc35a3       | 7  | 0 | 0 | 0 |
| Agl           | 7  | 0 | 0 | 0 |
| Palmd         | 6  | 0 | 0 | 0 |
| D3Bwg0562e    | 3  | 0 | 0 | 0 |
| Snx7          | 1  | 0 | 0 | 0 |
| XLOC_021619   | 3  | 0 | 0 | 0 |
| Ptbp2         | 6  | 0 | 0 | 0 |
| XLOC_021623   | 4  | 0 | 0 | 0 |
| Tmem56        | 4  | 0 | 0 | 0 |
| Abcd3         | 5  | 0 | 0 | 0 |
| Fnbp1l        | 6  | 0 | 0 | 0 |
| AK016661      | 1  | 0 | 0 | 0 |
| Usp53         | 8  | 0 | 0 | 0 |
| Mettl14       | 3  | 0 | 0 | 0 |
| BC096391      | 1  | 0 | 0 | 0 |
| Ndst3         | 6  | 0 | 0 | 0 |
| XLOC_021641   | 1  | 0 | 0 | 0 |
| Ugt8a         | 3  | 0 | 0 | 0 |
| Ank2          | 14 | 0 | 0 | 0 |
| Ap1ar         | 8  | 0 | 0 | 0 |
| Gm9387        | 1  | 0 | 0 | 0 |
| Enpep         | 3  | 0 | 0 | 0 |
| Egf           | 5  | 0 | 0 | 0 |
| Gar1          | 3  | 0 | 0 | 0 |
| Ccdc109b      | 2  | 0 | 0 | 0 |
| Sec24b        | 7  | 0 | 0 | 0 |
| Ostc          | 1  | 0 | 0 | 0 |
| Rpl34         | 5  | 0 | 0 | 0 |

|               |    |   |   |   |
|---------------|----|---|---|---|
| Hadh          | 1  | 0 | 0 | 0 |
| Cyp2u1        | 6  | 0 | 0 | 0 |
| Sgms2         | 3  | 0 | 0 | 0 |
| Gstcd         | 3  | 0 | 0 | 0 |
| Tet2          | 4  | 0 | 0 | 0 |
| Cisd2         | 2  | 0 | 0 | 0 |
| Dapp1         | 4  | 0 | 0 | 0 |
| Gm5105        | 1  | 0 | 0 | 0 |
| Metap1        | 3  | 0 | 0 | 0 |
| Rap1gds1      | 4  | 0 | 0 | 0 |
| Pdlim5        | 8  | 0 | 0 | 0 |
| Pkn2          | 4  | 0 | 0 | 0 |
| XLOC_021687   | 1  | 0 | 0 | 0 |
| Lmo4          | 2  | 0 | 0 | 0 |
| Sh3glb1       | 6  | 0 | 0 | 0 |
| Cyr61         | 4  | 0 | 0 | 0 |
| Rpf1          | 2  | 0 | 0 | 0 |
| Prkacb        | 4  | 0 | 0 | 0 |
| Gm10288       | 1  | 0 | 0 | 0 |
| Rpsa-ps10     | 1  | 0 | 0 | 0 |
| Ifi44         | 5  | 0 | 0 | 0 |
| Gipc2         | 2  | 0 | 0 | 0 |
| Semcap2       | 1  | 0 | 0 | 0 |
| Dnajb4        | 6  | 0 | 0 | 0 |
| Nexn          | 4  | 0 | 0 | 0 |
| Fam73a        | 4  | 0 | 0 | 0 |
| Ak5           | 5  | 0 | 0 | 0 |
| St6galnac5    | 3  | 0 | 0 | 0 |
| Rabggtb       | 3  | 0 | 0 | 0 |
| Acadm         | 3  | 0 | 0 | 0 |
| Fpgt          | 4  | 0 | 0 | 0 |
| AK016265      | 1  | 0 | 0 | 0 |
| BC048612      | 1  | 0 | 0 | 0 |
| AK076987      | 1  | 0 | 0 | 0 |
| Srsf11        | 6  | 0 | 0 | 0 |
| XLOC_020802   | 2  | 0 | 0 | 0 |
| XLOC_020809   | 2  | 0 | 0 | 0 |
| Fat4          | 2  | 0 | 0 | 0 |
| AK009813      | 1  | 0 | 0 | 0 |
| 3110057012Rik | 5  | 0 | 0 | 0 |
| XLOC_020844   | 3  | 0 | 0 | 0 |
| Gm8234        | 1  | 0 | 0 | 0 |
| Mbnl1         | 12 | 0 | 0 | 0 |
| P2ry1         | 3  | 0 | 0 | 0 |
| Lba           | 1  | 0 | 0 | 0 |
| Muc1          | 1  | 0 | 0 | 0 |
| Krtcap2       | 2  | 0 | 0 | 0 |

|               |    |   |   |   |
|---------------|----|---|---|---|
| S100a2        | 1  | 0 | 0 | 0 |
| S100a5        | 2  | 0 | 0 | 0 |
| Selenbp2      | 1  | 0 | 0 | 0 |
| Pi4kb         | 3  | 0 | 0 | 0 |
| XLOC_021040   | 1  | 0 | 0 | 0 |
| Gm5544        | 1  | 0 | 0 | 0 |
| Rsbn1         | 2  | 0 | 0 | 0 |
| Sass6         | 1  | 0 | 0 | 0 |
| AK076759      | 2  | 0 | 0 | 0 |
| XLOC_021160   | 3  | 0 | 0 | 0 |
| Bdh2          | 2  | 0 | 0 | 0 |
| Ube2d2b       | 6  | 0 | 0 | 0 |
| XLOC_021173   | 5  | 0 | 0 | 0 |
| XLOC_021177   | 1  | 0 | 0 | 0 |
| Gbp1          | 2  | 0 | 0 | 0 |
| Eltid1        | 3  | 0 | 0 | 0 |
| Zzz3          | 4  | 0 | 0 | 0 |
| XLOC_021218   | 4  | 0 | 0 | 0 |
| Gm3076        | 1  | 0 | 0 | 0 |
| Cryz          | 3  | 0 | 0 | 0 |
| Lrrc40        | 2  | 0 | 0 | 0 |
| AK012506      | 1  | 0 | 0 | 0 |
| XLOC_021248   | 1  | 0 | 0 | 0 |
| Fabp4         | 1  | 0 | 0 | 0 |
| 1810022K09Rik | 3  | 0 | 0 | 0 |
| Arpm1         | 1  | 0 | 0 | 0 |
| Mrpl47        | 3  | 0 | 0 | 0 |
| Nudt6         | 2  | 0 | 0 | 0 |
| Exosc8        | 1  | 0 | 0 | 0 |
| XLOC_021380   | 3  | 0 | 0 | 0 |
| snoU90        | 1  | 0 | 0 | 0 |
| Rpl32-ps      | 1  | 0 | 0 | 0 |
| Hapln2        | 2  | 0 | 0 | 0 |
| AK008852      | 1  | 0 | 0 | 0 |
| 1700021C14Rik | 2  | 0 | 0 | 0 |
| S100a1        | 1  | 0 | 0 | 0 |
| Oaz3          | 1  | 0 | 0 | 0 |
| Anxa9         | 4  | 0 | 0 | 0 |
| Setdb1        | 5  | 0 | 0 | 0 |
| Tars2         | 10 | 0 | 0 | 0 |
| 2410057H14Rik | 2  | 0 | 0 | 0 |
| Fam19a3       | 3  | 0 | 0 | 0 |
| AK018929      | 3  | 0 | 0 | 0 |
| Atp5f1        | 5  | 0 | 0 | 0 |
| Gstm1         | 2  | 0 | 0 | 0 |
| Gpr61         | 2  | 0 | 0 | 0 |
| Alpk1         | 10 | 0 | 0 | 0 |



|               |   |   |   |   |
|---------------|---|---|---|---|
| 5730508B09Rik | 2 | 0 | 0 | 0 |
| Bank1         | 5 | 0 | 0 | 0 |
| Tnni3k        | 1 | 0 | 0 | 0 |
| Lrrc7         | 4 | 0 | 0 | 0 |
| XLOC_020763   | 2 | 0 | 0 | 0 |
| XLOC_020764   | 1 | 0 | 0 | 0 |
| XLOC_020799   | 2 | 0 | 0 | 0 |
| XLOC_020800   | 1 | 0 | 0 | 0 |
| Sfrp2         | 1 | 0 | 0 | 0 |
| XLOC_020907   | 1 | 0 | 0 | 0 |
| Mrpl24        | 2 | 0 | 0 | 0 |
| Gon4l         | 1 | 0 | 0 | 0 |
| Pygo2         | 1 | 0 | 0 | 0 |
| Lysmd1        | 2 | 0 | 0 | 0 |
| AK020406      | 1 | 0 | 0 | 0 |
| Ankrd34a      | 1 | 0 | 0 | 0 |
| XLOC_021036   | 1 | 0 | 0 | 0 |
| Pdzk1         | 1 | 0 | 0 | 0 |
| Tbx15         | 1 | 0 | 0 | 0 |
| XLOC_021053   | 1 | 0 | 0 | 0 |
| XLOC_021078   | 3 | 0 | 0 | 0 |
| XLOC_021114   | 1 | 0 | 0 | 0 |
| XLOC_021145   | 1 | 0 | 0 | 0 |
| AK050464      | 4 | 0 | 0 | 0 |
| Cenpe         | 3 | 0 | 0 | 0 |
| Gbp5          | 3 | 0 | 0 | 0 |
| XLOC_021232   | 1 | 0 | 0 | 0 |
| XLOC_021260   | 1 | 0 | 0 | 0 |
| Naaladl2      | 1 | 0 | 0 | 0 |
| Ect2          | 2 | 0 | 0 | 0 |
| Gm6505        | 1 | 0 | 0 | 0 |
| Lrrc34        | 2 | 0 | 0 | 0 |
| Dnajc19       | 6 | 0 | 0 | 0 |
| XLOC_021321   | 1 | 0 | 0 | 0 |
| XLOC_021346   | 1 | 0 | 0 | 0 |
| XLOC_021391   | 2 | 0 | 0 | 0 |
| AK137033      | 1 | 0 | 0 | 0 |
| AK158189      | 3 | 0 | 0 | 0 |
| AK007191      | 1 | 0 | 0 | 0 |
| Il6ra         | 2 | 0 | 0 | 0 |
| Gabpb2        | 3 | 0 | 0 | 0 |
| Gm16520       | 1 | 0 | 0 | 0 |
| Chi3l3        | 1 | 0 | 0 | 0 |
| AK041310      | 1 | 0 | 0 | 0 |
| Gm15688       | 1 | 0 | 0 | 0 |
| Ctca5         | 2 | 0 | 0 | 0 |
| XLOC_021707   | 1 | 0 | 0 | 0 |

|               |   |   |   |   |
|---------------|---|---|---|---|
| Tyw3          | 2 | 0 | 0 | 0 |
| Chmp4c        | 1 | 0 | 0 | 0 |
| XLOC_020770   | 1 | 0 | 0 | 0 |
| XLOC_020811   | 2 | 0 | 0 | 0 |
| Spry1         | 1 | 0 | 0 | 0 |
| Plk4          | 5 | 0 | 0 | 0 |
| XLOC_020874   | 7 | 0 | 0 | 0 |
| Otol1         | 3 | 0 | 0 | 0 |
| Gba           | 3 | 0 | 0 | 0 |
| Sprr2i        | 1 | 0 | 0 | 0 |
| Hmgcs2        | 1 | 0 | 0 | 0 |
| XLOC_021071   | 2 | 0 | 0 | 0 |
| XLOC_021094   | 1 | 0 | 0 | 0 |
| XLOC_021121   | 2 | 0 | 0 | 0 |
| Mrps28        | 1 | 0 | 0 | 0 |
| XLOC_021273   | 3 | 0 | 0 | 0 |
| XLOC_021279   | 1 | 0 | 0 | 0 |
| RP24-396D16.1 | 2 | 0 | 0 | 0 |
| AK144834      | 1 | 0 | 0 | 0 |
| AK161073      | 2 | 0 | 0 | 0 |
| Creb3l4       | 2 | 0 | 0 | 0 |
| Slc27a3       | 1 | 0 | 0 | 0 |
| Lce1f         | 2 | 0 | 0 | 0 |
| Lce1g         | 1 | 0 | 0 | 0 |
| Rprd2         | 1 | 0 | 0 | 0 |
| XLOC_021542   | 3 | 0 | 0 | 0 |
| Slc44a3       | 1 | 0 | 0 | 0 |
| Synpo2        | 1 | 0 | 0 | 0 |
| XLOC_021637   | 1 | 0 | 0 | 0 |
| XLOC_021640   | 2 | 0 | 0 | 0 |
| Mttp          | 2 | 0 | 0 | 0 |
| Wdr63         | 3 | 0 | 0 | 0 |
| Cth           | 1 | 0 | 0 | 0 |
| Gm8935        | 1 | 0 | 0 | 0 |
| Slc2a2        | 1 | 0 | 0 | 0 |
| XLOC_020892   | 1 | 0 | 0 | 0 |
| XLOC_020978   | 1 | 0 | 0 | 0 |
| XLOC_021113   | 1 | 0 | 0 | 0 |
| Gm9364        | 1 | 0 | 0 | 0 |
| AK029402      | 1 | 0 | 0 | 0 |
| XLOC_021144   | 1 | 0 | 0 | 0 |
| H2afz         | 1 | 0 | 0 | 0 |
| XLOC_021239   | 1 | 0 | 0 | 0 |
| XLOC_021244   | 2 | 0 | 0 | 0 |
| XLOC_021274   | 1 | 0 | 0 | 0 |
| EG381438      | 1 | 0 | 0 | 0 |
| XLOC_021476   | 1 | 0 | 0 | 0 |

|               |   |   |   |   |
|---------------|---|---|---|---|
| Lor           | 1 | 0 | 0 | 0 |
| XLOC_021517   | 1 | 0 | 0 | 0 |
| XLOC_021601   | 1 | 0 | 0 | 0 |
| Npnt          | 1 | 0 | 0 | 0 |
| Clca1         | 1 | 0 | 0 | 0 |
| XLOC_020750   | 1 | 0 | 0 | 0 |
| AK020793      | 1 | 0 | 0 | 0 |
| A330050B17Rik | 1 | 0 | 0 | 0 |
| XLOC_020851   | 1 | 0 | 0 | 0 |
| XLOC_020873   | 1 | 0 | 0 | 0 |
| Ppid          | 1 | 0 | 0 | 0 |
| XLOC_020931   | 1 | 0 | 0 | 0 |
| S100a7a       | 2 | 0 | 0 | 0 |
| Sprr2g        | 1 | 0 | 0 | 0 |
| Dennd2d       | 1 | 0 | 0 | 0 |
| XLOC_021146   | 1 | 0 | 0 | 0 |
| Cpa3          | 1 | 0 | 0 | 0 |
| XLOC_021272   | 1 | 0 | 0 | 0 |
| AK080657      | 1 | 0 | 0 | 0 |
| XLOC_021309   | 1 | 0 | 0 | 0 |
| Amy1          | 1 | 0 | 0 | 0 |
| XLOC_021663   | 1 | 0 | 0 | 0 |
| AK034519      | 1 | 0 | 0 | 0 |
| AK077587      | 1 | 0 | 0 | 0 |
| A1838599      | 5 | 0 | 0 | 0 |
| Tgs1          | 4 | 0 | 0 | 0 |
| Lyn           | 3 | 0 | 0 | 0 |
| Chchd7        | 7 | 0 | 0 | 0 |
| Fam110b       | 7 | 0 | 0 | 0 |
| Ubxn2b        | 1 | 0 | 0 | 0 |
| Sdcbp         | 6 | 0 | 0 | 0 |
| Rab2a         | 3 | 0 | 0 | 0 |
| Clvs1         | 2 | 0 | 0 | 0 |
| 2610301B20Rik | 3 | 0 | 0 | 0 |
| Gm11828       | 1 | 0 | 0 | 0 |
| Trp53inp1     | 4 | 0 | 0 | 0 |
| 1110037F02Rik | 2 | 0 | 0 | 0 |
| Gem           | 2 | 0 | 0 | 0 |
| AK005538      | 1 | 0 | 0 | 0 |
| AK007255      | 1 | 0 | 0 | 0 |
| XLOC_022711   | 9 | 0 | 0 | 0 |
| XLOC_022713   | 6 | 0 | 0 | 0 |
| Gm11818       | 2 | 0 | 0 | 0 |
| Runx1t1       | 3 | 0 | 0 | 0 |
| Tmem64        | 1 | 0 | 0 | 0 |
| Calb1         | 2 | 0 | 0 | 0 |
| Nbn           | 1 | 0 | 0 | 0 |

|               |    |   |   |   |
|---------------|----|---|---|---|
| AK171183      | 1  | 0 | 0 | 0 |
| AK080160      | 5  | 0 | 0 | 0 |
| mt3-mmp       | 1  | 0 | 0 | 0 |
| Fam82b        | 2  | 0 | 0 | 0 |
| Ttpa          | 2  | 0 | 0 | 0 |
| Ggh           | 2  | 0 | 0 | 0 |
| Ccnc          | 7  | 0 | 0 | 0 |
| Usp45         | 5  | 0 | 0 | 0 |
| Sfrs18        | 7  | 0 | 0 | 0 |
| 6230409E13Rik | 7  | 0 | 0 | 0 |
| XLOC_022734   | 2  | 0 | 0 | 0 |
| Fbxl4         | 6  | 0 | 0 | 0 |
| F730047E07Rik | 1  | 0 | 0 | 0 |
| Mms22l        | 6  | 0 | 0 | 0 |
| Ndufaf4       | 1  | 0 | 0 | 0 |
| Epha7         | 6  | 0 | 0 | 0 |
| Map3k7        | 5  | 0 | 0 | 0 |
| XLOC_022743   | 2  | 0 | 0 | 0 |
| Casp8ap2      | 2  | 0 | 0 | 0 |
| Lym2          | 1  | 0 | 0 | 0 |
| Rragd         | 5  | 0 | 0 | 0 |
| Ube2j1        | 2  | 0 | 0 | 0 |
| Srsf13b       | 4  | 0 | 0 | 0 |
| Rngtt         | 2  | 0 | 0 | 0 |
| Akirin2       | 2  | 0 | 0 | 0 |
| Rars2         | 1  | 0 | 0 | 0 |
| Aco1          | 3  | 0 | 0 | 0 |
| Chmp5         | 3  | 0 | 0 | 0 |
| Nfx1          | 5  | 0 | 0 | 0 |
| Ube2r2        | 4  | 0 | 0 | 0 |
| Ubap1         | 2  | 0 | 0 | 0 |
| Nudt2         | 5  | 0 | 0 | 0 |
| Ccl21b        | 2  | 0 | 0 | 0 |
| Gm2506        | 4  | 0 | 0 | 0 |
| N28178        | 17 | 0 | 0 | 0 |
| Dnajb5        | 2  | 0 | 0 | 0 |
| Atp8b5        | 8  | 0 | 0 | 0 |
| Rusc2         | 10 | 0 | 0 | 0 |
| Tesk1         | 2  | 0 | 0 | 0 |
| Ccdc107       | 4  | 0 | 0 | 0 |
| XLOC_022796   | 2  | 0 | 0 | 0 |
| Npr2          | 7  | 0 | 0 | 0 |
| 5430416O09Rik | 2  | 0 | 0 | 0 |
| Reck          | 8  | 0 | 0 | 0 |
| Glipr2        | 1  | 0 | 0 | 0 |
| Clta          | 4  | 0 | 0 | 0 |
| Zcchc7        | 4  | 0 | 0 | 0 |

|               |   |   |   |   |
|---------------|---|---|---|---|
| Grhpr         | 1 | 0 | 0 | 0 |
| Polr1e        | 3 | 0 | 0 | 0 |
| Frmpd1        | 4 | 0 | 0 | 0 |
| Rg9mtd3       | 3 | 0 | 0 | 0 |
| Wdr32         | 2 | 0 | 0 | 0 |
| Dcaf10        | 1 | 0 | 0 | 0 |
| AK044089      | 2 | 0 | 0 | 0 |
| Aldh1b1       | 1 | 0 | 0 | 0 |
| Ncbp1         | 2 | 0 | 0 | 0 |
| Anp32b        | 6 | 0 | 0 | 0 |
| Nans          | 4 | 0 | 0 | 0 |
| Galnt12       | 5 | 0 | 0 | 0 |
| Col15a1       | 5 | 0 | 0 | 0 |
| Sec61b        | 1 | 0 | 0 | 0 |
| XLOC_022831   | 1 | 0 | 0 | 0 |
| XLOC_022832   | 2 | 0 | 0 | 0 |
| Nr4a3         | 1 | 0 | 0 | 0 |
| Stx17         | 3 | 0 | 0 | 0 |
| 5730528L13Rik | 4 | 0 | 0 | 0 |
| Tmeff1        | 6 | 0 | 0 | 0 |
| E130309F12Rik | 4 | 0 | 0 | 0 |
| Zfp189        | 1 | 0 | 0 | 0 |
| Rnf20         | 6 | 0 | 0 | 0 |
| Nipsnap3a     | 1 | 0 | 0 | 0 |
| Nipsnap3b     | 1 | 0 | 0 | 0 |
| Slc44a1       | 6 | 0 | 0 | 0 |
| Fsd1l         | 3 | 0 | 0 | 0 |
| Fktn          | 7 | 0 | 0 | 0 |
| Tmem38b       | 1 | 0 | 0 | 0 |
| Zfp462        | 7 | 0 | 0 | 0 |
| XLOC_022856   | 2 | 0 | 0 | 0 |
| Rad23b        | 2 | 0 | 0 | 0 |
| BC026590      | 1 | 0 | 0 | 0 |
| XLOC_022860   | 1 | 0 | 0 | 0 |
| Gm12530       | 2 | 0 | 0 | 0 |
| Musk          | 2 | 0 | 0 | 0 |
| Dnajc25       | 2 | 0 | 0 | 0 |
| Gng10         | 2 | 0 | 0 | 0 |
| Ugcg          | 2 | 0 | 0 | 0 |
| Hsd12         | 2 | 0 | 0 | 0 |
| E130308A19Rik | 4 | 0 | 0 | 0 |
| XLOC_022870   | 3 | 0 | 0 | 0 |
| Snx30         | 1 | 0 | 0 | 0 |
| Gm12543       | 1 | 0 | 0 | 0 |
| Slc31a2       | 1 | 0 | 0 | 0 |
| Slc31a1       | 1 | 0 | 0 | 0 |
| Prpf4         | 2 | 0 | 0 | 0 |

|               |    |   |   |   |
|---------------|----|---|---|---|
| Bspry         | 3  | 0 | 0 | 0 |
| Rgs3          | 7  | 0 | 0 | 0 |
| Atp6v1g1      | 2  | 0 | 0 | 0 |
| 6330416G13Rik | 6  | 0 | 0 | 0 |
| Pappa         | 6  | 0 | 0 | 0 |
| Trim32        | 2  | 0 | 0 | 0 |
| Tlr4          | 4  | 0 | 0 | 0 |
| Gm11221       | 1  | 0 | 0 | 0 |
| Gm11222       | 1  | 0 | 0 | 0 |
| Frmd3         | 4  | 0 | 0 | 0 |
| Tyrp1         | 5  | 0 | 0 | 0 |
| D4Bwg0951e    | 3  | 0 | 0 | 0 |
| Gm11266       | 2  | 0 | 0 | 0 |
| 4930473A06Rik | 8  | 0 | 0 | 0 |
| XLOC_022910   | 5  | 0 | 0 | 0 |
| XLOC_022911   | 2  | 0 | 0 | 0 |
| Gm12418       | 1  | 0 | 0 | 0 |
| Sh3gl2        | 4  | 0 | 0 | 0 |
| Dennd4c       | 3  | 0 | 0 | 0 |
| Mtap          | 1  | 0 | 0 | 0 |
| XLOC_022924   | 2  | 0 | 0 | 0 |
| Ift74         | 1  | 0 | 0 | 0 |
| Tek           | 3  | 0 | 0 | 0 |
| XLOC_022928   | 1  | 0 | 0 | 0 |
| Hook1         | 7  | 0 | 0 | 0 |
| Nfia          | 5  | 0 | 0 | 0 |
| Inadl         | 11 | 0 | 0 | 0 |
| Usp1          | 3  | 0 | 0 | 0 |
| Atg4c         | 4  | 0 | 0 | 0 |
| Alg6          | 4  | 0 | 0 | 0 |
| Pgm2          | 2  | 0 | 0 | 0 |
| Cachd1        | 2  | 0 | 0 | 0 |
| AK002929      | 5  | 0 | 0 | 0 |
| Dnajc6        | 7  | 0 | 0 | 0 |
| Leprot        | 2  | 0 | 0 | 0 |
| Lepr          | 3  | 0 | 0 | 0 |
| XLOC_022952   | 1  | 0 | 0 | 0 |
| Pde4b         | 5  | 0 | 0 | 0 |
| Sgip1         | 9  | 0 | 0 | 0 |
| Tctex1d1      | 6  | 0 | 0 | 0 |
| Oma1          | 4  | 0 | 0 | 0 |
| Dab1          | 10 | 0 | 0 | 0 |
| Ppap2b        | 3  | 0 | 0 | 0 |
| Gm12727       | 1  | 0 | 0 | 0 |
| Dhcr24        | 1  | 0 | 0 | 0 |
| Pars2         | 2  | 0 | 0 | 0 |
| Ssbp3         | 7  | 0 | 0 | 0 |

|               |    |   |   |   |
|---------------|----|---|---|---|
| Tmem59        | 3  | 0 | 0 | 0 |
| Hspb11        | 2  | 0 | 0 | 0 |
| Yipf1         | 2  | 0 | 0 | 0 |
| Tmem48        | 4  | 0 | 0 | 0 |
| Magoh         | 1  | 0 | 0 | 0 |
| 0610037L13Rik | 7  | 0 | 0 | 0 |
| Echdc2        | 3  | 0 | 0 | 0 |
| 2010305A19Rik | 2  | 0 | 0 | 0 |
| Zcchc11       | 7  | 0 | 0 | 0 |
| Cc2d1b        | 4  | 0 | 0 | 0 |
| Nrd1          | 5  | 0 | 0 | 0 |
| Calr4         | 7  | 0 | 0 | 0 |
| Eps15         | 5  | 0 | 0 | 0 |
| Ttc39a        | 3  | 0 | 0 | 0 |
| Bend5         | 4  | 0 | 0 | 0 |
| Spata6        | 3  | 0 | 0 | 0 |
| Gm12821       | 1  | 0 | 0 | 0 |
| 9130206I24Rik | 6  | 0 | 0 | 0 |
| Stil          | 2  | 0 | 0 | 0 |
| Gm12833       | 2  | 0 | 0 | 0 |
| 4732418C07Rik | 3  | 0 | 0 | 0 |
| Atpaf1        | 3  | 0 | 0 | 0 |
| Lrrc41        | 4  | 0 | 0 | 0 |
| Pomgnt1       | 2  | 0 | 0 | 0 |
| Pik3r3        | 5  | 0 | 0 | 0 |
| Gpbp1l1       | 3  | 0 | 0 | 0 |
| Ccdc17        | 8  | 0 | 0 | 0 |
| Prdx1         | 2  | 0 | 0 | 0 |
| Ccdc163       | 16 | 0 | 0 | 0 |
| Tesk2         | 2  | 0 | 0 | 0 |
| Mutyh         | 3  | 0 | 0 | 0 |
| Zswim5        | 1  | 0 | 0 | 0 |
| Hectd3        | 4  | 0 | 0 | 0 |
| Tmem53        | 1  | 0 | 0 | 0 |
| Eri3          | 5  | 0 | 0 | 0 |
| Slc6a9        | 4  | 0 | 0 | 0 |
| Med8          | 2  | 0 | 0 | 0 |
| XLOC_023033   | 4  | 0 | 0 | 0 |
| Elovl1        | 3  | 0 | 0 | 0 |
| Ebna1bp2      | 5  | 0 | 0 | 0 |
| Slc2a1        | 3  | 0 | 0 | 0 |
| Ccdc23        | 1  | 0 | 0 | 0 |
| Cldn19        | 2  | 0 | 0 | 0 |
| Foxj3         | 5  | 0 | 0 | 0 |
| Hivep3        | 5  | 0 | 0 | 0 |
| Krc           | 4  | 0 | 0 | 0 |
| XLOC_023043   | 2  | 0 | 0 | 0 |

|               |    |   |   |   |
|---------------|----|---|---|---|
| Edn2          | 1  | 0 | 0 | 0 |
| Scmh1         | 6  | 0 | 0 | 0 |
| Cited4        | 1  | 0 | 0 | 0 |
| Rims3         | 4  | 0 | 0 | 0 |
| Col9a2        | 6  | 0 | 0 | 0 |
| Gm12892       | 1  | 0 | 0 | 0 |
| Ppt1          | 3  | 0 | 0 | 0 |
| Mycl1         | 1  | 0 | 0 | 0 |
| Trit1         | 8  | 0 | 0 | 0 |
| XLOC_023052   | 2  | 0 | 0 | 0 |
| Hpcal4        | 2  | 0 | 0 | 0 |
| Heyl          | 2  | 0 | 0 | 0 |
| Mycbp         | 1  | 0 | 0 | 0 |
| Fhl3          | 11 | 0 | 0 | 0 |
| Sf3a3         | 5  | 0 | 0 | 0 |
| Inpp5b        | 2  | 0 | 0 | 0 |
| Yrdc          | 4  | 0 | 0 | 0 |
| Epha10        | 3  | 0 | 0 | 0 |
| AK134673      | 10 | 0 | 0 | 0 |
| 9930104L06Rik | 3  | 0 | 0 | 0 |
| Gnl2          | 7  | 0 | 0 | 0 |
| Snip1         | 1  | 0 | 0 | 0 |
| 2310005N01Rik | 3  | 0 | 0 | 0 |
| Grik3         | 3  | 0 | 0 | 0 |
| Stk40         | 6  | 0 | 0 | 0 |
| Fam176b       | 4  | 0 | 0 | 0 |
| Trappc3       | 2  | 0 | 0 | 0 |
| 5730409E04Rik | 2  | 0 | 0 | 0 |
| Psmb2         | 1  | 0 | 0 | 0 |
| Sfpq          | 5  | 0 | 0 | 0 |
| Dlgap3        | 4  | 0 | 0 | 0 |
| BC003266      | 1  | 0 | 0 | 0 |
| XLOC_023094   | 8  | 0 | 0 | 0 |
| Csm2          | 6  | 0 | 0 | 0 |
| Phc2          | 5  | 0 | 0 | 0 |
| XLOC_023096   | 1  | 0 | 0 | 0 |
| A3galt2       | 2  | 0 | 0 | 0 |
| Trim62        | 2  | 0 | 0 | 0 |
| Ak2           | 5  | 0 | 0 | 0 |
| Rnf19b        | 4  | 0 | 0 | 0 |
| Tmem54        | 5  | 0 | 0 | 0 |
| Fndc5         | 5  | 0 | 0 | 0 |
| Yars          | 2  | 0 | 0 | 0 |
| AK077492      | 2  | 0 | 0 | 0 |
| Sync          | 2  | 0 | 0 | 0 |
| Bsdc1         | 1  | 0 | 0 | 0 |
| Ptp4a2        | 5  | 0 | 0 | 0 |



|               |    |   |   |   |
|---------------|----|---|---|---|
| Col16a1       | 8  | 0 | 0 | 0 |
| Pef1          | 4  | 0 | 0 | 0 |
| Snrnp40       | 2  | 0 | 0 | 0 |
| Nkain1        | 4  | 0 | 0 | 0 |
| Sdc3          | 3  | 0 | 0 | 0 |
| XLOC_023127   | 2  | 0 | 0 | 0 |
| XLOC_023128   | 2  | 0 | 0 | 0 |
| Mecr          | 2  | 0 | 0 | 0 |
| Srsf4         | 3  | 0 | 0 | 0 |
| Taf12         | 2  | 0 | 0 | 0 |
| Snhg12        | 1  | 0 | 0 | 0 |
| Dnajc8        | 4  | 0 | 0 | 0 |
| Ptafr         | 1  | 0 | 0 | 0 |
| Eya3          | 2  | 0 | 0 | 0 |
| Rpa2          | 1  | 0 | 0 | 0 |
| Ahdc1         | 5  | 0 | 0 | 0 |
| Wasf2         | 3  | 0 | 0 | 0 |
| XLOC_023144   | 1  | 0 | 0 | 0 |
| Slc9a1        | 3  | 0 | 0 | 0 |
| Ubxn11        | 10 | 0 | 0 | 0 |
| Pafah2        | 8  | 0 | 0 | 0 |
| Paqr7         | 4  | 0 | 0 | 0 |
| Rhd           | 3  | 0 | 0 | 0 |
| Syf2          | 2  | 0 | 0 | 0 |
| Runx3         | 2  | 0 | 0 | 0 |
| Srsf10        | 5  | 0 | 0 | 0 |
| Hmgcl         | 2  | 0 | 0 | 0 |
| Gale          | 5  | 0 | 0 | 0 |
| Id3           | 1  | 0 | 0 | 0 |
| E2f2          | 3  | 0 | 0 | 0 |
| Asap3         | 3  | 0 | 0 | 0 |
| Tcea3         | 3  | 0 | 0 | 0 |
| Zfp46         | 5  | 0 | 0 | 0 |
| Hnrnpr        | 5  | 0 | 0 | 0 |
| Gm17388       | 2  | 0 | 0 | 0 |
| 6030445D17Rik | 1  | 0 | 0 | 0 |
| Luzp1         | 3  | 0 | 0 | 0 |
| Gm13004       | 1  | 0 | 0 | 0 |
| Hspg2         | 9  | 0 | 0 | 0 |
| Usp48         | 8  | 0 | 0 | 0 |
| Rap1gap       | 5  | 0 | 0 | 0 |
| Ece1          | 3  | 0 | 0 | 0 |
| Hp1bp3        | 7  | 0 | 0 | 0 |
| Sh2d5         | 3  | 0 | 0 | 0 |
| Kif17         | 11 | 0 | 0 | 0 |
| Ddost         | 1  | 0 | 0 | 0 |
| Mul1          | 3  | 0 | 0 | 0 |

|               |    |   |   |   |
|---------------|----|---|---|---|
| Camk2n1       | 3  | 0 | 0 | 0 |
| Tmco4         | 7  | 0 | 0 | 0 |
| Capzb         | 1  | 0 | 0 | 0 |
| Akr7a5        | 1  | 0 | 0 | 0 |
| C230096C10Rik | 1  | 0 | 0 | 0 |
| Iffo2         | 4  | 0 | 0 | 0 |
| Aldh4a1       | 2  | 0 | 0 | 0 |
| Gm1667        | 2  | 0 | 0 | 0 |
| XLOC_023207   | 1  | 0 | 0 | 0 |
| Rcc2          | 5  | 0 | 0 | 0 |
| Sdhb          | 2  | 0 | 0 | 0 |
| Atp13a2       | 7  | 0 | 0 | 0 |
| Fbxo42        | 6  | 0 | 0 | 0 |
| XLOC_023214   | 2  | 0 | 0 | 0 |
| Arhgef19      | 7  | 0 | 0 | 0 |
| Hspb7         | 1  | 0 | 0 | 0 |
| Casp9         | 3  | 0 | 0 | 0 |
| XLOC_023226   | 2  | 0 | 0 | 0 |
| Anp32b-ps1    | 1  | 0 | 0 | 0 |
| Pramef8       | 2  | 0 | 0 | 0 |
| Gm13082       | 1  | 0 | 0 | 0 |
| Gm13152       | 6  | 0 | 0 | 0 |
| 2510039O18Rik | 2  | 0 | 0 | 0 |
| Nppb          | 1  | 0 | 0 | 0 |
| Mthfr         | 5  | 0 | 0 | 0 |
| Mad2l2        | 5  | 0 | 0 | 0 |
| Fbxo2         | 4  | 0 | 0 | 0 |
| Exosc10       | 2  | 0 | 0 | 0 |
| Srm           | 1  | 0 | 0 | 0 |
| Dffa          | 3  | 0 | 0 | 0 |
| Lzic          | 2  | 0 | 0 | 0 |
| Ctnnbip1      | 5  | 0 | 0 | 0 |
| Clstn1        | 6  | 0 | 0 | 0 |
| Gm13067       | 3  | 0 | 0 | 0 |
| Gpr157        | 1  | 0 | 0 | 0 |
| Gm5506        | 7  | 0 | 0 | 0 |
| Errfi1        | 1  | 0 | 0 | 0 |
| Dnajc11       | 2  | 0 | 0 | 0 |
| Klhl21        | 1  | 0 | 0 | 0 |
| Nol9          | 2  | 0 | 0 | 0 |
| mKIAA0720     | 10 | 0 | 0 | 0 |
| Tnfrsf25      | 3  | 0 | 0 | 0 |
| Gpr153        | 5  | 0 | 0 | 0 |
| Icmt          | 3  | 0 | 0 | 0 |
| Chd5          | 4  | 0 | 0 | 0 |
| A430005L14Rik | 2  | 0 | 0 | 0 |
| BC046331      | 3  | 0 | 0 | 0 |

|               |    |   |   |   |
|---------------|----|---|---|---|
| Lrrc47        | 1  | 0 | 0 | 0 |
| Megf6         | 6  | 0 | 0 | 0 |
| AK083203      | 1  | 0 | 0 | 0 |
| Hes5          | 2  | 0 | 0 | 0 |
| Pank4         | 3  | 0 | 0 | 0 |
| Pex10         | 2  | 0 | 0 | 0 |
| Morn1         | 7  | 0 | 0 | 0 |
| 2610002J02Rik | 5  | 0 | 0 | 0 |
| 2010015L04Rik | 7  | 0 | 0 | 0 |
| Gnb1          | 7  | 0 | 0 | 0 |
| Nadk          | 5  | 0 | 0 | 0 |
| XLOC_023310   | 1  | 0 | 0 | 0 |
| Cdk11b        | 9  | 0 | 0 | 0 |
| B930041F14Rik | 1  | 0 | 0 | 0 |
| Ssu72         | 6  | 0 | 0 | 0 |
| Mrpl20        | 3  | 0 | 0 | 0 |
| Aurkaip1      | 4  | 0 | 0 | 0 |
| Mxra8         | 8  | 0 | 0 | 0 |
| Dvl1          | 8  | 0 | 0 | 0 |
| Fam132a       | 4  | 0 | 0 | 0 |
| Sdf4          | 7  | 0 | 0 | 0 |
| XLOC_023328   | 1  | 0 | 0 | 0 |
| Tmem68        | 5  | 0 | 0 | 0 |
| Penk          | 2  | 0 | 0 | 0 |
| Impad1        | 1  | 0 | 0 | 0 |
| Nsmaf         | 5  | 0 | 0 | 0 |
| Tox           | 4  | 0 | 0 | 0 |
| Car8          | 3  | 0 | 0 | 0 |
| Asph          | 2  | 0 | 0 | 0 |
| Plekhf2       | 1  | 0 | 0 | 0 |
| 2310030N02Rik | 5  | 0 | 0 | 0 |
| AK080292      | 2  | 0 | 0 | 0 |
| Dpy19l4       | 5  | 0 | 0 | 0 |
| Pdp1          | 4  | 0 | 0 | 0 |
| Gm11843       | 1  | 0 | 0 | 0 |
| Fam92a        | 10 | 0 | 0 | 0 |
| Gm11826       | 1  | 0 | 0 | 0 |
| Otud6b        | 7  | 0 | 0 | 0 |
| Necab1        | 6  | 0 | 0 | 0 |
| Decr1         | 1  | 0 | 0 | 0 |
| Osgin2        | 5  | 0 | 0 | 0 |
| Rip2          | 6  | 0 | 0 | 0 |
| Cpne3         | 3  | 0 | 0 | 0 |
| Nkain3        | 4  | 0 | 0 | 0 |
| 2610029I01Rik | 1  | 0 | 0 | 0 |
| Ufl1          | 4  | 0 | 0 | 0 |
| 1810074P20Rik | 1  | 0 | 0 | 0 |

|               |    |   |   |   |
|---------------|----|---|---|---|
| Manea         | 5  | 0 | 0 | 0 |
| Gm11914       | 1  | 0 | 0 | 0 |
| XLOC_023380   | 3  | 0 | 0 | 0 |
| XLOC_023381   | 10 | 0 | 0 | 0 |
| Ankrd6        | 7  | 0 | 0 | 0 |
| Pm20d2        | 3  | 0 | 0 | 0 |
| Pnrc1         | 4  | 0 | 0 | 0 |
| Slc35a1       | 4  | 0 | 0 | 0 |
| 1700003M02Rik | 4  | 0 | 0 | 0 |
| 1810030N24Rik | 3  | 0 | 0 | 0 |
| 3110043O21Rik | 3  | 0 | 0 | 0 |
| Lingo2        | 8  | 0 | 0 | 0 |
| Topors        | 1  | 0 | 0 | 0 |
| Ndufb6        | 2  | 0 | 0 | 0 |
| Smu1          | 1  | 0 | 0 | 0 |
| B4galt1       | 3  | 0 | 0 | 0 |
| Bag1          | 2  | 0 | 0 | 0 |
| Nol6          | 5  | 0 | 0 | 0 |
| Ubap2         | 9  | 0 | 0 | 0 |
| Dcaf12        | 4  | 0 | 0 | 0 |
| Kif24         | 1  | 0 | 0 | 0 |
| Al464131      | 1  | 0 | 0 | 0 |
| 2310028H24Rik | 6  | 0 | 0 | 0 |
| Enho          | 1  | 0 | 0 | 0 |
| Cntfr         | 8  | 0 | 0 | 0 |
| 2810432D09Rik | 1  | 0 | 0 | 0 |
| Dctn3         | 1  | 0 | 0 | 0 |
| Sigmar1       | 1  | 0 | 0 | 0 |
| XLOC_023426   | 1  | 0 | 0 | 0 |
| Stoml2        | 2  | 0 | 0 | 0 |
| B230312A22Rik | 9  | 0 | 0 | 0 |
| Fam166b       | 1  | 0 | 0 | 0 |
| Rmrp          | 1  | 0 | 0 | 0 |
| E130306D19Rik | 3  | 0 | 0 | 0 |
| Tln1          | 3  | 0 | 0 | 0 |
| Gne           | 2  | 0 | 0 | 0 |
| Rnf38         | 8  | 0 | 0 | 0 |
| Zbtb5         | 4  | 0 | 0 | 0 |
| Fbxo10        | 3  | 0 | 0 | 0 |
| Tomm5         | 5  | 0 | 0 | 0 |
| Exosc3        | 2  | 0 | 0 | 0 |
| Mcart1        | 4  | 0 | 0 | 0 |
| Shb           | 2  | 0 | 0 | 0 |
| Tstd2         | 2  | 0 | 0 | 0 |
| 5830415F09Rik | 4  | 0 | 0 | 0 |
| Trim14        | 6  | 0 | 0 | 0 |
| Coro2a        | 3  | 0 | 0 | 0 |

|               |    |   |   |   |
|---------------|----|---|---|---|
| Tbc1d2        | 6  | 0 | 0 | 0 |
| Gabbr2        | 2  | 0 | 0 | 0 |
| Anks6         | 9  | 0 | 0 | 0 |
| Alg2          | 2  | 0 | 0 | 0 |
| Erp44         | 2  | 0 | 0 | 0 |
| Tex10         | 3  | 0 | 0 | 0 |
| 2810432L12Rik | 4  | 0 | 0 | 0 |
| Grin3a        | 3  | 0 | 0 | 0 |
| AK012547      | 1  | 0 | 0 | 0 |
| Abca1         | 3  | 0 | 0 | 0 |
| AI427809      | 5  | 0 | 0 | 0 |
| XLOC_023480   | 1  | 0 | 0 | 0 |
| Klf4          | 2  | 0 | 0 | 0 |
| Cttnal1       | 7  | 0 | 0 | 0 |
| D730040F13Rik | 6  | 0 | 0 | 0 |
| 6430704M03Rik | 2  | 0 | 0 | 0 |
| Ptpn3         | 6  | 0 | 0 | 0 |
| Txn1          | 6  | 0 | 0 | 0 |
| Lpar1         | 4  | 0 | 0 | 0 |
| Ptgr1         | 1  | 0 | 0 | 0 |
| Susd1         | 8  | 0 | 0 | 0 |
| 1110054O05Rik | 4  | 0 | 0 | 0 |
| Zfp37         | 4  | 0 | 0 | 0 |
| Fkbp15        | 7  | 0 | 0 | 0 |
| Cdc26         | 4  | 0 | 0 | 0 |
| Wdr31         | 6  | 0 | 0 | 0 |
| Hdhd3         | 1  | 0 | 0 | 0 |
| Pole3         | 1  | 0 | 0 | 0 |
| Whrn          | 6  | 0 | 0 | 0 |
| Tnc           | 6  | 0 | 0 | 0 |
| Astn2         | 4  | 0 | 0 | 0 |
| Dbc1          | 4  | 0 | 0 | 0 |
| Gm11223       | 1  | 0 | 0 | 0 |
| Gm11224       | 1  | 0 | 0 | 0 |
| Megf9         | 1  | 0 | 0 | 0 |
| Tle1          | 14 | 0 | 0 | 0 |
| 3110001D03Rik | 2  | 0 | 0 | 0 |
| Mpdz          | 10 | 0 | 0 | 0 |
| Nfib          | 4  | 0 | 0 | 0 |
| Zdhhc21       | 5  | 0 | 0 | 0 |
| Cer1          | 2  | 0 | 0 | 0 |
| Frem1         | 10 | 0 | 0 | 0 |
| Ttc39b        | 3  | 0 | 0 | 0 |
| Psip1         | 4  | 0 | 0 | 0 |
| Bnc2          | 7  | 0 | 0 | 0 |
| Haus6         | 3  | 0 | 0 | 0 |
| Plin2         | 7  | 0 | 0 | 0 |

|               |    |   |   |   |
|---------------|----|---|---|---|
| Slc24a2       | 6  | 0 | 0 | 0 |
| Mllt3         | 4  | 0 | 0 | 0 |
| Ptplad2       | 2  | 0 | 0 | 0 |
| Klhl9         | 1  | 0 | 0 | 0 |
| Cdkn2a        | 2  | 0 | 0 | 0 |
| Cdkn2b        | 1  | 0 | 0 | 0 |
| XLOC_023557   | 5  | 0 | 0 | 0 |
| XLOC_023559   | 1  | 0 | 0 | 0 |
| Elavl2        | 8  | 0 | 0 | 0 |
| Gm12669       | 1  | 0 | 0 | 0 |
| Tusc1         | 1  | 0 | 0 | 0 |
| AK080222      | 2  | 0 | 0 | 0 |
| 5830433M19Rik | 3  | 0 | 0 | 0 |
| Plaa          | 5  | 0 | 0 | 0 |
| 4930579C15Rik | 4  | 0 | 0 | 0 |
| Mysm1         | 3  | 0 | 0 | 0 |
| Cyp2j13       | 3  | 0 | 0 | 0 |
| Cyp2j6        | 1  | 0 | 0 | 0 |
| Cyp2j9        | 1  | 0 | 0 | 0 |
| E130114P18Rik | 4  | 0 | 0 | 0 |
| Tm2d1         | 7  | 0 | 0 | 0 |
| Kank4         | 4  | 0 | 0 | 0 |
| Dock7         | 8  | 0 | 0 | 0 |
| Gm12688       | 3  | 0 | 0 | 0 |
| Itgb3bp       | 3  | 0 | 0 | 0 |
| Gm12699       | 1  | 0 | 0 | 0 |
| Jak1          | 8  | 0 | 0 | 0 |
| Gm12799       | 1  | 0 | 0 | 0 |
| InsI5         | 3  | 0 | 0 | 0 |
| Slc35d1       | 3  | 0 | 0 | 0 |
| Prkaa2        | 4  | 0 | 0 | 0 |
| Gm12722       | 1  | 0 | 0 | 0 |
| Pcsk9         | 6  | 0 | 0 | 0 |
| BC055111      | 2  | 0 | 0 | 0 |
| Ttc4          | 7  | 0 | 0 | 0 |
| Gm1027        | 11 | 0 | 0 | 0 |
| Acot11        | 3  | 0 | 0 | 0 |
| Mrpl37        | 1  | 0 | 0 | 0 |
| Gm12908       | 1  | 0 | 0 | 0 |
| Cpt2          | 1  | 0 | 0 | 0 |
| Scp2          | 3  | 0 | 0 | 0 |
| Zyg11b        | 5  | 0 | 0 | 0 |
| Fam159a       | 4  | 0 | 0 | 0 |
| Gpx7          | 3  | 0 | 0 | 0 |
| Zfyve9        | 6  | 0 | 0 | 0 |
| Osbpl9        | 3  | 0 | 0 | 0 |
| AK148461      | 4  | 0 | 0 | 0 |

|               |    |   |   |   |
|---------------|----|---|---|---|
| Rnf11         | 1  | 0 | 0 | 0 |
| Cdkn2c        | 2  | 0 | 0 | 0 |
| Elavl4        | 7  | 0 | 0 | 0 |
| Gm12818       | 1  | 0 | 0 | 0 |
| Cmpk1         | 3  | 0 | 0 | 0 |
| Cyp4x1        | 2  | 0 | 0 | 0 |
| 4930544O15Rik | 2  | 0 | 0 | 0 |
| Faah          | 1  | 0 | 0 | 0 |
| Nsun4         | 4  | 0 | 0 | 0 |
| Uqcrh         | 2  | 0 | 0 | 0 |
| 1520402A15Rik | 2  | 0 | 0 | 0 |
| Tmem69        | 2  | 0 | 0 | 0 |
| Akr1a4        | 3  | 0 | 0 | 0 |
| Mmachc        | 1  | 0 | 0 | 0 |
| Toe1          | 6  | 0 | 0 | 0 |
| Plk3          | 2  | 0 | 0 | 0 |
| Rnf220        | 4  | 0 | 0 | 0 |
| Atp6v0b       | 2  | 0 | 0 | 0 |
| Dph2          | 3  | 0 | 0 | 0 |
| Ipo13         | 11 | 0 | 0 | 0 |
| St3gal3       | 6  | 0 | 0 | 0 |
| Kdm4a         | 4  | 0 | 0 | 0 |
| Ptprf         | 7  | 0 | 0 | 0 |
| Szt2          | 10 | 0 | 0 | 0 |
| Gm12858       | 1  | 0 | 0 | 0 |
| Tie1          | 3  | 0 | 0 | 0 |
| Zfp691        | 3  | 0 | 0 | 0 |
| AU022252      | 4  | 0 | 0 | 0 |
| Ybx1          | 7  | 0 | 0 | 0 |
| Ccdc30        | 3  | 0 | 0 | 0 |
| Ppcs          | 5  | 0 | 0 | 0 |
| Rimk1a        | 4  | 0 | 0 | 0 |
| Foxo6         | 1  | 0 | 0 | 0 |
| Ctps          | 3  | 0 | 0 | 0 |
| Kcnq4         | 4  | 0 | 0 | 0 |
| Dem1          | 2  | 0 | 0 | 0 |
| Smad2         | 4  | 0 | 0 | 0 |
| Zmpste24      | 1  | 0 | 0 | 0 |
| Rlf           | 5  | 0 | 0 | 0 |
| Gm12873       | 2  | 0 | 0 | 0 |
| Cap1          | 3  | 0 | 0 | 0 |
| Mfsd2a        | 4  | 0 | 0 | 0 |
| Ppie          | 2  | 0 | 0 | 0 |
| Ndufs5        | 3  | 0 | 0 | 0 |
| Akirin1       | 6  | 0 | 0 | 0 |
| Utp11l        | 1  | 0 | 0 | 0 |
| Cdca8         | 1  | 0 | 0 | 0 |

|             |    |   |   |   |
|-------------|----|---|---|---|
| Zc3h12a     | 2  | 0 | 0 | 0 |
| Mtap7d1     | 9  | 0 | 0 | 0 |
| Adprhl2     | 5  | 0 | 0 | 0 |
| Tekt2       | 3  | 0 | 0 | 0 |
| Eif2c3      | 5  | 0 | 0 | 0 |
| Eif2c1      | 3  | 0 | 0 | 0 |
| Ncdn        | 8  | 0 | 0 | 0 |
| Zmym4       | 6  | 0 | 0 | 0 |
| Gja4        | 1  | 0 | 0 | 0 |
| XLOC_023729 | 2  | 0 | 0 | 0 |
| Zscan20     | 3  | 0 | 0 | 0 |
| Zfp362      | 5  | 0 | 0 | 0 |
| Adc         | 11 | 0 | 0 | 0 |
| S100pbp     | 3  | 0 | 0 | 0 |
| C77080      | 6  | 0 | 0 | 0 |
| Zbtb8b      | 2  | 0 | 0 | 0 |
| Lck         | 2  | 0 | 0 | 0 |
| Fam167b     | 2  | 0 | 0 | 0 |
| Eif3i       | 6  | 0 | 0 | 0 |
| Txlna       | 7  | 0 | 0 | 0 |
| Kpna6       | 6  | 0 | 0 | 0 |
| Khdrbs1     | 1  | 0 | 0 | 0 |
| Hcrtr1      | 5  | 0 | 0 | 0 |
| Tinagl1     | 1  | 0 | 0 | 0 |
| Serinc2     | 5  | 0 | 0 | 0 |
| Zcchc17     | 3  | 0 | 0 | 0 |
| XLOC_023758 | 2  | 0 | 0 | 0 |
| Ptpu        | 8  | 0 | 0 | 0 |
| AK047558    | 2  | 0 | 0 | 0 |
| Oprd1       | 1  | 0 | 0 | 0 |
| Ythdf2      | 2  | 0 | 0 | 0 |
| Gmeb1       | 6  | 0 | 0 | 0 |
| Rab42-ps    | 1  | 0 | 0 | 0 |
| Trnau1ap    | 6  | 0 | 0 | 0 |
| Rcc1        | 5  | 0 | 0 | 0 |
| Snhg3       | 1  | 0 | 0 | 0 |
| Phactr4     | 6  | 0 | 0 | 0 |
| Med18       | 1  | 0 | 0 | 0 |
| Sesn2       | 1  | 0 | 0 | 0 |
| Atpif1      | 7  | 0 | 0 | 0 |
| Xkr8        | 1  | 0 | 0 | 0 |
| Ppp1r8      | 4  | 0 | 0 | 0 |
| Stx12       | 6  | 0 | 0 | 0 |
| Fam76a      | 3  | 0 | 0 | 0 |
| Gpr3        | 4  | 0 | 0 | 0 |
| Tmem222     | 3  | 0 | 0 | 0 |
| Wdtdc1      | 6  | 0 | 0 | 0 |



|               |   |   |   |   |
|---------------|---|---|---|---|
| Trnp1         | 3 | 0 | 0 | 0 |
| Nudc          | 4 | 0 | 0 | 0 |
| Zdhhc18       | 7 | 0 | 0 | 0 |
| Pigv          | 6 | 0 | 0 | 0 |
| Arid1a        | 5 | 0 | 0 | 0 |
| Rps6ka1       | 4 | 0 | 0 | 0 |
| Hmgn2         | 6 | 0 | 0 | 0 |
| Dhdds         | 5 | 0 | 0 | 0 |
| Sh3bgrl3      | 2 | 0 | 0 | 0 |
| Ccdc21        | 3 | 0 | 0 | 0 |
| Gm7534        | 4 | 0 | 0 | 0 |
| Zfp593        | 1 | 0 | 0 | 0 |
| Grrp1         | 4 | 0 | 0 | 0 |
| Pdik1l        | 2 | 0 | 0 | 0 |
| Fam54b        | 6 | 0 | 0 | 0 |
| Sepn1         | 7 | 0 | 0 | 0 |
| Man1c1        | 4 | 0 | 0 | 0 |
| Ldlrap1       | 2 | 0 | 0 | 0 |
| Tmem57        | 5 | 0 | 0 | 0 |
| Tmem50a       | 4 | 0 | 0 | 0 |
| Clic4         | 1 | 0 | 0 | 0 |
| Srrm1         | 5 | 0 | 0 | 0 |
| Rcan3         | 3 | 0 | 0 | 0 |
| Pnrc2         | 2 | 0 | 0 | 0 |
| Lypla2        | 1 | 0 | 0 | 0 |
| 1110049F12Rik | 4 | 0 | 0 | 0 |
| Tceb3         | 1 | 0 | 0 | 0 |
| Rpl11         | 6 | 0 | 0 | 0 |
| Kdm1a         | 3 | 0 | 0 | 0 |
| C1qb          | 2 | 0 | 0 | 0 |
| Epha8         | 8 | 0 | 0 | 0 |
| Cdc42         | 9 | 0 | 0 | 0 |
| Alpl          | 2 | 0 | 0 | 0 |
| Pink1         | 3 | 0 | 0 | 0 |
| Cda           | 3 | 0 | 0 | 0 |
| Otud3         | 2 | 0 | 0 | 0 |
| Htr6          | 1 | 0 | 0 | 0 |
| Nbl1          | 4 | 0 | 0 | 0 |
| 2310028O11Rik | 4 | 0 | 0 | 0 |
| Gm16287       | 1 | 0 | 0 | 0 |
| Pqlc2         | 7 | 0 | 0 | 0 |
| Igsf21        | 5 | 0 | 0 | 0 |
| Arhgef10l     | 8 | 0 | 0 | 0 |
| Padi4         | 2 | 0 | 0 | 0 |
| Necap2        | 4 | 0 | 0 | 0 |
| D4Ertd22e     | 6 | 0 | 0 | 0 |
| Gm694         | 1 | 0 | 0 | 0 |

|               |    |   |   |   |
|---------------|----|---|---|---|
| Spen          | 7  | 0 | 0 | 0 |
| Fblim1        | 2  | 0 | 0 | 0 |
| Plekhm2       | 7  | 0 | 0 | 0 |
| Ddi2          | 5  | 0 | 0 | 0 |
| Dnajc16       | 4  | 0 | 0 | 0 |
| Efhd2         | 2  | 0 | 0 | 0 |
| 9030409G11Rik | 6  | 0 | 0 | 0 |
| Prdm2         | 8  | 0 | 0 | 0 |
| Pdpn          | 2  | 0 | 0 | 0 |
| Vps13d        | 12 | 0 | 0 | 0 |
| Tnfrsf1b      | 3  | 0 | 0 | 0 |
| 2610305D13Rik | 3  | 0 | 0 | 0 |
| Gm13157       | 8  | 0 | 0 | 0 |
| Zfp933        | 4  | 0 | 0 | 0 |
| Miip          | 7  | 0 | 0 | 0 |
| Mfn2          | 4  | 0 | 0 | 0 |
| Plod1         | 2  | 0 | 0 | 0 |
| Agtrap        | 2  | 0 | 0 | 0 |
| Fbxo44        | 4  | 0 | 0 | 0 |
| Ptchd2        | 1  | 0 | 0 | 0 |
| Tardbp        | 7  | 0 | 0 | 0 |
| Apitd1        | 3  | 0 | 0 | 0 |
| Rpsa-ps12     | 1  | 0 | 0 | 0 |
| Pgd           | 4  | 0 | 0 | 0 |
| Kif1b         | 7  | 0 | 0 | 0 |
| Ube4b         | 5  | 0 | 0 | 0 |
| Rbp7          | 1  | 0 | 0 | 0 |
| Nmnat1        | 4  | 0 | 0 | 0 |
| XLOC_023915   | 1  | 0 | 0 | 0 |
| Pik3cd        | 3  | 0 | 0 | 0 |
| Tmem201       | 6  | 0 | 0 | 0 |
| Slc25a33      | 2  | 0 | 0 | 0 |
| Gm13073       | 2  | 0 | 0 | 0 |
| Spsb1         | 6  | 0 | 0 | 0 |
| H6pd          | 4  | 0 | 0 | 0 |
| Slc45a1       | 2  | 0 | 0 | 0 |
| Park7         | 3  | 0 | 0 | 0 |
| Vamp3         | 1  | 0 | 0 | 0 |
| Camta1        | 9  | 0 | 0 | 0 |
| Thap3         | 1  | 0 | 0 | 0 |
| Phf13         | 3  | 0 | 0 | 0 |
| Espn          | 5  | 0 | 0 | 0 |
| Hes3          | 3  | 0 | 0 | 0 |
| Kcnab2        | 7  | 0 | 0 | 0 |
| Dffb          | 6  | 0 | 0 | 0 |
| 1190007F08Rik | 2  | 0 | 0 | 0 |
| Tprgl         | 4  | 0 | 0 | 0 |

|               |    |   |   |   |
|---------------|----|---|---|---|
| Arhgef16      | 2  | 0 | 0 | 0 |
| 5930403L14Rik | 1  | 0 | 0 | 0 |
| 2810405K02Rik | 1  | 0 | 0 | 0 |
| Tnfrsf14      | 4  | 0 | 0 | 0 |
| Plch2         | 6  | 0 | 0 | 0 |
| Rer1          | 2  | 0 | 0 | 0 |
| Ski           | 6  | 0 | 0 | 0 |
| Prkcz         | 11 | 0 | 0 | 0 |
| Gabrd         | 4  | 0 | 0 | 0 |
| Atad3a        | 11 | 0 | 0 | 0 |
| Vwa1          | 4  | 0 | 0 | 0 |
| Gltpd1        | 2  | 0 | 0 | 0 |
| Agrn          | 15 | 0 | 0 | 0 |
| Isg15         | 1  | 0 | 0 | 0 |
| Plekhn1       | 11 | 0 | 0 | 0 |
| XLOC_022700   | 2  | 0 | 0 | 0 |
| Rbm12b        | 2  | 0 | 0 | 0 |
| Mmp16         | 1  | 0 | 0 | 0 |
| Coq3          | 3  | 0 | 0 | 0 |
| XLOC_022742   | 1  | 0 | 0 | 0 |
| Bach2         | 3  | 0 | 0 | 0 |
| Mdn1          | 6  | 0 | 0 | 0 |
| Gm12371       | 2  | 0 | 0 | 0 |
| Dnaja1        | 4  | 0 | 0 | 0 |
| Il11ra1       | 2  | 0 | 0 | 0 |
| XLOC_022782   | 1  | 0 | 0 | 0 |
| Tmem8b        | 2  | 0 | 0 | 0 |
| XLOC_022822   | 1  | 0 | 0 | 0 |
| Invs          | 2  | 0 | 0 | 0 |
| Gm12482       | 1  | 0 | 0 | 0 |
| XLOC_022880   | 2  | 0 | 0 | 0 |
| AK131821      | 2  | 0 | 0 | 0 |
| XLOC_022897   | 1  | 0 | 0 | 0 |
| Kdm4c         | 5  | 0 | 0 | 0 |
| BC042782      | 4  | 0 | 0 | 0 |
| XLOC_022929   | 2  | 0 | 0 | 0 |
| Foxd3         | 1  | 0 | 0 | 0 |
| Efcab7        | 4  | 0 | 0 | 0 |
| Fam151a       | 2  | 0 | 0 | 0 |
| XLOC_022974   | 2  | 0 | 0 | 0 |
| Glis1         | 6  | 0 | 0 | 0 |
| Agbl4         | 2  | 0 | 0 | 0 |
| 4732418C07Rik | 3  | 0 | 0 | 0 |
| AK078255      | 2  | 0 | 0 | 0 |
| Ptch2         | 5  | 0 | 0 | 0 |
| XLOC_023028   | 1  | 0 | 0 | 0 |
| Hyi           | 2  | 0 | 0 | 0 |

|               |   |   |   |   |
|---------------|---|---|---|---|
| Mtf1          | 1 | 0 | 0 | 0 |
| Mrps15        | 1 | 0 | 0 | 0 |
| Lsm10         | 2 | 0 | 0 | 0 |
| XLOC_023076   | 1 | 0 | 0 | 0 |
| mKIAA1884     | 2 | 0 | 0 | 0 |
| XLOC_023107   | 2 | 0 | 0 | 0 |
| Zbtb8os       | 4 | 0 | 0 | 0 |
| 2510006D16Rik | 4 | 0 | 0 | 0 |
| AK005651      | 1 | 0 | 0 | 0 |
| Cd164l2       | 4 | 0 | 0 | 0 |
| ASK2          | 1 | 0 | 0 | 0 |
| Fam46b        | 1 | 0 | 0 | 0 |
| Nr0b2         | 1 | 0 | 0 | 0 |
| 2610002D18Rik | 2 | 0 | 0 | 0 |
| D4Wsu53e      | 2 | 0 | 0 | 0 |
| Fuca1         | 1 | 0 | 0 | 0 |
| XLOC_023166   | 1 | 0 | 0 | 0 |
| XLOC_023182   | 1 | 0 | 0 | 0 |
| Padi2         | 3 | 0 | 0 | 0 |
| Mfap2         | 2 | 0 | 0 | 0 |
| AK019631      | 2 | 0 | 0 | 0 |
| Gm10565       | 2 | 0 | 0 | 0 |
| Masp2         | 1 | 0 | 0 | 0 |
| Casz1         | 3 | 0 | 0 | 0 |
| Rpl22         | 3 | 0 | 0 | 0 |
| Wdr8          | 3 | 0 | 0 | 0 |
| Slc35e2       | 4 | 0 | 0 | 0 |
| Gm5151        | 4 | 0 | 0 | 0 |
| 2610204G22Rik | 4 | 0 | 0 | 0 |
| Ccnl2         | 3 | 0 | 0 | 0 |
| AK172315      | 1 | 0 | 0 | 0 |
| AW011738      | 1 | 0 | 0 | 0 |
| 2310042D19Rik | 1 | 0 | 0 | 0 |
| 4933421O10Rik | 1 | 0 | 0 | 0 |
| 3110043O21Rik | 3 | 0 | 0 | 0 |
| Aptx          | 7 | 0 | 0 | 0 |
| Ccl27a        | 2 | 0 | 0 | 0 |
| Hint2         | 2 | 0 | 0 | 0 |
| 4930412F15Rik | 2 | 0 | 0 | 0 |
| XLOC_023464   | 4 | 0 | 0 | 0 |
| Mrpl50        | 1 | 0 | 0 | 0 |
| AI314180      | 4 | 0 | 0 | 0 |
| Mup20         | 2 | 0 | 0 | 0 |
| Gm12414       | 3 | 0 | 0 | 0 |
| AK079280      | 2 | 0 | 0 | 0 |
| Cyp2j12-ps    | 4 | 0 | 0 | 0 |
| Wdr78         | 4 | 0 | 0 | 0 |

|               |   |   |   |   |
|---------------|---|---|---|---|
| Prpf38a       | 3 | 0 | 0 | 0 |
| Btf3l4        | 3 | 0 | 0 | 0 |
| Urod          | 2 | 0 | 0 | 0 |
| Gm1661        | 3 | 0 | 0 | 0 |
| Dmap1         | 4 | 0 | 0 | 0 |
| Ccdc24        | 1 | 0 | 0 | 0 |
| Wdr65         | 3 | 0 | 0 | 0 |
| AA415398      | 4 | 0 | 0 | 0 |
| Nfyc          | 9 | 0 | 0 | 0 |
| CK137956      | 1 | 0 | 0 | 0 |
| AK019743      | 2 | 0 | 0 | 0 |
| Zbtb8a        | 1 | 0 | 0 | 0 |
| Gm12963       | 4 | 0 | 0 | 0 |
| A330049M08Rik | 5 | 0 | 0 | 0 |
| Nipal3        | 6 | 0 | 0 | 0 |
| Pla2g5        | 1 | 0 | 0 | 0 |
| AK040418      | 1 | 0 | 0 | 0 |
| Fhad1         | 5 | 0 | 0 | 0 |
| Gm13240       | 1 | 0 | 0 | 0 |
| Gm13136       | 1 | 0 | 0 | 0 |
| Clcn6         | 4 | 0 | 0 | 0 |
| Gm13077       | 1 | 0 | 0 | 0 |
| Mmp23         | 2 | 0 | 0 | 0 |
| Tmem88b       | 1 | 0 | 0 | 0 |
| Ccne2         | 1 | 0 | 0 | 0 |
| C430048L16Rik | 3 | 0 | 0 | 0 |
| Gm11872       | 1 | 0 | 0 | 0 |
| Gpr63         | 1 | 0 | 0 | 0 |
| AK045932      | 1 | 0 | 0 | 0 |
| Dnaic1        | 2 | 0 | 0 | 0 |
| Car9          | 2 | 0 | 0 | 0 |
| Melk          | 1 | 0 | 0 | 0 |
| XLOC_022806   | 3 | 0 | 0 | 0 |
| Gm12430       | 1 | 0 | 0 | 0 |
| XLOC_022861   | 1 | 0 | 0 | 0 |
| 4933430I17Rik | 1 | 0 | 0 | 0 |
| Gm11210       | 1 | 0 | 0 | 0 |
| C630043F03Rik | 1 | 0 | 0 | 0 |
| XLOC_022903   | 1 | 0 | 0 | 0 |
| XLOC_022930   | 1 | 0 | 0 | 0 |
| Cyb5rl        | 1 | 0 | 0 | 0 |
| Orc1          | 1 | 0 | 0 | 0 |
| Rab3b         | 1 | 0 | 0 | 0 |
| XLOC_023009   | 3 | 0 | 0 | 0 |
| AK010894      | 1 | 0 | 0 | 0 |
| Csf3r         | 7 | 0 | 0 | 0 |
| AK019262      | 1 | 0 | 0 | 0 |

|               |   |   |   |   |
|---------------|---|---|---|---|
| Fabp3         | 2 | 0 | 0 | 0 |
| Laptm5        | 3 | 0 | 0 | 0 |
| XLOC_023195   | 1 | 0 | 0 | 0 |
| Epha2         | 3 | 0 | 0 | 0 |
| XLOC_023224   | 1 | 0 | 0 | 0 |
| Gm833         | 1 | 0 | 0 | 0 |
| Tnfrsf18      | 1 | 0 | 0 | 0 |
| Rps20         | 3 | 0 | 0 | 0 |
| Igfbpl1       | 1 | 0 | 0 | 0 |
| XLOC_023465   | 2 | 0 | 0 | 0 |
| XLOC_023564   | 1 | 0 | 0 | 0 |
| XLOC_023606   | 1 | 0 | 0 | 0 |
| XLOC_023686   | 1 | 0 | 0 | 0 |
| Zfp69         | 1 | 0 | 0 | 0 |
| XLOC_023717   | 1 | 0 | 0 | 0 |
| Padi1         | 1 | 0 | 0 | 0 |
| XLOC_023867   | 2 | 0 | 0 | 0 |
| XLOC_023929   | 1 | 0 | 0 | 0 |
| Tas1r1        | 3 | 0 | 0 | 0 |
| Rnf207        | 2 | 0 | 0 | 0 |
| Fsbp          | 1 | 0 | 0 | 0 |
| XLOC_022712   | 1 | 0 | 0 | 0 |
| Creb3         | 1 | 0 | 0 | 0 |
| Hrct1         | 1 | 0 | 0 | 0 |
| XLOC_022807   | 1 | 0 | 0 | 0 |
| AK019691      | 1 | 0 | 0 | 0 |
| Ak4           | 1 | 0 | 0 | 0 |
| Gm12824       | 1 | 0 | 0 | 0 |
| Gm12848       | 1 | 0 | 0 | 0 |
| Meaf6         | 1 | 0 | 0 | 0 |
| Fgr           | 3 | 0 | 0 | 0 |
| XLOC_023173   | 1 | 0 | 0 | 0 |
| XLOC_023181   | 1 | 0 | 0 | 0 |
| XLOC_023183   | 1 | 0 | 0 | 0 |
| XLOC_023199   | 2 | 0 | 0 | 0 |
| AK145533      | 1 | 0 | 0 | 0 |
| Slc2a5        | 4 | 0 | 0 | 0 |
| Mmel1         | 1 | 0 | 0 | 0 |
| C030017K20Rik | 1 | 0 | 0 | 0 |
| AK035229      | 2 | 0 | 0 | 0 |
| asp3          | 1 | 0 | 0 | 0 |
| Gm13307       | 1 | 0 | 0 | 0 |
| Spag8         | 1 | 0 | 0 | 0 |
| AK141187      | 5 | 0 | 0 | 0 |
| XLOC_023520   | 4 | 0 | 0 | 0 |
| XLOC_023558   | 1 | 0 | 0 | 0 |
| XLOC_023578   | 2 | 0 | 0 | 0 |

|               |   |   |   |   |
|---------------|---|---|---|---|
| AK005616      | 1 | 0 | 0 | 0 |
| Extl1         | 2 | 0 | 0 | 0 |
| Padi3         | 1 | 0 | 0 | 0 |
| Ubiad1        | 1 | 0 | 0 | 0 |
| XLOC_023904   | 1 | 0 | 0 | 0 |
| Tas1r3        | 1 | 0 | 0 | 0 |
| Gm11841       | 1 | 0 | 0 | 0 |
| XLOC_022757   | 1 | 0 | 0 | 0 |
| 1700055D18Rik | 1 | 0 | 0 | 0 |
| XLOC_022843   | 1 | 0 | 0 | 0 |
| Snapc3        | 1 | 0 | 0 | 0 |
| AK031234      | 1 | 0 | 0 | 0 |
| XLOC_023147   | 1 | 0 | 0 | 0 |
| Gm13051       | 1 | 0 | 0 | 0 |
| XLOC_023314   | 1 | 0 | 0 | 0 |
| Gm13305       | 1 | 0 | 0 | 0 |
| Gm11488       | 1 | 0 | 0 | 0 |
| Gm11413       | 1 | 0 | 0 | 0 |
| Gm12666       | 1 | 0 | 0 | 0 |
| Ppih          | 2 | 0 | 0 | 0 |
| Bmp8a         | 1 | 0 | 0 | 0 |
| Slc25a34      | 2 | 0 | 0 | 0 |
| AK005641      | 1 | 0 | 0 | 0 |
| XLOC_022761   | 1 | 0 | 0 | 0 |
| XLOC_022825   | 1 | 0 | 0 | 0 |
| AK042990      | 1 | 0 | 0 | 0 |
| AK076859      | 1 | 0 | 0 | 0 |
| AU040320      | 1 | 0 | 0 | 0 |
| XLOC_023155   | 1 | 0 | 0 | 0 |
| Myom3         | 1 | 0 | 0 | 0 |
| nssr 1        | 1 | 0 | 0 | 0 |
| XLOC_023236   | 1 | 0 | 0 | 0 |
| XLOC_023283   | 1 | 0 | 0 | 0 |
| XLOC_023327   | 1 | 0 | 0 | 0 |
| XLOC_023379   | 1 | 0 | 0 | 0 |
| XLOC_023382   | 1 | 0 | 0 | 0 |
| AK048672      | 2 | 0 | 0 | 0 |
| Rnf183        | 1 | 0 | 0 | 0 |
| XLOC_023575   | 2 | 0 | 0 | 0 |
| AK054420      | 1 | 0 | 0 | 0 |
| Cd52          | 1 | 0 | 0 | 0 |
| Gm10560       | 1 | 0 | 0 | 0 |
| Gm15772       | 1 | 0 | 0 | 0 |
| Cdk6          | 4 | 0 | 0 | 0 |
| Fam133b       | 1 | 0 | 0 | 0 |
| Krit1         | 4 | 0 | 0 | 0 |
| Akap9         | 5 | 0 | 0 | 0 |

|               |    |   |   |   |
|---------------|----|---|---|---|
| Gm9897        | 2  | 0 | 0 | 0 |
| Gm8773        | 2  | 0 | 0 | 0 |
| XLOC_025083   | 1  | 0 | 0 | 0 |
| Gm8802        | 1  | 0 | 0 | 0 |
| Steap4        | 1  | 0 | 0 | 0 |
| Sri           | 1  | 0 | 0 | 0 |
| Slc25a40      | 9  | 0 | 0 | 0 |
| 4930420K17Rik | 2  | 0 | 0 | 0 |
| 9330182L06Rik | 5  | 0 | 0 | 0 |
| 4933402N22Rik | 5  | 0 | 0 | 0 |
| Sema3d        | 2  | 0 | 0 | 0 |
| Sema3e        | 1  | 0 | 0 | 0 |
| Pclo          | 8  | 0 | 0 | 0 |
| Cacna2d1      | 6  | 0 | 0 | 0 |
| Hgf           | 2  | 0 | 0 | 0 |
| Sema3c        | 1  | 0 | 0 | 0 |
| Tmem60        | 2  | 0 | 0 | 0 |
| Pion          | 7  | 0 | 0 | 0 |
| Fgl2          | 1  | 0 | 0 | 0 |
| Fam185a       | 3  | 0 | 0 | 0 |
| Lrrc17        | 2  | 0 | 0 | 0 |
| Gm6543        | 1  | 0 | 0 | 0 |
| Armc10        | 7  | 0 | 0 | 0 |
| Pmpcb         | 1  | 0 | 0 | 0 |
| Psmc2         | 2  | 0 | 0 | 0 |
| AK044020      | 2  | 0 | 0 | 0 |
| Lhfp13        | 6  | 0 | 0 | 0 |
| Mll5          | 1  | 0 | 0 | 0 |
| Rint1         | 3  | 0 | 0 | 0 |
| Klhl7         | 2  | 0 | 0 | 0 |
| Nup12         | 1  | 0 | 0 | 0 |
| Accn3         | 3  | 0 | 0 | 0 |
| Agap3         | 9  | 0 | 0 | 0 |
| Chpf2         | 2  | 0 | 0 | 0 |
| Nub1          | 5  | 0 | 0 | 0 |
| XLOC_025135   | 2  | 0 | 0 | 0 |
| Galnt11       | 1  | 0 | 0 | 0 |
| Actr3b        | 5  | 0 | 0 | 0 |
| Dpp6          | 10 | 0 | 0 | 0 |
| Htr5a         | 5  | 0 | 0 | 0 |
| Insig1        | 1  | 0 | 0 | 0 |
| Rbm33         | 10 | 0 | 0 | 0 |
| Rnf32         | 4  | 0 | 0 | 0 |
| Nom1          | 3  | 0 | 0 | 0 |
| Ube3c         | 7  | 0 | 0 | 0 |
| Dnajb6        | 3  | 0 | 0 | 0 |
| Hadhb         | 5  | 0 | 0 | 0 |



|               |   |   |   |   |
|---------------|---|---|---|---|
| Ept1          | 5 | 0 | 0 | 0 |
| Kcnk3         | 2 | 0 | 0 | 0 |
| 4930471M23Rik | 1 | 0 | 0 | 0 |
| Cenp-a        | 2 | 0 | 0 | 0 |
| Cenpa         | 1 | 0 | 0 | 0 |
| Dpysl5        | 1 | 0 | 0 | 0 |
| Tmem214       | 5 | 0 | 0 | 0 |
| Agbl5         | 2 | 0 | 0 | 0 |
| Emilin1       | 3 | 0 | 0 | 0 |
| Khk           | 2 | 0 | 0 | 0 |
| 0610007C21Rik | 1 | 0 | 0 | 0 |
| Cad           | 6 | 0 | 0 | 0 |
| Snx17         | 6 | 0 | 0 | 0 |
| Nrbp1         | 8 | 0 | 0 | 0 |
| Zfp512        | 6 | 0 | 0 | 0 |
| Gpn1          | 4 | 0 | 0 | 0 |
| Slc4a1ap      | 4 | 0 | 0 | 0 |
| Mrpl33        | 1 | 0 | 0 | 0 |
| Bre           | 5 | 0 | 0 | 0 |
| Ppp1cb        | 4 | 0 | 0 | 0 |
| Gm2420        | 1 | 0 | 0 | 0 |
| XLOC_025181   | 3 | 0 | 0 | 0 |
| Ywhah         | 7 | 0 | 0 | 0 |
| Maea          | 2 | 0 | 0 | 0 |
| 4933407H18Rik | 5 | 0 | 0 | 0 |
| Tacc3         | 2 | 0 | 0 | 0 |
| Fgfr3         | 5 | 0 | 0 | 0 |
| Whsc1         | 8 | 0 | 0 | 0 |
| Gm1673        | 3 | 0 | 0 | 0 |
| Nat8l         | 5 | 0 | 0 | 0 |
| Rnf4          | 3 | 0 | 0 | 0 |
| Add1          | 9 | 0 | 0 | 0 |
| Grk4          | 6 | 0 | 0 | 0 |
| Rgs12         | 4 | 0 | 0 | 0 |
| Dok7          | 6 | 0 | 0 | 0 |
| XLOC_025200   | 6 | 0 | 0 | 0 |
| Adra2c        | 1 | 0 | 0 | 0 |
| XLOC_025201   | 2 | 0 | 0 | 0 |
| Hmx1          | 2 | 0 | 0 | 0 |
| Acox3         | 6 | 0 | 0 | 0 |
| Ablim2        | 4 | 0 | 0 | 0 |
| Afap1         | 7 | 0 | 0 | 0 |
| Grpel1        | 1 | 0 | 0 | 0 |
| Ccdc96        | 1 | 0 | 0 | 0 |
| Crmp1         | 4 | 0 | 0 | 0 |
| Evc2          | 8 | 0 | 0 | 0 |
| XLOC_025216   | 2 | 0 | 0 | 0 |

|               |    |   |   |   |
|---------------|----|---|---|---|
| XLOC_025217   | 1  | 0 | 0 | 0 |
| Stx18         | 1  | 0 | 0 | 0 |
| Lyar          | 6  | 0 | 0 | 0 |
| Tmem128       | 1  | 0 | 0 | 0 |
| Otop1         | 1  | 0 | 0 | 0 |
| Gm7816        | 1  | 0 | 0 | 0 |
| Cpeb2         | 4  | 0 | 0 | 0 |
| C1qtnf7       | 4  | 0 | 0 | 0 |
| Cc2d2a        | 7  | 0 | 0 | 0 |
| Cd38          | 4  | 0 | 0 | 0 |
| Clrn2         | 1  | 0 | 0 | 0 |
| Lap3          | 3  | 0 | 0 | 0 |
| XLOC_025238   | 3  | 0 | 0 | 0 |
| Med28         | 2  | 0 | 0 | 0 |
| Slit2         | 11 | 0 | 0 | 0 |
| Pacrgl        | 2  | 0 | 0 | 0 |
| Gm5555        | 1  | 0 | 0 | 0 |
| 9230114K14Rik | 5  | 0 | 0 | 0 |
| Sod3          | 1  | 0 | 0 | 0 |
| Pi4k2b        | 3  | 0 | 0 | 0 |
| Zcchc4        | 4  | 0 | 0 | 0 |
| XLOC_025248   | 2  | 0 | 0 | 0 |
| XLOC_025250   | 8  | 0 | 0 | 0 |
| 1810013D10Rik | 1  | 0 | 0 | 0 |
| Tbc1d19       | 6  | 0 | 0 | 0 |
| Stim2         | 3  | 0 | 0 | 0 |
| XLOC_025255   | 2  | 0 | 0 | 0 |
| Gm15975       | 1  | 0 | 0 | 0 |
| Cbfa2t2-ps1   | 1  | 0 | 0 | 0 |
| G6pd2         | 1  | 0 | 0 | 0 |
| 3110047P20Rik | 2  | 0 | 0 | 0 |
| 0610040J01Rik | 2  | 0 | 0 | 0 |
| mKIAA1108     | 1  | 0 | 0 | 0 |
| Tbc1d1        | 7  | 0 | 0 | 0 |
| Klf3          | 3  | 0 | 0 | 0 |
| Fam114a1      | 1  | 0 | 0 | 0 |
| Klhl5         | 8  | 0 | 0 | 0 |
| Lias          | 2  | 0 | 0 | 0 |
| Ube2k         | 4  | 0 | 0 | 0 |
| N4bp2         | 3  | 0 | 0 | 0 |
| Uchl1         | 6  | 0 | 0 | 0 |
| Limch1        | 7  | 0 | 0 | 0 |
| Gm6517        | 1  | 0 | 0 | 0 |
| Slc30a9       | 6  | 0 | 0 | 0 |
| XLOC_025279   | 4  | 0 | 0 | 0 |
| Shisa3        | 1  | 0 | 0 | 0 |
| XLOC_025284   | 4  | 0 | 0 | 0 |

|               |       |   |   |   |
|---------------|-------|---|---|---|
| Guf1          | 3     | 0 | 0 | 0 |
| Gabrb1        | 2     | 0 | 0 | 0 |
| Atp10d        | 11    | 0 | 0 | 0 |
| Slain2        | 2     | 0 | 0 | 0 |
| Slc10a4       | 4     | 0 | 0 | 0 |
| Ociad1        | 2     | 0 | 0 | 0 |
| Cwh43         | 1     | 0 | 0 | 0 |
| Dcun1d4       | 6     | 0 | 0 | 0 |
| 2700023E23Rik | 2     | 0 | 0 | 0 |
| Rasl11b       | 1     | 0 | 0 | 0 |
| Fip1l1        | 2     | 0 | 0 | 0 |
| Kit           | 7     | 0 | 0 | 0 |
| XLOC_025307   | 2     | 0 | 0 | 0 |
| Srd5a3        | 5     | 0 | 0 | 0 |
| XLOC_025308   | 2     | 0 | 0 | 0 |
| Tmem165       | 1     | 0 | 0 | 0 |
| Gm7271        | 3     | 0 | 0 | 0 |
| C530008M17Rik | 10    | 0 | 0 | 0 |
| Paics         | 6     | 0 | 0 | 0 |
| Polr2b        | 2     | 0 | 0 | 0 |
| Lphn3         | 9     | 0 | 0 | 0 |
| Ythdc1        | 7     | 0 | 0 | 0 |
| Smr2          | 1     | 0 | 0 | 0 |
| Rufy3         | 8     | 0 | 0 | 0 |
| Mobkl1a       | 2     | 0 | 0 | 0 |
| Dck           | 1     | 0 | 0 | 0 |
| XLOC_025332   | 2     | 0 | 0 | 0 |
| Pf4           | 1     | 0 | 0 | 0 |
| Mthfd2l       | 8     | 0 | 0 | 0 |
| Thap6         | 1     | 0 | 0 | 0 |
| Uso1          | 4     | 0 | 0 | 0 |
| Art3          | 5     | 0 | 0 | 0 |
|               | 41893 | 4 | 0 | 0 |
| Ccng2         | 1     | 0 | 0 | 0 |
| Mrpl1         | 3     | 0 | 0 | 0 |
| Bmp2k         | 6     | 0 | 0 | 0 |
| Gm5560        | 1     | 0 | 0 | 0 |
| Prdm8         | 5     | 0 | 0 | 0 |
| Fgf5          | 3     | 0 | 0 | 0 |
| Enoph1        | 2     | 0 | 0 | 0 |
| Cops4         | 4     | 0 | 0 | 0 |
| Mrps18c       | 4     | 0 | 0 | 0 |
| Agpat9        | 3     | 0 | 0 | 0 |
| AK020506      | 1     | 0 | 0 | 0 |
| Cds1          | 8     | 0 | 0 | 0 |
| Arhgap24      | 8     | 0 | 0 | 0 |
| Aff1          | 4     | 0 | 0 | 0 |

|               |    |   |   |   |
|---------------|----|---|---|---|
| Nudt9         | 2  | 0 | 0 | 0 |
| Spp1          | 3  | 0 | 0 | 0 |
| Pkd2          | 8  | 0 | 0 | 0 |
| D930016D06Rik | 10 | 0 | 0 | 0 |
| Lrrc8b        | 1  | 0 | 0 | 0 |
| Lrrc8c        | 4  | 0 | 0 | 0 |
| Zfp326        | 3  | 0 | 0 | 0 |
| Cdc7          | 5  | 0 | 0 | 0 |
| Brdt          | 3  | 0 | 0 | 0 |
| Ephx4         | 1  | 0 | 0 | 0 |
| 1700028K03Rik | 1  | 0 | 0 | 0 |
| Rpl5          | 6  | 0 | 0 | 0 |
| Mtf2          | 5  | 0 | 0 | 0 |
| Dr1           | 1  | 0 | 0 | 0 |
| Pigg          | 2  | 0 | 0 | 0 |
| AK141638      | 9  | 0 | 0 | 0 |
| Pcgf3         | 2  | 0 | 0 | 0 |
| Idua          | 6  | 0 | 0 | 0 |
| XLOC_025401   | 2  | 0 | 0 | 0 |
| Fgfr1         | 2  | 0 | 0 | 0 |
| Zfp932        | 4  | 0 | 0 | 0 |
| Zfp605        | 5  | 0 | 0 | 0 |
| Chfr          | 4  | 0 | 0 | 0 |
| Golga3        | 4  | 0 | 0 | 0 |
| Ankle2        | 3  | 0 | 0 | 0 |
| Pole          | 4  | 0 | 0 | 0 |
| Ttc28         | 5  | 0 | 0 | 0 |
| Pitpnb        | 4  | 0 | 0 | 0 |
| Tpst2         | 2  | 0 | 0 | 0 |
| Tfip11        | 3  | 0 | 0 | 0 |
| Hps4          | 3  | 0 | 0 | 0 |
| Wscd2         | 5  | 0 | 0 | 0 |
| Ficd          | 3  | 0 | 0 | 0 |
| Iscu          | 7  | 0 | 0 | 0 |
| Usp30         | 7  | 0 | 0 | 0 |
| Ung           | 2  | 0 | 0 | 0 |
| Ube3b         | 4  | 0 | 0 | 0 |
| Mvk           | 4  | 0 | 0 | 0 |
| BC057022      | 3  | 0 | 0 | 0 |
| Tchp          | 4  | 0 | 0 | 0 |
| Ankrd13a      | 2  | 0 | 0 | 0 |
| Oasl2         | 2  | 0 | 0 | 0 |
| 2210016L21Rik | 1  | 0 | 0 | 0 |
| Srsf9         | 2  | 0 | 0 | 0 |
| Triap1        | 1  | 0 | 0 | 0 |
| Msi1          | 4  | 0 | 0 | 0 |
| Pxn           | 5  | 0 | 0 | 0 |

|               |   |   |   |   |
|---------------|---|---|---|---|
| Rplp0         | 6 | 0 | 0 | 0 |
| Gcn11         | 9 | 0 | 0 | 0 |
| Taok3         | 6 | 0 | 0 | 0 |
| Wsb2          | 6 | 0 | 0 | 0 |
| AK158973      | 1 | 0 | 0 | 0 |
| Nos1          | 2 | 0 | 0 | 0 |
| Fbxo21        | 7 | 0 | 0 | 0 |
| Tesc          | 6 | 0 | 0 | 0 |
| 2410131K14Rik | 1 | 0 | 0 | 0 |
| Med13l        | 5 | 0 | 0 | 0 |
| Tbx3          | 4 | 0 | 0 | 0 |
| Rbm19         | 3 | 0 | 0 | 0 |
| Slc24a6       | 4 | 0 | 0 | 0 |
| Ddx54         | 5 | 0 | 0 | 0 |
| Oas1b         | 3 | 0 | 0 | 0 |
| Naa25         | 2 | 0 | 0 | 0 |
| Brap          | 2 | 0 | 0 | 0 |
| Atxn2         | 7 | 0 | 0 | 0 |
| Fam109a       | 6 | 0 | 0 | 0 |
| Pptc7         | 3 | 0 | 0 | 0 |
| Vps29         | 2 | 0 | 0 | 0 |
| Arpc3         | 2 | 0 | 0 | 0 |
| Anapc7        | 1 | 0 | 0 | 0 |
| XLOC_025488   | 2 | 0 | 0 | 0 |
| P2rx7         | 5 | 0 | 0 | 0 |
| P2rx4         | 3 | 0 | 0 | 0 |
| Rnf34         | 2 | 0 | 0 | 0 |
| Orai1         | 2 | 0 | 0 | 0 |
| Tmem120b      | 1 | 0 | 0 | 0 |
| Psmc9         | 3 | 0 | 0 | 0 |
| XLOC_025500   | 1 | 0 | 0 | 0 |
| Wdr66         | 4 | 0 | 0 | 0 |
| Bcl7a         | 3 | 0 | 0 | 0 |
| XLOC_025501   | 1 | 0 | 0 | 0 |
| Mlxip         | 3 | 0 | 0 | 0 |
| Kntc1         | 4 | 0 | 0 | 0 |
| Denr          | 1 | 0 | 0 | 0 |
| Ogfod2        | 3 | 0 | 0 | 0 |
| Arl6ip4       | 2 | 0 | 0 | 0 |
| 2810006K23Rik | 1 | 0 | 0 | 0 |
| Setd8         | 3 | 0 | 0 | 0 |
| Snrrp35       | 2 | 0 | 0 | 0 |
| Ddx55         | 3 | 0 | 0 | 0 |
| Gtf2h3        | 3 | 0 | 0 | 0 |
| Tctn2         | 4 | 0 | 0 | 0 |
| Atp6v0a2      | 2 | 0 | 0 | 0 |
| Zfp664        | 2 | 0 | 0 | 0 |

|               |    |   |   |   |
|---------------|----|---|---|---|
| Fam101a       | 2  | 0 | 0 | 0 |
| Bri3bp        | 2  | 0 | 0 | 0 |
| Aacs          | 5  | 0 | 0 | 0 |
| XLOC_025525   | 1  | 0 | 0 | 0 |
| XLOC_025526   | 10 | 0 | 0 | 0 |
| Tmem132c      | 1  | 0 | 0 | 0 |
| Glt1d1        | 3  | 0 | 0 | 0 |
| Ran           | 6  | 0 | 0 | 0 |
| Mmp17         | 4  | 0 | 0 | 0 |
| Mrps17        | 5  | 0 | 0 | 0 |
| Gbas          | 2  | 0 | 0 | 0 |
| 4930579G22Rik | 1  | 0 | 0 | 0 |
| Crcp          | 4  | 0 | 0 | 0 |
| Tpst1         | 2  | 0 | 0 | 0 |
| Kctd7         | 1  | 0 | 0 | 0 |
| Rabgef1       | 4  | 0 | 0 | 0 |
| Gm15920       | 1  | 0 | 0 | 0 |
| 0610007L01Rik | 3  | 0 | 0 | 0 |
| Tyw1          | 3  | 0 | 0 | 0 |
| Caln1         | 6  | 0 | 0 | 0 |
| Gatsl2        | 2  | 0 | 0 | 0 |
| Gtf2ird2      | 6  | 0 | 0 | 0 |
| Rfc2          | 2  | 0 | 0 | 0 |
| Wbscr27       | 10 | 0 | 0 | 0 |
| Abhd11        | 5  | 0 | 0 | 0 |
| Stx1a         | 2  | 0 | 0 | 0 |
| Tbl2          | 1  | 0 | 0 | 0 |
| Bcl7b         | 3  | 0 | 0 | 0 |
| Baz1b         | 4  | 0 | 0 | 0 |
| Nsun5         | 5  | 0 | 0 | 0 |
| Rhbdd2        | 3  | 0 | 0 | 0 |
| Por           | 6  | 0 | 0 | 0 |
| Mdh2          | 3  | 0 | 0 | 0 |
| Zp3           | 2  | 0 | 0 | 0 |
| Dtx2          | 4  | 0 | 0 | 0 |
| Polr2j        | 1  | 0 | 0 | 0 |
| Alkbh4        | 4  | 0 | 0 | 0 |
| Rab15         | 2  | 0 | 0 | 0 |
| Fis1          | 4  | 0 | 0 | 0 |
| Cldn15        | 4  | 0 | 0 | 0 |
| Plod3         | 5  | 0 | 0 | 0 |
| Ache          | 5  | 0 | 0 | 0 |
| Ephb4         | 3  | 0 | 0 | 0 |
| Gigyf1        | 5  | 0 | 0 | 0 |
| Actl6b        | 5  | 0 | 0 | 0 |
| Trfr2         | 6  | 0 | 0 | 0 |
| Lrch4         | 5  | 0 | 0 | 0 |

|               |    |   |   |   |
|---------------|----|---|---|---|
| Tsc22d4       | 3  | 0 | 0 | 0 |
| 2010007H12Rik | 3  | 0 | 0 | 0 |
| Zcwpw1        | 1  | 0 | 0 | 0 |
| Azgp1         | 1  | 0 | 0 | 0 |
| Zkscan1       | 2  | 0 | 0 | 0 |
| Zscan21       | 2  | 0 | 0 | 0 |
| Cops6         | 2  | 0 | 0 | 0 |
| Ap4m1         | 2  | 0 | 0 | 0 |
| Cnpy4         | 2  | 0 | 0 | 0 |
| 0910001L09Rik | 4  | 0 | 0 | 0 |
| Stag3         | 3  | 0 | 0 | 0 |
| Zfp157        | 5  | 0 | 0 | 0 |
| A430033K04Rik | 1  | 0 | 0 | 0 |
| Heatr2        | 2  | 0 | 0 | 0 |
| Sun1          | 10 | 0 | 0 | 0 |
| Get4          | 1  | 0 | 0 | 0 |
| Gpr146        | 1  | 0 | 0 | 0 |
| Gpr30         | 3  | 0 | 0 | 0 |
| Mafk          | 2  | 0 | 0 | 0 |
| XLOC_025613   | 2  | 0 | 0 | 0 |
| Elfn1         | 2  | 0 | 0 | 0 |
| Nudt1         | 3  | 0 | 0 | 0 |
| XLOC_025616   | 5  | 0 | 0 | 0 |
| Chst12        | 5  | 0 | 0 | 0 |
| XLOC_025618   | 1  | 0 | 0 | 0 |
| Lfng          | 2  | 0 | 0 | 0 |
| AA881470      | 4  | 0 | 0 | 0 |
| Sdk1          | 2  | 0 | 0 | 0 |
| Foxk1         | 1  | 0 | 0 | 0 |
| Wipi2         | 2  | 0 | 0 | 0 |
| Slc29a4       | 5  | 0 | 0 | 0 |
| Fscn1         | 5  | 0 | 0 | 0 |
| Zfp12         | 4  | 0 | 0 | 0 |
| Grid2ip       | 5  | 0 | 0 | 0 |
| Kdelr2        | 1  | 0 | 0 | 0 |
| Daglb         | 2  | 0 | 0 | 0 |
| 2810453I06Rik | 1  | 0 | 0 | 0 |
| Cyth3         | 3  | 0 | 0 | 0 |
| D130017N08Rik | 1  | 0 | 0 | 0 |
| Eif2ak1       | 1  | 0 | 0 | 0 |
| Rsph10b2      | 11 | 0 | 0 | 0 |
| Lmtk2         | 4  | 0 | 0 | 0 |
| Bri3          | 2  | 0 | 0 | 0 |
| Nptx2         | 2  | 0 | 0 | 0 |
| Arpc1a        | 1  | 0 | 0 | 0 |
| Arpc1b        | 4  | 0 | 0 | 0 |
| Cpsf4         | 3  | 0 | 0 | 0 |

|               |    |   |   |   |
|---------------|----|---|---|---|
| Zkscan5       | 3  | 0 | 0 | 0 |
| Zfp655        | 2  | 0 | 0 | 0 |
| Zfp498        | 4  | 0 | 0 | 0 |
| Cdk8          | 12 | 0 | 0 | 0 |
| Wasf3         | 4  | 0 | 0 | 0 |
| XLOC_025657   | 1  | 0 | 0 | 0 |
| Rasl11a       | 1  | 0 | 0 | 0 |
| Gtf3a         | 1  | 0 | 0 | 0 |
| Polr1d        | 4  | 0 | 0 | 0 |
| Pan3          | 9  | 0 | 0 | 0 |
| Pomp          | 4  | 0 | 0 | 0 |
| Mtus2         | 5  | 0 | 0 | 0 |
| AK087624      | 1  | 0 | 0 | 0 |
| Uspl1         | 5  | 0 | 0 | 0 |
| Alox5ap       | 7  | 0 | 0 | 0 |
| AK138849      | 5  | 0 | 0 | 0 |
| 6330406I15Rik | 4  | 0 | 0 | 0 |
| B3galtl       | 4  | 0 | 0 | 0 |
| Fry           | 13 | 0 | 0 | 0 |
| Brca2         | 6  | 0 | 0 | 0 |
| Pds5b         | 4  | 0 | 0 | 0 |
| Kl            | 2  | 0 | 0 | 0 |
| Gatad1        | 1  | 0 | 0 | 0 |
| Ankib1        | 2  | 0 | 0 | 0 |
| Mterf         | 3  | 0 | 0 | 0 |
| Cyp51         | 3  | 0 | 0 | 0 |
| Cdk14         | 9  | 0 | 0 | 0 |
| Cldn12        | 2  | 0 | 0 | 0 |
| Gtpbp10       | 2  | 0 | 0 | 0 |
| Steap2        | 6  | 0 | 0 | 0 |
| Steap1        | 1  | 0 | 0 | 0 |
| Dbf4          | 1  | 0 | 0 | 0 |
| Rundc3b       | 4  | 0 | 0 | 0 |
| Crot          | 5  | 0 | 0 | 0 |
| Dmtf1         | 7  | 0 | 0 | 0 |
| Grm3          | 1  | 0 | 0 | 0 |
| Gm5152        | 2  | 0 | 0 | 0 |
| Speer4c       | 2  | 0 | 0 | 0 |
| Gm3510        | 2  | 0 | 0 | 0 |
| Cd36          | 7  | 0 | 0 | 0 |
| Gnai1         | 4  | 0 | 0 | 0 |
| Phtf2         | 5  | 0 | 0 | 0 |
| Rsbn1l        | 5  | 0 | 0 | 0 |
| Ptpn12        | 5  | 0 | 0 | 0 |
| Napepld       | 3  | 0 | 0 | 0 |
| Dnajc2        | 1  | 0 | 0 | 0 |
| Reln          | 2  | 0 | 0 | 0 |



|                    |    |   |   |   |
|--------------------|----|---|---|---|
| AK017143           | 2  | 0 | 0 | 0 |
| Srpk2              | 4  | 0 | 0 | 0 |
| ENSMUSG00000073777 | 1  | 0 | 0 | 0 |
| Tomm7              | 1  | 0 | 0 | 0 |
| Fam126a            | 6  | 0 | 0 | 0 |
| XLOC_025735        | 4  | 0 | 0 | 0 |
| Kcnh2              | 5  | 0 | 0 | 0 |
| Cdk5               | 2  | 0 | 0 | 0 |
| Tmub1              | 4  | 0 | 0 | 0 |
| Gbx1               | 4  | 0 | 0 | 0 |
| Rheb               | 2  | 0 | 0 | 0 |
| Prkag2             | 9  | 0 | 0 | 0 |
| Paxip1             | 8  | 0 | 0 | 0 |
| Shh                | 1  | 0 | 0 | 0 |
| Lmbr1              | 3  | 0 | 0 | 0 |
| Tyms               | 5  | 0 | 0 | 0 |
| Hadha              | 5  | 0 | 0 | 0 |
| Gm16288            | 1  | 0 | 0 | 0 |
| Ost4               | 3  | 0 | 0 | 0 |
| Cgref1             | 1  | 0 | 0 | 0 |
| Preb               | 2  | 0 | 0 | 0 |
| Slc5a6             | 6  | 0 | 0 | 0 |
| Gtf3c2             | 11 | 0 | 0 | 0 |
| Eif2b4             | 2  | 0 | 0 | 0 |
| Ppm1g              | 8  | 0 | 0 | 0 |
| Ift172             | 8  | 0 | 0 | 0 |
| Fndc4              | 3  | 0 | 0 | 0 |
| Supt7l             | 2  | 0 | 0 | 0 |
| AK036733           | 3  | 0 | 0 | 0 |
| XLOC_025779        | 1  | 0 | 0 | 0 |
| Pisd               | 7  | 0 | 0 | 0 |
| C330019G07Rik      | 5  | 0 | 0 | 0 |
| Ctbp1              | 7  | 0 | 0 | 0 |
| Slbp               | 2  | 0 | 0 | 0 |
| Tmem129            | 3  | 0 | 0 | 0 |
| Letm1              | 5  | 0 | 0 | 0 |
| Whsc2              | 3  | 0 | 0 | 0 |
| Mxd4               | 3  | 0 | 0 | 0 |
| Zfyve28            | 6  | 0 | 0 | 0 |
| Tnip2              | 5  | 0 | 0 | 0 |
| Mfsd10             | 5  | 0 | 0 | 0 |
| Nop14              | 1  | 0 | 0 | 0 |
| Lrpap1             | 1  | 0 | 0 | 0 |
| 2310079F23Rik      | 5  | 0 | 0 | 0 |
| Sh3tc1             | 6  | 0 | 0 | 0 |
| Sorcs2             | 5  | 0 | 0 | 0 |
| AK144870           | 4  | 0 | 0 | 0 |

|               |    |   |   |   |
|---------------|----|---|---|---|
| AK043305      | 1  | 0 | 0 | 0 |
| Tada2b        | 1  | 0 | 0 | 0 |
| Tbc1d14       | 4  | 0 | 0 | 0 |
| D5Erttd579e   | 3  | 0 | 0 | 0 |
| XLOC_025812   | 2  | 0 | 0 | 0 |
| Mrfp1         | 2  | 0 | 0 | 0 |
| Man2b2        | 2  | 0 | 0 | 0 |
| Wfs1          | 3  | 0 | 0 | 0 |
| Nsg1          | 3  | 0 | 0 | 0 |
| Slc2a9        | 5  | 0 | 0 | 0 |
| Wdr1          | 6  | 0 | 0 | 0 |
| Zfp518b       | 6  | 0 | 0 | 0 |
| Hs3st1        | 2  | 0 | 0 | 0 |
| XLOC_025828   | 3  | 0 | 0 | 0 |
| Rab28         | 5  | 0 | 0 | 0 |
| Fbxl5         | 1  | 0 | 0 | 0 |
| Tapt1         | 3  | 0 | 0 | 0 |
| Ldb2          | 5  | 0 | 0 | 0 |
| Qdpr          | 5  | 0 | 0 | 0 |
| Lcorl         | 6  | 0 | 0 | 0 |
| Kcnp4         | 6  | 0 | 0 | 0 |
| Gpr125        | 7  | 0 | 0 | 0 |
| Ppargc1a      | 2  | 0 | 0 | 0 |
| Dhx15         | 1  | 0 | 0 | 0 |
| Lgi2          | 3  | 0 | 0 | 0 |
| Sepsecs       | 6  | 0 | 0 | 0 |
| Sel1l3        | 6  | 0 | 0 | 0 |
| Cckar         | 6  | 0 | 0 | 0 |
| XLOC_025855   | 1  | 0 | 0 | 0 |
| Rell1         | 2  | 0 | 0 | 0 |
| Rfc1          | 9  | 0 | 0 | 0 |
| Ugdh          | 5  | 0 | 0 | 0 |
| 1110003E01Rik | 3  | 0 | 0 | 0 |
| Pds5a         | 6  | 0 | 0 | 0 |
| Bend4         | 5  | 0 | 0 | 0 |
| Atp8a1        | 7  | 0 | 0 | 0 |
| Gnpda2        | 5  | 0 | 0 | 0 |
| Gabrg1        | 4  | 0 | 0 | 0 |
| Gabra2        | 8  | 0 | 0 | 0 |
| Gabra4        | 4  | 0 | 0 | 0 |
| Commdb        | 4  | 0 | 0 | 0 |
| Corin         | 2  | 0 | 0 | 0 |
| Nfxl1         | 5  | 0 | 0 | 0 |
| Fryl          | 10 | 0 | 0 | 0 |
| Ociad2        | 1  | 0 | 0 | 0 |
| Sgcb          | 2  | 0 | 0 | 0 |
| Usp46         | 2  | 0 | 0 | 0 |

|               |   |   |   |   |
|---------------|---|---|---|---|
| Scfd2         | 2 | 0 | 0 | 0 |
| Chic2         | 1 | 0 | 0 | 0 |
| Kdr           | 3 | 0 | 0 | 0 |
| Nmu           | 2 | 0 | 0 | 0 |
| AASDH         | 5 | 0 | 0 | 0 |
| Ppat          | 1 | 0 | 0 | 0 |
| Hopx          | 3 | 0 | 0 | 0 |
| Spink2        | 3 | 0 | 0 | 0 |
| 2610024G14Rik | 1 | 0 | 0 | 0 |
| Gm2199        | 1 | 0 | 0 | 0 |
| Cenpc1        | 7 | 0 | 0 | 0 |
| Uba6          | 4 | 0 | 0 | 0 |
| Tmprss11c     | 4 | 0 | 0 | 0 |
| Igj           | 4 | 0 | 0 | 0 |
| Grsf1         | 4 | 0 | 0 | 0 |
| Gc            | 2 | 0 | 0 | 0 |
| Adamts3       | 4 | 0 | 0 | 0 |
| Cox18         | 4 | 0 | 0 | 0 |
| Ankrd17       | 6 | 0 | 0 | 0 |
| XLOC_025917   | 2 | 0 | 0 | 0 |
| Rassf6        | 6 | 0 | 0 | 0 |
| Rchy1         | 3 | 0 | 0 | 0 |
| Cdkl2         | 7 | 0 | 0 | 0 |
| G3bp2         | 7 | 0 | 0 | 0 |
| Naaa          | 1 | 0 | 0 | 0 |
| Sdad1         | 2 | 0 | 0 | 0 |
| Cxcl9         | 1 | 0 | 0 | 0 |
| Cxcl10        | 2 | 0 | 0 | 0 |
| Nup54         | 9 | 0 | 0 | 0 |
| Scarb2        | 4 | 0 | 0 | 0 |
| Ankrd56       | 1 | 0 | 0 | 0 |
| Cnot6l        | 3 | 0 | 0 | 0 |
| Paqr3         | 3 | 0 | 0 | 0 |
| Antxr2        | 8 | 0 | 0 | 0 |
| Tmem150c      | 4 | 0 | 0 | 0 |
| Sec31a        | 7 | 0 | 0 | 0 |
| 5430416N02Rik | 2 | 0 | 0 | 0 |
| Lin54         | 8 | 0 | 0 | 0 |
| Plac8         | 1 | 0 | 0 | 0 |
| Coq2          | 8 | 0 | 0 | 0 |
| Fam175a       | 1 | 0 | 0 | 0 |
| Nkx6-1        | 2 | 0 | 0 | 0 |
| Mapk10        | 9 | 0 | 0 | 0 |
| Slc10a6       | 1 | 0 | 0 | 0 |
| Klhl8         | 5 | 0 | 0 | 0 |
| Hsd17b11      | 4 | 0 | 0 | 0 |
| Sparcl1       | 4 | 0 | 0 | 0 |

|               |    |   |   |   |
|---------------|----|---|---|---|
| Zfp951        | 6  | 0 | 0 | 0 |
| Gbp9          | 3  | 0 | 0 | 0 |
| Gbp4          | 6  | 0 | 0 | 0 |
| AK138287      | 3  | 0 | 0 | 0 |
| AK087483      | 1  | 0 | 0 | 0 |
| Zfp644        | 11 | 0 | 0 | 0 |
| Tgfbr3        | 3  | 0 | 0 | 0 |
| Gm9727        | 1  | 0 | 0 | 0 |
| Glmn          | 1  | 0 | 0 | 0 |
| Evi5          | 11 | 0 | 0 | 0 |
| Fam69a        | 2  | 0 | 0 | 0 |
| Tmed5         | 1  | 0 | 0 | 0 |
| Atp5k         | 2  | 0 | 0 | 0 |
| Mfsd7a        | 8  | 0 | 0 | 0 |
| Cplx1         | 4  | 0 | 0 | 0 |
| Gak           | 7  | 0 | 0 | 0 |
| Dgkq          | 3  | 0 | 0 | 0 |
| Crif2         | 9  | 0 | 0 | 0 |
| XLOC_025991   | 3  | 0 | 0 | 0 |
| 5430403G16Rik | 1  | 0 | 0 | 0 |
| Gtpbp6        | 11 | 0 | 0 | 0 |
| Pgam5         | 4  | 0 | 0 | 0 |
| P2rx2         | 4  | 0 | 0 | 0 |
| Noc4l         | 1  | 0 | 0 | 0 |
| Pus1          | 3  | 0 | 0 | 0 |
| Ulk1          | 6  | 0 | 0 | 0 |
| Hscb          | 3  | 0 | 0 | 0 |
| Miat          | 16 | 0 | 0 | 0 |
| Asphd2        | 7  | 0 | 0 | 0 |
| Sez6l         | 8  | 0 | 0 | 0 |
| Adrbk2        | 5  | 0 | 0 | 0 |
| Crybb3        | 5  | 0 | 0 | 0 |
| 2900026A02Rik | 6  | 0 | 0 | 0 |
| Sgsm1         | 4  | 0 | 0 | 0 |
| Sart3         | 7  | 0 | 0 | 0 |
| Coro1c        | 4  | 0 | 0 | 0 |
| Ssh1          | 4  | 0 | 0 | 0 |
| Svop          | 5  | 0 | 0 | 0 |
| Kctd10        | 4  | 0 | 0 | 0 |
| Mmab          | 4  | 0 | 0 | 0 |
| Trpv4         | 6  | 0 | 0 | 0 |
| Gltf          | 1  | 0 | 0 | 0 |
| Git2          | 9  | 0 | 0 | 0 |
| 2610524H06Rik | 3  | 0 | 0 | 0 |
| Acads         | 1  | 0 | 0 | 0 |
| Unc119b       | 2  | 0 | 0 | 0 |
| Mlec          | 4  | 0 | 0 | 0 |

|               |    |   |   |   |
|---------------|----|---|---|---|
| Cabp1         | 7  | 0 | 0 | 0 |
| Rnf10         | 6  | 0 | 0 | 0 |
| Dynll1        | 2  | 0 | 0 | 0 |
| Gatc          | 2  | 0 | 0 | 0 |
| Cox6a1        | 1  | 0 | 0 | 0 |
| Sirt4         | 7  | 0 | 0 | 0 |
| Ccdc64        | 6  | 0 | 0 | 0 |
| Prkab1        | 6  | 0 | 0 | 0 |
| Tmem233       | 6  | 0 | 0 | 0 |
| Hspb8         | 5  | 0 | 0 | 0 |
| Srrm4         | 6  | 0 | 0 | 0 |
| Suds3         | 3  | 0 | 0 | 0 |
| Pebp1         | 4  | 0 | 0 | 0 |
| Fbxw8         | 4  | 0 | 0 | 0 |
| Rnft2         | 7  | 0 | 0 | 0 |
| Gm16065       | 2  | 0 | 0 | 0 |
| Sdsl          | 6  | 0 | 0 | 0 |
| Plbd2         | 2  | 0 | 0 | 0 |
| Tpcn1         | 4  | 0 | 0 | 0 |
| Oas2          | 7  | 0 | 0 | 0 |
| Oas1c         | 8  | 0 | 0 | 0 |
| Oas1a         | 1  | 0 | 0 | 0 |
| Rph3a         | 10 | 0 | 0 | 0 |
| Ptpn11        | 4  | 0 | 0 | 0 |
| Erp29         | 3  | 0 | 0 | 0 |
| Mapkapk5      | 7  | 0 | 0 | 0 |
| Aldh2         | 3  | 0 | 0 | 0 |
| Tctn1         | 3  | 0 | 0 | 0 |
| 1500011H22Rik | 2  | 0 | 0 | 0 |
| Atp2a2        | 5  | 0 | 0 | 0 |
| Camkk2        | 3  | 0 | 0 | 0 |
| Anapc5        | 10 | 0 | 0 | 0 |
| Morn3         | 2  | 0 | 0 | 0 |
| Rhof          | 2  | 0 | 0 | 0 |
| Diablo        | 4  | 0 | 0 | 0 |
| Vps33a        | 7  | 0 | 0 | 0 |
| Clip1         | 8  | 0 | 0 | 0 |
| Zcchc8        | 7  | 0 | 0 | 0 |
| Rsrc2         | 3  | 0 | 0 | 0 |
| Vps37b        | 1  | 0 | 0 | 0 |
| Abcb9         | 5  | 0 | 0 | 0 |
| Pitpm2        | 8  | 0 | 0 | 0 |
| Mphosph9      | 8  | 0 | 0 | 0 |
| Cdk2ap1       | 3  | 0 | 0 | 0 |
| Sbno1         | 4  | 0 | 0 | 0 |
| Rilpl2        | 1  | 0 | 0 | 0 |
| Rilpl1        | 2  | 0 | 0 | 0 |

|               |    |   |   |   |
|---------------|----|---|---|---|
| Eif2b1        | 2  | 0 | 0 | 0 |
| Ccdc92        | 9  | 0 | 0 | 0 |
| Scarb1        | 3  | 0 | 0 | 0 |
| Ubc           | 1  | 0 | 0 | 0 |
| Dhx37         | 4  | 0 | 0 | 0 |
| Slc15a4       | 9  | 0 | 0 | 0 |
| Tmem132d      | 3  | 0 | 0 | 0 |
| 5930412G12Rik | 6  | 0 | 0 | 0 |
| Rimbp2        | 10 | 0 | 0 | 0 |
| Stx2          | 4  | 0 | 0 | 0 |
| Zfp11         | 1  | 0 | 0 | 0 |
| Chchd2        | 7  | 0 | 0 | 0 |
| Gusb          | 2  | 0 | 0 | 0 |
| Asl           | 3  | 0 | 0 | 0 |
| Sbds          | 3  | 0 | 0 | 0 |
| Wbscr17       | 8  | 0 | 0 | 0 |
| XLOC_026147   | 2  | 0 | 0 | 0 |
| Auts2         | 15 | 0 | 0 | 0 |
| Wbscr16       | 4  | 0 | 0 | 0 |
| Ncf1          | 4  | 0 | 0 | 0 |
| Gtf2i         | 9  | 0 | 0 | 0 |
| Gtf2ird1      | 9  | 0 | 0 | 0 |
| Clip2         | 9  | 0 | 0 | 0 |
| Eif4h         | 4  | 0 | 0 | 0 |
| Vps37d        | 3  | 0 | 0 | 0 |
| Fzd9          | 1  | 0 | 0 | 0 |
| Pom121        | 2  | 0 | 0 | 0 |
| Hip1          | 7  | 0 | 0 | 0 |
| Tmem120a      | 2  | 0 | 0 | 0 |
| Styxl1        | 1  | 0 | 0 | 0 |
| Ywhag         | 4  | 0 | 0 | 0 |
| Lrwd1         | 2  | 0 | 0 | 0 |
| Orai2         | 4  | 0 | 0 | 0 |
| Prkrip1       | 2  | 0 | 0 | 0 |
| Cux1          | 5  | 0 | 0 | 0 |
| Emid2         | 5  | 0 | 0 | 0 |
| Znhit1        | 4  | 0 | 0 | 0 |
| Ap1s1         | 3  | 0 | 0 | 0 |
| Trim56        | 3  | 0 | 0 | 0 |
| Srrt          | 4  | 0 | 0 | 0 |
| Slc12a9       | 3  | 0 | 0 | 0 |
| Pop7          | 1  | 0 | 0 | 0 |
| Gnb2          | 6  | 0 | 0 | 0 |
| Mospd3        | 3  | 0 | 0 | 0 |
| Pcolce        | 2  | 0 | 0 | 0 |
| Irs3          | 1  | 0 | 0 | 0 |
| Agfg2         | 5  | 0 | 0 | 0 |

|               |   |   |   |   |
|---------------|---|---|---|---|
| 6430598A04Rik | 4 | 0 | 0 | 0 |
| Mepce         | 4 | 0 | 0 | 0 |
| Pilra         | 2 | 0 | 0 | 0 |
| Pilrb2        | 3 | 0 | 0 | 0 |
| Cyp3a13       | 5 | 0 | 0 | 0 |
| Gjc3          | 3 | 0 | 0 | 0 |
| Taf6          | 5 | 0 | 0 | 0 |
| BC037034      | 6 | 0 | 0 | 0 |
| Zfp68         | 2 | 0 | 0 | 0 |
| Pdgfa         | 7 | 0 | 0 | 0 |
| Prkar1b       | 6 | 0 | 0 | 0 |
| Adap1         | 4 | 0 | 0 | 0 |
| Cox19         | 3 | 0 | 0 | 0 |
| 3110082I17Rik | 2 | 0 | 0 | 0 |
| Zfand2a       | 4 | 0 | 0 | 0 |
| Ints1         | 7 | 0 | 0 | 0 |
| Psmg3         | 2 | 0 | 0 | 0 |
| Ftsj2         | 2 | 0 | 0 | 0 |
| Snx8          | 4 | 0 | 0 | 0 |
| Ttyh3         | 5 | 0 | 0 | 0 |
| lqce          | 4 | 0 | 0 | 0 |
| Gna12         | 2 | 0 | 0 | 0 |
| Card11        | 8 | 0 | 0 | 0 |
| Radil         | 2 | 0 | 0 | 0 |
| Tnrc18        | 8 | 0 | 0 | 0 |
| Fbxl18        | 7 | 0 | 0 | 0 |
| Actb          | 2 | 0 | 0 | 0 |
| Rnf216        | 8 | 0 | 0 | 0 |
| Rbak          | 7 | 0 | 0 | 0 |
| E130309D02Rik | 2 | 0 | 0 | 0 |
| Zdhhc4        | 8 | 0 | 0 | 0 |
| Rac1          | 6 | 0 | 0 | 0 |
| Usp42         | 2 | 0 | 0 | 0 |
| Aimp2         | 2 | 0 | 0 | 0 |
| Tecpr1        | 5 | 0 | 0 | 0 |
| Tmem130       | 5 | 0 | 0 | 0 |
| Smurf1        | 5 | 0 | 0 | 0 |
| Pdap1         | 2 | 0 | 0 | 0 |
| Atp5j2        | 3 | 0 | 0 | 0 |
| Zkscan14      | 4 | 0 | 0 | 0 |
| Rnf6          | 4 | 0 | 0 | 0 |
| Usp12         | 6 | 0 | 0 | 0 |
| Mtif3         | 2 | 0 | 0 | 0 |
| XLOC_026263   | 4 | 0 | 0 | 0 |
| Lnx2          | 3 | 0 | 0 | 0 |
| Flt3          | 1 | 0 | 0 | 0 |
| Flt1          | 6 | 0 | 0 | 0 |

|               |    |   |   |   |
|---------------|----|---|---|---|
| Slc7a1        | 3  | 0 | 0 | 0 |
| Ubl3          | 5  | 0 | 0 | 0 |
| Katnal1       | 7  | 0 | 0 | 0 |
| AK079377      | 1  | 0 | 0 | 0 |
| AK007907      | 1  | 0 | 0 | 0 |
| AK036974      | 1  | 0 | 0 | 0 |
| Hmgb1         | 1  | 0 | 0 | 0 |
| Hsph1         | 4  | 0 | 0 | 0 |
| Gm5           | 2  | 0 | 0 | 0 |
| N4bp2l2       | 6  | 0 | 0 | 0 |
| Stard13       | 8  | 0 | 0 | 0 |
| Rfc3          | 2  | 0 | 0 | 0 |
| Pex1          | 1  | 0 | 0 | 0 |
| Abcb4         | 1  | 0 | 0 | 0 |
| XLOC_025099   | 4  | 0 | 0 | 0 |
| XLOC_025101   | 4  | 0 | 0 | 0 |
| Nos3          | 1  | 0 | 0 | 0 |
| Slc4a2        | 4  | 0 | 0 | 0 |
| 1700096K18Rik | 1  | 0 | 0 | 0 |
| 9530036O11Rik | 7  | 0 | 0 | 0 |
| XLOC_025191   | 10 | 0 | 0 | 0 |
| Fam193a       | 3  | 0 | 0 | 0 |
| Htt           | 3  | 0 | 0 | 0 |
| A930005I04Rik | 1  | 0 | 0 | 0 |
| XLOC_025197   | 2  | 0 | 0 | 0 |
| Cyt11         | 1  | 0 | 0 | 0 |
| Rbpj          | 1  | 0 | 0 | 0 |
| Pcdh7         | 5  | 0 | 0 | 0 |
| XLOC_025269   | 2  | 0 | 0 | 0 |
| Nsun7         | 5  | 0 | 0 | 0 |
| XLOC_025280   | 2  | 0 | 0 | 0 |
| AK035785      | 1  | 0 | 0 | 0 |
| XLOC_025310   | 1  | 0 | 0 | 0 |
| Exoc1         | 5  | 0 | 0 | 0 |
| Cep135        | 9  | 0 | 0 | 0 |
| Slc4a4        | 3  | 0 | 0 | 0 |
| 1700007G11Rik | 4  | 0 | 0 | 0 |
| 4930524J08Rik | 1  | 0 | 0 | 0 |
| Lrrc8d        | 8  | 0 | 0 | 0 |
| AK085824      | 1  | 0 | 0 | 0 |
| XLOC_025384   | 1  | 0 | 0 | 0 |
| A830010M20Rik | 2  | 0 | 0 | 0 |
| Rpap2         | 2  | 0 | 0 | 0 |
| Gm3511        | 1  | 0 | 0 | 0 |
| Pop5          | 4  | 0 | 0 | 0 |
| Coq5          | 1  | 0 | 0 | 0 |
| XLOC_025452   | 1  | 0 | 0 | 0 |



|               |   |   |   |   |
|---------------|---|---|---|---|
| B230112J18Rik | 1 | 0 | 0 | 0 |
| XLOC_025455   | 1 | 0 | 0 | 0 |
| Myl2          | 2 | 0 | 0 | 0 |
| Ppp1cc        | 2 | 0 | 0 | 0 |
| AK079939      | 2 | 0 | 0 | 0 |
| XLOC_025494   | 2 | 0 | 0 | 0 |
| XLOC_025495   | 1 | 0 | 0 | 0 |
| Setd1b        | 4 | 0 | 0 | 0 |
| mKIAA1076     | 3 | 0 | 0 | 0 |
| Dnahc10       | 9 | 0 | 0 | 0 |
| Sfswap        | 1 | 0 | 0 | 0 |
| Srsf8         | 6 | 0 | 0 | 0 |
| Vkorc1l1      | 2 | 0 | 0 | 0 |
| XLOC_025573   | 1 | 0 | 0 | 0 |
| AK134703      | 1 | 0 | 0 | 0 |
| C330006K01Rik | 3 | 0 | 0 | 0 |
| 0610040B10Rik | 2 | 0 | 0 | 0 |
| Rpl21         | 1 | 0 | 0 | 0 |
| XLOC_025661   | 3 | 0 | 0 | 0 |
| XLOC_025663   | 1 | 0 | 0 | 0 |
| AK009869      | 4 | 0 | 0 | 0 |
| XLOC_025673   | 1 | 0 | 0 | 0 |
| XLOC_025674   | 2 | 0 | 0 | 0 |
| Adam22        | 3 | 0 | 0 | 0 |
| AK046351      | 5 | 0 | 0 | 0 |
| Fbxl13        | 1 | 0 | 0 | 0 |
| A930003O13Rik | 3 | 0 | 0 | 0 |
| Pus7          | 4 | 0 | 0 | 0 |
| Rbks          | 1 | 0 | 0 | 0 |
| Haus3         | 1 | 0 | 0 | 0 |
| Gm7854        | 1 | 0 | 0 | 0 |
| C130083M11Rik | 1 | 0 | 0 | 0 |
| XLOC_025863   | 1 | 0 | 0 | 0 |
| LnX1          | 2 | 0 | 0 | 0 |
| Clock         | 3 | 0 | 0 | 0 |
| Igfbp7        | 2 | 0 | 0 | 0 |
| XLOC_025910   | 1 | 0 | 0 | 0 |
| Ppef2         | 4 | 0 | 0 | 0 |
| Ccni          | 4 | 0 | 0 | 0 |
| Hnrnpd        | 4 | 0 | 0 | 0 |
| Hnrpdl        | 6 | 0 | 0 | 0 |
| Mpa2l         | 5 | 0 | 0 | 0 |
| AK019690      | 1 | 0 | 0 | 0 |
| XLOC_025996   | 1 | 0 | 0 | 0 |
| Pxmp2         | 1 | 0 | 0 | 0 |
| Rfc5          | 3 | 0 | 0 | 0 |
| 1110008J03Rik | 1 | 0 | 0 | 0 |

|               |   |   |   |   |
|---------------|---|---|---|---|
| Sh2b3         | 4 | 0 | 0 | 0 |
| Tect1         | 1 | 0 | 0 | 0 |
| Al480526      | 7 | 0 | 0 | 0 |
| XLOC_026125   | 1 | 0 | 0 | 0 |
| XLOC_026158   | 2 | 0 | 0 | 0 |
| Eln           | 5 | 0 | 0 | 0 |
| Wbscr22       | 1 | 0 | 0 | 0 |
| Srcrb4d       | 1 | 0 | 0 | 0 |
| Sh2b2         | 5 | 0 | 0 | 0 |
| Fbxo24        | 2 | 0 | 0 | 0 |
| Zfp113        | 3 | 0 | 0 | 0 |
| Mcm7          | 2 | 0 | 0 | 0 |
| Mad1l1        | 5 | 0 | 0 | 0 |
| Grifin        | 1 | 0 | 0 | 0 |
| XLOC_026251   | 3 | 0 | 0 | 0 |
| Slc46a3       | 2 | 0 | 0 | 0 |
| Abcb1a        | 1 | 0 | 0 | 0 |
| AK002390      | 1 | 0 | 0 | 0 |
| XLOC_025234   | 1 | 0 | 0 | 0 |
| XLOC_025236   | 1 | 0 | 0 | 0 |
| AK017706      | 2 | 0 | 0 | 0 |
| 3110047P20Rik | 2 | 0 | 0 | 0 |
| XLOC_025285   | 1 | 0 | 0 | 0 |
| XLOC_025294   | 1 | 0 | 0 | 0 |
| XLOC_025296   | 1 | 0 | 0 | 0 |
| Pdgfra        | 6 | 0 | 0 | 0 |
| XLOC_025306   | 2 | 0 | 0 | 0 |
| Rest          | 2 | 0 | 0 | 0 |
| Bmp3          | 1 | 0 | 0 | 0 |
| 2310034O05Rik | 1 | 0 | 0 | 0 |
| Gm8258        | 1 | 0 | 0 | 0 |
| XLOC_025434   | 2 | 0 | 0 | 0 |
| XLOC_025450   | 1 | 0 | 0 | 0 |
| Hvcn1         | 1 | 0 | 0 | 0 |
| Gpn3          | 1 | 0 | 0 | 0 |
| Ccdc62        | 7 | 0 | 0 | 0 |
| XLOC_025532   | 1 | 0 | 0 | 0 |
| Mlxipl        | 1 | 0 | 0 | 0 |
| 4933404O12Rik | 1 | 0 | 0 | 0 |
| XLOC_025595   | 2 | 0 | 0 | 0 |
| Pms2          | 3 | 0 | 0 | 0 |
| AK153727      | 1 | 0 | 0 | 0 |
| XLOC_025653   | 1 | 0 | 0 | 0 |
| XLOC_025706   | 2 | 0 | 0 | 0 |
| Mpv17         | 2 | 0 | 0 | 0 |
| XLOC_025802   | 2 | 0 | 0 | 0 |
| Msx1          | 1 | 0 | 0 | 0 |

|               |   |   |   |   |
|---------------|---|---|---|---|
| Zfp509        | 1 | 0 | 0 | 0 |
| Fgfbp1        | 1 | 0 | 0 | 0 |
| Apbb2         | 5 | 0 | 0 | 0 |
| Gm5868        | 2 | 0 | 0 | 0 |
| Btc           | 1 | 0 | 0 | 0 |
| Cxcl11        | 2 | 0 | 0 | 0 |
| Helq          | 5 | 0 | 0 | 0 |
| AK133807      | 1 | 0 | 0 | 0 |
| AK087393      | 2 | 0 | 0 | 0 |
| Crybb2        | 1 | 0 | 0 | 0 |
| XLOC_026040   | 2 | 0 | 0 | 0 |
| XLOC_026065   | 1 | 0 | 0 | 0 |
| Ccdc63        | 1 | 0 | 0 | 0 |
| Rad9b         | 2 | 0 | 0 | 0 |
| Wbscr25       | 1 | 0 | 0 | 0 |
| Ccl24         | 1 | 0 | 0 | 0 |
| XLOC_026221   | 3 | 0 | 0 | 0 |
| Baiap2l1      | 2 | 0 | 0 | 0 |
| N4bp2l1       | 4 | 0 | 0 | 0 |
| XLOC_025095   | 3 | 0 | 0 | 0 |
| Speer1-ps1    | 1 | 0 | 0 | 0 |
| 4831440E17Rik | 1 | 0 | 0 | 0 |
| XLOC_025202   | 1 | 0 | 0 | 0 |
| Bst1          | 2 | 0 | 0 | 0 |
| XLOC_025277   | 2 | 0 | 0 | 0 |
| Nipal1        | 1 | 0 | 0 | 0 |
| Mthfr-ps1     | 1 | 0 | 0 | 0 |
| Stap1         | 1 | 0 | 0 | 0 |
| XLOC_025323   | 1 | 0 | 0 | 0 |
| XLOC_025429   | 1 | 0 | 0 | 0 |
| Gm13830       | 2 | 0 | 0 | 0 |
| AK049264      | 2 | 0 | 0 | 0 |
| mKIAA0614     | 2 | 0 | 0 | 0 |
| Tmed2         | 1 | 0 | 0 | 0 |
| XLOC_025527   | 2 | 0 | 0 | 0 |
| Fzd10         | 1 | 0 | 0 | 0 |
| AK005905      | 1 | 0 | 0 | 0 |
| XLOC_025644   | 1 | 0 | 0 | 0 |
| Gm9758        | 2 | 0 | 0 | 0 |
| Atg9b         | 2 | 0 | 0 | 0 |
| Wdr86         | 1 | 0 | 0 | 0 |
| Crygn         | 1 | 0 | 0 | 0 |
| Kat2b-ps      | 1 | 0 | 0 | 0 |
| AK030263      | 1 | 0 | 0 | 0 |
| AK003103      | 1 | 0 | 0 | 0 |
| XLOC_026066   | 1 | 0 | 0 | 0 |
| Oas3          | 1 | 0 | 0 | 0 |

|               |    |   |   |   |
|---------------|----|---|---|---|
| Oas1e         | 1  | 0 | 0 | 0 |
| Psph          | 1  | 0 | 0 | 0 |
| 2010001M06Rik | 3  | 0 | 0 | 0 |
| XLOC_026242   | 3  | 0 | 0 | 0 |
| 1700109H08Rik | 1  | 0 | 0 | 0 |
| Gm6465        | 1  | 0 | 0 | 0 |
| 2010209O12Rik | 2  | 0 | 0 | 0 |
| XLOC_025235   | 2  | 0 | 0 | 0 |
| Rhoh          | 1  | 0 | 0 | 0 |
| XLOC_025387   | 1  | 0 | 0 | 0 |
| XLOC_025396   | 2  | 0 | 0 | 0 |
| AK142681      | 2  | 0 | 0 | 0 |
| XLOC_025432   | 2  | 0 | 0 | 0 |
| XLOC_025523   | 1  | 0 | 0 | 0 |
| XLOC_025574   | 1  | 0 | 0 | 0 |
| XLOC_025641   | 1  | 0 | 0 | 0 |
| XLOC_025705   | 1  | 0 | 0 | 0 |
| Speer4e       | 1  | 0 | 0 | 0 |
| Fastk         | 1  | 0 | 0 | 0 |
| Smarcd3       | 2  | 0 | 0 | 0 |
| Gm10220       | 1  | 0 | 0 | 0 |
| Rpl9          | 1  | 0 | 0 | 0 |
| Tmprss11f     | 1  | 0 | 0 | 0 |
| Ccdc158       | 1  | 0 | 0 | 0 |
| Slc26a1       | 2  | 0 | 0 | 0 |
| AK053084      | 1  | 0 | 0 | 0 |
| Gm10167       | 1  | 0 | 0 | 0 |
| XLOC_025226   | 1  | 0 | 0 | 0 |
| AK149205      | 1  | 0 | 0 | 0 |
| XLOC_025266   | 1  | 0 | 0 | 0 |
| XLOC_025288   | 1  | 0 | 0 | 0 |
| Znf326        | 1  | 0 | 0 | 0 |
| Sumf2         | 1  | 0 | 0 | 0 |
| XLOC_025636   | 1  | 0 | 0 | 0 |
| Cpz           | 1  | 0 | 0 | 0 |
| XLOC_025900   | 1  | 0 | 0 | 0 |
| AK138792      | 1  | 0 | 0 | 0 |
| Srrd          | 1  | 0 | 0 | 0 |
| XLOC_026131   | 1  | 0 | 0 | 0 |
| XLOC_026135   | 1  | 0 | 0 | 0 |
| Ccdc132       | 3  | 0 | 0 | 0 |
| Gng11         | 1  | 0 | 0 | 0 |
| XLOC_027557   | 3  | 0 | 0 | 0 |
| Col1a2        | 7  | 0 | 0 | 0 |
| Casd1         | 4  | 0 | 0 | 0 |
| Neurabin      | 10 | 0 | 0 | 0 |
| Dync1i1       | 4  | 0 | 0 | 0 |

|               |   |   |   |   |
|---------------|---|---|---|---|
| Acn9          | 1 | 0 | 0 | 0 |
| Tac1          | 9 | 0 | 0 | 0 |
| C1galt1       | 1 | 0 | 0 | 0 |
| Mios          | 1 | 0 | 0 | 0 |
| Phf14         | 4 | 0 | 0 | 0 |
| Tmem106b      | 2 | 0 | 0 | 0 |
| AK003812      | 3 | 0 | 0 | 0 |
| Mdfic         | 4 | 0 | 0 | 0 |
| Tes           | 1 | 0 | 0 | 0 |
| Cav2          | 1 | 0 | 0 | 0 |
| Cav1          | 6 | 0 | 0 | 0 |
| Met           | 4 | 0 | 0 | 0 |
| Capza2        | 1 | 0 | 0 | 0 |
| St7           | 7 | 0 | 0 | 0 |
| Naa38         | 1 | 0 | 0 | 0 |
| Ing3          | 2 | 0 | 0 | 0 |
| Wnt16         | 3 | 0 | 0 | 0 |
| XLOC_027589   | 3 | 0 | 0 | 0 |
| Ptprz1        | 8 | 0 | 0 | 0 |
| 6530409C15Rik | 2 | 0 | 0 | 0 |
| Arf5          | 2 | 0 | 0 | 0 |
| Snd1          | 7 | 0 | 0 | 0 |
| Gm3294        | 4 | 0 | 0 | 0 |
| 2310016C08Rik | 1 | 0 | 0 | 0 |
| Calu          | 2 | 0 | 0 | 0 |
| Ccdc136       | 5 | 0 | 0 | 0 |
| Atp6v1f       | 1 | 0 | 0 | 0 |
| Irf5          | 3 | 0 | 0 | 0 |
| Tspan33       | 2 | 0 | 0 | 0 |
| Smo           | 2 | 0 | 0 | 0 |
| Ahcyl2        | 8 | 0 | 0 | 0 |
| Fam40b        | 4 | 0 | 0 | 0 |
| Nrf1          | 5 | 0 | 0 | 0 |
| Klhdc10       | 4 | 0 | 0 | 0 |
| 1700025E21Rik | 1 | 0 | 0 | 0 |
| Mest          | 1 | 0 | 0 | 0 |
| Gm13844       | 1 | 0 | 0 | 0 |
| Mkln1         | 5 | 0 | 0 | 0 |
| AK080631      | 7 | 0 | 0 | 0 |
| XLOC_027620   | 1 | 0 | 0 | 0 |
| Exoc4         | 6 | 0 | 0 | 0 |
| Akr1b10       | 1 | 0 | 0 | 0 |
| Bpgm          | 1 | 0 | 0 | 0 |
| Cald1         | 3 | 0 | 0 | 0 |
| XLOC_027632   | 4 | 0 | 0 | 0 |
| 1810058I24Rik | 4 | 0 | 0 | 0 |
| XLOC_027634   | 1 | 0 | 0 | 0 |

|               |    |   |   |   |
|---------------|----|---|---|---|
| Chrm2         | 3  | 0 | 0 | 0 |
| Trim24        | 6  | 0 | 0 | 0 |
| Ubn2          | 3  | 0 | 0 | 0 |
| 1110001J03Rik | 1  | 0 | 0 | 0 |
| Luc7l2        | 12 | 0 | 0 | 0 |
| Tbxas1        | 5  | 0 | 0 | 0 |
| Rab19         | 1  | 0 | 0 | 0 |
| AK047163      | 2  | 0 | 0 | 0 |
| Adck2         | 3  | 0 | 0 | 0 |
| Ndufb2        | 2  | 0 | 0 | 0 |
| Gm5567        | 2  | 0 | 0 | 0 |
| Agk           | 6  | 0 | 0 | 0 |
| Ssbp1         | 5  | 0 | 0 | 0 |
| H4            | 2  | 0 | 0 | 0 |
| Ephb6         | 6  | 0 | 0 | 0 |
| Gstk1         | 1  | 0 | 0 | 0 |
| Casp2         | 6  | 0 | 0 | 0 |
| Zyx           | 9  | 0 | 0 | 0 |
| Zfp282        | 3  | 0 | 0 | 0 |
| XLOC_027668   | 1  | 0 | 0 | 0 |
| mKIAA4190     | 8  | 0 | 0 | 0 |
| AI894139      | 1  | 0 | 0 | 0 |
| Sspo          | 13 | 0 | 0 | 0 |
| Atp6v0e2      | 3  | 0 | 0 | 0 |
| Lrrc61        | 2  | 0 | 0 | 0 |
| Repin1        | 7  | 0 | 0 | 0 |
| Zfp775        | 1  | 0 | 0 | 0 |
| Gimap8        | 4  | 0 | 0 | 0 |
| Gimap4        | 3  | 0 | 0 | 0 |
| Gimap5        | 4  | 0 | 0 | 0 |
| Tmem176a      | 6  | 0 | 0 | 0 |
| Gpnmb         | 2  | 0 | 0 | 0 |
| 2410003K15Rik | 7  | 0 | 0 | 0 |
| Ccdc126       | 2  | 0 | 0 | 0 |
| D330028D13Rik | 3  | 0 | 0 | 0 |
| Npy           | 4  | 0 | 0 | 0 |
| Mpp6          | 4  | 0 | 0 | 0 |
| Snx10         | 8  | 0 | 0 | 0 |
| Tax1bp1       | 7  | 0 | 0 | 0 |
| Creb5         | 4  | 0 | 0 | 0 |
| Chn2          | 4  | 0 | 0 | 0 |
| Wipf3         | 2  | 0 | 0 | 0 |
| Plekha8       | 1  | 0 | 0 | 0 |
| 2410066E13Rik | 2  | 0 | 0 | 0 |
| Znrf2         | 1  | 0 | 0 | 0 |
| Fam188b       | 3  | 0 | 0 | 0 |
| Aqp1          | 3  | 0 | 0 | 0 |

|               |    |   |   |   |
|---------------|----|---|---|---|
| XLOC_027712   | 2  | 0 | 0 | 0 |
| Avl9          | 2  | 0 | 0 | 0 |
| Fkbp9         | 1  | 0 | 0 | 0 |
| Herc6         | 3  | 0 | 0 | 0 |
| Lancl2        | 4  | 0 | 0 | 0 |
| Rps15-ps2     | 1  | 0 | 0 | 0 |
| Abcg2         | 4  | 0 | 0 | 0 |
| Tigd2         | 1  | 0 | 0 | 0 |
| Fam190a       | 4  | 0 | 0 | 0 |
| Grid2         | 3  | 0 | 0 | 0 |
| XLOC_027723   | 2  | 0 | 0 | 0 |
| Smarcad1      | 3  | 0 | 0 | 0 |
| C130060K24Rik | 4  | 0 | 0 | 0 |
| A930038C07Rik | 2  | 0 | 0 | 0 |
| Mad2l1        | 7  | 0 | 0 | 0 |
| Gng12         | 3  | 0 | 0 | 0 |
| Gm8566        | 1  | 0 | 0 | 0 |
| Serbp1        | 4  | 0 | 0 | 0 |
| Eif2ak3       | 3  | 0 | 0 | 0 |
| Krcc1         | 2  | 0 | 0 | 0 |
| Rnf103        | 3  | 0 | 0 | 0 |
| Vps24         | 7  | 0 | 0 | 0 |
| Reep1         | 2  | 0 | 0 | 0 |
| Immt          | 10 | 0 | 0 | 0 |
| Polr1a        | 4  | 0 | 0 | 0 |
| St3gal5       | 1  | 0 | 0 | 0 |
| 0610030E20Rik | 4  | 0 | 0 | 0 |
| Tmem150a      | 2  | 0 | 0 | 0 |
| Ggcx          | 1  | 0 | 0 | 0 |
| Capg          | 4  | 0 | 0 | 0 |
| Suclg1        | 5  | 0 | 0 | 0 |
| Lrrtm1        | 6  | 0 | 0 | 0 |
| Lrrtm4        | 4  | 0 | 0 | 0 |
| Fam176a       | 1  | 0 | 0 | 0 |
| Ccdc142       | 5  | 0 | 0 | 0 |
| Mogs          | 1  | 0 | 0 | 0 |
| Rtkn          | 7  | 0 | 0 | 0 |
| Dctn1         | 13 | 0 | 0 | 0 |
| Mobkl1b       | 2  | 0 | 0 | 0 |
| Bola3         | 1  | 0 | 0 | 0 |
| B230319C09Rik | 3  | 0 | 0 | 0 |
| XLOC_027769   | 2  | 0 | 0 | 0 |
| Nagk          | 8  | 0 | 0 | 0 |
| Zfml          | 7  | 0 | 0 | 0 |
| Dysf          | 6  | 0 | 0 | 0 |
| Cct7          | 5  | 0 | 0 | 0 |
| Gm10443       | 1  | 0 | 0 | 0 |

|               |    |   |   |   |
|---------------|----|---|---|---|
| Fam136a       | 5  | 0 | 0 | 0 |
| Snrpg         | 4  | 0 | 0 | 0 |
| Tia1          | 11 | 0 | 0 | 0 |
| C87436        | 6  | 0 | 0 | 0 |
| Aak1          | 8  | 0 | 0 | 0 |
| Nfu1          | 7  | 0 | 0 | 0 |
| Gfpt1         | 4  | 0 | 0 | 0 |
| XLOC_027791   | 1  | 0 | 0 | 0 |
| Copg          | 7  | 0 | 0 | 0 |
| 8430410A17Rik | 3  | 0 | 0 | 0 |
| Rpn1          | 1  | 0 | 0 | 0 |
| Ruvbl1        | 9  | 0 | 0 | 0 |
| Mgll          | 3  | 0 | 0 | 0 |
| Tpra1         | 4  | 0 | 0 | 0 |
| Txnrd3        | 2  | 0 | 0 | 0 |
| Zxdc          | 3  | 0 | 0 | 0 |
| Klf15         | 4  | 0 | 0 | 0 |
| Aldh1l1       | 4  | 0 | 0 | 0 |
| Slc41a3       | 1  | 0 | 0 | 0 |
| Hdac11        | 2  | 0 | 0 | 0 |
| Fbln2         | 8  | 0 | 0 | 0 |
| AK007770      | 2  | 0 | 0 | 0 |
| Tmem43        | 4  | 0 | 0 | 0 |
| Lsm3          | 1  | 0 | 0 | 0 |
| Slc6a6        | 4  | 0 | 0 | 0 |
| C130022K22Rik | 2  | 0 | 0 | 0 |
| AK043032      | 3  | 0 | 0 | 0 |
| Slc25a26      | 2  | 0 | 0 | 0 |
| Kbtbd8        | 4  | 0 | 0 | 0 |
| XLOC_027827   | 3  | 0 | 0 | 0 |
| Chl1          | 6  | 0 | 0 | 0 |
| Cntn6         | 6  | 0 | 0 | 0 |
| Lrrn1         | 4  | 0 | 0 | 0 |
| Setmar        | 1  | 0 | 0 | 0 |
| Itpr1         | 10 | 0 | 0 | 0 |
| Bhlhe40       | 4  | 0 | 0 | 0 |
| Arl8b         | 2  | 0 | 0 | 0 |
| Edem1         | 3  | 0 | 0 | 0 |
| Grm7          | 1  | 0 | 0 | 0 |
| Lmcd1         | 3  | 0 | 0 | 0 |
| Gm16598       | 2  | 0 | 0 | 0 |
| Thumpd3       | 3  | 0 | 0 | 0 |
| Setd5         | 9  | 0 | 0 | 0 |
| Mtmr14        | 2  | 0 | 0 | 0 |
| Cpne9         | 4  | 0 | 0 | 0 |
| Brpf1         | 7  | 0 | 0 | 0 |
| Ogg1          | 2  | 0 | 0 | 0 |



|               |       |    |   |   |   |
|---------------|-------|----|---|---|---|
| Arpc4         |       | 4  | 0 | 0 | 0 |
| Jagn1         |       | 4  | 0 | 0 | 0 |
| Il17re        |       | 1  | 0 | 0 | 0 |
| Il17rc        |       | 6  | 0 | 0 | 0 |
| Creld1        |       | 3  | 0 | 0 | 0 |
| Fancd2        |       | 7  | 0 | 0 | 0 |
| 6720456B07Rik |       | 3  | 0 | 0 | 0 |
| Vhl           |       | 1  | 0 | 0 | 0 |
| Irak2         |       | 4  | 0 | 0 | 0 |
| Tatdn2        |       | 3  | 0 | 0 | 0 |
| Atg7          |       | 3  | 0 | 0 | 0 |
| Pparg         |       | 6  | 0 | 0 | 0 |
| Tsen2         |       | 4  | 0 | 0 | 0 |
| Mkxn2         |       | 3  | 0 | 0 | 0 |
| Cand2         |       | 4  | 0 | 0 | 0 |
| Ift122        |       | 1  | 0 | 0 | 0 |
| mFLJ00025     |       | 4  | 0 | 0 | 0 |
| Rho           |       | 4  | 0 | 0 | 0 |
| D6Wsu116e     |       | 5  | 0 | 0 | 0 |
| Anubl1        |       | 4  | 0 | 0 | 0 |
|               | 41706 | 11 | 0 | 0 | 0 |
| 8430408G22Rik |       | 2  | 0 | 0 | 0 |
| Cxcl12        |       | 3  | 0 | 0 | 0 |
| Zfp637        |       | 6  | 0 | 0 | 0 |
| Zfp239        |       | 5  | 0 | 0 | 0 |
| Dcp1b         |       | 8  | 0 | 0 | 0 |
| Fbxl14        |       | 1  | 0 | 0 | 0 |
| Kdm5a         |       | 9  | 0 | 0 | 0 |
| Il17ra        |       | 3  | 0 | 0 | 0 |
| Bcl2l13       |       | 1  | 0 | 0 | 0 |
| Pex26         |       | 2  | 0 | 0 | 0 |
| Tuba8         |       | 2  | 0 | 0 | 0 |
| Usp18         |       | 2  | 0 | 0 | 0 |
| A2m           |       | 3  | 0 | 0 | 0 |
| M6pr          |       | 3  | 0 | 0 | 0 |
| Foxj2         |       | 3  | 0 | 0 | 0 |
| Necap1        |       | 1  | 0 | 0 | 0 |
| Clec4a3       |       | 3  | 0 | 0 | 0 |
| C1rl          |       | 2  | 0 | 0 | 0 |
| C1rb          |       | 1  | 0 | 0 | 0 |
| Lpcat3        |       | 4  | 0 | 0 | 0 |
| Mlf2          |       | 2  | 0 | 0 | 0 |
| C530028O21Rik |       | 4  | 0 | 0 | 0 |
| XLOC_027929   |       | 1  | 0 | 0 | 0 |
| Zfp384        |       | 6  | 0 | 0 | 0 |
| Acrbp         |       | 8  | 0 | 0 | 0 |
| Lpar5         |       | 5  | 0 | 0 | 0 |

|               |    |   |   |   |
|---------------|----|---|---|---|
| Chd4          | 10 | 0 | 0 | 0 |
| Nop2          | 2  | 0 | 0 | 0 |
| Iffo1         | 9  | 0 | 0 | 0 |
| Mrpl51        | 2  | 0 | 0 | 0 |
| Vamp1         | 2  | 0 | 0 | 0 |
| Scnn1a        | 2  | 0 | 0 | 0 |
| Vwf           | 3  | 0 | 0 | 0 |
| Ano2          | 3  | 0 | 0 | 0 |
| XLOC_027942   | 8  | 0 | 0 | 0 |
| Akap3         | 1  | 0 | 0 | 0 |
| D6Wsu163e     | 4  | 0 | 0 | 0 |
| Parp11        | 4  | 0 | 0 | 0 |
| Efcab4b       | 2  | 0 | 0 | 0 |
| XLOC_027948   | 2  | 0 | 0 | 0 |
| Rpl18-ps2     | 1  | 0 | 0 | 0 |
| Foxm1         | 6  | 0 | 0 | 0 |
| Nrip2         | 3  | 0 | 0 | 0 |
| Gm10069       | 2  | 0 | 0 | 0 |
| BC064078      | 1  | 0 | 0 | 0 |
| Clec12a       | 2  | 0 | 0 | 0 |
| Gabarapl1     | 4  | 0 | 0 | 0 |
| 2700089E24Rik | 1  | 0 | 0 | 0 |
| XLOC_027968   | 1  | 0 | 0 | 0 |
| Etv6          | 4  | 0 | 0 | 0 |
| Bcl2l14       | 2  | 0 | 0 | 0 |
| Loh12cr1      | 3  | 0 | 0 | 0 |
| Crebl2        | 4  | 0 | 0 | 0 |
| Cdkn1b        | 1  | 0 | 0 | 0 |
| Apold1        | 1  | 0 | 0 | 0 |
| Ddx47         | 1  | 0 | 0 | 0 |
| Gprc5a        | 1  | 0 | 0 | 0 |
| 8430419L09Rik | 6  | 0 | 0 | 0 |
| Emp1          | 1  | 0 | 0 | 0 |
| Atf7ip        | 5  | 0 | 0 | 0 |
| H2afj         | 1  | 0 | 0 | 0 |
| Strap         | 4  | 0 | 0 | 0 |
| Mgst1         | 2  | 0 | 0 | 0 |
| Aebp2         | 2  | 0 | 0 | 0 |
| Pyroxd1       | 1  | 0 | 0 | 0 |
| Golt1b        | 2  | 0 | 0 | 0 |
| Cmas          | 1  | 0 | 0 | 0 |
| Etnk1         | 2  | 0 | 0 | 0 |
| AK016914      | 1  | 0 | 0 | 0 |
| Lrmp          | 6  | 0 | 0 | 0 |
| Lym5          | 1  | 0 | 0 | 0 |
| Gm15706       | 2  | 0 | 0 | 0 |
| Rps25-ps1     | 1  | 0 | 0 | 0 |

|               |   |   |   |   |
|---------------|---|---|---|---|
| Rassf8        | 5 | 0 | 0 | 0 |
| Sspn          | 5 | 0 | 0 | 0 |
| Fgfr1op2      | 2 | 0 | 0 | 0 |
| Med21         | 1 | 0 | 0 | 0 |
| Stk38l        | 7 | 0 | 0 | 0 |
| Arntl2        | 9 | 0 | 0 | 0 |
| Ppfibp1       | 6 | 0 | 0 | 0 |
| Mrps35        | 2 | 0 | 0 | 0 |
| Klhdc5        | 3 | 0 | 0 | 0 |
| Ccdc91        | 4 | 0 | 0 | 0 |
| 4833442J19Rik | 1 | 0 | 0 | 0 |
| 2810474O19Rik | 3 | 0 | 0 | 0 |
| Bicd1         | 5 | 0 | 0 | 0 |
| XLOC_028026   | 2 | 0 | 0 | 0 |
| AK035387      | 4 | 0 | 0 | 0 |
| Hepacam2      | 3 | 0 | 0 | 0 |
| Bet1          | 1 | 0 | 0 | 0 |
| Sgce          | 7 | 0 | 0 | 0 |
| Pon3          | 4 | 0 | 0 | 0 |
| Pon2          | 4 | 0 | 0 | 0 |
| Pdk4          | 1 | 0 | 0 | 0 |
| Slc25a13      | 3 | 0 | 0 | 0 |
| Shfm1         | 2 | 0 | 0 | 0 |
| Asns          | 9 | 0 | 0 | 0 |
| Col28a1       | 9 | 0 | 0 | 0 |
| Rpa3          | 5 | 0 | 0 | 0 |
| AK037260      | 1 | 0 | 0 | 0 |
| BC062820      | 1 | 0 | 0 | 0 |
| Ica1          | 7 | 0 | 0 | 0 |
| Ndufa4        | 2 | 0 | 0 | 0 |
| Thsd7a        | 2 | 0 | 0 | 0 |
| Tmem168       | 5 | 0 | 0 | 0 |
| B630005N14Rik | 2 | 0 | 0 | 0 |
| Gpr85         | 7 | 0 | 0 | 0 |
| 2610001J05Rik | 4 | 0 | 0 | 0 |
| Cttnbp2       | 6 | 0 | 0 | 0 |
| Fam3c         | 5 | 0 | 0 | 0 |
| Cadps2        | 7 | 0 | 0 | 0 |
| Ndufa5        | 5 | 0 | 0 | 0 |
| Wasl          | 2 | 0 | 0 | 0 |
| Tmem229a      | 1 | 0 | 0 | 0 |
| Gpr37         | 1 | 0 | 0 | 0 |
| Pot1a         | 4 | 0 | 0 | 0 |
| Prrt4         | 3 | 0 | 0 | 0 |
| Impdh1        | 7 | 0 | 0 | 0 |
| Kcp           | 6 | 0 | 0 | 0 |
| Tnpo3         | 5 | 0 | 0 | 0 |

|               |    |   |   |   |
|---------------|----|---|---|---|
| Zc3hc1        | 3  | 0 | 0 | 0 |
| Tmem209       | 5  | 0 | 0 | 0 |
| Tsga14        | 3  | 0 | 0 | 0 |
| Copg2         | 6  | 0 | 0 | 0 |
| BC145649      | 3  | 0 | 0 | 0 |
| Gm13835       | 1  | 0 | 0 | 0 |
| Podxl         | 4  | 0 | 0 | 0 |
| AK085570      | 1  | 0 | 0 | 0 |
| Plxna4        | 3  | 0 | 0 | 0 |
| Slc35b4       | 5  | 0 | 0 | 0 |
| 2010107G12Rik | 2  | 0 | 0 | 0 |
| Cnot4         | 6  | 0 | 0 | 0 |
| Slc13a4       | 4  | 0 | 0 | 0 |
| Fam180a       | 1  | 0 | 0 | 0 |
| Mtpn          | 2  | 0 | 0 | 0 |
| Ptn           | 6  | 0 | 0 | 0 |
| Creb3l2       | 5  | 0 | 0 | 0 |
| Atp6v0a4      | 1  | 0 | 0 | 0 |
| Zc3hav1l      | 1  | 0 | 0 | 0 |
| Zc3hav1       | 7  | 0 | 0 | 0 |
| Hipk2         | 5  | 0 | 0 | 0 |
| Parp12        | 4  | 0 | 0 | 0 |
| Jhdm1d        | 4  | 0 | 0 | 0 |
| Slc37a3       | 2  | 0 | 0 | 0 |
| Mkrn1         | 5  | 0 | 0 | 0 |
| Dennd2a       | 7  | 0 | 0 | 0 |
| E330009J07Rik | 2  | 0 | 0 | 0 |
| Fam131b       | 3  | 0 | 0 | 0 |
| Fam115c       | 4  | 0 | 0 | 0 |
| Fam115a       | 10 | 0 | 0 | 0 |
| Pdia4         | 2  | 0 | 0 | 0 |
| Zfp786        | 3  | 0 | 0 | 0 |
| Zfp777        | 5  | 0 | 0 | 0 |
| Zfp746        | 6  | 0 | 0 | 0 |
| AK158926      | 1  | 0 | 0 | 0 |
| Rarres2       | 6  | 0 | 0 | 0 |
| Gimap6        | 1  | 0 | 0 | 0 |
| Tmem176b      | 5  | 0 | 0 | 0 |
| Tra2a         | 7  | 0 | 0 | 0 |
| Dfna5         | 2  | 0 | 0 | 0 |
| Osbpl3        | 8  | 0 | 0 | 0 |
| XLOC_028161   | 2  | 0 | 0 | 0 |
| 4921507P07Rik | 1  | 0 | 0 | 0 |
| Hnrnpa2b1     | 5  | 0 | 0 | 0 |
| Skap2         | 1  | 0 | 0 | 0 |
| Hoxa3         | 5  | 0 | 0 | 0 |
| Hoxa5         | 3  | 0 | 0 | 0 |

|             |    |   |   |   |
|-------------|----|---|---|---|
| Hoxa7       | 6  | 0 | 0 | 0 |
| Hoxa9       | 7  | 0 | 0 | 0 |
| Hoxa10      | 4  | 0 | 0 | 0 |
| Hoxa11      | 1  | 0 | 0 | 0 |
| Jazf1       | 2  | 0 | 0 | 0 |
| Scrn1       | 6  | 0 | 0 | 0 |
| Fkbp14      | 1  | 0 | 0 | 0 |
| Ggct        | 2  | 0 | 0 | 0 |
| Crhr2       | 6  | 0 | 0 | 0 |
| Inmt        | 1  | 0 | 0 | 0 |
| Pde1c       | 8  | 0 | 0 | 0 |
| Kbtbd2      | 4  | 0 | 0 | 0 |
| Nt5c3       | 5  | 0 | 0 | 0 |
| Pigy        | 1  | 0 | 0 | 0 |
| Vopp1       | 6  | 0 | 0 | 0 |
| Nap115      | 1  | 0 | 0 | 0 |
| Fam13a      | 1  | 0 | 0 | 0 |
| Gprin3      | 1  | 0 | 0 | 0 |
| Snca        | 2  | 0 | 0 | 0 |
| AK158619    | 1  | 0 | 0 | 0 |
| Rpia        | 3  | 0 | 0 | 0 |
| Thns12      | 3  | 0 | 0 | 0 |
| Smyd1       | 5  | 0 | 0 | 0 |
| Rmnd5a      | 4  | 0 | 0 | 0 |
| Mrpl35      | 2  | 0 | 0 | 0 |
| Ptcd3       | 7  | 0 | 0 | 0 |
| Atoh8       | 1  | 0 | 0 | 0 |
| Rnf181      | 5  | 0 | 0 | 0 |
| Vamp5       | 2  | 0 | 0 | 0 |
| Mat2a       | 5  | 0 | 0 | 0 |
| Sh2d6       | 5  | 0 | 0 | 0 |
| Elmod3      | 3  | 0 | 0 | 0 |
| Tgoln2      | 1  | 0 | 0 | 0 |
| Kcmf1       | 2  | 0 | 0 | 0 |
| Tmsb10      | 4  | 0 | 0 | 0 |
| Dnahc6      | 12 | 0 | 0 | 0 |
| XLOC_028220 | 1  | 0 | 0 | 0 |
| Ctnna2      | 13 | 0 | 0 | 0 |
| Mrpl19      | 1  | 0 | 0 | 0 |
| Pole4       | 3  | 0 | 0 | 0 |
| Hk2         | 4  | 0 | 0 | 0 |
| Sema4f      | 6  | 0 | 0 | 0 |
| Htra2       | 2  | 0 | 0 | 0 |
| Tlx2        | 4  | 0 | 0 | 0 |
| Wbp1        | 8  | 0 | 0 | 0 |
| Mthfd2      | 3  | 0 | 0 | 0 |
| Tet3        | 3  | 0 | 0 | 0 |

|               |    |   |   |   |
|---------------|----|---|---|---|
| Dguok         | 2  | 0 | 0 | 0 |
| Stambp        | 3  | 0 | 0 | 0 |
| Tex261        | 2  | 0 | 0 | 0 |
| Paip2b        | 2  | 0 | 0 | 0 |
| Cyp26b1       | 4  | 0 | 0 | 0 |
| Exoc6b        | 6  | 0 | 0 | 0 |
| Spr           | 2  | 0 | 0 | 0 |
| Sfxn5         | 5  | 0 | 0 | 0 |
| Rab11fip5     | 5  | 0 | 0 | 0 |
| Fbxo41        | 3  | 0 | 0 | 0 |
| Dusp11        | 8  | 0 | 0 | 0 |
| Pcyox1        | 3  | 0 | 0 | 0 |
| AK009724      | 2  | 0 | 0 | 0 |
| Mxd1          | 3  | 0 | 0 | 0 |
| Snrnp27       | 1  | 0 | 0 | 0 |
| Gmcl1         | 4  | 0 | 0 | 0 |
| Anxa4         | 2  | 0 | 0 | 0 |
| Antxr1        | 4  | 0 | 0 | 0 |
| Prokr1        | 5  | 0 | 0 | 0 |
| Rab43         | 1  | 0 | 0 | 0 |
| Isy1          | 3  | 0 | 0 | 0 |
| Cnbp          | 4  | 0 | 0 | 0 |
| Rab7          | 6  | 0 | 0 | 0 |
| Eefsec        | 1  | 0 | 0 | 0 |
| Sec61a1       | 2  | 0 | 0 | 0 |
| Kbtbd12       | 1  | 0 | 0 | 0 |
| Abtb1         | 6  | 0 | 0 | 0 |
| Podxl2        | 2  | 0 | 0 | 0 |
| Mcm2          | 2  | 0 | 0 | 0 |
| Plxna1        | 2  | 0 | 0 | 0 |
| Chchd6        | 2  | 0 | 0 | 0 |
| lqsec1        | 10 | 0 | 0 | 0 |
| Chchd4        | 3  | 0 | 0 | 0 |
| Xpc           | 4  | 0 | 0 | 0 |
| Grip2         | 10 | 0 | 0 | 0 |
| Mrps25        | 1  | 0 | 0 | 0 |
| Zfyve20       | 5  | 0 | 0 | 0 |
| Prickle2      | 6  | 0 | 0 | 0 |
| Magi1         | 11 | 0 | 0 | 0 |
| Lrig1         | 1  | 0 | 0 | 0 |
| Fam19a4       | 5  | 0 | 0 | 0 |
| A130022J15Rik | 2  | 0 | 0 | 0 |
| Tmf1          | 3  | 0 | 0 | 0 |
| Uba3          | 8  | 0 | 0 | 0 |
| Gm765         | 6  | 0 | 0 | 0 |
| Eif4e3        | 5  | 0 | 0 | 0 |
| Gm14456       | 1  | 0 | 0 | 0 |

|               |    |   |   |   |
|---------------|----|---|---|---|
| Rybp          | 2  | 0 | 0 | 0 |
| Shq1          | 4  | 0 | 0 | 0 |
| Pdzrn3        | 2  | 0 | 0 | 0 |
| Crbn          | 8  | 0 | 0 | 0 |
| Sumf1         | 4  | 0 | 0 | 0 |
| Gm4604        | 1  | 0 | 0 | 0 |
| Gm16433       | 1  | 0 | 0 | 0 |
| AK039720      | 1  | 0 | 0 | 0 |
| Oxtr          | 3  | 0 | 0 | 0 |
| Lhfp14        | 6  | 0 | 0 | 0 |
| Camk1         | 5  | 0 | 0 | 0 |
| Tmem111       | 3  | 0 | 0 | 0 |
| Sec13         | 4  | 0 | 0 | 0 |
| Atp2b2        | 9  | 0 | 0 | 0 |
| Vgll4         | 2  | 0 | 0 | 0 |
| 1500001M20Rik | 2  | 0 | 0 | 0 |
| Raf1          | 6  | 0 | 0 | 0 |
| Rpl32         | 3  | 0 | 0 | 0 |
| Plxnd1        | 10 | 0 | 0 | 0 |
| Tmcc1         | 8  | 0 | 0 | 0 |
| Rassf4        | 3  | 0 | 0 | 0 |
| Tmem72        | 5  | 0 | 0 | 0 |
| Csgalnact2    | 4  | 0 | 0 | 0 |
| Ret           | 12 | 0 | 0 | 0 |
| Bms1          | 5  | 0 | 0 | 0 |
| Zfp248        | 5  | 0 | 0 | 0 |
| Ankrd26       | 4  | 0 | 0 | 0 |
| Cacna1c       | 6  | 0 | 0 | 0 |
| Lrtm2         | 3  | 0 | 0 | 0 |
| Adipor2       | 3  | 0 | 0 | 0 |
| Erc1          | 9  | 0 | 0 | 0 |
| Wnk1          | 12 | 0 | 0 | 0 |
| B4galnt3      | 4  | 0 | 0 | 0 |
| Cecr5         | 6  | 0 | 0 | 0 |
| Atp6v1e1      | 5  | 0 | 0 | 0 |
| Bid           | 2  | 0 | 0 | 0 |
| Iqsec3        | 6  | 0 | 0 | 0 |
| Phc1          | 6  | 0 | 0 | 0 |
| Slc2a3        | 9  | 0 | 0 | 0 |
| Pex5          | 4  | 0 | 0 | 0 |
| Clstn3        | 2  | 0 | 0 | 0 |
| C1s           | 8  | 0 | 0 | 0 |
| Emg1          | 2  | 0 | 0 | 0 |
| Grcc10        | 1  | 0 | 0 | 0 |
| Eno2          | 7  | 0 | 0 | 0 |
| Tpi1          | 3  | 0 | 0 | 0 |
| Usp5          | 8  | 0 | 0 | 0 |

|               |   |   |   |   |
|---------------|---|---|---|---|
| Gnb3          | 3 | 0 | 0 | 0 |
| Lag3          | 8 | 0 | 0 | 0 |
| Ptms          | 8 | 0 | 0 | 0 |
| Cops7a        | 5 | 0 | 0 | 0 |
| Ncapd2        | 3 | 0 | 0 | 0 |
| Tapbp1        | 2 | 0 | 0 | 0 |
| AK085609      | 1 | 0 | 0 | 0 |
| Ltbr          | 2 | 0 | 0 | 0 |
| Plekhg6       | 2 | 0 | 0 | 0 |
| Cd9           | 4 | 0 | 0 | 0 |
| Ntf3          | 2 | 0 | 0 | 0 |
| Kcna5         | 1 | 0 | 0 | 0 |
| Kcna1         | 1 | 0 | 0 | 0 |
| Kcna6         | 1 | 0 | 0 | 0 |
| Ndufa9        | 3 | 0 | 0 | 0 |
| Dyrk4         | 6 | 0 | 0 | 0 |
| Rad51ap1      | 4 | 0 | 0 | 0 |
| 9630033F20Rik | 1 | 0 | 0 | 0 |
| Ccnd2         | 2 | 0 | 0 | 0 |
| Prmt8         | 2 | 0 | 0 | 0 |
| XLOC_028421   | 3 | 0 | 0 | 0 |
| AK033854      | 7 | 0 | 0 | 0 |
| Tead4         | 1 | 0 | 0 | 0 |
| Tulp3         | 2 | 0 | 0 | 0 |
| 5930416I19Rik | 3 | 0 | 0 | 0 |
| Itfg2         | 1 | 0 | 0 | 0 |
| Fkbp4         | 4 | 0 | 0 | 0 |
| BC048546      | 4 | 0 | 0 | 0 |
| Klrb1b        | 1 | 0 | 0 | 0 |
| AK009064      | 1 | 0 | 0 | 0 |
| AK036632      | 3 | 0 | 0 | 0 |
| Gm5581        | 1 | 0 | 0 | 0 |
| Magohb        | 2 | 0 | 0 | 0 |
| Csda          | 3 | 0 | 0 | 0 |
| Lrp6          | 3 | 0 | 0 | 0 |
| Mansc1        | 1 | 0 | 0 | 0 |
| Dusp16        | 1 | 0 | 0 | 0 |
| Hebp1         | 2 | 0 | 0 | 0 |
| Plbd1         | 1 | 0 | 0 | 0 |
| Wbp11         | 4 | 0 | 0 | 0 |
| Mgp           | 1 | 0 | 0 | 0 |
| Rerg          | 2 | 0 | 0 | 0 |
| Eps8          | 6 | 0 | 0 | 0 |
| Lmo3          | 5 | 0 | 0 | 0 |
| Rpl38-ps2     | 1 | 0 | 0 | 0 |
| Recql         | 1 | 0 | 0 | 0 |
| Ldhb          | 3 | 0 | 0 | 0 |



|               |    |   |   |   |
|---------------|----|---|---|---|
| Abcc9         | 5  | 0 | 0 | 0 |
| St8sia1       | 5  | 0 | 0 | 0 |
| 5730419I09Rik | 13 | 0 | 0 | 0 |
| XLOC_028478   | 3  | 0 | 0 | 0 |
| AK086149      | 1  | 0 | 0 | 0 |
| Bcat1         | 6  | 0 | 0 | 0 |
| Casc1         | 2  | 0 | 0 | 0 |
| Kras          | 1  | 0 | 0 | 0 |
| Bhlhe41       | 3  | 0 | 0 | 0 |
| XLOC_028490   | 1  | 0 | 0 | 0 |
| Itpr2         | 3  | 0 | 0 | 0 |
| Tm7sf3        | 4  | 0 | 0 | 0 |
| Pthlh         | 1  | 0 | 0 | 0 |
| Ergic2        | 4  | 0 | 0 | 0 |
| Tmtc1         | 5  | 0 | 0 | 0 |
| Ipo8          | 3  | 0 | 0 | 0 |
| Caprin2       | 10 | 0 | 0 | 0 |
| Dennd5b       | 5  | 0 | 0 | 0 |
| Amn1          | 4  | 0 | 0 | 0 |
| Gm15782       | 1  | 0 | 0 | 0 |
| Arhgef5       | 7  | 0 | 0 | 0 |
| XLOC_027664   | 1  | 0 | 0 | 0 |
| Zfp212        | 2  | 0 | 0 | 0 |
| Zfp956        | 1  | 0 | 0 | 0 |
| Zfp862        | 1  | 0 | 0 | 0 |
| 5730446D14Rik | 2  | 0 | 0 | 0 |
| Gars          | 3  | 0 | 0 | 0 |
| Herc3         | 5  | 0 | 0 | 0 |
| XLOC_027720   | 1  | 0 | 0 | 0 |
| AK054076      | 4  | 0 | 0 | 0 |
| Gm5576        | 1  | 0 | 0 | 0 |
| Aup1          | 2  | 0 | 0 | 0 |
| AK137133      | 1  | 0 | 0 | 0 |
| Smyd5         | 1  | 0 | 0 | 0 |
| Add2          | 4  | 0 | 0 | 0 |
| XLOC_027797   | 4  | 0 | 0 | 0 |
| Hnrnpf        | 4  | 0 | 0 | 0 |
| C1ra          | 2  | 0 | 0 | 0 |
| E130112N10Rik | 1  | 0 | 0 | 0 |
| XLOC_027949   | 3  | 0 | 0 | 0 |
| AK012387      | 1  | 0 | 0 | 0 |
| AK043509      | 4  | 0 | 0 | 0 |
| AK039595      | 1  | 0 | 0 | 0 |
| XLOC_028052   | 3  | 0 | 0 | 0 |
| AK085764      | 1  | 0 | 0 | 0 |
| Wdr91         | 3  | 0 | 0 | 0 |
| 9330158H04Rik | 2  | 0 | 0 | 0 |

|                       |   |   |   |   |
|-----------------------|---|---|---|---|
| Svopl                 | 2 | 0 | 0 | 0 |
| D630045J12Rik         | 7 | 0 | 0 | 0 |
| Klrg2                 | 5 | 0 | 0 | 0 |
| Braf                  | 3 | 0 | 0 | 0 |
| Hoxa4                 | 2 | 0 | 0 | 0 |
| 9130019P16Rik         | 1 | 0 | 0 | 0 |
| XLOC_028190           | 1 | 0 | 0 | 0 |
| Kdm3a                 | 3 | 0 | 0 | 0 |
| Tcf7l1                | 4 | 0 | 0 | 0 |
| 1700019G17Rik         | 2 | 0 | 0 | 0 |
| AK079912              | 1 | 0 | 0 | 0 |
| AK131825              | 8 | 0 | 0 | 0 |
| Foxp1                 | 5 | 0 | 0 | 0 |
| AK016007              | 1 | 0 | 0 | 0 |
| Rpusd3                | 2 | 0 | 0 | 0 |
| AK020619              | 1 | 0 | 0 | 0 |
| Ccdc77                | 4 | 0 | 0 | 0 |
| Atn1                  | 5 | 0 | 0 | 0 |
| Gpr162                | 2 | 0 | 0 | 0 |
| XLOC_028410           | 3 | 0 | 0 | 0 |
| XLOC_028420           | 1 | 0 | 0 | 0 |
| Gm5886                | 2 | 0 | 0 | 0 |
| Gpr19                 | 2 | 0 | 0 | 0 |
| Arhgdib               | 5 | 0 | 0 | 0 |
| Slco1a5               | 1 | 0 | 0 | 0 |
| XLOC_028486           | 1 | 0 | 0 | 0 |
| Gm15767               | 2 | 0 | 0 | 0 |
| Ppp1r9a               | 1 | 0 | 0 | 0 |
| XLOC_027565           | 1 | 0 | 0 | 0 |
| Gig18                 | 1 | 0 | 0 | 0 |
| AK052888              | 1 | 0 | 0 | 0 |
| AK081964              | 1 | 0 | 0 | 0 |
| XLOC_027592           | 1 | 0 | 0 | 0 |
| AK006282              | 1 | 0 | 0 | 0 |
| BB283400              | 1 | 0 | 0 | 0 |
| Gm14546               | 1 | 0 | 0 | 0 |
| Tmem140               | 1 | 0 | 0 | 0 |
| Nup205                | 3 | 0 | 0 | 0 |
| XLOC_027637           | 1 | 0 | 0 | 0 |
| XLOC_027651           | 1 | 0 | 0 | 0 |
| TCRBVbeta5.1/Jbeta1.5 | 2 | 0 | 0 | 0 |
| Cntnap2               | 5 | 0 | 0 | 0 |
| XLOC_027665           | 2 | 0 | 0 | 0 |
| Gimap9                | 1 | 0 | 0 | 0 |
| XLOC_027689           | 5 | 0 | 0 | 0 |
| Nfe2l3                | 1 | 0 | 0 | 0 |
| Adcyap1r1             | 2 | 0 | 0 | 0 |

|               |   |   |   |   |
|---------------|---|---|---|---|
| AK039826      | 2 | 0 | 0 | 0 |
| D6Mm5e        | 1 | 0 | 0 | 0 |
| Tprkb         | 3 | 0 | 0 | 0 |
| AK005503      | 3 | 0 | 0 | 0 |
| XLOC_027787   | 2 | 0 | 0 | 0 |
| XLOC_027812   | 1 | 0 | 0 | 0 |
| Ttll3         | 3 | 0 | 0 | 0 |
| XLOC_027885   | 4 | 0 | 0 | 0 |
| 3110021A11Rik | 1 | 0 | 0 | 0 |
| Slc6a13       | 8 | 0 | 0 | 0 |
| Cd163         | 4 | 0 | 0 | 0 |
| Spsb2         | 3 | 0 | 0 | 0 |
| XLOC_028022   | 1 | 0 | 0 | 0 |
| XLOC_028077   | 3 | 0 | 0 | 0 |
| XLOC_028101   | 1 | 0 | 0 | 0 |
| XLOC_028163   | 1 | 0 | 0 | 0 |
| AK020588      | 2 | 0 | 0 | 0 |
| Lsm5          | 3 | 0 | 0 | 0 |
| AK043607      | 3 | 0 | 0 | 0 |
| XLOC_028197   | 1 | 0 | 0 | 0 |
| AK038985      | 1 | 0 | 0 | 0 |
| Actg2         | 2 | 0 | 0 | 0 |
| XLOC_028267   | 2 | 0 | 0 | 0 |
| XLOC_028306   | 2 | 0 | 0 | 0 |
| Tada3         | 1 | 0 | 0 | 0 |
| 2510049J12Rik | 1 | 0 | 0 | 0 |
| Fxyd4         | 3 | 0 | 0 | 0 |
| Lrrc23        | 5 | 0 | 0 | 0 |
| Cd4           | 2 | 0 | 0 | 0 |
| Klrb1a        | 3 | 0 | 0 | 0 |
| BC035044      | 1 | 0 | 0 | 0 |
| AK016696      | 6 | 0 | 0 | 0 |
| XLOC_028465   | 1 | 0 | 0 | 0 |
| Sox5          | 4 | 0 | 0 | 0 |
| XLOC_027591   | 1 | 0 | 0 | 0 |
| Cpa2          | 1 | 0 | 0 | 0 |
| XLOC_027716   | 1 | 0 | 0 | 0 |
| Gm15534       | 1 | 0 | 0 | 0 |
| AW146020      | 1 | 0 | 0 | 0 |
| Alms1-ps1     | 1 | 0 | 0 | 0 |
| Gata2         | 1 | 0 | 0 | 0 |
| Trnt1         | 1 | 0 | 0 | 0 |
| XLOC_027904   | 3 | 0 | 0 | 0 |
| Nanogpd       | 1 | 0 | 0 | 0 |
| Clec4b1       | 1 | 0 | 0 | 0 |
| Clec9a        | 1 | 0 | 0 | 0 |
| XLOC_027991   | 1 | 0 | 0 | 0 |

|               |   |   |   |   |
|---------------|---|---|---|---|
| Pde3a         | 1 | 0 | 0 | 0 |
| AK143902      | 2 | 0 | 0 | 0 |
| XLOC_028041   | 1 | 0 | 0 | 0 |
| Gm15473       | 1 | 0 | 0 | 0 |
| Opn1sw        | 1 | 0 | 0 | 0 |
| XLOC_028093   | 2 | 0 | 0 | 0 |
| Clec5a        | 3 | 0 | 0 | 0 |
| XLOC_028158   | 2 | 0 | 0 | 0 |
| Hoxa1         | 1 | 0 | 0 | 0 |
| Wdr54         | 1 | 0 | 0 | 0 |
| Gt(ROSA)26Sor | 3 | 0 | 0 | 0 |
| AK038749      | 1 | 0 | 0 | 0 |
| Alox5         | 2 | 0 | 0 | 0 |
| XLOC_028369   | 1 | 0 | 0 | 0 |
| Clec12b       | 1 | 0 | 0 | 0 |
| Clec7a        | 2 | 0 | 0 | 0 |
| BC099571      | 1 | 0 | 0 | 0 |
| Klra2         | 3 | 0 | 0 | 0 |
| Foxp2         | 2 | 0 | 0 | 0 |
| BC021953      | 3 | 0 | 0 | 0 |
| XLOC_027649   | 1 | 0 | 0 | 0 |
| Slc4a5        | 1 | 0 | 0 | 0 |
| Nr2c2         | 1 | 0 | 0 | 0 |
| XLOC_027969   | 1 | 0 | 0 | 0 |
| BC049715      | 1 | 0 | 0 | 0 |
| XLOC_027996   | 1 | 0 | 0 | 0 |
| Far2          | 2 | 0 | 0 | 0 |
| XLOC_028042   | 1 | 0 | 0 | 0 |
| XLOC_028090   | 1 | 0 | 0 | 0 |
| XLOC_028122   | 1 | 0 | 0 | 0 |
| Igf2bp3       | 1 | 0 | 0 | 0 |
| okadin type I | 1 | 0 | 0 | 0 |
| Cidec         | 1 | 0 | 0 | 0 |
| Ghrl          | 1 | 0 | 0 | 0 |
| XLOC_027590   | 1 | 0 | 0 | 0 |
| Gm13846       | 1 | 0 | 0 | 0 |
| XLOC_027639   | 1 | 0 | 0 | 0 |
| AK016417      | 1 | 0 | 0 | 0 |
| Zfp398        | 1 | 0 | 0 | 0 |
| XLOC_027729   | 1 | 0 | 0 | 0 |
| M34473        | 1 | 0 | 0 | 0 |
| Gp9           | 1 | 0 | 0 | 0 |
| Slc6a12       | 1 | 0 | 0 | 0 |
| XLOC_027935   | 1 | 0 | 0 | 0 |
| Fgf23         | 1 | 0 | 0 | 0 |
| Clec1b        | 1 | 0 | 0 | 0 |
| AK045625      | 1 | 0 | 0 | 0 |

|               |    |   |   |   |
|---------------|----|---|---|---|
| XLOC_028007   | 1  | 0 | 0 | 0 |
| Mrps33        | 1  | 0 | 0 | 0 |
| XLOC_028221   | 1  | 0 | 0 | 0 |
| 4933424B01Rik | 2  | 0 | 0 | 0 |
| Myadm         | 4  | 0 | 0 | 0 |
| Prkcc         | 2  | 0 | 0 | 0 |
| Cacng7        | 4  | 0 | 0 | 0 |
| Cacng8        | 4  | 0 | 0 | 0 |
| Ndufa3        | 3  | 0 | 0 | 0 |
| Prpf31        | 3  | 0 | 0 | 0 |
| Rps9          | 5  | 0 | 0 | 0 |
| Leng8         | 8  | 0 | 0 | 0 |
| Lilra5        | 4  | 0 | 0 | 0 |
| Eps8l1        | 4  | 0 | 0 | 0 |
| Brsk1         | 4  | 0 | 0 | 0 |
| Suv420h2      | 8  | 0 | 0 | 0 |
| Rpl28         | 4  | 0 | 0 | 0 |
| Isoc2a        | 6  | 0 | 0 | 0 |
| Zfp628        | 5  | 0 | 0 | 0 |
| Nat14         | 4  | 0 | 0 | 0 |
| U2af2         | 7  | 0 | 0 | 0 |
| Epn1          | 11 | 0 | 0 | 0 |
| Zfp667        | 3  | 0 | 0 | 0 |
| AK038886      | 2  | 0 | 0 | 0 |
| Zfp78         | 7  | 0 | 0 | 0 |
| Zfp28         | 9  | 0 | 0 | 0 |
| Gm16532       | 2  | 0 | 0 | 0 |
| Zfp418        | 2  | 0 | 0 | 0 |
| Zfp606        | 2  | 0 | 0 | 0 |
| Zfp110        | 3  | 0 | 0 | 0 |
| Zfp128        | 1  | 0 | 0 | 0 |
| Rps5          | 4  | 0 | 0 | 0 |
| Zfp324        | 5  | 0 | 0 | 0 |
| Trim28        | 5  | 0 | 0 | 0 |
| Gm4879        | 1  | 0 | 0 | 0 |
| Lig1          | 4  | 0 | 0 | 0 |
| Kptn          | 2  | 0 | 0 | 0 |
| Meis3         | 3  | 0 | 0 | 0 |
| Zc3h4         | 6  | 0 | 0 | 0 |
| Tmem160       | 3  | 0 | 0 | 0 |
| XLOC_029499   | 4  | 0 | 0 | 0 |
| Ap2s1         | 1  | 0 | 0 | 0 |
| Slc1a5        | 3  | 0 | 0 | 0 |
| Strn4         | 5  | 0 | 0 | 0 |
| Prkd2         | 5  | 0 | 0 | 0 |
| Dact3         | 1  | 0 | 0 | 0 |
| Gng8          | 8  | 0 | 0 | 0 |

|               |    |   |   |   |
|---------------|----|---|---|---|
| Ptgir         | 3  | 0 | 0 | 0 |
| Pnmal1        | 2  | 0 | 0 | 0 |
| Psg16         | 3  | 0 | 0 | 0 |
| Mill2         | 7  | 0 | 0 | 0 |
| Nova2         | 1  | 0 | 0 | 0 |
| Myopop        | 4  | 0 | 0 | 0 |
| Sympk         | 5  | 0 | 0 | 0 |
| Dmwd          | 4  | 0 | 0 | 0 |
| Dmpk          | 11 | 0 | 0 | 0 |
| Six5          | 3  | 0 | 0 | 0 |
| Snrpd2        | 3  | 0 | 0 | 0 |
| Gpr4          | 1  | 0 | 0 | 0 |
| Opa3          | 1  | 0 | 0 | 0 |
| Rtn2          | 4  | 0 | 0 | 0 |
| Ercc1         | 2  | 0 | 0 | 0 |
| Exoc3l2       | 5  | 0 | 0 | 0 |
| Trappc6a      | 2  | 0 | 0 | 0 |
| Nkpd1         | 4  | 0 | 0 | 0 |
| Vmn1r183      | 1  | 0 | 0 | 0 |
| Zfp180        | 3  | 0 | 0 | 0 |
| Zfp235        | 4  | 0 | 0 | 0 |
| Kcnn4         | 3  | 0 | 0 | 0 |
| 1500002O20Rik | 7  | 0 | 0 | 0 |
| Irgq          | 2  | 0 | 0 | 0 |
| Xrcc1         | 2  | 0 | 0 | 0 |
| Ceacam10      | 3  | 0 | 0 | 0 |
| Gm9844        | 1  | 0 | 0 | 0 |
| Rps19         | 6  | 0 | 0 | 0 |
| Arhgef1       | 13 | 0 | 0 | 0 |
| XLOC_029563   | 1  | 0 | 0 | 0 |
| AK142847      | 1  | 0 | 0 | 0 |
| Zfp526        | 3  | 0 | 0 | 0 |
| Cic           | 11 | 0 | 0 | 0 |
| Tmem145       | 3  | 0 | 0 | 0 |
| Atp5sl        | 3  | 0 | 0 | 0 |
| B3gnt8        | 4  | 0 | 0 | 0 |
| Exosc5        | 1  | 0 | 0 | 0 |
| B9d2          | 1  | 0 | 0 | 0 |
| BC024978      | 1  | 0 | 0 | 0 |
| Numbl         | 3  | 0 | 0 | 0 |
| Blvrb         | 1  | 0 | 0 | 0 |
| Sertad3       | 2  | 0 | 0 | 0 |
| Sertad1       | 1  | 0 | 0 | 0 |
| Prx           | 3  | 0 | 0 | 0 |
| Ttc9b         | 2  | 0 | 0 | 0 |
| C030039L03Rik | 1  | 0 | 0 | 0 |
| Zfp60         | 4  | 0 | 0 | 0 |

|               |   |   |   |   |
|---------------|---|---|---|---|
| Gm10046       | 3 | 0 | 0 | 0 |
| Fbl           | 4 | 0 | 0 | 0 |
| Lrfr1         | 5 | 0 | 0 | 0 |
| Fbxo27        | 8 | 0 | 0 | 0 |
| Fbxo17        | 8 | 0 | 0 | 0 |
| Sars2         | 1 | 0 | 0 | 0 |
| Sirt2         | 6 | 0 | 0 | 0 |
| Hnrnp1        | 5 | 0 | 0 | 0 |
| Ech1          | 4 | 0 | 0 | 0 |
| Lgals4        | 2 | 0 | 0 | 0 |
| Lgals7        | 3 | 0 | 0 | 0 |
| Map4k1        | 5 | 0 | 0 | 0 |
| Yif1b         | 3 | 0 | 0 | 0 |
| Ppp1r14a      | 1 | 0 | 0 | 0 |
| Dpf1          | 9 | 0 | 0 | 0 |
| Zfp84         | 1 | 0 | 0 | 0 |
| Zfp790        | 6 | 0 | 0 | 0 |
| Zfp420        | 3 | 0 | 0 | 0 |
| AK155472      | 2 | 0 | 0 | 0 |
| AK138949      | 3 | 0 | 0 | 0 |
| Zfp568        | 2 | 0 | 0 | 0 |
| Zfp260        | 3 | 0 | 0 | 0 |
| Zfp382        | 6 | 0 | 0 | 0 |
| Gm5113        | 2 | 0 | 0 | 0 |
| Cox7a1        | 1 | 0 | 0 | 0 |
| Clip3         | 3 | 0 | 0 | 0 |
| Alkbh6        | 5 | 0 | 0 | 0 |
| Nfkbid        | 7 | 0 | 0 | 0 |
| Hspb6         | 2 | 0 | 0 | 0 |
| Tmem149       | 3 | 0 | 0 | 0 |
| U2af1l4       | 1 | 0 | 0 | 0 |
| AK049951      | 2 | 0 | 0 | 0 |
| AK133438      | 4 | 0 | 0 | 0 |
| XLOC_029648   | 1 | 0 | 0 | 0 |
| Gm12784       | 2 | 0 | 0 | 0 |
| XLOC_029650   | 5 | 0 | 0 | 0 |
| Gm12781       | 2 | 0 | 0 | 0 |
| Pepd          | 3 | 0 | 0 | 0 |
| Cebpa         | 1 | 0 | 0 | 0 |
| Ccdc123       | 6 | 0 | 0 | 0 |
| Tshz3         | 6 | 0 | 0 | 0 |
| 1600014C10Rik | 2 | 0 | 0 | 0 |
| AK034698      | 3 | 0 | 0 | 0 |
| XLOC_029663   | 3 | 0 | 0 | 0 |
| Zfp619        | 1 | 0 | 0 | 0 |
| XLOC_029665   | 8 | 0 | 0 | 0 |
| Gm6851        | 1 | 0 | 0 | 0 |

|               |    |   |   |   |
|---------------|----|---|---|---|
| AK163099      | 1  | 0 | 0 | 0 |
| AK011498      | 2  | 0 | 0 | 0 |
| Zfp788        | 12 | 0 | 0 | 0 |
| EU599041      | 1  | 0 | 0 | 0 |
| Siglec5       | 1  | 0 | 0 | 0 |
| Lim2          | 1  | 0 | 0 | 0 |
| Zfp719        | 2  | 0 | 0 | 0 |
| Ctu1          | 1  | 0 | 0 | 0 |
| Klk8          | 2  | 0 | 0 | 0 |
| 2410002F23Rik | 5  | 0 | 0 | 0 |
| Syt3          | 9  | 0 | 0 | 0 |
| Lrrc4b        | 3  | 0 | 0 | 0 |
| Aspdh         | 5  | 0 | 0 | 0 |
| Josd2         | 6  | 0 | 0 | 0 |
| AK017368      | 1  | 0 | 0 | 0 |
| Napsa         | 7  | 0 | 0 | 0 |
| XLOC_029699   | 1  | 0 | 0 | 0 |
| Vrk3          | 1  | 0 | 0 | 0 |
| Nup62         | 3  | 0 | 0 | 0 |
| Pnkp          | 2  | 0 | 0 | 0 |
| Fuz           | 1  | 0 | 0 | 0 |
| Irf3          | 5  | 0 | 0 | 0 |
| Rras          | 1  | 0 | 0 | 0 |
| Nosip         | 4  | 0 | 0 | 0 |
| Pih1d1        | 6  | 0 | 0 | 0 |
| Slc17a7       | 1  | 0 | 0 | 0 |
| Tead2         | 4  | 0 | 0 | 0 |
| XLOC_029715   | 2  | 0 | 0 | 0 |
| Rpl14-ps1     | 1  | 0 | 0 | 0 |
| Gys1          | 1  | 0 | 0 | 0 |
| Tulp2         | 1  | 0 | 0 | 0 |
| Plekha4       | 7  | 0 | 0 | 0 |
| Bcat2         | 3  | 0 | 0 | 0 |
| Rasip1        | 5  | 0 | 0 | 0 |
| Ntn5          | 6  | 0 | 0 | 0 |
| Car11         | 8  | 0 | 0 | 0 |
| Lmtk3         | 9  | 0 | 0 | 0 |
| AK133391      | 4  | 0 | 0 | 0 |
| Kdelr1        | 3  | 0 | 0 | 0 |
| Tmem143       | 3  | 0 | 0 | 0 |
| Ccdc114       | 9  | 0 | 0 | 0 |
| Nomo1         | 3  | 0 | 0 | 0 |
| Kcnc1         | 5  | 0 | 0 | 0 |
| Gtf2h1        | 1  | 0 | 0 | 0 |
| Ldha          | 4  | 0 | 0 | 0 |
| XLOC_029740   | 2  | 0 | 0 | 0 |
| XLOC_029742   | 3  | 0 | 0 | 0 |



|             |    |   |   |   |
|-------------|----|---|---|---|
| Zdhhc13     | 3  | 0 | 0 | 0 |
| Htati2      | 6  | 0 | 0 | 0 |
| Prmt3       | 5  | 0 | 0 | 0 |
| Nell1       | 2  | 0 | 0 | 0 |
| Ano5        | 1  | 0 | 0 | 0 |
| Slc17a6     | 5  | 0 | 0 | 0 |
| Gas2        | 2  | 0 | 0 | 0 |
| Gm6181      | 1  | 0 | 0 | 0 |
| XLOC_029755 | 1  | 0 | 0 | 0 |
| Luzp2       | 5  | 0 | 0 | 0 |
| Tubgcp5     | 1  | 0 | 0 | 0 |
| Cyfp1       | 2  | 0 | 0 | 0 |
| Herc2       | 5  | 0 | 0 | 0 |
| Gabrb3      | 4  | 0 | 0 | 0 |
| Ndn         | 1  | 0 | 0 | 0 |
| Otud7a      | 4  | 0 | 0 | 0 |
| XLOC_029771 | 11 | 0 | 0 | 0 |
| Mtmr10      | 5  | 0 | 0 | 0 |
| Mcee        | 5  | 0 | 0 | 0 |
| Apba2       | 11 | 0 | 0 | 0 |
| Tarsl2      | 4  | 0 | 0 | 0 |
| Tm2d3       | 2  | 0 | 0 | 0 |
| Pcsk6       | 4  | 0 | 0 | 0 |
| Snrpa1      | 2  | 0 | 0 | 0 |
| H47         | 1  | 0 | 0 | 0 |
| Chsy1       | 5  | 0 | 0 | 0 |
| Lins        | 1  | 0 | 0 | 0 |
| Lins2       | 6  | 0 | 0 | 0 |
| Ttc23       | 4  | 0 | 0 | 0 |
| Igf1r       | 2  | 0 | 0 | 0 |
| BC070425    | 7  | 0 | 0 | 0 |
| Rgma        | 3  | 0 | 0 | 0 |
| Fam174b     | 1  | 0 | 0 | 0 |
| Akap13      | 7  | 0 | 0 | 0 |
| Klhl25      | 4  | 0 | 0 | 0 |
| Agbl1       | 1  | 0 | 0 | 0 |
| Gm9885      | 1  | 0 | 0 | 0 |
| Mrps11      | 2  | 0 | 0 | 0 |
| Aen         | 3  | 0 | 0 | 0 |
| Abhd2       | 5  | 0 | 0 | 0 |
| Zfp710      | 5  | 0 | 0 | 0 |
| XLOC_029814 | 2  | 0 | 0 | 0 |
| Sema4b      | 3  | 0 | 0 | 0 |
| Ttll13      | 4  | 0 | 0 | 0 |
| Ngrn        | 2  | 0 | 0 | 0 |
| Vps33b      | 4  | 0 | 0 | 0 |
| Gm17257     | 1  | 0 | 0 | 0 |

|             |   |   |   |   |
|-------------|---|---|---|---|
| Zscan2      | 4 | 0 | 0 | 0 |
| Zfp592      | 4 | 0 | 0 | 0 |
| AK013794    | 7 | 0 | 0 | 0 |
| Whamm       | 5 | 0 | 0 | 0 |
| Fam103a1    | 4 | 0 | 0 | 0 |
| Tm6sf1      | 1 | 0 | 0 | 0 |
| Eftud1      | 3 | 0 | 0 | 0 |
| Tmc3        | 2 | 0 | 0 | 0 |
| Stard5      | 1 | 0 | 0 | 0 |
| Mesdc2      | 4 | 0 | 0 | 0 |
| AK199694    | 1 | 0 | 0 | 0 |
| Nox4        | 3 | 0 | 0 | 0 |
| Rab38       | 2 | 0 | 0 | 0 |
| Fzd4        | 1 | 0 | 0 | 0 |
| XLOC_029853 | 2 | 0 | 0 | 0 |
| Syt12       | 6 | 0 | 0 | 0 |
| Ccdc89      | 1 | 0 | 0 | 0 |
| BC051589    | 2 | 0 | 0 | 0 |
| Dlg2        | 5 | 0 | 0 | 0 |
| Ccdc90b     | 1 | 0 | 0 | 0 |
| Prcp        | 3 | 0 | 0 | 0 |
| Fam181b     | 1 | 0 | 0 | 0 |
| XLOC_029867 | 1 | 0 | 0 | 0 |
| Nars2       | 3 | 0 | 0 | 0 |
| Gab2        | 2 | 0 | 0 | 0 |
| Kctd21      | 4 | 0 | 0 | 0 |
| Ndufc2      | 1 | 0 | 0 | 0 |
| Ints4       | 6 | 0 | 0 | 0 |
| Rsf1        | 3 | 0 | 0 | 0 |
| Clns1a      | 1 | 0 | 0 | 0 |
| Prkrir      | 5 | 0 | 0 | 0 |
| XLOC_029881 | 7 | 0 | 0 | 0 |
| Wnt11       | 4 | 0 | 0 | 0 |
| Mtap6       | 3 | 0 | 0 | 0 |
| Gdpd5       | 7 | 0 | 0 | 0 |
| Klhl35      | 1 | 0 | 0 | 0 |
| Arrb1       | 9 | 0 | 0 | 0 |
| Lipt2       | 1 | 0 | 0 | 0 |
| Kcne3       | 1 | 0 | 0 | 0 |
| Pgm2l1      | 4 | 0 | 0 | 0 |
| P4ha3       | 3 | 0 | 0 | 0 |
| C2cd3       | 3 | 0 | 0 | 0 |
| Ucp2        | 3 | 0 | 0 | 0 |
| Chchd8      | 1 | 0 | 0 | 0 |
| Fam168a     | 3 | 0 | 0 | 0 |
| Fchsd2      | 4 | 0 | 0 | 0 |
| Stard10     | 1 | 0 | 0 | 0 |

|               |   |   |   |   |
|---------------|---|---|---|---|
| Arap1         | 4 | 0 | 0 | 0 |
| Pde2a         | 5 | 0 | 0 | 0 |
| Clpb          | 7 | 0 | 0 | 0 |
| 2400001E08Rik | 5 | 0 | 0 | 0 |
| Numa1         | 8 | 0 | 0 | 0 |
| Pgap2         | 6 | 0 | 0 | 0 |
| Stim1         | 7 | 0 | 0 | 0 |
| Rrm1          | 2 | 0 | 0 | 0 |
| Trim6         | 7 | 0 | 0 | 0 |
| Trim34a       | 6 | 0 | 0 | 0 |
| Trim34        | 1 | 0 | 0 | 0 |
| Gm4887        | 1 | 0 | 0 | 0 |
| Smpd1         | 1 | 0 | 0 | 0 |
| Fxc1          | 3 | 0 | 0 | 0 |
| Ilk           | 3 | 0 | 0 | 0 |
| Syt9          | 5 | 0 | 0 | 0 |
| Olfml1        | 2 | 0 | 0 | 0 |
| Gm10156       | 1 | 0 | 0 | 0 |
| Eif3f         | 1 | 0 | 0 | 0 |
| AK007082      | 2 | 0 | 0 | 0 |
| D930014E17Rik | 2 | 0 | 0 | 0 |
| Ipo7          | 3 | 0 | 0 | 0 |
| Zfp143        | 4 | 0 | 0 | 0 |
| Wee1          | 2 | 0 | 0 | 0 |
| Swap70        | 3 | 0 | 0 | 0 |
| Adm           | 2 | 0 | 0 | 0 |
| Ampd3         | 6 | 0 | 0 | 0 |
| Ctr9          | 3 | 0 | 0 | 0 |
| Usp47         | 5 | 0 | 0 | 0 |
| Parva         | 2 | 0 | 0 | 0 |
| Rassf10       | 1 | 0 | 0 | 0 |
| Far1          | 4 | 0 | 0 | 0 |
| Spon1         | 1 | 0 | 0 | 0 |
| Pde3b         | 2 | 0 | 0 | 0 |
| AK045786      | 8 | 0 | 0 | 0 |
| 6330503K22Rik | 5 | 0 | 0 | 0 |
| 9030624J02Rik | 5 | 0 | 0 | 0 |
| Gm5601        | 1 | 0 | 0 | 0 |
| Uqcrc2        | 2 | 0 | 0 | 0 |
| BC030336      | 3 | 0 | 0 | 0 |
| Vwa3a         | 5 | 0 | 0 | 0 |
| Eef2k         | 3 | 0 | 0 | 0 |
| Polr3e        | 6 | 0 | 0 | 0 |
| Mettl9        | 4 | 0 | 0 | 0 |
| Otoa          | 2 | 0 | 0 | 0 |
| Hs3st2        | 6 | 0 | 0 | 0 |
| Ubfd1         | 2 | 0 | 0 | 0 |

|               |    |   |   |   |
|---------------|----|---|---|---|
| XLOC_029981   | 2  | 0 | 0 | 0 |
| Dctn5         | 1  | 0 | 0 | 0 |
| Plk1          | 7  | 0 | 0 | 0 |
| 2010110P09Rik | 5  | 0 | 0 | 0 |
| Cacng3        | 1  | 0 | 0 | 0 |
| Rbbp6         | 8  | 0 | 0 | 0 |
| Tnrc6a        | 7  | 0 | 0 | 0 |
| Slc5a11       | 13 | 0 | 0 | 0 |
| Lcmt1         | 1  | 0 | 0 | 0 |
| XLOC_029992   | 4  | 0 | 0 | 0 |
| Jmjd5         | 4  | 0 | 0 | 0 |
| Il4ra         | 2  | 0 | 0 | 0 |
| Sbk1          | 3  | 0 | 0 | 0 |
| Tufm          | 5  | 0 | 0 | 0 |
| Apob48r       | 3  | 0 | 0 | 0 |
| Ypel3         | 3  | 0 | 0 | 0 |
| Fam57b        | 2  | 0 | 0 | 0 |
| Sez6l2        | 10 | 0 | 0 | 0 |
| Cdipt         | 2  | 0 | 0 | 0 |
| AI467606      | 1  | 0 | 0 | 0 |
| Mylpf         | 3  | 0 | 0 | 0 |
| Zfp553        | 2  | 0 | 0 | 0 |
| Zfp771        | 2  | 0 | 0 | 0 |
| Itgal         | 4  | 0 | 0 | 0 |
| AK045290      | 2  | 0 | 0 | 0 |
| Prr14         | 7  | 0 | 0 | 0 |
| Fbrs          | 5  | 0 | 0 | 0 |
| Phkg2         | 4  | 0 | 0 | 0 |
| Rnf40         | 4  | 0 | 0 | 0 |
| Ctf1          | 4  | 0 | 0 | 0 |
| Fbxl19        | 10 | 0 | 0 | 0 |
| XLOC_030025   | 2  | 0 | 0 | 0 |
| Stx4a         | 2  | 0 | 0 | 0 |
| Zfp646        | 5  | 0 | 0 | 0 |
| Bckdk         | 4  | 0 | 0 | 0 |
| Fus           | 7  | 0 | 0 | 0 |
| Trim72        | 6  | 0 | 0 | 0 |
| Itgax         | 5  | 0 | 0 | 0 |
| Armc5         | 1  | 0 | 0 | 0 |
| Tgfb1i1       | 4  | 0 | 0 | 0 |
| Bag3          | 1  | 0 | 0 | 0 |
| Inpp5f        | 4  | 0 | 0 | 0 |
| Ppapdc1a      | 6  | 0 | 0 | 0 |
| Wdr11         | 3  | 0 | 0 | 0 |
| Tacc2         | 9  | 0 | 0 | 0 |
| Htra1         | 6  | 0 | 0 | 0 |
| Acadsb        | 2  | 0 | 0 | 0 |

|               |    |   |   |   |
|---------------|----|---|---|---|
| Bub3          | 2  | 0 | 0 | 0 |
| Gpr26         | 1  | 0 | 0 | 0 |
| XLOC_030053   | 7  | 0 | 0 | 0 |
| Fam175b       | 2  | 0 | 0 | 0 |
| Zranb1        | 5  | 0 | 0 | 0 |
| 2700050L05Rik | 4  | 0 | 0 | 0 |
| Bccip         | 1  | 0 | 0 | 0 |
| XLOC_030060   | 2  | 0 | 0 | 0 |
| Dock1         | 3  | 0 | 0 | 0 |
| XLOC_030062   | 6  | 0 | 0 | 0 |
| Ptpre         | 5  | 0 | 0 | 0 |
| Mgmt          | 4  | 0 | 0 | 0 |
| Glr3          | 9  | 0 | 0 | 0 |
| XLOC_030066   | 4  | 0 | 0 | 0 |
| XLOC_030067   | 3  | 0 | 0 | 0 |
| Dpysl4        | 5  | 0 | 0 | 0 |
| Pwwp2b        | 3  | 0 | 0 | 0 |
| Kndc1         | 3  | 0 | 0 | 0 |
| Zfp511        | 1  | 0 | 0 | 0 |
| Cyp2e1        | 1  | 0 | 0 | 0 |
| Ric8          | 2  | 0 | 0 | 0 |
| Psm13         | 1  | 0 | 0 | 0 |
| Ath11         | 6  | 0 | 0 | 0 |
| Ifitm1        | 2  | 0 | 0 | 0 |
| Pkp3          | 5  | 0 | 0 | 0 |
| Ptdss2        | 1  | 0 | 0 | 0 |
| Lrrc56        | 6  | 0 | 0 | 0 |
| Rassf7        | 6  | 0 | 0 | 0 |
| Phrf1         | 6  | 0 | 0 | 0 |
| Taldo1        | 3  | 0 | 0 | 0 |
| Gm4535        | 1  | 0 | 0 | 0 |
| Rplp2         | 9  | 0 | 0 | 0 |
| Efcab4a       | 2  | 0 | 0 | 0 |
| Ap2a2         | 5  | 0 | 0 | 0 |
| Muc2          | 4  | 0 | 0 | 0 |
| Brsk2         | 7  | 0 | 0 | 0 |
| Lsp1          | 7  | 0 | 0 | 0 |
| Cd81          | 6  | 0 | 0 | 0 |
| Slc22a18      | 2  | 0 | 0 | 0 |
| Shank2        | 6  | 0 | 0 | 0 |
| Fgf3          | 3  | 0 | 0 | 0 |
| Oraov1        | 2  | 0 | 0 | 0 |
| Mrgprd        | 2  | 0 | 0 | 0 |
| Tfpt          | 3  | 0 | 0 | 0 |
| Mboat7        | 6  | 0 | 0 | 0 |
| Lilrb3        | 11 | 0 | 0 | 0 |
| 9430041J12Rik | 2  | 0 | 0 | 0 |

|               |    |   |   |   |
|---------------|----|---|---|---|
| Rdh13         | 9  | 0 | 0 | 0 |
| Ppp1r12c      | 4  | 0 | 0 | 0 |
| Tnnt1         | 2  | 0 | 0 | 0 |
| 6030429G01Rik | 10 | 0 | 0 | 0 |
| Syt5          | 3  | 0 | 0 | 0 |
| Ppp6r1        | 9  | 0 | 0 | 0 |
| Hspbp1        | 3  | 0 | 0 | 0 |
| Cox6b2        | 5  | 0 | 0 | 0 |
| 2210411K11Rik | 1  | 0 | 0 | 0 |
| Shisa7        | 5  | 0 | 0 | 0 |
| Zfp579        | 5  | 0 | 0 | 0 |
| Fiz1          | 2  | 0 | 0 | 0 |
| Zfp784        | 1  | 0 | 0 | 0 |
| AK080857      | 3  | 0 | 0 | 0 |
| Rasl2-9-ps    | 1  | 0 | 0 | 0 |
| Zfp583        | 5  | 0 | 0 | 0 |
| Zim1          | 2  | 0 | 0 | 0 |
| Peg3          | 4  | 0 | 0 | 0 |
| Zfp954        | 1  | 0 | 0 | 0 |
| Clcn4-2       | 7  | 0 | 0 | 0 |
| Zik1          | 1  | 0 | 0 | 0 |
| Znf551        | 1  | 0 | 0 | 0 |
| Zfp551        | 2  | 0 | 0 | 0 |
| XLOC_030169   | 2  | 0 | 0 | 0 |
| Zbtb45        | 4  | 0 | 0 | 0 |
| Ube2m         | 9  | 0 | 0 | 0 |
| Mzf1          | 7  | 0 | 0 | 0 |
| Vmn1r85       | 1  | 0 | 0 | 0 |
| 6330408A02Rik | 5  | 0 | 0 | 0 |
| Gltscr2       | 3  | 0 | 0 | 0 |
| Gltscr1       | 5  | 0 | 0 | 0 |
| Dhx34         | 5  | 0 | 0 | 0 |
| Ccdc9         | 9  | 0 | 0 | 0 |
| Npas1         | 2  | 0 | 0 | 0 |
| Grif1         | 1  | 0 | 0 | 0 |
| Fkrp          | 4  | 0 | 0 | 0 |
| 9330104G04Rik | 2  | 0 | 0 | 0 |
| Calm3         | 6  | 0 | 0 | 0 |
| Ppp5c         | 1  | 0 | 0 | 0 |
| XLOC_030200   | 1  | 0 | 0 | 0 |
| XLOC_030199   | 1  | 0 | 0 | 0 |
| Ccdc61        | 5  | 0 | 0 | 0 |
| Qpctl         | 6  | 0 | 0 | 0 |
| Vasp          | 4  | 0 | 0 | 0 |
| Ppm1n         | 1  | 0 | 0 | 0 |
| Cd3eap        | 1  | 0 | 0 | 0 |
| AK020867      | 2  | 0 | 0 | 0 |

|               |    |   |   |   |
|---------------|----|---|---|---|
| Mark4         | 6  | 0 | 0 | 0 |
| Lrrc68        | 6  | 0 | 0 | 0 |
| Gemin7        | 2  | 0 | 0 | 0 |
| Relb          | 4  | 0 | 0 | 0 |
| Clptm1        | 2  | 0 | 0 | 0 |
| Apoc1         | 2  | 0 | 0 | 0 |
| Pvrl2         | 4  | 0 | 0 | 0 |
| Bcam          | 6  | 0 | 0 | 0 |
| Cblc          | 1  | 0 | 0 | 0 |
| Bcl3          | 5  | 0 | 0 | 0 |
| Pvr           | 2  | 0 | 0 | 0 |
| Zfp61         | 6  | 0 | 0 | 0 |
| Zfp575        | 3  | 0 | 0 | 0 |
| Rabac1        | 1  | 0 | 0 | 0 |
| Pou2f2        | 6  | 0 | 0 | 0 |
| Flame-3       | 1  | 0 | 0 | 0 |
| Dedd2         | 5  | 0 | 0 | 0 |
| Gsk3a         | 6  | 0 | 0 | 0 |
| Pafah1b3      | 3  | 0 | 0 | 0 |
| Lipe          | 3  | 0 | 0 | 0 |
| Ceacam1       | 5  | 0 | 0 | 0 |
| Ceacam2       | 2  | 0 | 0 | 0 |
| Bckdha        | 1  | 0 | 0 | 0 |
| Tmem91        | 3  | 0 | 0 | 0 |
| Ccdc97        | 5  | 0 | 0 | 0 |
| Hnrnpul1      | 5  | 0 | 0 | 0 |
| Axl           | 7  | 0 | 0 | 0 |
| Egln2         | 6  | 0 | 0 | 0 |
| Rab4b         | 4  | 0 | 0 | 0 |
| Mia1          | 1  | 0 | 0 | 0 |
| Snrpa         | 2  | 0 | 0 | 0 |
| Ltbp4         | 3  | 0 | 0 | 0 |
| Pld3          | 4  | 0 | 0 | 0 |
| Map3k10       | 6  | 0 | 0 | 0 |
| Zfp780b       | 5  | 0 | 0 | 0 |
| Psmc4         | 1  | 0 | 0 | 0 |
| BC089491      | 2  | 0 | 0 | 0 |
| Timm50        | 2  | 0 | 0 | 0 |
| Supt5h        | 9  | 0 | 0 | 0 |
| Plekhg2       | 10 | 0 | 0 | 0 |
| Zfp36         | 1  | 0 | 0 | 0 |
| Samd4b        | 2  | 0 | 0 | 0 |
| Nccrp1        | 1  | 0 | 0 | 0 |
| Pak4          | 7  | 0 | 0 | 0 |
| C330005M16Rik | 3  | 0 | 0 | 0 |
| Mrps12        | 2  | 0 | 0 | 0 |
| Nfkbib        | 2  | 0 | 0 | 0 |

|               |    |   |   |   |
|---------------|----|---|---|---|
| Eif3k         | 2  | 0 | 0 | 0 |
| Ryr1          | 5  | 0 | 0 | 0 |
| Fam98c        | 7  | 0 | 0 | 0 |
| Spred3        | 1  | 0 | 0 | 0 |
| Psmc8         | 2  | 0 | 0 | 0 |
| 2200002D01Rik | 1  | 0 | 0 | 0 |
| Spint2        | 1  | 0 | 0 | 0 |
| Zfp940        | 2  | 0 | 0 | 0 |
| Zfp27         | 5  | 0 | 0 | 0 |
| XLOC_030295   | 1  | 0 | 0 | 0 |
| Zfp14         | 9  | 0 | 0 | 0 |
| Zfp82         | 5  | 0 | 0 | 0 |
| Zfp566        | 1  | 0 | 0 | 0 |
| Zfp146        | 3  | 0 | 0 | 0 |
| Capns1        | 7  | 0 | 0 | 0 |
| Tbcb          | 4  | 0 | 0 | 0 |
| Lrfr3         | 1  | 0 | 0 | 0 |
| Aplp1         | 2  | 0 | 0 | 0 |
| Arhgap33      | 9  | 0 | 0 | 0 |
| BC053749      | 5  | 0 | 0 | 0 |
| Wbp7          | 7  | 0 | 0 | 0 |
| Zbtb32        | 5  | 0 | 0 | 0 |
| Cox6b1        | 2  | 0 | 0 | 0 |
| Tmem147       | 4  | 0 | 0 | 0 |
| Mag           | 2  | 0 | 0 | 0 |
| Usf2          | 11 | 0 | 0 | 0 |
| Fxyd5         | 10 | 0 | 0 | 0 |
| Fxyd1         | 4  | 0 | 0 | 0 |
| Hpn           | 10 | 0 | 0 | 0 |
| Gramd1a       | 6  | 0 | 0 | 0 |
| Wtip          | 3  | 0 | 0 | 0 |
| Uba2          | 1  | 0 | 0 | 0 |
| Pdcd2l        | 1  | 0 | 0 | 0 |
| Gpi1          | 8  | 0 | 0 | 0 |
| 4931406P16Rik | 6  | 0 | 0 | 0 |
| Lsm14a        | 5  | 0 | 0 | 0 |
| Kctd15        | 4  | 0 | 0 | 0 |
| Cebpg         | 3  | 0 | 0 | 0 |
| Lrp3          | 3  | 0 | 0 | 0 |
| Gpatch1       | 1  | 0 | 0 | 0 |
| C230052I12Rik | 1  | 0 | 0 | 0 |
| Nudt19        | 1  | 0 | 0 | 0 |
| Pdcd5         | 8  | 0 | 0 | 0 |
| Dpy19l3       | 1  | 0 | 0 | 0 |
| Zfp507        | 7  | 0 | 0 | 0 |
| Zfp536        | 3  | 0 | 0 | 0 |
| C80913        | 8  | 0 | 0 | 0 |



|               |   |   |   |   |
|---------------|---|---|---|---|
| Ccne1         | 1 | 0 | 0 | 0 |
| Plekhf1       | 1 | 0 | 0 | 0 |
| Pop4          | 7 | 0 | 0 | 0 |
| Gm6872        | 1 | 0 | 0 | 0 |
| RP23-147O14.6 | 1 | 0 | 0 | 0 |
| BC063263      | 6 | 0 | 0 | 0 |
| Gm5595        | 4 | 0 | 0 | 0 |
| Gm9294        | 1 | 0 | 0 | 0 |
| Zfp715        | 6 | 0 | 0 | 0 |
| Iglon5        | 2 | 0 | 0 | 0 |
| Cd33          | 5 | 0 | 0 | 0 |
| Siglece       | 6 | 0 | 0 | 0 |
| AK134755      | 9 | 0 | 0 | 0 |
| 1700008O03Rik | 7 | 0 | 0 | 0 |
| 2310044H10Rik | 4 | 0 | 0 | 0 |
| Mybpc2        | 3 | 0 | 0 | 0 |
| Pold1         | 5 | 0 | 0 | 0 |
| Nr1h2         | 5 | 0 | 0 | 0 |
| Myh14         | 6 | 0 | 0 | 0 |
| Atf5          | 3 | 0 | 0 | 0 |
| Tbc1d17       | 3 | 0 | 0 | 0 |
| Ptov1         | 7 | 0 | 0 | 0 |
| Med25         | 2 | 0 | 0 | 0 |
| Ap2a1         | 7 | 0 | 0 | 0 |
| Cpt1c         | 5 | 0 | 0 | 0 |
| Prmt1         | 5 | 0 | 0 | 0 |
| Bcl2l12       | 2 | 0 | 0 | 0 |
| Scaf1         | 7 | 0 | 0 | 0 |
| Prr12         | 7 | 0 | 0 | 0 |
| Rcn3          | 3 | 0 | 0 | 0 |
| Fcgrt         | 3 | 0 | 0 | 0 |
| Rps11         | 4 | 0 | 0 | 0 |
| Aldh16a1      | 1 | 0 | 0 | 0 |
| Ccdc155       | 9 | 0 | 0 | 0 |
| Dkk1          | 3 | 0 | 0 | 0 |
| Cd37          | 6 | 0 | 0 | 0 |
| Ppfia3        | 4 | 0 | 0 | 0 |
| Snrnp70       | 5 | 0 | 0 | 0 |
| Ruvbl2        | 5 | 0 | 0 | 0 |
| Ftl1          | 3 | 0 | 0 | 0 |
| Bax           | 4 | 0 | 0 | 0 |
| Dhdh          | 4 | 0 | 0 | 0 |
| Nucb1         | 5 | 0 | 0 | 0 |
| Ppp1r15a      | 1 | 0 | 0 | 0 |
| AK049852      | 2 | 0 | 0 | 0 |
| Fut2          | 1 | 0 | 0 | 0 |
| Sphk2         | 4 | 0 | 0 | 0 |

|               |    |   |   |   |
|---------------|----|---|---|---|
| Cyth2         | 4  | 0 | 0 | 0 |
| Grwd1         | 4  | 0 | 0 | 0 |
| Grin2d        | 5  | 0 | 0 | 0 |
| Syngn4        | 1  | 0 | 0 | 0 |
| Emp3          | 1  | 0 | 0 | 0 |
| Kcnj11        | 1  | 0 | 0 | 0 |
| Sergef        | 7  | 0 | 0 | 0 |
| Saal1         | 3  | 0 | 0 | 0 |
| Hps5          | 6  | 0 | 0 | 0 |
| Uevld         | 4  | 0 | 0 | 0 |
| Spty2d1       | 1  | 0 | 0 | 0 |
| Ptpn5         | 4  | 0 | 0 | 0 |
| XLOC_030426   | 1  | 0 | 0 | 0 |
| Mrgpra9       | 2  | 0 | 0 | 0 |
| XLOC_030427   | 3  | 0 | 0 | 0 |
| Mrgprx1       | 3  | 0 | 0 | 0 |
| Svip          | 1  | 0 | 0 | 0 |
| Nipa2         | 1  | 0 | 0 | 0 |
| Nipa1         | 1  | 0 | 0 | 0 |
| Snrpn         | 12 | 0 | 0 | 0 |
| XLOC_030460   | 5  | 0 | 0 | 0 |
| DOKist4       | 1  | 0 | 0 | 0 |
| A230057D06Rik | 4  | 0 | 0 | 0 |
| AK086712      | 3  | 0 | 0 | 0 |
| Mkrn3         | 1  | 0 | 0 | 0 |
| Chrna7        | 2  | 0 | 0 | 0 |
| Fan1          | 6  | 0 | 0 | 0 |
| Mphosph10     | 2  | 0 | 0 | 0 |
| Fam189a1      | 2  | 0 | 0 | 0 |
| XLOC_030477   | 1  | 0 | 0 | 0 |
| Asb7          | 4  | 0 | 0 | 0 |
| XLOC_030481   | 1  | 0 | 0 | 0 |
| AK038598      | 8  | 0 | 0 | 0 |
| Mef2a         | 7  | 0 | 0 | 0 |
| Lrrc28        | 5  | 0 | 0 | 0 |
| Synm          | 4  | 0 | 0 | 0 |
| AK014683      | 3  | 0 | 0 | 0 |
| Arrdc4        | 2  | 0 | 0 | 0 |
| AK049871      | 3  | 0 | 0 | 0 |
| Nr2f2         | 3  | 0 | 0 | 0 |
| Mctp2         | 10 | 0 | 0 | 0 |
| Gm10294       | 1  | 0 | 0 | 0 |
| Chd2          | 8  | 0 | 0 | 0 |
| Slco3a1       | 1  | 0 | 0 | 0 |
| Sv2b          | 8  | 0 | 0 | 0 |
| XLOC_030503   | 1  | 0 | 0 | 0 |
| Ntrk3         | 5  | 0 | 0 | 0 |

|               |    |   |   |   |
|---------------|----|---|---|---|
| Mrpl46        | 2  | 0 | 0 | 0 |
| Det1          | 6  | 0 | 0 | 0 |
| Mfge8         | 3  | 0 | 0 | 0 |
| Rlbp1         | 4  | 0 | 0 | 0 |
| Polg          | 6  | 0 | 0 | 0 |
| Kif7          | 10 | 0 | 0 | 0 |
| Pex11a        | 3  | 0 | 0 | 0 |
| Anpep         | 4  | 0 | 0 | 0 |
| Idh2          | 4  | 0 | 0 | 0 |
| Cib1          | 3  | 0 | 0 | 0 |
| Unc45a        | 10 | 0 | 0 | 0 |
| Man2a2        | 4  | 0 | 0 | 0 |
| Fes           | 8  | 0 | 0 | 0 |
| Furin         | 4  | 0 | 0 | 0 |
| Crtc3         | 2  | 0 | 0 | 0 |
| Iqgap1        | 5  | 0 | 0 | 0 |
| Sec11a        | 3  | 0 | 0 | 0 |
| XLOC_030530   | 7  | 0 | 0 | 0 |
| Gm7180        | 1  | 0 | 0 | 0 |
| Cpeb1         | 10 | 0 | 0 | 0 |
| Ap3b2         | 3  | 0 | 0 | 0 |
| Homer2        | 2  | 0 | 0 | 0 |
| vesl-2        | 3  | 0 | 0 | 0 |
| 3110040N11Rik | 5  | 0 | 0 | 0 |
| Btbd1         | 6  | 0 | 0 | 0 |
| Hdgfrp3       | 4  | 0 | 0 | 0 |
| Fam154b       | 4  | 0 | 0 | 0 |
| AK042300      | 4  | 0 | 0 | 0 |
| 9930013L23Rik | 5  | 0 | 0 | 0 |
| Fam108c       | 1  | 0 | 0 | 0 |
| Arnt2         | 6  | 0 | 0 | 0 |
| Fah           | 6  | 0 | 0 | 0 |
| Zfand6        | 6  | 0 | 0 | 0 |
| Folh1         | 6  | 0 | 0 | 0 |
| Tmem135       | 3  | 0 | 0 | 0 |
| Prss23        | 5  | 0 | 0 | 0 |
| I7Rn6         | 2  | 0 | 0 | 0 |
| Eed           | 2  | 0 | 0 | 0 |
| Ccdc83        | 1  | 0 | 0 | 0 |
| Tmem126a      | 2  | 0 | 0 | 0 |
| Tmem126b      | 1  | 0 | 0 | 0 |
| Ankrd42       | 7  | 0 | 0 | 0 |
| 4632434I11Rik | 1  | 0 | 0 | 0 |
| Usp35         | 3  | 0 | 0 | 0 |
| Thrsp         | 1  | 0 | 0 | 0 |
| 1810020D17Rik | 3  | 0 | 0 | 0 |
| Aqp11         | 1  | 0 | 0 | 0 |

|               |   |   |   |   |
|---------------|---|---|---|---|
| Capn5         | 8 | 0 | 0 | 0 |
| B3gnt6        | 1 | 0 | 0 | 0 |
| Acer3         | 2 | 0 | 0 | 0 |
| 2210018M11Rik | 7 | 0 | 0 | 0 |
| AK052909      | 3 | 0 | 0 | 0 |
| Uvrag         | 3 | 0 | 0 | 0 |
| Dgat2         | 3 | 0 | 0 | 0 |
| Serpinh1      | 3 | 0 | 0 | 0 |
| Rps3          | 2 | 0 | 0 | 0 |
| Neu3          | 3 | 0 | 0 | 0 |
| Spcs2         | 2 | 0 | 0 | 0 |
| Rnf169        | 7 | 0 | 0 | 0 |
| Pold3         | 6 | 0 | 0 | 0 |
| Ppme1         | 2 | 0 | 0 | 0 |
| Dnajb13       | 2 | 0 | 0 | 0 |
| Plekhb1       | 4 | 0 | 0 | 0 |
| Relt          | 8 | 0 | 0 | 0 |
| Arhgef17      | 4 | 0 | 0 | 0 |
| P2ry2         | 5 | 0 | 0 | 0 |
| Gm7027        | 1 | 0 | 0 | 0 |
| Inpp1         | 9 | 0 | 0 | 0 |
| Folr2         | 2 | 0 | 0 | 0 |
| Rnf121        | 3 | 0 | 0 | 0 |
| Chrna10       | 3 | 0 | 0 | 0 |
| Nup98         | 6 | 0 | 0 | 0 |
| Rhog          | 2 | 0 | 0 | 0 |
| Trim21        | 3 | 0 | 0 | 0 |
| Beta-s        | 1 | 0 | 0 | 0 |
| Trim5         | 2 | 0 | 0 | 0 |
| Trim12a       | 4 | 0 | 0 | 0 |
| 9230105E10Rik | 5 | 0 | 0 | 0 |
| Trim30a       | 9 | 0 | 0 | 0 |
| Gm16464       | 1 | 0 | 0 | 0 |
| Fam160a2      | 6 | 0 | 0 | 0 |
| Prkcdbp       | 1 | 0 | 0 | 0 |
| Apbb1         | 9 | 0 | 0 | 0 |
| Trim3         | 2 | 0 | 0 | 0 |
| Arfip2        | 3 | 0 | 0 | 0 |
| Mrpl17        | 3 | 0 | 0 | 0 |
| Cyb5r2        | 6 | 0 | 0 | 0 |
| Ric3          | 3 | 0 | 0 | 0 |
| Lmo1          | 5 | 0 | 0 | 0 |
| St5           | 9 | 0 | 0 | 0 |
| Tmem9b        | 1 | 0 | 0 | 0 |
| Nrip3         | 3 | 0 | 0 | 0 |
| Scube2        | 2 | 0 | 0 | 0 |
| Dennd5a       | 5 | 0 | 0 | 0 |

|               |    |   |   |   |
|---------------|----|---|---|---|
| Sbf2          | 9  | 0 | 0 | 0 |
| Rnf141        | 6  | 0 | 0 | 0 |
| Lyve1         | 2  | 0 | 0 | 0 |
| Mrvi1         | 4  | 0 | 0 | 0 |
| Eif4g2        | 9  | 0 | 0 | 0 |
| Galntl4       | 6  | 0 | 0 | 0 |
| Dkk3          | 4  | 0 | 0 | 0 |
| Btbd10        | 4  | 0 | 0 | 0 |
| Copb1         | 2  | 0 | 0 | 0 |
| Psm1          | 2  | 0 | 0 | 0 |
| XLOC_030665   | 2  | 0 | 0 | 0 |
| Calca         | 12 | 0 | 0 | 0 |
| Sox6          | 4  | 0 | 0 | 0 |
| Gm4353        | 1  | 0 | 0 | 0 |
| Rps13         | 2  | 0 | 0 | 0 |
| Rps15a        | 5  | 0 | 0 | 0 |
| Arl6ip1       | 2  | 0 | 0 | 0 |
| Itpr12        | 1  | 0 | 0 | 0 |
| Coq7          | 2  | 0 | 0 | 0 |
| Tmc7          | 3  | 0 | 0 | 0 |
| Gde1          | 6  | 0 | 0 | 0 |
| 2310008H09Rik | 4  | 0 | 0 | 0 |
| Gprc5b        | 4  | 0 | 0 | 0 |
| Gpr139        | 4  | 0 | 0 | 0 |
| XLOC_030686   | 9  | 0 | 0 | 0 |
| Thumpd1       | 1  | 0 | 0 | 0 |
| Eri2          | 6  | 0 | 0 | 0 |
| Dcun1d3       | 3  | 0 | 0 | 0 |
| Crym          | 2  | 0 | 0 | 0 |
| Cdr2          | 1  | 0 | 0 | 0 |
| Usp31         | 4  | 0 | 0 | 0 |
| Cog7          | 1  | 0 | 0 | 0 |
| Gga2          | 1  | 0 | 0 | 0 |
| Ndufab1       | 6  | 0 | 0 | 0 |
| Palb2         | 7  | 0 | 0 | 0 |
| Ern2          | 2  | 0 | 0 | 0 |
| Arhgap17      | 7  | 0 | 0 | 0 |
| Zkscan2       | 6  | 0 | 0 | 0 |
| Nsmce1        | 7  | 0 | 0 | 0 |
| Gtf3c1        | 6  | 0 | 0 | 0 |
| Gsg1l         | 2  | 0 | 0 | 0 |
| Xpo6          | 8  | 0 | 0 | 0 |
| Spns1         | 3  | 0 | 0 | 0 |
| Sh2b1         | 8  | 0 | 0 | 0 |
| Atxn2l        | 11 | 0 | 0 | 0 |
| Eif3c         | 3  | 0 | 0 | 0 |
| Cln3          | 6  | 0 | 0 | 0 |

|               |    |   |   |   |
|---------------|----|---|---|---|
| Nupr1         | 2  | 0 | 0 | 0 |
| Coro1a        | 6  | 0 | 0 | 0 |
| Ppp4c         | 2  | 0 | 0 | 0 |
| Taok2         | 6  | 0 | 0 | 0 |
| Mvp           | 8  | 0 | 0 | 0 |
| Qprt          | 3  | 0 | 0 | 0 |
| Cd2bp2        | 6  | 0 | 0 | 0 |
| Dctpp1        | 1  | 0 | 0 | 0 |
| Sephs2        | 1  | 0 | 0 | 0 |
| Zfp768        | 2  | 0 | 0 | 0 |
| Zfp747        | 3  | 0 | 0 | 0 |
| 9130019O22Rik | 2  | 0 | 0 | 0 |
| E430018J23Rik | 3  | 0 | 0 | 0 |
| Zfp764        | 3  | 0 | 0 | 0 |
| Zfp689        | 1  | 0 | 0 | 0 |
| Gm166         | 4  | 0 | 0 | 0 |
| Stx1b         | 4  | 0 | 0 | 0 |
| Vkorc1        | 3  | 0 | 0 | 0 |
| Prss36        | 10 | 0 | 0 | 0 |
| Pycard        | 1  | 0 | 0 | 0 |
| BC017158      | 4  | 0 | 0 | 0 |
| Rgs10         | 2  | 0 | 0 | 0 |
| Tial1         | 4  | 0 | 0 | 0 |
| Mcmbp         | 1  | 0 | 0 | 0 |
| Gm5903        | 1  | 0 | 0 | 0 |
| Ate1          | 5  | 0 | 0 | 0 |
| Nsmce4a       | 2  | 0 | 0 | 0 |
| Gm5602        | 1  | 0 | 0 | 0 |
| 2310057M21Rik | 4  | 0 | 0 | 0 |
| Ikzf5         | 5  | 0 | 0 | 0 |
| Cpxm2         | 5  | 0 | 0 | 0 |
| Chst15        | 6  | 0 | 0 | 0 |
| Oat           | 1  | 0 | 0 | 0 |
| Ctbp2         | 5  | 0 | 0 | 0 |
| Uros          | 3  | 0 | 0 | 0 |
| Dhx32         | 5  | 0 | 0 | 0 |
| Fam196a       | 6  | 0 | 0 | 0 |
| B830028B13Rik | 1  | 0 | 0 | 0 |
| 9430038I01Rik | 6  | 0 | 0 | 0 |
| Stk32c        | 5  | 0 | 0 | 0 |
| Nkx6-2        | 1  | 0 | 0 | 0 |
| Caly          | 2  | 0 | 0 | 0 |
| Echs1         | 1  | 0 | 0 | 0 |
| Sprn          | 3  | 0 | 0 | 0 |
| Zfp941        | 3  | 0 | 0 | 0 |
| Sirt3         | 4  | 0 | 0 | 0 |
| Ifitm2        | 1  | 0 | 0 | 0 |

|               |    |   |   |   |
|---------------|----|---|---|---|
| Ifitm3        | 1  | 0 | 0 | 0 |
| Sigirr        | 7  | 0 | 0 | 0 |
| XLOC_030818   | 1  | 0 | 0 | 0 |
| Irf7          | 5  | 0 | 0 | 0 |
| Deaf1         | 3  | 0 | 0 | 0 |
| Pddc1         | 1  | 0 | 0 | 0 |
| Cend1         | 3  | 0 | 0 | 0 |
| Slc25a22      | 15 | 0 | 0 | 0 |
| Chid1         | 2  | 0 | 0 | 0 |
| Tollip        | 2  | 0 | 0 | 0 |
| 2700078K21Rik | 4  | 0 | 0 | 0 |
| Dusp8         | 3  | 0 | 0 | 0 |
| XLOC_030835   | 3  | 0 | 0 | 0 |
| Ctsd          | 1  | 0 | 0 | 0 |
| AK145379      | 2  | 0 | 0 | 0 |
| Th            | 6  | 0 | 0 | 0 |
| R74862        | 1  | 0 | 0 | 0 |
| Cdkn1c        | 6  | 0 | 0 | 0 |
| Phlda2        | 2  | 0 | 0 | 0 |
| Nap1l4        | 7  | 0 | 0 | 0 |
| Tnfrsf22      | 4  | 0 | 0 | 0 |
| Tnfrsf23      | 3  | 0 | 0 | 0 |
| Osbp15        | 5  | 0 | 0 | 0 |
| Mrgpre        | 4  | 0 | 0 | 0 |
| Cttn          | 10 | 0 | 0 | 0 |
| Ppfia1        | 10 | 0 | 0 | 0 |
| Fadd          | 1  | 0 | 0 | 0 |
| Ano1          | 3  | 0 | 0 | 0 |
| Tpcn2         | 9  | 0 | 0 | 0 |
| 1810010D01Rik | 3  | 0 | 0 | 0 |
| XLOC_029467   | 2  | 0 | 0 | 0 |
| Zfp524        | 2  | 0 | 0 | 0 |
| Zfp865        | 4  | 0 | 0 | 0 |
| Zfp580        | 4  | 0 | 0 | 0 |
| Pla2g4c       | 2  | 0 | 0 | 0 |
| XLOC_029494   | 2  | 0 | 0 | 0 |
| Napa          | 6  | 0 | 0 | 0 |
| Pglyrp1       | 2  | 0 | 0 | 0 |
| AK043814      | 5  | 0 | 0 | 0 |
| Zfp112        | 4  | 0 | 0 | 0 |
| Zfp93         | 2  | 0 | 0 | 0 |
| Cadm4         | 2  | 0 | 0 | 0 |
| Ethe1         | 1  | 0 | 0 | 0 |
| RP23-86L13.2  | 1  | 0 | 0 | 0 |
| Hipk4         | 2  | 0 | 0 | 0 |
| Dyrk1b        | 4  | 0 | 0 | 0 |
| Paf1          | 4  | 0 | 0 | 0 |

|               |   |   |   |   |
|---------------|---|---|---|---|
| Vsig10l       | 3 | 0 | 0 | 0 |
| XLOC_029693   | 1 | 0 | 0 | 0 |
| XLOC_029705   | 1 | 0 | 0 | 0 |
| Dbp           | 1 | 0 | 0 | 0 |
| XLOC_029760   | 1 | 0 | 0 | 0 |
| XLOC_029765   | 1 | 0 | 0 | 0 |
| Isg20         | 2 | 0 | 0 | 0 |
| Prc1          | 3 | 0 | 0 | 0 |
| Hddc3         | 2 | 0 | 0 | 0 |
| XLOC_029821   | 1 | 0 | 0 | 0 |
| Adamts3       | 4 | 0 | 0 | 0 |
| Picalm        | 5 | 0 | 0 | 0 |
| Rab6          | 2 | 0 | 0 | 0 |
| Trpc2         | 4 | 0 | 0 | 0 |
| XLOC_029910   | 1 | 0 | 0 | 0 |
| XLOC_029922   | 6 | 0 | 0 | 0 |
| Rpl27a        | 3 | 0 | 0 | 0 |
| XLOC_029959   | 2 | 0 | 0 | 0 |
| 2610020H08Rik | 4 | 0 | 0 | 0 |
| Lymr1         | 7 | 0 | 0 | 0 |
| AK140221      | 2 | 0 | 0 | 0 |
| XLOC_030000   | 1 | 0 | 0 | 0 |
| Rabep2        | 4 | 0 | 0 | 0 |
| Ccdc101       | 2 | 0 | 0 | 0 |
| Bola2         | 1 | 0 | 0 | 0 |
| Mapk3         | 3 | 0 | 0 | 0 |
| Tbx6          | 4 | 0 | 0 | 0 |
| Hirip3        | 2 | 0 | 0 | 0 |
| BC048731      | 1 | 0 | 0 | 0 |
| Setd1a        | 6 | 0 | 0 | 0 |
| Hsd3b7        | 2 | 0 | 0 | 0 |
| Myst1         | 3 | 0 | 0 | 0 |
| Btbd16        | 1 | 0 | 0 | 0 |
| Pstk          | 2 | 0 | 0 | 0 |
| Fank1         | 3 | 0 | 0 | 0 |
| Cd151         | 9 | 0 | 0 | 0 |
| XLOC_030107   | 4 | 0 | 0 | 0 |
| Oscar         | 1 | 0 | 0 | 0 |
| Tmc4          | 4 | 0 | 0 | 0 |
| Lair1         | 1 | 0 | 0 | 0 |
| Cdc42ep5      | 2 | 0 | 0 | 0 |
| Zfp772        | 3 | 0 | 0 | 0 |
| XLOC_030175   | 2 | 0 | 0 | 0 |
| Sae1          | 1 | 0 | 0 | 0 |
| Bloc1s3       | 2 | 0 | 0 | 0 |
| Tomm40        | 2 | 0 | 0 | 0 |
| Zfp111        | 4 | 0 | 0 | 0 |



|               |   |   |   |   |
|---------------|---|---|---|---|
| Atp1a3        | 3 | 0 | 0 | 0 |
| Grik5         | 2 | 0 | 0 | 0 |
| Shkbp1        | 2 | 0 | 0 | 0 |
| XLOC_030260   | 2 | 0 | 0 | 0 |
| 1700049G17Rik | 3 | 0 | 0 | 0 |
| XLOC_030263   | 2 | 0 | 0 | 0 |
| Med29         | 1 | 0 | 0 | 0 |
| Lin37         | 4 | 0 | 0 | 0 |
| Lsr           | 6 | 0 | 0 | 0 |
| AK049985      | 1 | 0 | 0 | 0 |
| AK081136      | 4 | 0 | 0 | 0 |
| 1700028J19Rik | 6 | 0 | 0 | 0 |
| Trpm4         | 7 | 0 | 0 | 0 |
| Fgf21         | 1 | 0 | 0 | 0 |
| XLOC_030431   | 3 | 0 | 0 | 0 |
| Mrgpra3       | 5 | 0 | 0 | 0 |
| XLOC_030432   | 2 | 0 | 0 | 0 |
| XLOC_030433   | 2 | 0 | 0 | 0 |
| XLOC_030436   | 2 | 0 | 0 | 0 |
| XLOC_030443   | 3 | 0 | 0 | 0 |
| Gabra5        | 7 | 0 | 0 | 0 |
| Ipw           | 3 | 0 | 0 | 0 |
| XLOC_030489   | 1 | 0 | 0 | 0 |
| Rccd1         | 2 | 0 | 0 | 0 |
| Wdr73         | 2 | 0 | 0 | 0 |
| Rps17         | 6 | 0 | 0 | 0 |
| Lrrc51        | 2 | 0 | 0 | 0 |
| Rrp8          | 4 | 0 | 0 | 0 |
| Dchs1         | 5 | 0 | 0 | 0 |
| Stk33         | 6 | 0 | 0 | 0 |
| Gm9105        | 1 | 0 | 0 | 0 |
| Ascl3         | 1 | 0 | 0 | 0 |
| AK009335      | 3 | 0 | 0 | 0 |
| Smg1          | 3 | 0 | 0 | 0 |
| AK018490      | 1 | 0 | 0 | 0 |
| AK043947      | 2 | 0 | 0 | 0 |
| Lat           | 2 | 0 | 0 | 0 |
| Nfatc2ip      | 3 | 0 | 0 | 0 |
| Maz           | 4 | 0 | 0 | 0 |
| Kif22         | 2 | 0 | 0 | 0 |
| XLOC_030751   | 1 | 0 | 0 | 0 |
| Cox6a2        | 1 | 0 | 0 | 0 |
| AK080057      | 2 | 0 | 0 | 0 |
| Mapk1ip1      | 2 | 0 | 0 | 0 |
| Bnip3         | 6 | 0 | 0 | 0 |
| RP23-118G3.2  | 2 | 0 | 0 | 0 |
| Cars          | 6 | 0 | 0 | 0 |

|               |   |   |   |   |
|---------------|---|---|---|---|
| Cnot3         | 5 | 0 | 0 | 0 |
| Zscan22       | 4 | 0 | 0 | 0 |
| XLOC_029516   | 1 | 0 | 0 | 0 |
| Ckm           | 2 | 0 | 0 | 0 |
| XLOC_029551   | 1 | 0 | 0 | 0 |
| Gm8946        | 1 | 0 | 0 | 0 |
| 2310022A10Rik | 3 | 0 | 0 | 0 |
| 4933426I21Rik | 2 | 0 | 0 | 0 |
| 9530053A07Rik | 3 | 0 | 0 | 0 |
| Rasgrp4       | 3 | 0 | 0 | 0 |
| Ggn           | 1 | 0 | 0 | 0 |
| XLOC_029625   | 1 | 0 | 0 | 0 |
| XLOC_029652   | 3 | 0 | 0 | 0 |
| Rhpn2         | 1 | 0 | 0 | 0 |
| XLOC_029691   | 1 | 0 | 0 | 0 |
| XLOC_029730   | 1 | 0 | 0 | 0 |
| Siglech       | 1 | 0 | 0 | 0 |
| AK035406      | 1 | 0 | 0 | 0 |
| Acan          | 1 | 0 | 0 | 0 |
| Fanci         | 1 | 0 | 0 | 0 |
| D330012F22Rik | 1 | 0 | 0 | 0 |
| XLOC_029835   | 1 | 0 | 0 | 0 |
| E230029C05Rik | 2 | 0 | 0 | 0 |
| Lrrc32        | 3 | 0 | 0 | 0 |
| Xrra1         | 1 | 0 | 0 | 0 |
| 3200002M19Rik | 7 | 0 | 0 | 0 |
| Olf558        | 2 | 0 | 0 | 0 |
| Calcb         | 1 | 0 | 0 | 0 |
| Insc          | 3 | 0 | 0 | 0 |
| XLOC_029958   | 1 | 0 | 0 | 0 |
| Il21r         | 5 | 0 | 0 | 0 |
| D430042O09Rik | 5 | 0 | 0 | 0 |
| Tmem80        | 1 | 0 | 0 | 0 |
| Mrpl23        | 3 | 0 | 0 | 0 |
| Il11          | 1 | 0 | 0 | 0 |
| XLOC_030147   | 1 | 0 | 0 | 0 |
| Vmn2r29       | 2 | 0 | 0 | 0 |
| Vmn1r90       | 1 | 0 | 0 | 0 |
| Fosb          | 1 | 0 | 0 | 0 |
| Apoe          | 2 | 0 | 0 | 0 |
| XLOC_030225   | 6 | 0 | 0 | 0 |
| Cd177         | 2 | 0 | 0 | 0 |
| BC027344      | 1 | 0 | 0 | 0 |
| Zfp74         | 1 | 0 | 0 | 0 |
| Fxyd7         | 5 | 0 | 0 | 0 |
| XLOC_030329   | 2 | 0 | 0 | 0 |
| Gpatc1        | 1 | 0 | 0 | 0 |

|               |   |   |   |   |
|---------------|---|---|---|---|
| XLOC_030343   | 5 | 0 | 0 | 0 |
| Gm10109       | 2 | 0 | 0 | 0 |
| Clec11a       | 2 | 0 | 0 | 0 |
| Sec1          | 3 | 0 | 0 | 0 |
| XLOC_030449   | 1 | 0 | 0 | 0 |
| St8sia2       | 1 | 0 | 0 | 0 |
| Bnc1          | 1 | 0 | 0 | 0 |
| Gm10159       | 1 | 0 | 0 | 0 |
| BC048663      | 2 | 0 | 0 | 0 |
| Pcf11         | 3 | 0 | 0 | 0 |
| 4632427E13Rik | 1 | 0 | 0 | 0 |
| Tsku          | 3 | 0 | 0 | 0 |
| Tomt          | 1 | 0 | 0 | 0 |
| BC051516      | 1 | 0 | 0 | 0 |
| AK034016      | 3 | 0 | 0 | 0 |
| Ino80e        | 1 | 0 | 0 | 0 |
| Bcl7c         | 4 | 0 | 0 | 0 |
| Mki67         | 1 | 0 | 0 | 0 |
| XLOC_030797   | 2 | 0 | 0 | 0 |
| Ifitm6        | 1 | 0 | 0 | 0 |
| 6330512M04Rik | 8 | 0 | 0 | 0 |
| AK039657      | 1 | 0 | 0 | 0 |
| Tsen34        | 1 | 0 | 0 | 0 |
| XLOC_029493   | 1 | 0 | 0 | 0 |
| Zfp296        | 2 | 0 | 0 | 0 |
| Zfp428        | 2 | 0 | 0 | 0 |
| Cd79a         | 1 | 0 | 0 | 0 |
| Adck4         | 1 | 0 | 0 | 0 |
| AK154275      | 1 | 0 | 0 | 0 |
| AK087850      | 1 | 0 | 0 | 0 |
| Nkg7          | 1 | 0 | 0 | 0 |
| AK087248      | 1 | 0 | 0 | 0 |
| Hrc           | 1 | 0 | 0 | 0 |
| Oca2          | 1 | 0 | 0 | 0 |
| Mesp2         | 1 | 0 | 0 | 0 |
| XLOC_029824   | 1 | 0 | 0 | 0 |
| XLOC_029832   | 1 | 0 | 0 | 0 |
| XLOC_029842   | 1 | 0 | 0 | 0 |
| AK132723      | 3 | 0 | 0 | 0 |
| XLOC_029885   | 1 | 0 | 0 | 0 |
| XLOC_029934   | 1 | 0 | 0 | 0 |
| E130201H02Rik | 1 | 0 | 0 | 0 |
| 4933427G17Rik | 1 | 0 | 0 | 0 |
| XLOC_029995   | 1 | 0 | 0 | 0 |
| XLOC_030004   | 1 | 0 | 0 | 0 |
| XLOC_030006   | 1 | 0 | 0 | 0 |
| Itgad         | 2 | 0 | 0 | 0 |

|               |       |   |   |   |   |
|---------------|-------|---|---|---|---|
| Hmx3          |       | 1 | 0 | 0 | 0 |
| Lrrc27        |       | 1 | 0 | 0 | 0 |
| XLOC_030091   |       | 1 | 0 | 0 | 0 |
| Tnnt3         |       | 1 | 0 | 0 | 0 |
| XLOC_030120   |       | 2 | 0 | 0 | 0 |
| Nlrp12        |       | 5 | 0 | 0 | 0 |
| XLOC_030127   |       | 1 | 0 | 0 | 0 |
| Gm1078        |       | 1 | 0 | 0 | 0 |
| XLOC_030201   |       | 2 | 0 | 0 | 0 |
| Gm7092        |       | 1 | 0 | 0 | 0 |
| Kcnk6         |       | 2 | 0 | 0 | 0 |
| Hcst          |       | 1 | 0 | 0 | 0 |
| Upk1a         |       | 1 | 0 | 0 | 0 |
| Gm5593        |       | 1 | 0 | 0 | 0 |
| XLOC_030434   |       | 2 | 0 | 0 | 0 |
| XLOC_030439   |       | 1 | 0 | 0 | 0 |
| C230091D08Rik |       | 1 | 0 | 0 | 0 |
| XLOC_030455   |       | 2 | 0 | 0 | 0 |
| AK043101      |       | 1 | 0 | 0 | 0 |
| Nmb           |       | 2 | 0 | 0 | 0 |
| Hbb-b1        |       | 1 | 0 | 0 | 0 |
| Trim30d       |       | 3 | 0 | 0 | 0 |
| Trim66        |       | 2 | 0 | 0 | 0 |
| 1700012D14Rik |       | 1 | 0 | 0 | 0 |
| XLOC_030708   |       | 2 | 0 | 0 | 0 |
|               | 41883 | 6 | 0 | 0 | 0 |
| Usp29         |       | 1 | 0 | 0 | 0 |
| Slc8a2        |       | 2 | 0 | 0 | 0 |
| XLOC_029505   |       | 1 | 0 | 0 | 0 |
| XLOC_029513   |       | 1 | 0 | 0 | 0 |
| Fbxo46        |       | 1 | 0 | 0 | 0 |
| 4732471J01Rik |       | 1 | 0 | 0 | 0 |
| AK131900      |       | 2 | 0 | 0 | 0 |
| Slc28a1       |       | 1 | 0 | 0 | 0 |
| XLOC_029831   |       | 1 | 0 | 0 | 0 |
| XLOC_029837   |       | 2 | 0 | 0 | 0 |
| XLOC_029978   |       | 1 | 0 | 0 | 0 |
| Orai3         |       | 1 | 0 | 0 | 0 |
| AK086971      |       | 2 | 0 | 0 | 0 |
| XLOC_030068   |       | 2 | 0 | 0 | 0 |
| XLOC_030093   |       | 1 | 0 | 0 | 0 |
| Tspan4        |       | 1 | 0 | 0 | 0 |
| XLOC_030204   |       | 1 | 0 | 0 | 0 |
| Klc3          |       | 2 | 0 | 0 | 0 |
| mKIAA1860     |       | 1 | 0 | 0 | 0 |
| XLOC_030255   |       | 1 | 0 | 0 | 0 |
| Catsperg1     |       | 1 | 0 | 0 | 0 |

|               |    |   |   |   |
|---------------|----|---|---|---|
| XLOC_030342   | 1  | 0 | 0 | 0 |
| Ap3s2         | 2  | 0 | 0 | 0 |
| XLOC_030593   | 1  | 0 | 0 | 0 |
| Taf10         | 2  | 0 | 0 | 0 |
| Ears2         | 2  | 0 | 0 | 0 |
| BC099577      | 1  | 0 | 0 | 0 |
| Gm4532        | 1  | 0 | 0 | 0 |
| AK149132      | 1  | 0 | 0 | 0 |
| Ttyh1         | 1  | 0 | 0 | 0 |
| Ccdc106       | 2  | 0 | 0 | 0 |
| XLOC_029501   | 1  | 0 | 0 | 0 |
| XLOC_029514   | 1  | 0 | 0 | 0 |
| XLOC_029542   | 1  | 0 | 0 | 0 |
| XLOC_029591   | 1  | 0 | 0 | 0 |
| XLOC_029613   | 1  | 0 | 0 | 0 |
| mKIAA0961     | 1  | 0 | 0 | 0 |
| Lgi4          | 2  | 0 | 0 | 0 |
| XLOC_029644   | 1  | 0 | 0 | 0 |
| Klk10         | 1  | 0 | 0 | 0 |
| Tsks          | 1  | 0 | 0 | 0 |
| AK042966      | 1  | 0 | 0 | 0 |
| XLOC_029719   | 1  | 0 | 0 | 0 |
| XLOC_029724   | 1  | 0 | 0 | 0 |
| XLOC_029791   | 1  | 0 | 0 | 0 |
| XLOC_029917   | 1  | 0 | 0 | 0 |
| AK136817      | 1  | 0 | 0 | 0 |
| Ptprh         | 1  | 0 | 0 | 0 |
| Fxyd3         | 2  | 0 | 0 | 0 |
| XLOC_030330   | 1  | 0 | 0 | 0 |
| RP23-390N24.1 | 1  | 0 | 0 | 0 |
| Saa1          | 1  | 0 | 0 | 0 |
| Gabrg3        | 1  | 0 | 0 | 0 |
| XLOC_030670   | 1  | 0 | 0 | 0 |
| AK053178      | 1  | 0 | 0 | 0 |
| Atp2a1        | 1  | 0 | 0 | 0 |
| Sult1a1       | 1  | 0 | 0 | 0 |
| XLOC_030761   | 2  | 0 | 0 | 0 |
| Fam53b        | 2  | 0 | 0 | 0 |
| 5830432E09Rik | 1  | 0 | 0 | 0 |
| XLOC_030791   | 1  | 0 | 0 | 0 |
| XLOC_030792   | 1  | 0 | 0 | 0 |
| XLOC_030832   | 1  | 0 | 0 | 0 |
| Arhgef18      | 4  | 0 | 0 | 0 |
| Zfp358        | 3  | 0 | 0 | 0 |
| Pnpla6        | 10 | 0 | 0 | 0 |
| 2310057J16Rik | 9  | 0 | 0 | 0 |
| 2900053A13Rik | 6  | 0 | 0 | 0 |

|               |    |   |   |   |
|---------------|----|---|---|---|
| Stxbp2        | 8  | 0 | 0 | 0 |
| Trappc5       | 1  | 0 | 0 | 0 |
| Evi5l         | 7  | 0 | 0 | 0 |
| Map2k7        | 5  | 0 | 0 | 0 |
| Snpc2         | 3  | 0 | 0 | 0 |
| Lass4         | 6  | 0 | 0 | 0 |
| Abhd13        | 2  | 0 | 0 | 0 |
| Tnfsf13b      | 2  | 0 | 0 | 0 |
| Myo16         | 5  | 0 | 0 | 0 |
| Col4a2        | 3  | 0 | 0 | 0 |
| BC030398      | 1  | 0 | 0 | 0 |
| Carkd         | 4  | 0 | 0 | 0 |
| Ing1          | 3  | 0 | 0 | 0 |
| Arhgef7       | 2  | 0 | 0 | 0 |
| 4931415C17Rik | 3  | 0 | 0 | 0 |
| Atp11a        | 5  | 0 | 0 | 0 |
| Mcf2l         | 5  | 0 | 0 | 0 |
| Cul4a         | 5  | 0 | 0 | 0 |
| Lamp1         | 4  | 0 | 0 | 0 |
| Tmco3         | 2  | 0 | 0 | 0 |
| Tfdp1         | 10 | 0 | 0 | 0 |
| Fam70b        | 2  | 0 | 0 | 0 |
| Cdc16         | 1  | 0 | 0 | 0 |
| Upf3a         | 4  | 0 | 0 | 0 |
| Zfp828        | 2  | 0 | 0 | 0 |
| Fbxo25        | 3  | 0 | 0 | 0 |
| Cln8          | 2  | 0 | 0 | 0 |
| Arhgef10      | 9  | 0 | 0 | 0 |
| Kbtbd11       | 6  | 0 | 0 | 0 |
| XLOC_032187   | 2  | 0 | 0 | 0 |
| Agpat5        | 1  | 0 | 0 | 0 |
| Rpl19-ps11    | 1  | 0 | 0 | 0 |
| XLOC_032197   | 4  | 0 | 0 | 0 |
| Alg11         | 2  | 0 | 0 | 0 |
| Vps36         | 1  | 0 | 0 | 0 |
| Thsd1         | 6  | 0 | 0 | 0 |
| BC035532      | 2  | 0 | 0 | 0 |
| Plat          | 2  | 0 | 0 | 0 |
| Myst3         | 5  | 0 | 0 | 0 |
| Ank1          | 12 | 0 | 0 | 0 |
| Sfrp1         | 3  | 0 | 0 | 0 |
| Zmat4         | 8  | 0 | 0 | 0 |
| Tm2d2         | 1  | 0 | 0 | 0 |
| Fgfr1         | 12 | 0 | 0 | 0 |
| Whsc1l1       | 7  | 0 | 0 | 0 |
| Kcnu1         | 5  | 0 | 0 | 0 |
| Zfp703        | 1  | 0 | 0 | 0 |

|               |    |   |   |   |
|---------------|----|---|---|---|
| Erlin2        | 4  | 0 | 0 | 0 |
| Prosc         | 2  | 0 | 0 | 0 |
| Gpr124        | 1  | 0 | 0 | 0 |
| Eif4ebp1      | 3  | 0 | 0 | 0 |
| Chrn3         | 5  | 0 | 0 | 0 |
| XLOC_032236   | 1  | 0 | 0 | 0 |
| Dusp26        | 4  | 0 | 0 | 0 |
| BC019943      | 5  | 0 | 0 | 0 |
| XLOC_032243   | 4  | 0 | 0 | 0 |
| Tex15         | 1  | 0 | 0 | 0 |
| Ppp2cb        | 2  | 0 | 0 | 0 |
| Gtf2e2        | 2  | 0 | 0 | 0 |
| Mboat4        | 3  | 0 | 0 | 0 |
| Tmem66        | 5  | 0 | 0 | 0 |
| Dusp4         | 4  | 0 | 0 | 0 |
| Ppp1r3b       | 1  | 0 | 0 | 0 |
| Mfhas1        | 4  | 0 | 0 | 0 |
| XLOC_032261   | 3  | 0 | 0 | 0 |
| D8Ert82e      | 1  | 0 | 0 | 0 |
| Kiaa1456      | 3  | 0 | 0 | 0 |
| Tusc3         | 10 | 0 | 0 | 0 |
| AK080223      | 2  | 0 | 0 | 0 |
| XLOC_032269   | 1  | 0 | 0 | 0 |
| Efha2         | 3  | 0 | 0 | 0 |
| Zdhc2         | 3  | 0 | 0 | 0 |
| Slc7a2        | 4  | 0 | 0 | 0 |
| Pdgfrl        | 1  | 0 | 0 | 0 |
| Gm16348       | 1  | 0 | 0 | 0 |
| Pcm1          | 4  | 0 | 0 | 0 |
| Fat1          | 5  | 0 | 0 | 0 |
| 4933411K20Rik | 5  | 0 | 0 | 0 |
| Acsl1         | 6  | 0 | 0 | 0 |
| Casp3         | 3  | 0 | 0 | 0 |
| Irf2          | 3  | 0 | 0 | 0 |
| Rwdd4a        | 2  | 0 | 0 | 0 |
| AK032387      | 7  | 0 | 0 | 0 |
| Vegfc         | 3  | 0 | 0 | 0 |
| Gpm6a         | 3  | 0 | 0 | 0 |
| Hpgd          | 4  | 0 | 0 | 0 |
| Fbxo8         | 2  | 0 | 0 | 0 |
| AW046200      | 3  | 0 | 0 | 0 |
| Mfap3l        | 3  | 0 | 0 | 0 |
| 2700029M09Rik | 4  | 0 | 0 | 0 |
| Nek1          | 8  | 0 | 0 | 0 |
| Cbr4          | 1  | 0 | 0 | 0 |
| Ddx60         | 10 | 0 | 0 | 0 |
| Spock3        | 5  | 0 | 0 | 0 |

|               |    |   |   |   |
|---------------|----|---|---|---|
| Tmem192       | 1  | 0 | 0 | 0 |
| Npy1r         | 4  | 0 | 0 | 0 |
| Naf1          | 4  | 0 | 0 | 0 |
| Nat2          | 2  | 0 | 0 | 0 |
| Sh2d4a        | 3  | 0 | 0 | 0 |
| Ints10        | 8  | 0 | 0 | 0 |
| Lpl           | 1  | 0 | 0 | 0 |
| Atp6v1b2      | 1  | 0 | 0 | 0 |
| Zfp930        | 4  | 0 | 0 | 0 |
| D130040H23Rik | 1  | 0 | 0 | 0 |
| Atp13a1       | 6  | 0 | 0 | 0 |
| Pbx4          | 4  | 0 | 0 | 0 |
| Sugp1         | 4  | 0 | 0 | 0 |
| Tm6sf2        | 3  | 0 | 0 | 0 |
| Hapln4        | 4  | 0 | 0 | 0 |
| Nr2c2ap       | 3  | 0 | 0 | 0 |
| Mef2b         | 1  | 0 | 0 | 0 |
| 2310045N01Rik | 1  | 0 | 0 | 0 |
| Tmem161a      | 2  | 0 | 0 | 0 |
| Sugp2         | 9  | 0 | 0 | 0 |
| Cope          | 1  | 0 | 0 | 0 |
| Lass1         | 2  | 0 | 0 | 0 |
| Fkbp8         | 8  | 0 | 0 | 0 |
| Eil           | 3  | 0 | 0 | 0 |
| Lsm4          | 2  | 0 | 0 | 0 |
| Rab3a         | 3  | 0 | 0 | 0 |
| XLOC_032360   | 2  | 0 | 0 | 0 |
| Use1          | 5  | 0 | 0 | 0 |
| Ocel1         | 2  | 0 | 0 | 0 |
| 5430437P03Rik | 1  | 0 | 0 | 0 |
| Mrpl34        | 1  | 0 | 0 | 0 |
| Gtpbp3        | 6  | 0 | 0 | 0 |
| Fam125a       | 5  | 0 | 0 | 0 |
| Pgls          | 2  | 0 | 0 | 0 |
| Zfp709        | 3  | 0 | 0 | 0 |
| Zfp617        | 7  | 0 | 0 | 0 |
| Tpm4          | 2  | 0 | 0 | 0 |
| Rab8a         | 1  | 0 | 0 | 0 |
| Fam32a        | 2  | 0 | 0 | 0 |
| 1700030K09Rik | 1  | 0 | 0 | 0 |
| XLOC_032385   | 1  | 0 | 0 | 0 |
| Tmem38a       | 4  | 0 | 0 | 0 |
| Nwd1          | 9  | 0 | 0 | 0 |
| Hmgxb4        | 10 | 0 | 0 | 0 |
| Tom1          | 11 | 0 | 0 | 0 |
| Mcm5          | 5  | 0 | 0 | 0 |
| Rasd2         | 2  | 0 | 0 | 0 |



|               |    |   |   |   |
|---------------|----|---|---|---|
| 1700007B14Rik | 1  | 0 | 0 | 0 |
| Nr3c2         | 5  | 0 | 0 | 0 |
| Prmt10        | 4  | 0 | 0 | 0 |
| Ttc29         | 4  | 0 | 0 | 0 |
| Zfp827        | 5  | 0 | 0 | 0 |
| Otud4         | 6  | 0 | 0 | 0 |
| Tbc1d9        | 5  | 0 | 0 | 0 |
| XLOC_032410   | 2  | 0 | 0 | 0 |
| Clgn          | 6  | 0 | 0 | 0 |
| Gipc1         | 5  | 0 | 0 | 0 |
| Ddx39         | 2  | 0 | 0 | 0 |
| Lphn1         | 5  | 0 | 0 | 0 |
| Asf1b         | 2  | 0 | 0 | 0 |
| Samd1         | 2  | 0 | 0 | 0 |
| Palm3         | 5  | 0 | 0 | 0 |
| Rfx1          | 5  | 0 | 0 | 0 |
| 4930432K21Rik | 6  | 0 | 0 | 0 |
| Cacna1a       | 10 | 0 | 0 | 0 |
| Gadd45gip1    | 2  | 0 | 0 | 0 |
| Farsa         | 2  | 0 | 0 | 0 |
| Syce2         | 3  | 0 | 0 | 0 |
| Prdx2         | 4  | 0 | 0 | 0 |
| 2310036O22Rik | 2  | 0 | 0 | 0 |
| Dhps          | 5  | 0 | 0 | 0 |
| Man2b1        | 6  | 0 | 0 | 0 |
| Gpt2          | 5  | 0 | 0 | 0 |
| Gm2694        | 6  | 0 | 0 | 0 |
| Tmem188       | 3  | 0 | 0 | 0 |
| Heatr3        | 2  | 0 | 0 | 0 |
| Papd5         | 3  | 0 | 0 | 0 |
| Adcy7         | 5  | 0 | 0 | 0 |
| Nkd1          | 2  | 0 | 0 | 0 |
| Cyld          | 9  | 0 | 0 | 0 |
| XLOC_032460   | 11 | 0 | 0 | 0 |
| Rbl2          | 2  | 0 | 0 | 0 |
| Fto           | 5  | 0 | 0 | 0 |
| BC100534      | 1  | 0 | 0 | 0 |
| Lpcat2        | 6  | 0 | 0 | 0 |
| XLOC_032468   | 1  | 0 | 0 | 0 |
| Gnao1         | 10 | 0 | 0 | 0 |
| Ogfod1        | 1  | 0 | 0 | 0 |
| Mt3           | 1  | 0 | 0 | 0 |
| Mt2           | 3  | 0 | 0 | 0 |
| Mt1           | 1  | 0 | 0 | 0 |
| Nup93         | 9  | 0 | 0 | 0 |
| Slc12a3       | 6  | 0 | 0 | 0 |
| Herpud1       | 4  | 0 | 0 | 0 |

|               |    |   |   |   |
|---------------|----|---|---|---|
| Ap3s1-ps2     | 1  | 0 | 0 | 0 |
| Cpne2         | 2  | 0 | 0 | 0 |
| Rspry1        | 2  | 0 | 0 | 0 |
| Arl2bp        | 4  | 0 | 0 | 0 |
| Cx3cl1        | 1  | 0 | 0 | 0 |
| Ccl17         | 1  | 0 | 0 | 0 |
| Coq9          | 1  | 0 | 0 | 0 |
| Polr2c        | 6  | 0 | 0 | 0 |
| Gpr56         | 7  | 0 | 0 | 0 |
| Katnb1        | 6  | 0 | 0 | 0 |
| AA960436      | 2  | 0 | 0 | 0 |
| Mmp15         | 3  | 0 | 0 | 0 |
| Gins3         | 3  | 0 | 0 | 0 |
| Ndrg4         | 9  | 0 | 0 | 0 |
| Setd6         | 3  | 0 | 0 | 0 |
| Gm15210       | 1  | 0 | 0 | 0 |
| Cdh5          | 2  | 0 | 0 | 0 |
| Bean1         | 9  | 0 | 0 | 0 |
| XLOC_032507   | 3  | 0 | 0 | 0 |
| Car7          | 6  | 0 | 0 | 0 |
| D230025D16Rik | 1  | 0 | 0 | 0 |
| E2f4          | 2  | 0 | 0 | 0 |
| Elmo3         | 6  | 0 | 0 | 0 |
| Tmem208       | 3  | 0 | 0 | 0 |
| XLOC_032521   | 1  | 0 | 0 | 0 |
| Plekhg4       | 11 | 0 | 0 | 0 |
| Fam65a        | 4  | 0 | 0 | 0 |
| Rltpr         | 8  | 0 | 0 | 0 |
| Nutf2         | 9  | 0 | 0 | 0 |
| Nrn1l         | 4  | 0 | 0 | 0 |
| Pskh1         | 2  | 0 | 0 | 0 |
| Dus2l         | 4  | 0 | 0 | 0 |
| Nfatc3        | 5  | 0 | 0 | 0 |
| Pla2g15       | 1  | 0 | 0 | 0 |
| Slc7a6        | 1  | 0 | 0 | 0 |
| Zfp90         | 3  | 0 | 0 | 0 |
| Cdh1          | 5  | 0 | 0 | 0 |
| Tmco7         | 4  | 0 | 0 | 0 |
| Has3          | 4  | 0 | 0 | 0 |
| Cirh1a        | 2  | 0 | 0 | 0 |
| Sntb2         | 3  | 0 | 0 | 0 |
| Vps4a         | 1  | 0 | 0 | 0 |
| Cyb5b         | 2  | 0 | 0 | 0 |
| XLOC_032547   | 1  | 0 | 0 | 0 |
| Zfhx3         | 5  | 0 | 0 | 0 |
| Pkd1l3        | 2  | 0 | 0 | 0 |
| Zfp821        | 6  | 0 | 0 | 0 |

|               |   |   |   |   |
|---------------|---|---|---|---|
| Ap1g1         | 4 | 0 | 0 | 0 |
| Phlpp2        | 6 | 0 | 0 | 0 |
| Zfp612        | 5 | 0 | 0 | 0 |
| Ftsjd1        | 1 | 0 | 0 | 0 |
| Vac14         | 1 | 0 | 0 | 0 |
| Mtss1l        | 3 | 0 | 0 | 0 |
| Cog4          | 1 | 0 | 0 | 0 |
| St3gal2       | 3 | 0 | 0 | 0 |
| Aars          | 4 | 0 | 0 | 0 |
| Pdpr          | 1 | 0 | 0 | 0 |
| Znrf1         | 4 | 0 | 0 | 0 |
| Zfp1          | 3 | 0 | 0 | 0 |
| Gabarapl2     | 4 | 0 | 0 | 0 |
| Terf2ip       | 1 | 0 | 0 | 0 |
| XLOC_032577   | 3 | 0 | 0 | 0 |
| Mon1b         | 3 | 0 | 0 | 0 |
| Nudt7         | 3 | 0 | 0 | 0 |
| Vat1l         | 5 | 0 | 0 | 0 |
| Wwox          | 5 | 0 | 0 | 0 |
| Atmin         | 1 | 0 | 0 | 0 |
| Gan           | 2 | 0 | 0 | 0 |
| XLOC_032587   | 1 | 0 | 0 | 0 |
| 4933407C03Rik | 8 | 0 | 0 | 0 |
| Hsbp1         | 1 | 0 | 0 | 0 |
| Mlycd         | 3 | 0 | 0 | 0 |
| Necab2        | 1 | 0 | 0 | 0 |
| Wfdc1         | 2 | 0 | 0 | 0 |
| Usp10         | 3 | 0 | 0 | 0 |
| Crispld2      | 3 | 0 | 0 | 0 |
| Gm10614       | 1 | 0 | 0 | 0 |
| XLOC_032603   | 1 | 0 | 0 | 0 |
| Cox4i1        | 5 | 0 | 0 | 0 |
| Map1lc3b      | 4 | 0 | 0 | 0 |
| Jph3          | 4 | 0 | 0 | 0 |
| XLOC_032613   | 1 | 0 | 0 | 0 |
| Zfpm1         | 6 | 0 | 0 | 0 |
| Zc3h18        | 4 | 0 | 0 | 0 |
| AK209590      | 1 | 0 | 0 | 0 |
| Ctu2          | 3 | 0 | 0 | 0 |
| Trappc2l      | 1 | 0 | 0 | 0 |
| Acsf3         | 5 | 0 | 0 | 0 |
| XLOC_032621   | 4 | 0 | 0 | 0 |
| Cdh15         | 3 | 0 | 0 | 0 |
| Spg7          | 4 | 0 | 0 | 0 |
| Rpl13         | 4 | 0 | 0 | 0 |
| Cpne7         | 1 | 0 | 0 | 0 |
| Cdk10         | 4 | 0 | 0 | 0 |

|               |   |   |   |   |
|---------------|---|---|---|---|
| Zfp276        | 6 | 0 | 0 | 0 |
| Spire2        | 1 | 0 | 0 | 0 |
| Tcf25         | 7 | 0 | 0 | 0 |
| Tubb3         | 2 | 0 | 0 | 0 |
| Def8          | 3 | 0 | 0 | 0 |
| Afg3l1        | 5 | 0 | 0 | 0 |
| Gas8          | 1 | 0 | 0 | 0 |
| Rhou          | 2 | 0 | 0 | 0 |
| Rab4a         | 5 | 0 | 0 | 0 |
| Gm4342        | 1 | 0 | 0 | 0 |
| mKIAA0133     | 5 | 0 | 0 | 0 |
| Galnt2        | 4 | 0 | 0 | 0 |
| Cog2          | 3 | 0 | 0 | 0 |
| Capn9         | 2 | 0 | 0 | 0 |
| Trim67        | 1 | 0 | 0 | 0 |
| Gnpat         | 3 | 0 | 0 | 0 |
| Tsnax         | 3 | 0 | 0 | 0 |
| XLOC_032650   | 2 | 0 | 0 | 0 |
| Disc1         | 5 | 0 | 0 | 0 |
| 4933403G14Rik | 1 | 0 | 0 | 0 |
| XLOC_032653   | 1 | 0 | 0 | 0 |
| Ntpcr         | 2 | 0 | 0 | 0 |
| BC021891      | 3 | 0 | 0 | 0 |
| Kcnk1         | 5 | 0 | 0 | 0 |
| Slc35f3       | 9 | 0 | 0 | 0 |
| 1810063B05Rik | 1 | 0 | 0 | 0 |
| XLOC_032660   | 7 | 0 | 0 | 0 |
| Nrp1          | 6 | 0 | 0 | 0 |
| Insr          | 5 | 0 | 0 | 0 |
| Xab2          | 4 | 0 | 0 | 0 |
| AK019114      | 4 | 0 | 0 | 0 |
| Cd209a        | 2 | 0 | 0 | 0 |
| Gm17605       | 1 | 0 | 0 | 0 |
| Timm44        | 5 | 0 | 0 | 0 |
| Elavl1        | 2 | 0 | 0 | 0 |
| Shcbp1        | 2 | 0 | 0 | 0 |
| Efnb2         | 3 | 0 | 0 | 0 |
| Arglu1        | 3 | 0 | 0 | 0 |
| XLOC_032681   | 3 | 0 | 0 | 0 |
| Fam155a       | 7 | 0 | 0 | 0 |
| Lig4          | 3 | 0 | 0 | 0 |
| Irs2          | 2 | 0 | 0 | 0 |
| Col4a1        | 2 | 0 | 0 | 0 |
| Rab20         | 2 | 0 | 0 | 0 |
| Ankrd10       | 9 | 0 | 0 | 0 |
| Tubgcp3       | 6 | 0 | 0 | 0 |
| Pcid2         | 4 | 0 | 0 | 0 |

|               |    |   |   |   |
|---------------|----|---|---|---|
| Grtp1         | 3  | 0 | 0 | 0 |
| Adprhl1       | 3  | 0 | 0 | 0 |
| Dcun1d2       | 5  | 0 | 0 | 0 |
| Gas6          | 1  | 0 | 0 | 0 |
| Rasa3         | 3  | 0 | 0 | 0 |
| 2410022L05Rik | 1  | 0 | 0 | 0 |
| 2610019F03Rik | 5  | 0 | 0 | 0 |
| Erich1        | 3  | 0 | 0 | 0 |
| XLOC_032707   | 2  | 0 | 0 | 0 |
| Angpt2        | 1  | 0 | 0 | 0 |
| XLOC_032713   | 2  | 0 | 0 | 0 |
| 6820431F20Rik | 3  | 0 | 0 | 0 |
| Nek3          | 4  | 0 | 0 | 0 |
| Slc25a15      | 7  | 0 | 0 | 0 |
| A1316807      | 1  | 0 | 0 | 0 |
| Vdac3         | 10 | 0 | 0 | 0 |
| Polb          | 5  | 0 | 0 | 0 |
| lkbkb         | 6  | 0 | 0 | 0 |
| Ap3m2         | 4  | 0 | 0 | 0 |
| Agpat6        | 4  | 0 | 0 | 0 |
| Gins4         | 1  | 0 | 0 | 0 |
| Golga7        | 6  | 0 | 0 | 0 |
| Ido2          | 1  | 0 | 0 | 0 |
| Adam9         | 9  | 0 | 0 | 0 |
| Plekha2       | 5  | 0 | 0 | 0 |
| Tacc1         | 9  | 0 | 0 | 0 |
| Ddhd2         | 4  | 0 | 0 | 0 |
| Bag4          | 1  | 0 | 0 | 0 |
| Ash2l         | 2  | 0 | 0 | 0 |
| Hgsnat        | 3  | 0 | 0 | 0 |
| 4930444A02Rik | 4  | 0 | 0 | 0 |
| Fnta          | 3  | 0 | 0 | 0 |
| XLOC_032747   | 2  | 0 | 0 | 0 |
| Chrna6        | 10 | 0 | 0 | 0 |
| Unc5d         | 2  | 0 | 0 | 0 |
| XLOC_032755   | 6  | 0 | 0 | 0 |
| Mak16         | 1  | 0 | 0 | 0 |
| Gm6877        | 1  | 0 | 0 | 0 |
| Wrn           | 5  | 0 | 0 | 0 |
| Ubxn8         | 2  | 0 | 0 | 0 |
| AK012595      | 1  | 0 | 0 | 0 |
| Rbpms         | 5  | 0 | 0 | 0 |
| Dctn6         | 4  | 0 | 0 | 0 |
| Leprotl1      | 5  | 0 | 0 | 0 |
| B930018H19    | 4  | 0 | 0 | 0 |
| Tnks          | 6  | 0 | 0 | 0 |
| Eri1          | 4  | 0 | 0 | 0 |

|               |    |   |   |   |
|---------------|----|---|---|---|
| Cldn23        | 1  | 0 | 0 | 0 |
| Lonrf1        | 2  | 0 | 0 | 0 |
| Dlc1          | 6  | 0 | 0 | 0 |
| Mtmr7         | 2  | 0 | 0 | 0 |
| Mtus1         | 9  | 0 | 0 | 0 |
| Fgl1          | 4  | 0 | 0 | 0 |
| Asah1         | 8  | 0 | 0 | 0 |
| Frg1          | 1  | 0 | 0 | 0 |
| Cyp4v3        | 1  | 0 | 0 | 0 |
| Fam149a       | 2  | 0 | 0 | 0 |
| Tlr3          | 8  | 0 | 0 | 0 |
| 1700029J07Rik | 5  | 0 | 0 | 0 |
| Snx25         | 4  | 0 | 0 | 0 |
| Slc25a4       | 2  | 0 | 0 | 0 |
| Stox2         | 4  | 0 | 0 | 0 |
| D030016E14Rik | 3  | 0 | 0 | 0 |
| Gm8623        | 1  | 0 | 0 | 0 |
| Ing2          | 3  | 0 | 0 | 0 |
| Cdkn2aip      | 2  | 0 | 0 | 0 |
| Wwc2          | 4  | 0 | 0 | 0 |
| Spcs3         | 4  | 0 | 0 | 0 |
| Sap30         | 1  | 0 | 0 | 0 |
| Galnt7        | 4  | 0 | 0 | 0 |
| Galnt6        | 4  | 0 | 0 | 0 |
| Clcn3         | 6  | 0 | 0 | 0 |
| Palld         | 8  | 0 | 0 | 0 |
| Cpe           | 2  | 0 | 0 | 0 |
| Sc4mol        | 3  | 0 | 0 | 0 |
| Klhl2         | 2  | 0 | 0 | 0 |
| 1810029B16Rik | 2  | 0 | 0 | 0 |
| Gm9755        | 1  | 0 | 0 | 0 |
| Psd3          | 6  | 0 | 0 | 0 |
| Csgalnact1    | 6  | 0 | 0 | 0 |
| Slc18a1       | 4  | 0 | 0 | 0 |
| Lzts1         | 4  | 0 | 0 | 0 |
| AK034302      | 4  | 0 | 0 | 0 |
| Zfp866        | 6  | 0 | 0 | 0 |
| Ndufa13       | 3  | 0 | 0 | 0 |
| Gatad2a       | 11 | 0 | 0 | 0 |
| Mau2          | 3  | 0 | 0 | 0 |
| Ncan          | 4  | 0 | 0 | 0 |
| Rfxank        | 2  | 0 | 0 | 0 |
| Slc25a42      | 2  | 0 | 0 | 0 |
| Armc6         | 4  | 0 | 0 | 0 |
| Ddx49         | 1  | 0 | 0 | 0 |
| Crtc1         | 8  | 0 | 0 | 0 |
| Klhl26        | 5  | 0 | 0 | 0 |

|               |    |   |   |   |
|---------------|----|---|---|---|
| Tmem59l       | 3  | 0 | 0 | 0 |
| 2810428l15Rik | 3  | 0 | 0 | 0 |
| Ssbp4         | 7  | 0 | 0 | 0 |
| Pgpep1        | 2  | 0 | 0 | 0 |
| Mpv17l2       | 2  | 0 | 0 | 0 |
| Arrdc2        | 7  | 0 | 0 | 0 |
| Kcnn1         | 10 | 0 | 0 | 0 |
| Ccdc124       | 4  | 0 | 0 | 0 |
| Slc5a5        | 3  | 0 | 0 | 0 |
| Haus8         | 4  | 0 | 0 | 0 |
| Nr2f6         | 3  | 0 | 0 | 0 |
| Ushbp1        | 9  | 0 | 0 | 0 |
| Abhd8         | 1  | 0 | 0 | 0 |
| Ano8          | 6  | 0 | 0 | 0 |
| Plvap         | 1  | 0 | 0 | 0 |
| Bst2          | 1  | 0 | 0 | 0 |
| Tmem221       | 4  | 0 | 0 | 0 |
| Unc13a        | 6  | 0 | 0 | 0 |
| Fcho1         | 8  | 0 | 0 | 0 |
| Eps15l1       | 11 | 0 | 0 | 0 |
| Cherp         | 5  | 0 | 0 | 0 |
| Slc35e1       | 1  | 0 | 0 | 0 |
| Med26         | 1  | 0 | 0 | 0 |
| Large         | 5  | 0 | 0 | 0 |
| Gm7901        | 1  | 0 | 0 | 0 |
| Arhgap10      | 4  | 0 | 0 | 0 |
| Tmem184c      | 3  | 0 | 0 | 0 |
| Ednra         | 3  | 0 | 0 | 0 |
| Pou4f2        | 2  | 0 | 0 | 0 |
| Rbmxt         | 4  | 0 | 0 | 0 |
| Lsm6          | 5  | 0 | 0 | 0 |
| Mmaa          | 9  | 0 | 0 | 0 |
| Smad1         | 6  | 0 | 0 | 0 |
| Abce1         | 3  | 0 | 0 | 0 |
| Gm5909        | 1  | 0 | 0 | 0 |
| Smarca5       | 5  | 0 | 0 | 0 |
| Gab1          | 7  | 0 | 0 | 0 |
| Usp38         | 3  | 0 | 0 | 0 |
| Il15          | 5  | 0 | 0 | 0 |
| Elmod2        | 3  | 0 | 0 | 0 |
| Scoc          | 6  | 0 | 0 | 0 |
| Tecr          | 9  | 0 | 0 | 0 |
| Pkn1          | 4  | 0 | 0 | 0 |
| AK134933      | 4  | 0 | 0 | 0 |
| AK008705      | 3  | 0 | 0 | 0 |
| Cc2d1a        | 5  | 0 | 0 | 0 |
| Nanos3        | 2  | 0 | 0 | 0 |

|               |   |   |   |   |
|---------------|---|---|---|---|
| Zswim4        | 3 | 0 | 0 | 0 |
| Mri1          | 4 | 0 | 0 | 0 |
| Ier2          | 1 | 0 | 0 | 0 |
| Nacc1         | 4 | 0 | 0 | 0 |
| Calr          | 1 | 0 | 0 | 0 |
| Gcdh          | 4 | 0 | 0 | 0 |
| Mast1         | 5 | 0 | 0 | 0 |
| Rnaseh2a      | 2 | 0 | 0 | 0 |
| Asna1         | 1 | 0 | 0 | 0 |
| Wdr83         | 3 | 0 | 0 | 0 |
| 4921524J17Rik | 3 | 0 | 0 | 0 |
| Dnaja2        | 1 | 0 | 0 | 0 |
| Neto2         | 6 | 0 | 0 | 0 |
| Irfg1         | 3 | 0 | 0 | 0 |
| Siah1a        | 3 | 0 | 0 | 0 |
| N4bp1         | 4 | 0 | 0 | 0 |
| Cbln1         | 2 | 0 | 0 | 0 |
| Zfp423        | 8 | 0 | 0 | 0 |
| Brd7          | 3 | 0 | 0 | 0 |
| Tox3          | 3 | 0 | 0 | 0 |
| XLOC_032955   | 1 | 0 | 0 | 0 |
| Aktip         | 5 | 0 | 0 | 0 |
| Irx3          | 1 | 0 | 0 | 0 |
| Gm16615       | 1 | 0 | 0 | 0 |
| Amfr          | 3 | 0 | 0 | 0 |
| Nudt21        | 3 | 0 | 0 | 0 |
| Bbs2          | 4 | 0 | 0 | 0 |
| Fam192a       | 5 | 0 | 0 | 0 |
| Pllp          | 1 | 0 | 0 | 0 |
| Ciapi1        | 4 | 0 | 0 | 0 |
| Dok4          | 6 | 0 | 0 | 0 |
| Ccdc102a      | 5 | 0 | 0 | 0 |
| Kifc3         | 4 | 0 | 0 | 0 |
| Zfp319        | 2 | 0 | 0 | 0 |
| Gtl3          | 4 | 0 | 0 | 0 |
| Csnk2a2       | 4 | 0 | 0 | 0 |
| Cnot1         | 9 | 0 | 0 | 0 |
| Slc38a7       | 3 | 0 | 0 | 0 |
| Got2          | 6 | 0 | 0 | 0 |
| Cdh8          | 6 | 0 | 0 | 0 |
| Cdh11         | 8 | 0 | 0 | 0 |
| Gm8730        | 1 | 0 | 0 | 0 |
| XLOC_032992   | 6 | 0 | 0 | 0 |
| Cmtm4         | 1 | 0 | 0 | 0 |
| Dync1li2      | 7 | 0 | 0 | 0 |
| Nae1          | 2 | 0 | 0 | 0 |
| Fam96b        | 3 | 0 | 0 | 0 |



|               |   |   |   |   |
|---------------|---|---|---|---|
| B3gnt9-ps     | 2 | 0 | 0 | 0 |
| Tradd         | 7 | 0 | 0 | 0 |
| Kctd19        | 6 | 0 | 0 | 0 |
| Tppp3         | 3 | 0 | 0 | 0 |
| Acd           | 3 | 0 | 0 | 0 |
| Ctrl          | 2 | 0 | 0 | 0 |
| Psmb10        | 5 | 0 | 0 | 0 |
| Chtf8         | 3 | 0 | 0 | 0 |
| Cog8          | 2 | 0 | 0 | 0 |
| Terf2         | 5 | 0 | 0 | 0 |
| Nqo1          | 2 | 0 | 0 | 0 |
| Nob1          | 3 | 0 | 0 | 0 |
| Rps26-ps1     | 1 | 0 | 0 | 0 |
| Psm7          | 2 | 0 | 0 | 0 |
| AK042944      | 6 | 0 | 0 | 0 |
| Gm1943        | 1 | 0 | 0 | 0 |
| Dhx38         | 3 | 0 | 0 | 0 |
| Hp            | 1 | 0 | 0 | 0 |
| Dhodh         | 4 | 0 | 0 | 0 |
| 2400003C14Rik | 6 | 0 | 0 | 0 |
| Atxn1l        | 7 | 0 | 0 | 0 |
| Il34          | 4 | 0 | 0 | 0 |
| Sf3b3         | 1 | 0 | 0 | 0 |
| Ddx19b        | 2 | 0 | 0 | 0 |
| AK020517      | 2 | 0 | 0 | 0 |
| Glg1          | 2 | 0 | 0 | 0 |
| Rfwd3         | 3 | 0 | 0 | 0 |
| Mkl           | 7 | 0 | 0 | 0 |
| Fa2h          | 3 | 0 | 0 | 0 |
| Wdr59         | 4 | 0 | 0 | 0 |
| Ldhd          | 1 | 0 | 0 | 0 |
| Bcar1         | 5 | 0 | 0 | 0 |
| Cfdp1         | 1 | 0 | 0 | 0 |
| Chst5         | 2 | 0 | 0 | 0 |
| Tmem231       | 4 | 0 | 0 | 0 |
| Adat1         | 4 | 0 | 0 | 0 |
| Kars          | 4 | 0 | 0 | 0 |
| Maf           | 1 | 0 | 0 | 0 |
| Cdyl2         | 2 | 0 | 0 | 0 |
| Gcsh          | 5 | 0 | 0 | 0 |
| Sdr42e1       | 3 | 0 | 0 | 0 |
| Mbtps1        | 5 | 0 | 0 | 0 |
| Hsd1l         | 6 | 0 | 0 | 0 |
| Taf1c         | 4 | 0 | 0 | 0 |
| 4632415K11Rik | 2 | 0 | 0 | 0 |
| Cotl1         | 1 | 0 | 0 | 0 |
| AK039624      | 5 | 0 | 0 | 0 |

|                    |    |   |   |   |
|--------------------|----|---|---|---|
| Gins2              | 1  | 0 | 0 | 0 |
| XLOC_033092        | 2  | 0 | 0 | 0 |
| Cox4nb             | 1  | 0 | 0 | 0 |
| AK087264           | 7  | 0 | 0 | 0 |
| Mthfsd             | 9  | 0 | 0 | 0 |
| Fbxo31             | 8  | 0 | 0 | 0 |
| Zcchc14            | 8  | 0 | 0 | 0 |
| Slc7a5             | 2  | 0 | 0 | 0 |
| Cyba               | 1  | 0 | 0 | 0 |
| Mvd                | 1  | 0 | 0 | 0 |
| Rnf166             | 2  | 0 | 0 | 0 |
| Fam38a             | 10 | 0 | 0 | 0 |
| Aprt               | 2  | 0 | 0 | 0 |
| Cbfa2t3            | 5  | 0 | 0 | 0 |
| Ankrd11            | 4  | 0 | 0 | 0 |
| Chmp1a             | 1  | 0 | 0 | 0 |
| Spata2L            | 3  | 0 | 0 | 0 |
| Fanca              | 5  | 0 | 0 | 0 |
| Dbnidd1            | 1  | 0 | 0 | 0 |
| XLOC_033123        | 8  | 0 | 0 | 0 |
| Nup133             | 2  | 0 | 0 | 0 |
| Abcb10             | 2  | 0 | 0 | 0 |
| Taf5l              | 3  | 0 | 0 | 0 |
| Pgbd5              | 6  | 0 | 0 | 0 |
| Agt                | 4  | 0 | 0 | 0 |
| 2310022B05Rik      | 2  | 0 | 0 | 0 |
| Fam89a             | 2  | 0 | 0 | 0 |
| 2810004N23Rik      | 1  | 0 | 0 | 0 |
| Egln1              | 3  | 0 | 0 | 0 |
| Pcnxl2             | 7  | 0 | 0 | 0 |
| Irf2bp2            | 2  | 0 | 0 | 0 |
| Rbm34              | 3  | 0 | 0 | 0 |
| XLOC_032189        | 4  | 0 | 0 | 0 |
| XLOC_032199        | 2  | 0 | 0 | 0 |
| Mrps31             | 1  | 0 | 0 | 0 |
| Ppapdc1b           | 1  | 0 | 0 | 0 |
| ENSMUSG00000054427 | 1  | 0 | 0 | 0 |
| Lsm1               | 1  | 0 | 0 | 0 |
| XLOC_032244        | 1  | 0 | 0 | 0 |
| AI429214           | 1  | 0 | 0 | 0 |
| Sorbs2             | 9  | 0 | 0 | 0 |
| AK141659           | 7  | 0 | 0 | 0 |
| Gmip               | 8  | 0 | 0 | 0 |
| Lpar2              | 3  | 0 | 0 | 0 |
| Comp               | 2  | 0 | 0 | 0 |
| Isyna1             | 4  | 0 | 0 | 0 |
| XLOC_032353        | 3  | 0 | 0 | 0 |

|               |    |   |   |   |
|---------------|----|---|---|---|
| XLOC_032364   | 1  | 0 | 0 | 0 |
| Dda1          | 1  | 0 | 0 | 0 |
| Klf2          | 1  | 0 | 0 | 0 |
| XLOC_032386   | 1  | 0 | 0 | 0 |
| Sin3b         | 4  | 0 | 0 | 0 |
| XLOC_032389   | 1  | 0 | 0 | 0 |
| XLOC_032393   | 1  | 0 | 0 | 0 |
| Slc10a7       | 4  | 0 | 0 | 0 |
| Rnf150        | 3  | 0 | 0 | 0 |
| Dnajb1        | 4  | 0 | 0 | 0 |
| Ptger1        | 3  | 0 | 0 | 0 |
| Prkaca        | 2  | 0 | 0 | 0 |
| Dnase2a       | 5  | 0 | 0 | 0 |
| Fbxw9         | 1  | 0 | 0 | 0 |
| BC056474      | 1  | 0 | 0 | 0 |
| Ccdc113       | 1  | 0 | 0 | 0 |
| XLOC_032497   | 3  | 0 | 0 | 0 |
| 4930513N10Rik | 1  | 0 | 0 | 0 |
| Ces4a         | 1  | 0 | 0 | 0 |
| Cbfb          | 13 | 0 | 0 | 0 |
| Fbxl8         | 1  | 0 | 0 | 0 |
| Hsf4          | 3  | 0 | 0 | 0 |
| Nol3          | 2  | 0 | 0 | 0 |
| Ctcf          | 3  | 0 | 0 | 0 |
| XLOC_032528   | 1  | 0 | 0 | 0 |
| Nip7          | 1  | 0 | 0 | 0 |
| XLOC_032552   | 3  | 0 | 0 | 0 |
| Txn14b        | 2  | 0 | 0 | 0 |
| mKIAA1990     | 4  | 0 | 0 | 0 |
| Dynlrb2       | 1  | 0 | 0 | 0 |
| Bcmo1         | 5  | 0 | 0 | 0 |
| 6430548M08Rik | 1  | 0 | 0 | 0 |
| XLOC_032601   | 2  | 0 | 0 | 0 |
| Foxf1a        | 1  | 0 | 0 | 0 |
| XLOC_032610   | 1  | 0 | 0 | 0 |
| 4732415M23Rik | 3  | 0 | 0 | 0 |
| Arv1          | 7  | 0 | 0 | 0 |
| XLOC_032680   | 1  | 0 | 0 | 0 |
| Htra4         | 1  | 0 | 0 | 0 |
| C330021F23Rik | 1  | 0 | 0 | 0 |
| Letm2         | 8  | 0 | 0 | 0 |
| Hook3         | 3  | 0 | 0 | 0 |
| XLOC_032748   | 1  | 0 | 0 | 0 |
| Nrg1          | 7  | 0 | 0 | 0 |
| BC088983      | 8  | 0 | 0 | 0 |
| XLOC_032832   | 3  | 0 | 0 | 0 |
| Zfp868        | 2  | 0 | 0 | 0 |

|               |    |   |   |   |
|---------------|----|---|---|---|
| Zfp869        | 3  | 0 | 0 | 0 |
| Zfp963        | 1  | 0 | 0 | 0 |
| Gdf15         | 1  | 0 | 0 | 0 |
| Pik3r2        | 6  | 0 | 0 | 0 |
| B3gnt3        | 2  | 0 | 0 | 0 |
| Calr3         | 3  | 0 | 0 | 0 |
| Rad23a        | 4  | 0 | 0 | 0 |
| Gm5741        | 1  | 0 | 0 | 0 |
| Zfp791        | 3  | 0 | 0 | 0 |
| Snx20         | 1  | 0 | 0 | 0 |
| Gm5356        | 1  | 0 | 0 | 0 |
| Rpgrip1l      | 6  | 0 | 0 | 0 |
| 4933436C20Rik | 1  | 0 | 0 | 0 |
| XLOC_032964   | 9  | 0 | 0 | 0 |
| Tk2           | 3  | 0 | 0 | 0 |
| Rrad          | 3  | 0 | 0 | 0 |
| Lrrc29        | 10 | 0 | 0 | 0 |
| Atp6v0d1      | 3  | 0 | 0 | 0 |
| Ranbp10       | 6  | 0 | 0 | 0 |
| Ddx19a        | 1  | 0 | 0 | 0 |
| AK053982      | 1  | 0 | 0 | 0 |
| Mphosph6      | 4  | 0 | 0 | 0 |
| Zdhhc7        | 7  | 0 | 0 | 0 |
| XLOC_033119   | 4  | 0 | 0 | 0 |
| 1700054N08Rik | 5  | 0 | 0 | 0 |
| Acta1         | 1  | 0 | 0 | 0 |
| Ttc13         | 8  | 0 | 0 | 0 |
| XLOC_033134   | 1  | 0 | 0 | 0 |
| XLOC_033140   | 1  | 0 | 0 | 0 |
| Tomm20        | 3  | 0 | 0 | 0 |
| Ccl25         | 7  | 0 | 0 | 0 |
| Zfp958        | 2  | 0 | 0 | 0 |
| Myom2         | 2  | 0 | 0 | 0 |
| Purg          | 1  | 0 | 0 | 0 |
| XLOC_032248   | 2  | 0 | 0 | 0 |
| XLOC_032263   | 1  | 0 | 0 | 0 |
| XLOC_032293   | 1  | 0 | 0 | 0 |
| Hmgb2         | 1  | 0 | 0 | 0 |
| Aadat         | 2  | 0 | 0 | 0 |
| XLOC_032307   | 4  | 0 | 0 | 0 |
| Glt25d1       | 2  | 0 | 0 | 0 |
| AK041972      | 2  | 0 | 0 | 0 |
| Anapc10       | 4  | 0 | 0 | 0 |
| XLOC_032444   | 1  | 0 | 0 | 0 |
| XLOC_032446   | 1  | 0 | 0 | 0 |
| XLOC_032461   | 1  | 0 | 0 | 0 |
| Ces7          | 1  | 0 | 0 | 0 |

|               |   |   |   |   |
|---------------|---|---|---|---|
| XLOC_032481   | 1 | 0 | 0 | 0 |
| Ccl22         | 2 | 0 | 0 | 0 |
| Gpr97         | 7 | 0 | 0 | 0 |
| XLOC_032508   | 1 | 0 | 0 | 0 |
| Lrrc36        | 2 | 0 | 0 | 0 |
| XLOC_032551   | 1 | 0 | 0 | 0 |
| Hydin         | 2 | 0 | 0 | 0 |
| XLOC_032620   | 1 | 0 | 0 | 0 |
| XLOC_032635   | 2 | 0 | 0 | 0 |
| XLOC_032648   | 1 | 0 | 0 | 0 |
| XLOC_032657   | 1 | 0 | 0 | 0 |
| Gm7461        | 1 | 0 | 0 | 0 |
| Slc10a2       | 1 | 0 | 0 | 0 |
| Atp7b         | 2 | 0 | 0 | 0 |
| 4930448N21Rik | 1 | 0 | 0 | 0 |
| Npy5r         | 2 | 0 | 0 | 0 |
| Abcc12        | 2 | 0 | 0 | 0 |
| XLOC_032956   | 1 | 0 | 0 | 0 |
| Ces5a         | 3 | 0 | 0 | 0 |
| Ccdc79        | 2 | 0 | 0 | 0 |
| Slc7a6os      | 2 | 0 | 0 | 0 |
| XLOC_033041   | 1 | 0 | 0 | 0 |
| Clec18a       | 1 | 0 | 0 | 0 |
| Slc38a8       | 3 | 0 | 0 | 0 |
| Sult5a1       | 5 | 0 | 0 | 0 |
| Tarbp1        | 3 | 0 | 0 | 0 |
| XLOC_032169   | 1 | 0 | 0 | 0 |
| XLOC_032229   | 1 | 0 | 0 | 0 |
| Enpp6         | 1 | 0 | 0 | 0 |
| XLOC_032317   | 1 | 0 | 0 | 0 |
| Ankle1        | 1 | 0 | 0 | 0 |
| Fam129c       | 7 | 0 | 0 | 0 |
| Zfp882        | 1 | 0 | 0 | 0 |
| XLOC_032374   | 1 | 0 | 0 | 0 |
| mszf37        | 1 | 0 | 0 | 0 |
| XLOC_032377   | 1 | 0 | 0 | 0 |
| XLOC_032388   | 2 | 0 | 0 | 0 |
| XLOC_032400   | 2 | 0 | 0 | 0 |
| XLOC_032475   | 1 | 0 | 0 | 0 |
| XLOC_032558   | 2 | 0 | 0 | 0 |
| XLOC_032636   | 2 | 0 | 0 | 0 |
| AK086660      | 1 | 0 | 0 | 0 |
| Gm6524        | 1 | 0 | 0 | 0 |
| Adam32        | 3 | 0 | 0 | 0 |
| Adrb3         | 2 | 0 | 0 | 0 |
| XLOC_032757   | 1 | 0 | 0 | 0 |
| XLOC_032828   | 1 | 0 | 0 | 0 |

|               |   |   |   |   |
|---------------|---|---|---|---|
| Cyp4f18       | 3 | 0 | 0 | 0 |
| Cib3          | 2 | 0 | 0 | 0 |
| AK039159      | 2 | 0 | 0 | 0 |
| AK039837      | 1 | 0 | 0 | 0 |
| Agrp          | 1 | 0 | 0 | 0 |
| AK076897      | 2 | 0 | 0 | 0 |
| XLOC_033064   | 1 | 0 | 0 | 0 |
| 1700030J22Rik | 2 | 0 | 0 | 0 |
| XLOC_032141   | 1 | 0 | 0 | 0 |
| XLOC_032306   | 1 | 0 | 0 | 0 |
| XLOC_032329   | 2 | 0 | 0 | 0 |
| Ucp1          | 1 | 0 | 0 | 0 |
| XLOC_032445   | 1 | 0 | 0 | 0 |
| XLOC_032499   | 1 | 0 | 0 | 0 |
| XLOC_032570   | 1 | 0 | 0 | 0 |
| XLOC_032571   | 2 | 0 | 0 | 0 |
| XLOC_032582   | 2 | 0 | 0 | 0 |
| XLOC_032607   | 1 | 0 | 0 | 0 |
| XLOC_032738   | 2 | 0 | 0 | 0 |
| XLOC_032756   | 1 | 0 | 0 | 0 |
| Cnot7         | 1 | 0 | 0 | 0 |
| Gm7697        | 1 | 0 | 0 | 0 |
| XLOC_032849   | 1 | 0 | 0 | 0 |
| 4931428F04Rik | 1 | 0 | 0 | 0 |
| Fhod1         | 1 | 0 | 0 | 0 |
| E130303B06Rik | 2 | 0 | 0 | 0 |
| Chst4         | 1 | 0 | 0 | 0 |
| XLOC_033112   | 1 | 0 | 0 | 0 |
| AK162519      | 1 | 0 | 0 | 0 |
| XLOC_032238   | 1 | 0 | 0 | 0 |
| XLOC_032271   | 1 | 0 | 0 | 0 |
| Asb5          | 1 | 0 | 0 | 0 |
| AK084432      | 2 | 0 | 0 | 0 |
| XLOC_032354   | 1 | 0 | 0 | 0 |
| AK085371      | 1 | 0 | 0 | 0 |
| Ndufb7        | 1 | 0 | 0 | 0 |
| 1700067K01Rik | 1 | 0 | 0 | 0 |
| XLOC_032430   | 1 | 0 | 0 | 0 |
| A330008L17Rik | 1 | 0 | 0 | 0 |
| Foxc2         | 1 | 0 | 0 | 0 |
| XLOC_032618   | 1 | 0 | 0 | 0 |
| AK013187      | 1 | 0 | 0 | 0 |
| Cd209f        | 1 | 0 | 0 | 0 |
| XLOC_032776   | 1 | 0 | 0 | 0 |
| 2810422J05Rik | 1 | 0 | 0 | 0 |
| Ifi30         | 1 | 0 | 0 | 0 |
| Il27ra        | 2 | 0 | 0 | 0 |

|               |    |   |   |   |
|---------------|----|---|---|---|
| Cngb1         | 1  | 0 | 0 | 0 |
| Zdhhc1        | 5  | 0 | 0 | 0 |
| AK086852      | 1  | 0 | 0 | 0 |
| Dpep2         | 1  | 0 | 0 | 0 |
| XLOC_033021   | 1  | 0 | 0 | 0 |
| AK038784      | 1  | 0 | 0 | 0 |
| Alkbh8        | 7  | 0 | 0 | 0 |
| Cwf19l2       | 3  | 0 | 0 | 0 |
| Gucy1a2       | 1  | 0 | 0 | 0 |
| Kbtbd3        | 3  | 0 | 0 | 0 |
| 8430410K20Rik | 3  | 0 | 0 | 0 |
| Casp1         | 4  | 0 | 0 | 0 |
| Casp4         | 6  | 0 | 0 | 0 |
| Casp12        | 2  | 0 | 0 | 0 |
| Dcun1d5       | 4  | 0 | 0 | 0 |
| Tmem123       | 2  | 0 | 0 | 0 |
| Trpc6         | 3  | 0 | 0 | 0 |
| Pgr           | 1  | 0 | 0 | 0 |
| Gm16485       | 1  | 0 | 0 | 0 |
| XLOC_034135   | 1  | 0 | 0 | 0 |
| Maml2         | 2  | 0 | 0 | 0 |
| Mtmr2         | 3  | 0 | 0 | 0 |
| Fam76b        | 6  | 0 | 0 | 0 |
| Sesn3         | 3  | 0 | 0 | 0 |
| Cwc15         | 3  | 0 | 0 | 0 |
| Mre11a        | 4  | 0 | 0 | 0 |
| 2200002K05Rik | 3  | 0 | 0 | 0 |
| Fn5           | 1  | 0 | 0 | 0 |
| Slc36a4       | 5  | 0 | 0 | 0 |
| Chordc1       | 2  | 0 | 0 | 0 |
| Zfp317        | 11 | 0 | 0 | 0 |
| Zfp846        | 6  | 0 | 0 | 0 |
| Ubl5          | 7  | 0 | 0 | 0 |
| Pin1          | 2  | 0 | 0 | 0 |
| A230050P20Rik | 4  | 0 | 0 | 0 |
| Ppan          | 4  | 0 | 0 | 0 |
| Mrpl4         | 2  | 0 | 0 | 0 |
| Atg4d         | 1  | 0 | 0 | 0 |
| Ilf3          | 6  | 0 | 0 | 0 |
| Qtrt1         | 5  | 0 | 0 | 0 |
| Dnm2          | 9  | 0 | 0 | 0 |
| AB124611      | 2  | 0 | 0 | 0 |
| Hide1         | 1  | 0 | 0 | 0 |
| Carm1         | 4  | 0 | 0 | 0 |
| Smarca4       | 6  | 0 | 0 | 0 |
| Ldlr          | 1  | 0 | 0 | 0 |
| Ccdc159       | 4  | 0 | 0 | 0 |

|               |       |   |   |   |   |
|---------------|-------|---|---|---|---|
| 2310047B19Rik |       | 1 | 0 | 0 | 0 |
| Pigyl         |       | 1 | 0 | 0 | 0 |
| Zfp809        |       | 4 | 0 | 0 | 0 |
| 9530077C05Rik |       | 2 | 0 | 0 | 0 |
| Bmper         |       | 4 | 0 | 0 | 0 |
|               | 41889 | 4 | 0 | 0 | 0 |
| Eepd1         |       | 5 | 0 | 0 | 0 |
| Thyn1         |       | 4 | 0 | 0 | 0 |
| Igsf9b        |       | 4 | 0 | 0 | 0 |
| XLOC_034190   |       | 1 | 0 | 0 | 0 |
| Snx19         |       | 2 | 0 | 0 | 0 |
| Adamts8       |       | 2 | 0 | 0 | 0 |
| Zbtb44        |       | 4 | 0 | 0 | 0 |
| Nfrkb         |       | 9 | 0 | 0 | 0 |
| XLOC_034198   |       | 1 | 0 | 0 | 0 |
| Ets1          |       | 5 | 0 | 0 | 0 |
| Kirrel3       |       | 4 | 0 | 0 | 0 |
| Srpr          |       | 4 | 0 | 0 | 0 |
| Rpusd4        |       | 2 | 0 | 0 | 0 |
| Pate2         |       | 2 | 0 | 0 | 0 |
| Fez1          |       | 8 | 0 | 0 | 0 |
| Tmem218       |       | 2 | 0 | 0 | 0 |
| Hepacam       |       | 3 | 0 | 0 | 0 |
| XLOC_034217   |       | 1 | 0 | 0 | 0 |
| BC024479      |       | 6 | 0 | 0 | 0 |
| Esam          |       | 6 | 0 | 0 | 0 |
| Siae          |       | 2 | 0 | 0 | 0 |
| Vwa5a         |       | 4 | 0 | 0 | 0 |
| Zfp202        |       | 7 | 0 | 0 | 0 |
| Scn3b         |       | 5 | 0 | 0 | 0 |
| 9030425E11Rik |       | 3 | 0 | 0 | 0 |
| XLOC_034229   |       | 4 | 0 | 0 | 0 |
| 2610203C20Rik |       | 3 | 0 | 0 | 0 |
| XLOC_034230   |       | 2 | 0 | 0 | 0 |
| XLOC_034235   |       | 1 | 0 | 0 | 0 |
| XLOC_034236   |       | 4 | 0 | 0 | 0 |
| Pvrl1         |       | 1 | 0 | 0 | 0 |
| XLOC_034240   |       | 1 | 0 | 0 | 0 |
| Thy1          |       | 2 | 0 | 0 | 0 |
| Usp2          |       | 4 | 0 | 0 | 0 |
| C1qtnf5       |       | 2 | 0 | 0 | 0 |
| AK134203      |       | 2 | 0 | 0 | 0 |
| Mcam          |       | 5 | 0 | 0 | 0 |
| Dpagt1        |       | 1 | 0 | 0 | 0 |
| Hyou1         |       | 3 | 0 | 0 | 0 |
| Slc37a4       |       | 6 | 0 | 0 | 0 |
| Rps25         |       | 2 | 0 | 0 | 0 |



|               |    |   |   |   |
|---------------|----|---|---|---|
| Gm9830        | 1  | 0 | 0 | 0 |
| AK078316      | 3  | 0 | 0 | 0 |
| Bcl9l         | 6  | 0 | 0 | 0 |
| Ift46         | 7  | 0 | 0 | 0 |
| Mpzl3         | 1  | 0 | 0 | 0 |
| Scn4b         | 8  | 0 | 0 | 0 |
| BC049352      | 1  | 0 | 0 | 0 |
| Fxyd6         | 6  | 0 | 0 | 0 |
| Fxyd2         | 1  | 0 | 0 | 0 |
| Dscaml1       | 5  | 0 | 0 | 0 |
| Sik3          | 6  | 0 | 0 | 0 |
| Zfp259        | 4  | 0 | 0 | 0 |
| Bud13         | 6  | 0 | 0 | 0 |
| 2900052N01Rik | 6  | 0 | 0 | 0 |
| Cadm1         | 12 | 0 | 0 | 0 |
| Fam55d        | 4  | 0 | 0 | 0 |
| Usp28         | 3  | 0 | 0 | 0 |
| Zw10          | 4  | 0 | 0 | 0 |
| Tmprss5       | 9  | 0 | 0 | 0 |
| 1600029D21Rik | 2  | 0 | 0 | 0 |
| Il18          | 2  | 0 | 0 | 0 |
| Alg9          | 2  | 0 | 0 | 0 |
| Ppp2r1b       | 2  | 0 | 0 | 0 |
| Arhgap20      | 5  | 0 | 0 | 0 |
| Rdx           | 1  | 0 | 0 | 0 |
| Kdelc2        | 3  | 0 | 0 | 0 |
| 4930550C14Rik | 7  | 0 | 0 | 0 |
| Slc35f2       | 6  | 0 | 0 | 0 |
| Idh3a         | 3  | 0 | 0 | 0 |
| Dnaja4        | 3  | 0 | 0 | 0 |
| Crabp1        | 1  | 0 | 0 | 0 |
| Ireb2         | 6  | 0 | 0 | 0 |
| Agphd1        | 5  | 0 | 0 | 0 |
| Psm4          | 6  | 0 | 0 | 0 |
| Ube2q2        | 8  | 0 | 0 | 0 |
| Fbxo22        | 2  | 0 | 0 | 0 |
| Isl2          | 2  | 0 | 0 | 0 |
| XLOC_034312   | 1  | 0 | 0 | 0 |
| Pstpip1       | 3  | 0 | 0 | 0 |
| Hmg20a        | 2  | 0 | 0 | 0 |
| Snupn         | 2  | 0 | 0 | 0 |
| Ptpn9         | 4  | 0 | 0 | 0 |
| Sin3a         | 4  | 0 | 0 | 0 |
| Man2c1        | 8  | 0 | 0 | 0 |
| Gm6166        | 1  | 0 | 0 | 0 |
| Cox5a         | 5  | 0 | 0 | 0 |
| 2310046O06Rik | 2  | 0 | 0 | 0 |

|               |    |   |   |   |
|---------------|----|---|---|---|
| Scamp2        | 1  | 0 | 0 | 0 |
| Ulk3          | 6  | 0 | 0 | 0 |
| Ubl7          | 6  | 0 | 0 | 0 |
| 1600029O15Rik | 1  | 0 | 0 | 0 |
| 6030419C18Rik | 1  | 0 | 0 | 0 |
| Nptn          | 6  | 0 | 0 | 0 |
| Hcn4          | 2  | 0 | 0 | 0 |
| Hexa          | 4  | 0 | 0 | 0 |
| Celf6         | 5  | 0 | 0 | 0 |
| Parp6         | 7  | 0 | 0 | 0 |
| Pkm2          | 7  | 0 | 0 | 0 |
| Gramd2        | 5  | 0 | 0 | 0 |
| Myo9a         | 3  | 0 | 0 | 0 |
| Larp6         | 2  | 0 | 0 | 0 |
| Uaca          | 14 | 0 | 0 | 0 |
| Tle3          | 8  | 0 | 0 | 0 |
| XLOC_034355   | 1  | 0 | 0 | 0 |
| Anp32a        | 5  | 0 | 0 | 0 |
| Itga11        | 4  | 0 | 0 | 0 |
| Cln6          | 2  | 0 | 0 | 0 |
| Calml4        | 2  | 0 | 0 | 0 |
| Aagab         | 3  | 0 | 0 | 0 |
| Rpl4          | 4  | 0 | 0 | 0 |
| Snpc5         | 1  | 0 | 0 | 0 |
| Tipin         | 3  | 0 | 0 | 0 |
| Dennd4a       | 3  | 0 | 0 | 0 |
| 2010321M09Rik | 2  | 0 | 0 | 0 |
| Dpp8          | 2  | 0 | 0 | 0 |
| Igdcc4        | 8  | 0 | 0 | 0 |
| Clpx          | 4  | 0 | 0 | 0 |
| Pdcd7         | 2  | 0 | 0 | 0 |
| Gm514         | 7  | 0 | 0 | 0 |
| Rasl12        | 4  | 0 | 0 | 0 |
| Mtfmt         | 6  | 0 | 0 | 0 |
| Oaz2-ps       | 1  | 0 | 0 | 0 |
| Csnk1g1       | 7  | 0 | 0 | 0 |
| Ppib          | 1  | 0 | 0 | 0 |
| Dapk2         | 1  | 0 | 0 | 0 |
| Herc1         | 8  | 0 | 0 | 0 |
| Car12         | 2  | 0 | 0 | 0 |
| Rps27l        | 2  | 0 | 0 | 0 |
| Anxa2         | 3  | 0 | 0 | 0 |
| Bnip2         | 5  | 0 | 0 | 0 |
| Gtf2a2        | 3  | 0 | 0 | 0 |
| Sltm          | 9  | 0 | 0 | 0 |
| Adam10        | 3  | 0 | 0 | 0 |
| Gm3436        | 1  | 0 | 0 | 0 |

|             |    |   |   |   |
|-------------|----|---|---|---|
| Zfp280d     | 2  | 0 | 0 | 0 |
| Mns1        | 2  | 0 | 0 | 0 |
| Rfx7        | 4  | 0 | 0 | 0 |
| Nedd4       | 6  | 0 | 0 | 0 |
| Pygo1       | 1  | 0 | 0 | 0 |
| Dyx1c1      | 6  | 0 | 0 | 0 |
| Ccpg1       | 6  | 0 | 0 | 0 |
| Rab27a      | 4  | 0 | 0 | 0 |
| Rsl24d1     | 3  | 0 | 0 | 0 |
| BC031353    | 7  | 0 | 0 | 0 |
| Arpp19      | 4  | 0 | 0 | 0 |
| Myo5a       | 3  | 0 | 0 | 0 |
| Leo1        | 3  | 0 | 0 | 0 |
| Lysmd2      | 3  | 0 | 0 | 0 |
| Bmp5        | 2  | 0 | 0 | 0 |
| Hmgcll1     | 4  | 0 | 0 | 0 |
| Gclc        | 5  | 0 | 0 | 0 |
| Ick         | 4  | 0 | 0 | 0 |
| AK050586    | 9  | 0 | 0 | 0 |
| Gsta4       | 2  | 0 | 0 | 0 |
| Mto1        | 2  | 0 | 0 | 0 |
| Cd109       | 3  | 0 | 0 | 0 |
| Senp6       | 9  | 0 | 0 | 0 |
| Myo6        | 10 | 0 | 0 | 0 |
| XLOC_034442 | 1  | 0 | 0 | 0 |
| AK082555    | 1  | 0 | 0 | 0 |
| AK052495    | 4  | 0 | 0 | 0 |
| Mei4        | 3  | 0 | 0 | 0 |
| Sh3bgrl2    | 4  | 0 | 0 | 0 |
| Bckdhb      | 2  | 0 | 0 | 0 |
| Dopey1      | 5  | 0 | 0 | 0 |
| Prss35      | 3  | 0 | 0 | 0 |
| Cyb5r4      | 7  | 0 | 0 | 0 |
| XLOC_034460 | 1  | 0 | 0 | 0 |
| XLOC_034461 | 2  | 0 | 0 | 0 |
| Nt5e        | 2  | 0 | 0 | 0 |
| Zfp949      | 2  | 0 | 0 | 0 |
| Mthfs       | 4  | 0 | 0 | 0 |
| Rasgrf1     | 6  | 0 | 0 | 0 |
| Plscr2      | 3  | 0 | 0 | 0 |
| Plscr4      | 3  | 0 | 0 | 0 |
| Plod2       | 5  | 0 | 0 | 0 |
| Slc9a9      | 6  | 0 | 0 | 0 |
| Pcolce2     | 3  | 0 | 0 | 0 |
| Atr         | 2  | 0 | 0 | 0 |
| Xrn1        | 7  | 0 | 0 | 0 |
| Gk5         | 3  | 0 | 0 | 0 |

|               |    |   |   |   |
|---------------|----|---|---|---|
| Tfdp2         | 10 | 0 | 0 | 0 |
| AK089981      | 5  | 0 | 0 | 0 |
| Gm10123       | 1  | 0 | 0 | 0 |
| Rbp1          | 1  | 0 | 0 | 0 |
| Copb2         | 4  | 0 | 0 | 0 |
| Faim          | 2  | 0 | 0 | 0 |
| Dbr1          | 2  | 0 | 0 | 0 |
| Dzip1l        | 7  | 0 | 0 | 0 |
| Stag1         | 5  | 0 | 0 | 0 |
| Msl2          | 1  | 0 | 0 | 0 |
| Ky            | 1  | 0 | 0 | 0 |
| Anapc13       | 3  | 0 | 0 | 0 |
| Amotl2        | 3  | 0 | 0 | 0 |
| Ryk           | 4  | 0 | 0 | 0 |
| Slco2a1       | 5  | 0 | 0 | 0 |
| XLOC_034514   | 1  | 0 | 0 | 0 |
| Rab6b         | 5  | 0 | 0 | 0 |
| Nphp3         | 10 | 0 | 0 | 0 |
| Acad11        | 2  | 0 | 0 | 0 |
| Cpne4         | 7  | 0 | 0 | 0 |
| Mrpl3         | 5  | 0 | 0 | 0 |
| Pik3r4        | 2  | 0 | 0 | 0 |
| Wdr82         | 3  | 0 | 0 | 0 |
| Twf2          | 1  | 0 | 0 | 0 |
| Poc1a         | 3  | 0 | 0 | 0 |
| Dusp7         | 1  | 0 | 0 | 0 |
| Rpl29         | 3  | 0 | 0 | 0 |
| Pcbp4         | 8  | 0 | 0 | 0 |
| Rrp9          | 3  | 0 | 0 | 0 |
| Vprbp         | 3  | 0 | 0 | 0 |
| 6430571L13Rik | 1  | 0 | 0 | 0 |
| Cacna2d2      | 10 | 0 | 0 | 0 |
| Tmem115       | 1  | 0 | 0 | 0 |
| Nprl2         | 4  | 0 | 0 | 0 |
| Tusc2         | 1  | 0 | 0 | 0 |
| Hyal2         | 2  | 0 | 0 | 0 |
| Ifrd2         | 3  | 0 | 0 | 0 |
| Mon1a         | 1  | 0 | 0 | 0 |
| Traip         | 8  | 0 | 0 | 0 |
| Uba7          | 6  | 0 | 0 | 0 |
| Ip6k1         | 8  | 0 | 0 | 0 |
| Gmppb         | 5  | 0 | 0 | 0 |
| Amt           | 4  | 0 | 0 | 0 |
| Rhoa          | 4  | 0 | 0 | 0 |
| Gpx1          | 2  | 0 | 0 | 0 |
| Usp4          | 2  | 0 | 0 | 0 |
| Ccdc71        | 1  | 0 | 0 | 0 |

|               |    |   |   |   |
|---------------|----|---|---|---|
| Lamb2         | 6  | 0 | 0 | 0 |
| Usp19         | 7  | 0 | 0 | 0 |
| Qars          | 3  | 0 | 0 | 0 |
| Qrich1        | 2  | 0 | 0 | 0 |
| Impdh2        | 6  | 0 | 0 | 0 |
| Slc25a20      | 1  | 0 | 0 | 0 |
| Prkar2a       | 2  | 0 | 0 | 0 |
| Ip6k2         | 2  | 0 | 0 | 0 |
| Celsr3        | 10 | 0 | 0 | 0 |
| Slc26a6       | 6  | 0 | 0 | 0 |
| Uqcrc1        | 2  | 0 | 0 | 0 |
| Col7a1        | 10 | 0 | 0 | 0 |
| Shisa5        | 4  | 0 | 0 | 0 |
| Ccdc51        | 3  | 0 | 0 | 0 |
| Cdc25a        | 3  | 0 | 0 | 0 |
| Mtap4         | 7  | 0 | 0 | 0 |
| Cspg5         | 2  | 0 | 0 | 0 |
| 2610002I17Rik | 1  | 0 | 0 | 0 |
| Scap          | 4  | 0 | 0 | 0 |
| Ccdc12        | 5  | 0 | 0 | 0 |
| Als2cl        | 12 | 0 | 0 | 0 |
| Lrrfip2       | 4  | 0 | 0 | 0 |
| Epm2aip1      | 2  | 0 | 0 | 0 |
| Trank1        | 5  | 0 | 0 | 0 |
| 2900079G21Rik | 1  | 0 | 0 | 0 |
| Clasp2        | 10 | 0 | 0 | 0 |
| Ubp1          | 1  | 0 | 0 | 0 |
| Glb1          | 2  | 0 | 0 | 0 |
| XLOC_034595   | 1  | 0 | 0 | 0 |
| Dync1li1      | 2  | 0 | 0 | 0 |
| Cmtm6         | 2  | 0 | 0 | 0 |
| Osbp10        | 10 | 0 | 0 | 0 |
| XLOC_034599   | 2  | 0 | 0 | 0 |
| XLOC_034601   | 2  | 0 | 0 | 0 |
| XLOC_034603   | 5  | 0 | 0 | 0 |
| Azi2          | 3  | 0 | 0 | 0 |
| XLOC_034607   | 3  | 0 | 0 | 0 |
| Itga9         | 2  | 0 | 0 | 0 |
| Ctdspl        | 4  | 0 | 0 | 0 |
| Vill          | 9  | 0 | 0 | 0 |
| Acaa1a        | 8  | 0 | 0 | 0 |
| Xylb          | 3  | 0 | 0 | 0 |
| Acvr2b        | 6  | 0 | 0 | 0 |
| Exog          | 5  | 0 | 0 | 0 |
| Wdr48         | 4  | 0 | 0 | 0 |
| Ttc21a        | 4  | 0 | 0 | 0 |
| Slc25a38      | 1  | 0 | 0 | 0 |

|               |    |   |   |   |
|---------------|----|---|---|---|
| Rpsa          | 10 | 0 | 0 | 0 |
| Myrip         | 5  | 0 | 0 | 0 |
| Eif1b         | 4  | 0 | 0 | 0 |
| Entpd3        | 2  | 0 | 0 | 0 |
| Rpl14         | 7  | 0 | 0 | 0 |
| Ctnnb1        | 5  | 0 | 0 | 0 |
| XLOC_034632   | 3  | 0 | 0 | 0 |
| Trak1         | 11 | 0 | 0 | 0 |
| XLOC_034635   | 2  | 0 | 0 | 0 |
| Deb1          | 4  | 0 | 0 | 0 |
| Kbtbd5        | 1  | 0 | 0 | 0 |
| 1700048O20Rik | 3  | 0 | 0 | 0 |
| Snrk          | 7  | 0 | 0 | 0 |
| Abhd5         | 5  | 0 | 0 | 0 |
| XLOC_034643   | 2  | 0 | 0 | 0 |
| 9530059O14Rik | 2  | 0 | 0 | 0 |
| D9Ertd402e    | 5  | 0 | 0 | 0 |
| Zfp105        | 3  | 0 | 0 | 0 |
| Kif15         | 6  | 0 | 0 | 0 |
| Lars2         | 2  | 0 | 0 | 0 |
| Sacm1l        | 1  | 0 | 0 | 0 |
| Ccr2          | 2  | 0 | 0 | 0 |
| Aasdhpt       | 3  | 0 | 0 | 0 |
| Gria4         | 6  | 0 | 0 | 0 |
| Yap1          | 3  | 0 | 0 | 0 |
| 9230110C19Rik | 3  | 0 | 0 | 0 |
| AK129341      | 7  | 0 | 0 | 0 |
| AK054106      | 1  | 0 | 0 | 0 |
| Arhgap42      | 4  | 0 | 0 | 0 |
| Cep57         | 1  | 0 | 0 | 0 |
| Endod1        | 3  | 0 | 0 | 0 |
| Amotl1        | 6  | 0 | 0 | 0 |
| Fut4          | 1  | 0 | 0 | 0 |
| Ankrd49       | 2  | 0 | 0 | 0 |
| Panx1         | 6  | 0 | 0 | 0 |
| Med17         | 1  | 0 | 0 | 0 |
| 4931406C07Rik | 1  | 0 | 0 | 0 |
| 5830418K08Rik | 5  | 0 | 0 | 0 |
| Ccdc67        | 1  | 0 | 0 | 0 |
| Fat3          | 10 | 0 | 0 | 0 |
| Zfp558        | 10 | 0 | 0 | 0 |
| Zfp560        | 4  | 0 | 0 | 0 |
| Zfp26         | 4  | 0 | 0 | 0 |
| Zfp426        | 8  | 0 | 0 | 0 |
| Olfm2         | 1  | 0 | 0 | 0 |
| Col5a3        | 11 | 0 | 0 | 0 |
| Angptl6       | 3  | 0 | 0 | 0 |

|               |    |   |   |   |
|---------------|----|---|---|---|
| Eif3g         | 1  | 0 | 0 | 0 |
| Dnmt1         | 3  | 0 | 0 | 0 |
| S1pr2         | 2  | 0 | 0 | 0 |
| Raver1        | 8  | 0 | 0 | 0 |
| Tyk2          | 9  | 0 | 0 | 0 |
| Cdc37         | 6  | 0 | 0 | 0 |
| Keap1         | 3  | 0 | 0 | 0 |
| Tmed1         | 1  | 0 | 0 | 0 |
| Yipf2         | 7  | 0 | 0 | 0 |
| Spc24         | 4  | 0 | 0 | 0 |
| Kank2         | 2  | 0 | 0 | 0 |
| Dock6         | 15 | 0 | 0 | 0 |
| Rab3d         | 1  | 0 | 0 | 0 |
| Ccdc151       | 5  | 0 | 0 | 0 |
| Ecsit         | 2  | 0 | 0 | 0 |
| Elof1         | 1  | 0 | 0 | 0 |
| Zfp810        | 5  | 0 | 0 | 0 |
| Anln          | 6  | 0 | 0 | 0 |
| rp9           | 3  | 0 | 0 | 0 |
| Dpy1911       | 3  | 0 | 0 | 0 |
| Herpud2       | 2  | 0 | 0 | 0 |
| Acad8         | 2  | 0 | 0 | 0 |
| Vps26b        | 1  | 0 | 0 | 0 |
| Jam3          | 1  | 0 | 0 | 0 |
| Adamts15      | 5  | 0 | 0 | 0 |
| St14          | 2  | 0 | 0 | 0 |
| Aplp2         | 7  | 0 | 0 | 0 |
| Tmem45b       | 4  | 0 | 0 | 0 |
| Fli1          | 1  | 0 | 0 | 0 |
| St3gal4       | 4  | 0 | 0 | 0 |
| Tirap         | 6  | 0 | 0 | 0 |
| Foxred1       | 8  | 0 | 0 | 0 |
| Ddx25         | 1  | 0 | 0 | 0 |
| Chek1         | 5  | 0 | 0 | 0 |
| Stt3a         | 1  | 0 | 0 | 0 |
| Ei24          | 3  | 0 | 0 | 0 |
| Pknox2        | 9  | 0 | 0 | 0 |
| Slc37a2       | 3  | 0 | 0 | 0 |
| Ccdc15        | 7  | 0 | 0 | 0 |
| Tbrg1         | 1  | 0 | 0 | 0 |
| Gramd1b       | 15 | 0 | 0 | 0 |
| XLOC_034759   | 3  | 0 | 0 | 0 |
| 4931429I11Rik | 6  | 0 | 0 | 0 |
| Ubash3b       | 9  | 0 | 0 | 0 |
| Sorl1         | 7  | 0 | 0 | 0 |
| Sc5d          | 2  | 0 | 0 | 0 |
| Tbcel         | 6  | 0 | 0 | 0 |

|               |    |   |   |   |
|---------------|----|---|---|---|
| Grik4         | 6  | 0 | 0 | 0 |
| Arhgef12      | 8  | 0 | 0 | 0 |
| Tmem136       | 5  | 0 | 0 | 0 |
| Pou2f3        | 1  | 0 | 0 | 0 |
| Oaf           | 3  | 0 | 0 | 0 |
| XLOC_034776   | 8  | 0 | 0 | 0 |
| Cbl           | 2  | 0 | 0 | 0 |
| Nlr1          | 5  | 0 | 0 | 0 |
| Abcg4         | 3  | 0 | 0 | 0 |
| Hinf1         | 10 | 0 | 0 | 0 |
| Vps11         | 5  | 0 | 0 | 0 |
| Trappc4       | 2  | 0 | 0 | 0 |
| Phldb1        | 18 | 0 | 0 | 0 |
| Arcn1         | 4  | 0 | 0 | 0 |
| Tmem25        | 6  | 0 | 0 | 0 |
| Mll1          | 9  | 0 | 0 | 0 |
| Ube4a         | 5  | 0 | 0 | 0 |
| Gm10684       | 7  | 0 | 0 | 0 |
| Il10ra        | 3  | 0 | 0 | 0 |
| Pafah1b2      | 3  | 0 | 0 | 0 |
| XLOC_034805   | 8  | 0 | 0 | 0 |
| Fam55b        | 8  | 0 | 0 | 0 |
| Rexo2         | 2  | 0 | 0 | 0 |
| Rbm7          | 3  | 0 | 0 | 0 |
| Zbtb16        | 4  | 0 | 0 | 0 |
| Htr3a         | 3  | 0 | 0 | 0 |
| Ttc12         | 3  | 0 | 0 | 0 |
| Ncam1         | 9  | 0 | 0 | 0 |
| Pts           | 5  | 0 | 0 | 0 |
| Sdhd          | 2  | 0 | 0 | 0 |
| AU019823      | 4  | 0 | 0 | 0 |
| Dlat          | 3  | 0 | 0 | 0 |
| 1110032A03Rik | 3  | 0 | 0 | 0 |
| SIK2          | 2  | 0 | 0 | 0 |
| Layn          | 3  | 0 | 0 | 0 |
| Fdx1          | 2  | 0 | 0 | 0 |
| A1593442      | 3  | 0 | 0 | 0 |
| XLOC_034836   | 2  | 0 | 0 | 0 |
| Atm           | 4  | 0 | 0 | 0 |
| Elmod1        | 3  | 0 | 0 | 0 |
| Tnfaip8l3     | 1  | 0 | 0 | 0 |
| Dmxl2         | 7  | 0 | 0 | 0 |
| Cib2          | 1  | 0 | 0 | 0 |
| Acsbg1        | 4  | 0 | 0 | 0 |
| Wdr61         | 6  | 0 | 0 | 0 |
| Chrna3        | 2  | 0 | 0 | 0 |
| Chrn4         | 3  | 0 | 0 | 0 |



|               |    |   |   |   |
|---------------|----|---|---|---|
| Etfa          | 3  | 0 | 0 | 0 |
| Scaper        | 2  | 0 | 0 | 0 |
| Tspan3        | 1  | 0 | 0 | 0 |
| C230081A13Rik | 5  | 0 | 0 | 0 |
| Lingo1        | 5  | 0 | 0 | 0 |
| Snx33         | 2  | 0 | 0 | 0 |
| Neil1         | 12 | 0 | 0 | 0 |
| Commd4        | 1  | 0 | 0 | 0 |
| 1700017B05Rik | 4  | 0 | 0 | 0 |
| Scamp5        | 8  | 0 | 0 | 0 |
| Csk           | 5  | 0 | 0 | 0 |
| Pml           | 5  | 0 | 0 | 0 |
| Loxl1         | 1  | 0 | 0 | 0 |
| 2410076I21Rik | 5  | 0 | 0 | 0 |
| Neo1          | 6  | 0 | 0 | 0 |
| Bbs4          | 6  | 0 | 0 | 0 |
| Arih1         | 5  | 0 | 0 | 0 |
| Senp8         | 3  | 0 | 0 | 0 |
| Rplp1         | 3  | 0 | 0 | 0 |
| Kif23         | 6  | 0 | 0 | 0 |
| Paqr5         | 5  | 0 | 0 | 0 |
| Glce          | 2  | 0 | 0 | 0 |
| XLOC_034893   | 1  | 0 | 0 | 0 |
| Coro2b        | 5  | 0 | 0 | 0 |
| Fem1b         | 1  | 0 | 0 | 0 |
| Pias1         | 4  | 0 | 0 | 0 |
| Skor1         | 1  | 0 | 0 | 0 |
| 2300009A05Rik | 2  | 0 | 0 | 0 |
| Gm6257        | 1  | 0 | 0 | 0 |
| Smad6         | 3  | 0 | 0 | 0 |
| Map2k1        | 6  | 0 | 0 | 0 |
| Dis3l         | 5  | 0 | 0 | 0 |
| Ptplad1       | 3  | 0 | 0 | 0 |
| Plekho2       | 2  | 0 | 0 | 0 |
| Zfp609        | 4  | 0 | 0 | 0 |
| Snx22         | 4  | 0 | 0 | 0 |
| Snx1          | 3  | 0 | 0 | 0 |
| Fbxl22        | 1  | 0 | 0 | 0 |
| Usp3          | 6  | 0 | 0 | 0 |
| Aph1c         | 3  | 0 | 0 | 0 |
| Lactb         | 3  | 0 | 0 | 0 |
| Tpm1          | 2  | 0 | 0 | 0 |
| Tln2          | 13 | 0 | 0 | 0 |
| Fam81a        | 2  | 0 | 0 | 0 |
| Ccnb2         | 4  | 0 | 0 | 0 |
| Rnf111        | 6  | 0 | 0 | 0 |
| Fam63b        | 3  | 0 | 0 | 0 |

|               |    |   |   |   |
|---------------|----|---|---|---|
| Grin1a        | 2  | 0 | 0 | 0 |
| Gcom1         | 5  | 0 | 0 | 0 |
| Cgn1          | 8  | 0 | 0 | 0 |
| Tcf12         | 11 | 0 | 0 | 0 |
| Pigb          | 3  | 0 | 0 | 0 |
| Unc13c        | 6  | 0 | 0 | 0 |
| Mapk6         | 5  | 0 | 0 | 0 |
| Tmod2         | 3  | 0 | 0 | 0 |
| Scg3          | 10 | 0 | 0 | 0 |
| Hcrtr2        | 3  | 0 | 0 | 0 |
| Lrrc1         | 7  | 0 | 0 | 0 |
| 7SK           | 1  | 0 | 0 | 0 |
| Ooep          | 5  | 0 | 0 | 0 |
| Eef1a1        | 5  | 0 | 0 | 0 |
| Slc17a5       | 2  | 0 | 0 | 0 |
| Cox7a2        | 3  | 0 | 0 | 0 |
| Tmem30a       | 2  | 0 | 0 | 0 |
| Phip          | 8  | 0 | 0 | 0 |
| Hmgn3         | 8  | 0 | 0 | 0 |
| Elovl4        | 1  | 0 | 0 | 0 |
| Fam46a        | 3  | 0 | 0 | 0 |
| Ibtk          | 6  | 0 | 0 | 0 |
| Ube2cbp       | 7  | 0 | 0 | 0 |
| Pgm3          | 2  | 0 | 0 | 0 |
| Snap91        | 11 | 0 | 0 | 0 |
| Snx14         | 1  | 0 | 0 | 0 |
| Syncrip       | 8  | 0 | 0 | 0 |
| 100039707     | 1  | 0 | 0 | 0 |
| Gm2382        | 6  | 0 | 0 | 0 |
| AF529169      | 7  | 0 | 0 | 0 |
| Tmed3         | 3  | 0 | 0 | 0 |
| Morf4l1       | 9  | 0 | 0 | 0 |
| Tbc1d2b       | 2  | 0 | 0 | 0 |
| Zic1          | 2  | 0 | 0 | 0 |
| 1190002N15Rik | 2  | 0 | 0 | 0 |
| 2610101N10Rik | 3  | 0 | 0 | 0 |
| Trpc1         | 6  | 0 | 0 | 0 |
| Pls1          | 5  | 0 | 0 | 0 |
| Atp1b3        | 9  | 0 | 0 | 0 |
| Rnf7          | 5  | 0 | 0 | 0 |
| XLOC_034997   | 9  | 0 | 0 | 0 |
| Rasa2         | 3  | 0 | 0 | 0 |
| Zbtb38        | 7  | 0 | 0 | 0 |
| Acpl2         | 3  | 0 | 0 | 0 |
| Spsb4         | 3  | 0 | 0 | 0 |
| Slc25a36      | 6  | 0 | 0 | 0 |
| Clstn2        | 4  | 0 | 0 | 0 |

|               |   |   |   |   |
|---------------|---|---|---|---|
| Mrps22        | 1 | 0 | 0 | 0 |
| Pik3cb        | 5 | 0 | 0 | 0 |
| Ii20rb        | 1 | 0 | 0 | 0 |
| Nck1          | 5 | 0 | 0 | 0 |
| Tmem22        | 3 | 0 | 0 | 0 |
| Pccb          | 1 | 0 | 0 | 0 |
| Ppp2r3a       | 2 | 0 | 0 | 0 |
| Ephb1         | 2 | 0 | 0 | 0 |
| Cep63         | 6 | 0 | 0 | 0 |
| Srprb         | 1 | 0 | 0 | 0 |
| Trf           | 2 | 0 | 0 | 0 |
| Cdv3          | 6 | 0 | 0 | 0 |
| Bfsp2         | 1 | 0 | 0 | 0 |
| Tmem108       | 4 | 0 | 0 | 0 |
| Uba5          | 5 | 0 | 0 | 0 |
| Acpp          | 5 | 0 | 0 | 0 |
| Nudt16        | 2 | 0 | 0 | 0 |
| Nek11         | 3 | 0 | 0 | 0 |
| Atp2c1        | 3 | 0 | 0 | 0 |
| Alas1         | 1 | 0 | 0 | 0 |
| Acy1          | 5 | 0 | 0 | 0 |
| Parp3         | 7 | 0 | 0 | 0 |
| Tex264        | 7 | 0 | 0 | 0 |
| Rad54l2       | 6 | 0 | 0 | 0 |
| Manf          | 1 | 0 | 0 | 0 |
| Mapkapk3      | 8 | 0 | 0 | 0 |
| Cyb561d2      | 3 | 0 | 0 | 0 |
| Sema3b        | 6 | 0 | 0 | 0 |
| Gnai2         | 3 | 0 | 0 | 0 |
| Sema3f        | 9 | 0 | 0 | 0 |
| Rbm5          | 3 | 0 | 0 | 0 |
| Rbm6          | 8 | 0 | 0 | 0 |
| 6230427J02Rik | 2 | 0 | 0 | 0 |
| Rnf123        | 5 | 0 | 0 | 0 |
| Apeh          | 4 | 0 | 0 | 0 |
| Bsn           | 2 | 0 | 0 | 0 |
| Dag1          | 7 | 0 | 0 | 0 |
| Tcta          | 2 | 0 | 0 | 0 |
| Klhdc8b       | 5 | 0 | 0 | 0 |
| P4htm         | 5 | 0 | 0 | 0 |
| Arih2         | 6 | 0 | 0 | 0 |
| Ccdc72        | 6 | 0 | 0 | 0 |
| Camp          | 1 | 0 | 0 | 0 |
| Ptpn23        | 6 | 0 | 0 | 0 |
| Klhl18        | 6 | 0 | 0 | 0 |
| Nbeal2        | 8 | 0 | 0 | 0 |
| Pth1r         | 3 | 0 | 0 | 0 |

|               |    |   |   |   |
|---------------|----|---|---|---|
| Ccr12         | 3  | 0 | 0 | 0 |
| Stac          | 4  | 0 | 0 | 0 |
| Pdcd6ip       | 1  | 0 | 0 | 0 |
| Fbxl2         | 6  | 0 | 0 | 0 |
| Crtap         | 2  | 0 | 0 | 0 |
| Cnot10        | 6  | 0 | 0 | 0 |
| Cmtm7         | 2  | 0 | 0 | 0 |
| Cmtm8         | 1  | 0 | 0 | 0 |
| Gpd1l         | 3  | 0 | 0 | 0 |
| Tgfbr2        | 4  | 0 | 0 | 0 |
| Rbms3         | 8  | 0 | 0 | 0 |
| Cmc1          | 1  | 0 | 0 | 0 |
| Plcd1         | 6  | 0 | 0 | 0 |
| 9330176C04Rik | 5  | 0 | 0 | 0 |
| Oxsr1         | 4  | 0 | 0 | 0 |
| Myd88         | 1  | 0 | 0 | 0 |
| Scn11a        | 5  | 0 | 0 | 0 |
| Gorasp1       | 2  | 0 | 0 | 0 |
| Csrnp1        | 4  | 0 | 0 | 0 |
| AK085969      | 1  | 0 | 0 | 0 |
| Ulk4          | 13 | 0 | 0 | 0 |
| Cck           | 3  | 0 | 0 | 0 |
| Sec22c        | 6  | 0 | 0 | 0 |
| Hhat1         | 6  | 0 | 0 | 0 |
| Ccdc13        | 1  | 0 | 0 | 0 |
| Gm9790        | 3  | 0 | 0 | 0 |
| C85492        | 3  | 0 | 0 | 0 |
| Ano10         | 4  | 0 | 0 | 0 |
| XLOC_035130   | 3  | 0 | 0 | 0 |
| Zfp445        | 5  | 0 | 0 | 0 |
| 1110059G10Rik | 1  | 0 | 0 | 0 |
| Zdhhc3        | 2  | 0 | 0 | 0 |
| Lztfl1        | 7  | 0 | 0 | 0 |
| XLOC_034142   | 1  | 0 | 0 | 0 |
| Taf1d         | 1  | 0 | 0 | 0 |
| XLOC_034167   | 3  | 0 | 0 | 0 |
| XLOC_034199   | 1  | 0 | 0 | 0 |
| XLOC_034212   | 6  | 0 | 0 | 0 |
| Vsig2         | 1  | 0 | 0 | 0 |
| XLOC_034226   | 1  | 0 | 0 | 0 |
| Bsx           | 1  | 0 | 0 | 0 |
| Scn2b         | 2  | 0 | 0 | 0 |
| Bace1         | 1  | 0 | 0 | 0 |
| Timm8b        | 1  | 0 | 0 | 0 |
| Pih1d2        | 1  | 0 | 0 | 0 |
| Fdxacb1       | 2  | 0 | 0 | 0 |
| Npat          | 3  | 0 | 0 | 0 |

|               |    |   |   |   |
|---------------|----|---|---|---|
| XLOC_034318   | 1  | 0 | 0 | 0 |
| Stra6         | 7  | 0 | 0 | 0 |
| XLOC_034353   | 1  | 0 | 0 | 0 |
| Spg21         | 1  | 0 | 0 | 0 |
| Fam96a        | 1  | 0 | 0 | 0 |
| Znf280d       | 4  | 0 | 0 | 0 |
| XLOC_034440   | 4  | 0 | 0 | 0 |
| XLOC_034444   | 1  | 0 | 0 | 0 |
| XLOC_034451   | 1  | 0 | 0 | 0 |
| XLOC_034490   | 1  | 0 | 0 | 0 |
| Aste1         | 6  | 0 | 0 | 0 |
| Zmynd10       | 1  | 0 | 0 | 0 |
| Hyal1         | 2  | 0 | 0 | 0 |
| Camkv         | 3  | 0 | 0 | 0 |
| Ucn2          | 1  | 0 | 0 | 0 |
| Smarcc1       | 1  | 0 | 0 | 0 |
| Susd5         | 1  | 0 | 0 | 0 |
| Dlec1         | 11 | 0 | 0 | 0 |
| XLOC_034614   | 3  | 0 | 0 | 0 |
| XLOC_034644   | 1  | 0 | 0 | 0 |
| Tmem42        | 3  | 0 | 0 | 0 |
| Exosc7        | 2  | 0 | 0 | 0 |
| XLOC_034654   | 4  | 0 | 0 | 0 |
| Kdm4d         | 3  | 0 | 0 | 0 |
| Naalad2       | 5  | 0 | 0 | 0 |
| Zfp266        | 6  | 0 | 0 | 0 |
| Fbxl12        | 3  | 0 | 0 | 0 |
| Kri1          | 3  | 0 | 0 | 0 |
| Dcps          | 2  | 0 | 0 | 0 |
| Fam118b       | 2  | 0 | 0 | 0 |
| Hyls1         | 1  | 0 | 0 | 0 |
| Nrgn          | 3  | 0 | 0 | 0 |
| AK089373      | 2  | 0 | 0 | 0 |
| Atp5l         | 1  | 0 | 0 | 0 |
| Rnf214        | 5  | 0 | 0 | 0 |
| Sidt2         | 9  | 0 | 0 | 0 |
| XLOC_034807   | 3  | 0 | 0 | 0 |
| XLOC_034809   | 1  | 0 | 0 | 0 |
| Nnmt          | 2  | 0 | 0 | 0 |
| Dixdc1        | 4  | 0 | 0 | 0 |
| 2310030G06Rik | 2  | 0 | 0 | 0 |
| XLOC_034835   | 1  | 0 | 0 | 0 |
| XLOC_034841   | 1  | 0 | 0 | 0 |
| XLOC_034847   | 2  | 0 | 0 | 0 |
| XLOC_034849   | 1  | 0 | 0 | 0 |
| Cd276         | 5  | 0 | 0 | 0 |
| AK038653      | 6  | 0 | 0 | 0 |

|               |   |   |   |   |
|---------------|---|---|---|---|
| XLOC_034892   | 2 | 0 | 0 | 0 |
| XLOC_034916   | 1 | 0 | 0 | 0 |
| tsec-1        | 1 | 0 | 0 | 0 |
| Gsta2         | 1 | 0 | 0 | 0 |
| 2810026P18Rik | 2 | 0 | 0 | 0 |
| AK131742      | 1 | 0 | 0 | 0 |
| Dnajc13       | 6 | 0 | 0 | 0 |
| Abhd14a       | 1 | 0 | 0 | 0 |
| Hemk1         | 6 | 0 | 0 | 0 |
| BY080835      | 1 | 0 | 0 | 0 |
| XLOC_035067   | 1 | 0 | 0 | 0 |
| Dhx30         | 4 | 0 | 0 | 0 |
| Nradd         | 1 | 0 | 0 | 0 |
| XLOC_035113   | 1 | 0 | 0 | 0 |
| Higd1a        | 1 | 0 | 0 | 0 |
| GODZ          | 1 | 0 | 0 | 0 |
| Mmp8          | 1 | 0 | 0 | 0 |
| XLOC_034134   | 1 | 0 | 0 | 0 |
| Ncapd3        | 2 | 0 | 0 | 0 |
| Gm16322       | 1 | 0 | 0 | 0 |
| XLOC_034255   | 1 | 0 | 0 | 0 |
| XLOC_034289   | 2 | 0 | 0 | 0 |
| Edc3          | 2 | 0 | 0 | 0 |
| XLOC_034335   | 1 | 0 | 0 | 0 |
| AK039256      | 4 | 0 | 0 | 0 |
| Aldh1a2       | 1 | 0 | 0 | 0 |
| XLOC_034443   | 2 | 0 | 0 | 0 |
| Ttk           | 2 | 0 | 0 | 0 |
| XLOC_034463   | 2 | 0 | 0 | 0 |
| Bcl2a1a       | 1 | 0 | 0 | 0 |
| XLOC_034483   | 1 | 0 | 0 | 0 |
| XLOC_034491   | 1 | 0 | 0 | 0 |
| Nmnat3        | 2 | 0 | 0 | 0 |
| Plxnb1        | 6 | 0 | 0 | 0 |
| Myl3          | 1 | 0 | 0 | 0 |
| Prss45        | 1 | 0 | 0 | 0 |
| Ltf           | 2 | 0 | 0 | 0 |
| AK015855      | 1 | 0 | 0 | 0 |
| AK039053      | 1 | 0 | 0 | 0 |
| Fam198a       | 1 | 0 | 0 | 0 |
| XLOC_034640   | 3 | 0 | 0 | 0 |
| XLOC_034649   | 3 | 0 | 0 | 0 |
| Birc3         | 4 | 0 | 0 | 0 |
| Epor          | 3 | 0 | 0 | 0 |
| Acp5          | 3 | 0 | 0 | 0 |
| A130066N16Rik | 3 | 0 | 0 | 0 |
| Gm10687       | 1 | 0 | 0 | 0 |

|               |   |   |   |   |
|---------------|---|---|---|---|
| Acat1         | 2 | 0 | 0 | 0 |
| XLOC_034869   | 1 | 0 | 0 | 0 |
| Thsd4         | 1 | 0 | 0 | 0 |
| Aph1b         | 1 | 0 | 0 | 0 |
| Rab8b         | 2 | 0 | 0 | 0 |
| XLOC_034925   | 1 | 0 | 0 | 0 |
| Gm5918        | 1 | 0 | 0 | 0 |
| Col12a1       | 5 | 0 | 0 | 0 |
| Gm5621        | 1 | 0 | 0 | 0 |
| Scn5a         | 1 | 0 | 0 | 0 |
| XLOC_035127   | 2 | 0 | 0 | 0 |
| Gm10606       | 1 | 0 | 0 | 0 |
| Slc6a20a      | 4 | 0 | 0 | 0 |
| XLOC_034122   | 3 | 0 | 0 | 0 |
| 5730577I03Rik | 3 | 0 | 0 | 0 |
| Icam4         | 1 | 0 | 0 | 0 |
| Pus3          | 1 | 0 | 0 | 0 |
| XLOC_034213   | 1 | 0 | 0 | 0 |
| XLOC_034221   | 2 | 0 | 0 | 0 |
| XLOC_034258   | 1 | 0 | 0 | 0 |
| Mpzl2         | 2 | 0 | 0 | 0 |
| XLOC_034277   | 2 | 0 | 0 | 0 |
| AK146160      | 1 | 0 | 0 | 0 |
| XLOC_034449   | 1 | 0 | 0 | 0 |
| AK046134      | 1 | 0 | 0 | 0 |
| XLOC_034471   | 1 | 0 | 0 | 0 |
| Zic4          | 1 | 0 | 0 | 0 |
| Plscr1        | 2 | 0 | 0 | 0 |
| XLOC_034485   | 1 | 0 | 0 | 0 |
| XLOC_034508   | 1 | 0 | 0 | 0 |
| Tlr9          | 1 | 0 | 0 | 0 |
| XLOC_034551   | 1 | 0 | 0 | 0 |
| Zglp1         | 3 | 0 | 0 | 0 |
| Ap1m2         | 2 | 0 | 0 | 0 |
| Cd3g          | 1 | 0 | 0 | 0 |
| Ppcdc         | 4 | 0 | 0 | 0 |
| Lman1l        | 1 | 0 | 0 | 0 |
| Ccdc33        | 1 | 0 | 0 | 0 |
| Lipc          | 1 | 0 | 0 | 0 |
| XLOC_034963   | 1 | 0 | 0 | 0 |
| 1300017J02Rik | 1 | 0 | 0 | 0 |
| XLOC_035082   | 1 | 0 | 0 | 0 |
| XLOC_035100   | 5 | 0 | 0 | 0 |
| XLOC_034275   | 1 | 0 | 0 | 0 |
| XLOC_034321   | 1 | 0 | 0 | 0 |
| XLOC_034418   | 1 | 0 | 0 | 0 |
| XLOC_034482   | 1 | 0 | 0 | 0 |

|               |    |   |   |   |
|---------------|----|---|---|---|
| Rbp2          | 1  | 0 | 0 | 0 |
| Ube1l         | 1  | 0 | 0 | 0 |
| Gad1          | 2  | 0 | 0 | 0 |
| Tmem205       | 1  | 0 | 0 | 0 |
| XLOC_034777   | 1  | 0 | 0 | 0 |
| AK077358      | 1  | 0 | 0 | 0 |
| XLOC_034193   | 1  | 0 | 0 | 0 |
| XLOC_034215   | 1  | 0 | 0 | 0 |
| Hspa8         | 2  | 0 | 0 | 0 |
| Trim29        | 1  | 0 | 0 | 0 |
| XLOC_034274   | 1  | 0 | 0 | 0 |
| 2410004A20Rik | 1  | 0 | 0 | 0 |
| XLOC_034413   | 1  | 0 | 0 | 0 |
| XLOC_034437   | 1  | 0 | 0 | 0 |
| AK162636      | 1  | 0 | 0 | 0 |
| Trim43a       | 1  | 0 | 0 | 0 |
| XLOC_034474   | 1  | 0 | 0 | 0 |
| Dalrd3        | 1  | 0 | 0 | 0 |
| Tmem103       | 1  | 0 | 0 | 0 |
| Tgm4          | 1  | 0 | 0 | 0 |
| XLOC_034774   | 1  | 0 | 0 | 0 |
| Hspb2         | 2  | 0 | 0 | 0 |
| XLOC_034888   | 1  | 0 | 0 | 0 |
| XLOC_034902   | 1  | 0 | 0 | 0 |
| XLOC_034962   | 1  | 0 | 0 | 0 |
| Slc38a3       | 1  | 0 | 0 | 0 |
| AK077029      | 1  | 0 | 0 | 0 |
| Nudt11        | 1  | 0 | 0 | 0 |
| Dgkk          | 1  | 0 | 0 | 0 |
| LOC100270707  | 2  | 0 | 0 | 0 |
| Prickle3      | 3  | 0 | 0 | 0 |
| Praf2         | 6  | 0 | 0 | 0 |
| Tcfe3         | 4  | 0 | 0 | 0 |
| Gripap1       | 4  | 0 | 0 | 0 |
| Kcnd1         | 6  | 0 | 0 | 0 |
| Otud5         | 5  | 0 | 0 | 0 |
| Pcsk1n        | 3  | 0 | 0 | 0 |
| B630019K06Rik | 1  | 0 | 0 | 0 |
| Xk            | 3  | 0 | 0 | 0 |
| Mid1ip1       | 3  | 0 | 0 | 0 |
| Atp6ap2       | 1  | 0 | 0 | 0 |
| Gm16265       | 1  | 0 | 0 | 0 |
| AK036020      | 11 | 0 | 0 | 0 |
| Usp9x         | 12 | 0 | 0 | 0 |
| Rpl3-ps1      | 1  | 0 | 0 | 0 |
| Ddx3x         | 8  | 0 | 0 | 0 |
| Maoa          | 1  | 0 | 0 | 0 |



|               |    |   |   |   |
|---------------|----|---|---|---|
| Chst7         | 1  | 0 | 0 | 0 |
| Rp2h          | 2  | 0 | 0 | 0 |
| Uba1          | 8  | 0 | 0 | 0 |
| Cdk16         | 9  | 0 | 0 | 0 |
| Wdr44         | 2  | 0 | 0 | 0 |
| Dock11        | 9  | 0 | 0 | 0 |
| Il13ra1       | 1  | 0 | 0 | 0 |
| Zcchc12       | 5  | 0 | 0 | 0 |
| Pgrmc1        | 2  | 0 | 0 | 0 |
| Slc25a43      | 5  | 0 | 0 | 0 |
| Slc25a5       | 4  | 0 | 0 | 0 |
| Nkap          | 2  | 0 | 0 | 0 |
| Zbtb33        | 2  | 0 | 0 | 0 |
| Gm7598        | 1  | 0 | 0 | 0 |
| Mcts1         | 4  | 0 | 0 | 0 |
| Gria3         | 12 | 0 | 0 | 0 |
| Xiap          | 6  | 0 | 0 | 0 |
| Stag2         | 7  | 0 | 0 | 0 |
| 1110059M19Rik | 1  | 0 | 0 | 0 |
| Xpnpep2       | 4  | 0 | 0 | 0 |
| Sash3         | 4  | 0 | 0 | 0 |
| Utp14a        | 1  | 0 | 0 | 0 |
| XLOC_036248   | 2  | 0 | 0 | 0 |
| Rab33a        | 2  | 0 | 0 | 0 |
| Slc25a14      | 11 | 0 | 0 | 0 |
| Rbm2          | 1  | 0 | 0 | 0 |
| Arhgap36      | 5  | 0 | 0 | 0 |
| 2610018G03Rik | 2  | 0 | 0 | 0 |
| Ccdc160       | 2  | 0 | 0 | 0 |
| Phf6          | 3  | 0 | 0 | 0 |
| Gm14584       | 1  | 0 | 0 | 0 |
| Cxx1c         | 3  | 0 | 0 | 0 |
| 4930502E18Rik | 4  | 0 | 0 | 0 |
| Zfp449        | 3  | 0 | 0 | 0 |
| Ncrna00086    | 1  | 0 | 0 | 0 |
| Ddx26b        | 10 | 0 | 0 | 0 |
| Slc9a6        | 4  | 0 | 0 | 0 |
| Fhl1          | 7  | 0 | 0 | 0 |
| Htatsf1       | 2  | 0 | 0 | 0 |
| Gm14662       | 1  | 0 | 0 | 0 |
| C230004F18Rik | 9  | 0 | 0 | 0 |
| Slitrk2       | 6  | 0 | 0 | 0 |
| Fmr1          | 8  | 0 | 0 | 0 |
| 1110012L19Rik | 1  | 0 | 0 | 0 |
| Mamld1        | 4  | 0 | 0 | 0 |
| Mtm1          | 4  | 0 | 0 | 0 |
| Mtmr1         | 9  | 0 | 0 | 0 |

|               |    |   |   |   |
|---------------|----|---|---|---|
| Vma21         | 4  | 0 | 0 | 0 |
| Prrg3         | 4  | 0 | 0 | 0 |
| Nsdhl         | 3  | 0 | 0 | 0 |
| Xlr4b         | 1  | 0 | 0 | 0 |
| Zfp275        | 4  | 0 | 0 | 0 |
| Bgn           | 1  | 0 | 0 | 0 |
| Slc6a8        | 1  | 0 | 0 | 0 |
| Abcd1         | 5  | 0 | 0 | 0 |
| Opn1mw        | 1  | 0 | 0 | 0 |
| Emd           | 3  | 0 | 0 | 0 |
| Atp6ap1       | 5  | 0 | 0 | 0 |
| Gdi1          | 6  | 0 | 0 | 0 |
| Fam50a        | 2  | 0 | 0 | 0 |
| Plxna3        | 10 | 0 | 0 | 0 |
| Ikbkg         | 5  | 0 | 0 | 0 |
| Xlr3d-ps      | 2  | 0 | 0 | 0 |
| Xlr3e-ps      | 2  | 0 | 0 | 0 |
| Dkc1          | 3  | 0 | 0 | 0 |
| Gm6039        | 1  | 0 | 0 | 0 |
| Fundc2        | 2  | 0 | 0 | 0 |
| Vbp1          | 1  | 0 | 0 | 0 |
| Rps24-ps3     | 1  | 0 | 0 | 0 |
| Tmem47        | 1  | 0 | 0 | 0 |
| Dmd           | 9  | 0 | 0 | 0 |
| Tab3          | 8  | 0 | 0 | 0 |
| 5430427019Rik | 2  | 0 | 0 | 0 |
| Pcyt1b        | 3  | 0 | 0 | 0 |
| Zxdb          | 1  | 0 | 0 | 0 |
| Msn           | 2  | 0 | 0 | 0 |
| Gpr165        | 1  | 0 | 0 | 0 |
| Ar            | 1  | 0 | 0 | 0 |
| Yipf6         | 2  | 0 | 0 | 0 |
| Stard8        | 6  | 0 | 0 | 0 |
| Efnb1         | 1  | 0 | 0 | 0 |
| XLOC_036367   | 2  | 0 | 0 | 0 |
| Gm14808       | 1  | 0 | 0 | 0 |
| Tmem28        | 1  | 0 | 0 | 0 |
| Igbp1         | 1  | 0 | 0 | 0 |
| Dlg3          | 10 | 0 | 0 | 0 |
| Foxo4         | 3  | 0 | 0 | 0 |
| Med12         | 11 | 0 | 0 | 0 |
| Nlgn3         | 4  | 0 | 0 | 0 |
| Gjb1          | 1  | 0 | 0 | 0 |
| Taf1          | 5  | 0 | 0 | 0 |
| Pin4          | 4  | 0 | 0 | 0 |
| Chic1         | 2  | 0 | 0 | 0 |
| 2610029G23Rik | 5  | 0 | 0 | 0 |

|               |    |   |   |   |
|---------------|----|---|---|---|
| Magee1        | 1  | 0 | 0 | 0 |
| Cox7b         | 4  | 0 | 0 | 0 |
| Atp7a         | 3  | 0 | 0 | 0 |
| Pgk1          | 3  | 0 | 0 | 0 |
| Lpar4         | 1  | 0 | 0 | 0 |
| 2810403D21Rik | 6  | 0 | 0 | 0 |
| Sh3bgrl       | 5  | 0 | 0 | 0 |
| Apool         | 1  | 0 | 0 | 0 |
| Zfp711        | 6  | 0 | 0 | 0 |
| Klhl4         | 2  | 0 | 0 | 0 |
| Gm14897       | 1  | 0 | 0 | 0 |
| Gm16373       | 1  | 0 | 0 | 0 |
| Gm16421       | 1  | 0 | 0 | 0 |
| Gm14942       | 1  | 0 | 0 | 0 |
| Diap2         | 7  | 0 | 0 | 0 |
| Srpx2         | 2  | 0 | 0 | 0 |
| Cstf2         | 6  | 0 | 0 | 0 |
| Tmem35        | 5  | 0 | 0 | 0 |
| Drp2          | 9  | 0 | 0 | 0 |
| Rpl36a        | 2  | 0 | 0 | 0 |
| Hnrnph2       | 1  | 0 | 0 | 0 |
| Armcx1        | 7  | 0 | 0 | 0 |
| Wbp5          | 2  | 0 | 0 | 0 |
| Tceal3        | 1  | 0 | 0 | 0 |
| Tceal1        | 1  | 0 | 0 | 0 |
| Plp1          | 4  | 0 | 0 | 0 |
| Zcchc18       | 5  | 0 | 0 | 0 |
| Fam199x       | 3  | 0 | 0 | 0 |
| XLOC_036446   | 1  | 0 | 0 | 0 |
| Rnf128        | 1  | 0 | 0 | 0 |
| Frmpd3        | 6  | 0 | 0 | 0 |
| Mid2          | 6  | 0 | 0 | 0 |
| Atg4a         | 2  | 0 | 0 | 0 |
| Nxt2          | 5  | 0 | 0 | 0 |
| Tmem164       | 11 | 0 | 0 | 0 |
| Pak3          | 8  | 0 | 0 | 0 |
| Alg13         | 5  | 0 | 0 | 0 |
| Alas2         | 7  | 0 | 0 | 0 |
| Pfkfb1        | 6  | 0 | 0 | 0 |
| Fgd1          | 2  | 0 | 0 | 0 |
| Wnk3-ps       | 1  | 0 | 0 | 0 |
| XLOC_036473   | 1  | 0 | 0 | 0 |
| Fam120c       | 2  | 0 | 0 | 0 |
| Huwe1         | 9  | 0 | 0 | 0 |
| Hsd17b10      | 1  | 0 | 0 | 0 |
| Smc1a         | 3  | 0 | 0 | 0 |
| Iqsec2        | 10 | 0 | 0 | 0 |

|               |    |   |   |   |
|---------------|----|---|---|---|
| Kdm5c         | 5  | 0 | 0 | 0 |
| Rragb         | 5  | 0 | 0 | 0 |
| Klf8          | 9  | 0 | 0 | 0 |
| Ubqln2        | 1  | 0 | 0 | 0 |
| 2210013O21Rik | 2  | 0 | 0 | 0 |
| Spin2         | 5  | 0 | 0 | 0 |
| Acot9         | 3  | 0 | 0 | 0 |
| Smpx          | 5  | 0 | 0 | 0 |
| Rps6ka3       | 8  | 0 | 0 | 0 |
| Eif1ax        | 1  | 0 | 0 | 0 |
| Mtap7d2       | 10 | 0 | 0 | 0 |
| A830080D01Rik | 5  | 0 | 0 | 0 |
| Sh3kbp1       | 13 | 0 | 0 | 0 |
| Gpr64         | 8  | 0 | 0 | 0 |
| Scml2         | 3  | 0 | 0 | 0 |
| Rai2          | 2  | 0 | 0 | 0 |
| Rbbp7         | 6  | 0 | 0 | 0 |
| Ace2          | 5  | 0 | 0 | 0 |
| Piga          | 3  | 0 | 0 | 0 |
| Fancb         | 7  | 0 | 0 | 0 |
| Gemin8        | 4  | 0 | 0 | 0 |
| Gpm6b         | 4  | 0 | 0 | 0 |
| Trappc2       | 3  | 0 | 0 | 0 |
| Arhgap6       | 2  | 0 | 0 | 0 |
| Nudt10        | 1  | 0 | 0 | 0 |
| Bmp15         | 1  | 0 | 0 | 0 |
| Clcn5         | 3  | 0 | 0 | 0 |
| Usp27x        | 1  | 0 | 0 | 0 |
| cip7          | 2  | 0 | 0 | 0 |
| Ppp1r3f       | 1  | 0 | 0 | 0 |
| Ccdc120       | 2  | 0 | 0 | 0 |
| Pqbp1         | 2  | 0 | 0 | 0 |
| Hdac6         | 6  | 0 | 0 | 0 |
| Suv39h1       | 2  | 0 | 0 | 0 |
| Wdr13         | 5  | 0 | 0 | 0 |
| Tbc1d25       | 3  | 0 | 0 | 0 |
| Ebp           | 2  | 0 | 0 | 0 |
| Porcn         | 2  | 0 | 0 | 0 |
| Ftsj1         | 4  | 0 | 0 | 0 |
| Cybb          | 3  | 0 | 0 | 0 |
| Dynlt3        | 1  | 0 | 0 | 0 |
| Rpgr          | 6  | 0 | 0 | 0 |
| Srpx          | 2  | 0 | 0 | 0 |
| Bcor          | 6  | 0 | 0 | 0 |
| mKIAA1575     | 7  | 0 | 0 | 0 |
| Gm14535       | 1  | 0 | 0 | 0 |
| Gm9434        | 1  | 0 | 0 | 0 |

|               |   |   |   |   |
|---------------|---|---|---|---|
| Cask          | 9 | 0 | 0 | 0 |
| Maob          | 2 | 0 | 0 | 0 |
| Ndp           | 3 | 0 | 0 | 0 |
| Fundc1        | 1 | 0 | 0 | 0 |
| Slc9a7        | 2 | 0 | 0 | 0 |
| Ndufb11       | 5 | 0 | 0 | 0 |
| Syn1          | 8 | 0 | 0 | 0 |
| Zfp182        | 7 | 0 | 0 | 0 |
| Zfp300        | 1 | 0 | 0 | 0 |
| Gm6938        | 2 | 0 | 0 | 0 |
| Klhl13        | 8 | 0 | 0 | 0 |
| Gm6023        | 1 | 0 | 0 | 0 |
| Akap17b       | 5 | 0 | 0 | 0 |
| Rpl39         | 5 | 0 | 0 | 0 |
| Nkrf          | 1 | 0 | 0 | 0 |
| Upf3b         | 3 | 0 | 0 | 0 |
| Ndufa1        | 1 | 0 | 0 | 0 |
| Fam70a        | 3 | 0 | 0 | 0 |
| Lamp2         | 2 | 0 | 0 | 0 |
| Cul4b         | 4 | 0 | 0 | 0 |
| C1galt1c1     | 1 | 0 | 0 | 0 |
| Thoc2         | 6 | 0 | 0 | 0 |
| Odz1          | 6 | 0 | 0 | 0 |
| ten-m1        | 1 | 0 | 0 | 0 |
| Dcaf12l1      | 2 | 0 | 0 | 0 |
| Smarca1       | 7 | 0 | 0 | 0 |
| Apln          | 4 | 0 | 0 | 0 |
| Zdhhc9        | 4 | 0 | 0 | 0 |
| Aifm1         | 4 | 0 | 0 | 0 |
| Gpr119        | 3 | 0 | 0 | 0 |
| Enox2         | 9 | 0 | 0 | 0 |
| AK039412      | 2 | 0 | 0 | 0 |
| 6720401G13Rik | 8 | 0 | 0 | 0 |
| Frmd7         | 5 | 0 | 0 | 0 |
| Rap2c         | 1 | 0 | 0 | 0 |
| Hs6st2        | 8 | 0 | 0 | 0 |
| Gpc4          | 1 | 0 | 0 | 0 |
| Gpc3          | 2 | 0 | 0 | 0 |
| Gm14586       | 1 | 0 | 0 | 0 |
| Fam122b       | 7 | 0 | 0 | 0 |
| Mospd1        | 4 | 0 | 0 | 0 |
| Gm1862        | 1 | 0 | 0 | 0 |
| Mmgt1         | 3 | 0 | 0 | 0 |
| Arhgef6       | 8 | 0 | 0 | 0 |
| RbmX          | 6 | 0 | 0 | 0 |
| Fgf13         | 9 | 0 | 0 | 0 |
| Gm5637        | 1 | 0 | 0 | 0 |

|          |    |   |   |   |
|----------|----|---|---|---|
| Mcf2     | 6  | 0 | 0 | 0 |
| Slitrk4  | 4  | 0 | 0 | 0 |
| Gm14681  | 1  | 0 | 0 | 0 |
| Ids      | 7  | 0 | 0 | 0 |
| BC023829 | 1  | 0 | 0 | 0 |
| Cd99l2   | 9  | 0 | 0 | 0 |
| Gabre    | 1  | 0 | 0 | 0 |
| Gabra3   | 4  | 0 | 0 | 0 |
| Cetn2    | 1  | 0 | 0 | 0 |
| Xlr4c    | 4  | 0 | 0 | 0 |
| Haus7    | 2  | 0 | 0 | 0 |
| Pnck     | 5  | 0 | 0 | 0 |
| Bcap31   | 2  | 0 | 0 | 0 |
| ldh3g    | 3  | 0 | 0 | 0 |
| L1cam    | 7  | 0 | 0 | 0 |
| Irak1    | 6  | 0 | 0 | 0 |
| Mecp2    | 4  | 0 | 0 | 0 |
| Lage3    | 3  | 0 | 0 | 0 |
| Ubl4     | 3  | 0 | 0 | 0 |
| Fam3a    | 1  | 0 | 0 | 0 |
| G6pdx    | 3  | 0 | 0 | 0 |
| Gab3     | 7  | 0 | 0 | 0 |
| Mpp1     | 2  | 0 | 0 | 0 |
| F8       | 4  | 0 | 0 | 0 |
| Rab39b   | 1  | 0 | 0 | 0 |
| Pls3     | 4  | 0 | 0 | 0 |
| Gm14706  | 1  | 0 | 0 | 0 |
| Gm8722   | 1  | 0 | 0 | 0 |
| Prkx     | 3  | 0 | 0 | 0 |
| Gm8822   | 1  | 0 | 0 | 0 |
| Gyk      | 3  | 0 | 0 | 0 |
| Pola1    | 4  | 0 | 0 | 0 |
| Pdk3     | 3  | 0 | 0 | 0 |
| Zfx      | 6  | 0 | 0 | 0 |
| Eif2s3x  | 1  | 0 | 0 | 0 |
| Maged1   | 2  | 0 | 0 | 0 |
| Zxda     | 1  | 0 | 0 | 0 |
| Arhgef9  | 11 | 0 | 0 | 0 |
| Fam123b  | 3  | 0 | 0 | 0 |
| Zc4h2    | 1  | 0 | 0 | 0 |
| Las1l    | 4  | 0 | 0 | 0 |
| Ophn1    | 4  | 0 | 0 | 0 |
| Pja1     | 2  | 0 | 0 | 0 |
| Pdzd11   | 2  | 0 | 0 | 0 |
| Slc7a3   | 4  | 0 | 0 | 0 |
| Snx12    | 2  | 0 | 0 | 0 |
| Il2rg    | 5  | 0 | 0 | 0 |

|               |    |   |   |   |
|---------------|----|---|---|---|
| Zmym3         | 12 | 0 | 0 | 0 |
| Rgag4         | 3  | 0 | 0 | 0 |
| Rps4x         | 5  | 0 | 0 | 0 |
| Hdac8         | 1  | 0 | 0 | 0 |
| Phka1         | 6  | 0 | 0 | 0 |
| Dmrtc1a       | 3  | 0 | 0 | 0 |
| XLOC_036762   | 3  | 0 | 0 | 0 |
| Gm6206        | 1  | 0 | 0 | 0 |
| Nap1l2        | 1  | 0 | 0 | 0 |
| B230206F22Rik | 10 | 0 | 0 | 0 |
| Slc16a2       | 3  | 0 | 0 | 0 |
| Rlim          | 3  | 0 | 0 | 0 |
| C77370        | 3  | 0 | 0 | 0 |
| Abcb7         | 2  | 0 | 0 | 0 |
| Zdhhc15       | 5  | 0 | 0 | 0 |
| Magee2        | 1  | 0 | 0 | 0 |
| 5530601H04Rik | 5  | 0 | 0 | 0 |
| 5330434G04Rik | 4  | 0 | 0 | 0 |
| Atrx          | 12 | 0 | 0 | 0 |
| Magt1         | 2  | 0 | 0 | 0 |
| Taf9b         | 3  | 0 | 0 | 0 |
| Itm2a         | 1  | 0 | 0 | 0 |
| 2610002M06Rik | 2  | 0 | 0 | 0 |
| Brwd3         | 5  | 0 | 0 | 0 |
| Hdx           | 3  | 0 | 0 | 0 |
| Chm           | 6  | 0 | 0 | 0 |
| Nap1l3        | 1  | 0 | 0 | 0 |
| Pcdh19        | 2  | 0 | 0 | 0 |
| Tspan6        | 2  | 0 | 0 | 0 |
| Trmt2b        | 4  | 0 | 0 | 0 |
| Gla           | 1  | 0 | 0 | 0 |
| Armcx6        | 3  | 0 | 0 | 0 |
| Armcx2        | 4  | 0 | 0 | 0 |
| Zmat1         | 5  | 0 | 0 | 0 |
| Bex2          | 3  | 0 | 0 | 0 |
| Tceal8        | 1  | 0 | 0 | 0 |
| Morf4l2       | 4  | 0 | 0 | 0 |
| Rab9b         | 3  | 0 | 0 | 0 |
| Tmsb15b2      | 1  | 0 | 0 | 0 |
| Tmsb15l       | 5  | 0 | 0 | 0 |
| Mcart6        | 6  | 0 | 0 | 0 |
| Ripply1       | 3  | 0 | 0 | 0 |
| Morc4         | 4  | 0 | 0 | 0 |
| Rbm41         | 3  | 0 | 0 | 0 |
| Tsc22d3       | 3  | 0 | 0 | 0 |
| Psmc10        | 2  | 0 | 0 | 0 |
| Kcne1l        | 1  | 0 | 0 | 0 |

|               |   |   |   |   |
|---------------|---|---|---|---|
| Acsl4         | 4 | 0 | 0 | 0 |
| Ammecr1       | 2 | 0 | 0 | 0 |
| Lhfp1         | 5 | 0 | 0 | 0 |
| Amot          | 3 | 0 | 0 | 0 |
| Gm5644        | 1 | 0 | 0 | 0 |
| Gm8261        | 1 | 0 | 0 | 0 |
| Lrch2         | 7 | 0 | 0 | 0 |
| Tmem29        | 2 | 0 | 0 | 0 |
| Tro           | 5 | 0 | 0 | 0 |
| Maged2        | 4 | 0 | 0 | 0 |
| Gnl3l         | 3 | 0 | 0 | 0 |
| Tsr2          | 3 | 0 | 0 | 0 |
| A230072E10Rik | 1 | 0 | 0 | 0 |
| 2900056M20Rik | 3 | 0 | 0 | 0 |
| Tspyl2        | 4 | 0 | 0 | 0 |
| Shroom2       | 5 | 0 | 0 | 0 |
| Kctd12b       | 2 | 0 | 0 | 0 |
| Sat1          | 6 | 0 | 0 | 0 |
| Prdx4         | 3 | 0 | 0 | 0 |
| Ptchd1        | 1 | 0 | 0 | 0 |
| Sms           | 4 | 0 | 0 | 0 |
| Mbtps2        | 6 | 0 | 0 | 0 |
| Yy2           | 1 | 0 | 0 | 0 |
| Cnksr2        | 4 | 0 | 0 | 0 |
| Pdha1         | 3 | 0 | 0 | 0 |
| Ppef1         | 8 | 0 | 0 | 0 |
| Cdkl5         | 2 | 0 | 0 | 0 |
| Reps2         | 7 | 0 | 0 | 0 |
| Gm15201       | 2 | 0 | 0 | 0 |
| Txlng         | 2 | 0 | 0 | 0 |
| Syap1         | 2 | 0 | 0 | 0 |
| S100g         | 1 | 0 | 0 | 0 |
| 1700045I19Rik | 1 | 0 | 0 | 0 |
| Zrsr2         | 3 | 0 | 0 | 0 |
| Bmx           | 4 | 0 | 0 | 0 |
| Mospd2        | 2 | 0 | 0 | 0 |
| Ofd1          | 2 | 0 | 0 | 0 |
| Rab9          | 2 | 0 | 0 | 0 |
| Tceanc        | 4 | 0 | 0 | 0 |
| Tmsb4x        | 1 | 0 | 0 | 0 |
| Prps2         | 2 | 0 | 0 | 0 |
| Msl3          | 8 | 0 | 0 | 0 |
| Hccs          | 3 | 0 | 0 | 0 |
| G530011O06Rik | 1 | 0 | 0 | 0 |
| Wdr45         | 5 | 0 | 0 | 0 |
| Pim2          | 1 | 0 | 0 | 0 |
| Timm17b       | 1 | 0 | 0 | 0 |



|               |    |   |   |   |
|---------------|----|---|---|---|
| Rbm10         | 2  | 0 | 0 | 0 |
| Araf          | 2  | 0 | 0 | 0 |
| Gm6274        | 1  | 0 | 0 | 0 |
| XLOC_036226   | 2  | 0 | 0 | 0 |
| XLOC_036267   | 1  | 0 | 0 | 0 |
| F8a           | 1  | 0 | 0 | 0 |
| Plxnb3        | 10 | 0 | 0 | 0 |
| Ssr4          | 2  | 0 | 0 | 0 |
| Brcc3         | 4  | 0 | 0 | 0 |
| Tbl1x         | 2  | 0 | 0 | 0 |
| Gm6954        | 1  | 0 | 0 | 0 |
| Kif4          | 1  | 0 | 0 | 0 |
| Nono          | 6  | 0 | 0 | 0 |
| Armcx3        | 3  | 0 | 0 | 0 |
| Bhlhb9        | 2  | 0 | 0 | 0 |
| Bex4          | 2  | 0 | 0 | 0 |
| Ngfrap1       | 4  | 0 | 0 | 0 |
| BC065397      | 7  | 0 | 0 | 0 |
| Rgag1         | 1  | 0 | 0 | 0 |
| Smt3h1-ps     | 1  | 0 | 0 | 0 |
| Phka2         | 3  | 0 | 0 | 0 |
| Ctps2         | 5  | 0 | 0 | 0 |
| Ap1s2         | 6  | 0 | 0 | 0 |
| Tmem27        | 1  | 0 | 0 | 0 |
| AK051847      | 4  | 0 | 0 | 0 |
| Magix         | 3  | 0 | 0 | 0 |
| 1810030007Rik | 1  | 0 | 0 | 0 |
| 4930578C19Rik | 4  | 0 | 0 | 0 |
| Slc10a3       | 1  | 0 | 0 | 0 |
| Cited1        | 2  | 0 | 0 | 0 |
| Timm8a1       | 1  | 0 | 0 | 0 |
| Tceal5        | 3  | 0 | 0 | 0 |
| Gm15013       | 1  | 0 | 0 | 0 |
| Capn6         | 4  | 0 | 0 | 0 |
| XLOC_036850   | 2  | 0 | 0 | 0 |
| Apex2         | 2  | 0 | 0 | 0 |
| Nhs           | 3  | 0 | 0 | 0 |
| Tfe3          | 1  | 0 | 0 | 0 |
| Ankrd58       | 1  | 0 | 0 | 0 |
| XLOC_036258   | 2  | 0 | 0 | 0 |
| XLOC_036326   | 1  | 0 | 0 | 0 |
| XLOC_036353   | 4  | 0 | 0 | 0 |
| AK050859      | 5  | 0 | 0 | 0 |
| Zc3h12b       | 3  | 0 | 0 | 0 |
| Heph          | 1  | 0 | 0 | 0 |
| Eda           | 1  | 0 | 0 | 0 |
| Pabpc5        | 1  | 0 | 0 | 0 |

|               |   |   |   |   |
|---------------|---|---|---|---|
| 3110007F17Rik | 2 | 0 | 0 | 0 |
| XLOC_036434   | 3 | 0 | 0 | 0 |
| XLOC_036493   | 1 | 0 | 0 | 0 |
| Map3k15       | 2 | 0 | 0 | 0 |
| XLOC_036510   | 1 | 0 | 0 | 0 |
| Pdzx          | 1 | 0 | 0 | 0 |
| Rbm3          | 1 | 0 | 0 | 0 |
| XLOC_036574   | 1 | 0 | 0 | 0 |
| AK039500      | 1 | 0 | 0 | 0 |
| Mtap7d3       | 3 | 0 | 0 | 0 |
| Gm5391        | 1 | 0 | 0 | 0 |
| 4933407K13Rik | 1 | 0 | 0 | 0 |
| Gm16462       | 1 | 0 | 0 | 0 |
| Il1rapl1      | 1 | 0 | 0 | 0 |
| Xkrx          | 2 | 0 | 0 | 0 |
| Ribc1         | 1 | 0 | 0 | 0 |
| XLOC_036888   | 1 | 0 | 0 | 0 |
| Slc35a2       | 2 | 0 | 0 | 0 |
| Gpr34         | 2 | 0 | 0 | 0 |
| Lonrf3        | 2 | 0 | 0 | 0 |
| XLOC_036264   | 1 | 0 | 0 | 0 |
| XLOC_036277   | 1 | 0 | 0 | 0 |
| XLOC_036295   | 2 | 0 | 0 | 0 |
| Xlr3b         | 3 | 0 | 0 | 0 |
| 2010000I03Rik | 3 | 0 | 0 | 0 |
| XLOC_036451   | 1 | 0 | 0 | 0 |
| Figf          | 3 | 0 | 0 | 0 |
| AK021262      | 1 | 0 | 0 | 0 |
| XLOC_036643   | 3 | 0 | 0 | 0 |
| Btk           | 1 | 0 | 0 | 0 |
| Chrdl1        | 2 | 0 | 0 | 0 |
| Siah1b        | 1 | 0 | 0 | 0 |
| Taz           | 2 | 0 | 0 | 0 |
| XLOC_036317   | 1 | 0 | 0 | 0 |
| XLOC_036390   | 1 | 0 | 0 | 0 |
| Tlr13         | 1 | 0 | 0 | 0 |
| Dach2         | 1 | 0 | 0 | 0 |
| XLOC_036420   | 1 | 0 | 0 | 0 |
| Cenpi         | 1 | 0 | 0 | 0 |
| XLOC_036497   | 1 | 0 | 0 | 0 |
| Was           | 1 | 0 | 0 | 0 |
| Gm10489       | 1 | 0 | 0 | 0 |
| XLOC_036575   | 1 | 0 | 0 | 0 |
| C330007P06Rik | 1 | 0 | 0 | 0 |
| AK082553      | 2 | 0 | 0 | 0 |
| Xlr3a         | 1 | 0 | 0 | 0 |
| XLOC_036679   | 1 | 0 | 0 | 0 |

|               |    |   |   |   |
|---------------|----|---|---|---|
| Dnase1l1      | 2  | 0 | 0 | 0 |
| XLOC_036739   | 2  | 0 | 0 | 0 |
| Cxcr3         | 1  | 0 | 0 | 0 |
| Cysltr1       | 1  | 0 | 0 | 0 |
| Gm14957       | 1  | 0 | 0 | 0 |
| Mageh1        | 1  | 0 | 0 | 0 |
| Gm6787        | 1  | 0 | 0 | 0 |
| XLOC_036208   | 1  | 0 | 0 | 0 |
| Gm14549       | 1  | 0 | 0 | 0 |
| F630028O10Rik | 1  | 0 | 0 | 0 |
| BC058988      | 1  | 0 | 0 | 0 |
| Elf4          | 1  | 0 | 0 | 0 |
| XLOC_036639   | 1  | 0 | 0 | 0 |
| XLOC_036664   | 1  | 0 | 0 | 0 |
| XLOC_036719   | 1  | 0 | 0 | 0 |
| XLOC_036776   | 1  | 0 | 0 | 0 |
| XLOC_036841   | 1  | 0 | 0 | 0 |
| Ube1y1        | 2  | 0 | 0 | 0 |
| Smcy          | 7  | 0 | 0 | 0 |
| Kdm5d         | 1  | 0 | 0 | 0 |
| Eif2s3y       | 6  | 0 | 0 | 0 |
| Uty           | 10 | 0 | 0 | 0 |
| Ddx3y         | 1  | 0 | 0 | 0 |
| XLOC_037363   | 2  | 0 | 0 | 0 |
| XLOC_037361   | 1  | 0 | 0 | 0 |
