# Supplementary material
Source: PubMed Central journal article supplement (PMC5864114)
Supplement: NIHMS942947-supplement-Supp_TableS12.pdf [file NIHMS942947-supplement-Supp_TableS12.pdf]

Table S12

| Category        | Term                                                    | Number of genes | % of genes | p-value  | Gene Symbols                                                                                                                                     |
|-----------------|---------------------------------------------------------|-----------------|------------|----------|--------------------------------------------------------------------------------------------------------------------------------------------------|
| GOTERM_BP_FAT   | GO:0048562~embryonic organ morphogenesis                | 4               | 9.52381    | 0.003876 | CHD7, FZD3, CELSR1, WNT9A                                                                                                                        |
| INTERPRO        | IPR017981:GPCR, family 2-like                           | 3               | 7.142857   | 0.006831 | GPR123, FZD3, CELSR1                                                                                                                             |
| GOTERM_BP_FAT   | GO:0042472~inner ear morphogenesis                      | 3               | 7.142857   | 0.007764 | CHD7, FZD3, CELSR1                                                                                                                               |
| GOTERM_BP_FAT   | GO:0001736~establishment of planar polarity             | 2               | 4.761905   | 0.009897 | FZD3, CELSR1                                                                                                                                     |
| GOTERM_BP_FAT   | GO:0042471~ear morphogenesis                            | 3               | 7.142857   | 0.009899 | CHD7, FZD3, CELSR1                                                                                                                               |
| GOTERM_BP_FAT   | GO:0048568~embryonic organ development                  | 4               | 9.52381    | 0.011773 | CHD7, FZD3, CELSR1, WNT9A                                                                                                                        |
| GOTERM_BP_FAT   | GO:0048839~inner ear development                        | 3               | 7.142857   | 0.013103 | CHD7, FZD3, CELSR1                                                                                                                               |
| GOTERM_BP_FAT   | GO:0007164~establishment of tissue polarity             | 2               | 4.761905   | 0.01383  | FZD3, CELSR1                                                                                                                                     |
| GOTERM_BP_FAT   | GO:0007423~sensory organ development                    | 4               | 9.52381    | 0.01399  | CHD7, MITF, FZD3, CELSR1                                                                                                                         |
| UP_SEQ_FEATURE  | splice variant                                          | 17              | 40.47619   | 0.017456 | SGCZ, RASEF, PIK3C2A, MITF, DQX1, ITGA3, NFIX, RICTOR, MEGF11, FLNA, PIGN, CHD7, DTNB, SLC39A8, SRGAP3, RAPGEFL1, DCAF15                         |
| GOTERM_BP_FAT   | GO:0043583~ear development                              | 3               | 7.142857   | 0.01798  | CHD7, FZD3, CELSR1                                                                                                                               |
| GOTERM_BP_FAT   | GO:0001738~morphogenesis of a polarized epithelium      | 2               | 4.761905   | 0.02165  | FZD3, CELSR1                                                                                                                                     |
| GOTERM_MF_FAT   | GO:0030695~GTPase regulator activity                    | 4               | 9.52381    | 0.02354  | GBF1, SRGAP3, RICTOR, RAPGEFL1                                                                                                                   |
| GOTERM_BP_FAT   | GO:0031532~actin cytoskeleton reorganization            | 2               | 4.761905   | 0.023595 | RICTOR, FLNA                                                                                                                                     |
| GOTERM_MF_FAT   | GO:0060589~nucleoside-triphosphatase regulator activity | 4               | 9.52381    | 0.024571 | GBF1, SRGAP3, RICTOR, RAPGEFL1                                                                                                                   |
| GOTERM_MF_FAT   | GO:0005085~guanyl-nucleotide exchange factor activity   | 3               | 7.142857   | 0.026417 | GBF1, RICTOR, RAPGEFL1                                                                                                                           |
| KEGG_PATHWAY    | mmu04916:Melanogenesis                                  | 3               | 7.142857   | 0.027241 | MITF, FZD3, WNT9A                                                                                                                                |
| GOTERM_BP_FAT   | GO:0016055~Wnt receptor signaling pathway               | 3               | 7.142857   | 0.027275 | MITF, FZD3, WNT9A                                                                                                                                |
| GOTERM_BP_FAT   | GO:0030318~melanocyte differentiation                   | 2               | 4.761905   | 0.03134  | MITF, HPS1                                                                                                                                       |
| GOTERM_BP_FAT   | GO:0050931~pigment cell differentiation                 | 2               | 4.761905   | 0.033267 | MITF, HPS1                                                                                                                                       |
| GOTERM_BP_FAT   | GO:0048598~embryonic morphogenesis                      | 4               | 9.52381    | 0.033472 | CHD7, FZD3, CELSR1, WNT9A                                                                                                                        |
| SP_PIR_KEYWORDS | alternative splicing                                    | 16              | 38.09524   | 0.03582  | RASEF, PIK3C2A, MITF, DQX1, ITGA3, NFIX, RICTOR, MEGF11, FLNA, PIGN, CHD7, DTNB, SLC39A8, SRGAP3, RAPGEFL1, DCAF15                               |
| GOTERM_BP_FAT   | GO:0060341~regulation of cellular localization          | 3               | 7.142857   | 0.040355 | ABCA2, CELSR1, FLNA                                                                                                                              |
| SP_PIR_KEYWORDS | phosphoprotein                                          | 20              | 47.61905   | 0.044746 | PIK3C2A, RASEF, FILIP1, MEX3B, MITF, ABCA2, NFIX, ITGA3, CELSR1, RICTOR, FLNA, CUL5, CHD7, ELOVL5, WWP1, SLC39A8, SRGAP3, EIF3J, EIF2AK2, DCAF15 |
| KEGG_PATHWAY    | mmu05200:Pathways in cancer                             | 4               | 9.52381    | 0.048565 | MITF, FZD3, ITGA3, WNT9A                                                                                                                         |
| GOTERM_BP_FAT   | GO:0043009~chordate embryonic development               | 4               | 9.52381    | 0.049845 | CHD7, FZD3, CELSR1, WNT9A                                                                                                                        |
